# Supplementary material for: Maximizing CRISPRi efficacy and accessibility with dual-sgRNA libraries and optimal effectors
Source: eLife. 2022 Dec 28;11:e81856. doi: 10.7554/eLife.81856 (PMC9829409; doi:10.7554/eLife.81856)
Supplement: Figure 2—source data 1. [file elife-81856-fig2-data1.xlsx]

## Sheet: Figure 2C
	no plasmid t-test p-value	average growth defect per day
no plasmid	0	−0.50%
GFP only plasmid	0.1982	−0.07%
dCas9	0.5436	−0.29%
dCas9-Kox1	0.0571	0.0012
Zim3-dCas9	0.2505	−0.16%
dCas9-Kox1-MeCP2	0.0162	0.0096
SID-dCas9-Kox1	0.0002	0.0609
