# Supplementary material for: Maximizing CRISPRi efficacy and accessibility with dual-sgRNA libraries and optimal effectors
Source: eLife. 2022 Dec 28;11:e81856. doi: 10.7554/eLife.81856 (PMC9829409; doi:10.7554/eLife.81856)
Supplement: Figure 2—source data 2. [file elife-81856-fig2-data2.xlsx]

## Sheet: Figure 2C
	# of differentially expressed genes (p < 0.05)
dCas9	3
dCas9-Kox1	2
Zim3-dCas9	3
dCas9-Kox1-MeCP2	53
SID-dCas9-Kox1	4282
