# Supplementary material for: Maximizing CRISPRi efficacy and accessibility with dual-sgRNA libraries and optimal effectors
Source: eLife. 2022 Dec 28;11:e81856. doi: 10.7554/eLife.81856 (PMC9829409; doi:10.7554/eLife.81856)
Supplement: Supplementary file 1. [file elife-81856-supp1.xlsx]

## Sheet: Table_S1
gene	transcript	sgID_A	sgID_B	protospacer_A	protospacer_B
AARS	P1P2	AARS_+_70323318.23-P1P2	AARS_+_70323353.23-P1P2	GCGGCGACCCTAGGAGAGGT	CAGAGTCCCCCGCCAAGGGC
ABCE1	P1P2	ABCE1_-_146019502.23-P1P2	ABCE1_+_146019651.23-P1P2	GGCCGTGAGAACACGCTGTG	TTGGTTAGGCCTTAGGTGGC
ACTR10	P1P2	ACTR10_+_58666892.23-P1P2	ACTR10_+_58666933.23-P1P2	GAAGAGGGTCGCAGTCTCCG	TGCCGCTCTACGAGGGCCTC
ACTR6	P1P2	ACTR6_-_100594606.23-P1P2	ACTR6_-_100594617.23-P1P2	GCGGAAAGGGAAAACAACTA	CACCGCAGCCGTAGTTGTTC
AFG3L2	P1P2	AFG3L2_-_12377212.23-P1P2	AFG3L2_+_12377215.23-P1P2	GGCGCGCCGGCGGCTCACGG	AAGCTCTCAACGCGGCGTCC
ANAPC13	P1P2	ANAPC13_-_134204795.23-P1P2	ANAPC13_-_134204769.23-P1P2	GGGGCGCTGGAAACCCTTAC	AGGTTTTGGAGGCGCGGGAC
ANAPC2	P1P2	ANAPC2_+_140082989.23-P1P2	ANAPC2_+_140082993.23-P1P2	GAGCGAATCTCGGAGTCGGT	ACTCCGAGATTCGCTCGGCC
ANAPC4	P1P2	ANAPC4_+_25378934.23-P1P2	ANAPC4_-_25378972.23-P1P2	GCCCCACCGGCAGACTAACA	GTACCTGCAAGAGTCCCCAC
ANAPC5	P1P2	ANAPC5_+_121790181.23-P1P2	ANAPC5_-_121790201.23-P1P2	GGCCTTGTGGTGACAACTGG	TGTGGTGACAACTGGCGGCC
AP2M1	P1	AP2M1_+_183892702.23-P1	AP2M1_-_183892660.23-P1	GTGCCGGCCCGGCCACTCTC	CGGCTTTCACCGCAGTGCCC
AQR	P1P2	AQR_-_35261877.23-P1P2	AQR_+_35261872.23-P1P2	GCTCTGGGCAGCGGCAACCC	TGGTCCACTTCCCTTAAGTC
ARCN1	P1P2	ARCN1_-_118443150.23-P1P2	ARCN1_-_118443372.23-P1P2	GGCAAGAGGCGAAGCGGCAG	TAGACCCTCAGGGCGGGGCC
ASCC3	P1P2	ASCC3_-_101329197.23-P1P2	ASCC3_-_101329188.23-P1P2	GCGCACAGACCCGGCGAGGA	GGTCTGTGCGTCTTTGCGTC
ATF5	P1P2	ATF5_+_50432363.23-P1P2	ATF5_+_50432513.23-P1P2	GCCCTCGCGCGGCCCCAACC	GCGTAGCCCCGGCCATGGCC
ATP1A1	P1P2	ATP1A1_-_116915944.23-P1P2	ATP1A1_-_116915929.23-P1P2	GACAGCGGTAGCAGCCCGGG	CTGTTGCCACGTGTCCGCCC
ATP5B	P1P2	ATP5B_-_57039709.23-P1P2	ATP5B_-_57039762.23-P1P2	GAGTCTCCGCAAGGCCCCGG	CCCGGACTACGCCATGTTGC
ATP5F1	P1P2	ATP5F1_+_111992112.23-P1P2	ATP5F1_-_111991570.23-P1P2	GGCGTCCCTGTGACCCCGAT	GGGTCGCGTCACCGAGCTGC
ATP6V1A	P1P2	ATP6V1A_+_113465895.23-P1P2	ATP6V1A_-_113465930.23-P1P2	GAGAGGCTGTCACCACGGAG	ACCGAGGACCCAGAGGCTGC
ATP6V1B2	P1P2	ATP6V1B2_-_20054940.23-P1P2	ATP6V1B2_-_20054985.23-P1P2	GGGCGCTGCGGGCGATGCGG	ACCGGTGGGCACGGGTAGCC
ATP6V1C1	P1P2	ATP6V1C1_-_104033344.23-P1P2	ATP6V1C1_+_104033345.23-P1P2	GTTGGGTAGAGGAAGCCGTG	GAGCTTAGGTCGGGAAGGGC
ATR	P1P2	ATR_-_142297649.23-P1P2	ATR_+_142297629.23-P1P2	GGCCCGACGGAGCCGTGTGG	GACGGAGCCGTGTGGAGGCC
ATXN10	P1P2	ATXN10_-_46067769.23-P1P2	ATXN10_+_46067906.23-P1P2	GTCAGCCTAGAGCTCTCCGG	CCTCGTCAGGCTCGACCCAC
AURKB	P1P2	AURKB_-_8113837.23-P1P2	AURKB_-_8113518.23-P1P2	GGCGCAAGGCCTGCGACAGG	CTGGCCCTACGGCCGACAGC
BCAS2	P1P2	BCAS2_+_115123990.23-P1P2	BCAS2_+_115124198.23-P1P2	GGCTGCAGCGCTGGTGGAGG	GTGCCCGCCATTCTGAGGAC
BCR	P1P2	BCR_-_23522920.23-P1P2	BCR_+_23523145.23-P1P2	GGGAGCCCCGCACACAATAG	TGGTGGACCCGGTGGGCTTC
BDP1	P1P2	BDP1_+_70751690.23-P1P2	BDP1_-_70751510.23-P1P2	GCGGAACATGGCGGAGGCAG	TGCCACACACCGATGGCTAC
BGLAP	P1P2	BGLAP_-_156182834.23-P1P2	BGLAP_+_156183115.23-P1P2	GAAGCAAGTAGCGCCAATCT	TAGGAGTCAGGGTATTCACC
BIRC5	P1P2	BIRC5_-_76210386.23-P1P2	BIRC5_-_76210383.23-P1P2	GCGGGACCCGTTGGCAGAGG	CTGCCAACGGGTCCCGCGAC
BMS1	P1P2	BMS1_-_43278259.23-P1P2	BMS1_-_43278283.23-P1P2	GCGGTGTCCATGCTGACCTG	AACCTGCTCGCAGCCGCGAC
BNIP1	P1P2	BNIP1_-_172571554.23-P1P2	BNIP1_-_172571577.23-P1P2	GGCCGGCGTCCCCAACATGG	GACGTGGACGTCTTGGGGAC
BORA	P1P2	BORA_+_73302094.23-P1P2	BORA_-_73302125.23-P1P2	GCGACTCCAGGGAGCTCCGG	CCAGTACCGACTCCAGGGAC
BUB3	P1P2	BUB3_-_124913930.23-P1P2	BUB3_-_124913973.23-P1P2	GTAGCCTGCGAGTGTTCTGA	CTACTCGCCACTCGCTGCGC
BUD13	P1P2	BUD13_-_116643467.23-P1P2	BUD13_+_116643652.23-P1P2	GCAAGAGGGAAGGAACTGCC	TGGAAAGCGGCGGAGCTGCC
C12orf45	P1P2	C12orf45_-_105380143.23-P1P2	C12orf45_-_105380117.23-P1P2	GAGGGAAGCATGGAGGTCCA	GCACTCTCAGGCCCGGATGC
C12orf60	P1P2	C12orf60_-_14956657.23-P1P2	C12orf60_-_14956654.23-P1P2	GGTCCTGTCTCTCGAGTTGG	ACTCGAGAGACAGGACCGTC
C14orf166	P1P2	C14orf166_+_52456301.23-P1P2	C14orf166_+_52456277.23-P1P2	GGGCCGGGAGAGAAGAAGCG	GTGCCTGCGCCTCCCGCTCC
C14orf178	P1P2	C14orf178_+_78227476.23-P1P2	C14orf178_+_78227426.23-P1P2	GTCGCTCGCGCTGGAAGAAG	TATCGAGGACCCCAATCAAC
C17orf49	P1	C17orf49_+_6915949.23-P1	C17orf49_+_6915965.23-P1	GAGCGGGCTCGGAAAGCGGT	GCTTGCACCTCGGCGATCCC
C3orf17	P1P2	C3orf17_-_112738463.23-P1P2	C3orf17_-_112738075.23-P1P2	GGGATTCTCACACGGTTCCA	GGGAACCCTTGCTCACCCGC
CAD	P1P2	CAD_+_27440280.23-P1P2	CAD_+_27440253.23-P1P2	GGCTGGAGAGAAGCCGGGCG	AGCGCGCCCGAGGCTCCTAC
CARF	P1P2	CARF_-_203776953.23-P1P2	CARF_+_203776955.23-P1P2	GGGTCGACGGTGGCCGATAG	ACTGTCGTGGGACTGCTCTC
CARS	P1P2	CARS_+_3078579.23-P1P2	CARS_-_3078598.23-P1P2	GAGCCATGGCAGATTCCTCC	TGGCAGATTCCTCCGGGCAC
CASP8AP2	P1P2	CASP8AP2_-_90539622.23-P1P2	CASP8AP2_-_90539614.23-P1P2	GGAGACCTCGGTGGGCAGAA	ACCGAGGTCTCCCTGGCATC
CCDC174	P1P2	CCDC174_-_14693290.23-P1P2	CCDC174_-_14693300.23-P1P2	GCGACGGAGGTAGGCTTACG	ACACAGGCCTCGTAAGCCTC
CCDC84	P1P2	CCDC84_-_118868873.23-P1P2	CCDC84_-_118868883.23-P1P2	GCCGCCGGATGGCGTAGGAT	CCAGCGGCCGATCCTACGCC
CCDC86	P1P2	CCDC86_-_60609614.23-P1P2	CCDC86_-_60609589.23-P1P2	GAGCCATGGATACACCGTTA	GTAAGTTTCCACACCCCTGC
CCT2	P1P2	CCT2_-_69979270.23-P1P2	CCT2_-_69979656.23-P1P2	GCCCGAGCACGAGCTGTGAG	CTGATGGCTCAGACCCCGTC
CCT3	P1P2	CCT3_+_156308067.23-P1P2	CCT3_-_156307693.23-P1P2	GTGAGGTGTAAGCCCTGAGG	ACTCCGCGTTCTGTCCCTCC
CCT4	P1P2	CCT4_+_62115703.23-P1P2	CCT4_-_62115399.23-P1P2	GGCTTACCGTTATTACACTG	TATAGAAGCAGCCCAGTGGC
CCT6A	P1P2	CCT6A_-_56119502.23-P1P2	CCT6A_+_56119464.23-P1P2	GGCCACGCCGCGCCGGCTCT	GATAGTTCCTCCCGGCCACC
CCT7	P1P2	CCT7_-_73461472.23-P1P2	CCT7_-_73461481.23-P1P2	GCGGCCCGGTCTCGGAGAAG	CTCTCCCCTCTTCTCCGAGC
CCT8	P1P2	CCT8_+_30445740.23-P1P2	CCT8_-_30446001.23-P1P2	GGCGTGCTGCCCTGGCTCAG	ACGCTGCTTTCCCAGAAGGC
CD3EAP	P1P2	CD3EAP_-_45909922.23-P1P2	CD3EAP_-_45909946.23-P1P2	GAACCTGGTGCGAGCAGCCC	ACACCTCAGGCAACCCTGTC
CDAN1	P1P2	CDAN1_+_43029296.23-P1P2	CDAN1_-_43029292.23-P1P2	GCAGAGCGCCCCGACCGGGA	TTTTGGAGTCGCTGCTGCGC
CDC16	P1P2	CDC16_+_115000554.23-P1P2	CDC16_-_115000772.23-P1P2	GAGCCGCTCTAGGTTCATGG	TTCTGGGCGAGGCGGAGACC
CDC20	P1P2	CDC20_-_43824671.23-P1P2	CDC20_-_43824687.23-P1P2	GCCGGTCGGAACTGCTCCGG	CCTCTCACCGTGCCCTCCGC
CDC23	P1P2	CDC23_+_137548970.23-P1P2	CDC23_-_137548987.23-P1P2	GAGTACCTCCATGGTCCCGG	CCATGGTCCCGGTGGCTGTC
CDC27	P1P2	CDC27_+_45266576.23-P1P2	CDC27_-_45266589.23-P1P2	GGGCCGGAGCCGCTACAGGG	CTACAGGGGGGGCCTGAGGC
CDC40	P1P2	CDC40_+_110501678.23-P1P2	CDC40_+_110501672.23-P1P2	GGACCCTGAACCCGAACCAT	CTTCCTATGGTTCGGGTTCC
CDC5L	P1P2	CDC5L_-_44355475.23-P1P2	CDC5L_+_44355487.23-P1P2	GAGGTCGCGCTTGGAGGAAG	GTGGCCCAATCGCTGTTACC
CDCA8	P1P2	CDCA8_+_38158230.23-P1P2	CDCA8_-_38158209.23-P1P2	GACCTGCGGTCCCGAGACAA	GTGAGAGAGAGCGGCTCTAC
CDK1	P1P2	CDK1_-_62538284.23-P1P2	CDK1_+_62538309.23-P1P2	GAATTGAGCGGAGAGCGACG	CGGAATAATAAGCCGGGTAC
CEBPG	P1P2	CEBPG_-_33864240.23-P1P2	CEBPG_-_33864647.23-P1P2	GAACTCTGTGAGGGACGCCG	CCGGCTTCCCCTGCTCGCCC
CEBPZ	P1P2	CEBPZ_+_37458499.23-P1P2	CEBPZ_+_37458502.23-P1P2	GGCGTGGAGAGTTCCGAAGG	TCGGAACTCTCCACGCCTGC
CENPA	P2	CENPA_-_27008942.23-P2	CENPA_-_27008960.23-P2	GGCGGACTTCTGCCAAGCAC	CGAGCCTCACATGAGCCGGC
CENPC	P1P2	CENPC_-_68411108.23-P1P2	CENPC_-_68411111.23-P1P2	GGAGCCAGCGCAACTGTCTG	CCTCAGACAGTTGCGCTGGC
CENPE	P1P2	CENPE_+_104119357.23-P1P2	CENPE_-_104119523.23-P1P2	GGGCGCCGCCCTGAGCCGGA	CGGAGGGTCCTGGCCATTTC
CENPI	P1P2	CENPI_-_100353207.23-P1P2	CENPI_-_100353200.23-P1P2	GGGCGGCATTCGGTGGTCAG	CCGAATGCCGCCTCCGGAAC
CENPJ	P1P2	CENPJ_+_25496834.23-P1P2	CENPJ_+_25496971.23-P1P2	GGCCCTGCGCCGGAGATGGA	CAATCGCCGCCTCTGTCGGC
CENPM	P1P2	CENPM_+_42342939.23-P1P2	CENPM_+_42343131.23-P1P2	GAGGTCAACTGAGCTCTCTG	CCCTGAGTCCAGCCCCTAGC
CENPP	P1P2	CENPP_+_95087933.23-P1P2	CENPP_-_95088235.23-P1P2	GGCCGCGTGCCTCACTAAAG	ACCTGCGCGCTTCACCCGCC
CENPT	P1P2	CENPT_+_67867777.23-P1P2	CENPT_-_67867769.23-P1P2	GGCTGGCTGGGCGGTTAGGA	AGACGATGGCTGACCACAAC
CEP192	P1P2	CEP192_+_12991384.23-P1P2	CEP192_+_12991736.23-P1P2	GTGTGCAGCGGGAAAGTCCA	CTCTTGTCTGGGGACTTCCC
CHAF1B	P1P2	CHAF1B_+_37757724.23-P1P2	CHAF1B_+_37757745.23-P1P2	GGAGGGACCCGGACAGTCAG	GGTACGGCTTCCCTGGCCCC
CHCHD4	P1P2	CHCHD4_+_14166228.23-P1P2	CHCHD4_-_14165915.23-P1P2	GGAGGGAGGTCACGGCGTAA	CAGAGGGGCCTGTGCGTAGC
CHEK1	P1P2	CHEK1_-_125495912.23-P1P2	CHEK1_-_125495934.23-P1P2	GGGCAAAGGACAGTCCGGTG	TACTCTACCGGCCGCCCTTC
CHERP	P1P2	CHERP_+_16653219.23-P1P2	CHERP_-_16653216.23-P1P2	GGCGCTGGTGGTCGATCGTG	GAGGACGTTCCCCGCGGCCC
CHMP2A	P1P2	CHMP2A_+_59066420.23-P1P2	CHMP2A_+_59066434.23-P1P2	GCCGAGGGGCCTTAGTTGGT	CTCGGTCCTGTCGCCGCCGC
CHMP3	P1P2	CHMP3_-_86790522.23-P1P2	CHMP3_+_86790491.23-P1P2	GCTTTCAGTTCCCCGCGCCC	CTTCCGGCTTTCAGTTCCCC
CHMP6	P1P2	CHMP6_-_78965692.23-P1P2	CHMP6_+_78965716.23-P1P2	GGGTGGCGATTGGACTTGGT	TGGGTAACCTGTTCGGCCGC
CINP	P1P2	CINP_+_102829193.23-P1P2	CINP_-_102829164.23-P1P2	GCTCCTTCTACGGATATCTG	TTCCCGGGGTGGGGTGGCTC
CIT	P1P2	CIT_-_120314748.23-P1P2	CIT_-_120314778.23-P1P2	GGGAACCGGCCGACTACACT	CCTGTCAGCACTAACTGCAC
CLNS1A	P1P2	CLNS1A_-_77348782.23-P1P2	CLNS1A_-_77348773.23-P1P2	GCAGCAGAGTGCGGCAACAC	CACTCTGCTGCTATGAGCTC
CLSPN	P1P2	CLSPN_-_36235152.23-P1P2	CLSPN_+_36235482.23-P1P2	GGGAAACGCGCCAAAGGGGA	CTGCGCTCCACTAGGGACGC
CLTC	P1P2	CLTC_+_57697290.23-P1P2	CLTC_+_57697263.23-P1P2	GGGGGCCAGGAGAGCCGCAA	GAGTCTGCGCTGCGCCCGGC
CMAS	P1P2	CMAS_-_22199218.23-P1P2	CMAS_-_22199189.23-P1P2	GCCCGGATGTGGAGAAGCTG	TCACCACCTCAGCTCGGCGC
CNOT1	P1P2	CNOT1_+_58663696.23-P1P2	CNOT1_-_58663535.23-P1P2	GGCGGAGTTAACCGAAGAGG	CTGGAAGCGTTTCCCGGAGC
COG2	P1P2	COG2_+_230778253.23-P1P2	COG2_+_230778281.23-P1P2	GCGGCCACCGCCAGTTTCCA	AGTCGGTCTGCGCAGCCTCC
COG3	P1P2	COG3_+_46039129.23-P1P2	COG3_-_46039126.23-P1P2	GTCAGCAGCAGCGAGATGGA	CGACAGAGAGACCTGGGCCC
COG8	P1P2	COG8_+_69373427.23-P1P2	COG8_-_69373434.23-P1P2	GACCGCGGCGACTATCCCAT	ATCGGTAGCCACGGCCACAC
COPA	P1P2	COPA_+_160313013.23-P1P2	COPA_+_160313005.23-P1P2	GTGACGTGGAGGCGTCCGAA	TGCTGCCCTTCGGACGCCTC
COPB1	P1P2	COPB1_-_14521352.23-P1P2	COPB1_-_14521337.23-P1P2	GACTGCGGCTCCGTCTACTC	CAGTAGACGGATCCGCGGCC
COPB2	P1P2	COPB2_+_139108455.23-P1P2	COPB2_+_139108459.23-P1P2	GTGACGGTCAGTGGATCGGT	ATCCACTGACCGTCAGACTC
COPS4	P1P2	COPS4_-_83956404.23-P1P2	COPS4_-_83956572.23-P1P2	GGCAGCCGTGCGACAGGATT	CCTTGGACGTCAGGCCGGCC
COPS6	P1P2	COPS6_-_99686651.23-P1P2	COPS6_-_99686659.23-P1P2	GGGCGGCTGCAGCTACGAAC	CCGGTCCCGTTCGTAGCTGC
COPZ1	P1	COPZ1_+_54718920.23-P1	COPZ1_-_54719176.23-P1	GCCCGCAGCTGGTGCCGACG	ACTCTATGCCCTCTCCCCGC
COX10	P1P2	COX10_-_13972882.23-P1P2	COX10_-_13972875.23-P1P2	GCAGCGTCCCGTGAGGAGAG	CACGGGACGCTGGGCGCCGC
COX11	P1P2	COX11_+_53045977.23-P1P2	COX11_+_53045613.23-P1P2	GGCTCTGGCGTCCTGGATGG	CCCTGCGGGCGGCGCCGGCC
CPSF1	P1P2	CPSF1_+_145634685.23-P1P2	CPSF1_+_145634667.23-P1P2	GGTCCCGGTTCCTCTCGAGT	ACCTGGCAGTTGGAGCCGAC
CPSF2	P1P2	CPSF2_-_92588375.23-P1P2	CPSF2_+_92588358.23-P1P2	GTCTGCCGGCCGGTAGTCCC	GCCGGTAGTCCCTGGCGCTC
CRNKL1	P1P2	CRNKL1_+_20033001.23-P1P2	CRNKL1_-_20032878.23-P1P2	GGCCGGGGACAGGTGTCCAG	TGAGGGTGCCCGGGTTGGGC
CSE1L	P1P2	CSE1L_-_47662888.23-P1P2	CSE1L_-_47662891.23-P1P2	GGTTTGAATGTGAGGCGGAG	CCGCTCCGCCTCACATTCAC
CSTF1	P1P2	CSTF1_+_54967480.23-P1P2	CSTF1_-_54967707.23-P1P2	GCGACCGCGGAGAGCACCCT	AATCTACCGCTCCGAGCGCC
CSTF3	P1P2	CSTF3_-_33182802.23-P1P2	CSTF3_-_33182791.23-P1P2	GGCAGTCGGAGGAACAGACG	CCGACTGCTCCAGACATGTC
CTR9	P1P2	CTR9_-_10772912.23-P1P2	CTR9_+_10772881.23-P1P2	GAGCCTGAAGCGGAGACTAC	CTGGATTAGCCTGAAGCGGC
CWC15	P1P2	CWC15_+_94706513.23-P1P2	CWC15_+_94706688.23-P1P2	GGCGGAACCGAGTGCCTGTC	AAGATCATACAGACGCCATC
CWC22	P1P2	CWC22_+_180871433.23-P1P2	CWC22_+_180871546.23-P1P2	GGAGCCTCTGGAGTCCATTG	GTCCGCTCAGGCAGTCAGTC
CWF19L2	P1P2	CWF19L2_+_107328479.23-P1P2	CWF19L2_+_107328464.23-P1P2	GTGCGAAGAGTATCGAAGAG	GGTCTGTTCTTTCCGCTCTC
DAP3	P1P2	DAP3_-_155658904.23-P1P2	DAP3_-_155658930.23-P1P2	GAGTCTCAGGACGGGCGCTT	ACACACGCTGCCTGGGGCCC
DARS	P1P2	DARS_-_136742757.23-P1P2	DARS_-_136743104.23-P1P2	GCCGGGGACACGCTTCTAGT	CTTTGGCCTGCCTTACGGAC
DBR1	P1P2	DBR1_+_137893744.23-P1P2	DBR1_+_137893686.23-P1P2	GTTTGCAGGAGTCTACACCC	GCCCAGGACCGACTGATCGC
DCAF13	P1P2	DCAF13_-_104427649.23-P1P2	DCAF13_+_104427404.23-P1P2	GACTCCTAGCGGACACCTCG	CTCCCGAGTCTCCGCCCTGC
DCTN3	P1P2	DCTN3_+_34620457.23-P1P2	DCTN3_+_34620473.23-P1P2	GGGTGGGTCGGTAGTAGCGA	ACCTCGGCCAGGAAACAGCC
DDX18	P1P2	DDX18_-_118572337.23-P1P2	DDX18_-_118572282.23-P1P2	GCTGTGTGGCGCCTTATTCT	TTCCGGCCGCACGTGCGCAC
DDX20	P1P2	DDX20_-_112298588.23-P1P2	DDX20_-_112298555.23-P1P2	GTCGGGAGCCTTAGCAGCAG	CCGCCATGGTAGCCGCGCCC
DDX21	P1P2	DDX21_-_70715959.23-P1P2	DDX21_+_70715930.23-P1P2	GCGCGGTTGAGAAGACCGGT	CTCCACGCGGTTGAGAAGAC
DDX23	P1P2	DDX23_+_49245881.23-P1P2	DDX23_+_49245865.23-P1P2	GACGTTGAGGCCGCGTTGGG	CCCTGAGTCTGAACCGCCCC
DDX24	P1P2	DDX24_+_94547508.23-P1P2	DDX24_+_94547517.23-P1P2	GGGTACAGCGGCGGTTTCTG	CCGCTGTACCTCAGCTGCAC
DDX27	P1P2	DDX27_-_47836019.23-P1P2	DDX27_-_47836033.23-P1P2	GTCGGCTTAATCGGAACCAT	CGTCATCCTCGCCTATGGTC
DDX41	P1P2	DDX41_+_176943914.23-P1P2	DDX41_+_176943922.23-P1P2	GCGGAACCCGAACGGAAGGT	TTCGGGTTCCGACTCCTCCC
DDX47	P1P2	DDX47_+_12966332.23-P1P2	DDX47_+_12966328.23-P1P2	GACAATCGGCTGGGACGCTT	ACCGAAGCGTCCCAGCCGAC
DDX52	P1P2	DDX52_-_36003440.23-P1P2	DDX52_-_36003249.23-P1P2	GGAGCCGGCGAAAGAGATCG	CCCTTGGGGTATTTTGCTTC
DDX56	P1P2	DDX56_+_44613471.23-P1P2	DDX56_-_44613091.23-P1P2	GTGGAGGACTCTGAAGCACT	TGTACCCGTGCAGGCCGGCC
DERL2	P1P2	DERL2_-_5389442.23-P1P2	DERL2_+_5389484.23-P1P2	GGTAGGCGCGGCTGACCGGT	CACCGTCGCCTGCCCCACCC
DHODH	P1	DHODH_-_72042714.23-P1	DHODH_-_72042709.23-P1	GGCGAGTGAGCAGTGTGGAT	CACTGCTCACTCGCGGGACC
DHX15	P1P2	DHX15_+_24586128.23-P1P2	DHX15_+_24586112.23-P1P2	GGGTTCCGGCCGCACCGTGT	CCCGCTACTACAGCCCACAC
DHX16	P1P2	DHX16_+_30640731.23-P1P2	DHX16_-_30640796.23-P1P2	GGAAGATCCTAGAGGTCCCA	TTCCGGGCTCCGCGGTACGC
DHX29	P1P2	DHX29_-_54603249.23-P1P2	DHX29_-_54603482.23-P1P2	GGGCTCCCTGGAGCCGGCAG	GGGAATGTGAAGAGCTCTCC
DHX30	P1	DHX30_-_47866553.23-P1	DHX30_-_47866535.23-P1	GGCGGCCGCTAGGAGACTCA	CCATCGTGCTCCCGCCGACC
DHX8	P1P2	DHX8_-_41561378.23-P1P2	DHX8_-_41561447.23-P1P2	GGCTCTGAGCGCCGGCTGTG	ACCCGATTAAGGCTCCCGCC
DIEXF	P1P2	DIEXF_-_210001741.23-P1P2	DIEXF_+_210001559.23-P1P2	GAGGCACGCCCGTTGTGTGG	CGAGTTTGGTCCTCTGGTCC
DIMT1	P1P2	DIMT1_+_61699702.23-P1P2	DIMT1_+_61699666.23-P1P2	GTCCGGCGCTTGGGCCAGAG	CCACGTGGGGATCGCCGCCC
DKC1	P1P2	DKC1_-_153991174.23-P1P2	DKC1_-_153991190.23-P1P2	GGCGCGGCCTGACGGGACCA	CAGACTCCCGCCGCCTTGGC
DLD	P1P2	DLD_-_107531642.23-P1P2	DLD_-_107531673.23-P1P2	GGGAGACCTTGGCGGAGCGG	CCAATACTTTCACCTCCGCC
DMAP1	P1P2	DMAP1_-_44679204.23-P1P2	DMAP1_-_44679254.23-P1P2	GCAGCTGCCGGACCCAGGTG	CTTGGATGTTCCTAACGGCC
DNAJA3	P1P2	DNAJA3_+_4475898.23-P1P2	DNAJA3_-_4475855.23-P1P2	GACCACCAGCAACCAGCGTG	CCCGGCTCTAGGTGGGCCTC
DNAJC19	P1P2	DNAJC19_+_180707414.23-P1P2	DNAJC19_+_180707491.23-P1P2	GGGATGAGCCGTGCTCCCGG	AACCTCAAGCACAGGCGCCC
DNTTIP2	P1P2	DNTTIP2_-_94344536.23-P1P2	DNTTIP2_-_94344693.23-P1P2	GAAGCTCGGGTCCTCTCTGT	GATCTGCACGGGCTAAGGCC
DONSON	P1P2	DONSON_-_34960942.23-P1P2	DONSON_+_34960976.23-P1P2	GGAGTAGCCGGGCACCGAAA	TACAGAGACTTCCCGCGCGC
DSN1	P1P2	DSN1_+_35402097.23-P1P2	DSN1_-_35402160.23-P1P2	GGGCGTCCAGGAGTGACCTG	CTTCACCCTGATCAGGGAGC
DUT	P1P2	DUT_+_48624414.23-P1P2	DUT_+_48624411.23-P1P2	GAGGCGAGCGAGGAGACCAC	CCGGTGGTCTCCTCGCTCGC
DYNC1H1	P1P2	DYNC1H1_-_102430947.23-P1P2	DYNC1H1_+_102430877.23-P1P2	GCGGACGGTCCGGCTTCCGG	TTAGGGCGGAGCCGGCTCCC
DYNC1I2	P1P2	DYNC1I2_+_172544557.23-P1P2	DYNC1I2_+_172544609.23-P1P2	GGCCTCTGGAGGGTCGAGAA	ACTGGCTTCTTCCGGACGCC
DYNLRB1	P1	DYNLRB1_-_33104256.23-P1	DYNLRB1_-_33104419.23-P1	GCTACGCGGGGCTACCGGAT	CCCTCAAGTCGGCTGGGGCC
ECT2	P1P2	ECT2_-_172468705.23-P1P2	ECT2_+_172468782.23-P1P2	GCGAGCGGCTCCAGAGCCAA	GGAACTCCCTCGCCGCACCC
EEF2	P1	EEF2_-_3985443.23-P1	EEF2_+_3985431.23-P1	GCGAGTCGCGCCGAGGATGG	AGGATGGCGGCGACGACGGC
EFR3A	P1P2	EFR3A_+_132916562.23-P1P2	EFR3A_+_132916438.23-P1P2	GCGGCCGGCCACTCACGGGT	TTCGCCCTTCGCCTCGTTCC
EFTUD1	P1P2	EFTUD1_+_82554982.23-P1P2	EFTUD1_+_82555000.23-P1P2	GGTGGGTGCGACCCGAGAGA	CACCGAGAGCTTCCGAAAGC
EFTUD2	P1P2	EFTUD2_+_42976772.23-P1P2	EFTUD2_+_42976714.23-P1P2	GGGGGCGGAAGCACGATCTC	CTGACCCGCTTCAACTTACC
EIF2B2	P1P2	EIF2B2_-_75469671.23-P1P2	EIF2B2_-_75469665.23-P1P2	GGTGTGGATTCCGCCGGTGA	GCGGAATCCACACCTGCCAC
EIF2B3	P1P2	EIF2B3_+_45452243.23-P1P2	EIF2B3_+_45452232.23-P1P2	GAGGCGGCGTGGAGATCGCT	CAACCGCTCCCAGCGATCTC
EIF2B4	P1P2	EIF2B4_+_27593168.23-P1P2	EIF2B4_+_27593203.23-P1P2	GCTGAGGGCGATGGCTGCTG	CCGTGGTCACGGAGCCGCCC
EIF2B5	P1P2	EIF2B5_+_183853118.23-P1P2	EIF2B5_+_183853180.23-P1P2	GAGCTGCCACCGCACGCAGT	CTGTAGTGGCGCCGCCTGGC
EIF2S1	P1P2	EIF2S1_-_67827080.23-P1P2	EIF2S1_-_67827085.23-P1P2	GAGCGAAGCGCACGCTGAGG	ATCCTCCTCAGCGTGCGCTC
EIF3A	P1P2	EIF3A_+_120840264.23-P1P2	EIF3A_-_120840234.23-P1P2	GGGCGCGTGGGACCTTACGC	CTAGAGAGTTCGCTGACGCC
EIF3CL	ENST00000380876.4,ENST00000398943.3,ENST00000398944.3	EIF3CL_-_28415135.23-ENST00000380876.4,ENST00000398943.3,ENST00000398944.3	EIF3CL_+_28415115.23-ENST00000380876.4,ENST00000398943.3,ENST00000398944.3	GGCCCGCGAGTCACACCGCA	GCGAGTCACACCGCAGGGCC
EIF3D	P1P2	EIF3D_-_36925159.23-P1P2	EIF3D_+_36925166.23-P1P2	GCGGCCGGGATGGCAACAGA	GGGACCGCGTTAGCAGCAGC
EIF3E	P1P2	EIF3E_+_109260706.23-P1P2	EIF3E_+_109260697.23-P1P2	GGGTTCCTGGACGGACACTA	GAAGATCCTTAGTGTCCGTC
EIF3G	P1P2	EIF3G_-_10230368.23-P1P2	EIF3G_-_10230310.23-P1P2	GCCACCTGGTCGGCCCAACT	GGGTATTCGCGGCCAGGCCC
EIF3H	P1P2	EIF3H_-_117768013.23-P1P2	EIF3H_+_117768010.23-P1P2	GGAAGAGGTGGCAGTAGAGC	GTACCTTCCTTGCGGGACGC
EIF3M	P1P2	EIF3M_-_32605424.23-P1P2	EIF3M_-_32605405.23-P1P2	GTGGAGTGTCCGCTGTGCCC	CTCGCAAGACCACGCCGACC
EIF4E	P1P2	EIF4E_-_99850247.23-P1P2	EIF4E_+_99849961.23-P1P2	GGGCCAAAGGCAATACTCAC	CCCTGTAGACACCTCGCGGC
EIF4G1	P1P2	EIF4G1_-_184032400.23-P1P2	EIF4G1_-_184032787.23-P1P2	GCTGTGCGGGGAGCCGGAAA	TGGTGCCTGCGCCCGTGGGC
EIF4G2	P1	EIF4G2_+_10830441.23-P1	EIF4G2_+_10830444.23-P1	GAGTCGGAGCTCTATGGAGG	CCATAGAGCTCCGACTCACC
EIF5B	P1P2	EIF5B_-_99953906.23-P1P2	EIF5B_-_99953921.23-P1P2	GGTGGAGAGCCGGGTGCGAG	CTCGTGCTGCCGCCGCTCGC
EIF6	P1P2	EIF6_+_33872338.23-P1P2	EIF6_-_33872571.23-P1P2	GGACGGAGGCCGGGATACTT	AGGTACAGTCGCCGCGTGCC
ELP4	P1P2	ELP4_+_31531362.23-P1P2	ELP4_-_31531374.23-P1P2	GACTGCAGACCCAGTACTCG	GTACTCGCGGCAACACTACC
EMG1	P1P2	EMG1_-_7080134.23-P1P2	EMG1_+_7080302.23-P1P2	GCCTCGTGAACGAAGCGGTG	TGGAATGAGGGTAAGGGGCC
EP400	P1P2	EP400_+_132434542.23-P1P2	EP400_-_132434629.23-P1P2	GCGCTCCGGCCGCGTCAGGA	TCCCGAGAGCCTCCCGCCCC
ERCC2	P1P2	ERCC2_+_45873806.23-P1P2	ERCC2_+_45873802.23-P1P2	GTCGACCCCGCTGCACAGTC	GCCGGACTGTGCAGCGGGGC
ERH	P1P2	ERH_+_69864980.23-P1P2	ERH_-_69864782.23-P1P2	GCGTGTAACGGCGGCGGTGT	GACTCTAGGCCTCGGAGCCC
ESF1	P1	ESF1_+_13765535.23-P1	ESF1_+_13765524.23-P1	GGCCCCACGTGAGGCTTGGT	TCCGCAGTCCTACCAAGCCC
ESPL1	P1P2	ESPL1_-_53662296.23-P1P2	ESPL1_-_53662083.23-P1P2	GGACTGCCCCGGGCCGCTGA	TCGTTTTCCGCGCCAGACCC
EXOC4	P1P2	EXOC4_+_132937814.23-P1P2	EXOC4_-_132937863.23-P1P2	GTAGGCTCCAAGGAAGCCAA	CCATCTTGGACGCGGGGAGC
EXOSC2	P1P2	EXOSC2_-_133569408.23-P1P2	EXOSC2_+_133569139.23-P1P2	GTAACTCCCCGCGGGACCCA	GACTGAGCTGCGCCTGCGCC
EXOSC3	P1P2	EXOSC3_+_37785000.23-P1P2	EXOSC3_-_37785046.23-P1P2	GTCGCGGCTGAATCTCTCGC	GCGATGGCCGAACCTGCGTC
EXOSC4	P1P2	EXOSC4_-_145133639.23-P1P2	EXOSC4_+_145133666.23-P1P2	GGCGGCCGGGCAGCATGGCG	GGTGGACGGGCGGCGCGCCC
EXOSC5	P1P2	EXOSC5_+_41903223.23-P1P2	EXOSC5_-_41903252.23-P1P2	GGGGCTCGGCGCGATGGAGG	CACGTGGGCTCGGCGCGATC
EXOSC6	P1P2	EXOSC6_-_70285645.23-P1P2	EXOSC6_+_70285829.23-P1P2	GGTGCCTCCCGCCTCCAGGT	CCCAACGCCCTGCCGCATCC
FARSB	P1P2	FARSB_-_223520722.23-P1P2	FARSB_-_223520739.23-P1P2	GGCGTAGGGCCCAACGTATA	ACAGTGAGTGGCGGCCCTAC
FBL	P1P2	FBL_-_40336975.23-P1P2	FBL_+_40336946.23-P1P2	GTGTGCGGCTCCGGAGTCCG	TGGTTTGTGCGGCTCCGGAC
FCF1	P1P2	FCF1_-_75179927.23-P1P2	FCF1_+_75179898.23-P1P2	GAGAGAAGACGGTCCAAGAA	TGGTGAGAGAAGACGGTCCC
FDPS	P1P2	FDPS_+_155278669.23-P1P2	FDPS_-_155278687.23-P1P2	GGCTCCGCGATCGGCTCTGT	CGATCGGCTCTGTGGGTCGC
FH	P1P2	FH_-_241683023.23-P1P2	FH_-_241682625.23-P1P2	GAGCCGAAGTGCTCGGTACA	CCTCGGAGCCGTCCGTGGCC
FIP1L1	P1P2	FIP1L1_+_54243867.23-P1P2	FIP1L1_+_54244179.23-P1P2	GAGCTCGAGACTCCAATCCC	CTTCGGGCCTCTGGTTGGGC
FTSJ3	P1P2	FTSJ3_+_61904432.23-P1P2	FTSJ3_+_61904393.23-P1P2	GACTTGTGCGGTTCCAAGTG	CTCTCCGCACACTACCTAGC
GART	P1P2	GART_+_34914420.23-P1P2	GART_+_34914375.23-P1P2	GGTCCCGCGCCGGTCCCGGT	GGTGGCCACCTGGTTCCCGC
GATA1	P1P2	GATA1_+_48644988.23-P1P2	GATA1_-_48645022.23-P1P2	GGCAAGCTCAGTGTGATCCC	TGGGGATGTGGCAAGCTCAC
GBF1	P1P2	GBF1_-_104005325.23-P1P2	GBF1_+_104005335.23-P1P2	GAGCTGACAGGGAAGGTACC	TCCCGGACGACTCATCCTGC
GEMIN2	P1P2	GEMIN2_-_39583560.23-P1P2	GEMIN2_-_39583572.23-P1P2	GACCATGGCGTGGGTACCAG	CTGCGGACTCCGCTGGTACC
GEMIN5	P1P2	GEMIN5_+_154317734.23-P1P2	GEMIN5_+_154317730.23-P1P2	GTAAGGCGTGAGGCTACGAG	ACCGCTCGTAGCCTCACGCC
GFER	P1P2	GFER_-_2034253.23-P1P2	GFER_-_2034422.23-P1P2	GGCGAGCGGGGCCGCTTCCA	CCGGGAGGCGTCCTCGGCGC
GFM1	P1P2	GFM1_-_158362387.23-P1P2	GFM1_+_158362390.23-P1P2	GACCGGCAGCTGAACCCACC	CGGGACTTTGACGCGTGCTC
GINS1	P1P2	GINS1_-_25388381.23-P1P2	GINS1_+_25388562.23-P1P2	GGACTAGAACGAAAGGAGTG	GCGTTGGGCCCTGGGCTCTC
GIT2	P1P2	GIT2_-_110433753.23-P1P2	GIT2_+_110433842.23-P1P2	GTGGCCTAGGACGGAGGGAA	CCCCAAGGCCGCCCAGGGAC
GNE	P1P2	GNE_+_36258410.23-P1P2	GNE_-_36258191.23-P1P2	GCCCGAGCGCGGAAACCGAG	ACACTGGACCCGGCTCTCGC
GNL2	P1P2	GNL2_+_38061508.23-P1P2	GNL2_+_38061333.23-P1P2	GGGTCCGGCGTGGTTCAGGC	TCGATCAGCCCTGCCGCCTC
GNL3L	P1P2	GNL3L_+_54556690.23-P1P2	GNL3L_+_54556706.23-P1P2	GCGAGGGCAACACGACAACT	TCGCTTCTCAGATCCCCGCC
GNPAT	P1P2	GNPAT_-_231376974.23-P1P2	GNPAT_+_231377015.23-P1P2	GGCTTCCGTCCTGGCTGAGA	CCCTAGGCGAAGTAGGGCCC
GOLT1B	P1P2	GOLT1B_+_21654765.23-P1P2	GOLT1B_+_21654809.23-P1P2	GTGAAGCCGGGAAACAGCCC	TGGGCTTTCCGAGGTGCTGC
GPN2	P1P2	GPN2_-_27216692.23-P1P2	GPN2_-_27216715.23-P1P2	GCCCAGTACGTATACCTCGT	GAGGCGAGTGACGCTGGCCC
GPN3	P1P2	GPN3_-_110906004.23-P1P2	GPN3_+_110906029.23-P1P2	GTGACCAGCTGCGCATACCG	CACTCCCTTAGCCTTCGCGC
GTF2B	P1P2	GTF2B_-_89357167.23-P1P2	GTF2B_-_89357171.23-P1P2	GCTCGGCGGGACATACTAAC	GCCGGTTAGTATGTCCCGCC
GTF2E1	P1P2	GTF2E1_-_120461818.23-P1P2	GTF2E1_+_120461660.23-P1P2	GGCGGCCCGTGTGCGACCTC	TGTTCGGAGTTCCCTGGCCC
GTF2H4	P1P2	GTF2H4_-_30876180.23-P1P2	GTF2H4_-_30876185.23-P1P2	GGCGAGGAGGATCGACAGAG	CACCACTCTGTCGATCCTCC
GUCD1	P1P2	GUCD1_-_24951865.23-P1P2	GUCD1_-_24951897.23-P1P2	GGCCGGCAGGCGGAGTGAGG	CAGTGTTGAGCGCGGTCTCC
HARS	P1P2	HARS_+_140070923.23-P1P2	HARS_+_140070910.23-P1P2	GAGGCTGGGGCAACCACCGC	GCTGTCTCGACCTGCGGTGC
HAUS1	P1P2	HAUS1_-_43684365.23-P1P2	HAUS1_+_43684369.23-P1P2	GGGAGTTCCTAGTAAAGTGG	CAGCTATGGAGCCGCAGGAC
HAUS4	P1P2	HAUS4_-_23426310.23-P1P2	HAUS4_+_23426073.23-P1P2	GAAGCTGAAAGGCCCGGGAA	AGAGCTCCTCTTCCCCGAAC
HAUS5	P1P2	HAUS5_-_36103661.23-P1P2	HAUS5_-_36103753.23-P1P2	GGCGGGCGCCACACTTGAAG	CCATCTCTTCGACCGCCCAC
HAUS7	P1	HAUS7_+_152736011.23-P1	HAUS7_+_152735963.23-P1	GCGGCTCGGAGCGCGAAACA	CTGAGTAGTCGTCGCCGCCC
HBS1L	P1P2	HBS1L_-_135376018.23-P1P2	HBS1L_+_135375911.23-P1P2	GGCGCGACGGCAATGCCTCA	GGAGAACCCCTATGCGCCAC
HCCS	P1P2	HCCS_-_11129472.23-P1P2	HCCS_-_11129457.23-P1P2	GACAGCGGTGACCGAGTGAG	CTGTGGCTGCGGTCACCGCC
HEATR1	P1P2	HEATR1_-_236767868.23-P1P2	HEATR1_+_236767776.23-P1P2	GGGCGCTACGGCAAGTGAAG	CATGGTACCAAGGAGCCCAC
HINFP	P1P2	HINFP_-_118992311.23-P1P2	HINFP_-_118992315.23-P1P2	GCCTCTCCGGAGATGGTCTG	ACCTCAGACCATCTCCGGAC
HJURP	P1P2	HJURP_+_234762977.23-P1P2	HJURP_+_234763174.23-P1P2	GAGGCCTGCGTGTCGGAGTG	GACTGCAGGGCCTCGCGCGC
HMGCS1	P1P2	HMGCS1_-_43313473.23-P1P2	HMGCS1_-_43313515.23-P1P2	GCTCACCAAGCGTGACCGAG	CGGACTGTCCTTTCGTGGCC
HSD17B10	P1P2	HSD17B10_-_53461314.23-P1P2	HSD17B10_+_53461288.23-P1P2	GTTGTCGCCGGCCACTCCAC	TCTTGTCGCCGGCCACTCCC
HSD17B12	P1P2	HSD17B12_+_43702645.23-P1P2	HSD17B12_+_43702292.23-P1P2	GGCACAGGAGCCTGAGAAAG	CACCGTCACGGCCGGCGCCC
HSPA9	P1P2	HSPA9_-_137911079.23-P1P2	HSPA9_-_137911031.23-P1P2	GGAGCTGCGCGATGCGGTGG	CGTACTCCTCCATTTATCCC
HSPE1	P1P2	HSPE1_-_198365117.23-P1P2	HSPE1_+_198365089.23-P1P2	GCGGACTGCGAGTCTCTTTG	GGGCCGGACTGCGAGTCTCC
HSPE1-MOB4	P1P2	HSPE1-MOB4_-_198365117.23-P1P2	HSPE1-MOB4_+_198365089.23-P1P2	GCGGACTGCGAGTCTCTTTG	GGGCCGGACTGCGAGTCTCC
IARS2	P1P2	IARS2_-_220267547.23-P1P2	IARS2_-_220267478.23-P1P2	GCGGAGGACCCCGCTCTCAG	AGTAAGAGGGCGCACGCGCC
ICT1	P1P2	ICT1_-_73008809.23-P1P2	ICT1_-_73008831.23-P1P2	GCCACCAGGTGCCTGCGCTG	GACTCCGGCTCGGCTCAGGC
IK	P1	IK_-_140027683.23-P1	IK_-_140027453.23-P1	GAGCCACAGGGTCCTAAGTG	ACAGCAACACCGCAGCGACC
IMMT	P1P2	IMMT_-_86422566.23-P1P2	IMMT_-_86422569.23-P1P2	GCGCGGCGGCGCGAGTTAAG	CCACTTAACTCGCGCCGCCC
IMP3	P1P2	IMP3_+_75932082.23-P1P2	IMP3_+_75932526.23-P1P2	GGTACGCGTGGGCCCTGACG	CAGGACCCGAAGCTGAGAGC
IMP4	P1P2	IMP4_+_131100464.23-P1P2	IMP4_-_131100490.23-P1P2	GTGGGTCCGGGAGAATCTGT	CGTGGGTCCGGGAGAATCTC
IMPDH2	P1P2	IMPDH2_+_49066798.23-P1P2	IMPDH2_+_49066801.23-P1P2	GGGTCCTCGGAGACACGCGG	CGTGTCTCCGAGGACCGCGC
INCENP	P1P2	INCENP_+_61891506.23-P1P2	INCENP_+_61891519.23-P1P2	GCCGCACGGGAGGAGCAACC	GTGCGGTGAGTCCCGAAGGC
INTS2	P1P2	INTS2_-_60005353.23-P1P2	INTS2_-_60004971.23-P1P2	GCGTACTGGTCTGAGAGGAA	TGTCGGAGCCTGGCCAGACC
INTS3	P1P2	INTS3_+_153700546.23-P1P2	INTS3_+_153700541.23-P1P2	GCACACAGAAGCGGCCATAG	TTCCACTATGGCCGCTTCTC
INTS4	P1P2	INTS4_-_77705700.23-P1P2	INTS4_+_77705685.23-P1P2	GGCGCCGCCATGCCTACCCG	TGCCTACCCGCGGGCCCTCC
INTS8	P1P2	INTS8_+_95835564.23-P1P2	INTS8_+_95835490.23-P1P2	GGGGGTATGCGGAACCCGGT	CAGCTCCGGCTGGCCCGCGC
IPO13	P1P2	IPO13_-_44412643.23-P1P2	IPO13_-_44412713.23-P1P2	GCTTGTCTTGTCAGTCACTG	TTCCGTTCGGCCTGGCCCGC
KANSL2	P1P2	KANSL2_+_49076009.23-P1P2	KANSL2_+_49075987.23-P1P2	GCGCTGGCGCCACTAGAGAA	CACTCTGCCGCGCCGCTCGC
KANSL3	P1P2	KANSL3_+_97304019.23-P1P2	KANSL3_+_97304003.23-P1P2	GGCGCGCGGCCGTAAGACCG	ACGCTGCTCTCACCCGCGGC
KCTD10	P1P2	KCTD10_-_109915112.23-P1P2	KCTD10_+_109915092.23-P1P2	GTCCAAACCCGGACTGAGAG	AACCCGGACTGAGAGAGGCC
KIF11	P1P2	KIF11_-_94352971.23-P1P2	KIF11_-_94353041.23-P1P2	GACGCCACGGCCAGAGTACC	TGGTCCCTCTCGGGCGCTGC
KIF23	P1P2	KIF23_+_69707149.23-P1P2	KIF23_+_69706676.23-P1P2	GGGCAGCCAGCGAGGGAGAA	CCGGCTTCGCAGAGCACCGC
KRR1	P1P2	KRR1_+_75905342.23-P1P2	KRR1_+_75905291.23-P1P2	GCGCTGGAGCGGCCAGAAAA	TGGTTCTCCGGCTTCGGCTC
LEO1	P1P2	LEO1_+_52263963.23-P1P2	LEO1_+_52263938.23-P1P2	GCGGGAGCTGCCCCTAACCG	TTATCGCTCACGTCCGCTGC
LIN52	P1P2	LIN52_-_74551706.23-P1P2	LIN52_+_74551686.23-P1P2	GTCCCACAGACGGTAAGAGC	ACAGACGGTAAGAGCCGGCC
LONP1	P1P2	LONP1_+_5720108.23-P1P2	LONP1_+_5720103.23-P1P2	GCTGGCTACGTGCGACTGTG	CTCCCCACAGTCGCACGTAC
LRPPRC	P1P2	LRPPRC_+_44223082.23-P1P2	LRPPRC_-_44223078.23-P1P2	GTGCGGGGACGTTCGAGCAA	TGCTGAGATCCGCGCGTTGC
LSM2	P1P2	LSM2_-_31774578.23-P1P2	LSM2_-_31774687.23-P1P2	GGCCGGACCGGGAAGACAGC	GTCAGCGCTTGGAGCTTTCC
LSM4	P1P2	LSM4_+_18433820.23-P1P2	LSM4_+_18433795.23-P1P2	GCCCGCCGGCACCATGGTGA	GTGAGACCCCGCAGTTGCCC
LSM6	P1P2	LSM6_-_147096913.23-P1P2	LSM6_+_147096955.23-P1P2	GTGGCTGGGATCATCCGCGG	GCGAGGTGAGCCGCACCGCC
LSM7	P1P2	LSM7_+_2328561.23-P1P2	LSM7_-_2328534.23-P1P2	GGCCACACGGCGCGACAAGA	GGGGGCGTGGAGCTCGGGCC
LTV1	P1P2	LTV1_+_144164581.23-P1P2	LTV1_+_144164541.23-P1P2	GGCGGCGCTCACCCCCAACA	TGGTCTCCCCGCCGGACTTC
MAK16	P1P2	MAK16_-_33342733.23-P1P2	MAK16_+_33342750.23-P1P2	GGCCGCGGACACCATGCAGT	GTTGTTCTTACACCCGGGGC
MCM10	P1P2	MCM10_-_13203599.23-P1P2	MCM10_-_13203591.23-P1P2	GGTGAACGAAGAAGGCGTCC	TCTTCGTTCACAGCTGAACC
MCM2	P1P2	MCM2_-_127317301.23-P1P2	MCM2_-_127317286.23-P1P2	GGTAGTGGCGGAGAGGATCG	CTACAGCAACAACCAGGTTC
MCM3	P1P2	MCM3_-_52149354.23-P1P2	MCM3_-_52149307.23-P1P2	GGGCCGGGCCGCGTCCGCAG	GACCGTGTGCCGCAGCGGAC
MCM4	P1P2	MCM4_+_48873564.23-P1P2	MCM4_-_48873574.23-P1P2	GGCGCGCGGTTACCGTGGAA	TGGAAAGGCGGCCGCTTGCC
MCM6	P1P2	MCM6_+_136633947.23-P1P2	MCM6_+_136633964.23-P1P2	GCGTGGCGCAGGCGAATCCT	CGCTCGACCGCCACAAGTCC
MDN1	P1P2	MDN1_-_90529439.23-P1P2	MDN1_+_90529477.23-P1P2	GGCAACTACGCCCGCAGGAA	CACGTGGGTGAGCACACGGC
MED1	P1P2	MED1_-_37607477.23-P1P2	MED1_-_37607464.23-P1P2	GCCCCGGCGGCAAGAAGAGA	CCGGGGACTTCAGATTGATC
MED12	P1P2	MED12_+_70338552.23-P1P2	MED12_-_70338823.23-P1P2	GGCAGGGCCAGGCTGACTGG	CCTTTCGGGACTTTTGCTCC
MED14	P1P2	MED14_+_40594762.23-P1P2	MED14_+_40594765.23-P1P2	GGCGGCCCGGCGGTAGGCGG	CCTACCGCCGGGCCGCCTCC
MED17	P1P2	MED17_-_93517476.23-P1P2	MED17_-_93517872.23-P1P2	GTCCGAAAGACTTACCGAGG	TCGGTCCCCGCCGCCTCCTC
MED18	P1P2	MED18_-_28655606.23-P1P2	MED18_-_28655598.23-P1P2	GGCTCGGGTAACCGGAGTGC	GTTACCCGAGCCCGGGAAGC
MED19	P1P2	MED19_+_57479662.23-P1P2	MED19_+_57479647.23-P1P2	GAGACACGGAGACAGCGCCG	TCGTACCCTCCGCCCCGGCC
MED21	P1P2	MED21_-_27175714.23-P1P2	MED21_-_27175694.23-P1P2	GGGCGCCACCGCGAACTCGG	CCCGAGAGAGCGCTTTATGC
MED22	P1P2	MED22_+_136214930.23-P1P2	MED22_+_136214779.23-P1P2	GGAGGCTGCGGCGGCTGACT	CAGCGCCCGCACACCAGACC
MED30	P1P2	MED30_-_118533205.23-P1P2	MED30_+_118533025.23-P1P2	GGCCGCCCGGGAAGTCAACA	ACGCTGAGGCCCCACAGCCC
MED31	P1P2	MED31_-_6554743.23-P1P2	MED31_-_6554548.23-P1P2	GCCCTGCCAAGAGTAAGGCC	CCTTGATTGGTTTTCTGCTC
MED6	P1P2	MED6_+_71067331.23-P1P2	MED6_+_71067347.23-P1P2	GTGGCGGCGGTGGATATCCG	CCATAATTCCGAGAGCGTTC
MED7	P1P2	MED7_-_156569591.23-P1P2	MED7_-_156569448.23-P1P2	GGCTCGGCGTCCCAACACGG	TTCCTTCTTCTGGGAGCAGC
MED9	P1P2	MED9_-_17380394.23-P1P2	MED9_+_17380324.23-P1P2	GGCAGCCGGGCGACAGGCGG	GACCTCTGGCTAACCTACCC
METTL16	P1P2	METTL16_+_2415104.23-P1P2	METTL16_+_2415051.23-P1P2	GCGGCTGCTTTAAGATTCTA	CTGAGGCCGAGGTTCCTGCC
METTL17	P1P2	METTL17_-_21458170.23-P1P2	METTL17_-_21458167.23-P1P2	GGCCTCCGGAGCCATGGCGG	CCATGGCTCCGGAGGCGAAC
MFAP1	P1P2	MFAP1_+_44116853.23-P1P2	MFAP1_-_44116904.23-P1P2	GCTGTGTTCGCGGACTCAGG	TAAGTAGTTTCTCTATCAGC
MINOS1	P1P2	MINOS1_+_19923571.23-P1P2	MINOS1_-_19923558.23-P1P2	GGACCGCATCCGCCAGACAC	AGCTCCGACTCAGACATGTC
MINOS1-NBL1	P1P2	MINOS1-NBL1_+_19923571.23-P1P2	MINOS1-NBL1_-_19923558.23-P1P2	GGACCGCATCCGCCAGACAC	AGCTCCGACTCAGACATGTC
MIS12	P1P2	MIS12_+_5389906.23-P1P2	MIS12_+_5389910.23-P1P2	GCAGGGACAGACGGCGCGGT	CGCCGTCTGTCCCTGGCAAC
MIS18A	P1P2	MIS18A_+_33651127.23-P1P2	MIS18A_+_33651321.23-P1P2	GGTCGGTGGCCGACATGGAG	TTACCTACAAATCGCCCGCC
MIS18BP1	P1P2	MIS18BP1_+_45722381.23-P1P2	MIS18BP1_+_45722332.23-P1P2	GGTGTTAGAGAACGTCGCGG	CGGTGTATCCTGCCCGCGGC
MKI67IP	P1P2	MKI67IP_+_122494437.23-P1P2	MKI67IP_+_122494255.23-P1P2	GAGCGCCGCGTGGTTAGCGT	CAGATACCCTCTAGACCCGC
MMS22L	P1P2	MMS22L_+_97730632.23-P1P2	MMS22L_-_97730942.23-P1P2	GGCTGCAGAGCCCGACTTAG	CGGGTCCTTGCTGCAGCCGC
MNAT1	P1P2	MNAT1_+_61201445.23-P1P2	MNAT1_-_61201528.23-P1P2	GTCCCTTCGCGAAAGAGCAC	ACAAGCCCCCTCAGACGCGC
MRP63	P1P2	MRP63_+_21750803.23-P1P2	MRP63_-_21750808.23-P1P2	GCGGCCGCCAGCAGACGCCG	TGGCGTAAGCGCACCCGTCC
MRPL10	P1P2	MRPL10_-_45908914.23-P1P2	MRPL10_-_45908834.23-P1P2	GGACGGAAGCCGAGTGGAGA	CAGGCGGGTAAGGAGTGGCC
MRPL13	P1P2	MRPL13_+_121457360.23-P1P2	MRPL13_+_121457352.23-P1P2	GCGGCGTGGCTACTAGGAGA	TACGTCCTTCTCCTAGTAGC
MRPL16	P1P2	MRPL16_-_59578202.23-P1P2	MRPL16_+_59578187.23-P1P2	GCCTGCACCCAGGTAAGCAG	AGGTAAGCAGCGGCGCTCCC
MRPL17	P1P2	MRPL17_+_6704492.23-P1P2	MRPL17_-_6704339.23-P1P2	GTCGCTGCAGCGATCTCCCA	TCTTGTCCACTCTGCGGGTC
MRPL18	P1P2	MRPL18_-_160211509.23-P1P2	MRPL18_-_160211527.23-P1P2	GGTCTGGCGTGGAGAGTTTG	TTGGCTGCTGTAGATCCCCC
MRPL19	P1P2	MRPL19_+_75874011.23-P1P2	MRPL19_+_75874356.23-P1P2	GAGGCGATAGAGGCCGGCGG	TGGCGCTAGGCCGGCAACTC
MRPL21	P1P2	MRPL21_+_68671245.23-P1P2	MRPL21_-_68671264.23-P1P2	GTTCCCTGACGGTCACCTTA	TGACGGTCACCTTAGGGCGC
MRPL22	P1P2	MRPL22_-_154320698.23-P1P2	MRPL22_-_154320643.23-P1P2	GCGGCAGTACTGGGACAGTT	AGTTCAAGCGCCTTCTGGAC
MRPL3	P1P2	MRPL3_+_131221797.23-P1P2	MRPL3_+_131221782.23-P1P2	GCGTCGCAGAGAGCATCGGC	CCGGAACGGTCGCCGGCCGC
MRPL33	P1P2	MRPL33_-_27994638.23-P1P2	MRPL33_+_27994628.23-P1P2	GGACGGAGACTGCCCAGGTG	AGGTGTGGTCACCATGTTCC
MRPL34	P1P2	MRPL34_-_17416686.23-P1P2	MRPL34_+_17416659.23-P1P2	GTCGCCCGCAGCCGGTACTG	GAATCGCCCGCAGCCGGTAC
MRPL35	P1P2	MRPL35_+_86426814.23-P1P2	MRPL35_-_86426601.23-P1P2	GGAGTCGGGGGACTTGGTAC	ACGGCGGCCGCTTTGGGTTC
MRPL36	P1P2	MRPL36_+_1799909.23-P1P2	MRPL36_+_1799899.23-P1P2	GGGCGCCGGGTGAGAGCGTG	TACCCGGCCGCACGCTCTCC
MRPL37	P1P2	MRPL37_-_54665902.23-P1P2	MRPL37_-_54665919.23-P1P2	GGGTCCAGGTGGAGGTCTTG	TACCGATCTGATAGCCTCAC
MRPL39	P1P2	MRPL39_+_26979780.23-P1P2	MRPL39_+_26979728.23-P1P2	GGTTCTCACCGCTGCTATGG	CCGGGTGCGACCAGCCAGAC
MRPL41	P1P2	MRPL41_-_140446382.23-P1P2	MRPL41_-_140446416.23-P1P2	GAGCAAGGTCGAGGCCGGGT	ACACGAGCTCCAAGCGGCCC
MRPL43	P1P2	MRPL43_+_102747000.23-P1P2	MRPL43_-_102747237.23-P1P2	GTGGCAACGACTCCCCGGGT	CGCTGCTTAGGCTCCGCGGC
MRPL46	P1P2	MRPL46_+_89010571.23-P1P2	MRPL46_+_89010587.23-P1P2	GAGGCGGACGCTGTTAGGGG	CCTTACGGGCGCCGCCATCC
MRPL51	P1P2	MRPL51_+_6602410.23-P1P2	MRPL51_-_6602409.23-P1P2	GGCCCACAGCTGCCTGGGTA	AAGATGGCTGTCTTCGCCTC
MRPL55	P1P2	MRPL55_-_228296929.23-P1P2	MRPL55_-_228296953.23-P1P2	GCCCGGTGGAACTAAGACCA	TGATCTCCTGCGTGGCCTCC
MRPS11	P1P2	MRPS11_-_89010934.23-P1P2	MRPS11_-_89010986.23-P1P2	GCTGCAGACGGAAACTGACT	CAGGAACCGCGACCCCGCGC
MRPS12	P1P2	MRPS12_+_39421616.23-P1P2	MRPS12_-_39421628.23-P1P2	GCTCACAGGACCTAAAGGTG	AAAGGTGAGGTCGCGGACAC
MRPS14	P1P2	MRPS14_+_174992540.23-P1P2	MRPS14_-_174992444.23-P1P2	GTAGTTTGTAGCGGACAACA	CGGGTCCCCCACGGCTCTGC
MRPS17	P1P2	MRPS17_-_56019620.23-P1P2	MRPS17_-_56019638.23-P1P2	GGGTGGCTGCATAGTCTTGG	CCACGAGACTCACCTCCGCC
MRPS2	P1P2	MRPS2_+_138392554.23-P1P2	MRPS2_-_138392571.23-P1P2	GGCGGCCGAGGATGTCGCCA	AGGATGTCGCCATGGCTGGC
MRPS21	P1P2	MRPS21_-_150266318.23-P1P2	MRPS21_-_150266323.23-P1P2	GGCTAGGTACTGAGCGCGCG	CACCTCGCGCGCTCAGTACC
MRPS23	P1P2	MRPS23_+_55927379.23-P1P2	MRPS23_+_55927367.23-P1P2	GGCTAGTCACGCTCGGTACC	TGATCTGCGCCTGGTACCGC
MRPS25	P1P2	MRPS25_+_15106771.23-P1P2	MRPS25_-_15106759.23-P1P2	GAGCCGCGTGAGATCCGCGC	TTCTCGTCGCTGCTCGGCTC
MRPS27	P1P2	MRPS27_+_71616011.23-P1P2	MRPS27_+_71615999.23-P1P2	GGTGCGGCGCGGGATGCTCC	CTTGCCGCGCCAGGAGCATC
MRPS33	P1P2	MRPS33_+_140714704.23-P1P2	MRPS33_-_140714768.23-P1P2	GGGAAGGTCAGGTCTAGGTA	GGTAGAGGGCGGGCCTTCCC
MRPS35	P1P2	MRPS35_+_27863749.23-P1P2	MRPS35_-_27863821.23-P1P2	GCGAGGACGGCAAGCCGGAG	TCGACTGCAGAGACAGCCAC
MRPS5	P1P2	MRPS5_+_95787523.23-P1P2	MRPS5_-_95787353.23-P1P2	GGACTCCAGCATGGCGACCG	CCACCTTCCGCCGGAGCCGC
MRPS9	P1P2	MRPS9_-_105654578.23-P1P2	MRPS9_-_105654556.23-P1P2	GCGCCCTGTGTGTCCTACGG	CCATGTTAGCTGTGGGAGCC
MTHFD1	P1P2	MTHFD1_-_64855062.23-P1P2	MTHFD1_-_64855112.23-P1P2	GGGCCAGTCCCTAAGCACGT	CCAATATCGAGGTTCCACTC
MTOR	P1P2	MTOR_+_11322547.23-P1P2	MTOR_+_11322541.23-P1P2	GGGCAGGGGGCCTGAAGCGG	GTACCGCCGCTTCAGGCCCC
MTPAP	P1P2	MTPAP_-_30638029.23-P1P2	MTPAP_-_30638037.23-P1P2	GGCTGTGGGACGGAACTACA	GTTTGCCCTGTAGTTCCGTC
MYBBP1A	P1P2	MYBBP1A_-_4458722.23-P1P2	MYBBP1A_+_4458615.23-P1P2	GGTTTGTGTCGGCTCGGAGG	TCTCCGCCACACTCACCGAC
MYBL2	P1P2	MYBL2_+_42295803.23-P1P2	MYBL2_-_42295783.23-P1P2	GGGCCCCGGGCCGCGCTCGA	GCGCTCCTCGCTCGCAGGAC
MZT1	P1P2	MZT1_-_73301757.23-P1P2	MZT1_+_73301789.23-P1P2	GCCATGGCTAAGGCCGAGGG	TCCTCTCTCCGAGGCAATCC
NAA38	P1P2	NAA38_+_117824200.23-P1P2	NAA38_-_117824430.23-P1P2	GGAAAGGGCGCGCCAGAACC	TCATCTCCTCGCCCGCCCCC
NARS	P1P2	NARS_+_55288999.23-P1P2	NARS_+_55288993.23-P1P2	GGCACGTTGGAGTCATAAGA	ACGCCGTCTTATGACTCCAC
NBAS	P1P2	NBAS_+_15701228.23-P1P2	NBAS_-_15701467.23-P1P2	GCGTAGCAGGAGCCACGTAG	TAGAGACACTCCTCCGCTGC
NCAPD2	P1P2	NCAPD2_+_6603301.23-P1P2	NCAPD2_-_6603320.23-P1P2	GTACCTGGGGATCTCACCCG	GGGGATCTCACCCGCGGCTC
NCAPH	P1P2	NCAPH_-_97001726.23-P1P2	NCAPH_+_97001557.23-P1P2	GGCCCTGCGGCTGACAGCAG	AGGAAAGATGGGACCTCCCC
NCBP2	P1P2	NCBP2_-_196669400.23-P1P2	NCBP2_+_196669328.23-P1P2	GAGAGAAGCGGACCACAATG	CGTAGGAGTCGCTGCGCAGC
NCL	P1	NCL_-_232329157.23-P1	NCL_-_232329175.23-P1	GCCGCGGGTGCTGAAGATCC	TCGGGTGTACGTGCTCCGGC
NDC80	P1P2	NDC80_-_2571946.23-P1P2	NDC80_-_2571927.23-P1P2	GAGGCTCGGGAGAGGAAACG	CCACTCCTCATCAGTGTCCC
NDNL2	P1P2	NDNL2_-_29561992.23-P1P2	NDNL2_-_29561941.23-P1P2	GGTCGGCGACCCGCTAACGC	GAGTGTGCGCCGGCACCTGC
NDUFAF5	P1P2	NDUFAF5_+_13765753.23-P1P2	NDUFAF5_+_13766054.23-P1P2	GCTGGGACCCTCGCCGCCCA	TGCCTCTTTCGGCCTCTACC
NEDD1	P1P2	NEDD1_-_97301092.23-P1P2	NEDD1_+_97301093.23-P1P2	GCGGAGAGGTGAGGTTCCGG	TGAGGTCAGCGGGCCCCCGC
NEDD8	P1P2	NEDD8_+_24701514.23-P1P2	NEDD8_+_24701539.23-P1P2	GCAGCGGCGACCGGAGCGGT	TCCAGCACTCTTGCCTGCAC
NIP7	P1P2	NIP7_-_69373724.23-P1P2	NIP7_+_69373427.23-P1P2	GGGATCCGGTGTTCCAACCC	ATGGGATAGTCGCCGCGGTC
NKAP	P1P2	NKAP_-_119077682.23-P1P2	NKAP_+_119077637.23-P1P2	GGCGGAACAGCCCAAATCTG	TGGTTCCCGGGACCTGCCGC
NLE1	P1P2	NLE1_-_33469053.23-P1P2	NLE1_+_33469287.23-P1P2	GTGTCCGGGGTGATGTCCAC	CCATCCTGCGTCCCCACGTC
NMD3	P1P2	NMD3_+_160939115.23-P1P2	NMD3_-_160939520.23-P1P2	GGTCCCGTCAGCTGCCAACC	TCTCACCTGGGCTCCAACCC
NOC3L	P1P2	NOC3L_-_96122495.23-P1P2	NOC3L_+_96122658.23-P1P2	GACCACCGCCCCCTAGACAC	GGGAATGACACACGTGCCGC
NOL11	P1P2	NOL11_-_65714052.23-P1P2	NOL11_-_65714041.23-P1P2	GAGTGAGCGCGGCCGTACTT	CGCTCACTCCCGGCAGGCCC
NOL6	P1P2	NOL6_-_33473848.23-P1P2	NOL6_+_33473861.23-P1P2	GGCGCCGGCCCCATCACTCA	CACTTCAGATTCTAGCCGGC
NOP10	P1P2	NOP10_+_34635309.23-P1P2	NOP10_+_34635306.23-P1P2	GCGGACCACTGCAGACTGAG	CCGCTCAGTCTGCAGTGGTC
NOP16	P1P2	NOP16_+_175815576.23-P1P2	NOP16_+_175815510.23-P1P2	GCACGAGGTCTGAGAGACAG	CCGGGTTTTGCCCTTGGCCC
NOP2	P1P2	NOP2_+_6677426.23-P1P2	NOP2_+_6677045.23-P1P2	GGCCGGCCGAAAGCTAGGTC	CCGCTTCTCCTTCGTAGGGC
NOP58	P1P2	NOP58_-_203130738.23-P1P2	NOP58_-_203130504.23-P1P2	GGAGAGCGAGCCGTTAAAGG	CGCTGTACTGGAACTAGGAC
NPAT	P1P2	NPAT_+_108093330.23-P1P2	NPAT_-_108093360.23-P1P2	GGAACCAGGAGATGCGGCGC	CCACTGGAACCAGGAGATGC
NRDE2	P1P2	NRDE2_+_90798262.23-P1P2	NRDE2_+_90798265.23-P1P2	GTCCCTATAGAGAAGAACGG	TTCTTCTCTATAGGGATGGC
NSMCE1	P1P2	NSMCE1_+_27280033.23-P1P2	NSMCE1_-_27280049.23-P1P2	GCGCGGCCTGGGATGCGCTT	GGGATGCGCTTGGGCTCCCC
NSRP1	P1P2	NSRP1_-_28444222.23-P1P2	NSRP1_-_28443902.23-P1P2	GCCCGCTTGGATGCTCTCAG	TAACTCCCGGATCACTCACC
NUBP1	P1P2	NUBP1_-_10837726.23-P1P2	NUBP1_-_10837703.23-P1P2	GGGCAAAGGCGACGGAATGG	TCGTGGTCACCGGAACCCGC
NUDC	P1P2	NUDC_-_27248261.23-P1P2	NUDC_-_27248296.23-P1P2	GGCGGACGACTAGAGTCGTT	GCGCTCTCTACGCTCCTGCC
NUDCD3	P1P2	NUDCD3_+_44530237.23-P1P2	NUDCD3_+_44530211.23-P1P2	GCCAGTCGGCAGGTCTGAGG	AGGTACGCTTCACACACACC
NUDT21	P1P2	NUDT21_+_56485197.23-P1P2	NUDT21_-_56485228.23-P1P2	GGCGGGCAGTAGCCGCTGAG	GTTAATGGCGGGCAGTAGCC
NUF2	P1P2	NUF2_-_163291876.23-P1P2	NUF2_+_163291904.23-P1P2	GGGTGAGCGCGAGAGGACGG	TCCCAAGGCGCGGGCAGGTC
NUP107	P1P2	NUP107_-_69080796.23-P1P2	NUP107_-_69080973.23-P1P2	GGAGCGGGAAGGCTAAAACG	TAGGGGAAGCACCCGGGACC
NUP160	P1P2	NUP160_+_47869833.23-P1P2	NUP160_-_47869693.23-P1P2	GGCCCTGGAACGGAGCTTCG	TGTTTCATCCTCCTGAGTCC
NUP205	P1P2	NUP205_-_135242670.23-P1P2	NUP205_-_135243082.23-P1P2	GGGGCCTCCATGCGGCAGAA	CTGGCTTCACTGTGGAAGAC
NUP54	P1P2	NUP54_+_77069544.23-P1P2	NUP54_+_77069339.23-P1P2	GGTCGCAGGAGTAACCTACT	CTAAAGTCTCCGCGTCGGCC
NUP62	P1P2	NUP62_+_50432696.23-P1P2	NUP62_-_50432220.23-P1P2	GAGGGCCACGAGCTGCGAAA	GGGTCTGGTTTCCTCCTCCC
NUP85	P1P2	NUP85_-_73201818.23-P1P2	NUP85_-_73201846.23-P1P2	GAGGCCTGAGCGGGAAGCAT	CAGGCTCCTAGAAGTCGCTC
NUP88	P1P2	NUP88_+_5322944.23-P1P2	NUP88_+_5322928.23-P1P2	GCGGCCGCCGAGGGACCGGT	CAGCTCGCCGTCGCCCACCC
NUP93	P1P2	NUP93_-_56764101.23-P1P2	NUP93_-_56764129.23-P1P2	GCCTCAAGCCGGCACCTGAG	TTACCTTGTGCTACAGCCGC
NUP98	P1P2	NUP98_+_3818746.23-P1P2	NUP98_-_3818537.23-P1P2	GCGCGCTGCGCCCGAAGCGG	CTTCGAAGTCTAGCGCCGCC
NUPL1	P1P2	NUPL1_+_25875775.23-P1P2	NUPL1_+_25875800.23-P1P2	GGAACTTCCAGCCCCAACGG	GGTCCGTGCCGGGCGAGAGC
NUTM1	P1P2	NUTM1_+_34635309.23-P1P2	NUTM1_+_34635306.23-P1P2	GCGGACCACTGCAGACTGAG	CCGCTCAGTCTGCAGTGGTC
NVL	P1P2	NVL_+_224517846.23-P1P2	NVL_+_224517861.23-P1P2	GGAGCTGGCGGTCCGAGCTG	GCTCCTAGTCAACCGGGGGC
ORAOV1	P1P2	ORAOV1_-_69490100.23-P1P2	ORAOV1_+_69490047.23-P1P2	GAGGCACAAATGCTCCGCTT	CGCGGTGCCGTAGCAGACCC
ORC5	P1P2	ORC5_-_103848433.23-P1P2	ORC5_+_103848420.23-P1P2	GGAGCCTCTCCCGAGTCTGG	GAGTCTGGCGGCCCACGCTC
OXA1L	P1P2	OXA1L_+_23235936.23-P1P2	OXA1L_-_23235932.23-P1P2	GTAGCAAGCGCAGAAGCTCC	CACATTAGTCCCATCGCCAC
PAF1	P1P2	PAF1_+_39881751.23-P1P2	PAF1_-_39881702.23-P1P2	GCGGCCTGAGGAGACCCGTT	CGGTGCTGCCTGCGCGTTCC
PAM16	P1P2	PAM16_-_4401236.23-P1P2	PAM16_+_4401248.23-P1P2	GCCCGACTCGGGGCTCACCA	CCGGGGCTCAAACTCCGACC
PARS2	P1P2	PARS2_+_55230150.23-P1P2	PARS2_+_55230144.23-P1P2	GACGGCGGTGGTCTTGCGGG	ACGCCTCCCGCAAGACCACC
PAXBP1	P1P2	PAXBP1_-_34143986.23-P1P2	PAXBP1_-_34143891.23-P1P2	GGCCTTTCGGAACATCCCCG	CCGTTGTTGCCGCCGCCGGC
PCNA	P1P2	PCNA_+_5100595.23-P1P2	PCNA_-_5100179.23-P1P2	GCGGACGCGGCGGCATTAAA	CCGGTGCTTGGCGGGAGCGC
PDCD11	P1P2	PDCD11_-_105156445.23-P1P2	PDCD11_+_105156425.23-P1P2	GTCCGCGTGTGTGAGTACCG	CGTGTGTGAGTACCGCGGCC
PELO	P1	PELO_-_52095976.23-P1	PELO_+_52096194.23-P1	GGCCAGCGGGAACTGTGTAG	TTGGTTCTGTCAGTGAGCCC
PES1	P1P2	PES1_-_30987859.23-P1P2	PES1_-_30987845.23-P1P2	GCGACTAGGGCCGCGCGTAC	AGTCGGCTCCTCAACGTGGC
PFDN2	P1P2	PFDN2_+_161087799.23-P1P2	PFDN2_+_161087778.23-P1P2	GCGAAGATGGCGGAGAACAG	CTGCTCTTGCCGGCGCGACC
PGK1	P1P2	PGK1_+_77359761.23-P1P2	PGK1_-_77359779.23-P1P2	GCTGCCGACGTGCGCTCCGG	ACGTGCGCTCCGGAGGCTTC
PHAX	P1	PHAX_-_125936670.23-P1	PHAX_-_125936686.23-P1	GGGAAGATGGCGTTGGAGGT	ATCTTCCATATCGCCGACCC
PHB	P1P2	PHB_+_47492231.23-P1P2	PHB_+_47491846.23-P1P2	GAGCTCATGCGCAGTATGTG	CACCGTCGTTGCCCGCTCCC
PHB2	P1P2	PHB2_+_7079788.23-P1P2	PHB2_-_7079816.23-P1P2	GGGCCCGAACCCTCGTGTGA	TACGGGCCCGAACCCTCGTC
PIAS4	P1P2	PIAS4_+_4008092.23-P1P2	PIAS4_+_4007982.23-P1P2	GGGACGGTGCCTCAACCGGG	CACCCAGGTCTTCGCGCCGC
PLK1	P1P2	PLK1_-_23690679.23-P1P2	PLK1_+_23690651.23-P1P2	GAGGGTGAGTGTCGCTGCTG	CCGGAGGGTGAGTGTCGCTC
PLRG1	P1P2	PLRG1_+_155471467.23-P1P2	PLRG1_-_155471485.23-P1P2	GCTGCCGGAGGTGGGATACA	GAGGTGGGATACACGGTAGC
PMF1	P1P2	PMF1_-_156182834.23-P1P2	PMF1_+_156183115.23-P1P2	GAAGCAAGTAGCGCCAATCT	TAGGAGTCAGGGTATTCACC
PMF1-BGLAP	P1P2	PMF1-BGLAP_-_156182834.23-P1P2	PMF1-BGLAP_+_156183115.23-P1P2	GAAGCAAGTAGCGCCAATCT	TAGGAGTCAGGGTATTCACC
PMPCB	P1	PMPCB_+_102937876.23-P1	PMPCB_-_102938097.23-P1	GGAAGGAAGGTAGAGGATGA	ACTGTTCGGATCTGTGGCGC
PNISR	P1	PNISR_+_99873121.23-P1	PNISR_+_99873109.23-P1	GTGGAGAGGTGTTACCGGAA	TTGTCGCCGCCGTTCCGGTC
PNPT1	P1P2	PNPT1_-_55920888.23-P1P2	PNPT1_-_55920565.23-P1P2	GTGAGTGCCCGATCCCGCCG	ACTCTGTCCGTCCACCTGAC
POLD2	P1P2	POLD2_+_44163100.23-P1P2	POLD2_-_44162910.23-P1P2	GGGCGCGCCGCGCGGTGAGT	CCATCAAGCACGTTCGAGCC
POLD3	P1P2	POLD3_+_74303696.23-P1P2	POLD3_-_74303706.23-P1P2	GAAGCTGGTCCGCCATGGTG	TGGTGCGGCAGCGCTGGGAC
POLE	P1P2	POLE_-_133263932.23-P1P2	POLE_+_133263949.23-P1P2	GGCTACCACCTCTGCTTCAG	ACCCAGACTCGCGAGAGCCC
POLG2	P1P2	POLG2_+_62493131.23-P1P2	POLG2_+_62493140.23-P1P2	GACGGTAGTGGTGGCTTGTT	CCACTACCGTTAACAGAATC
POLR1A	P1P2	POLR1A_+_86332623.23-P1P2	POLR1A_+_86332635.23-P1P2	GAAGAGGCCGGTGGTGCTGG	GCCTCTTATCCAGGCAGTCC
POLR1B	P1P2	POLR1B_-_113300081.23-P1P2	POLR1B_+_113300085.23-P1P2	GCAGGTGGCCACATGGATCC	GTGGCGGAACCTGCCCAGCC
POLR1D	P1	POLR1D_+_28196016.23-P1	POLR1D_+_28196036.23-P1	GGGAAGCAAGGACCGACCGA	GCTTCGCCTCCGCGCCTCGC
POLR1E	P1P2	POLR1E_+_37486167.23-P1P2	POLR1E_-_37486076.23-P1P2	GGACAGCTGAGGTACCGAGA	CCTCGCACTCGGCAACACCC
POLR2B	P1P2	POLR2B_+_57845253.23-P1P2	POLR2B_+_57845291.23-P1P2	GGTGCAGCCGGCGCATGGGA	ACACTTACCAGGCCGGGAAC
POLR2C	P1P2	POLR2C_-_57496616.23-P1P2	POLR2C_-_57496602.23-P1P2	GCACCGCGGAGCAGACGCGG	CGGTGACTGCGCGGCGCCAC
POLR2D	P1	POLR2D_-_128615513.23-P1	POLR2D_+_128615628.23-P1	GCTTGCCCAAGCCGCCGCTG	CCTCTACGTCGCCAGCCCGC
POLR2G	P1P2	POLR2G_-_62529086.23-P1P2	POLR2G_+_62529069.23-P1P2	GGATTCCCAGGGACTGTCGG	AGGGACTGTCGGAGGTGTGC
POLR2H	P1P2	POLR2H_-_184081237.23-P1P2	POLR2H_+_184081227.23-P1P2	GGTGCACGTACTCCCAACTG	AACTGTGGTCGCGCTCTCAC
POLR2I	P1P2	POLR2I_+_36605783.23-P1P2	POLR2I_-_36605759.23-P1P2	GGGAGCAAGCGCGGAAGGCT	TGGAGCCCGACGGGACTTAC
POLR2M	P1P2	POLR2M_+_57998958.23-P1P2	POLR2M_-_57999302.23-P1P2	GCTAGCGCCGGATCCGCGGA	CCGTCCACTCGCCCGTAGGC
POLR3A	P1P2	POLR3A_-_79789274.23-P1P2	POLR3A_-_79788928.23-P1P2	GCTCGCCGCTAACACATCTG	CGAGAGGTCCCTGGACTTGC
POLR3B	P1P2	POLR3B_-_106751759.23-P1P2	POLR3B_-_106751930.23-P1P2	GAGGCACGCAGGGAGCGTCA	CTGGGATCAGCCTTCACTCC
POLR3F	P1P2	POLR3F_+_18448087.23-P1P2	POLR3F_-_18448020.23-P1P2	GGCAGCCCGGTAGCAAGCCG	GTCCTTCCTTGCCTTTCGGC
POP5	P1P2	POP5_-_121019190.23-P1P2	POP5_+_121019173.23-P1P2	GGCCTCCGCGCTCTCCGGTC	CGCTCTCCGGTCCGGCGTGC
PPAN	P1P2	PPAN_-_10217084.23-P1P2	PPAN_-_10217074.23-P1P2	GCAGCAGCATGGGACAGTCA	ATGCTGCTGTGTCCTCCACC
PPAN-P2RY11	P1P2	PPAN-P2RY11_-_10217084.23-P1P2	PPAN-P2RY11_-_10217074.23-P1P2	GCAGCAGCATGGGACAGTCA	ATGCTGCTGTGTCCTCCACC
PPIE	P1P2	PPIE_+_40204766.23-P1P2	PPIE_-_40204654.23-P1P2	GTGAGGACAGTGGGAAACCT	TTGGGGGTCGCGTTCACTCC
PRIM1	P1P2	PRIM1_-_57146107.23-P1P2	PRIM1_+_57146097.23-P1P2	GCGCGGAACTCGCCACGGTA	CGGTAAGGATTACCACAGGC
PRIM2	P1P2	PRIM2_+_57182462.23-P1P2	PRIM2_-_57182458.23-P1P2	GCTCGGGAAAACACAAACGG	CTGTTCCCGGGTGGCGGGAC
PRMT5	P1	PRMT5_+_23398566.23-P1	PRMT5_+_23398587.23-P1	GGACAGCGCGAGGAGAAAGA	CGCCGGGATTCCTTGATACC
PRPF18	P1P2	PRPF18_-_13629033.23-P1P2	PRPF18_+_13629281.23-P1P2	GCGCGGCCGCCGGCCCAGTG	CTGGTAGGCCCCCTTAGATC
PRPF19	P1P2	PRPF19_-_60674010.23-P1P2	PRPF19_-_60673960.23-P1P2	GCTAGCGTAGCGCTTCACGT	CGGAGCAGTCCCGGCAGCAC
PRPF3	P1P2	PRPF3_-_150294069.23-P1P2	PRPF3_-_150294051.23-P1P2	GGTGGCCCCGGGCCCACAGA	CTACTCACCTCACAAACTTC
PRPF4	P1P2	PRPF4_-_116037979.23-P1P2	PRPF4_-_116037989.23-P1P2	GCGCGGTGGACGGTCTGAAA	GAACACTCCCTTTCAGACCC
PRPF8	P1P2	PRPF8_+_1588005.23-P1P2	PRPF8_+_1588152.23-P1P2	GTCGGGCCGAGTGACCGAAG	GGAAGTGCGCAACCCGAGTC
PSMA1	P1P2	PSMA1_-_14541640.23-P1P2	PSMA1_+_14541841.23-P1P2	GGCTCCCCGGGAAGCGAAAG	TGGTGGCGGCGCGGGCCTGC
PSMA3	P1P2	PSMA3_-_58711601.23-P1P2	PSMA3_+_58711815.23-P1P2	GGGTATAGGGGAAGCGCTCC	CTATATGCTAGGCCTGCGTC
PSMA4	P1P2	PSMA4_-_78832818.23-P1P2	PSMA4_+_78833014.23-P1P2	GGTTATTCGGTGAGCGGTGG	CCTCTGTGACGGACCGACCC
PSMA5	P1P2	PSMA5_+_109968996.23-P1P2	PSMA5_-_109969028.23-P1P2	GGGTGCCGGTGGAGTCGTGT	GTGAGTTGGGTGCCGGTGGC
PSMB2	P1P2	PSMB2_+_36107087.23-P1P2	PSMB2_+_36107080.23-P1P2	GCTGTCTCACCGGTGAGACC	GCTTCCAGGTCTCACCGGTC
PSMB5	P1P2	PSMB5_+_23504053.23-P1P2	PSMB5_-_23504062.23-P1P2	GGTGTTGGAGAGACCGCTAC	CTACCGGTGAACCAGCGCGC
PSMB6	P1	PSMB6_-_4699534.23-P1	PSMB6_-_4699495.23-P1	GCGGGGAGCCGGGCCAGCAC	CCATCTTTCTCCTCCGGTAC
PSMB7	P1P2	PSMB7_-_127177679.23-P1P2	PSMB7_+_127177501.23-P1P2	GAAGAGAAGCCTCCAACTGG	CTGAGTCACACTAGCCGCGC
PSMC1	P1P2	PSMC1_-_90722958.23-P1P2	PSMC1_-_90723020.23-P1P2	GCAAGATGGTGAGTGACTAA	CTTTCTCTCGCCTCAGGCTC
PSMC2	P1P2	PSMC2_-_102988187.23-P1P2	PSMC2_-_102988137.23-P1P2	GTTACCTCGGTGCCGATCAG	CTCCTTAATGATTACACAGC
PSMC4	P1P2	PSMC4_-_40477112.23-P1P2	PSMC4_-_40477115.23-P1P2	GGAGGCCGGCTTGGTCACTA	CCATAGTGACCAAGCCGGCC
PSMD1	P1P2	PSMD1_-_231921650.23-P1P2	PSMD1_+_231921605.23-P1P2	GGCGCACCCGGGGAGCAAGG	GAGGAGGCGACTGACTGAGC
PSMD12	P1P2	PSMD12_+_65362663.23-P1P2	PSMD12_+_65362472.23-P1P2	GCGAGTGGTGGCCGAAGCAG	CGCCGTGACTCAGCCCCTGC
PSMD2	P1P2	PSMD2_+_184017068.23-P1P2	PSMD2_+_184017090.23-P1P2	GCTGCACCGGCGCCTTGTCC	CAGCAGTCTCCAGCGGCGGC
PSMD4	P1P2	PSMD4_-_151227239.23-P1P2	PSMD4_-_151227302.23-P1P2	GCCGTCCCGGAGACCCGGTC	CGAAGTAGCTCCTCACCACC
PSMD6	P1P2	PSMD6_+_64009073.23-P1P2	PSMD6_-_64009133.23-P1P2	GATGCCGCTGGAGAACCTGG	AGTTGTGTCCTGTCAGCCGC
PSMD7	P1P2	PSMD7_-_74330744.23-P1P2	PSMD7_+_74330741.23-P1P2	GACTGGGCCTGAAAGGGTAC	GTGACCGCTACTGCTGCCGC
PSPH	P2	PSPH_-_56119277.23-P2	PSPH_-_56119094.23-P2	GAGCTCCAACGCCGGAACCA	TGGGGCCACACGCGAGTCTC
PTCD3	P1P2	PTCD3_-_86333438.23-P1P2	PTCD3_+_86333424.23-P1P2	GTGGCCAGCCGCTGACGGGT	CTGACGGGTCGGCGGGCGGC
PTTG1	P1P2	PTTG1_-_159848867.23-P1P2	PTTG1_-_159848943.23-P1P2	GGCGCCGCGTCCGTTCACCG	GAGCCGGCTCAACTAACCAC
QARS	P1P2	QARS_-_49142149.23-P1P2	QARS_-_49142355.23-P1P2	GAGGCTAGTGAAGAGCGACA	CCGGAAAGGCCGGTTTGTCC
RABGGTB	P1P2	RABGGTB_+_76251918.23-P1P2	RABGGTB_-_76252008.23-P1P2	GAGAGAGCAGGGTCAGTTCC	TGTCTGCTACCAACCCATCC
RACGAP1	P1P2	RACGAP1_-_50419239.23-P1P2	RACGAP1_+_50419209.23-P1P2	GCGCTCCGCGCCTCACCCAA	TCACTTCGCTCCGCGCCTCC
RAD51	P1P2	RAD51_-_40987434.23-P1P2	RAD51_+_40987418.23-P1P2	GCCGAGCCCTAAGGAGAGTG	TAAGGAGAGTGCGGCGCTTC
RAD9B	P1P2	RAD9B_+_110939870.23-P1P2	RAD9B_+_110939846.23-P1P2	GGACGGTGGTGGTGACTGAG	TCACCATCCTGTCACCGGGC
RARS	P1P2	RARS_-_167913515.23-P1P2	RARS_-_167913708.23-P1P2	GGATGGGAGGATGGACGTAC	CTCTCAACCCTTCCTGTTCC
RBM14	P1P2	RBM14_+_66384103.23-P1P2	RBM14_-_66384112.23-P1P2	GACGACCGGCAGTCCTCCTC	CCTCAGGAATGGCTGGCGAC
RBM14-RBM4	P1	RBM14-RBM4_+_66384103.23-P1	RBM14-RBM4_-_66384112.23-P1	GACGACCGGCAGTCCTCCTC	CCTCAGGAATGGCTGGCGAC
RBM28	P1P2	RBM28_-_127983855.23-P1P2	RBM28_-_127983894.23-P1P2	GTCAGGCCGGCCATGAGACC	GCCTAGTTTGCTCGCGTCCC
RBM4	P1	RBM4_+_66384103.23-P1	RBM4_-_66384112.23-P1	GACGACCGGCAGTCCTCCTC	CCTCAGGAATGGCTGGCGAC
RBM8A	P1P2	RBM8A_-_145507844.23-P1P2	RBM8A_-_145507837.23-P1P2	GGGATGGGAATCGAGGAACC	CGATTCCCATCCTTACGACC
RBMX	P1P2	RBMX_-_135962895.23-P1P2	RBMX_+_135962479.23-P1P2	GGCGCAACGAGGGCGAACAA	TGGTGCGGTCGCTCCTCGCC
RBMX2	P1P2	RBMX2_-_129536016.23-P1P2	RBMX2_-_129536058.23-P1P2	GAACCCGAGGAGATGAAGTA	CCAGTGGCCCGCTGCTCCTC
RCC1	P2	RCC1_-_28844804.23-P2	RCC1_-_28844824.23-P2	GGGAGCGCCGGAGTTCCTTG	ACCTTGGTGCACGTCGGCCC
RCL1	P1P2	RCL1_+_4792990.23-P1P2	RCL1_+_4792987.23-P1P2	GGTGGTGGCGGCGACACCGA	CCGTCGGTGTCGCCGCCACC
REXO2	P1P2	REXO2_-_114310257.23-P1P2	REXO2_+_114310243.23-P1P2	GGCTGGTCCCGGGTGATGCT	GGTGATGCTAGGCGGCTCCC
RFC2	P1P2	RFC2_+_73668703.23-P1P2	RFC2_+_73668706.23-P1P2	GGGAGGCGCGAGAATGGAGG	CCATTCTCGCGCCTCCTCTC
RFC3	P1P2	RFC3_+_34392320.23-P1P2	RFC3_-_34392375.23-P1P2	GCCGATACTTGTCCACCCAG	TGTGATAGTCCAGCCGTCCC
RFC4	P1P2	RFC4_+_186524226.23-P1P2	RFC4_+_186524236.23-P1P2	GCGGGAACTGAGGCGACTGT	CAGTTCCCGCCACGGAACGC
RINT1	P1P2	RINT1_-_105172650.23-P1P2	RINT1_+_105172659.23-P1P2	GCATCGAGAGGAAGTCGCTG	ACGGCCTCCGAGGCTGGGTC
RIOK1	P1P2	RIOK1_-_7390078.23-P1P2	RIOK1_+_7390080.23-P1P2	GGGCAGGGTGGTGGATCTGT	GTTTTCCCGTCGCACGTGGC
RIOK2	P1P2	RIOK2_+_96518912.23-P1P2	RIOK2_-_96518949.23-P1P2	GTGTCGTCGGAGAGGCATCT	TACGCTTTGCGGCTGTCGTC
RNASEK	P1P2	RNASEK_+_6915949.23-P1P2	RNASEK_+_6915965.23-P1P2	GAGCGGGCTCGGAAAGCGGT	GCTTGCACCTCGGCGATCCC
RNF113A	P1P2	RNF113A_-_119005686.23-P1P2	RNF113A_+_119005641.23-P1P2	GTCGAAGCAAAAGACACTGA	CGTTGCGCGCTCCGCCGGGC
RNF20	P1P2	RNF20_+_104296142.23-P1P2	RNF20_+_104296191.23-P1P2	GCTGACCCGCGGCGGAGACA	TGGTGAGTAACTGCTGCGAC
RNPC3	P1P2	RNPC3_+_104068769.23-P1P2	RNPC3_+_104068758.23-P1P2	GGTGCCTGACCAGAAGGGTT	CGGGGCGACCGAACCCTTCC
RPA1	P1P2	RPA1_-_1733358.23-P1P2	RPA1_-_1733303.23-P1P2	GGGAAGCTGGAGCTGTTGCG	GAGAAGTTGCGCGCACCGCC
RPA2	P1P2	RPA2_+_28241031.23-P1P2	RPA2_+_28240864.23-P1P2	GAGTAGCCAGAGCGGCGCAG	CTCGGACCCTAGGCTCGCCC
RPA3	P1P2	RPA3_-_7680087.23-P1P2	RPA3_-_7679719.23-P1P2	GGCGGCTGGCGGGAAACCCA	GTCGCCTCCGTTCTAGCCGC
RPAP1	P1P2	RPAP1_+_41836411.23-P1P2	RPAP1_+_41836408.23-P1P2	GAGACAGGCCTGGAGCACGT	CCTACGTGCTCCAGGCCTGC
RPAP2	P1P2	RPAP2_-_92764613.23-P1P2	RPAP2_+_92764648.23-P1P2	GGCCGGAGCGTGTCCCCGTC	TCTTCTGCCGGCCGCAAGGC
RPF1	P1P2	RPF1_-_84945270.23-P1P2	RPF1_-_84945203.23-P1P2	GGTCGCGGGGCGCACATCTG	CTCGCGTACCTTCCGCTGCC
RPF2	P1P2	RPF2_-_111303321.23-P1P2	RPF2_+_111303465.23-P1P2	GGCGGTAGCGATGGACACTC	GGGTCCTCCTCAGCGCGAGC
RPL10	P1P2	RPL10_-_153626730.23-P1P2	RPL10_+_153626685.23-P1P2	GAGGAGCGCCTCTTTCCCTT	ATATAAGCCATGCGCAGGCC
RPL10A	P1P2	RPL10A_-_35436407.23-P1P2	RPL10A_-_35436216.23-P1P2	GGAGCCTCCCTCTTCCACCG	CATGGCTTCTCACGCCGCGC
RPL11	P1P2	RPL11_+_24018674.23-P1P2	RPL11_+_24018498.23-P1P2	GGGCTGGCACCTTCCCTAAG	TCGTTTTAGGAGCGGCTCCC
RPL13	P1P2	RPL13_-_89627126.23-P1P2	RPL13_+_89627141.23-P1P2	GTTTCCTGCGCAGGAGGTGA	TTGGGCATCATCCAGCGCCC
RPL14	P1P2	RPL14_+_40498846.23-P1P2	RPL14_+_40499019.23-P1P2	GACAGTAAGACTCACCATGT	TTCCCGGACTCGCCGCTGGC
RPL17	P1P2	RPL17_-_47018814.23-P1P2	RPL17_-_47018796.23-P1P2	GTGGGCCCTCGGAGCAACGC	AATCCTCCTGCCATCGCCGC
RPL18	P1P2	RPL18_-_49122442.23-P1P2	RPL18_-_49122404.23-P1P2	GAGGTCCGGAAAGAGAGAAC	TCATGGTGAGCTCGCTTTGC
RPL19	P1P2	RPL19_-_37356608.23-P1P2	RPL19_+_37356736.23-P1P2	GGGCCGCAGCCATGAGGTGA	GAGCACTTTCGTCCCGGGCC
RPL21	P1P2	RPL21_+_27825728.23-P1P2	RPL21_+_27825711.23-P1P2	GGCGCCCGGGAGCCACGCGT	TCTTCCAGGTAGGGCCTACC
RPL23	P1P2	RPL23_+_37009944.23-P1P2	RPL23_-_37010011.23-P1P2	GAAGATGTCGAAGCGAGGTG	GTGTCCTTTGAATCGACTTC
RPL23A	P1P2	RPL23A_-_27047048.23-P1P2	RPL23A_+_27047315.23-P1P2	GCGCCGAAAGCGAAGAAGGA	CTGGTTGGAGCTCCATGTCC
RPL24	P1P2	RPL24_-_101405503.23-P1P2	RPL24_-_101405298.23-P1P2	GGTAAGCGGATTGGGAACCA	TCTTGTACTCCGAGGAGGAC
RPL26	P1P2	RPL26_+_8286473.23-P1P2	RPL26_+_8286288.23-P1P2	GCCATCACCGAAGCGGGAGC	TCCATCCATCTCCGGCCCGC
RPL27	P1P2	RPL27_+_41150471.23-P1P2	RPL27_-_41150504.23-P1P2	GCTTACCGGCAGCAACCACC	AAGCTTCTACTTACCGGCAC
RPL27A	P1P2	RPL27A_-_8704367.23-P1P2	RPL27A_-_8704363.23-P1P2	GTCTGGGCTGCCAACATGGT	TGTTGGCAGCCCAGACGAAC
RPL30	P1P2	RPL30_+_99057726.23-P1P2	RPL30_-_99057772.23-P1P2	GGCGGCTGCTGTTGGTGAGT	TTCTCGTTCCCCGGCCATCC
RPL31	P1P2	RPL31_-_101618787.23-P1P2	RPL31_-_101618790.23-P1P2	GGACGCTGCAGAGTGAGTAT	CCCATACTCACTCTGCAGCC
RPL34	P1P2	RPL34_+_109541791.23-P1P2	RPL34_-_109541761.23-P1P2	GGGATGGCAGCCGATTGGTA	TACCTGCAGACAACGTCCCC
RPL35A	P1P2	RPL35A_-_197677284.23-P1P2	RPL35A_+_197677288.23-P1P2	GTCCCCTGACACCCGGAGAA	GGGTTATCCCAGTTAAATTC
RPL36	P1P2	RPL36_+_5690269.23-P1P2	RPL36_+_5690358.23-P1P2	GGAACTCCGGGATATCTACT	GTATCCGCCGCCATCCGGAC
RPL36A	P1P2	RPL36A_-_100646038.23-P1P2	RPL36A_-_100646053.23-P1P2	GGCGCTCACGCAAGCATGGT	CCACCAGCAAGTCCTACCAC
RPL36A-HNRNPH2	P1P2	RPL36A-HNRNPH2_-_100646038.23-P1P2	RPL36A-HNRNPH2_-_100646053.23-P1P2	GGCGCTCACGCAAGCATGGT	CCACCAGCAAGTCCTACCAC
RPL37A	P1P2	RPL37A_-_217363610.23-P1P2	RPL37A_-_217363600.23-P1P2	GGCGGCGACATGGTGAGTGT	TGTCGCCGCGACCTAGGTCC
RPL38	P1P2	RPL38_-_72199864.23-P1P2	RPL38_-_72200186.23-P1P2	GCTTGCTGTGAGTGTCTCTA	CAGGAGATCCTTGGGAGGCC
RPL4	P1P2	RPL4_-_66797132.23-P1P2	RPL4_+_66797200.23-P1P2	GGAACTTCCACTCACCATGG	CTGTATATGTCACCTTCCCC
RPL5	P1P2	RPL5_+_93298010.23-P1P2	RPL5_-_93298046.23-P1P2	GGCGTTCCCCAGCTAGGCTG	CCCTCCATTCTGGCGTTCCC
RPL6	P1P2	RPL6_-_112847347.23-P1P2	RPL6_-_112847036.23-P1P2	GGTTCGGATGGCGAAGGATT	CGTTGGGGTTCCGCACTGAC
RPL7	P1P2	RPL7_-_74205848.23-P1P2	RPL7_+_74205616.23-P1P2	GACTCACTCTACACCCTCCA	GACATCTCGTTCCCGGGATC
RPL7A	P1P2	RPL7A_-_136215123.23-P1P2	RPL7A_+_136215092.23-P1P2	GTGAGTGAGCTGTAGTTCCG	AAGATGGTGAGTGAGCTGTC
RPL8	P1P2	RPL8_+_146017745.23-P1P2	RPL8_-_146017783.23-P1P2	GGCCGCGCTGGTGAACAGGT	TGTTTCCTCTTTCGGCCGCC
RPL9	P1P2	RPL9_+_39460483.23-P1P2	RPL9_+_39460504.23-P1P2	GGATGTTTCTGTGCTCGTGG	TACCTCGCAGTAGACGCAGC
RPLP0	P1P2	RPLP0_-_120638701.23-P1P2	RPLP0_-_120638740.23-P1P2	GCCGCGGTCCCGGGCCTAAG	TAGGCAGGGCCGGCGGGCGC
RPP30	P1P2	RPP30_+_92631924.23-P1P2	RPP30_-_92632066.23-P1P2	GGGGACATCCCAGAGACTCT	TCGTTAGGCCTCAGTTCCCC
RPP40	P1P2	RPP40_-_5004221.23-P1P2	RPP40_+_5004190.23-P1P2	GCCGCGGCGCCTCCCGAAGC	GTAAGTGCCGCGGCGCCTCC
RPS10	P1P2	RPS10_-_34393845.23-P1P2	RPS10_-_34393835.23-P1P2	GTCCGGTACCGGGGCTGGAA	GGTACCGGACCCTGCAGCCC
RPS10-NUDT3	P1P2	RPS10-NUDT3_-_34393845.23-P1P2	RPS10-NUDT3_-_34393835.23-P1P2	GTCCGGTACCGGGGCTGGAA	GGTACCGGACCCTGCAGCCC
RPS13	P1P2	RPS13_+_17099232.23-P1P2	RPS13_+_17099153.23-P1P2	GCGTGTTGGGTGGCTTCCTG	CGAGCTCACCCGGGAGCATC
RPS14	P1P2	RPS14_+_149829238.23-P1P2	RPS14_+_149829235.23-P1P2	GAGGCCCGGGCGCGACAATC	CCCGATTGTCGCGCCCGGGC
RPS15A	P1P2	RPS15A_-_18801590.23-P1P2	RPS15A_+_18801235.23-P1P2	GGATTGCAGGATGGCGCCGA	CCCAAGCTCCCAGCGCGGCC
RPS16	P1P2	RPS16_+_39926539.23-P1P2	RPS16_-_39926387.23-P1P2	GAGGTTGTCTAGTCCACGCT	GAGCTCACGGGGCCCCTGTC
RPS18	P1P2	RPS18_+_33239894.23-P1P2	RPS18_+_33239917.23-P1P2	GACGGATTCCAGTCTTACCA	TGATCCAGCGGCATCGCAGC
RPS19	P1P2	RPS19_-_42364369.23-P1P2	RPS19_+_42364314.23-P1P2	GGAGGCCGCACGGTAAGCGG	CGTCGTTCCCTTTCCCCTGC
RPS20	P1P2	RPS20_+_56986834.23-P1P2	RPS20_+_56986933.23-P1P2	GGCAGATGCCGGGGCGTGTA	CACCATGGCTGTTGCGCGCC
RPS23	P1P2	RPS23_+_81574137.23-P1P2	RPS23_+_81574124.23-P1P2	GCCCGTGGCGCCGACAGGAT	CAACAGCTCACCCATCCTGC
RPS24	P1P2	RPS24_+_79793693.23-P1P2	RPS24_+_79793627.23-P1P2	GCACGGATGGCTCGGATACG	CCTTGGCTGTCTGAAGATAC
RPS26	P1P2	RPS26_-_56435953.23-P1P2	RPS26_+_56435856.23-P1P2	GCCGGTCCGTGCCTCCAAGA	AAGGATTCTCCCGGTGTCCC
RPS27	P1P2	RPS27_+_153963275.23-P1P2	RPS27_-_153963444.23-P1P2	GCCTGGACCAAAGCACTCAC	CTCCCGTCTATGCGGGTGGC
RPS27A	P1P2	RPS27A_+_55459832.23-P1P2	RPS27A_-_55459862.23-P1P2	GAGACACCCACCGCAGATGG	AAGTGCAGACACCCACCGCC
RPS3	P1	RPS3_-_75110633.23-P1	RPS3_-_75110807.23-P1	GAAGAGGAAGGTGAGCCTCT	CACAGCGCCCTCCTGGCTGC
RPS4X	P1P2	RPS4X_+_71497070.23-P1P2	RPS4X_+_71496884.23-P1P2	GTACGCGCACCGGAAGACGG	TTCGCCCTGGAGCCCGTCCC
RPS5	P1P2	RPS5_+_58898640.23-P1P2	RPS5_+_58898715.23-P1P2	GGCGCCGCCCTGGTACAGAC	CGGGGCCGGGGATCCTAGGC
RPS6	P1P2	RPS6_+_19380176.23-P1P2	RPS6_+_19380221.23-P1P2	GTCAAGATGAAGGTAGGTGA	CGGAAAAGAGGGCCAACTTC
RPS7	P1P2	RPS7_-_3622944.23-P1P2	RPS7_-_3622948.23-P1P2	GAGCCGGCGCTCGGCAAGGT	ACCTACCTTGCCGAGCGCCC
RRM1	P1P2	RRM1_-_4116293.23-P1P2	RRM1_+_4116464.23-P1P2	GACGAGGTGGGCGAGAAGGA	CCTCGGCTTTGTCATCCTGC
RRM2	P1P2	RRM2_+_10262870.23-P1P2	RRM2_+_10262917.23-P1P2	GGGACAGGACGGCTGGGACA	CCACTATGCTCTCCCTCCGC
RRP12	P1P2	RRP12_+_99161057.23-P1P2	RRP12_-_99161036.23-P1P2	GGGCTACAGGGTATCCACGT	TGGAAGCCGGTCATTTAAGC
RRP15	P1P2	RRP15_+_218458668.23-P1P2	RRP15_+_218458665.23-P1P2	GCTCACACGTGAGTCCGGAG	CCGCTCCGGACTCACGTGTC
RRS1	P1P2	RRS1_+_67341292.23-P1P2	RRS1_+_67341681.23-P1P2	GACAGTGGCGGCCCAAACTC	CGACCGCGGCCACTTACACC
RSL24D1	P1P2	RSL24D1_-_55488919.23-P1P2	RSL24D1_-_55488741.23-P1P2	GGAGGAACCCGGGCCAAACA	ACCAGGAATCTTGGATGTCC
RTCB	P1P2	RTCB_+_32808188.23-P1P2	RTCB_+_32808194.23-P1P2	GAAGCCGGACTACGCGGCAG	CGTAGTCCGGCTTCTCAGAC
RUVBL1	P1P2	RUVBL1_+_127842630.23-P1P2	RUVBL1_+_127842420.23-P1P2	GAACGGCCGCATGGTAACTC	CACCTCTCGCGCGTTCTCCC
SAE1	P1P2	SAE1_-_47634169.23-P1P2	SAE1_-_47634161.23-P1P2	GTTGAGCGGGACCGGAGCTG	GTCCCGCTCAAGCCAACCGC
SAMM50	P1P2	SAMM50_+_44351418.23-P1P2	SAMM50_-_44351423.23-P1P2	GCTGCCTCGCAGAGCTGCCC	GGGCGGGACAGAGCGTCTGC
SAP18	P1P2	SAP18_+_21714669.23-P1P2	SAP18_-_21714706.23-P1P2	GGAGCACTAAGTCTCTCGCG	CTGCAGCGAGCATGAGCACC
SARS	P1P2	SARS_-_109756603.23-P1P2	SARS_+_109756940.23-P1P2	GCTTCCCTGAGCGTTGGCCC	GGGCGGAGCGAGGTCCCTTC
SART1	P1P2	SART1_-_65729256.23-P1P2	SART1_-_65729572.23-P1P2	GGAGTGGACGTGCCACTATG	CCTCACCGGCCTCGTAGCCC
SCFD1	P1P2	SCFD1_-_31091597.23-P1P2	SCFD1_-_31091592.23-P1P2	GAGCAGCCAGTATTCGGGAA	GAATACTGGCTGCTGCTGCC
SDAD1	P1P2	SDAD1_+_76912051.23-P1P2	SDAD1_+_76911874.23-P1P2	GGCAGCTGGCAGGGATTGCG	CTAGCGTCTGCCGCGCCGCC
SEC13	P1P2	SEC13_-_10362784.23-P1P2	SEC13_+_10362755.23-P1P2	GCGGACGTGGCAGCTCCCGG	GGTCTCGGACGTGGCAGCTC
SEC22B	P1P2	SEC22B_-_145096423.23-P1P2	SEC22B_+_145096647.23-P1P2	GCGGCCACCTCAGCGGGAAG	CAAGTCTCTGTCAGCGCGCC
SEC61A1	P1	SEC61A1_-_127771295.23-P1	SEC61A1_-_127771292.23-P1	GGCACTGACGTGTCTCTCGG	AGAGACACGTCAGTGCTAGC
SF3A1	P1	SF3A1_-_30752688.23-P1	SF3A1_+_30752830.23-P1	GAGCGCCCAGGCCAACCCTC	CCTCAAGACAGCCTCCCCGC
SF3A2	P1	SF3A2_-_2236905.23-P1	SF3A2_-_2236873.23-P1	GGCGGCCTTGGGCTCTGGTG	CGTTTCGCCACCTCCACGAC
SF3B2	P1P2	SF3B2_-_65819849.23-P1P2	SF3B2_-_65820053.23-P1P2	GTTGGTCGCGCGCCTTCCTG	GGGTAACCAGGCTCCGCTTC
SF3B4	P1P2	SF3B4_+_149899609.23-P1P2	SF3B4_+_149899616.23-P1P2	GCGAGCGGAATCAGGGTAAC	TGATTCCGCTCGGAGATCGC
SF3B5	P1P2	SF3B5_-_144416509.23-P1P2	SF3B5_+_144416500.23-P1P2	GAGGTCGAAGTGGCCCATGT	ATGTAGGAGCAGTACGAGTC
SGOL1	P1P2	SGOL1_+_20227653.23-P1P2	SGOL1_+_20227643.23-P1P2	GGCGACGGCGGACGGTGGTA	TCCAGGACCGTACCACCGTC
SHFM1	P1P2	SHFM1_+_96339147.23-P1P2	SHFM1_+_96338938.23-P1P2	GTCGGAGGCGGTAGTGACGG	CCACACGGAGGCCTGAGTCC
SIRT7	P1P2	SIRT7_+_79875714.23-P1P2	SIRT7_+_79875815.23-P1P2	GGCGCGAGGGCCTGAAGCGG	CCGCCTTCCTCAGGATGCGC
SLC35A1	P1P2	SLC35A1_-_88182748.23-P1P2	SLC35A1_-_88182724.23-P1P2	GGCCCCGAGAGGTGAGAACT	TGGTTCCCCGACAGCCCCCC
SLC39A9	P1P2	SLC39A9_+_69865454.23-P1P2	SLC39A9_+_69865417.23-P1P2	GACTCGACCGGGCCTTGACC	CTTGGCGGCCATGGCAGCTC
SLMO2	P1P2	SLMO2_-_57617833.23-P1P2	SLMO2_-_57617811.23-P1P2	GGTAGCGCCAGGGGACAACG	GACATCTCTCAGGGTGCCGC
SLU7	P1P2	SLU7_+_159846048.23-P1P2	SLU7_+_159846060.23-P1P2	GATTCTGTCGGATGGACTTG	ACAGAATCCAAGCCAATCTC
SMC1A	P1P2	SMC1A_-_53449606.23-P1P2	SMC1A_+_53449593.23-P1P2	GGCCGTACGCCCGAGAACTG	GAGAACTGAGGTAGCCCGCC
SMC2	P1P2	SMC2_-_106856631.23-P1P2	SMC2_+_106856781.23-P1P2	GGCGGGTGTTGAGAGCGGTG	GTTGGGCCGGGCCAGACTTC
SMC4	P1	SMC4_-_160117471.23-P1	SMC4_+_160117510.23-P1	GGGACCCGGAGCCGAAACAC	TGGTCTGAGTGGACTGTCCC
SMN1	ENST00000380707.4	SMN1_-_70220949.23-ENST00000380707.4	SMN1_+_70221266.23-ENST00000380707.4	GCTATGGCGATGAGCAGCGG	CTCTGGCTGGTGTGGGGGAC
SMN2	ENST00000380743.4	SMN2_-_69345531.23-ENST00000380743.4	SMN2_+_69345848.23-ENST00000380743.4	GCTATGGCGATGAGCAGCGG	CTCTGGCTGGTGTGGGGGAC
SMNDC1	P1P2	SMNDC1_-_112064253.23-P1P2	SMNDC1_+_112064288.23-P1P2	GTCCAACAGGCAGGCTCCAC	CTGCGGGCCGTGTTTGCCGC
SMU1	P1P2	SMU1_+_33076608.23-P1P2	SMU1_-_33076431.23-P1P2	GGCCTGCTCCCGGAGAGATA	CGGAGGTGGGCCCACAGGAC
SNRNP200	P1P2	SNRNP200_+_96971234.23-P1P2	SNRNP200_-_96971287.23-P1P2	GCGGCGGGAGCAGAGATCTG	CAGTGCGTCTTTCCTGCGTC
SNRNP35	P1P2	SNRNP35_+_123942733.23-P1P2	SNRNP35_-_123942763.23-P1P2	GAGCTTGGGCTCCCTTCCGA	CTGCAAAGCTTGGGCTCCCC
SNRNP48	P1P2	SNRNP48_-_7590517.23-P1P2	SNRNP48_-_7590481.23-P1P2	GGGCGAGCCTCCACCTGTGG	ACCCGCCAAGAGGAAGCGGC
SNRPB	P1P2	SNRPB_+_2451405.23-P1P2	SNRPB_+_2451398.23-P1P2	GGGTAGCGGCGGCGGGAAAT	ACAGCCGATTTCCCGCCGCC
SNRPD1	P1P2	SNRPD1_+_19192567.23-P1P2	SNRPD1_+_19192288.23-P1P2	GGATCCGCGAGCGACCCAGG	CTGGAGTAGGCGCTTCCGGC
SNRPD3	P1P2	SNRPD3_+_24951988.23-P1P2	SNRPD3_+_24951964.23-P1P2	GTCCGCTGCGAAAGATGCTA	TTCGCTTGACTCACGCCTTC
SNRPE	P1P2	SNRPE_-_203830935.23-P1P2	SNRPE_-_203830911.23-P1P2	GGGCCTGGGATAGTGGAGTA	TCAGCCTGCGCCTTCGCACC
SNRPF	P1P2	SNRPF_-_96252774.23-P1P2	SNRPF_-_96252795.23-P1P2	GAACTGCGGCTCGGGACCTG	TCGTGACTACAGCAGGTACC
SNRPG	P1P2	SNRPG_-_70520494.23-P1P2	SNRPG_+_70520808.23-P1P2	GGACAGCGCCGGGTGACCAG	TGGAACGCAACGCACGGCTC
SNW1	P1	SNW1_+_78227503.23-P1	SNW1_+_78227421.23-P1	GTCTGGAAAGACCCGCCCAG	TTCCGTATCGAGGACCCCAC
SON	P1	SON_-_34915392.23-P1	SON_+_34915786.23-P1	GAGGAGTTGAGAGAACGGAG	GGGACGGGCCTAGTTCCTTC
SPC24	P1P2	SPC24_+_11266448.23-P1P2	SPC24_+_11266427.23-P1P2	GTTGGAGCCTGGCGTAGTCA	CTATGTCGCGGAAGGCGGCC
SPC25	P1P2	SPC25_+_169746860.23-P1P2	SPC25_+_169746886.23-P1P2	GAGTGGGCGCGGATCTGGTG	ACAGCCGGACTCTAGGCTCC
SPDL1	P1P2	SPDL1_+_169010824.23-P1P2	SPDL1_-_169010834.23-P1P2	GGCTCAGGGCGTCCACATTG	CATTGAGGACGCTAACTCCC
SRBD1	P1P2	SRBD1_-_45838340.23-P1P2	SRBD1_+_45838356.23-P1P2	GACCCGCAAGACGACCGCCA	TCCCGCCCGGCACGTCAGAC
SRFBP1	P1P2	SRFBP1_-_121297703.23-P1P2	SRFBP1_-_121297697.23-P1P2	GCCGGTTCACGTGCAGGCAG	GCACGTGAACCGGTCTCTCC
SRPRB	P1P2	SRPRB_+_133524699.23-P1P2	SRPRB_+_133524690.23-P1P2	GGCCACCCGGCGCGAGTCCG	TGGCTTCCGCGGACTCGCGC
SRRT	P1P2	SRRT_+_100472814.23-P1P2	SRRT_+_100472790.23-P1P2	GTGAGTAGAGGGCCGAAGAG	CGGTTGTCCCACTTTTGTTC
SRSF1	P1P2	SRSF1_-_56084574.23-P1P2	SRSF1_-_56084638.23-P1P2	GCGGCAGAGCGAGCCCGCAG	CCATATCCGTGCGCCGAGCC
SRSF3	P1P2	SRSF3_-_36562416.23-P1P2	SRSF3_+_36562405.23-P1P2	GGGGCTCCCGGCCCATCGGA	ATCGGAGGGTTTCCTAGTCC
SSBP1	P1P2	SSBP1_+_141438412.23-P1P2	SSBP1_-_141438210.23-P1P2	GGCTAGCCAGCCACACCATA	GACGATCTAACCCGAGCAGC
SSRP1	P1P2	SSRP1_+_57103335.23-P1P2	SSRP1_-_57102976.23-P1P2	GGCCTGTGTACGGCTTCCGG	TGGGGTTCCGCTGCTCGTTC
STAT5B	P1P2	STAT5B_+_40428264.23-P1P2	STAT5B_+_40428385.23-P1P2	GGCGCCCGAGGGGCCGAGCG	GGGGTGACGGCTCCGGCCGC
SUPT5H	P1P2	SUPT5H_-_39936298.23-P1P2	SUPT5H_-_39936260.23-P1P2	GGTAAGTGCGTGTGCAGAGG	CCTTCGGTACCAGCTGCTGC
SUPT6H	P1P2	SUPT6H_-_26989444.23-P1P2	SUPT6H_+_26989285.23-P1P2	GCCTGGTCACGTAAGGGAAG	AGTCTCGGTTCGACGACTCC
SUPV3L1	P1P2	SUPV3L1_+_70940063.23-P1P2	SUPV3L1_+_70940042.23-P1P2	GGGGAGCCGAGCCCACAATA	CGATGTCCTTCTCCCGTGCC
SURF6	P1P2	SURF6_-_136202973.23-P1P2	SURF6_-_136202964.23-P1P2	GGCGAGTAGAGAGGCCATGG	CTCTACTCGCCAAGGACGCC
TAF1A	P1P2	TAF1A_-_222763187.23-P1P2	TAF1A_-_222763193.23-P1P2	GTATGAGCAGGCGCTAAACC	AAACCAGGTTTAGCGCCTGC
TAF2	P1P2	TAF2_-_120844853.23-P1P2	TAF2_+_120845027.23-P1P2	GGGCTTCCTAGGGGGATACG	CTCCGCAAGGGCTCGAAGCC
TAMM41	P1P2	TAMM41_-_11888331.23-P1P2	TAMM41_+_11888312.23-P1P2	GAGCCCAGATAGGCTCGGGT	AGATAGGCTCGGGTGGGCGC
TANGO6	P1P2	TANGO6_+_68877470.23-P1P2	TANGO6_-_68877660.23-P1P2	GCCGCTCAGGCGCCTCGGCA	TGAGAGTCCCGGGTCCAGCC
TARS	P1P2	TARS_+_33441121.23-P1P2	TARS_+_33441139.23-P1P2	GGAGGAGCCAAGAGGCGGGT	CTCCTCTAGGCCGTCGCTTC
TARS2	P1P2	TARS2_-_150459943.23-P1P2	TARS2_-_150459929.23-P1P2	GGAACATGGCCCTGTATCAG	TGTTCCTTCACACCAGTGCC
TBCB	P1P2	TBCB_-_36606424.23-P1P2	TBCB_-_36606452.23-P1P2	GCTGCGGAGCGGGTGTGAGG	TGCGGATGCCTGCAGCGCGC
TBCD	P1P2	TBCD_+_80710368.23-P1P2	TBCD_+_80710388.23-P1P2	GGGCCCGCGGGACCGCGCAC	TGGTGGGGCGCGGCCTTCCC
TBCE	P1P2	TBCE_-_235530783.23-P1P2	TBCE_+_235530696.23-P1P2	GGCTGGGCAGTTGGCTGGAG	TACCTCACTCCGGTGGAGGC
TCERG1	P1P2	TCERG1_-_145826915.23-P1P2	TCERG1_-_145826962.23-P1P2	GTGAACGCGGCCCTCTGTAA	CGGGTTGAATCGTTCACTCC
TCP1	P1P2	TCP1_-_160210626.23-P1P2	TCP1_-_160210636.23-P1P2	GCGTACCCGAGCGATGTCCC	AGTAGCTCCTGGGACATCGC
TEX10	P1P2	TEX10_+_103115133.23-P1P2	TEX10_+_103115177.23-P1P2	GAGCTAGAGCCTGAGGTCGG	CGTCCTCACGCGGCCGCGTC
THG1L	P1P2	THG1L_-_157158658.23-P1P2	THG1L_-_157158472.23-P1P2	GCGGTGAGCGAGCTCGACTC	TAACTTTACAGGCGCCCCAC
THOC2	P1P2	THOC2_+_122866836.23-P1P2	THOC2_-_122866493.23-P1P2	GTGTGGTGGTTCCCGCAGAG	CCTCTTCGCTTGATCTCACC
THOC5	P1P2	THOC5_-_29949679.23-P1P2	THOC5_-_29949705.23-P1P2	GCCTCACAGCTCCAAGAACC	CCGGCAGTGGCTTACTCCCC
TICRR	P1P2	TICRR_+_90118911.23-P1P2	TICRR_-_90118737.23-P1P2	GCCGAATCGGCAACTCAGAT	CTCACTGCTTTCCTTTGGGC
TIMELESS	P1P2	TIMELESS_-_56842914.23-P1P2	TIMELESS_-_56842929.23-P1P2	GCCGGTGAGACCCGGGAACG	TAGTCTCCCGCGCCGCGTTC
TIMM23	ENST00000260867.4	TIMM23_+_51623265.23-ENST00000260867.4	TIMM23_+_51623316.23-ENST00000260867.4	GTTGAGGAGTAACGGCCCAG	ACTTCACACGCTGACCTTCC
TIMM23B	P1P2	TIMM23B_-_51371488.23-P1P2	TIMM23B_-_51371437.23-P1P2	GTTGAGGAGTAACGGCCCAG	ACTTCACACGCTGACCTTCC
TIMM9	P1P2	TIMM9_-_58893843.23-P1P2	TIMM9_-_58893848.23-P1P2	GGGGACGGTTGAGCCTTGGG	TCCCTCCCAAGGCTCAACCC
TOP2A	P1P2	TOP2A_+_38573936.23-P1P2	TOP2A_-_38574150.23-P1P2	GCGTGACGGGTGAAGCTCTG	AACCGACGCGCGTCTGTGGC
TPX2	P1P2	TPX2_-_30327161.23-P1P2	TPX2_-_30327106.23-P1P2	GGCGAGGCTAGGTGAGCCGT	CGGGACTCATTCAGTATCGC
TREX2	P1P2	TREX2_+_152736011.23-P1P2	TREX2_+_152735963.23-P1P2	GCGGCTCGGAGCGCGAAACA	CTGAGTAGTCGTCGCCGCCC
TRMT10C	P1P2	TRMT10C_-_101280737.23-P1P2	TRMT10C_-_101280733.23-P1P2	GGCTGTGTAGACTGTTGGGT	AACAGTCTACACAGCCGACC
TRMT5	P1P2	TRMT5_+_61447749.23-P1P2	TRMT5_+_61447755.23-P1P2	GACCCACATCCGATCGGTAC	ATCGGATGTGGGTCGCGGGC
TRPM7	P1P2	TRPM7_+_50978930.23-P1P2	TRPM7_-_50978757.23-P1P2	GCCTGTGGCCAGTCACCCGG	TTCCGGAGTCCGCCCCGTGC
TRRAP	P1P2	TRRAP_-_98476562.23-P1P2	TRRAP_+_98476147.23-P1P2	GCGGGACGGCGACCAAAGGA	CTTTAAGCGGGGGCGGGACC
TSEN2	P1P2	TSEN2_-_12526016.23-P1P2	TSEN2_-_12525993.23-P1P2	GGAGCGCGTGGGGCCAAGAA	TTACCCCGGCAACGCCGGCC
TSR2	P1P2	TSR2_-_54466860.23-P1P2	TSR2_-_54467042.23-P1P2	GGACTGGGGCCGGATAATGG	ACTCCTCTTATGCCGCCTAC
TTC1	P1P2	TTC1_-_159436216.23-P1P2	TTC1_-_159436177.23-P1P2	GAGGTTGTGAGTAACCCCGT	CCTTCTTAGCCTCTGAGAGC
TTC27	P1P2	TTC27_+_32853190.23-P1P2	TTC27_+_32853193.23-P1P2	GTGCGGATACTACCTCAAGG	TGAGGTAGTATCCGCACATC
TTC4	P1P2	TTC4_-_55181504.23-P1P2	TTC4_+_55181518.23-P1P2	GGCGCTGCCGGGAGGATTGA	CCGGAAGGAGCCGCTCGCTC
TTI1	P1P2	TTI1_+_36661804.23-P1P2	TTI1_+_36661799.23-P1P2	GAGAGAAAGGCTGGAAGACG	TACCTCGTCTTCCAGCCTTC
TTK	P1P2	TTK_+_80714409.23-P1P2	TTK_-_80714487.23-P1P2	GCCTACAGAAAGCTGCGCTG	ACACCGGCTGCGGCTGTTCC
TUBGCP2	P1P2	TUBGCP2_+_135122315.23-P1P2	TUBGCP2_-_135122422.23-P1P2	GCCGGGACTGCGGTGAGTCC	GTCGGCCACCGTCCGCGAGC
TUBGCP3	P1P2	TUBGCP3_-_113242418.23-P1P2	TUBGCP3_+_113242380.23-P1P2	GTCCTGACAGGCTAAGGCGC	CGCAAGCTCCCTGCTCCTGC
TUBGCP5	P1P2	TUBGCP5_-_22833527.23-P1P2	TUBGCP5_-_22833553.23-P1P2	GGCTGCAGGAGCGCGGAACA	ACTCCACGGTGGCCCGTGCC
TWISTNB	P1P2	TWISTNB_+_19748588.23-P1P2	TWISTNB_+_19748635.23-P1P2	GGCCAGCGGCGGCTTCTGAT	TGCTGCTTGTCAAGGTTCCC
U2AF1	P1P2	U2AF1_+_44527626.23-P1P2	U2AF1_+_44527620.23-P1P2	GGCGTCGGCAGCAGTGTCGA	CTGCCGTCGACACTGCTGCC
UBA1	P1	UBA1_-_47053257.23-P1	UBA1_-_47053260.23-P1	GCGGCGGCTCGGCTGTAAGG	CCTCCTTACAGCCGAGCCGC
UBA3	P1P2	UBA3_+_69129471.23-P1P2	UBA3_-_69129485.23-P1P2	GCGAGGAGCCGTAAGTACCG	TAAGTACCGGGGCTCTGCAC
UMPS	P1P2	UMPS_-_124449324.23-P1P2	UMPS_-_124449321.23-P1P2	GAGGCAGCGCGCGACAATGG	TTGTCGCGCGCTGCCTGTTC
UQCRB	P1P2	UQCRB_+_97247725.23-P1P2	UQCRB_-_97247570.23-P1P2	GGCAGGCCGGTAAGTAACTG	CAGGGCGGGCTTGCCTGTAC
UQCRFS1	P1P2	UQCRFS1_+_29704033.23-P1P2	UQCRFS1_+_29704050.23-P1P2	GACCGGCTTGGCGGTTGGAG	GTCACAGGGACGACCTTCCC
USP39	P1	USP39_-_85843325.23-P1	USP39_+_85843306.23-P1	GGGCCGGTAGTGGAGATGTC	GTAGTGGAGATGTCCGGCCC
UTP15	P1P2	UTP15_-_72861621.23-P1P2	UTP15_-_72861666.23-P1P2	GTGTGTCGCCGGCTCCTTGA	ACCCTGCACAGTTCAGCAGC
UTP3	P1P2	UTP3_+_71554274.23-P1P2	UTP3_-_71554284.23-P1P2	GCAGCGCGCTCCCCTACCAC	ACCACCGGAGTTTGCAGACC
UTP6	P1P2	UTP6_-_30228710.23-P1P2	UTP6_-_30228722.23-P1P2	GAACACGAGCAGGAAGCTCC	AACCTGAAACCGGGAGCTTC
VARS	P1P2	VARS_+_31763457.23-P1P2	VARS_+_31763097.23-P1P2	GTGCCGGGGCGGCGATCTTA	CACGGGAGCTCCTTCGCCGC
VARS2	P1P2	VARS2_-_30882058.23-P1P2	VARS2_+_30882095.23-P1P2	GAGGGCCACGTTCCAGGGTC	TGGGATAGCGGCGGGGCCTC
VCP	P1P2	VCP_-_35072535.23-P1P2	VCP_+_35072233.23-P1P2	GGGCGTCGGGCGAACAACGC	CTCTGACGCGCCCACGGCCC
VPS29	P1P2	VPS29_+_110939870.23-P1P2	VPS29_+_110939846.23-P1P2	GGACGGTGGTGGTGACTGAG	TCACCATCCTGTCACCGGGC
VPS54	P1P2	VPS54_+_64246129.23-P1P2	VPS54_+_64246255.23-P1P2	GAGCCTCGGTGCGACGTGGA	TCTCGAGCCCAGCTTCACTC
VPS72	P1P2	VPS72_+_151162629.23-P1P2	VPS72_+_151162601.23-P1P2	GCCAAAACCGAGCTGGTGAG	ACCGAGACTGCGCCGCCACC
WBP11	P1	WBP11_-_14956200.23-P1	WBP11_+_14956452.23-P1	GGAGGAGGAGCGGGGCAAAG	CCTTCTCTTAGCGCCGCTTC
WDR12	P1P2	WDR12_+_203776353.23-P1P2	WDR12_-_203776953.23-P1P2	GTTCTGCAGAGGAGACCGGA	CTATCGGCCACCGTCGACCC
WDR3	P1P2	WDR3_-_118472399.23-P1P2	WDR3_-_118472430.23-P1P2	GTCGGCTGGGAGCCTCGTGG	AACCACGCACCTCCAGGACC
WDR33	P1P2	WDR33_+_128568707.23-P1P2	WDR33_-_128568762.23-P1P2	GGGCCCATAGGGGAAGATGG	GTGCGTGATGACCCCAGAGC
WDR46	P1P2	WDR46_+_33256768.23-P1P2	WDR46_+_33256781.23-P1P2	GAAACCGCGGCGATACTGGG	CGGTTTCTACAGGCACATCC
WDR5	P1P2	WDR5_+_137001236.23-P1P2	WDR5_+_137001233.23-P1P2	GGCGCGGACTCAGCTCGACA	CCTTGTCGAGCTGAGTCCGC
WDR75	P1P2	WDR75_-_190306224.23-P1P2	WDR75_+_190306186.23-P1P2	GCGCTACTGCGCAAAGATGG	GAGATTGGCCATTCCGCTAC
XRCC5	P1P2	XRCC5_-_216974154.23-P1P2	XRCC5_+_216974143.23-P1P2	GGACCAAAGCGCCTGAGGAC	GAGGACCGGCAACATGGTGC
YAE1D1	P1P2	YAE1D1_+_39606256.23-P1P2	YAE1D1_-_39606051.23-P1P2	GGGGTCGGACCGGGTCCCTA	TGGATCAAGGAGGCTGCTTC
YTHDC1	P1P2	YTHDC1_-_69215701.23-P1P2	YTHDC1_-_69215755.23-P1P2	GAGGCCCAGCCTTCTCGTTA	GCCGTCGCCATCTGTTTCCC
ZC3H8	P1P2	ZC3H8_+_113012608.23-P1P2	ZC3H8_-_113012642.23-P1P2	GTCCGGGTTGTCACTCTCTC	TCTCGTCGCGTCCGGGTTGC
ZCCHC9	P1P2	ZCCHC9_+_80597457.23-P1P2	ZCCHC9_-_80597504.23-P1P2	GTCCCCCAGAGCAGCCGAGT	CGCAGCTTCTTACCGCGCAC
ZMAT2	P1	ZMAT2_-_140080067.23-P1	ZMAT2_+_140080265.23-P1	GTGGCGTCGGGCAGCGGGGT	CAGTCTTCTCGTACAGTCCC
ZMAT5	P1P2	ZMAT5_+_30162943.23-P1P2	ZMAT5_-_30162951.23-P1P2	GCCCGGAGCTGCAGCCACCG	CCGGGGAGCCAGGTACCTTC
ZNF236	P1P2	ZNF236_+_74534757.23-P1P2	ZNF236_-_74534593.23-P1P2	GGGCCCGCCCGGCCAGTCGG	TGGGCTTCGGGGGGCGGCCC
ZNF574	P1	ZNF574_-_42580351.23-P1	ZNF574_-_42580345.23-P1	GCGGAGCAGGCGAGAGGCGA	CTCGCCTGCTCCGTAGCCTC
ZNF830	P1P2	ZNF830_-_33288620.23-P1P2	ZNF830_+_33288601.23-P1P2	GCTCCGCCCGGACTCCGGCA	CCCGGACTCCGGCAGGGAAC
ZNHIT6	P1P2	ZNHIT6_-_86174058.23-P1P2	ZNHIT6_+_86173852.23-P1P2	GTTACCGGTCGGAATACCTA	CTGCTAAGTCCCTTACTCCC
ZNRD1	P1P2	ZNRD1_+_30029087.23-P1P2	ZNRD1_-_30029063.23-P1P2	GGACTTGGAACCCTTTCCAG	TGGGCTAGAGCGCCAGCTCC
A1BG	P1	A1BG_+_58858964.23-P1	A1BG_-_58858788.23-P1	GCTCCGGGCGACGTGGAGTG	CTACCGCTCCTGGGTGCCCC
A1BG	P2	A1BG_-_58864840.23-P2	A1BG_-_58864822.23-P2	GCCGGTGCAGTGAGTGTCTG	GAGTGAGCGCGACCATCATC
A1CF	P1P2	A1CF_+_52645339.23-P1P2	A1CF_-_52645373.23-P1P2	GGGGATCTCTGAAATTACTC	TTTCCGGGTGGGGATCTCTC
A2M	P1P2	A2M_+_9268487.23-P1P2	A2M_+_9268495.23-P1P2	GAGATGGATTGTAGGGAGTA	ACAATCCATCTGGTCCCAAC
A2ML1	P1P2	A2ML1_+_8975211.23-P1P2	A2ML1_-_8975593.23-P1P2	GCAGATTTTTCCAGGGTCAG	TCAGGAGGCCCTCACCGAGC
A3GALT2	ENST00000442999.3	A3GALT2_+_33786659.23-ENST00000442999.3	A3GALT2_+_33786649.23-ENST00000442999.3	GCTCAGGTGAGGGGGGACAA	CTCCATACCATTGTCCCCCC
A4GALT	P1P2	A4GALT_-_43116819.23-P1P2	A4GALT_+_43116792.23-P1P2	GGTACCTCTAGCTCCAGCGG	CTCGTACCTCTAGCTCCAGC
A4GNT	P1P2	A4GNT_+_137851178.23-P1P2	A4GNT_-_137851117.23-P1P2	GGCATTTGCAGCTAGAAGTT	AGACGTGAGATCTGTGTTCC
AAAS	P1P2	AAAS_-_53715438.23-P1P2	AAAS_+_53715355.23-P1P2	GAGGACGAGTACGCGGTCCC	CAAGGGACAAACGGCGAGGC
AACS	P1P2	AACS_+_125549983.23-P1P2	AACS_-_125550169.23-P1P2	GCGGCGGCGGCGGGGAACAA	GGATCTCCTCCCGACCGGGC
AADAC	P1P2	AADAC_-_151531954.23-P1P2	AADAC_-_151531939.23-P1P2	GGAAGCGGGACGTTCACCAT	CTTCTTGGTCTCTAGAAACC
AADACL2	P1P2	AADACL2_+_151451732.23-P1P2	AADACL2_+_151452121.23-P1P2	GGTAGAGCAATTGTAGACTT	TATATCTGTGAGTAACAGTC
AADACL3	P1P2	AADACL3_+_12776133.23-P1P2	AADACL3_+_12776213.23-P1P2	GGAGAGGAAGCTGTGCGCAG	GAGTGTTCTCACTAGGGGTC
AADACL4	P1P2	AADACL4_+_12704573.23-P1P2	AADACL4_+_12704601.23-P1P2	GCAAGAGTAGCACTAGCCAG	ATCTTTTTCCTGGGGGTCTC
AADAT	P1P2	AADAT_-_171011368.23-P1P2	AADAT_+_171011325.23-P1P2	GCGGCCCAGAGGCTAGCCCA	CGTTGGCCGGCCTAGGCGCC
AAED1	P1P2	AAED1_-_99417574.23-P1P2	AAED1_+_99417525.23-P1P2	GGCGCGGCCATGACGCGGGG	CTAACCTGCCGCGTGACCGC
AAGAB	P1P2	AAGAB_-_67546997.23-P1P2	AAGAB_-_67546928.23-P1P2	GCTCGCGAGCCGGTTCCGTC	CCGTCTTCTCAGGAGACCAC
AAK1	P1P2	AAK1_-_69870791.23-P1P2	AAK1_-_69870794.23-P1P2	GGGCCTGCGACGCAGAGAAG	CCTCTTCTCTGCGTCGCAGC
AAMDC	P1P2	AAMDC_-_77532236.23-P1P2	AAMDC_-_77532222.23-P1P2	GGCGCTGGGAGCGTAAGTGC	AGCGCTGCTTCGGGATCTGC
AAMP	P1P2	AAMP_+_219134841.23-P1P2	AAMP_+_219134851.23-P1P2	GGCTGACTCTGGGAGGCGTT	AGAGTCAGCTCTGCGCGACC
AANAT	P1P2	AANAT_-_74463789.23-P1P2	AANAT_+_74463735.23-P1P2	GGCTTTGTGGAGGGAACACT	GTGCCTGCGGACAGGCCCCC
AAR2	P1P2	AAR2_-_34824434.23-P1P2	AAR2_-_34824425.23-P1P2	GTGGGGCGAGGCGGTGAGTG	CCTCGCCCCACGTTCCGGTC
AARD	P1P2	AARD_+_117950477.23-P1P2	AARD_+_117950489.23-P1P2	GAAGTCCCCGGGGCCCATCG	GGGACTTCCGCCGCTGCAGC
AARS2	P1P2	AARS2_+_44281027.23-P1P2	AARS2_+_44281044.23-P1P2	GAGTGGCAGCTGCAGCCCGG	CTGACGCTGCCATCGTAGCC
AARSD1	P1	AARSD1_-_41116425.23-P1	AARSD1_+_41116412.23-P1	GCCGTGACGCCGTACCTCTC	TACCTCTCGGGCATAACTGC
AARSD1	P2	AARSD1_+_41132061.23-P2	AARSD1_-_41132037.23-P2	GAGCGGGAGCCGCAATGGCA	CCTGGCCCTTTTCCCTGGAC
AASDH	P1P2	AASDH_-_57253588.23-P1P2	AASDH_+_57253570.23-P1P2	GTTTCCCGGATAGCTCGTCG	GGATAGCTCGTCGCGGATAC
AASDHPPT	P1P2	AASDHPPT_+_105948405.23-P1P2	AASDHPPT_+_105948450.23-P1P2	GCGGACCTCGCCGCTATCTC	AACGGTTCTGCTTGGTGCCC
AASS	P1P2	AASS_+_121784247.23-P1P2	AASS_+_121784219.23-P1P2	GCGACTCGGAAGATTCGAGG	CTCTGGGGCGCCGACTTGTC
AATF	P1P2	AATF_-_35306286.23-P1P2	AATF_-_35306346.23-P1P2	GAGTGGCCGGTCCAGAGCTG	GATCCTCTCGCCTTGATCCC
AATK	ENST00000326724.4	AATK_-_79139957.23-ENST00000326724.4	AATK_+_79139571.23-ENST00000326724.4	GGCAGAGCCCGCACCGGTGG	CTCCGAGATCTGGGGCCGCC
ABAT	P1	ABAT_-_8768533.23-P1	ABAT_-_8768504.23-P1	GCCCGCAAGTCGGAACCCGG	CGAGTTCCGGCAGCGCTGGC
ABAT	P2	ABAT_+_8807464.23-P2	ABAT_+_8807450.23-P2	GGATGCACTCAGCTGGTACC	TTGCGCACTTGCCGGGTACC
ABCA1	P1P2	ABCA1_-_107690385.23-P1P2	ABCA1_-_107690389.23-P1P2	GGCCGCAGCCCGGGAGAGAA	ACCCTTCTCTCCCGGGCTGC
ABCA10	P1P2	ABCA10_+_67224811.23-P1P2	ABCA10_-_67224823.23-P1P2	GAAGAGGCAACCATTTGTAG	TTTGTAGAGGAGTCCTTGAC
ABCA12	P1P2	ABCA12_+_216003308.23-P1P2	ABCA12_+_216003314.23-P1P2	GCATGGAGAGTAGGAGGTGT	CCTACTCTCCATGAAATTAC
ABCA13	P1P2	ABCA13_+_48211097.23-P1P2	ABCA13_-_48211093.23-P1P2	GCCACAGCAGGGCTTTGAAC	GCATGCCCCATGCCTGCTGC
ABCA2	P1P2	ABCA2_-_139922596.23-P1P2	ABCA2_+_139922669.23-P1P2	GTGGTGCAGGAAGCCCATGG	CTGGGCATCGCCCGCGCGGC
ABCA3	P1P2	ABCA3_+_2390611.23-P1P2	ABCA3_-_2390704.23-P1P2	GGGGAGGGGACCCCGCGAGA	CTCCAGGGCGGCCACGCAGC
ABCA4	P1P2	ABCA4_-_94586658.23-P1P2	ABCA4_+_94586668.23-P1P2	GGAGGCCCCTCAGACAGCAA	TTAAGAGCGCCTCTGGCTCC
ABCA5	P1P2	ABCA5_-_67322891.23-P1P2	ABCA5_-_67323220.23-P1P2	GCGGCCGGACCCGGTCCCAG	GACAGCTCTGCGGCTCGGGC
ABCA6	P1P2	ABCA6_+_67138008.23-P1P2	ABCA6_+_67137842.23-P1P2	GCAGGCTGTGTAAGAGCTGC	ACATATTTGGCACAGCACAC
ABCA7	P1	ABCA7_-_1040133.23-P1	ABCA7_+_1040185.23-P1	GGCGCACTTGGCTTAAGGGG	CTGGAAGGTGAGAAGGACTC
ABCA7	P2	ABCA7_+_1041311.23-P2	ABCA7_-_1041459.23-P2	GAGAGGTCAGGACAACGGTC	ACCCGGCCCTGGTCTCACAC
ABCA8	P1P2	ABCA8_+_66951401.23-P1P2	ABCA8_-_66951525.23-P1P2	GTTCTAAACAAGGAGCTCAG	CTCTGAAAGCAGTCTTCACC
ABCA9	P1P2	ABCA9_-_67057053.23-P1P2	ABCA9_+_67057085.23-P1P2	GAGAAACACAGTTCATCCAT	TTTGGGTCACTACTACATCC
ABCB1	ENST00000265724.3	ABCB1_-_87342674.23-ENST00000265724.3	ABCB1_-_87342657.23-ENST00000265724.3	GGGAGGAGCTACATGAACTA	CCTCTGGTACTGGGATAAAC
ABCB10	P1P2	ABCB10_+_229694285.23-P1P2	ABCB10_-_229694297.23-P1P2	GCGCGGCCAGCCGCGTTCCC	CGTTCCCGGGTCCCTATCGC
ABCB11	P1P2	ABCB11_-_169887784.23-P1P2	ABCB11_-_169887796.23-P1P2	GGAAATAATGGACTCCACTG	TTTAACTCTCCACAGTGGAC
ABCB4	P1P2	ABCB4_+_87104933.23-P1P2	ABCB4_-_87104975.23-P1P2	GTTCGAGGTGAGAGAGGTCC	TGCCAGACACGCGCGAGGTC
ABCB5	P1P2	ABCB5_+_20687051.23-P1P2	ABCB5_+_20687242.23-P1P2	GGCTCACAGAGAGATATTAG	TTCATATTTTCCAGGTTATC
ABCB6	P1P2	ABCB6_-_220083604.23-P1P2	ABCB6_+_220083613.23-P1P2	GGCCGCCACGCACTCACGCA	TCTCAGCACGGCCCCGCTGC
ABCB7	P1P2	ABCB7_+_74375885.23-P1P2	ABCB7_-_74376019.23-P1P2	GAAGGGCAAGGGGACCTGTA	TTAGTCTCTGTTAGCGGCTC
ABCB8	P1P2	ABCB8_-_150725551.23-P1P2	ABCB8_-_150725580.23-P1P2	GGCCAACATAGAGCCCTCAG	CCGGCAATAGCAGTTTCACC
ABCB9	P1	ABCB9_+_123450970.23-P1	ABCB9_-_123450999.23-P1	GGCAGCGGCGCAGCGCGGGT	ACCTTGCAGCGGCGCAGCGC
ABCB9	P2	ABCB9_-_123465699.23-P2	ABCB9_-_123465738.23-P2	GGCGGCGCCATGGCTCACGT	CGGGACCGGCTGCGACTCCC
ABCC1	P1P2	ABCC1_+_16043482.23-P1P2	ABCC1_-_16043440.23-P1P2	GCTGGCGCTAGCGCTGGCGG	CCTGGTTGGCCCGCGCGTCC
ABCC10	P1P2	ABCC10_+_43395315.23-P1P2	ABCC10_-_43395343.23-P1P2	GTGGCACCCCACCTAGAGGT	CGGCTGGCACCCCACCTAGC
ABCC11	P1	ABCC11_-_48278125.23-P1	ABCC11_+_48278130.23-P1	GACGCTCAAGTCTTACCGGG	AGAGAGCAGCGCGAAGCCAC
ABCC11	P2	ABCC11_+_48281428.23-P2	ABCC11_+_48281345.23-P2	GGCACACTAACGTGCAGAAA	GCGTTCTTTGCCACACAGAC
ABCC12	ENST00000311303.3	ABCC12_-_48180643.23-ENST00000311303.3	ABCC12_-_48180648.23-ENST00000311303.3	GCCAAGAGCAGAAAACCCTA	CACCATAGGGTTTTCTGCTC
ABCC2	P1P2	ABCC2_+_101542981.23-P1P2	ABCC2_-_101542705.23-P1P2	GTCTCAGCAAGACTCAGTCA	TAAGTTAACTAACTACCACC
ABCC3	P1P2	ABCC3_+_48712248.23-P1P2	ABCC3_+_48712270.23-P1P2	GCGAGCGCGGTCGGACCCAG	TCCTTGCAGCCGCGCCTCGC
ABCC4	P1P2	ABCC4_+_95953430.23-P1P2	ABCC4_+_95953641.23-P1P2	GCGCCGCGGACGCACTCTCC	CAAGCAGGGATGCTGGGGCC
ABCC5	P1P2	ABCC5_-_183735467.23-P1P2	ABCC5_+_183735648.23-P1P2	GGGCGGCGGCAGGAGACCAG	CTCAACCACGCTCCCGAGCC
ABCC6	ENST00000205557.7	ABCC6_-_16317247.23-ENST00000205557.7	ABCC6_-_16317344.23-ENST00000205557.7	GGAGAGTGGGGCGCGATGGG	AGAGACTTAGCGACAGACAC
ABCC8	P1P2	ABCC8_+_17498387.23-P1P2	ABCC8_+_17498394.23-P1P2	GGCGGAGCTGCAAGGGACAG	TTGCAGCTCCGCCGCCCGGC
ABCC9	P1P2	ABCC9_+_22094309.23-P1P2	ABCC9_+_22094148.23-P1P2	GAGGTCTCCGGCCCCAGGCG	CCCCTAGGCGAAGCACGCAC
ABCD1	P1P2	ABCD1_-_152990338.23-P1P2	ABCD1_-_152990342.23-P1P2	GCTTCAGCCAGGCTGCGGAG	TCCGCTCCGCAGCCTGGCTC
ABCD2	P1P2	ABCD2_+_40013594.23-P1P2	ABCD2_-_40013610.23-P1P2	GTCATTCCCGGTAGATGCAG	GGTAGATGCAGCGGAGTCTC
ABCD3	P1P2	ABCD3_+_94884002.23-P1P2	ABCD3_+_94884032.23-P1P2	GGTACCAGCGAGCCGGCGAG	TGGCGGCCTTCAGCAAGTAC
ABCD4	P1P2	ABCD4_+_74769611.23-P1P2	ABCD4_-_74769729.23-P1P2	GTCCCTCGGGTCTCAGGTCA	TCCTCTCTATCAAACGCCGC
ABCF1	P1	ABCF1_+_30539238.23-P1	ABCF1_+_30539469.23-P1	GGTGGCAGTTACAGCTACTG	GGGAGGAGTTTGCCGGGGAC
ABCF2	P1P2	ABCF2_+_150924287.23-P1P2	ABCF2_+_150924236.23-P1P2	GCCGCACGCGGAGGATCCTA	CTAACTCACTGGGCCTCGCC
ABCF3	P1P2	ABCF3_-_183903991.23-P1P2	ABCF3_-_183904021.23-P1P2	GGCGCGGACGGGTTCCTGAG	CAGGATTTCGGCGCAAGTCC
ABCG1	P1P2	ABCG1_-_43639282.23-P1P2	ABCG1_+_43639503.23-P1P2	GCAGCCCGCACCCCGCGCAG	CTCCCAGGAGCGCGTCCTCC
ABCG2	P1P2	ABCG2_+_89080044.23-P1P2	ABCG2_+_89079974.23-P1P2	GCCACTGCGTTCAGCTCTGG	GGACATCCAGGGGACGAGCC
ABCG4	P1P2	ABCG4_+_119019794.23-P1P2	ABCG4_-_119019798.23-P1P2	GGCTTCCCAGAGCCTGGTCC	GGACGCTGTGTCCTCCGAGC
ABCG5	P1P2	ABCG5_+_44065865.23-P1P2	ABCG5_-_44065840.23-P1P2	GCCCAACTGAAGCCACTCTG	AGCTTTGCTGCCTGTTGGCC
ABCG8	P1P2	ABCG8_+_44066166.23-P1P2	ABCG8_-_44066172.23-P1P2	GCCCACAGGTCTGTGACCCT	TGGGCTGCAGCTCTCTTAGC
ABHD1	P1P2	ABHD1_-_27346733.23-P1P2	ABHD1_+_27346724.23-P1P2	GGACCTGCACAGGCCGCCTA	CCTATGGCGGGCGGCGGGTC
ABHD10	P1P2	ABHD10_-_111697914.23-P1P2	ABHD10_-_111697877.23-P1P2	GGGGACAACTACGAAGATGG	ACTGAGGGACACGCTACGCC
ABHD11	P1P2	ABHD11_-_73153094.23-P1P2	ABHD11_+_73152963.23-P1P2	GCCTCCAGGCTCGGGTCCAG	TTGACTGACCTCGGCTCGGC
ABHD12	P1P2	ABHD12_+_25371393.23-P1P2	ABHD12_+_25371436.23-P1P2	GTGGCGGCGGCTGTGAGCGG	GCCGCTCCTCACATCCCAGC
ABHD12B	P1P2	ABHD12B_-_51338864.23-P1P2	ABHD12B_-_51338885.23-P1P2	GCGGACTGCAGCTCCCGCGG	TGTCCCGATACGCCGCCACC
ABHD13	P1P2	ABHD13_-_108870892.23-P1P2	ABHD13_+_108870795.23-P1P2	GTAGACCGTGGCGCCGGCAG	GCGGGGGCATTTGCCGGCGC
ABHD14A	P1P2	ABHD14A_+_52009255.23-P1P2	ABHD14A_+_52009194.23-P1P2	GGGTAAAGACGGCCCTCCCC	GCCCGCTCATCCCGTTGGGC
ABHD14B	P1	ABHD14B_-_52007985.23-P1	ABHD14B_-_52008040.23-P1	GAGTGCAGGGCGGGTACCTG	CAGGTCACCGCCAGCACGCC
ABHD14B	P2	ABHD14B_+_52017350.23-P2	ABHD14B_-_52016965.23-P2	GGCCTCAGCGAGATTACTGG	ACACTGAACTCCAGGAGGCC
ABHD15	P1P2	ABHD15_-_27893980.23-P1P2	ABHD15_-_27894008.23-P1P2	GCGAGGGCGGCGCCCCACGG	GCCGGGGCTCTCCAGCTTCC
ABHD16A	P1P2	ABHD16A_-_31670764.23-P1P2	ABHD16A_+_31670831.23-P1P2	GAAGGAGGCGGCCAGTCCGT	CTTATTTCCCATTATGGGCC
ABHD16B	P1P2	ABHD16B_-_62492870.23-P1P2	ABHD16B_+_62492837.23-P1P2	GCGCGGCGATCCCGGCCCAG	TGTGCCTCTCGCGGCGATCC
ABHD17A	P1P2	ABHD17A_-_1885483.23-P1P2	ABHD17A_+_1885470.23-P1P2	GCCGCAGCTCCCCCCACGGA	CCCACGGACGGAAGTGAGCC
ABHD17B	P1P2	ABHD17B_+_74526089.23-P1P2	ABHD17B_+_74525862.23-P1P2	GCCAGTCAGTGGCCAACTCC	GTCGGTTGCTCTCGGGCCTC
ABHD17C	P1P2	ABHD17C_+_80987703.23-P1P2	ABHD17C_+_80987662.23-P1P2	GGGCTGGCCCGGGAGGACGG	TCCGCGCTCGCCTGCCAGCC
ABHD2	P1P2	ABHD2_-_89631760.23-P1P2	ABHD2_-_89631738.23-P1P2	GAGCTGCAGGAACCAGACTG	CGGCTGCCAGCGGCGCTCAC
ABHD3	P1P2	ABHD3_-_19284770.23-P1P2	ABHD3_+_19284534.23-P1P2	GGGAGCGCGGCTTCCGACAA	GAGCCGAAGAACCCCACCCC
ABHD4	P1P2	ABHD4_-_23067199.23-P1P2	ABHD4_+_23067144.23-P1P2	GGGGCGGGCTCGCCAGGACC	CCCGGGTCAGCTGGTGCTGC
ABHD5	P1P2	ABHD5_-_43732464.23-P1P2	ABHD5_-_43732422.23-P1P2	GCCGGCTTCGAGATAAGTCC	CGGGCTGGCGCGGCACTTAC
ABHD6	P1P2	ABHD6_+_58223718.23-P1P2	ABHD6_-_58223594.23-P1P2	GCCGCTGCAGGGAGACACTG	TCGGTCTCTAGCCCCGGGCC
ABHD8	P1P2	ABHD8_-_17414201.23-P1P2	ABHD8_-_17414169.23-P1P2	GCCCCTGGCGGTCAGCGCAG	GCGTAGACGCACCCGGCCTC
ABI1	P1P2	ABI1_-_27149837.23-P1P2	ABI1_-_27149855.23-P1P2	GTCTCGCGTTAAAGAGACAG	CGGCGGACCTTGCTGCCTCC
ABI2	P1P2	ABI2_-_204193288.23-P1P2	ABI2_+_204193079.23-P1P2	GGAAATCCCGGGGGGCCGCC	CCTCCCCTGTCGCGCGCTGC
ABI3	P1P2	ABI3_-_47288028.23-P1P2	ABI3_+_47287798.23-P1P2	GAGGCAGAGCAACCAATCAA	CGACCTTGGCTTCCTCTGCC
ABI3BP	P1P2	ABI3BP_-_100712220.23-P1P2	ABI3BP_-_100712267.23-P1P2	GAGAAGTAGACACCCCAAAC	ACCAGCATCATTCCCCATGC
ABL1	ENST00000372348.2	ABL1_-_133589228.23-ENST00000372348.2	ABL1_-_133589216.23-ENST00000372348.2	GGCGAGAGCGGCCACTAGTT	CTCTCGCTTCTCTGCTTTGC
ABL2	P1	ABL2_-_179112151.23-P1	ABL2_-_179112154.23-P1	GGATCTCTGCCATAACTATT	CCTAATAGTTATGGCAGAGC
ABL2	P2	ABL2_-_179198834.23-P2	ABL2_+_179198736.23-P2	GCCGAGCGCTGGGAAAGCGT	TCCTCCTGTCGCGGCTCCGC
ABLIM1	ENST00000277895.5	ABLIM1_+_116418018.23-ENST00000277895.5	ABLIM1_-_116417810.23-ENST00000277895.5	GGGGAACAGAGAGAATTGTG	CTCATAGGCGTGCCACTATC
ABLIM2	P1P2	ABLIM2_+_8160523.23-P1P2	ABLIM2_+_8160328.23-P1P2	GCTGGCGTGTGCGCAAGGAG	CCGAATGCCACCCAGCCCTC
ABLIM3	P1P2	ABLIM3_-_148521229.23-P1P2	ABLIM3_+_148521102.23-P1P2	GGGCCGAGAGGTGGGTTCCG	CTATTTCGCATTGCTAGCCC
ABO	P1	ABO_+_136150601.23-P1	ABO_+_136150587.23-P1	GGAGACCAGACGCGGAGCCA	CAACACCTCGGCCATGGCTC
ABO	P2	ABO_-_136130921.23-P2	ABO_-_136130959.23-P2	GGGGTGTGTGTGATTTGAGG	TCCTGTTGTGAGTAACTGAC
ABR	P1P2	ABR_+_1083212.23-P1P2	ABR_-_1083256.23-P1P2	GGCTGGGGCCGGGAGGGTTC	CAGCTGGGCTCGGCGCGGCC
ABRA	P1P2	ABRA_+_107782422.23-P1P2	ABRA_+_107782407.23-P1P2	GTCAGCAGAGAAAGACAGGT	GGAGCCATGCTGCCCACCTC
ABRACL	P1P2	ABRACL_+_139349876.23-P1P2	ABRACL_+_139349879.23-P1P2	GAAGAGAAAGACGGCTGTGG	CAGCCGTCTTTCTCTTTGCC
ABT1	P1P2	ABT1_-_26597263.23-P1P2	ABT1_+_26597412.23-P1P2	GGGAGCAAGAGCCGCTGGAA	ATGGCGAGGTCGGACGCGTC
ABTB1	P1P2	ABTB1_+_127391828.23-P1P2	ABTB1_+_127391831.23-P1P2	GCGAGCCGAACGACCTCGGG	GAGGTCGTTCGGCTCGGGTC
ABTB2	P1P2	ABTB2_-_34379521.23-P1P2	ABTB2_-_34379465.23-P1P2	GCAGGGCGCAGCGCGAGTCC	CCCTGTTCTCCCGGGATTCC
ACAA1	P1P2	ACAA1_-_38178575.23-P1P2	ACAA1_+_38178488.23-P1P2	GCCAGTCCGGGAACTGACCG	CTCAGGTGGCCCAGCACTAC
ACAA2	P1P2	ACAA2_-_47339855.23-P1P2	ACAA2_-_47339858.23-P1P2	GTCACCTCGGAGCAGAGCCA	CCATGGCTCTGCTCCGAGGC
ACACA	P1P2	ACACA_-_35715847.23-P1P2	ACACA_-_35716002.23-P1P2	GGCCGCGTGCGGGTGAGCGG	AGCAGTTCCTCCACGCAGGC
ACACB	P1	ACACB_+_109569170.23-P1	ACACB_+_109569160.23-P1	GAGGCTGACAGGCGCCCACA	TTAGTCACCCTGTGGGCGCC
ACACB	P2	ACACB_-_109592519.23-P2	ACACB_-_109592496.23-P2	GGCAAGCGCAGCGCGAAGTT	TCCCGAAATGCACCCTGCGC
ACAD10	P1P2	ACAD10_-_112123907.23-P1P2	ACAD10_-_112123894.23-P1P2	GTCGGAGCGGAAGGACGTCG	CTCCGACCTCCTCAAAATTC
ACAD11	P1P2	ACAD11_+_132379379.23-P1P2	ACAD11_-_132379444.23-P1P2	GCGCTCCACAGACTCCGCCA	GGGCAAGTTCCCGCTCCAGC
ACAD8	P1P2	ACAD8_-_134123507.23-P1P2	ACAD8_-_134123448.23-P1P2	GCGGCGGCTATGCTGTGGAG	CCGTTGCGCTCGCACTGGCC
ACAD9	P1P2	ACAD9_-_128598499.23-P1P2	ACAD9_-_128598508.23-P1P2	GTCCCTGCGGCGCTAAGAAG	CAGTCTCCCCTTCTTAGCGC
ACADL	P1P2	ACADL_-_211090095.23-P1P2	ACADL_-_211090048.23-P1P2	GCAGCTGAGGCGTCCACCTG	CGAGTCGCCGAGTAGCCGCC
ACADM	P1P2	ACADM_-_76190475.23-P1P2	ACADM_+_76190432.23-P1P2	GGCCGGAACGGGAGCCAACA	GTGTATTATTGTCCGAGTGC
ACADS	P1P2	ACADS_+_121164090.23-P1P2	ACADS_-_121163671.23-P1P2	GGCCAACCGAGGCTGAGGAG	AGGCTTCGCGACCTCCCGCC
ACADSB	P1P2	ACADSB_-_124768552.23-P1P2	ACADSB_+_124768710.23-P1P2	GGGCCTGCGGCGAGGATGGA	CAGACTCTTTACCCGCGGGC
ACADVL	P1P2	ACADVL_-_7123283.23-P1P2	ACADVL_-_7123242.23-P1P2	GGGGTCAGAGCTCGAGCCAG	ACGTCCTGGCGCCCCTAACC
ACAN	P1P2	ACAN_-_89346701.23-P1P2	ACAN_+_89346671.23-P1P2	GCTCCCCGCCGCTCCAGAGG	ACCTACCTCCCCGCCGCTCC
ACAP1	P1P2	ACAP1_+_7239854.23-P1P2	ACAP1_+_7239956.23-P1P2	GGCTCTCACCCCACACTTCC	CTCATCTCCCCTTCCTGGGC
ACAP2	P1P2	ACAP2_+_195163707.23-P1P2	ACAP2_+_195163701.23-P1P2	GTCGCGGCTGCTATGACCAG	CGCCCGCTGGTCATAGCAGC
ACAP3	P1P2	ACAP3_+_1243258.23-P1P2	ACAP3_+_1243337.23-P1P2	GCGGGCGGGACGAGCGGTCC	GTCACCGCCGGGGAGCGTCC
ACAT1	P1P2	ACAT1_+_107992310.23-P1P2	ACAT1_+_107992321.23-P1P2	GGTCGCAGAGGGCTGAGTAT	TCTGCGACCATGGCTGTGCC
ACAT2	P1P2	ACAT2_-_160183054.23-P1P2	ACAT2_-_160183095.23-P1P2	GCCGCCCGCGGCAGGCCTGT	TGCGCTGCCTGCAAGCTAGC
ACBD3	P1P2	ACBD3_-_226374403.23-P1P2	ACBD3_+_226374329.23-P1P2	GCTGCTGCACCTCCTCAGCG	TCGACGGACACCTCGAGTCC
ACBD4	P1	ACBD4_-_43213072.23-P1	ACBD4_-_43213050.23-P1	GTCAGTAGGAAGCCGCGGGG	CGGGGTCCAGCAGGGCCGGC
ACBD4	P2	ACBD4_+_43210042.23-P2	ACBD4_+_43210060.23-P2	GGAGGCTCGCCCGGACTAAG	CTGATCTTGGCCGCAAGGGC
ACBD5	P1P2	ACBD5_+_27529701.23-P1P2	ACBD5_+_27529710.23-P1P2	GCGGACTCCGGCGGAATGGG	CCGGAGTCCGTCTGTCAGTC
ACBD6	P1P2	ACBD6_-_180471707.23-P1P2	ACBD6_+_180471617.23-P1P2	GCAACGGAACAGGAGTCGAG	AGTCGACCCGGTCTCCTCCC
ACBD7	P1P2	ACBD7_+_15130776.23-P1P2	ACBD7_+_15130765.23-P1P2	GAAGCGGTGGGTGCGAGAGG	GTGCTCTGCCCCCTCTCGCC
ACCS	P1P2	ACCS_+_44088091.23-P1P2	ACCS_-_44088090.23-P1P2	GCAGATACCCGCACTCGATG	TGGAATCCCGCAAGTGGGGC
ACCSL	ENST00000378832.1	ACCSL_-_44069582.23-ENST00000378832.1	ACCSL_+_44069616.23-ENST00000378832.1	GAGAGGCCAGTAAAGATACC	TCTGGTCAGAGGAGAGGCCC
ACD	P1P2	ACD_-_67694143.23-P1P2	ACD_+_67694124.23-P1P2	GTCCCCACGGCTACACCCAG	ACGGCTACACCCAGCGGATC
ACE	P1	ACE_-_61554428.23-P1	ACE_+_61554448.23-P1	GGGCCGCGGCGCAGGAGAAG	CGTCATGGGGGCCGCCTCGC
ACE	P2	ACE_-_61562443.23-P2	ACE_+_61562272.23-P2	GCCCAAGTGGGACCATGCAG	GCTGCTCTGCTACGGGCACC
ACE2	P1P2	ACE2_-_15619013.23-P1P2	ACE2_-_15618975.23-P1P2	GTACAGCAACAAGGCTGAGA	TTGAGGAACAGGCCAAGACC
ACER1	P1P2	ACER1_-_6333545.23-P1P2	ACER1_-_6333558.23-P1P2	GTCCACCTCGGAGCTCTGAT	AGCATCTTCGCCTATCAGAC
ACER2	P1P2	ACER2_+_19409007.23-P1P2	ACER2_-_19409274.23-P1P2	GCTGCTGCGGAGGCAAAACG	ACGTCCAGCTTCCAGACGCC
ACER3	P1P2	ACER3_-_76572003.23-P1P2	ACER3_-_76571978.23-P1P2	GAGTGAGCGGAGCGCCTGGG	GGTTAGGCTGGCGACCAGGC
ACHE	P1	ACHE_+_100493473.23-P1	ACHE_-_100493486.23-P1	GAGCCTGCGCCGGGGAACAT	GGGAACATCGGCCGCCTCCC
ACHE	P2	ACHE_+_100494559.23-P2	ACHE_-_100494578.23-P2	GCTCCCACGCGGGGTCTCGG	ACGCGGGGTCTCGGGGGCTC
ACIN1	P1	ACIN1_-_23540292.23-P2	ACIN1_-_23540730.23-P2	GAGGAAGACGAAGGGAGCTA	CTCCGCCAATACAATAGAGC
ACKR2	P1P2	ACKR2_-_42851020.23-P1P2	ACKR2_-_42850976.23-P1P2	GTATGAGCTGCTATTGAACA	GTACTGTATCCTGAAAGGAC
ACKR3	P1	ACKR3_+_237478500.23-P1	ACKR3_-_237478615.23-P1	GTCCTGGCTGTGCTGTGCGC	TGCCTTCTTTCCGAGCAGAC
ACKR3	P2	ACKR3_-_237476505.23-P2	ACKR3_-_237476493.23-P2	GGTGAGTGCGGAACAAGTCT	CACTCACGCACGGCCGGGCC
ACKR4	P1P2	ACKR4_-_132316171.23-P1P2	ACKR4_-_132316167.23-P1P2	GTCTGCCGACTACAACAGGT	GTTGTAGTCGGCAGAGAGGC
ACLY	P1P2	ACLY_-_40074817.23-P1P2	ACLY_-_40075227.23-P1P2	GCGATAGCTGTGCCCGGGAG	GATCCCGGGAAGCTACCGGC
ACMSD	P1P2	ACMSD_+_135596183.23-P1P2	ACMSD_-_135596200.23-P1P2	GGAGACCTTTGTGAAAACTG	TTGTGAAAACTGTGGAGTTC
ACN9	P1P2	ACN9_+_96747061.23-P1P2	ACN9_-_96747046.23-P1P2	GGACGCGCTTGTACAATGCC	CCCCGGCATAGCGCCCCACC
ACO1	P1P2	ACO1_+_32384680.23-P1P2	ACO1_-_32384733.23-P1P2	GGCGAACCTGACCCAAGCAG	CCGACTGCACGGCGGGGCTC
ACO2	P1P2	ACO2_+_41865228.23-P1P2	ACO2_+_41865345.23-P1P2	GCAGCCGCCGGCACAGTAGG	TAGGTCAAGGCGTCCCCGGC
ACOT1	P1P2	ACOT1_-_74004062.23-P1P2	ACOT1_-_74004076.23-P1P2	GCAGCCCGAGAGGAAGAGTT	CTGCAACTCTGCCCAACTCC
ACOT11	P1	ACOT11_+_55007963.23-P2	ACOT11_-_55013950.23-P1	GAGCCAGAGGCGGGAAGCTG	AGAGACACAAGCTGGTCACC
ACOT11	P2	ACOT11_+_55007963.23-P2	ACOT11_-_55008004.23-P2	GAGCCAGAGGCGGGAAGCTG	CCGAGGTCCCCGAGCCCAGC
ACOT12	P1P2	ACOT12_-_80689897.23-P1P2	ACOT12_+_80689672.23-P1P2	GGTGCGCCGGCTGGATGGCT	CTATCCCTGGCTGCGCAGGC
ACOT13	P1P2	ACOT13_-_24667371.23-P1P2	ACOT13_-_24667329.23-P1P2	GCGGCCTCTTGCGCTCCTAG	CGGTGGTCCGCGATTTGCTC
ACOT2	P1P2	ACOT2_+_74035740.23-P1P2	ACOT2_-_74036051.23-P1P2	GTCAGAAGCTTGCTGGCCTG	TTGGTACAGCCGGGACGCTC
ACOT4	P1P2	ACOT4_+_74058647.23-P1P2	ACOT4_+_74058635.23-P1P2	GTGACATCTTGGAGCCGGAG	TTGAATTCCCCGCTCCGGCC
ACOT6	P1P2	ACOT6_+_74077704.23-P1P2	ACOT6_+_74077926.23-P1P2	GACAGAAGCCTAAGAATCAT	CCCTGCTATGTTCCCAGCTC
ACOT7	P1P2	ACOT7_-_6453406.23-P1P2	ACOT7_-_6453369.23-P1P2	GGCGGCGGGCGGCTGCAGAA	CAGCATGTCGGGCCCAGACC
ACOT8	P1P2	ACOT8_-_44486001.23-P1P2	ACOT8_-_44485992.23-P1P2	GACCCGCTCCGCGGAAGACG	CGGAGCGGGTGTGCAGGGCC
ACOT9	P1P2	ACOT9_+_23761360.23-P1P2	ACOT9_-_23761316.23-P1P2	GCCCGGGCTGTCCTCAGCAA	CCGACTAGCGCGCGGGGCCC
ACOX1	P1P2	ACOX1_+_73975227.23-P1P2	ACOX1_-_73975169.23-P1P2	GCTGCCTCCTAGGGTCCGGC	GCTGGTCGTCGCCATGAACC
ACOX2	P1	ACOX2_+_58522893.23-P1	ACOX2_+_58522888.23-P1	GAGGCTGCGGCCTACAGCCG	CTCCCCGGCTGTAGGCCGCC
ACOX2	P2	ACOX2_+_58512428.23-P2	ACOX2_-_58512435.23-P2	GTGCACAGGGTTGGTCCCTA	TATGGTGGAGGCCCCCTAAC
ACOX3	P1	ACOX3_+_8430113.23-P1	ACOX3_-_8430129.23-P1	GTAGTCCCAGTACTCCGAGT	GTACTCCGAGTCGGTCGCGC
ACOX3	P2	ACOX3_-_8442435.23-P2	ACOX3_+_8442383.23-P2	GAGCAGGAAAGGATCTCCAG	CAGTTCAACCCCTGCCAGGC
ACOXL	P1P2	ACOXL_+_111490271.23-P1P2	ACOXL_+_111490261.23-P1P2	GGAAGTCGCCGTCCAGGTAG	CCCTGCACCGCTACCTGGAC
ACP1	P1P2	ACP1_-_264970.23-P1P2	ACP1_-_264967.23-P1P2	GTCTGCGCGCGGGAAGATGG	TCTTCCCGCGCGCAGAGGCC
ACP2	P1P2	ACP2_+_47270332.23-P1P2	ACP2_+_47270309.23-P1P2	GAGATTACAACGGTGATGGC	GGCTCCAGCCGGACCGCTTC
ACP5	P1	ACP5_-_11688064.23-P1	ACP5_-_11688455.23-P1	GGCTACAAAGCGCAGGGCAG	ACCAGCCTCTCAGAGCCTCC
ACP5	P2	ACP5_-_11688064.23-P1	ACP5_-_11689771.23-P2	GGCTACAAAGCGCAGGGCAG	TCGAGCAGGGCGGATCGGCC
ACP6	P1P2	ACP6_-_147142356.23-P1P2	ACP6_-_147142348.23-P1P2	GAGACCCCGAGTGGGAACGG	ACTCGGGGTCTCCCTCAGGC
ACPL2	P1P2	ACPL2_-_140950647.23-P1P2	ACPL2_+_140950963.23-P1P2	GGGCCCCGCGAGCTCCCCGG	CTGAGCCTAGGACTTGCGCC
ACPP	P1P2	ACPP_+_132036293.23-P1P2	ACPP_+_132036344.23-P1P2	GGGGTGCAGCTCTCATGTTG	TGGCTTCTTGTTTCTGCTTC
ACPT	ENST00000270593.1	ACPT_+_51293697.23-ENST00000270593.1	ACPT_+_51293762.23-ENST00000270593.1	GCAGCAGGAGAGGTCCAGCA	TGGTGTTCGTGGCTCTGGTC
ACR	P1P2	ACR_-_51176666.23-P1P2	ACR_-_51176714.23-P1P2	GCCAGGCAGTGCCAGGAGTA	CGGACACTGCCAAGACCAGC
ACRBP	P1P2	ACRBP_+_6756569.23-P1P2	ACRBP_+_6756572.23-P1P2	GCGGCTTGGCCCGTTAGAGG	CTAACGGGCCAAGCCGCAGC
ACRC	P1P2	ACRC_-_70798376.23-P1P2	ACRC_-_70798359.23-P1P2	GAGAGGCTGCAACACCAGGT	CTGGCGTGGCCGGCAGCAGC
ACRV1	P1P2	ACRV1_+_125550697.23-P1P2	ACRV1_-_125550695.23-P1P2	GGAAGCTGTGGCCCACACTG	CTCTTTTCCTAAATCCAGAC
ACSBG1	P1P2	ACSBG1_+_78526846.23-P1P2	ACSBG1_-_78526810.23-P1P2	GTGTCTTCAGTGGAAGCCCG	ACACGGGGACCCCAGCATGC
ACSBG2	P1P2	ACSBG2_-_6135704.23-P1P2	ACSBG2_-_6135684.23-P1P2	GGGTAGAAGGCCTGTTGTGG	CATTCAACCTTCCAGAACGC
ACSF2	P1P2	ACSF2_-_48503625.23-P1P2	ACSF2_-_48503778.23-P1P2	GCGCAGGGCAAAGCGAGCCA	CCTCTCTTCCCGCGGGGGGC
ACSF3	P1P2	ACSF3_+_89160267.23-P1P2	ACSF3_-_89160263.23-P1P2	GAGTCGGGCCGGACCAGTTC	ACAGCTTCCCCGGCGCGGCC
ACSL1	P1P2	ACSL1_+_185746700.23-P1P2	ACSL1_+_185747071.23-P1P2	GCCGCGCTTCGGCTGGGAGG	CCGTGGACCGGCCGCTCCGC
ACSL3	P1P2	ACSL3_-_223725834.23-P1P2	ACSL3_+_223725692.23-P1P2	GGACGAGGAGGCGTTGGACG	CTCTGCATAGGCAACGAGTC
ACSL4	P1P2	ACSL4_-_108976456.23-P1P2	ACSL4_+_108976382.23-P1P2	GACCGCGTGCCCGCTAGCGC	CGTCTTCGCAGCCGGCCGGC
ACSL5	P1	ACSL5_-_114136040.23-P1	ACSL5_-_114136013.23-P1	GTCAGAGCAGGGCAGAACTG	GAGTCAGGCCATGTCAGGCC
ACSL5	P2	ACSL5_-_114133956.23-P2	ACSL5_-_114133923.23-P2	GGAGTAGAAGTGCCTGAATG	AGGACTGACTGGGACACACC
ACSL6	P1	ACSL6_-_131347437.23-P1	ACSL6_-_131347379.23-P1	GCGGCTCAAGGGGGAGGGCG	GAGGGCGGGGGCTAAAAATC
ACSL6	P2	ACSL6_-_131347437.23-P1	ACSL6_-_131310682.23-P2	GCGGCTCAAGGGGGAGGGCG	ATGCCCGTCGCCTGCAGAAC
ACSM1	P1P2	ACSM1_-_20687076.23-P1P2	ACSM1_-_20687521.23-P1P2	GTAGCCCTGGAAGACAGCCA	GACCTGAGACACCCTCCCTC
ACSM2A	P1P2	ACSM2A_-_20463283.23-P1P2	ACSM2A_-_20462920.23-P1P2	GAGAGAAGGATGAATCTCAG	TGGAAGAGAGCACAGTAACC
ACSM2B	P1P2	ACSM2B_+_20587573.23-P1P2	ACSM2B_-_20587615.23-P1P2	GAGCTGCTGGCTGGAGAGGA	AGGCTGTAGGAGTTCTGGAC
ACSM3	P1P2	ACSM3_+_20775331.23-P1P2	ACSM3_+_20775412.23-P1P2	GCGTGGCAGTCTAAAGAAGA	TAATCTCCATCTGTGTTGGC
ACSM4	ENST00000399422.4	ACSM4_-_7456922.23-ENST00000399422.4	ACSM4_+_7456915.23-ENST00000399422.4	GGCAGTAGACAAAGTCCTTT	TTGGGAACCATGAAGATTTC
ACSM5	P1P2	ACSM5_-_20421144.23-P1P2	ACSM5_-_20420881.23-P1P2	GAGGTGGCTGAGGAATCCAG	ACAGGGAACTTCAGCCCCAC
ACSS1	P1P2	ACSS1_+_25038767.23-P1P2	ACSS1_+_25038734.23-P1P2	GGGCGTGAGGCACCCACTCT	TCTAGGCAGGCTACCTGAGC
ACSS2	P1P2	ACSS2_-_33464845.23-P1P2	ACSS2_-_33464420.23-P1P2	GTGCAGACTTGGAGGGTCCG	TTGCGGTCGCGGCGGGTGCC
ACSS3	P1P2	ACSS3_-_81471913.23-P1P2	ACSS3_-_81471886.23-P1P2	GGGAGGAGATGAAACCGTCT	GCGGTCCCCGAGTGTGCGAC
ACTA1	P1	ACTA1_+_229569796.23-P1	ACTA1_+_229569744.23-P1	GAAGCCTCGCTTCCCCTCCG	TACCTGGGCGGGTAGCTACC
ACTA1	P2	ACTA1_+_229569796.23-P1	ACTA1_-_229568745.23-P2	GAAGCCTCGCTTCCCCTCCG	CCGACACCAGGTCAGGCTGC
ACTA2	P1	ACTA2_+_90750678.23-P2	ACTA2_-_90712506.23-P1	GACGGGGTAAGCCTCCACCC	AGCCAAGCACTGTCAGGGTC
ACTA2	P2	ACTA2_+_90750678.23-P2	ACTA2_+_90751072.23-P2	GACGGGGTAAGCCTCCACCC	TGACAAGCCAAGCCAAAGGC
ACTB	P1P2	ACTB_-_5570191.23-P1P2	ACTB_+_5570130.23-P1P2	GACGGGCGGCGGATCGGCAA	CGGTCGGCTGGCCGGGCTTC
ACTBL2	P1P2	ACTBL2_-_56778433.23-P1P2	ACTBL2_-_56778438.23-P1P2	GTGTCGAGGACGCCCTATCA	CTCCATGATAGGGCGTCCTC
ACTC1	P1P2	ACTC1_-_35087711.23-P1P2	ACTC1_-_35087685.23-P1P2	GCCGGGCGCTGACTCACCGT	CGTTCACTCCTCGCCTGGTC
ACTG1	P1P2	ACTG1_-_79479777.23-P1P2	ACTG1_-_79479816.23-P1P2	GCACCGGCAGAGAAACGCGA	CTGCCAGCTCTCGCACTCTC
ACTG2	P1	ACTG2_+_74120202.23-P1	ACTG2_-_74120192.23-P1	GGGCAGCCCCGGAAAGGAAG	TACAGTACTTACCGAGGGTC
ACTG2	P2	ACTG2_+_74128454.23-P2	ACTG2_+_74128598.23-P2	GTTGTCACACACGAGCGCGG	CTAGGAGTAAGCGCTGCACC
ACTL10	P1P2	ACTL10_+_32254796.23-P1P2	ACTL10_-_32254768.23-P1P2	GCCTCCCGGCCTCTGTCCTA	CCGGAGCCTAAGTTCTTCCC
ACTL6A	P1P2	ACTL6A_-_179280784.23-P1P2	ACTL6A_-_179280860.23-P1P2	GGGGTGGCGGTGGAAGTTAA	ACCCTAAGGGCTAACTGGCC
ACTL6B	P1P2	ACTL6B_+_100253966.23-P1P2	ACTL6B_+_100253969.23-P1P2	GCAGCGGGCACTATGAGCGG	CTCATAGTGCCCGCTGCGCC
ACTL7A	P1P2	ACTL7A_-_111624608.23-P1P2	ACTL7A_-_111624563.23-P1P2	GGCGGCTCTTGACAACATGT	ACTGGATTCAAGGCCTGAAC
ACTL7B	P1P2	ACTL7B_-_111618185.23-P1P2	ACTL7B_+_111618198.23-P1P2	GCACCCTGAGCCGTGCCCAG	TGTCGCCATCTGCCTCCCTC
ACTL8	P1P2	ACTL8_-_18081836.23-P1P2	ACTL8_+_18081845.23-P1P2	GTGCCACGTGCTCACAGAGT	CGTGCAGCCGCTCTCGTGCC
ACTL9	P1P2	ACTL9_-_8809073.23-P1P2	ACTL9_+_8808881.23-P1P2	GGTTGCGGGACGCCAGGTGA	ATGTCAATAACCACCACGCC
ACTN1	P1P2	ACTN1_-_69445956.23-P1P2	ACTN1_-_69445944.23-P1P2	GCTGCTACTGGCGGCGACAG	GTAGCAGCCTTCGCCAGCAC
ACTN2	P1P2	ACTN2_+_236849841.23-P1P2	ACTN2_+_236849796.23-P1P2	GCCTTCGCGCGGCTCCTCTC	GAGCTGGTGCTTCGCCCGAC
ACTN3	P1P2	ACTN3_-_66314441.23-P1P2	ACTN3_+_66313715.23-P1P2	GATGCAGCCCGAGGGTCTGG	ACCCTGGAGGCTCCTCCCAC
ACTN4	P1P2	ACTN4_-_39138358.23-P1P2	ACTN4_-_39138303.23-P1P2	GAGCTGAGGCGGGAGCGGAC	CTTCAGCTGCTTCAGCCCGC
ACTR1A	P1P2	ACTR1A_+_104262452.23-P1P2	ACTR1A_+_104262449.23-P1P2	GTGCGTGTCAGTGGCGCTAG	CCGCTAGCGCCACTGACACC
ACTR1B	P1P2	ACTR1B_-_98280407.23-P1P2	ACTR1B_+_98280464.23-P1P2	GGCTGCAGGAGGCACCGGAT	CCCCGAGCCTGCAGCCTACC
ACTR2	P1P2	ACTR2_-_65454971.23-P1P2	ACTR2_-_65454953.23-P1P2	GGGGGCCGGGAAGACGCAAG	CTCCTTCGGCCCAACTTTTC
ACTR3	P1P2	ACTR3_+_114647775.23-P1P2	ACTR3_-_114647751.23-P1P2	GGATTGGCGGCGGGAGACAA	CCTTCACCGTCCGGGGGGTC
ACTR3B	P1P2	ACTR3B_-_152456898.23-P1P2	ACTR3B_-_152456932.23-P1P2	GACGCTGCGCGCGGGGCTAG	GAGAGCGCCCCGTCGCCGTC
ACTR3C	P1P2	ACTR3C_+_150020638.23-P1P2	ACTR3C_+_150020641.23-P1P2	GTCCCCGCTTACCTGAGGGG	CTCAGGTAAGCGGGGACTGC
ACTR5	P1P2	ACTR5_+_37377158.23-P1P2	ACTR5_-_37377178.23-P1P2	GTCCAGCACTGGGTCCGGTG	GCACTGGGTCCGGTGCGGCC
ACTR8	P1P2	ACTR8_+_53916142.23-P1P2	ACTR8_+_53916157.23-P1P2	GGCTGAGGCGAGAGGTTGGT	CAGCGCTGCAGCCACGACTC
ACTRT1	P1P2	ACTRT1_+_127186306.23-P1P2	ACTRT1_+_127186328.23-P1P2	GTAGCCTACTAGCTGTACAT	TCAGTCCACCAGGACACCCC
ACTRT2	P1P2	ACTRT2_-_2938118.23-P1P2	ACTRT2_+_2938135.23-P1P2	GCTGAGGATGCAGGGCTCCC	TGAGACACCCCGAGAGCTGC
ACTRT3	P1P2	ACTRT3_+_169487327.23-P1P2	ACTRT3_+_169487342.23-P1P2	GAGAGCGGCTCAGAGACAGG	CTCTAGCTACGGGCTCGGCC
ACVR1	P1P2	ACVR1_+_158732232.23-P1P2	ACVR1_+_158732079.23-P1P2	GGGTAGCCTAGCGGGAGAAG	CCCATATCCCACCAGCAGTC
ACVR1B	P1P2	ACVR1B_-_52345530.23-P1P2	ACVR1B_+_52345561.23-P1P2	GGCGGCGGCGGTGGTTACTA	TTGTTGTCCTCCTGCTCGCC
ACVR1C	P1P2	ACVR1C_+_158485339.23-P1P2	ACVR1C_-_158485307.23-P1P2	GGCGCACCGCCAGCCGCAGG	ACACTGACTAGAGCCAACCC
ACVR2A	P1P2	ACVR2A_+_148602343.23-P1P2	ACVR2A_-_148602102.23-P1P2	GGGCTGAGGCGACGAAGAGG	CGTTTTCGGTCTCCTGGCCC
ACVR2B	P1P2	ACVR2B_+_38495339.23-P1P2	ACVR2B_+_38495606.23-P1P2	GTGGATACAAAGAGGCGGGC	CAGCGGCCCTGAGCCCGGCC
ACVRL1	P1P2	ACVRL1_-_52300776.23-P1P2	ACVRL1_+_52300726.23-P1P2	GGGACCCCCGGGCTGAGGGT	TCATTGCTGCAAGCCTCCTC
ACY1	P1P2	ACY1_-_52017547.23-P1P2	ACY1_-_52017631.23-P1P2	GCTCGCTGGACCCTAAGTCC	TCTATCCCTCCCCAGGGCCC
ACY3	P1	ACY3_-_67418149.23-P1	ACY3_+_67418110.23-P1	GCGCCCTACCCCCGAAACAG	GTGGGGCTGTCACTCCGCCC
ACY3	P2	ACY3_+_67414985.23-P2	ACY3_-_67414970.23-P2	GAAGCCCAGATCCGCATCAG	GAGACCCCTGCACCAGCTGC
ACYP1	P1	ACYP1_-_75530711.23-P1	ACYP1_-_75530695.23-P1	GTCCGGGACCACCACGCCAA	GGAGTGATCCTGGCAGCCGC
ACYP1	P2	ACYP1_-_75536179.23-P2	ACYP1_-_75536194.23-P2	GCTGGACCGAGCTGCAGAGT	GTCAGTGTCCGGCCAACTCC
ACYP2	P1P2	ACYP2_-_54342821.23-P1P2	ACYP2_+_54342748.23-P1P2	GCTCTCCGGCTCCTCAACAG	ATGTGTCCCCTCCCTCTCGC
ADA	P1P2	ADA_+_43280285.23-P1P2	ADA_+_43280282.23-P1P2	GCCGGCAGAGACCCACCGAG	CCGCTCGGTGGGTCTCTGCC
ADAD1	P1P2	ADAD1_-_123300726.23-P1P2	ADAD1_-_123300755.23-P1P2	GCAGAGCGGCCTGAAGCGAG	CCGTTGCTCCCACCTCCCAC
ADAD2	P1P2	ADAD2_-_84224870.23-P1P2	ADAD2_+_84224814.23-P1P2	GCTCAGGGCGCTGACGACGA	CAGATCTTCGTTGGCGGCCC
ADAL	P1P2	ADAL_-_43623140.23-P1P2	ADAL_-_43623106.23-P1P2	GCCAAGAAGGGTCGGCACCA	TCCTTGGCGGTCCAAGGAAC
ADAM10	P1P2	ADAM10_+_59041886.23-P1P2	ADAM10_-_59041703.23-P1P2	GGCGTTGCCGGCCCCTGAAG	CTCCTGGGCGGCGGGGATGC
ADAM11	P1P2	ADAM11_+_42836787.23-P1P2	ADAM11_-_42836572.23-P1P2	GCGGCCAGCTGGGGACAGGT	CATGGCTCGCTCATTCCTCC
ADAM12	P1P2	ADAM12_-_128077031.23-P1P2	ADAM12_-_128077010.23-P1P2	GGAAGAGCGTTAGTGAGAGA	AGTCCCCGGGCCAACTCGGC
ADAM15	P1P2	ADAM15_+_155023841.23-P1P2	ADAM15_+_155023860.23-P1P2	GTGGCAGCGGCGCTCCGGGC	TGCGGCTGGCGCTGCTCTGC
ADAM17	P1P2	ADAM17_-_9695930.23-P1P2	ADAM17_+_9695837.23-P1P2	GGTGCAGGTGGCGTTACCAA	CTCAATCCTCTTTTCCCTCC
ADAM18	P1P2	ADAM18_-_39442196.23-P1P2	ADAM18_+_39442286.23-P1P2	GGAAGACTGCAAGCCCACGA	CCTCTCCCTTCTGGGATCCC
ADAM19	P1P2	ADAM19_+_157002746.23-P1P2	ADAM19_+_157002739.23-P1P2	GGCCGGGCAGTGGGCAGGTA	TCAGCCATACCTGCCCACTC
ADAM2	P1P2	ADAM2_-_39695635.23-P1P2	ADAM2_-_39695737.23-P1P2	GTCCCAAAAGGCCAGAGGAG	TTATTCCGGCTGGGACCCAC
ADAM20	P1P2	ADAM20_-_71001696.23-P1P2	ADAM20_+_71001702.23-P1P2	GGGGAATCTGAGATTGATGT	TAGTCTTAAACACACTGCTC
ADAM21	P1P2	ADAM21_+_70918885.23-P1P2	ADAM21_-_70918928.23-P1P2	GAGCTGAGGCCACAGAACAA	TGCTTTATCAATGGTTTGTC
ADAM22	P1P2	ADAM22_+_87563621.23-P1P2	ADAM22_-_87563632.23-P1P2	GGGCGCTGCAACCTCCACCG	CCACCGCGGCTCAGTGCTGC
ADAM23	P1P2	ADAM23_+_207308275.23-P1P2	ADAM23_-_207308295.23-P1P2	GGCCGCTTCAGCGACTGCGG	CTTCAGCGACTGCGGGGGCC
ADAM28	P1P2	ADAM28_+_24151604.23-P1P2	ADAM28_+_24151646.23-P1P2	GCGCTCAGGTGGGTGCTGCT	GGAATCACCCAGCATGTTGC
ADAM29	P1P2	ADAM29_+_175839643.23-P1P2	ADAM29_+_175839773.23-P1P2	GTGTGTAAAGAGTACAGGTA	AAACTTGCCCCATACCCTCC
ADAM30	P1P2	ADAM30_+_120439094.23-P1P2	ADAM30_-_120439090.23-P1P2	GACCGAGCCCTGGGAGGCTA	CCGGAAACCCTGCCAGGGGC
ADAM32	P1P2	ADAM32_+_38965299.23-P1P2	ADAM32_+_38965287.23-P1P2	GGGCCAGCAGCAACCAGAGG	CACCATGTTCCGCCTCTGGC
ADAM33	P1P2	ADAM33_-_3662638.23-P1P2	ADAM33_+_3662647.23-P1P2	GGGGTCCCCCGAGCTCTCCG	TAGCTGTGAGCTCCTCGGCC
ADAM7	P1P2	ADAM7_-_24298561.23-P1P2	ADAM7_-_24298558.23-P1P2	GCCCTGCAGTGGAAGTGAGG	CACTTCCACTGCAGGGATGC
ADAM8	P1P2	ADAM8_-_135090331.23-P1P2	ADAM8_-_135090322.23-P1P2	GAGGCCGCGCATGGCCGGGT	TGCGCGGCCTCGGGCTCTGC
ADAM9	P1P2	ADAM9_-_38854499.23-P1P2	ADAM9_-_38854561.23-P1P2	GGCGCTTCCCGGCCAGACTT	CTCAGCACTCGGTCGCCTCC
ADAMDEC1	P1P2	ADAMDEC1_+_24242054.23-P1P2	ADAMDEC1_+_24242051.23-P1P2	GGGCAGCAGGACCCAAGACA	CCATGTCTTGGGTCCTGCTC
ADAMTS1	P1	ADAMTS1_+_28217664.23-P1	ADAMTS1_+_28217658.23-P1	GGCCAGGGTGCGCTACCGGA	TCTCCGTCCGGTAGCGCACC
ADAMTS1	P2	ADAMTS1_+_28216554.23-P2	ADAMTS1_+_28216594.23-P2	GACCCGGCACTGCAAGGCGT	CTTCGTCCTCGCCCTCAGTC
ADAMTS10	P1P2	ADAMTS10_+_8675562.23-P1P2	ADAMTS10_+_8675559.23-P1P2	GGCGCGGGGCGGCGAGACAG	CCGCTGTCTCGCCGCCCCGC
ADAMTS12	P1P2	ADAMTS12_-_33892078.23-P1P2	ADAMTS12_+_33892096.23-P1P2	GTGCATGGTCAGGCGCGAGA	GCGATCTCCCTGTGCTTTTC
ADAMTS13	P1P2	ADAMTS13_+_136287556.23-P1P2	ADAMTS13_-_136287562.23-P1P2	GGTGACGCTGGTGCATCCTC	CAGGAGAGCCAGCCCGAGGC
ADAMTS14	P1P2	ADAMTS14_-_72432303.23-P1P2	ADAMTS14_-_72432297.23-P1P2	GACCAGCCGGCAGTTGGCAC	ACTGCCGGCTGGTCGGTCAC
ADAMTS15	P1P2	ADAMTS15_+_130318737.23-P1P2	ADAMTS15_+_130318578.23-P1P2	GCAGCCGGCAGTTCCCAGAA	TCCGCTAGTTCTCGGCTGCC
ADAMTS16	P1	ADAMTS16_+_5146341.23-P1	ADAMTS16_+_5146377.23-P1	GAGGTGAAGAGACTCAACCT	GGCACGACTTCCACATGGAC
ADAMTS16	P2	ADAMTS16_+_5140497.23-P2	ADAMTS16_+_5140486.23-P2	GGGCAGGGAGGACCCGACCC	GCGCTCTGCCTGGGTCGGGC
ADAMTS17	P1P2	ADAMTS17_+_100882122.23-P1P2	ADAMTS17_-_100882166.23-P1P2	GTCGCCGCCACGGTCCGGGG	CCGCCTAGCGCGCTCCTGCC
ADAMTS18	P1P2	ADAMTS18_+_77468890.23-P1P2	ADAMTS18_-_77468873.23-P1P2	GGACAGACGCACAGACGGGC	AACCGTTTGCGCTCCAGTCC
ADAMTS19	P1P2	ADAMTS19_+_128796021.23-P1P2	ADAMTS19_+_128796013.23-P1P2	GTCCAGCGCGATCCACTCCG	CTGCGCCCCGGAGTGGATCC
ADAMTS2	P1P2	ADAMTS2_-_178772408.23-P1P2	ADAMTS2_-_178772444.23-P1P2	GGCCGCCCAGCCCACATCTG	TGCGGTGCTGCAGCTGCGGC
ADAMTS20	P1P2	ADAMTS20_+_43945953.23-P1P2	ADAMTS20_+_43945912.23-P1P2	GGAGTTTCTGAGGGCAGCGC	CTGCTTCATCGCACTGCAGC
ADAMTS3	P1P2	ADAMTS3_-_73434891.23-P1P2	ADAMTS3_-_73434871.23-P1P2	GGGTTCCCCGGAGCACAGCA	AAGCATTCTCCGCGCTAACC
ADAMTS4	P1P2	ADAMTS4_+_161168828.23-P1P2	ADAMTS4_-_161168836.23-P1P2	GAGGCTGGGGAGAACCCACA	ACAGGGAGACCCACAGACAC
ADAMTS5	P1P2	ADAMTS5_-_28339372.23-P1P2	ADAMTS5_-_28339421.23-P1P2	GGCCCGCCGTCATCCCCAGT	CCTCGCATCTTCACAGCGCC
ADAMTS6	P1P2	ADAMTS6_+_64777661.23-P1P2	ADAMTS6_-_64777602.23-P1P2	GGGGCCGGTAGTGAGATCTA	TTTGATGCTCTGCACATGTC
ADAMTS7	P1P2	ADAMTS7_-_79103729.23-P1P2	ADAMTS7_+_79103613.23-P1P2	GCTCGGTCCGCGGGCAACAA	GTCCGGTCGCTGCCTGGTCC
ADAMTS8	P1P2	ADAMTS8_-_130298510.23-P1P2	ADAMTS8_+_130298490.23-P1P2	GACCCCGGGAAGCACCGAGT	CGGGAAGCACCGAGTGGGCC
ADAMTS9	P1P2	ADAMTS9_+_64673035.23-P1P2	ADAMTS9_-_64673631.23-P1P2	GTTGCTAGGGAGGGACACTA	GCCCGCTCGCTGGGCATTAC
ADAMTSL1	P1P2	ADAMTSL1_+_18474201.23-P1P2	ADAMTSL1_-_18474157.23-P1P2	GTCCTTGCCGGAATCAGAAT	GTACTGGTGCTAACACTCCC
ADAMTSL2	P1P2	ADAMTSL2_-_136399861.23-P1P2	ADAMTSL2_+_136399841.23-P1P2	GTCCCGGGAACCCCCTCTCT	GGGAACCCCCTCTCTTGGAC
ADAMTSL3	P1P2	ADAMTSL3_-_84323067.23-P1P2	ADAMTSL3_-_84322944.23-P1P2	GGCGCAGGGCGGCCCCTCAG	GTCAACACCTCGTGCGGAAC
ADAMTSL4	P1P2	ADAMTSL4_-_150521934.23-P1P2	ADAMTSL4_+_150521916.23-P1P2	GTTGCCTGGAGAGAGCGCCT	GGAGAGAGCGCCTGGGCGCC
ADAMTSL5	P1P2	ADAMTSL5_-_1512947.23-P1P2	ADAMTSL5_-_1512963.23-P1P2	GCCGGAGAAAGTGGGAGGAT	GTAAGTCCATCTGCCTATCC
ADAP1	P1P2	ADAP1_+_994282.23-P1P2	ADAP1_+_994276.23-P1P2	GACCGCGGCGGAGACACGAG	CCGCCGCTCGTGTCTCCGCC
ADAP2	P1P2	ADAP2_-_29249001.23-P1P2	ADAP2_+_29249009.23-P1P2	GGGCGGAGCGCACGGGCCAT	CTGAGCCCGCCGGGCCGGCC
ADAR	P1	ADAR_-_154580605.23-P1	ADAR_-_154580629.23-P1	GCGCACTGGAAGTGGCCCCG	GCGGAGTTTCCCGTGCCGAC
ADARB1	P1P2	ADARB1_-_46494561.23-P1P2	ADARB1_+_46494897.23-P1P2	GGGCGGCCAAGCGGCCAGGT	GTCTGCTCCGGCGCTCGGCC
ADARB2	ENST00000381312.1	ADARB2_+_1779687.23-ENST00000381312.1	ADARB2_-_1779460.23-ENST00000381312.1	GGGTGCCAAACAACTAGCAG	CTCCCGGGTTTGCAACCTCC
ADAT1	P1P2	ADAT1_+_75657125.23-P1P2	ADAT1_+_75656919.23-P1P2	GCGTTTCCTGAAGGTGGGAG	TTGGGTCCTGCGGCTGCCAC
ADAT2	P1P2	ADAT2_-_143771826.23-P1P2	ADAT2_+_143771782.23-P1P2	GCACTCAGCTACAGAGCCCG	TCGCCTCCATACCCAGCCAC
ADAT3	P1	ADAT3_-_1905438.23-P1	ADAT3_-_1905405.23-P1	GGCTCGCGCCCGGATCCCTC	AGTCTTAGCAACCGGCCCGC
ADAT3	P2	ADAT3_-_1905438.23-P1	ADAT3_+_1908001.23-P2	GGCTCGCGCCCGGATCCCTC	CCTCTCTGGGTCGTTTGTTC
ADC	P1P2	ADC_-_33546826.23-P1P2	ADC_-_33546829.23-P1P2	GGCCCGGGGAAGCGAGAGAG	CCGCTCTCTCGCTTCCCCGC
ADCK1	P1P2	ADCK1_-_78266523.23-P1P2	ADCK1_-_78266512.23-P1P2	GCTTCCCTCGGGGTGAGTAG	GAGGGAAGCAGAGCCGCGGC
ADCK2	P1P2	ADCK2_+_140372748.23-P1P2	ADCK2_+_140372768.23-P1P2	GGGCCAGTATGAGATCGCTG	CTGGGCGCACGGTGACCCTC
ADCK3	P1P2	ADCK3_-_227128046.23-P1P2	ADCK3_-_227128055.23-P1P2	GCGCGGTGGCCAGCGCGCAG	CGCCCGCCTCTGCGCGCTGC
ADCK4	P1P2	ADCK4_+_41222752.23-P1P2	ADCK4_-_41222769.23-P1P2	GGCGGCCAGGTATGCATCTA	GGTATGCATCTAGGGCACCC
ADCK5	P1P2	ADCK5_+_145597793.23-P1P2	ADCK5_-_145597781.23-P1P2	GGGGCCGGGAGAGTCCTCAC	ACCACTGCTCCGCTCTTCTC
ADCY1	P1P2	ADCY1_+_45614267.23-P1P2	ADCY1_-_45614293.23-P1P2	GGAACAGCGCCTCCAGCTCT	CGGAACAGCGCCTCCAGCTC
ADCY10	P1P2	ADCY10_+_167883329.23-P1P2	ADCY10_-_167882911.23-P1P2	GGGTCAGCTATAGACAGACA	ACCTCTTGAAGGGGGCTCTC
ADCY2	P1P2	ADCY2_-_7396414.23-P1P2	ADCY2_-_7396463.23-P1P2	GCCTGTGAGCGGCCCCGATG	CCTCGGAGCGGTCCCGCAGC
ADCY3	P1P2	ADCY3_-_25143044.23-P1P2	ADCY3_-_25142849.23-P1P2	GAGCCGAGCCAGCCGAGTCC	CTGAGCCTCAGCCCCAGGGC
ADCY4	P1P2	ADCY4_-_24804227.23-P1P2	ADCY4_-_24804233.23-P1P2	GCAGCGGAGTGGGCTAGGTC	TCCCCGGACCTAGCCCACTC
ADCY5	P1P2	ADCY5_+_123168382.23-P1P2	ADCY5_-_123168354.23-P1P2	GCTGCGTCGGGGCAGAACCG	AGTCGTTCCGCGCCGGCCGC
ADCY6	P1P2	ADCY6_+_49182840.23-P1P2	ADCY6_+_49182614.23-P1P2	GTGCGCTGGACAGCTCGGGA	CTCGGGTGCGTTCCAATCCC
ADCY7	P1P2	ADCY7_-_50300524.23-P1P2	ADCY7_-_50300498.23-P1P2	GCCTGGGCGCGTCTGAGGAA	ATCCGAAGGCTCCTTCCACC
ADCY8	P1P2	ADCY8_-_132053083.23-P1P2	ADCY8_-_132053093.23-P1P2	GCCTGGCCGGCGGTGACCGG	ATCGCTGCCGCCGGTCACCC
ADCY9	P1P2	ADCY9_-_4166392.23-P1P2	ADCY9_+_4166432.23-P1P2	GCGCGGCCGCTGCCTCATGT	CTGTCACTGACAGACGCGCC
ADCYAP1	P1P2	ADCYAP1_-_904591.23-P1P2	ADCYAP1_-_904647.23-P1P2	GGAGGCAGCCGGAGAGACCT	TTGTAGGAGCCGCGGGCCAC
ADCYAP1R1	P1P2	ADCYAP1R1_-_31091992.23-P1P2	ADCYAP1R1_-_31092299.23-P1P2	GCCGCAGGACGGAGCCAAGC	TTACCTGCTCACTGCGGGGC
ADD1	P1P2	ADD1_-_2845605.23-P1P2	ADD1_-_2845599.23-P1P2	GCACCCAGGTCGGGCGGTGG	CCCGACCTGGGTGCGGCCTC
ADD2	P1P2	ADD2_+_70995263.23-P1P2	ADD2_+_70995300.23-P1P2	GCAGGGCTGTGAGGGACTAG	TTTCCCGCACGAGGCTGGGC
ADD3	P1P2	ADD3_-_111767767.23-P1P2	ADD3_-_111767783.23-P1P2	GGCGAGCCGCCAGCCCGTAA	CTCACACTGGCGACCGTTAC
ADGB	P1P2	ADGB_+_146920153.23-P1P2	ADGB_-_146920345.23-P1P2	GGCAGAAGCCGATCTATGTA	TGGCACAGTTTGCTGCAGGC
ADH1A	P1P2	ADH1A_+_100212094.23-P1P2	ADH1A_-_100212162.23-P1P2	GCAAGGACTCACCAGTCTCC	ATGCAATACACCTGCTTTAC
ADH1B	P1P2	ADH1B_+_100242511.23-P1P2	ADH1B_-_100242333.23-P1P2	GACAAAGACTCACAGTCTGC	CAATATGTAATGTATACTGC
ADH1C	P1P2	ADH1C_-_100273879.23-P1P2	ADH1C_-_100273923.23-P1P2	GGGAGGCTGGTGAGTACTTG	GTGCAACATACCTGCTTTAC
ADH4	P1P2	ADH4_+_100065429.23-P1P2	ADH4_+_100065433.23-P1P2	GGACACGGAACTCCCTGGGT	AGGGAGTTCCGTGTCCTATC
ADH5	P1P2	ADH5_+_100009821.23-P1P2	ADH5_+_100009684.23-P1P2	GCGAGGTAGGGCCCGTTGAG	CTCTGAGCCGCTCGCTGGGC
ADH6	P1P2	ADH6_-_100140386.23-P1P2	ADH6_+_100140286.23-P1P2	GTTCACTGTAGAAAGTACAA	ACTTGGCCTGTAGTACACAC
ADH7	P1P2	ADH7_+_100356481.23-P1P2	ADH7_+_100356385.23-P1P2	GAGCCAGACTATCTATGTGA	ATCCTGTCTTTGTCTTGGAC
ADHFE1	P1P2	ADHFE1_-_67344732.23-P1P2	ADHFE1_-_67344792.23-P1P2	GCGGTGTAGCGACCCGAGGA	CAGCAAGTACGCGACCCGGC
ADI1	P1P2	ADI1_+_3523275.23-P1P2	ADI1_-_3523293.23-P1P2	GCGGCCCCTGGGTTCGAACA	CTGGGTTCGAACACGGCACC
ADIG	P1P2	ADIG_+_37209911.23-P1P2	ADIG_+_37209902.23-P1P2	GATGTGAGGTCGTTCACCAG	TTGATGCCGCTGGTGAACGC
ADIPOQ	P1P2	ADIPOQ_+_186560526.23-P1P2	ADIPOQ_+_186560448.23-P1P2	GTTGCTCTTACCCTCTGGTA	CCGTGAGTACCAGGCTGTTC
ADIPOR1	P1P2	ADIPOR1_+_202927394.23-P1P2	ADIPOR1_-_202927375.23-P1P2	GGGGAGGGCGCTGAAGATCG	CCAGCGCCGCGGGATGTAGC
ADIPOR2	P1P2	ADIPOR2_-_1800242.23-P1P2	ADIPOR2_-_1800278.23-P1P2	GGAGAGCGCGATTCCAGAAG	GGTGTAGCCGCCGCCGCTGC
ADIRF	P1P2	ADIRF_-_88728314.23-P1P2	ADIRF_-_88728245.23-P1P2	GCCGAAGCCATGGCAAGCAA	AGAGTGGCGATGCCAAGCGC
ADK	P1	ADK_-_75936578.23-P1	ADK_+_75936517.23-P1	GGTACCTGCTGCTGCCCGAG	AGTCGCTGAGTGCCTGAGCC
ADK	P2	ADK_-_75911025.23-P2	ADK_-_75911021.23-P2	GCTGTAGAGCCAAAGTGGGG	ACTTTGGCTCTACAGCCCAC
ADM	P1P2	ADM_+_10327266.23-P1P2	ADM_+_10326660.23-P1P2	GAGCGAACCCAGGTACATCA	TGCCACTTCGGGCTTCTCAC
ADM2	P1P2	ADM2_-_50920028.23-P1P2	ADM2_+_50920011.23-P1P2	GCGGGCCGCGACTCCGCTCC	CGACTCCGCTCCAGGCAGGC
ADM5	P1P2	ADM5_+_50191862.23-P1P2	ADM5_+_50191867.23-P1P2	GCCGAGAAGGAACCAAGGAA	TGGTTCCTTCTCGGGGTCCC
ADNP	P1P2	ADNP_+_49547361.23-P1P2	ADNP_-_49547707.23-P1P2	GGCGCCTCGAGGCCGAGTCA	CTCTCGGTCCCCGCTGCTGC
ADNP2	P1P2	ADNP2_-_77867648.23-P1P2	ADNP2_+_77867421.23-P1P2	GCCCCGGGAGGGCGGAGAAG	CAGTCTGGTCCCCTCCGAGC
ADO	P1P2	ADO_-_64564781.23-P1P2	ADO_-_64564623.23-P1P2	GACCGCAAGGGGCGGAGGAA	CCTCTGAGCGCGCACGCGCC
ADORA1	P1P2	ADORA1_+_203097472.23-P1P2	ADORA1_+_203097450.23-P1P2	GGGCCGCGCGCGGTAGGGCT	CGCGTTGTCCAGAGCCCAGC
ADORA2A	P1P2	ADORA2A_-_24819888.23-P1P2	ADORA2A_-_24819903.23-P1P2	GGCCGGAGCCGGAGACCCAG	CTGTCTCGGCGGCCGCTGGC
ADORA2B	P1P2	ADORA2B_-_15848791.23-P1P2	ADORA2B_+_15848650.23-P1P2	GGCTTCTGCACTGACTTCTA	CGGTGGGCACGGCGAACACC
ADORA3	P1	ADORA3_+_112031411.23-P1	ADORA3_+_112031386.23-P1	GGCCTGACCAAAGAGGACAC	CTGGATGCCACACCAGTACC
ADORA3	P2	ADORA3_-_112046251.23-P2	ADORA3_+_112046115.23-P2	GGCTGTAGGACAGCTCTATA	ACCCTTTTCTGGTGGGGTGC
ADPGK	P1P2	ADPGK_+_73076082.23-P1P2	ADPGK_+_73076066.23-P1P2	GCGCGCGCCGAGCCCGGAAG	TTCCTAGCCCGCGCCTCTTC
ADPRH	P1P2	ADPRH_+_119298491.23-P1P2	ADPRH_+_119298604.23-P1P2	GGCGCTGAGTGAGCTAATCT	TCGTCCACCCGCAGCAGCCC
ADPRHL1	P1	ADPRHL1_+_114107736.23-P1	ADPRHL1_+_114107533.23-P1	GCCTGGGATGGAGAAATTTA	ACCTGTGGTGAGGGCCTCGC
ADPRHL1	P2	ADPRHL1_-_114103424.23-P2	ADPRHL1_-_114103435.23-P2	GTCTTGTAGAGCGCTAGACA	GGAAGTAGCCGTGTCTAGCC
ADPRHL2	P1P2	ADPRHL2_+_36554555.23-P1P2	ADPRHL2_-_36554523.23-P1P2	GTCGGAAGCGCGAGAGGGAG	TCGCCGCTGCGGCCATCCGC
ADPRM	P1P2	ADPRM_-_10600988.23-P1P2	ADPRM_+_10600958.23-P1P2	GCCAGGGGCCGGCGCACGGT	TTCAGCCCAGGGGCCGGCGC
ADRA1A	P1P2	ADRA1A_-_26724797.23-P1P2	ADRA1A_+_26724406.23-P1P2	GGCTCTCGCTGACGTAACTC	TCACCCACTCGGCCCTGCGC
ADRA1B	P1P2	ADRA1B_+_159343520.23-P1P2	ADRA1B_-_159343504.23-P1P2	GGCCCAGCGAGCGCCGAAGA	CTTCTGGGCTGACTGCACGC
ADRA1D	P1P2	ADRA1D_-_4229926.23-P1P2	ADRA1D_-_4229650.23-P1P2	GGTGCAGGCAGCGGCCACTG	CTCGTTCTGTGCCCCGGCCC
ADRA2A	P1P2	ADRA2A_+_112836769.23-P1P2	ADRA2A_+_112836955.23-P1P2	GTGCTCCGCTGCGCTCACGG	CTGCCTCCGTCGCGGCTCCC
ADRA2B	P1P2	ADRA2B_-_96782246.23-P1P2	ADRA2B_-_96782243.23-P1P2	GCTGGGCCGGTTCTTAAAGG	TTAAGAACCGGCCCAGCCCC
ADRA2C	P1P2	ADRA2C_-_3767700.23-P1P2	ADRA2C_-_3767703.23-P1P2	GGCAGCTCCGGCGAGCGAGG	CCGCCTCGCTCGCCGGAGCC
ADRB1	P1P2	ADRB1_+_115803641.23-P1P2	ADRB1_-_115803895.23-P1P2	GCCGCTGCTGGAAGAGCCGC	ATGCCGAGCTGCGGAGGCCC
ADRB2	P1P2	ADRB2_-_148206186.23-P1P2	ADRB2_+_148206227.23-P1P2	GGGCAGAACGCACTGCGAAG	CTAGCACCCGACAAGCTGAC
ADRB3	P1P2	ADRB3_+_37824097.23-P1P2	ADRB3_-_37823993.23-P1P2	GCTGGGACAGCTAGAGAAGA	GGGGATGGCTCCGTGGCCTC
ADRBK1	P1P2	ADRBK1_-_67033953.23-P1P2	ADRBK1_+_67033933.23-P1P2	GGCCCCGACTGCAGTCCCGG	CGACTGCAGTCCCGGCGGGC
ADRBK2	P1P2	ADRBK2_+_25960616.23-P1P2	ADRBK2_-_25960625.23-P1P2	GTACGGTCGCCCTCCCCTCG	CTCGGGGTGGCCACGAGGGC
ADRM1	P1P2	ADRM1_+_60878013.23-P1P2	ADRM1_-_60878073.23-P1P2	GCCCGCCGGAAACCCGCGTT	TCCGGGCTCGCTCTTCCTCC
ADSL	P1P2	ADSL_-_40742737.23-P1P2	ADSL_-_40742584.23-P1P2	GTAACGGATCCCGGGCTGAG	TGATCGCCTCCAGCCGCCAC
ADSS	P1P2	ADSS_-_244615160.23-P1P2	ADSS_-_244615191.23-P1P2	GAGCCCGAAGGAGAGGCGGC	CAGAGCAGTTCAGTTCGCTC
ADSSL1	P1P2	ADSSL1_-_105190615.23-P1P2	ADSSL1_-_105190666.23-P1P2	GGAGCCAAGCCAGCATGTCG	CCGCTTGACGCCGCCTGCGC
ADTRP	P1P2	ADTRP_-_11779009.23-P1P2	ADTRP_-_11778993.23-P1P2	GTCATGGCGAGTGCTGACCG	TGACGAAGACTTCTACATGC
AEBP1	P1P2	AEBP1_+_44143999.23-P1P2	AEBP1_+_44144026.23-P1P2	GCGAGGTCCTGGCGGCTAAT	CGACCACCCCTGAGCCCCTC
AEBP2	P1P2	AEBP2_+_19592704.23-P1P2	AEBP2_+_19592658.23-P1P2	GGCCCCGCGCCGCCGAACCC	ACCTGGAGGAGCTCTCCCGC
AEN	P1P2	AEN_-_89164606.23-P1P2	AEN_-_89164638.23-P1P2	GAGACCGGAAGAGACACGCG	CGGTGCAGGGTCCTGGATCC
AES	P1P2	AES_-_3062479.23-P1P2	AES_-_3062476.23-P1P2	GCACCGCTATTGTCTAATGG	TTAGACAATAGCGGTGGGGC
AFAP1	P1P2	AFAP1_+_7941515.23-P1P2	AFAP1_-_7941481.23-P1P2	GGATCTCGAGCGGGGTACAC	TTGTTAAGGCGGCTGCGGCC
AFAP1L1	P1P2	AFAP1L1_+_148651466.23-P1P2	AFAP1L1_-_148651676.23-P1P2	GGCTCCGGCGCGGCTGGTAG	CTCCGAGCGTTCCTCAGCCC
AFAP1L2	P1P2	AFAP1L2_+_116164197.23-P1P2	AFAP1L2_-_116164240.23-P1P2	GCCCCGATGGAGCGGTACAA	CGAGGAGCGCACTCCGTGGC
AFF1	P1P2	AFF1_+_87856192.23-P1P2	AFF1_-_87856182.23-P1P2	GGCGGCGGCCGAGTGCGCAG	GTCGCTCGCTAGCTGGCTGC
AFF2	P1P2	AFF2_+_147582328.23-P1P2	AFF2_+_147582325.23-P1P2	GACCCAGCGACCCGACGCTG	CCGCAGCGTCGGGTCGCTGC
AFF3	P1P2	AFF3_+_100758974.23-P1P2	AFF3_-_100758793.23-P1P2	GGACGTTCAACGACTTACTG	AGATGGTCCAGGCCCTGGTC
AFF4	P1P2	AFF4_-_132299252.23-P1P2	AFF4_+_132299267.23-P1P2	GGGGCGGGTTAACGAAGACC	CGTCCGCTGGCGGCGGCGAC
AFM	P1P2	AFM_+_74347558.23-P1P2	AFM_+_74347685.23-P1P2	GCTATATCCCGAGGTTGTGT	CTCACTAATTTACATAGGCC
AFMID	P1P2	AFMID_+_76183477.23-P1P2	AFMID_+_76183490.23-P1P2	GCTTCCAAGGAACCTTGCTT	TGGAAGAAGATGTCTGCAGC
AFP	P1	AFP_-_74301991.23-P1	AFP_-_74301988.23-P1	GCTAGCAACCATGAAGTGGG	ACTTCATGGTTGCTAGTTAC
AFP	P2	AFP_+_74316357.23-P2	AFP_+_74316369.23-P2	GTCCGACGAGGTCAGCTGGG	CGTCGGAGCTGATGGCCATC
AFTPH	P1P2	AFTPH_-_64751594.23-P1P2	AFTPH_-_64751572.23-P1P2	GCAGCGGTGAAACTCCGGGT	CGGGACCCCCATCCCACTAC
AGA	P1P2	AGA_+_178363535.23-P1P2	AGA_-_178363567.23-P1P2	GCTCGCGCTGGTCTCTTCGG	GGACTTTTCTCGCGCTGGTC
AGAP1	P1P2	AGAP1_+_236403013.23-P1P2	AGAP1_-_236402788.23-P1P2	GCCCCGAAGGAGGCTTGCTC	ACCTGGGACCGAGTCGCAGC
AGAP10	ENST00000413193.2	AGAP10_+_47239240.23-ENST00000413193.2	AGAP10_+_47239673.23-ENST00000413193.2	GATGGAGACTTACAGCATTG	ATGTCTTCACCTCTATCAAC
AGAP11	P1P2	AGAP11_-_88730150.23-P1P2	AGAP11_+_88730713.23-P1P2	GATGCCCCAAGCAGGTCCCC	CTTATTCCCTGCCCCAGGAC
AGAP2	P1P2	AGAP2_+_58135895.23-P1P2	AGAP2_+_58135858.23-P1P2	GTGTAGGGCCATGGGCCTCA	AGACCTGTCTTGCCAGGCTC
AGAP3	P1P2	AGAP3_-_150783602.23-P1P2	AGAP3_+_150783556.23-P1P2	GCTCCGAGGCAGCGGGATCA	TTGTTGTTGCCGCTGGAGGC
AGAP9	ENST00000453919.1	AGAP9_-_48190108.23-ENST00000453919.1	AGAP9_-_48189675.23-ENST00000453919.1	GATGGAGACTTACAGCATTG	ATGTCTTCACCTCTATCAAC
AGBL1	ENST00000421325.2	AGBL1_+_86686989.23-ENST00000421325.2	AGBL1_+_86687018.23-ENST00000421325.2	GGTCCTCGCTGTGTCTACCA	GACTATGACATCCTCCTGCC
AGBL1	ENST00000441037.2	AGBL1_+_86685262.23-ENST00000441037.2	AGBL1_+_86685489.23-ENST00000441037.2	GTCTCCGAGGACCTTGAGGA	CAGTCTTCTCACCCGACACC
AGBL2	P1P2	AGBL2_+_47736890.23-P1P2	AGBL2_+_47736896.23-P1P2	GGGGCCCTCACAGAAGGCGG	TCTGTGAGGGCCCGGGTAGC
AGBL3	P1P2	AGBL3_-_134671328.23-P1P2	AGBL3_-_134671452.23-P1P2	GGCAGTGGCGTTACTTCTAG	CACCGTCCTGTCGGGGCCGC
AGBL4	P1P2	AGBL4_-_50489570.23-P1P2	AGBL4_-_50489541.23-P1P2	GGAGCTACCTCAGGAAGACG	ACTGATCCCACCACCCGCTC
AGBL5	P1	AGBL5_+_27274578.23-P1	AGBL5_+_27274552.23-P1	GGCACCCGGGCCCTCCACCC	CGGCGCTCGGGTGTTTTTGC
AGBL5	P2	AGBL5_+_27274578.23-P1	AGBL5_+_27276183.23-P2	GGCACCCGGGCCCTCCACCC	AGTTTGGCTGGCTCCGGCTC
AGER	P1P2	AGER_+_32151968.23-P1P2	AGER_+_32151976.23-P1P2	GGGAACAGCAGTTGGAGCCT	ACTGCTGTTCCGGCAGCCAC
AGFG1	P1P2	AGFG1_-_228336893.23-P1P2	AGFG1_-_228336896.23-P1P2	GCCCTCAGGAGAAGTCGGGA	CCTTCCCGACTTCTCCTGAC
AGFG2	P1P2	AGFG2_-_100136951.23-P1P2	AGFG2_-_100136848.23-P1P2	GAGGGGTGATTGCTGACTAG	CAGGAGACTTCGCCGTCCAC
AGGF1	P1P2	AGGF1_+_76326273.23-P1P2	AGGF1_+_76326308.23-P1P2	GTAAGCAGTCGGAAAACCAG	CTGTCTCTGTAGCTGGAGAC
AGK	P1P2	AGK_-_141251280.23-P1P2	AGK_-_141251259.23-P1P2	GGAGCGCAGTGCGGGTCGCT	CGCCTGGGCGCCGCTGCACC
AGL	P1P2	AGL_-_100315679.23-P1P2	AGL_-_100315704.23-P1P2	GTACGGTCCGCTCCCACCTG	AACCTGGCCGTGCGCGCACC
AGMAT	P1P2	AGMAT_-_15911533.23-P1P2	AGMAT_+_15911485.23-P1P2	GCGATCTGGCTGGTCCCGAA	ACCAAACCGCCCGCGAGGCC
AGMO	P1P2	AGMO_+_15601600.23-P1P2	AGMO_-_15601543.23-P1P2	GCTGTTGAGTGTGCTCTCAG	CTTTGTTCAGCCTCAGGCTC
AGO1	P1P2	AGO1_-_36349067.23-P1P2	AGO1_-_36348838.23-P1P2	GGGTAAGGGTCCCCAGGAGG	ACTGCGAGCGCCCGGCCAGC
AGO2	P1P2	AGO2_-_141645534.23-P1P2	AGO2_+_141645724.23-P1P2	GCGCCGGGCCCGCCAACCAC	AACAGGTTTACCCGACGCGC
AGO3	P1P2	AGO3_+_36396775.23-P1P2	AGO3_-_36396745.23-P1P2	GGACAGAGGGGAGTCCCGTC	ACCGCTCCTCCACGACTGCC
AGO4	P1P2	AGO4_+_36273634.23-P1P2	AGO4_+_36273598.23-P1P2	GGTCCACAGAGCCCGGCAGG	TCCGGGCGCGCGCTCGTTCC
AGPAT1	P1	AGPAT1_+_32143853.23-P1	AGPAT1_+_32143856.23-P1	GGGTGGCGGGGGAATAGCGG	CTATTCCCCCGCCACCCCTC
AGPAT2	P1P2	AGPAT2_+_139581621.23-P1P2	AGPAT2_-_139581678.23-P1P2	GCGGTGGAGAACATGAGGCA	CGCTCGTCTGCCTGCTGCGC
AGPAT3	P1P2	AGPAT3_+_45285114.23-P1P2	AGPAT3_+_45285099.23-P1P2	GCCGGCCCGGCCCTGCGTCG	CACTCGCTGAGGCCCCGACC
AGPAT4	P1P2	AGPAT4_+_161694832.23-P1P2	AGPAT4_-_161695108.23-P1P2	GAAGGGGTAGGCTCCGGGGG	TGGGTGGAGTCTCGCTTTTC
AGPAT5	P1P2	AGPAT5_+_6566209.23-P1P2	AGPAT5_+_6566173.23-P1P2	GGTAGCGCATGGAGTACGTG	CCGAGCTGAGAAGATGCTGC
AGPAT6	P1P2	AGPAT6_+_41435781.23-P1P2	AGPAT6_+_41435763.23-P1P2	GACTCACCGACCGCGAGGCT	CGGGATTTGGAGCTGCCTAC
AGPAT9	P1P2	AGPAT9_+_84457483.23-P1P2	AGPAT9_+_84457464.23-P1P2	GGGTAGCGCGAGCCAGTGGT	CCGCTTACCCGCAGCTCCGC
AGPS	P1P2	AGPS_-_178257526.23-P1P2	AGPS_-_178257523.23-P1P2	GAAGGCGGTAGCCATGGCGG	CCATGGCTACCGCCTTGTGC
AGR2	P1P2	AGR2_+_16844571.23-P1P2	AGR2_+_16844579.23-P1P2	GCGACTCACACAAGGCAGGT	TGTGTGAGTCGGCGGCTAGC
AGR3	P1P2	AGR3_+_16921530.23-P1P2	AGR3_-_16921591.23-P1P2	GTTCCAGATTACTTAATCAG	ACAAGAGCACTGGCCAAGTC
AGRN	P1P2	AGRN_+_955534.23-P1P2	AGRN_+_955472.23-P1P2	GCCATGGCGCAGGCGAGAGG	CCGGAGCTGCGTCCCGTCCC
AGRP	P1P2	AGRP_+_67517230.23-P1P2	AGRP_+_67517365.23-P1P2	GCCACGCGAGGAGCCCAGAT	AGATAGAGACCCCACAGAGC
AGT	P1P2	AGT_+_230849819.23-P1P2	AGT_-_230849666.23-P1P2	GACAGCAGAAGGTAAGCCGG	ACCTGGGGTCTTACAGGAGC
AGTPBP1	P1P2	AGTPBP1_-_88356691.23-P1P2	AGTPBP1_-_88356703.23-P1P2	GACTGCAGCAGGGCGCTCAC	CATCCTGAGCCGGTGAGCGC
AGTR1	P1P2	AGTR1_-_148415748.23-P1P2	AGTR1_-_148415793.23-P1P2	GAGTGACAGGACGTCTGGAC	CATCGATCACCGCCGCGGCC
AGTR2	P1P2	AGTR2_-_115301994.23-P1P2	AGTR2_-_115302232.23-P1P2	GAAGAAGGAAACCAGAGATC	AAACACACTCCTGTAAGAGC
AGTRAP	P1P2	AGTRAP_+_11796247.23-P1P2	AGTRAP_+_11796254.23-P1P2	GCCATCCCGACTCAGGCCGA	GAGTCGGGATGGAGCTGCCC
AGXT	P1P2	AGXT_+_241808192.23-P1P2	AGXT_-_241808273.23-P1P2	GCCCAGCAGGGCGGACACAG	AACCTGCCGCTCGGGAACCC
AGXT2	P1P2	AGXT2_-_35047966.23-P1P2	AGXT2_-_35047958.23-P1P2	GCGGAAGTGACCAGGCACAA	GGTCACTTCCGCTCCCAGGC
AHCTF1	P1P2	AHCTF1_+_247095176.23-P1P2	AHCTF1_-_247095134.23-P1P2	GGAGCAGGCAGCGTTGCAAG	CTGAGCGGTCTGCAGGCCTC
AHCY	P1P2	AHCY_-_32891145.23-P1P2	AHCY_-_32890950.23-P1P2	GCTGGGAACAGGAACTGGGC	CTGGAATCGCAGCCTCGGCC
AHCYL1	P1	AHCYL1_-_110527422.23-P1	AHCYL1_+_110527472.23-P1	GTTGCGTACAGCGGAGGTGG	TCGCTGTCCGGCTGCCTTGC
AHCYL2	P1P2	AHCYL2_+_128864979.23-P1P2	AHCYL2_-_128864878.23-P1P2	GCTCCGCCTCGGAGGGGCTC	GCTCTTGGTCGGCCCCGCCC
AHDC1	P1P2	AHDC1_+_27930650.23-P1P2	AHDC1_+_27930664.23-P1P2	GAGGTAAGGCGAGCTCGCAG	TACCTTCGCCGCTCACCATC
AHI1	P1P2	AHI1_-_135818658.23-P1P2	AHI1_-_135818819.23-P1P2	GCGACACGCCGCCCAGGAGA	CCTCACTTCGCGCACGCGCC
AHNAK	P1	AHNAK_-_62314257.23-P1	AHNAK_-_62314203.23-P1	GGCGGGCGGTGCAGTCCCCG	CCAGTAGCCGCAGCACCGCC
AHNAK	P2	AHNAK_+_62313083.23-P2	AHNAK_+_62313086.23-P2	GCGGTGCGCGCCAGGAGAGG	CTCCTGGCGCGCACCGCTGC
AHNAK2	P1	AHNAK2_-_105436753.23-P1	AHNAK2_-_105436781.23-P1	GACAGACCCGCGGAAGAGTG	GTGTCCATGTCCGGACACCC
AHNAK2	P2	AHNAK2_+_105444688.23-P2	AHNAK2_-_105444648.23-P2	GGTCCGAGGTCGGCCGCCCG	CCCCGTGCGCCGGAGCCGGC
AHR	P1P2	AHR_-_17338343.23-P1P2	AHR_+_17338317.23-P1P2	GGACCGCCAGCTCAGAACAG	CGGACCGCCAGCTCAGAACC
AHRR	P1P2	AHRR_+_321892.23-P1P2	AHRR_+_322709.23-P1P2	GAGGCTCAGGCACACCCGCG	CCACGGGGCCTCACAGCCGC
AHSA1	P1P2	AHSA1_-_77924524.23-P1P2	AHSA1_-_77924606.23-P1P2	GGAGCTGGTGGCGCCGCGAT	GTTGTTGACGTTGGTGGCGC
AHSA2	P1P2	AHSA2_+_61404654.23-P1P2	AHSA2_+_61404634.23-P1P2	GCATGGCGGCGTGGACTGGG	CGGCCTTTCCTTGTTTTCCC
AHSG	P1P2	AHSG_+_186330893.23-P1P2	AHSG_+_186330836.23-P1P2	GGCCCTGGCAGGCGTGCAGG	TCCATGGGTCTACCTTTCCC
AHSP	P1P2	AHSP_-_31539252.23-P1P2	AHSP_+_31539439.23-P1P2	GCACGCACCCTCAAGAGTGT	TTTTCTCTACCCAGGCAGAC
AICDA	P1P2	AICDA_+_8765390.23-P1P2	AICDA_+_8765359.23-P1P2	GTTCTGGCCTGAGACTTGCA	TAGTGGTGTCCAGAGTGTCC
AIDA	P1P2	AIDA_+_222885817.23-P1P2	AIDA_+_222886084.23-P1P2	GGAGCCGCAAAGTTTGGCTG	CTGAGCTGCGCGCACTACCC
AIF1	P1P2	AIF1_+_31583079.23-P1P2	AIF1_-_31583032.23-P1P2	GAGCAGATGCTGGTAGAGGT	ACCAGTCTTCTCAGAAGCCC
AIF1L	P1P2	AIF1L_+_133971957.23-P1P2	AIF1L_+_133971935.23-P1P2	GGACGCGGCGAGGGACGAGG	GGACCAGGCGCCTGTGCCTC
AIFM1	P1P2	AIFM1_-_129299770.23-P1P2	AIFM1_+_129299661.23-P1P2	GCCTCCTCCCAGCTCCGGGT	TTTCCTCTCACGCACGACCC
AIFM2	P1P2	AIFM2_+_71892557.23-P1P2	AIFM2_+_71892542.23-P1P2	GCGCCTCGGGTCAGTAACTC	CTTGGTCGTCTTCCCGAGTC
AIFM3	P1	AIFM3_-_21321575.23-P1	AIFM3_-_21321616.23-P1	GGGCCTGGAACACGGAGCAG	TGGCTAGCACTCCGGACACC
AIFM3	P2	AIFM3_+_21319479.23-P2	AIFM3_+_21319522.23-P2	GGCTCACCTGGGCTCGGCGC	CGGAACCCCGGTCCCCGCCC
AIG1	P1P2	AIG1_+_143382079.23-P1P2	AIG1_+_143382050.23-P1P2	GGATTGCCATCCGCAGCACC	CTGGCGAACATGGCGCTTGC
AIM1	P1P2	AIM1_-_106960473.23-P1P2	AIM1_-_106960486.23-P1P2	GGCCCAGCCCCGGTACCAAA	CTCGGAGCTGCCCTTTGGTC
AIM1L	P1	AIM1L_+_26680595.23-P1	AIM1L_+_26680576.23-P1	GGAGAGCCCAATCGCATCAG	GCTGCTGGGCCGTGCTCCCC
AIM1L	P2	AIM1L_+_26662903.23-P2	AIM1L_+_26662898.23-P2	GCCTAGAGAAGACAAGGCTA	GCCCCTAGCCTTGTCTTCTC
AIM2	P1P2	AIM2_-_159046491.23-P1P2	AIM2_+_159046458.23-P1P2	GCAGAGAGCTTAACTAGCAG	CCTTCTTTTCAGAGAGCTTC
AIMP1	P1P2	AIMP1_+_107237731.23-P1P2	AIMP1_+_107237742.23-P1P2	GACATGAAGCGGAGGACCAC	CTTCATGTGAGTGACGTCGC
AIMP2	P1P2	AIMP2_+_6048922.23-P1P2	AIMP2_-_6048940.23-P1P2	GAAACCGTCAGAGGTCACGA	TCAGAGGTCACGACGGAGAC
AIP	P1P2	AIP_+_67250544.23-P1P2	AIP_-_67250576.23-P1P2	GTCGGCAACTCCTAGCACCT	GACTTGCTTCGGCAACTCCC
AIPL1	P1P2	AIPL1_-_6338440.23-P1P2	AIPL1_-_6338416.23-P1P2	GTCCATGGCTGCAGGAGAAA	CTCTGCTCCTGAACGTGGAC
AIRE	P1P2	AIRE_-_45705829.23-P1P2	AIRE_+_45705833.23-P1P2	GGGACCCGAGGCCAAGCGAG	GTGTCCCGGGACCCACCGCC
AJAP1	P1P2	AJAP1_-_4714684.23-P1P2	AJAP1_-_4714913.23-P1P2	GGAGGCAGACGCGAGGAGGG	CTCAAGTTGCCCGGGGGCTC
AJUBA	P1P2	AJUBA_+_23451722.23-P1P2	AJUBA_-_23451680.23-P1P2	GGCGTGAACAGATAGACCTG	CAGATGCGCGGGGGGACGCC
AK1	P1P2	AK1_-_130639906.23-P1P2	AK1_+_130639940.23-P1P2	GGCGGGCACGCACTGACCTG	TGCCCGTCCTCGCGGCGGCC
AK2	P1P2	AK2_+_33502475.23-P1P2	AK2_+_33502194.23-P1P2	GGCGTTGACCTGGGAAGCAC	GAACCGAGACCCCGGCCAGC
AK3	P1P2	AK3_-_4741156.23-P1P2	AK3_-_4741205.23-P1P2	GGCCTGCGCGCTCACCCGCT	CAGTAGCCGCCTGCTAGTGC
AK4	P1P2	AK4_-_65613902.23-P1P2	AK4_+_65613321.23-P1P2	GGCTCAGTCCGCCTGCTACT	CTCGGAGTGCTGCCTCCAGC
AK5	P1P2	AK5_-_77747738.23-P1P2	AK5_-_77747887.23-P1P2	GCTGGCAGCCCGGGAAGCCG	TCTTTCTCACGCGCACTCAC
AK7	P1P2	AK7_+_96858485.23-P1P2	AK7_-_96858538.23-P1P2	GCCTCTTCTTCAGCCATGGT	GATAACCTTCTCCGTGAGAC
AK8	P1P2	AK8_+_135753659.23-P1P2	AK8_-_135753634.23-P1P2	GCGACGCGGTTACTAGGGAG	CTATCGCCCCGCACCGTATC
AK9	P1P2	AK9_+_110012406.23-P1P2	AK9_-_110012454.23-P1P2	GGACGTATCATAGAGAGGTC	CTCACGTCGGGAGCGGGGCC
AKAP1	P1P2	AKAP1_-_55162653.23-P1P2	AKAP1_-_55162661.23-P1P2	GCGCCTGGGCTAGCACGTGG	CAGCTCCCCCACGTGCTAGC
AKAP10	P1P2	AKAP10_+_19881070.23-P1P2	AKAP10_+_19881078.23-P1P2	GGCATCCCGAGGAGGCGGTG	CCTCGGGATGCCCAGGCAGC
AKAP11	P1P2	AKAP11_+_42846479.23-P1P2	AKAP11_+_42846376.23-P1P2	GAAGCCAGAAGGGGGACCAG	ACGTGCTCGCCGCGGAGGCC
AKAP12	P1	AKAP12_-_151561599.23-P1	AKAP12_-_151561609.23-P1	GGGCGAAGGAAGGCGCTCTC	GCGAGGTCCCGAGAGCGCCC
AKAP12	P2	AKAP12_+_151646850.23-P2	AKAP12_-_151646835.23-P2	GCAGACACTCCCGGAGGATG	TCGGAGCTGCCGCAGCGAAC
AKAP13	P1P2	AKAP13_+_85923863.23-P1P2	AKAP13_+_85923876.23-P1P2	GGAGCACAGGCGCTTCACCG	GTGCTCTGCCGAGACTGCCC
AKAP14	P1P2	AKAP14_+_119030185.23-P1P2	AKAP14_+_119030176.23-P1P2	GTTGGAACAGGAGCAGTGGT	CAGCCACCTACCACTGCTCC
AKAP17A	P1P2	AKAP17A_-_1710549.23-P1P2	AKAP17A_+_1710540.23-P1P2	GGCGTCGGAGGCGCCTCCGG	CCGGGGGACGGTGGCGGCTC
AKAP2	P1P2	AKAP2_+_112811051.23-P1P2	AKAP2_+_112811196.23-P1P2	GCCGCTGCCTCCCGCTCCGG	AGGAAGGGGTTGCCGAGGAC
AKAP3	P1	AKAP3_-_4758224.23-P1	AKAP3_-_4758021.23-P1	GTTGCGCAGACAGGCGAGAA	GTGACTGACTCAGGACATGC
AKAP3	P2	AKAP3_-_4754248.23-P2	AKAP3_-_4754290.23-P2	GGTACTGGAATAGTGAACCA	AGCATCTTCATTGACTTTAC
AKAP4	P1P2	AKAP4_+_49964995.23-P1P2	AKAP4_+_49964966.23-P1P2	GGTCCAACAGCTGACAGGGG	AGTTCTTGGGCACCTGCAGC
AKAP5	P1P2	AKAP5_+_64932289.23-P1P2	AKAP5_-_64932236.23-P1P2	GGCCAACACTGCTCCCGAGG	GAGCAAGGCGCCCTCTGCAC
AKAP6	P1P2	AKAP6_-_32798545.23-P1P2	AKAP6_+_32798551.23-P1P2	GTCATGCAGCAGGTCAAACA	AGTATTGCATCCTACAGATC
AKAP7	P1P2	AKAP7_+_131456600.23-P1P2	AKAP7_-_131456599.23-P1P2	GCGCCGGAACAAGCCAGAAG	ACCCGAGTCGCCGGTGGTAC
AKAP8	P1P2	AKAP8_+_15490555.23-P1P2	AKAP8_+_15490566.23-P1P2	GAGTAAACGGGGCTGCTGGT	CGTTTACTAGGCGACCACAC
AKAP8L	P1P2	AKAP8L_-_15529738.23-P1P2	AKAP8L_+_15529720.23-P1P2	GCCACCTGTGTAGCTCATGG	GTGTAGCTCATGGTGGCGGC
AKAP9	P1P2	AKAP9_+_91570225.23-P1P2	AKAP9_+_91570248.23-P1P2	GGGATCGTCCTCAGCCGCAC	GTGAGCGCGGAGACTGCTTC
AKIP1	P1P2	AKIP1_-_8932793.23-P1P2	AKIP1_-_8932799.23-P1P2	GGAGGGGGCTCCCTAAGTAG	CTTCCGCTACTTAGGGAGCC
AKIRIN1	P1P2	AKIRIN1_+_39456935.23-P1P2	AKIRIN1_-_39457004.23-P1P2	GCGCCTCCAGCACCCGGCAG	AAGAGGCTCCTCAGCCGGGC
AKIRIN2	P1P2	AKIRIN2_+_88411936.23-P1P2	AKIRIN2_+_88411931.23-P1P2	GGGGTGGGAGAGTTCTACGA	CTCCCTCGTAGAACTCTCCC
AKNA	P1	AKNA_+_117150220.23-P1	AKNA_+_117150244.23-P1	GCAGGGCGCAATGGAGACAG	CCTCCAGGCCGTTCTGCCAC
AKNA	P2	AKNA_+_117160706.23-P2	AKNA_+_117160729.23-P2	GCGCCAGCAGGTGAGACTCG	CCGAGCGCGGGTGGTTTCCC
AKNAD1	ENST00000370001.3	AKNAD1_+_109399657.23-ENST00000370001.3	AKNAD1_+_109399646.23-ENST00000370001.3	GGGTTCTGTTGGATTCTGAG	AAGAGGTTCCACTCAGAATC
AKR1A1	P1P2	AKR1A1_+_46016701.23-P1P2	AKR1A1_-_46016592.23-P1P2	GAAGTTCCACCCGGAGGGAG	CTGGATCCTCGAGGTCGAAC
AKR1B1	P1P2	AKR1B1_+_134143839.23-P1P2	AKR1B1_-_134143848.23-P1P2	GGCCAAGGCCGCACCGTACT	TACTGGGCGGGGGTCTGGGC
AKR1B10	P1P2	AKR1B10_+_134212317.23-P1P2	AKR1B10_+_134212298.23-P1P2	GGGCCACAGGCTGCTTAAGA	CTGTAGATAGCAGCAGCCTC
AKR1B15	P1P2	AKR1B15_+_134234041.23-P1P2	AKR1B15_-_134233853.23-P1P2	GTGAGGGAGGACCTTCGTCA	GGAATGAGTCAGGTCTTCAC
AKR1C1	P1P2	AKR1C1_+_5005615.23-P1P2	AKR1C1_+_5005619.23-P1P2	GTTTCTGTCACTAGCCTGGC	GGCTAGTGACAGAAATGGAC
AKR1C2	P1	AKR1C2_-_5046012.23-P1	AKR1C2_+_5046039.23-P1	GATCATTCAGCTTCACACAC	GGTTAGCAAATGTTTCTTCC
AKR1C2	P2	AKR1C2_-_5060075.23-P2	AKR1C2_+_5059865.23-P2	GACAGAAGGCATGGCACGGG	ATCACACCTACTACCTATCC
AKR1C3	P1P2	AKR1C3_-_5136634.23-P1P2	AKR1C3_-_5136639.23-P1P2	GGCTAGTCAGACAAGTGACA	TTCCCTGTCACTTGTCTGAC
AKR1C4	P1P2	AKR1C4_+_5239007.23-P1P2	AKR1C4_-_5239039.23-P1P2	GAGACCACGTGAGTCACTCA	AGTAAGACAGACCACGTGAC
AKR1D1	P1P2	AKR1D1_+_137761243.23-P1P2	AKR1D1_+_137761259.23-P1P2	GTTGTGGAGAACCTGACTGT	CAATGGATCTCAGTGCTGCC
AKR1E2	P1P2	AKR1E2_+_4868442.23-P1P2	AKR1E2_+_4868462.23-P1P2	GGGCACCGCGCGAGCTACTG	GTCGGTAGTCGCGTGCGGGC
AKR7A2	P1P2	AKR7A2_-_19638512.23-P1P2	AKR7A2_-_19638583.23-P1P2	GCCAGCACCGAGGCGACCCG	CCGTCCACTGCGCGCTTCGC
AKR7A3	P1P2	AKR7A3_+_19615549.23-P1P2	AKR7A3_-_19614864.23-P1P2	GCGAGGAAGGAGGGACGACG	CTGTTCACCTCGCAGCCTTC
AKT1	P1P2	AKT1_+_105261633.23-P1P2	AKT1_+_105262020.23-P1P2	GGCGCGGGCCCGGCCAAGGG	GTCTTCGGGCCGCGCTGCGC
AKT1S1	P1P2	AKT1S1_+_50379848.23-P1P2	AKT1S1_+_50379851.23-P1P2	GGCTACGGGCACGTGAGTGG	CTCACGTGCCCGTAGCCAGC
AKT2	P1P2	AKT2_+_40791298.23-P1P2	AKT2_-_40791096.23-P1P2	GGTATTTCCGTCCAGAGGGT	GTGACAGGTGAGTGCGCCAC
AKT3	P1P2	AKT3_-_244013539.23-P1P2	AKT3_-_244013349.23-P1P2	GCCGGCGGGAGGGCAAGCGA	TTGCAGGTAACAGCCACCGC
AKTIP	P1P2	AKTIP_+_53537096.23-P1P2	AKTIP_+_53536913.23-P1P2	GAGATGCTGTCGGGCCGCGG	CCGTGTCCCACTGCGGCCGC
ALAD	P1P2	ALAD_+_116163528.23-P1P2	ALAD_-_116163546.23-P1P2	GAGACCGGAGCGGGAGACAG	GAGCGGGAGACAGCGGTGAC
ALAS1	P1P2	ALAS1_+_52232365.23-P1P2	ALAS1_-_52232194.23-P1P2	GCGGGTGACTGGGACAGTGG	TTGTCCGGGAGCAGCCTCAC
ALAS2	P1P2	ALAS2_-_55057349.23-P1P2	ALAS2_+_55057338.23-P1P2	GAGCTGGCAGACCAGAGATA	GAGATAGGGTGCCAGGCTGC
ALB	P1	ALB_-_74270053.23-P1	ALB_+_74270025.23-P1	GGCCTTTGGCACAATGAAGT	ACACGCCTTTGGCACAATGC
ALB	P2	ALB_+_74275112.23-P2	ALB_+_74275099.23-P2	GGCAAAGAAAAGGAGTTCCG	TACTTTTATGCCCCGGAACC
ALCAM	P1P2	ALCAM_+_105085800.23-P1P2	ALCAM_+_105085743.23-P1P2	GGGCGGCGGGTCTCCTCAGG	CTACTCAGAGCAGCCCGGAC
ALDH16A1	P1P2	ALDH16A1_+_49956535.23-P1P2	ALDH16A1_-_49956532.23-P1P2	GCGGGGCGCTCTGTGTTAAG	TGAGGTCCGAAGAGCGACAC
ALDH18A1	P1P2	ALDH18A1_+_97416448.23-P1P2	ALDH18A1_+_97416086.23-P1P2	GTCATCGTGCGGGACGTGGA	TCCGTAGATCCCGGGGCGGC
ALDH1A1	P1P2	ALDH1A1_-_75567941.23-P1P2	ALDH1A1_-_75567897.23-P1P2	GGATTCGGCTCCTGGAACAC	GACTTACCTGTCCTACTCAC
ALDH1A2	P1P2	ALDH1A2_-_58357877.23-P1P2	ALDH1A2_+_58357872.23-P1P2	GGCCGGGTGTCCCTAGCCCG	CGGCGTGGGGCAGTGCGGGC
ALDH1A3	P1	ALDH1A3_-_101419689.23-P1	ALDH1A3_-_101419642.23-P1	GCCCGACTTCGGGGAGGCAG	ACTCCCAGCCGCCGCACGGC
ALDH1B1	P1P2	ALDH1B1_+_38392957.23-P1P2	ALDH1B1_+_38392764.23-P1P2	GTAGCGTCACCCAGAGGCGG	AAGCGTGATCCTGAACCGGC
ALDH1L1	P1P2	ALDH1L1_-_125899391.23-P1P2	ALDH1L1_-_125899333.23-P1P2	GGCAGCCCCGAAACTGAGGT	ACTCCTGCGCGCGGTGAGTC
ALDH1L2	P1P2	ALDH1L2_-_105478237.23-P1P2	ALDH1L2_+_105477985.23-P1P2	GTGGAGAGGAGCGCTAGCAC	TCCTCTGAGGTCTCTCTGTC
ALDH2	P1P2	ALDH2_+_112204799.23-P1P2	ALDH2_+_112204778.23-P1P2	GAGGCGGGGCCCGAAGCGGG	CTGCGATGTTGCGCGCTGCC
ALDH3A1	P1P2	ALDH3A1_+_19651582.23-P1P2	ALDH3A1_-_19651612.23-P1P2	GGAGCCCCAGTTACCGGGAG	TTCCAGGAGCCCCAGTTACC
ALDH3A2	P1P2	ALDH3A2_-_19552119.23-P1P2	ALDH3A2_+_19552078.23-P1P2	GTCAGCGGGCGTGGAGGTCG	CCGACTGGCAGTGGGACTCC
ALDH3B1	P1P2	ALDH3B1_+_67777809.23-P1P2	ALDH3B1_+_67777830.23-P1P2	GGCTGTCCCGCTCTGCCTGG	GGAGGAAGGGCAGCTTGGCC
ALDH3B2	P1P2	ALDH3B2_+_67442058.23-P1P2	ALDH3B2_+_67442070.23-P1P2	GCAGGCGTGGGCACGGGAGT	ACGCCTGGCAATGGGGTAAC
ALDH4A1	P1P2	ALDH4A1_-_19228972.23-P1P2	ALDH4A1_-_19229032.23-P1P2	GTCACCCGGCCCCGGTCCAG	CTTCTAACCCGAGATGCTGC
ALDH5A1	P1P2	ALDH5A1_+_24495207.23-P1P2	ALDH5A1_+_24495537.23-P1P2	GGCCATGGCCCGGGCAACGA	ACGAGGCTTTCTGCCGCTGC
ALDH6A1	P1P2	ALDH6A1_+_74551093.23-P1P2	ALDH6A1_+_74551090.23-P1P2	GCTAGGGCGGCCGAGAGCCA	CCATGGCTCTCGGCCGCCCC
ALDH7A1	P1P2	ALDH7A1_+_125930884.23-P1P2	ALDH7A1_-_125930901.23-P1P2	GGAGTCCCGGGCTCAGTATG	GGGCTCAGTATGTGGCGCCC
ALDH8A1	P1P2	ALDH8A1_+_135271208.23-P1P2	ALDH8A1_-_135271197.23-P1P2	GGCTCAGTCGTAAAGAGGAA	TGCTATGGCTGGAACAAACC
ALDH9A1	P1P2	ALDH9A1_-_165667740.23-P1P2	ALDH9A1_-_165667800.23-P1P2	GTCATGGCGGCGACAGGAGA	CTCATGTTTCTCCGAGCAGC
ALDOA	P1P2	ALDOA_+_30077139.23-P1P2	ALDOA_+_30077177.23-P1P2	GGTCACCAGGACCCCTTCTG	TGAATCCACTCGCCAGCCCC
ALDOB	P1	ALDOB_-_104197973.23-P1	ALDOB_-_104198032.23-P1	GGTGCTGTCCAGGTATACAA	ACAGCTTTTGATATCTAGGC
ALDOB	P2	ALDOB_-_104187759.23-P2	ALDOB_-_104187762.23-P2	GAACAGCTGCAGGAACAGTA	CCGTACTGTTCCTGCAGCTC
ALDOC	P1P2	ALDOC_+_26903892.23-P1P2	ALDOC_-_26903885.23-P1P2	GCATTTACCAGAGGGAGCCA	CATCTGTTTGCGGATCAGAC
ALG1	P1P2	ALG1_+_5122044.23-P1P2	ALG1_+_5122098.23-P1P2	GCCACTCACTGCAGAACCCC	TTGATCCTCGGTTCTAACCC
ALG10	P1P2	ALG10_+_34175434.23-P1P2	ALG10_+_34175364.23-P1P2	GTCGAAATGGGCGCGCTAGG	GATCTTTCCGGATCCGCGCC
ALG10B	P1P2	ALG10B_+_38710525.23-P1P2	ALG10B_+_38710933.23-P1P2	GGCGCGGATCCGGAAAACAG	ATCTTTAGACTTAACTCGTC
ALG11	P1P2	ALG11_-_52586543.23-P1P2	ALG11_+_52586530.23-P1P2	GAAGCGTTTCCTGAGTTCGG	GAGTTCGGGGGTCGGCGGAC
ALG12	P1P2	ALG12_+_50312054.23-P1P2	ALG12_-_50312053.23-P1P2	GAGGGCACAGAGGGTCTCTG	TAGCGGCCGGGGCTGCGGTC
ALG13	P1P2	ALG13_+_110924898.23-P1P2	ALG13_+_110924465.23-P1P2	GCGACGTGCGGTCCACAGGG	TAGGGACCACCAGCTTTGAC
ALG14	P1P2	ALG14_+_95538352.23-P1P2	ALG14_+_95538302.23-P1P2	GTTCCATGGACGTTACGCCC	CCTCGATACTTACCGGACCC
ALG1L	ENST00000340333.3	ALG1L_-_125655482.23-ENST00000340333.3	ALG1L_-_125655452.23-ENST00000340333.3	GCAGCCCAAAAAACAAAGCA	CCTCACCTCTCTGTCTTGCC
ALG2	P1P2	ALG2_-_101984133.23-P1P2	ALG2_+_101984159.23-P1P2	GGGTGGAGGAACAGCACCGA	TGCTCCTCCGCCATGGCCCC
ALG3	P1P2	ALG3_-_183966701.23-P1P2	ALG3_+_183966721.23-P1P2	GCTGGGCCGCGGAACCGGAC	CCATCTTAACGGTGCGCCGC
ALG5	P1P2	ALG5_+_37573433.23-P1P2	ALG5_+_37573440.23-P1P2	GGCTGCCACGGCATGGAGAA	TGCCGTGGCAGCCCGCCCAC
ALG6	P1P2	ALG6_+_63833373.23-P1P2	ALG6_-_63833380.23-P1P2	GCCTGGGGTCCGGAACCTCC	CCGGGATCCCATGCTCTTAC
ALG8	P1P2	ALG8_+_77850627.23-P1P2	ALG8_-_77850641.23-P1P2	GTGCGGTGCCGCAGCAATGG	CAGCAATGGCGGCGCTCACC
ALG9	P1P2	ALG9_-_111742019.23-P1P2	ALG9_+_111742236.23-P1P2	GACAGCTAAGACCCTCCCGG	ATGAAGTCGGTGAGCGCGCC
ALK	P1P2	ALK_+_30144436.23-P1P2	ALK_-_30144395.23-P1P2	GCCAGGCAGATGCGATCCAG	CCTCTGTTCGGAGGGTCGCC
ALKBH1	P1P2	ALKBH1_+_78174341.23-P1P2	ALKBH1_-_78174295.23-P1P2	GGGGTATAGGCCGCGAGATG	GGGGAGGACGCCTTTCGGAC
ALKBH2	P1P2	ALKBH2_+_109531250.23-P1P2	ALKBH2_+_109531240.23-P1P2	GTCCCACCACGAGGCCACCA	GCAGTCACCCTGGTGGCCTC
ALKBH3	P1P2	ALKBH3_-_43902421.23-P1P2	ALKBH3_+_43902434.23-P1P2	GAGACTGCGGAGTGGGTCAG	CAAGTCCTACCGGGTTTGCC
ALKBH4	P1P2	ALKBH4_-_102105260.23-P1P2	ALKBH4_-_102105269.23-P1P2	GCATTCCCGAAGGACTTCGG	CCGAGACCCCCGAAGTCCTC
ALKBH5	P1P2	ALKBH5_-_18087161.23-P1P2	ALKBH5_-_18087156.23-P1P2	GTGAGGAGCCCGCTAAGGAG	TAGCGGGCTCCTCACCGCGC
ALKBH6	P1P2	ALKBH6_+_36505031.23-P1P2	ALKBH6_+_36505140.23-P1P2	GGTAGAGATGGATGTCAATA	CACATTACAGACGCAGAGTC
ALKBH7	P1P2	ALKBH7_+_6372803.23-P1P2	ALKBH7_+_6372823.23-P1P2	GGGAGCGGGGTCATGAGAGA	GGATTATGGCCGGGACTGGC
ALKBH8	P1P2	ALKBH8_+_107436425.23-P1P2	ALKBH8_-_107436413.23-P1P2	GTGGCCGCGCCCAGGGGAGA	CTGCGGTGTTCTGGTGCTAC
ALLC	P1P2	ALLC_-_3705821.23-P1P2	ALLC_+_3706035.23-P1P2	GGCTGGCACTCAAGCACCGT	TTGAACTGTGTTGGTACCGC
ALMS1	P1P2	ALMS1_+_73612991.23-P1P2	ALMS1_-_73612999.23-P1P2	GAGATCCTCGGGCTCCATGT	TGTTGGTGTCTCGCTCTGGC
ALOX12	P1P2	ALOX12_+_6899415.23-P1P2	ALOX12_+_6899409.23-P1P2	GTGGCGCCCCCCAGCAGCTT	TCGCCTAAGCTGCTGGGGGC
ALOX12B	P1P2	ALOX12B_+_7990948.23-P1P2	ALOX12B_-_7991020.23-P1P2	GGCACCCACCCCGGCCACCA	AGACACCTGCTCACTCACCC
ALOX15	P1P2	ALOX15_-_4544920.23-P1P2	ALOX15_+_4544912.23-P1P2	GGCATAGAGCGAGGCCCCAG	CAGTGGACACGCGGATGCGC
ALOX15B	P1P2	ALOX15B_-_7942419.23-P1P2	ALOX15B_-_7942393.23-P1P2	GAACCAGGCGTGTCCCAGGG	CTGGTTATTGCCACTGACTC
ALOX5	P1P2	ALOX5_+_45869730.23-P1P2	ALOX5_+_45869734.23-P1P2	GCCACGGTGACCGTGTAGGA	ACACGGTCACCGTGGCCACC
ALOX5AP	P1P2	ALOX5AP_+_31309673.23-P1P2	ALOX5AP_+_31309779.23-P1P2	GAACCTGCCCTGTACAGGAA	TCGTCACCCTCATCAGCGTC
ALOXE3	P1P2	ALOXE3_-_8021474.23-P1P2	ALOXE3_-_8021463.23-P1P2	GCTCTCTCTGGGATGTTCCT	AGAGAGAGCTGGGCCCATCC
ALPI	P1P2	ALPI_+_233320899.23-P1P2	ALPI_+_233320877.23-P1P2	GGGGCCCCTGCATGTCTTGG	CTTCGCCTCCCTCCTGCTGC
ALPK1	P1P2	ALPK1_-_113218819.23-P1P2	ALPK1_+_113218559.23-P1P2	GTGAGTTGGTGGGGTGAAGG	GAATTAACTCTGCTCAGAGC
ALPK2	ENST00000361673.3	ALPK2_+_56296241.23-ENST00000361673.3	ALPK2_-_56296111.23-ENST00000361673.3	GGACCTAGTTCACTGAAGGG	TTGAATCCCTGTCCCGGGAC
ALPK3	P1P2	ALPK3_-_85360424.23-P1P2	ALPK3_-_85360414.23-P1P2	GCAGACACCAGGGCCGCCAA	TGGTGTCTGCAGTAGCGCCC
ALPL	P1	ALPL_+_21835978.23-P1	ALPL_+_21835943.23-P1	GCACTGGCGAGGGTCCGTCC	CTATCCTGGCTCCGTGCTCC
ALPL	P2	ALPL_+_21877779.23-P2	ALPL_-_21877787.23-P2	GGCCATCTCAGCTGCCACAC	CACCGGGAGTTTCTAAGTGC
ALPP	P1P2	ALPP_+_233243502.23-P1P2	ALPP_+_233243599.23-P1P2	GGGGCCCCAGCATGTCTGGA	CGAGCTGCCCCTACACAACC
ALPPL2	P1P2	ALPPL2_+_233271581.23-P1P2	ALPPL2_+_233271588.23-P1P2	GTCTGGAAGCAGTCGGAGAG	ACTGCTTCCAGACATGCAGC
ALS2	P1P2	ALS2_-_202645613.23-P1P2	ALS2_+_202645584.23-P1P2	GCGCTCACCTGAAGCTCCAC	ACACTCGCTCACCTGAAGCC
ALS2CL	P1P2	ALS2CL_+_46735125.23-P1P2	ALS2CL_+_46735113.23-P1P2	GAACCACAGCGCTCAGGTAA	TTCGTCGCGCCCTTACCTGC
ALS2CR11	P1P2	ALS2CR11_+_202483870.23-P1P2	ALS2CR11_+_202483880.23-P1P2	GCCGTCGGTTGGGCGCAGAC	AACCGACGGCCCGCTACTGC
ALS2CR12	P1P2	ALS2CR12_+_202222032.23-P1P2	ALS2CR12_+_202222077.23-P1P2	GGTCACAGGAATCTGAATGG	TTGGGAGATGGCAGGCCAAC
ALX1	P1P2	ALX1_+_85674007.23-P1P2	ALX1_+_85674064.23-P1P2	GGACTGTCGCGTAGCTCCTG	TCAAGAGCCCTCCGAGTAAC
ALX3	P1P2	ALX3_-_110613186.23-P1P2	ALX3_-_110613212.23-P1P2	GGTCCCCCGAGGCCACATAG	TTCCGCGTGGGGCCTGCACC
ALX4	P1P2	ALX4_-_44331565.23-P1P2	ALX4_-_44331571.23-P1P2	GGGGCTGTAGTAGGCGTCCA	CTGCCATGGACGCCTACTAC
ALYREF	P1P2	ALYREF_-_79849458.23-P1P2	ALYREF_+_79849212.23-P1P2	GCGGGCGCGGAATCGGGCAT	GTCGGTTCCTGCCGCCTCCC
AMACR	P1P2	AMACR_+_34008110.23-P1P2	AMACR_-_34008125.23-P1P2	GGAAGCGCCATGGCACTGCA	TGGCACTGCAGGGCATCTCC
AMBN	P1P2	AMBN_+_71458058.23-P1P2	AMBN_+_71457964.23-P1P2	GGACATGCACTGTGCTCTCA	TGAATGAGAAGTACAGAGCC
AMBP	P1P2	AMBP_+_116840506.23-P1P2	AMBP_-_116840545.23-P1P2	GGAGCCTGTGGGATATACCA	TTCTGTTGCTAGACCGAGCC
AMBRA1	P1P2	AMBRA1_+_46615541.23-P1P2	AMBRA1_-_46615538.23-P1P2	GGATGTCTCCTGAGCGGCGG	GGTCGAGGGCTGAGTTGTCC
AMD1	P1P2	AMD1_-_111196001.23-P1P2	AMD1_-_111196231.23-P1P2	GCGCTCTCGCTTACACAGTA	CTGCGGATTGTTCCAGCTGC
AMDHD1	P1P2	AMDHD1_+_96337113.23-P1P2	AMDHD1_-_96337132.23-P1P2	GGGCCACCGGCAGGACTCAG	CCGGCAGGACTCAGTGGAGC
AMDHD2	P1P2	AMDHD2_+_2570434.23-P1P2	AMDHD2_-_2570366.23-P1P2	GGAGCCGTGTCGGGAGCGAG	ACGTGACCTTCAGCTGACTC
AMELX	P1P2	AMELX_-_11311536.23-P1P2	AMELX_+_11311546.23-P1P2	GATAGTTGGAAGAAATCTAA	TGAGTTTCAAACAGAAACTC
AMELY	P1P2	AMELY_+_6742063.23-P1P2	AMELY_-_6742053.23-P1P2	GATAGTTAAAGAAAATCTAG	TGTGTAGCACAAAGAAAGTC
AMER1	P1P2	AMER1_+_63425562.23-P1P2	AMER1_+_63425598.23-P1P2	GCTGGAGGTGACTGGAGCCG	CAGGCTTTGGGTAGCTCCCC
AMER2	P1P2	AMER2_-_25745692.23-P1P2	AMER2_+_25745684.23-P1P2	GTTCCTCCTGCAGACCCCCA	CCACGGACGCGCCAGCTCCC
AMER3	P1P2	AMER3_+_131513347.23-P1P2	AMER3_+_131513159.23-P1P2	GGGAGCGGGCCTGCAAGAAG	CAGTTCTGCGGAGACAGAGC
AMFR	P1P2	AMFR_+_56459315.23-P1P2	AMFR_-_56459192.23-P1P2	GCAGCGACGCCAGAGCCCGT	ACACGGGCCTCAGCGGCCTC
AMH	P1P2	AMH_+_2248626.23-P1P2	AMH_-_2248783.23-P1P2	GAGGCTGTTTAATGAGCGGG	ACAGGTGTCTCCTGGCGGGC
AMHR2	P1P2	AMHR2_+_53818923.23-P1P2	AMHR2_+_53819137.23-P1P2	GGACATCAAGGCAAGAATGC	GGACTCCCATGACCTCTCAC
AMICA1	P1P2	AMICA1_-_118095677.23-P1P2	AMICA1_-_118095755.23-P1P2	GCAAGATGAAGAGCACCCAG	AACCTAGAGTGCTCGCAGCC
AMIGO1	P1P2	AMIGO1_-_110052323.23-P1P2	AMIGO1_-_110052326.23-P1P2	GGGAGGCGCAGCGATCCCAG	CCGCTGGGATCGCTGCGCCC
AMIGO2	P1P2	AMIGO2_+_47473698.23-P1P2	AMIGO2_-_47473651.23-P1P2	GCAGGAGGCAGGACGCGCAG	CGGGTCCTGCAGCCTCCCGC
AMIGO3	P1	AMIGO3_+_49761355.23-P1	AMIGO3_-_49761366.23-P1	GGGGCCAGCAGCCGTCTACC	TCTACCCGGTGTCGCGTTCC
AMMECR1	P1P2	AMMECR1_-_109561250.23-P1P2	AMMECR1_+_109561312.23-P1P2	GCGCCACCCGAGCCAGAGGG	CCACGCAGCGTTTCCGACCC
AMMECR1L	P1P2	AMMECR1L_+_128643208.23-P1P2	AMMECR1L_-_128643556.23-P1P2	GAGCGGGGGGGAGGAGTCCC	CCGCCCGCCGGCCTCCTTCC
AMN	P1	AMN_+_103389039.23-P1	AMN_-_103389029.23-P1	GCTGCAGCCACAGCAGGACC	ATCTCGCCTCGGCTCCTTGC
AMN	P2	AMN_+_103395231.23-P2	AMN_-_103395024.23-P2	GCGCGGAAGGAGGCACTAGG	CGCGTCTGAGCACGACCTCC
AMN1	P1P2	AMN1_-_31881933.23-P1P2	AMN1_-_31881912.23-P1P2	GGAGCTGACTGACCCGCCGT	GGATCTGTGAGTCTACCCTC
AMOT	P1P2	AMOT_-_112084054.23-P1P2	AMOT_-_112084018.23-P1P2	GCAGCTCCTGGGCAAAGGAT	CTTCCTTCCGAGGAGCTTTC
AMOTL1	P1P2	AMOTL1_-_94501700.23-P1P2	AMOTL1_-_94501686.23-P1P2	GGTGGAGGGCAAAGTTGCGC	TCCACATGAGGCGATCATGC
AMOTL2	P1P2	AMOTL2_+_134093279.23-P1P2	AMOTL2_+_134093271.23-P1P2	GGCGCGAACAGCCAGAGCGT	TGGCGCCGACGCTCTGGCTC
AMPD1	P1P2	AMPD1_-_115238088.23-P1P2	AMPD1_-_115238116.23-P1P2	GTACCTGGGAGTTTGAACAG	AGAATCAAGGATTTCAGCAC
AMPD2	P1	AMPD2_-_110162501.23-P1	AMPD2_+_110162524.23-P1	GGAGCCGGCGAGATTTTGGT	ACAGTCCGGCCGCGGGAGTC
AMPD2	P2	AMPD2_+_110163780.23-P2	AMPD2_-_110163800.23-P2	GGCCATGGCTGGGACCACGG	TGGCTGGGACCACGGCGGCC
AMPD3	P1P2	AMPD3_-_10476823.23-P1P2	AMPD3_-_10476980.23-P1P2	GGCCTTCCCACTCTCCTAAA	ACGTGGGCCTCCAGCTCCGC
AMPH	P1P2	AMPH_+_38670931.23-P1P2	AMPH_-_38670993.23-P1P2	GCCATGGCCGACATCAAGAC	CTGCGCGCTCTGCTCTTCGC
AMT	P1P2	AMT_+_49459848.23-P1P2	AMT_-_49459857.23-P1P2	GTAAGTGTGGTGGCCCGTCT	GTCTGGGCTTTCGCCTGCAC
AMTN	P1P2	AMTN_+_71384334.23-P1P2	AMTN_+_71384355.23-P1P2	GGCAAAATGTACAATACTCA	CGTGGACCCAAAGGTAACAC
AMY1B	ENST00000330330.5,ENST00000370080.3	AMY1B_-_104239004.23-ENST00000330330.5,ENST00000370080.3	AMY1B_-_104238984.23-ENST00000330330.5,ENST00000370080.3	GGGTATGTACAGATACCAAG	TTGATGTCAGTGTTTAGTAC
AMY2A	P1P2	AMY2A_+_104159553.23-P1P2	AMY2A_+_104159726.23-P1P2	GCCAACCCTGACAGACTGAC	TTCTGGATCTTTAAAGAGAC
AMY2B	P1P2	AMY2B_-_104104409.23-P1P2	AMY2B_-_104104404.23-P1P2	GGTAGTAAGAAGAGGTGGCA	CCTCTTCTTACTACACTATC
AMZ1	P1P2	AMZ1_+_2727860.23-P1P2	AMZ1_+_2727832.23-P1P2	GGAGCCCCGGGCAGCAGCGT	GATCCTCCCGGCCCAGGCCC
AMZ2	P1P2	AMZ2_-_66244231.23-P1P2	AMZ2_-_66244242.23-P1P2	GCGTGAGGGCTGCCGCGGGT	CGATACCACCCACCCGCGGC
ANAPC1	P1P2	ANAPC1_-_112641691.23-P1P2	ANAPC1_-_112641707.23-P1P2	GGAAGAACGGGCAACAGCAG	TTAGCACTCGAGCCCGCTGC
ANAPC10	P1P2	ANAPC10_+_146019314.23-P1P2	ANAPC10_+_146019317.23-P1P2	GTGGCGAAGCCAGCTGCTGG	GCAGCTGGCTTCGCCAACGC
ANAPC11	P1P2	ANAPC11_-_79849637.23-P1P2	ANAPC11_+_79849685.23-P1P2	GGACTCGGCGGGCGCTGTTG	GCGCTGCCAACGGAAGGGCC
ANAPC15	P1P2	ANAPC15_+_71823713.23-P1P2	ANAPC15_-_71823727.23-P1P2	GAGCGCTTCCGGGTCGCCGC	GGTCGCCGCCGGCAGCAGCC
ANAPC16	P1P2	ANAPC16_+_73975790.23-P1P2	ANAPC16_-_73975804.23-P1P2	GGTGTTCGCCCCCCAACAGA	CCCAACAGACGGAGCCAGCC
ANAPC7	P1P2	ANAPC7_-_110841548.23-P1P2	ANAPC7_+_110841268.23-P1P2	GGGTCCATCGGGTCCACACG	CCGCTCCCAGACCGCCGCCC
ANG	P1P2	ANG_-_21152854.23-P1P2	ANG_+_21152724.23-P1P2	GCGTACTAGGGAGGAAGAAG	CCATCTCCGTCCGTGTACAC
ANGEL1	P1P2	ANGEL1_+_77278971.23-P1P2	ANGEL1_+_77278828.23-P1P2	GGCAGTGCCGAGGTGTAGGG	GTCCACAGCTCCTCTCCACC
ANGEL2	P1P2	ANGEL2_+_213188508.23-P1P2	ANGEL2_+_213188808.23-P1P2	GTGTGGCACACGCCCAGGAG	GGATGCACCATCGCCCAGAC
ANGPT1	P1P2	ANGPT1_+_108510112.23-P1P2	ANGPT1_+_108510118.23-P1P2	GGCAGATAGGGTAGAGGAAA	CTACCCTATCTGCTGCAGAC
ANGPT2	P1P2	ANGPT2_+_6420744.23-P1P2	ANGPT2_+_6420752.23-P1P2	GACTGACACTGTAGGATCTG	ACAGTGTCAGTATCCGAATC
ANGPT4	P1P2	ANGPT4_+_896929.23-P1P2	ANGPT4_+_896968.23-P1P2	GAGGCAAGCCTGGCCACTGT	CTGTCTGGCCGAGCTCTGTC
ANGPTL1	P1P2	ANGPTL1_+_178840213.23-P1P2	ANGPTL1_-_178840143.23-P1P2	GAGAGGGAATCACTATTCAG	CAACGCTTTCTCTGCTGGAC
ANGPTL2	P1P2	ANGPTL2_-_129884872.23-P1P2	ANGPTL2_+_129884905.23-P1P2	GGCCACGCTCGGCAGGTCCA	CATTTGAACTCCCAACTCCC
ANGPTL3	P1P2	ANGPTL3_-_63063180.23-P1P2	ANGPTL3_+_63063286.23-P1P2	GATATAGAGTTAAGAAGTCT	GAATTGATCAAGACAATTCC
ANGPTL4	P1P2	ANGPTL4_-_8429281.23-P1P2	ANGPTL4_+_8429075.23-P1P2	GTGCTACTGAGCGCTCAGGG	ATTCTTTCCAGCGGCTTCTC
ANGPTL5	P1P2	ANGPTL5_+_101778543.23-P1P2	ANGPTL5_+_101778356.23-P1P2	GAACTGTGTACATCATTCTA	CAGTTTATAGTTTCCTCAGC
ANGPTL6	P1P2	ANGPTL6_-_10213594.23-P1P2	ANGPTL6_-_10213591.23-P1P2	GGCAGAGCCCAGAGCGTGGG	ACGCTCTGGGCTCTGCAGTC
ANGPTL7	P1P2	ANGPTL7_+_11249437.23-P1P2	ANGPTL7_-_11249433.23-P1P2	GTCTGACAGGGGAGCTGAAT	ATAGCTTTCCTTCCAAGCCC
ANHX	P1P2	ANHX_+_133812391.23-P1P2	ANHX_+_133812402.23-P1P2	GCGCTGAAGCGGGTCCCGGA	CTTCAGCGCCGGCGCACGTC
ANK1	P1P2	ANK1_-_41655052.23-P1P2	ANK1_-_41655095.23-P1P2	GCGCGGAAGCCCACAGAATA	CCAAGGCCCTTCGGCGGGCC
ANK2	ENST00000264366.6	ANK2_-_113970949.23-ENST00000264366.6	ANK2_-_113970921.23-ENST00000264366.6	GGTTCAACGGCAGTAGTCAG	CTGTCGCTTTTCTGAGCTGC
ANK3	P1P2	ANK3_+_62149513.23-P1P2	ANK3_+_62149538.23-P1P2	GCACTCTCCTGTAAAGGTTC	TCGTAATGCATTTACCGTAC
ANKAR	P1P2	ANKAR_+_190539422.23-P1P2	ANKAR_-_190539475.23-P1P2	GGCCCTCAGGGCCTCCGCAA	CAGATGGCTTCTCGCGGGGC
ANKDD1A	P1P2	ANKDD1A_-_65204135.23-P1P2	ANKDD1A_-_65204113.23-P1P2	GCTGCGGAGCGGCAGGATGC	CTGCGCGCGCTGGTGCCCGC
ANKDD1B	P1P2	ANKDD1B_+_74907371.23-P1P2	ANKDD1B_-_74907546.23-P1P2	GCGGACACAGATCCAGACCC	TGAGACCCTTGGCGGCCGCC
ANKEF1	P1P2	ANKEF1_+_10015769.23-P1P2	ANKEF1_-_10015901.23-P1P2	GGCTGGCGCGCGGGACAGCA	CTGCTCTCGTCCTCTGACGC
ANKFN1	P1P2	ANKFN1_-_54231022.23-P1P2	ANKFN1_-_54230873.23-P1P2	GCTGGTGAGCATCCATGGTC	TGAGAGACACAGGACTGAGC
ANKFY1	P1P2	ANKFY1_-_4167096.23-P1P2	ANKFY1_-_4167060.23-P1P2	GAGCTCCGGAGAGGCTAGAC	GAGCGCGGTTCCTATGACAC
ANKH	P1P2	ANKH_-_14871820.23-P1P2	ANKH_-_14871737.23-P1P2	GATCTGCCGGGAAAAAAAAG	CGCTCGGAGAAGGCGCCGCC
ANKHD1	P1P2	ANKHD1_+_139781466.23-P1P2	ANKHD1_-_139781432.23-P1P2	GGAACGAGAAGAGCAGCAAG	CTAACTTCTCACTGCCTAAC
ANKHD1-EIF4EBP3	P1P2	ANKHD1-EIF4EBP3_+_139781466.23-P1P2	ANKHD1-EIF4EBP3_-_139781432.23-P1P2	GGAACGAGAAGAGCAGCAAG	CTAACTTCTCACTGCCTAAC
ANKIB1	P1P2	ANKIB1_-_91875700.23-P1P2	ANKIB1_+_91875590.23-P1P2	GCACCCGGGCCGGCGAGGAA	CGCCGCGGGCGCCTTCGGCC
ANKK1	P1P2	ANKK1_+_113258562.23-P1P2	ANKK1_+_113258540.23-P1P2	GCGCCGCGCACTCCCCGCTG	TCGGCCACCCAGGCAGCAGC
ANKLE1	P1P2	ANKLE1_-_17392727.23-P1P2	ANKLE1_+_17392722.23-P1P2	GTGCGCTTCGGACCCAGCCA	GGGCATGTGCTCGGAGGCCC
ANKLE2	P1P2	ANKLE2_+_133338375.23-P1P2	ANKLE2_+_133338404.23-P1P2	GCCGGGCGGCGGCGATGCTG	CCGAGAAGCCCGCGCCCCGC
ANKMY1	P1P2	ANKMY1_+_241497155.23-P1P2	ANKMY1_+_241497400.23-P1P2	GCTGGGGGCGTGGGGTTAGG	ACGGAGAGCGTCGCGTTTCC
ANKMY2	P1P2	ANKMY2_+_16685345.23-P1P2	ANKMY2_-_16685324.23-P1P2	GTGTCCGCCAGCCCGCGGGA	CGGTTGGCTACTCAGTGTCC
ANKRA2	P1P2	ANKRA2_-_72861421.23-P1P2	ANKRA2_+_72861375.23-P1P2	GCCGGAGTACTACACAGACA	TTACGCTCCGAGGCCCATCC
ANKRD1	P1P2	ANKRD1_+_92680828.23-P1P2	ANKRD1_+_92680850.23-P1P2	GCCCAGCAGGGCCAACTCCA	CTCCACACCGGTCAGCTTAC
ANKRD10	P1P2	ANKRD10_+_111567378.23-P1P2	ANKRD10_-_111567334.23-P1P2	GAGCCTGTGGGACGCGACCG	CCCCGACGCGTCCTCTAGGC
ANKRD11	P1P2	ANKRD11_+_89556932.23-P1P2	ANKRD11_-_89556765.23-P1P2	GACGGTGCGCGATGGACCGA	CCGCCTTGCCGCTCGGGCCC
ANKRD12	P1P2	ANKRD12_-_9136808.23-P1P2	ANKRD12_+_9137050.23-P1P2	GCGCTGTCCTGGGAGCGAGG	CTCAGTTCTGCGCTGCTCCC
ANKRD13A	P1P2	ANKRD13A_+_110437230.23-P1P2	ANKRD13A_-_110437263.23-P1P2	GGCTCGCGGACAGACTTCTG	GCGCTGACAGCTCGCGGACC
ANKRD13B	P1P2	ANKRD13B_+_27920377.23-P1P2	ANKRD13B_+_27920172.23-P1P2	GGGAGGGAGCGGGCACTCGG	CGTATCCCGCGCCGGCCGCC
ANKRD13C	P1P2	ANKRD13C_+_70820351.23-P1P2	ANKRD13C_-_70820382.23-P1P2	GCGGTGTAAGGCAGCGACGG	TGTTTTTCGGTGTAAGGCAC
ANKRD13D	P1P2	ANKRD13D_+_67056813.23-P1P2	ANKRD13D_-_67056373.23-P1P2	GGCGGCCCCCGCAGCAGTAG	CGGTCTTCCTACCCCAGGTC
ANKRD16	P1P2	ANKRD16_+_5931865.23-P1P2	ANKRD16_+_5931814.23-P1P2	GCAGGAACGCCGGCCCCCAG	AAGCGTGACCTGCCCCGCAC
ANKRD17	P1P2	ANKRD17_+_74124315.23-P1P2	ANKRD17_+_74124528.23-P1P2	GGAAGGGAGCCCCCCGGCGG	CCGCTCCGCCAGCTCTCACC
ANKRD18A	ENST00000564591.1,ENST00000566717.2	ANKRD18A_-_38577100.23-ENST00000564591.1,ENST00000566717.2	ANKRD18A_+_38576705.23-ENST00000564591.1,ENST00000566717.2	GGCTTTCACTGCTCCTGCAA	ATTTAGGGAAATTCTGACAC
ANKRD18B	P1P2	ANKRD18B_-_33524277.23-P1P2	ANKRD18B_-_33524270.23-P1P2	GCACTCTATCGAGAGGTCGG	CTCGATAGAGTGAGCCCAGC
ANKRD2	P1P2	ANKRD2_-_99332575.23-P1P2	ANKRD2_-_99332572.23-P1P2	GACCATGGAGGACTCCGAGG	CGGAGTCCTCCATGGTGCCC
ANKRD22	P1P2	ANKRD22_-_90611584.23-P1P2	ANKRD22_+_90611514.23-P1P2	GGCCCAGCCCAATGAAACAA	GTCAGTGCTTTTCCAGCAGC
ANKRD23	P1	ANKRD23_-_97523606.23-P1	ANKRD23_+_97523642.23-P1	GGGCCTGGTGAGAACCACGA	CCAGCGTCTGCTGTACGCCC
ANKRD23	P2	ANKRD23_+_97509682.23-P2	ANKRD23_-_97509672.23-P2	GTGGTAAGGATGTGGGACGG	TGGGACCGGCTTGATAGGAC
ANKRD24	P1P2	ANKRD24_+_4198441.23-P1P2	ANKRD24_+_4198444.23-P1P2	GCGCACGGGGTTCCAAGAGG	CTTGGAACCCCGTGCGCCCC
ANKRD26	P1P2	ANKRD26_-_27389221.23-P1P2	ANKRD26_+_27389387.23-P1P2	GGCCGCGCGAAGGAGCCCAA	CCGGGTTACCAAGCAAGCGC
ANKRD27	P1P2	ANKRD27_+_33166026.23-P1P2	ANKRD27_+_33166056.23-P1P2	GTCCCAGCAGCGGACGAGGG	ACCACCCTCGCGCGGCGATC
ANKRD28	P1P2	ANKRD28_-_15839402.23-P1P2	ANKRD28_+_15839382.23-P1P2	GTCCCACAGAAGCATTCCAA	ACAGAAGCATTCCAACGGAC
ANKRD29	P1P2	ANKRD29_-_21242795.23-P1P2	ANKRD29_+_21242843.23-P1P2	GCTCTCGGCGTTCCGCAGAG	CACACAGGGCCGGGCCGAAC
ANKRD30A	P1P2	ANKRD30A_+_37414734.23-P1P2	ANKRD30A_+_37414731.23-P1P2	GCCCGGCACGACCTTGACAG	CCGCTGTCAAGGTCGTGCCC
ANKRD30B	P1P2	ANKRD30B_+_14748218.23-P1P2	ANKRD30B_-_14748199.23-P1P2	GTGAACACTCCGGCCTCTGT	TTAGCTGCTCTAACGTTAGC
ANKRD31	P1P2	ANKRD31_-_74532673.23-P1P2	ANKRD31_-_74532663.23-P1P2	GGGGCTGCTGAGGAGGACGC	CAGCAGCCCTGCGACAAGTC
ANKRD32	P1P2	ANKRD32_+_93954429.23-P1P2	ANKRD32_+_93954438.23-P1P2	GCTTCCTTCGGTGGCAGCGG	CCGAAGGAAGCATCCCAGAC
ANKRD33	P1P2	ANKRD33_+_52282089.23-P1P2	ANKRD33_+_52282132.23-P1P2	GGGTTCGTAGGGTATCTATG	TCTCTCCGTGAGTCTCACTC
ANKRD33B	P1P2	ANKRD33B_+_10564429.23-P1P2	ANKRD33B_+_10564449.23-P1P2	GGGCGGAAACCGGCACCAGG	AGCTGGAGCGCGCGGGCCAC
ANKRD34A	P1	ANKRD34A_-_145472547.23-P1	ANKRD34A_+_145472473.23-P1	GGCGCAGATACTGACACCAA	GCGCTGTGCCCGGGGCGCTC
ANKRD34A	P2	ANKRD34A_-_145470559.23-P2	ANKRD34A_-_145470579.23-P2	GGCGGGTCGCAGAGAGAGAT	CAGCTGATTCTGCAACGCCC
ANKRD34B	P1	ANKRD34B_+_79866043.23-P1	ANKRD34B_-_79866050.23-P1	GCAGCTCAGACGGCGCCCTA	TAGGGCCGCACAGAGGGTCC
ANKRD34B	P2	ANKRD34B_-_79864939.23-P2	ANKRD34B_-_79864923.23-P2	GTCAAGGCGCTGTCGGAGAA	TGAGCTCGCTTCCTCCTGCC
ANKRD34C	P1P2	ANKRD34C_+_79575155.23-P1P2	ANKRD34C_-_79575161.23-P1P2	GCTGCGCAGCCCCAGACCTC	CCGGCTTGGTCTTCGGCCGC
ANKRD35	P1P2	ANKRD35_-_145562333.23-P1P2	ANKRD35_-_145562352.23-P1P2	GGCAGTTGCGACAGAGTGTG	GTTCATTTGTCAGCAGCCCC
ANKRD36	P1P2	ANKRD36_+_97779467.23-P1P2	ANKRD36_-_97779499.23-P1P2	GTGCCGTCTTCCATAATCGT	CTCCCGCTTGCCGTCTTCCC
ANKRD36C	P1P2	ANKRD36C_-_96657460.23-P1P2	ANKRD36C_-_96657464.23-P1P2	GGGCTCCTTGTCATCCATAA	ACCATTATGGATGACAAGGC
ANKRD37	P1P2	ANKRD37_-_186317926.23-P1P2	ANKRD37_+_186317774.23-P1P2	GTCGGGCGTAACCGGAGCTG	ATCGGCGGATGGCCTCGCGC
ANKRD39	P1P2	ANKRD39_-_97523708.23-P1P2	ANKRD39_-_97523728.23-P1P2	GAGCAGGGCCCGTCCGCGCA	GGATGGCGACGCCTCGGCCC
ANKRD40	P1P2	ANKRD40_+_48785164.23-P1P2	ANKRD40_+_48785242.23-P1P2	GGGAGGGAGCGGAAGTCCCG	CCCGAAGGCCGGCTCCGGGC
ANKRD42	P1P2	ANKRD42_-_82904842.23-P1P2	ANKRD42_+_82905009.23-P1P2	GGACTCCGAGAAAGTACCAG	CTCCAGGGTCGCTGCAGGAC
ANKRD44	ENST00000328737.2	ANKRD44_-_198062864.23-ENST00000328737.2	ANKRD44_-_198062882.23-ENST00000328737.2	GAGGCTGTGAGCAGAAGCTA	GTGTATGTTCAGGCTCCCTC
ANKRD44	ENST00000450567.1	ANKRD44_+_198051801.23-ENST00000450567.1	ANKRD44_-_198051829.23-ENST00000450567.1	GTGGTTCAGGCAATCTTCAG	CCATTGGTTCAGGCAATCTC
ANKRD45	P1P2	ANKRD45_+_173638942.23-P1P2	ANKRD45_+_173638762.23-P1P2	GCCGGGTGTGGTGAGTCTAG	TTGCGGCTGCCGGCGGGGTC
ANKRD46	P1P2	ANKRD46_-_101571968.23-P1P2	ANKRD46_-_101571982.23-P1P2	GGAACGAGCAGCAGCGACAG	CCTTGAAGCTGCCGCTGTCC
ANKRD49	P1P2	ANKRD49_-_94226994.23-P1P2	ANKRD49_-_94227181.23-P1P2	GGCCGTAAACCTGAATTCCG	CCTTGCATCTCACTTCCGGC
ANKRD50	P1P2	ANKRD50_+_125633644.23-P1P2	ANKRD50_+_125633864.23-P1P2	GGACTGAGAGTCCCTAACAG	CCGCCGTCAGGGCAGTAACC
ANKRD52	P1P2	ANKRD52_+_56652106.23-P1P2	ANKRD52_-_56652120.23-P1P2	GGGCCGCTCCGTGTCCCCGG	TGTCCCCGGTGGAGCCGCCC
ANKRD53	P1P2	ANKRD53_-_71205788.23-P1P2	ANKRD53_+_71206088.23-P1P2	GGCCCCGCGATGGCCTCCGC	GAGAGGTGCCTAGGCCGTGC
ANKRD54	P1P2	ANKRD54_+_38240313.23-P1P2	ANKRD54_+_38240316.23-P1P2	GCTGACAGCACGACTCAGGG	TGAGTCGTGCTGTCAGCGAC
ANKRD55	ENST00000341048.4	ANKRD55_-_55529169.23-ENST00000341048.4	ANKRD55_+_55529195.23-ENST00000341048.4	GTGGGTGAGTGAGGATTCAC	ATGCAGTTCGCATTCGGCTC
ANKRD6	P1P2	ANKRD6_-_90142922.23-P1P2	ANKRD6_-_90142974.23-P1P2	GTCGGCCACAGGTAACCCGC	CCCAGCGCCGTGCCTCCAGC
ANKRD60	ENST00000457363.1	ANKRD60_+_56803320.23-ENST00000457363.1	ANKRD60_+_56803339.23-ENST00000457363.1	GAGGAGCTGGACCTGATGGT	CTTTGAGCTCCCGCACGGTC
ANKRD61	P1P2	ANKRD61_-_6071023.23-P1P2	ANKRD61_+_6071171.23-P1P2	GTCTCATGGGGAATATAACC	ATCACCATTCTGCCCAACTC
ANKRD62	P1P2	ANKRD62_-_12094120.23-P1P2	ANKRD62_-_12094092.23-P1P2	GAAATCCCGGGTACCGAGTC	TCCTTGTCACGATTCTTCCC
ANKRD63	P1P2	ANKRD63_+_40575241.23-P1P2	ANKRD63_-_40575214.23-P1P2	GGGAGCGGCGCGCCCCGCCA	CCGTCGCTGCGGGGGAGCGC
ANKRD65	P1	ANKRD65_-_1356630.23-P1	ANKRD65_+_1356462.23-P1	GCCTTCTGCAGGCTTTGGGG	CCCATTCCAGTTACCACTTC
ANKRD65	P2	ANKRD65_+_1355480.23-P2	ANKRD65_-_1355292.23-P2	GCGCGGGTGGACGCCCGGGA	CTCCGGTGTAGCCCCGTCCC
ANKRD66	P1P2	ANKRD66_-_46714675.23-P1P2	ANKRD66_-_46714684.23-P1P2	GTGGCATGGACACAACACTC	AACCATCCGGAGTGTTGTGC
ANKRD7	P1	ANKRD7_+_117864793.23-P1	ANKRD7_-_117864809.23-P1	GCTCTGCCCTGGCATCCGGC	TGGCATCCGGCCGGCAGCCC
ANKRD7	P2	ANKRD7_-_117854724.23-P2	ANKRD7_-_117854746.23-P2	GAGCACGCCGGCTCTAGCGG	CCAGACCTAGCAAAGACCAC
ANKRD9	P1P2	ANKRD9_-_102976042.23-P1P2	ANKRD9_+_102976027.23-P1P2	GCCGCGGCCGGATCGCAGGG	GATCGCAGGGCGGCGGTGCC
ANKS1A	P1P2	ANKS1A_+_34857078.23-P1P2	ANKS1A_+_34857121.23-P1P2	GGGCAACGCACCCCCCAAAC	GAGCAGGCTCGGCTGCAGCC
ANKS1B	ENST00000329257.7,ENST00000547776.2	ANKS1B_+_100378180.23-ENST00000329257.7,ENST00000547776.2	ANKS1B_+_100377870.23-ENST00000329257.7,ENST00000547776.2	GAAGCTGCGCCCCGAAGAGG	GTCCTTACCTTAGCAGATTC
ANKS3	P1P2	ANKS3_+_4784206.23-P1P2	ANKS3_+_4784180.23-P1P2	GTGGCGGCGAGCTGTTTGGG	CCCTCGGGCTGCCGTCGCCC
ANKS4B	P1P2	ANKS4B_+_21245002.23-P1P2	ANKS4B_-_21245045.23-P1P2	GTCCAGGCAGAGCAAGGTGT	GAACTTGGCCAGATGTCTCC
ANKS6	P1P2	ANKS6_+_101558828.23-P1P2	ANKS6_+_101558759.23-P1P2	GGCCTGCGGGCGGTATCCGG	CCCTCGCCCATCGCCGCCGC
ANKUB1	ENST00000446160.1	ANKUB1_-_149510608.23-ENST00000446160.1	ANKUB1_-_149510259.23-ENST00000446160.1	GGATTGGGATGCACTAGCAC	CTGGCTATCATTTTTGTCCC
ANKZF1	P1P2	ANKZF1_+_220094599.23-P1P2	ANKZF1_+_220094583.23-P1P2	GAAACGTCCCGGGAGCTGAG	GAGGACTTGCGAGCCGCTCC
ANLN	P1P2	ANLN_-_36429483.23-P1P2	ANLN_-_36429499.23-P1P2	GCAGAGGCCGAGTCCGTCAC	CTCCTCTCGGCTTCCAGTGC
ANO1	P1P2	ANO1_-_69924499.23-P1P2	ANO1_-_69924717.23-P1P2	GCGGCGCGATCGGCCCCGAG	CATCGTGGCCGCCTGTGCGC
ANO10	P1P2	ANO10_-_43663459.23-P1P2	ANO10_-_43663456.23-P1P2	GGAGAGCCGGCGAGAACCGG	GTTCTCGCCGGCTCTCGGAC
ANO2	P1P2	ANO2_-_6054389.23-P1P2	ANO2_+_6054306.23-P1P2	GCCCGGGAGTCGCCATGATG	TCCCTCCTACCACCTGTAGC
ANO3	P1P2	ANO3_+_26353776.23-P1P2	ANO3_-_26353758.23-P1P2	GCTTAGGGAGCTGCCCGAGA	GACTCTAGACGCTCCAAGGC
ANO4	P1P2	ANO4_+_101188701.23-P1P2	ANO4_+_101188698.23-P1P2	GGAACCTCCAGGCTCCAGTC	CCCGACTGGAGCCTGGAGGC
ANO5	P1P2	ANO5_-_22214662.23-P1P2	ANO5_-_22214643.23-P1P2	GTGGCGAGCACCGGGAGGAG	GGATCCTTTCCACTCCTGCC
ANO6	P1P2	ANO6_-_45609917.23-P1P2	ANO6_-_45609946.23-P1P2	GGCAGGCGAGAGGCGTCCTC	AGGCACCCACCGACCGGAGC
ANO7	P1P2	ANO7_+_242157675.23-P1P2	ANO7_+_242157714.23-P1P2	GTAGGCGCGCGGCAGGAAGT	ACGACCTGCGCGGCTTCCTC
ANO8	P1P2	ANO8_-_17445502.23-P1P2	ANO8_-_17445543.23-P1P2	GCGAGGACAGGTCAGGTCAG	ATGAGCCCGCGGCTCCCCGC
ANO9	P1P2	ANO9_+_441993.23-P1P2	ANO9_+_441978.23-P1P2	GCCCCACGCGGAAGTCAGGT	GCGGCGGGTGCTCCTACCTC
ANP32A	P1P2	ANP32A_-_69112836.23-P1P2	ANP32A_-_69113252.23-P1P2	GACAGGTAGTCACACACCAA	CCACGGCGATCAGGTTAGTC
ANP32B	P1P2	ANP32B_+_100745631.23-P1P2	ANP32B_-_100745885.23-P1P2	GCGGGAGCGGAGAGAAACCA	GGGTCCGGTTCCTCAGCTCC
ANP32D	P1P2	ANP32D_-_48866393.23-P1P2	ANP32D_-_48866604.23-P1P2	GATGTGCGGTTGTGGGTTCG	ATGTTGATTGTATTTAATAC
ANP32E	P1P2	ANP32E_+_150208436.23-P1P2	ANP32E_-_150208476.23-P1P2	GTCTCTGAGCAGCCATTGAA	TGTCATGGAGGCTCAGTCTC
ANPEP	P1	ANPEP_+_90358037.23-P1	ANPEP_-_90358028.23-P1	GCGCAGCTCGGAACCCGCCA	GGTTCCAGCGCCCGGCGGCC
ANPEP	P2	ANPEP_-_90349821.23-P2	ANPEP_-_90349839.23-P2	GAAGCCCTTGGCCATGGTGA	TGAGCCGCCTCCCCACCATC
ANTXR1	P1P2	ANTXR1_+_69240562.23-P1P2	ANTXR1_+_69240935.23-P1P2	GGAACTCGCCACGACCCTCA	TTGTTGGGGCGCGCTCCTCC
ANTXR2	P1P2	ANTXR2_-_80994347.23-P1P2	ANTXR2_+_80994354.23-P1P2	GTGGAGAGAAGCCACGCCGA	GCTCGGGCCGGGTCTGGGCC
ANXA1	P1P2	ANXA1_-_75766840.23-P1P2	ANXA1_+_75766778.23-P1P2	GTGCAAGAAGGTAGAGATAA	GTGTGAAATCTTCAGAGAAC
ANXA10	P1P2	ANXA10_+_169013714.23-P1P2	ANXA10_-_169013780.23-P1P2	GCACTGTTCACCTCAGACTC	GAAAGAATTAAGGTTCACTC
ANXA11	P1P2	ANXA11_-_81965250.23-P1P2	ANXA11_-_81965296.23-P1P2	GCGGGGCACTCGGGGCACTG	CGGAGTTTTCCGCCCGGCGC
ANXA13	P1P2	ANXA13_+_124749624.23-P1P2	ANXA13_+_124749651.23-P1P2	GTGTTGTAAACTTTGCCTGT	CCCGGACATAATATCTCTTC
ANXA2	P1P2	ANXA2_-_60690116.23-P1P2	ANXA2_-_60690106.23-P1P2	GGCTAGCTGGCGGCCCATCG	CCAGCTAGCGGGGTGTGGAC
ANXA2R	P1P2	ANXA2R_-_43040242.23-P1P2	ANXA2R_-_43040188.23-P1P2	GTATGCTCTGCAGAGCCCGT	TCCTTGATCAGCGCAAACGC
ANXA3	P1P2	ANXA3_+_79472940.23-P1P2	ANXA3_-_79472946.23-P1P2	GGAGCGAAGGTGTCAGCCGC	CGGGCGCAGGTGCTCCGCGC
ANXA4	P1P2	ANXA4_-_69969324.23-P1P2	ANXA4_+_69969241.23-P1P2	GCTCGGTACGAGGGGTAAAG	CTGTCTGGCCCTGAGTAGGC
ANXA5	P1P2	ANXA5_-_122618118.23-P1P2	ANXA5_-_122618086.23-P1P2	GATGCAGACGCTGAAGGATC	CGCGTACCGTCGCCCGGCTC
ANXA6	P1P2	ANXA6_-_150537278.23-P1P2	ANXA6_+_150537317.23-P1P2	GGGGTCGCAGACGGACGCAC	GTTAGCCCAGCAGCAACCGC
ANXA7	P1P2	ANXA7_+_75173793.23-P1P2	ANXA7_-_75173729.23-P1P2	GTCTTGCGGGAGACCGGGTT	CGGTGGTCTTGCCCTCGGCC
ANXA8	P1P2	ANXA8_-_48255419.23-P1P2	ANXA8_-_48255402.23-P1P2	GCCTGGGAAAGGTGCCCCCG	GGGAGATGAAGAGACACAGC
ANXA8L1	ENST00000359178.4	ANXA8L1_-_47173947.23-ENST00000359178.4	ANXA8L1_+_47173943.23-ENST00000359178.4	GCCTCGGGGGCACCTTTCCC	GGGAGATGAAGAGACACAGC
ANXA9	P1P2	ANXA9_-_150954803.23-P1P2	ANXA9_+_150954830.23-P1P2	GCCGGAGGCAGTGCTCACAC	ACCTCACCTCTGGCACCTCC
AOAH	P1P2	AOAH_-_36764004.23-P1P2	AOAH_-_36764000.23-P1P2	GCCACACACAAAGAGCTGGA	GCTCTTTGTGTGTGGCTCTC
AOC1	P1	AOC1_-_150549631.23-P1	AOC1_-_150549683.23-P1	GGCTGGAAGCAGAGCGAACT	CTTCTTGACTCTCCCGAATC
AOC1	P2	AOC1_-_150553650.23-P2	AOC1_+_150553853.23-P2	GGACTCTGCCCAGGAAGGCA	TCATCTTCTTTGGTGACCAC
AOC2	P1P2	AOC2_+_40996638.23-P1P2	AOC2_+_40996660.23-P1P2	GACTATCTTGAGATGCATGG	GGCGTTCCTGGCACTGTCCC
AOC3	P1P2	AOC3_+_41003290.23-P1P2	AOC3_-_41003258.23-P1P2	GTCTCACGCCAGCAAGACGG	GGACTCTGGCTGAGGTTCCC
AOX1	P1	AOX1_+_201450796.23-P1	AOX1_-_201450834.23-P1	GCTGGTTCGAGGGCCCGGAG	TTGTGGTGTCCGCGCTGGTC
AOX1	P2	AOX1_+_201474091.23-P2	AOX1_+_201474232.23-P2	GAGTTACCCACAGCCAGGAT	TATAATATCAATACATTTCC
AP1AR	P1P2	AP1AR_-_113152975.23-P1P2	AP1AR_-_113152987.23-P1P2	GCTAGGAGCTGAGGCGAGAA	TCCGCATGGCCCTTCTCGCC
AP1B1	P1P2	AP1B1_+_29784481.23-P1P2	AP1B1_+_29784492.23-P1P2	GGACGCACCGGGAGAGCGAG	GGTGCGTCCGGGCTGCCGGC
AP1G1	P1P2	AP1G1_-_71842702.23-P1P2	AP1G1_-_71842491.23-P1P2	GATGAAACCAGCAGCTCCGG	ACTTCTGGAGGGCCGACCCC
AP1G2	P1P2	AP1G2_+_24036742.23-P1P2	AP1G2_+_24036800.23-P1P2	GGCGCATGCTCAATAGGAAG	ACCTGGTACCCCATCCCTAC
AP1M1	P1P2	AP1M1_-_16308731.23-P1P2	AP1M1_+_16308778.23-P1P2	GCTCCCCGAACCGGAAGTGG	ACCGTCGCTGCCGCCGCCAC
AP1M2	P1P2	AP1M2_-_10697754.23-P1P2	AP1M2_-_10697911.23-P1P2	GGGGATTCCCAGGGATTGCA	CCATGTCCGCCTCGGCTGTC
AP1S1	P1P2	AP1S1_-_100797802.23-P1P2	AP1S1_-_100797757.23-P1P2	GCCGGAGGCTGCAGGATGGT	TAGGCGCCAGTCCCACTCCC
AP1S2	P1P2	AP1S2_-_15872939.23-P1P2	AP1S2_-_15872932.23-P1P2	GAGGACACCCGGCTGGCATA	GCCGGGTGTCCTCCCCACAC
AP1S3	P1P2	AP1S3_-_224702252.23-P1P2	AP1S3_-_224702284.23-P1P2	GGCGAGCGCTGGAGCCGGTG	TGGTCTAAGCCGGGCGCCTC
AP2A1	P1P2	AP2A1_-_50270622.23-P1P2	AP2A1_+_50270300.23-P1P2	GTAGAGTGGGGGGCACGTAG	GGGGTCCTTTCCGCCCGGTC
AP2A2	P1P2	AP2A2_-_925877.23-P1P2	AP2A2_+_925897.23-P1P2	GCGCGCGGCGGCCCAGAAAG	TGGTTAGGCGGCTCCCCGGC
AP2B1	P1P2	AP2B1_-_33914544.23-P1P2	AP2B1_-_33914522.23-P1P2	GCTGGGTCGGAGACCGGCGG	GGTGTTACCCTTCTCTCCGC
AP2S1	P1P2	AP2S1_-_47354086.23-P1P2	AP2S1_-_47354062.23-P1P2	GACTGGGCAGCTCCGGCTCA	CGGGACCGGGGCCGCTGGGC
AP3B1	P1P2	AP3B1_-_77590427.23-P1P2	AP3B1_+_77590520.23-P1P2	GCGCGGTGCTGGCGGGTGCG	GACTCGTCACGGCTCCCTGC
AP3B2	P1P2	AP3B2_-_83378565.23-P1P2	AP3B2_+_83378423.23-P1P2	GTCCGGGCTGGCGAAGGCGG	TTGTCTTCGCTGTAGGCGGC
AP3D1	P1P2	AP3D1_-_2151147.23-P1P2	AP3D1_-_2151563.23-P1P2	GACTAAGACAGAGCCCGGGC	CCATCTTGTCCGCCATTTGC
AP3M1	P1P2	AP3M1_+_75910607.23-P1P2	AP3M1_+_75910525.23-P1P2	GTGTTAATCAGGCAATTTCC	GTCAGTGATTCGGCGCCGGC
AP3M2	P1P2	AP3M2_-_42010600.23-P1P2	AP3M2_-_42010635.23-P1P2	GTGTCCGCGCCTAGGAGCAG	TACTCCTCACCTGGCCTTGC
AP3S1	P1P2	AP3S1_+_115177971.23-P1P2	AP3S1_-_115177670.23-P1P2	GGACCGCGCGGCAGGGAGGT	CGTAATCTCGCCTGCGATCC
AP3S2	P1P2	AP3S2_+_90437190.23-P1P2	AP3S2_+_90437186.23-P1P2	GGCCGGTGCTGAGAGAACCG	GCCACGGTTCTCTCAGCACC
AP4B1	P1P2	AP4B1_-_114447335.23-P1P2	AP4B1_+_114447589.23-P1P2	GCGTCCTCGGAGCCAAGGTA	ACAGATCGCTCCCGCTACTC
AP4E1	P1P2	AP4E1_-_51200948.23-P1P2	AP4E1_-_51200945.23-P1P2	GGCGGCTACGGGATCGCGGG	GCGATCCCGTAGCCGCCCGC
AP4M1	P1P2	AP4M1_+_99699365.23-P1P2	AP4M1_+_99699307.23-P1P2	GTAGATGAGCGGGTCCCCCT	TCTTCTTGTCTACTCTCCAC
AP4S1	P1P2	AP4S1_+_31494875.23-P1P2	AP4S1_-_31495105.23-P1P2	GACGCGGTGCGGGCCTCCTC	CGTTGGGGTCGGTGTGCGGC
AP5B1	P1P2	AP5B1_+_65548161.23-P1P2	AP5B1_+_65548202.23-P1P2	GCGGCATCTGCGCGGCGTCT	ACGGTGAGACCAGGGCTCTC
AP5M1	P1P2	AP5M1_-_57735937.23-P1P2	AP5M1_-_57735787.23-P1P2	GCGGCGCAGGATGAGCCTCA	ATACCCTGCAACTCCGGTAC
AP5S1	P1P2	AP5S1_-_3801224.23-P1P2	AP5S1_+_3801197.23-P1P2	GTTGCTCTCCTGCCACGGAG	CCATTGCTCTCCTGCCACGC
AP5Z1	P1P2	AP5Z1_-_4815293.23-P1P2	AP5Z1_-_4815338.23-P1P2	GACCGGGGTGCGGAGCTCCT	CCACCAGACGCGCACGAACC
APAF1	P1P2	APAF1_-_99039085.23-P1P2	APAF1_+_99039058.23-P1P2	GTCCAGAGGCGGAGAAGAAG	CTGTCCAGAGGCGGAGAAGC
APBA1	P1P2	APBA1_+_72287177.23-P1P2	APBA1_+_72287235.23-P1P2	GCTGCGGCGGGAGAAGATGG	TCGCCCAGCTCCGGCTCCGC
APBA2	P1P2	APBA2_+_29131551.23-P1P2	APBA2_-_29131600.23-P1P2	GCAGCCACGCTGAGTCGGGA	CCATATCCCAGCGGCGGCCC
APBA3	P1P2	APBA3_+_3761594.23-P1P2	APBA3_+_3761583.23-P1P2	GCGCGGCCCGGGCTACGTCG	ACGGACGGCCCCGACGTAGC
APBB1	P1P2	APBB1_-_6440248.23-P1P2	APBB1_-_6440251.23-P1P2	GCCCCGGGCCCAGATGACGG	CCTCCGTCATCTGGGCCCGC
APBB1IP	P1P2	APBB1IP_+_26727301.23-P1P2	APBB1IP_+_26727562.23-P1P2	GTCGACGCAAGAGGGACTAA	ACTGTCTCTAACCAGGGGCC
APBB2	P1P2	APBB2_+_41216527.23-P1P2	APBB2_+_41216456.23-P1P2	GGCCCGTTCTGGTCTCAAGT	AGCGGCTCTGCTCCAGTCTC
APBB3	P1P2	APBB3_+_139943875.23-P1P2	APBB3_-_139943965.23-P1P2	GTAGCTCCAGAGGTCGCGCT	CGTATTTGTGCGGCGCCAGC
APC	P1	APC_-_112073585.23-P1	APC_-_112073620.23-P1	GCAGCCCGCCAGGGTGTCAC	TTTCCGAGTCCGGCAGCACC
APC	P2	APC_-_112043247.23-P2	APC_-_112043228.23-P2	GCGGAGGGCAAGTAGCAAGG	CCATCTTGTGGGAGGTGGGC
APC2	P1	APC2_-_1450147.23-P1	APC2_+_1450166.23-P1	GTCTCGCCCAGCGCTAGGAG	GGACCGGGCTTTGTCCGCCC
APC2	P2	APC2_-_1446291.23-P2	APC2_-_1446345.23-P2	GGGGCGGCCGCGGCTCCATG	TACCTGGTCCCCGAAGAAGC
APCDD1	P1P2	APCDD1_-_10454694.23-P1P2	APCDD1_+_10454664.23-P1P2	GCTCAGAGCGGCGCACGCGG	CTGCAGCTCAGAGCGGCGCC
APCDD1L	P1P2	APCDD1L_+_57090390.23-P1P2	APCDD1L_+_57090384.23-P1P2	GCGGCCTCATTTACAGACAG	CGGCCTCTGTCTGTAAATGC
APCS	P1P2	APCS_+_159557645.23-P1P2	APCS_+_159557663.23-P1P2	GAGGGTAGCAGACAACACAG	TCATCCTGGTCACTGCTTCC
APEH	P1P2	APEH_-_49711852.23-P1P2	APEH_+_49711858.23-P1P2	GACTATGGAACGTCAGGTGA	GCGGTCCCCGTGGTCCCTGC
APEX1	P1P2	APEX1_-_20923425.23-P1P2	APEX1_+_20923418.23-P1P2	GGAGGAGCTAGGCTGCCATC	TCGGGCCGGTGCAGATACGC
APEX2	P1P2	APEX2_+_55026814.23-P1P2	APEX2_+_55026846.23-P1P2	GTCCCAGCCCGCGCCAACCT	TTTAAGATGTTGCGCGTGGC
APH1A	P1P2	APH1A_-_150241316.23-P1P2	APH1A_-_150241347.23-P1P2	GGGCAACGCGACCCCACGAG	CGGGGTCTGGGGGTGACATC
APH1B	P1P2	APH1B_-_63569831.23-P1P2	APH1B_+_63569877.23-P1P2	GTCCGCGGTGGCCATGACTG	TTTATGTCTTCACCATCGCC
API5	P1P2	API5_-_43333619.23-P1P2	API5_-_43333590.23-P1P2	GGTTTGGAGAAGTTCCGAGG	CACTATTACACCTCCAGCTC
APIP	P1P2	APIP_-_34938012.23-P1P2	APIP_-_34937854.23-P1P2	GCGCCGGCTGAGATATCCAG	CGCGGGTCCCTGGTCTGGGC
APITD1	P1P2	APITD1_-_10490853.23-P1P2	APITD1_-_10490864.23-P1P2	GTGGGGAGGAAGCGGTTCTA	GCACGCTCCCCTAGAACCGC
APITD1-CORT	P1P2	APITD1-CORT_-_10490853.23-P1P2	APITD1-CORT_-_10490864.23-P1P2	GTGGGGAGGAAGCGGTTCTA	GCACGCTCCCCTAGAACCGC
APLF	P1P2	APLF_-_68694726.23-P1P2	APLF_+_68694742.23-P1P2	GGGCCGGGCTCTGAGAGGAC	TTGAGGCCCTCCCTCGGTGC
APLN	P1P2	APLN_+_128788911.23-P1P2	APLN_+_128788902.23-P1P2	GGAGCATTCTCTCTGGCAGC	GTGACCCCGGCTGCCAGAGC
APLNR	P1P2	APLNR_+_57004653.23-P1P2	APLNR_+_57004672.23-P1P2	GAGGAGACAGGCTTCCTCCA	GCAGAATTTCCTCCACCCTC
APLP1	P1P2	APLP1_-_36359530.23-P1P2	APLP1_-_36359489.23-P1P2	GAGGGGACGTGAGGGCGCAA	CAGCGGTGACAGGAGCTCCC
APLP2	P1P2	APLP2_-_129939875.23-P1P2	APLP2_-_129939865.23-P1P2	GAGAGCGACCCGGCGAGGGA	GGTCGCTCTAGCGCGCGGCC
APMAP	P1P2	APMAP_+_24973306.23-P1P2	APMAP_+_24973353.23-P1P2	GTACCATGAGCGAGGCGGAC	CCTCACACTGAGCGGCGCCC
APOA1	P1P2	APOA1_-_116708302.23-P1P2	APOA1_-_116708285.23-P1P2	GTGGGGAGCCAGAGTGACCG	CAGCTCAAGGTTCAGGCCTC
APOA1BP	P1P2	APOA1BP_-_156561604.23-P1P2	APOA1BP_-_156561782.23-P1P2	GCTCTGCGAGCTGGATGTCC	ACCTCAGGTACTTCACCACC
APOA2	P1P2	APOA2_+_161193373.23-P1P2	APOA2_+_161193370.23-P1P2	GACGCTGGCTAGGTAAGATA	CCTTATCTTACCTAGCCAGC
APOA4	P1P2	APOA4_+_116693985.23-P1P2	APOA4_+_116693941.23-P1P2	GGCGCAGGTGAGCTCTCCTG	CACTGGATCCTCCCTACAAC
APOA5	P1P2	APOA5_+_116662572.23-P1P2	APOA5_+_116662545.23-P1P2	GGTCTTCTCAGAGCAGGTAA	AGGTGAGCACGGCAGCCATC
APOB	P1P2	APOB_-_21266915.23-P1P2	APOB_-_21266941.23-P1P2	GCAGCGGCAGCAACCGAGAA	ACCGGGACCTGCGGGGCTGC
APOBEC1	P1P2	APOBEC1_+_7818434.23-P1P2	APOBEC1_+_7818491.23-P1P2	GAAAGGTAAAATGGATCCGG	CTGGAGTCATAAGTTGTGCC
APOBEC2	P1P2	APOBEC2_-_41021362.23-P1P2	APOBEC2_-_41021104.23-P1P2	GGCACCAGTGGGCCCGGCAG	CTTCCTTCTGGGCCATGGAC
APOBEC3A	P1P2	APOBEC3A_-_39353663.23-P1P2	APOBEC3A_-_39353687.23-P1P2	GAGCAAGTCGCAAGAGCGGG	TTCTCGGTTCCTGGTCTGTC
APOBEC3A_B	P1P2	APOBEC3A_B_-_39353663.23-P1P2	APOBEC3A_B_-_39353687.23-P1P2	GAGCAAGTCGCAAGAGCGGG	TTCTCGGTTCCTGGTCTGTC
APOBEC3B	P1P2	APOBEC3B_+_39378603.23-P1P2	APOBEC3B_-_39378432.23-P1P2	GAGCCTGACTGGGATTCGTG	GTCCCGCTCTTTTTTTGAAC
APOBEC3C	P1P2	APOBEC3C_-_39410336.23-P1P2	APOBEC3C_-_39410342.23-P1P2	GCAGCGCTTCAGAAAAGAGT	TGTCCCACTCTTTTCTGAAC
APOBEC3D	P1P2	APOBEC3D_-_39410336.23-P1P2	APOBEC3D_-_39410342.23-P1P2	GCAGCGCTTCAGAAAAGAGT	TGTCCCACTCTTTTCTGAAC
APOBEC3F	P1P2	APOBEC3F_-_39436896.23-P1P2	APOBEC3F_+_39437128.23-P1P2	GGGAGGGCTGTCCTGAAACC	GGCTCTTTTTCCTGCTCTGC
APOBEC3G	P1P2	APOBEC3G_+_39473517.23-P1P2	APOBEC3G_+_39473587.23-P1P2	GAGGAGCCTGGCTGGGAGTA	CATCTGTCCCAGCCCAGGTC
APOBEC3H	P1P2	APOBEC3H_-_39493307.23-P1P2	APOBEC3H_+_39493488.23-P1P2	GTAGTGCCTCAGACAAGCAG	ACCCAGGCTCTTTGCCCTGC
APOBEC4	P1P2	APOBEC4_+_183622414.23-P1P2	APOBEC4_-_183622430.23-P1P2	GGGTAGCCACACCTCAGCAA	CACCTCAGCAAGGGCTTTCC
APOBR	P1	APOBR_+_28506010.23-P1	APOBR_+_28506013.23-P1	GCCCAGGGAGGTATAGCCGG	GCTATACCTCCCTGGGCTGC
APOBR	P2	APOBR_-_28508486.23-P2	APOBR_-_28508435.23-P2	GGAGCTGGACGGAAGCACAG	CAGTTCCACATCCCGCGTCC
APOC1	P1P2	APOC1_-_45417829.23-P1P2	APOC1_-_45417876.23-P1P2	GCCCAACGCTCACGGGACAG	CTGACCGCCTGCCTCCCTCC
APOC2	P1P2	APOC2_-_45449332.23-P1P2	APOC2_-_45449342.23-P1P2	GAGGACAGCCTGCCAGAGTC	TTTCTTACCAGACTCTGGCC
APOC3	P1P2	APOC3_-_116700671.23-P1P2	APOC3_+_116700652.23-P1P2	GCTCCAGGTAATGCCCTCTG	GGTAATGCCCTCTGGGGAGC
APOC4	P1P2	APOC4_+_45445578.23-P1P2	APOC4_+_45445542.23-P1P2	GGGCCAGGACCAGCACGCAG	CAGAAACAGGCTCCAGGCCC
APOD	P1P2	APOD_+_195310790.23-P1P2	APOD_-_195310422.23-P1P2	GCAAGACAGGCATCTCAAAT	AGGTGAATTCTCAGCAAGCC
APOE	P1P2	APOE_-_45409117.23-P1P2	APOE_-_45409137.23-P1P2	GCGGTGAGAAGCGCAGTCGG	CTGAGCTCATCCCCGTGCCC
APOF	P1P2	APOF_+_56756580.23-P1P2	APOF_+_56756544.23-P1P2	GCCTCATGGGACACAGAACT	TGGTAGGTTTGATCGCTTCC
APOH	P1	APOH_-_64225487.23-P1	APOH_-_64225515.23-P1	GTCGAGAACAAGATGAGCAC	GTGTGACTCATCCACAATGC
APOH	P2	APOH_+_64224198.23-P2	APOH_-_64224106.23-P2	GGGGCTATGTGTCCCGAGGA	TCATTTGGATTCTGGGTATC
APOL1	P1P2	APOL1_-_36649201.23-P1P2	APOL1_-_36649205.23-P1P2	GTATACAGACGCATAACTGG	ACCTCCAGTTATGCGTCTGC
APOL2	P1P2	APOL2_+_36635546.23-P1P2	APOL2_-_36635610.23-P1P2	GACAGATGCACAGCTGGACG	GGGTATATCTGGGAGGCCGC
APOL3	P1P2	APOL3_+_36556775.23-P1P2	APOL3_-_36556720.23-P1P2	GCAGATGCACGGCTGGAGGT	TGGTAAGTTAGGGGTGGTCC
APOL4	P1P2	APOL4_-_36597822.23-P1P2	APOL4_-_36597841.23-P1P2	GTGGCTCAGACGCTGATCTG	CAACATTCAGCAGAGGCCCC
APOL5	ENST00000249044.2	APOL5_-_36113963.23-ENST00000249044.2	APOL5_+_36113958.23-ENST00000249044.2	GTTGCAAGTTCCCGGTTCCA	AGGTGTTACCTGGTAAGTTC
APOL6	P1P2	APOL6_-_36044592.23-P1P2	APOL6_+_36044574.23-P1P2	GCTGCCAGACCAGGGGACCT	GACCAGGGGACCTCGGAGAC
APOLD1	P1P2	APOLD1_-_12938628.23-P1P2	APOLD1_+_12938640.23-P1P2	GGGAGGCAGACAGAAGTGAA	TGAGGCATATATTCGGGATC
APOM	P1P2	APOM_+_31620267.23-P1P2	APOM_-_31620263.23-P1P2	GGTAAAGCTTGGGGACCTGG	GAAGTATCGCTTCGAGATCC
APOO	P1P2	APOO_+_23925598.23-P1P2	APOO_-_23925881.23-P1P2	GAGGCGGGAGACCCCCGGGT	CTCTATAGTGGGCGTGGCCC
APOOL	P1P2	APOOL_+_84259102.23-P1P2	APOOL_-_84258921.23-P1P2	GGGCTGATAAAACCCTAATG	TGTCTACAACCCTTTCGGCC
APOPT1	P1P2	APOPT1_-_104029328.23-P1P2	APOPT1_+_104029375.23-P1P2	GGTGCGCCGCGGGAGCCAGG	CTCTCTGCCGCGCCTTCGCC
APP	P1P2	APP_+_27543048.23-P1P2	APP_+_27543051.23-P1P2	GGGTAGGCGAGAGCACGCGG	CGTGCTCTCGCCTACCGCTC
APPBP2	P1P2	APPBP2_-_58603391.23-P1P2	APPBP2_+_58603361.23-P1P2	GGGCCCCGGAGGATTCGGAG	CTCTGCGGCCCCGGAGGATC
APPL1	P1P2	APPL1_+_57261807.23-P1P2	APPL1_-_57261822.23-P1P2	GGGCCCGCCCTCTCCGGCAA	TCTCCGGCAAGGGCTGCAGC
APPL2	P1P2	APPL2_+_105629891.23-P1P2	APPL2_-_105629866.23-P1P2	GGGCCGCCGCGGGCACGGAG	GGGAGTGCTCTCGGCCGCCC
APRT	P1P2	APRT_-_88878107.23-P1P2	APRT_-_88878308.23-P1P2	GTGACGCCGGGGCCGAAGGA	TGGCCGACTCCGAGCTGCAC
APTX	P1	APTX_-_33001547.23-P1	APTX_-_33001417.23-P1	GCCCAGCCAGCAGAAGAGAT	CTGTTACTACCTTGGGCTGC
APTX	P2	APTX_+_33025069.23-P2	APTX_-_33025057.23-P2	GCGGCGCTCGTGGAATCTTC	CTCAGCGAGCCTGAGAGTGC
AQP1	ENST00000509504.1	AQP1_+_30893087.23-ENST00000509504.1	AQP1_+_30893268.23-ENST00000509504.1	GCGCACATCCCACAGGAGTA	TTGCATCCTCAAGAGCTGGC
AQP10	P1P2	AQP10_-_154293619.23-P1P2	AQP10_+_154293791.23-P1P2	GGGGAGCAGTGAATAGCAAT	TCTGTTGTCCTTATCTCTTC
AQP11	P1P2	AQP11_-_77301026.23-P1P2	AQP11_-_77301023.23-P1P2	GAGCCCGCAACCCGCTCAGG	GAGCGGGTTGCGGGCTCCGC
AQP12A	P1P2	AQP12A_+_241631475.23-P1P2	AQP12A_-_241631463.23-P1P2	GTCCTCATCTCCAGGCAGCA	GCACCCACCGCCTCCCGGGC
AQP12B	P1P2	AQP12B_+_241622264.23-P1P2	AQP12B_+_241621938.23-P1P2	GTGCAGGCACAGCATCTCGG	CGGCCATGAGGAACTCCTGC
AQP2	P1P2	AQP2_+_50344559.23-P1P2	AQP2_+_50344821.23-P1P2	GCTCAGGGCCAGGATGCTCC	TGACTGTGGCCTGCCTGGTC
AQP3	P1	AQP3_-_33447534.23-P1	AQP3_-_33447595.23-P1	GCTTCTGTCGACCCATGGCG	CTGCTCGCTGCGCCACCGCC
AQP3	P2	AQP3_+_33443041.23-P2	AQP3_-_33443001.23-P2	GCCATAACTCATGGGAGGGT	CCGACTCACTGTGTGTCTAC
AQP4	P1P2	AQP4_+_24445664.23-P1P2	AQP4_+_24445620.23-P1P2	GGGCAATGAGAGCTGCACTC	CCACCGCCTTGCTGTGGGTC
AQP5	P1P2	AQP5_+_50355917.23-P1P2	AQP5_-_50355675.23-P1P2	GGCGCGATCTGCAGGATGGT	ACTCCGAGGCTGGCGGCCTC
AQP6	P1P2	AQP6_+_50366744.23-P1P2	AQP6_-_50366959.23-P1P2	GTGGCAGGGCGCAGGCGGAT	TGTCCTGGTGCCTTGGCCGC
AQP7	P1P2	AQP7_+_33402012.23-P1P2	AQP7_+_33402004.23-P1P2	GGGCAGTGGACCACAGCGGG	GCACGCCTCCCGCTGTGGTC
AQP8	P1P2	AQP8_+_25228481.23-P1P2	AQP8_+_25228499.23-P1P2	GAGGGACAGAGGACACGGGT	TTTTTCCCTACGGCAGATAC
AQP9	P1P2	AQP9_-_58430619.23-P1P2	AQP9_-_58430777.23-P1P2	GCCACAGCCTCTAATTGGAA	TCAGGCTGCATCTTGGGGCC
AQPEP	P1P2	AQPEP_-_115298201.23-P1P2	AQPEP_-_115298249.23-P1P2	GAGGCTCTTCCAGGAGGAAG	GGGTGTTCAGTGCTGCGACC
AR	P1P2	AR_+_66763866.23-P1P2	AR_-_66763917.23-P1P2	GCTCCCCGGGATCTCGGAGG	GACCGTCCCGCTCTCCCAGC
ARAF	P1P2	ARAF_-_47420655.23-P1P2	ARAF_-_47420581.23-P1P2	GTGTAGCGGCGTGACAGGTG	CCGTCGCCTCTCGGACTCTC
ARAP1	P1	ARAP1_+_72433345.23-P1	ARAP1_+_72433314.23-P1	GTGTTGGCCACGGCTGCAGG	GGAGGCTTCCTGCTTTGTGC
ARAP1	P2	ARAP1_+_72463419.23-P2	ARAP1_+_72463416.23-P2	GCGGTGGCGGTGTAAGTCGG	CCACCGACTTACACCGCCAC
ARAP2	P1P2	ARAP2_-_36245906.23-P1P2	ARAP2_-_36246014.23-P1P2	GTCGGTCCTCGCCCCTCTGC	CGACACGCCGGCCCCACTAC
ARAP3	P1P2	ARAP3_+_141061783.23-P1P2	ARAP3_+_141061751.23-P1P2	GGCGGCGGGACCCAGAACCT	CCGTCCGCTCGCGGGTGCCC
ARC	P1P2	ARC_+_143695828.23-P1P2	ARC_-_143695803.23-P1P2	GAGGACTCAGCGCAGAGCTC	AGCCGGACCTGCCTCCCCGC
AREG	P1P2	AREG_+_75311479.23-P1P2	AREG_-_75311544.23-P1P2	GTAGACAGAGATGGAGAATT	GGATACTCTAAGTCCCTCTC
AREL1	P1P2	AREL1_-_75179713.23-P1P2	AREL1_+_75179717.23-P1P2	GGCAGCACTCAGCAGAAGAC	ACTCTCCCACCAACAGACCC
ARF1	P1P2	ARF1_+_228270829.23-P1P2	ARF1_-_228270444.23-P1P2	GCGGCCTCGGGAAACGAGAA	GGCGTTGGTTTTGCTCCCAC
ARF3	P1P2	ARF3_+_49351226.23-P1P2	ARF3_+_49351049.23-P1P2	GGGCTTCCGGTGCTAGGTGG	CTTCTCTACCGGGACCCGCC
ARF4	P1P2	ARF4_-_57583033.23-P1P2	ARF4_+_57583046.23-P1P2	GCCCTGTGCCGATGAAGATC	GTAGAGGACCTGCTAGGCGC
ARF5	P1	ARF5_-_127228493.23-P1	ARF5_-_127228524.23-P1	GGCTGCGCCCCATCCCCCCG	ACGCGGGGTGCGGGCTGGAC
ARF5	P2	ARF5_-_127229626.23-P2	ARF5_-_127229665.23-P2	GCAAGATTCGGCCTCTGTGG	CTCCCAACACTCCACCTGAC
ARF6	P1	ARF6_-_50359827.23-P1	ARF6_-_50359824.23-P1	GCGGCGGCGGCAGAACTGGG	AGTTCTGCCGCCGCCGCTGC
ARF6	P2	ARF6_+_50361360.23-P2	ARF6_+_50361377.23-P2	GAAAGGAAAAAAGCATACAT	TTTTTGCCCAGTTTCCTTAC
ARFGAP1	P1P2	ARFGAP1_+_61904219.23-P1P2	ARFGAP1_-_61904178.23-P1P2	GTCAGGCCAGGGCCGAGGTA	CCACCAGCTTCCGGCTACGC
ARFGAP2	P1P2	ARFGAP2_+_47198411.23-P1P2	ARFGAP2_+_47198415.23-P1P2	GGCCGCGGTTGTGTCTGGGA	AGACACAACCGCGGCTGACC
ARFGAP3	P1P2	ARFGAP3_-_43253140.23-P1P2	ARFGAP3_-_43253228.23-P1P2	GCTTGTTAGTGGGCACCGAG	GTTGGCTGGGCCAGCTGCGC
ARFGEF1	P1P2	ARFGEF1_+_68255970.23-P1P2	ARFGEF1_+_68255550.23-P1P2	GGGCAGGTCGGCGGTGATGG	ACCCGCGGCTCCCAGCGGCC
ARFGEF2	P1P2	ARFGEF2_+_47538281.23-P1P2	ARFGEF2_-_47538312.23-P1P2	GAAGCGACACCTCGGCCCCA	CGTCAGGAAGCGACACCTCC
ARFIP1	P1P2	ARFIP1_+_153701170.23-P1P2	ARFIP1_-_153701186.23-P1P2	GACCAACCGCCGAGGACAGT	CCGAGGACAGTCGGACCGGC
ARFIP2	P1P2	ARFIP2_+_6502528.23-P1P2	ARFIP2_+_6502522.23-P1P2	GCTGCTGCTAGGATCGCGAC	GTTCCCGTCGCGATCCTAGC
ARFRP1	P1P2	ARFRP1_-_62338974.23-P1P2	ARFRP1_+_62339198.23-P1P2	GCCTGGGGGGAGCGGACTAC	CACAGCCTGCGGCCTACCTC
ARG1	P1P2	ARG1_-_131894387.23-P1P2	ARG1_+_131894441.23-P1P2	GTCACTGAGGGTTGACTGAC	TAGGGATTATTGGAGCTCCC
ARG2	P1P2	ARG2_+_68086667.23-P1P2	ARG2_-_68086620.23-P1P2	GGCAGCACTGAGAATCTCCA	CTGCTCTTACCTACCCGCGC
ARGFX	P1P2	ARGFX_-_121286824.23-P1P2	ARGFX_-_121286860.23-P1P2	GAGAGAGAGACACACCACGT	GTCACGAATCCCCTTAGAGC
ARGLU1	P1P2	ARGLU1_-_107220477.23-P1P2	ARGLU1_+_107220466.23-P1P2	GGCGCCAGGCGCCCCTAAGA	CTAAGATGGCAGCTGCGGCC
ARHGAP1	P1P2	ARHGAP1_+_46722124.23-P1P2	ARHGAP1_+_46722099.23-P1P2	GTGCCGAGCCTTGACAGGCG	CGCTCGGGCACTGCTCCCTC
ARHGAP10	P1P2	ARHGAP10_-_148653268.23-P1P2	ARHGAP10_+_148653282.23-P1P2	GCAGCTAGCGCTGGTCTCGG	CAGGACTCGGCTCTACGGGC
ARHGAP11A	P1P2	ARHGAP11A_-_32908159.23-P1P2	ARHGAP11A_-_32907745.23-P1P2	GGGGTGACCAGAAAGAAGGT	AGCTCCTCCGCAGACACCCC
ARHGAP11B	P1P2	ARHGAP11B_-_30918647.23-P1P2	ARHGAP11B_-_30918642.23-P1P2	GCCAGACGGACAGTAAGGTT	TACTGTCCGTCTGGTTCGCC
ARHGAP12	P1P2	ARHGAP12_+_32217575.23-P1P2	ARHGAP12_-_32217708.23-P1P2	GCGCGGGTCCTGGCGGACGG	TAGCCGTGTGAACGCTCTTC
ARHGAP15	P1P2	ARHGAP15_-_143887002.23-P1P2	ARHGAP15_-_143887035.23-P1P2	GATTAACAGTTAGGAGTTGA	TTTCTCGGCAATGACCTGTC
ARHGAP17	P1P2	ARHGAP17_-_25026675.23-P1P2	ARHGAP17_+_25026532.23-P1P2	GCGCTTCCCGGCCCAAACGG	ACGGTCTGGTTAGCCAGCTC
ARHGAP18	P1P2	ARHGAP18_-_130031326.23-P1P2	ARHGAP18_-_130031261.23-P1P2	GGCGATCCTGACACAGAGAA	AGGGAGTGGTACTAACAGCC
ARHGAP19	P1P2	ARHGAP19_+_99052371.23-P1P2	ARHGAP19_-_99052346.23-P1P2	GCTGACGAAGATGGCGACTG	GCGAATCCGGCCGGAGGTGC
ARHGAP20	P1P2	ARHGAP20_+_110583103.23-P1P2	ARHGAP20_+_110583100.23-P1P2	GGGAGGTACATGGCCCCGAC	CCCGTCGGGGCCATGTACCC
ARHGAP21	P1P2	ARHGAP21_+_25012355.23-P1P2	ARHGAP21_+_25012738.23-P1P2	GGCGCTGGCTCGGGGCCGGA	CCGGACTCTCCCCTCGCCTC
ARHGAP22	P1P2	ARHGAP22_-_49813131.23-P1P2	ARHGAP22_+_49813140.23-P1P2	GCAATCACTGGACCAGGGCG	CCTGGCCTGGGCGCACGCGC
ARHGAP23	P1P2	ARHGAP23_+_36584749.23-P1P2	ARHGAP23_+_36584742.23-P1P2	GGCGGGGCGGGATCCCGACC	TCTGCCTGGTCGGGATCCCC
ARHGAP24	P1P2	ARHGAP24_-_86396380.23-P1P2	ARHGAP24_-_86396392.23-P1P2	GAACACAGCCCAGCTCCGGG	TGCTGGTTTCCACCCGGAGC
ARHGAP25	P1P2	ARHGAP25_-_68962176.23-P1P2	ARHGAP25_+_68962004.23-P1P2	GGAGAAAGGAGGAGACACGT	ATGACGCAGAGGGAAGTGTC
ARHGAP26	P1P2	ARHGAP26_-_142150021.23-P1P2	ARHGAP26_-_142150018.23-P1P2	GGCTAGCGAAGGAGGCGGGG	CGCCTCCTTCGCTAGCTAGC
ARHGAP27	P1	ARHGAP27_-_43487747.23-P1	ARHGAP27_-_43487732.23-P1	GGTGCTGGCACAGGGCAACA	GCACTGGGGTAGTGCCCCTC
ARHGAP27	P2	ARHGAP27_+_43502986.23-P2	ARHGAP27_+_43503003.23-P2	GGGAGGCGCCGCACATGAGC	CCGGGGCTGCTTGTATAAGC
ARHGAP28	P1P2	ARHGAP28_+_6729759.23-P1P2	ARHGAP28_+_6729774.23-P1P2	GGACCGGGACCAGCATGGAC	GGTCTTTGTTCTGGGGCCGC
ARHGAP29	P1P2	ARHGAP29_+_94703085.23-P1P2	ARHGAP29_+_94702836.23-P1P2	GTGCGGCTGCGGCTGAGATT	CCGCTTCCACTCGGGGCCGC
ARHGAP30	P1P2	ARHGAP30_+_161039652.23-P1P2	ARHGAP30_-_161039638.23-P1P2	GAGGCTGGGCCACGAGACAC	GGGTCCTGGTAGCTTCCTCC
ARHGAP31	P1P2	ARHGAP31_+_119013334.23-P1P2	ARHGAP31_-_119013294.23-P1P2	GCGGGGCGAGGAGACTGCCC	TCAGACGACTTTGGTAGAGC
ARHGAP32	ENST00000310343.9	ARHGAP32_+_129062200.23-ENST00000310343.9	ARHGAP32_-_129062212.23-ENST00000310343.9	GGCACCAGTACCTGTCACTA	GTCACTAGGGCACCAGACAC
ARHGAP33	P1P2	ARHGAP33_+_36266681.23-P1P2	ARHGAP33_+_36266470.23-P1P2	GCGCAGGACGGGAGGGACCA	CTTTGTGTCGCCATGGCGGC
ARHGAP35	ENST00000404338.3	ARHGAP35_-_47421941.23-ENST00000404338.3	ARHGAP35_-_47422000.23-ENST00000404338.3	GGATGTGTCGACGATGATGA	AGATAATCCCACCACACTGC
ARHGAP36	P1P2	ARHGAP36_+_130192380.23-P1P2	ARHGAP36_-_130192288.23-P1P2	GCTCAAAGGCCGAGGCGAAA	CCGGTGACCACGCCCTGAGC
ARHGAP39	P1P2	ARHGAP39_+_145911186.23-P1P2	ARHGAP39_+_145911217.23-P1P2	GCGGAGGACGCCGACAGCAC	GCCCAGTGCGCGGCGGCCGC
ARHGAP4	P1	ARHGAP4_-_153200217.23-P1	ARHGAP4_-_153200438.23-P1	GGCCAGCCCCATAGGTCCAG	TCCCGGCGTCGCTTCGGAGC
ARHGAP40	P1P2	ARHGAP40_-_37230545.23-P1P2	ARHGAP40_+_37230557.23-P1P2	GGATCGAGTCAGCCCCACGG	ACCGGGATCCTCGAGGTGCC
ARHGAP42	P1P2	ARHGAP42_+_100558059.23-P1P2	ARHGAP42_-_100558046.23-P1P2	GCACGGCGCGCAGACACTTC	ACTCTCTTGACAGTCGTCGC
ARHGAP44	P1P2	ARHGAP44_-_12693204.23-P1P2	ARHGAP44_-_12692860.23-P1P2	GAGCTGGCCAACCAGACGGT	GTCCCAGTCCGGCGCGGGGC
ARHGAP5	P1P2	ARHGAP5_+_32546214.23-P1P2	ARHGAP5_-_32546259.23-P1P2	GCAGCCACACACCCGACCGG	CAGCATCTCTCCCGGCGCGC
ARHGAP6	P1P2	ARHGAP6_+_11445607.23-P1P2	ARHGAP6_+_11445878.23-P1P2	GCACTGGGCCGCTCCGGGTG	CTGCGGAGCCGGTGGGGACC
ARHGAP8	P1	ARHGAP8_-_45098408.23-P1	ARHGAP8_+_45098588.23-P1	GTCGCCCAGCCTCAGTGACC	AAGGCGGCGCGGCGCTTCAC
ARHGAP8	P2	ARHGAP8_-_45148512.23-P2	ARHGAP8_-_45148515.23-P2	GCGGGGTCCGTGGCCAGGTA	CCTTACCTGGCCACGGACCC
ARHGAP9	P1P2	ARHGAP9_-_57871601.23-P1P2	ARHGAP9_-_57871616.23-P1P2	GCTGAGGTGACCCAGGGTAC	GAGGTTTCTCCCCCAGTACC
ARHGDIA	P1P2	ARHGDIA_-_79829179.23-P1P2	ARHGDIA_+_79829172.23-P1P2	GGCCACGGCCACTCACCGGA	GAGGGTTCGGCCGCGCGGTC
ARHGDIB	P1P2	ARHGDIB_+_15114500.23-P1P2	ARHGDIB_+_15114492.23-P1P2	GAGTCAGAGTTGAGAGACAG	GGGTGCCTCTGTCTCTCAAC
ARHGDIG	P1P2	ARHGDIG_-_330602.23-P1P2	ARHGDIG_-_330659.23-P1P2	GGCTCACCGCAGTCGCGCCG	CGGAGCCGCCGAGGAGCCGC
ARHGEF1	P1	ARHGEF1_-_42387296.23-P1	ARHGEF1_-_42387322.23-P1	GAAGCGGGAGCCGGGACCCA	AGGTCGGGCTCGGCGATCCC
ARHGEF1	P2	ARHGEF1_-_42388477.23-P2	ARHGEF1_-_42388487.23-P2	GGGCGGCTAGAGCGACGCGG	ACCCCTGCCGCCGCGTCGCC
ARHGEF10	P1P2	ARHGEF10_-_1772144.23-P1P2	ARHGEF10_+_1772299.23-P1P2	GGCGCGATCCGGGACGGACG	TGGGTCCCCTCGCGGGCTTC
ARHGEF10L	P1P2	ARHGEF10L_-_17866424.23-P1P2	ARHGEF10L_+_17866293.23-P1P2	GTGAGCGGCGCGGACGACAA	TTGGCTCGGGTGGCGGCGGC
ARHGEF11	P1P2	ARHGEF11_-_157015113.23-P1P2	ARHGEF11_-_157015491.23-P1P2	GGTTGGGCTCCTCCACATCC	TCCCTGTGCGCCGAGCCTGC
ARHGEF12	P1P2	ARHGEF12_+_120207088.23-P1P2	ARHGEF12_+_120207116.23-P1P2	GCGGGCGCGCGCGCAGACAG	CCAGAACCCGGCGAGCCGGC
ARHGEF15	P1P2	ARHGEF15_+_8213591.23-P1P2	ARHGEF15_+_8214130.23-P1P2	GCCTTGGAGCGAGGAATGCA	CTACTCACTCAGCCCTGGGC
ARHGEF16	P1P2	ARHGEF16_-_3371005.23-P1P2	ARHGEF16_-_3371252.23-P1P2	GGGAGGGAAGGCGCAGGCAC	CCGCTTCCTGCGCGGTCTGC
ARHGEF17	P1P2	ARHGEF17_-_73019356.23-P1P2	ARHGEF17_-_73019377.23-P1P2	GGCGAGCAGCCAAGGGCGTT	CGACTCTGCGTCCGCCTGCC
ARHGEF18	P1P2	ARHGEF18_-_7460074.23-P1P2	ARHGEF18_-_7460077.23-P1P2	GGGCCGGACGGAGGCATCGG	CCTCCGATGCCTCCGTCCGC
ARHGEF19	P1P2	ARHGEF19_+_16533491.23-P1P2	ARHGEF19_+_16533485.23-P1P2	GAGGATATCCCCGACGTACG	CTGCCGCGTACGTCGGGGAC
ARHGEF2	P1P2	ARHGEF2_-_155948223.23-P1P2	ARHGEF2_-_155948140.23-P1P2	GATTCGATCCGAGACATAAT	TCTCCTTTCGCCGCGGTCCC
ARHGEF25	P1P2	ARHGEF25_+_58005227.23-P1P2	ARHGEF25_-_58005266.23-P1P2	GTGTGCGGGTCCCAGCGGAG	CCGAGCCACTGGCGCTGTGC
ARHGEF26	P1P2	ARHGEF26_+_153839215.23-P1P2	ARHGEF26_-_153839264.23-P1P2	GAGCGCAGCCGCGAGAGCTT	GTGGGTGGCCCGGGTCCGGC
ARHGEF28	P1P2	ARHGEF28_-_72922052.23-P1P2	ARHGEF28_+_72922024.23-P1P2	GGAGCCTTCCGGACTCCGGG	GGGAGAGCCTTCCGGACTCC
ARHGEF3	P1P2	ARHGEF3_-_56835979.23-P1P2	ARHGEF3_-_56835924.23-P1P2	GAGCCGGGCAGGACTCGACT	CCCGGCATCGTGGAGCTGGC
ARHGEF33	ENST00000398800.4	ARHGEF33_-_39146583.23-ENST00000398800.4	ARHGEF33_-_39146566.23-ENST00000398800.4	GGCTGGAGAAGAGAAGTAAC	GCTTATTCTTCAACATTGCC
ARHGEF35	ENST00000378115.2	ARHGEF35_+_143892694.23-ENST00000378115.2	ARHGEF35_-_143892637.23-ENST00000378115.2	GTGCGCTGGGGACGGCTCTG	ACCAGGTGGGTGCCCTCCTC
ARHGEF35	ENST00000543357.1	ARHGEF35_+_143991205.23-ENST00000543357.1	ARHGEF35_-_143991217.23-ENST00000543357.1	GCATGTGACACCGACCAGGT	ACCAGGTGGGTGCCCTCCTC
ARHGEF37	P1	ARHGEF37_-_148961080.23-P1	ARHGEF37_-_148961062.23-P1	GTGGGCACAGCCACCCGGAG	ACCGAGGGCGCTGGCGGGCC
ARHGEF37	P2	ARHGEF37_+_148931230.23-P2	ARHGEF37_-_148931256.23-P2	GCAGAGACCCGGCGGGTCCG	TCCAGAGACCCGGCGGGTCC
ARHGEF38	P1P2	ARHGEF38_+_106473860.23-P1P2	ARHGEF38_-_106473807.23-P1P2	GTGATTGCTAAGGTGCCTCA	CTTCACTCCAGGGTTACCTC
ARHGEF39	P1P2	ARHGEF39_-_35665151.23-P1P2	ARHGEF39_-_35665155.23-P1P2	GCACCGGGCACCGCGAACCG	GCCCCGGTTCGCGGTGCCCC
ARHGEF4	P1P2	ARHGEF4_-_131792637.23-P1P2	ARHGEF4_-_131792624.23-P1P2	GCCTGTGCGGCGGGATCTCG	CACAGGGCCGAGCCGGTGGC
ARHGEF40	P1P2	ARHGEF40_-_21538483.23-P1P2	ARHGEF40_-_21538491.23-P1P2	GAGACCCGGCGAGACACGAG	TCCCGCCGCTCGTGTCTCGC
ARHGEF5	P1P2	ARHGEF5_-_144052529.23-P1P2	ARHGEF5_+_144052450.23-P1P2	GTGCGCTGGGGACGGCTCTG	ATCCCTCCCTCCCGTCGGGC
ARHGEF6	P1P2	ARHGEF6_-_135863048.23-P1P2	ARHGEF6_+_135863011.23-P1P2	GTCTTCTGGATTCATTACTG	TGTCACGATTTGTTCTTCTC
ARHGEF7	ENST00000370623.3	ARHGEF7_-_111767696.23-ENST00000370623.3	ARHGEF7_+_111767892.23-ENST00000370623.3	GCTGAGAAGGCGCCTGACAG	TTACGTGGCTCATCACTCTC
ARHGEF9	P1P2	ARHGEF9_+_62974948.23-P1P2	ARHGEF9_+_62974965.23-P1P2	GCAGGGATCGAACGAGTGTC	TGCCTTGCTGGCCCTATCCC
ARID1A	P1P2	ARID1A_+_27022576.23-P1P2	ARID1A_-_27022530.23-P1P2	GCCCTTGCCTGGGAATGAGG	CTTTCTGCTGCCGGAGAAAC
ARID1B	P1	ARID1B_+_157098803.23-P1	ARID1B_-_157099145.23-P1	GCGCGCGGCCATGATCGCCG	TCCTTGAGAGCCGCCTCGGC
ARID1B	P2	ARID1B_+_157100315.23-P2	ARID1B_-_157100366.23-P2	GGAGGTGAGCAGCTGATTGA	CCGTAGCTCCGCATCATGGC
ARID2	P1P2	ARID2_-_46123742.23-P1P2	ARID2_-_46123531.23-P1P2	GAACCGGGGGGGCAGCGCCG	ATTCCTCGGCCGGCGGCGGC
ARID3A	P1P2	ARID3A_+_926082.23-P1P2	ARID3A_-_926022.23-P1P2	GGCTCCCGGCCCCCGACCCA	GATTGGTAAGAGGCGCCCCC
ARID3B	P1P2	ARID3B_-_74833936.23-P1P2	ARID3B_+_74833663.23-P1P2	GGTGGGCGCGCAGATAGGTG	CACAGGTAAGTGGCCCGGGC
ARID3C	P1P2	ARID3C_-_34628471.23-P1P2	ARID3C_-_34628531.23-P1P2	GGAGGGACCAAGATGGAGAG	AATATTCTATCTCTCTCCAC
ARID4A	P1P2	ARID4A_-_58765292.23-P1P2	ARID4A_+_58765344.23-P1P2	GGGATTGTGGCAGTAAATCG	GGACGGGGGCCCACGGAGGC
ARID4B	P1P2	ARID4B_+_235491464.23-P1P2	ARID4B_+_235491445.23-P1P2	GGTCAGTCGAGTCCGGAGTG	CTTCGGCGACCGAGCTCCTC
ARID5A	P1P2	ARID5A_-_97202536.23-P1P2	ARID5A_+_97202543.23-P1P2	GCCGCGCGCTGAGGGTCTCG	CGGGACCTCTCCGGGCCATC
ARID5B	ENST00000279873.7	ARID5B_-_63660959.23-ENST00000279873.7	ARID5B_+_63661162.23-ENST00000279873.7	GAGAAAGAGGAGCAGCGCCC	TGATCCATCCTCTTCCCGCC
ARIH1	P1P2	ARIH1_-_72766733.23-P1P2	ARIH1_-_72766755.23-P1P2	GTTTCTCTCGGAGGCCGGAG	GCCTCAGTCAGACGCGGCTC
ARIH2	P1P2	ARIH2_+_48956345.23-P1P2	ARIH2_-_48956298.23-P1P2	GGGACCGGATTGGGGCGAAG	GAAGAGTCGTCCCCACAGCC
ARIH2OS	P1P2	ARIH2OS_+_48956620.23-P1P2	ARIH2OS_-_48956929.23-P1P2	GAAGGCGGCGGGAGGAAAAA	AACCAGCTTCTGGCGAGGCC
ARL1	P1P2	ARL1_+_101801468.23-P1P2	ARL1_-_101801545.23-P1P2	GGCCTCGGAGCTGCAGCCGA	CCGCCTGGAGTCCGACGTGC
ARL10	P1P2	ARL10_+_175792529.23-P1P2	ARL10_-_175792511.23-P1P2	GACGCAGGTGCGGGTTGCAC	AAGATGGCCCCGCTGCGACC
ARL11	P1P2	ARL11_-_50202704.23-P1P2	ARL11_+_50202693.23-P1P2	GGAAAGCAGCTCCATAGGGG	TAGGGGAGGAGAGCCACGCC
ARL13A	P1P2	ARL13A_+_100224727.23-P1P2	ARL13A_-_100224705.23-P1P2	GATAAGATATGCAGAGTAAT	TCTTGTCAGATTAACACAGC
ARL13B	P1P2	ARL13B_-_93699034.23-P1P2	ARL13B_-_93699028.23-P1P2	GGGTCCCGCTAACTCGGCTA	AGTTAGCGGGACCCGGCTAC
ARL14	P1P2	ARL14_+_160395022.23-P1P2	ARL14_-_160394974.23-P1P2	GGATCTCACATGAAAATGTT	AGATGTGTTTATGTTGTAGC
ARL14EP	P1P2	ARL14EP_+_30344555.23-P1P2	ARL14EP_-_30344703.23-P1P2	GACACGAGGCTGGCCGCCTC	CACAGGCCACACTCGACCGC
ARL14EPL	ENST00000601302.2	ARL14EPL_-_115387369.23-ENST00000601302.2	ARL14EPL_-_115387263.23-ENST00000601302.2	GGCCCAGGCAGGACCTCACA	TACCAGTTGTTTCTGTCCAC
ARL15	P1P2	ARL15_-_53606154.23-P1P2	ARL15_-_53605934.23-P1P2	GGCGGGAGAAAGAACCCCAG	CAGAGGACTTTCTTTCCGGC
ARL16	P1P2	ARL16_+_79650729.23-P1P2	ARL16_+_79650784.23-P1P2	GGAAGACGCTGCTGGTGAAA	TGCTTCGCTCCACCCGGCAC
ARL17A	ENST00000329240.4,ENST00000336125.5,ENST00000445552.2	ARL17A_+_44656972.23-ENST00000329240.4,ENST00000336125.5,ENST00000445552.2	ARL17A_+_44656984.23-ENST00000329240.4,ENST00000336125.5,ENST00000445552.2	GTAGGTAGCGGTACCTTGAG	CTACCTACAACACCGCCGAC
ARL17B	ENST00000434041.2,ENST00000450673.3,ENST00000570618.1	ARL17B_+_44439047.23-ENST00000434041.2,ENST00000450673.3,ENST00000570618.1	ARL17B_+_44439059.23-ENST00000434041.2,ENST00000450673.3,ENST00000570618.1	GTAGGTAGCGGTACCTTGAG	CTACCTACAACACCGCCGAC
ARL2	P1P2	ARL2_-_64781999.23-P1P2	ARL2_-_64781781.23-P1P2	GTAGGCGGCCCGAGTGTCAG	CGCCACCCTCGCGGTTCCGC
ARL2BP	P1P2	ARL2BP_-_57279168.23-P1P2	ARL2BP_-_57279134.23-P1P2	GCGCAGGCGCTGACCCGACC	TGGATACCCTCTGCCGCCAC
ARL3	P1P2	ARL3_+_104474107.23-P1P2	ARL3_-_104474089.23-P1P2	GTGCGTGCGAGGGACGTCGG	CTGGTAACGGGGGAGGCAGC
ARL4A	P1P2	ARL4A_-_12726525.23-P1P2	ARL4A_-_12727353.23-P1P2	GTGCCGGGCGAGCACCGTTA	CCCGATCTGGAGTCTGGGTC
ARL4C	P1P2	ARL4C_+_235405676.23-P1P2	ARL4C_+_235405481.23-P1P2	GGGACTGTGAGGCTGCCGAG	CAGATGTTCGGCGCCCTCCC
ARL4D	P1P2	ARL4D_-_41476546.23-P1P2	ARL4D_-_41476396.23-P1P2	GCCATCGGAGGAGGGCGGGC	GCAGACACCCACCGCGCCTC
ARL5A	P1P2	ARL5A_+_152684919.23-P1P2	ARL5A_+_152684710.23-P1P2	GCTCGTCGCAGACAACGCGG	TCCAGACACCCGGGCCGCCC
ARL5B	P1P2	ARL5B_-_18948344.23-P1P2	ARL5B_-_18948348.23-P1P2	GTACAGACCGAGGGGACTAC	ACCCGTAGTCCCCTCGGTCC
ARL5C	P1P2	ARL5C_+_37322383.23-P1P2	ARL5C_-_37322341.23-P1P2	GCCCTAGACATGGCACTCAG	CTGATTTGCGGTAGTGGAGC
ARL6	P1P2	ARL6_-_97483565.23-P1P2	ARL6_+_97483472.23-P1P2	GGGAGGCGTGGCTTCAGGAC	CTGACCTTTTCCCGGAGCTC
ARL6IP1	P1	ARL6IP1_+_18812826.23-P1	ARL6IP1_+_18812823.23-P1	GTCGGTTGGAGGACTCGTTG	CCCCAACGAGTCCTCCAACC
ARL6IP1	P2	ARL6IP1_-_18809346.23-P2	ARL6IP1_-_18809283.23-P2	GAAACGCCGGACAGAACAGA	ATTCTAGCGCCTAGAATTTC
ARL6IP4	P1P2	ARL6IP4_-_123465296.23-P1P2	ARL6IP4_+_123465234.23-P1P2	GCCCGCAGGGCGGTCGAGGT	CCGCTTCCTCTCGAGAAGGC
ARL6IP5	P1P2	ARL6IP5_-_69134175.23-P1P2	ARL6IP5_-_69134411.23-P1P2	GCGCCGCCGCCAGATTCTGG	CGGATCGGTGTCCCGGGTAC
ARL6IP6	P1P2	ARL6IP6_-_153574693.23-P1P2	ARL6IP6_-_153574615.23-P1P2	GGTGAGCGTAGTGGGGAAGA	TAACTGCTCACCCCCATCTC
ARL8A	P1P2	ARL8A_-_202113804.23-P1P2	ARL8A_+_202113836.23-P1P2	GCGGTACGGCCCGGGTCCCG	ACGACTCGCTGCCCCGGAAC
ARL8B	P1P2	ARL8B_+_5164015.23-P1P2	ARL8B_+_5164028.23-P1P2	GCGACACGGGCGGACACCGG	GTGTCGCGCCGGGGCACCAC
ARL9	P1P2	ARL9_+_57371636.23-P1P2	ARL9_-_57371648.23-P1P2	GGGCTAAGAGCCTTCCACGT	TCCACGTGGGCCGCAGTCTC
ARMC1	P1P2	ARMC1_-_66546391.23-P1P2	ARMC1_+_66546422.23-P1P2	GTCAGGGAGCCAAAGAGCGA	AGGTGACCTGACGCCTCTGC
ARMC10	P1P2	ARMC10_+_102715597.23-P1P2	ARMC10_-_102715615.23-P1P2	GACGCCACCTGACCTGGATG	CCTGACCTGGATGTGGAGAC
ARMC12	P1P2	ARMC12_-_35704889.23-P1P2	ARMC12_+_35704899.23-P1P2	GAGGGCAACACTGAAGACAT	CCAATACCTGGGGCAACTGC
ARMC2	P1P2	ARMC2_+_109169685.23-P1P2	ARMC2_-_109169691.23-P1P2	GTCATCCTCCGGCTCTCCCC	CGGGTAGCGGCCAGGGATGC
ARMC3	P1P2	ARMC3_-_23217021.23-P1P2	ARMC3_-_23217031.23-P1P2	GGGAGCAGCTAGCTACTCGG	GGAGATCCCGCCGAGTAGCC
ARMC4	P1P2	ARMC4_-_28287617.23-P1P2	ARMC4_-_28287610.23-P1P2	GTGGTCCCCGGGAGGGAAAG	TCCCGGGGACCAAGACCCGC
ARMC5	P1P2	ARMC5_-_31470848.23-P1P2	ARMC5_+_31470860.23-P1P2	GTCTGAGGCCCGAGCCAAGA	ACCCTCACGGACTCGCTCTC
ARMC6	P1P2	ARMC6_+_19144442.23-P1P2	ARMC6_-_19144470.23-P1P2	GAGCGTCCGCCCAGAAGAAG	CCAGAGCGTCCGCCCAGAAC
ARMC7	P1P2	ARMC7_+_73106080.23-P1P2	ARMC7_-_73106057.23-P1P2	GGGCACTGGCGCACCGTCCC	GGCGGAAGCCGCGCTGTCCC
ARMC8	P1P2	ARMC8_-_137906385.23-P1P2	ARMC8_-_137906605.23-P1P2	GGCGCCTGCAGCAGCCGGGT	GTCTATCCCGCCTCTCCACC
ARMC9	P1P2	ARMC9_+_232063449.23-P1P2	ARMC9_+_232063422.23-P1P2	GCTCCCAGCACCAGGACGGC	CGGATGCAGCCGGGCCACCC
ARMCX1	P1P2	ARMCX1_-_100805594.23-P1P2	ARMCX1_-_100805586.23-P1P2	GTATAGCCCAGAGGGCGAGA	TCTGGGCTATAGGAAGAGTC
ARMCX2	P1P2	ARMCX2_-_100914798.23-P1P2	ARMCX2_-_100914849.23-P1P2	GCTCGCCTGGGTTAAACGCA	TCGTTCTCCGTCCTCCTCTC
ARMCX3	P1P2	ARMCX3_+_100878194.23-P1P2	ARMCX3_+_100878168.23-P1P2	GGCAGGCCGGCCCGCCCTCA	GTCTGAGTACCAGCTCCCCC
ARMCX4	P1P2	ARMCX4_-_100740511.23-P1P2	ARMCX4_-_100740693.23-P1P2	GGCATCGGGCCCGGGGAAAG	ACGGTTCGCCTGCACAGATC
ARMCX5	P1P2	ARMCX5_-_101854500.23-P1P2	ARMCX5_-_101854491.23-P1P2	GACCTCGTCTGCGGAGGAAA	CAGACGAGGTTCTTCCACGC
ARMCX5-GPRASP2	P1P2	ARMCX5-GPRASP2_-_101854500.23-P1P2	ARMCX5-GPRASP2_-_101854491.23-P1P2	GACCTCGTCTGCGGAGGAAA	CAGACGAGGTTCTTCCACGC
ARMCX6	P1P2	ARMCX6_-_100872930.23-P1P2	ARMCX6_-_100872948.23-P1P2	GACGCCTGCAGAGTAATAGG	CCGTCTGGGTACCAGCCCCC
ARMS2	P1P2	ARMS2_+_124214237.23-P1P2	ARMS2_+_124214219.23-P1P2	GGGTATAGGCGCAGCATGTA	CATTATGTCCCTGTACCCTC
ARNT	P1P2	ARNT_+_150848808.23-P1P2	ARNT_+_150849017.23-P1P2	GTATACCCAAGGGAGCGAGG	GGGTTGGCAGTAGTCGCCGC
ARNT2	P1P2	ARNT2_-_80696751.23-P1P2	ARNT2_+_80696737.23-P1P2	GGCCCGCGCCGTCCTTTGTG	TCCTTTGTGTGGCGGCGGCC
ARNTL	P1P2	ARNTL_+_13299385.23-P1P2	ARNTL_-_13299382.23-P1P2	GGAGTCCGGCGCGGGTAAAC	CCGTCCCTGACCTACTTTCC
ARNTL2	P1P2	ARNTL2_+_27485837.23-P1P2	ARNTL2_+_27485847.23-P1P2	GGCAGCCCGTAGGCGCGCAC	ACGGGCTGCGGTGGCGGCCC
ARPC1A	P1P2	ARPC1A_+_98923614.23-P1P2	ARPC1A_-_98923643.23-P1P2	GGGCCGTTACCTGGGATCGG	CTGCTGGCCGTTACCTGGGC
ARPC1B	P1P2	ARPC1B_-_98972410.23-P1P2	ARPC1B_-_98972364.23-P1P2	GGCCGGGGCGCGGGAGGTGA	AACCGGCTCTGGGCTCCGCC
ARPC2	P1	ARPC2_+_219082121.23-P1	ARPC2_-_219081929.23-P1	GTAAGGGAGGCAAGGACGGA	CTGCCGCTTCACCGACAAGC
ARPC3	P1	ARPC3_-_110888149.23-P1	ARPC3_+_110888087.23-P1	GCTGGCAGCCTGGGCGAGGT	AGAGGAGCAGGATCCAGGTC
ARPC4	P1P2	ARPC4_-_9834808.23-P1P2	ARPC4_-_9834275.23-P1P2	GGCCCAGCCAGCGCCCGCGA	CACCTCTAGCGGCTTTGCTC
ARPC4-TTLL3	P1	ARPC4-TTLL3_-_9834275.23-P1	ARPC4-TTLL3_+_9834261.23-P1	GAGCAAAGCCGCTAGAGGTG	CTAGAGGTGGGGTGCGGGTC
ARPC4-TTLL3	P2	ARPC4-TTLL3_+_9839357.23-P2	ARPC4-TTLL3_+_9839379.23-P2	GCCCGCACGGCACTCAGGTA	CATTGCAGGCTGCCCTCTGC
ARPC5	P1P2	ARPC5_+_183604818.23-P1P2	ARPC5_+_183604896.23-P1P2	GTAGAGGCAGCGCCAAGAAG	CTCTGAGGCGTCGCCGACTC
ARPC5L	P1	ARPC5L_+_127631498.23-P1	ARPC5L_-_127631510.23-P1	GGGCTCTGCTCCGCTCGCAC	CTCGCACCGGCTCCTGCTCC
ARPC5L	P2	ARPC5L_-_127624450.23-P2	ARPC5L_+_127624418.23-P2	GGAGGTCGGCGTCACGGTGT	CTGATAGCGAGGTCGGCGTC
ARPP19	P1P2	ARPP19_+_52861215.23-P1P2	ARPP19_+_52861067.23-P1P2	GGCTCCGTGTCGTCATAAGG	CGGGGACTTCCGCAGACATC
ARPP21	ENST00000187397.4	ARPP21_-_35683772.23-ENST00000187397.4	ARPP21_-_35683895.23-ENST00000187397.4	GGTTAGAGCATGCTCCACTG	AATATCCTTGTCCAGTATCC
ARR3	P1P2	ARR3_+_69488236.23-P1P2	ARR3_+_69488261.23-P1P2	GAGTATGGGCTAGAAGTAGA	TATATCCCTTGCTCTTAGCC
ARRB1	P1P2	ARRB1_-_75062680.23-P1P2	ARRB1_+_75062646.23-P1P2	GACGGTCGCAGGGAGGTCCG	ATGGTCCGCGACGGTCGCAC
ARRB2	P1P2	ARRB2_-_4613971.23-P1P2	ARRB2_-_4614022.23-P1P2	GATCTTGGCAGCGGGCGAGG	CCATGGTGCGCGCGCCCGCC
ARRDC1	P1P2	ARRDC1_+_140500210.23-P1P2	ARRDC1_+_140500153.23-P1P2	GCCCGGGGCTGTAGACGACG	GTGAGGCCGCGGCATGGGGC
ARRDC2	P1	ARRDC2_-_18119049.23-P1	ARRDC2_+_18118989.23-P1	GCGTTCTGAGGCTGCAGCGT	GTTGGTGAGCGCGCCTGCGC
ARRDC2	P2	ARRDC2_+_18111987.23-P2	ARRDC2_+_18111983.23-P2	GGGGCCCCCCCGGCGAACTT	GCCCAAGTTCGCCGGGGGGC
ARRDC3	P1P2	ARRDC3_+_90679122.23-P1P2	ARRDC3_-_90679139.23-P1P2	GTTAGCCGCCCGTCTTTGTA	CCCGTCTTTGTAAGGAGACC
ARRDC4	P1P2	ARRDC4_+_98503956.23-P1P2	ARRDC4_+_98503988.23-P1P2	GAGCCGTGCGGTACCCGATG	TACCCTGCCGCGAGCGCCTC
ARRDC5	P1P2	ARRDC5_-_4902803.23-P1P2	ARRDC5_+_4902700.23-P1P2	GCCAGGTAGATTCTATCCTC	ACGAGCTCCACCTTCACTAC
ARSA	P1P2	ARSA_+_51066539.23-P1P2	ARSA_+_51066550.23-P1P2	GCCCGGTACCGGCTCCTCCT	GTACCGGGCTGCGGGCGCTC
ARSB	P1P2	ARSB_+_78281066.23-P1P2	ARSB_+_78281107.23-P1P2	GACCGCGGGCGGACAAGGAT	GCCCCTTGTACCGCTGATAC
ARSD	P1P2	ARSD_+_2847160.23-P1P2	ARSD_+_2847390.23-P1P2	GGAGCCTGGGCCCCTGTAAA	CCCTCTCAGCTGCGGGATCC
ARSE	P1P2	ARSE_-_2882306.23-P1P2	ARSE_-_2882125.23-P1P2	GTGAATCCCCGATCAAGAAG	GTGACTTACAGGCCTAGGAC
ARSF	P1P2	ARSF_+_2984866.23-P1P2	ARSF_-_2984913.23-P1P2	GGTCTAGGAGCAGAACAGAC	ATCAGCCGTATTATCTCTCC
ARSG	ENST00000448504.2	ARSG_+_66255385.23-ENST00000448504.2	ARSG_+_66255329.23-ENST00000448504.2	GGCCCCGCCGGGGAAGTCCC	AGGCCGGCGGGCCCAGCAGC
ARSH	ENST00000381130.2	ARSH_-_2924713.23-ENST00000381130.2	ARSH_-_2924710.23-ENST00000381130.2	GGCAGATGACCTTGGAGTGG	CTCCAAGGTCATCTGCCATC
ARSI	P1P2	ARSI_-_149682457.23-P1P2	ARSI_+_149682294.23-P1P2	GGCGGGTCGAGGGGACACGG	TGGATTTCTCCCGCCTCCTC
ARSJ	P1P2	ARSJ_+_114900515.23-P1P2	ARSJ_+_114900753.23-P1P2	GTCAGGAGGCCGGTCCACTA	GCTTGGTCTTTGCGTAGTTC
ARSK	P1P2	ARSK_+_94890970.23-P1P2	ARSK_-_94891027.23-P1P2	GGCAGTAGCATCGCCGGTAG	CCAGCGCCAAGGCTGCGACC
ART1	P1P2	ART1_-_3666414.23-P1P2	ART1_+_3666404.23-P1P2	GCCAGGACAAGGCCTAGGTA	AGGTAAGGAGTGCACCACTC
ART3	P1	ART3_-_76995916.23-P1	ART3_+_76995900.23-P1	GGCTTACCACAACTGAGAGT	CAACTGAGAGTGGGGAGTCC
ART3	P2	ART3_+_76932405.23-P2	ART3_-_76932374.23-P2	GTGGCAGCAAACGTACCCAG	CCGGGTATAACCTCCTCACC
ART4	P1P2	ART4_-_14996357.23-P1P2	ART4_+_14996362.23-P1P2	GTGATCTAGTCTGTATTCAG	AAGTCCTGTTAAGTGTCAGC
ART5	P1P2	ART5_+_3663184.23-P1P2	ART5_-_3663166.23-P1P2	GTCCCGTGCGCCTGGAGACA	CTCGAAACCAGGACTCCAGC
ARTN	P1	ARTN_-_44399487.23-P1	ARTN_+_44399657.23-P1	GGCCCCCAGACAAGGCCCGG	CCCTCTCTTGGGCCCTCGGC
ARTN	P2	ARTN_+_44401656.23-P2	ARTN_+_44401650.23-P2	GCTCGGGCTGAGATCAGGCC	ATGCCCGGCCTGATCTCAGC
ARV1	P1P2	ARV1_-_231114864.23-P1P2	ARV1_+_231114927.23-P1P2	GGAGTGGAAATGGGCAACGG	CGGCCTCCTGCCAGTACAGC
ARVCF	P1	ARVCF_-_19974634.23-P1	ARVCF_-_19974404.23-P1	GCATCGGGCCGGGACTCGGG	CCGGGTATGCAGGGCGGGCC
ARVCF	P2	ARVCF_-_20004313.23-P2	ARVCF_+_20004326.23-P2	GGCGCGCAACCCGAGACCCC	TCACGCGGCCCGTGCGCAAC
ARX	P1	ARX_+_25034044.23-P1	ARX_-_25033780.23-P1	GCTTGTCCTGAGCGCGGAGA	CCTACTGCATCGACAGCATC
ARX	P2	ARX_-_25031175.23-P2	ARX_+_25031186.23-P2	GCGAGTCGCTGCCCGCAGAG	CGCCGTCCTTGCCCTCAGCC
AS3MT	P1P2	AS3MT_+_104629429.23-P1P2	AS3MT_+_104629247.23-P1P2	GGTCTCGAGACACAGCTCGG	CCGTCCTGAGTCGCAGGCCC
ASAH1	P1P2	ASAH1_-_17941607.23-P1P2	ASAH1_-_17941563.23-P1P2	GACTCCCCGGACTCCAGCAG	GGCCGGAGTTGCGTCGCCTC
ASAH2	ENST00000395526.4	ASAH2_-_52008322.23-ENST00000395526.4	ASAH2_-_52008325.23-ENST00000395526.4	GGATGGCACTCATCATTACA	CCTTGTAATGATGAGTGCCC
ASAH2B	P1P2	ASAH2B_-_52499912.23-P1P2	ASAH2B_-_52499925.23-P1P2	GGGCGTGCCCGGGAGTCGTT	CGTTCCCTCTCCCAACGACC
ASAP1	P1P2	ASAP1_-_131455906.23-P1P2	ASAP1_-_131455855.23-P1P2	GCCGAGCGCGGCGCAGGAAG	CGGGCGAGCACTGTGCGCTC
ASAP2	P1P2	ASAP2_+_9346962.23-P1P2	ASAP2_-_9346995.23-P1P2	GCTCAGAGCGAGCCCCGAGG	CCGCGTCCTCTCAGAGCGAC
ASAP3	P1P2	ASAP3_-_23810622.23-P1P2	ASAP3_+_23810517.23-P1P2	GCGGCGACGCTGAACTGCTC	CTCGGTACCGGGGCATCTTC
ASB1	P1P2	ASB1_-_239335714.23-P1P2	ASB1_-_239335717.23-P1P2	GGCGGAGGCGGAAGCATCCA	CCATGGATGCTTCCGCCTCC
ASB10	P1P2	ASB10_-_150884783.23-P1P2	ASB10_-_150884821.23-P1P2	GCCCAGATGGTGTCCCCAGT	AGAACAAGCCATGCCCTGGC
ASB11	P1	ASB11_+_15333577.23-P1	ASB11_+_15333701.23-P1	GAAATAGAAAAGAAGCGGCT	TAGAAAACAGGACCATCTTC
ASB11	P2	ASB11_-_15332626.23-P2	ASB11_-_15332629.23-P2	GCATTCTGATGCTTCGTCCT	CCAAGGACGAAGCATCAGAC
ASB12	ENST00000362002.2	ASB12_+_63450511.23-ENST00000362002.2	ASB12_-_63450451.23-ENST00000362002.2	GGCCCCTTGGACCAAGACTA	GGTTGGGGCCGTGGGGGCTC
ASB12	ENST00000396130.2	ASB12_+_63445448.23-ENST00000396130.2	ASB12_-_63445141.23-ENST00000396130.2	GCTCCTGCAGCCCGACAAGG	CTCCTGGTGGTAGCATCTAC
ASB13	P1P2	ASB13_+_5708362.23-P1P2	ASB13_+_5708331.23-P1P2	GGTGGTGGCGCGCCCCGCGC	ACCCCGCCAAACGCCCCCGC
ASB14	P1P2	ASB14_+_57326672.23-P1P2	ASB14_-_57326679.23-P1P2	GAACTTCACTGCTGTCCTAG	AGAGGATAAAACAAAAGGTC
ASB15	P1P2	ASB15_+_123241932.23-P1P2	ASB15_-_123241904.23-P1P2	GATCTTGTCATTCTTATCCA	TGGAGCCAATGTGTGCTTCC
ASB16	P1P2	ASB16_-_42248115.23-P1P2	ASB16_-_42248108.23-P1P2	GTAGTCGGGTCGAGGGAACC	TCGACCCGACTACCTCCCTC
ASB17	P1P2	ASB17_+_76398029.23-P1P2	ASB17_+_76398083.23-P1P2	GTGTCAAAATATGTAACTGG	TTTAAACTGTAACCAGAAAC
ASB18	P1P2	ASB18_-_237172801.23-P1P2	ASB18_-_237172983.23-P1P2	GTACCTAGCAGCATGCCGGT	ACTCGGATTACCTTCCCGAC
ASB2	P1P2	ASB2_+_94442860.23-P1P2	ASB2_-_94442824.23-P1P2	GCAGGGCAGAAGGAAAACTC	TTGTATTACCCCTGAATTGC
ASB3	P1P2	ASB3_+_54087070.23-P1P2	ASB3_-_54087116.23-P1P2	GCTCCCGGGATGCGCGGAGG	CTGCGCCCGCGTCTTGCCGC
ASB4	P1P2	ASB4_+_95115299.23-P1P2	ASB4_+_95115678.23-P1P2	GGCTCCAGATTTAGTGACAG	ACCCTTGGGCCTAGGACTTC
ASB5	P1P2	ASB5_+_177190311.23-P1P2	ASB5_-_177190327.23-P1P2	GAGCATCCCGGACGAGAGCC	GGACGAGAGCCAGGCACATC
ASB6	P1P2	ASB6_+_132404367.23-P1P2	ASB6_-_132404356.23-P1P2	GTGGACTGGCGGAGCAGGTG	GAGCGTTCCGGTCGGCGTCC
ASB7	P1P2	ASB7_-_101142768.23-P1P2	ASB7_-_101142815.23-P1P2	GCTCCACTGCGGGCGCTGAT	TTCAGCACTTTGGGGTCACC
ASB8	P1P2	ASB8_+_48551218.23-P1P2	ASB8_-_48551252.23-P1P2	GTGAGTGCGGTCCTTGGAGT	AGCAATTCGGTGAGTGCGGC
ASB9	P1P2	ASB9_+_15288172.23-P1P2	ASB9_+_15287888.23-P1P2	GCATGCCTCTCTCTGATCAC	CTATGACTCACCGCCCATCC
ASCC1	P1P2	ASCC1_-_73975994.23-P1P2	ASCC1_-_73975670.23-P1P2	GCTAGAAAAATGGAGAAGGT	TACCTTGGTTTACCTGCAGC
ASCC2	P1P2	ASCC2_+_30234208.23-P1P2	ASCC2_+_30234214.23-P1P2	GCTGTCACCGTGGTCGGCGG	ACCACGGTGACAGCTCCCTC
ASCL1	P1P2	ASCL1_-_103351499.23-P1P2	ASCL1_+_103351491.23-P1P2	GCGTGGAAGGCGCACCGACA	ACAGGGATCCGGCCAGGGAC
ASCL2	P1P2	ASCL2_-_2292271.23-P1P2	ASCL2_-_2292240.23-P1P2	GAGGCGCGCAAGATCCCCGG	TGTTGTCGCCAGGGCCGCGC
ASCL3	P1P2	ASCL3_-_8964516.23-P1P2	ASCL3_+_8964499.23-P1P2	GTCTTCCCCACGGGCCACTC	CACGGGCCACTCTGGAGAAC
ASCL4	ENST00000342331.4	ASCL4_+_108168289.23-ENST00000342331.4	ASCL4_+_108168471.23-ENST00000342331.4	GTCAAGTCAAGGAAGACCCG	CTGGTCCACTTTCCCTCCGC
ASCL5	P1P2	ASCL5_+_201096314.23-P1P2	ASCL5_+_201096304.23-P1P2	GCCCGGCCAGAGGCTGCTGA	AGCAGCACCTTCAGCAGCCC
ASF1A	P1P2	ASF1A_-_119215921.23-P1P2	ASF1A_+_119215456.23-P1P2	GACTTGTTTGAGCGGAGGAG	CTGCACGACGTCTGGCCGGC
ASF1B	P1P2	ASF1B_-_14247341.23-P1P2	ASF1B_+_14247360.23-P1P2	GGCCGCGCCTGGGTCCGGTG	GGTCCACTCCCGCCTCTTCC
ASGR1	P1P2	ASGR1_-_7082627.23-P1P2	ASGR1_-_7082650.23-P1P2	GCAGCCGTGGACAATGGGAG	TCCTATGGACCCTGCCCGCC
ASGR2	P1P2	ASGR2_-_7017962.23-P1P2	ASGR2_-_7017981.23-P1P2	GGGTGTGGAGAGCGGACACC	GGGTTGCCTGCGGGAGCCAC
ASH1L	P1P2	ASH1L_+_155532507.23-P1P2	ASH1L_+_155532498.23-P1P2	GCTGAGGGGTAGTGAGGGAC	CCTCGTCCAGTCCCTCACTC
ASH2L	P1P2	ASH2L_-_37963059.23-P1P2	ASH2L_-_37963062.23-P1P2	GATTCTCGCGAGAAGTCCAG	CCCCTGGACTTCTCGCGAGC
ASIC1	P1P2	ASIC1_-_50451465.23-P1P2	ASIC1_+_50451752.23-P1P2	GCGCGCACCGCGCCGAGCCC	GGACTCTCCTCCCTCTGGAC
ASIC2	ENST00000359872.6	ASIC2_-_32484240.23-ENST00000359872.6	ASIC2_-_32484256.23-ENST00000359872.6	GGGCGCGGAGAGGCGAGGAC	CAGTCTCCAGATACCGGTCC
ASIC3	P1P2	ASIC3_+_150748330.23-P1P2	ASIC3_-_150748335.23-P1P2	GCGGCTCGGGATCCGCACCA	TGGAGAGCTCCTTGGCGTAC
ASIC4	P1P2	ASIC4_-_220379183.23-P1P2	ASIC4_+_220379356.23-P1P2	GGCTGTGCTGGTGCTGATAA	CCACTGCCACTCGGGAGGGC
ASIC5	P1P2	ASIC5_-_156787409.23-P1P2	ASIC5_+_156787402.23-P1P2	GAGTTAAGCAAGAGTCCTCA	CAGGGTAACCCAATTTTCAC
ASIP	P1P2	ASIP_-_32781974.23-P1P2	ASIP_-_32782578.23-P1P2	GGCTCCTGACTCCAAGCTGT	TGGAGCTCACCTCTCTCTAC
ASL	P1P2	ASL_-_65540899.23-P1P2	ASL_+_65541008.23-P1P2	GTGGAGGACGCCGAGCACCG	GTCTTGTCTTCCAGACCCGC
ASMT	P1P2	ASMT_-_1734188.23-P1P2	ASMT_+_1734013.23-P1P2	GTACGCTCTGTGGGACAAGG	CCTTGCCAGCAGGCTCTGTC
ASMTL	P1P2	ASMTL_-_1571721.23-P1P2	ASMTL_+_1571556.23-P1P2	GCAGCAGCTTCCCAATCACC	TAGAGTTCCTGAGTCGCTGC
ASNA1	P1P2	ASNA1_+_12848373.23-P1P2	ASNA1_-_12848537.23-P1P2	GGCTCCAGCGGCTCCACATC	CTTCGCCCAGTGGTATATCC
ASNS	P1P2	ASNS_+_97501749.23-P1P2	ASNS_-_97501690.23-P1P2	GCGCGTTACAGGAGCCAGGT	CATCACCCTGACCTGCTTAC
ASNSD1	P1P2	ASNSD1_-_190526200.23-P1P2	ASNSD1_-_190526273.23-P1P2	GGCGCTGTGGCTAATGCCGT	CTGGTCGCGTCCCTCGGCTC
ASPA	P1P2	ASPA_+_3379320.23-P1P2	ASPA_+_3379511.23-P1P2	GAGTACAGAATTCCCTTGAG	ATGGGAATGAGCTAACCGGC
ASPDH	P1P2	ASPDH_+_51017895.23-P1P2	ASPDH_-_51017868.23-P1P2	GAGGCACCCTCAAGGCACAG	CTCCAGGCCTCGAAGGCTTC
ASPG	P1	ASPG_+_104552082.23-P1	ASPG_+_104552087.23-P1	GGGACCGGGGACCACGGGAG	GTGGTCCCCGGTCCGGCATC
ASPG	P2	ASPG_+_104571288.23-P2	ASPG_+_104571259.23-P2	GTCTGAGAAGGCACAAGGAC	TCACTGGACTCCCAGCCCAC
ASPH	P1P2	ASPH_+_62627059.23-P1P2	ASPH_+_62627074.23-P1P2	GCAGGCGGTGCTGAGGCACA	CCTGCAGCACCTGGGAAGAC
ASPHD1	P1P2	ASPHD1_-_29911917.23-P1P2	ASPHD1_-_29911974.23-P1P2	GAGCCCAGGAAGGAGCGAGT	TCGCTCCTCACTAGCCCCGC
ASPHD2	P1P2	ASPHD2_-_26825273.23-P1P2	ASPHD2_-_26825290.23-P1P2	GCGCAGCGCGGCGTCGGCAC	CGCCGGTGCCCCTGCCGGTC
ASPM	P1P2	ASPM_+_197115513.23-P1P2	ASPM_-_197115391.23-P1P2	GGGAAGTGAGCCCGACCGAG	CACGGACGCTGTCTCTGGCC
ASPN	P1P2	ASPN_+_95244763.23-P1P2	ASPN_+_95244720.23-P1P2	GACTAACATGGACTAATCTG	GGTGTGGCTGCACCCTGGGC
ASPRV1	ENST00000320256.4	ASPRV1_+_70188959.23-ENST00000320256.4	ASPRV1_-_70189027.23-ENST00000320256.4	GGGTAGTCCCCCTTCAACAG	TGTCCTCATCTGTTATTCTC
ASPSCR1	P1P2	ASPSCR1_-_79935528.23-P1P2	ASPSCR1_-_79935518.23-P1P2	GTCACGTGAGCGGAAAATGG	CTCACGTGACCCGCCGCCGC
ASRGL1	P1P2	ASRGL1_+_62105004.23-P1P2	ASRGL1_-_62104973.23-P1P2	GGACGCCGAGACCTCAAGCT	CTCCCCGACGCCGGCTCGAC
ASS1	P1P2	ASS1_-_133320387.23-P1P2	ASS1_+_133320409.23-P1P2	GCCGCTGCCCGAGCCCGGTA	ACTCCCTAGCCGAGAGCACC
ASTE1	P1P2	ASTE1_+_130745613.23-P1P2	ASTE1_+_130745639.23-P1P2	GGAAAGCAGAGGAGGACCGG	ACTTGGGTCGGCGAACACTC
ASTL	ENST00000342380.2	ASTL_+_96804167.23-ENST00000342380.2	ASTL_+_96804158.23-ENST00000342380.2	GAGCAGGGCTCTACCATGGA	CCTACACCCTCCATGGTAGC
ASTN1	P1P2	ASTN1_+_177133808.23-P1P2	ASTN1_+_177133827.23-P1P2	GAGGCGGCCGGGGCTCAAGA	TCCTCCTAGCGCTGCGATGC
ASTN2	P1P2	ASTN2_-_120177339.23-P1P2	ASTN2_-_120177334.23-P1P2	GGGACGCCCGAGCTAAGGAG	TAGCTCGGGCGTCCTGGTTC
ASUN	P1P2	ASUN_-_27090898.23-P1P2	ASUN_+_27090863.23-P1P2	GTAGCACACCGGTCCTTCCC	CGATCATCTCCTAGCACACC
ASXL1	P1P2	ASXL1_+_30946335.23-P1P2	ASXL1_-_30946176.23-P1P2	GCTGCGTCAGTCGCCCACGG	GGGTGCGTGCGTGTCTGCCC
ASXL2	P1P2	ASXL2_+_26101313.23-P1P2	ASXL2_+_26100928.23-P1P2	GGTACAGTAAGAACCCAATA	CTTCAGCCGGGTCCCTGGGC
ASXL3	P1P2	ASXL3_-_31158240.23-P1P2	ASXL3_-_31158223.23-P1P2	GCCCGGAGCTGTCACCGCAG	GGGATGCTCCGCTCGGCCCC
ASZ1	P1P2	ASZ1_+_117067530.23-P1P2	ASZ1_+_117067548.23-P1P2	GAGGGCGCGCGGTGCCGACA	TTCAGCTCTCCGGGCGCATC
ATAD1	P1P2	ATAD1_+_89577892.23-P1P2	ATAD1_-_89577928.23-P1P2	GTGGTTCCCGTGGGGCCTCA	TGGGTGAGTAGCTGGTTCCC
ATAD2	P1P2	ATAD2_+_124408604.23-P1P2	ATAD2_-_124408650.23-P1P2	GGCGCACGCCGAGGCCAGTA	GGAGCTGGATCTCTCTCCGC
ATAD2B	P1P2	ATAD2B_+_24149925.23-P1P2	ATAD2B_+_24149936.23-P1P2	GGCGAGAACGGGAGAGAAAG	GTTCTCGCTCTCGAGCTCCC
ATAD3A	P1P2	ATAD3A_+_1448130.23-P1P2	ATAD3A_-_1448112.23-P1P2	GCGGCGGTAACTGAAGACCA	CTGTAACCTATGAGCGCCAC
ATAD3B	P1	ATAD3B_+_1407208.23-P1	ATAD3B_+_1407150.23-P1	GCCCCCACCCGAGTCTGACT	GCGCAGTGGTCCTGGCCACC
ATAD3C	P1P2	ATAD3C_-_1397877.23-P1P2	ATAD3C_-_1398044.23-P1P2	GTAGAGAGTCCCTCTCAAGG	TCTGTCAGCCGAGCGATCTC
ATAD5	P1P2	ATAD5_-_29159373.23-P1P2	ATAD5_+_29159022.23-P1P2	GGGAAGCGGGGAGTATGGTG	CCGAAGCTCTGTGGTCCGAC
ATAT1	P1P2	ATAT1_-_30594710.23-P1P2	ATAT1_-_30594683.23-P1P2	GCTGTTCCCGGAGCGGATCA	CATCGAACGGGAACTCCATC
ATCAY	P1P2	ATCAY_-_3880723.23-P1P2	ATCAY_-_3880720.23-P1P2	GGAAGAAGCAGCTACCTCGG	AGGTAGCTGCTTCTTCCCAC
ATE1	P1P2	ATE1_+_123687896.23-P1P2	ATE1_+_123687521.23-P1P2	GTCAGGGCCGGCTACCACTG	CCACCCCACAATGCAGCGCC
ATF1	P1P2	ATF1_-_51158152.23-P1P2	ATF1_+_51157878.23-P1P2	GGGGGAAGGACGCGGGAACG	CCAGTAGCGGCCCTGACTGC
ATF2	P1P2	ATF2_-_176032440.23-P1P2	ATF2_+_176032892.23-P1P2	GCTCTGAACTGACCCAAGTA	ACAGGCTTCCGTCCTCTCTC
ATF3	P1P2	ATF3_+_212782164.23-P1P2	ATF3_+_212782151.23-P1P2	GGGCCGGCGCGCGGGCTGAA	CCCGAGCGCACCCTTCAGCC
ATF4	P1P2	ATF4_-_39916548.23-P1P2	ATF4_-_39917038.23-P1P2	GGACGAAGTCTATAAAGGGC	CGTTTCGTGGGGCAACAGCC
ATF6	P1P2	ATF6_+_161736292.23-P1P2	ATF6_+_161736178.23-P1P2	GCCACGAGTGGGCGGAAGTA	TGGAGTCACCTTTTAGCCCC
ATF6B	P1P2	ATF6B_-_32095947.23-P1P2	ATF6B_+_32095825.23-P1P2	GTGTCGGTGAAGAAACGCGT	CCGCTTCTTTCCCGCGTGCC
ATF7	P1P2	ATF7_+_54019710.23-P1P2	ATF7_+_54019638.23-P1P2	GAAGTAGCCCCGGGGGGCAC	ATGATCCTTCCATTAGGCTC
ATF7IP	P1	ATF7IP_-_14518605.23-P1	ATF7IP_-_14518679.23-P1	GGCGCGTGCAAGGGAGAAGC	CAGCTTTTCGCGCGCTTCAC
ATF7IP	P2	ATF7IP_-_14538334.23-P2	ATF7IP_-_14538285.23-P2	GTCACATGCATCAGGACCAG	AAGCAGCTACAAAGACTAGC
ATF7IP2	P1P2	ATF7IP2_-_10479940.23-P1P2	ATF7IP2_-_10479924.23-P1P2	GTAACGGCTGCGGTTCGAAG	TTAACAATGCTGGTCCGGCC
ATG10	P1P2	ATG10_+_81267917.23-P1P2	ATG10_-_81267907.23-P1P2	GCCCCGAGGCCAACCAGAAG	TCAGTCAGGTCCGCGGCCTC
ATG12	P1P2	ATG12_-_115177215.23-P1P2	ATG12_-_115177477.23-P1P2	GCTCCAGCAGCAATTGAAGT	ACCGCTCCTCTCCCGAGGTC
ATG13	P1P2	ATG13_-_46639118.23-P1P2	ATG13_-_46639144.23-P1P2	GCCCCCGGCCATTACCGAAG	CCATCGTTAGTGTTTGTTTC
ATG14	P1P2	ATG14_+_55878313.23-P1P2	ATG14_-_55878514.23-P1P2	GGCCGCGACCGGGAGAGGTA	GGGCGCTGGAGGCTCCTGGC
ATG16L1	P1P2	ATG16L1_+_234160346.23-P1P2	ATG16L1_-_234160341.23-P1P2	GGGAGCTCACCTCCACACAC	CGAGGCCATCCGGGACGGTC
ATG16L2	P1P2	ATG16L2_-_72525477.23-P1P2	ATG16L2_-_72525493.23-P1P2	GGGAGGAACGCGCCGCTAGG	TGGCCGCGCTCTCCCGCCTC
ATG2A	P1P2	ATG2A_-_64684556.23-P1P2	ATG2A_-_64684666.23-P1P2	GGTAGTGGTGCAGCAAGTAG	GACGGGGATCGCCGGCGGGC
ATG2B	P1P2	ATG2B_-_96829681.23-P1P2	ATG2B_+_96829705.23-P1P2	GAGGCGCGTTCCCGGCTGTA	AGACTCCCGGCGCGCCGCCC
ATG3	P1P2	ATG3_-_112280679.23-P1P2	ATG3_-_112280503.23-P1P2	GGGAGACCTGAGGTGAGAAG	CTCGGGTGCTGCCAGCCGGC
ATG4A	P1P2	ATG4A_+_107335009.23-P1P2	ATG4A_-_107335240.23-P1P2	GTCCACCGGCAACTTGACTA	TTGTCCCTTCCGCCTGCCAC
ATG4B	P1P2	ATG4B_+_242577150.23-P1P2	ATG4B_+_242577182.23-P1P2	GCTGCGGAAAGACCGACCCC	TATCATTGGCCTCCCCTGCC
ATG4C	P1P2	ATG4C_-_63249832.23-P1P2	ATG4C_+_63249892.23-P1P2	GGTAGCTGCGGCGCTGAGGT	GGTTGGTGGCTCCTGCACAC
ATG4D	P1P2	ATG4D_-_10654651.23-P1P2	ATG4D_-_10654604.23-P1P2	GTGCCTGGCCCGGTACCCTG	TCGCCATCTTAGCGGGCCAC
ATG5	P1P2	ATG5_+_106773313.23-P1P2	ATG5_+_106773494.23-P1P2	GTAGGTGTGGTAGGAAGGAG	GACACACTGTCCTGCGGGGC
ATG7	P1P2	ATG7_-_11314095.23-P1P2	ATG7_-_11314116.23-P1P2	GCGCGCCTCAGAGAGAGCTG	CCGCTCAACTTCCGGCAACC
ATG9A	P1P2	ATG9A_-_220093869.23-P1P2	ATG9A_+_220094211.23-P1P2	GACCAGGGCCCGTGGAGCCC	GACACGGGGCCTGGGATTCC
ATG9B	P1P2	ATG9B_-_150721519.23-P1P2	ATG9B_-_150721533.23-P1P2	GTCGGCTCACCATCAGGCCA	TTCTGGAGAAGCCGTGGCCC
ATHL1	P1P2	ATHL1_-_289141.23-P1P2	ATHL1_+_289204.23-P1P2	GGGACCGCGGACCTTCCTGG	ACGCTGGCGCCCGGCGACCC
ATIC	P1P2	ATIC_+_216176831.23-P1P2	ATIC_+_216177046.23-P1P2	GTGGGTTCAGGGCGAGCGGG	TAGAGCAGCTCGCGGGTGTC
ATL1	P1P2	ATL1_-_51026934.23-P1P2	ATL1_+_51026923.23-P1P2	GCAACCTGCGGCCCCGGAGA	CGGAGAAGGCAGCGAGCGCC
ATL2	P1P2	ATL2_+_38604354.23-P1P2	ATL2_+_38604390.23-P1P2	GAGGGCAGCAACCGCACCAG	CTCCGCCATCTTGTACCGAC
ATL3	P1P2	ATL3_-_63439002.23-P1P2	ATL3_-_63438854.23-P1P2	GTGGCCCAACGGACAGCCCG	TCTCCTCTGCACCCCTGCTC
ATM	P1P2	ATM_-_108093813.23-P1P2	ATM_-_108093795.23-P1P2	GTAGGTAGCTGCGTGGCTAA	ACTCCCGCTTCCGGTTCAAC
ATMIN	P1P2	ATMIN_+_81069685.23-P1P2	ATMIN_+_81069661.23-P1P2	GGGGACAGCTCGCTCACCGA	CCGGCGGGGGAGCTGATCCC
ATN1	P1P2	ATN1_+_7036968.23-P1P2	ATN1_+_7037039.23-P1P2	GTGCGTCCGGCGACTCGCAC	TTTCGGAGGGACCGCGGCTC
ATOH1	P1P2	ATOH1_+_94750042.23-P1P2	ATOH1_-_94749954.23-P1P2	GCTCGGAGGCTCAGGATCGG	CCACCCACTCGGAGATCACC
ATOH7	P1P2	ATOH7_-_69991496.23-P1P2	ATOH7_+_69991516.23-P1P2	GCCGCTCAGGACCTGCGCGT	AACGTGCCTCTTCTGAGCAC
ATOH8	P1P2	ATOH8_-_85981251.23-P1P2	ATOH8_-_85981376.23-P1P2	GGGGAGAGCCAGAGACTCCT	TTCAGCTCCTTCACGCACAC
ATOX1	P1P2	ATOX1_-_151137767.23-P1P2	ATOX1_+_151137709.23-P1P2	GGCAGCCAGGAGGAAGGCTC	CACCGCCCTCCTTCAGGCCC
ATP10A	P1P2	ATP10A_+_26108493.23-P1P2	ATP10A_+_26108418.23-P1P2	GGCGGGCGGCGAGGACAAGG	CGTCCACTCCCGTCCAGCCC
ATP10B	P1P2	ATP10B_+_160279194.23-P1P2	ATP10B_+_160278964.23-P1P2	GTTCACTCTTGGGCCTAGCG	TATTGAGCAGACTCCAGTAC
ATP10D	P1P2	ATP10D_+_47487444.23-P1P2	ATP10D_+_47487367.23-P1P2	GCAAATTCGAAGAGTGAAAG	CAGCTGAGTTTGGGAGATGC
ATP11A	P1P2	ATP11A_-_113344323.23-P1P2	ATP11A_+_113344507.23-P1P2	GACGTGCGCGCCCGGAGCAG	CCAGTGGAGCAGCTGCCGAC
ATP11B	P1P2	ATP11B_+_182511382.23-P1P2	ATP11B_-_182511533.23-P1P2	GGCGCCGCGTCCCCATCCCG	TCCGGGTCCCGCGGGGCGCC
ATP11C	ENST00000361648.2	ATP11C_-_138914378.23-ENST00000361648.2	ATP11C_-_138914367.23-ENST00000361648.2	GCAGAAATTTGGCAACACAA	AATTTCTGCATGTCAGTATC
ATP12A	P1P2	ATP12A_+_25254566.23-P1P2	ATP12A_+_25254562.23-P1P2	GGAGGGGGACCGACAGCTAG	ACCCCTAGCTGTCGGTCCCC
ATP13A1	P1P2	ATP13A1_-_19774270.23-P1P2	ATP13A1_-_19774415.23-P1P2	GGGTAAAGCAGCCCGGCGAA	GCCTGACGGGCAGCCCAAGC
ATP13A2	P1P2	ATP13A2_-_17338380.23-P1P2	ATP13A2_+_17338415.23-P1P2	GGGCTGGAGCAGGGCTGACG	ACACTGCCGCAGTCCCTCCC
ATP13A3	P1P2	ATP13A3_-_194207568.23-P1P2	ATP13A3_-_194207695.23-P1P2	GGCCGGCAGGGCGAGAACAA	GCTCTCCCCGCAGCGTGATC
ATP13A4	P1P2	ATP13A4_+_193272611.23-P1P2	ATP13A4_+_193272617.23-P1P2	GCGTCTGCACGACAAGGTCA	TGTCGTGCAGACGCTTCCAC
ATP13A5	P1P2	ATP13A5_+_193096393.23-P1P2	ATP13A5_+_193096510.23-P1P2	GAGCCCAAGGCGGTGAGTAT	TCTGAACTCAACCGGCGAGC
ATP1A2	P1	ATP1A2_+_160085566.23-P1	ATP1A2_+_160085574.23-P1	GCCAGCCCGTCTGGGACAGT	AGACGGGCTGGTGTGGGCTC
ATP1A2	P2	ATP1A2_-_160098352.23-P2	ATP1A2_+_160098236.23-P2	GGTTAGTGGAGTAGAATCAG	CCTAATGGGCATTTCATCTC
ATP1A3	P1P2	ATP1A3_+_42498357.23-P1P2	ATP1A3_+_42498353.23-P1P2	GCTCTGTGCGGTGGGACCAA	TCCGTTGGTCCCACCGCACC
ATP1A4	P1	ATP1A4_+_160147246.23-P1	ATP1A4_+_160147240.23-P1	GGAGAAGGGCCCCAAAAGGT	TGGCCTACCTTTTGGGGCCC
ATP1A4	P2	ATP1A4_+_160121443.23-P2	ATP1A4_+_160121435.23-P2	GAAGATGCCGCAAGGCCCAC	ACCTTCCTGTGGGCCTTGCC
ATP1B1	P1P2	ATP1B1_-_169075945.23-P1P2	ATP1B1_-_169075993.23-P1P2	GCGCACTCCGAGAGCCGCAG	CTCGGCTTCTCCGGCCTGGC
ATP1B2	P1P2	ATP1B2_-_7554273.23-P1P2	ATP1B2_-_7554254.23-P1P2	GAGGAGCGGAGCCTCCGCCT	CAGCAGTGCGAGGCCCGCGC
ATP1B3	P1P2	ATP1B3_-_141595462.23-P1P2	ATP1B3_+_141595611.23-P1P2	GCAGGCTCCCGCGGCCCAAG	CAGCTCCTCTCGCCGTCCGC
ATP1B4	P1P2	ATP1B4_+_119495941.23-P1P2	ATP1B4_+_119495968.23-P1P2	GCTGCTGGTACAGGAGACAC	GAACTCTCACCCGATTGCCC
ATP2A1	P1P2	ATP2A1_-_28889826.23-P1P2	ATP2A1_-_28889833.23-P1P2	GGGTGGCCGGCTGCTCAAGT	CCGTCCCACTTGAGCAGCCC
ATP2A2	P1P2	ATP2A2_+_110719114.23-P1P2	ATP2A2_+_110719087.23-P1P2	GGCCGCACGCCCGACAGCGG	CCTTTTCCTTCGCCGCAGTC
ATP2A3	P1P2	ATP2A3_-_3867723.23-P1P2	ATP2A3_+_3867694.23-P1P2	GGTGCTGGGACCTTACCCGA	TGTCCGTGCTGGGACCTTAC
ATP2B1	P1P2	ATP2B1_+_90102587.23-P1P2	ATP2B1_+_90102595.23-P1P2	GCAGCGTGAGTAGGGAGCCC	TACTCACGCTGCACTGCGAC
ATP2B2	P1	ATP2B2_-_10547214.23-P1	ATP2B2_+_10547196.23-P1	GCAGCCCCGTAATCGCGGTG	CGTAATCGCGGTGCGGCAGC
ATP2B2	P2	ATP2B2_+_10749772.23-P2	ATP2B2_+_10749781.23-P2	GAGTGCAGCGGTGGCAGAGG	CCGCTGCACTGCGCTCTGCC
ATP2B3	P1P2	ATP2B3_+_152783182.23-P1P2	ATP2B3_+_152783139.23-P1P2	GCGCGGGACGCGACCCTCTG	GTGCAGAGCGTGGGGAGCAC
ATP2B4	P1P2	ATP2B4_-_203595955.23-P1P2	ATP2B4_+_203595956.23-P1P2	GGAGCTGGTGAGCAAGAGTC	GAGTTAGCTAGAGCTGTTGC
ATP2C1	P1P2	ATP2C1_+_130613389.23-P1P2	ATP2C1_+_130613095.23-P1P2	GCGGCGCTGACGAGAGGCTG	CTTCTCCCGAGGCGCGCGGC
ATP2C2	P1P2	ATP2C2_-_84402154.23-P1P2	ATP2C2_-_84402192.23-P1P2	GGGTCCGGCCCAGGAGGCTT	TAGGTCCCCGGCGAGGCCCC
ATP4A	P1	ATP4A_+_36054525.23-P1	ATP4A_+_36054542.23-P1	GACAGGCACCGGGCACCATG	GTGCTCCCACCCAACAGAGC
ATP4A	P2	ATP4A_-_36048687.23-P2	ATP4A_+_36048719.23-P2	GCGCTCCAGCACGCGCTCGG	CGGGTCCTCCAGCGTATGGC
ATP4B	P1P2	ATP4B_+_114312452.23-P1P2	ATP4B_+_114312468.23-P1P2	GCTCAGGCCAGGGACGATGG	GAGATCCTCCCGTCTGCTCC
ATP5A1	P1	ATP5A1_-_43678159.23-P1	ATP5A1_+_43678210.23-P1	GAGTCCGGCCCGCCGAGGAA	CAGGCGGTACTTCTGCAGCC
ATP5C1	P1P2	ATP5C1_+_7830168.23-P1P2	ATP5C1_-_7830158.23-P1P2	GACACCCGCGCGAGAGAACA	TGCTGAAGGTCGGTCAGGCC
ATP5D	P1P2	ATP5D_+_1241904.23-P1P2	ATP5D_+_1241964.23-P1P2	GGCGGCCTCGGCATAGGCAC	TCACCTTCGCCTCTCCCACC
ATP5E	P1P2	ATP5E_-_57607352.23-P1P2	ATP5E_+_57607367.23-P1P2	GGGCCGAATCGCCAAGACGC	GGCGGTTCAGCCGCAGGAAC
ATP5G1	P1P2	ATP5G1_-_46970249.23-P1P2	ATP5G1_-_46970159.23-P1P2	GAGCGCTGTGGGCCAAGCAG	ACGTGTCCTGGACCTTCTCC
ATP5G2	P1P2	ATP5G2_-_54069813.23-P1P2	ATP5G2_-_54069695.23-P1P2	GGCGCGTGCGCAGCGCACAG	TAGAGTTGGCTCTTCCGCGC
ATP5G3	P1P2	ATP5G3_-_176046397.23-P1P2	ATP5G3_+_176046225.23-P1P2	GCACTTACCTTCCCAGGAGG	TCCAGGGGCCTGTTCTTCCC
ATP5H	P1P2	ATP5H_+_73043037.23-P1P2	ATP5H_+_73042983.23-P1P2	GACTTGCTGCGGAGGACCGT	GGGATCGGATCCAATGCCCC
ATP5I	P1P2	ATP5I_-_668029.23-P1P2	ATP5I_+_668023.23-P1P2	GGCGGAGAGACCTGCACCGG	GTGGCACCATCTTGTCCCTC
ATP5J	P1P2	ATP5J_+_27107880.23-P1P2	ATP5J_+_27107938.23-P1P2	GCGGCCGCACTCACCCACTC	CGTTCCGGGGCCTTTTCCCC
ATP5J2	P1P2	ATP5J2_+_99063727.23-P1P2	ATP5J2_-_99063736.23-P1P2	GGAGTGTCCGGCCCCAGGTA	GGTAAGGCTGTTTGGACTCC
ATP5J2-PTCD1	P1	ATP5J2-PTCD1_-_99036346.23-P2	ATP5J2-PTCD1_-_99036387.23-P2	GGGCGCAGTGCACTCCGACG	AGGAAGAGACTGGTTCGCCC
ATP5L	P1P2	ATP5L_+_118272718.23-P1P2	ATP5L_+_118272598.23-P1P2	GGCGATCTCAGGGGGCGTAA	TCCACTCGTCTGACCTGCAC
ATP5L2	ENST00000505920.1	ATP5L2_+_43036328.23-ENST00000505920.1	ATP5L2_-_43036335.23-ENST00000505920.1	GCACGCAGGGTCCTTCCGGG	GGGGGTGACCTTCAGCTGGC
ATP5O	P1P2	ATP5O_-_35288080.23-P1P2	ATP5O_-_35288102.23-P1P2	GGCAGCCATCTTCTCCCGGG	ACTCGGGTTTGACCTACAGC
ATP5S	P1P2	ATP5S_+_50779479.23-P1P2	ATP5S_+_50779095.23-P1P2	GCGAGGATTAGGGCCGGACA	TCCGACGCTGTGAGTAGAGC
ATP5SL	P1P2	ATP5SL_-_41945747.23-P1P2	ATP5SL_+_41945774.23-P1P2	GGAATGCGGAGGCTGTAGAG	GTCACTTACCGCCCAGGGAC
ATP6AP1	P1P2	ATP6AP1_-_153657070.23-P1P2	ATP6AP1_-_153657002.23-P1P2	GCATGGCGACGGCTCGAGTG	CAGATCAGGTGACCGTTGCC
ATP6AP1L	P1P2	ATP6AP1L_-_81575697.23-P1P2	ATP6AP1L_-_81575610.23-P1P2	GTCTGGGAGGCCACTTGGGA	ACTCCCAAGCTCAAAACTTC
ATP6AP2	P1P2	ATP6AP2_+_40440259.23-P1P2	ATP6AP2_+_40440280.23-P1P2	GGAACGGGCCGGCGGGACAC	TGTCGCCCCGCAGTGCTGCC
ATP6V0A1	P1P2	ATP6V0A1_-_40610927.23-P1P2	ATP6V0A1_+_40610918.23-P1P2	GCTGCTCCTGGAGCCGCGGA	CGGAGGGTGCGGGTTTGGCC
ATP6V0A2	P1P2	ATP6V0A2_-_124196959.23-P1P2	ATP6V0A2_-_124196923.23-P1P2	GGCCGCGGTGGCAGAACCGG	CCACAGCAGTCCGCGAGGTC
ATP6V0A4	P1	ATP6V0A4_+_138458656.23-P1	ATP6V0A4_+_138458660.23-P1	GGACTGCTAGCAAGCACGGA	TGCTTGCTAGCAGTCCTGGC
ATP6V0A4	P2	ATP6V0A4_+_138482908.23-P2	ATP6V0A4_+_138482911.23-P2	GTGCCGAGCAAGCCGAGTGG	CTCGGCTTGCTCGGCAGGTC
ATP6V0B	P1P2	ATP6V0B_+_44440710.23-P1P2	ATP6V0B_-_44440640.23-P1P2	GAGCAGTGCTAGCCCCGTCA	GCAGTCTGTCCGCCCGCCCC
ATP6V0C	P1P2	ATP6V0C_+_2564168.23-P1P2	ATP6V0C_+_2564165.23-P1P2	GCGCTCACCGCTGAAGACCA	CCATGGTCTTCAGCGGTGAC
ATP6V0D1	P1P2	ATP6V0D1_-_67515053.23-P1P2	ATP6V0D1_-_67515028.23-P1P2	GGCACGAATCGCGACTCCCC	GTCCTGGTTCTCCGGTCCCC
ATP6V0D2	P1P2	ATP6V0D2_+_87111202.23-P1P2	ATP6V0D2_-_87111152.23-P1P2	GTCCGCACCTTCGAGCATGG	CTGAAGATTTGCACTAGCCC
ATP6V0E1	P1P2	ATP6V0E1_-_172411000.23-P1P2	ATP6V0E1_-_172410857.23-P1P2	GGGCCCGCCTTGGGAGGAAC	CCTGAGCGCCAACCCCTACC
ATP6V0E2	P1P2	ATP6V0E2_+_149571079.23-P1P2	ATP6V0E2_-_149571160.23-P1P2	GGGTGCGCGGGTCCCCAGCC	TCATGGCCGGGCGCAGGATC
ATP6V1B1	P1P2	ATP6V1B1_-_71163062.23-P1P2	ATP6V1B1_-_71163238.23-P1P2	GAGCAGCAGGCTCAGACACT	TGACCTCACCCGTCACGGTC
ATP6V1C2	P1P2	ATP6V1C2_+_10861821.23-P1P2	ATP6V1C2_-_10862143.23-P1P2	GGCGCGGGCCGCGCGGTAGG	TTCGGACTCCCGGTCCCGCC
ATP6V1D	P1P2	ATP6V1D_+_67826485.23-P1P2	ATP6V1D_+_67826497.23-P1P2	GCCCGTAGAGGAAGACACTG	CTACGGGAGTCAGCTGGTTC
ATP6V1E1	P1P2	ATP6V1E1_+_18111483.23-P1P2	ATP6V1E1_-_18111500.23-P1P2	GGGAACCCGAGATCTGCGCA	GAGATCTGCGCAGGGGTTCC
ATP6V1E2	P1P2	ATP6V1E2_-_46769671.23-P1P2	ATP6V1E2_+_46769509.23-P1P2	GGCGGCCCTCGCAGGGAGTG	CGTCTTCTCCCAGCATCGGC
ATP6V1F	P1P2	ATP6V1F_-_128502898.23-P1P2	ATP6V1F_+_128503227.23-P1P2	GAGGCCGACGGGGCGCCGTA	TTCCGGAGCGGAGGCCTCCC
ATP6V1G1	P1P2	ATP6V1G1_+_117350079.23-P1P2	ATP6V1G1_-_117350067.23-P1P2	GGAGCAAGGCAAGCGGCCTA	CTTGGGTCAGCTGACACAGC
ATP6V1G2	P1P2	ATP6V1G2_-_31514322.23-P1P2	ATP6V1G2_+_31514126.23-P1P2	GAGAAGCTGCTGGATACCTT	TCCTAACCAGCCTCCAGACC
ATP6V1G3	P1P2	ATP6V1G3_-_198509781.23-P1P2	ATP6V1G3_-_198509802.23-P1P2	GCCCTGAGACTGGCTTGTCA	CTTGCTTGGAGCAGACTACC
ATP6V1H	P1P2	ATP6V1H_-_54755805.23-P1P2	ATP6V1H_-_54755777.23-P1P2	GTGAGGGCCGCACAGGTAGA	TGGTGCGGGACCCGCTTCAC
ATP7A	P1P2	ATP7A_+_77166215.23-P1P2	ATP7A_+_77166283.23-P1P2	GGGAGAAGTCACAGTAGCTG	CGGTCTGCGTAGCTCCAGAC
ATP7B	P1P2	ATP7B_+_52586109.23-P1P2	ATP7B_+_52586074.23-P1P2	GTTGCTTCCTTTGGGACCCA	CCTCCTCGGACTCTGCGCCC
ATP8A1	P1P2	ATP8A1_-_42659065.23-P1P2	ATP8A1_-_42659112.23-P1P2	GCCCGCACGCCGACAGGAGG	AGCTCTGCGGGCGCCGCCAC
ATP8A2	P1P2	ATP8A2_-_25946184.23-P1P2	ATP8A2_-_25946360.23-P1P2	GTTGGCCGCTGCGGCACGGA	TTCAGCATCTCGCCCGTGTC
ATP8B1	P1P2	ATP8B1_+_55470527.23-P1P2	ATP8B1_-_55470587.23-P1P2	GCCAGAGGCACCTCCCCGAG	CAGCGAGGCTCGGCGGCCGC
ATP8B2	P1	ATP8B2_-_154298056.23-P1	ATP8B2_-_154301762.23-P2	GTAGCGGGCCGAGGCCCCGG	TAGAGGGGCTCTCTTGGGCC
ATP8B3	P1P2	ATP8B3_-_1812230.23-P1P2	ATP8B3_-_1812227.23-P1P2	GAGGCCGCGGGCGTCCAGGG	TGGACGCCCGCGGCCTGCCC
ATP8B4	P1P2	ATP8B4_-_50411385.23-P1P2	ATP8B4_+_50411389.23-P1P2	GCAGTGCAGGAAGATCAAAC	TTCCGTGACCATGCCAAGGC
ATP9A	P1P2	ATP9A_+_50384863.23-P1P2	ATP9A_+_50384859.23-P1P2	GGCCGGTGCGCCAGAAGAAG	TCCGCTTCTTCTGGCGCACC
ATP9B	P1P2	ATP9B_-_76829452.23-P1P2	ATP9B_+_76829480.23-P1P2	GTACCCGGTGCGTAGCGCAG	ACTACAGCGCCGCGGGGCCC
ATPAF1	P1P2	ATPAF1_+_47133920.23-P1P2	ATPAF1_-_47134124.23-P1P2	GAGGTGGCCGGTCTCTACCG	GAACCTTGGGCGCGCGGAAC
ATPAF2	P1P2	ATPAF2_+_17942476.23-P1P2	ATPAF2_+_17942446.23-P1P2	GGCGCGCCGTAGGTGTCATG	TCAACCTCCCTTGGACGCCC
ATPIF1	P1P2	ATPIF1_-_28562890.23-P1P2	ATPIF1_-_28562775.23-P1P2	GAGTCCGAGAATGTCGACCG	AGCCGAAGCCTCGGGCTTGC
ATRAID	P1P2	ATRAID_-_27435226.23-P1P2	ATRAID_-_27435232.23-P1P2	GCGCGAGCAGCGGAGCACCA	TTCCCTTGGTGCTCCGCTGC
ATRIP	P1P2	ATRIP_-_48488199.23-P1P2	ATRIP_-_48488160.23-P1P2	GGTCCAGTTCTCCGGCCTGG	CTTGCCTCCGCCGCGAGTGC
ATRN	P1P2	ATRN_-_3451695.23-P1P2	ATRN_+_3451744.23-P1P2	GCCCGCACGGCCAGGCGAAG	CGGGAAGATGGTGGCTGCAC
[truncated: 19,379 more rows]
