# Supplementary material for: Maximizing CRISPRi efficacy and accessibility with dual-sgRNA libraries and optimal effectors
Source: eLife. 2022 Dec 28;11:e81856. doi: 10.7554/eLife.81856 (PMC9829409; doi:10.7554/eLife.81856)
Supplement: Supplementary file 2. [file elife-81856-supp2.csv]

sgID	gene	dual_rep1_T0_count	dual_rep1_T10_count	dual_rep2_T0_count	dual_rep2_T10_count	single_rep1_T0_count	single_rep1_T10_count	single_rep2_T0_count	single_rep2_T10_count	dual_rep1_gamma	dual_rep2_gamma	single_rep1_gamma	single_rep2_gamma
AARS_+_70323318.23-P1P2|AARS_+_70323353.23-P1P2	AARS	1320	17	1379	19	3787	378	4317	291	-0.656737293	-0.666015848	-0.37658177	-0.445731462
ABCE1_-_146019502.23-P1P2|ABCE1_+_146019651.23-P1P2	ABCE1	430	18	430	5	3228	167	3106	186	-0.4813881	-0.671964321	-0.464748847	-0.464061789
ACTR10_+_58666892.23-P1P2|ACTR10_+_58666933.23-P1P2	ACTR10	1770	42	1587	40	6143	857	6772	743	-0.570463379	-0.580659161	-0.331624955	-0.369406217
ACTR6_-_100594606.23-P1P2|ACTR6_-_100594617.23-P1P2	ACTR6	4300	396	4290	688	2983	351	3028	330	-0.371020053	-0.310504942	-0.354379305	-0.370226063
AFG3L2_-_12377212.23-P1P2|AFG3L2_+_12377215.23-P1P2	AFG3L2	1976	335	2034	381	5420	647	6693	521	-0.279852198	-0.287415417	-0.352593612	-0.423313127
ANAPC13_-_134204795.23-P1P2|ANAPC13_-_134204769.23-P1P2	ANAPC13	1006	159	1010	198	4985	1217	5577	1224	-0.289908113	-0.280402959	-0.256226832	-0.260414474
ANAPC2_+_140082989.23-P1P2|ANAPC2_+_140082993.23-P1P2	ANAPC2	524	28	548	125	1978	476	1824	272	-0.447700322	-0.257702114	-0.258034467	-0.320824225
ANAPC4_+_25378934.23-P1P2|ANAPC4_-_25378972.23-P1P2	ANAPC4	864	11	757	105	2324	387	2159	154	-0.654056555	-0.330934816	-0.307603787	-0.436393209
ANAPC5_+_121790181.23-P1P2|ANAPC5_-_121790201.23-P1P2	ANAPC5	421	28	436	41	3989	566	4071	578	-0.415083922	-0.386369085	-0.329273501	-0.328804454
AP2M1_+_183892702.23-P1|AP2M1_-_183892660.23-P1	AP2M1	1439	17	1577	1	3011	331	3573	299	-0.669619109	-1.026195872	-0.363525699	-0.411727346
AQR_-_35261877.23-P1P2|AQR_+_35261872.23-P1P2	AQR	169	6	175	14	1091	130	922	107	-0.49157645	-0.404132299	-0.352111448	-0.359469343
ARCN1_-_118443150.23-P1P2|ARCN1_-_118443372.23-P1P2	ARCN1	208	13	123	10	1457	267	1494	181	-0.418902351	-0.398212593	-0.294574222	-0.353235514
ASCC3_-_101329197.23-P1P2|ASCC3_-_101329188.23-P1P2	ASCC3	5260	598	4670	834	7510	949	9126	785	-0.339679259	-0.294638685	-0.344977938	-0.407696189
ATF5_+_50432363.23-P1P2|ATF5_+_50432513.23-P1P2	ATF5	476	51	430	1	2579	210	3083	195	-0.34616959	-0.83435802	-0.403767712	-0.455497464
ATP1A1_-_116915944.23-P1P2|ATP1A1_-_116915929.23-P1P2	ATP1A1	1759	101	1702	40	3679	259	4548	395	-0.440530732	-0.590993948	-0.423493514	-0.405999088
ATP5B_-_57039709.23-P1P2|ATP5B_-_57039762.23-P1P2	ATP5B	2701	163	2488	202	4712	669	6290	549	-0.433628618	-0.410635739	-0.329221592	-0.405323923
ATP5F1_+_111992112.23-P1P2|ATP5F1_-_111991570.23-P1P2	ATP5F1	1437	79	1493	150	5175	1231	6371	720	-0.446636891	-0.378929294	-0.259728385	-0.364744781
ATP6V1A_+_113465895.23-P1P2|ATP6V1A_-_113465930.23-P1P2	ATP6V1A	1691	17	1531	37	8064	537	8120	350	-0.693704073	-0.586584353	-0.431238768	-0.516155833
ATP6V1B2_-_20054940.23-P1P2|ATP6V1B2_-_20054985.23-P1P2	ATP6V1B2	891	25	934	43	6959	935	7770	532	-0.543173155	-0.491924299	-0.336707031	-0.443503529
ATP6V1C1_-_104033344.23-P1P2|ATP6V1C1_+_104033345.23-P1P2	ATP6V1C1	655	38	704	58	3146	402	3807	271	-0.436722804	-0.406826498	-0.343306896	-0.437119897
ATR_-_142297649.23-P1P2|ATR_+_142297629.23-P1P2	ATR	877	105	830	137	9732	1239	12104	885	-0.330926415	-0.305529757	-0.344000261	-0.433281037
ATXN10_-_46067769.23-P1P2|ATXN10_+_46067906.23-P1P2	ATXN10	3594	81	3087	36	4593	348	5563	361	-0.579794674	-0.694138718	-0.41371124	-0.451809744
AURKB_-_8113837.23-P1P2|AURKB_-_8113518.23-P1P2	AURKB	385	11	364	5	1745	321	1723	220	-0.533549382	-0.64739553	-0.294128909	-0.345111891
BCAS2_+_115123990.23-P1P2|BCAS2_+_115124198.23-P1P2	BCAS2	1351	51	1141	83	8356	742	9709	798	-0.501763169	-0.425903661	-0.392505549	-0.414856971
BCR_-_23522920.23-P1P2|BCR_+_23523145.23-P1P2	BCR	203	28	242	32	2032	353	1890	302	-0.306525553	-0.335267275	-0.30187358	-0.310010273
BDP1_+_70751690.23-P1P2|BDP1_-_70751510.23-P1P2	BDP1	816	132	798	62	3529	163	3992	213	-0.286283885	-0.415631351	-0.480014843	-0.482314603
BGLAP_-_156182834.23-P1P2|BGLAP_+_156183115.23-P1P2	BGLAP	2846	13	3057	28	8185	723	8596	643	-0.808950761	-0.728707163	-0.393210787	-0.42963307
BIRC5_-_76210386.23-P1P2|BIRC5_-_76210383.23-P1P2	BIRC5	297	22	412	21	1219	236	1414	201	-0.397743174	-0.473602108	-0.287119677	-0.328179868
BMS1_-_43278259.23-P1P2|BMS1_-_43278283.23-P1P2	BMS1	1388	80	1278	105	4135	449	4452	403	-0.439603869	-0.408265401	-0.365280153	-0.399496723
BNIP1_-_172571554.23-P1P2|BNIP1_-_172571577.23-P1P2	BNIP1	2199	230	1890	225	5993	675	6990	656	-0.351773423	-0.354154191	-0.360437597	-0.393955081
BORA_+_73302094.23-P1P2|BORA_-_73302125.23-P1P2	BORA	335	8	267	40	2220	711	2486	396	-0.55579554	-0.317656496	-0.219581178	-0.310603068
BUB3_-_124913930.23-P1P2|BUB3_-_124913973.23-P1P2	BUB3	1498	12	1345	27	4719	375	5144	291	-0.724217127	-0.612592007	-0.40731221	-0.473300473
BUD13_-_116643467.23-P1P2|BUD13_+_116643652.23-P1P2	BUD13	298	16	286	13	3041	612	3109	330	-0.443388336	-0.486612933	-0.282179395	-0.374377971
C12orf45_-_105380143.23-P1P2|C12orf45_-_105380117.23-P1P2	C12orf45	1627	67	1544	89	5797	652	6727	413	-0.489442509	-0.460381992	-0.360622317	-0.460579015
C12orf60_-_14956657.23-P1P2|C12orf60_-_14956654.23-P1P2	C12orf60	987	67	1039	54	4603	392	4417	222	-0.41485475	-0.474671959	-0.397994857	-0.491746166
C14orf166_+_52456301.23-P1P2|C14orf166_+_52456277.23-P1P2	C14orf166	4112	320	4037	418	8476	911	10406	830	-0.396080576	-0.375041904	-0.366794992	-0.419585223
C14orf178_+_78227476.23-P1P2|C14orf178_+_78227426.23-P1P2	C14orf178	220	41	186	22	1861	209	1821	193	-0.263165387	-0.349910115	-0.360434598	-0.37431068
C17orf49_+_6915949.23-P1|C17orf49_+_6915965.23-P1	C17orf49	5155	597	4851	591	12630	1422	14452	998	-0.336917947	-0.351096382	-0.360581276	-0.442287354
C3orf17_-_112738463.23-P1P2|C3orf17_-_112738075.23-P1P2	C3orf17	854	7	757	49	3735	319	3980	292	-0.712875063	-0.442006974	-0.397533552	-0.432409252
CAD_+_27440280.23-P1P2|CAD_+_27440253.23-P1P2	CAD	2788	35	2368	13	4079	179	5147	113	-0.664823987	-0.798616576	-0.486986794	-0.621367597
CARF_-_203776953.23-P1P2|CARF_+_203776955.23-P1P2	CARF	1933	110	1636	78	6107	715	7641	415	-0.441982268	-0.488201647	-0.355226816	-0.479861435
CARS_+_3078579.23-P1P2|CARS_-_3078598.23-P1P2	CARS	383	33	230	21	2982	254	3425	191	-0.377235213	-0.387715947	-0.397799363	-0.475286965
CASP8AP2_-_90539622.23-P1P2|CASP8AP2_-_90539614.23-P1P2	CASP8AP2	1084	23	1012	34	1950	205	1862	123	-0.584379847	-0.537594842	-0.369322981	-0.448227937
CCDC174_-_14693290.23-P1P2|CCDC174_-_14693300.23-P1P2	CCDC174	2106	233	1979	233	4647	600	5432	589	-0.343395691	-0.355810473	-0.342002947	-0.371210112
CCDC84_-_118868873.23-P1P2|CCDC84_-_118868883.23-P1P2	CCDC84	3335	1052	2957	787	5979	1585	6806	1113	-0.187391962	-0.235670567	-0.245141222	-0.306685323
CCDC86_-_60609614.23-P1P2|CCDC86_-_60609589.23-P1P2	CCDC86	1403	121	1166	73	3296	352	3455	305	-0.380039584	-0.447840748	-0.367445996	-0.403329792
CCT2_-_69979270.23-P1P2|CCT2_-_69979656.23-P1P2	CCT2	1251	84	1127	35	5796	565	6618	406	-0.416896523	-0.549325468	-0.379877653	-0.46069216
CCT3_+_156308067.23-P1P2|CCT3_-_156307693.23-P1P2	CCT3	628	49	530	32	3797	346	4609	253	-0.39333877	-0.450815999	-0.388830906	-0.477960838
CCT4_+_62115703.23-P1P2|CCT4_-_62115399.23-P1P2	CCT4	492	26	539	11	2600	392	2854	217	-0.44898021	-0.602832307	-0.3210022	-0.426622164
CCT6A_-_56119502.23-P1P2|CCT6A_+_56119464.23-P1P2	CCT6A	837	32	963	56	3228	420	4027	227	-0.498240664	-0.458175158	-0.34088352	-0.473717829
CCT7_-_73461472.23-P1P2|CCT7_-_73461481.23-P1P2	CCT7	946	4	787	20	4534	214	4883	342	-0.798331782	-0.575975883	-0.477285266	-0.439783779
CCT8_+_30445740.23-P1P2|CCT8_-_30446001.23-P1P2	CCT8	1193	139	1248	180	3196	508	3855	538	-0.335289503	-0.325666198	-0.313947621	-0.331492084
CD3EAP_-_45909922.23-P1P2|CD3EAP_-_45909946.23-P1P2	CD3EAP	2272	115	2382	130	7862	877	9007	531	-0.459523134	-0.468947792	-0.361779941	-0.467038518
CDAN1_+_43029296.23-P1P2|CDAN1_-_43029292.23-P1P2	CDAN1	1853	159	1809	227	5629	628	6924	483	-0.38106521	-0.346380552	-0.361706669	-0.440541947
CDC16_+_115000554.23-P1P2|CDC16_-_115000772.23-P1P2	CDC16	579	95	494	99	2831	852	2995	407	-0.283803218	-0.276559297	-0.227987101	-0.335597721
CDC20_-_43824671.23-P1P2|CDC20_-_43824687.23-P1P2	CDC20	191	16	235	65	1543	422	1408	363	-0.377235213	-0.228487618	-0.240766499	-0.234863227
CDC23_+_137548970.23-P1P2|CDC23_-_137548987.23-P1P2	CDC23	218	17	184	25	1284	106	1328	98	-0.388349333	-0.330197947	-0.401340562	-0.430512901
CDC27_+_45266576.23-P1P2|CDC27_-_45266589.23-P1P2	CDC27	273	22	236	33	1924	457	1860	407	-0.38520317	-0.327158876	-0.259784794	-0.260683919
CDC40_+_110501678.23-P1P2|CDC40_+_110501672.23-P1P2	CDC40	273	12	244	22	1880	181	1825	335	-0.470412512	-0.389842848	-0.38109793	-0.288242984
CDC5L_-_44355475.23-P1P2|CDC5L_+_44355487.23-P1P2	CDC5L	256	33	195	4	1542	123	1378	86	-0.31726234	-0.582435652	-0.406129383	-0.456651885
CDCA8_+_38158230.23-P1P2|CDCA8_-_38158209.23-P1P2	CDCA8	111	1	111	1	699	153	656	116	-0.616350665	-0.635158314	-0.270344199	-0.293393607
CDK1_-_62538284.23-P1P2|CDK1_+_62538309.23-P1P2	CDK1	262	10	301	43	2616	643	2654	685	-0.489242222	-0.324873293	-0.255237354	-0.234838159
CEBPG_-_33864240.23-P1P2|CEBPG_-_33864647.23-P1P2	CEBPG	1422	23	1477	43	3811	302	4540	303	-0.624880947	-0.559609544	-0.407609045	-0.447317486
CEBPZ_+_37458499.23-P1P2|CEBPZ_+_37458502.23-P1P2	CEBPZ	1856	213	1822	214	5254	613	6329	441	-0.33787615	-0.356116415	-0.355667155	-0.440689396
CENPA_-_27008942.23-P2|CENPA_-_27008960.23-P2	CENPA	3448	54	3467	68	2760	124	3382	127	-0.63325002	-0.619175609	-0.483499929	-0.537090731
CENPC_-_68411108.23-P1P2|CENPC_-_68411111.23-P1P2	CENPC	2223	150	2295	191	5191	652	5687	532	-0.416887043	-0.406940025	-0.345737742	-0.394410967
CENPE_+_104119357.23-P1P2|CENPE_-_104119523.23-P1P2	CENPE	854	73	850	20	2219	340	2445	274	-0.380633514	-0.587345094	-0.318782653	-0.365753044
CENPI_-_100353207.23-P1P2|CENPI_-_100353200.23-P1P2	CENPI	2541	56	2409	87	7126	536	8465	399	-0.582344803	-0.529423774	-0.414818625	-0.502142107
CENPJ_+_25496834.23-P1P2|CENPJ_+_25496971.23-P1P2	CENPJ	1263	128	1232	112	5137	697	5548	624	-0.356019254	-0.393398396	-0.335342645	-0.365467202
CENPM_+_42342939.23-P1P2|CENPM_+_42343131.23-P1P2	CENPM	1883	55	1872	83	2449	565	3078	601	-0.540250603	-0.499037703	-0.263753846	-0.278698038
CENPP_+_95087933.23-P1P2|CENPP_-_95088235.23-P1P2	CENPP	2225	185	2052	113	6336	509	7078	460	-0.385887325	-0.467460873	-0.405933572	-0.4516621
CENPT_+_67867777.23-P1P2|CENPT_-_67867769.23-P1P2	CENPT	2414	399	2617	398	6207	1347	6849	1350	-0.283700184	-0.318216666	-0.272109011	-0.277329428
CEP192_+_12991384.23-P1P2|CEP192_+_12991736.23-P1P2	CEP192	720	7	749	57	2497	397	2923	388	-0.687416972	-0.418499591	-0.313849673	-0.339273259
CHAF1B_+_37757724.23-P1P2|CHAF1B_+_37757745.23-P1P2	CHAF1B	1416	22	1357	31	3292	415	3328	152	-0.630606065	-0.594165777	-0.345140695	-0.506490714
CHCHD4_+_14166228.23-P1P2|CHCHD4_-_14165915.23-P1P2	CHCHD4	2329	73	2496	59	2588	303	3212	195	-0.530357492	-0.591278661	-0.355000943	-0.461944379
CHEK1_-_125495912.23-P1P2|CHEK1_-_125495934.23-P1P2	CHEK1	277	30	257	29	2324	332	2298	323	-0.342788536	-0.358209721	-0.328214485	-0.330204502
CHERP_+_16653219.23-P1P2|CHERP_-_16653216.23-P1P2	CHERP	1295	74	1252	42	7072	602	7900	370	-0.440747806	-0.538595918	-0.398163618	-0.503116544
CHMP2A_+_59066420.23-P1P2|CHMP2A_+_59066434.23-P1P2	CHMP2A	575	26	671	94	1568	272	1783	279	-0.472218426	-0.329329102	-0.301974846	-0.31326624
CHMP3_-_86790522.23-P1P2|CHMP3_+_86790491.23-P1P2	CHMP3	218	34	204	17	2907	398	3116	306	-0.289036909	-0.399728004	-0.334002334	-0.386573842
CHMP6_-_78965692.23-P1P2|CHMP6_+_78965716.23-P1P2	CHMP6	1126	27	1378	45	9156	1203	10326	960	-0.567029956	-0.542790472	-0.339747476	-0.395504417
CINP_+_102829193.23-P1P2|CINP_-_102829164.23-P1P2	CINP	1478	43	1436	23	1697	322	1983	381	-0.54012083	-0.645048367	-0.289952219	-0.281112543
CIT_-_120314748.23-P1P2|CIT_-_120314778.23-P1P2	CIT	2177	256	1902	218	3205	513	3510	476	-0.334343291	-0.359740062	-0.313008647	-0.335971141
CLNS1A_-_77348782.23-P1P2|CLNS1A_-_77348773.23-P1P2	CLNS1A	2248	11	1938	14	4009	131	4644	106	-0.796759621	-0.758811138	-0.526472034	-0.615161443
CLSPN_-_36235152.23-P1P2|CLSPN_+_36235482.23-P1P2	CLSPN	372	56	391	59	2445	510	2541	316	-0.295728189	-0.317582937	-0.277316595	-0.349448617
CLTC_+_57697290.23-P1P2|CLTC_+_57697263.23-P1P2	CLTC	1310	97	1302	149	4025	306	4134	314	-0.402519112	-0.359691895	-0.413205137	-0.426989982
CMAS_-_22199218.23-P1P2|CMAS_-_22199189.23-P1P2	CMAS	3502	522	3547	294	4472	1137	4408	869	-0.299202964	-0.407787845	-0.250747716	-0.277251768
CNOT1_+_58663696.23-P1P2|CNOT1_-_58663535.23-P1P2	CNOT1	453	48	397	45	1660	350	1847	293	-0.347663679	-0.359103779	-0.275772663	-0.311135358
COG2_+_230778253.23-P1P2|COG2_+_230778281.23-P1P2	COG2	10	159	2545	177					0.384669149	-0.433409169
COG3_+_46039129.23-P1P2|COG3_-_46039126.23-P1P2	COG3	2628	260	2554	220	7908	745	9493	847	-0.360143367	-0.401946233	-0.384533282	-0.40195359
COG8_+_69373427.23-P1P2|COG8_-_69373434.23-P1P2	COG8	1494	101	1572	185	10593	1459	11963	1028	-0.416159102	-0.35573098	-0.33340799	-0.407897434
COPA_+_160313013.23-P1P2|COPA_+_160313005.23-P1P2	COPA	271	45	218	18	1688	195	1587	330	-0.280589377	-0.401501	-0.356588984	-0.26863057
COPB1_-_14521352.23-P1P2|COPB1_-_14521337.23-P1P2	COPB1	158	8	121	21	708	73	712	85	-0.444052842	-0.293349994	-0.370882879	-0.354692263
COPB2_+_139108455.23-P1P2|COPB2_+_139108459.23-P1P2	COPB2	299	42	279	57	3499	364	3550	399	-0.305294662	-0.272857811	-0.370994851	-0.365451253
COPS4_-_83956404.23-P1P2|COPS4_-_83956572.23-P1P2	COPS4	4129	105	3648	215	8960	1028	10525	991	-0.562173717	-0.458011081	-0.35800702	-0.393512313
COPS6_-_99686651.23-P1P2|COPS6_-_99686659.23-P1P2	COPS6	3299	75	3131	175	8759	623	11020	449	-0.57835562	-0.465699498	-0.42238984	-0.525105873
COPZ1_+_54718920.23-P1|COPZ1_-_54719176.23-P1	COPZ1	380	56	322	22	3494	624	3723	362	-0.298897481	-0.430698629	-0.298282497	-0.388205688
COX10_-_13972882.23-P1P2|COX10_-_13972875.23-P1P2	COX10	3089	440	3325	589	5982	1167	7583	766	-0.305936726	-0.29577782	-0.286456743	-0.382409489
COX11_+_53045977.23-P1P2|COX11_+_53045613.23-P1P2	COX11	2206	75	2600	104	3960	304	4721	427	-0.518274938	-0.514589691	-0.411891767	-0.39964557
CPSF1_+_145634685.23-P1P2|CPSF1_+_145634667.23-P1P2	CPSF1	2323	213	2697	200	3993	644	4619	591	-0.371378868	-0.424017742	-0.312030058	-0.345175388
CPSF2_-_92588375.23-P1P2|CPSF2_+_92588358.23-P1P2	CPSF2	619	126	540	38	4268	482	4795	387	-0.251970209	-0.428880408	-0.360005741	-0.417528641
CRNKL1_+_20033001.23-P1P2|CRNKL1_-_20032878.23-P1P2	CRNKL1	190	24	170	14	2407	407	2493	448	-0.318857675	-0.399872145	-0.305556326	-0.291680333
CSE1L_-_47662888.23-P1P2|CSE1L_-_47662891.23-P1P2	CSE1L	497	1	600	57	2891	339	2506	254	-0.83919197	-0.385761312	-0.354833576	-0.381507893
CSTF1_+_54967480.23-P1P2|CSTF1_-_54967707.23-P1P2	CSTF1	96	1	136	1	3680	380	4085	305	-0.594876329	-0.66494081	-0.372008711	-0.429675047
CSTF3_-_33182802.23-P1P2|CSTF3_-_33182791.23-P1P2	CSTF3	4098	631	3966	534	5489	1025	6977	967	-0.294396276	-0.336293834	-0.292339605	-0.332690205
CTR9_-_10772912.23-P1P2|CTR9_+_10772881.23-P1P2	CTR9	214	6	195	2	3073	370	3226	172	-0.526649112	-0.657944422	-0.35129761	-0.48226654
CWC15_+_94706513.23-P1P2|CWC15_+_94706688.23-P1P2	CWC15	439	58	427	23	5013	567	5361	767	-0.315249396	-0.466013802	-0.359837151	-0.327658401
CWC22_+_180871433.23-P1P2|CWC22_+_180871546.23-P1P2	CWC22	510	71	526	56	3699	428	3851	309	-0.307851654	-0.36890977	-0.356704119	-0.418353557
CWF19L2_+_107328479.23-P1P2|CWF19L2_+_107328464.23-P1P2	CWF19L2	1418	80	1381	209	3123	414	3173	363	-0.442795173	-0.318656414	-0.338361642	-0.362631004
DAP3_-_155658904.23-P1P2|DAP3_-_155658930.23-P1P2	DAP3	3342	508	3102	675	2641	850	2936	712	-0.296273115	-0.265405611	-0.21893998	-0.244646
DARS_-_136742757.23-P1P2|DARS_-_136743104.23-P1P2	DARS	1058	54	938	65	2475	404	3084	390	-0.456906797	-0.43262064	-0.310306155	-0.346899075
DBR1_+_137893744.23-P1P2|DBR1_+_137893686.23-P1P2	DBR1	1930	23	1820	31	5787	512	6506	420	-0.670472303	-0.637531294	-0.392924537	-0.452686472
DCAF13_-_104427649.23-P1P2|DCAF13_+_104427404.23-P1P2	DCAF13	1306	107	1312	64	3464	558	3669	571	-0.387551596	-0.484433771	-0.312167619	-0.314365054
DCTN3_+_34620457.23-P1P2|DCTN3_+_34620473.23-P1P2	DCTN3	2474	35	2414	11	5403	201	6241	307	-0.646985539	-0.824245409	-0.509332601	-0.495315228
DDX18_-_118572337.23-P1P2|DDX18_-_118572282.23-P1P2	DDX18	152	1	172	7	1667	225	1484	202	-0.662937923	-0.494510087	-0.335699343	-0.334999546
DDX20_-_112298588.23-P1P2|DDX20_-_112298555.23-P1P2	DDX20	2291	46	2269	106	3963	446	4862	308	-0.595693062	-0.491680309	-0.360455008	-0.455529159
DDX21_-_70715959.23-P1P2|DDX21_+_70715930.23-P1P2	DDX21	369	56	368	20	6808	1069	8218	834	-0.294522147	-0.463826824	-0.315709392	-0.381695671
DDX23_+_49245881.23-P1P2|DDX23_+_49245865.23-P1P2	DDX23	770	48	741	35	4737	567	4588	382	-0.426756698	-0.487411946	-0.352203152	-0.412627922
DDX24_+_94547508.23-P1P2|DDX24_+_94547517.23-P1P2	DDX24	929	22	841	78	4902	328	5588	405	-0.567714021	-0.389926833	-0.430445199	-0.434468166
DDX27_-_47836019.23-P1P2|DDX27_-_47836033.23-P1P2	DDX27	741	69	940	61	3546	467	3824	351	-0.367762408	-0.442176723	-0.339278248	-0.397257028
DDX41_+_176943914.23-P1P2|DDX41_+_176943922.23-P1P2	DDX41	995	27	1003	66	3537	329	3976	328	-0.548575518	-0.440291453	-0.386042474	-0.414019151
DDX47_+_12966332.23-P1P2|DDX47_+_12966328.23-P1P2	DDX47	698	31	565	15	3412	293	3566	251	-0.475749601	-0.567259064	-0.396767356	-0.438849522
DDX52_-_36003440.23-P1P2|DDX52_-_36003249.23-P1P2	DDX52	1607	85	1576	62	4157	407	5566	429	-0.452523751	-0.516134963	-0.379206267	-0.424812002
DDX56_+_44613471.23-P1P2|DDX56_-_44613091.23-P1P2	DDX56	566	18	598	33	2481	197	2696	231	-0.522346781	-0.46421512	-0.40712048	-0.407872775
DERL2_-_5389442.23-P1P2|DERL2_+_5389484.23-P1P2	DERL2	1897	65	1709	87	7630	860	8482	691	-0.51681808	-0.478702788	-0.360378069	-0.416223027
DHODH_-_72042714.23-P1|DHODH_-_72042709.23-P1	DHODH	2497	134	2554	147	4331	569	5178	394	-0.450966321	-0.461213568	-0.339650259	-0.426803003
DHX15_+_24586128.23-P1P2|DHX15_+_24586112.23-P1P2	DHX15	785	21	664	18	4653	305	5269	386	-0.549228404	-0.565683733	-0.433189347	-0.432762489
DHX16_+_30640731.23-P1P2|DHX16_-_30640796.23-P1P2	DHX16	317	13	449	57	3033	331	3075	298	-0.481585976	-0.342990821	-0.364506944	-0.388644782
DHX29_-_54603249.23-P1P2|DHX29_-_54603482.23-P1P2	DHX29	959	86	823	97	5474	1555	6417	1237	-0.373761863	-0.354875092	-0.235820118	-0.280823011
DHX30_-_47866553.23-P1|DHX30_-_47866535.23-P1	DHX30	3490	205	3363	214	4730	445	5771	390	-0.437838159	-0.446676164	-0.384606346	-0.445459686
DHX8_-_41561378.23-P1P2|DHX8_-_41561447.23-P1P2	DHX8	196	1	156	5	1622	190	1569	202	-0.700687818	-0.522689392	-0.354698768	-0.343756539
DIEXF_-_210001741.23-P1P2|DIEXF_+_210001559.23-P1P2	DIEXF	1655	172	1563	243	6701	1988	7755	1517	-0.352531183	-0.314762057	-0.229981941	-0.278536047
DIMT1_+_61699702.23-P1P2|DIMT1_+_61699666.23-P1P2	DIMT1	1639	182	1402	238	5655	754	6751	558	-0.342688691	-0.301764621	-0.337709526	-0.41389632
DKC1_-_153991174.23-P1P2|DKC1_-_153991190.23-P1P2	DKC1	3511	133	3807	214	7504	1304	9230	800	-0.502958637	-0.46500155	-0.30206174	-0.406504617
DLD_-_107531642.23-P1P2|DLD_-_107531673.23-P1P2	DLD	931	25	894	142	3704	418	3627	376	-0.549724526	-0.311235938	-0.360066332	-0.378143137
DMAP1_-_44679204.23-P1P2|DMAP1_-_44679254.23-P1P2	DMAP1	1732	145	1595	111	7157	758	8713	649	-0.384660857	-0.432856581	-0.368751693	-0.430300766
DNAJA3_+_4475898.23-P1P2|DNAJA3_-_4475855.23-P1P2	DNAJA3	3620	118	3259	189	5991	704	7426	611	-0.525253333	-0.46030644	-0.354729048	-0.41463583
DNAJC19_+_180707414.23-P1P2|DNAJC19_+_180707491.23-P1P2	DNAJC19	1071	4	1107	5	3667	285	4101	183	-0.816848198	-0.8115338	-0.410202331	-0.510314543
DNTTIP2_-_94344536.23-P1P2|DNTTIP2_-_94344693.23-P1P2	DNTTIP2	725	116	682	131	2168	176	2268	232	-0.287790219	-0.283108388	-0.40406235	-0.380009737
DONSON_-_34960942.23-P1P2|DONSON_+_34960976.23-P1P2	DONSON	125	1	151	6	1906	452	1897	345	-0.633941244	-0.49511914	-0.259998154	-0.289713259
DSN1_+_35402097.23-P1P2|DSN1_-_35402160.23-P1P2	DSN1	944	71	832	25	4899	495	5584	392	-0.399672672	-0.55261508	-0.37501197	-0.439475529
DUT_+_48624414.23-P1P2|DUT_+_48624411.23-P1P2	DUT	1222	27	1414	31	4562	375	4866	284	-0.579238744	-0.6002435	-0.40275107	-0.468378788
DYNC1H1_-_102430947.23-P1P2|DYNC1H1_+_102430877.23-P1P2	DYNC1H1	170	13	259	9	5827	829	6459	916	-0.388932722	-0.521744871	-0.328979065	-0.329070345
DYNC1I2_+_172544557.23-P1P2|DYNC1I2_+_172544609.23-P1P2	DYNC1I2	394	25	412	31	2650	334	2651	240	-0.421517766	-0.418216003	-0.345099255	-0.39923776
DYNLRB1_-_33104256.23-P1|DYNLRB1_-_33104419.23-P1	DYNLRB1	705	32	591	16	2883	1	3332	232	-0.472642107	-0.564936552	-1.046926524	-0.440507524
ECT2_-_172468705.23-P1P2|ECT2_+_172468782.23-P1P2	ECT2	569	14	669	63	2353	261	2363	258	-0.558438925	-0.387275359	-0.362218127	-0.369819037
EEF2_-_3985443.23-P1|EEF2_+_3985431.23-P1	EEF2	644	53	681	94	3861	647	4290	519	-0.385596309	-0.331512555	-0.306872972	-0.353954734
EFR3A_+_132916562.23-P1P2|EFR3A_+_132916438.23-P1P2	EFR3A	2525	14	2272	40	8768	407	10737	299	-0.780780624	-0.633670101	-0.479815853	-0.584804093
EFTUD1_+_82554982.23-P1P2|EFTUD1_+_82555000.23-P1P2	EFTUD1	2755	157	2739	261	4459	450	4714	284	-0.442150302	-0.387123708	-0.375149788	-0.463386967
EFTUD2_+_42976772.23-P1P2|EFTUD2_+_42976714.23-P1P2	EFTUD2	222	2	207	1	1787	157	1589	128	-0.658646987	-0.726662903	-0.393327909	-0.417079426
EIF2B2_-_75469671.23-P1P2|EIF2B2_-_75469665.23-P1P2	EIF2B2	1075	25	1024	71	2986	298	3584	293	-0.571181692	-0.43271244	-0.376517589	-0.415389269
EIF2B3_+_45452243.23-P1P2|EIF2B3_+_45452232.23-P1P2	EIF2B3	1372	36	1350	21	3589	270	4485	212	-0.554891826	-0.648787967	-0.414567986	-0.501367374
EIF2B4_+_27593168.23-P1P2|EIF2B4_+_27593203.23-P1P2	EIF2B4	1073	12	915	29	4403	498	5731	515	-0.674423505	-0.545502399	-0.359809449	-0.400723029
EIF2B5_+_183853118.23-P1P2|EIF2B5_+_183853180.23-P1P2	EIF2B5	996	67	1012	51	5462	994	6831	826	-0.416209043	-0.479074688	-0.295811528	-0.354131219
EIF2S1_-_67827080.23-P1P2|EIF2S1_-_67827085.23-P1P2	EIF2S1	496	1	445	3	3252	511	3282	234	-0.838891774	-0.736955955	-0.315496585	-0.436784801
EIF3A_+_120840264.23-P1P2|EIF3A_-_120840234.23-P1P2	EIF3A	226	24	178	29	2948	477	2844	458	-0.344646459	-0.30417166	-0.311532865	-0.308930985
EIF3CL_-_28415135.23-ENST00000380876.4,ENST00000398943.3,ENST00000398944.3|EIF3CL_+_28415115.23-ENST00000380876.4,ENST00000398943.3,ENST00000398944.3	EIF3CL	183	24	120	21	3877	864	4363	590	-0.313281394	-0.292133385	-0.268485899	-0.336472803
EIF3D_-_36925159.23-P1P2|EIF3D_+_36925166.23-P1P2	EIF3D	680	45	729	80	3164	381	3561	339	-0.417654403	-0.365132466	-0.351291525	-0.391506587
EIF3E_+_109260706.23-P1P2|EIF3E_+_109260697.23-P1P2	EIF3E	303	14	235	16	2395	227	2555	312	-0.464557911	-0.428992872	-0.383343975	-0.352310557
EIF3G_-_10230368.23-P1P2|EIF3G_-_10230310.23-P1P2	EIF3G	201	14	246	4	2436	456	2650	303	-0.403510702	-0.61662186	-0.291878368	-0.362642091
EIF3H_-_117768013.23-P1P2|EIF3H_+_117768010.23-P1P2	EIF3H	1246	115	1344	86	5415	1273	5961	951	-0.369860999	-0.44490135	-0.261319703	-0.310555882
EIF3M_-_32605424.23-P1P2|EIF3M_-_32605405.23-P1P2	EIF3M	690	35	730	132	2734	279	3009	285	-0.456439896	-0.292032313	-0.373486024	-0.392225842
EIF4E_-_99850247.23-P1P2|EIF4E_+_99849961.23-P1P2	EIF4E	1467	43	1530	39	2545	231	2810	181	-0.539005914	-0.578905808	-0.389186361	-0.452574442
EIF4G1_-_184032400.23-P1P2|EIF4G1_-_184032787.23-P1P2	EIF4G1	882	123	728	46	4110	409	4540	386	-0.308350498	-0.445386923	-0.377014198	-0.409339052
EIF4G2_+_10830441.23-P1|EIF4G2_+_10830444.23-P1	EIF4G2	1058	143	1052	159	1660	316	1816	376	-0.313162978	-0.318663099	-0.289509877	-0.269351857
EIF5B_-_99953906.23-P1P2|EIF5B_-_99953921.23-P1P2	EIF5B	1303	296	1433	241	6129	1051	6640	711	-0.236128523	-0.303151259	-0.303832778	-0.373226378
EIF6_+_33872338.23-P1P2|EIF6_-_33872571.23-P1P2	EIF6	908	12	875	20	5366	407	5899	338	-0.649512346	-0.591624985	-0.413619924	-0.471362302
ELP4_+_31531362.23-P1P2|ELP4_-_31531374.23-P1P2	ELP4	2961	658	3072	777	7164	2637	8353	2253	-0.239628754	-0.243196304	-0.200914065	-0.228027717
EMG1_-_7080134.23-P1P2|EMG1_+_7080302.23-P1P2	EMG1	959	51	964	105	3285	390	3503	205	-0.450625608	-0.366624477	-0.353210311	-0.467755842
EP400_+_132434542.23-P1P2|EP400_-_132434629.23-P1P2	EP400	934	22	1172	86	3286	277	4075	285	-0.568514813	-0.424675617	-0.39924047	-0.439923832
ERCC2_+_45873806.23-P1P2|ERCC2_+_45873802.23-P1P2	ERCC2	3704	103	3331	80	4680	510	5526	347	-0.54880027	-0.589560748	-0.3648299	-0.456965315
ERH_+_69864980.23-P1P2|ERH_-_69864782.23-P1P2	ERH	115	1	169	22	2069	489	2355	377	-0.621591459	-0.335821639	-0.260470605	-0.309805446
ESF1_+_13765535.23-P1|ESF1_+_13765524.23-P1	ESF1	1781	49	1493	31	6936	536	7648	348	-0.54886314	-0.608274042	-0.41117535	-0.507634323
ESPL1_-_53662296.23-P1P2|ESPL1_-_53662083.23-P1P2	ESPL1	451	65	510	37	2525	570	2578	315	-0.302523534	-0.424287109	-0.266686948	-0.352219176
EXOC4_+_132937814.23-P1P2|EXOC4_-_132937863.23-P1P2	EXOC4	1433	13	1450	19	4223	529	4420	285	-0.706528663	-0.673431755	-0.346056442	-0.452706676
EXOSC2_-_133569408.23-P1P2|EXOSC2_+_133569139.23-P1P2	EXOSC2	902	12	964	26	4143	422	4246	261	-0.648523287	-0.568779493	-0.373883439	-0.460178836
EXOSC3_+_37785000.23-P1P2|EXOSC3_-_37785046.23-P1P2	EXOSC3	1243	93	1256	124	4609	694	5910	639	-0.400908325	-0.381329392	-0.321302825	-0.37167862
EXOSC4_-_145133639.23-P1P2|EXOSC4_+_145133666.23-P1P2	EXOSC4	825	7	871	49	5569	355	6828	397	-0.707721581	-0.462717044	-0.437008088	-0.469124159
EXOSC5_+_41903223.23-P1P2|EXOSC5_-_41903252.23-P1P2	EXOSC5	611	15	476	8	6266	677	7377	580	-0.559418255	-0.627019536	-0.366044502	-0.421772547
EXOSC6_-_70285645.23-P1P2|EXOSC6_+_70285829.23-P1P2	EXOSC6	1692	153	1446	200	5315	1064	6416	1088	-0.373206233	-0.331924973	-0.282966919	-0.30097378
FARSB_-_223520722.23-P1P2|FARSB_-_223520739.23-P1P2	FARSB	751	48	732	55	1603	160	2016	116	-0.423030177	-0.420297611	-0.376149524	-0.469865342
FBL_-_40336975.23-P1P2|FBL_+_40336946.23-P1P2	FBL	166	2	122	1	3854	443	4265	375	-0.615459036	-0.649006632	-0.357603517	-0.404047321
FCF1_-_75179927.23-P1P2|FCF1_+_75179898.23-P1P2	FCF1	187	2	203	4	2188	277	2093	204	-0.633148949	-0.588349126	-0.344427432	-0.387524554
FDPS_+_155278669.23-P1P2|FDPS_-_155278687.23-P1P2	FDPS	355	16	324	25	2962	399	3207	250	-0.469447525	-0.413488361	-0.336191129	-0.422786195
FH_-_241683023.23-P1P2|FH_-_241682625.23-P1P2	FH	3136	208	3034	314	6239	1035	7510	1127	-0.419710474	-0.375006455	-0.308297232	-0.320204195
FIP1L1_+_54243867.23-P1P2|FIP1L1_+_54244179.23-P1P2	FIP1L1	679	3	723	8	2206	147	2309	78	-0.782192902	-0.688699908	-0.430530459	-0.552991377
FTSJ3_+_61904432.23-P1P2|FTSJ3_+_61904393.23-P1P2	FTSJ3	857	18	850	27	3991	422	4575	471	-0.584213129	-0.54482076	-0.368844907	-0.379308923
GART_+_34914420.23-P1P2|GART_+_34914375.23-P1P2	GART	1888	25	1581	22	6353	612	7528	551	-0.65523393	-0.6655494	-0.381492006	-0.433015553
GATA1_+_48644988.23-P1P2|GATA1_-_48645022.23-P1P2	GATA1	159	1	142	1	1417	61	1452	58	-0.669619109	-0.671276799	-0.488196623	-0.525977151
GBF1_-_104005325.23-P1P2|GBF1_+_104005335.23-P1P2	GBF1	589	165	582	95	1920	211	1991	176	-0.204567724	-0.306780716	-0.363362589	-0.402773274
GEMIN2_-_39583560.23-P1P2|GEMIN2_-_39583572.23-P1P2	GEMIN2	3519	105	3732	184	8149	957	9299	578	-0.538305565	-0.484275466	-0.354856155	-0.458738277
GEMIN5_+_154317734.23-P1P2|GEMIN5_+_154317730.23-P1P2	GEMIN5	2139	8	2263	8	5247	179	5835	275	-0.832304615	-0.857225764	-0.520930586	-0.50199283
GFER_-_2034253.23-P1P2|GFER_-_2034422.23-P1P2	GFER	4189	342	3875	340	6671	1108	7897	982	-0.388950545	-0.399438027	-0.308141895	-0.349755571
GFM1_-_158362387.23-P1P2|GFM1_+_158362390.23-P1P2	GFM1	3397	365	3454	459	7792	1353	9436	997	-0.347967163	-0.338193664	-0.302169106	-0.375381802
GINS1_-_25388381.23-P1P2|GINS1_+_25388562.23-P1P2	GINS1	457	2	515	8	2266	116	2214	87	-0.766131862	-0.638636524	-0.465837599	-0.529410458
GIT2_-_110433753.23-P1P2|GIT2_+_110433842.23-P1P2	GIT2	704	113	765	119	1270	306	1177	172	-0.287285914	-0.314149611	-0.257748769	-0.323721934
GNE_+_36258410.23-P1P2|GNE_-_36258191.23-P1P2	GNE	4013	858	3882	619	5734	1127	6525	783	-0.245435101	-0.311334201	-0.285447175	-0.35532257
GNL2_+_38061508.23-P1P2|GNL2_+_38061333.23-P1P2	GNL2	1160	60	1069	160	5938	655	6997	554	-0.455176751	-0.320109469	-0.363243988	-0.420656219
GNL3L_+_54556690.23-P1P2|GNL3L_+_54556706.23-P1P2	GNL3L	1272	283	1136	236	3953	944	4397	559	-0.239219677	-0.271932737	-0.259176168	-0.346170492
GNPAT_-_231376974.23-P1P2|GNPAT_+_231377015.23-P1P2	GNPAT	1583	61	1314	133	5337	867	6347	508	-0.499146253	-0.377720093	-0.311101936	-0.4189312
GOLT1B_+_21654765.23-P1P2|GOLT1B_+_21654809.23-P1P2	GOLT1B	620	15	813	12	3352	556	3769	347	-0.561598546	-0.651663472	-0.308220711	-0.396776429
GPN2_-_27216692.23-P1P2|GPN2_-_27216715.23-P1P2	GPN2	1697	176	1757	176	2271	363	2795	311	-0.352857939	-0.379498363	-0.313103817	-0.366933584
GPN3_-_110906004.23-P1P2|GPN3_+_110906029.23-P1P2	GPN3	868	11	807	59	3368	688	3667	396	-0.654745586	-0.424499089	-0.280187187	-0.371735798
GTF2B_-_89357167.23-P1P2|GTF2B_-_89357171.23-P1P2	GTF2B	1344	98	1307	106	1348	203	1400	111	-0.404826743	-0.410191604	-0.320888565	-0.419402492
GTF2E1_-_120461818.23-P1P2|GTF2E1_+_120461660.23-P1P2	GTF2E1	2332	273	2480	359	7999	2972	9714	2237	-0.335044618	-0.325475732	-0.199657841	-0.252894056
GTF2H4_-_30876180.23-P1P2|GTF2H4_-_30876185.23-P1P2	GTF2H4	3219	364	3095	263	4138	334	4499	363	-0.340340043	-0.404055928	-0.405168935	-0.41755171
GUCD1_-_24951865.23-P1P2|GUCD1_-_24951897.23-P1P2	GUCD1	468	12	360	55	4607	758	5056	698	-0.550682908	-0.315603517	-0.309367036	-0.333255393
HARS_+_140070923.23-P1P2|HARS_+_140070910.23-P1P2	HARS	1144	24	846	11	3550	176	3864	122	-0.586321759	-0.669369455	-0.470529201	-0.564315456
HAUS1_-_43684365.23-P1P2|HAUS1_+_43684369.23-P1P2	HAUS1	1318	56	1267	87	2510	238	2679	199	-0.484361422	-0.434497708	-0.38331195	-0.430228531
HAUS4_-_23426310.23-P1P2|HAUS4_+_23426073.23-P1P2	HAUS4	968	1	876	26	4629	498	5054	298	-0.938607179	-0.554645056	-0.3665569	-0.466796973
HAUS5_-_36103661.23-P1P2|HAUS5_-_36103753.23-P1P2	HAUS5	1086	50	984	52	3026	395	3267	196	-0.472081095	-0.472115746	-0.340427542	-0.463814066
HAUS7_+_152736011.23-P1|HAUS7_+_152735963.23-P1	HAUS7	1998	38	1948	26	6705	768	7260	698	-0.603131784	-0.672686587	-0.358192088	-0.390167768
HBS1L_-_135376018.23-P1P2|HBS1L_+_135375911.23-P1P2	HBS1L	1199	101	1036	155	6023	2222	6911	1688	-0.383331868	-0.320142231	-0.200604877	-0.243617059
HCCS_-_11129472.23-P1P2|HCCS_-_11129457.23-P1P2	HCCS	3438	1105	3274	1091	6829	2171	8325	1824	-0.184599402	-0.202491011	-0.220665405	-0.260715554
HEATR1_-_236767868.23-P1P2|HEATR1_+_236767776.23-P1P2	HEATR1	1116	29	897	38	4473	291	5257	350	-0.555394966	-0.503786848	-0.434185359	-0.447765076
HINFP_-_118992311.23-P1P2|HINFP_-_118992315.23-P1P2	HINFP	876	45	777	53	2589	227	2972	268	-0.455431012	-0.434480437	-0.393841563	-0.399921038
HJURP_+_234762977.23-P1P2|HJURP_+_234763174.23-P1P2	HJURP	2846	11	2907	14	8357	647	9532	432	-0.831972751	-0.818720407	-0.410967327	-0.508345246
HMGCS1_-_43313473.23-P1P2|HMGCS1_-_43313515.23-P1P2	HMGCS1	732	25	683	22	1640	90	1672	141	-0.513853226	-0.541606637	-0.456151705	-0.409979187
HSD17B10_-_53461314.23-P1P2|HSD17B10_+_53461288.23-P1P2	HSD17B10	218	1	271	23	4490	265	5675	229	-0.716498919	-0.39900518	-0.447270741	-0.526303529
HSD17B12_+_43702645.23-P1P2|HSD17B12_+_43702292.23-P1P2	HSD17B12	3549	191	3476	206	4431	575	4817	510	-0.450852309	-0.457165022	-0.341315469	-0.374926252
HSPA9_-_137911079.23-P1P2|HSPA9_-_137911031.23-P1P2	HSPA9	448	2	432	11	2710	209	2981	247	-0.763167871	-0.570189645	-0.41108619	-0.413184599
HSPE1_-_198365117.23-P1P2|HSPE1_+_198365089.23-P1P2	HSPE1	890	24	960	12	3910	350	4660	191	-0.54886314	-0.676203189	-0.391238594	-0.523718193
HSPE1-MOB4_-_198365117.23-P1P2|HSPE1-MOB4_+_198365089.23-P1P2	HSPE1-MOB4	890	24	960	12	3910	350	4660	191	-0.54886314	-0.676203189	-0.391238594	-0.523718193
IARS2_-_220267547.23-P1P2|IARS2_-_220267478.23-P1P2	IARS2	286	5	286	18	2715	319	3348	292	-0.592809205	-0.441472298	-0.354541872	-0.405211815
ICT1_-_73008809.23-P1P2|ICT1_-_73008831.23-P1P2	ICT1	3872	1491	3516	1725	4176	2555	5568	2162	-0.157639385	-0.145358923	-0.132414735	-0.170710923
IK_-_140027683.23-P1|IK_-_140027453.23-P1	IK	309	42	361	89	3178	962	3449	670	-0.310191734	-0.245879407	-0.227217165	-0.279525216
IMMT_-_86422566.23-P1P2|IMMT_-_86422569.23-P1P2	IMMT	1729	139	1900	225	4325	906	4901	646	-0.390669338	-0.354933819	-0.276833417	-0.340519891
IMP3_+_75932082.23-P1P2|IMP3_+_75932526.23-P1P2	IMP3	1053	78	1101	154	4045	1035	4277	457	-0.402119141	-0.330079336	-0.249881371	-0.373451638
IMP4_+_131100464.23-P1P2|IMP4_-_131100490.23-P1P2	IMP4	118	11	114	10	2512	253	2725	230	-0.357810327	-0.387074657	-0.375212021	-0.410235043
IMPDH2_+_49066798.23-P1P2|IMPDH2_+_49066801.23-P1P2	IMPDH2	1663	52	1799	87	6922	805	8387	528	-0.529928754	-0.486284815	-0.356149903	-0.456709026
INCENP_+_61891506.23-P1P2|INCENP_+_61891519.23-P1P2	INCENP	425	1	410	28	1686	369	1727	222	-0.815869784	-0.43204957	-0.270758986	-0.344059121
INTS2_-_60005353.23-P1P2|INTS2_-_60004971.23-P1P2	INTS2	744	1	592	8	1758	59	1968	62	-0.899346699	-0.659196056	-0.521673601	-0.563468049
INTS3_+_153700546.23-P1P2|INTS3_+_153700541.23-P1P2	INTS3	2388	43	2287	165	4636	236	5272	220	-0.611734163	-0.427932595	-0.467148703	-0.520996757
INTS4_-_77705700.23-P1P2|INTS4_+_77705685.23-P1P2	INTS4	1522	78	1259	128	6754	786	7535	466	-0.457092337	-0.377025715	-0.356054073	-0.459469907
INTS8_+_95835564.23-P1P2|INTS8_+_95835490.23-P1P2	INTS8	720	45	692	63	4976	658	5834	395	-0.426178674	-0.392264525	-0.338802278	-0.445168469
IPO13_-_44412643.23-P1P2|IPO13_-_44412713.23-P1P2	IPO13	985	1	954	10	3602	148	3686	207	-0.941204589	-0.699970853	-0.495707736	-0.474244986
KANSL2_+_49076009.23-P1P2|KANSL2_+_49075987.23-P1P2	KANSL2	1142	9	1257	124	3756	256	4030	174	-0.722906221	-0.381446941	-0.427850393	-0.515457524
KANSL3_+_97304019.23-P1P2|KANSL3_+_97304003.23-P1P2	KANSL3	3533	499	3428	446	8826	1240	10869	1150	-0.307235459	-0.341314691	-0.330717611	-0.375182851
KCTD10_-_109915112.23-P1P2|KCTD10_+_109915092.23-P1P2	KCTD10	201	7	223	90	2074	645	2187	350	-0.497391716	-0.173294109	-0.223529311	-0.309825991
KIF11_-_94352971.23-P1P2|KIF11_-_94353041.23-P1P2	KIF11	112	50	92	5	1051	319	981	257	-0.133990281	-0.445285505	-0.226658809	-0.232212268
KIF23_+_69707149.23-P1P2|KIF23_+_69706676.23-P1P2	KIF23	379	11	435	20	1906	413	2074	262	-0.53120969	-0.488489459	-0.272136498	-0.346893257
KRR1_+_75905342.23-P1P2|KRR1_+_75905291.23-P1P2	KRR1	1323	42	1201	33	3539	334	3854	388	-0.527020202	-0.56716686	-0.384091095	-0.382761542
LEO1_+_52263963.23-P1P2|LEO1_+_52263938.23-P1P2	LEO1	1542	113	1768	153	8963	1343	10062	1073	-0.404267581	-0.400996108	-0.322043726	-0.373939924
LIN52_-_74551706.23-P1P2|LIN52_+_74551686.23-P1P2	LIN52	516	22	517	47	2301	248	2450	164	-0.480025985	-0.391765984	-0.366068088	-0.44644134
LONP1_+_5720108.23-P1P2|LONP1_+_5720103.23-P1P2	LONP1	2206	154	2444	51	6354	592	7177	416	-0.411836336	-0.60932062	-0.385985652	-0.469628917
LRPPRC_+_44223082.23-P1P2|LRPPRC_-_44223078.23-P1P2	LRPPRC	2164	183	2032	243	3626	667	4498	435	-0.383352159	-0.353529445	-0.294309822	-0.389120923
LSM2_-_31774578.23-P1P2|LSM2_-_31774687.23-P1P2	LSM2	742	37	688	29	3978	221	4588	277	-0.459201179	-0.503407766	-0.455330157	-0.463037901
LSM4_+_18433820.23-P1P2|LSM4_+_18433795.23-P1P2	LSM4	773	57	762	33	3231	265	3323	157	-0.402153339	-0.499986334	-0.402914711	-0.501195033
LSM6_-_147096913.23-P1P2|LSM6_+_147096955.23-P1P2	LSM6					244	5	296	5			-0.566348953	-0.635811468
LSM7_+_2328561.23-P1P2|LSM7_-_2328534.23-P1P2	LSM7	1711	120	1575	269	6601	1156	7338	1171	-0.410889881	-0.30092484	-0.301006788	-0.310539309
LTV1_+_144164581.23-P1P2|LTV1_+_144164541.23-P1P2	LTV1	952	128	801	119	3309	352	3630	410	-0.313840336	-0.320938325	-0.367976587	-0.364688241
MAK16_-_33342733.23-P1P2|MAK16_+_33342750.23-P1P2	MAK16	1302	103	1311	62	4995	599	5835	408	-0.392730243	-0.488940809	-0.351962377	-0.440113596
MCM10_-_13203599.23-P1P2|MCM10_-_13203591.23-P1P2	MCM10	365	5	313	2	1339	167	1512	155	-0.629123171	-0.727607425	-0.34616432	-0.379370621
MCM2_-_127317301.23-P1P2|MCM2_-_127317286.23-P1P2	MCM2	2381	27	2172	22	5992	265	6428	287	-0.678798683	-0.712469336	-0.48617183	-0.510522156
MCM3_-_52149354.23-P1P2|MCM3_-_52149307.23-P1P2	MCM3	2251	28	2431	68	9371	928	11213	754	-0.665176254	-0.566720622	-0.377837833	-0.446424761
MCM4_+_48873564.23-P1P2|MCM4_-_48873574.23-P1P2	MCM4					6914	1415	8172	1053			-0.280015546	-0.344168528
MCM6_+_136633947.23-P1P2|MCM6_+_136633964.23-P1P2	MCM6	2809	128	2222	123	3648	425	4486	341	-0.475333298	-0.466791613	-0.355778895	-0.426904852
MDN1_-_90529439.23-P1P2|MDN1_+_90529477.23-P1P2	MDN1	2222	118	1963	266	4748	947	5576	1047	-0.452387885	-0.33510999	-0.283450762	-0.284938396
MED1_-_37607477.23-P1P2|MED1_-_37607464.23-P1P2	MED1	1114	70	1117	52	3171	455	3618	268	-0.426467223	-0.490837524	-0.327714523	-0.430855787
MED12_+_70338552.23-P1P2|MED12_-_70338823.23-P1P2	MED12	790	3	731	18	3864	422	4526	201	-0.804774988	-0.579873211	-0.36448572	-0.511140965
MED14_+_40594762.23-P1P2|MED14_+_40594765.23-P1P2	MED14	1623	74	1501	86	4127	353	4589	199	-0.474442	-0.461220883	-0.397371968	-0.514880784
MED17_-_93517476.23-P1P2|MED17_-_93517872.23-P1P2	MED17	816	103	764	52	1952	397	2014	224	-0.323017086	-0.434752633	-0.280664483	-0.366828514
MED18_-_28655606.23-P1P2|MED18_-_28655598.23-P1P2	MED18	1386	101	1548	239	3709	967	4332	637	-0.404960583	-0.315780845	-0.247345663	-0.323312153
MED19_+_57479662.23-P1P2|MED19_+_57479647.23-P1P2	MED19	947	47	1039	37	3992	271	4381	233	-0.460701164	-0.529326897	-0.428416156	-0.482883706
MED21_-_27175714.23-P1P2|MED21_-_27175694.23-P1P2	MED21	1182	74	1096	70	4205	554	4668	467	-0.427122998	-0.444814642	-0.339266124	-0.383813271
MED22_+_136214930.23-P1P2|MED22_+_136214779.23-P1P2	MED22	888	29	962	59	6040	344	3785	1	-0.521298293	-0.450439714	-0.452184811	-1.209105042
MED30_-_118533205.23-P1P2|MED30_+_118533025.23-P1P2	MED30	851	25	692	1	2564	35	2800	38	-0.536321159	-0.904559607	-0.641409016	-0.694368439
MED31_-_6554743.23-P1P2|MED31_-_6554548.23-P1P2	MED31	1156	136	1148	149	3472	1829	4169	1495	-0.33382335	-0.341099858	-0.15257917	-0.183203026
MED6_+_71067331.23-P1P2|MED6_+_71067347.23-P1P2	MED6	761	36	750	12	3206	487	3663	299	-0.466955106	-0.639756106	-0.320049501	-0.415640091
MED7_-_156569591.23-P1P2|MED7_-_156569448.23-P1P2	MED7	435	3	495	14	1938	139	1983	78	-0.715815406	-0.557284419	-0.420567517	-0.529056718
MED9_-_17380394.23-P1P2|MED9_+_17380324.23-P1P2	MED9	880	60	840	110	5191	784	5788	641	-0.413959976	-0.339481183	-0.32091441	-0.367906597
METTL16_+_2415104.23-P1P2|METTL16_+_2415051.23-P1P2	METTL16	3292	180	3399	178	2857	265	3175	209	-0.448440311	-0.475337446	-0.386333283	-0.449267635
METTL17_-_21458170.23-P1P2|METTL17_-_21458167.23-P1P2	METTL17	2346	513	2436	453	5112	824	5802	690	-0.24198448	-0.288538142	-0.312146015	-0.356714924
MFAP1_+_44116853.23-P1P2|MFAP1_-_44116904.23-P1P2	MFAP1	62	1	57	1	1996	158	2132	202	-0.530421576	-0.537886395	-0.407382619	-0.391970215
MINOS1_+_19923571.23-P1P2|MINOS1_-_19923558.23-P1P2	MINOS1	4209	337	4360	515	9535	1648	10989	1266	-0.391854822	-0.355635885	-0.302808523	-0.361803434
MINOS1-NBL1_+_19923571.23-P1P2|MINOS1-NBL1_-_19923558.23-P1P2	MINOS1-NBL1	4209	337	4360	515	9535	1648	10989	1266	-0.391854822	-0.355635885	-0.302808523	-0.361803434
MIS12_+_5389906.23-P1P2|MIS12_+_5389910.23-P1P2	MIS12	2369	183	2053	303	4804	760	5587	585	-0.396863549	-0.322549505	-0.314656676	-0.376705997
MIS18A_+_33651127.23-P1P2|MIS18A_+_33651321.23-P1P2	MIS18A	2664	35	2856	55	6807	463	8003	463	-0.658031813	-0.621385309	-0.428345111	-0.469962813
MIS18BP1_+_45722381.23-P1P2|MIS18BP1_+_45722332.23-P1P2	MIS18BP1	1856	28	2235	63	4703	424	5709	424	-0.636373665	-0.565419538	-0.390337539	-0.43064237
MKI67IP_+_122494437.23-P1P2|MKI67IP_+_122494255.23-P1P2	MKI67IP	974	21	1014	52	3993	358	4319	388	-0.581409864	-0.476550592	-0.39103149	-0.400678712
MMS22L_+_97730632.23-P1P2|MMS22L_-_97730942.23-P1P2	MMS22L	1305	82	1345	162	2673	378	3012	413	-0.426759032	-0.352205406	-0.329625053	-0.334191116
MNAT1_+_61201445.23-P1P2|MNAT1_-_61201528.23-P1P2	MNAT1	1882	88	2022	90	2575	259	2892	160	-0.470980989	-0.498593871	-0.375402563	-0.476386943
MRP63_+_21750803.23-P1P2|MRP63_-_21750808.23-P1P2	MRP63	2629	267	2376	342	5494	785	6816	599	-0.356247453	-0.326296275	-0.328390338	-0.404267951
MRPL10_-_45908914.23-P1P2|MRPL10_-_45908834.23-P1P2	MRPL10	3312	185	3124	230	6142	1220	6771	943	-0.445274966	-0.4251723	-0.284031639	-0.331925599
MRPL13_+_121457360.23-P1P2|MRPL13_+_121457352.23-P1P2	MRPL13	2021	265	1794	267	4026	689	4856	504	-0.318103245	-0.321257086	-0.304046314	-0.37805286
MRPL16_-_59578202.23-P1P2|MRPL16_+_59578187.23-P1P2	MRPL16	1544	240	1800	389	5195	1521	6620	1246	-0.292659864	-0.266295325	-0.231746863	-0.284582574
MRPL17_+_6704492.23-P1P2|MRPL17_-_6704339.23-P1P2	MRPL17	1509	9	1519	43	3026	358	3772	352	-0.764492468	-0.563751456	-0.353653391	-0.394657203
MRPL18_-_160211509.23-P1P2|MRPL18_-_160211527.23-P1P2	MRPL18	1621	92	1614	113	5314	824	5947	642	-0.442131655	-0.431989616	-0.317370283	-0.371924596
MRPL19_+_75874011.23-P1P2|MRPL19_+_75874356.23-P1P2	MRPL19	1712	62	1706	120	5523	910	7315	653	-0.508449483	-0.43137032	-0.309200815	-0.401824108
MRPL21_+_68671245.23-P1P2|MRPL21_-_68671264.23-P1P2	MRPL21	283	62	366	87	1696	428	1913	404	-0.240068291	-0.251228981	-0.251607044	-0.266262983
MRPL22_-_154320698.23-P1P2|MRPL22_-_154320643.23-P1P2	MRPL22	2361	43	2379	62	4074	478	4906	421	-0.610036659	-0.576972966	-0.354856155	-0.407912858
MRPL3_+_131221797.23-P1P2|MRPL3_+_131221782.23-P1P2	MRPL3	3393	315	3199	405	4449	874	5421	717	-0.369729048	-0.345318698	-0.285486801	-0.340000425
MRPL33_-_27994638.23-P1P2|MRPL33_+_27994628.23-P1P2	MRPL33	2076	176	2079	233	4510	771	5238	763	-0.382947458	-0.363093577	-0.304208681	-0.324828948
MRPL34_-_17416686.23-P1P2|MRPL34_+_17416659.23-P1P2	MRPL34	256	10	218	27	5732	891	6821	676	-0.485795593	-0.344182618	-0.317049815	-0.385387301
MRPL35_+_86426814.23-P1P2|MRPL35_-_86426601.23-P1P2	MRPL35	871	4	303	4	4473	1028	4866	693	-0.786009185	-0.647314512	-0.26435333	-0.328359841
MRPL36_+_1799909.23-P1P2|MRPL36_+_1799899.23-P1P2	MRPL36	1504	148	1512	207	7244	1679	8937	957	-0.360556082	-0.333457661	-0.26325073	-0.37327034
MRPL37_-_54665902.23-P1P2|MRPL37_-_54665919.23-P1P2	MRPL37	1882	184	1618	214	5234	1096	6493	959	-0.361700654	-0.338574246	-0.276905081	-0.322686544
MRPL39_+_26979780.23-P1P2|MRPL39_+_26979728.23-P1P2	MRPL39	1714	11	1670	57	3527	522	4035	331	-0.756275658	-0.536916521	-0.32357253	-0.414907913
MRPL41_-_140446382.23-P1P2|MRPL41_-_140446416.23-P1P2	MRPL41	1829	51	1670	63					-0.546975229	-0.522365393
MRPL43_+_102747000.23-P1P2|MRPL43_-_102747237.23-P1P2	MRPL43	1520	118	1580	102	3532	1398	4509	1046	-0.39571213	-0.443843375	-0.191098705	-0.251679447
MRPL46_+_89010571.23-P1P2|MRPL46_+_89010587.23-P1P2	MRPL46	2353	258	2235	251	6049	884	7175	583	-0.344791182	-0.362829382	-0.325368611	-0.416594782
MRPL51_+_6602410.23-P1P2|MRPL51_-_6602409.23-P1P2	MRPL51	2140	115	2068	137	6273	797	7624	577	-0.450588052	-0.440367181	-0.344222732	-0.427767773
MRPL55_-_228296929.23-P1P2|MRPL55_-_228296953.23-P1P2	MRPL55	2215	255	2176	221	4645	958	5167	729	-0.337508764	-0.377612709	-0.278938766	-0.329844301
MRPS11_-_89010934.23-P1P2|MRPS11_-_89010986.23-P1P2	MRPS11	2930	59	2781	108	4390	865	5252	750	-0.595950223	-0.519007438	-0.285081211	-0.327948889
MRPS12_+_39421616.23-P1P2|MRPS12_-_39421628.23-P1P2	MRPS12	1697	140	1732	285	1211	166	1480	218	-0.386818001	-0.306452338	-0.333432528	-0.322639411
MRPS14_+_174992540.23-P1P2|MRPS14_-_174992444.23-P1P2	MRPS14	1371	258	1461	263	3154	639	3207	482	-0.264166561	-0.29314792	-0.281285472	-0.319805189
MRPS17_-_56019620.23-P1P2|MRPS17_-_56019638.23-P1P2	MRPS17	2931	232	2860	302	5536	1009	6286	865	-0.393382582	-0.372020494	-0.295608186	-0.33380233
MRPS2_+_138392554.23-P1P2|MRPS2_-_138392571.23-P1P2	MRPS2	1169	91	1140	75	7630	1154	9519	1163	-0.39496101	-0.440568215	-0.320769872	-0.35255235
MRPS21_-_150266318.23-P1P2|MRPS21_-_150266323.23-P1P2	MRPS21	1256	160	1304	66	4069	655	5101	505	-0.32209571	-0.479050729	-0.312291536	-0.385483985
MRPS23_+_55927379.23-P1P2|MRPS23_+_55927367.23-P1P2	MRPS23	2088	116	2201	216	3176	389	3860	341	-0.445634012	-0.382667801	-0.349007235	-0.403265088
MRPS25_+_15106771.23-P1P2|MRPS25_-_15106759.23-P1P2	MRPS25	2312	426	2189	289	6816	1892	8279	2026	-0.267499978	-0.338995521	-0.238945881	-0.243328159
MRPS27_+_71616011.23-P1P2|MRPS27_+_71615999.23-P1P2	MRPS27	2599	157	2864	218	5628	665	6728	557	-0.433447998	-0.420217478	-0.353975974	-0.413641181
MRPS33_+_140714704.23-P1P2|MRPS33_-_140714768.23-P1P2	MRPS33	2549	64	2425	67	4338	547	4681	331	-0.563199401	-0.568513444	-0.34517506	-0.438266557
MRPS35_+_27863749.23-P1P2|MRPS35_-_27863821.23-P1P2	MRPS35	3239	124	3079	134	5334	612	6463	361	-0.501302931	-0.502427178	-0.357924079	-0.475398052
MRPS5_+_95787523.23-P1P2|MRPS5_-_95787353.23-P1P2	MRPS5	1884	219	2033	143	5922	847	7306	650	-0.335981531	-0.431554219	-0.328266381	-0.402353795
MRPS9_-_105654578.23-P1P2|MRPS9_-_105654556.23-P1P2	MRPS9	2916	70	2706	134	4633	406	5515	322	-0.570094726	-0.483345676	-0.394151	-0.46838069
MTHFD1_-_64855062.23-P1P2|MTHFD1_-_64855112.23-P1P2	MTHFD1	2230	66	2279	67	3212	299	3775	208	-0.53871409	-0.559338677	-0.385901396	-0.477243016
MTOR_+_11322547.23-P1P2|MTOR_+_11322541.23-P1P2	MTOR	1769	56	1973	72	4843	396	5142	217	-0.528285314	-0.527548354	-0.403480964	-0.5192197
MTPAP_-_30638029.23-P1P2|MTPAP_-_30638037.23-P1P2	MTPAP	1479	73	1346	143	4862	674	5675	467	-0.462579771	-0.37063518	-0.332443509	-0.414539661
MYBBP1A_-_4458722.23-P1P2|MYBBP1A_+_4458615.23-P1P2	MYBBP1A	1724	8	1522	9	7025	554	8360	414	-0.800108503	-0.783049421	-0.408448809	-0.494386783
MYBL2_+_42295803.23-P1P2|MYBL2_-_42295783.23-P1P2	MYBL2	788	28	812	59	3121	467	3545	413	-0.508539647	-0.42541098	-0.32206995	-0.359817274
MZT1_-_73301757.23-P1P2|MZT1_+_73301789.23-P1P2	MZT1	209	6	227	37	4856	607	5177	366	-0.523134896	-0.304995156	-0.34637202	-0.438339971
NAA38_+_117824200.23-P1P2|NAA38_-_117824430.23-P1P2	NAA38	842	12	797	1	4780	284	5112	239	-0.638254824	-0.925413438	-0.446405321	-0.503173201
NARS_+_55288999.23-P1P2|NARS_+_55288993.23-P1P2	NARS	716	39	711	51	1378	311	1351	184	-0.446220881	-0.426955321	-0.266566624	-0.334845421
NBAS_+_15701228.23-P1P2|NBAS_-_15701467.23-P1P2	NBAS	1924	29	1709	42	7026	582	8271	354	-0.636681639	-0.584560049	-0.401831726	-0.517271515
NCAPD2_+_6603301.23-P1P2|NCAPD2_-_6603320.23-P1P2	NCAPD2	466	181	536	176	4232	604	4839	400	-0.15590855	-0.204197023	-0.328498299	-0.413780528
NCAPH_-_97001726.23-P1P2|NCAPH_+_97001557.23-P1P2	NCAPH	1349	34	1468	34	6047	441	7409	329	-0.56066803	-0.59253339	-0.418934413	-0.511447127
NCBP2_-_196669400.23-P1P2|NCBP2_+_196669328.23-P1P2	NCBP2	555	34	550	75	3381	570	3621	481	-0.428183287	-0.332968362	-0.306034801	-0.339227484
NCL_-_232329157.23-P1|NCL_-_232329175.23-P1	NCL	2473	126	2377	265	5259	769	6243	551	-0.458647784	-0.363938605	-0.325270169	-0.403573054
NDC80_-_2571946.23-P1P2|NDC80_-_2571927.23-P1P2	NDC80	356	38	418	82	1348	234	1226	172	-0.345856164	-0.27946283	-0.301814584	-0.33013368
NDNL2_-_29561992.23-P1P2|NDNL2_-_29561941.23-P1P2	NDNL2	2399	62	2675	22	4764	540	5469	269	-0.55881276	-0.743246994	-0.359535895	-0.495261075
NDUFAF5_+_13765753.23-P1P2|NDUFAF5_+_13766054.23-P1P2	NDUFAF5	988	29	869	72	4358	390	5295	255	-0.537218283	-0.406438243	-0.391309818	-0.498552011
NEDD1_-_97301092.23-P1P2|NEDD1_+_97301093.23-P1P2	NEDD1	1118	1	857	22	2927	164	3240	89	-0.960102155	-0.575108822	-0.453984671	-0.585758424
NEDD8_+_24701514.23-P1P2|NEDD8_+_24701539.23-P1P2	NEDD8	3700	64	3407	73	15334	1129	18257	706	-0.618832723	-0.606254762	-0.417821668	-0.533447029
NIP7_-_69373724.23-P1P2|NIP7_+_69373427.23-P1P2	NIP7	755	26	860	63	4292	641	4760	452	-0.512830996	-0.424350374	-0.322392461	-0.392008311
NKAP_-_119077682.23-P1P2|NKAP_+_119077637.23-P1P2	NKAP	505	83	495	95	2307	429	1990	284	-0.283361144	-0.282891806	-0.292756357	-0.327752883
NLE1_-_33469053.23-P1P2|NLE1_+_33469287.23-P1P2	NLE1	1250	60	1154	39	4708	610	5108	343	-0.46632725	-0.537247875	-0.341535962	-0.446411669
NMD3_+_160939115.23-P1P2|NMD3_-_160939520.23-P1P2	NMD3	1297	26	1242	157	6113	486	7176	473	-0.593558971	-0.345043038	-0.407325349	-0.449449999
NOC3L_-_96122495.23-P1P2|NOC3L_+_96122658.23-P1P2	NOC3L	2202	66	1971	152	6403	629	7050	469	-0.536827856	-0.41801703	-0.378860554	-0.447996702
NOL11_-_65714052.23-P1P2|NOL11_-_65714041.23-P1P2	NOL11	1086	53	1047	51	4472	516	4934	348	-0.46354464	-0.484095646	-0.357127564	-0.438689823
NOL6_-_33473848.23-P1P2|NOL6_+_33473861.23-P1P2	NOL6	862	5	679	15	2704	212	2932	131	-0.757230512	-0.594383315	-0.408874917	-0.509792996
NOP10_+_34635309.23-P1P2|NOP10_+_34635306.23-P1P2	NOP10	7387	348	7323	440	11060	989	13233	1067	-0.471063915	-0.455488878	-0.391604471	-0.41791714
NOP16_+_175815576.23-P1P2|NOP16_+_175815510.23-P1P2	NOP16	1090	5	849	73	3969	287	4599	170	-0.792242793	-0.400989332	-0.419930528	-0.539869157
NOP2_+_6677426.23-P1P2|NOP2_+_6677045.23-P1P2	NOP2	1183	16	1038	60	880	176	907	160	-0.648921638	-0.459224674	-0.282584207	-0.294074825
NOP58_-_203130738.23-P1P2|NOP58_-_203130504.23-P1P2	NOP58	1598	89	1654	174	4958	1178	5361	962	-0.44489582	-0.372253546	-0.259882604	-0.292060856
NPAT_+_108093330.23-P1P2|NPAT_-_108093360.23-P1P2	NPAT	114	1	147	1	1673	253	1745	309	-0.6202984	-0.676356925	-0.320435279	-0.293865646
NRDE2_+_90798262.23-P1P2|NRDE2_+_90798265.23-P1P2	NRDE2	298	1	325	7	2500	58	2446	209	-0.763001467	-0.588167866	-0.571392958	-0.408242901
NSMCE1_+_27280033.23-P1P2|NSMCE1_-_27280049.23-P1P2	NSMCE1	1608	42	1345	21	6348	420	8104	345	-0.556136268	-0.648239887	-0.432046317	-0.518102811
NSRP1_-_28444222.23-P1P2|NSRP1_-_28443902.23-P1P2	NSRP1	319	5	329	5	1986	242	2102	117	-0.609063985	-0.63249487	-0.349516076	-0.475095379
NUBP1_-_10837726.23-P1P2|NUBP1_-_10837703.23-P1P2	NUBP1	2438	535	2609	438	10525	2237	12424	1566	-0.241467635	-0.303642129	-0.274947076	-0.347677569
NUDC_-_27248261.23-P1P2|NUDC_-_27248296.23-P1P2	NUDC	2413	39	2478	79	8705	704	9267	654	-0.627523226	-0.547684906	-0.4051003	-0.438792341
NUDCD3_+_44530237.23-P1P2|NUDCD3_+_44530211.23-P1P2	NUDCD3	1776	69	1760	180	5199	557	5145	504	-0.498192282	-0.376447082	-0.367143267	-0.387146205
NUDT21_+_56485197.23-P1P2|NUDT21_-_56485228.23-P1P2	NUDT21	276	8	245	26	7084	569	7724	524	-0.526957522	-0.366743568	-0.405980597	-0.444948761
NUF2_-_163291876.23-P1P2|NUF2_+_163291904.23-P1P2	NUF2	187	7	161	32	1870	416	1655	293	-0.486664736	-0.275332592	-0.26859333	-0.293876679
NUP107_-_69080796.23-P1P2|NUP107_-_69080973.23-P1P2	NUP107	436	25	445	40	2647	285	2728	278	-0.436608928	-0.392944479	-0.366268638	-0.380705551
NUP160_+_47869833.23-P1P2|NUP160_-_47869693.23-P1P2	NUP160	358	70	328	61	2611	794	2384	315	-0.257213811	-0.286837877	-0.226578177	-0.33991574
NUP205_-_135242670.23-P1P2|NUP205_-_135243082.23-P1P2	NUP205	58	5			731	142	651	117	-0.356550005		-0.286363258	-0.290852742
NUP54_+_77069544.23-P1P2|NUP54_+_77069339.23-P1P2	NUP54	1354	54	1319	55	3164	596	3506	328	-0.493717383	-0.507249745	-0.291089815	-0.394232549
NUP62_+_50432696.23-P1P2|NUP62_-_50432220.23-P1P2	NUP62	373	17	351	21	1460	213	1578	204	-0.468277635	-0.449978506	-0.325189891	-0.343113402
NUP85_-_73201818.23-P1P2|NUP85_-_73201846.23-P1P2	NUP85	1080	32	973	111	3720	381	4248	449	-0.536268032	-0.359857916	-0.373112542	-0.375153869
NUP88_+_5322944.23-P1P2|NUP88_+_5322928.23-P1P2	NUP88	1413	169	1341	32	4736	362	5626	358	-0.331549479	-0.587865272	-0.412541175	-0.454890376
NUP93_-_56764101.23-P1P2|NUP93_-_56764129.23-P1P2	NUP93	114	2	142	20	966	324	845	189	-0.559743276	-0.323703292	-0.213208834	-0.256891252
NUP98_+_3818746.23-P1P2|NUP98_-_3818537.23-P1P2	NUP98	104	1	65	1	764	90	647	119	-0.60671201	-0.5569861	-0.353250435	-0.287240343
NUPL1_+_25875775.23-P1P2|NUPL1_+_25875800.23-P1P2	NUPL1	839	21	749	30	2255	152	2397	168	-0.559151801	-0.511100481	-0.429011389	-0.439233484
NUTM1_+_34635309.23-P1P2|NUTM1_+_34635306.23-P1P2	NUTM1	7387	348	7323	440	11060	989	13233	1067	-0.471063915	-0.455488878	-0.391604471	-0.41791714
NVL_+_224517846.23-P1P2|NVL_+_224517861.23-P1P2	NVL	2350	69	2410	148	6003	369	3694	336	-0.539996719	-0.4516432	-0.441923847	-0.39866831
ORAOV1_-_69490100.23-P1P2|ORAOV1_+_69490047.23-P1P2	ORAOV1	1426	102	1161	98	3169	232	3585	256	-0.407749647	-0.404183192	-0.418162555	-0.436594303
ORC5_-_103848433.23-P1P2|ORC5_+_103848420.23-P1P2	ORC5	1881	39	2095	96	5462	453	6634	487	-0.5903432	-0.49439553	-0.401606316	-0.432516679
OXA1L_+_23235936.23-P1P2|OXA1L_-_23235932.23-P1P2	OXA1L	1073	45	1055	44	1021	104	1002	109	-0.485694495	-0.506591316	-0.373008628	-0.369659838
PAF1_+_39881751.23-P1P2|PAF1_-_39881702.23-P1P2	PAF1	493	3	425	9	3650	282	4069	279	-0.734467881	-0.594730711	-0.410997763	-0.443027764
PAM16_-_4401236.23-P1P2|PAM16_+_4401248.23-P1P2	PAM16	1068	71	957	75	3133	701	3843	487	-0.418086298	-0.414727925	-0.267917813	-0.346640111
PARS2_+_55230150.23-P1P2|PARS2_+_55230144.23-P1P2	PARS2	2817	155	2854	192	6907	763	8937	919	-0.44737538	-0.438381989	-0.363073074	-0.379638039
PAXBP1_-_34143986.23-P1P2|PAXBP1_-_34143891.23-P1P2	PAXBP1	1497	134	1482	96	4759	918	5057	682	-0.37459615	-0.443256174	-0.287951698	-0.336929563
PCNA_+_5100595.23-P1P2|PCNA_-_5100179.23-P1P2	PCNA	274	1	298	19	1373	282	1517	272	-0.750505208	-0.439945061	-0.279230505	-0.291846616
PDCD11_-_105156445.23-P1P2|PDCD11_+_105156425.23-P1P2	PDCD11	154	7	158	1	4346	182	4955	150	-0.457838189	-0.686954219	-0.493304944	-0.571165787
PELO_-_52095976.23-P1|PELO_+_52096194.23-P1	PELO	491	30	391	10	3657	527	3997	617	-0.428044585	-0.568347177	-0.327168561	-0.315663497
PES1_-_30987859.23-P1P2|PES1_-_30987845.23-P1P2	PES1	930	8	901	21	3076	359	3436	259	-0.708002573	-0.589071949	-0.355487289	-0.428091697
PFDN2_+_161087799.23-P1P2|PFDN2_+_161087778.23-P1P2	PFDN2	2130	42	2171	74	3630	197	4122	140	-0.59809965	-0.537682368	-0.458416164	-0.552994758
PGK1_+_77359761.23-P1P2|PGK1_-_77359779.23-P1P2	PGK1	795	96	933	63	7569	759	8821	610	-0.329534604	-0.436380016	-0.376119657	-0.441973393
PHAX_-_125936670.23-P1|PHAX_-_125936686.23-P1	PHAX	593	23	619	33	4041	571	4426	470	-0.494404671	-0.469308584	-0.329835573	-0.374434563
PHB_+_47492231.23-P1P2|PHB_+_47491846.23-P1P2	PHB	407	42	472	51	1592	396	1541	241	-0.351216675	-0.366500704	-0.253532123	-0.313277901
PHB2_+_7079788.23-P1P2|PHB2_-_7079816.23-P1P2	PHB2	60	1			1926	307	2061	230	-0.525603503		-0.313421745	-0.366315607
PIAS4_+_4008092.23-P1P2|PIAS4_+_4007982.23-P1P2	PIAS4	983	79	815	109	3766	643	4032	386	-0.389977113	-0.336358181	-0.304349701	-0.390674206
PLK1_-_23690679.23-P1P2|PLK1_+_23690651.23-P1P2	PLK1	67	1			1070	379	1139	178	-0.541827675		-0.20590145	-0.313199222
PLRG1_+_155471467.23-P1P2|PLRG1_-_155471485.23-P1P2	PLRG1	99	1	79	1	1436	191	1440	135	-0.59942533	-0.585421958	-0.337583197	-0.393285313
PMF1_-_156182834.23-P1P2|PMF1_+_156183115.23-P1P2	PMF1	2846	13	3057	28	8185	723	8596	643	-0.808950761	-0.728707163	-0.393210787	-0.42963307
PMF1-BGLAP_-_156182834.23-P1P2|PMF1-BGLAP_+_156183115.23-P1P2	PMF1-BGLAP	2846	13	3057	28	8185	723	8596	643	-0.808950761	-0.728707163	-0.393210787	-0.42963307
PMPCB_+_102937876.23-P1|PMPCB_-_102938097.23-P1	PMPCB	807	68	925	48	4246	716	4621	607	-0.382637632	-0.474584914	-0.306042752	-0.341047826
PNISR_+_99873121.23-P1|PNISR_+_99873109.23-P1	PNISR	1336	107	1411	104	2649	530	2934	231	-0.390940864	-0.424289864	-0.282940837	-0.421177571
PNPT1_-_55920888.23-P1P2|PNPT1_-_55920565.23-P1P2	PNPT1	2025	23	2000	28	4406	370	5655	315	-0.677644768	-0.666015848	-0.39986581	-0.475771014
POLD2_+_44163100.23-P1P2|POLD2_-_44162910.23-P1P2	POLD2	1361	26	1280	73	4956	670	5173	483	-0.600746996	-0.461617993	-0.335826257	-0.394682185
POLD3_+_74303696.23-P1P2|POLD3_-_74303706.23-P1P2	POLD3	1361	66	1307	45	2398	213	2531	225	-0.465011832	-0.534976956	-0.392056898	-0.402062951
POLE_-_133263932.23-P1P2|POLE_+_133263949.23-P1P2	POLE	712	89	665	114	1849	375	2077	296	-0.324275121	-0.299762145	-0.28102608	-0.32799295
POLG2_+_62493131.23-P1P2|POLG2_+_62493140.23-P1P2	POLG2	2714	208	3105	193	6272	1004	7213	918	-0.398133525	-0.450073718	-0.313104525	-0.346095659
POLR1A_+_86332623.23-P1P2|POLR1A_+_86332635.23-P1P2	POLR1A	2515	523	2400	573	8592	2644	10268	1945	-0.249491274	-0.251670387	-0.225060984	-0.283614681
POLR1B_-_113300081.23-P1P2|POLR1B_+_113300085.23-P1P2	POLR1B	817	34	753	135	2910	279	3072	202	-0.485845395	-0.293314354	-0.38189481	-0.449414468
POLR1D_+_28196016.23-P1|POLR1D_+_28196036.23-P1	POLR1D	1796	43	1740	57	4914	234	5523	173	-0.569206581	-0.542982552	-0.476141786	-0.56593115
POLR1E_+_37486167.23-P1P2|POLR1E_-_37486076.23-P1P2	POLR1E	3376	355	3314	335	5570	1413	6560	1213	-0.351178626	-0.378510856	-0.251066594	-0.287369884
POLR2B_+_57845253.23-P1P2|POLR2B_+_57845291.23-P1P2	POLR2B	665	15	544	116	4649	1154	5361	1073	-0.572046673	-0.267575606	-0.253980955	-0.274897684
POLR2C_-_57496616.23-P1P2|POLR2C_-_57496602.23-P1P2	POLR2C	366	56	401	1	1938	244	2034	290	-0.293306287	-0.824061671	-0.345113786	-0.327914097
POLR2D_-_128615513.23-P1|POLR2D_+_128615628.23-P1	POLR2D	490	87	316	110	1784	465	2149	399	-0.271919264	-0.195257519	-0.247269212	-0.286510283
POLR2G_-_62529086.23-P1P2|POLR2G_+_62529069.23-P1P2	POLR2G	123	26	87	26	1444	173	1656	79	-0.242846926	-0.214788354	-0.351604546	-0.498742021
POLR2H_-_184081237.23-P1P2|POLR2H_+_184081227.23-P1P2	POLR2H	315	1	198	1	1077	141	1032	99	-0.77126017	-0.720124471	-0.339500252	-0.389291482
POLR2I_+_36605783.23-P1P2|POLR2I_-_36605759.23-P1P2	POLR2I	316	5	197	8	1037	97	686	19	-0.607657249	-0.497051418	-0.384405537	-0.578328542
POLR2M_+_57998958.23-P1P2|POLR2M_-_57999302.23-P1P2	POLR2M	1504	145	1740	159	3207	679	3586	404	-0.363593759	-0.392987972	-0.275357556	-0.365083803
POLR3A_-_79789274.23-P1P2|POLR3A_-_79788928.23-P1P2	POLR3A	1725	106	1690	95	3880	618	4583	408	-0.430470213	-0.464189412	-0.313707988	-0.402123101
POLR3B_-_106751759.23-P1P2|POLR3B_-_106751930.23-P1P2	POLR3B	2331	107	2226	137	7343	1721	8655	1242	-0.474022471	-0.451245041	-0.261751334	-0.327252862
POLR3F_+_18448087.23-P1P2|POLR3F_-_18448020.23-P1P2	POLR3F	1731	154	1654	91	7786	1529	9370	972	-0.375640922	-0.467299566	-0.285588255	-0.378268903
POP5_-_121019190.23-P1P2|POP5_+_121019173.23-P1P2	POP5	669	58	657	21	5539	551	6180	408	-0.378050387	-0.542449014	-0.377140576	-0.449149624
PPAN_-_10217084.23-P1P2|PPAN_-_10217074.23-P1P2	PPAN	3357	192	3026	130	10988	1294	12802	969	-0.441772461	-0.504307395	-0.354513501	-0.427850369
PPAN-P2RY11_-_10217084.23-P1P2|PPAN-P2RY11_-_10217074.23-P1P2	PPAN-P2RY11	3357	192	3026	130	10988	1294	12802	969	-0.441772461	-0.504307395	-0.354513501	-0.427850369
PPIE_+_40204766.23-P1P2|PPIE_-_40204654.23-P1P2	PPIE	951	38	1070	75	3911	902	4559	603	-0.492340377	-0.431209577	-0.263866059	-0.339961604
PRIM1_-_57146107.23-P1P2|PRIM1_+_57146097.23-P1P2	PRIM1	492	1	396	11	1646	210	1825	179	-0.837684921	-0.557358905	-0.343250842	-0.386439748
PRIM2_+_57182462.23-P1P2|PRIM2_-_57182458.23-P1P2	PRIM2	644	46	693	7	957	200	1092	154	-0.406331159	-0.69985472	-0.276737244	-0.329224408
PRMT5_+_23398566.23-P1|PRMT5_+_23398587.23-P1	PRMT5	3140	314	3416	433	4671	1215	5114	1049	-0.358632785	-0.345159172	-0.247678075	-0.271033746
PRPF18_-_13629033.23-P1P2|PRPF18_+_13629281.23-P1P2	PRPF18	412	38	386	73	3872	762	4035	480	-0.367617831	-0.284685103	-0.28522943	-0.356581452
PRPF19_-_60674010.23-P1P2|PRPF19_-_60673960.23-P1P2	PRPF19	453	19	365	29	3909	315	4677	401	-0.481492018	-0.409897486	-0.405367337	-0.408032606
PRPF3_-_150294069.23-P1P2|PRPF3_-_150294051.23-P1P2	PRPF3	772	84	810	155	2628	250	2767	450	-0.344878485	-0.283805953	-0.382898433	-0.307380495
PRPF4_-_116037979.23-P1P2|PRPF4_-_116037989.23-P1P2	PRPF4	481	23	371	4	2563	154	2285	98	-0.463200759	-0.677153784	-0.444515374	-0.515843796
PRPF8_+_1588005.23-P1P2|PRPF8_+_1588152.23-P1P2	PRPF8	213	13	234	31	2256	231	2416	230	-0.422433184	-0.334867537	-0.372940941	-0.391307225
PSMA1_-_14541640.23-P1P2|PSMA1_+_14541841.23-P1P2	PSMA1	419	60	312	59	1703	264	1657	250	-0.303323052	-0.284315417	-0.317113965	-0.318944305
PSMA3_-_58711601.23-P1P2|PSMA3_+_58711815.23-P1P2	PSMA3	140	13	152	2	1432	225	1262	254	-0.360123077	-0.621333562	-0.315224513	-0.273644496
PSMA4_-_78832818.23-P1P2|PSMA4_+_78833014.23-P1P2	PSMA4	208	18	181	19	2843	566	2832	402	-0.373294422	-0.366563193	-0.283622353	-0.328736466
PSMA5_+_109968996.23-P1P2|PSMA5_-_109969028.23-P1P2	PSMA5	89	1	113	1	3385	790	3716	390	-0.58369002	-0.637774614	-0.26225147	-0.376219489
PSMB2_+_36107087.23-P1P2|PSMB2_+_36107080.23-P1P2	PSMB2	411	88	380	84	2038	617	3022	511	-0.244033084	-0.261890007	-0.227144055	-0.301286783
PSMB5_+_23504053.23-P1P2|PSMB5_-_23504062.23-P1P2	PSMB5	168	6	203	17	1138	189	1011	104	-0.490695343	-0.39900518	-0.307659325	-0.378384143
PSMB6_-_4699534.23-P1|PSMB6_-_4699495.23-P1	PSMB6	129	1	187	1	1616	203	1737	231	-0.638608728	-0.711719167	-0.345321213	-0.338742193
PSMB7_-_127177679.23-P1P2|PSMB7_+_127177501.23-P1P2	PSMB7	360	78	318	45	1720	420	1993	253	-0.24209801	-0.326397631	-0.256038628	-0.346106821
PSMC1_-_90722958.23-P1P2|PSMC1_-_90723020.23-P1P2	PSMC1	119	7	66	18	1096	282	1021	186	-0.419615227	-0.226429497	-0.248873638	-0.289129723
PSMC2_-_102988187.23-P1P2|PSMC2_-_102988137.23-P1P2	PSMC2	81	4	106	1	987	234	1095	226	-0.432941657	-0.6284075	-0.259823238	-0.269631203
PSMC4_-_40477112.23-P1P2|PSMC4_-_40477115.23-P1P2	PSMC4	274	15	224	8	1848	216	1848	266	-0.439946201	-0.515947378	-0.355068844	-0.326376021
PSMD1_-_231921650.23-P1P2|PSMD1_+_231921605.23-P1P2	PSMD1	205	1	169	11	2046	306	2311	356	-0.707359526	-0.431989616	-0.322005505	-0.315832056
PSMD12_+_65362663.23-P1P2|PSMD12_+_65362472.23-P1P2	PSMD12	972	91	803	131	3138	465	3980	400	-0.367425107	-0.307218011	-0.323379582	-0.383041578
PSMD2_+_184017068.23-P1P2|PSMD2_+_184017090.23-P1P2	PSMD2	347	39	313	31	1423	246	1542	245	-0.338261687	-0.377706042	-0.302394818	-0.310800696
PSMD4_-_151227239.23-P1P2|PSMD4_-_151227302.23-P1P2	PSMD4	1426	60	1523	47	3453	355	4238	332	-0.485986002	-0.551278167	-0.372577317	-0.422155335
PSMD6_+_64009073.23-P1P2|PSMD6_-_64009133.23-P1P2	PSMD6	103	3	140	34	2082	456	2126	255	-0.501763169	-0.246112557	-0.270715432	-0.3550315
PSMD7_-_74330744.23-P1P2|PSMD7_+_74330741.23-P1P2	PSMD7	321	15	238	57	1593	174	1544	131	-0.463510287	-0.249454511	-0.364063847	-0.408945642
PSPH_-_56119277.23-P2|PSPH_-_56119094.23-P2	PSPH	1476	146	1287	224	2096	440	2525	384	-0.359769592	-0.298045687	-0.2764238	-0.317879916
PTCD3_-_86333438.23-P1P2|PTCD3_+_86333424.23-P1P2	PTCD3	2129	444	1776	200	5368	857	6762	648	-0.249023674	-0.362291649	-0.313445066	-0.390666031
PTTG1_-_159848867.23-P1P2|PTTG1_-_159848943.23-P1P2	PTTG1	1441	230	1446	81	4844	774	5347	760	-0.288685187	-0.464455678	-0.313316524	-0.328687638
QARS_-_49142149.23-P1P2|QARS_-_49142355.23-P1P2	QARS	1142	22	1072	74	3221	193	3244	164	-0.598513481	-0.433443226	-0.445054794	-0.490590522
RABGGTB_+_76251918.23-P1P2|RABGGTB_-_76252008.23-P1P2	RABGGTB	2657	116	2805	129	6454	870	7643	665	-0.481610059	-0.494233781	-0.336255218	-0.405863493
RACGAP1_-_50419239.23-P1P2|RACGAP1_+_50419209.23-P1P2	RACGAP1					208	30	167	26			-0.323497306	-0.309538109
RAD51_-_40987434.23-P1P2|RAD51_+_40987418.23-P1P2	RAD51	535	63	585	67	4174	1135	4924	823	-0.332575744	-0.358512729	-0.241688946	-0.303210689
RAD9B_+_110939870.23-P1P2|RAD9B_+_110939846.23-P1P2	RAD9B	4174	378	4343	365	11597	1558	12897	1054	-0.373509207	-0.405829792	-0.33677024	-0.415797929
RARS_-_167913515.23-P1P2|RARS_-_167913708.23-P1P2	RARS	1141	77	1096	128	4301	649	4683	436	-0.415997641	-0.356548235	-0.321005071	-0.395100374
RBM14_+_66384103.23-P1P2|RBM14_-_66384112.23-P1P2	RBM14	9617	537	10138	396	11580	1542	13325	1349	-0.445823121	-0.519100693	-0.337963385	-0.382142533
RBM14-RBM4_+_66384103.23-P1|RBM14-RBM4_-_66384112.23-P1	RBM14-RBM4	9617	537	10138	396	11580	1542	13325	1349	-0.445823121	-0.519100693	-0.337963385	-0.382142533
RBM28_-_127983855.23-P1P2|RBM28_-_127983894.23-P1P2	RBM28	1248	33	1239	41	4719	755	7514	570	-0.553383791	-0.5405325	-0.313138979	-0.427398581
RBM4_+_66384103.23-P1|RBM4_-_66384112.23-P1	RBM4	9617	537	10138	396	11580	1542	13325	1349	-0.445823121	-0.519100693	-0.337963385	-0.382142533
RBM8A_-_145507844.23-P1P2|RBM8A_-_145507837.23-P1P2	RBM8A	113	13	135	22	983	358	918	242	-0.328377597	-0.302837203	-0.202143255	-0.231204262
RBMX_-_135962895.23-P1P2|RBMX_+_135962479.23-P1P2	RBMX	809	48	758	54	2099	250	2123	141	-0.434126372	-0.428113379	-0.352606394	-0.447530585
RBMX2_-_129536016.23-P1P2|RBMX2_-_129536058.23-P1P2	RBMX2	964	2	941	9	2768	177	2837	136	-0.877434278	-0.712033337	-0.43623124	-0.498763504
RCC1_-_28844804.23-P2|RCC1_-_28844824.23-P2	RCC1	883	51	788	9	3914	413	3832	353	-0.438308006	-0.685834387	-0.369118504	-0.396694359
RCL1_+_4792990.23-P1P2|RCL1_+_4792987.23-P1P2	RCL1	779	42	634	41	4804	364	5683	295	-0.447997728	-0.441607129	-0.413722095	-0.486834461
REXO2_-_114310257.23-P1P2|REXO2_+_114310243.23-P1P2	REXO2	1269	21	1182	32	2940	183	3352	118	-0.620887543	-0.569224432	-0.439886679	-0.547159601
RFC2_+_73668703.23-P1P2|RFC2_+_73668706.23-P1P2	RFC2	1804	61	1707	90	4462	598	4804	694	-0.518652102	-0.473574574	-0.336976099	-0.326116258
RFC3_+_34392320.23-P1P2|RFC3_-_34392375.23-P1P2	RFC3	575	1	565	28	2773	249	3003	194	-0.860923137	-0.479351175	-0.390675341	-0.452167211
RFC4_+_186524226.23-P1P2|RFC4_+_186524236.23-P1P2	RFC4	1594	257	1701	165	3845	765	4335	425	-0.287236641	-0.384197347	-0.283757086	-0.386965535
RINT1_-_105172650.23-P1P2|RINT1_+_105172659.23-P1P2	RINT1	3726	273	3504	99	7738	889	8742	530	-0.405006161	-0.56589475	-0.357806381	-0.462636769
RIOK1_-_7390078.23-P1P2|RIOK1_+_7390080.23-P1P2	RIOK1	1479	61	1528	73	5899	471	6951	482	-0.489003897	-0.487777617	-0.406739677	-0.441479556
RIOK2_+_96518912.23-P1P2|RIOK2_-_96518949.23-P1P2	RIOK2	769	10	814	52	2009	96	2136	121	-0.649676554	-0.444111272	-0.474890215	-0.47237387
RNASEK_+_6915949.23-P1P2|RNASEK_+_6915965.23-P1P2	RNASEK	5155	597	4851	591	12630	1422	14452	998	-0.336917947	-0.351096382	-0.360581276	-0.442287354
RNF113A_-_119005686.23-P1P2|RNF113A_+_119005641.23-P1P2	RNF113A	526	5	503	47	2214	362	2479	199	-0.683570305	-0.387715947	-0.310048935	-0.418026472
RNF20_+_104296142.23-P1P2|RNF20_+_104296191.23-P1P2	RNF20	1156	22	1188	35	5128	691	6134	568	-0.600331645	-0.557110473	-0.336270279	-0.396030242
RNPC3_+_104068769.23-P1P2|RNPC3_+_104068758.23-P1P2	RNPC3	2166	388	1920	302	5023	1255	5900	1010	-0.271682152	-0.313141192	-0.253108258	-0.299477753
RPA1_-_1733358.23-P1P2|RPA1_-_1733303.23-P1P2	RPA1	145	13	127	12	2321	490	2194	545	-0.365327343	-0.378212141	-0.275685178	-0.240815989
RPA2_+_28241031.23-P1P2|RPA2_+_28240864.23-P1P2	RPA2	309	2	394	22	2164	262	2081	386	-0.707842071	-0.460444376	-0.35041969	-0.286652032
RPA3_-_7680087.23-P1P2|RPA3_-_7679719.23-P1P2	RPA3	516	141	394	27	2790	294	2892	211	-0.208164167	-0.431367227	-0.369182582	-0.433093205
RPAP1_+_41836411.23-P1P2|RPAP1_+_41836408.23-P1P2	RPAP1	888	48	737	125	3994	658	4605	675	-0.448025079	-0.301433125	-0.30916855	-0.323822661
RPAP2_-_92764613.23-P1P2|RPAP2_+_92764648.23-P1P2	RPAP2	671	18	539	1	3269	277	3587	156	-0.547720746	-0.867685022	-0.398541328	-0.51421788
RPF1_-_84945270.23-P1P2|RPF1_-_84945203.23-P1P2	RPF1	1112	59	1041	15	5985	685	7721	447	-0.451339522	-0.657472314	-0.358277585	-0.469840617
RPF2_-_111303321.23-P1P2|RPF2_+_111303465.23-P1P2	RPF2	1471	90	1491	82	4900	398	5348	302	-0.430886109	-0.467190841	-0.404380734	-0.473600223
RPL10_-_153626730.23-P1P2|RPL10_+_153626685.23-P1P2	RPL10	179	4	154	6	1592	145	1679	99	-0.55036413	-0.498008166	-0.388407883	-0.465804129
RPL10A_-_35436407.23-P1P2|RPL10A_-_35436216.23-P1P2	RPL10A	463	35	385	39	3530	684	3702	433	-0.396961542	-0.375237619	-0.287304606	-0.359210702
RPL11_+_24018674.23-P1P2|RPL11_+_24018498.23-P1P2	RPL11	327	34	327	63	2640	512	2943	416	-0.349364543	-0.2816949	-0.287131956	-0.329410351
RPL13_-_89627126.23-P1P2|RPL13_+_89627141.23-P1P2	RPL13	173	1	203	41	1594	283	1678	123	-0.682146583	-0.273760055	-0.298864668	-0.431867475
RPL14_+_40498846.23-P1P2|RPL14_+_40499019.23-P1P2	RPL14	445	5	333	16	1926	324	1864	135	-0.658646987	-0.480331114	-0.306177879	-0.433863862
RPL17_-_47018814.23-P1P2|RPL17_-_47018796.23-P1P2	RPL17	240	4	232	4	815	93	980	97	-0.593949662	-0.607996749	-0.357578958	-0.38434395
RPL18_-_49122442.23-P1P2|RPL18_-_49122404.23-P1P2	RPL18	308	13	259	23	1454	185	1271	157	-0.477298199	-0.392335608	-0.343542335	-0.350069438
RPL19_-_37356608.23-P1P2|RPL19_+_37356736.23-P1P2	RPL19	485	14	473	18	1957	199	2182	178	-0.53462882	-0.515635856	-0.373791329	-0.415410597
RPL21_+_27825728.23-P1P2|RPL21_+_27825711.23-P1P2	RPL21	791	93	572	97	3320	544	3726	294	-0.333474148	-0.301175379	-0.309864294	-0.420966466
RPL23_+_37009944.23-P1P2|RPL23_-_37010011.23-P1P2	RPL23	160	11	175	22	1816	345	1778	196	-0.402955163	-0.340948758	-0.289810545	-0.368138878
RPL23A_-_27047048.23-P1P2|RPL23A_+_27047315.23-P1P2	RPL23A	405	6	381	19	1494	142	1582	238	-0.621591459	-0.47615686	-0.382646429	-0.31936895
RPL24_-_101405503.23-P1P2|RPL24_-_101405298.23-P1P2	RPL24	333	4	279	57	1998	443	1974	304	-0.642688271	-0.272857811	-0.269056565	-0.315813091
RPL26_+_8286473.23-P1P2|RPL26_+_8286288.23-P1P2	RPL26	511	20	453	2	2685	193	2855	164	-0.492160981	-0.782108218	-0.420522346	-0.470500827
RPL27_+_41150471.23-P1P2|RPL27_-_41150504.23-P1P2	RPL27	141	21	105	15	2340	282	2512	356	-0.293675776	-0.319642487	-0.351075639	-0.328947571
RPL27A_-_8704367.23-P1P2|RPL27A_-_8704363.23-P1P2	RPL27A	295	13	227	20	975	173	1146	81	-0.470878979	-0.392660124	-0.298696467	-0.436982793
RPL30_+_99057726.23-P1P2|RPL30_-_99057772.23-P1P2	RPL30	269	8	255	40	2823	409	3249	309	-0.523134896	-0.310885063	-0.326383423	-0.391617681
RPL31_-_101618787.23-P1P2|RPL31_-_101618790.23-P1P2	RPL31	390	1	247	2	2178	119	2145	36	-0.803065973	-0.692727872	-0.457085817	-0.660743242
RPL34_+_109541791.23-P1P2|RPL34_-_109541761.23-P1P2	RPL34	387	12	412	36	3476	655	3672	408	-0.522367042	-0.396755617	-0.291059225	-0.367265069
RPL35A_-_197677284.23-P1P2|RPL35A_+_197677288.23-P1P2	RPL35A	255	13	236	30	1975	326	2206	279	-0.449196436	-0.340813233	-0.308736333	-0.346741814
RPL36_+_5690269.23-P1P2|RPL36_+_5690358.23-P1P2	RPL36	349	2	342	29	1388	156	1385	180	-0.725966988	-0.400303728	-0.360137242	-0.342191951
RPL36A_-_100646038.23-P1P2|RPL36A_-_100646053.23-P1P2	RPL36A	5635	1400	5439	1218	8891	3019	10513	2511	-0.223064923	-0.261239625	-0.211796052	-0.247157885
RPL36A-HNRNPH2_-_100646038.23-P1P2|RPL36A-HNRNPH2_-_100646053.23-P1P2	RPL36A-HNRNPH2	5635	1400	5439	1218	8891	3019	10513	2511	-0.223064923	-0.261239625	-0.211796052	-0.247157885
RPL37A_-_217363610.23-P1P2|RPL37A_-_217363600.23-P1P2	RPL37A	528	16	493	20	2806	286	2925	222	-0.528597678	-0.506950822	-0.37366026	-0.426919159
RPL38_-_72199864.23-P1P2|RPL38_-_72200186.23-P1P2	RPL38	428	3	320	3	1271	70	1271	62	-0.713398171	-0.688342183	-0.455270485	-0.494726016
RPL4_-_66797132.23-P1P2|RPL4_+_66797200.23-P1P2	RPL4	228	9	175	11	1968	262	2061	297	-0.48280209	-0.437116735	-0.337624931	-0.326248052
RPL5_+_93298010.23-P1P2|RPL5_-_93298046.23-P1P2	RPL5	222	24	321	54	2449	446	2640	293	-0.341991326	-0.30136756	-0.29557882	-0.36730979
RPL6_-_112847347.23-P1P2|RPL6_-_112847036.23-P1P2	RPL6	281	15	235	28	2173	321	2062	272	-0.443700192	-0.350046339	-0.323689505	-0.340109651
RPL7_-_74205848.23-P1P2|RPL7_+_74205616.23-P1P2	RPL7	324	2	328	14	1280	140	1211	67	-0.714899162	-0.496602807	-0.363716053	-0.47510858
RPL7A_-_136215123.23-P1P2|RPL7A_+_136215092.23-P1P2	RPL7A	70	1	70	17	1301	189	1479	164	-0.548275323	-0.242993067	-0.325693129	-0.367076748
RPL8_+_146017745.23-P1P2|RPL8_-_146017783.23-P1P2	RPL8	329	7	251	14	2953	212	2772	183	-0.570695105	-0.457190527	-0.42074793	-0.448713684
RPL9_+_39460483.23-P1P2|RPL9_+_39460504.23-P1P2	RPL9	243	22	224	1	2174	205	2068	282	-0.367884874	-0.738275759	-0.383977338	-0.334906677
RPLP0_-_120638701.23-P1P2|RPLP0_-_120638740.23-P1P2	RPLP0	610	14	385	35	3447	559	4413	681	-0.568812678	-0.390811706	-0.311263495	-0.315733645
RPP30_+_92631924.23-P1P2|RPP30_-_92632066.23-P1P2	RPP30	1521	8	1359	62	1416	68	1439	37	-0.781409952	-0.494252175	-0.473678312	-0.59377973
RPP40_-_5004221.23-P1P2|RPP40_+_5004190.23-P1P2	RPP40	98	7	63	4	5920	617	6931	308	-0.390885002	-0.41699407	-0.370880418	-0.511300703
RPS10_-_34393845.23-P1P2|RPS10_-_34393835.23-P1P2	RPS10	1321	241	1043	170	7658	2038	8564	1518	-0.268761462	-0.307565953	-0.244631086	-0.294042084
RPS10-NUDT3_-_34393845.23-P1P2|RPS10-NUDT3_-_34393835.23-P1P2	RPS10-NUDT3	1321	241	1043	170	7658	2038	8564	1518	-0.268761462	-0.307565953	-0.244631086	-0.294042084
RPS13_+_17099232.23-P1P2|RPS13_+_17099153.23-P1P2	RPS13	251	14	171	16	2258	184	2418	250	-0.436540562	-0.3822328	-0.403583687	-0.378373614
RPS14_+_149829238.23-P1P2|RPS14_+_149829235.23-P1P2	RPS14	471	56	421	116	2937	682	3368	431	-0.330884631	-0.229766874	-0.262909838	-0.345065621
RPS15A_-_18801590.23-P1P2|RPS15A_+_18801235.23-P1P2	RPS15A	678	96	647	72	3417	697	3965	533	-0.305791658	-0.362890949	-0.280384282	-0.337383595
RPS16_+_39926539.23-P1P2|RPS16_-_39926387.23-P1P2	RPS16	305	22	259	21	1289	253	1441	180	-0.401699626	-0.405197378	-0.285301778	-0.348423566
RPS18_+_33239894.23-P1P2|RPS18_+_33239917.23-P1P2	RPS18	700	41	632	98	2045	279	1936	190	-0.435563738	-0.314395009	-0.334351941	-0.386391925
RPS19_-_42364369.23-P1P2|RPS19_+_42364314.23-P1P2	RPS19	595	28	352	1	4536	554	4667	535	-0.466643895	-0.804847807	-0.349480125	-0.362435572
RPS20_+_56986834.23-P1P2|RPS20_+_56986933.23-P1P2	RPS20	801	158	861	145	1905	352	2123	319	-0.256849686	-0.302613701	-0.293557606	-0.31970278
RPS23_+_81574137.23-P1P2|RPS23_+_81574124.23-P1P2	RPS23	578	49	568	38	2461	218	2809	164	-0.380968514	-0.436339431	-0.392437976	-0.467946209
RPS24_+_79793693.23-P1P2|RPS24_+_79793627.23-P1P2	RPS24	445	27	398	39	2051	333	2194	221	-0.42858566	-0.38013392	-0.310969073	-0.382401733
RPS26_-_56435953.23-P1P2|RPS26_+_56435856.23-P1P2	RPS26	372	47	395	62	1906	386	2272	268	-0.321393563	-0.31187161	-0.281229694	-0.357683113
RPS27_+_153963275.23-P1P2|RPS27_-_153963444.23-P1P2	RPS27	828	83	736	85	1862	185	1973	208	-0.357091446	-0.357689167	-0.376870234	-0.375199747
RPS27A_+_55459832.23-P1P2|RPS27A_-_55459862.23-P1P2	RPS27A	172	13	150	10	2297	220	2496	303	-0.390669338	-0.427332309	-0.381917652	-0.353226514
RPS3_-_75110633.23-P1|RPS3_-_75110807.23-P1	RPS3	522	52	505	90	2330	340	2480	414	-0.357074449	-0.293748889	-0.325361095	-0.303246786
RPS4X_+_71497070.23-P1P2|RPS4X_+_71496884.23-P1P2	RPS4X	464	18	464	13	2209	238	2361	219	-0.492727939	-0.557942849	-0.366095533	-0.39536184
RPS5_+_58898640.23-P1P2|RPS5_+_58898715.23-P1P2	RPS5	728	31	526	48	2665	345	2887	307	-0.482025621	-0.391264296	-0.34150385	-0.374057036
RPS6_+_19380176.23-P1P2|RPS6_+_19380221.23-P1P2	RPS6	251	19	276	24	1029	145	1043	156	-0.393576017	-0.395663545	-0.32961331	-0.319991252
RPS7_-_3622944.23-P1P2|RPS7_-_3622948.23-P1P2	RPS7	585	13	473	26	3070	206	3561	184	-0.57287727	-0.463693234	-0.429837775	-0.487254621
RRM1_-_4116293.23-P1P2|RRM1_+_4116464.23-P1P2	RRM1	365	30	365	62	2028	471	1830	422	-0.383860872	-0.300226448	-0.262819482	-0.252446757
RRM2_+_10262870.23-P1P2|RRM2_+_10262917.23-P1P2	RRM2	134	7	98	10	1818	218	1786	280	-0.437205807	-0.364929838	-0.351626273	-0.312969699
RRP12_+_99161057.23-P1P2|RRP12_-_99161036.23-P1P2	RRP12	929	56	800	27	4335	688	4829	548	-0.432172815	-0.535870259	-0.314210021	-0.36403268
RRP15_+_218458668.23-P1P2|RRP15_+_218458665.23-P1P2	RRP15	1712	353	1528	219	5088	746	6065	630	-0.2506518	-0.326721639	-0.324902841	-0.377979076
RRS1_+_67341292.23-P1P2|RRS1_+_67341681.23-P1P2	RRS1	1447	50	1316	60	2939	209	3165	142	-0.514908182	-0.494271774	-0.422019933	-0.509226689
RSL24D1_-_55488919.23-P1P2|RSL24D1_-_55488741.23-P1P2	RSL24D1	187	1	140	6	3612	424	4274	237	-0.693704073	-0.484015025	-0.354758959	-0.476327751
RTCB_+_32808188.23-P1P2|RTCB_+_32808194.23-P1P2	RTCB	3350	116	3079	93	8595	1252	10491	813	-0.516211568	-0.555934017	-0.325844619	-0.424116864
RUVBL1_+_127842630.23-P1P2|RUVBL1_+_127842420.23-P1P2	RUVBL1	577	64	480	19	1715	233	1928	170	-0.341526953	-0.51022082	-0.334834344	-0.403142797
SAE1_-_47634169.23-P1P2|SAE1_-_47634161.23-P1P2	SAE1	1989	37	1783	81	3182	353	3904	208	-0.606337236	-0.495403495	-0.362320023	-0.482528052
SAMM50_+_44351418.23-P1P2|SAMM50_-_44351423.23-P1P2	SAMM50	1723	54	1435	36	4281	568	4926	318	-0.529687044	-0.580960747	-0.338321738	-0.45257532
SAP18_+_21714669.23-P1P2|SAP18_-_21714706.23-P1P2	SAP18	2937	298	3160	561	4199	566	4488	579	-0.356439907	-0.295443567	-0.336189443	-0.343871737
SARS_-_109756603.23-P1P2|SARS_+_109756940.23-P1P2	SARS	525	14	487	6	1528	206	1619	189	-0.546441086	-0.66753818	-0.335807859	-0.359101093
SART1_-_65729256.23-P1P2|SART1_-_65729572.23-P1P2	SART1	657	265	663	185	3356	719	3192	459	-0.150440356	-0.228244963	-0.273772157	-0.326743874
SCFD1_-_31091597.23-P1P2|SCFD1_-_31091592.23-P1P2	SCFD1	392	146	365	19	2792	304	2861	294	-0.162039923	-0.469832168	-0.364784372	-0.379418904
SDAD1_+_76912051.23-P1P2|SDAD1_+_76911874.23-P1P2	SDAD1	1193	41	1287	53	7310	720	8684	629	-0.515099606	-0.508997909	-0.378528593	-0.434693201
SEC13_-_10362784.23-P1P2|SEC13_+_10362755.23-P1P2	SEC13	162	3	106	4	3584	425	3758	283	-0.568873773	-0.492964048	-0.353393097	-0.428290144
SEC22B_-_145096423.23-P1P2|SEC22B_+_145096647.23-P1P2	SEC22B	1188	70	1469	55	5281	612	5874	651	-0.436064014	-0.523159399	-0.356577914	-0.367794931
SEC61A1_-_127771295.23-P1|SEC61A1_-_127771292.23-P1	SEC61A1	533	29	603	31	3028	256	3364	243	-0.445175759	-0.474405221	-0.398809315	-0.434753325
SF3A1_-_30752688.23-P1|SF3A1_+_30752830.23-P1	SF3A1	194	27	177	4	1285	170	1269	159	-0.305027732	-0.568196266	-0.338231848	-0.347842882
SF3A2_-_2236905.23-P1|SF3A2_-_2236873.23-P1	SF3A2	409	16	328	13	2999	483	3154	347	-0.490539312	-0.506801134	-0.312162795	-0.368758488
SF3B2_-_65819849.23-P1P2|SF3B2_-_65820053.23-P1P2	SF3B2	74	1			675	171	734	127	-0.556460786		-0.250735798	-0.296906759
SF3B4_+_149899609.23-P1P2|SF3B4_+_149899616.23-P1P2	SF3B4	276	30	216	35	1074	259	1138	168	-0.342250347	-0.305677915	-0.257571167	-0.322105467
SF3B5_-_144416509.23-P1P2|SF3B5_+_144416500.23-P1P2	SF3B5	364	62	404	134	2565	396	2690	491	-0.277542984	-0.202536139	-0.317810151	-0.28925264
SGOL1_+_20227653.23-P1P2|SGOL1_+_20227643.23-P1P2	SGOL1	2658	379	2789	566	4758	1131	5275	655	-0.305735502	-0.275679785	-0.259817089	-0.349914
SHFM1_+_96339147.23-P1P2|SHFM1_+_96338938.23-P1P2	SHFM1	1226	21	1238	12	3879	212	4246	234	-0.615743314	-0.71376137	-0.457513054	-0.477289638
SIRT7_+_79875714.23-P1P2|SIRT7_+_79875815.23-P1P2	SIRT7	1625	6	1731	42	3357	178	3880	156	-0.828814608	-0.58644966	-0.461479355	-0.526567776
SLC35A1_-_88182748.23-P1P2|SLC35A1_-_88182724.23-P1P2	SLC35A1	1525	303	1503	326	4425	1303	4893	974	-0.256128802	-0.265700025	-0.230964293	-0.275744222
SLC39A9_+_69865454.23-P1P2|SLC39A9_+_69865417.23-P1P2	SLC39A9	1077	141	1140	89	3611	1541	4303	1103	-0.31790754	-0.41557584	-0.18095827	-0.235983909
SLMO2_-_57617833.23-P1P2|SLMO2_-_57617811.23-P1P2	SLMO2	937	74	799	112	2524	373	2816	282	-0.392465623	-0.329453632	-0.323685193	-0.383459121
SLU7_+_159846048.23-P1P2|SLU7_+_159846060.23-P1P2	SLU7	216	4	232	45	1978	417	1822	327	-0.578283192	-0.279960493	-0.275836927	-0.291775505
SMC1A_-_53449606.23-P1P2|SMC1A_+_53449593.23-P1P2	SMC1A	941	40	838	84	2647	263	3047	166	-0.483294383	-0.378578513	-0.377060901	-0.478841596
SMC2_-_106856631.23-P1P2|SMC2_+_106856781.23-P1P2	SMC2	471	2	481	57	2992	452	2960	316	-0.77062868	-0.353145344	-0.32077268	-0.37345303
SMC4_-_160117471.23-P1|SMC4_+_160117510.23-P1	SMC4	625	2	605	29	1890	312	1820	159	-0.812800087	-0.484433771	-0.308707772	-0.404538893
SMN1_-_70220949.23-ENST00000380707.4|SMN1_+_70221266.23-ENST00000380707.4	SMN1	1930	102	1650	133	8415	749	9298	696	-0.452921783	-0.411355065	-0.392189772	-0.429539755
SMN2_-_69345531.23-ENST00000380743.4|SMN2_+_69345848.23-ENST00000380743.4	SMN2	1930	102	1650	133	8415	749	9298	696	-0.452921783	-0.411355065	-0.392189772	-0.429539755
SMNDC1_-_112064253.23-P1P2|SMNDC1_+_112064288.23-P1P2	SMNDC1	1467	132	1263	220	2316	494	2714	416	-0.373803966	-0.297916845	-0.274300558	-0.316670387
SMU1_+_33076608.23-P1P2|SMU1_-_33076431.23-P1P2	SMU1	154	22	158	1	840	76	627	69	-0.30011956	-0.686954219	-0.388545216	-0.367107118
SNRNP200_+_96971234.23-P1P2|SNRNP200_-_96971287.23-P1P2	SNRNP200	259	2	232	20	4165	426	4677	245	-0.681573272	-0.395866695	-0.373328339	-0.485299474
SNRNP35_+_123942733.23-P1P2|SNRNP35_-_123942763.23-P1P2	SNRNP35	254	12	329	46	2017	500	1949	294	-0.459679733	-0.328229875	-0.254046918	-0.319053632
SNRNP48_-_7590517.23-P1P2|SNRNP48_-_7590481.23-P1P2	SNRNP48	1028	36	938	171	6398	1363	7905	1115	-0.511818468	-0.291035534	-0.274603849	-0.329950432
SNRPB_+_2451405.23-P1P2|SNRPB_+_2451398.23-P1P2	SNRPB	379	24	283	32	2520	536	2511	347	-0.421593366	-0.358313854	-0.274697241	-0.332902049
SNRPD1_+_19192567.23-P1P2|SNRPD1_+_19192288.23-P1P2	SNRPD1	328	27	303	1	2189	221	2328	232	-0.383145067	-0.782757964	-0.374818472	-0.384115956
SNRPD3_+_24951988.23-P1P2|SNRPD3_+_24951964.23-P1P2	SNRPD3	190	1	172	20	1061	75	927	80	-0.69606846	-0.351854613	-0.421766252	-0.405579665
SNRPE_-_203830935.23-P1P2|SNRPE_-_203830911.23-P1P2	SNRPE	757	195	762	202	2410	541	2538	359	-0.217177711	-0.235859995	-0.267432267	-0.329250395
SNRPF_-_96252774.23-P1P2|SNRPF_-_96252795.23-P1P2	SNRPF	215	9	216	1	1351	155	1449	178	-0.474073696	-0.732924329	-0.357358465	-0.351042088
SNRPG_-_70520494.23-P1P2|SNRPG_+_70520808.23-P1P2	SNRPG	371	1	288	45	4885	531	5438	358	-0.795626429	-0.31179856	-0.365178885	-0.449544189
SNW1_+_78227503.23-P1|SNW1_+_78227421.23-P1	SNW1	104	8	121	8	2028	413	1840	192	-0.382082093	-0.425471573	-0.280497621	-0.376755879
SON_-_34915392.23-P1|SON_+_34915786.23-P1	SON	79	5	63	1	832	176	655	138	-0.402024647	-0.552437522	-0.27503042	-0.266046398
SPC24_+_11266448.23-P1P2|SPC24_+_11266427.23-P1P2	SPC24	187	32	187	30	780	145	809	97	-0.275029734	-0.306576102	-0.292300237	-0.354209683
SPC25_+_169746860.23-P1P2|SPC25_+_169746886.23-P1P2	SPC25	286	20	316	11	1973	247	1861	234	-0.405712423	-0.524094954	-0.34588489	-0.347563244
SPDL1_+_169010824.23-P1P2|SPDL1_-_169010834.23-P1P2	SPDL1	1017	63	1070	122	3838	607	4037	381	-0.428376226	-0.360042877	-0.314658476	-0.392915039
SRBD1_-_45838340.23-P1P2|SRBD1_+_45838356.23-P1P2	SRBD1	935	70	924	130	3045	463	3304	458	-0.400332308	-0.329065243	-0.319904448	-0.332510224
SRFBP1_-_121297703.23-P1P2|SRFBP1_-_121297697.23-P1P2	SRFBP1	2430	197	2358	243	5246	731	6309	514	-0.389707045	-0.375513584	-0.331760336	-0.41614288
SRPRB_+_133524699.23-P1P2|SRPRB_+_133524690.23-P1P2	SRPRB	2590	246	2691	241	9701	788	11432	619	-0.36620275	-0.396248942	-0.404527414	-0.480460908
SRRT_+_100472814.23-P1P2|SRRT_+_100472790.23-P1P2	SRRT	790	51	735	38	2812	300	3017	185	-0.421706694	-0.474380118	-0.367526404	-0.460332913
SRSF1_-_56084574.23-P1P2|SRSF1_-_56084638.23-P1P2	SRSF1	1028	81	874	23	4427	486	5332	399	-0.392967677	-0.571717923	-0.36382429	-0.42943402
SRSF3_-_36562416.23-P1P2|SRSF3_+_36562405.23-P1P2	SRSF3	1156	177	1042	232	4891	970	6018	758	-0.294723832	-0.261693393	-0.284218651	-0.347697553
SSBP1_+_141438412.23-P1P2|SSBP1_-_141438210.23-P1P2	SSBP1	1462	74	1545	71	3244	386	4051	263	-0.458849675	-0.493462072	-0.352903866	-0.451587664
SSRP1_+_57103335.23-P1P2|SSRP1_-_57102976.23-P1P2	SSRP1	1040	78	881	108	5982	878	6728	696	-0.400265642	-0.349204994	-0.324784332	-0.378647339
STAT5B_+_40428264.23-P1P2|STAT5B_+_40428385.23-P1P2	STAT5B	1674	76	1563	64	5509	841	6539	581	-0.475129538	-0.510291722	-0.319478368	-0.402533709
SUPT5H_-_39936298.23-P1P2|SUPT5H_-_39936260.23-P1P2	SUPT5H	324	16	332	1	2814	315	2803	235	-0.455841156	-0.796226289	-0.361065123	-0.411304484
SUPT6H_-_26989444.23-P1P2|SUPT6H_+_26989285.23-P1P2	SUPT6H	245	1	193	20	3273	500	3601	223	-0.733862009	-0.368789512	-0.319292539	-0.458916257
SUPV3L1_+_70940063.23-P1P2|SUPV3L1_+_70940042.23-P1P2	SUPV3L1	1832	149	1695	129	3293	632	4100	580	-0.389002575	-0.419809719	-0.288581449	-0.329378431
SURF6_-_136202973.23-P1P2|SURF6_-_136202964.23-P1P2	SURF6	2788	454	2516	490	7371	1008	8340	711	-0.285962938	-0.281731609	-0.334335351	-0.409084596
TAF1A_-_222763187.23-P1P2|TAF1A_-_222763193.23-P1P2	TAF1A	1812	82	1803	207	4026	573	4478	431	-0.475747027	-0.359460463	-0.328863662	-0.389870009
TAF2_-_120844853.23-P1P2|TAF2_+_120845027.23-P1P2	TAF2	1492	64	1451	77	4734	343	5255	326	-0.483252912	-0.472357965	-0.419732926	-0.458848121
TAMM41_-_11888331.23-P1P2|TAMM41_+_11888312.23-P1P2	TAMM41	681	16	868	34	7915	518	9962	463	-0.566538052	-0.514930284	-0.433572292	-0.504407639
TANGO6_+_68877470.23-P1P2|TANGO6_-_68877660.23-P1P2	TANGO6	2410	46	2190	24	4684	165	6768	205	-0.603252545	-0.701363504	-0.51654694	-0.571347984
TARS_+_33441121.23-P1P2|TARS_+_33441139.23-P1P2	TARS	1919	88	1911	200	6629	1027	7478	693	-0.473887129	-0.373115301	-0.317516539	-0.395951184
TARS2_-_150459943.23-P1P2|TARS2_-_150459929.23-P1P2	TARS2	2146	70	2265	77	4624	520	5134	445	-0.524322138	-0.538147556	-0.36059406	-0.406355856
TBCB_-_36606424.23-P1P2|TBCB_-_36606452.23-P1P2	TBCB	2244	101	1984	111	8383	1217	10136	1102	-0.47688063	-0.465098216	-0.326297471	-0.370900829
TBCD_+_80710368.23-P1P2|TBCD_+_80710388.23-P1P2	TBCD	2469	232	2345	412	6697	1666	8256	1401	-0.367774501	-0.296903642	-0.253713517	-0.300890501
TBCE_-_235530783.23-P1P2|TBCE_+_235530696.23-P1P2	TBCE	1829	14	1732	37	7233	636	8021	362	-0.73264284	-0.604807238	-0.393802493	-0.508937301
TCERG1_-_145826915.23-P1P2|TCERG1_-_145826962.23-P1P2	TCERG1	2444	114	2083	137	3558	817	4265	690	-0.471710269	-0.441434972	-0.26444463	-0.30830544
TCP1_-_160210626.23-P1P2|TCP1_-_160210636.23-P1P2	TCP1	857	29	852	103	2485	175	2775	194	-0.515997489	-0.351204143	-0.423218441	-0.439748754
TEX10_+_103115133.23-P1P2|TEX10_+_103115177.23-P1P2	TEX10	1805	55	1636	69	5593	694	6198	586	-0.533935792	-0.506080513	-0.347388199	-0.392763101
THG1L_-_157158658.23-P1P2|THG1L_-_157158472.23-P1P2	THG1L	1960	72	2019	64	3912	610	5058	444	-0.506639934	-0.548110859	-0.316569082	-0.40436309
THOC2_+_122866836.23-P1P2|THOC2_-_122866493.23-P1P2	THOC2	578	17	536	25	2968	468	3243	435	-0.533549382	-0.487718113	-0.315007068	-0.33766721
THOC5_-_29949679.23-P1P2|THOC5_-_29949705.23-P1P2	THOC5	1074	135	859	41	1598	280	1526	194	-0.323938986	-0.486441152	-0.30063423	-0.345713039
TICRR_+_90118911.23-P1P2|TICRR_-_90118737.23-P1P2	TICRR	363	15	297	25	1811	217	2089	205	-0.481820615	-0.400667932	-0.351723483	-0.38645815
TIMELESS_-_56842914.23-P1P2|TIMELESS_-_56842929.23-P1P2	TIMELESS	1299	113	1199	88	4629	588	5445	625	-0.378674782	-0.424679865	-0.34419916	-0.362267934
TIMM23_+_51623265.23-ENST00000260867.4|TIMM23_+_51623316.23-ENST00000260867.4	TIMM23	690	40	663	35	6136	1259	7120	862	-0.437016811	-0.470994329	-0.27966058	-0.353945684
TIMM23B_-_51371488.23-P1P2|TIMM23B_-_51371437.23-P1P2	TIMM23B	690	40	663	35	6136	1259	7120	862	-0.437016811	-0.470994329	-0.27966058	-0.353945684
TIMM9_-_58893843.23-P1P2|TIMM9_-_58893848.23-P1P2	TIMM9	2648	413	2727	392	8039	1703	9666	1173	-0.2923745	-0.32654023	-0.275376498	-0.353617271
TOP2A_+_38573936.23-P1P2|TOP2A_-_38574150.23-P1P2	TOP2A	1136	61	1037	50	2050	280	2094	122	-0.449628647	-0.48554873	-0.334200356	-0.467966691
TPX2_-_30327161.23-P1P2|TPX2_-_30327106.23-P1P2	TPX2	84	1	116	9	3529	514	3749	224	-0.575153565	-0.403711767	-0.325727309	-0.464550515
TREX2_+_152736011.23-P1P2|TREX2_+_152735963.23-P1P2	TREX2	1998	38	1948	26	6705	768	7260	698	-0.603131784	-0.672686587	-0.358192088	-0.390167768
TRMT10C_-_101280737.23-P1P2|TRMT10C_-_101280733.23-P1P2	TRMT10C	1680	219	1747	324	4442	443	5254	470	-0.318875444	-0.288830305	-0.376744011	-0.401409633
TRMT5_+_61447749.23-P1P2|TRMT5_+_61447755.23-P1P2	TRMT5	2846	112	3091	259	7332	749	8740	619	-0.497064215	-0.40612162	-0.373616766	-0.438221674
TRPM7_+_50978930.23-P1P2|TRPM7_-_50978757.23-P1P2	TRPM7	441	17	411	13	3370	352	3548	435	-0.493226714	-0.5400549	-0.370438775	-0.351804479
TRRAP_-_98476562.23-P1P2|TRRAP_+_98476147.23-P1P2	TRRAP	483	101	586	4	4156	509	4753	408	-0.247725714	-0.744577748	-0.349087098	-0.407852093
TSEN2_-_12526016.23-P1P2|TSEN2_-_12525993.23-P1P2	TSEN2	2430	256	2449	230	6133	774	7396	679	-0.350755914	-0.389201558	-0.345123206	-0.397422918
TSR2_-_54466860.23-P1P2|TSR2_-_54467042.23-P1P2	TSR2	595	22	546	73	3375	671	3732	416	-0.501262843	-0.335833389	-0.283835526	-0.366766713
TTC1_-_159436216.23-P1P2|TTC1_-_159436177.23-P1P2	TTC1	1305	31	1367	51	6388	924	6793	536	-0.569102658	-0.523483915	-0.32675918	-0.421188851
TTC27_+_32853190.23-P1P2|TTC27_+_32853193.23-P1P2	TTC27	1279	20	1170	32	3663	167	4481	192	-0.629006539	-0.567717363	-0.481789226	-0.516739851
TTC4_-_55181504.23-P1P2|TTC4_+_55181518.23-P1P2	TTC4	3245	84	3366	168	7518	668	9136	392	-0.559176899	-0.482393318	-0.392403836	-0.516919725
TTI1_+_36661804.23-P1P2|TTI1_+_36661799.23-P1P2	TTI1	1692	8	1639	37	5764	277	6552	344	-0.797311983	-0.596653976	-0.474992727	-0.485116881
TTK_+_80714409.23-P1P2|TTK_-_80714487.23-P1P2	TTK	444	4	472	24	1795	323	2066	128	-0.685540986	-0.474757213	-0.297100934	-0.458356593
TUBGCP2_+_135122315.23-P1P2|TUBGCP2_-_135122422.23-P1P2	TUBGCP2	1428	102	1148	138	3309	437	3804	328	-0.407958817	-0.35235781	-0.338886617	-0.407063414
TUBGCP3_-_113242418.23-P1P2|TUBGCP3_+_113242380.23-P1P2	TUBGCP3	1469	64	1541	171	2185	240	2350	264	-0.480934278	-0.36435579	-0.363499692	-0.365348398
TUBGCP5_-_22833527.23-P1P2|TUBGCP5_-_22833553.23-P1P2	TUBGCP5	2316	179	2075	22	5369	563	5999	400	-0.396768295	-0.705719159	-0.370038633	-0.447581559
TWISTNB_+_19748588.23-P1P2|TWISTNB_+_19748635.23-P1P2	TWISTNB	165	1	202	1	3415	252	3713	158	-0.675117177	-0.723066202	-0.417136172	-0.517656454
U2AF1_+_44527626.23-P1P2|U2AF1_+_44527620.23-P1P2	U2AF1	442	48	444	59	1698	458	1589	252	-0.344000574	-0.336327987	-0.242652164	-0.31110709
UBA1_-_47053257.23-P1|UBA1_-_47053260.23-P1	UBA1	545	1	324	1	3190	116	3256	98	-0.852934745	-0.792631775	-0.511933321	-0.571538268
UBA3_+_69129471.23-P1P2|UBA3_-_69129485.23-P1P2	UBA3	2713	100	2792	48	5658	390	6407	298	-0.506685923	-0.637774614	-0.4265014	-0.504110283
UMPS_-_124449324.23-P1P2|UMPS_-_124449321.23-P1P2	UMPS	1691	51	1446	20	6423	462	7908	451	-0.535265697	-0.665811681	-0.420808052	-0.472206669
UQCRB_+_97247725.23-P1P2|UQCRB_-_97247570.23-P1P2	UQCRB	3178	145	2847	141	4903	889	5616	703	-0.475271764	-0.483378743	-0.296293467	-0.348657253
UQCRFS1_+_29704033.23-P1P2|UQCRFS1_+_29704050.23-P1P2	UQCRFS1	2186	90	2011	75	5557	590	6789	642	-0.490014013	-0.524413657	-0.368373286	-0.392754141
USP39_-_85843325.23-P1|USP39_+_85843306.23-P1	USP39	268	4	183	21	2656	245	2645	291	-0.61036509	-0.354090221	-0.387039847	-0.368681279
UTP15_-_72861621.23-P1P2|UTP15_-_72861666.23-P1P2	UTP15	872	11	852	11	2140	163	2777	120	-0.655431453	-0.670412874	-0.412595835	-0.51494026
UTP3_+_71554274.23-P1P2|UTP3_-_71554284.23-P1P2	UTP3	1921	16	1824	84	3515	273	4445	300	-0.721275598	-0.493450823	-0.410275292	-0.445551482
UTP6_-_30228710.23-P1P2|UTP6_-_30228722.23-P1P2	UTP6	1316	126	1383	155	3528	597	4327	335	-0.364487313	-0.36280904	-0.305542093	-0.424013293
VARS_+_31763457.23-P1P2|VARS_+_31763097.23-P1P2	VARS	1261	36	1095	76	1912	265	2279	195	-0.542301794	-0.43268809	-0.332205335	-0.407976314
VARS2_-_30882058.23-P1P2|VARS2_+_30882095.23-P1P2	VARS2	2600	36	2537	62	4832	626	5416	329	-0.650309505	-0.586474042	-0.341555141	-0.4621582
VCP_-_35072535.23-P1P2|VCP_+_35072233.23-P1P2	VCP	184	37	155	51	1682	288	1604	417	-0.251557603	-0.202536139	-0.303752536	-0.233591384
VPS29_+_110939870.23-P1P2|VPS29_+_110939846.23-P1P2	VPS29	4174	378	4343	365	11597	1558	12897	1054	-0.373509207	-0.405829792	-0.33677024	-0.415797929
VPS54_+_64246129.23-P1P2|VPS54_+_64246255.23-P1P2	VPS54	752	101	774	100	7991	1025	8529	748	-0.313734287	-0.341355659	-0.342970487	-0.40463933
VPS72_+_151162629.23-P1P2|VPS72_+_151162601.23-P1P2	VPS72	3813	94	3957	101	3832	236	4572	135	-0.566648656	-0.580934505	-0.441474149	-0.574972399
WBP11_-_14956200.23-P1|WBP11_+_14956452.23-P1	WBP11	240	1	163	6	2742	220	2722	236	-0.730795221	-0.506351158	-0.405784552	-0.406027541
WDR12_+_203776353.23-P1P2|WDR12_-_203776953.23-P1P2	WDR12	989	5	904	27	3867	291	4159	167	-0.777734442	-0.553914885	-0.414561297	-0.52683587
WDR3_-_118472399.23-P1P2|WDR3_-_118472430.23-P1P2	WDR3	1318	9	1251	34	4675	375	5839	377	-0.744295368	-0.568906357	-0.406049413	-0.452622112
WDR33_+_128568707.23-P1P2|WDR33_-_128568762.23-P1P2	WDR33	703	146	600	80	3216	625	3283	674	-0.249104738	-0.336389487	-0.286891564	-0.27083198
WDR46_+_33256768.23-P1P2|WDR46_+_33256781.23-P1P2	WDR46	1795	188	1774	215	6798	1336	7720	1163	-0.351441171	-0.351486273	-0.285474903	-0.319599912
WDR5_+_137001236.23-P1P2|WDR5_+_137001233.23-P1P2	WDR5	1970	3	1822	5	5209	173	6341	144	-0.941128836	-0.885135918	-0.524521731	-0.61634107
WDR75_-_190306224.23-P1P2|WDR75_+_190306186.23-P1P2	WDR75	515	26	513	31	1847	195	1946	230	-0.455790088	-0.450554792	-0.368719398	-0.357287095
XRCC5_-_216974154.23-P1P2|XRCC5_+_216974143.23-P1P2	XRCC5	1740	42	1675	58	5592	565	6899	489	-0.567911825	-0.534831312	-0.375047358	-0.438034596
YAE1D1_+_39606256.23-P1P2|YAE1D1_-_39606051.23-P1P2	YAE1D1	1541	167	1214	159	5351	1437	6263	1140	-0.346259019	-0.339815853	-0.243389981	-0.2898386
YTHDC1_-_69215701.23-P1P2|YTHDC1_-_69215755.23-P1P2	YTHDC1	462	107	366	63	2596	448	2759	285	-0.232564532	-0.298301893	-0.302833366	-0.378584051
ZC3H8_+_113012608.23-P1P2|ZC3H8_-_113012642.23-P1P2	ZC3H8	546	5	507	2	4943	222	5312	224	-0.689133232	-0.798720533	-0.484002008	-0.519363614
ZCCHC9_+_80597457.23-P1P2|ZCCHC9_-_80597504.23-P1P2	ZCCHC9	1657	64	1478	62	4288	708	5369	514	-0.498908176	-0.506651294	-0.308882443	-0.390764699
ZMAT2_-_140080067.23-P1|ZMAT2_+_140080265.23-P1	ZMAT2	508	59	576	15	3204	366	3974	318	-0.334495212	-0.570104275	-0.358386051	-0.418796191
ZMAT5_+_30162943.23-P1P2|ZMAT5_-_30162951.23-P1P2	ZMAT5	2395	90	1892	109	5619	405	6573	472	-0.503644933	-0.460746844	-0.420493164	-0.435975344
ZNF236_+_74534757.23-P1P2|ZNF236_-_74534593.23-P1P2	ZNF236	1365	104	1272	99	8038	1359	9813	993	-0.398352872	-0.416183477	-0.305763342	-0.382176451
ZNF574_-_42580351.23-P1|ZNF574_-_42580345.23-P1	ZNF574	3216	576	3151	708	5781	1323	6601	977	-0.271807993	-0.260676252	-0.264946154	-0.322358921
ZNF830_-_33288620.23-P1P2|ZNF830_+_33288601.23-P1P2	ZNF830	69	5	79	15	773	214	713	118	-0.382082093	-0.278044909	-0.238902361	-0.303816471
ZNHIT6_-_86174058.23-P1P2|ZNHIT6_+_86173852.23-P1P2	ZNHIT6	1990	57	1731	57	3890	467	4321	463	-0.543259732	-0.542216438	-0.351758776	-0.373013839
ZNRD1_+_30029087.23-P1P2|ZNRD1_-_30029063.23-P1P2	ZNRD1	1218	36	1142	60	5094	680	5622	686	-0.537124383	-0.473326083	-0.337534	-0.352670947
A1BG_+_58858964.23-P1|A1BG_-_58858788.23-P1	A1BG	951	1310	903	918	1428	2109	1588	1545	0.032613013	-0.037709849	-0.013646848	-0.026239187
A1BG_-_58864840.23-P2|A1BG_-_58864822.23-P2	A1BG	719	876	1010	1038	1910	2713	2229	2364	0.014284414	-0.036104258	-0.018893964	-0.012675907
A1CF_+_52645339.23-P1P2|A1CF_-_52645373.23-P1P2	A1CF	174	89	143	231	567	1072	608	818	-0.114487631	0.0303551	0.019572793	0.024687752
A2M_+_9268487.23-P1P2|A2M_+_9268495.23-P1P2	A2M	506	495	576	602	712	1012	784	1059	-0.018451152	-0.033627411	-0.01884095	0.025328808
A2ML1_+_8975211.23-P1P2|A2ML1_-_8975593.23-P1P2	A2ML1	418	366	330	547	740	1158	822	954	-0.034965081	0.03438058	-0.005880677	0.001480236
A3GALT2_+_33786659.23-ENST00000442999.3|A3GALT2_+_33786649.23-ENST00000442999.3	A3GALT2	594	592	653	755	1269	1846	1415	1752	-0.01567806	-0.018718711	-0.015691868	0.011665234
A4GALT_-_43116819.23-P1P2|A4GALT_+_43116792.23-P1P2	A4GALT	14	75	54	70	1013	1492	1148	1195	0.227168159	-0.002397829	-0.01402821	-0.015615697
A4GNT_+_137851178.23-P1P2|A4GNT_-_137851117.23-P1P2	A4GNT	623	453	668	916	616	980	655	829	-0.062675593	0.006467757	-0.003670627	0.01509062
AAAS_-_53715438.23-P1P2|AAAS_+_53715355.23-P1P2	AAAS	543	763	602	814	1249	1966	1453	1725	0.03554591	0.004390557	-0.005064439	0.005056778
AACS_+_125549983.23-P1P2|AACS_-_125550169.23-P1P2	AACS	683	486	818	666	1378	2013	1880	1633	-0.065907562	-0.070488413	-0.015123096	-0.044070491
AADAC_-_151531954.23-P1P2|AADAC_-_151531939.23-P1P2	AADAC	287	352	410	480	1544	2695	1929	2142	0.015218103	-0.016894643	0.008874327	-0.005452948
AADACL2_+_151451732.23-P1P2|AADACL2_+_151452121.23-P1P2	AADACL2	215	109	217	319	734	1118	822	1226	-0.115954481	0.016593602	-0.009520045	0.040909092
AADACL3_+_12776133.23-P1P2|AADACL3_+_12776213.23-P1P2	AADACL3	734	654	724	865	1302	2561	1591	1692	-0.032385284	-0.01387338	0.024969629	-0.012245682
AADACL4_+_12704573.23-P1P2|AADACL4_+_12704601.23-P1P2	AADACL4	309	196	378	494	851	1301	1132	1165	-0.082884584	-0.000672084	-0.009014415	-0.017406173
AADAT_-_171011368.23-P1P2|AADAT_+_171011325.23-P1P2	AADAT	177	238	193	467	1539	2359	1849	1918	0.02883446	0.090026809	-0.008635687	-0.016161952
AAED1_-_99417574.23-P1P2|AAED1_+_99417525.23-P1P2	AAED1	935	978	942	1063	2284	3486	2447	2403	-0.008467098	-0.02229731	-0.009202445	-0.024776576
AAGAB_-_67546997.23-P1P2|AAGAB_-_67546928.23-P1P2	AAGAB	335	76	399	81	497	423	698	460	-0.23520946	-0.274394918	-0.087882228	-0.08741115
AAK1_-_69870791.23-P1P2|AAK1_-_69870794.23-P1P2	AAK1	463	566	570	966	1465	2114	1573	2010	0.014765159	0.037728988	-0.016774374	0.016624101
AAMDC_-_77532236.23-P1P2|AAMDC_-_77532222.23-P1P2	AAMDC	459	741	555	692	1033	1305	1271	1325	0.056231142	-0.007583991	-0.03470464	-0.015381945
AAMP_+_219134841.23-P1P2|AAMP_+_219134851.23-P1P2	AAMP	115	37	139	49	737	165	806	125	-0.18184741	-0.192337812	-0.26735476	-0.314087184
AANAT_-_74463789.23-P1P2|AANAT_+_74463735.23-P1P2	AANAT	473	603	497	520	861	1474	858	1194	0.021021635	-0.033468503	0.006233348	0.030015926
AAR2_-_34824434.23-P1P2|AAR2_-_34824425.23-P1P2	AAR2	431	238	395	305	863	352	1185	206	-0.103583146	-0.078253995	-0.186880513	-0.296557893
AARD_+_117950477.23-P1P2|AARD_+_117950489.23-P1P2	AARD					1500	2902	1698	1691			0.022744134	-0.022572609
AARS2_+_44281027.23-P1P2|AARS2_+_44281044.23-P1P2	AARS2	422	30	445	80	2032	356	2681	337	-0.40547723	-0.292299192	-0.300735756	-0.347791562
AARSD1_-_41116425.23-P1|AARSD1_+_41116412.23-P1	AARSD1	497	855	598	830	469	991	574	664	0.065721797	0.008248182	0.034525328	0.000955054
AARSD1_+_41132061.23-P2|AARSD1_-_41132037.23-P2	AARSD1	957	892	1039	1071	2940	4367	3660	3713	-0.025668528	-0.035662791	-0.012859092	-0.019661777
AASDH_-_57253588.23-P1P2|AASDH_+_57253570.23-P1P2	AASDH	16	57	59	42	330	673	339	545	0.168108246	-0.089386891	0.029687759	0.052598873
AASDHPPT_+_105948405.23-P1P2|AASDHPPT_+_105948450.23-P1P2	AASDHPPT	477	74	484	117	413	558	449	262	-0.291784743	-0.24907665	-0.025704752	-0.106422763
AASS_+_121784247.23-P1P2|AASS_+_121784219.23-P1P2	AASS	1032	1362	1094	1446	930	1786	1113	1517	0.026226999	0.001059819	0.021722262	0.026759871
AATF_-_35306286.23-P1P2|AATF_-_35306346.23-P1P2	AATF	268	2	202	29	1143	293	1068	206	-0.686655524	-0.322770035	-0.249388537	-0.280217417
AATK_-_79139957.23-ENST00000326724.4|AATK_+_79139571.23-ENST00000326724.4	AATK	1024	687	747	871	935	1348	1206	1171	-0.074713865	-0.017469299	-0.01691107	-0.026552633
ABAT_-_8768533.23-P1|ABAT_-_8768504.23-P1	ABAT	721	643	599	918	1118	2088	1770	1693	-0.032249549	0.022880342	0.017976084	-0.028916562
ABAT_+_8807464.23-P2|ABAT_+_8807450.23-P2	ABAT	493	536	494	663	1420	2374	1935	1832	-0.002710295	0.003275051	0.003061925	-0.030524177
ABCA1_-_107690385.23-P1P2|ABCA1_-_107690389.23-P1P2	ABCA1	441	81	407	58	1496	199	1610	108	-0.266764291	-0.32598079	-0.337594455	-0.445647873
ABCA10_+_67224811.23-P1P2|ABCA10_-_67224823.23-P1P2	ABCA10	414	304	541	916	874	1602	871	1260	-0.061169212	0.037585929	0.015435621	0.036110545
ABCA12_+_216003308.23-P1P2|ABCA12_+_216003314.23-P1P2	ABCA12	672	571	721	853	1419	2591	1588	1532	-0.039460026	-0.015323052	0.014945461	-0.027567717
ABCA13_+_48211097.23-P1P2|ABCA13_-_48211093.23-P1P2	ABCA13	772	1239	919	1270	1072	1795	1371	1607	0.055404483	0.007629923	0.003259712	0.003048243
ABCA2_-_139922596.23-P1P2|ABCA2_+_139922669.23-P1P2	ABCA2	705	929	848	1228	1042	1886	1271	1399	0.025980335	0.014534656	0.013747375	-0.006838209
ABCA3_+_2390611.23-P1P2|ABCA3_-_2390704.23-P1P2	ABCA3	691	553	525	427	686	624	764	597	-0.048393226	-0.07061908	-0.078945072	-0.060670534
ABCA4_-_94586658.23-P1P2|ABCA4_+_94586668.23-P1P2	ABCA4	482	341	567	675	938	1671	920	1091	-0.066730783	-0.01441167	0.011599946	0.004870802
ABCA5_-_67322891.23-P1P2|ABCA5_-_67323220.23-P1P2	ABCA5	919	753	1009	541	1703	1000	1984	739	-0.04489253	-0.132149667	-0.137919787	-0.17716209
ABCA6_+_67138008.23-P1P2|ABCA6_+_67137842.23-P1P2	ABCA6	389	448	453	489	1322	2047	1572	1470	0.005864267	-0.028862783	-0.007276234	-0.032470661
ABCA7_-_1040133.23-P1|ABCA7_+_1040185.23-P1	ABCA7	965	1043	901	1004	1323	1132	1369	1167	-0.003578248	-0.024159227	-0.087197534	-0.047019646
ABCA7_+_1041311.23-P2|ABCA7_-_1041459.23-P2	ABCA7					949	1543	1048	1083			-0.000708881	-0.016759483
ABCA8_+_66951401.23-P1P2|ABCA8_-_66951525.23-P1P2	ABCA8	386	355	460	730	119	192	83	50	-0.027644806	0.028003528	-0.00212074	-0.100428203
ABCA9_-_67057053.23-P1P2|ABCA9_+_67057085.23-P1P2	ABCA9	156	130	193	402	803	1428	918	1264	-0.042214311	0.06792346	0.011353285	0.028349627
ABCB1_-_87342674.23-ENST00000265724.3|ABCB1_-_87342657.23-ENST00000265724.3	ABCB1	709	825	806	1199	819	1739	853	1033	0.007425493	0.018504468	0.035246087	0.008167249
ABCB10_+_229694285.23-P1P2|ABCB10_-_229694297.23-P1P2	ABCB10	207	2	226	1	660	123	896	132	-0.648247383	-0.739583884	-0.291828833	-0.322215515
ABCB11_-_169887784.23-P1P2|ABCB11_-_169887796.23-P1P2	ABCB11	410	254	480	673	856	1362	989	1213	-0.08646311	0.009725561	-0.003629898	0.010167225
ABCB4_+_87104933.23-P1P2|ABCB4_-_87104975.23-P1P2	ABCB4	310	429	444	619	1148	1995	1182	1706	0.033212172	0.008880396	0.008268651	0.035766461
ABCB5_+_20687051.23-P1P2|ABCB5_+_20687242.23-P1P2	ABCB5	263	162	269	282	514	834	543	651	-0.087190317	-0.03319135	-0.001033139	0.006568242
ABCB6_-_220083604.23-P1P2|ABCB6_+_220083613.23-P1P2	ABCB6	1155	1530	1239	1319	1803	2747	2091	2318	0.026784719	-0.030900862	-0.009446326	-0.005715874
ABCB7_+_74375885.23-P1P2|ABCB7_-_74376019.23-P1P2	ABCB7	261	46	312	39	1315	587	1343	414	-0.271783297	-0.344250099	-0.174815868	-0.206803101
ABCB8_-_150725551.23-P1P2|ABCB8_-_150725580.23-P1P2	ABCB8	632	561	699	889	754	1161	875	953	-0.032942843	-0.004645472	-0.008055779	-0.008503396
ABCB9_+_123450970.23-P1|ABCB9_-_123450999.23-P1	ABCB9	160	180	116	210	2027	3224	2693	2807	0.002312268	0.047022977	-0.003646435	-0.015402558
ABCB9_-_123465699.23-P2|ABCB9_-_123465738.23-P2	ABCB9	1145	1513	1101	1383	1176	1945	1494	1657	0.026414665	-0.006462141	0.001601779	-0.005641877
ABCC1_+_16043482.23-P1P2|ABCC1_-_16043440.23-P1P2	ABCC1	525	916	461	633	1167	1868	1388	1520	0.067832964	0.006639321	-0.002806735	-0.007640238
ABCC10_+_43395315.23-P1P2|ABCC10_-_43395343.23-P1P2	ABCC10	168	228	151	295	652	1203	769	1101	0.030199985	0.058374553	0.016301134	0.034477572
ABCC11_-_48278125.23-P1|ABCC11_+_48278130.23-P1	ABCC11	557	844	680	1162	735	1186	993	882	0.046800592	0.038968665	-0.001749168	-0.040552557
ABCC11_+_48281428.23-P2|ABCC11_+_48281345.23-P2	ABCC11	457	548	492	603	994	1758	958	1128	0.011890896	-0.010125954	0.01062885	0.00375226
ABCC12_-_48180643.23-ENST00000311303.3|ABCC12_-_48180648.23-ENST00000311303.3	ABCC12	761	888	748	859	456	787	387	624	0.007846783	-0.01971509	0.007265711	0.053082334
ABCC2_+_101542981.23-P1P2|ABCC2_-_101542705.23-P1P2	ABCC2	410	207	438	632	524	1077	575	696	-0.116888961	0.013954338	0.030813971	0.008075824
ABCC3_+_48712248.23-P1P2|ABCC3_+_48712270.23-P1P2	ABCC3	804	1450	1078	1136	2084	3190	2749	3094	0.072815148	-0.032402954	-0.008812816	-0.00332898
ABCC4_+_95953430.23-P1P2|ABCC4_+_95953641.23-P1P2	ABCC4	1288	1237	1686	1964	984	1892	1092	964	-0.021204291	-0.017594352	0.021889759	-0.041518767
ABCC5_-_183735467.23-P1P2|ABCC5_+_183735648.23-P1P2	ABCC5	1197	1851	1447	1843	2309	2931	2609	2660	0.04988237	-0.004407087	-0.034043561	-0.018878499
ABCC6_-_16317247.23-ENST00000205557.7|ABCC6_-_16317344.23-ENST00000205557.7	ABCC6	651	639	657	1000	2332	3738	2540	2646	-0.01794954	0.021874208	-0.002597401	-0.015493208
ABCC8_+_17498387.23-P1P2|ABCC8_+_17498394.23-P1P2	ABCC8	563	698	581	790	1562	2695	1757	1932	0.016874202	0.005211918	0.007312557	-0.006993236
ABCC9_+_22094309.23-P1P2|ABCC9_+_22094148.23-P1P2	ABCC9	794	574	916	645	1073	923	1237	692	-0.063559565	-0.091923954	-0.086475476	-0.113208135
ABCD1_-_152990338.23-P1P2|ABCD1_-_152990342.23-P1P2	ABCD1	549	705	654	731	935	1819	1264	1441	0.022116363	-0.023713266	0.023467258	-0.001319603
ABCD2_+_40013594.23-P1P2|ABCD2_-_40013610.23-P1P2	ABCD2	143	132	172	304	998	1528	1088	1327	-0.027042967	0.043672847	-0.008806218	0.009292983
ABCD3_+_94884002.23-P1P2|ABCD3_+_94884032.23-P1P2	ABCD3	1035	1320	893	1085	1668	2838	2159	2440	0.021119458	-0.011384513	0.005433695	-0.002681958
ABCD4_+_74769611.23-P1P2|ABCD4_-_74769729.23-P1P2	ABCD4	435	405	425	493	879	943	929	1119	-0.02582204	-0.018251292	-0.056726638	0.007324054
ABCF1_+_30539238.23-P1|ABCF1_+_30539469.23-P1	ABCF1	259	8	281	35	1141	220	1254	56	-0.517498479	-0.344407435	-0.287635769	-0.50835509
ABCF2_+_150924287.23-P1P2|ABCF2_+_150924236.23-P1P2	ABCF2	1105	1161	1244	1670	1315	1626	1432	1875	-0.007798532	0.003358173	-0.037589121	0.020456563
ABCF3_-_183903991.23-P1P2|ABCF3_-_183904021.23-P1P2	ABCF3	973	1187	993	1369	1863	2977	2487	2197	0.014487439	0.007281549	-0.00302023	-0.041420898
ABCG1_-_43639282.23-P1P2|ABCG1_+_43639503.23-P1P2	ABCG1	988	1677	1184	1387	2133	3576	2690	3104	0.063779275	-0.016769437	0.00345155	0.000590659
ABCG2_+_89080044.23-P1P2|ABCG2_+_89079974.23-P1P2	ABCG2	699	1138	797	769	574	952	818	859	0.057530893	-0.045422184	0.001930458	-0.014237877
ABCG4_+_119019794.23-P1P2|ABCG4_-_119019798.23-P1P2	ABCG4	634	878	728	777	1463	2833	1750	1759	0.03338655	-0.030526524	0.022865967	-0.021116488
ABCG5_+_44065865.23-P1P2|ABCG5_-_44065840.23-P1P2	ABCG5	386	498	382	563	398	493	423	503	0.022786103	0.01706563	-0.037395894	0.005269894
ABCG8_+_44066166.23-P1P2|ABCG8_-_44066172.23-P1P2	ABCG8	1008	1209	1081	1466	702	1300	986	1159	0.011955318	0.004854319	0.016800562	0.003486181
ABHD1_-_27346733.23-P1P2|ABHD1_+_27346724.23-P1P2	ABHD1	1201	1136	1044	1464	1556	2482	1810	2253	-0.023477965	0.009795851	-0.003265705	0.012504518
ABHD10_-_111697914.23-P1P2|ABHD10_-_111697877.23-P1P2	ABHD10	219	242	333	440	971	1644	1081	1454	-0.000325021	0.00093651	0.004747758	0.024676567
ABHD11_-_73153094.23-P1P2|ABHD11_+_73152963.23-P1P2	ABHD11	99	74	150	225	1128	1305	1152	1012	-0.058139751	0.019465574	-0.046555976	-0.042289299
ABHD12_+_25371393.23-P1P2|ABHD12_+_25371436.23-P1P2	ABHD12	480	729	705	718	1356	1795	1653	1722	0.047129097	-0.037445352	-0.028401096	-0.015493028
ABHD12B_-_51338864.23-P1P2|ABHD12B_-_51338885.23-P1P2	ABHD12B	834	704	771	1008	1994	3082	2577	3592	-0.040449838	-0.000567295	-0.007505814	0.030305576
ABHD13_-_108870892.23-P1P2|ABHD13_+_108870795.23-P1P2	ABHD13	723	461	697	509	1402	1554	1684	1276	-0.082265978	-0.086528689	-0.052323251	-0.065542487
ABHD14A_+_52009255.23-P1P2|ABHD14A_+_52009194.23-P1P2	ABHD14A	675	776	692	945	980	1683	1077	1417	0.005620999	0.005860104	0.006664368	0.021206741
ABHD14B_-_52007985.23-P1|ABHD14B_-_52008040.23-P1	ABHD14B	2131	2574	2097	2978	4368	7077	5347	5656	0.013019927	0.011682708	-0.001142028	-0.013085805
ABHD14B_+_52017350.23-P2|ABHD14B_-_52016965.23-P2	ABHD14B	702	1020	960	1216	1483	2465	1510	1877	0.040558362	-0.005232519	0.002282556	0.012285591
ABHD15_-_27893980.23-P1P2|ABHD15_-_27894008.23-P1P2	ABHD15	762	366	640	386	1688	1627	1806	1325	-0.124481935	-0.114731661	-0.071152055	-0.070616169
ABHD16A_-_31670764.23-P1P2|ABHD16A_+_31670831.23-P1P2	ABHD16A	379	305	519	614	1856	2750	2072	2119	-0.047521766	-0.015339696	-0.013203368	-0.018395898
ABHD16B_-_62492870.23-P1P2|ABHD16B_+_62492837.23-P1P2	ABHD16B	246	254	318	527	2326	4144	2810	2706	-0.01041473	0.03434337	0.011648835	-0.02785421
ABHD17A_-_1885483.23-P1P2|ABHD17A_+_1885470.23-P1P2	ABHD17A	886	1301	1087	1387	1306	2076	1573	1919	0.04214606	-0.004145615	-0.003739839	0.009338739
ABHD17B_+_74526089.23-P1P2|ABHD17B_+_74525862.23-P1P2	ABHD17B	222	277	195	299	159	304	199	238	0.01774831	0.022778548	0.020792428	0.006104262
ABHD17C_+_80987703.23-P1P2|ABHD17C_+_80987662.23-P1P2	ABHD17C	1001	858	1010	990	2022	2625	2375	2188	-0.038172357	-0.043095928	-0.031017548	-0.034819784
ABHD2_-_89631760.23-P1P2|ABHD2_-_89631738.23-P1P2	ABHD2	1276	1793	1336	1512	756	1236	909	916	0.03559305	-0.021862469	2.07E-05	-0.020717486
ABHD3_-_19284770.23-P1P2|ABHD3_+_19284534.23-P1P2	ABHD3	588	290	622	289	1074	427	1057	382	-0.120480433	-0.153173103	-0.190365637	-0.181783846
ABHD4_-_23067199.23-P1P2|ABHD4_+_23067144.23-P1P2	ABHD4	1148	1844	1254	1310	1943	3486	2693	2823	0.055553781	-0.033689539	0.012588765	-0.014508648
ABHD5_-_43732464.23-P1P2|ABHD5_-_43732422.23-P1P2	ABHD5	545	686	595	670	873	1179	973	1045	0.019132158	-0.022621904	-0.025717447	-0.010702875
ABHD6_+_58223718.23-P1P2|ABHD6_-_58223594.23-P1P2	ABHD6	973	1261	1109	1594	1537	2155	1812	2378	0.023511981	0.013443292	-0.020650157	0.020822444
ABHD8_-_17414201.23-P1P2|ABHD8_-_17414169.23-P1P2	ABHD8	856	983	874	1160	1526	2721	1952	2204	0.005462796	0.001662175	0.011748472	-0.002829643
ABI1_-_27149837.23-P1P2|ABI1_-_27149855.23-P1P2	ABI1	884	912	828	902	619	1150	784	715	-0.010523302	-0.027503723	0.017223304	-0.036397776
ABI2_-_204193288.23-P1P2|ABI2_+_204193079.23-P1P2	ABI2	487	348	628	437	1257	75	1493	1554	-0.06524292	-0.093639279	-0.444602528	-0.015627056
ABI3_-_47288028.23-P1P2|ABI3_+_47287798.23-P1P2	ABI3	398	650	536	602	498	1131	620	581	0.057937505	-0.023007613	0.044252699	-0.032127443
ABI3BP_-_100712220.23-P1P2|ABI3BP_-_100712267.23-P1P2	ABI3BP	808	577	682	977	867	1472	942	1177	-0.065389514	0.012926093	0.005115152	0.01308346
ABL1_-_133589228.23-ENST00000372348.2|ABL1_-_133589216.23-ENST00000372348.2	ABL1	666	862	584	609	1052	1530	1246	1636	0.023300342	-0.033956721	-0.015727992	0.020889675
ABL2_-_179112151.23-P1|ABL2_-_179112154.23-P1	ABL2	266	136	238	310	324	451	335	348	-0.11482985	-0.001217854	-0.021717318	-0.015950789
ABL2_-_179198834.23-P2|ABL2_+_179198736.23-P2	ABL2	964	928	957	1428	1346	1880	1488	1870	-0.020853296	0.018967022	-0.021169006	0.014005591
ABLIM1_+_116418018.23-ENST00000277895.5|ABLIM1_-_116417810.23-ENST00000277895.5	ABLIM1	387	455	529	621	1231	1905	1484	1461	0.008942513	-0.016482377	-0.007356308	-0.024378861
ABLIM2_+_8160523.23-P1P2|ABLIM2_+_8160328.23-P1P2	ABLIM2	593	563	910	942	1576	2768	2002	2063	-0.022915141	-0.035039293	0.009712527	-0.01720327
ABLIM3_-_148521229.23-P1P2|ABLIM3_+_148521102.23-P1P2	ABLIM3	659	706	732	907	1935	2820	2181	2207	-0.004901481	-0.008494992	-0.01543277	-0.020059484
ABO_+_136150601.23-P1|ABO_+_136150587.23-P1	ABO	764	1033	850	992	1241	1954	1473	1882	0.029825262	-0.01733152	-0.005023825	0.016604355
ABO_-_136130921.23-P2|ABO_-_136130959.23-P2	ABO	395	357	460	668	1296	1896	1375	1345	-0.030241547	0.014902586	-0.014926837	-0.025391123
ABR_+_1083212.23-P1P2|ABR_-_1083256.23-P1P2	ABR	409	512	438	479	1331	1777	1746	1761	0.018296317	-0.026944339	-0.027252067	-0.020577996
ABRA_+_107782422.23-P1P2|ABRA_+_107782407.23-P1P2	ABRA	932	904	813	1092	826	1291	970	1205	-0.019725858	0.003422386	-0.00603846	0.012175809
ABRACL_+_139349876.23-P1P2|ABRACL_+_139349879.23-P1P2	ABRACL	526	440	666	887	1594	2359	1699	2047	-0.041782278	0.002160112	-0.013367096	0.007376928
ABT1_-_26597263.23-P1P2|ABT1_+_26597412.23-P1P2	ABT1	443	145	472	165	978	917	1152	649	-0.181281967	-0.194922865	-0.074866641	-0.112095466
ABTB1_+_127391828.23-P1P2|ABTB1_+_127391831.23-P1P2	ABTB1	700	876	720	736	1549	2187	1734	1942	0.018278458	-0.036898039	-0.019711573	-0.00410952
ABTB2_-_34379521.23-P1P2|ABTB2_-_34379465.23-P1P2	ABTB2	703	753	653	727	1376	2320	1603	1728	-0.004927889	-0.024297377	0.004201832	-0.010116773
ACAA1_-_38178575.23-P1P2|ACAA1_+_38178488.23-P1P2	ACAA1	903	1028	897	1012	1909	3340	2192	2572	0.004167268	-0.022330266	0.00920084	0.003218223
ACAA2_-_47339855.23-P1P2|ACAA2_-_47339858.23-P1P2	ACAA2	957	1044	1031	1707	1132	1653	1136	1127	-0.002193283	0.034331433	-0.015181961	-0.023173361
ACACA_-_35715847.23-P1P2|ACACA_-_35716002.23-P1P2	ACACA	588	276	513	413	1850	2189	2528	1750	-0.127844115	-0.072123751	-0.043517045	-0.07976254
ACACB_+_109569170.23-P1|ACACB_+_109569160.23-P1	ACACB	252	206	279	358	1411	2483	1756	2040	-0.045144836	-0.003405041	0.009968853	0.001649668
ACACB_-_109592519.23-P2|ACACB_-_109592496.23-P2	ACACB	618	699	630	877	876	1695	980	1220	0.003190788	0.008687573	0.022731688	0.012508574
ACAD10_-_112123907.23-P1P2|ACAD10_-_112123894.23-P1P2	ACAD10	512	507	472	702	1207	2441	1662	1657	-0.016637974	0.018431792	0.028708821	-0.022396805
ACAD11_+_132379379.23-P1P2|ACAD11_-_132379444.23-P1P2	ACAD11	473	507	629	602	1363	2127	1705	1975	-0.004829302	-0.046617218	-0.006224659	0.001192013
ACAD8_-_134123507.23-P1P2|ACAD8_-_134123448.23-P1P2	ACAD8	915	1155	1034	1363	1696	2661	2254	2539	0.019578613	0.000658059	-0.005489192	-0.003198852
ACAD9_-_128598499.23-P1P2|ACAD9_-_128598508.23-P1P2	ACAD9	510	316	542	366	1181	1090	1472	775	-0.086483742	-0.098049421	-0.076994139	-0.122755007
ACADL_-_211090095.23-P1P2|ACADL_-_211090048.23-P1P2	ACADL	589	631	510	645	1833	2816	2144	2483	-0.004905061	-0.005489687	-0.008326396	0.001161722
ACADM_-_76190475.23-P1P2|ACADM_+_76190432.23-P1P2	ACADM	793	551	752	984	1279	2481	1182	1723	-0.069468244	-0.00044225	0.023093547	0.037325536
ACADS_+_121164090.23-P1P2|ACADS_-_121163671.23-P1P2	ACADS	689	397	617	677	1982	1262	2145	1097	-0.097352011	-0.026445879	-0.127017607	-0.12735077
ACADSB_-_124768552.23-P1P2|ACADSB_+_124768710.23-P1P2	ACADSB	612	683	633	818	1566	2405	1893	2087	0.001192211	-0.002296066	-0.008376345	-0.006581151
ACADVL_-_7123283.23-P1P2|ACADVL_-_7123242.23-P1P2	ACADVL	826	665	894	1002	1447	2336	1810	1759	-0.047511144	-0.02330207	-0.001650675	-0.026417192
ACAN_-_89346701.23-P1P2|ACAN_+_89346671.23-P1P2	ACAN	234	196	229	271	1099	2027	1457	1695	-0.041517352	-0.015350146	0.016289324	0.001865967
ACAP1_+_7239854.23-P1P2|ACAP1_+_7239956.23-P1P2	ACAP1	348	384	521	430	813	1641	1042	967	-0.00051357	-0.068458213	0.0284201	-0.033663549
ACAP2_+_195163707.23-P1P2|ACAP2_+_195163701.23-P1P2	ACAP2	1096	1681	1413	1792	1607	2400	1962	2154	0.048656489	-0.005040661	-0.012139286	-0.007241749
ACAP3_+_1243258.23-P1P2|ACAP3_+_1243337.23-P1P2	ACAP3	607	816	561	614	1590	2373	1984	2296	0.028951579	-0.0268211	-0.012231052	0.001044418
ACAT1_+_107992310.23-P1P2|ACAT1_+_107992321.23-P1P2	ACAT1	1149	1280	1068	1413	1674	2943	1936	2248	0.000936244	0.001201849	0.009846562	0.001573083
ACAT2_-_160183054.23-P1P2|ACAT2_-_160183095.23-P1P2	ACAT2	616	644	670	931	1958	3311	2071	2368	-0.00854698	0.008424894	0.004609992	-0.000848456
ACBD3_-_226374403.23-P1P2|ACBD3_+_226374329.23-P1P2	ACBD3	788	881	790	1118	1023	1315	1268	1117	0.001465927	0.011134244	-0.032365849	-0.041854571
ACBD4_-_43213072.23-P1|ACBD4_-_43213050.23-P1	ACBD4	932	1481	906	1595	1219	2709	1560	2151	0.053934158	0.043390981	0.041416201	0.028590295
ACBD4_+_43210042.23-P2|ACBD4_+_43210060.23-P2	ACBD4	699	922	771	916	1246	2358	1444	1783	0.026126628	-0.014699727	0.019762205	0.011233543
ACBD5_+_27529701.23-P1P2|ACBD5_+_27529710.23-P1P2	ACBD5	959	912	752	899	1689	2549	1957	2149	-0.022672054	-0.013782283	-0.01072751	-0.007205959
ACBD6_-_180471707.23-P1P2|ACBD6_+_180471617.23-P1P2	ACBD6	954	1149	914	1428	1025	1757	1171	1236	0.012574402	0.025755333	0.006415512	-0.013430928
ACBD7_+_15130776.23-P1P2|ACBD7_+_15130765.23-P1P2	ACBD7	523	675	661	836	1599	2655	2093	2491	0.022863762	-0.005470678	0.002142513	0.005453445
ACCS_+_44088091.23-P1P2|ACCS_-_44088090.23-P1P2	ACCS	883	882	896	1079	1399	2363	1850	1842	-0.015344247	-0.012698647	0.004443444	-0.022604511
ACCSL_-_44069582.23-ENST00000378832.1|ACCSL_+_44069616.23-ENST00000378832.1	ACCSL	288	489	428	413	852	1507	957	1106	0.063676994	-0.045403391	0.010631815	0.000820406
ACD_-_67694143.23-P1P2|ACD_+_67694124.23-P1P2	ACD	112	161	100	71	1137	915	1279	657	0.038620967	-0.090171793	-0.095452281	-0.126610563
ACE_-_61554428.23-P1|ACE_+_61554448.23-P1	ACE	462	691	499	587	1940	3588	2328	2600	0.04484134	-0.0161785	0.016684434	-0.004545123
ACE_-_61562443.23-P2|ACE_+_61562272.23-P2	ACE	567	779	680	1131	971	2149	1372	1618	0.032193654	0.034975106	0.040845802	0.004006197
ACE2_-_15619013.23-P1P2|ACE2_-_15618975.23-P1P2	ACE2	518	501	629	1240	790	1333	849	932	-0.020149034	0.060070611	0.004275767	-0.007265027
ACER1_-_6333545.23-P1P2|ACER1_-_6333558.23-P1P2	ACER1	666	774	793	831	317	441	309	320	0.00723779	-0.033232141	-0.021798014	-0.016437236
ACER2_+_19409007.23-P1P2|ACER2_-_19409274.23-P1P2	ACER2	1125	1566	1354	2080	1605	2452	1657	1905	0.034182801	0.023278063	-0.009082525	7.59E-06
ACER3_-_76572003.23-P1P2|ACER3_-_76571978.23-P1P2	ACER3	663	653	864	1177	2039	3259	2251	2426	-0.017441522	0.005509968	-0.0029865	-0.010149101
ACHE_+_100493473.23-P1|ACHE_-_100493486.23-P1	ACHE	601	564	617	779	1668	2468	2239	2685	-0.024648563	-0.005729809	-0.01339397	0.006644061
ACHE_+_100494559.23-P2|ACHE_-_100494578.23-P2	ACHE	86	214	126	179	900	1330	1017	1040	0.119943774	0.0114117	-0.013583813	-0.018408073
ACIN1_-_23540292.23-P2|ACIN1_-_23540730.23-P2	ACIN1	278	131	462	308	716	485	603	323	-0.126948208	-0.099917579	-0.118623847	-0.119911589
ACKR2_-_42851020.23-P1P2|ACKR2_-_42850976.23-P1P2	ACKR2	409	269	366	613	520	899	617	904	-0.077562836	0.035929137	0.007512455	0.038089031
ACKR3_+_237478500.23-P1|ACKR3_-_237478615.23-P1	ACKR3	430	453	522	858	1469	2290	1563	1592	-0.007410773	0.033202558	-0.006364211	-0.019032583
ACKR3_-_237476505.23-P2|ACKR3_-_237476493.23-P2	ACKR3	1217	1337	1207	1877	783	1476	743	828	-0.001141668	0.025080573	0.019204291	-0.004903496
ACKR4_-_132316171.23-P1P2|ACKR4_-_132316167.23-P1P2	ACKR4	532	578	574	592	308	576	421	511	-0.002812079	-0.035586073	0.018009918	0.008491415
ACLY_-_40074817.23-P1P2|ACLY_-_40075227.23-P1P2	ACLY	347	241	297	211	765	773	763	580	-0.069427822	-0.090475234	-0.064791512	-0.065002073
ACMSD_+_135596183.23-P1P2|ACMSD_-_135596200.23-P1P2	ACMSD	86	79	127	304	1100	1875	1223	1663	-0.027702681	0.088204428	0.005662337	0.026392294
ACN9_+_96747061.23-P1P2|ACN9_-_96747046.23-P1P2	ACN9	1116	1484	1111	1275	1097	1928	1269	1258	0.027354166	-0.019807242	0.00978661	-0.023291685
ACO1_+_32384680.23-P1P2|ACO1_-_32384733.23-P1P2	ACO1	736	852	808	863	812	1415	844	1137	0.006655137	-0.030419939	0.008620154	0.024911971
ACO2_+_41865228.23-P1P2|ACO2_+_41865345.23-P1P2	ACO2	604	411	512	492	2290	3220	2553	2638	-0.072555207	-0.046020635	-0.020254874	-0.01677227
ACOT1_-_74004062.23-P1P2|ACOT1_-_74004076.23-P1P2	ACOT1	1136	1531	1286	1782	1416	2053	1638	1702	0.029357303	0.008043487	-0.016136629	-0.015896615
ACOT11_+_55007963.23-P2|ACOT11_-_55013950.23-P1	ACOT11	595	264	582	407	1390	1125	1724	773	-0.136222823	-0.092901327	-0.094689154	-0.148007135
ACOT11_+_55007963.23-P2|ACOT11_-_55008004.23-P2	ACOT11	615	442	656	331	1390	1125	1724	773	-0.06441161	-0.141034872	-0.094689154	-0.148007135
ACOT12_-_80689897.23-P1P2|ACOT12_+_80689672.23-P1P2	ACOT12	630	566	663	985	1918	3346	2263	2532	-0.031147388	0.018300634	0.008808924	-0.004259697
ACOT13_-_24667371.23-P1P2|ACOT13_-_24667329.23-P1P2	ACOT13	774	940	976	1527	1011	780	1402	949	0.013810136	0.025965559	-0.101128336	-0.083266099
ACOT2_+_74035740.23-P1P2|ACOT2_-_74036051.23-P1P2	ACOT2	575	578	478	688	1276	2199	1477	1560	-0.014399375	0.013595093	0.007148284	-0.013327183
ACOT4_+_74058647.23-P1P2|ACOT4_+_74058635.23-P1P2	ACOT4	123	57	165	105	558	27	506	63	-0.128655053	-0.106445614	-0.469869898	-0.347532876
ACOT6_+_74077704.23-P1P2|ACOT6_+_74077926.23-P1P2	ACOT6	945	1231	1023	1262	787	1442	883	966	0.024275121	-0.009134354	0.015378075	-0.007804255
ACOT7_-_6453406.23-P1P2|ACOT7_-_6453369.23-P1P2	ACOT7	1315	1869	1206	1604	1727	2140	1857	1769	0.037296717	0.00198334	-0.037296895	-0.029556781
ACOT8_-_44486001.23-P1P2|ACOT8_-_44485992.23-P1P2	ACOT8	840	1002	869	1287	1261	2471	1493	1992	0.011133686	0.017854003	0.024458736	0.023416251
ACOT9_+_23761360.23-P1P2|ACOT9_-_23761316.23-P1P2	ACOT9	1026	1571	1318	1406	942	2089	1219	1435	0.048402954	-0.030595538	0.041113543	0.003723017
ACOX1_+_73975227.23-P1P2|ACOX1_-_73975169.23-P1P2	ACOX1	515	691	590	717	1148	2526	1448	1737	0.028655122	-0.011369314	0.040073692	0.006688762
ACOX2_+_58522893.23-P1|ACOX2_+_58522888.23-P1	ACOX2	801	414	847	585	1092	1841	1341	1423	-0.11356971	-0.094769858	0.004179561	-0.012592155
ACOX2_+_58512428.23-P2|ACOX2_-_58512435.23-P2	ACOX2	574	549	649	768	1012	1441	1128	1295	-0.021813958	-0.015291633	-0.018581436	-0.000219663
ACOX3_+_8430113.23-P1|ACOX3_-_8430129.23-P1	ACOX3	521	513	494	958	904	1584	1153	1427	-0.017481775	0.057613942	0.009367737	0.011594135
ACOX3_-_8442435.23-P2|ACOX3_+_8442383.23-P2	ACOX3	989	1123	1037	1361	1135	1575	1414	2006	0.003783552	1.33E-05	-0.022051744	0.033064779
ACOXL_+_111490271.23-P1P2|ACOXL_+_111490261.23-P1P2	ACOXL	810	879	971	714	1236	1885	1306	1422	-0.002980423	-0.085533124	-0.00932469	-0.00854504
ACP1_-_264970.23-P1P2|ACP1_-_264967.23-P1P2	ACP1	202	53	216	67	792	367	792	183	-0.212944194	-0.21166789	-0.1697078	-0.251761138
ACP2_+_47270332.23-P1P2|ACP2_+_47270309.23-P1P2	ACP2	306	445	307	348	270	558	312	350	0.040601714	-0.021669419	0.031429633	-0.003895983
ACP5_-_11688064.23-P1|ACP5_-_11688455.23-P1	ACP5	1039	281	1086	237	2373	759	2812	626	-0.210083743	-0.264662775	-0.219767006	-0.258081433
ACP5_-_11688064.23-P1|ACP5_-_11689771.23-P2	ACP5	683	188	601	198	2373	759	2812	626	-0.207267349	-0.203768983	-0.219767006	-0.258081433
ACP6_-_147142356.23-P1P2|ACP6_-_147142348.23-P1P2	ACP6	687	857	796	1259	1726	1337	2096	1325	0.017802959	0.027559619	-0.100602647	-0.094032783
ACPL2_-_140950647.23-P1P2|ACPL2_+_140950963.23-P1P2	ACPL2	712	912	948	1006	1945	3320	2515	2686	0.021751582	-0.03137362	0.005873613	-0.011577987
ACPP_+_132036293.23-P1P2|ACPP_+_132036344.23-P1P2	ACPP	475	499	577	628	882	1533	982	1007	-0.007828776	-0.027643411	0.008276148	-0.017971889
ACPT_+_51293697.23-ENST00000270593.1|ACPT_+_51293762.23-ENST00000270593.1	ACPT	1340	1327	1403	1539	1943	3371	2553	2689	-0.016630082	-0.026475697	0.008067099	-0.013760839
ACR_-_51176666.23-P1P2|ACR_-_51176714.23-P1P2	ACR	623	1098	863	1077	981	1394	1308	1050	0.069356206	-0.007431994	-0.018858707	-0.056459865
ACRBP_+_6756569.23-P1P2|ACRBP_+_6756572.23-P1P2	ACRBP	713	659	662	1120	852	1455	936	1227	-0.026920347	0.03749132	0.005900407	0.020627598
ACRC_-_70798376.23-P1P2|ACRC_-_70798359.23-P1P2	ACRC	658	769	792	996	1358	2435	1725	1807	0.008073238	-0.006303031	0.012496292	-0.014620755
ACRV1_+_125550697.23-P1P2|ACRV1_-_125550695.23-P1P2	ACRV1	561	561	504	593	1971	3277	2112	2483	-0.015175207	-0.016148635	0.002326911	0.003526485
ACSBG1_+_78526846.23-P1P2|ACSBG1_-_78526810.23-P1P2	ACSBG1	393	404	390	512	838	1292	912	949	-0.011062756	0	-0.007876523	-0.015673052
ACSBG2_-_6135704.23-P1P2|ACSBG2_-_6135684.23-P1P2	ACSBG2	370	485	446	656	1745	2592	1902	2316	0.025149548	0.016785689	-0.012868197	0.009045577
ACSF2_-_48503625.23-P1P2|ACSF2_-_48503778.23-P1P2	ACSF2	813	879	938	939	1710	2818	2129	2247	-0.00353186	-0.039985104	0.001129473	-0.013440123
ACSF3_+_89160267.23-P1P2|ACSF3_-_89160263.23-P1P2	ACSF3	520	901	670	742	709	1191	897	1007	0.066796228	-0.025075899	0.003666818	-0.00374332
ACSL1_+_185746700.23-P1P2|ACSL1_+_185747071.23-P1P2	ACSL1	451	567	600	419	1325	734	1573	664	0.01894158	-0.093111258	-0.145749811	-0.157474791
ACSL3_-_223725834.23-P1P2|ACSL3_+_223725692.23-P1P2	ACSL3	908	597	942	848	1529	1322	1988	1122	-0.077715042	-0.055664286	-0.085792238	-0.11185604
ACSL4_-_108976456.23-P1P2|ACSL4_+_108976382.23-P1P2	ACSL4	996	694	1285	792	1599	1205	1931	1235	-0.06906553	-0.111607386	-0.104308444	-0.09219748
ACSL5_-_114136040.23-P1|ACSL5_-_114136013.23-P1	ACSL5	845	960	605	931	1266	1980	1243	1390	0.003859862	0.023485855	-0.005929533	-0.004350993
ACSL5_-_114133956.23-P2|ACSL5_-_114133923.23-P2	ACSL5	778	856	791	1214	1123	2196	1356	1415	-0.00092346	0.023114115	0.024171446	-0.015227262
ACSL6_-_131347437.23-P1|ACSL6_-_131347379.23-P1	ACSL6	391	303	495	330	2354	1163	2679	1129	-0.053144392	-0.099928189	-0.16120508	-0.157791141
ACSL6_-_131347437.23-P1|ACSL6_-_131310682.23-P2	ACSL6	494	236	516	375	2354	1163	2679	1129	-0.125169147	-0.087215352	-0.16120508	-0.157791141
ACSM1_-_20687076.23-P1P2|ACSM1_-_20687521.23-P1P2	ACSM1	1048	1394	1266	1535	947	1597	1068	1380	0.027397303	-0.011683251	0.004210288	0.018366077
ACSM2A_-_20463283.23-P1P2|ACSM2A_-_20462920.23-P1P2	ACSM2A	611	497	604	902	785	1452	773	925	-0.045960498	0.019057441	0.016651881	0.00628616
ACSM2B_+_20587573.23-P1P2|ACSM2B_-_20587615.23-P1P2	ACSM2B	1017	687	1063	1160	1505	1557	1857	1492	-0.073690434	-0.027245942	-0.061615411	-0.056332702
ACSM3_+_20775331.23-P1P2|ACSM3_+_20775412.23-P1P2	ACSM3	476	293	628	806	762	1450	792	991	-0.087449856	-0.003307537	0.020470486	0.013302586
ACSM4_-_7456922.23-ENST00000399422.4|ACSM4_+_7456915.23-ENST00000399422.4	ACSM4	435	551	551	802	562	942	632	744	0.020056691	0.0152604	0.003351822	0.003707785
ACSM5_-_20421144.23-P1P2|ACSM5_-_20420881.23-P1P2	ACSM5	469	336	319	628	1255	1868	1536	1664	-0.064855555	0.059753883	-0.012600771	-0.009338007
ACSS1_+_25038767.23-P1P2|ACSS1_+_25038734.23-P1P2	ACSS1	722	882	990	1072	426	562	523	556	0.014681707	-0.028391097	-0.028912103	-0.012314506
ACSS2_-_33464845.23-P1P2|ACSS2_-_33464420.23-P1P2	ACSS2	484	148	501	184	1172	273	1327	177	-0.191435291	-0.187700032	-0.262262951	-0.338096024
ACSS3_-_81471913.23-P1P2|ACSS3_-_81471886.23-P1P2	ACSS3	840	838	812	1417	1570	2867	1626	1684	-0.015530796	0.042084022	0.014962943	-0.016412235
ACTA1_+_229569796.23-P1|ACTA1_+_229569744.23-P1	ACTA1	157	6	176	12	1385	109	1639	37	-0.480643719	-0.426122546	-0.407814036	-0.61424069
ACTA1_+_229569796.23-P1|ACTA1_-_229568745.23-P2	ACTA1	314	6	325	15	1385	109	1639	37	-0.58369002	-0.48570885	-0.407814036	-0.61424069
ACTA2_+_90750678.23-P2|ACTA2_-_90712506.23-P1	ACTA2	572	396	679	424	2078	1295	2188	1183	-0.069978119	-0.109617021	-0.129914243	-0.118608224
ACTA2_+_90750678.23-P2|ACTA2_+_90751072.23-P2	ACTA2	734	314	529	466	2078	1295	2188	1183	-0.141716865	-0.058848364	-0.129914243	-0.118608224
ACTB_-_5570191.23-P1P2|ACTB_+_5570130.23-P1P2	ACTB	722	663	722	533	1265	1357	1563	1641	-0.027888706	-0.084933004	-0.056733858	-0.014266186
ACTBL2_-_56778433.23-P1P2|ACTBL2_-_56778438.23-P1P2	ACTBL2	599	646	570	638	747	1306	822	1327	-0.003911934	-0.023510762	0.009055197	0.05335401
ACTC1_-_35087711.23-P1P2|ACTC1_-_35087685.23-P1P2	ACTC1	1217	1470	1411	1539	1974	3449	2415	2406	0.013011451	-0.027315569	0.009017323	-0.022510234
ACTG1_-_79479777.23-P1P2|ACTG1_-_79479816.23-P1P2	ACTG1	1196	1743	943	1389	680	1113	1010	1247	0.041033581	0.017052859	0.000164876	0.011210513
ACTG2_+_74120202.23-P1|ACTG2_-_74120192.23-P1	ACTG2	827	687	1074	943	1677	2442	1963	2021	-0.042837961	-0.059351241	-0.015546468	-0.017344217
ACTG2_+_74128454.23-P2|ACTG2_+_74128598.23-P2	ACTG2	318	277	345	482	441	849	557	539	-0.035720915	0.009166079	0.021977394	-0.027081816
ACTL10_+_32254796.23-P1P2|ACTL10_-_32254768.23-P1P2	ACTL10	708	1150	759	1319	660	1221	650	910	0.057188178	0.041462745	0.016660164	0.030944272
ACTL6A_-_179280784.23-P1P2|ACTL6A_-_179280860.23-P1P2	ACTL6A	249	23	197	16	1076	535	1300	286	-0.365156758	-0.403041393	-0.160277729	-0.259709145
ACTL6B_+_100253966.23-P1P2|ACTL6B_+_100253969.23-P1P2	ACTL6B	668	922	751	931	1740	3105	2093	2529	0.032891505	-0.008421406	0.011858249	0.007834395
ACTL7A_-_111624608.23-P1P2|ACTL7A_-_111624563.23-P1P2	ACTL7A	735	561	942	1291	914	1439	908	997	-0.055458399	0.006402272	-0.005049831	-0.007227374
ACTL7B_-_111618185.23-P1P2|ACTL7B_+_111618198.23-P1P2	ACTL7B	994	1694	846	1265	1085	2139	1286	1714	0.064381402	0.019267757	0.02526433	0.023245582
ACTL8_-_18081836.23-P1P2|ACTL8_+_18081845.23-P1P2	ACTL8	899	1040	728	1223	1156	1958	1221	1475	0.006561145	0.036457236	0.004810297	0.007787775
ACTL9_-_8809073.23-P1P2|ACTL9_+_8808881.23-P1P2	ACTL9	582	539	681	957	1310	2155	1522	1920	-0.026617906	0.010088494	0.000881414	0.014602731
ACTN1_-_69445956.23-P1P2|ACTN1_-_69445944.23-P1P2	ACTN1	785	758	750	788	1468	2090	1648	1704	-0.020395644	-0.032846089	-0.018588756	-0.016668942
ACTN2_+_236849841.23-P1P2|ACTN2_+_236849796.23-P1P2	ACTN2	317	336	280	530	1137	1713	1385	1547	-0.006508351	0.053929458	-0.010971197	-0.004531769
ACTN3_-_66314441.23-P1P2|ACTN3_+_66313715.23-P1P2	ACTN3	944	834	839	1215	2149	3796	2509	2884	-0.033657415	0.014538092	0.010492054	-1.64E-05
ACTN4_-_39138358.23-P1P2|ACTN4_-_39138303.23-P1P2	ACTN4	718	835	998	1138	1372	2405	1697	1526	0.007341478	-0.020756051	0.009443613	-0.038622785
ACTR1A_+_104262452.23-P1P2|ACTR1A_+_104262449.23-P1P2	ACTR1A	957	1246	1092	1328	1291	1885	1631	1494	0.024199939	-0.01124411	-0.015190164	-0.035717569
ACTR1B_-_98280407.23-P1P2|ACTR1B_+_98280464.23-P1P2	ACTR1B	1077	1501	1143	1441	1828	2857	2128	2346	0.034361815	-0.005922757	-0.006010048	-0.006585894
ACTR2_-_65454971.23-P1P2|ACTR2_-_65454953.23-P1P2	ACTR2	750	760	753	861	1708	2589	1744	1634	-0.013199684	-0.020355212	-0.010136323	-0.032166951
ACTR3_+_114647775.23-P1P2|ACTR3_-_114647751.23-P1P2	ACTR3	915	724	904	939	1407	2223	1688	1725	-0.050099286	-0.03453353	-0.004555972	-0.018513784
ACTR3B_-_152456898.23-P1P2|ACTR3B_-_152456932.23-P1P2	ACTR3B	578	733	517	917	1271	1963	1703	1706	0.020250954	0.044441787	-0.007622626	-0.021646327
ACTR3C_+_150020638.23-P1P2|ACTR3C_+_150020641.23-P1P2	ACTR3C	551	826	735	932	1726	2624	1913	2594	0.045199437	-0.005083904	-0.009739161	0.025966104
ACTR5_+_37377158.23-P1P2|ACTR5_-_37377178.23-P1P2	ACTR5					1141	951	1416	814			-0.090727807	-0.108942457
ACTR8_+_53916142.23-P1P2|ACTR8_+_53916157.23-P1P2	ACTR8	903	393	1007	739	1753	1494	1919	1209	-0.139204932	-0.085828758	-0.087734731	-0.094562028
ACTRT1_+_127186306.23-P1P2|ACTRT1_+_127186328.23-P1P2	ACTRT1	644	754	745	933	945	1450	1080	1297	0.008342131	-0.00692042	-0.008516161	0.00685816
ACTRT2_-_2938118.23-P1P2|ACTRT2_+_2938135.23-P1P2	ACTRT2	842	767	999	1313	1133	1704	1351	1848	-0.029090975	0.000222854	-0.011206286	0.027329938
ACTRT3_+_169487327.23-P1P2|ACTRT3_+_169487342.23-P1P2	ACTRT3	1013	1103	1282	1565	1459	2961	1931	2236	-0.002475153	-0.010679014	0.029191113	0.001138018
ACVR1_+_158732232.23-P1P2|ACVR1_+_158732079.23-P1P2	ACVR1	697	606	910	948	1235	1601	1486	1209	-0.036037579	-0.034101761	-0.031220837	-0.05435465
ACVR1B_-_52345530.23-P1P2|ACVR1B_+_52345561.23-P1P2	ACVR1B	605	618	552	721	1319	2220	1524	1466	-0.012005267	-0.000724474	0.003963842	-0.028023436
ACVR1C_+_158485339.23-P1P2|ACVR1C_-_158485307.23-P1P2	ACVR1C	928	1224	1084	1366	1930	3285	2427	2534	0.026132376	-0.005990985	0.005488407	-0.015138191
ACVR2A_+_148602343.23-P1P2|ACVR2A_-_148602102.23-P1P2	ACVR2A	692	889	852	1182	1777	2705	1983	1981	0.022190216	0.008201046	-0.009565593	-0.022081745
ACVR2B_+_38495339.23-P1P2|ACVR2B_+_38495606.23-P1P2	ACVR2B	495	626	464	1114	471	982	518	1035	0.019827415	0.089134311	0.032723944	0.086824757
ACVRL1_-_52300776.23-P1P2|ACVRL1_+_52300726.23-P1P2	ACVRL1	1053	1303	1119	1563	1800	2568	2245	2210	0.016612475	0.009216349	-0.018303705	-0.02439405
ACY1_-_52017547.23-P1P2|ACY1_-_52017631.23-P1P2	ACY1	1087	1111	1244	1305	240	398	345	360	-0.011916591	-0.03307183	0.001784789	-0.015246209
ACY3_-_67418149.23-P1|ACY3_+_67418110.23-P1	ACY3	988	1215	982	1026	770	1214	835	810	0.01568409	-0.033669811	-0.004869608	-0.026699625
ACY3_+_67414985.23-P2|ACY3_-_67414970.23-P2	ACY3	894	1088	960	1167	1513	2589	1748	1839	0.014125452	-0.011307201	0.006198929	-0.013943191
ACYP1_-_75530711.23-P1|ACYP1_-_75530695.23-P1	ACYP1	553	678	604	772	787	1317	872	1020	0.015210466	-0.003919769	0.003161166	0.002714806
ACYP1_-_75536179.23-P2|ACYP1_-_75536194.23-P2	ACYP1	452	485	565	657	1223	2042	1512	1642	-0.004673627	-0.017879579	0.002881055	-0.00895464
ACYP2_-_54342821.23-P1P2|ACYP2_+_54342748.23-P1P2	ACYP2	639	623	604	678	563	1255	596	610	-0.018956353	-0.023085429	0.041758041	-0.018276237
ADA_+_43280285.23-P1P2|ADA_+_43280282.23-P1P2	ADA	1199	1648	1149	1469	1731	2761	1902	2082	0.032294461	-0.003853271	-0.00326953	-0.007704172
ADAD1_-_123300726.23-P1P2|ADAD1_-_123300755.23-P1P2	ADAD1	1244	1838	1292	1413	1920	3517	2284	2447	0.043083151	-0.026919096	0.015386879	-0.011082349
ADAD2_-_84224870.23-P1P2|ADAD2_+_84224814.23-P1P2	ADAD2	650	475	694	707	1242	2135	1412	1697	-0.061934624	-0.037403057	0.006806261	0.006983692
ADAL_-_43623140.23-P1P2|ADAL_-_43623106.23-P1P2	ADAL	505	468	489	316	1151	1308	1488	1260	-0.026515731	-0.104517329	-0.048965792	-0.048070885
ADAM10_+_59041886.23-P1P2|ADAM10_-_59041703.23-P1P2	ADAM10	275	27	229	12	684	116	687	116	-0.356911183	-0.46484022	-0.304472319	-0.300647173
ADAM11_+_42836787.23-P1P2|ADAM11_-_42836572.23-P1P2	ADAM11	720	845	746	1045	1186	953	1103	1137	0.008702475	0.009622181	-0.095655806	-0.017150943
ADAM12_-_128077031.23-P1P2|ADAM12_-_128077010.23-P1P2	ADAM12	1028	1206	917	1535	967	1801	917	1272	0.008653229	0.035944871	0.017594551	0.02951274
ADAM15_+_155023841.23-P1P2|ADAM15_+_155023860.23-P1P2	ADAM15	536	237	420	424	981	600	1042	434	-0.13670321	-0.038744632	-0.132394055	-0.159507785
ADAM17_-_9695930.23-P1P2|ADAM17_+_9695837.23-P1P2	ADAM17	665	792	730	945	964	1473	1204	1300	0.01089091	-0.002030885	-0.009076886	-0.009863328
ADAM18_-_39442196.23-P1P2|ADAM18_+_39442286.23-P1P2	ADAM18	619	213	650	379	795	1379	820	894	-0.174042434	-0.119718068	0.007997156	-0.008345592
ADAM19_+_157002746.23-P1P2|ADAM19_+_157002739.23-P1P2	ADAM19	965	1123	926	1340	2096	3963	2585	2802	0.0074487	0.014434198	0.019660911	-0.009245918
ADAM2_-_39695635.23-P1P2|ADAM2_-_39695737.23-P1P2	ADAM2	443	567	496	667	1200	1115	1494	835	0.021608567	0.003566807	-0.076089484	-0.113370248
ADAM20_-_71001696.23-P1P2|ADAM20_+_71001702.23-P1P2	ADAM20	298	280	386	752	1032	1949	1282	1647	-0.024448018	0.058250623	0.019474347	0.017465707
ADAM21_+_70918885.23-P1P2|ADAM21_-_70918928.23-P1P2	ADAM21	612	434	644	945	846	1516	958	1044	-0.066404158	0.016470369	0.012385874	-0.008411594
ADAM22_+_87563621.23-P1P2|ADAM22_-_87563632.23-P1P2	ADAM22	1310	1902	1428	2026	1867	2826	2275	2711	0.040477782	0.011531758	-0.010325321	0.005651263
ADAM23_+_207308275.23-P1P2|ADAM23_-_207308295.23-P1P2	ADAM23	260	219	219	312	1896	2648	2309	2397	-0.040697596	0.011974274	-0.021171046	-0.016040974
ADAM28_+_24151604.23-P1P2|ADAM28_+_24151646.23-P1P2	ADAM28	750	893	807	1137	739	1376	1009	1168	0.010856048	0.01047983	0.017539535	0.001077983
ADAM29_+_175839643.23-P1P2|ADAM29_+_175839773.23-P1P2	ADAM29	373	323	364	483	743	1100	817	957	-0.03660838	0.00156971	-0.013347515	0.002932418
ADAM30_+_120439094.23-P1P2|ADAM30_-_120439090.23-P1P2	ADAM30	1151	1344	1388	1791	1789	2846	2055	2475	0.007957863	-0.002486289	-0.003623874	0.007321321
ADAM32_+_38965299.23-P1P2|ADAM32_+_38965287.23-P1P2	ADAM32	1140	1462	1183	1486	1585	2499	1941	2123	0.021950153	-0.006460518	-0.004833928	-0.007829223
ADAM33_-_3662638.23-P1P2|ADAM33_+_3662647.23-P1P2	ADAM33	452	502	465	631	542	1023	647	781	0.000461165	0.00489799	0.019339557	0.007648883
ADAM7_-_24298561.23-P1P2|ADAM7_-_24298558.23-P1P2	ADAM7	702	1137	741	861	1615	2352	1836	2067	0.056761021	-0.017983764	-0.015531237	-0.003287893
ADAM8_-_135090331.23-P1P2|ADAM8_-_135090322.23-P1P2	ADAM8	929	957	753	931	221	341	214	237	-0.010745089	-0.008814015	-0.007927263	-0.005933438
ADAM9_-_38854499.23-P1P2|ADAM9_-_38854561.23-P1P2	ADAM9	982	1181	877	1164	1266	1978	1454	1548	0.012357579	0.001664641	-0.006065726	-0.012073778
ADAMDEC1_+_24242054.23-P1P2|ADAMDEC1_+_24242051.23-P1P2	ADAMDEC1	641	695	836	950	942	1276	1037	924	-0.003113715	-0.021267674	-0.025311169	-0.040056239
ADAMTS1_+_28217664.23-P1|ADAMTS1_+_28217658.23-P1	ADAMTS1	548	767	521	749	1364	2269	1758	1565	0.034959386	0.013427313	0.002386261	-0.040207831
ADAMTS1_+_28216554.23-P2|ADAMTS1_+_28216594.23-P2	ADAMTS1	937	1073	929	1020	1835	2924	2118	2565	0.005045721	-0.026343235	-0.003400728	0.008190081
ADAMTS10_+_8675562.23-P1P2|ADAMTS10_+_8675559.23-P1P2	ADAMTS10	1124	1387	920	1223	1978	2818	2376	2503	0.0161998	0.001899619	-0.018490326	-0.01373412
ADAMTS12_-_33892078.23-P1P2|ADAMTS12_+_33892096.23-P1P2	ADAMTS12	617	846	638	822	1305	1882	1550	1389	0.031900894	-0.002737061	-0.016857968	-0.039165577
ADAMTS13_+_136287556.23-P1P2|ADAMTS13_-_136287562.23-P1P2	ADAMTS13	847	958	960	1285	1606	2652	1921	2282	0.003196072	0.002919271	0.001401532	0.005156814
ADAMTS14_-_72432303.23-P1P2|ADAMTS14_-_72432297.23-P1P2	ADAMTS14	548	699	699	801	1499	2107	1986	1704	0.021113486	-0.020035134	-0.020312709	-0.046003781
ADAMTS15_+_130318737.23-P1P2|ADAMTS15_+_130318578.23-P1P2	ADAMTS15	924	1086	1114	1282	1442	2336	1833	2142	0.008926933	-0.019396799	-0.001184292	0.00257401
ADAMTS16_+_5146341.23-P1|ADAMTS16_+_5146377.23-P1	ADAMTS16	815	890	933	1105	811	1530	825	1162	-0.002043087	-0.015157099	0.01931442	0.03190871
ADAMTS16_+_5140497.23-P2|ADAMTS16_+_5140486.23-P2	ADAMTS16	806	1055	842	1124	1312	2067	1889	2055	0.024987242	0.002513345	-0.004942905	-0.008678354
ADAMTS17_+_100882122.23-P1P2|ADAMTS17_-_100882166.23-P1P2	ADAMTS17	1070	1101	1236	1456	1754	2786	2183	1922	-0.010913743	-0.015946193	-0.003833307	-0.041946416
ADAMTS18_+_77468890.23-P1P2|ADAMTS18_-_77468873.23-P1P2	ADAMTS18	927	1128	1075	1329	1286	1824	1681	1667	0.014105205	-0.008815784	-0.019100369	-0.023238054
ADAMTS19_+_128796021.23-P1P2|ADAMTS19_+_128796013.23-P1P2	ADAMTS19	1181	1477	1148	1855	1239	2140	1662	1942	0.018201215	0.030740542	0.007447319	0.002558691
ADAMTS2_-_178772408.23-P1P2|ADAMTS2_-_178772444.23-P1P2	ADAMTS2	1070	1047	1099	1387	1484	2620	1880	2153	-0.018417418	-0.005767026	0.010410847	-0.000601542
ADAMTS20_+_43945953.23-P1P2|ADAMTS20_+_43945912.23-P1P2	ADAMTS20	575	635	701	1010	1172	1907	1181	1219	-0.000376247	0.013775599	-0.000598149	-0.016944757
ADAMTS3_-_73434891.23-P1P2|ADAMTS3_-_73434871.23-P1P2	ADAMTS3	443	371	586	865	1279	1868	1310	1596	-0.041599333	0.017337736	-0.01515286	0.009123456
ADAMTS4_+_161168828.23-P1P2|ADAMTS4_-_161168836.23-P1P2	ADAMTS4	634	672	485	722	1299	2494	1527	1888	-0.006495092	0.018570606	0.021707461	0.011444233
ADAMTS5_-_28339372.23-P1P2|ADAMTS5_-_28339421.23-P1P2	ADAMTS5	1023	1317	962	1220	2315	3964	2748	3075	0.022519892	-0.005054787	0.006301613	-0.004240561
ADAMTS6_+_64777661.23-P1P2|ADAMTS6_-_64777602.23-P1P2	ADAMTS6	587	500	770	982	991	1744	1146	1430	-0.039088825	-0.004234597	0.009958566	0.012881542
ADAMTS7_-_79103729.23-P1P2|ADAMTS7_+_79103613.23-P1P2	ADAMTS7	795	947	394	1098	921	1189	909	1119	0.01092403	0.111114407	-0.031788359	0.010744356
ADAMTS8_-_130298510.23-P1P2|ADAMTS8_+_130298490.23-P1P2	ADAMTS8	235	233	305	386	1960	3241	2209	2777	-0.016446255	-0.00542913	0.001592168	0.01406387
ADAMTS9_+_64673035.23-P1P2|ADAMTS9_-_64673631.23-P1P2	ADAMTS9	399	45	404	105	875	230	1049	146	-0.338187032	-0.238283592	-0.245915549	-0.331247089
ADAMTSL1_+_18474201.23-P1P2|ADAMTSL1_-_18474157.23-P1P2	ADAMTSL1	568	699	553	718	961	1783	1029	1396	0.015769542	-0.001607011	0.017079295	0.026025425
ADAMTSL2_-_136399861.23-P1P2|ADAMTSL2_+_136399841.23-P1P2	ADAMTSL2	147	69	58	119	442	330	515	533	-0.126994083	0.064800956	-0.105489144	-0.016528447
ADAMTSL3_-_84323067.23-P1P2|ADAMTSL3_-_84322944.23-P1P2	ADAMTSL3	986	975	968	890	1048	1102	1187	1008	-0.01684901	-0.05254728	-0.059424322	-0.047616488
ADAMTSL4_-_150521934.23-P1P2|ADAMTSL4_+_150521916.23-P1P2	ADAMTSL4	131	203	163	151	1020	1955	1265	1455	0.049838377	-0.051374458	0.021464032	7.62E-05
ADAMTSL5_-_1512947.23-P1P2|ADAMTSL5_-_1512963.23-P1P2	ADAMTSL5	629	654	448	637	1412	2401	1787	1812	-0.009363294	0.011787988	0.00534732	-0.019738533
ADAP1_+_994282.23-P1P2|ADAP1_+_994276.23-P1P2	ADAP1	1036	1561	1263	1438	2198	3311	2560	2790	0.046002698	-0.020975419	-0.01097227	-0.008392548
ADAP2_-_29249001.23-P1P2|ADAP2_+_29249009.23-P1P2	ADAP2	256	366	373	273	1536	2262	1789	1948	0.038035114	-0.086132438	-0.014031676	-0.008534355
ADAR_-_154580605.23-P1|ADAR_-_154580629.23-P1	ADAR	708	1148	744	982	1556	2451	1870	2324	0.056928444	0.000836145	-0.004959656	0.012255902
ADARB1_-_46494561.23-P1P2|ADARB1_+_46494897.23-P1P2	ADARB1	954	1184	1217	1595	1743	2394	2194	2559	0.017051959	-0.000188904	-0.023423621	0.002277899
ADARB2_+_1779687.23-ENST00000381312.1|ADARB2_-_1779460.23-ENST00000381312.1	ADARB2	655	578	644	813	383	832	377	442	-0.03382246	-0.005743912	0.038219797	0.003040995
ADAT1_+_75657125.23-P1P2|ADAT1_+_75656919.23-P1P2	ADAT1	462	546	515	796	927	1514	1118	1031	0.009724238	0.024120742	-0.000106287	-0.034656663
ADAT2_-_143771826.23-P1P2|ADAT2_+_143771782.23-P1P2	ADAT2	884	45	836	52	1380	157	1461	327	-0.456787183	-0.448048522	-0.358502356	-0.257056721
ADAT3_-_1905438.23-P1|ADAT3_-_1905405.23-P1	ADAT3	459	239	476	330	1273	1387	1518	1264	-0.112338711	-0.094154536	-0.054637016	-0.050710908
ADAT3_-_1905438.23-P1|ADAT3_+_1908001.23-P2	ADAT3	514	245	556	366	1273	1387	1518	1264	-0.125518283	-0.101812242	-0.054637016	-0.050710908
ADC_-_33546826.23-P1P2|ADC_-_33546829.23-P1P2	ADC	803	1031	994	1171	1467	2542	1824	1827	0.022110048	-0.015941197	0.007889826	-0.02166466
ADCK1_-_78266523.23-P1P2|ADCK1_-_78266512.23-P1P2	ADCK1	705	619	817	1118	988	1483	1150	1347	-0.034574789	0.006172856	-0.011477541	0.002933274
ADCK2_+_140372748.23-P1P2|ADCK2_+_140372768.23-P1P2	ADCK2	1163	1349	1159	1333	1171	2807	1527	2506	0.006964374	-0.019483233	0.051617945	0.055974146
ADCK3_-_227128046.23-P1P2|ADCK3_-_227128055.23-P1P2	ADCK3	803	853	773	1314	1501	2390	1742	1816	-0.006164796	0.038203597	-0.003507387	-0.015381536
ADCK4_+_41222752.23-P1P2|ADCK4_-_41222769.23-P1P2	ADCK4	249	306	355	350	1097	1743	1294	1273	0.015498764	-0.042233241	-0.003807138	-0.024495241
ADCK5_+_145597793.23-P1P2|ADCK5_-_145597781.23-P1P2	ADCK5	449	147	465	240	968	364	1100	209	-0.181254692	-0.137611376	-0.197837249	-0.282594087
ADCY1_+_45614267.23-P1P2|ADCY1_-_45614293.23-P1P2	ADCY1	102	113	88	107	739	1433	857	801	-2.10E-05	-0.011540589	0.023008364	-0.032541979
ADCY10_+_167883329.23-P1P2|ADCY10_-_167882911.23-P1P2	ADCY10	607	773	760	836	676	1169	768	993	0.020876785	-0.026071624	0.00757219	0.018454495
ADCY2_-_7396414.23-P1P2|ADCY2_-_7396463.23-P1P2	ADCY2	545	111	528	175	1350	362	1899	251	-0.251759287	-0.202815831	-0.243387344	-0.339753361
ADCY3_-_25143044.23-P1P2|ADCY3_-_25142849.23-P1P2	ADCY3	1472	2235	1651	2240	1958	3422	2489	2506	0.047160482	0.004932248	0.009054723	-0.020852594
ADCY4_-_24804227.23-P1P2|ADCY4_-_24804233.23-P1P2	ADCY4	1144	1562	1135	1747	1177	1760	1448	1536	0.031302038	0.023560669	-0.011981588	-0.012647216
ADCY5_+_123168382.23-P1P2|ADCY5_-_123168354.23-P1P2	ADCY5	585	395	651	564	1593	1055	1993	822	-0.073705252	-0.061312635	-0.121710295	-0.161148922
ADCY6_+_49182840.23-P1P2|ADCY6_+_49182614.23-P1P2	ADCY6	892	1106	887	1266	1645	2660	1702	1953	0.016907934	0.012397	-0.001425625	-0.000292531
ADCY7_-_50300524.23-P1P2|ADCY7_-_50300498.23-P1P2	ADCY7	715	857	844	1236	1007	1869	1378	1604	0.011845296	0.016191807	0.017129371	0.001953795
ADCY8_-_132053083.23-P1P2|ADCY8_-_132053093.23-P1P2	ADCY8	362	179	395	248	1662	2526	2024	2067	-0.119934279	-0.108723863	-0.009777651	-0.018617258
ADCY9_-_4166392.23-P1P2|ADCY9_+_4166432.23-P1P2	ADCY9	615	892	645	820	1890	3074	2171	2179	0.040283367	-0.004707189	-0.000637506	-0.021344657
ADCYAP1_-_904591.23-P1P2|ADCYAP1_-_904647.23-P1P2	ADCYAP1	524	595	671	864	1226	1566	1841	1436	0.003768365	-0.002822881	-0.033213872	-0.060986645
ADCYAP1R1_-_31091992.23-P1P2|ADCYAP1R1_-_31092299.23-P1P2	ADCYAP1R1	1044	1625	1335	1633	882	1337	1130	927	0.050852155	-0.010379328	-0.010155662	-0.053046538
ADD1_-_2845605.23-P1P2|ADD1_-_2845599.23-P1P2	ADD1	1113	1385	925	1240	1566	3066	1990	2036	0.017451918	0.003138197	0.024351835	-0.018329529
ADD2_+_70995263.23-P1P2|ADD2_+_70995300.23-P1P2	ADD2	720	702	689	766	1434	2288	1778	2059	-0.018951042	-0.024504099	-0.003232863	0.001149759
ADD3_-_111767767.23-P1P2|ADD3_-_111767783.23-P1P2	ADD3	962	1336	1118	1598	1457	2669	1769	2272	0.033830152	0.012619845	0.015382305	0.017427894
ADGB_+_146920153.23-P1P2|ADGB_-_146920345.23-P1P2	ADGB	737	740	874	968	566	1035	691	913	-0.014569335	-0.025059075	0.015078972	0.021852518
ADH1A_+_100212094.23-P1P2|ADH1A_-_100212162.23-P1P2	ADH1A	930	1131	1022	1058	1127	1887	1255	1702	0.014019502	-0.0350301	0.003255452	0.025976819
ADH1B_+_100242511.23-P1P2|ADH1B_-_100242333.23-P1P2	ADH1B	324	226	335	466	807	1434	797	1058	-0.068772248	0.008521629	0.011249082	0.022596227
ADH1C_-_100273879.23-P1P2|ADH1C_-_100273923.23-P1P2	ADH1C	796	931	851	1243	1761	2766	1830	2563	0.008194382	0.015806448	-0.005341088	0.031050156
ADH4_+_100065429.23-P1P2|ADH4_+_100065433.23-P1P2	ADH4	775	707	700	791	1540	2385	1786	1949	-0.028871614	-0.022100843	-0.007245904	-0.008189754
ADH5_+_100009821.23-P1P2|ADH5_+_100009684.23-P1P2	ADH5	651	564	695	1053	1002	1469	1283	1146	-0.036564554	0.021201377	-0.014650823	-0.039674411
ADH6_-_100140386.23-P1P2|ADH6_+_100140286.23-P1P2	ADH6	350	441	524	818	466	828	547	703	0.019252882	0.025589735	0.011186093	0.017488004
ADH7_+_100356481.23-P1P2|ADH7_+_100356385.23-P1P2	ADH7	766	668	838	1124	707	1229	739	953	-0.035591394	0.0032164	0.008278382	0.01804029
ADHFE1_-_67344732.23-P1P2|ADHFE1_-_67344792.23-P1P2	ADHFE1	315	294	491	346	983	1190	1124	1081	-0.025445352	-0.091753368	-0.040450015	-0.028054421
ADI1_+_3523275.23-P1P2|ADI1_-_3523293.23-P1P2	ADI1	181	161	156	177	914	1474	1170	1162	-0.03256078	-0.021585813	-0.001811874	-0.023001583
ADIG_+_37209911.23-P1P2|ADIG_+_37209902.23-P1P2	ADIG	398	393	408	595	1159	2006	1398	1796	-0.017058552	0.015514474	0.007724996	0.017465639
ADIPOQ_+_186560526.23-P1P2|ADIPOQ_+_186560448.23-P1P2	ADIPOQ	362	404	296	585	185	453	251	247	0.001175969	0.060312245	0.054124422	-0.024440365
ADIPOR1_+_202927394.23-P1P2|ADIPOR1_-_202927375.23-P1P2	ADIPOR1	1167	1329	1262	1962	1772	3196	2124	2961	0.004222927	0.025042553	0.013296061	0.030324347
ADIPOR2_-_1800242.23-P1P2|ADIPOR2_-_1800278.23-P1P2	ADIPOR2	922	594	1089	1104	1489	1677	1731	1436	-0.080748807	-0.038122129	-0.050170839	-0.051299172
ADIRF_-_88728314.23-P1P2|ADIRF_-_88728245.23-P1P2	ADIRF	404	482	553	599	1011	1501	1063	1233	0.011129274	-0.028351813	-0.012951667	0.001396915
ADK_-_75936578.23-P1|ADK_+_75936517.23-P1	ADK	574	822	693	751	1581	2359	1745	1762	0.038378673	-0.028277994	-0.012263654	-0.02039865
ADK_-_75911025.23-P2|ADK_-_75911021.23-P2	ADK	456	564	579	840	709	861	800	946	0.016507682	0.014781012	-0.040036403	0.004419591
ADM_+_10327266.23-P1P2|ADM_+_10326660.23-P1P2	ADM	861	1157	955	963	1010	1769	1220	1653	0.028911282	-0.038910624	0.009318505	0.025830043
ADM2_-_50920028.23-P1P2|ADM2_+_50920011.23-P1P2	ADM2	351	496	306	448	1529	2738	1807	2168	0.036343471	0.016053952	0.012323295	0.006717649
ADM5_+_50191862.23-P1P2|ADM5_+_50191867.23-P1P2	ADM5	706	889	895	1290	435	682	465	462	0.01920317	0.013845097	-0.005672983	-0.022939182
ADNP_+_49547361.23-P1P2|ADNP_-_49547707.23-P1P2	ADNP	641	278	652	318	1366	662	1728	608	-0.139637751	-0.146036556	-0.163756152	-0.186091415
ADNP2_-_77867648.23-P1P2|ADNP2_+_77867421.23-P1P2	ADNP2	439	56	489	57	503	50	533	130	-0.320399813	-0.355578603	-0.375057284	-0.242999724
ADO_-_64564781.23-P1P2|ADO_-_64564623.23-P1P2	ADO	633	340	816	622	973	534	1373	296	-0.107795404	-0.080214563	-0.146975817	-0.262909673
ADORA1_+_203097472.23-P1P2|ADORA1_+_203097450.23-P1P2	ADORA1	935	1262	936	1291	1848	2743	2176	2296	0.029573676	0.007345789	-0.012964776	-0.013481471
ADORA2A_-_24819888.23-P1P2|ADORA2A_-_24819903.23-P1P2	ADORA2A	1292	1452	1638	1575	2258	3778	2409	3090	0.00224844	-0.045936326	0.003183354	0.017230749
ADORA2B_-_15848791.23-P1P2|ADORA2B_+_15848650.23-P1P2	ADORA2B	817	845	879	1337	547	897	535	544	-0.010148621	0.02179431	0.000400112	-0.019303305
ADORA3_+_112031411.23-P1|ADORA3_+_112031386.23-P1	ADORA3	976	1316	909	1326	1187	2017	1488	1416	0.029423642	0.015618822	0.005246073	-0.029720669
ADORA3_-_112046251.23-P2|ADORA3_+_112046115.23-P2	ADORA3	392	484	451	594	437	720	592	808	0.016238399	0.000489414	0.001010283	0.026943627
ADPGK_+_73076082.23-P1P2|ADPGK_+_73076066.23-P1P2	ADPGK	526	272	516	346	1685	617	2256	426	-0.113405229	-0.099079799	-0.201512537	-0.283874916
ADPRH_+_119298491.23-P1P2|ADPRH_+_119298604.23-P1P2	ADPRH	1569	2072	1405	1625	843	1423	903	1074	0.02633158	-0.018653643	0.004334195	0.005333418
ADPRHL1_+_114107736.23-P1|ADPRHL1_+_114107533.23-P1	ADPRHL1	737	666	915	969	379	650	324	427	-0.030282252	-0.031675519	0.006392502	0.021388936
ADPRHL1_-_114103424.23-P2|ADPRHL1_-_114103435.23-P2	ADPRHL1	419	306	444	544	584	1143	695	620	-0.061981695	-0.010178209	0.024235529	-0.03986135
ADPRHL2_+_36554555.23-P1P2|ADPRHL2_-_36554523.23-P1P2	ADPRHL2	839	957	821	1009	974	1434	1155	1328	0.004455883	-0.009697257	-0.014082406	1.80E-05
ADPRM_-_10600988.23-P1P2|ADPRM_+_10600958.23-P1P2	ADPRM	130	35	62	23	1097	245	1444	201	-0.208083902	-0.182797914	-0.267888429	-0.331480571
ADRA1A_-_26724797.23-P1P2|ADRA1A_+_26724406.23-P1P2	ADRA1A	799	1033	907	1200	487	703	512	766	0.023144077	0.001196899	-0.016781689	0.041355858
ADRA1B_+_159343520.23-P1P2|ADRA1B_-_159343504.23-P1P2	ADRA1B	982	1057	914	1208	1761	3070	1961	1787	-0.004194223	0.001043071	0.008713666	-0.036533571
ADRA1D_-_4229926.23-P1P2|ADRA1D_-_4229650.23-P1P2	ADRA1D	1094	1449	1086	1317	2215	3214	2249	2615	0.026762892	-0.011658995	-0.016018458	0.001788768
ADRA2A_+_112836769.23-P1P2|ADRA2A_+_112836955.23-P1P2	ADRA2A	307	452	437	648	1254	2325	1713	2046	0.042441843	0.01798129	0.017000502	0.006009755
ADRA2B_-_96782246.23-P1P2|ADRA2B_-_96782243.23-P1P2	ADRA2B	488	544	501	632	311	564	430	522	0.001017522	-0.005868041	0.013873503	0.008515653
ADRA2C_-_3767700.23-P1P2|ADRA2C_-_3767703.23-P1P2	ADRA2C	1378	1956	1514	2121	1991	3405	2684	2810	0.037104431	0.009663591	0.006131068	-0.014708089
ADRB1_+_115803641.23-P1P2|ADRB1_-_115803895.23-P1P2	ADRB1	326	1132	611	619	1904	3420	2211	2379	0.170413336	-0.038222711	0.012744743	-0.010406145
ADRB2_-_148206186.23-P1P2|ADRB2_+_148206227.23-P1P2	ADRB2	1436	1532	1433	1623	1276	2165	1725	1809	-0.005517067	-0.02175037	0.005048258	-0.014446816
ADRB3_+_37824097.23-P1P2|ADRB3_-_37823993.23-P1P2	ADRB3	764	1008	713	1010	713	1210	734	856	0.026169982	0.011270164	0.005041545	0.002237341
ADRBK1_-_67033953.23-P1P2|ADRBK1_+_67033933.23-P1P2	ADRBK1			37	124	2662	4140	2981	3031		0.135867475	-0.006666503	-0.019306984
ADRBK2_+_25960616.23-P1P2|ADRBK2_-_25960625.23-P1P2	ADRBK2	844	486	818	539	1376	2182	1328	1472	-0.097476404	-0.101710478	-0.004063064	-0.005738082
ADRM1_+_60878013.23-P1P2|ADRM1_-_60878073.23-P1P2	ADRM1	837	658	805	659	1645	2767	1849	2042	-0.051062554	-0.06968279	0.003889836	-0.006310862
ADSL_-_40742737.23-P1P2|ADSL_-_40742584.23-P1P2	ADSL	412	8	399	101	1013	307	1230	217	-0.586611332	-0.242133306	-0.226851753	-0.294271021
ADSS_-_244615160.23-P1P2|ADSS_-_244615191.23-P1P2	ADSS	403	143	485	25	715	198	869	199	-0.16924213	-0.472967521	-0.238827057	-0.253222458
ADSSL1_-_105190615.23-P1P2|ADSSL1_-_105190666.23-P1P2	ADSSL1	883	1057	804	1119	1062	1709	1395	1727	0.011659302	0.008672933	-0.002093797	0.011643374
ADTRP_-_11779009.23-P1P2|ADTRP_-_11778993.23-P1P2	ADTRP	711	682	616	744	1364	2501	1623	1981	-0.021385524	-0.012276668	0.015506774	0.009418843
AEBP1_+_44143999.23-P1P2|AEBP1_+_44144026.23-P1P2	AEBP1	813	870	730	1013	1230	1887	1359	1358	-0.00506714	0.008229931	-0.008526201	-0.022038793
AEBP2_+_19592704.23-P1P2|AEBP2_+_19592658.23-P1P2	AEBP2	917	881	947	940	1938	2202	2505	1738	-0.021149896	-0.041237967	-0.048981464	-0.07940709
AEN_-_89164606.23-P1P2|AEN_-_89164638.23-P1P2	AEN	1295	1359	1327	1763	2138	3096	2494	2614	-0.007976352	0.001824303	-0.016291912	-0.014532542
AES_-_3062479.23-P1P2|AES_-_3062476.23-P1P2	AES	440	432	454	578	899	1195	1187	1270	-0.01790933	-0.004517768	-0.027854007	-0.011298293
AFAP1_+_7941515.23-P1P2|AFAP1_-_7941481.23-P1P2	AFAP1	335	410	465	513	765	1114	765	1083	0.014915597	-0.025650801	-0.015572985	0.032705989
AFAP1L1_+_148651466.23-P1P2|AFAP1L1_-_148651676.23-P1P2	AFAP1L1	1191	1272	1019	1269	2179	3946	2214	2549	-0.005356554	-0.007738819	0.013847666	0.000235116
AFAP1L2_+_116164197.23-P1P2|AFAP1L2_-_116164240.23-P1P2	AFAP1L2	517	625	806	963	1022	1167	1092	1347	0.01310746	-0.013865343	-0.048320021	0.011067891
AFF1_+_87856192.23-P1P2|AFF1_-_87856182.23-P1P2	AFF1	751	1178	847	861	2187	2830	2469	2551	0.051984126	-0.037721989	-0.031454145	-0.016784869
AFF2_+_147582328.23-P1P2|AFF2_+_147582325.23-P1P2	AFF2	1202	1186	1052	1299	1802	2916	2031	2109	-0.017174866	-0.008994266	-0.00132452	-0.01599694
AFF3_+_100758974.23-P1P2|AFF3_-_100758793.23-P1P2	AFF3	816	754	877	1161	1073	2015	1097	1632	-0.026961898	0.001283505	0.018714326	0.040524776
AFF4_-_132299252.23-P1P2|AFF4_+_132299267.23-P1P2	AFF4	986	1087	848	1183	1240	1977	1466	1742	-0.000624838	0.009020738	-0.003338229	0.005198382
AFM_+_74347558.23-P1P2|AFM_+_74347685.23-P1P2	AFM	436	322	468	676	1028	1735	1159	1308	-0.060320043	0.014116567	0.004323889	-0.002911041
AFMID_+_76183477.23-P1P2|AFMID_+_76183490.23-P1P2	AFMID	492	372	403	443	241	769	305	286	-0.056832765	-0.026187073	0.089868508	-0.032008228
AFP_-_74301991.23-P1|AFP_-_74301988.23-P1	AFP	465	465	434	644	478	713	589	661	-0.015175207	0.018083355	-0.012370088	-0.003807882
AFP_+_74316357.23-P2|AFP_+_74316369.23-P2	AFP	705	741	838	1136	1403	2349	1539	1887	-0.007747567	0.004784766	0.003257894	0.010130194
AFTPH_-_64751594.23-P1P2|AFTPH_-_64751572.23-P1P2	AFTPH	1139	1179	1139	1345	1389	2135	1558	1613	-0.010024789	-0.015588692	-0.008264635	-0.016468363
AGA_+_178363535.23-P1P2|AGA_-_178363567.23-P1P2	AGA	110	92	88	144	776	1339	813	995	-0.041599333	0.032006705	0.007288611	0.0098236
AGAP1_+_236403013.23-P1P2|AGAP1_-_236402788.23-P1P2	AGAP1	996	793	1187	1185	292	443	358	311	-0.049176708	-0.0403915	-0.010149472	-0.043999166
AGAP10_+_47239240.23-ENST00000413193.2|AGAP10_+_47239673.23-ENST00000413193.2	AGAP10	673	558	741	1063	2374	3722	2457	3053	-0.043115197	0.013136971	-0.005581332	0.012233436
AGAP11_-_88730150.23-P1P2|AGAP11_+_88730713.23-P1P2	AGAP11	762	768	726	988	1113	1818	1309	1419	-0.014005379	0.005350916	-8.06E-05	-0.009237777
AGAP2_+_58135895.23-P1P2|AGAP2_+_58135858.23-P1P2	AGAP2	563	562	748	937	974	1845	1035	1203	-0.015440242	-0.006881969	0.019875708	0.001720485
AGAP3_-_150783602.23-P1P2|AGAP3_+_150783556.23-P1P2	AGAP3	749	928	672	1054	855	1614	1130	1191	0.016790425	0.026308849	0.019401225	-0.013658586
AGAP9_-_48190108.23-ENST00000453919.1|AGAP9_-_48189675.23-ENST00000453919.1	AGAP9	673	558	741	1063	2374	3722	2457	3053	-0.043115197	0.013136971	-0.005581332	0.012233436
AGBL1_+_86686989.23-ENST00000421325.2|AGBL1_+_86687018.23-ENST00000421325.2	AGBL1	262	357	275	420	1005	1437	1198	1431	0.030880361	0.022270671	-0.018021027	0.006015845
AGBL1_+_86685262.23-ENST00000441037.2|AGBL1_+_86685489.23-ENST00000441037.2	AGBL1	1007	909	966	1329	897	1422	1010	1253	-0.030450278	0.006972155	-0.004122434	0.011965083
AGBL2_+_47736890.23-P1P2|AGBL2_+_47736896.23-P1P2	AGBL2	429	494	447	592	1358	2035	1570	1737	0.005848796	0.001305651	-0.011688435	-0.006029404
AGBL3_-_134671328.23-P1P2|AGBL3_-_134671452.23-P1P2	AGBL3	1119	1577	1274	1382	910	1473	966	1196	0.036025463	-0.028123597	-0.001312597	0.011646763
AGBL4_-_50489570.23-P1P2|AGBL4_-_50489541.23-P1P2	AGBL4	760	940	970	1390	841	1552	948	1362	0.016532689	0.012990676	0.01634648	0.035035009
AGBL5_+_27274578.23-P1|AGBL5_+_27274552.23-P1	AGBL5	236	13	304	41	1773	235	2022	203	-0.437679174	-0.333210884	-0.338168748	-0.382866936
AGBL5_+_27274578.23-P1|AGBL5_+_27276183.23-P2	AGBL5	226	38	193	7	1773	235	2022	203	-0.278233827	-0.511444986	-0.338168748	-0.382866936
AGER_+_32151968.23-P1P2|AGER_+_32151976.23-P1P2	AGER	786	856	921	1044	1031	1801	1280	1550	-0.002449372	-0.021631755	0.0089624	0.008167249
AGFG1_-_228336893.23-P1P2|AGFG1_-_228336896.23-P1P2	AGFG1	654	346	773	742	1071	1536	1202	1028	-0.110057116	-0.046184587	-0.017611785	-0.04650253
AGFG2_-_100136951.23-P1P2|AGFG2_-_100136848.23-P1P2	AGFG2	614	674	655	876	1347	2095	1460	1750	-0.001272402	0.002775698	-0.006676648	0.006563617
AGGF1_+_76326273.23-P1P2|AGGF1_+_76326308.23-P1P2	AGGF1	628	633	943	1011	566	1088	655	695	-0.01399272	-0.029860624	0.021806071	-0.012611019
AGK_-_141251280.23-P1P2|AGK_-_141251259.23-P1P2	AGK	717	990	890	1038	1215	2375	3	1817	0.032951213	-0.017427449	0.024124603	0.940796286
AGL_-_100315679.23-P1P2|AGL_-_100315704.23-P1P2	AGL	834	932	910	1360	947	1264	1064	1122	0.001398384	0.019196095	-0.02729719	-0.013580157
AGMAT_-_15911533.23-P1P2|AGMAT_+_15911485.23-P1P2	AGMAT	1280	1718	1632	2222	1129	1689	1313	1494	0.028748092	0.005450096	-0.011921298	-0.001619883
AGMO_+_15601600.23-P1P2|AGMO_-_15601543.23-P1P2	AGMO	405	295	424	546	947	1658	1310	1164	-0.062368018	-0.002839367	0.009261361	-0.040498612
AGO1_-_36349067.23-P1P2|AGO1_-_36348838.23-P1P2	AGO1	603	497	550	427	1132	582	1219	388	-0.043995373	-0.07748276	-0.155779293	-0.201752849
AGO2_-_141645534.23-P1P2|AGO2_+_141645724.23-P1P2	AGO2	392	446	341	630	1218	2214	1512	1330	0.004053108	0.050394822	0.014331796	-0.0420868
AGO3_+_36396775.23-P1P2|AGO3_-_36396745.23-P1P2	AGO3	709	1058	544	1062	1315	1846	1463	1505	0.044536145	0.058608939	-0.020489157	-0.017473099
AGO4_+_36273634.23-P1P2|AGO4_+_36273598.23-P1P2	AGO4	938	1025	1160	973	1285	1244	1347	1087	-0.001941908	-0.066102921	-0.070561052	-0.055635385
AGPAT1_+_32143853.23-P1|AGPAT1_+_32143856.23-P1	AGPAT1	418	248	423	465	1204	830	1460	476	-0.09289824	-0.026180792	-0.116296367	-0.198029394
AGPAT2_+_139581621.23-P1P2|AGPAT2_-_139581678.23-P1P2	AGPAT2	561	627	719	788	1264	2125	1273	1419	0.001408067	-0.026614941	0.003808024	-0.00485375
AGPAT3_+_45285114.23-P1P2|AGPAT3_+_45285099.23-P1P2	AGPAT3	572	459	528	894	1234	1996	1676	1644	-0.047980722	0.037585015	-0.001395801	-0.024954159
AGPAT4_+_161694832.23-P1P2|AGPAT4_-_161695108.23-P1P2	AGPAT4	444	142	522	322	1314	1153	1426	663	-0.184718705	-0.111379816	-0.083801676	-0.14228623
AGPAT5_+_6566209.23-P1P2|AGPAT5_+_6566173.23-P1P2	AGPAT5	984	1042	925	899	1251	1636	1291	1314	-0.006630328	-0.044352194	-0.03004099	-0.01914698
AGPAT6_+_41435781.23-P1P2|AGPAT6_+_41435763.23-P1P2	AGPAT6	912	1609	922	1984	1139	2365	1375	1993	0.069542591	0.07304777	0.032257747	0.03643952
AGPAT9_+_84457483.23-P1P2|AGPAT9_+_84457464.23-P1P2	AGPAT9	1103	1279	1126	1411	1630	2549	2033	2289	0.006916267	-0.006817382	-0.005936252	-0.003272259
AGPS_-_178257526.23-P1P2|AGPS_-_178257523.23-P1P2	AGPS	618	222	784	445	902	520	1181	414	-0.167648882	-0.123713029	-0.140345885	-0.186595565
AGR2_+_16844571.23-P1P2|AGR2_+_16844579.23-P1P2	AGR2	810	896	901	1088	593	961	752	620	-0.000122819	-0.012293607	-0.001185457	-0.052245489
AGR3_+_16921530.23-P1P2|AGR3_-_16921591.23-P1P2	AGR3	268	268	390	410	514	1044	551	584	-0.015175207	-0.032768487	0.029214976	-0.012788024
AGRN_+_955534.23-P1P2|AGRN_+_955472.23-P1P2	AGRN	1110	1353	1111	1703	1628	3136	1652	2084	0.01436609	0.022948599	0.02216267	0.014604812
AGRP_+_67517230.23-P1P2|AGRP_+_67517365.23-P1P2	AGRP	629	779	605	765	1483	2860	1827	1972	0.016721511	-0.005508568	0.022314958	-0.009913812
AGT_+_230849819.23-P1P2|AGT_-_230849666.23-P1P2	AGT	1222	1154	1177	1575	1326	1888	1440	1365	-0.023718846	0.002882969	-0.018579816	-0.030332322
AGTPBP1_-_88356691.23-P1P2|AGTPBP1_-_88356703.23-P1P2	AGTPBP1	630	465	689	471	1109	808	1451	569	-0.060445398	-0.096270463	-0.108841722	-0.169034042
AGTR1_-_148415748.23-P1P2|AGTR1_-_148415793.23-P1P2	AGTR1	612	581	682	1301	1211	1829	1257	1647	-0.022925509	0.05522354	-0.010635926	0.02056159
AGTR2_-_115301994.23-P1P2|AGTR2_-_115302232.23-P1P2	AGTR2	427	349	512	683	411	921	545	602	-0.045222399	0.002381894	0.042417201	-0.006300707
AGTRAP_+_11796247.23-P1P2|AGTRAP_+_11796254.23-P1P2	AGTRAP	879	1053	866	1374	1277	2306	1689	1585	0.011770905	0.028026383	0.013445964	-0.031915487
AGXT_+_241808192.23-P1P2|AGXT_-_241808273.23-P1P2	AGXT					1478	1706	1746	1291			-0.046861435	-0.069390194
AGXT2_-_35047966.23-P1P2|AGXT2_-_35047958.23-P1P2	AGXT2	189	297	191	258	660	1070	799	894	0.052041451	0.004104054	-0.001123556	-0.004269014
AHCTF1_+_247095176.23-P1P2|AHCTF1_-_247095134.23-P1P2	AHCTF1	405	38	527	128	1312	1878	1735	1625	-0.365064824	-0.248458717	-0.01786544	-0.032221835
AHCY_-_32891145.23-P1P2|AHCY_-_32890950.23-P1P2	AHCY	558	108	606	40	479	111	500	90	-0.259328431	-0.438503168	-0.262410657	-0.290284263
AHCYL1_-_110527422.23-P1|AHCYL1_+_110527472.23-P1	AHCYL1	475	174	366	149	1029	797	1140	519	-0.164616889	-0.172398338	-0.10060206	-0.14555614
AHCYL2_+_128864979.23-P1P2|AHCYL2_-_128864878.23-P1P2	AHCYL2	320	527	419	638	294	583	356	436	0.059148254	0.021888974	0.025887389	0.009888186
AHDC1_+_27930650.23-P1P2|AHDC1_+_27930664.23-P1P2	AHDC1	585	874	699	976	1047	1739	1142	1654	0.044698743	0.009140719	0.002167311	0.036310935
AHI1_-_135818658.23-P1P2|AHI1_-_135818819.23-P1P2	AHI1	572	826	569	730	1083	2508	1345	1720	0.039623157	-0.003368927	0.046961622	0.016743092
AHNAK_-_62314257.23-P1|AHNAK_-_62314203.23-P1	AHNAK	1299	1870	1190	1613	2323	3403	2949	3064	0.039203461	0.004782474	-0.014732466	-0.01590648
AHNAK_+_62313083.23-P2|AHNAK_+_62313086.23-P2	AHNAK	646	1030	760	1051	1068	1885	1516	1628	0.05441141	0.007722964	0.010356025	-0.01071636
AHNAK2_-_105436753.23-P1|AHNAK2_-_105436781.23-P1	AHNAK2	890	988	933	1292	1326	2010	1511	1612	0.000409171	0.007934181	-0.010141462	-0.011749862
AHNAK2_+_105444688.23-P2|AHNAK2_-_105444648.23-P2	AHNAK2	1116	1173	1181	1365	2057	3613	2561	2342	-0.007742161	-0.018756431	0.00972852	-0.03598125
AHR_-_17338343.23-P1P2|AHR_+_17338317.23-P1P2	AHR	147	202	130	229	731	1082	844	907	0.032017604	0.043061151	-0.013377633	-0.010609987
AHRR_+_321892.23-P1P2|AHRR_+_322709.23-P1P2	AHRR	434	361	574	397	1639	2703	1985	2143	-0.04261058	-0.094527023	0.001228129	-0.009879526
AHSA1_-_77924524.23-P1P2|AHSA1_-_77924606.23-P1P2	AHSA1	96	169	70	161	1393	2353	1768	2103	0.068621697	0.08179433	0.004450972	0.005361627
AHSA2_+_61404654.23-P1P2|AHSA2_+_61404634.23-P1P2	AHSA2	803	827	787	979	1737	2941	2101	2372	-0.010782322	-0.007910256	0.004776711	-0.002844614
AHSG_+_186330893.23-P1P2|AHSG_+_186330836.23-P1P2	AHSG	667	865	718	852	2054	3564	2398	2892	0.023594868	-0.014880763	0.00808461	0.007535292
AHSP_-_31539252.23-P1P2|AHSP_+_31539439.23-P1P2	AHSP	420	478	490	383	985	1993	1189	1320	0.004100717	-0.07647612	0.028761449	-0.005492437
AICDA_+_8765390.23-P1P2|AICDA_+_8765359.23-P1P2	AICDA	467	538	613	1022	737	1112	687	836	0.005919694	0.035318173	-0.010794158	0.008918705
AIDA_+_222885817.23-P1P2|AIDA_+_222886084.23-P1P2	AIDA	951	1014	1079	1078	1373	1852	1636	1812	-0.005605202	-0.040279372	-0.025867054	-0.005857136
AIF1_+_31583079.23-P1P2|AIF1_-_31583032.23-P1P2	AIF1	645	506	702	1062	1897	3337	2141	2594	-0.051360343	0.020978974	0.009929496	0.008259708
AIF1L_+_133971957.23-P1P2|AIF1L_+_133971935.23-P1P2	AIF1L	950	1128	944	1333	2659	3895	3186	3148	0.010448835	0.01081785	-0.01473747	-0.023810229
AIFM1_-_129299770.23-P1P2|AIFM1_+_129299661.23-P1P2	AIFM1	511	561	603	797	1416	2035	1657	1747	-0.001259439	0.001029711	-0.017323416	-0.013606691
AIFM2_+_71892557.23-P1P2|AIFM2_+_71892542.23-P1P2	AIFM2	931	1098	843	1138	540	907	783	920	0.009440686	0.004166253	0.003626668	0.003414718
AIFM3_-_21321575.23-P1|AIFM3_-_21321616.23-P1	AIFM3	851	857	1140	1413	1774	3313	2343	2694	-0.014127151	-0.008433083	0.017990301	3.03E-05
AIFM3_+_21319479.23-P2|AIFM3_+_21319522.23-P2	AIFM3	698	900	675	772	1189	1978	1468	1508	0.022737283	-0.020322239	0.002388008	-0.017696415
AIG1_+_143382079.23-P1P2|AIG1_+_143382050.23-P1P2	AIG1	769	848	838	1197	907	1503	1255	1302	-0.000588653	0.012509731	0.001848786	-0.016143284
AIM1_-_106960473.23-P1P2|AIM1_-_106960486.23-P1P2	AIM1	896	1401	856	816	1222	2087	1352	1626	0.051523184	-0.047207925	0.005928874	0.007090281
AIM1L_+_26680595.23-P1|AIM1L_+_26680576.23-P1	AIM1L	896	918	775	1282	944	1511	966	1161	-0.011556483	0.034180573	-0.002821164	0.006977943
AIM1L_+_26662903.23-P2|AIM1L_+_26662898.23-P2	AIM1L	986	1178	1108	973	693	1176	745	844	0.011371556	-0.059329499	0.00503256	-0.002318302
AIM2_-_159046491.23-P1P2|AIM2_+_159046458.23-P1P2	AIM2	480	437	502	581	655	1049	804	715	-0.029161338	-0.018578839	-0.00276979	-0.040355914
AIMP1_+_107237731.23-P1P2|AIMP1_+_107237742.23-P1P2	AIMP1	693	630	800	1038	1338	2028	1679	1550	-0.029388008	-0.001687368	-0.010153781	-0.034492594
AIMP2_+_6048922.23-P1P2|AIMP2_-_6048940.23-P1P2	AIMP2	140	248	151	276	825	1604	1063	1045	0.069757565	0.048568077	0.023373949	-0.024607398
AIP_+_67250544.23-P1P2|AIP_-_67250576.23-P1P2	AIP	88	179	105	185	486	823	520	722	0.090013164	0.042976244	0.004716281	0.029626798
AIPL1_-_6338440.23-P1P2|AIPL1_-_6338416.23-P1P2	AIPL1	795	744	927	986	977	1349	1138	1221	-0.025064234	-0.031031244	-0.022729469	-0.010856925
AIRE_-_45705829.23-P1P2|AIRE_+_45705833.23-P1P2	AIRE	513	697	557	671	1052	1681	1167	1551	0.030524449	-0.012663331	-0.003045429	0.022797573
AJAP1_-_4714684.23-P1P2|AJAP1_-_4714913.23-P1P2	AJAP1	879	789	836	788	1998	2590	2512	1802	-0.031288133	-0.048872187	-0.031217553	-0.074159849
AJUBA_+_23451722.23-P1P2|AJUBA_-_23451680.23-P1P2	AJUBA	943	972	841	1164	1025	1895	1155	1258	-0.010656268	0.007853238	0.016604661	-0.008494837
AK1_-_130639906.23-P1P2|AK1_+_130639940.23-P1P2	AK1	1265	1447	1313	1351	1890	2915	2304	2042	0.004885269	-0.035928314	-0.007795981	-0.040906443
AK2_+_33502475.23-P1P2|AK2_+_33502194.23-P1P2	AK2	488	734	582	942	768	1398	1013	1306	0.045685019	0.03093972	0.014493654	0.018011663
AK3_-_4741156.23-P1P2|AK3_-_4741205.23-P1P2	AK3	1197	1432	1089	1408	1594	2715	1757	2068	0.011575383	-0.002197412	0.005576514	0.003703821
AK4_-_65613902.23-P1P2|AK4_+_65613321.23-P1P2	AK4	992	1068	1250	1702	963	1437	1106	1177	-0.004161104	0.005451478	-0.012271003	-0.012142881
AK5_-_77747738.23-P1P2|AK5_-_77747887.23-P1P2	AK5	565	631	523	566	1133	1733	1501	1635	0.001297102	-0.028484456	-0.008932252	-0.008478364
AK7_+_96858485.23-P1P2|AK7_-_96858538.23-P1P2	AK7	515	491	501	599	345	629	387	494	-0.022288328	-0.013782283	0.01460948	0.016394475
AK8_+_135753659.23-P1P2|AK8_-_135753634.23-P1P2	AK8	787	1176	984	1048	1730	2472	1901	2145	0.044746821	-0.03083721	-0.01809363	-0.002933665
AK9_+_110012406.23-P1P2|AK9_-_110012454.23-P1P2	AK9	764	925	796	902	885	1607	1063	1429	0.013349891	-0.021684831	0.01417107	0.024589145
AKAP1_-_55162653.23-P1P2|AKAP1_-_55162661.23-P1P2	AKAP1	675	1118	770	1241	1716	2584	2137	2328	0.060095485	0.030335265	-0.011026553	-0.008460823
AKAP10_+_19881070.23-P1P2|AKAP10_+_19881078.23-P1P2	AKAP10	690	728	1044	1123	1842	2894	2227	2446	-0.007180061	-0.029369992	-0.005303839	-0.007172265
AKAP11_+_42846479.23-P1P2|AKAP11_+_42846376.23-P1P2	AKAP11	250	138	201	64	870	235	891	98	-0.103436333	-0.207749374	-0.242256469	-0.36778384
AKAP12_-_151561599.23-P1|AKAP12_-_151561609.23-P1	AKAP12	823	946	663	971	1194	2283	1271	1348	0.00560327	0.016186768	0.021148942	-0.01267643
AKAP12_+_151646850.23-P2|AKAP12_-_151646835.23-P2	AKAP12	763	887	805	1048	1110	2022	1486	1613	0.00728722	-0.00119132	0.014614873	-0.009029292
AKAP13_+_85923863.23-P1P2|AKAP13_+_85923876.23-P1P2	AKAP13	1171	1454	1041	1589	1768	2771	2097	2106	0.017127752	0.022323901	-0.005632257	-0.021249608
AKAP14_+_119030185.23-P1P2|AKAP14_+_119030176.23-P1P2	AKAP14	469	842	459	616	517	1007	732	865	0.07207861	0.003262952	0.023571334	0.004309628
AKAP17A_-_1710549.23-P1P2|AKAP17A_+_1710540.23-P1P2	AKAP17A	289	248	286	236	292	255	321	119	-0.037939923	-0.068437899	-0.084393945	-0.17721492
AKAP2_+_112811051.23-P1P2|AKAP2_+_112811196.23-P1P2	AKAP2	1207	1244	1319	1430	2047	2766	2432	2664	-0.010669483	-0.028207426	-0.025621629	-0.007593819
AKAP3_-_4758224.23-P1|AKAP3_-_4758021.23-P1	AKAP3	725	301	731	321	460	386	686	504	-0.146171169	-0.161534137	-0.089784256	-0.070344738
AKAP3_-_4754248.23-P2|AKAP3_-_4754290.23-P2	AKAP3	433	312	521	710	995	1905	1220	1621	-0.063988083	0.005533764	0.021315151	0.022756388
AKAP4_+_49964995.23-P1P2|AKAP4_+_49964966.23-P1P2	AKAP4	388	527	407	492	914	1584	1027	1314	0.030452927	-0.012169234	0.007886059	0.016814395
AKAP5_+_64932289.23-P1P2|AKAP5_-_64932236.23-P1P2	AKAP5	553	881	626	819	1505	2314	1712	1928	0.054275381	-0.000474565	-0.008221302	-0.003239536
AKAP6_-_32798545.23-P1P2|AKAP6_+_32798551.23-P1P2	AKAP6	545	510	685	1014	1217	2329	1258	1691	-0.025069374	0.017767318	0.021267053	0.024581979
AKAP7_+_131456600.23-P1P2|AKAP7_-_131456599.23-P1P2	AKAP7	704	974	712	818	1237	1887	1422	1250	0.033249116	-0.019654595	-0.009290739	-0.042190666
AKAP8_+_15490555.23-P1P2|AKAP8_+_15490566.23-P1P2	AKAP8	536	308	555	670	1338	1320	1583	2068	-0.097713017	-0.012352698	-0.068017182	0.020101066
AKAP8L_-_15529738.23-P1P2|AKAP8L_+_15529720.23-P1P2	AKAP8L	163	214	167	168	824	1027	1039	851	0.025263804	-0.039265185	-0.036531226	-0.053292555
AKAP9_+_91570225.23-P1P2|AKAP9_+_91570248.23-P1P2	AKAP9	745	801	697	949	1013	1597	1256	1354	-0.004364999	0.005421133	-0.004864355	-0.010111923
AKIP1_-_8932793.23-P1P2|AKIP1_-_8932799.23-P1P2	AKIP1	620	739	556	913	721	1202	825	1034	0.01100823	0.033066252	0.002645565	0.013564072
AKIRIN1_+_39456935.23-P1P2|AKIRIN1_-_39457004.23-P1P2	AKIRIN1	528	540	609	414	1062	1173	1376	1124	-0.01182522	-0.097078701	-0.052800705	-0.053722802
AKIRIN2_+_88411936.23-P1P2|AKIRIN2_+_88411931.23-P1P2	AKIRIN2	488	518	509	587	1507	2457	1542	1737	-0.00628286	-0.019105667	-0.000318679	-0.003200056
AKNA_+_117150220.23-P1|AKNA_+_117150244.23-P1	AKNA	1237	1492	1744	1967	1305	2087	1728	1440	0.012796103	-0.022365475	-0.002924443	-0.050589103
AKNA_+_117160706.23-P2|AKNA_+_117160729.23-P2	AKNA	996	1178	831	901	796	871	776	901	0.009866026	-0.028201467	-0.05406635	0.001546161
AKNAD1_+_109399657.23-ENST00000370001.3|AKNAD1_+_109399646.23-ENST00000370001.3	AKNAD1	338	261	398	629	1005	1807	1158	1606	-0.053655379	0.027374269	0.012851029	0.029493438
AKR1A1_+_46016701.23-P1P2|AKR1A1_-_46016592.23-P1P2	AKR1A1	348	231	417	415	877	719	989	532	-0.076158875	-0.040851397	-0.09294228	-0.119337789
AKR1B1_+_134143839.23-P1P2|AKR1B1_-_134143848.23-P1P2	AKR1B1	675	912	678	1130	982	2163	1228	1446	0.029710053	0.035279225	0.040203628	0.003767227
AKR1B10_+_134212317.23-P1P2|AKR1B10_+_134212298.23-P1P2	AKR1B10	944	1132	1027	1342	415	765	580	679	0.01192227	-0.000632293	0.01612173	0.002831194
AKR1B15_+_134234041.23-P1P2|AKR1B15_-_134233853.23-P1P2	AKR1B15	397	502	464	596	964	1961	1052	1376	0.019792699	-0.003205943	0.029482788	0.020282289
AKR1C1_+_5005615.23-P1P2|AKR1C1_+_5005619.23-P1P2	AKR1C1	658	622	659	838	699	1172	711	773	-0.023565093	-0.004670639	0.003412881	-0.008787155
AKR1C2_-_5046012.23-P1|AKR1C2_+_5046039.23-P1	AKR1C2	584	500	664	830	444	819	548	592	-0.038324898	-0.007202467	0.016220581	-0.009793738
AKR1C2_-_5060075.23-P2|AKR1C2_+_5059865.23-P2	AKR1C2	696	752	583	935	1407	2537	1831	1522	-0.003633674	0.029585035	0.013251063	-0.050985616
AKR1C3_-_5136634.23-P1P2|AKR1C3_-_5136639.23-P1P2	AKR1C3	706	756	710	1118	767	1233	892	1167	-0.004969918	0.026895323	-0.002251792	0.020313376
AKR1C4_+_5239007.23-P1P2|AKR1C4_-_5239039.23-P1P2	AKR1C4	209	247	228	163	945	1230	963	1270	0.00966442	-0.089492008	-0.030685952	0.021573003
AKR1D1_+_137761243.23-P1P2|AKR1D1_+_137761259.23-P1P2	AKR1D1	415	402	407	511	657	1355	755	860	-0.01991679	-0.006579463	0.031302741	-0.001462108
AKR1E2_+_4868442.23-P1P2|AKR1E2_+_4868462.23-P1P2	AKR1E2	1012	1395	1183	1649	1280	1800	1387	1446	0.032719697	0.008914623	-0.020255201	-0.015373739
AKR7A2_-_19638512.23-P1P2|AKR7A2_-_19638583.23-P1P2	AKR7A2	1223	1492	1571	1800	1794	3501	2159	2524	0.014494628	-0.020040292	0.023919335	0.002640953
AKR7A3_+_19615549.23-P1P2|AKR7A3_-_19614864.23-P1P2	AKR7A3	978	1210	1019	1313	1019	1665	1286	1442	0.016586501	-0.002704313	-4.10E-05	-0.003923151
AKT1_+_105261633.23-P1P2|AKT1_+_105262020.23-P1P2	AKT1	626	572	615	500	1227	1689	1834	1236	-0.028625549	-0.070687496	-0.02313511	-0.083966096
AKT1S1_+_50379848.23-P1P2|AKT1S1_+_50379851.23-P1P2	AKT1S1	673	1063	810	1357	2050	3443	2498	2647	0.053010886	0.03605732	0.003691523	-0.012811594
AKT2_+_40791298.23-P1P2|AKT2_-_40791096.23-P1P2	AKT2	388	154	436	210	705	643	767	407	-0.152597768	-0.147764395	-0.078585594	-0.12143639
AKT3_-_244013539.23-P1P2|AKT3_-_244013349.23-P1P2	AKT3	927	1108	989	1235	779	1228	774	952	0.011435834	-0.007337285	-0.00488967	0.010604729
AKTIP_+_53537096.23-P1P2|AKTIP_+_53536913.23-P1P2	AKTIP	642	1099	732	962	2006	3442	2052	2135	0.065012462	0.00019799	0.006576374	-0.015687734
ALAD_+_116163528.23-P1P2|ALAD_-_116163546.23-P1P2	ALAD	141	72	165	104	1625	1149	2124	931	-0.114546072	-0.107846735	-0.112892687	-0.15159166
ALAS1_+_52232365.23-P1P2|ALAS1_-_52232194.23-P1P2	ALAS1	833	266	570	176	1329	629	1577	542	-0.185279518	-0.213271681	-0.166940268	-0.18976092
ALAS2_-_55057349.23-P1P2|ALAS2_+_55057338.23-P1P2	ALAS2	518	581	613	824	1027	1760	1103	1395	0.001935002	0.003521029	0.006382831	0.01499719
ALB_-_74270053.23-P1|ALB_+_74270025.23-P1	ALB	124	54	78	131	418	823	499	577	-0.137786446	0.035740077	0.024993994	0.000884063
ALB_+_74275112.23-P2|ALB_+_74275099.23-P2	ALB	434	421	463	642	727	1111	792	903	-0.019706511	0.008084397	-0.009075881	-0.001312173
ALCAM_+_105085800.23-P1P2|ALCAM_+_105085743.23-P1P2	ALCAM	1323	1498	1568	1652	1888	2942	2376	2648	0.003364882	-0.032433283	-0.006410609	-0.00487771
ALDH16A1_+_49956535.23-P1P2|ALDH16A1_-_49956532.23-P1P2	ALDH16A1	715	846	652	935	831	1366	1001	1174	0.009918208	0.013077389	0.000756958	0.003134538
ALDH18A1_+_97416448.23-P1P2|ALDH18A1_+_97416086.23-P1P2	ALDH18A1	396	201	441	221	1475	1116	1708	913	-0.116084494	-0.14193411	-0.103768401	-0.120383955
ALDH1A1_-_75567941.23-P1P2|ALDH1A1_-_75567897.23-P1P2	ALDH1A1	720	842	793	1353	761	1529	855	1208	0.008171933	0.038752726	0.027795364	0.032398801
ALDH1A2_-_58357877.23-P1P2|ALDH1A2_+_58357872.23-P1P2	ALDH1A2	631	856	1125	1217	1537	2370	1789	2187	0.030308297	-0.028533085	-0.007833476	0.009663971
ALDH1A3_-_101419689.23-P1|ALDH1A3_-_101419642.23-P1	ALDH1A3	719	274	655	235	1800	2341	2370	1886	-0.158919025	-0.191260161	-0.030777146	-0.057844687
ALDH1B1_+_38392957.23-P1P2|ALDH1B1_+_38392764.23-P1P2	ALDH1B1	640	504	760	822	788	1326	965	1201	-0.050790214	-0.028564984	0.003907739	0.012465351
ALDH1L1_-_125899391.23-P1P2|ALDH1L1_-_125899333.23-P1P2	ALDH1L1	1133	1652	1273	1806	1261	2231	1569	1838	0.041104926	0.011520595	0.010688482	0.00295773
ALDH1L2_-_105478237.23-P1P2|ALDH1L2_+_105477985.23-P1P2	ALDH1L2	550	753	554	799	711	1723	770	861	0.031668707	0.013905944	0.053042268	-0.004370505
ALDH2_+_112204799.23-P1P2|ALDH2_+_112204778.23-P1P2	ALDH2	1068	1476	1055	1299	1585	2471	1953	2030	0.033107192	-0.009414798	-0.006352559	-0.015842395
ALDH3A1_+_19651582.23-P1P2|ALDH3A1_-_19651612.23-P1P2	ALDH3A1	117	55	80	97	1464	1734	1655	1238	-0.126488678	-0.011980571	-0.043385361	-0.067563907
ALDH3A2_-_19552119.23-P1P2|ALDH3A2_+_19552078.23-P1P2	ALDH3A2	1061	1642	1085	1210	1271	2038	1870	1795	0.049995468	-0.024038469	-0.00256965	-0.028359514
ALDH3B1_+_67777809.23-P1P2|ALDH3B1_+_67777830.23-P1P2	ALDH3B1	745	578	710	767	1553	2650	1772	2028	-0.053023269	-0.028743183	0.005821664	-0.000704276
ALDH3B2_+_67442058.23-P1P2|ALDH3B2_+_67442070.23-P1P2	ALDH3B2	732	282	735	324	1522	992	1623	602	-0.157308866	-0.16096888	-0.123860624	-0.177792395
ALDH4A1_-_19228972.23-P1P2|ALDH4A1_-_19229032.23-P1P2	ALDH4A1	864	1067	999	1238	1578	2208	1909	2177	0.016309225	-0.008464552	-0.020923001	-0.001265346
ALDH5A1_+_24495207.23-P1P2|ALDH5A1_+_24495537.23-P1P2	ALDH5A1	567	723	716	1066	713	1152	841	974	0.021066902	0.018619358	-0.001575871	0.001150212
ALDH6A1_+_74551093.23-P1P2|ALDH6A1_+_74551090.23-P1P2	ALDH6A1	752	814	779	882	1530	2459	1756	1817	-0.003358416	-0.021808494	-0.002249937	-0.016553602
ALDH7A1_+_125930884.23-P1P2|ALDH7A1_-_125930901.23-P1P2	ALDH7A1	292	304	272	392	923	1448	1117	1255	-0.00918053	0.013712924	-0.005529488	-0.003611588
ALDH8A1_+_135271208.23-P1P2|ALDH8A1_-_135271197.23-P1P2	ALDH8A1	737	782	797	1097	703	1162	678	983	-0.006335508	0.007031474	0.001490225	0.03644626
ALDH9A1_-_165667740.23-P1P2|ALDH9A1_-_165667800.23-P1P2	ALDH9A1	814	718	872	1298	1164	1965	1379	1593	-0.033892421	0.018602219	0.00436215	0.000757778
ALDOA_+_30077139.23-P1P2|ALDOA_+_30077177.23-P1P2	ALDOA	271	23	323	13	714	190	724	84	-0.377752882	-0.504537428	-0.244170931	-0.35915821
ALDOB_-_104197973.23-P1|ALDOB_-_104198032.23-P1	ALDOB	498	461	534	790	743	1116	808	995	-0.026681104	0.017658666	-0.011402215	0.010792966
ALDOB_-_104187759.23-P2|ALDOB_-_104187762.23-P2	ALDOB	1253	1499	1230	1789	1075	1806	1134	1664	0.011576879	0.015198628	0.003706549	0.038363723
ALDOC_+_26903892.23-P1P2|ALDOC_-_26903885.23-P1P2	ALDOC	468	422	552	640	1140	1780	1223	1503	-0.030592418	-0.018314072	-0.00615604	0.010487074
ALG1_+_5122044.23-P1P2|ALG1_+_5122098.23-P1P2	ALG1	443	93	560	161	1051	1412	1222	796	-0.247041357	-0.223749711	-0.026414168	-0.089291964
ALG10_+_34175434.23-P1P2|ALG10_+_34175364.23-P1P2	ALG10	318	323	459	575	755	1538	868	993	-0.012852496	-0.006901154	0.029652031	-0.000779156
ALG10B_+_38710525.23-P1P2|ALG10B_+_38710933.23-P1P2	ALG10B	471	381	620	813	1069	1535	1256	1558	-0.046770882	-0.0001388	-0.017447751	0.011952207
ALG11_-_52586543.23-P1P2|ALG11_+_52586530.23-P1P2	ALG11	297	115	240	72	810	628	743	456	-0.156084889	-0.216685963	-0.100457968	-0.098597927
ALG12_+_50312054.23-P1P2|ALG12_-_50312053.23-P1P2	ALG12	1098	1885	1210	1712	1315	2220	1547	1783	0.065480931	0.011120499	0.004373042	0.000400829
ALG13_+_110924898.23-P1P2|ALG13_+_110924465.23-P1P2	ALG13	1120	158	1231	91	1925	872	2137	645	-0.306861295	-0.423669549	-0.172879673	-0.210217047
ALG14_+_95538352.23-P1P2|ALG14_+_95538302.23-P1P2	ALG14	733	65	633	82	647	836	839	594	-0.374931121	-0.340685432	-0.031684537	-0.07617603
ALG1L_-_125655482.23-ENST00000340333.3|ALG1L_-_125655452.23-ENST00000340333.3	ALG1L	1317	1684	1307	1825	604	1208	577	900	0.02151198	0.009173566	0.027154097	0.047919638
ALG2_-_101984133.23-P1P2|ALG2_+_101984159.23-P1P2	ALG2	600	167	701	154	1290	1515	1463	1508	-0.205537915	-0.263421417	-0.044530617	-0.017160009
ALG3_-_183966701.23-P1P2|ALG3_+_183966721.23-P1P2	ALG3	855	767	915	1179	1057	2066	1182	1417	-0.031376499	-0.00270726	0.02410658	0.006583743
ALG5_+_37573433.23-P1P2|ALG5_+_37573440.23-P1P2	ALG5	682	852	845	1144	1456	2363	1741	1971	0.018019427	0.004593013	-0.000937308	-0.002412171
ALG6_+_63833373.23-P1P2|ALG6_-_63833380.23-P1P2	ALG6	908	899	1075	1139	898	1634	1113	1188	-0.016661262	-0.031601893	0.014452267	-0.011672307
ALG8_+_77850627.23-P1P2|ALG8_-_77850641.23-P1P2	ALG8	801	554	851	903	1354	2152	1595	1932	-0.070156	-0.031385336	-0.003757279	0.008216625
ALG9_-_111742019.23-P1P2|ALG9_+_111742236.23-P1P2	ALG9	911	990	1086	1006	1350	2429	1446	1709	-0.002768247	-0.051442467	0.012959839	0.004350803
ALK_+_30144436.23-P1P2|ALK_-_30144395.23-P1P2	ALK	577	879	659	934	1648	2439	2001	2100	0.047602643	0.01134325	-0.013361552	-0.014329373
ALKBH1_+_78174341.23-P1P2|ALKBH1_-_78174295.23-P1P2	ALKBH1	362	122	443	150	1060	1469	1257	1252	-0.176801628	-0.19956981	-0.022230548	-0.022549623
ALKBH2_+_109531250.23-P1P2|ALKBH2_+_109531240.23-P1P2	ALKBH2	640	1190	905	816	1520	2551	2026	2248	0.077348308	-0.055426761	0.003584095	-0.005572188
ALKBH3_-_43902421.23-P1P2|ALKBH3_+_43902434.23-P1P2	ALKBH3	710	911	937	1017	1311	1748	1496	1284	0.022007429	-0.028044312	-0.027429513	-0.045947699
ALKBH4_-_102105260.23-P1P2|ALKBH4_-_102105269.23-P1P2	ALKBH4	264	427	234	375	602	1131	739	866	0.056420905	0.02933214	0.018727635	0.002995876
ALKBH5_-_18087161.23-P1P2|ALKBH5_-_18087156.23-P1P2	ALKBH5	548	511	521	770	1137	2054	1205	1391	-0.025595739	0.017509307	0.013493409	0.000642832
ALKBH6_+_36505031.23-P1P2|ALKBH6_+_36505140.23-P1P2	ALKBH6	575	685	721	994	782	1226	854	1154	0.010926218	0.00726511	-0.005626852	0.025393892
ALKBH7_+_6372803.23-P1P2|ALKBH7_+_6372823.23-P1P2	ALKBH7	636	537	831	1205	1609	2926	1914	1959	-0.040401625	0.014731993	0.014402215	-0.018268841
ALKBH8_+_107436425.23-P1P2|ALKBH8_-_107436413.23-P1P2	ALKBH8	273	220	343	306	1162	1582	1416	1372	-0.047279712	-0.056963128	-0.024621327	-0.026885787
ALLC_-_3705821.23-P1P2|ALLC_+_3706035.23-P1P2	ALLC	445	422	489	676	1359	2080	1536	1427	-0.023082665	0.00764179	-0.008840004	-0.033495717
ALMS1_+_73612991.23-P1P2|ALMS1_-_73612999.23-P1P2	ALMS1	412	390	496	644	997	1594	1173	1247	-0.023350484	-0.001612388	-0.002973239	-0.012306326
ALOX12_+_6899415.23-P1P2|ALOX12_+_6899409.23-P1P2	ALOX12	453	434	421	650	545	1133	658	658	-0.021559979	0.023936919	0.032354152	-0.021923068
ALOX12B_+_7990948.23-P1P2|ALOX12B_-_7991020.23-P1P2	ALOX12B	568	945	805	861	2040	2881	2231	2572	0.060747312	-0.030213339	-0.019669552	0.000444917
ALOX15_-_4544920.23-P1P2|ALOX15_+_4544912.23-P1P2	ALOX15	1172	1509	1069	1889	1925	3958	2022	3174	0.022541722	0.043953404	0.030959814	0.04898863
ALOX15B_-_7942419.23-P1P2|ALOX15B_-_7942393.23-P1P2	ALOX15B	712	759	771	1394	1446	2317	1672	1693	-0.00564132	0.047315794	-0.002658197	-0.019960535
ALOX5_+_45869730.23-P1P2|ALOX5_+_45869734.23-P1P2	ALOX5	715	676	767	889	1398	1983	1777	2029	-0.023539985	-0.018349507	-0.019088065	-0.001069807
ALOX5AP_+_31309673.23-P1P2|ALOX5AP_+_31309779.23-P1P2	ALOX5AP	686	711	740	1129	1193	2348	1581	1650	-0.009836993	0.022232286	0.025045376	-0.015206545
ALOXE3_-_8021474.23-P1P2|ALOXE3_-_8021463.23-P1P2	ALOXE3	379	274	592	794	166	226	176	240	-0.063474151	0.003189809	-0.024805062	0.026635687
ALPI_+_233320899.23-P1P2|ALPI_+_233320877.23-P1P2	ALPI	785	773	817	750	2090	2781	2460	3160	-0.017472903	-0.052774401	-0.027694299	0.017459306
ALPK1_-_113218819.23-P1P2|ALPK1_+_113218559.23-P1P2	ALPK1	199	84	159	335	909	1455	974	1352	-0.142966641	0.069528597	-0.002821164	0.02962412
ALPK2_+_56296241.23-ENST00000361673.3|ALPK2_-_56296111.23-ENST00000361673.3	ALPK2	340	346	419	470	1085	1660	1090	1255	-0.012570246	-0.023202099	-0.008900036	0.00023455
ALPK3_-_85360424.23-P1P2|ALPK3_-_85360414.23-P1P2	ALPK3	422	495	560	815	1147	1782	1381	1528	0.008601445	0.015243664	-0.006829374	-0.006020038
ALPL_+_21835978.23-P1|ALPL_+_21835943.23-P1	ALPL	468	582	485	560	1004	1291	1013	1249	0.017320441	-0.018928869	-0.032322223	0.010996282
ALPL_+_21877779.23-P2|ALPL_-_21877787.23-P2	ALPL	800	955	756	858	1391	2054	1657	1799	0.01124388	-0.021457519	-0.013670951	-0.008994726
ALPP_+_233243502.23-P1P2|ALPP_+_233243599.23-P1P2	ALPP	762	939	650	1037	1528	1992	1795	1899	0.015981905	0.028820366	-0.030458416	-0.01306679
ALPPL2_+_233271581.23-P1P2|ALPPL2_+_233271588.23-P1P2	ALPPL2	584	770	671	950	640	908	739	1110	0.026056081	0.011187899	-0.019093684	0.042009499
ALS2_-_202645613.23-P1P2|ALS2_+_202645584.23-P1P2	ALS2	147	221	169	254	1389	2016	1571	1530	0.045379918	0.019792242	-0.015993659	-0.026080858
ALS2CL_+_46735125.23-P1P2|ALS2CL_+_46735113.23-P1P2	ALS2CL	906	1057	865	1050	349	761	495	548	0.007823258	-0.011523205	0.038708198	-0.005950764
ALS2CR11_+_202483870.23-P1P2|ALS2CR11_+_202483880.23-P1P2	ALS2CR11	998	1183	1059	1300	1048	1548	1201	1216	0.010198758	-0.009859992	-0.013638868	-0.019971894
ALS2CR12_+_202222032.23-P1P2|ALS2CR12_+_202222077.23-P1P2	ALS2CR12	652	726	748	949	1267	1917	1400	1765	0.00085713	-0.005002912	-0.010393494	0.014503146
ALX1_+_85674007.23-P1P2|ALX1_+_85674064.23-P1P2	ALX1	515	588	570	602	1058	1693	1122	1573	0.004586343	-0.032082271	-0.002852997	0.031193356
ALX3_-_110613186.23-P1P2|ALX3_-_110613212.23-P1P2	ALX3	756	786	729	1140	1219	1980	1570	1513	-0.009370824	0.025875021	-0.000832769	-0.02773746
ALX4_-_44331565.23-P1P2|ALX4_-_44331571.23-P1P2	ALX4	797	1145	958	994	1392	2084	1818	2170	0.038877215	-0.034695134	-0.011813667	0.005908358
ALYREF_-_79849458.23-P1P2|ALYREF_+_79849212.23-P1P2	ALYREF	144	35	164	28	874	274	1031	283	-0.223248094	-0.297144614	-0.222253248	-0.224919812
AMACR_+_34008110.23-P1P2|AMACR_-_34008125.23-P1P2	AMACR	609	673	582	714	1851	3250	2158	2444	-0.000274653	-0.009973654	0.009676738	-0.002351507
AMBN_+_71458058.23-P1P2|AMBN_+_71457964.23-P1P2	AMBN	582	536	609	910	589	1180	642	815	-0.027449927	0.01914463	0.027379789	0.015563345
AMBP_+_116840506.23-P1P2|AMBP_-_116840545.23-P1P2	AMBP	588	746	752	734	1141	1725	1509	1815	0.020315539	-0.043718835	-0.010503602	0.007108082
AMBRA1_+_46615541.23-P1P2|AMBRA1_-_46615538.23-P1P2	AMBRA1	820	1421	811	2136	1180	3217	1358	2486	0.06686075	0.102893961	0.068962337	0.073154473
AMD1_-_111196001.23-P1P2|AMD1_-_111196231.23-P1P2	AMD1	545	683	698	768	260	416	332	303	0.018478559	-0.026034741	-0.003015026	-0.036257949
AMDHD1_+_96337113.23-P1P2|AMDHD1_-_96337132.23-P1P2	AMDHD1	193	339	251	198	1400	2383	1618	1924	0.068621697	-0.075045648	0.005483077	0.005313078
AMDHD2_+_2570434.23-P1P2|AMDHD2_-_2570366.23-P1P2	AMDHD2	1017	1560	1113	1718	1921	3271	2500	2634	0.048668787	0.023978493	0.005542622	-0.013711738
AMELX_-_11311536.23-P1P2|AMELX_+_11311546.23-P1P2	AMELX	96	66	123	105	180	361	205	402	-0.070436454	-0.063326442	0.027265574	0.083653322
AMELY_+_6742063.23-P1P2|AMELY_-_6742053.23-P1P2	AMELY	247	125	293	486	267	434	239	422	-0.116305268	0.034458545	-0.000885603	0.067239773
AMER1_+_63425562.23-P1P2|AMER1_+_63425598.23-P1P2	AMER1	713	826	603	794	1286	2426	1672	2051	0.006767159	0.00047296	0.019336794	0.010202699
AMER2_-_25745692.23-P1P2|AMER2_+_25745684.23-P1P2	AMER2	875	914	876	1125	697	807	877	814	-0.00866994	-0.003200014	-0.046460757	-0.03363745
AMER3_+_131513347.23-P1P2|AMER3_+_131513159.23-P1P2	AMER3	678	615	620	958	2098	2858	2360	2797	-0.029717777	0.024092964	-0.024528028	0.004794262
AMFR_+_56459315.23-P1P2|AMFR_-_56459192.23-P1P2	AMFR	1129	1038	1042	1303	1408	2156	1606	1723	-0.027714246	-0.007129663	-0.008776055	-0.010866379
AMH_+_2248626.23-P1P2|AMH_-_2248783.23-P1P2	AMH	652	624	711	940	1171	1922	1504	1591	-0.021720424	0.001078613	0.000572695	-0.013081536
AMHR2_+_53818923.23-P1P2|AMHR2_+_53819137.23-P1P2	AMHR2	549	653	693	960	716	1651	903	1180	0.010690116	0.007972392	0.046346757	0.020128653
AMICA1_-_118095677.23-P1P2|AMICA1_-_118095755.23-P1P2	AMICA1	394	426	484	741	1139	1626	1393	1527	-0.003541313	0.022709449	-0.018231582	-0.007483158
AMIGO1_-_110052323.23-P1P2|AMIGO1_-_110052326.23-P1P2	AMIGO1	454	595	503	633	1740	2992	2188	2409	0.025140092	-0.00622245	0.006861469	-0.006790986
AMIGO2_+_47473698.23-P1P2|AMIGO2_-_47473651.23-P1P2	AMIGO2	989	1187	856	1242	1280	2003	1771	1767	0.012054028	0.01482264	-0.005854797	-0.022278611
AMIGO3_+_49761355.23-P1|AMIGO3_-_49761366.23-P1	AMIGO3	759	609	662	406	1246	1476	1734	1228	-0.048010629	-0.112271547	-0.043369159	-0.076170696
AMMECR1_-_109561250.23-P1P2|AMMECR1_+_109561312.23-P1P2	AMMECR1	1182	1859	1233	1743	1692	3272	1920	1724	0.052407873	0.010990515	0.022689091	-0.038854492
AMMECR1L_+_128643208.23-P1P2|AMMECR1L_-_128643556.23-P1P2	AMMECR1L	894	599	819	641	1536	2458	1890	2212	-0.07489831	-0.076315659	-0.00283213	0.002815654
AMN_+_103389039.23-P1|AMN_-_103389029.23-P1	AMN	986	1109	931	1327	953	1905	1300	1544	0.002364926	0.012199085	0.027124167	0.005120102
AMN_+_103395231.23-P2|AMN_-_103395024.23-P2	AMN	1399	1801	1448	1729	1511	1858	1933	1723	0.022523777	-0.01394219	-0.038335488	-0.040006822
AMN1_-_31881933.23-P1P2|AMN1_-_31881912.23-P1P2	AMN1	421	451	293	584	1489	2461	1735	1706	-0.004918501	0.061560477	0.001519633	-0.024573438
AMOT_-_112084054.23-P1P2|AMOT_-_112084018.23-P1P2	AMOT	867	688	896	1326	716	1088	829	977	-0.049667035	0.017745724	-0.009841068	0.003891886
AMOTL1_-_94501700.23-P1P2|AMOTL1_-_94501686.23-P1P2	AMOTL1	579	552	679	859	828	1482	1144	1220	-0.022294608	-0.00542913	0.012225816	-0.011812316
AMOTL2_+_134093279.23-P1P2|AMOTL2_+_134093271.23-P1P2	AMOTL2	820	1027	877	998	1115	1918	1244	1338	0.018405139	-0.021058041	0.006893395	-0.010471572
AMPD1_-_115238088.23-P1P2|AMPD1_-_115238116.23-P1P2	AMPD1	534	325	525	825	1137	2016	1180	1467	-0.08915729	0.026566472	0.010976838	0.012301905
AMPD2_-_110162501.23-P1|AMPD2_+_110162524.23-P1	AMPD2	880	1317	1028	1241	1545	2363	1820	1927	0.044983846	-0.01233279	-0.008931649	-0.012940066
AMPD2_+_110163780.23-P2|AMPD2_-_110163800.23-P2	AMPD2	235	227	192	319	3209	4663	3818	4091	-0.020325625	0.034598447	-0.015819053	-0.011060339
AMPD3_-_10476823.23-P1P2|AMPD3_-_10476980.23-P1P2	AMPD3	575	683	533	578	445	919	481	616	0.010490167	-0.028183055	0.031432878	0.016925061
AMPH_+_38670931.23-P1P2|AMPH_-_38670993.23-P1P2	AMPH	463	493	546	633	949	1340	1078	1417	-0.005818454	-0.018324612	-0.019714817	0.021060865
AMT_+_49459848.23-P1P2|AMT_-_49459857.23-P1P2	AMT	318	204	299	364			4	248	-0.081213769	-0.011153305		0.592915954
AMTN_+_71384334.23-P1P2|AMTN_+_71384355.23-P1P2	AMTN	98	78	68	174	419	638	434	504	-0.048878713	0.097427914	-0.009610444	0.001552176
AMY1B_-_104239004.23-ENST00000330330.5,ENST00000370080.3|AMY1B_-_104238984.23-ENST00000330330.5,ENST00000370080.3	AMY1B	293	217	352	501	597	1171	686	954	-0.059842704	0.011908705	0.024532413	0.029897066
AMY2A_+_104159553.23-P1P2|AMY2A_+_104159726.23-P1P2	AMY2A	627	616	631	864	1358	2410	1435	1782	-0.017814344	0.0062485	0.011105405	0.01212829
AMY2B_-_104104409.23-P1P2|AMY2B_-_104104404.23-P1P2	AMY2B	572	457	713	805	1261	1818	1366	1444	-0.048631474	-0.022226891	-0.016899507	-0.013192834
AMZ1_+_2727860.23-P1P2|AMZ1_+_2727832.23-P1P2	AMZ1	762	502	746	713	1772	3179	2320	2397	-0.077403432	-0.046821146	0.012577184	-0.016788375
AMZ2_-_66244231.23-P1P2|AMZ2_-_66244242.23-P1P2	AMZ2	792	942	801	1333	1789	2906	2135	2670	0.010698179	0.035071138	-0.000811857	0.013242507
ANAPC1_-_112641691.23-P1P2|ANAPC1_-_112641707.23-P1P2	ANAPC1	261	19	329	79	589	172	699	117	-0.39938793	-0.249609051	-0.231607596	-0.302028637
ANAPC10_+_146019314.23-P1P2|ANAPC10_+_146019317.23-P1P2	ANAPC10	126	6	113	3	453	69	423	21	-0.448025079	-0.535315598	-0.318273255	-0.487407129
ANAPC11_-_79849637.23-P1P2|ANAPC11_+_79849685.23-P1P2	ANAPC11	754	591	833	740	1541	1982	1923	1502	-0.051498133	-0.057619268	-0.032278172	-0.060774081
ANAPC15_+_71823713.23-P1P2|ANAPC15_-_71823727.23-P1P2	ANAPC15	418	352	223	323	1868	2526	1931	1818	-0.040773764	0.014416482	-0.025523296	-0.031405026
ANAPC16_+_73975790.23-P1P2|ANAPC16_-_73975804.23-P1P2	ANAPC16	424	376	472	708	499	916	613	691	-0.033073583	0.019688035	0.015582737	-0.003108087
ANAPC7_-_110841548.23-P1P2|ANAPC7_+_110841268.23-P1P2	ANAPC7	800	660	759	913	1157	1659	1382	1442	-0.043865887	-0.012868388	-0.017636483	-0.015241482
ANG_-_21152854.23-P1P2|ANG_+_21152724.23-P1P2	ANG	1585	1447	1734	1839	2386	2708	2565	2441	-0.028770566	-0.031456979	-0.049130517	-0.02971565
ANGEL1_+_77278971.23-P1P2|ANGEL1_+_77278828.23-P1P2	ANGEL1	850	960	709	1106	2119	3338	2249	2508	0.002979793	0.025509639	-0.004944535	-0.004781578
ANGEL2_+_213188508.23-P1P2|ANGEL2_+_213188808.23-P1P2	ANGEL2	310	320	353	436	1113	973	1255	876	-0.010448632	-0.009006793	-0.084300366	-0.078432089
ANGPT1_+_108510112.23-P1P2|ANGPT1_+_108510118.23-P1P2	ANGPT1	669	745	856	1146	949	1668	1054	1255	0.000871847	0.0029414	0.009787493	0.005513515
ANGPT2_+_6420744.23-P1P2|ANGPT2_+_6420752.23-P1P2	ANGPT2	457	594	606	1029	1518	2703	1769	1975	0.023907823	0.038021076	0.011562142	-0.004602067
ANGPT4_+_896929.23-P1P2|ANGPT4_+_896968.23-P1P2	ANGPT4	732	651	695	757	1305	2289	1289	1645	-0.032663947	-0.027528655	0.009526574	0.016418619
ANGPTL1_+_178840213.23-P1P2|ANGPTL1_-_178840143.23-P1P2	ANGPTL1	686	674	650	1157	934	2080	1043	1494	-0.017806946	0.044991351	0.041680405	0.034568074
ANGPTL2_-_129884872.23-P1P2|ANGPTL2_+_129884905.23-P1P2	ANGPTL2	621	762	703	804	2082	3033	2415	2696	0.015339128	-0.020325498	-0.015485992	-0.00461281
ANGPTL3_-_63063180.23-P1P2|ANGPTL3_+_63063286.23-P1P2	ANGPTL3	146	88	223	285	356	674	295	553	-0.090117123	-0.004023955	0.019692063	0.076690759
ANGPTL4_-_8429281.23-P1P2|ANGPTL4_+_8429075.23-P1P2	ANGPTL4	576	533	575	715	1216	1880	1253	1415	-0.026741623	-0.0079815	-0.00748483	-0.002808137
ANGPTL5_+_101778543.23-P1P2|ANGPTL5_+_101778356.23-P1P2	ANGPTL5	320	213	281	456	542	1176	474	798	-0.075730331	0.031220162	0.038115127	0.059894597
ANGPTL6_-_10213594.23-P1P2|ANGPTL6_-_10213591.23-P1P2	ANGPTL6	517	707	549	819	526	910	664	785	0.031491176	0.018893655	0.007606517	0.004377365
ANGPTL7_+_11249437.23-P1P2|ANGPTL7_-_11249433.23-P1P2	ANGPTL7	348	214	430	438	604	1435	701	977	-0.087524107	-0.037423888	0.050354238	0.030243064
ANHX_+_133812391.23-P1P2|ANHX_+_133812402.23-P1P2	ANHX	770	1105	902	1320	1189	2134	1516	1755	0.038711814	0.016090405	0.012618331	0.001094572
ANK1_-_41655052.23-P1P2|ANK1_-_41655095.23-P1P2	ANK1	840	855	830	804	905	1273	1074	1250	-0.012534938	-0.04484118	-0.020231405	0.001931362
ANK2_-_113970949.23-ENST00000264366.6|ANK2_-_113970921.23-ENST00000264366.6	ANK2	448	556	492	804	881	1594	836	1002	0.017015464	0.032337184	0.013686683	0.006541717
ANK3_+_62149513.23-P1P2|ANK3_+_62149538.23-P1P2	ANK3	307	327	329	503	279	288	363	311	-0.005779196	0.022455686	-0.0619267	-0.046175241
ANKAR_+_190539422.23-P1P2|ANKAR_-_190539475.23-P1P2	ANKAR	592	596	619	671	689	844	671	905	-0.014171187	-0.028237418	-0.038869475	0.025083455
ANKDD1A_-_65204135.23-P1P2|ANKDD1A_-_65204113.23-P1P2	ANKDD1A	778	909	1003	1216	1324	2244	1588	1391	0.008038377	-0.011702902	0.004903246	-0.042747486
ANKDD1B_+_74907371.23-P1P2|ANKDD1B_-_74907546.23-P1P2	ANKDD1B	749	537	814	929	1560	2476	1697	1750	-0.064790571	-0.020631103	-0.003937853	-0.01708745
ANKEF1_+_10015769.23-P1P2|ANKEF1_-_10015901.23-P1P2	ANKEF1	848	913	895	1166	1549	2582	2037	1854	-0.004157649	-0.001081588	0.002665521	-0.036725126
ANKFN1_-_54231022.23-P1P2|ANKFN1_-_54230873.23-P1P2	ANKFN1	589	678	590	652	465	631	543	506	0.00580788	-0.025396041	-0.025108762	-0.033004955
ANKFY1_-_4167096.23-P1P2|ANKFY1_-_4167060.23-P1P2	ANKFY1	730	935	716	746	581	953	678	753	0.02174375	-0.034083514	0.000440351	-0.00543965
ANKH_-_14871820.23-P1P2|ANKH_-_14871737.23-P1P2	ANKH	834	899	1034	1335	303	516	327	501	-0.003979678	-0.002407887	0.005405103	0.04503348
ANKHD1_+_139781466.23-P1P2|ANKHD1_-_139781432.23-P1P2	ANKHD1	1196	1014	1535	1325	1477	2343	1639	1865	-0.039807031	-0.061873736	-0.004012342	-0.001611926
ANKHD1-EIF4EBP3_+_139781466.23-P1P2|ANKHD1-EIF4EBP3_-_139781432.23-P1P2	ANKHD1-EIF4EBP3	1196	1014	1535	1325	1477	2343	1639	1865	-0.039807031	-0.061873736	-0.004012342	-0.001611926
ANKIB1_-_91875700.23-P1P2|ANKIB1_+_91875590.23-P1P2	ANKIB1	362	94	348	139	357	55	437	79	-0.215379154	-0.175162954	-0.316328898	-0.289410415
ANKK1_+_113258562.23-P1P2|ANKK1_+_113258540.23-P1P2	ANKK1	1348	2020	1341	1502	1673	2443	1895	2335	0.045195287	-0.023394455	-0.015169495	0.010910226
ANKLE1_-_17392727.23-P1P2|ANKLE1_+_17392722.23-P1P2	ANKLE1	428	411	381	689	1298	1958	1370	1466	-0.021213852	0.047257531	-0.010798354	-0.011275271
ANKLE2_+_133338375.23-P1P2|ANKLE2_+_133338404.23-P1P2	ANKLE2	704	347	611	260	1283	575	1368	345	-0.120613711	-0.166113941	-0.174276901	-0.238311128
ANKMY1_+_241497155.23-P1P2|ANKMY1_+_241497400.23-P1P2	ANKMY1	605	770	642	971	1106	2209	1491	1765	0.020788879	0.020937229	0.027021756	0.00460232
ANKMY2_+_16685345.23-P1P2|ANKMY2_-_16685324.23-P1P2	ANKMY2	667	819	805	651	1497	2301	2022	1924	0.015443407	-0.07148546	-0.008262444	-0.029735268
ANKRA2_-_72861421.23-P1P2|ANKRA2_+_72861375.23-P1P2	ANKRA2	291	44	249	37	544	904	638	492	-0.294468319	-0.318611372	0.002187215	-0.062733132
ANKRD1_+_92680828.23-P1P2|ANKRD1_+_92680850.23-P1P2	ANKRD1	141	207	118	260	33	78	51	66	0.041832309	0.075952665	0.047482201	0.017951465
ANKRD10_+_111567378.23-P1P2|ANKRD10_-_111567334.23-P1P2	ANKRD10	830	826	865	1064	1803	2865	2487	2679	-0.015895822	-0.009567184	-0.003777485	-0.010227701
ANKRD11_+_89556932.23-P1P2|ANKRD11_-_89556765.23-P1P2	ANKRD11	1085	1959	998	2090	2582	5223	2742	3927	0.073005906	0.069041625	0.028770925	0.034569877
ANKRD12_-_9136808.23-P1P2|ANKRD12_+_9137050.23-P1P2	ANKRD12	1102	1178	1169	1237	1688	2732	2257	2413	-0.005223765	-0.031791745	-0.001303012	-0.011412688
ANKRD13A_+_110437230.23-P1P2|ANKRD13A_-_110437263.23-P1P2	ANKRD13A	290	419	228	411	916	1318	1057	1225	0.039625018	0.04667075	-0.017178265	0.001263339
ANKRD13B_+_27920377.23-P1P2|ANKRD13B_+_27920172.23-P1P2	ANKRD13B	757	762	729	890	2718	4229	3099	3693	-0.014193301	-0.010682505	-0.006605313	0.0056577
ANKRD13C_+_70820351.23-P1P2|ANKRD13C_-_70820382.23-P1P2	ANKRD13C	114	120	88	139	1438	2224	1635	1868	-0.007579639	0.026819607	-0.00743174	-0.000974996
ANKRD13D_+_67056813.23-P1P2|ANKRD13D_-_67056373.23-P1P2	ANKRD13D	972	793	1219	874	1983	3384	2444	2951	-0.045537608	-0.089274226	0.005839762	0.007723415
ANKRD16_+_5931865.23-P1P2|ANKRD16_+_5931814.23-P1P2	ANKRD16	884	1424	871	1544	1992	3824	2739	3492	0.05596481	0.044407436	0.021706512	0.016276577
ANKRD17_+_74124315.23-P1P2|ANKRD17_+_74124528.23-P1P2	ANKRD17	370	30	323	62	1570	752	1976	680	-0.385887325	-0.282209047	-0.165347642	-0.189598768
ANKRD18A_-_38577100.23-ENST00000564591.1,ENST00000566717.2|ANKRD18A_+_38576705.23-ENST00000564591.1,ENST00000566717.2	ANKRD18A	205	170	305	435	444	753	580	657	-0.04298556	0.012193265	0.00490662	-0.002342979
ANKRD18B_-_33524277.23-P1P2|ANKRD18B_-_33524270.23-P1P2	ANKRD18B	472	572	678	631	1148	1825	1420	1439	0.013468163	-0.050745618	-0.003733681	-0.0198334
ANKRD2_-_99332575.23-P1P2|ANKRD2_-_99332572.23-P1P2	ANKRD2	610	572	693	711	1775	2576	2102	2298	-0.024764983	-0.036357443	-0.015999757	-0.007903699
ANKRD22_-_90611584.23-P1P2|ANKRD22_+_90611514.23-P1P2	ANKRD22	314	501	273	403	402	726	518	588	0.054424745	0.01725299	0.013356745	-0.002017605
ANKRD23_-_97523606.23-P1|ANKRD23_+_97523642.23-P1	ANKRD23	779	1103	825	1114	1325	2085	1597	1759	0.036708245	0.004204898	-0.005102801	-0.006731354
ANKRD23_+_97509682.23-P2|ANKRD23_-_97509672.23-P2	ANKRD23	343	407	350	525	906	1539	1077	1110	0.010307256	0.019651798	0.005186686	-0.01717916
ANKRD24_+_4198441.23-P1P2|ANKRD24_+_4198444.23-P1P2	ANKRD24	689	832	750	986	1435	2408	1849	2255	0.012953171	0.000250713	0.003562644	0.009291959
ANKRD26_-_27389221.23-P1P2|ANKRD26_+_27389387.23-P1P2	ANKRD26	588	764	533	572	1255	2198	1673	1759	0.023871596	-0.02972283	0.00932269	-0.014041291
ANKRD27_+_33166026.23-P1P2|ANKRD27_+_33166056.23-P1P2	ANKRD27	953	1283	887	1257	2108	2841	2360	2637	0.02919167	0.01134325	-0.025972981	-0.004469794
ANKRD28_-_15839402.23-P1P2|ANKRD28_+_15839382.23-P1P2	ANKRD28	96	140	120	75	720	1391	873	1014	0.040687993	-0.108885855	0.022507448	0.001607416
ANKRD29_-_21242795.23-P1P2|ANKRD29_+_21242843.23-P1P2	ANKRD29	875	1184	1058	1377	1038	1532	1188	1267	0.02994739	-0.001220996	-0.013747319	-0.011802454
ANKRD30A_+_37414734.23-P1P2|ANKRD30A_+_37414731.23-P1P2	ANKRD30A	1354	1766	1280	1568	1263	2049	1449	1492	0.024473778	-0.010165506	-0.000993543	-0.01732533
ANKRD30B_+_14748218.23-P1P2|ANKRD30B_-_14748199.23-P1P2	ANKRD30B	430	368	642	890	690	1157	791	960	-0.038370554	0.008075459	0.003422363	0.008506157
ANKRD31_-_74532673.23-P1P2|ANKRD31_-_74532663.23-P1P2	ANKRD31	1120	928	1356	1196	2032	1647	2349	1498	-0.043232741	-0.058687273	-0.094500218	-0.092660296
ANKRD32_+_93954429.23-P1P2|ANKRD32_+_93954438.23-P1P2	ANKRD32	688	455	692	608	1052	849	1213	665	-0.07681808	-0.059242146	-0.095068135	-0.116380466
ANKRD33_+_52282089.23-P1P2|ANKRD33_+_52282132.23-P1P2	ANKRD33	462	488	524	907	848	1682	1020	1247	-0.007015551	0.040838592	0.026069193	0.009661999
ANKRD33B_+_10564429.23-P1P2|ANKRD33B_+_10564449.23-P1P2	ANKRD33B	715	983	725	835	1354	2089	1941	2023	0.032309134	-0.019288609	-0.00776152	-0.015416407
ANKRD34A_-_145472547.23-P1|ANKRD34A_+_145472473.23-P1	ANKRD34A	820	973	702	844	873	961	998	1172	0.010346486	-0.012947087	-0.053257453	0.003338265
ANKRD34A_-_145470559.23-P2|ANKRD34A_-_145470579.23-P2	ANKRD34A	878	979	886	1297	1317	2245	1673	2099	0.001068953	0.016136696	0.005677495	0.013746484
ANKRD34B_+_79866043.23-P1|ANKRD34B_-_79866050.23-P1	ANKRD34B	426	682	502	662	1573	2777	1764	2041	0.054974846	0.000682403	0.010406794	0.001012011
ANKRD34B_-_79864939.23-P2|ANKRD34B_-_79864923.23-P2	ANKRD34B	654	588	718	1021	473	1021	611	739	-0.031037243	0.011838248	0.037399801	0.007956279
ANKRD34C_+_79575155.23-P1P2|ANKRD34C_-_79575161.23-P1P2	ANKRD34C	888	1236	1138	1123	489	530	532	370	0.03416125	-0.042102042	-0.05535778	-0.078925941
ANKRD35_-_145562333.23-P1P2|ANKRD35_-_145562352.23-P1P2	ANKRD35	717	825	660	747	1496	2778	1637	1885	0.005752116	-0.021864982	0.017218061	0.000257337
ANKRD36_+_97779467.23-P1P2|ANKRD36_-_97779499.23-P1P2	ANKRD36	263	248	293	417	820	1387	964	1174	-0.023911458	0.011874648	0.004607017	0.009054021
ANKRD36C_-_96657460.23-P1P2|ANKRD36C_-_96657464.23-P1P2	ANKRD36C	612	652	598	715	430	982	481	807	-0.005734636	-0.013769122	0.044976186	0.059355246
ANKRD37_-_186317926.23-P1P2|ANKRD37_+_186317774.23-P1P2	ANKRD37	672	856	699	946	1074	1586	1334	1827	0.020920932	0.004530664	-0.013672233	0.027523641
ANKRD39_-_97523708.23-P1P2|ANKRD39_-_97523728.23-P1P2	ANKRD39	927	1027	907	1260	1847	2928	2227	2231	0.000108805	0.008403059	-0.004094852	-0.021640866
ANKRD40_+_48785164.23-P1P2|ANKRD40_+_48785242.23-P1P2	ANKRD40	1275	1483	1311	1937	1595	2626	1894	2183	0.007377874	0.017521581	0.000999738	0.000407903
ANKRD42_-_82904842.23-P1P2|ANKRD42_+_82905009.23-P1P2	ANKRD42	763	840	859	1001	825	1574	994	1223	-0.0008343	-0.017552897	0.020829886	0.010665277
ANKRD44_-_198062864.23-ENST00000328737.2|ANKRD44_-_198062882.23-ENST00000328737.2	ANKRD44	676	606	641	971	723	1706	815	972	-0.031475343	0.021167295	0.049452626	0.005761845
ANKRD44_+_198051801.23-ENST00000450567.1|ANKRD44_-_198051829.23-ENST00000450567.1	ANKRD44	58	47	91	104	462	915	604	589	-0.045990999	-0.02060519	0.025801593	-0.025872925
ANKRD45_+_173638942.23-P1P2|ANKRD45_+_173638762.23-P1P2	ANKRD45	792	877	864	960	1006	1648	1130	1339	3.18E-05	-0.024585443	0.000305547	0.004754584
ANKRD46_-_101571968.23-P1P2|ANKRD46_-_101571982.23-P1P2	ANKRD46	904	956	837	1130	1514	2659	1961	2129	-0.006831404	0.004178951	0.009705616	-0.008997399
ANKRD49_-_94226994.23-P1P2|ANKRD49_-_94227181.23-P1P2	ANKRD49	1063	631	1162	677	301	372	437	250	-0.092970413	-0.119906162	-0.037722549	-0.10951778
ANKRD50_+_125633644.23-P1P2|ANKRD50_+_125633864.23-P1P2	ANKRD50	273	342	422	641	360	772	391	514	0.018368549	0.021529243	0.036468338	0.021012458
ANKRD52_+_56652106.23-P1P2|ANKRD52_-_56652120.23-P1P2	ANKRD52	621	598	620	712	1460	2064	1689	1979	-0.020802389	-0.019721456	-0.01953951	0.002992655
ANKRD53_-_71205788.23-P1P2|ANKRD53_+_71206088.23-P1P2	ANKRD53	807	962	874	904	1513	2522	1888	2136	0.011033955	-0.035159369	0.002665107	-0.002515849
ANKRD54_+_38240313.23-P1P2|ANKRD54_+_38240316.23-P1P2	ANKRD54	969	839	906	1076	1446	2325	1749	1964	-0.036665416	-0.014748609	-0.002193662	-0.003692491
ANKRD55_-_55529169.23-ENST00000341048.4|ANKRD55_+_55529195.23-ENST00000341048.4	ANKRD55	376	476	389	544	737	1065	722	858	0.01996193	0.009322939	-0.016611555	0.005193887
ANKRD6_-_90142922.23-P1P2|ANKRD6_-_90142974.23-P1P2	ANKRD6	966	1442	1057	1488	1010	1354	1128	1235	0.044605694	0.010370277	-0.026705468	-0.007677348
ANKRD60_+_56803320.23-ENST00000457363.1|ANKRD60_+_56803339.23-ENST00000457363.1	ANKRD60	528	526	736	837	1342	2183	1661	2204	-0.015740917	-0.021158258	-0.000630356	0.022554388
ANKRD61_-_6071023.23-P1P2|ANKRD61_+_6071171.23-P1P2	ANKRD61	477	501	515	630	275	431	289	535	-0.007858773	-0.01040177	-0.005784609	0.074715983
ANKRD62_-_12094120.23-P1P2|ANKRD62_-_12094092.23-P1P2	ANKRD62	564	531	584	955	1115	1999	1201	1316	-0.024163263	0.032457354	0.012467721	-0.007548101
ANKRD63_+_40575241.23-P1P2|ANKRD63_-_40575214.23-P1P2	ANKRD63	683	617	615	750	1678	2142	2051	2123	-0.030329398	-0.010851195	-0.033292405	-0.016497438
ANKRD65_-_1356630.23-P1|ANKRD65_+_1356462.23-P1	ANKRD65	493	627	701	806	1072	1388	1084	1273	0.020668843	-0.019538174	-0.031388956	0.003340861
ANKRD65_+_1355480.23-P2|ANKRD65_-_1355292.23-P2	ANKRD65	1117	1901	1419	2195	1875	3047	2378	2660	0.064182667	0.024302962	-0.00075283	-0.004298942
ANKRD66_-_46714675.23-P1P2|ANKRD66_-_46714684.23-P1P2	ANKRD66	400	458	383	585	405	773	399	528	0.00499994	0.022336489	0.020803316	0.022053782
ANKRD7_+_117864793.23-P1|ANKRD7_-_117864809.23-P1	ANKRD7	202	243	170	184	503	578	656	623	0.01229906	-0.028510376	-0.047487733	-0.030030739
ANKRD7_-_117854724.23-P2|ANKRD7_-_117854746.23-P2	ANKRD7	932	1012	884	1101	1324	2049	1658	1856	-0.002888955	-0.007726983	-0.0073483	-0.004184799
ANKRD9_-_102976042.23-P1P2|ANKRD9_+_102976027.23-P1P2	ANKRD9	354	323	341	372	2085	3363	2698	2286	-0.028821709	-0.027316692	-0.001758861	-0.047982895
ANKS1A_+_34857078.23-P1P2|ANKS1A_+_34857121.23-P1P2	ANKS1A	756	859	700	943	614	1028	701	802	0.003876901	0.003850635	0.003208066	-0.000774872
ANKS1B_+_100378180.23-ENST00000329257.7,ENST00000547776.2|ANKS1B_+_100377870.23-ENST00000329257.7,ENST00000547776.2	ANKS1B	408	393	465	791	912	1568	1283	1428	-0.020755457	0.038256174	0.006813106	-0.005089839
ANKS3_+_4784206.23-P1P2|ANKS3_+_4784180.23-P1P2	ANKS3	717	850	574	751	1361	2139	1591	1665	0.010205258	-0.000473311	-0.005268623	-0.01477497
ANKS4B_+_21245002.23-P1P2|ANKS4B_-_21245045.23-P1P2	ANKS4B	834	795	871	1132	957	1738	891	1191	-0.022318868	-0.00143877	0.01419645	0.023689649
ANKS6_+_101558828.23-P1P2|ANKS6_+_101558759.23-P1P2	ANKS6	1051	1346	1148	1573	1996	3518	2462	2648	0.021741475	0.006379767	0.010193722	-0.010469283
ANKUB1_-_149510608.23-ENST00000446160.1|ANKUB1_-_149510259.23-ENST00000446160.1	ANKUB1	513	399	614	814	878	1446	945	1104	-0.052625348	0.001477811	0.001016027	0.002519056
ANKZF1_+_220094599.23-P1P2|ANKZF1_+_220094583.23-P1P2	ANKZF1	833	914	823	1050	1236	2100	1498	1696	-0.001332105	-0.004174569	0.005231056	-0.002404401
ANLN_-_36429483.23-P1P2|ANLN_-_36429499.23-P1P2	ANLN	1597	922	1743	1068	2213	1614	2719	1238	-0.097148794	-0.112492664	-0.108727048	-0.145634133
ANO1_-_69924499.23-P1P2|ANO1_-_69924717.23-P1P2	ANO1	1155	1294	1043	1138	1861	2809	2508	2715	0.001782423	-0.027268871	-0.010704794	-0.009450766
ANO10_-_43663459.23-P1P2|ANO10_-_43663456.23-P1P2	ANO10	613	636	526	785	1884	3517	2450	2809	-0.009683	0.018948374	0.017937626	-0.0004182
ANO2_-_6054389.23-P1P2|ANO2_+_6054306.23-P1P2	ANO2	1138	1485	1151	1342	1508	2351	1815	1790	0.024541809	-0.017466356	-0.006351692	-0.02410397
ANO3_+_26353776.23-P1P2|ANO3_-_26353758.23-P1P2	ANO3	823	831	756	1003	1156	1697	1256	1245	-0.013732226	0.001598755	-0.014468296	-0.023305902
ANO4_+_101188701.23-P1P2|ANO4_+_101188698.23-P1P2	ANO4	952	1281	1031	1162	889	1582	980	978	0.029115491	-0.022477673	0.011450996	-0.022244145
ANO5_-_22214662.23-P1P2|ANO5_-_22214643.23-P1P2	ANO5	450	262	551	513	930	1072	1152	659	-0.0957202	-0.050685464	-0.047052463	-0.10969347
ANO6_-_45609917.23-P1P2|ANO6_-_45609946.23-P1P2	ANO6	1235	1780	1637	2130	1310	2365	1711	1900	0.039380567	-0.001249486	0.013413461	-0.00544806
ANO7_+_242157675.23-P1P2|ANO7_+_242157714.23-P1P2	ANO7	378	275	474	513	1208	1050	1427	945	-0.062538517	-0.028478419	-0.085075695	-0.086708662
ANO8_-_17445502.23-P1P2|ANO8_-_17445543.23-P1P2	ANO8	890	1436	997	1256	1048	1503	1353	1620	0.056208098	-0.006036608	-0.017613876	0.006392782
ANO9_+_441993.23-P1P2|ANO9_+_441978.23-P1P2	ANO9	1098	1290	1148	1441	1688	2733	1896	2171	0.008872165	-0.006567403	-0.001253686	-0.000624876
ANP32A_-_69112836.23-P1P2|ANP32A_-_69113252.23-P1P2	ANP32A	668	777	827	953	861	1218	1060	1526	0.007367645	-0.01920407	-0.019469159	0.035358873
ANP32B_+_100745631.23-P1P2|ANP32B_-_100745885.23-P1P2	ANP32B	768	907	852	837	1140	1813	1384	1342	0.009639358	-0.04276493	-0.003680626	-0.026767853
ANP32D_-_48866393.23-P1P2|ANP32D_-_48866604.23-P1P2	ANP32D	230	39	328	446	1565	2492	1964	1899	-0.277061433	0.00516363	-0.003500905	-0.027215314
ANP32E_+_150208436.23-P1P2|ANP32E_-_150208476.23-P1P2	ANP32E	399	476	547	799	562	971	653	737	0.011117678	0.015782161	0.007435798	-0.002912144
ANPEP_+_90358037.23-P1|ANPEP_-_90358028.23-P1	ANPEP	1471	2275	1430	1908	1723	3166	2084	2165	0.049909978	0.002459346	0.01580362	-0.015926791
ANPEP_-_90349821.23-P2|ANPEP_-_90349839.23-P2	ANPEP	643	945	796	913	582	913	609	663	0.042255383	-0.019895059	-0.005566362	-0.00857803
ANTXR1_+_69240562.23-P1P2|ANTXR1_+_69240935.23-P1P2	ANTXR1	470	658	494	667	1193	1941	1306	1154	0.034985394	0.004162844	-0.000609158	-0.041374136
ANTXR2_-_80994347.23-P1P2|ANTXR2_+_80994354.23-P1P2	ANTXR2	421	605	465	769	887	1657	1154	1163	0.038869803	0.034092036	0.017995707	-0.02070189
ANXA1_-_75766840.23-P1P2|ANXA1_+_75766778.23-P1P2	ANXA1	593	555	540	874	583	1107	589	753	-0.025048711	0.030928709	0.02015507	0.016664671
ANXA10_+_169013714.23-P1P2|ANXA10_-_169013780.23-P1P2	ANXA10	206	120	300	534	481	658	390	516	-0.095363998	0.044875531	-0.02401991	0.022024115
ANXA11_-_81965250.23-P1P2|ANXA11_-_81965296.23-P1P2	ANXA11	737	1133	886	960	1230	2151	1452	1943	0.048978822	-0.02829794	0.009120463	0.023877751
ANXA13_+_124749624.23-P1P2|ANXA13_+_124749651.23-P1P2	ANXA13	327	331	426	523	788	1479	894	977	-0.013364914	-0.009883143	0.018620711	-0.007970311
ANXA2_-_60690116.23-P1P2|ANXA2_-_60690106.23-P1P2	ANXA2	637	739	504	585	1394	2389	1555	1611	0.006974777	-0.018152965	0.006400667	-0.016360398
ANXA2R_-_43040242.23-P1P2|ANXA2R_-_43040188.23-P1P2	ANXA2R	379	396	415	580	1075	1804	1038	1298	-0.008639017	0.009238157	0.003557234	0.013213876
ANXA3_+_79472940.23-P1P2|ANXA3_-_79472946.23-P1P2	ANXA3	579	723	733	1113	1862	2857	2061	2163	0.017944544	0.021527361	-0.008493469	-0.014326976
ANXA4_-_69969324.23-P1P2|ANXA4_+_69969241.23-P1P2	ANXA4	370	54	242	90	985	1728	1047	1565	-0.300259644	-0.185328697	0.009534576	0.04126619
ANXA5_-_122618118.23-P1P2|ANXA5_-_122618086.23-P1P2	ANXA5	871	1119	920	1101	874	1313	876	1124	0.02220561	-0.013620805	-0.011368972	0.017256458
ANXA6_-_150537278.23-P1P2|ANXA6_+_150537317.23-P1P2	ANXA6	882	1149	815	1050	1235	2568	1458	1635	0.024281162	-0.002732439	0.032455121	-0.003908579
ANXA7_+_75173793.23-P1P2|ANXA7_-_75173729.23-P1P2	ANXA7	184	92	168	58	1015	456	1176	287	-0.117889767	-0.195699447	-0.173915205	-0.243403287
ANXA8_-_48255419.23-P1P2|ANXA8_-_48255402.23-P1P2	ANXA8	525	475	493	430	1483	2224	1929	1650	-0.030092518	-0.060308749	-0.011583562	-0.046488033
ANXA8L1_-_47173947.23-ENST00000359178.4|ANXA8L1_+_47173943.23-ENST00000359178.4	ANXA8L1	690	554	634	906	1074	1680	1203	1246	-0.047907913	0.012556941	-0.005913579	-0.016402232
ANXA9_-_150954803.23-P1P2|ANXA9_+_150954830.23-P1P2	ANXA9	891	1376	759	1212	776	1115	1033	1385	0.049670854	0.028967009	-0.017374564	0.024171923
AOAH_-_36764004.23-P1P2|AOAH_-_36764000.23-P1P2	AOAH	693	785	656	966	1038	2103	1478	1615	0.003416268	0.016991014	0.028942121	-0.007985757
AOC1_-_150549631.23-P1|AOC1_-_150549683.23-P1	AOC1	698	667	791	1021	831	1603	1009	1141	-0.021949985	-0.002455672	0.022314051	-0.002598384
AOC1_-_150553650.23-P2|AOC1_+_150553853.23-P2	AOC1	448	461	575	554	926	1572	1169	1574	-0.010912535	-0.045632301	0.005104586	0.024842831
AOC2_+_40996638.23-P1P2|AOC2_+_40996660.23-P1P2	AOC2	494	505	488	677	1042	1747	708	1446	-0.011892716	0.008161946	0.003430623	0.090313288
AOC3_+_41003290.23-P1P2|AOC3_-_41003258.23-P1P2	AOC3	536	710	511	876	726	1209	780	969	0.026742751	0.039410124	0.002497329	0.012173136
AOX1_+_201450796.23-P1|AOX1_-_201450834.23-P1	AOX1	164	115	176	102	551	278	411	125	-0.067798521	-0.120173693	-0.158192664	-0.208315719
AOX1_+_201474091.23-P2|AOX1_+_201474232.23-P2	AOX1			37	74	592	1245	811	899		0.060358705	0.033919785	-0.005734925
AP1AR_-_113152975.23-P1P2|AP1AR_-_113152987.23-P1P2	AP1AR	1044	1054	940	1253	1281	1934	1496	1400	-0.013752841	0.00230333	-0.010684211	-0.032350251
AP1B1_+_29784481.23-P1P2|AP1B1_+_29784492.23-P1P2	AP1B1	1145	1703	1300	1558	1584	2548	1918	2156	0.044070993	-0.013400641	-0.002131759	-0.003529234
AP1G1_-_71842702.23-P1P2|AP1G1_-_71842491.23-P1P2	AP1G1	897	833	973	1408	530	721	715	743	-0.026217449	0.014435217	-0.024763681	-0.015887841
AP1G2_+_24036742.23-P1P2|AP1G2_+_24036800.23-P1P2	AP1G2	1089	1208	981	1029	1046	1844	1187	1427	0.000299546	-0.033088198	0.010196357	0.007025802
AP1M1_-_16308731.23-P1P2|AP1M1_+_16308778.23-P1P2	AP1M1	756	724	791	665	632	1007	738	1200	-0.021625756	-0.065754966	-0.003461694	0.054477137
AP1M2_-_10697754.23-P1P2|AP1M2_-_10697911.23-P1P2	AP1M2	697	702	989	953	861	1484	1174	1184	-0.014109197	-0.045617774	0.007144374	-0.020589775
AP1S1_-_100797802.23-P1P2|AP1S1_-_100797757.23-P1P2	AP1S1	638	861	697	903	1429	2487	1625	2170	0.029532033	-0.001915418	0.008477849	0.023554845
AP1S2_-_15872939.23-P1P2|AP1S2_-_15872932.23-P1P2	AP1S2	660	850	744	1322	1085	2317	1414	1508	0.02255863	0.04474493	0.036037206	-0.01180412
AP1S3_-_224702252.23-P1P2|AP1S3_-_224702284.23-P1P2	AP1S3	991	1061	1193	1387	1882	2787	2162	2655	-0.004991797	-0.017887857	-0.01327671	0.010380256
AP2A1_-_50270622.23-P1P2|AP2A1_+_50270300.23-P1P2	AP2A1	393	37	392	130	1106	347	1237	231	-0.364463437	-0.202536139	-0.222220034	-0.285370681
AP2A2_-_925877.23-P1P2|AP2A2_+_925897.23-P1P2	AP2A2	918	1084	838	886	1822	2786	2223	1947	0.009623787	-0.031918742	-0.008958871	-0.042769645
AP2B1_-_33914544.23-P1P2|AP2B1_-_33914522.23-P1P2	AP2B1	499	529	575	596	1230	1982	1264	1444	-0.006472902	-0.03484919	-0.001906957	-0.000992631
AP2S1_-_47354086.23-P1P2|AP2S1_-_47354062.23-P1P2	AP2S1	368	20	374	13	1023	120	1367	129	-0.443245557	-0.526145705	-0.354149077	-0.392204933
AP3B1_-_77590427.23-P1P2|AP3B1_+_77590520.23-P1P2	AP3B1	881	814	954	735	2525	4209	2794	2821	-0.026974233	-0.078646023	0.002682919	-0.02041056
AP3B2_-_83378565.23-P1P2|AP3B2_+_83378423.23-P1P2	AP3B2	576	566	621	805	1974	2589	2115	2278	-0.01778624	-0.001836574	-0.02964102	-0.0102479
AP3D1_-_2151147.23-P1P2|AP3D1_-_2151563.23-P1P2	AP3D1	601	176	709	190	704	132	723	100	-0.197992404	-0.234225062	-0.291070595	-0.331806864
AP3M1_+_75910607.23-P1P2|AP3M1_+_75910525.23-P1P2	AP3M1	404	402	481	591	294	483	380	378	-0.015914551	-0.009756782	0.000563901	-0.022751111
AP3M2_-_42010600.23-P1P2|AP3M2_-_42010635.23-P1P2	AP3M2	667	312	667	542	1378	2530	1654	2101	-0.128393162	-0.070767021	0.015684738	0.015692139
AP3S1_+_115177971.23-P1P2|AP3S1_-_115177670.23-P1P2	AP3S1	720	843	825	1030	2375	3867	3112	3327	0.00834899	-0.007372907	-0.000486486	-0.011415996
AP3S2_+_90437190.23-P1P2|AP3S2_+_90437186.23-P1P2	AP3S2	1006	1616	1166	1486	3378	5232	4122	4780	0.055555228	-0.004322759	-0.007216491	0.001372236
AP4B1_-_114447335.23-P1P2|AP4B1_+_114447589.23-P1P2	AP4B1	495	460	470	574	575	832	625	762	-0.026104127	-0.01065116	-0.016449596	0.009213289
AP4E1_-_51200948.23-P1P2|AP4E1_-_51200945.23-P1P2	AP4E1	557	702	653	811	2373	3673	2489	3031	0.019323713	-0.008155853	-0.007310903	0.009061011
AP4M1_+_99699365.23-P1P2|AP4M1_+_99699307.23-P1P2	AP4M1	222	48	199	77	1357	2201	1447	1163	-0.241488877	-0.179328298	-0.001021249	-0.056271001
AP4S1_+_31494875.23-P1P2|AP4S1_-_31495105.23-P1P2	AP4S1	488	694	464	565	1193	1786	1404	1602	0.037327745	-0.011088	-0.011824445	-0.001181052
AP5B1_+_65548161.23-P1P2|AP5B1_+_65548202.23-P1P2	AP5B1	573	680	763	829					0.010353164	-0.027894623
AP5M1_-_57735937.23-P1P2|AP5M1_-_57735787.23-P1P2	AP5M1	1021	1246	910	1369	1830	2957	2061	2215	0.014541798	0.02017036	-0.001520383	-0.010591166
AP5S1_-_3801224.23-P1P2|AP5S1_+_3801197.23-P1P2	AP5S1	87	206	70	170	764	1155	1007	1178	0.112573793	0.089786391	-0.010527908	0.002729939
AP5Z1_-_4815293.23-P1P2|AP5Z1_-_4815338.23-P1P2	AP5Z1	1278	1533	1191	1481	1406	1939	1590	1943	0.011976162	-0.007953792	-0.022880751	0.009603037
APAF1_-_99039085.23-P1P2|APAF1_+_99039058.23-P1P2	APAF1	150	166	165	201	1060	1855	1264	1529	-0.000133845	-0.011128911	0.009206888	0.007999971
APBA1_+_72287177.23-P1P2|APBA1_+_72287235.23-P1P2	APBA1	953	425	714	288	1508	1003	2013	608	-0.135582643	-0.174043439	-0.121130084	-0.210096411
APBA2_+_29131551.23-P1P2|APBA2_-_29131600.23-P1P2	APBA2	670	759	647	918	1822	2874	2284	2526	0.003425896	0.011504183	-0.00476738	-0.006085391
APBA3_+_3761594.23-P1P2|APBA3_+_3761583.23-P1P2	APBA3	1081	1686	1006	1395	1695	2856	2094	2373	0.051156002	0.008139861	0.004122104	-0.002253527
APBB1_-_6440248.23-P1P2|APBB1_-_6440251.23-P1P2	APBB1	936	1312	946	1021	1506	2578	1675	2163	0.035212574	-0.028876163	0.006249906	0.018281768
APBB1IP_+_26727301.23-P1P2|APBB1IP_+_26727562.23-P1P2	APBB1IP	997	1115	1087	1451	916	1688	1028	1314	0.001514784	0.002517692	0.016160498	0.016661426
APBB2_+_41216527.23-P1P2|APBB2_+_41216456.23-P1P2	APBB2	74	640	647	798	1197	1736	1344	1924	0.305255627	-0.009179152	-0.01610173	0.034483941
APBB3_+_139943875.23-P1P2|APBB3_-_139943965.23-P1P2	APBB3	401	567	539	770	734	1322	920	974	0.036449579	0.012498077	0.013059677	-0.012958939
APC_-_112073585.23-P1|APC_-_112073620.23-P1	APC	850	857	905	1129	1379	2056	1752	1754	-0.013951758	-0.007484672	-0.012372414	-0.021743675
APC_-_112043247.23-P2|APC_-_112043228.23-P2	APC	749	869	702	964	1229	1789	1216	1408	0.006990922	0.006681766	-0.015603466	0.00112409
APC2_-_1450147.23-P1|APC2_+_1450166.23-P1	APC2	763	898	778	800	855	1289	930	1085	0.009125878	-0.036025748	-0.010894392	0.002304961
APC2_-_1446291.23-P2|APC2_-_1446345.23-P2	APC2	1156	1325	1123	1479	1733	1913	1858	1696	0.005186275	0.000529193	-0.052875834	-0.036267693
APCDD1_-_10454694.23-P1P2|APCDD1_+_10454664.23-P1P2	APCDD1	67	111	129	105	1074	1760	1407	1265	0.059347783	-0.070311227	0.00035513	-0.038648252
APCDD1L_+_57090390.23-P1P2|APCDD1L_+_57090384.23-P1P2	APCDD1L	722	826	828	1002	905	1733	1253	1478	0.004896396	-0.011978752	0.021332952	0.004040367
APCS_+_159557645.23-P1P2|APCS_+_159557663.23-P1P2	APCS	536	653	669	846	1014	1614	1274	1484	0.014262531	-0.005490712	-0.00357046	0.002064465
APEH_-_49711852.23-P1P2|APEH_+_49711858.23-P1P2	APEH	623	794	841	1139	706	1352	796	948	0.02099548	0.004646667	0.021319753	0.00553913
APEX1_-_20923425.23-P1P2|APEX1_+_20923418.23-P1P2	APEX1	779	810	718	1135	1640	2673	2087	2175	-0.009354525	0.027470178	-0.00035833	-0.01542832
APEX2_+_55026814.23-P1P2|APEX2_+_55026846.23-P1P2	APEX2	262	171	260	214	1469	1704	1628	1497	-0.07859697	-0.068801574	-0.046196521	-0.035112706
APH1A_-_150241316.23-P1P2|APH1A_-_150241347.23-P1P2	APH1A	706	989	762	687	1212	1554	1573	1873	0.035106192	-0.055436958	-0.032703115	0.005523541
APH1B_-_63569831.23-P1P2|APH1B_+_63569877.23-P1P2	APH1B	331	345	374	547	1551	3155	1806	2024	-0.009006594	0.015931873	0.029505635	-0.004003177
API5_-_43333619.23-P1P2|API5_-_43333590.23-P1P2	API5	303	187	343	326	1000	1192	1146	809	-0.086949395	-0.047634032	-0.042533298	-0.076652793
APIP_-_34938012.23-P1P2|APIP_-_34937854.23-P1P2	APIP	1142	1652	1036	1311	1172	1803	1552	1531	0.039924309	-0.005372786	-0.00815533	-0.024065002
APITD1_-_10490853.23-P1P2|APITD1_-_10490864.23-P1P2	APITD1	1049	1132	1175	1443	1701	2616	1909	2243	-0.00381304	-0.009795854	-0.008184623	0.003431352
APITD1-CORT_-_10490853.23-P1P2|APITD1-CORT_-_10490864.23-P1P2	APITD1-CORT	1049	1132	1175	1443	1701	2616	1909	2243	-0.00381304	-0.009795854	-0.008184623	0.003431352
APLF_-_68694726.23-P1P2|APLF_+_68694742.23-P1P2	APLF	697	508	655	1027	1678	3224	1978	2327	-0.06233477	0.026258435	0.021816689	0.003629761
APLN_+_128788911.23-P1P2|APLN_+_128788902.23-P1P2	APLN	773	805	687	872	784	1294	934	902	-0.009124868	-0.00494028	0.001301793	-0.027401845
APLNR_+_57004653.23-P1P2|APLNR_+_57004672.23-P1P2	APLNR	266	270	335	513	759	1081	829	889	-0.012954388	0.022696405	-0.018563475	-0.010942261
APLP1_-_36359530.23-P1P2|APLP1_-_36359489.23-P1P2	APLP1	731	830	830	1312	937	1749	1087	1288	0.003769392	0.027475032	0.017891284	0.004748001
APLP2_-_129939875.23-P1P2|APLP2_-_129939865.23-P1P2	APLP2	670	809	643	976	1420	2265	1783	1876	0.012941682	0.021465948	-0.003272622	-0.01392819
APMAP_+_24973306.23-P1P2|APMAP_+_24973353.23-P1P2	APMAP	747	855	709	1156	1216	1920	1410	1396	0.004966877	0.032039725	-0.004647664	-0.023491876
APOA1_-_116708302.23-P1P2|APOA1_-_116708285.23-P1P2	APOA1	704	761	671	900	1029	1597	1371	1341	-0.003563639	0.003204473	-0.00697526	-0.025401346
APOA1BP_-_156561604.23-P1P2|APOA1BP_-_156561782.23-P1P2	APOA1BP	496	671	591	670	465	908	561	637	0.029878145	-0.021626499	0.023896447	-0.001968184
APOA2_+_161193373.23-P1P2|APOA2_+_161193370.23-P1P2	APOA2	478	552	547	748	627	1042	669	832	0.00627964	0.006045042	0.002209751	0.012335972
APOA4_+_116693985.23-P1P2|APOA4_+_116693941.23-P1P2	APOA4	988	1001	1080	1088	1126	2130	1095	1153	-0.013224888	-0.03905254	0.019699507	-0.013810154
APOA5_+_116662572.23-P1P2|APOA5_+_116662545.23-P1P2	APOA5	434	530	438	737	491	886	500	676	0.014607035	0.036640334	0.013272657	0.025442824
APOB_-_21266915.23-P1P2|APOB_-_21266941.23-P1P2	APOB	926	1484	1025	1084	1494	2352	1623	1476	0.055199709	-0.031877654	-0.005037619	-0.036850201
APOBEC1_+_7818434.23-P1P2|APOBEC1_+_7818491.23-P1P2	APOBEC1	473	487	452	661	1080	2010	1088	1326	-0.010827993	0.015935446	0.01750357	0.009174469
APOBEC2_-_41021362.23-P1P2|APOBEC2_-_41021104.23-P1P2	APOBEC2	838	245	903	260	1643	395	1970	488	-0.198406314	-0.223776966	-0.258121152	-0.241227475
APOBEC3A_-_39353663.23-P1P2|APOBEC3A_-_39353687.23-P1P2	APOBEC3A	1287	1249	1485	2099	2944	4562	3592	4067	-0.019647722	0.01098002	-0.007153583	-0.002388636
APOBEC3A_B_-_39353663.23-P1P2|APOBEC3A_B_-_39353687.23-P1P2	APOBEC3A	1287	1249	1485	2099	2944	4562	3592	4067	-0.019647722	0.01098002	-0.007153583	-0.002388636
APOBEC3B_+_39378603.23-P1P2|APOBEC3B_-_39378432.23-P1P2	APOBEC3B	549	682	744	865	1790	2873	2111	2035	0.017169924	-0.017895863	-0.002426508	-0.027688856
APOBEC3C_-_39410336.23-P1P2|APOBEC3C_-_39410342.23-P1P2	APOBEC3C	1579	1767	1868	2679	1709	2717	1995	2698	0.001615033	0.013132809	-0.003711143	0.025548388
APOBEC3D_-_39410336.23-P1P2|APOBEC3D_-_39410342.23-P1P2	APOBEC3D	1579	1767	1868	2679	1709	2717	1995	2698	0.001615033	0.013132809	-0.003711143	0.025548388
APOBEC3F_-_39436896.23-P1P2|APOBEC3F_+_39437128.23-P1P2	APOBEC3F	875	663	913	1020	1447	2064	1635	1843	-0.056556949	-0.023778015	-0.018334409	-0.003093635
APOBEC3G_+_39473517.23-P1P2|APOBEC3G_+_39473587.23-P1P2	APOBEC3G	1017	1185	1193	1591	1238	1901	1485	1765	0.007637055	0.002381894	-0.008403486	0.00523628
APOBEC3H_-_39493307.23-P1P2|APOBEC3H_+_39493488.23-P1P2	APOBEC3H	1026	1119	913	1292	692	1233	859	828	-0.002228773	0.01113381	0.011603437	-0.02769892
APOBEC4_+_183622414.23-P1P2|APOBEC4_-_183622430.23-P1P2	APOBEC4	642	742	507	643	786	1546	1064	1221	0.006413144	-0.005077667	0.024932645	-0.000288297
APOBR_+_28506010.23-P1|APOBR_+_28506013.23-P1	APOBR	487	576	530	672	1177	1845	1516	1637	0.00984448	-0.005112251	-0.005625733	-0.009849538
APOBR_-_28508486.23-P2|APOBR_-_28508435.23-P2	APOBR	798	768	714	850	1739	2770	1896	2046	-0.020890725	-0.014403107	-0.003452239	-0.009950176
APOC1_-_45417829.23-P1P2|APOC1_-_45417876.23-P1P2	APOC1	1103	1646	1015	1342	1418	2735	1740	1946	0.044566034	0.001103349	0.0223304	-0.004329101
APOC2_-_45449332.23-P1P2|APOC2_-_45449342.23-P1P2	APOC2	567	513	726	920	1307	1784	1521	1643	-0.030094728	-0.005178732	-0.024270731	-0.009791995
APOC3_-_116700671.23-P1P2|APOC3_+_116700652.23-P1P2	APOC3	77	152	62	69	474	721	502	705	0.085444423	-0.024568353	-0.009737106	0.031414967
APOC4_+_45445578.23-P1P2|APOC4_+_45445542.23-P1P2	APOC4	695	981	813	1180	1455	2563	2017	2586	0.036236358	0.014868652	0.010105378	0.017155872
APOD_+_195310790.23-P1P2|APOD_-_195310422.23-P1P2	APOD	655	641	714	1035	226	439	238	334	-0.018396999	0.014674041	0.023042324	0.031201302
APOE_-_45409117.23-P1P2|APOE_-_45409137.23-P1P2	APOE	602	696	823	1213	1664	2672	2048	1960	0.006460472	0.017137496	-0.00236642	-0.028829333
APOF_+_56756580.23-P1P2|APOF_+_56756544.23-P1P2	APOF	396	356	482	569	703	1245	821	904	-0.031035966	-0.015661013	0.010784895	-0.006789001
APOH_-_64225487.23-P1|APOH_-_64225515.23-P1	APOH	373	330	529	730	164	193	184	310	-0.033416103	0.00738615	-0.04436147	0.059798776
APOH_+_64224198.23-P2|APOH_-_64224106.23-P2	APOH	438	361	495	643	1054	1590	1426	1534	-0.043977613	-0.001544022	-0.010800703	-0.010445062
APOL1_-_36649201.23-P1P2|APOL1_-_36649205.23-P1P2	APOL1	489	399	507	617	779	1046	756	812	-0.045483876	-0.01116925	-0.026499341	-0.010694928
APOL2_+_36635546.23-P1P2|APOL2_-_36635610.23-P1P2	APOL2	423	360	438	551	1559	2848	1776	2006	-0.039198543	-0.006285132	0.015014134	-0.002774002
APOL3_+_36556775.23-P1P2|APOL3_-_36556720.23-P1P2	APOL3	653	553	790	981	1674	2076	2123	2570	-0.039958298	-0.008170583	-0.03718862	0.008125551
APOL4_-_36597822.23-P1P2|APOL4_-_36597841.23-P1P2	APOL4	738	868	943	1134	1034	1936	1224	1533	0.009025809	-0.012905398	0.018311666	0.013465888
APOL5_-_36113963.23-ENST00000249044.2|APOL5_+_36113958.23-ENST00000249044.2	APOL5	214	119	239	276	724	1443	689	816	-0.102266537	-0.018948632	0.026706494	0.004657053
APOL6_-_36044592.23-P1P2|APOL6_+_36044574.23-P1P2	APOL6	153	222	169	127	628	991	781	646	0.040116031	-0.082088233	-0.004764323	-0.051737997
APOLD1_-_12938628.23-P1P2|APOLD1_+_12938640.23-P1P2	APOLD1	436	410	465	565	1145	1807	1310	1297	-0.024336168	-0.011405545	-0.00471689	-0.023490931
APOM_+_31620267.23-P1P2|APOM_-_31620263.23-P1P2	APOM	171	141	215	155	1205	1328	1302	944	-0.043800221	-0.088245441	-0.053097865	-0.072462965
APOO_+_23925598.23-P1P2|APOO_-_23925881.23-P1P2	APOO	269	202	319	212	1424	1236	1444	770	-0.057771447	-0.100308268	-0.085268671	-0.120752592
APOOL_+_84259102.23-P1P2|APOOL_-_84258921.23-P1P2	APOOL	322	225	434	330	372	458	403	381	-0.068509719	-0.080530164	-0.038218676	-0.030732518
APOPT1_-_104029328.23-P1P2|APOPT1_+_104029375.23-P1P2	APOPT1	883	710	831	510	1889	1520	2206	1161	-0.047700756	-0.112197793	-0.09547892	-0.122847448
APP_+_27543048.23-P1P2|APP_+_27543051.23-P1P2	APP	794	815	820	1124	1852	2835	2379	2371	-0.011281388	0.006422198	-0.008809692	-0.022452792
APPBP2_-_58603391.23-P1P2|APPBP2_+_58603361.23-P1P2	APPBP2	295	176	260	299	1868	3482	2119	2240	-0.091971047	-0.019557123	0.017738836	-0.01319042
APPL1_+_57261807.23-P1P2|APPL1_-_57261822.23-P1P2	APPL1	372	388	328	424	1256	2215	1830	1739	-0.008902482	-0.002296615	0.010253727	-0.029943187
APPL2_+_105629891.23-P1P2|APPL2_-_105629866.23-P1P2	APPL2	806	1091	872	932	1957	2738	2359	2151	0.029993766	-0.030317089	-0.020933631	-0.036438748
APRT_-_88878107.23-P1P2|APRT_-_88878308.23-P1P2	APRT	891	1271	907	1334	1633	2685	1883	1927	0.037825109	0.016832512	0.000821772	-0.018290998
APTX_-_33001547.23-P1|APTX_-_33001417.23-P1	APTX	648	593	902	987	1040	1725	1216	1491	-0.028400419	-0.026844791	0.001981686	0.010129098
APTX_+_33025069.23-P2|APTX_-_33025057.23-P2	APTX	973	1237	1055	1176	819	1015	790	1023	0.020644424	-0.024107145	-0.037294745	0.018694829
AQP1_+_30893087.23-ENST00000509504.1|AQP1_+_30893268.23-ENST00000509504.1	AQP1	938	1388	922	1019	941	1514	909	1024	0.04329783	-0.025371272	-0.00212519	-0.003200554
AQP10_-_154293619.23-P1P2|AQP10_+_154293791.23-P1P2	AQP10	355	412	433	599	1144	1674	1219	1616	0.007005387	0.007733324	-0.014901389	0.022399563
AQP11_-_77301026.23-P1P2|AQP11_-_77301023.23-P1P2	AQP11	677	995	747	1003	938	1241	1241	1214	0.042263765	0.003366688	-0.02848507	-0.025380959
AQP12A_+_241631475.23-P1P2|AQP12A_-_241631463.23-P1P2	AQP12A	878	1312	1059	1379	880	1434	963	941	0.044755626	-0.001146129	-0.000413228	-0.025555139
AQP12B_+_241622264.23-P1P2|AQP12B_+_241621938.23-P1P2	AQP12B	1100	1257	1223	1656	1318	2428	1885	2081	0.004733432	0.004629081	0.016136408	-0.006367955
AQP2_+_50344559.23-P1P2|AQP2_+_50344821.23-P1P2	AQP2	1082	1293	1029	1695	435	645	476	550	0.011409097	0.033575985	-0.013182461	0.000766468
AQP3_-_33447534.23-P1|AQP3_-_33447595.23-P1	AQP3	691	715	634	596	348	436	532	424	-0.010083328	-0.049263922	-0.035874029	-0.057547135
AQP3_+_33443041.23-P2|AQP3_-_33443001.23-P2	AQP3	630	770	757	1075	1065	1729	1300	1353	0.014751383	0.011641199	-0.000905959	-0.015640977
AQP4_+_24445664.23-P1P2|AQP4_+_24445620.23-P1P2	AQP4	849	949	841	1467	1190	1844	1376	1706	0.001436043	0.042025575	-0.007178594	0.011875677
AQP5_+_50355917.23-P1P2|AQP5_-_50355675.23-P1P2	AQP5	1152	1558	1299	1304	1352	2035	1734	2039	0.029879495	-0.039575004	-0.011091835	0.003554957
AQP6_+_50366744.23-P1P2|AQP6_-_50366959.23-P1P2	AQP6	655	705	627	811	1052	159	1178	1190	-0.004204982	-0.002159329	-0.320244858	-0.020329863
AQP7_+_33402012.23-P1P2|AQP7_+_33402004.23-P1P2	AQP7	1449	1844	1616	2132	2121	4653	2630	3356	0.020804909	0.000796523	0.039699831	0.016415131
AQP8_+_25228481.23-P1P2|AQP8_+_25228499.23-P1P2	AQP8	313	291	339	577	1567	2327	1859	1716	-0.026023674	0.038293497	-0.012905875	-0.034508955
AQP9_-_58430619.23-P1P2|AQP9_-_58430777.23-P1P2	AQP9	782	814	851	1228	740	1177	913	1046	-0.009193038	0.014013254	-0.003688249	-0.000549527
AQPEP_-_115298201.23-P1P2|AQPEP_-_115298249.23-P1P2	AQPEP	626	536	732	845	749	825	808	748	-0.038316341	-0.01894936	-0.05317824	-0.034046731
AR_+_66763866.23-P1P2|AR_-_66763917.23-P1P2	AR	442	598	436	384	1009	1493	1360	1180	0.029881657	-0.05886937	-0.013405	-0.044241291
ARAF_-_47420655.23-P1P2|ARAF_-_47420581.23-P1P2	ARAF	908	1278	1259	1369	1419	2209	1556	1628	0.035825214	-0.027770293	-0.006551675	-0.014811001
ARAP1_+_72433345.23-P1|ARAP1_+_72433314.23-P1	ARAP1	306	364	327	411	1253	2248	1335	1662	0.010669287	-0.006438698	0.012568968	0.012522751
ARAP1_+_72463419.23-P2|ARAP1_+_72463416.23-P2	ARAP1	675	858	706	820	1496	2300	1790	1664	0.020604802	-0.018044899	-0.00823099	-0.033399967
ARAP2_-_36245906.23-P1P2|ARAP2_-_36246014.23-P1P2	ARAP2	609	723	558	790	890	1800	989	1230	0.010412832	0.011172048	0.02869556	0.012355048
ARAP3_+_141061783.23-P1P2|ARAP3_+_141061751.23-P1P2	ARAP3	752	1093	957	1286	1652	2798	1980	2266	0.040610608	0.00349634	0.00481929	-0.000706546
ARC_+_143695828.23-P1P2|ARC_-_143695803.23-P1P2	ARC					523	948	572	547			0.013886254	-0.028941525
AREG_+_75311479.23-P1P2|AREG_-_75311544.23-P1P2	AREG	262	266	338	510	518	891	469	699	-0.012920865	0.020517193	0.006827179	0.040748051
AREL1_-_75179713.23-P1P2|AREL1_+_75179717.23-P1P2	AREL1	831	454	978	413	918	789	1034	553	-0.10531154	-0.167363556	-0.086586034	-0.120251627
ARF1_+_228270829.23-P1P2|ARF1_-_228270444.23-P1P2	ARF1	823	913	1124	1077	849	1390	1081	1433	0.000306142	-0.046450619	0.000217693	0.022389312
ARF3_+_49351226.23-P1P2|ARF3_+_49351049.23-P1P2	ARF3	866	895	1065	1230	1447	2482	1736	2012	-0.010261466	-0.018869559	0.006520028	0.001277522
ARF4_-_57583033.23-P1P2|ARF4_+_57583046.23-P1P2	ARF4	618	715	636	986	188	444	258	339	0.006566012	0.024586731	0.049267359	0.020888562
ARF5_-_127228493.23-P1|ARF5_-_127228524.23-P1	ARF5	367	709	425	581	1008	1585	1142	1363	0.082973164	0.005981097	-0.005214183	0.005886991
ARF5_-_127229626.23-P2|ARF5_-_127229665.23-P2	ARF5	756	883	697	667	964	1548	1048	1054	0.007987637	-0.046636184	-0.002385239	-0.02102576
ARF6_-_50359827.23-P1|ARF6_-_50359824.23-P1	ARF6	756	901	730	868	1785	1489	2061	1108	0.010998099	-0.014580476	-0.090624122	-0.119500491
ARF6_+_50361360.23-P2|ARF6_+_50361377.23-P2	ARF6	306	236	227	283	570	1122	551	930	-0.05382444	-0.007677573	0.02500345	0.060313889
ARFGAP1_+_61904219.23-P1P2|ARFGAP1_-_61904178.23-P1P2	ARFGAP1	1169	842	1172	1266	1441	2383	1489	1805	-0.064130072	-0.028747613	0.001593898	0.00833708
ARFGAP2_+_47198411.23-P1P2|ARFGAP2_+_47198415.23-P1P2	ARFGAP2	547	876	607	675	2308	3753	2716	3089	0.055052635	-0.024471137	-0.000663353	-0.001683998
ARFGAP3_-_43253140.23-P1P2|ARFGAP3_-_43253228.23-P1P2	ARFGAP3	406	443	395	654	539	726	572	742	-0.002180291	0.03424224	-0.02609929	0.018952294
ARFGEF1_+_68255970.23-P1P2|ARFGEF1_+_68255550.23-P1P2	ARFGEF1	1248	773	1437	718	2387	1228	2867	986	-0.086641874	-0.142601457	-0.155754792	-0.189744555
ARFGEF2_+_47538281.23-P1P2|ARFGEF2_-_47538312.23-P1P2	ARFGEF2	180	173	191	279	1499	2627	1635	2087	-0.021065723	0.015628104	0.009415366	0.016457407
ARFIP1_+_153701170.23-P1P2|ARFIP1_-_153701186.23-P1P2	ARFIP1	797	983	801	1049	2077	3016	2539	2765	0.016115639	-0.000315065	-0.015919562	-0.008512746
ARFIP2_+_6502528.23-P1P2|ARFIP2_+_6502522.23-P1P2	ARFIP2	476	308	563	367	837	1303	901	1162	-0.080018108	-0.103256108	-0.006573517	0.018060766
ARFRP1_-_62338974.23-P1P2|ARFRP1_+_62339198.23-P1P2	ARFRP1	547	696	486	932	1175	1647	1279	1796	0.020744334	0.055959538	-0.020694409	0.031451697
ARG1_-_131894387.23-P1P2|ARG1_+_131894441.23-P1P2	ARG1	312	232	271	432	902	1729	1118	937	-0.059257267	0.028583008	0.021468765	-0.049682088
ARG2_+_68086667.23-P1P2|ARG2_-_68086620.23-P1P2	ARG2	621	583	658	912	894	1593	1042	1098	-0.024589928	0.008047764	0.011629316	-0.013694908
ARGFX_-_121286824.23-P1P2|ARGFX_-_121286860.23-P1P2	ARGFX	785	964	932	1220	1432	2486	1617	2079	0.015466577	-0.00037664	0.008141079	0.017594044
ARGLU1_-_107220477.23-P1P2|ARGLU1_+_107220466.23-P1P2	ARGLU1	223	43	228	83	263	124	280	92	-0.258231449	-0.188388994	-0.166997027	-0.195888991
ARHGAP1_+_46722124.23-P1P2|ARHGAP1_+_46722099.23-P1P2	ARHGAP1	1014	1237	1024	1235	1519	2357	1925	2079	0.014486448	-0.012472888	-0.006987473	-0.009821015
ARHGAP10_-_148653268.23-P1P2|ARHGAP10_+_148653282.23-P1P2	ARHGAP10	691	853	731	1405	999	1902	1126	1526	0.016239289	0.056341273	0.020562356	0.025864559
ARHGAP11A_-_32908159.23-P1P2|ARHGAP11A_-_32907745.23-P1P2	ARHGAP11A	609	559	793	884	1083	1406	1070	1007	-0.027947714	-0.024103665	-0.031028111	-0.031461001
ARHGAP11B_-_30918647.23-P1P2|ARHGAP11B_-_30918642.23-P1P2	ARHGAP11B	674	701	857	939	891	1342	977	1171	-0.009317699	-0.026650319	-0.011020062	0.006546528
ARHGAP12_+_32217575.23-P1P2|ARHGAP12_-_32217708.23-P1P2	ARHGAP12	763	763	895	1147	1745	2573	2010	2046	-0.015175207	-0.003508014	-0.0138598	-0.019131572
ARHGAP15_-_143887002.23-P1P2|ARHGAP15_-_143887035.23-P1P2	ARHGAP15	255	111	340	466	453	722	401	625	-0.13863743	0.006338175	-0.003453739	0.047757101
ARHGAP17_-_25026675.23-P1P2|ARHGAP17_+_25026532.23-P1P2	ARHGAP17	810	709	873	1003	858	1477	998	935	-0.03503886	-0.019645096	0.006977372	-0.032171285
ARHGAP18_-_130031326.23-P1P2|ARHGAP18_-_130031261.23-P1P2	ARHGAP18	757	676	667	662	799	1139	738	1174	-0.032053262	-0.041253017	-0.018438919	0.0510338
ARHGAP19_+_99052371.23-P1P2|ARHGAP19_-_99052346.23-P1P2	ARHGAP19	875	937	919	1048	1417	2280	1646	1462	-0.004962261	-0.020746036	-0.002098079	-0.040561104
ARHGAP20_+_110583103.23-P1P2|ARHGAP20_+_110583100.23-P1P2	ARHGAP20	753	953	850	1293	1482	2010	1832	2032	0.01996193	0.021804955	-0.025127465	-0.005630437
ARHGAP21_+_25012355.23-P1P2|ARHGAP21_+_25012738.23-P1P2	ARHGAP21	1060	1521	1235	1579	1945	3259	2434	2516	0.038711305	-0.003846763	0.003374009	-0.016712224
ARHGAP22_-_49813131.23-P1P2|ARHGAP22_+_49813140.23-P1P2	ARHGAP22	1038	897	888	1070	1148	1313	1373	858	-0.036956605	-0.012611379	-0.048100176	-0.095821865
ARHGAP23_+_36584749.23-P1P2|ARHGAP23_+_36584742.23-P1P2	ARHGAP23	156	171	149	198	1505	2249	1928	2271	-0.001547463	0.001640954	-0.012061227	0.00382499
ARHGAP24_-_86396380.23-P1P2|ARHGAP24_-_86396392.23-P1P2	ARHGAP24	698	556	697	1038	1259	2146	1593	1841	-0.049089816	0.018658452	0.005667299	0.00082736
ARHGAP25_-_68962176.23-P1P2|ARHGAP25_+_68962004.23-P1P2	ARHGAP25	954	845	890	1121	1172	1954	1202	1375	-0.033274903	-0.006067098	0.002682919	-0.000784156
ARHGAP26_-_142150021.23-P1P2|ARHGAP26_-_142150018.23-P1P2	ARHGAP26	634	656	779	634	1567	307	1556	378	-0.010088584	-0.070543827	-0.285624454	-0.244223962
ARHGAP27_-_43487747.23-P1|ARHGAP27_-_43487732.23-P1	ARHGAP27	608	644	537	755	1628	2741	1647	1728	-0.006597885	0.010142402	0.00401716	-0.014374363
ARHGAP27_+_43502986.23-P2|ARHGAP27_+_43503003.23-P2	ARHGAP27	588	737	567	818	1791	2807	2008	2067	0.018505247	0.013953105	-0.005634211	-0.017369238
ARHGAP28_+_6729759.23-P1P2|ARHGAP28_+_6729774.23-P1P2	ARHGAP28	694	451	579	682	1937	3135	2316	2562	-0.079428851	-0.015979256	-0.001299193	-0.006047885
ARHGAP29_+_94703085.23-P1P2|ARHGAP29_+_94702836.23-P1P2	ARHGAP29	741	1080	838	1342	1317	2052	1442	1882	0.041023078	0.029398194	-0.006436925	0.019948437
ARHGAP30_+_161039652.23-P1P2|ARHGAP30_-_161039638.23-P1P2	ARHGAP30	851	1125	811	990	1251	2058	1505	1582	0.02646884	-0.010695173	0.000883263	-0.014077977
ARHGAP31_+_119013334.23-P1P2|ARHGAP31_-_119013294.23-P1P2	ARHGAP31	985	1313	1068	1391	1601	2722	1859	1800	0.027713585	-0.001116072	0.005333129	-0.026994436
ARHGAP32_+_129062200.23-ENST00000310343.9|ARHGAP32_-_129062212.23-ENST00000310343.9	ARHGAP32	445	482	582	760	963	1244	1045	1432	-0.003272569	-0.000757136	-0.031702586	0.027603187
ARHGAP33_+_36266681.23-P1P2|ARHGAP33_+_36266470.23-P1P2	ARHGAP33	841	421	780	534	1101	706	1355	639	-0.118340552	-0.096062897	-0.126037426	-0.140048845
ARHGAP35_-_47421941.23-ENST00000404338.3|ARHGAP35_-_47422000.23-ENST00000404338.3	ARHGAP35	640	668	820	1213	1177	2104	1097	1297	-0.008789922	0.017676647	0.012076854	0.004403249
ARHGAP36_+_130192380.23-P1P2|ARHGAP36_-_130192288.23-P1P2	ARHGAP36	744	869	827	1057	419	969	477	554	0.007989905	-0.003909146	0.046667015	0.001574985
ARHGAP39_+_145911186.23-P1P2|ARHGAP39_+_145911217.23-P1P2	ARHGAP39	466	708	566	740	677	1288	798	851	0.047181219	-0.000580472	0.020433339	-0.011818605
ARHGAP4_-_153200217.23-P1|ARHGAP4_-_153200438.23-P1	ARHGAP4	741	564	874	649	1531	2392	1662	1757	-0.055875861	-0.084081303	-0.006061146	-0.013182948
ARHGAP40_-_37230545.23-P1P2|ARHGAP40_+_37230557.23-P1P2	ARHGAP40	635	646	653	850	841	1286	952	1181	-0.012614239	-0.001221488	-0.008984901	0.011957184
ARHGAP42_+_100558059.23-P1P2|ARHGAP42_-_100558046.23-P1P2	ARHGAP42	649	504	657	804	728	1204	952	903	-0.052872549	-0.01033699	0.001568605	-0.030227697
ARHGAP44_-_12693204.23-P1P2|ARHGAP44_-_12692860.23-P1P2	ARHGAP44	1123	1498	1110	1384	1184	1632	1224	1617	0.027822552	-0.00755769	-0.022955199	0.021853361
ARHGAP5_+_32546214.23-P1P2|ARHGAP5_-_32546259.23-P1P2	ARHGAP5	971	1336	980	1088	1556	2537	1915	1933	0.032440864	-0.024704027	-0.000311704	-0.020451942
ARHGAP6_+_11445607.23-P1P2|ARHGAP6_+_11445878.23-P1P2	ARHGAP6	815	723	1066	649	984	661	1098	600	-0.033040575	-0.113405612	-0.119771109	-0.116879938
ARHGAP8_-_45098408.23-P1|ARHGAP8_+_45098588.23-P1	ARHGAP8	722	1124	934	1000	1657	2836	2100	2269	0.050855585	-0.030060094	0.00623026	-0.009751189
ARHGAP8_-_45148512.23-P2|ARHGAP8_-_45148515.23-P2	ARHGAP8	1402	1660	1313	1729	2329	3560	2831	3091	0.010035669	0.00051399	-0.009000549	-0.008104197
ARHGAP9_-_57871601.23-P1P2|ARHGAP9_-_57871616.23-P1P2	ARHGAP9	483	410	469	524	737	1346	1166	1476	-0.039592252	-0.023784175	0.014934465	0.015139665
ARHGDIA_-_79829179.23-P1P2|ARHGDIA_+_79829172.23-P1P2	ARHGDIA	1218	1316	1098	1616	1551	2640	1910	2295	-0.00362684	0.016940376	0.005485737	0.006953144
ARHGDIB_+_15114500.23-P1P2|ARHGDIB_+_15114492.23-P1P2	ARHGDIB	347	437	502	725	845	1384	861	992	0.019177129	0.014100505	0.000270846	0.00033493
ARHGDIG_-_330602.23-P1P2|ARHGDIG_-_330659.23-P1P2	ARHGDIG	695	975	553	889	1355	2442	1901	2231	0.03532105	0.029931264	0.013181152	0.003248118
ARHGEF1_-_42387296.23-P1|ARHGEF1_-_42387322.23-P1	ARHGEF1	871	878	956	815	1533	2153	1691	1610	-0.013981104	-0.063702868	-0.020424167	-0.029640961
ARHGEF1_-_42388477.23-P2|ARHGEF1_-_42388487.23-P2	ARHGEF1	871	1146	1129	1177	1997	4003	2421	2386	0.025763235	-0.033993182	0.027535237	-0.024213177
ARHGEF10_-_1772144.23-P1P2|ARHGEF10_+_1772299.23-P1P2	ARHGEF10	1028	1375	1030	1419	1890	3338	2226	2681	0.028224119	0.007177908	0.010468072	0.007325315
ARHGEF10L_-_17866424.23-P1P2|ARHGEF10L_+_17866293.23-P1P2	ARHGEF10L	728	982	589	799	1246	2431	1595	1609	0.02946999	0.004866273	0.023871346	-0.020549019
ARHGEF11_-_157015113.23-P1P2|ARHGEF11_-_157015491.23-P1P2	ARHGEF11	340	309	379	740	477	985	572	763	-0.029409526	0.058574171	0.031431651	0.023337291
ARHGEF12_+_120207088.23-P1P2|ARHGEF12_+_120207116.23-P1P2	ARHGEF12	813	901	892	1162	1298	1965	1555	1656	0.000155915	-0.001093361	-0.010317427	-0.01202868
ARHGEF15_+_8213591.23-P1P2|ARHGEF15_+_8214130.23-P1P2	ARHGEF15	1063	953	1082	1625	780	1322	935	869	-0.031473031	0.019928668	0.00487479	-0.033427226
ARHGEF16_-_3371005.23-P1P2|ARHGEF16_-_3371252.23-P1P2	ARHGEF16	846	326	828	314	1948	726	2251	407	-0.157315096	-0.183177304	-0.199155624	-0.290687056
ARHGEF17_-_73019356.23-P1P2|ARHGEF17_-_73019377.23-P1P2	ARHGEF17	1148	1231	1024	1004	658	1027	707	780	-0.0047587	-0.043055187	-0.006240043	-0.006484335
ARHGEF18_-_7460074.23-P1P2|ARHGEF18_-_7460077.23-P1P2	ARHGEF18	1292	1768	1074	1321	2621	3656	3107	3109	0.031637606	-0.009570154	-0.021333216	-0.02182186
ARHGEF19_+_16533491.23-P1P2|ARHGEF19_+_16533485.23-P1P2	ARHGEF19	499	600	591	598	1104	1702	1305	1675	0.012302733	-0.038404856	-0.007871616	0.017320907
ARHGEF2_-_155948223.23-P1P2|ARHGEF2_-_155948140.23-P1P2	ARHGEF2	372	481	409	549	509	882	502	873	0.023112321	0.003280481	0.007818489	0.064998947
ARHGEF25_+_58005227.23-P1P2|ARHGEF25_-_58005266.23-P1P2	ARHGEF25	699	715	752	868	1424	2050	1569	1629	-0.011799983	-0.018963515	-0.017092784	-0.016022588
ARHGEF26_+_153839215.23-P1P2|ARHGEF26_-_153839264.23-P1P2	ARHGEF26	1132	888	1183	854	782	1419	902	991	-0.051395966	-0.088264649	0.01406994	-0.007134177
ARHGEF28_-_72922052.23-P1P2|ARHGEF28_+_72922024.23-P1P2	ARHGEF28	125	77	96	67	1594	2506	1756	1913	-0.086798158	-0.092647563	-0.005219886	-0.008457786
ARHGEF3_-_56835979.23-P1P2|ARHGEF3_-_56835924.23-P1P2	ARHGEF3	1081	1495	1154	1175	1268	1193	1697	2386	0.033210888	-0.037478997	-0.074406317	0.031660586
ARHGEF33_-_39146583.23-ENST00000398800.4|ARHGEF33_-_39146566.23-ENST00000398800.4	ARHGEF33	412	343	369	574	801	1249	820	955	-0.042476782	0.025025253	-0.006355552	0.002027684
ARHGEF35_+_143892694.23-ENST00000378115.2|ARHGEF35_-_143892637.23-ENST00000378115.2	ARHGEF35	712	391	521	368	2941	4900	3497	3827	-0.104517694	-0.091415903	0.002618742	-0.007739803
ARHGEF35_+_143991205.23-ENST00000543357.1|ARHGEF35_-_143991217.23-ENST00000543357.1	ARHGEF35	747	266	724	414	734	1160	731	792	-0.169025986	-0.122608594	-0.004552013	-0.009330133
ARHGEF37_-_148961080.23-P1|ARHGEF37_-_148961062.23-P1	ARHGEF37	585	792	455	683	1015	2472	1372	2009	0.030002868	0.019792242	0.053747989	0.038040277
ARHGEF37_+_148931230.23-P2|ARHGEF37_-_148931256.23-P2	ARHGEF37	48	75	50	51	1191	2028	1588	1540	0.050375277	-0.037272115	0.00552582	-0.026748833
ARHGEF38_+_106473860.23-P1P2|ARHGEF38_-_106473807.23-P1P2	ARHGEF38	480	651	611	1010	891	1672	1090	1338	0.030252854	0.034056273	0.018604063	0.010302107
ARHGEF39_-_35665151.23-P1P2|ARHGEF39_-_35665155.23-P1P2	ARHGEF39	1133	1559	1383	1637	1460	2372	1845	2013	0.032456821	-0.015235533	-0.00079462	-0.008219565
ARHGEF4_-_131792637.23-P1P2|ARHGEF4_-_131792624.23-P1P2	ARHGEF4	840	1094	863	1325	970	1502	1171	1410	0.024240235	0.023174932	-0.007285659	0.007274905
ARHGEF40_-_21538483.23-P1P2|ARHGEF40_-_21538491.23-P1P2	ARHGEF40	752	970	689	910	1674	2718	2002	2778	0.022798026	0.000928737	-0.000873206	0.029593116
ARHGEF5_-_144052529.23-P1P2|ARHGEF5_+_144052450.23-P1P2	ARHGEF5	864	1332	1028	1568	2941	4900	3497	3827	0.049411205	0.02221436	0.002618742	-0.007739803
ARHGEF6_-_135863048.23-P1P2|ARHGEF6_+_135863011.23-P1P2	ARHGEF6	252	171	293	390	465	643	491	692	-0.07280759	0.002004327	-0.022572675	0.031969738
ARHGEF7_-_111767696.23-ENST00000370623.3|ARHGEF7_+_111767892.23-ENST00000370623.3	ARHGEF7	875	1272	1082	1499	1290	2240	1543	1732	0.040645667	0.008006049	0.008167784	-0.003755249
ARHGEF9_+_62974948.23-P1P2|ARHGEF9_+_62974965.23-P1P2	ARHGEF9	672	693	750	913	1027	1566	1011	1100	-0.010586267	-0.011107475	-0.009354527	-0.008661871
ARID1A_+_27022576.23-P1P2|ARID1A_-_27022530.23-P1P2	ARID1A	538	503	597	713	1159	1718	1288	1568	-0.025202281	-0.013935618	-0.013160151	0.009003114
ARID1B_+_157098803.23-P1|ARID1B_-_157099145.23-P1	ARID1B	454	480	470	952	1822	2946	2018	1803	-0.006875999	0.064032678	-0.001432323	-0.039637526
ARID1B_+_157100315.23-P2|ARID1B_-_157100366.23-P2	ARID1B	715	1069	1040	1313	1785	2988	1895	2257	0.044822651	-0.005716702	0.003240417	0.005567283
ARID2_-_46123742.23-P1P2|ARID2_-_46123531.23-P1P2	ARID2	267	55	365	66	1499	803	1880	745	-0.24899863	-0.291127138	-0.150276024	-0.167424956
ARID3A_+_926082.23-P1P2|ARID3A_-_926022.23-P1P2	ARID3A	283	166	323	293	1207	1367	1221	1118	-0.094475706	-0.054504905	-0.04942155	-0.035776313
ARID3B_-_74833936.23-P1P2|ARID3B_+_74833663.23-P1P2	ARID3B	994	1078	1087	1586	1039	1651	1257	1295	-0.003071021	0.015659155	-0.003797028	-0.017241084
ARID3C_-_34628471.23-P1P2|ARID3C_-_34628531.23-P1P2	ARID3C	215	154	255	406	1105	2234	1295	1669	-0.064736604	0.028390857	0.028660289	0.017965959
ARID4A_-_58765292.23-P1P2|ARID4A_+_58765344.23-P1P2	ARID4A	643	341	654	779	1369	2338	1496	1641	-0.109695327	-0.014324898	0.005930618	-0.007377822
ARID4B_+_235491464.23-P1P2|ARID4B_+_235491445.23-P1P2	ARID4B	741	958	821	1444	2044	3648	2418	2706	0.023138626	0.043244772	0.011882425	-0.004225782
ARID5A_-_97202536.23-P1P2|ARID5A_+_97202543.23-P1P2	ARID5A	887	1351	919	1258	1813	3002	2215	2282	0.047605701	0.006227695	0.001773052	-0.017236811
ARID5B_-_63660959.23-ENST00000279873.7|ARID5B_+_63661162.23-ENST00000279873.7	ARID5B	757	462	778	713	1322	1082	1403	888	-0.08879691	-0.053021462	-0.093181138	-0.093819209
ARIH1_-_72766733.23-P1P2|ARIH1_-_72766755.23-P1P2	ARIH1	419	55	521	125	663	142	752	54	-0.316095558	-0.250247571	-0.273217425	-0.433607511
ARIH2_+_48956345.23-P1P2|ARIH2_-_48956298.23-P1P2	ARIH2	748	783	711	1378	1158	2054	1484	2124	-0.00835451	0.057569989	0.011027988	0.03445642
ARIH2OS_+_48956620.23-P1P2|ARIH2OS_-_48956929.23-P1P2	ARIH2OS	1147	1589	1103	1676	1014	2051	1103	1374	0.033469112	0.021654949	0.028718939	0.012612531
ARL1_+_101801468.23-P1P2|ARL1_-_101801545.23-P1P2	ARL1	981	210	902	206	1608	851	2031	743	-0.244831524	-0.257877606	-0.15191564	-0.179995683
ARL10_+_175792529.23-P1P2|ARL10_-_175792511.23-P1P2	ARL10	621	742	762	999	992	1749	1089	1438	0.011372167	-0.000158318	0.010208499	0.021777963
ARL11_-_50202704.23-P1P2|ARL11_+_50202693.23-P1P2	ARL11	760	961	883	1213	886	1327	1159	1022	0.01982898	0.006747944	-0.011776563	-0.041696096
ARL13A_+_100224727.23-P1P2|ARL13A_-_100224705.23-P1P2	ARL13A	221	103	251	318	498	848	406	629	-0.128423255	-0.00529278	0.005464148	0.046814449
ARL13B_-_93699034.23-P1P2|ARL13B_-_93699028.23-P1P2	ARL13B	470	425	413	574	933	2254	1323	1170	-0.030172477	0.008416083	0.052651834	-0.041242812
ARL14_+_160395022.23-P1P2|ARL14_-_160394974.23-P1P2	ARL14	236	158	269	293	367	672	406	600	-0.074788074	-0.027554659	0.015200223	0.039400399
ARL14EP_+_30344555.23-P1P2|ARL14EP_-_30344703.23-P1P2	ARL14EP	337	396	363	422	1246	2179	1256	1682	0.00885334	-0.017937603	0.009122272	0.02399302
ARL14EPL_-_115387369.23-ENST00000601302.2|ARL14EPL_-_115387263.23-ENST00000601302.2	ARL14EPL	703	689	639	929	1376	2226	1635	1887	-0.01817511	0.015099241	-0.001372463	0.000616301
ARL15_-_53606154.23-P1P2|ARL15_-_53605934.23-P1P2	ARL15	807	1272	1197	2459	1367	2751	1629	2639	0.052713532	0.066213134	0.028051765	0.053940178
ARL16_+_79650729.23-P1P2|ARL16_+_79650784.23-P1P2	ARL16	632	730	718	913	1180	2021	1376	1563	0.006322299	-0.004670884	0.006309876	-0.00188905
ARL17A_+_44656972.23-ENST00000329240.4,ENST00000336125.5,ENST00000445552.2|ARL17A_+_44656984.23-ENST00000329240.4,ENST00000336125.5,ENST00000445552.2	ARL17A	1246	1350	1213	1770	2336	3656	2694	2793	-0.003211831	0.0156768	-0.005818268	-0.016247305
ARL17B_+_44439047.23-ENST00000434041.2,ENST00000450673.3,ENST00000570618.1|ARL17B_+_44439059.23-ENST00000434041.2,ENST00000450673.3,ENST00000570618.1	ARL17B	1246	1350	1213	1770	2336	3656	2694	2793	-0.003211831	0.0156768	-0.005818268	-0.016247305
ARL2_-_64781999.23-P1P2|ARL2_-_64781781.23-P1P2	ARL2	335	80	311	19	1561	1017	1577	666	-0.227645954	-0.446236101	-0.123917313	-0.157401644
ARL2BP_-_57279168.23-P1P2|ARL2BP_-_57279134.23-P1P2	ARL2BP	671	646	784	723	1005	1582	1327	1579	-0.020837269	-0.052099711	-0.005067982	0.005412745
ARL3_+_104474107.23-P1P2|ARL3_-_104474089.23-P1P2	ARL3	444	494	447	551	1834	3070	2490	2703	0.000727815	-0.009284906	0.003240195	-0.009014657
ARL4A_-_12726525.23-P1P2|ARL4A_-_12727353.23-P1P2	ARL4A	996	1305	1109	1387	982	1633	1217	1087	0.025144616	-0.007104747	0.002325823	-0.039680492
ARL4C_+_235405676.23-P1P2|ARL4C_+_235405481.23-P1P2	ARL4C	580	576	569	959	1759	2352	1959	2365	-0.016206971	0.036914167	-0.027040417	0.007694862
ARL4D_-_41476546.23-P1P2|ARL4D_-_41476396.23-P1P2	ARL4D	719	1135	772	946	981	1377	1221	1456	0.052929765	-0.010132603	-0.020511906	0.005749406
ARL5A_+_152684919.23-P1P2|ARL5A_+_152684710.23-P1P2	ARL5A	468	786	626	889	1088	2007	1384	1575	0.062130768	0.011634188	0.016308127	-0.001597926
ARL5B_-_18948344.23-P1P2|ARL5B_-_18948348.23-P1P2	ARL5B	566	531	627	727	908	1151	974	1237	-0.024690992	-0.018300853	-0.034249518	0.015649144
ARL5C_+_37322383.23-P1P2|ARL5C_-_37322341.23-P1P2	ARL5C	552	855	752	983	1024	1530	1268	1374	0.050076482	-0.000592394	-0.012094204	-0.009301525
ARL6_-_97483565.23-P1P2|ARL6_+_97483472.23-P1P2	ARL6	812	1140	999	1320	1666	2895	2284	2675	0.035442964	0.001008222	0.008275621	0.002927962
ARL6IP1_+_18812826.23-P1|ARL6IP1_+_18812823.23-P1	ARL6IP1	396	451	479	753	1317	2411	1405	1838	0.004201995	0.026612695	0.015291699	0.020315196
ARL6IP1_-_18809346.23-P2|ARL6IP1_-_18809283.23-P2	ARL6IP1	441	451	560	875	1192	1854	1483	1520	-0.011833964	0.025731545	-0.006676001	-0.01804858
ARL6IP4_-_123465296.23-P1P2|ARL6IP4_+_123465234.23-P1P2	ARL6IP4	788	912	830	874	1008	1307	1034	1276	0.006624955	-0.032515951	-0.031198317	0.011133394
ARL6IP5_-_69134175.23-P1P2|ARL6IP5_-_69134411.23-P1P2	ARL6IP5	654	794	589	656	1286	1839	1376	1605	0.013754395	-0.024243013	-0.017996696	0.00228013
ARL6IP6_-_153574693.23-P1P2|ARL6IP6_-_153574615.23-P1P2	ARL6IP6	626	314	617	383	876	487	1183	487	-0.117981999	-0.110480609	-0.145229351	-0.161368655
ARL8A_-_202113804.23-P1P2|ARL8A_+_202113836.23-P1P2	ARL8A	826	872	605	802	1561	1786	2077	1793	-0.007090908	0.001464342	-0.04804796	-0.045043653
ARL8B_+_5164015.23-P1P2|ARL8B_+_5164028.23-P1P2	ARL8B	806	1032	925	1353	1788	2775	2252	2626	0.021698466	0.016019818	-0.006953661	0.002239297
ARL9_+_57371636.23-P1P2|ARL9_-_57371648.23-P1P2	ARL9	656	850	735	975	1059	2045	1346	1571	0.023465141	0.001576349	0.022475096	0.002379153
ARMC1_-_66546391.23-P1P2|ARMC1_+_66546422.23-P1P2	ARMC1	741	752	788	985	357	477	312	373	-0.012977414	-0.007195479	-0.027215638	0.006089539
ARMC10_+_102715597.23-P1P2|ARMC10_-_102715615.23-P1P2	ARMC10	270	326	296	450	1651	2648	1941	2256	0.012878394	0.021605972	-0.002525626	0.001726137
ARMC12_-_35704889.23-P1P2|ARMC12_+_35704899.23-P1P2	ARMC12	330	414	317	368	1120	1678	1283	1695	0.018601203	-0.018155345	-0.011723589	0.021860025
ARMC2_+_109169685.23-P1P2|ARMC2_-_109169691.23-P1P2	ARMC2	751	567	772	805	834	701	939	568	-0.057084289	-0.033962991	-0.089585376	-0.100901488
ARMC3_-_23217021.23-P1P2|ARMC3_-_23217031.23-P1P2	ARMC3	1054	1258	1185	1404	1623	2718	1675	1911	0.011225961	-0.015094682	0.003295903	-0.001196746
ARMC4_-_28287617.23-P1P2|ARMC4_-_28287610.23-P1P2	ARMC4	319	394	314	445	711	1210	720	929	0.016272076	0.011260416	0.005419753	0.018123982
ARMC5_-_31470848.23-P1P2|ARMC5_+_31470860.23-P1P2	ARMC5	888	1019	1072	1784	918	1599	1098	1117	0.005354175	0.035090551	0.008567923	-0.019226362
ARMC6_+_19144442.23-P1P2|ARMC6_-_19144470.23-P1P2	ARMC6	100	131	110	157	1097	1945	1318	1525	0.024802292	0.012046584	0.010969654	0.001011544
ARMC7_+_73106080.23-P1P2|ARMC7_-_73106057.23-P1P2	ARMC7	372	119	488	267	1374	1151	1657	1151	-0.184548004	-0.129036033	-0.090051333	-0.079208051
ARMC8_-_137906385.23-P1P2|ARMC8_-_137906605.23-P1P2	ARMC8	500	554	582	606	1722	1428	1854	2170	0.000112285	-0.034179261	-0.091418238	0.002825082
ARMC9_+_232063449.23-P1P2|ARMC9_+_232063422.23-P1P2	ARMC9	908	1027	887	1217	644	1406	730	838	0.003198299	0.006566837	0.0389713	-0.000243744
ARMCX1_-_100805594.23-P1P2|ARMCX1_-_100805586.23-P1P2	ARMCX1	262	242	377	433	966	1250	952	858	-0.026987472	-0.019721456	-0.031473305	-0.038260918
ARMCX2_-_100914798.23-P1P2|ARMCX2_-_100914849.23-P1P2	ARMCX2	665	792	710	727	284	545	275	262	0.01089091	-0.036649726	0.021465484	-0.029513632
ARMCX3_+_100878194.23-P1P2|ARMCX3_+_100878168.23-P1P2	ARMCX3	858	1174	1117	1268	1444	2024	1780	1632	0.031608512	-0.021415813	-0.020692144	-0.035572221
ARMCX4_-_100740511.23-P1P2|ARMCX4_-_100740693.23-P1P2	ARMCX4	641	249	751	406	1159	364	1277	315	-0.156028747	-0.130890787	-0.222094841	-0.241758551
ARMCX5_-_101854500.23-P1P2|ARMCX5_-_101854491.23-P1P2	ARMCX5	1346	1304	1190	1539	2269	3716	2580	2974	-0.01990606	-0.002155049	0.000297947	0.000428025
ARMCX5-GPRASP2_-_101854500.23-P1P2|ARMCX5-GPRASP2_-_101854491.23-P1P2	ARMCX5-GPRASP2	1346	1304	1190	1539	2269	3716	2580	2974	-0.01990606	-0.002155049	0.000297947	0.000428025
ARMCX6_-_100872930.23-P1P2|ARMCX6_-_100872948.23-P1P2	ARMCX6	1021	1295	869	1396	1525	2551	1637	1997	0.020297932	0.029862141	0.00314159	0.009333336
ARMS2_+_124214237.23-P1P2|ARMS2_+_124214219.23-P1P2	ARMS2	560	657	707	1047	1274	1786	1270	1611	0.008643304	0.017830659	-0.02067439	0.015469267
ARNT_+_150848808.23-P1P2|ARNT_+_150849017.23-P1P2	ARNT	532	529	545	1037	1071	1319	1016	1128	-0.016018185	0.054820017	-0.038133209	-0.00548623
ARNT2_-_80696751.23-P1P2|ARNT2_+_80696737.23-P1P2	ARNT2	938	1125	932	1001	1906	3056	2444	2616	0.011947957	-0.029595973	-0.002565107	-0.01122738
ARNTL_+_13299385.23-P1P2|ARNTL_-_13299382.23-P1P2	ARNTL	813	1297	1002	1201	1706	2781	1923	2242	0.054513166	-0.013388825	-0.000336355	0.002212245
ARNTL2_+_27485837.23-P1P2|ARNTL2_+_27485847.23-P1P2	ARNTL2	825	1153	1013	789	1848	2949	2072	2365	0.034765739	-0.077041323	-0.003204545	-0.001123727
ARPC1A_+_98923614.23-P1P2|ARPC1A_-_98923643.23-P1P2	ARPC1A	335	344	321	466	1762	2482	1781	2033	-0.011227471	0.014812668	-0.020019306	-0.001113653
ARPC1B_-_98972410.23-P1P2|ARPC1B_-_98972364.23-P1P2	ARPC1B	137	41	385	62	1089	168	1293	87	-0.19283639	-0.308090915	-0.317522555	-0.444844582
ARPC2_+_219082121.23-P1|ARPC2_-_219081929.23-P1	ARPC2	634	397	717	690	1126	1656	1084	1286	-0.084946238	-0.045808233	-0.014221708	0.004938111
ARPC3_-_110888149.23-P1|ARPC3_+_110888087.23-P1	ARPC3	677	530	810	780	864	1616	1201	1432	-0.05167349	-0.045714097	0.018157877	0.005732516
ARPC4_-_9834808.23-P1P2|ARPC4_-_9834275.23-P1P2	ARPC4	1100	482	1099	564	1469	1923	1823	1399	-0.138231043	-0.138624075	-0.029903338	-0.063545631
ARPC4-TTLL3_-_9834275.23-P1|ARPC4-TTLL3_+_9834261.23-P1	ARPC4-TTLL3	697	464	720	974	992	1387	1219	1091	-0.075837352	0.004468519	-0.021038917	-0.039361268
ARPC4-TTLL3_+_9839357.23-P2|ARPC4-TTLL3_+_9839379.23-P2	ARPC4-TTLL3	922	1158	944	1318	1540	2528	1735	1930	0.018828728	0.009146323	0.000602039	-0.005174844
ARPC5_+_183604818.23-P1P2|ARPC5_+_183604896.23-P1P2	ARPC5	746	725	777	819	1039	1724	1069	1119	-0.019433871	-0.032370539	0.002033129	-0.014737906
ARPC5L_+_127631498.23-P1|ARPC5L_-_127631510.23-P1	ARPC5L	276	260	356	546	622	1258	782	1035	-0.024060939	0.022933047	0.028665033	0.022127072
ARPC5L_-_127624450.23-P2|ARPC5L_+_127624418.23-P2	ARPC5L	162	102	141	137	1908	3350	2295	2372	-0.083728791	-0.044366074	0.009674414	-0.016733378
ARPP19_+_52861215.23-P1P2|ARPP19_+_52861067.23-P1P2	ARPP19	917	1103	1059	1154	875	1044	936	1134	0.012379049	-0.027455085	-0.042407307	0.008237384
ARPP21_-_35683772.23-ENST00000187397.4|ARPP21_-_35683895.23-ENST00000187397.4	ARPP21	275	230	308	387	1151	1655	1305	1674	-0.041756513	-0.006489795	-0.017261346	0.017227008
ARR3_+_69488236.23-P1P2|ARR3_+_69488261.23-P1P2	ARR3	294	271	303	516	663	1170	636	781	-0.02729822	0.03835069	0.010301642	0.010342497
ARRB1_-_75062680.23-P1P2|ARRB1_+_75062646.23-P1P2	ARRB1	435	453	473	679	1509	2036	2008	2443	-0.009133368	0.01320261	-0.025828124	0.008912997
ARRB2_-_4613971.23-P1P2|ARRB2_-_4614022.23-P1P2	ARRB2	214	33	257	144	1426	2614	1569	1741	-0.290613096	-0.125318482	0.015473575	-0.005567554
ARRDC1_+_140500210.23-P1P2|ARRDC1_+_140500153.23-P1P2	ARRDC1	524	826	514	627	1452	2219	1691	1688	0.052689173	-0.010819477	-0.009040503	-0.022202266
ARRDC2_-_18119049.23-P1|ARRDC2_+_18118989.23-P1	ARRDC2	452	364	488	656	1012	1590	1215	1364	-0.047433446	0.003511136	-0.005323243	-0.00373793
ARRDC2_+_18111987.23-P2|ARRDC2_+_18111983.23-P2	ARRDC2	1289	1786	1109	1577	1285	1988	1348	1657	0.033496488	0.011859356	-0.007393058	0.010525531
ARRDC3_+_90679122.23-P1P2|ARRDC3_-_90679139.23-P1P2	ARRDC3	223	364	238	494	502	1258	544	914	0.057743813	0.067482345	0.057513049	0.059594436
ARRDC4_+_98503956.23-P1P2|ARRDC4_+_98503988.23-P1P2	ARRDC4	1029	654	946	687	1649	2200	2052	1382	-0.082781576	-0.087371524	-0.027342545	-0.084074919
ARRDC5_-_4902803.23-P1P2|ARRDC5_+_4902700.23-P1P2	ARRDC5	706	899	702	1003	857	1463	854	1167	0.020871873	0.012538162	0.005851182	0.027154789
ARSA_+_51066539.23-P1P2|ARSA_+_51066550.23-P1P2	ARSA	646	673	651	588	1401	1677	1791	1478	-0.009069319	-0.055163376	-0.041962803	-0.052124659
ARSB_+_78281066.23-P1P2|ARSB_+_78281107.23-P1P2	ARSB	659	1040	546	687	1112	1478	1314	1434	0.05288195	-0.006242058	-0.027858869	-0.008183926
ARSD_+_2847160.23-P1P2|ARSD_+_2847390.23-P1P2	ARSD	814	670	824	805	1298	2257	1369	1655	-0.044211158	-0.043586527	0.008353804	0.00790537
ARSE_-_2882306.23-P1P2|ARSE_-_2882125.23-P1P2	ARSE	328	338	431	603	517	867	553	644	-0.010703396	0.00939826	0.003409775	0.002004214
ARSF_+_2984866.23-P1P2|ARSF_-_2984913.23-P1P2	ARSF	851	861	894	1281	851	1629	1050	1374	-0.013432511	0.012976071	0.021279278	0.020352717
ARSG_+_66255385.23-ENST00000448504.2|ARSG_+_66255329.23-ENST00000448504.2	ARSG	896	930	1025	1233	1337	1688	1775	1216	-0.009618977	-0.012856409	-0.034781976	-0.08138898
ARSH_-_2924713.23-ENST00000381130.2|ARSH_-_2924710.23-ENST00000381130.2	ARSH	576	507	611	619	1511	2499	1795	1955	-0.034196203	-0.038222711	0.001608561	-0.008496785
ARSI_-_149682457.23-P1P2|ARSI_+_149682294.23-P1P2	ARSI	621	477	620	616	2234	3072	2506	2288	-0.054502739	-0.041097643	-0.02326032	-0.036235449
ARSJ_+_114900515.23-P1P2|ARSJ_+_114900753.23-P1P2	ARSJ	403	398	436	612	1533	2525	1637	1939	-0.017035098	0.009883563	0.001055869	0.004698665
ARSK_+_94890970.23-P1P2|ARSK_-_94891027.23-P1P2	ARSK	1122	1084	1275	1278	1256	2117	1425	1367	-0.020316292	-0.039795316	0.004155101	-0.028455866
ART1_-_3666414.23-P1P2|ART1_+_3666404.23-P1P2	ART1	436	389	388	535	876	1614	1116	1093	-0.032168908	0.007241048	0.01613337	-0.0251964
ART3_-_76995916.23-P1|ART3_+_76995900.23-P1	ART3	145	140	193	175	439	744	455	506	-0.020379472	-0.054536008	0.004811079	-0.005243469
ART3_+_76932405.23-P2|ART3_-_76932374.23-P2	ART3	537	491	505	846	1091	2021	1245	1648	-0.028523846	0.03600762	0.016873998	0.022164972
ART4_-_14996357.23-P1P2|ART4_+_14996362.23-P1P2	ART4	271	295	355	471	489	747	605	634	-0.002546788	0.001549119	-0.00915905	-0.014568783
ART5_+_3663184.23-P1P2|ART5_-_3663166.23-P1P2	ART5	1043	1237	1150	1466	1475	2248	1826	2123	0.010279203	-0.004283728	-0.00940817	0.001774547
ARTN_-_44399487.23-P1|ARTN_+_44399657.23-P1	ARTN	525	631	522	659	1480	2594	2058	2507	0.012243195	-0.005751551	0.009430331	0.009112212
ARTN_+_44401656.23-P2|ARTN_+_44401650.23-P2	ARTN	279	317	305	393	647	1088	857	876	0.003830998	-0.002779328	0.003801858	-0.018477137
ARV1_-_231114864.23-P1P2|ARV1_+_231114927.23-P1P2	ARV1	851	1111	1011	1597	1769	3008	1903	2362	0.024600306	0.027384006	0.005352934	0.012055792
ARVCF_-_19974634.23-P1|ARVCF_-_19974404.23-P1	ARVCF	1366	1285	1365	1833	1316	2122	1642	2037	-0.024297629	0.003406346	-0.001813956	0.011972414
ARVCF_-_20004313.23-P2|ARVCF_+_20004326.23-P2	ARVCF	1117	1560	1185	1499	1565	2884	2124	2299	0.034674726	-0.005423333	0.016189603	-0.009472576
ARX_+_25034044.23-P1|ARX_-_25033780.23-P1	ARX	694	542	728	979	809	1474	873	1029	-0.052034501	0.003593516	0.01462269	0.003915443
ARX_-_25031175.23-P2|ARX_+_25031186.23-P2	ARX	331	678	852	1335	1311	2186	1783	2077	0.091680728	0.026179523	0.002703471	0.002076936
AS3MT_+_104629429.23-P1P2|AS3MT_+_104629247.23-P1P2	AS3MT	405	514	524	757	641	1036	655	1047	0.020341636	0.014148587	-0.001540903	0.051781511
ASAH1_-_17941607.23-P1P2|ASAH1_-_17941563.23-P1P2	ASAH1	794	1240	817	995	1379	2264	1695	1928	0.051333732	-0.011039479	0.000615367	-0.0016704
ASAH2_-_52008322.23-ENST00000395526.4|ASAH2_-_52008325.23-ENST00000395526.4	ASAH2	503	538	540	777	723	1218	704	919	-0.005148132	0.013560588	0.004054034	0.01995377
ASAH2B_-_52499912.23-P1P2|ASAH2B_-_52499925.23-P1P2	ASAH2B	616	372	747	528	1316	2155	1278	1644	-0.090340306	-0.091348439	0.000265745	0.017670314
ASAP1_-_131455906.23-P1P2|ASAP1_-_131455855.23-P1P2	ASAP1	817	902	742	1123	2094	3160	2483	2008	-0.000410699	0.021046896	-0.010731548	-0.055313211
ASAP2_+_9346962.23-P1P2|ASAP2_-_9346995.23-P1P2	ASAP2	752	923	789	1011	1015	1934	1299	1354	0.015388249	-0.003535398	0.020670543	-0.01540385
ASAP3_-_23810622.23-P1P2|ASAP3_+_23810517.23-P1P2	ASAP3	839	953	943	1272	555	910	618	900	0.003830998	0.00405568	0.000383908	0.037137749
ASB1_-_239335714.23-P1P2|ASB1_-_239335717.23-P1P2	ASB1	897	953	849	1127	1547	2251	1829	2154	-0.00614065	0.001684642	-0.015650187	0.00379604
ASB10_-_150884783.23-P1P2|ASB10_-_150884821.23-P1P2	ASB10	599	646	577	866	1654	1963	1853	1957	-0.003911934	0.019792242	-0.043111649	-0.013336425
ASB11_+_15333577.23-P1|ASB11_+_15333701.23-P1	ASB11	334	144	416	698	354	571	333	641	-0.140238167	0.036214637	-0.001874975	0.080882296
ASB11_-_15332626.23-P2|ASB11_-_15332629.23-P2	ASB11	509	591	648	855	600	1036	647	607	0.007091867	0.000778904	0.007357069	-0.031947331
ASB12_+_63450511.23-ENST00000362002.2|ASB12_-_63450451.23-ENST00000362002.2	ASB12	401	267	287	141	479	843	550	934	-0.075730331	-0.144668863	0.009901891	0.061273665
ASB12_+_63445448.23-ENST00000396130.2|ASB12_-_63445141.23-ENST00000396130.2	ASB12	794	1126	1009	1139	701	1288	800	775	0.036942883	-0.02224505	0.015743081	-0.026911682
ASB13_+_5708362.23-P1P2|ASB13_+_5708331.23-P1P2	ASB13	555	664	725	777	1568	2473	1681	1823	0.011560762	-0.029916968	-0.004790487	-0.009171921
ASB14_+_57326672.23-P1P2|ASB14_-_57326679.23-P1P2	ASB14	289	269	349	648	792	1584	888	960	-0.025847411	0.051134563	0.027180534	-0.009670832
ASB15_+_123241932.23-P1P2|ASB15_-_123241904.23-P1P2	ASB15	215	183	317	482	442	800	479	687	-0.039121951	0.02163998	0.013667027	0.034715335
ASB16_-_42248115.23-P1P2|ASB16_-_42248108.23-P1P2	ASB16	437	416	514	591	778	1440	912	1175	-0.022513042	-0.019545643	0.016739883	0.017902591
ASB17_+_76398029.23-P1P2|ASB17_+_76398083.23-P1P2	ASB17	126	66	166	212	793	1428	812	1327	-0.110681987	-0.00417878	0.013040808	0.055277356
ASB18_-_237172801.23-P1P2|ASB18_-_237172983.23-P1P2	ASB18	842	977	983	1385	1554	2806	1746	1770	0.007009248	0.010492502	0.013444498	-0.019776438
ASB2_+_94442860.23-P1P2|ASB2_-_94442824.23-P1P2	ASB2	351	394	484	671	406	778	475	536	0.002037756	0.008062118	0.02133983	-0.002952456
ASB3_+_54087070.23-P1P2|ASB3_-_54087116.23-P1P2	ASB3	1765	2093	1965	2216	2921	4690	3940	3882	0.010267454	-0.022381636	-0.002366265	-0.024255679
ASB4_+_95115299.23-P1P2|ASB4_+_95115678.23-P1P2	ASB4	660	677	498	742	405	720	477	690	-0.011382764	0.018702067	0.011239362	0.036056767
ASB5_+_177190311.23-P1P2|ASB5_-_177190327.23-P1P2	ASB5	238	291	261	366	1304	2115	1543	1562	0.014737604	0.009674491	-0.001025097	-0.019998856
ASB6_+_132404367.23-P1P2|ASB6_-_132404356.23-P1P2	ASB6	228	232	222	179	930	650	1166	570	-0.012589042	-0.071807072	-0.114428223	-0.134381292
ASB7_-_101142768.23-P1P2|ASB7_-_101142815.23-P1P2	ASB7	433	422	419	689	1048	1473	1073	1485	-0.019009304	0.033239428	-0.020330515	0.029160914
ASB8_+_48551218.23-P1P2|ASB8_-_48551252.23-P1P2	ASB8	84	59	82	85	1084	1850	1283	1513	-0.067193876	-0.034893944	0.005827243	0.004000596
ASB9_+_15288172.23-P1P2|ASB9_+_15287888.23-P1P2	ASB9	771	699	702	666	555	845	628	811	-0.029796938	-0.04791272	-0.009596783	0.018253563
ASCC1_-_73975994.23-P1P2|ASCC1_-_73975670.23-P1P2	ASCC1	427	256	476	510	498	691	581	694	-0.091349372	-0.029964774	-0.022105246	0.005993379
ASCC2_+_30234208.23-P1P2|ASCC2_+_30234214.23-P1P2	ASCC2	889	1220	910	1339	1602	2966	1775	2419	0.032049013	0.016897523	0.016819827	0.026754736
ASCL1_-_103351499.23-P1P2|ASCL1_+_103351491.23-P1P2	ASCL1	1032	1191	1047	1249	1367	2157	1647	1763	0.006206158	-0.014088201	-0.004731937	-0.011221398
ASCL2_-_2292271.23-P1P2|ASCL2_-_2292240.23-P1P2	ASCL2	808	1082	889	996	1559	2574	1891	1940	0.028388109	-0.023360866	0.001380191	-0.017900383
ASCL3_-_8964516.23-P1P2|ASCL3_+_8964499.23-P1P2	ASCL3	188	244	125	191	658	897	711	968	0.023582093	0.022120119	-0.024469288	0.026563237
ASCL4_+_108168289.23-ENST00000342331.4|ASCL4_+_108168471.23-ENST00000342331.4	ASCL4	737	833	834	1236	977	1348	1141	1296	0.003088413	0.017951555	-0.022829381	-0.001899532
ASCL5_+_201096314.23-P1P2|ASCL5_+_201096304.23-P1P2	ASCL5	1142	1455	1169	1795	1442	2080	1769	1907	0.020972304	0.023205799	-0.016827354	-0.01011153
ASF1A_-_119215921.23-P1P2|ASF1A_+_119215456.23-P1P2	ASF1A	321	258	356	479	605	1067	679	889	-0.047691624	0.003618864	0.010211551	0.020418326
ASF1B_-_14247341.23-P1P2|ASF1B_+_14247360.23-P1P2	ASF1B	838	848	1082	861	1716	1881	2119	1319	-0.013405668	-0.073879476	-0.053820726	-0.096462472
ASGR1_-_7082627.23-P1P2|ASGR1_-_7082650.23-P1P2	ASGR1	1017	1008	1106	1458	2008	3415	2343	2531	-0.016501437	0.000669513	0.005380566	-0.009785137
ASGR2_-_7017962.23-P1P2|ASGR2_-_7017981.23-P1P2	ASGR2	621	605	512	807	1645	2910	1918	2185	-0.019067214	0.027008837	0.010681509	-0.001428119
ASH1L_+_155532507.23-P1P2|ASH1L_+_155532498.23-P1P2	ASH1L	698	782	778	1212	1447	2156	1618	1929	0.001773018	0.025317018	-0.012457363	0.005721191
ASH2L_-_37963059.23-P1P2|ASH2L_-_37963062.23-P1P2	ASH2L	126	110	127	219	563	824	641	723	-0.035285851	0.039914907	-0.014912094	-0.003011793
ASIC1_-_50451465.23-P1P2|ASIC1_+_50451752.23-P1P2	ASIC1	824	948	820	1621	455	909	511	782	0.005737212	0.060505069	0.026969567	0.04491101
ASIC2_-_32484240.23-ENST00000359872.6|ASIC2_-_32484256.23-ENST00000359872.6	ASIC2	1169	1446	1066	1548	2129	3194	2304	2925	0.016559409	0.014957659	-0.011522977	0.01560834
ASIC3_+_150748330.23-P1P2|ASIC3_-_150748335.23-P1P2	ASIC3	525	440	465	481	1242	1681	1443	1294	-0.041498617	-0.035152359	-0.025411864	-0.039057054
ASIC4_-_220379183.23-P1P2|ASIC4_+_220379356.23-P1P2	ASIC4	1282	1229	1310	2069	1028	1468	1184	1122	-0.021475709	0.027374269	-0.018193172	-0.030377717
ASIC5_-_156787409.23-P1P2|ASIC5_+_156787402.23-P1P2	ASIC5	451	425	583	905	456	897	567	728	-0.024022965	0.02476972	0.024884385	0.017338424
ASIP_-_32781974.23-P1P2|ASIP_-_32782578.23-P1P2	ASIP	854	894	893	1349	392	661	486	483	-0.008346712	0.020780989	0.004116219	-0.02289523
ASL_-_65540899.23-P1P2|ASL_+_65541008.23-P1P2	ASL	501	529	568	797	1424	2586	1549	1955	-0.0070691	0.009853471	0.014211194	0.014678693
ASMT_-_1734188.23-P1P2|ASMT_+_1734013.23-P1P2	ASMT	872	1299	1032	1305	488	660	580	818	0.044292502	-0.005479055	-0.025555379	0.032092775
ASMTL_-_1571721.23-P1P2|ASMTL_+_1571556.23-P1P2	ASMTL	595	447	672	819	1507	2420	1594	1987	-0.057806014	-0.010939837	-0.002363711	0.012729203
ASNA1_+_12848373.23-P1P2|ASNA1_-_12848537.23-P1P2	ASNA1	454	27	369	46	1441	304	1646	200	-0.43156939	-0.345141683	-0.275649381	-0.352847076
ASNS_+_97501749.23-P1P2|ASNS_-_97501690.23-P1P2	ASNS	1097	1003	1209	1554	1158	1587	1382	1237	-0.028541541	-0.003061751	-0.02373159	-0.039348351
ASNSD1_-_190526200.23-P1P2|ASNSD1_-_190526273.23-P1P2	ASNSD1	394	189	377	327	1290	2241	1442	1867	-0.124476784	-0.061114819	0.008227936	0.018690144
ASPA_+_3379320.23-P1P2|ASPA_+_3379511.23-P1P2	ASPA	576	419	500	731	871	1421	1012	1353	-0.062606055	0.015906027	-0.000255788	0.023725085
ASPDH_+_51017895.23-P1P2|ASPDH_-_51017868.23-P1P2	ASPDH	832	971	836	1123	924	1632	1125	1382	0.007872393	0.003437735	0.010443099	0.010420915
ASPG_+_104552082.23-P1|ASPG_+_104552087.23-P1	ASPG	574	660	519	754	1797	3426	2180	2474	0.005641389	0.014976927	0.020775216	-0.002027893
ASPG_+_104571288.23-P2|ASPG_+_104571259.23-P2	ASPG	704	824	654	836	392	645	486	515	0.008300038	-0.003899334	0.000817429	-0.012822818
ASPH_+_62627059.23-P1P2|ASPH_+_62627074.23-P1P2	ASPH	693	775	897	1094	1343	2083	1487	1564	0.001503985	-0.010824457	-0.007050114	-0.013985431
ASPHD1_-_29911917.23-P1P2|ASPHD1_-_29911974.23-P1P2	ASPHD1	897	1101	971	963	2020	3113	2094	2418	0.015397969	-0.041364076	-0.007902685	0.000700762
ASPHD2_-_26825273.23-P1P2|ASPHD2_-_26825290.23-P1P2	ASPHD2	814	1064	979	1322	1634	2934	1633	2287	0.024781467	0.004218155	0.012692664	0.031040843
ASPM_+_197115513.23-P1P2|ASPM_-_197115391.23-P1P2	ASPM	867	897	891	1536	1151	1300	1158	986	-0.010100631	0.040288046	-0.049792347	-0.047196632
ASPN_+_95244763.23-P1P2|ASPN_+_95244720.23-P1P2	ASPN	594	541	596	610	725	1231	756	1164	-0.029108625	-0.036716062	0.005112378	0.045902968
ASPRV1_+_70188959.23-ENST00000320256.4|ASPRV1_-_70189027.23-ENST00000320256.4	ASPRV1	313	345	248	350	565	947	713	834	-0.000681679	0.010608101	0.003348285	0.002706389
ASPSCR1_-_79935528.23-P1P2|ASPSCR1_-_79935518.23-P1P2	ASPSCR1	628	724	767	1077	1018	1718	1011	1090	0.006038145	0.009978355	0.004313751	-0.010097353
ASRGL1_+_62105004.23-P1P2|ASRGL1_-_62104973.23-P1P2	ASRGL1	782	972	821	850	653	1215	959	1065	0.017270704	-0.035017365	0.017431993	-0.005445301
ASS1_-_133320387.23-P1P2|ASS1_+_133320409.23-P1P2	ASS1	536	655	562	795	1774	2633	2149	2292	0.014718554	0.011049517	-0.012974022	-0.01179224
ASTE1_+_130745613.23-P1P2|ASTE1_+_130745639.23-P1P2	ASTE1	1024	986	1010	1298	1832	3248	1995	2363	-0.020817227	-0.003091371	0.010984168	0.00469834
ASTL_+_96804167.23-ENST00000342380.2|ASTL_+_96804158.23-ENST00000342380.2	ASTL	785	935	819	1113	1017	1557	1099	1334	0.010909598	0.005149918	-0.008813148	0.008538896
ASTN1_+_177133808.23-P1P2|ASTN1_+_177133827.23-P1P2	ASTN1	759	983	876	1168	1647	2518	1909	1670	0.023402319	0.00233975	-0.008983503	-0.042954792
ASTN2_-_120177339.23-P1P2|ASTN2_-_120177334.23-P1P2	ASTN2	645	568	775	1128	1071	1738	1164	1389	-0.034130229	0.015279376	-0.000963115	0.005858276
ASUN_-_27090898.23-P1P2|ASUN_+_27090863.23-P1P2	ASUN	521	230	569	383	809	635	975	450	-0.136930585	-0.098529286	-0.098799393	-0.143379308
ASXL1_+_30946335.23-P1P2|ASXL1_-_30946176.23-P1P2	ASXL1	486	497	491	594	2164	3097	2666	2402	-0.011839392	-0.012044966	-0.017877405	-0.038322324
ASXL2_+_26101313.23-P1P2|ASXL2_+_26100928.23-P1P2	ASXL2	339	300	392	609	291	557	310	389	-0.033370989	0.024845257	0.021125084	0.013688659
ASXL3_-_31158240.23-P1P2|ASXL3_-_31158223.23-P1P2	ASXL3	811	904	1039	1024	2115	3568	2719	2544	0.00101921	-0.042289942	0.004291768	-0.032385554
ASZ1_+_117067530.23-P1P2|ASZ1_+_117067548.23-P1P2	ASZ1	484	442	580	693	1472	2524	1797	2426	-0.028702955	-0.013872205	0.006473607	0.025272252
ATAD1_+_89577892.23-P1P2|ATAD1_-_89577928.23-P1P2	ATAD1	238	321	285	449	447	809	615	762	0.029343434	0.02685652	0.013660263	0.011746801
ATAD2_+_124408604.23-P1P2|ATAD2_-_124408650.23-P1P2	ATAD2	670	787	820	953	1786	2972	2044	2526	0.00882923	-0.017949096	0.002441259	0.011372986
ATAD2B_+_24149925.23-P1P2|ATAD2B_+_24149936.23-P1P2	ATAD2B	672	864	1051	1311	982	1720	1206	1468	0.022308606	-0.007495615	0.009320133	0.008983008
ATAD3A_+_1448130.23-P1P2|ATAD3A_-_1448112.23-P1P2	ATAD3A	320	15	428	90	726	777	709	408	-0.463045754	-0.269347276	-0.057050801	-0.108697134
ATAD3B_+_1407208.23-P1|ATAD3B_+_1407150.23-P1	ATAD3B	758	755	780	1238	943	1543	1197	1130	-0.015766682	0.028072901	0.000145386	-0.030977483
ATAD3C_-_1397877.23-P1P2|ATAD3C_-_1398044.23-P1P2	ATAD3C	574	578	657	922	794	1481	864	1143	-0.014139866	0.009882464	0.017781339	0.02205894
ATAD5_-_29159373.23-P1P2|ATAD5_+_29159022.23-P1P2	ATAD5	635	439	737	423	1203	1338	1410	1137	-0.070198317	-0.122064218	-0.051863345	-0.055752668
ATAT1_-_30594710.23-P1P2|ATAT1_-_30594683.23-P1P2	ATAT1	507	757	592	828	1401	1964	1611	1670	0.044593877	0.0093801	-0.020674336	-0.016267672
ATCAY_-_3880723.23-P1P2|ATCAY_-_3880720.23-P1P2	ATCAY	655	524	608	773	1229	2002	1456	1576	-0.048444191	-0.004702754	-0.000444323	-0.009471402
ATE1_+_123687896.23-P1P2|ATE1_+_123687521.23-P1P2	ATE1	895	1224	965	1278	1653	2426	1639	1885	0.031534018	0.001345384	-0.014490045	6.54E-05
ATF1_-_51158152.23-P1P2|ATF1_+_51157878.23-P1P2	ATF1	750	717	775	1292	1917	3058	2176	2815	-0.02188629	0.035328227	-0.003252427	0.018568309
ATF2_-_176032440.23-P1P2|ATF2_+_176032892.23-P1P2	ATF2	764	744	695	807	192	248	163	103	-0.019131658	-0.018086294	-0.03184238	-0.093581987
ATF3_+_212782164.23-P1P2|ATF3_+_212782151.23-P1P2	ATF3	749	1350	812	1015	1533	2448	1891	1986	0.072719739	-0.007194372	-0.003118137	-0.014215349
ATF4_-_39916548.23-P1P2|ATF4_-_39917038.23-P1P2	ATF4	292	70	287	63	272	207	288	201	-0.226873937	-0.262470822	-0.10285755	-0.0782714
ATF6_+_161736292.23-P1P2|ATF6_+_161736178.23-P1P2	ATF6	1080	1047	1209	1196	918	1756	1099	1129	-0.019805414	-0.041739151	0.021188698	-0.017689781
ATF6B_-_32095947.23-P1P2|ATF6B_+_32095825.23-P1P2	ATF6B	668	622	548	881	666	945	743	829	-0.025814342	0.02993671	-0.019075228	-0.00471383
ATF7_+_54019710.23-P1P2|ATF7_+_54019638.23-P1P2	ATF7	288	248	340	382	1040	1505	1257	1152	-0.037424042	-0.022973111	-0.016402491	-0.035635109
ATF7IP_-_14518605.23-P1|ATF7IP_-_14518679.23-P1	ATF7IP	672	668	681	859	1156	1868	1220	1108	-0.016065506	-0.005863248	-0.001530902	-0.037059801
ATF7IP_-_14538334.23-P2|ATF7IP_-_14538285.23-P2	ATF7IP	483	506	368	507	1480	2464	1731	2039	-0.008241594	0.007112445	0.002500715	0.003827228
ATF7IP2_-_10479940.23-P1P2|ATF7IP2_-_10479924.23-P1P2	ATF7IP2	289	273	466	432	1088	1927	1318	1441	-0.023651087	-0.051316162	0.010826424	-0.007896176
ATG10_+_81267917.23-P1P2|ATG10_-_81267907.23-P1P2	ATG10	222	255	216	431	227	354	240	258	0.00543557	0.061633817	-0.006492818	-0.010590576
ATG12_-_115177215.23-P1P2|ATG12_-_115177477.23-P1P2	ATG12	1248	1570	1169	1560	310	607	490	627	0.019080456	0.002476618	0.024196111	0.016794656
ATG13_-_46639118.23-P1P2|ATG13_-_46639144.23-P1P2	ATG13	381	521	404	483	904	1452	1225	1316	0.03145804	-0.01380175	-0.002356388	-0.01065847
ATG14_+_55878313.23-P1P2|ATG14_-_55878514.23-P1P2	ATG14	1189	1712	1111	1563	1836	3276	2219	2991	0.039230961	0.010275974	0.011847261	0.025029003
ATG16L1_+_234160346.23-P1P2|ATG16L1_-_234160341.23-P1P2	ATG16L1	1367	1482	1325	1859	1073	2034	1227	1505	-0.003120303	0.00988029	0.019979107	0.010182843
ATG16L2_-_72525477.23-P1P2|ATG16L2_-_72525493.23-P1P2	ATG16L2	1059	1447	1069	1645	1546	2635	1864	2016	0.031408369	0.023520832	0.00566531	-0.00959641
ATG2A_-_64684556.23-P1P2|ATG2A_-_64684666.23-P1P2	ATG2A	630	896	557	950	980	2006	1087	1428	0.03735771	0.038667008	0.030323104	0.020969773
ATG2B_-_96829681.23-P1P2|ATG2B_+_96829705.23-P1P2	ATG2B	442	604	422	572	1145	2282	1279	1307	0.031370181	0.004722055	0.02673509	-0.018518627
ATG3_-_112280679.23-P1P2|ATG3_-_112280503.23-P1P2	ATG3	687	965	741	1106	1267	2413	1543	1486	0.035509537	0.018993229	0.020617997	-0.027841073
ATG4A_+_107335009.23-P1P2|ATG4A_-_107335240.23-P1P2	ATG4A	588	682	650	1012	575	996	641	787	0.006938452	0.02521665	0.007781901	0.010314918
ATG4B_+_242577150.23-P1P2|ATG4B_+_242577182.23-P1P2	ATG4B	883	1046	876	1175	1524	2405	2044	1872	0.010098413	0.003222243	-0.004713174	-0.035745309
ATG4C_-_63249832.23-P1P2|ATG4C_+_63249892.23-P1P2	ATG4C	864	773	884	1170	2307	3511	2678	2880	-0.031776301	0.001250153	-0.009589602	-0.010486309
ATG4D_-_10654651.23-P1P2|ATG4D_-_10654604.23-P1P2	ATG4D	722	974	869	1084	1718	2525	1841	1981	0.029483859	-0.007498205	-0.014296567	-0.010398106
ATG5_+_106773313.23-P1P2|ATG5_+_106773494.23-P1P2	ATG5	725	631	777	1283	1039	1549	1111	1690	-0.035883798	0.033915259	-0.012390063	0.044022392
ATG7_-_11314095.23-P1P2|ATG7_-_11314116.23-P1P2	ATG7	747	859	909	1059	1183	1748	1567	1691	0.005663136	-0.017588566	-0.013588519	-0.009948804
ATG9A_-_220093869.23-P1P2|ATG9A_+_220094211.23-P1P2	ATG9A	778	920	859	1143	1542	2572	1854	2292	0.00983285	0.002037732	0.002752807	0.011426677
ATG9B_-_150721519.23-P1P2|ATG9B_-_150721533.23-P1P2	ATG9B	516	495	528	773	1045	1285	1252	1444	-0.021368184	0.016114306	-0.038341174	0.000506929
ATHL1_-_289141.23-P1P2|ATHL1_+_289204.23-P1P2	ATHL1	675	728	557	759	1736	2486	1969	2298	-0.003902374	0.005527057	-0.017799028	0.002374733
ATIC_+_216176831.23-P1P2|ATIC_+_216177046.23-P1P2	ATIC	265	1	301	1	910	77	963	83	-0.745535707	-0.78178227	-0.397585363	-0.405845851
ATL1_-_51026934.23-P1P2|ATL1_+_51026923.23-P1P2	ATL1	669	861	709	1156	1891	2852	2167	2011	0.022456964	0.032039725	-0.010812215	-0.033671645
ATL2_+_38604354.23-P1P2|ATL2_+_38604390.23-P1P2	ATL2	512	118	458	175	1484	1081	1797	664	-0.233394384	-0.181834933	-0.108880448	-0.178407995
ATL3_-_63439002.23-P1P2|ATL3_-_63438854.23-P1P2	ATL3	431	343	447	477	484	678	590	570	-0.049194125	-0.030561305	-0.020825377	-0.027339359
ATM_-_108093813.23-P1P2|ATM_-_108093795.23-P1P2	ATM	683	755	771	1266	844	1099	891	884	-0.000228011	0.033089503	-0.030633465	-0.023162573
ATMIN_+_81069685.23-P1P2|ATMIN_+_81069661.23-P1P2	ATMIN	590	634	653	696	1190	1597	1400	1443	-0.004450728	-0.030729733	-0.026557417	-0.01716693
ATN1_+_7036968.23-P1P2|ATN1_+_7037039.23-P1P2	ATN1	391	671	449	458	1551	2577	2023	2235	0.065322472	-0.037215273	0.002230406	-0.006251215
ATOH1_+_94750042.23-P1P2|ATOH1_-_94749954.23-P1P2	ATOH1	971	1247	938	1258	1009	1575	1093	1359	0.022152921	0.003206045	-0.006200572	0.012318362
ATOH7_-_69991496.23-P1P2|ATOH7_+_69991516.23-P1P2	ATOH7	842	1098	911	1113	1476	2481	1704	1883	0.024430057	-0.010568311	0.00379205	-0.006216719
ATOH8_-_85981251.23-P1P2|ATOH8_-_85981376.23-P1P2	ATOH8	759	822	878	1297	1279	2117	1517	1803	-0.00328152	0.017475932	0.00171032	0.005233698
ATOX1_-_151137767.23-P1P2|ATOX1_+_151137709.23-P1P2	ATOX1	669	249	813	262	799	167	832	235	-0.162404296	-0.207147153	-0.276616554	-0.220345057
ATP10A_+_26108493.23-P1P2|ATP10A_+_26108418.23-P1P2	ATP10A	1191	1536	1153	1479	2280	3052	2450	2460	0.022788865	-0.003364372	-0.02688759	-0.021282482
ATP10B_+_160279194.23-P1P2|ATP10B_+_160278964.23-P1P2	ATP10B	273	235	344	410	368	516	470	582	-0.037472208	-0.014267232	-0.020721018	0.011639508
ATP10D_+_47487444.23-P1P2|ATP10D_+_47487367.23-P1P2	ATP10D	480	532	523	863	663	1190	696	867	0.000155915	0.033778103	0.012585038	0.012595622
ATP11A_-_113344323.23-P1P2|ATP11A_+_113344507.23-P1P2	ATP11A	839	1231	993	1334	1805	2696	1980	1850	0.042023657	0.003456124	-0.012121563	-0.032601802
ATP11B_+_182511382.23-P1P2|ATP11B_-_182511533.23-P1P2	ATP11B	629	55	572	30	1649	259	2312	61	-0.376650683	-0.471309963	-0.315340267	-0.591318187
ATP11C_-_138914378.23-ENST00000361648.2|ATP11C_-_138914367.23-ENST00000361648.2	ATP11C	209	155	243	339	537	1038	600	921	-0.059568923	0.008899937	0.022547591	0.045405368
ATP12A_+_25254566.23-P1P2|ATP12A_+_25254562.23-P1P2	ATP12A	661	609	700	926	858	1429	1056	1357	-0.027392802	0.001164414	0.002525865	0.017499844
ATP13A1_-_19774270.23-P1P2|ATP13A1_-_19774415.23-P1P2	ATP13A1	261	322	313	274	714	958	727	821	0.016084354	-0.059746225	-0.026604746	-0.002817295
ATP13A2_-_17338380.23-P1P2|ATP13A2_+_17338415.23-P1P2	ATP13A2	915	938	985	1312	1959	3119	2386	2746	-0.011471526	0.00219438	-0.00351084	0.000177078
ATP13A3_-_194207568.23-P1P2|ATP13A3_-_194207695.23-P1P2	ATP13A3	1375	2045	1462	2098	1323	2645	1568	2031	0.044071757	0.013215387	0.027163699	0.018759053
ATP13A4_+_193272611.23-P1P2|ATP13A4_+_193272617.23-P1P2	ATP13A4	487	585	555	726	362	762	442	517	0.012156006	-0.000504071	0.033967771	0.002683845
ATP13A5_+_193096393.23-P1P2|ATP13A5_+_193096510.23-P1P2	ATP13A5	505	543	530	502	917	1364	1034	1164	-0.004360583	-0.048149967	-0.012703128	-0.003308108
ATP1A2_+_160085566.23-P1|ATP1A2_+_160085574.23-P1	ATP1A2	911	456	525	1533	1726	2675	2038	2093	-0.118367718	0.118071061	-0.007144703	-0.017735537
ATP1A2_-_160098352.23-P2|ATP1A2_+_160098236.23-P2	ATP1A2	465	405	518	736	565	913	691	913	-0.035760116	0.011694658	-0.001576285	0.021852518
ATP1A3_+_42498357.23-P1P2|ATP1A3_+_42498353.23-P1P2	ATP1A3	347	338	399	418	415	659	516	566	-0.019088461	-0.033282784	-0.003960361	-0.007399137
ATP1A4_+_160147246.23-P1|ATP1A4_+_160147240.23-P1	ATP1A4	306	344	382	812	735	1149	923	852	0.002253127	0.071118928	-0.006018894	-0.034501815
ATP1A4_+_160121443.23-P2|ATP1A4_+_160121435.23-P2	ATP1A4	477	449	434	550	1230	2258	1418	1510	-0.024190281	-0.005200133	0.015663098	-0.012039855
ATP1B1_-_169075945.23-P1P2|ATP1B1_-_169075993.23-P1P2	ATP1B1	914	1177	853	1055	1395	2220	1754	1801	0.022557287	-0.008759053	-0.003583916	-0.017765164
ATP1B2_-_7554273.23-P1P2|ATP1B2_-_7554254.23-P1P2	ATP1B2	449	535	485	620	1284	498	1490	1594	0.010943634	-0.003909146	-0.193730373	-0.01131498
ATP1B3_-_141595462.23-P1P2|ATP1B3_+_141595611.23-P1P2	ATP1B3	738	404	661	387	1035	2080	1247	1481	-0.104994302	-0.119115244	0.027849963	0.005113738
ATP1B4_+_119495941.23-P1P2|ATP1B4_+_119495968.23-P1P2	ATP1B4	349	385	519	658	1041	1670	1294	1445	-0.000553475	-0.005125346	-0.002514196	-0.004571329
ATP2A1_-_28889826.23-P1P2|ATP2A1_-_28889833.23-P1P2	ATP2A1	883	1239	1038	1446	1509	1650	1771	2082	0.035365357	0.008819575	-0.054155774	0.00351687
ATP2A2_+_110719114.23-P1P2|ATP2A2_+_110719087.23-P1P2	ATP2A2	597	510	678	455	1565	1354	2084	1206	-0.038655765	-0.09899262	-0.085705581	-0.107923255
ATP2A3_-_3867723.23-P1P2|ATP2A3_+_3867694.23-P1P2	ATP2A3	95	119	72	77	1629	2437	1353	1704	0.018150683	-0.030349647	-0.011909551	0.014341272
ATP2B1_+_90102587.23-P1P2|ATP2B1_+_90102595.23-P1P2	ATP2B1	520	700	459	669	1360	2244	1569	1495	0.02914478	0.015444366	0.001288787	-0.029518966
ATP2B2_-_10547214.23-P1|ATP2B2_+_10547196.23-P1	ATP2B2	170	177	163	219	1586	2484	1679	1741	-0.009183394	0.003280481	-0.00573034	-0.016221499
ATP2B2_+_10749772.23-P2|ATP2B2_+_10749781.23-P2	ATP2B2	936	837	863	929	2355	3658	2909	3137	-0.031852102	-0.029261354	-0.006836307	-0.010055435
ATP2B3_+_152783182.23-P1P2|ATP2B3_+_152783139.23-P1P2	ATP2B3	842	1017	841	857	1095	1940	1293	1387	0.012995914	-0.037359918	0.010868595	-0.010890358
ATP2B4_-_203595955.23-P1P2|ATP2B4_+_203595956.23-P1P2	ATP2B4	401	384	523	538	676	1148	791	1123	-0.021628318	-0.035970467	0.005130159	0.033155416
ATP2C1_+_130613389.23-P1P2|ATP2C1_+_130613095.23-P1P2	ATP2C1	331	156	499	176	985	342	1108	135	-0.127019791	-0.19364436	-0.208564246	-0.352084552
ATP2C2_-_84402154.23-P1P2|ATP2C2_-_84402192.23-P1P2	ATP2C2	412	522	406	512	1082	1943	1338	1464	0.020090752	-0.005928298	0.012685665	-0.007774246
ATP4A_+_36054525.23-P1|ATP4A_+_36054542.23-P1	ATP4A	1087	1019	1042	1293	1692	2593	1916	2174	-0.024813861	-0.008267598	-0.008659986	-0.00205774
ATP4A_-_36048687.23-P2|ATP4A_+_36048719.23-P2	ATP4A	948	923	964	704	1289	2207	1653	1889	-0.019162291	-0.086546711	0.006272033	-0.000938663
ATP4B_+_114312452.23-P1P2|ATP4B_+_114312468.23-P1P2	ATP4B	923	1188	1019	1135	1155	2159	1363	1243	0.022483588	-0.024220957	0.018096407	-0.036411308
ATP5A1_-_43678159.23-P1|ATP5A1_+_43678210.23-P1	ATP5A1	524	16	458	81	1362	447	1592	428	-0.527464107	-0.294732434	-0.216212456	-0.228324019
ATP5C1_+_7830168.23-P1P2|ATP5C1_-_7830158.23-P1P2	ATP5C1	580	69	569	89	1166	194	1055	171	-0.331232281	-0.312987216	-0.307431485	-0.307433359
ATP5D_+_1241904.23-P1P2|ATP5D_+_1241964.23-P1P2	ATP5D	601	163	545	176	1519	1940	1767	1559	-0.209385111	-0.206653874	-0.033227062	-0.041614698
ATP5E_-_57607352.23-P1P2|ATP5E_+_57607367.23-P1P2	ATP5E	390	27	299	14	785	159	1031	106	-0.408929852	-0.482962942	-0.280814557	-0.378494526
ATP5G1_-_46970249.23-P1P2|ATP5G1_-_46970159.23-P1P2	ATP5G1	1305	1619	1274	2151	1228	2240	1548	1880	0.017002735	0.037232645	0.01480368	0.008629026
ATP5G2_-_54069813.23-P1P2|ATP5G2_-_54069695.23-P1P2	ATP5G2	256	319	350	699	2070	3845	2697	3243	0.017568431	0.061894844	0.017268491	0.007071858
ATP5G3_-_176046397.23-P1P2|ATP5G3_+_176046225.23-P1P2	ATP5G3	651	751	731	929	376	566	356	434	0.006135424	-0.004754421	-0.011165808	0.009166498
ATP5H_+_73043037.23-P1P2|ATP5H_+_73042983.23-P1P2	ATP5H	346	5	351	11	1053	285	1246	165	-0.621161682	-0.539575752	-0.24206039	-0.339175666
ATP5I_-_668029.23-P1P2|ATP5I_+_668023.23-P1P2	ATP5I	630	138	674	180	907	215	1266	229	-0.24111259	-0.234701642	-0.259805546	-0.290375714
ATP5J_+_27107880.23-P1P2|ATP5J_+_27107938.23-P1P2	ATP5J	654	266	651	305	2311	2503	2880	2240	-0.149197481	-0.151960095	-0.055435999	-0.061446189
ATP5J2_+_99063727.23-P1P2|ATP5J2_-_99063736.23-P1P2	ATP5J2	480	122	616	189	1207	368	1422	419	-0.218837586	-0.214248083	-0.226092158	-0.213905013
ATP5J2-PTCD1_-_99036346.23-P2|ATP5J2-PTCD1_-_99036387.23-P2	ATP5J2-PTCD1	448	23	469	24	3242	642	3992	587	-0.452608865	-0.473816698	-0.284364181	-0.32329548
ATP5L_+_118272718.23-P1P2|ATP5L_+_118272598.23-P1P2	ATP5L	625	254	655	220	895	297	806	217	-0.149302061	-0.200967179	-0.214621006	-0.227838067
ATP5L2_+_43036328.23-ENST00000505920.1|ATP5L2_-_43036335.23-ENST00000505920.1	ATP5L2	821	513	705	683	1172	2158	1569	2071	-0.085296328	-0.044821934	0.016065596	0.021725726
ATP5O_-_35288080.23-P1P2|ATP5O_-_35288102.23-P1P2	ATP5O	798	225	885	359	1117	323	1503	270	-0.203774868	-0.173268444	-0.233188115	-0.29154573
ATP5S_+_50779479.23-P1P2|ATP5S_+_50779095.23-P1P2	ATP5S	621	550	691	623	327	1261	1099	967	-0.03327689	-0.05543199	0.115484657	-0.042034799
ATP5SL_-_41945747.23-P1P2|ATP5SL_+_41945774.23-P1P2	ATP5SL	1014	327	878	479	1369	1217	1619	1024	-0.183882454	-0.129571617	-0.082048609	-0.093937235
ATP6AP1_-_153657070.23-P1P2|ATP6AP1_-_153657002.23-P1P2	ATP6AP1	489	32	428	21	1080	136	1295	66	-0.418098998	-0.479220537	-0.344708139	-0.487982045
ATP6AP1L_-_81575697.23-P1P2|ATP6AP1L_-_81575610.23-P1P2	ATP6AP1L	543	605	583	668	914	1404	1033	1249	0.000943959	-0.020056596	-0.008367465	0.007923378
ATP6AP2_+_40440259.23-P1P2|ATP6AP2_+_40440280.23-P1P2	ATP6AP2	647	198	595	118	1977	673	2185	474	-0.191492534	-0.278293133	-0.211353298	-0.262085989
ATP6V0A1_-_40610927.23-P1P2|ATP6V0A1_+_40610918.23-P1P2	ATP6V0A1	687	934	704	797	1187	1688	1412	1205	0.03063823	-0.021826304	-0.018749894	-0.046844721
ATP6V0A2_-_124196959.23-P1P2|ATP6V0A2_-_124196923.23-P1P2	ATP6V0A2	531	642	658	1032	2427	3675	2774	3168	0.013126293	0.026301195	-0.010270095	-0.001035403
ATP6V0A4_+_138458656.23-P1|ATP6V0A4_+_138458660.23-P1	ATP6V0A4	613	759	713	921	1041	1614	1161	1243	0.016684085	-0.002351183	-0.007110231	-0.011194997
ATP6V0A4_+_138482908.23-P2|ATP6V0A4_+_138482911.23-P2	ATP6V0A4	1048	1555	1264	1498	1405	2312	1766	1933	0.043709615	-0.015054018	0.000926198	-0.007715243
ATP6V0B_+_44440710.23-P1P2|ATP6V0B_-_44440640.23-P1P2	ATP6V0B	476	123	459	198	1556	2794	1409	1891	-0.216381122	-0.164001603	0.01269355	0.024338319
ATP6V0C_+_2564168.23-P1P2|ATP6V0C_+_2564165.23-P1P2	ATP6V0C	379	227	496	159	1460	498	1644	394	-0.091465641	-0.207680755	-0.211037646	-0.246368327
ATP6V0D1_-_67515053.23-P1P2|ATP6V0D1_-_67515028.23-P1P2	ATP6V0D1	1074	418	1180	500	1407	936	1829	941	-0.155890995	-0.1668972	-0.121101377	-0.126399043
ATP6V0D2_+_87111202.23-P1P2|ATP6V0D2_-_87111152.23-P1P2	ATP6V0D2	723	681	688	941	1492	2741	2038	2241	-0.024100461	0.006089432	0.015771593	-0.00699128
ATP6V0E1_-_172411000.23-P1P2|ATP6V0E1_-_172410857.23-P1P2	ATP6V0E1	805	995	785	1047	1532	2556	1693	1702	0.01643617	0.002381894	0.002788421	-0.02108942
ATP6V0E2_+_149571079.23-P1P2|ATP6V0E2_-_149571160.23-P1P2	ATP6V0E2	788	955	829	1245	1380	2267	1613	1603	0.013498222	0.019910923	0.000696165	-0.02290087
ATP6V1B1_-_71163062.23-P1P2|ATP6V1B1_-_71163238.23-P1P2	ATP6V1B1	1112	1646	1327	1452	1201	2319	1459	1517	0.043353464	-0.026845355	0.022470052	-0.015794015
ATP6V1C2_+_10861821.23-P1P2|ATP6V1C2_-_10862143.23-P1P2	ATP6V1C2	508	803	575	727	1713	2904	2102	2610	0.053099104	-0.00552465	0.004945112	0.012117674
ATP6V1D_+_67826485.23-P1P2|ATP6V1D_+_67826497.23-P1P2	ATP6V1D	888	818	991	1149	1530	2132	1705	1539	-0.027423651	-0.018295941	-0.021481185	-0.038028553
ATP6V1E1_+_18111483.23-P1P2|ATP6V1E1_-_18111500.23-P1P2	ATP6V1E1	181	27	220	91	644	278	706	240	-0.294723832	-0.169685535	-0.179186205	-0.19124445
ATP6V1E2_-_46769671.23-P1P2|ATP6V1E2_+_46769509.23-P1P2	ATP6V1E2	815	1108	777	909	3581	6335	4419	4882	0.030644494	-0.016976827	0.01070548	-0.006250069
ATP6V1F_-_128502898.23-P1P2|ATP6V1F_+_128503227.23-P1P2	ATP6V1F	654	93	719	86	1844	2468	2237	2093	-0.305109187	-0.352530719	-0.026911433	-0.032386383
ATP6V1G1_+_117350079.23-P1P2|ATP6V1G1_-_117350067.23-P1P2	ATP6V1G1	844	51	873	42	1429	175	1587	98	-0.43156939	-0.485349891	-0.348656651	-0.458524876
ATP6V1G2_-_31514322.23-P1P2|ATP6V1G2_+_31514126.23-P1P2	ATP6V1G2	650	743	744	1179	623	1151	645	865	0.004767348	0.027836507	0.016473311	0.024187385
ATP6V1G3_-_198509781.23-P1P2|ATP6V1G3_-_198509802.23-P1P2	ATP6V1G3	468	452	551	628	334	553	367	465	-0.020359148	-0.020840007	0.001632385	0.015222427
ATP6V1H_-_54755805.23-P1P2|ATP6V1H_-_54755777.23-P1P2	ATP6V1H	469	31	568	31	1113	412	1353	457	-0.416470957	-0.465581461	-0.199980739	-0.192458318
ATP7A_+_77166215.23-P1P2|ATP7A_+_77166283.23-P1P2	ATP7A	908	903	1050	1296	649	875	727	844	-0.015998967	-0.009054755	-0.025959552	0.001524357
ATP7B_+_52586109.23-P1P2|ATP7B_+_52586074.23-P1P2	ATP7B	329	100	396	101	816	835	832	812	-0.191998264	-0.241020499	-0.063092663	-0.02574653
ATP8A1_-_42659065.23-P1P2|ATP8A1_-_42659112.23-P1P2	ATP8A1	921	968	781	792	1573	2184	1911	1636	-0.00774975	-0.03807766	-0.021968282	-0.046353625
ATP8A2_-_25946184.23-P1P2|ATP8A2_-_25946360.23-P1P2	ATP8A2	399	384	492	523	610	927	644	789	-0.020883442	-0.031128182	-0.009841676	0.009980257
ATP8B1_+_55470527.23-P1P2|ATP8B1_-_55470587.23-P1P2	ATP8B1	1170	1694	1322	1421	1695	2538	2027	1997	0.040057112	-0.029475596	-0.011788237	-0.024267787
ATP8B2_-_154298056.23-P1|ATP8B2_-_154301762.23-P2	ATP8B2	456	146	491	343	1388	1683	1793	1328	-0.184572516	-0.093036882	-0.040225497	-0.069124681
ATP8B3_-_1812230.23-P1P2|ATP8B3_-_1812227.23-P1P2	ATP8B3	501	584	399	542	1520	2266	1964	2081	0.007676684	0.005037088	-0.012382628	-0.012823749
ATP8B4_-_50411385.23-P1P2|ATP8B4_+_50411389.23-P1P2	ATP8B4	964	1232	1079	1179	972	1756	940	1267	0.021426445	-0.027052733	0.013490105	0.02500039
ATP9A_+_50384863.23-P1P2|ATP9A_+_50384859.23-P1P2	ATP9A	789	1039	1077	1442	1833	2875	1962	2118	0.025886798	0.002963515	-0.005531619	-0.009892162
ATP9B_-_76829452.23-P1P2|ATP9B_+_76829480.23-P1P2	ATP9B	1068	1414	1326	1484	1353	2149	1572	1814	0.026702661	-0.023513899	-0.003845742	0.000590659
ATPAF1_+_47133920.23-P1P2|ATPAF1_-_47134124.23-P1P2	ATPAF1	536	599	618	1098	1198	1799	1441	1922	0.001392124	0.044712075	-0.011410571	0.023364565
ATPAF2_+_17942476.23-P1P2|ATPAF2_+_17942446.23-P1P2	ATPAF2	664	505	729	415	1816	2395	2106	1827	-0.055984415	-0.123268766	-0.028896156	-0.044270314
ATPIF1_-_28562890.23-P1P2|ATPIF1_-_28562775.23-P1P2	ATPIF1	494	587	450	689	1426	2608	1686	2081	0.010537798	0.022712983	0.015163855	0.011175088
ATRAID_-_27435226.23-P1P2|ATRAID_-_27435232.23-P1P2	ATRAID	518	657	603	828	1779	2700	2178	2224	0.020265067	0.006663251	-0.009966538	-0.018636357
ATRIP_-_48488199.23-P1P2|ATRIP_-_48488160.23-P1P2	ATRIP	447	4	509	7	1738	187	2105	207	-0.686544444	-0.654317997	-0.366141283	-0.3861379
ATRN_-_3451695.23-P1P2|ATRN_+_3451744.23-P1P2	ATRN	863	1012	961	1153	1035	2051	1196	1252	0.008585762	-0.013243421	0.025957792	-0.014729692
[truncated: 19,379 more rows]
