# Supplementary material for: Maximizing CRISPRi efficacy and accessibility with dual-sgRNA libraries and optimal effectors
Source: eLife. 2022 Dec 28;11:e81856. doi: 10.7554/eLife.81856 (PMC9829409; doi:10.7554/eLife.81856)
Supplement: Supplementary file 3. [file elife-81856-supp3.xlsx]

## Sheet: gene discriminant scores
	ATF6_inhibitor_sensitivity.gamma	ATF6_inhibitor_sensitivity.rho.treated	CRISPRi_v2_test_screens.gamma	CRISPRi_v2_test_screens.rho.treated_CTx-DTA	CRISPRi_v2_test_screens.rho.treated_HHT	CRISPRi_v2_test_screens.rho.treated_Tm	CSN5i_sensitivity.gamma	CSN5i_sensitivity.rho.treated	ERSE_tunicamycin_FACS.epsilon	RQC_reporter_FACS.epsilon	UPR_reporter_FACS.epsilon	allelic_series_growth_screen_and_sensitivity.gamma	allelic_series_growth_screen_and_sensitivity.rho.treated_imatinib	allelic_series_growth_screen_and_sensitivity.rho.treated_topotecan	antimycin_sensitivity.gamma	antimycin_sensitivity.rho.treated	oligomycin_sensitivity.gamma	oligomycin_sensitivity.rho.treated	rigosertib_sensitivity_sublibrary.gamma	rigosertib_sensitivity_sublibrary.rho.treated_abt	rigosertib_sensitivity_sublibrary.rho.treated_bi	rigosertib_sensitivity_sublibrary.rho.treated_col	rigosertib_sensitivity_sublibrary.rho.treated_maytan	rigosertib_sensitivity_sublibrary.rho.treated_rigo	rigosertib_sensitivity_sublibrary.rho.treated_rio	rigosertib_sensitivity_sublibrary.rho.treated_vin	rigosertib_sensitivity_sublibrary_part2.gamma	rigosertib_sensitivity_sublibrary_part2.rho.treated_Alisertib	rigosertib_sensitivity_sublibrary_part2.rho.treated_BI2536	rigosertib_sensitivity_sublibrary_part2.rho.treated_Blebbistatin	rigosertib_sensitivity_sublibrary_part2.rho.treated_Rigosertib	rigosertib_sensitivity_sublibrary_part2.rho.treated_STLC	rigosertib_sensitivity_sublibrary_part2.rho.treated_Vinblastine	H358_drug_sensitivity.gamma	H358_drug_sensitivity.rho.treated	HFF_CMV_sensitivity.gamma	HFF_CMV_sensitivity.rho.treated	Wells_lab_Ras_mutant_EV.gamma	Wells_lab_Ras_mutant_KM.gamma	Wells_lab_Ras_mutant_KP.gamma	miapaca_drug_sensitivity.gamma	miapaca_drug_sensitivity.rho.treated	BCMA_GW	Chap5d	counts	H1_Custom	H1_H3_H4dualreporter_Dox_mApple	H1_H3_H4dualreporter_Un_mApple	H2_Custom
SPI1_P1P2	-6.7671	14.1994	-9.6995	11.4237	NA	26.0077	-5.23061	37.6294	NA	-13.2721	NA	-5.22858	NA	NA	NA	NA	NA	NA	-7.27613	26.7759	26.6021	20.9718	3.22327	21.5258	38.8777	25.8401	-9.53998	55.2347	57.3643	59.3835	47.8059	-9.14528	53.6898	NA	NA	NA	NA	NA	NA	NA	NA	NA	NA	NA	NA	NA	NA	NA	NA
C12orf66_P1P2	-1.95437	-8.89818	-0.95592	NA	18.4937	-18.9408	NA	26.9941	NA	-3.04618	NA	NA	NA	NA	5.7302	NA	NA	NA	-1.33467	56.2735	41.0528	74.4619	46.6698	32.644	19.7101	2.62032	1.30065	44.4419	50.4	66.6082	48.0604	30.8282	57.5771	NA	NA	NA	NA	NA	NA	NA	NA	NA	NA	NA	NA	NA	NA	NA	NA
PRR14L_P1P2	-5.47424	-9.23688	-7.8469	-9.25652	NA	-15.9182	NA	NA	NA	-3.54598	NA	-6.31892	-4.0349	-12.6323	NA	NA	NA	NA	NA	NA	NA	NA	NA	NA	NA	NA	NA	NA	NA	NA	NA	NA	NA	NA	NA	NA	NA	NA	NA	NA	NA	NA	NA	NA	NA	NA	NA	NA	NA
DEPDC5_P1P2	-6.93963	-8.16513	-11.2271	NA	13.6299	-27.316	NA	35.2448	NA	-8.78883	NA	-10.5035	-10.6022	18.6579	NA	NA	NA	NA	NA	NA	NA	NA	NA	NA	NA	NA	NA	NA	NA	NA	NA	NA	NA	NA	NA	NA	NA	NA	NA	NA	NA	NA	NA	NA	NA	NA	NA	NA	NA
URB1_P1P2	6.76048	NA	NA	NA	NA	NA	6.46317	NA	NA	NA	NA	NA	NA	NA	NA	NA	NA	NA	NA	NA	NA	NA	NA	NA	NA	NA	NA	NA	NA	NA	NA	NA	NA	NA	NA	4.80763	NA	NA	NA	NA	NA	NA	NA	NA	NA	NA	NA	NA	NA
FBXO17_P1	3.91673	NA	NA	NA	NA	NA	1.77442	NA	NA	NA	NA	NA	NA	NA	NA	NA	NA	NA	NA	NA	NA	NA	NA	NA	NA	NA	NA	NA	NA	NA	NA	NA	NA	NA	NA	NA	NA	NA	NA	NA	NA	NA	NA	NA	NA	NA	NA	NA	NA
SARS2_P1P2	3.91673	NA	NA	NA	NA	NA	1.77442	NA	NA	NA	NA	NA	NA	NA	NA	NA	NA	NA	NA	NA	NA	NA	NA	NA	NA	NA	NA	NA	NA	NA	NA	NA	NA	NA	NA	NA	NA	NA	NA	NA	NA	NA	NA	NA	NA	NA	NA	NA	NA
U2AF1_P1P2	11.8277	NA	32.8	4.35297	15.6737	NA	11.0743	NA	NA	NA	NA	64.2733	NA	NA	NA	NA	NA	NA	NA	NA	NA	NA	NA	NA	NA	NA	NA	NA	NA	NA	NA	NA	NA	85.5206	NA	10.0748	-3.8897	NA	NA	NA	113.168	NA	NA	NA	NA	NA	NA	NA	NA
CD300LG_P1P2	10.0244	NA	13.9602	NA	NA	NA	14.9076	NA	NA	NA	NA	NA	NA	NA	NA	NA	NA	NA	NA	NA	NA	NA	NA	NA	NA	NA	NA	NA	NA	NA	NA	NA	NA	NA	NA	NA	NA	NA	NA	NA	NA	NA	NA	NA	NA	NA	NA	NA	NA
GNAZ_P1P2	7.97921	NA	NA	NA	NA	-10.8495	NA	NA	NA	NA	NA	NA	NA	NA	NA	NA	NA	NA	NA	NA	NA	NA	NA	NA	NA	NA	NA	NA	NA	NA	NA	NA	NA	NA	NA	NA	NA	NA	NA	NA	NA	NA	NA	NA	NA	NA	NA	NA	NA
VSIG10L_P2	0.943501	NA	NA	NA	NA	NA	NA	NA	NA	NA	NA	NA	NA	NA	NA	NA	NA	NA	NA	NA	NA	NA	NA	NA	NA	NA	NA	NA	NA	NA	NA	NA	NA	NA	NA	NA	NA	NA	NA	NA	NA	NA	NA	NA	NA	NA	NA	NA	NA
UTP14A_P1P2	22.7186	NA	43.379	NA	-10.6564	1.65704	39.556	33.7744	NA	2.28297	NA	29.9681	NA	NA	NA	NA	NA	NA	NA	NA	NA	NA	NA	NA	NA	NA	NA	NA	NA	NA	NA	NA	NA	NA	NA	11.813	-5.2728	NA	NA	NA	NA	NA	NA	NA	NA	NA	NA	NA	NA
GAB1_P1P2	0.370368	NA	NA	NA	5.74382	NA	NA	NA	NA	NA	NA	NA	NA	NA	NA	NA	NA	NA	NA	NA	NA	NA	NA	NA	NA	NA	NA	NA	NA	NA	NA	NA	NA	NA	5.54145	NA	NA	NA	NA	NA	NA	NA	NA	NA	NA	NA	NA	NA	NA
BICD2_P1P2	5.47982	NA	NA	NA	NA	NA	NA	NA	NA	NA	NA	NA	NA	NA	NA	NA	NA	NA	NA	NA	NA	NA	NA	NA	NA	NA	NA	NA	NA	NA	NA	NA	NA	NA	NA	NA	NA	NA	NA	NA	NA	NA	NA	NA	NA	NA	-2.35833	NA	NA
ZBTB17_P1P2	8.95254	NA	13.1233	NA	NA	-7.32203	NA	NA	NA	NA	NA	21.7545	-16.4627	NA	NA	NA	NA	NA	NA	NA	NA	NA	NA	NA	NA	NA	NA	NA	NA	NA	NA	NA	NA	21.2152	-4.80012	NA	NA	NA	NA	NA	NA	5.1268	NA	NA	NA	NA	NA	NA	NA
GTF3C1_P1P2	6.04294	NA	NA	NA	NA	-3.23265	14.4288	NA	NA	-1.97521	NA	38.1684	NA	NA	NA	NA	NA	NA	NA	NA	NA	NA	NA	NA	NA	NA	NA	NA	NA	NA	NA	NA	NA	NA	NA	NA	NA	NA	NA	NA	NA	NA	NA	NA	NA	NA	NA	NA	NA
YKT6_P1P2	8.94515	NA	8.34519	NA	NA	NA	6.40151	NA	NA	NA	NA	25.2392	-21.5685	-11.1949	NA	NA	4.02012	NA	NA	NA	NA	NA	NA	NA	NA	NA	NA	NA	NA	NA	NA	NA	NA	NA	NA	NA	NA	NA	NA	NA	NA	NA	NA	NA	NA	NA	NA	NA	NA
ELAVL1_P1P2	10.9527	NA	NA	NA	7.39275	NA	NA	19.2738	NA	-5.25786	NA	NA	NA	NA	NA	NA	NA	NA	NA	NA	NA	NA	NA	NA	NA	NA	NA	NA	NA	NA	NA	NA	NA	NA	-6.67644	NA	NA	NA	NA	NA	NA	NA	2.21261	NA	NA	NA	NA	NA	NA
PLEKHJ1_P1P2	4.223	NA	NA	NA	NA	NA	NA	NA	NA	NA	NA	NA	NA	NA	NA	NA	NA	NA	NA	NA	NA	NA	NA	NA	NA	NA	NA	NA	NA	NA	NA	NA	NA	NA	NA	NA	NA	NA	NA	NA	18.0499	NA	NA	NA	NA	NA	NA	NA	NA
GTF2H2C_P1P2	5.16217	NA	10.4409	NA	-9.51457	NA	10.5842	-10.0256	NA	1.95338	NA	8.96027	4.18791	1.61903	NA	NA	NA	NA	NA	NA	NA	NA	NA	NA	NA	NA	NA	NA	NA	NA	NA	NA	NA	NA	NA	NA	NA	NA	NA	NA	NA	NA	NA	NA	NA	NA	NA	NA	NA
GTF2H2D_P1P2	5.16217	NA	10.4409	NA	-9.51457	NA	10.5842	-10.0256	NA	1.95338	NA	8.96027	4.18791	1.61903	NA	NA	NA	NA	NA	NA	NA	NA	NA	NA	NA	NA	NA	NA	NA	NA	NA	NA	NA	NA	NA	NA	NA	NA	NA	NA	NA	NA	NA	NA	NA	NA	NA	NA	NA
PRAMEF10_P1P2	3.16264	NA	NA	NA	NA	NA	NA	NA	NA	NA	NA	NA	NA	NA	NA	NA	3.3639	NA	NA	NA	NA	NA	NA	NA	NA	NA	NA	NA	NA	NA	NA	NA	NA	NA	NA	NA	NA	NA	NA	NA	NA	NA	NA	NA	NA	NA	NA	NA	NA
GNB2L1_P1P2	6.1087	NA	29.9045	NA	NA	NA	37.2465	7.57312	NA	-6.45282	NA	54.0195	NA	NA	NA	NA	NA	NA	NA	NA	NA	NA	NA	NA	NA	NA	NA	NA	NA	NA	NA	NA	NA	NA	NA	4.24004	NA	NA	NA	NA	NA	NA	NA	NA	NA	NA	NA	-5.53781	NA
PCNA_P1P2	20.2488	NA	40.0444	NA	NA	NA	29.2101	14.0565	NA	-5.71203	NA	31.4554	NA	-11.8631	NA	NA	NA	NA	NA	NA	NA	NA	NA	NA	NA	NA	NA	NA	NA	NA	NA	NA	NA	NA	NA	NA	NA	NA	NA	NA	NA	NA	NA	NA	NA	NA	NA	NA	NA
ATP6V0C_P1P2	12.6398	23.5717	14.0377	NA	12.5068	38.9429	14.6332	NA	NA	NA	NA	17.494	NA	NA	NA	NA	NA	NA	NA	NA	NA	NA	NA	NA	NA	NA	NA	NA	NA	NA	NA	NA	NA	46.646	-26.6055	NA	NA	NA	NA	NA	51.1325	-17.2164	3.77024	NA	NA	NA	NA	NA	NA
ARCN1_P1P2	58.542	NA	103.245	19.4334	18.7443	37.9969	55.4989	51.1613	NA	NA	NA	34.2123	NA	-7.97222	NA	NA	NA	NA	NA	NA	NA	NA	NA	NA	NA	NA	NA	NA	NA	NA	NA	NA	NA	27.1165	NA	27.5375	NA	NA	NA	NA	73.0397	NA	NA	NA	NA	NA	NA	NA	NA
PSMC3_P1P2	11.1643	NA	16.1863	19.7033	NA	NA	7.93464	2.94367	NA	NA	NA	35.6599	NA	-5.5836	NA	NA	NA	NA	NA	NA	NA	NA	NA	NA	NA	NA	NA	NA	NA	NA	NA	NA	NA	NA	NA	NA	NA	NA	NA	NA	17.525	NA	-3.90179	NA	NA	NA	4.88551	NA	NA
PLA2G7_P1P2	4.91401	NA	NA	NA	NA	NA	4.00179	NA	NA	NA	NA	NA	NA	NA	NA	NA	NA	NA	NA	NA	NA	NA	NA	NA	NA	NA	NA	NA	NA	NA	NA	NA	NA	NA	NA	NA	NA	NA	NA	NA	NA	NA	NA	NA	NA	NA	NA	NA	NA
TUBD1_P1P2	5.24963	NA	3.421	NA	NA	NA	NA	NA	NA	NA	NA	NA	NA	NA	NA	NA	NA	NA	NA	NA	NA	NA	NA	NA	NA	NA	NA	NA	NA	NA	NA	NA	NA	NA	NA	NA	NA	NA	NA	NA	NA	NA	NA	NA	NA	NA	NA	NA	7.26403
TKT_P1	5.71195	NA	12.4409	NA	NA	NA	21.7325	NA	NA	NA	NA	12.1128	-14.1347	-4.37911	NA	NA	NA	19.4863	NA	NA	NA	NA	NA	NA	NA	NA	NA	NA	NA	NA	NA	NA	NA	NA	NA	NA	NA	NA	NA	NA	NA	NA	NA	NA	NA	NA	-2.15048	NA	NA
PSMA2_P1P2	11.5689	NA	19.1647	NA	15.0112	NA	9.37026	9.66534	NA	NA	NA	16.6401	-3.01838	-5.49875	NA	NA	NA	NA	10.4858	-35.2883	-23.5983	2.97307	2.40568	-13.6891	-17.1361	NA	20.5896	-23.8103	-30.6833	-46.295	-25.4431	-3.6791	-34.9466	6.54552	-4.07916	4.06145	-3.14682	NA	NA	NA	NA	NA	NA	NA	NA	NA	NA	NA	NA
FERMT3_P2	21.5656	NA	NA	NA	NA	NA	NA	NA	18.7172	NA	NA	NA	NA	NA	NA	NA	NA	NA	NA	NA	NA	NA	NA	NA	NA	NA	NA	NA	NA	NA	NA	NA	NA	NA	NA	NA	NA	NA	NA	NA	NA	-21.208	NA	NA	NA	NA	-3.28482	NA	NA
CMAS_P1P2	14.2432	NA	60.3448	NA	NA	-22.6554	17.316	11.5673	NA	NA	NA	12.9549	NA	NA	NA	NA	NA	NA	NA	NA	NA	NA	NA	NA	NA	NA	NA	NA	NA	NA	NA	NA	NA	NA	-1.60686	NA	NA	NA	NA	NA	NA	NA	NA	NA	NA	-7.38113	NA	NA	NA
RP9_P1P2	6.32371	NA	NA	NA	NA	NA	NA	NA	NA	NA	NA	NA	NA	NA	NA	NA	NA	NA	NA	NA	NA	NA	NA	NA	NA	NA	NA	NA	NA	NA	NA	NA	NA	NA	NA	NA	NA	NA	NA	NA	NA	NA	NA	NA	NA	NA	NA	NA	NA
LAMTOR5_P1P2	5.9185	NA	8.20914	NA	NA	-6.76638	8.68348	NA	NA	NA	NA	9.0611	NA	-2.68673	NA	NA	NA	NA	11.3617	-43.7905	-30.9575	-36.8864	-30.7576	-23.628	-35.2192	NA	10.4501	-34.5137	-41.1365	-46.5994	-30.5512	-32.9217	-42.3849	NA	NA	NA	-3.50157	NA	NA	NA	NA	NA	NA	NA	NA	NA	NA	NA	-24.5763
NMNAT1_P1P2	26.7501	NA	22.0997	-7.12397	NA	NA	40.9583	NA	NA	NA	NA	48.0662	-18.2456	NA	13.5579	NA	17.0976	NA	NA	NA	NA	NA	NA	NA	NA	NA	NA	NA	NA	NA	NA	NA	NA	NA	NA	NA	NA	NA	NA	NA	12.3652	-5.91954	NA	NA	NA	NA	NA	NA	NA
FARSA_P1P2	30.6781	NA	50.0629	NA	NA	NA	26.077	NA	NA	NA	NA	72.9572	NA	-11.6568	NA	NA	NA	NA	33.3234	-38.3841	-13.2353	NA	-1.28304	-14.2009	-45.5386	-23.8205	37.4685	NA	-14.7927	-23.8595	-31.0122	-11.5912	-15.923	NA	NA	5.16856	NA	NA	NA	NA	67.5968	NA	NA	NA	NA	NA	NA	NA	NA
TEF_P1	8.8864	NA	NA	NA	NA	NA	NA	NA	14.8948	NA	NA	NA	NA	NA	NA	NA	NA	NA	NA	NA	NA	NA	NA	NA	NA	NA	NA	NA	NA	NA	NA	NA	NA	NA	NA	NA	NA	NA	NA	NA	NA	-28.7432	NA	NA	NA	NA	NA	NA	NA
RBM4_P1	45.2337	NA	62.317	NA	30.9437	-15.0966	45.7866	38.7319	9.35032	NA	NA	70.2995	8.81963	NA	NA	NA	NA	NA	NA	NA	NA	NA	NA	NA	NA	NA	NA	NA	NA	NA	NA	NA	NA	27.209	NA	6.30312	-10.2742	NA	NA	NA	60.3518	NA	NA	NA	NA	NA	NA	NA	NA
RBM14_P1P2	45.2337	NA	62.317	NA	30.9437	-15.0966	45.7866	38.7319	5.06271	NA	NA	70.2995	8.81963	NA	NA	NA	NA	NA	NA	NA	NA	NA	NA	NA	NA	NA	NA	NA	NA	NA	NA	NA	NA	1.82016	NA	6.25082	-10.9677	NA	NA	NA	NA	NA	NA	NA	NA	NA	NA	NA	NA
RBM14-RBM4_P1	45.2337	NA	62.317	NA	30.9437	-15.0966	45.7866	38.7319	9.35032	NA	NA	70.2995	8.81963	NA	NA	NA	NA	NA	NA	NA	NA	NA	NA	NA	NA	NA	NA	NA	NA	NA	NA	NA	NA	27.209	NA	6.30312	-10.2742	NA	NA	NA	60.3518	NA	NA	NA	NA	NA	NA	NA	NA
SMIM17_P1P2	1.21809	NA	NA	NA	NA	NA	NA	NA	NA	NA	NA	NA	NA	NA	NA	NA	NA	NA	NA	NA	NA	NA	NA	NA	NA	NA	NA	NA	NA	NA	NA	NA	NA	NA	NA	NA	NA	NA	NA	NA	NA	NA	NA	NA	NA	NA	NA	NA	NA
YARS2_P1P2	8.8913	NA	16.6981	NA	NA	-21.6931	14.3436	NA	NA	NA	NA	40.4025	-2.05322	-8.25949	NA	NA	NA	NA	NA	NA	NA	NA	NA	NA	NA	NA	NA	NA	NA	NA	NA	NA	NA	NA	NA	NA	NA	NA	NA	NA	NA	NA	NA	NA	NA	-5.09919	NA	-8.63776	NA
GRINA_P1P2	8.33584	NA	NA	NA	NA	NA	NA	NA	NA	NA	NA	NA	NA	NA	NA	NA	NA	NA	NA	NA	NA	NA	NA	NA	NA	NA	NA	NA	NA	NA	NA	NA	NA	NA	NA	NA	NA	NA	NA	NA	NA	NA	2.10203	NA	NA	NA	NA	NA	NA
PGF_P1P2	6.45983	NA	NA	NA	NA	NA	NA	NA	NA	NA	NA	NA	NA	NA	NA	NA	NA	NA	NA	NA	NA	NA	NA	NA	NA	NA	NA	NA	NA	NA	NA	NA	NA	NA	NA	NA	NA	NA	NA	NA	NA	NA	NA	NA	NA	NA	NA	NA	NA
NENF_P1P2	5.38468	NA	6.65104	NA	NA	NA	NA	NA	NA	NA	NA	14.4844	NA	NA	NA	NA	NA	NA	NA	NA	NA	NA	NA	NA	NA	NA	NA	NA	NA	NA	NA	NA	NA	NA	NA	NA	NA	NA	2.93435	NA	NA	NA	NA	NA	NA	NA	NA	NA	NA
CCNA2_P1P2	5.79627	NA	10.9245	NA	38.3599	NA	NA	26.2756	NA	NA	NA	11.0863	NA	NA	NA	10.5035	NA	NA	NA	NA	NA	NA	NA	NA	NA	NA	NA	NA	NA	NA	NA	NA	NA	NA	NA	NA	NA	NA	NA	NA	NA	NA	NA	NA	NA	NA	NA	NA	NA
CNR1_P1P2	7.37789	NA	NA	NA	NA	NA	NA	NA	NA	NA	NA	NA	NA	NA	NA	NA	NA	NA	NA	NA	NA	NA	NA	NA	NA	NA	NA	NA	NA	NA	NA	NA	NA	NA	NA	NA	NA	NA	NA	NA	NA	NA	NA	NA	NA	NA	NA	NA	NA
PPA2_P1P2	11.9137	NA	26.5856	NA	NA	-10.8888	24.6673	NA	NA	NA	NA	16.6432	NA	-3.40242	5.72834	NA	NA	NA	NA	NA	NA	NA	NA	NA	NA	NA	NA	NA	NA	NA	NA	NA	NA	NA	NA	NA	NA	NA	NA	NA	NA	NA	NA	NA	NA	NA	-2.97072	NA	NA
ARSE_P1P2	0.965047	NA	NA	NA	NA	NA	NA	NA	NA	NA	NA	NA	NA	NA	NA	NA	NA	NA	NA	NA	NA	NA	NA	NA	NA	NA	NA	NA	NA	NA	NA	NA	NA	NA	NA	NA	NA	NA	NA	NA	NA	NA	2.24101	NA	NA	NA	NA	NA	NA
ZSCAN2_P1P2	6.94691	NA	NA	NA	NA	NA	NA	NA	NA	NA	NA	NA	NA	NA	NA	NA	NA	NA	NA	NA	NA	NA	NA	NA	NA	NA	NA	NA	NA	NA	NA	NA	NA	NA	NA	NA	NA	NA	NA	NA	NA	NA	NA	NA	NA	NA	NA	NA	NA
TP53I13_P1P2	7.57838	NA	NA	NA	NA	NA	NA	NA	NA	NA	NA	51.5861	-4.55928	-10.1027	NA	NA	NA	NA	NA	NA	NA	NA	NA	NA	NA	NA	NA	NA	NA	NA	NA	NA	NA	NA	NA	NA	NA	0.653946	NA	NA	NA	NA	NA	NA	NA	NA	NA	NA	NA
TRABD_P1	4.47358	NA	2.82667	NA	NA	NA	3.99788	NA	NA	NA	NA	15.5962	NA	-4.56169	NA	NA	NA	NA	NA	NA	NA	NA	NA	NA	NA	NA	NA	NA	NA	NA	NA	NA	NA	NA	NA	NA	NA	NA	NA	NA	NA	NA	NA	NA	NA	NA	NA	NA	NA
POMP_P1P2	11.2029	NA	6.98147	NA	7.07182	NA	5.4573	4.77275	NA	NA	NA	21.9687	NA	NA	NA	NA	NA	NA	NA	NA	NA	NA	NA	NA	NA	NA	NA	NA	NA	NA	NA	NA	NA	22.2676	-13.03	NA	NA	NA	NA	NA	16.7052	NA	NA	NA	NA	NA	NA	NA	NA
RPL6_P1P2	67.334	NA	85.5289	NA	NA	NA	28.7381	38.8139	NA	NA	NA	75.2784	NA	-7.43671	NA	NA	NA	17.7364	NA	NA	NA	NA	NA	NA	NA	NA	NA	NA	NA	NA	NA	NA	NA	40.4256	-4.45847	17.3485	NA	NA	NA	NA	103.192	NA	NA	NA	NA	NA	NA	NA	NA
NOP58_P1P2	35.7617	NA	57.0656	NA	NA	NA	34.7231	29.8687	NA	NA	NA	56.1545	NA	-14.2768	NA	NA	NA	NA	NA	NA	NA	NA	NA	NA	NA	NA	NA	NA	NA	NA	NA	NA	NA	NA	NA	8.25007	NA	NA	NA	NA	58.8317	NA	NA	NA	NA	NA	8.56662	NA	NA
CENPN_P1P2	10.1685	NA	15.0848	NA	NA	NA	8.70206	NA	NA	NA	NA	16.1311	NA	-10.8209	NA	NA	NA	NA	NA	NA	NA	NA	NA	NA	NA	NA	NA	NA	NA	NA	NA	NA	NA	NA	NA	NA	NA	NA	NA	NA	NA	NA	NA	NA	NA	NA	NA	NA	NA
RBM39_P1P2	7.62266	NA	9.90995	NA	NA	NA	5.40107	NA	NA	NA	NA	20.3225	NA	NA	NA	NA	NA	NA	NA	NA	NA	NA	NA	NA	NA	NA	NA	NA	NA	NA	NA	NA	NA	NA	NA	NA	NA	NA	NA	NA	NA	NA	NA	NA	NA	NA	NA	NA	NA
COG6_P1P2	3.17289	NA	7.09732	-23.3159	NA	NA	6.52974	NA	NA	NA	NA	10.0147	-1.90555	-2.3918	NA	NA	NA	NA	NA	NA	NA	NA	NA	NA	NA	NA	NA	NA	NA	NA	NA	NA	NA	NA	NA	NA	NA	NA	NA	NA	NA	NA	NA	NA	NA	NA	NA	NA	NA
HNRNPC_P1P2	11.8826	NA	22.2266	NA	17.9881	NA	10.6652	NA	NA	NA	NA	22.4325	-4.64957	NA	NA	NA	NA	NA	NA	NA	NA	NA	NA	NA	NA	NA	NA	NA	NA	NA	NA	NA	NA	NA	NA	NA	NA	NA	NA	NA	13.9565	NA	NA	NA	NA	NA	NA	-25.5172	NA
CAV1_P2	0.877853	NA	NA	NA	NA	NA	NA	NA	NA	NA	NA	NA	NA	NA	NA	NA	NA	NA	NA	NA	NA	NA	NA	NA	NA	NA	NA	NA	NA	NA	NA	NA	NA	NA	NA	NA	NA	NA	NA	NA	NA	NA	NA	NA	NA	NA	NA	NA	NA
RPS27A_P1P2	29.4698	NA	67.2221	NA	NA	NA	41.5865	26.6393	NA	NA	NA	87.0511	NA	NA	NA	NA	NA	NA	NA	NA	NA	NA	NA	NA	NA	NA	NA	NA	NA	NA	NA	NA	NA	71.0636	NA	18.8661	-14.1155	NA	NA	NA	89.8716	NA	NA	NA	NA	NA	NA	NA	NA
TRPM7_P1P2	32.7849	NA	62.2855	NA	-19.1892	NA	35.4893	14.8205	NA	3.46818	NA	67.9195	NA	-14.2243	NA	NA	NA	NA	NA	NA	NA	NA	NA	NA	NA	NA	NA	NA	NA	NA	NA	NA	NA	NA	NA	NA	NA	NA	NA	NA	NA	NA	NA	NA	NA	4.78294	NA	NA	NA
PEX19_P1P2	3.84058	-7.27674	11.5954	NA	NA	-6.67815	NA	NA	NA	NA	NA	11.0012	-1.8289	-3.04628	NA	NA	NA	NA	NA	NA	NA	NA	NA	NA	NA	NA	NA	NA	NA	NA	NA	NA	NA	NA	NA	NA	NA	NA	NA	NA	4.96908	-7.79488	-17.0533	NA	NA	NA	NA	-2.35911	NA
DCAF8_P1	3.84058	-7.27674	11.5954	NA	NA	-6.67815	NA	NA	NA	NA	NA	11.0012	-1.8289	-3.04628	NA	NA	NA	NA	NA	NA	NA	NA	NA	NA	NA	NA	NA	NA	NA	NA	NA	NA	NA	NA	NA	NA	NA	NA	NA	NA	4.96908	-7.79488	-17.0533	NA	NA	NA	NA	-2.35911	NA
BORA_P1P2	12.9253	NA	51.2242	NA	-8.64214	NA	35.56	25.0196	NA	-12.1627	NA	30.0919	NA	NA	NA	NA	NA	NA	NA	NA	NA	NA	NA	NA	NA	NA	NA	NA	NA	NA	NA	NA	NA	5.63751	NA	NA	NA	NA	NA	NA	51.5922	NA	-2.19305	NA	NA	NA	NA	NA	NA
SPAG7_P1P2	7.32479	NA	14.3691	21.8368	-12.6704	NA	10.6888	NA	NA	NA	NA	47.8429	NA	NA	NA	NA	NA	NA	NA	NA	NA	NA	NA	NA	NA	NA	NA	NA	NA	NA	NA	NA	NA	NA	NA	NA	NA	NA	NA	NA	NA	NA	NA	NA	NA	NA	NA	NA	NA
SAAL1_P1	2.91005	NA	NA	NA	NA	NA	NA	NA	NA	NA	NA	NA	NA	NA	NA	NA	NA	NA	NA	NA	NA	NA	NA	NA	NA	NA	NA	NA	NA	NA	NA	NA	NA	NA	NA	NA	NA	NA	NA	NA	NA	NA	NA	NA	NA	NA	NA	NA	NA
KCNH2_P1	0.468498	NA	NA	NA	NA	NA	NA	NA	NA	NA	NA	NA	NA	NA	NA	NA	NA	NA	NA	NA	NA	NA	NA	NA	NA	NA	NA	NA	NA	NA	NA	NA	NA	NA	NA	NA	NA	NA	NA	NA	NA	NA	NA	NA	NA	NA	NA	NA	NA
AP2M1_P1	57.867	NA	84.3773	NA	NA	NA	58.6128	NA	NA	-5.55468	NA	87.9438	NA	-6.77958	NA	NA	NA	NA	NA	NA	NA	NA	NA	NA	NA	NA	NA	NA	NA	NA	NA	NA	NA	12.5389	NA	NA	NA	NA	NA	NA	25.962	-10.1745	NA	NA	NA	NA	-2.44402	NA	NA
RRAGA_P1P2	10.8737	NA	NA	NA	NA	NA	17.3621	NA	NA	NA	NA	NA	NA	NA	NA	NA	NA	NA	NA	NA	NA	NA	NA	NA	NA	NA	NA	NA	NA	NA	NA	NA	NA	NA	NA	NA	NA	NA	NA	NA	NA	NA	NA	NA	NA	NA	NA	NA	NA
SERPINH1_P1P2	2.01061	NA	NA	NA	NA	NA	NA	NA	NA	NA	NA	NA	NA	NA	NA	NA	NA	NA	NA	NA	NA	NA	NA	NA	NA	NA	NA	NA	NA	NA	NA	NA	NA	NA	NA	NA	-1.38782	NA	NA	NA	NA	NA	NA	NA	NA	NA	NA	NA	NA
MAFF_P1P2	5.95264	NA	NA	NA	NA	NA	NA	NA	NA	NA	NA	NA	NA	NA	NA	NA	NA	NA	NA	NA	NA	NA	NA	NA	NA	NA	NA	NA	NA	NA	NA	NA	NA	NA	NA	NA	NA	NA	NA	NA	NA	NA	NA	NA	NA	NA	NA	NA	NA
TRAPPC1_P1P2	7.07481	NA	13.1914	NA	NA	NA	NA	NA	NA	NA	NA	18.5242	NA	-3.98876	NA	NA	NA	NA	NA	NA	NA	NA	NA	NA	NA	NA	NA	NA	NA	NA	NA	NA	NA	NA	NA	NA	NA	NA	NA	NA	NA	NA	NA	NA	NA	NA	NA	NA	NA
DENND4B_P2	2.62643	NA	NA	NA	NA	NA	NA	NA	NA	NA	NA	NA	NA	NA	NA	NA	NA	NA	NA	NA	NA	NA	NA	NA	NA	NA	NA	NA	NA	NA	NA	NA	NA	NA	NA	NA	NA	NA	NA	NA	NA	NA	NA	NA	NA	NA	NA	NA	NA
INTS9_P1P2	22.6409	NA	20.8375	NA	10.2794	NA	23.5665	NA	NA	NA	NA	58.9482	-10.1456	NA	NA	NA	NA	NA	NA	NA	NA	NA	NA	NA	NA	NA	NA	NA	NA	NA	NA	NA	NA	NA	NA	NA	NA	NA	NA	NA	18.4616	NA	NA	NA	NA	NA	NA	NA	NA
CACTIN_P1P2	16.3504	NA	50.5857	NA	NA	NA	15.2929	NA	NA	NA	NA	27.8002	NA	NA	NA	NA	NA	NA	NA	NA	NA	NA	NA	NA	NA	NA	NA	NA	NA	NA	NA	NA	NA	NA	NA	9.77319	NA	NA	NA	NA	9.07968	NA	NA	NA	NA	NA	NA	NA	NA
USPL1_P1P2	4.9001	NA	NA	NA	NA	NA	NA	NA	NA	NA	NA	8.52754	-3.46087	NA	NA	NA	NA	NA	NA	NA	NA	NA	NA	NA	NA	NA	NA	NA	NA	NA	NA	NA	NA	34.8626	NA	NA	NA	NA	NA	NA	NA	NA	NA	NA	NA	NA	NA	-9.8586	NA
MFGE8_P1P2	5.36368	NA	NA	NA	NA	NA	NA	NA	NA	NA	NA	NA	NA	NA	NA	NA	NA	NA	NA	NA	NA	NA	NA	NA	NA	NA	NA	NA	NA	NA	NA	NA	NA	NA	NA	NA	NA	NA	NA	NA	NA	NA	NA	NA	NA	NA	NA	NA	NA
KARS_P1P2	38.5194	NA	44.7191	NA	NA	NA	24.2066	NA	NA	NA	NA	29.611	NA	-15.2982	NA	NA	NA	NA	NA	NA	NA	NA	NA	NA	NA	NA	NA	NA	NA	NA	NA	NA	NA	NA	NA	NA	NA	NA	NA	NA	NA	NA	NA	NA	NA	NA	NA	NA	NA
ATP5O_P1P2	19.7895	NA	27.9996	NA	NA	NA	10.7118	NA	NA	2.68348	NA	59.2847	NA	-11.0347	13.2886	NA	NA	21.1856	NA	NA	NA	NA	NA	NA	NA	NA	NA	NA	NA	NA	NA	NA	NA	NA	NA	NA	NA	NA	NA	NA	NA	NA	NA	NA	NA	NA	NA	-28.8609	NA
CSDE1_P1P2	13.5191	NA	18.4567	NA	38.8458	NA	35.391	-2.10889	NA	-14.9625	NA	17.7217	-8.01006	-0.827274	NA	NA	NA	NA	NA	NA	NA	NA	NA	NA	NA	NA	NA	NA	NA	NA	NA	NA	NA	NA	NA	NA	NA	NA	NA	NA	19.1045	NA	-4.28465	NA	NA	NA	NA	NA	NA
SV2A_P1P2	0.329535	NA	NA	NA	NA	NA	NA	NA	NA	NA	NA	NA	NA	NA	NA	NA	NA	NA	NA	NA	NA	NA	NA	NA	NA	NA	NA	NA	NA	NA	NA	NA	NA	NA	NA	NA	NA	NA	NA	NA	NA	NA	NA	NA	14.2011	NA	NA	NA	NA
XRN1_P1P2	4.17086	-8.32274	1.93809	NA	-3.47293	NA	5.50019	NA	NA	-4.68497	NA	NA	NA	NA	NA	NA	NA	NA	4.41353	NA	-22.4068	22.9112	NA	NA	12.3687	NA	6.17396	-25.3342	-34.7306	-36.4153	39.3142	NA	-8.02196	NA	NA	NA	NA	NA	NA	NA	NA	NA	NA	NA	NA	NA	NA	NA	NA
RINL_P2	0.810158	NA	NA	NA	NA	NA	NA	NA	NA	NA	NA	NA	NA	NA	NA	NA	NA	NA	NA	NA	NA	NA	NA	NA	NA	NA	NA	NA	NA	NA	NA	NA	NA	NA	NA	NA	NA	NA	NA	NA	NA	NA	NA	NA	NA	NA	-1.9137	NA	NA
POLN_P1P2	31.0612	NA	47.0046	NA	NA	NA	25.6721	NA	NA	NA	NA	54.3363	-8.97833	0.580394	NA	NA	NA	NA	23.6511	-26.6987	NA	-15.7803	-15.2621	NA	10.2587	NA	32.4867	NA	12.9582	-12.286	43.2159	-15.0298	-23.2294	6.81631	NA	11.7287	-1.94737	NA	NA	NA	66.5327	NA	NA	NA	NA	NA	NA	NA	NA
HAUS3_P1P2	31.0612	NA	47.0046	NA	NA	NA	25.6721	NA	NA	NA	NA	54.3363	-8.97833	0.580394	NA	NA	NA	NA	23.6511	-26.6987	NA	-15.7803	-15.2621	NA	10.2587	NA	32.4867	NA	12.9582	-12.286	43.2159	-15.0298	-23.2294	9.97287	NA	7.21998	-1.95625	NA	NA	NA	66.5327	NA	NA	NA	NA	NA	NA	NA	NA
DNAJC25-GNG10_P1P2	1.48047	NA	NA	NA	NA	NA	NA	NA	NA	NA	NA	NA	NA	NA	NA	NA	NA	NA	NA	NA	NA	NA	NA	NA	NA	NA	NA	NA	NA	NA	NA	NA	NA	NA	NA	NA	NA	NA	NA	NA	NA	NA	NA	NA	NA	NA	-2.48739	NA	NA
DNAJC25_P1P2	1.48047	NA	NA	NA	NA	NA	NA	NA	NA	NA	NA	NA	NA	NA	NA	NA	NA	NA	NA	NA	NA	NA	NA	NA	NA	NA	NA	NA	NA	NA	NA	NA	NA	NA	NA	NA	NA	NA	NA	NA	NA	NA	NA	NA	NA	NA	NA	NA	NA
MAP2K7_P1P2	6.60421	NA	10.2772	NA	NA	NA	NA	NA	NA	NA	NA	52.7369	-12.2628	NA	NA	NA	NA	NA	NA	NA	NA	NA	NA	NA	NA	NA	NA	NA	NA	NA	NA	NA	NA	NA	NA	NA	NA	NA	NA	NA	NA	NA	NA	NA	NA	NA	NA	NA	NA
PRPF38A_P1P2	8.67179	NA	11.2806	NA	NA	NA	5.23941	NA	NA	NA	NA	19.2345	NA	-4.55543	NA	NA	NA	NA	NA	NA	NA	NA	NA	NA	NA	NA	NA	NA	NA	NA	NA	NA	NA	NA	NA	11.4416	NA	NA	NA	NA	54.8339	NA	NA	NA	NA	NA	NA	NA	NA
ATP5F1_P1P2	34.5846	NA	52.9091	NA	9.14122	-7.43526	37.2789	4.89876	NA	NA	NA	30.3463	NA	-8.6638	NA	NA	NA	13.8374	29.2425	-57.5374	-65.9996	NA	0.0160522	-23.6054	-64.4924	-56.5953	39.1597	-28.4932	-62.5883	-75.1771	-43.918	-59.9165	-56.7919	NA	NA	NA	NA	NA	NA	NA	NA	NA	NA	NA	NA	NA	NA	-25.1387	NA
DROSHA_P1P2	37.2496	NA	58.3003	NA	39.5965	-6.68132	59.3403	15.2277	NA	NA	NA	60.0294	NA	-12.7439	NA	NA	NA	NA	NA	NA	NA	NA	NA	NA	NA	NA	NA	NA	NA	NA	NA	NA	NA	NA	NA	4.96555	-6.01962	NA	NA	NA	5.74949	NA	NA	NA	NA	NA	NA	NA	NA
NFYC_P1P2	5.45614	NA	13.7201	25.7932	29.8697	NA	19.4001	NA	NA	-10.6942	NA	16.1765	NA	-30.8589	NA	NA	NA	NA	NA	NA	NA	NA	NA	NA	NA	NA	NA	NA	NA	NA	NA	NA	NA	NA	NA	NA	NA	NA	NA	NA	9.43448	-15.0983	-4.83274	NA	NA	NA	NA	NA	NA
MTCH2_P1P2	2.97286	NA	5.01981	0.677393	NA	NA	2.68321	NA	NA	NA	NA	2.48148	-2.0167	NA	NA	NA	NA	-2.47565	NA	NA	NA	NA	NA	NA	NA	NA	NA	NA	NA	NA	NA	NA	NA	NA	NA	NA	NA	NA	NA	NA	NA	NA	NA	NA	NA	NA	NA	-16.3555	NA
MCM4_P1P2	27.8524	NA	53.7113	NA	NA	NA	42.7576	-15.4077	NA	-2.50652	NA	53.9019	NA	NA	NA	NA	NA	NA	36.1288	-29.4381	-30.0185	-4.92495	-15.2418	-19.0462	-49.2594	-31.889	39.7632	-34.9522	-55.5702	-37.1807	-43.8169	-28.4787	-22.4098	NA	NA	6.07877	NA	NA	NA	NA	NA	NA	NA	NA	NA	NA	NA	NA	NA
GOLT1B_P1P2	23.448	NA	51.2485	NA	NA	NA	20.8075	NA	NA	NA	NA	59.5939	-3.1551	-31.0358	NA	NA	NA	NA	NA	NA	NA	NA	NA	NA	NA	NA	NA	NA	NA	NA	NA	NA	NA	NA	NA	NA	NA	NA	NA	NA	NA	NA	2.34972	NA	NA	NA	NA	NA	NA
RSL24D1_P1P2	36.6192	NA	52.5194	NA	-25.9176	-6.77531	24.2796	7.32523	NA	NA	NA	57.4044	NA	-10.8067	NA	NA	NA	NA	NA	NA	NA	NA	NA	NA	NA	NA	NA	NA	NA	NA	NA	NA	NA	NA	NA	6.03958	NA	NA	NA	NA	37.9569	NA	NA	NA	NA	NA	NA	NA	NA
AP2S1_P1P2	19.5081	NA	43.9603	NA	NA	NA	23.2508	NA	NA	-1.85449	NA	51.7647	NA	NA	NA	NA	NA	NA	NA	NA	NA	NA	NA	NA	NA	NA	NA	NA	NA	NA	NA	NA	NA	NA	NA	NA	NA	NA	NA	NA	8.85467	-15.7945	NA	NA	NA	NA	-2.82827	NA	NA
TMEM202_P1P2	6.05834	NA	8.54926	NA	NA	NA	NA	NA	NA	NA	NA	12.0948	NA	NA	NA	NA	NA	NA	NA	NA	NA	NA	NA	NA	NA	NA	NA	NA	NA	NA	NA	NA	NA	NA	NA	NA	NA	NA	NA	NA	NA	NA	2.41839	NA	NA	NA	NA	NA	NA
SUPT16H_P1P2	28.5506	-6.88569	43.6718	NA	NA	-5.59231	20.5481	NA	NA	-5.99188	NA	28.8235	-9.38949	-14.4556	NA	NA	NA	NA	NA	NA	NA	NA	NA	NA	NA	NA	NA	NA	NA	NA	NA	NA	NA	NA	NA	5.8416	NA	NA	NA	NA	NA	NA	NA	NA	NA	NA	NA	NA	NA
NUTF2_P1P2	8.57345	NA	33.3545	NA	34.4849	NA	12.3515	26.7869	NA	NA	NA	24.0405	NA	NA	NA	NA	NA	NA	NA	NA	NA	NA	NA	NA	NA	NA	NA	NA	NA	NA	NA	NA	NA	17.7051	NA	NA	NA	NA	NA	NA	NA	NA	NA	NA	NA	NA	NA	NA	NA
ADAT2_P1P2	12.8244	NA	21.0845	NA	-0.752421	-17.6517	24.9961	NA	NA	-3.04945	NA	22.5806	-5.5312	-6.9596	NA	NA	NA	NA	NA	NA	NA	NA	NA	NA	NA	NA	NA	NA	NA	NA	NA	NA	NA	NA	NA	NA	NA	NA	NA	NA	NA	NA	NA	NA	NA	NA	NA	NA	NA
PRSS51_P1P2	0.335937	NA	NA	NA	NA	NA	NA	NA	NA	NA	NA	NA	NA	NA	NA	NA	NA	NA	NA	NA	NA	NA	NA	NA	NA	NA	NA	NA	NA	NA	NA	NA	NA	NA	NA	NA	NA	NA	NA	NA	NA	NA	NA	NA	NA	NA	NA	NA	NA
PPIL4_P1P2	4.77657	NA	NA	NA	NA	NA	NA	NA	NA	NA	NA	14.429	-7.30228	-0.194289	NA	NA	NA	NA	NA	NA	NA	NA	NA	NA	NA	NA	NA	NA	NA	NA	NA	NA	NA	NA	NA	NA	NA	NA	NA	NA	NA	NA	NA	NA	NA	NA	NA	NA	NA
PELP1_P1P2	43.3091	NA	71.4298	NA	NA	NA	16.0493	15.4276	NA	-2.13606	NA	77.1663	-30.1636	NA	NA	NA	NA	NA	NA	NA	NA	NA	NA	NA	NA	NA	NA	NA	NA	NA	NA	NA	NA	11.857	-12.7284	7.94807	NA	NA	NA	NA	NA	NA	NA	NA	NA	NA	NA	NA	NA
TOPBP1_P1P2	17.5289	NA	27.5786	NA	NA	NA	12.5855	5.87759	NA	NA	NA	15.0599	NA	NA	NA	NA	NA	NA	NA	NA	NA	NA	NA	NA	NA	NA	NA	NA	NA	NA	NA	NA	NA	NA	NA	NA	NA	NA	NA	NA	NA	NA	NA	NA	NA	NA	NA	NA	NA
SYMPK_P1P2	22.1116	NA	47.3642	-20.4017	NA	NA	32.8692	9.3741	NA	-3.13772	NA	19.1083	-4.01693	NA	NA	NA	NA	NA	NA	NA	NA	NA	NA	NA	NA	NA	NA	NA	NA	NA	NA	NA	NA	11.5003	-13.4749	NA	-3.8635	NA	NA	NA	33.1019	NA	7.64773	NA	NA	NA	NA	NA	NA
PIK3AP1_P1	1.73467	NA	NA	NA	NA	NA	NA	NA	NA	NA	NA	NA	NA	NA	NA	NA	NA	NA	NA	NA	NA	NA	NA	NA	NA	NA	NA	NA	NA	NA	NA	NA	NA	NA	NA	NA	NA	NA	NA	NA	NA	NA	NA	NA	NA	NA	NA	NA	NA
ACTA1_P1	5.9634	NA	20.0349	NA	NA	NA	NA	NA	NA	NA	NA	NA	NA	NA	NA	NA	NA	NA	NA	NA	NA	NA	NA	NA	NA	NA	NA	NA	NA	NA	NA	NA	NA	NA	NA	NA	NA	NA	NA	NA	NA	NA	NA	NA	NA	NA	NA	NA	NA
NDUFB9_P1P2	4.7699	NA	7.25155	NA	NA	-6.86581	7.40725	NA	NA	NA	NA	NA	NA	NA	3.33437	-4.41924	NA	NA	NA	NA	NA	NA	NA	NA	NA	NA	NA	NA	NA	NA	NA	NA	NA	NA	NA	NA	NA	NA	NA	NA	NA	NA	NA	NA	NA	-12.9906	NA	-8.88257	NA
MTHFR_P2	8.16665	NA	NA	5.03582	NA	NA	NA	NA	NA	NA	NA	NA	NA	NA	NA	NA	NA	NA	NA	NA	NA	NA	NA	NA	NA	NA	NA	NA	NA	NA	NA	NA	NA	NA	NA	NA	NA	NA	NA	NA	NA	NA	NA	NA	NA	NA	NA	NA	NA
ZNF695_ENST00000339986.7	5.75951	NA	NA	NA	NA	NA	NA	NA	NA	NA	NA	NA	NA	NA	NA	NA	NA	NA	NA	NA	NA	NA	NA	NA	NA	NA	NA	NA	NA	NA	NA	NA	NA	NA	NA	NA	NA	NA	NA	NA	NA	NA	NA	NA	NA	NA	NA	NA	NA
MTRF1L_P1P2	6.66694	NA	7.94239	NA	NA	-7.42582	8.47058	NA	NA	2.50313	NA	43.0438	-6.45054	-9.06213	NA	NA	NA	NA	NA	NA	NA	NA	NA	NA	NA	NA	NA	NA	NA	NA	NA	NA	NA	NA	NA	NA	NA	NA	NA	NA	NA	NA	NA	NA	NA	NA	-3.22796	-7.6319	NA
ELP3_P1P2	16.4292	NA	19.7602	NA	-5.15614	NA	26.1892	5.6617	NA	-8.89293	NA	41.9039	-13.2381	NA	NA	NA	NA	NA	NA	NA	NA	NA	NA	NA	NA	NA	NA	NA	NA	NA	NA	NA	NA	NA	8.82115	NA	NA	NA	NA	NA	NA	NA	NA	NA	NA	NA	NA	-14.7881	NA
OBFC1_P1P2	5.8238	NA	17.6567	NA	-2.30338	NA	22.3632	NA	NA	-3.57771	NA	13.503	-15.1858	NA	32.6018	NA	6.36123	NA	NA	NA	NA	NA	NA	NA	NA	NA	NA	NA	NA	NA	NA	NA	NA	NA	NA	3.11179	NA	NA	NA	NA	NA	NA	NA	NA	NA	NA	NA	NA	NA
UXT_P1P2	21.2465	NA	46.3886	NA	NA	NA	32.5258	NA	NA	NA	NA	55.6548	-15.649	NA	NA	NA	NA	NA	NA	NA	NA	NA	NA	NA	NA	NA	NA	NA	NA	NA	NA	NA	NA	NA	NA	NA	NA	NA	NA	NA	NA	NA	NA	NA	NA	NA	NA	NA	5.55185
RPS12_P1P2	25.952	NA	34.9568	NA	NA	NA	15.3043	22.8938	NA	NA	NA	22.3691	NA	-5.85767	NA	NA	NA	NA	NA	NA	NA	NA	NA	NA	NA	NA	NA	NA	NA	NA	NA	NA	NA	NA	NA	5.31228	NA	NA	NA	NA	NA	NA	NA	NA	NA	NA	NA	NA	NA
GALNT4_P1	0.447977	NA	NA	NA	NA	NA	NA	NA	NA	NA	NA	NA	NA	NA	NA	NA	NA	NA	NA	NA	NA	NA	NA	NA	NA	NA	NA	NA	NA	NA	NA	NA	NA	NA	NA	NA	NA	NA	NA	NA	NA	NA	NA	NA	NA	NA	NA	NA	NA
HDAC5_P1P2	0.83564	NA	NA	NA	NA	NA	NA	NA	NA	NA	NA	NA	NA	NA	NA	NA	NA	NA	NA	NA	NA	NA	NA	NA	NA	NA	NA	NA	NA	NA	NA	NA	NA	NA	NA	NA	NA	NA	NA	NA	NA	NA	NA	NA	NA	NA	NA	NA	NA
GBE1_P1P2	2.43224	NA	5.29102	NA	NA	NA	NA	NA	NA	NA	NA	NA	NA	NA	NA	NA	NA	NA	NA	NA	NA	NA	NA	NA	NA	NA	NA	NA	NA	NA	NA	NA	NA	NA	NA	NA	NA	NA	NA	NA	NA	NA	NA	NA	NA	NA	NA	NA	NA
RNPC3_P1P2	26.2307	NA	48.2679	NA	NA	NA	24.9858	NA	NA	NA	NA	49.3607	NA	NA	NA	NA	NA	NA	NA	NA	NA	NA	NA	NA	NA	NA	NA	NA	NA	NA	NA	NA	NA	NA	NA	NA	NA	NA	NA	NA	5.72196	NA	NA	NA	NA	NA	NA	NA	NA
PRDX4_P1P2	5.27377	NA	11.8641	NA	NA	NA	8.31642	NA	NA	NA	NA	NA	NA	NA	9.74117	NA	NA	NA	NA	NA	NA	NA	NA	NA	NA	NA	NA	NA	NA	NA	NA	NA	NA	NA	NA	NA	NA	NA	NA	NA	NA	NA	NA	NA	NA	NA	NA	NA	NA
ATOH8_P1P2	3.28461	NA	NA	NA	NA	NA	NA	NA	NA	NA	NA	NA	NA	NA	NA	NA	NA	NA	NA	NA	NA	NA	NA	NA	NA	NA	NA	NA	NA	NA	NA	NA	NA	NA	NA	NA	NA	NA	NA	NA	NA	NA	NA	NA	NA	NA	NA	NA	NA
CHTF18_P1P2	3.98505	NA	6.85415	NA	NA	NA	11.6837	69.2203	NA	NA	NA	5.52011	NA	25.7989	NA	NA	NA	NA	NA	NA	NA	NA	NA	NA	NA	NA	NA	NA	NA	NA	NA	NA	NA	NA	NA	NA	NA	NA	NA	NA	6.61993	NA	-4.8176	NA	NA	NA	-3.23469	-5.89928	NA
LAMTOR3_P1P2	4.64067	-3.09867	5.98416	NA	NA	-3.84195	7.65314	NA	NA	NA	NA	19.2787	-3.49982	-4.13278	NA	NA	NA	NA	13.6578	-50.2567	-37.9177	-40.6378	-26.2744	-22.5842	-30.1663	NA	19.1562	-38.7915	-46.2145	-54.8825	-30.9605	-33.7708	-47.4274	NA	NA	NA	-11.1872	NA	NA	NA	NA	NA	NA	NA	NA	-5.04447	NA	NA	NA
TAF7_P1P2	10.1344	NA	21.449	NA	NA	-4.17305	13.3498	NA	NA	NA	NA	51.5077	NA	NA	NA	NA	NA	NA	NA	NA	NA	NA	NA	NA	NA	NA	NA	NA	NA	NA	NA	NA	NA	NA	NA	NA	NA	NA	NA	NA	NA	NA	NA	NA	NA	NA	NA	NA	NA
SEC61B_P1P2	2.94005	7.83595	8.18625	-7.817	NA	17.4979	3.6901	NA	NA	NA	NA	10.9023	NA	-1.30361	NA	NA	NA	NA	NA	NA	NA	NA	NA	NA	NA	NA	NA	NA	NA	NA	NA	NA	NA	NA	NA	NA	NA	NA	NA	NA	NA	NA	NA	NA	NA	NA	3.91086	NA	NA
GSS_P1P2	5.42519	6.17454	NA	3.43183	NA	26.8581	14.1989	4.81682	NA	NA	NA	NA	NA	NA	3.50738	NA	NA	NA	NA	NA	NA	NA	NA	NA	NA	NA	NA	NA	NA	NA	NA	NA	NA	NA	NA	NA	NA	NA	NA	NA	NA	NA	NA	NA	NA	NA	NA	NA	NA
DCTN6_P1P2	21.8761	NA	32.2403	7.51526	25.4178	NA	12.7482	12.8074	NA	NA	NA	55.5361	NA	-11.3036	NA	NA	NA	NA	NA	NA	NA	NA	NA	NA	NA	NA	NA	NA	NA	NA	NA	NA	NA	NA	NA	2.62768	NA	NA	NA	NA	62.5948	NA	NA	NA	NA	NA	NA	NA	NA
PACRG_P1P2	3.65067	NA	NA	NA	NA	NA	NA	NA	NA	NA	NA	NA	NA	NA	NA	NA	NA	NA	NA	NA	NA	NA	NA	NA	NA	NA	NA	NA	NA	NA	NA	NA	NA	NA	NA	NA	NA	NA	NA	NA	NA	NA	NA	NA	NA	NA	-3.82197	NA	NA
NDUFAF3_P1P2	7.54874	NA	NA	NA	NA	-4.00053	3.47081	NA	NA	NA	NA	NA	NA	NA	NA	NA	NA	NA	NA	NA	NA	NA	NA	NA	NA	NA	NA	NA	NA	NA	NA	NA	NA	NA	NA	NA	NA	NA	NA	NA	NA	NA	NA	NA	NA	NA	-3.71383	NA	NA
DHDDS_P1P2	12.0485	12.0989	26.1133	NA	NA	27.5806	16.1184	NA	NA	NA	NA	NA	NA	NA	NA	NA	NA	NA	NA	NA	NA	NA	NA	NA	NA	NA	NA	NA	NA	NA	NA	NA	NA	NA	10.6385	15.2504	NA	NA	NA	NA	15.8879	NA	NA	NA	NA	NA	NA	NA	NA
RACGAP1_P1P2	47.1384	NA	98.7453	NA	53.5982	NA	28.9293	6.04088	NA	-2.99524	NA	67.6593	NA	NA	NA	NA	NA	NA	NA	NA	NA	NA	NA	NA	NA	NA	NA	NA	NA	NA	NA	NA	NA	NA	NA	NA	NA	NA	NA	NA	72.7314	NA	NA	NA	NA	NA	NA	NA	NA
CFDP1_P1	29.565	NA	18.3097	-0.820733	NA	NA	15.4069	7.08173	NA	NA	NA	20.037	NA	NA	NA	NA	NA	NA	NA	NA	NA	NA	NA	NA	NA	NA	NA	NA	NA	NA	NA	NA	NA	NA	NA	NA	NA	NA	NA	NA	NA	NA	NA	NA	NA	NA	3.35206	NA	NA
HARS2_P1P2	24.6681	-12.0665	24.3632	NA	NA	-7.08977	29.5232	NA	NA	2.11874	NA	42.7106	NA	-7.57564	3.91348	NA	NA	NA	NA	NA	NA	NA	NA	NA	NA	NA	NA	NA	NA	NA	NA	NA	NA	NA	NA	NA	NA	NA	NA	NA	NA	NA	NA	NA	NA	NA	-6.517	-16.4755	NA
CENPK_P1P2	14.0395	NA	37.153	NA	NA	NA	17.0725	NA	NA	NA	NA	24.6725	NA	-5.1754	NA	NA	NA	NA	NA	NA	NA	NA	NA	NA	NA	NA	NA	NA	NA	NA	NA	NA	NA	NA	NA	NA	NA	NA	NA	NA	NA	NA	NA	NA	NA	NA	NA	NA	NA
FAM58A_P1P2	4.51766	NA	18.1312	NA	-2.54202	-5.24938	8.02855	NA	NA	NA	NA	18.7681	-0.194739	-1.12599	7.74132	NA	5.2911	NA	NA	NA	NA	NA	NA	NA	NA	NA	NA	NA	NA	NA	NA	NA	NA	NA	NA	NA	NA	NA	NA	NA	NA	NA	NA	NA	NA	NA	NA	NA	NA
DDX49_P1P2	8.73887	NA	13.278	NA	-11.8131	-5.20672	5.27371	6.22219	NA	NA	NA	18.6822	NA	-6.09904	NA	NA	NA	NA	NA	NA	NA	NA	NA	NA	NA	NA	NA	NA	NA	NA	NA	NA	NA	NA	NA	NA	NA	NA	NA	NA	16.6866	NA	NA	NA	NA	NA	NA	NA	NA
RPN1_P1P2	5.63436	NA	7.96635	NA	NA	NA	3.04589	NA	-7.84987	NA	NA	10.7675	NA	NA	NA	NA	NA	NA	NA	NA	NA	NA	NA	NA	NA	NA	NA	NA	NA	NA	NA	NA	NA	NA	13.2755	NA	NA	NA	NA	NA	NA	NA	NA	NA	NA	NA	NA	NA	NA
THOC5_P1P2	18.6781	NA	59.3886	NA	26.3799	NA	22.6809	NA	NA	NA	NA	65.926	NA	NA	NA	NA	NA	NA	NA	NA	NA	NA	NA	NA	NA	NA	NA	NA	NA	NA	NA	NA	NA	NA	NA	3.57687	NA	NA	NA	NA	13.7784	NA	NA	NA	NA	NA	NA	NA	NA
TUFM_P1P2	7.12124	-3.87882	22.7051	NA	NA	-7.58039	16.1795	NA	NA	4.70395	NA	58.4659	NA	NA	NA	NA	NA	NA	NA	NA	NA	NA	NA	NA	NA	NA	NA	NA	NA	NA	NA	NA	NA	15.1309	-15.3147	NA	-1.88131	NA	NA	NA	3.20905	NA	1.84075	NA	NA	-2.53888	NA	NA	NA
COX5A_P1P2	6.55062	NA	13.2416	NA	NA	NA	12.8592	NA	NA	NA	NA	19.3303	NA	-8.26445	9.45915	NA	NA	NA	11.9238	-48.0093	-36.7578	-21.5649	-11.4006	-8.79473	-19.3668	-28.3644	15.5904	-11.6323	-49.8052	-42.0694	-43.1315	-11.32	-30.0797	NA	NA	NA	-2.4545	NA	NA	NA	NA	NA	NA	NA	NA	-10.1297	NA	-6.52364	NA
ITPK1_P1P2	4.06993	NA	8.79875	NA	NA	NA	7.29851	NA	NA	NA	NA	14.883	NA	-3.44522	NA	NA	NA	NA	NA	NA	NA	NA	NA	NA	NA	NA	NA	NA	NA	NA	NA	NA	NA	NA	NA	NA	NA	NA	NA	NA	NA	NA	NA	NA	NA	NA	NA	NA	NA
S100A12_P2	2.10321	NA	NA	NA	NA	NA	NA	NA	NA	NA	NA	NA	NA	NA	NA	NA	NA	NA	NA	NA	NA	NA	NA	NA	NA	NA	NA	NA	NA	NA	NA	NA	NA	NA	NA	NA	NA	NA	NA	NA	NA	NA	1.60841	NA	NA	NA	NA	NA	NA
PRKDC_P1P2	2.6917	5.53361	NA	NA	NA	NA	24.605	-16.2539	NA	NA	NA	6.41744	-23.8399	NA	16.8017	NA	5.60848	NA	NA	NA	NA	NA	NA	NA	NA	NA	NA	NA	NA	NA	NA	NA	NA	NA	NA	NA	-1.54795	NA	NA	NA	NA	6.26004	NA	NA	NA	10.3859	NA	NA	NA
FAM149B1_P1P2	5.70428	NA	NA	NA	NA	NA	NA	NA	NA	NA	NA	NA	NA	NA	NA	NA	NA	NA	NA	NA	NA	NA	NA	NA	NA	NA	NA	NA	NA	NA	NA	NA	NA	NA	NA	NA	NA	NA	NA	NA	NA	NA	NA	NA	NA	NA	NA	NA	NA
SNRNP40_P1P2	6.1093	NA	6.20736	NA	NA	NA	6.01373	NA	NA	NA	NA	11.6485	NA	-5.71546	6.67467	NA	NA	NA	NA	NA	NA	NA	NA	NA	NA	NA	NA	NA	NA	NA	NA	NA	NA	NA	NA	NA	NA	NA	NA	NA	9.11182	NA	NA	NA	NA	NA	NA	NA	NA
SOD2_P1P2	5.77029	NA	4.78118	NA	NA	NA	8.16253	NA	NA	-3.6622	NA	NA	NA	NA	NA	NA	NA	NA	NA	NA	NA	NA	NA	NA	NA	NA	NA	NA	NA	NA	NA	NA	NA	NA	NA	NA	NA	NA	NA	NA	NA	NA	NA	NA	NA	NA	NA	NA	NA
CEBPG_P1P2	8.49708	NA	25.6805	NA	NA	-9.25067	14.787	NA	NA	NA	NA	66.8243	NA	NA	NA	NA	NA	NA	NA	NA	NA	NA	NA	NA	NA	NA	NA	NA	NA	NA	NA	NA	NA	NA	NA	NA	NA	NA	NA	NA	NA	NA	NA	NA	NA	NA	NA	NA	NA
PARL_P1P2	7.57704	-2.41476	3.75263	NA	-1.63156	-3.53862	NA	NA	NA	NA	NA	8.14332	-11.7998	NA	NA	-6.0737	NA	NA	NA	NA	NA	NA	NA	NA	NA	NA	NA	NA	NA	NA	NA	NA	NA	NA	NA	NA	NA	NA	NA	NA	5.17314	NA	NA	NA	NA	NA	-5.55175	-7.38577	NA
PGK1_P1P2	35.2319	-6.69569	48.7729	NA	NA	-29.2042	43.3673	-5.83584	NA	11.9922	NA	55.5568	-7.86808	-10.0763	NA	NA	NA	NA	39.3868	-49.8788	-48.2574	NA	-4.05626	-26.1971	-62.9083	-50.3391	43.2138	-40.3123	-49.8778	-76.3724	-50.9727	-35.6532	-42.9717	NA	NA	4.92072	-2.72902	NA	NA	NA	20.2025	NA	NA	NA	NA	15.7264	NA	NA	NA
NGRN_P1P2	5.82934	-1.76523	9.39908	3.48055	NA	-9.20271	14.7319	NA	NA	NA	NA	8.42151	NA	NA	NA	NA	NA	NA	NA	NA	NA	NA	NA	NA	NA	NA	NA	NA	NA	NA	NA	NA	NA	NA	NA	NA	NA	NA	NA	NA	NA	NA	NA	NA	NA	NA	NA	NA	NA
RPLP0_P1P2	19.1857	NA	56.1511	NA	10.7488	NA	28.5036	17.777	NA	NA	NA	28.4291	NA	-8.21804	NA	NA	NA	NA	NA	NA	NA	NA	NA	NA	NA	NA	NA	NA	NA	NA	NA	NA	NA	NA	NA	7.50044	NA	NA	NA	NA	NA	NA	NA	NA	NA	NA	NA	NA	NA
EWSR1_P1P2	3.17555	NA	8.93085	NA	NA	-4.63015	NA	16.5557	NA	2.83581	NA	4.77827	9.09649	20.6239	NA	NA	NA	-7.09165	NA	NA	NA	NA	NA	NA	NA	NA	NA	NA	NA	NA	NA	NA	NA	NA	NA	3.56245	-4.43567	NA	NA	NA	NA	NA	NA	NA	NA	NA	NA	NA	2.52704
DDX52_P1P2	45.7138	NA	61.0238	NA	-4.31581	NA	44.1548	28.398	NA	3.45106	NA	71.5603	-5.65397	-12.2052	NA	NA	NA	NA	NA	NA	NA	NA	NA	NA	NA	NA	NA	NA	NA	NA	NA	NA	NA	NA	NA	5.26552	-3.07578	NA	NA	NA	24.3971	NA	NA	NA	NA	NA	8.00974	NA	NA
TOMM22_P1P2	17.5927	NA	36.6804	NA	NA	-10.4263	29.2988	NA	NA	2.75933	NA	53.1964	-3.57333	-0.576452	NA	NA	NA	NA	33.2237	-34.5265	-22.5163	-8.50554	-14.9843	-13.6633	-41.1008	-14.1496	34.0714	NA	-28.897	-34.8682	-33.7991	-32.3708	-27.3411	NA	NA	NA	-11.2701	NA	NA	NA	11.7689	NA	NA	NA	NA	NA	-5.5289	NA	NA
NHP2L1_P1P2	2.95466	NA	NA	NA	NA	NA	NA	NA	NA	NA	NA	NA	NA	NA	NA	NA	NA	NA	NA	NA	NA	NA	NA	NA	NA	NA	NA	NA	NA	NA	NA	NA	NA	NA	NA	NA	NA	NA	NA	NA	24.9048	NA	NA	NA	NA	NA	NA	NA	NA
E4F1_P1P2	8.54248	NA	10.6495	NA	NA	-7.10865	7.5955	NA	NA	NA	NA	19.214	-20.9507	-7.27449	NA	NA	NA	NA	NA	NA	NA	NA	NA	NA	NA	NA	NA	NA	NA	NA	NA	NA	NA	NA	NA	NA	NA	NA	NA	NA	17.3234	NA	NA	NA	NA	NA	NA	NA	NA
ZWILCH_P1P2	4.02228	NA	NA	NA	NA	NA	NA	NA	NA	NA	NA	NA	NA	NA	NA	NA	NA	NA	NA	NA	NA	NA	NA	NA	NA	NA	NA	NA	NA	NA	NA	NA	NA	NA	NA	NA	NA	NA	NA	NA	NA	NA	NA	NA	NA	NA	NA	NA	NA
NDUFAB1_P1P2	46.2775	NA	57.8259	NA	11.1353	NA	36.104	8.57625	NA	NA	NA	69.643	NA	-12.291	NA	NA	NA	NA	27.3844	-48.1536	-37.1908	NA	NA	-15.6004	-31.055	-16.399	41.2217	-12.2471	-15.2829	-44.2896	-32.999	-23.4928	-22.3215	9.35921	-9.76024	9.03697	NA	NA	NA	NA	54.6135	NA	3.7863	NA	NA	NA	NA	-4.63019	NA
STYXL1_P1P2	0.392335	NA	NA	NA	NA	NA	NA	NA	NA	NA	NA	NA	NA	NA	NA	NA	NA	NA	NA	NA	NA	NA	NA	NA	NA	NA	NA	NA	NA	NA	NA	NA	NA	NA	NA	NA	NA	NA	NA	NA	NA	NA	NA	NA	NA	NA	NA	NA	NA
CEP57_P1P2	2.27094	NA	NA	NA	NA	NA	3.30067	NA	NA	NA	NA	NA	NA	NA	NA	NA	NA	NA	NA	NA	NA	NA	NA	NA	NA	NA	NA	NA	NA	NA	NA	NA	NA	NA	NA	NA	NA	NA	NA	NA	NA	NA	-1.5428	NA	NA	NA	NA	NA	NA
BLOC1S2_P1P2	1.84498	NA	2.51314	NA	NA	NA	NA	NA	NA	NA	NA	NA	NA	NA	NA	NA	NA	NA	NA	NA	NA	NA	NA	NA	NA	NA	NA	NA	NA	NA	NA	NA	NA	NA	NA	NA	NA	NA	NA	NA	NA	NA	NA	NA	NA	NA	NA	NA	NA
GINS2_P1P2	13.3438	NA	34.265	NA	NA	NA	13.5356	29.4671	NA	-5.18448	NA	50.6041	NA	-3.83029	NA	NA	NA	NA	NA	NA	NA	NA	NA	NA	NA	NA	NA	NA	NA	NA	NA	NA	NA	NA	NA	17.833	NA	NA	NA	NA	NA	NA	NA	NA	NA	NA	NA	NA	-7.27443
CHD2_P1	2.26984	NA	1.66521	NA	NA	NA	NA	NA	NA	5.71564	NA	NA	NA	NA	NA	NA	NA	NA	NA	NA	NA	NA	NA	NA	NA	NA	NA	NA	NA	NA	NA	NA	NA	NA	NA	NA	NA	NA	NA	NA	NA	NA	NA	NA	NA	NA	NA	NA	NA
ATIC_P1P2	50.3491	NA	73.7045	NA	NA	-9.52506	50.7501	NA	NA	NA	NA	84.5948	NA	-50.0303	NA	NA	NA	NA	NA	NA	NA	NA	NA	NA	NA	NA	NA	NA	NA	NA	NA	NA	NA	NA	NA	NA	NA	NA	NA	NA	NA	NA	NA	NA	NA	NA	NA	NA	NA
COX18_P1P2	3.16592	-3.73552	6.25442	NA	NA	-12.7948	NA	NA	NA	NA	NA	9.41393	NA	-4.72662	NA	NA	NA	NA	NA	NA	NA	NA	NA	NA	NA	NA	NA	NA	NA	NA	NA	NA	NA	NA	NA	NA	NA	NA	NA	NA	NA	NA	NA	NA	NA	NA	-8.68355	-4.9446	NA
RPL8_P1P2	32.8471	NA	80.3836	NA	NA	NA	40.1187	NA	NA	NA	NA	27.7467	NA	-12.6305	NA	NA	NA	NA	NA	NA	NA	NA	NA	NA	NA	NA	NA	NA	NA	NA	NA	NA	NA	NA	NA	8.89634	NA	NA	NA	NA	NA	NA	NA	NA	NA	NA	NA	NA	NA
DDX51_P1P2	11.8723	-6.97685	11.4455	NA	-6.96038	NA	NA	NA	NA	NA	NA	NA	NA	NA	NA	NA	NA	NA	13.9791	-16.2573	-7.59424	NA	NA	NA	NA	NA	25.286	NA	NA	-43.3224	NA	NA	NA	NA	NA	NA	NA	NA	NA	NA	NA	NA	NA	NA	NA	NA	NA	NA	NA
MRPS7_P1P2	10.763	-6.61178	21.7681	NA	NA	-8.00616	17.5204	NA	NA	16.4809	NA	46.1293	NA	-5.47436	5.21667	NA	NA	NA	NA	NA	NA	NA	NA	NA	NA	NA	NA	NA	NA	NA	NA	NA	NA	NA	NA	NA	NA	NA	NA	NA	NA	NA	NA	NA	NA	NA	-4.4502	-2.62145	NA
PYGM_P1P2	3.16702	NA	NA	NA	NA	NA	NA	NA	NA	NA	NA	NA	NA	NA	NA	NA	NA	NA	NA	NA	NA	NA	NA	NA	NA	NA	NA	NA	NA	NA	NA	NA	NA	NA	NA	NA	NA	NA	NA	NA	NA	NA	NA	NA	1.17777	NA	NA	NA	NA
WAPAL_P1P2	7.08856	18.4166	14.535	10.6344	NA	21.2064	3.92396	NA	NA	4.14674	NA	10.0151	20.6807	-19.7612	4.72737	NA	NA	NA	18.4168	-73.5523	-76.8605	-35.531	-29.7252	-40.1585	-105.186	-61.6381	24.1424	-54.0587	-131.646	-138.02	-60.9237	-64.4613	-97.0837	NA	NA	NA	NA	NA	NA	NA	NA	NA	NA	NA	NA	NA	NA	NA	NA
PDPK1_P1P2	8.51879	NA	21.5564	NA	-8.78063	6.47576	10.5304	NA	NA	NA	NA	16.528	3.52055	-6.1298	NA	NA	NA	NA	NA	NA	NA	NA	NA	NA	NA	NA	NA	NA	NA	NA	NA	NA	NA	NA	NA	NA	NA	NA	NA	NA	NA	NA	NA	NA	NA	16.8893	NA	NA	NA
HEATR1_P1P2	65.1616	NA	94.379	NA	NA	NA	68.9964	NA	3.90241	17.9483	NA	86.6602	NA	NA	NA	NA	NA	NA	NA	NA	NA	NA	NA	NA	NA	NA	NA	NA	NA	NA	NA	NA	NA	16.3471	-14.3642	16.6028	-12.911	NA	NA	NA	58.202	-8.9873	NA	NA	NA	NA	NA	NA	NA
C12orf42_ENST00000378113.2	5.20012	NA	5.73879	NA	NA	NA	NA	NA	NA	NA	NA	NA	NA	NA	NA	NA	NA	NA	NA	NA	NA	NA	NA	NA	NA	NA	NA	NA	NA	NA	NA	NA	NA	NA	NA	4.07645	NA	NA	NA	NA	NA	NA	NA	NA	NA	NA	NA	NA	NA
CSTF3_P1P2	43.2067	NA	50.7475	-36.6829	NA	NA	39.4618	11.6211	NA	NA	NA	51.8137	-4.5737	NA	NA	NA	NA	NA	NA	NA	NA	NA	NA	NA	NA	NA	NA	NA	NA	NA	NA	NA	NA	NA	NA	3.71769	NA	NA	NA	NA	6.66005	NA	8.43973	NA	NA	NA	-15.6062	-9.49722	NA
KLF16_P1P2	0.277122	NA	14.7061	20.2926	NA	NA	3.5494	11.2332	NA	NA	NA	5.88449	NA	NA	8.90202	NA	2.9228	NA	NA	NA	NA	NA	NA	NA	NA	NA	NA	NA	NA	NA	NA	NA	NA	NA	NA	NA	NA	NA	NA	NA	NA	NA	NA	NA	NA	NA	NA	NA	NA
RRM2_P1P2	34.7886	NA	71.0168	15.7203	9.92777	NA	43.1269	51.9388	NA	-22.9975	NA	31.7496	NA	-11.5349	NA	NA	NA	NA	NA	NA	NA	NA	NA	NA	NA	NA	NA	NA	NA	NA	NA	NA	NA	NA	NA	NA	-4.12865	NA	NA	NA	NA	NA	-1.86916	NA	NA	NA	NA	NA	NA
SCD_P1P2	8.40225	NA	19.0847	NA	NA	NA	5.19593	NA	NA	NA	NA	15.1368	NA	-6.07543	NA	NA	NA	NA	NA	NA	NA	NA	NA	NA	NA	NA	NA	NA	NA	NA	NA	NA	NA	NA	NA	NA	NA	NA	NA	NA	64.0859	-11.3222	NA	NA	NA	NA	NA	NA	NA
PUF60_P1P2	29.9776	NA	47.3048	NA	-10.7113	5.46635	36.9789	4.40106	NA	-4.33557	NA	44.2958	-20.5588	-4.43592	NA	NA	NA	NA	NA	NA	NA	NA	NA	NA	NA	NA	NA	NA	NA	NA	NA	NA	NA	10.9286	NA	14.2862	NA	NA	NA	NA	62.2515	NA	NA	NA	NA	NA	NA	NA	NA
FBXL7_P1P2	6.89348	NA	NA	NA	NA	NA	4.53102	NA	NA	NA	NA	24.1718	NA	-10.6414	NA	NA	NA	NA	NA	NA	NA	NA	NA	NA	NA	NA	NA	NA	NA	NA	NA	NA	NA	NA	NA	NA	NA	NA	NA	NA	NA	NA	NA	NA	NA	NA	NA	NA	NA
LIN28A_P1P2	3.57924	NA	NA	NA	NA	NA	NA	NA	NA	NA	NA	NA	NA	NA	NA	NA	NA	NA	NA	NA	NA	NA	NA	NA	NA	NA	NA	NA	NA	NA	NA	NA	NA	NA	NA	NA	NA	NA	NA	NA	NA	NA	NA	NA	NA	NA	NA	NA	NA
PSMD12_P1P2	9.99232	NA	44.9836	16.0117	34.6718	NA	15.4381	26.3598	NA	-3.53561	NA	15.6267	NA	-21.4004	5.13331	NA	NA	NA	18.9343	-54.1181	-41.1673	-15.3069	-20.695	-22.8491	-57.0036	-48.072	29.3596	-12.7109	-61.0511	-63.4481	-29.5147	NA	-66.271	NA	NA	14.5194	NA	NA	NA	NA	35.4942	NA	NA	NA	NA	NA	NA	NA	NA
ZNF259_P1P2	11.1404	NA	17.9945	NA	NA	NA	8.2835	NA	NA	NA	NA	18.7593	-4.45878	-7.51015	NA	NA	NA	NA	NA	NA	NA	NA	NA	NA	NA	NA	NA	NA	NA	NA	NA	NA	NA	NA	NA	NA	NA	NA	NA	NA	19.6264	NA	NA	NA	NA	NA	NA	NA	31.6901
H2AFB1_ENST00000354461.2	20.5929	NA	NA	NA	NA	NA	8.69488	NA	NA	NA	NA	51.0755	NA	-2.82063	NA	NA	NA	NA	NA	NA	NA	NA	NA	NA	NA	NA	NA	NA	NA	NA	NA	NA	NA	NA	NA	NA	NA	NA	NA	NA	NA	NA	NA	NA	NA	NA	NA	NA	NA
H2AFB3_ENST00000369444.2	20.5929	NA	NA	NA	NA	NA	8.69488	NA	NA	NA	NA	51.0755	NA	-2.82063	NA	NA	NA	NA	NA	NA	NA	NA	NA	NA	NA	NA	NA	NA	NA	NA	NA	NA	NA	NA	NA	NA	NA	NA	NA	NA	NA	NA	NA	NA	NA	NA	NA	NA	NA
H2AFB2_ENST00000354514.4	20.5929	NA	NA	NA	NA	NA	8.69488	NA	NA	NA	NA	51.0755	NA	-2.82063	NA	NA	NA	NA	NA	NA	NA	NA	NA	NA	NA	NA	NA	NA	NA	NA	NA	NA	NA	NA	NA	NA	NA	NA	NA	NA	NA	NA	NA	NA	NA	NA	NA	NA	NA
LIN9_P1P2	9.14145	NA	12.8788	NA	38.2494	NA	4.20879	NA	NA	NA	NA	19.971	NA	-1.23458	NA	NA	NA	NA	NA	NA	NA	NA	NA	NA	NA	NA	NA	NA	NA	NA	NA	NA	NA	5.87204	-3.61152	NA	NA	NA	NA	NA	NA	NA	NA	NA	NA	NA	NA	NA	NA
NUPL2_P1P2	0.880347	NA	NA	NA	NA	NA	2.31574	12.053	NA	NA	NA	NA	NA	NA	NA	NA	NA	NA	NA	NA	NA	NA	NA	NA	NA	NA	NA	NA	NA	NA	NA	NA	NA	NA	NA	NA	NA	NA	NA	NA	NA	NA	NA	NA	NA	NA	-5.20888	-3.78926	NA
RBM42_P1P2	16.5998	-1.195	38.0313	NA	24.6133	-26.2051	25.194	13.8283	NA	NA	NA	21.4758	-45.939	5.67021	12.5302	NA	NA	NA	NA	NA	NA	NA	NA	NA	NA	NA	NA	NA	NA	NA	NA	NA	NA	2.55659	NA	9.5704	-2.53785	NA	NA	NA	39.3338	NA	NA	NA	NA	NA	NA	NA	NA
TUBB_P1	34.5727	NA	113.436	NA	9.10713	NA	52.9275	NA	NA	NA	NA	102.39	NA	-11.9229	NA	NA	NA	NA	53.5092	5.63563	17.5661	86.1746	53.4607	-0.234892	46.085	-6.49973	52.4896	NA	60.2629	NA	76.1471	32.3839	NA	NA	NA	4.9749	NA	NA	NA	NA	39.818	NA	-8.3848	NA	NA	NA	NA	NA	NA
MGAM_P1P2	2.437	NA	NA	NA	NA	NA	NA	NA	NA	NA	NA	NA	NA	NA	NA	NA	NA	NA	NA	NA	NA	NA	NA	NA	NA	NA	NA	NA	NA	NA	NA	NA	NA	NA	NA	NA	NA	NA	NA	NA	NA	NA	NA	NA	NA	NA	NA	NA	NA
C1QTNF9B-AS1_P1P2	29.7093	-12.4931	45.4038	NA	NA	-31.0023	50.8548	NA	NA	NA	NA	55.3695	-13.6249	-19.9138	NA	NA	NA	NA	NA	NA	NA	NA	NA	NA	NA	NA	NA	NA	NA	NA	NA	NA	NA	NA	NA	NA	NA	NA	NA	NA	NA	NA	NA	NA	NA	NA	NA	NA	NA
COQ2_P1P2	39.0578	-9.52873	49.5781	NA	6.24264	-25.0123	31.9485	NA	NA	3.62747	NA	56.4757	NA	-10.0223	NA	33.4951	NA	NA	NA	NA	NA	NA	NA	NA	NA	NA	NA	NA	NA	NA	NA	NA	NA	14.4588	-6.48669	NA	-3.93173	NA	NA	NA	NA	NA	NA	NA	NA	NA	-3.37806	NA	NA
MTMR9_P1P2	11.98	-9.46014	23.2508	-12.0435	-7.56373	-20.5306	16.0692	NA	NA	NA	NA	7.31879	NA	-5.67734	NA	NA	3.26476	NA	15.818	-48.8383	-38.7426	-59.1296	-39.5495	-24.7343	-63.5024	-34.207	16.707	-42.9557	-55.1189	-59.7896	-42.5435	-28.7393	-47.2586	NA	NA	NA	NA	NA	NA	NA	NA	NA	NA	NA	NA	11.0422	NA	NA	NA
C1QBP_P1P2	6.02801	NA	10.0737	NA	NA	NA	NA	NA	NA	NA	NA	17.1764	NA	NA	4.39468	-8.50833	NA	NA	NA	NA	NA	NA	NA	NA	NA	NA	NA	NA	NA	NA	NA	NA	NA	NA	NA	NA	NA	NA	NA	NA	NA	NA	NA	NA	NA	NA	-2.91593	NA	NA
GJA10_ENST00000369352.1	4.63319	NA	NA	NA	NA	NA	NA	NA	NA	NA	NA	NA	NA	NA	NA	NA	NA	NA	NA	NA	NA	NA	NA	NA	NA	NA	NA	NA	NA	NA	NA	NA	NA	NA	NA	NA	NA	NA	NA	NA	NA	NA	1.52677	NA	NA	NA	NA	NA	NA
DPY30_P1P2	8.5096	12.5312	15.7128	-31.424	28.4581	9.80964	8.05561	NA	15.2366	5.32933	NA	19.4355	NA	-35.1315	NA	NA	NA	NA	NA	NA	NA	NA	NA	NA	NA	NA	NA	NA	NA	NA	NA	NA	NA	NA	NA	NA	-1.42726	NA	NA	NA	44.8856	NA	NA	NA	NA	NA	NA	NA	NA
GTF2F2_P1P2	15.284	NA	24.0495	NA	NA	NA	12.3423	NA	NA	NA	NA	22.3131	-4.78488	-6.37693	NA	NA	NA	NA	NA	NA	NA	NA	NA	NA	NA	NA	NA	NA	NA	NA	NA	NA	NA	NA	NA	NA	NA	NA	NA	NA	NA	NA	NA	NA	NA	NA	NA	NA	NA
C16orf86_P1P2	1.63438	NA	NA	NA	NA	NA	NA	NA	NA	NA	NA	NA	NA	NA	NA	NA	NA	NA	NA	NA	NA	NA	NA	NA	NA	NA	NA	NA	NA	NA	NA	NA	NA	NA	NA	NA	NA	NA	NA	NA	NA	NA	NA	NA	NA	NA	NA	NA	NA
EXOSC3_P1P2	40.1704	NA	54.5325	NA	NA	NA	51.3626	34.2898	NA	-14.7576	NA	58.455	NA	-8.02859	NA	NA	NA	NA	NA	NA	NA	NA	NA	NA	NA	NA	NA	NA	NA	NA	NA	NA	NA	9.09801	-14.0823	NA	NA	NA	NA	NA	23.5541	NA	NA	NA	NA	NA	NA	NA	NA
MRPL47_P1P2	6.80842	-3.3587	6.10339	NA	NA	NA	6.43584	NA	NA	NA	NA	8.50816	NA	NA	NA	NA	NA	NA	NA	NA	NA	NA	NA	NA	NA	NA	NA	NA	NA	NA	NA	NA	NA	NA	NA	NA	NA	NA	NA	NA	NA	NA	NA	NA	NA	NA	-5.55138	-4.11844	NA
CARF_P1P2	37.3448	NA	68.8129	NA	-5.84797	-6.16972	57.3961	NA	NA	NA	NA	81.554	-3.55597	-9.36104	NA	NA	NA	NA	NA	NA	NA	NA	NA	NA	NA	NA	NA	NA	NA	NA	NA	NA	NA	NA	NA	NA	NA	NA	NA	NA	NA	NA	NA	NA	NA	NA	NA	NA	NA
MED15_P1	6.59807	NA	9.17355	NA	-15.9721	NA	17.4959	-5.01497	NA	2.67939	NA	24.9823	NA	NA	NA	NA	NA	NA	NA	NA	NA	NA	NA	NA	NA	NA	NA	NA	NA	NA	NA	NA	NA	4.04624	-16.8313	NA	NA	NA	NA	NA	NA	NA	NA	NA	NA	NA	NA	NA	NA
SRSF1_P1P2	45.525	NA	61.0303	NA	37.49	NA	51.8773	27.93	2.5748	2.47349	NA	71.2108	NA	NA	NA	NA	NA	NA	NA	NA	NA	NA	NA	NA	NA	NA	NA	NA	NA	NA	NA	NA	NA	7.81638	NA	10.6552	NA	NA	NA	NA	58.7135	NA	NA	NA	NA	NA	NA	NA	NA
SMC4_P1	40.0216	NA	62.4967	NA	7.01032	NA	28.5965	11.3854	NA	-2.04315	NA	68.6098	NA	0.766891	NA	NA	NA	NA	NA	NA	NA	NA	NA	NA	NA	NA	NA	NA	NA	NA	NA	NA	NA	53.064	NA	6.13465	NA	NA	NA	NA	NA	NA	NA	NA	NA	NA	NA	NA	NA
ATRX_P1P2	2.76987	NA	6.52758	17.5037	-5.74146	NA	6.19459	NA	-5.7078	NA	NA	4.82231	3.22336	NA	5.16977	NA	4.07968	NA	13.3041	-36.6808	-37.4896	-22.8739	-27.4344	-20.4477	-52.7998	-25.5007	11.7459	-38.015	-55.4583	-40.4272	-39.2169	-19.5361	-42.9578	NA	NA	NA	NA	NA	NA	NA	NA	NA	NA	NA	NA	NA	NA	NA	-18.9173
METTL4_P1P2	14.4228	NA	24.4458	NA	NA	NA	15.9701	NA	NA	NA	NA	19.553	NA	-2.51235	NA	NA	NA	NA	NA	NA	NA	NA	NA	NA	NA	NA	NA	NA	NA	NA	NA	NA	NA	NA	NA	NA	NA	NA	NA	NA	NA	NA	NA	NA	NA	NA	NA	NA	NA
KIAA1109_P1P2	2.27728	NA	NA	NA	NA	-4.76441	NA	NA	NA	NA	NA	NA	NA	NA	NA	NA	NA	NA	NA	NA	NA	NA	NA	NA	NA	NA	NA	NA	NA	NA	NA	NA	NA	NA	NA	NA	NA	NA	NA	NA	NA	NA	NA	NA	NA	NA	NA	NA	NA
NEDD8-MDP1_P1P2	31.8712	-7.81177	37.8983	NA	-1.89492	-21.0057	48.0913	-17.4422	NA	NA	NA	94.2967	-4.57323	-3.96956	NA	-8.83897	NA	NA	NA	NA	NA	NA	NA	NA	NA	NA	NA	NA	NA	NA	NA	NA	NA	NA	-6.97188	NA	-7.17291	NA	NA	NA	60.5347	NA	NA	NA	NA	NA	NA	NA	NA
NEDD8_P1P2	44.545	-10.0204	60.6823	NA	-9.70575	-19.3919	53.0894	-17.4422	NA	NA	NA	94.2967	-4.57323	-3.96956	NA	-3.79597	NA	NA	NA	NA	NA	NA	NA	NA	NA	NA	NA	NA	NA	NA	NA	NA	NA	18.9087	-14.1193	NA	-11.9384	NA	NA	NA	82.0037	NA	NA	NA	NA	NA	NA	-18.2291	NA
WRNIP1_P1P2	1.4216	NA	NA	NA	NA	NA	NA	NA	NA	NA	NA	NA	NA	NA	NA	NA	NA	NA	NA	NA	NA	NA	NA	NA	NA	NA	NA	NA	NA	NA	NA	NA	NA	NA	NA	NA	NA	NA	NA	NA	NA	NA	NA	NA	NA	NA	NA	NA	NA
TBL3_P1P2	14.481	NA	20.6247	NA	-7.99208	NA	10.0568	26.9283	NA	NA	NA	52.3831	NA	-10.4687	NA	NA	NA	NA	NA	NA	NA	NA	NA	NA	NA	NA	NA	NA	NA	NA	NA	NA	NA	NA	NA	NA	NA	NA	NA	NA	24.5045	NA	NA	NA	NA	NA	7.40444	NA	NA
SEC24C_P1P2	2.86659	-3.9925	NA	-19.1897	NA	-13.9508	NA	NA	NA	NA	NA	0.913999	NA	-1.77243	NA	NA	NA	NA	NA	NA	NA	NA	NA	NA	NA	NA	NA	NA	NA	NA	NA	NA	NA	NA	NA	NA	NA	NA	NA	NA	NA	NA	NA	NA	NA	NA	-1.99689	NA	NA
GRID1_P1P2	5.02466	NA	NA	NA	NA	NA	NA	NA	NA	NA	NA	NA	NA	NA	NA	NA	NA	NA	NA	NA	NA	NA	NA	NA	NA	NA	NA	NA	NA	NA	NA	NA	NA	NA	NA	NA	NA	NA	NA	NA	NA	NA	NA	NA	NA	NA	NA	NA	NA
PSMG4_P1P2	9.05401	NA	21.044	6.91478	NA	NA	12.7484	NA	NA	NA	NA	NA	NA	NA	NA	NA	NA	NA	NA	NA	NA	NA	NA	NA	NA	NA	NA	NA	NA	NA	NA	NA	NA	NA	NA	NA	NA	NA	NA	NA	NA	NA	NA	-10.8331	NA	NA	NA	-8.64216	NA
BTF3_P1P2	12.9404	NA	19.6203	NA	NA	-19.6159	22.2015	NA	NA	NA	NA	15.891	-31.6866	-3.38947	NA	NA	NA	NA	11.3148	-45.5754	-27.7017	26.3638	6.20336	-16.2164	-44.1927	NA	20.4297	NA	-38.4328	-62.9716	-16.9237	-23.8182	-39.8016	NA	NA	5.49186	NA	NA	NA	NA	NA	NA	NA	NA	NA	NA	NA	-10.319	NA
LRRC3B_P1P2	9.73342	NA	NA	NA	NA	NA	NA	NA	NA	NA	NA	NA	NA	NA	NA	NA	NA	NA	NA	NA	NA	NA	NA	NA	NA	NA	NA	NA	NA	NA	NA	NA	NA	NA	NA	NA	NA	NA	NA	NA	NA	NA	NA	NA	NA	NA	NA	NA	NA
SF3A1_P1	16.3603	NA	93.6169	NA	NA	NA	24.8228	21.4383	NA	-3.04914	NA	31.4193	NA	NA	NA	NA	NA	NA	NA	NA	NA	NA	NA	NA	NA	NA	NA	NA	NA	NA	NA	NA	NA	105.456	-5.16237	23.1266	-9.00102	NA	NA	NA	117.556	NA	-9.08927	NA	NA	NA	NA	NA	NA
BCS1L_P1P2	14.9226	NA	25.4415	NA	NA	NA	14.8256	NA	NA	NA	NA	20.5048	NA	NA	NA	NA	NA	NA	NA	NA	NA	NA	NA	NA	NA	NA	NA	NA	NA	NA	NA	NA	NA	22.6328	NA	NA	NA	NA	NA	NA	6.9223	NA	NA	NA	NA	NA	NA	-21.4775	NA
NOM1_P1P2	4.7258	NA	NA	NA	NA	NA	NA	7.67282	NA	NA	NA	NA	NA	NA	NA	NA	NA	NA	NA	NA	NA	NA	NA	NA	NA	NA	NA	NA	NA	NA	NA	NA	NA	NA	NA	NA	NA	NA	NA	NA	NA	NA	NA	NA	NA	NA	NA	NA	NA
ATAD5_P1P2	4.7356	NA	17.7666	NA	NA	NA	10.1718	-20.0182	NA	NA	NA	8.92126	-13.3561	-38.1301	NA	NA	NA	NA	NA	NA	NA	NA	NA	NA	NA	NA	NA	NA	NA	NA	NA	NA	NA	NA	NA	NA	NA	NA	NA	NA	NA	NA	NA	NA	NA	NA	NA	NA	NA
GTF3C5_P1P2	6.25479	NA	NA	NA	NA	NA	NA	NA	NA	NA	NA	NA	NA	NA	NA	NA	NA	NA	NA	NA	NA	NA	NA	NA	NA	NA	NA	NA	NA	NA	NA	NA	NA	NA	NA	NA	NA	NA	NA	NA	NA	NA	NA	NA	NA	NA	NA	NA	NA
KIAA0100_P1P2	4.64999	NA	6.31314	NA	NA	NA	2.84925	NA	NA	NA	NA	4.20857	NA	NA	NA	NA	NA	NA	NA	NA	NA	NA	NA	NA	NA	NA	NA	NA	NA	NA	NA	NA	NA	NA	NA	NA	NA	NA	NA	NA	NA	NA	NA	NA	NA	NA	NA	NA	NA
ZNF219_P1P2	2.75191	NA	NA	NA	NA	NA	NA	NA	NA	NA	NA	9.90933	NA	-1.63279	NA	NA	11.0769	NA	NA	NA	NA	NA	NA	NA	NA	NA	NA	NA	NA	NA	NA	NA	NA	NA	NA	NA	NA	NA	NA	NA	NA	NA	NA	NA	NA	NA	NA	NA	NA
RPL37_P1P2	7.84751	NA	46.532	NA	NA	NA	12.3114	4.9825	NA	NA	NA	23.3899	-5.20251	NA	NA	NA	NA	NA	NA	NA	NA	NA	NA	NA	NA	NA	NA	NA	NA	NA	NA	NA	NA	NA	NA	12.8583	NA	NA	NA	NA	8.74268	NA	NA	NA	NA	NA	NA	NA	NA
CCT5_P1P2	17.0248	NA	14.2565	NA	NA	NA	17.9222	NA	NA	NA	NA	62.1992	-3.00343	NA	NA	NA	NA	NA	NA	NA	NA	NA	NA	NA	NA	NA	NA	NA	NA	NA	NA	NA	NA	NA	NA	7.60699	NA	NA	NA	NA	NA	NA	NA	NA	NA	NA	NA	NA	NA
RAET1G_P1P2	3.84959	NA	5.08504	NA	NA	NA	NA	NA	NA	NA	NA	NA	NA	-1.70982	NA	NA	7.78672	NA	NA	NA	NA	NA	NA	NA	NA	NA	NA	NA	NA	NA	NA	NA	NA	NA	NA	NA	NA	NA	NA	NA	NA	NA	2.77855	NA	NA	NA	NA	NA	NA
NOL7_P1P2	12.8914	NA	9.22455	NA	NA	NA	9.39699	16.804	NA	NA	NA	16.979	NA	-6.10082	NA	NA	NA	NA	NA	NA	NA	NA	NA	NA	NA	NA	NA	NA	NA	NA	NA	NA	NA	NA	NA	NA	NA	NA	NA	NA	NA	NA	NA	NA	NA	NA	NA	NA	NA
UTP11L_P1P2	15.0729	NA	27.2462	NA	-9.12297	NA	12.3202	NA	2.77937	NA	NA	59.3478	-3.55365	NA	NA	NA	NA	NA	NA	NA	NA	NA	NA	NA	NA	NA	NA	NA	NA	NA	NA	NA	NA	NA	NA	4.9575	-3.73123	NA	NA	NA	60.6055	NA	NA	NA	NA	NA	NA	NA	NA
CX3CL1_P1P2	4.86705	NA	NA	NA	NA	NA	NA	NA	NA	NA	NA	NA	NA	NA	NA	NA	NA	NA	NA	NA	NA	NA	NA	NA	NA	NA	NA	NA	NA	NA	NA	NA	NA	NA	NA	NA	NA	2.93816	2.94211	2.71724	NA	NA	3.77611	NA	NA	NA	NA	NA	NA
ZNF679_P1P2	1.82178	NA	NA	NA	NA	NA	NA	NA	NA	NA	NA	NA	NA	NA	NA	NA	NA	NA	NA	NA	NA	NA	NA	NA	NA	NA	NA	NA	NA	NA	NA	NA	NA	NA	NA	NA	NA	NA	NA	NA	NA	NA	NA	NA	NA	NA	NA	NA	NA
TSG101_P1P2	28.1257	NA	48.8004	NA	NA	NA	22.6349	NA	NA	NA	NA	50.027	NA	-3.37899	NA	NA	NA	NA	NA	NA	NA	NA	NA	NA	NA	NA	NA	NA	NA	NA	NA	NA	NA	NA	NA	NA	NA	NA	NA	NA	3.88205	NA	NA	NA	NA	NA	NA	NA	NA
RPAIN_P1P2	3.2041	NA	NA	NA	4.17436	NA	NA	NA	NA	NA	NA	NA	NA	NA	NA	NA	NA	NA	NA	NA	NA	NA	NA	NA	NA	NA	NA	NA	NA	NA	NA	NA	NA	NA	NA	9.71188	NA	NA	NA	NA	NA	NA	NA	NA	NA	NA	NA	NA	NA
PAM16_P1P2	12.5619	NA	36.0779	NA	NA	-2.16431	12.3753	NA	NA	NA	NA	60.3701	NA	NA	NA	NA	NA	NA	NA	NA	NA	NA	NA	NA	NA	NA	NA	NA	NA	NA	NA	NA	NA	NA	NA	9.05733	-9.76832	NA	NA	NA	41.3648	NA	2.38269	NA	NA	NA	-4.37403	-10.8186	NA
VMA21_P1P2	28.9757	NA	23.7134	NA	NA	NA	34.9534	NA	NA	NA	NA	70.9713	-4.48872	-5.92853	NA	NA	NA	NA	NA	NA	NA	NA	NA	NA	NA	NA	NA	NA	NA	NA	NA	NA	NA	NA	NA	NA	NA	NA	NA	NA	NA	NA	2.21099	NA	NA	NA	NA	NA	NA
OR1D5_ENST00000575751.1	0.0824662	NA	NA	NA	NA	NA	NA	NA	NA	NA	NA	NA	NA	NA	NA	NA	NA	NA	NA	NA	NA	NA	NA	NA	NA	NA	NA	NA	NA	NA	NA	NA	NA	NA	NA	NA	NA	NA	NA	NA	NA	NA	1.47715	NA	NA	NA	NA	NA	NA
ATP5E_P1P2	44.7017	NA	43.0636	NA	NA	NA	43.1176	NA	NA	NA	NA	63.2444	-6.32879	-9.42351	NA	NA	NA	29.5208	NA	NA	NA	NA	NA	NA	NA	NA	NA	NA	NA	NA	NA	NA	NA	NA	NA	NA	NA	NA	NA	NA	NA	NA	3.87761	NA	NA	NA	NA	-7.83455	NA
NDUFB10_P1P2	22.9717	-10.6438	24.7626	NA	NA	-15.274	12.1127	NA	NA	3.9407	NA	24.2296	NA	-9.66164	9.15037	NA	5.31811	NA	20.4258	-46.6736	-36.1015	-17.6665	-15.5389	-20.5188	-31.4295	NA	21.3794	-31.5402	-41.6772	-55.1782	-51.0954	-30.056	-38.9297	NA	NA	NA	NA	NA	NA	NA	6.53325	NA	7.61108	NA	NA	NA	NA	-8.12567	NA
EIF2B3_P1P2	66.3259	NA	100.853	6.55523	NA	NA	49.0602	NA	11.0776	9.81055	NA	114.25	NA	-15.6645	NA	NA	NA	NA	49.9472	-23.4224	-11.9079	NA	NA	-5.83023	-37.6523	-36.6629	49.7696	NA	-11.7197	-37.099	-29.0043	NA	-10.4324	80.4926	NA	21.325	-13.0323	NA	NA	NA	94.5282	NA	14.1401	NA	NA	NA	-7.73156	-6.50092	NA
MYB_P1P2	11.9939	7.88375	9.36549	6.40347	-16.7707	19.9171	9.54484	NA	10.6514	13.126	NA	14.9492	6.90922	NA	8.30896	NA	8.38441	NA	13.226	-55.7821	-50.4235	-4.23174	-23.4066	-28.583	-63.5321	-18.6182	20.2702	NA	-63.4023	-54.342	-63.9299	-61.7578	-48.8694	NA	NA	NA	NA	NA	NA	NA	NA	NA	NA	NA	NA	NA	NA	NA	NA
SMC6_P1P2	17.7005	NA	15.1422	NA	NA	NA	17.9815	24.2618	NA	NA	NA	48.7075	-3.36685	3.55169	NA	NA	NA	NA	NA	NA	NA	NA	NA	NA	NA	NA	NA	NA	NA	NA	NA	NA	NA	NA	NA	NA	NA	NA	NA	NA	NA	NA	NA	NA	NA	NA	NA	NA	NA
OCRL_P1P2	12.3377	NA	19.1177	NA	NA	NA	NA	NA	NA	NA	NA	56.0996	NA	-2.442	NA	NA	NA	NA	NA	NA	NA	NA	NA	NA	NA	NA	NA	NA	NA	NA	NA	NA	NA	NA	NA	NA	NA	NA	NA	NA	NA	NA	NA	NA	NA	NA	NA	NA	NA
CTDP1_P1P2	43.8212	NA	68.2547	4.20586	NA	NA	30.4648	NA	7.85279	2.09239	NA	69.8684	-25.5288	-35.7676	NA	NA	NA	NA	NA	NA	NA	NA	NA	NA	NA	NA	NA	NA	NA	NA	NA	NA	NA	22.0559	-20.5479	NA	NA	NA	NA	NA	NA	NA	NA	NA	NA	NA	NA	NA	NA
GEMIN8_P1P2	28.447	NA	41.9331	NA	NA	-8.87733	23.5107	NA	NA	NA	NA	54.5105	-20.6296	-9.61816	NA	NA	NA	NA	NA	NA	NA	NA	NA	NA	NA	NA	NA	NA	NA	NA	NA	NA	NA	NA	NA	NA	NA	NA	NA	NA	NA	NA	NA	NA	NA	NA	NA	NA	NA
TOMM20_P1P2	14.2366	NA	19.1521	NA	NA	NA	23.0527	NA	NA	2.14111	NA	63.9195	-5.65405	NA	NA	NA	NA	NA	NA	NA	NA	NA	NA	NA	NA	NA	NA	NA	NA	NA	NA	NA	NA	NA	NA	NA	NA	NA	NA	NA	NA	NA	2.91423	NA	NA	NA	-23.7497	-21.4225	NA
C16orf59_P1P2	19.0766	NA	24.5688	NA	NA	NA	25.1962	NA	NA	NA	NA	37.4498	-1.93374	-5.72779	14.9673	NA	NA	NA	NA	NA	NA	NA	NA	NA	NA	NA	NA	NA	NA	NA	NA	NA	NA	NA	NA	NA	NA	NA	NA	NA	17.061	NA	NA	NA	NA	NA	NA	NA	NA
ELN_P1P2	12.8953	NA	10.6328	NA	9.01507	NA	13.479	NA	NA	NA	NA	50.9835	NA	NA	NA	NA	NA	NA	NA	NA	NA	NA	NA	NA	NA	NA	NA	NA	NA	NA	NA	NA	NA	NA	NA	NA	NA	5.97562	2.5834	NA	NA	NA	NA	NA	NA	NA	NA	NA	NA
SRSF3_P1P2	42.1686	NA	46.114	9.03114	29.3497	36.6703	13.2758	17.4886	NA	NA	NA	55.3684	NA	NA	NA	NA	NA	NA	NA	NA	NA	NA	NA	NA	NA	NA	NA	NA	NA	NA	NA	NA	NA	48.3274	NA	12.6551	NA	NA	NA	NA	75.528	NA	NA	NA	NA	NA	NA	NA	NA
DDX39B_P1P2	23.4748	NA	46.4429	-6.39659	22.4999	NA	18.2326	29.0997	NA	NA	NA	23.4023	13.4626	-6.2133	NA	NA	NA	NA	NA	NA	NA	NA	NA	NA	NA	NA	NA	NA	NA	NA	NA	NA	NA	28.4972	NA	NA	NA	NA	NA	NA	17.8091	NA	NA	NA	NA	NA	NA	NA	NA
INPPL1_P1P2	7.40363	NA	4.1241	NA	NA	NA	6.60402	NA	NA	NA	NA	NA	NA	NA	7.94777	NA	11.3669	NA	16.2461	-62.0915	-65.4049	-57.649	-46.6143	-22.8306	-69.6688	-58.7294	19.5047	-51.2547	-99.0743	-76.8046	-56.6103	-57.4008	-67.3243	NA	NA	NA	NA	NA	NA	NA	NA	-3.71648	NA	NA	NA	NA	NA	NA	NA
SLC7A5_P1P2	8.33161	NA	NA	NA	NA	NA	7.24773	NA	NA	NA	NA	17.606	-8.75347	-20.4985	NA	NA	NA	NA	4.9208	-34.5925	-30.2384	NA	-5.85841	-7.11438	-19.4488	-16.7819	8.30699	-38.473	-44.2163	-55.5737	-18.658	-36.3186	-31.4157	NA	NA	NA	NA	NA	NA	NA	NA	NA	NA	NA	NA	NA	NA	NA	NA
GCSH_P1P2	5.35371	NA	NA	NA	NA	NA	3.99371	NA	NA	NA	NA	15.8904	NA	-3.88481	9.38317	NA	NA	NA	NA	NA	NA	NA	NA	NA	NA	NA	NA	NA	NA	NA	NA	NA	NA	NA	NA	NA	NA	NA	NA	NA	NA	NA	NA	NA	NA	NA	NA	NA	NA
RIF1_P1P2	17.0766	NA	15.7054	NA	NA	-7.37371	19.6004	41.1228	NA	-5.39614	NA	13.4886	-12.6327	20.3385	NA	12.5685	3.50598	4.18933	NA	NA	NA	NA	NA	NA	NA	NA	NA	NA	NA	NA	NA	NA	NA	NA	NA	NA	NA	NA	NA	NA	NA	NA	NA	NA	NA	NA	NA	NA	NA
SRSF7_P1P2	18.6488	NA	31.3006	NA	4.92428	NA	21.9325	5.28759	NA	NA	NA	20.5241	-3.6204	14.5458	NA	NA	NA	NA	NA	NA	NA	NA	NA	NA	NA	NA	NA	NA	NA	NA	NA	NA	NA	NA	NA	NA	NA	NA	NA	NA	NA	-5.43629	NA	NA	NA	NA	NA	NA	NA
XRCC3_P1P2	9.3466	NA	12.6814	NA	NA	NA	9.24116	NA	NA	NA	NA	17.3553	-3.26729	NA	NA	NA	NA	NA	NA	NA	NA	NA	NA	NA	NA	NA	NA	NA	NA	NA	NA	NA	NA	NA	NA	4.125	NA	NA	NA	NA	NA	NA	NA	NA	NA	NA	NA	NA	NA
RORA_ENST00000335670.6	4.12967	NA	NA	NA	NA	NA	NA	NA	NA	NA	NA	NA	NA	NA	NA	NA	NA	NA	NA	NA	NA	NA	NA	NA	NA	NA	NA	NA	NA	NA	NA	NA	NA	NA	NA	NA	NA	NA	NA	NA	NA	NA	NA	NA	NA	NA	NA	NA	NA
DNASE1L1_P2	18.6577	-14.3149	20.9657	NA	3.18288	-12.6817	24.3409	4.01564	NA	NA	NA	NA	NA	NA	NA	NA	NA	NA	23.4594	-60.1788	-44.012	-5.82156	-5.5403	-24.7113	-54.0434	-27.3147	23.6169	-53.6354	-74.0911	-92.8027	-56.3325	-28.2534	-67.8026	NA	NA	NA	NA	NA	NA	NA	NA	NA	NA	NA	NA	NA	-1.21341	-8.9857	NA
RPS14_P1P2	45.2219	NA	84.0439	NA	NA	NA	58.497	47.9803	NA	NA	NA	75.9589	NA	NA	NA	NA	NA	NA	NA	NA	NA	NA	NA	NA	NA	NA	NA	NA	NA	NA	NA	NA	NA	65.6938	NA	12.508	-7.64962	NA	NA	NA	76.7405	NA	NA	NA	NA	NA	NA	NA	NA
CPSF6_P1P2	6.16165	NA	30.3581	NA	NA	NA	15.018	5.0619	NA	NA	NA	42.3513	NA	-22.9681	NA	NA	NA	NA	25.6722	-62.0263	-36.7776	-2.72824	NA	-26.7746	-61.2426	-41.3214	29.875	NA	-21.1307	-65.9486	-22.6849	-48.451	-29.9785	NA	NA	NA	NA	NA	NA	NA	16.9334	NA	NA	NA	NA	NA	NA	NA	NA
ZNF143_P1P2	10.3048	NA	21.0736	NA	NA	NA	10.6192	NA	NA	NA	NA	19.8199	NA	NA	NA	NA	NA	NA	NA	NA	NA	NA	NA	NA	NA	NA	NA	NA	NA	NA	NA	NA	NA	NA	NA	NA	NA	NA	NA	NA	NA	NA	NA	NA	NA	NA	NA	NA	NA
ATP5I_P1P2	38.9524	-4.08973	48.8991	NA	NA	NA	29.5775	5.39517	NA	NA	NA	57.8148	NA	-9.00572	NA	NA	NA	28.8355	NA	NA	NA	NA	NA	NA	NA	NA	NA	NA	NA	NA	NA	NA	NA	NA	NA	2.59792	-5.9991	NA	NA	NA	NA	NA	11.3279	NA	NA	NA	-4.32933	-31.8972	NA
POLR2F_P1P2	16.5216	NA	40.5514	NA	NA	NA	7.86273	NA	NA	NA	NA	22.0369	-3.93523	-11.0963	NA	2.87844	NA	NA	NA	NA	NA	NA	NA	NA	NA	NA	NA	NA	NA	NA	NA	NA	NA	NA	NA	NA	NA	NA	NA	NA	NA	NA	NA	NA	NA	NA	NA	NA	NA
GEMIN2_P1P2	51.623	NA	71.9556	NA	NA	NA	54.4299	2.31563	NA	NA	NA	80.1473	-32.5685	-9.55238	NA	NA	NA	NA	NA	NA	NA	NA	NA	NA	NA	NA	NA	NA	NA	NA	NA	NA	NA	NA	NA	5.83058	NA	NA	NA	NA	14.5043	NA	NA	NA	NA	NA	NA	NA	NA
ZCCHC11_P1P2	7.80309	NA	NA	NA	NA	NA	NA	NA	NA	-5.33753	NA	17.2141	-5.11518	-4.6827	NA	NA	NA	NA	NA	NA	NA	NA	NA	NA	NA	NA	NA	NA	NA	NA	NA	NA	NA	NA	NA	NA	NA	NA	NA	NA	NA	NA	NA	NA	NA	NA	NA	NA	NA
RUVBL2_P1P2	20.9993	NA	45.4763	NA	NA	NA	7.14302	NA	NA	NA	NA	25.8445	NA	NA	NA	NA	NA	NA	NA	NA	NA	NA	NA	NA	NA	NA	NA	NA	NA	NA	NA	NA	NA	NA	NA	NA	NA	NA	NA	NA	NA	NA	NA	NA	NA	NA	NA	NA	NA
MCEE_P1P2	9.35596	NA	20.685	NA	NA	NA	9.45431	NA	NA	NA	NA	19.3359	NA	-5.07198	NA	NA	NA	NA	NA	NA	NA	NA	NA	NA	NA	NA	NA	NA	NA	NA	NA	NA	NA	NA	NA	NA	NA	NA	NA	NA	NA	NA	NA	NA	NA	NA	NA	NA	NA
MED16_P1P2	13.6721	7.43731	27.6261	NA	-5.56049	32.2994	13.4343	NA	NA	3.01868	NA	21.8129	4.51263	-9.31579	10.5655	NA	NA	NA	22.1313	-78.9775	-67.6759	-50.593	-51.1229	-39.047	-92.2122	-65.016	26.206	-62.9655	-117.11	-120.534	-76.462	-66.3521	-94.7603	8.02402	-23.5263	NA	NA	NA	NA	NA	NA	NA	NA	NA	NA	NA	NA	NA	NA
C19orf35_P1P2	1.79502	NA	NA	NA	NA	NA	NA	NA	NA	NA	NA	NA	NA	NA	NA	NA	NA	NA	NA	NA	NA	NA	NA	NA	NA	NA	NA	NA	NA	NA	NA	NA	NA	NA	NA	NA	NA	NA	NA	NA	NA	NA	NA	NA	NA	NA	NA	NA	NA
RDM1_P1P2	1.02338	NA	NA	NA	NA	NA	NA	NA	NA	NA	NA	NA	NA	NA	NA	NA	NA	NA	NA	NA	NA	NA	NA	NA	NA	NA	NA	NA	NA	NA	NA	NA	NA	NA	NA	NA	NA	NA	NA	NA	NA	NA	NA	NA	NA	NA	NA	NA	NA
POP1_P1P2	50.135	NA	43.9958	NA	-6.42982	NA	24.3994	12.2431	NA	-10.8174	NA	80.2279	NA	NA	NA	NA	NA	NA	NA	NA	NA	NA	NA	NA	NA	NA	NA	NA	NA	NA	NA	NA	NA	NA	-4.73655	3.9594	NA	NA	NA	NA	54.1994	NA	NA	NA	NA	NA	16.9536	NA	NA
CCDC157_P1P2	10.3784	NA	27.6371	NA	NA	NA	NA	9.9943	NA	NA	NA	62.7872	NA	NA	NA	NA	NA	NA	NA	NA	NA	NA	NA	NA	NA	NA	NA	NA	NA	NA	NA	NA	NA	41.8258	NA	NA	NA	NA	NA	NA	108.505	NA	NA	NA	NA	NA	NA	NA	NA
SPCS3_P1	14.9297	NA	31.8522	NA	NA	NA	21.1109	NA	NA	NA	NA	28.8733	NA	NA	NA	NA	NA	NA	NA	NA	NA	NA	NA	NA	NA	NA	NA	NA	NA	NA	NA	NA	NA	NA	NA	NA	NA	NA	NA	NA	NA	NA	NA	NA	NA	NA	NA	-5.31512	NA
HSPA8_P1P2	14.4061	NA	15.1623	NA	-5.64498	NA	4.57146	7.5205	NA	1.36796	NA	17.871	NA	-3.77767	NA	NA	NA	NA	NA	NA	NA	NA	NA	NA	NA	NA	NA	NA	NA	NA	NA	NA	NA	NA	NA	NA	NA	NA	NA	NA	NA	NA	NA	NA	NA	NA	NA	-11.7758	NA
PDE4A_P1	2.42896	NA	NA	NA	NA	NA	NA	NA	NA	NA	NA	NA	NA	NA	NA	NA	NA	NA	NA	NA	NA	NA	NA	NA	NA	NA	NA	NA	NA	NA	NA	NA	NA	NA	NA	NA	NA	NA	NA	NA	NA	NA	NA	NA	NA	NA	NA	NA	NA
ORC2_P1P2	12.0084	NA	17.8146	NA	NA	NA	17.6052	-12.8105	NA	NA	NA	53.1724	-10.1691	NA	8.73382	NA	NA	NA	NA	NA	NA	NA	NA	NA	NA	NA	NA	NA	NA	NA	NA	NA	NA	NA	NA	NA	NA	NA	NA	NA	NA	NA	NA	NA	NA	NA	-8.43957	NA	NA
MIOS_P1P2	18.834	NA	16.1848	NA	NA	NA	13.8097	NA	NA	NA	NA	15.6297	-11.2777	-17.2356	NA	NA	NA	NA	NA	NA	NA	NA	NA	NA	NA	NA	NA	NA	NA	NA	NA	NA	NA	NA	NA	NA	NA	NA	NA	NA	NA	NA	NA	NA	NA	NA	NA	NA	NA
SYS1_P1P2	6.31493	NA	NA	NA	NA	NA	NA	NA	NA	NA	NA	25.9533	NA	-11.1835	NA	NA	NA	NA	NA	NA	NA	NA	NA	NA	NA	NA	NA	NA	NA	NA	NA	NA	NA	NA	NA	NA	NA	NA	NA	NA	NA	NA	NA	NA	NA	NA	NA	NA	NA
EXOC1_P1P2	5.51504	-2.98198	9.3753	NA	NA	-2.71069	6.12408	NA	NA	NA	NA	9.26426	-1.5714	NA	NA	NA	NA	NA	NA	NA	NA	NA	NA	NA	NA	NA	NA	NA	NA	NA	NA	NA	NA	NA	NA	5.44857	NA	NA	NA	NA	NA	NA	NA	NA	NA	NA	-3.42172	NA	NA
AHCY_P1P2	8.14578	NA	8.64255	NA	NA	NA	11.2295	NA	NA	NA	NA	24.922	NA	-4.03248	NA	NA	NA	NA	NA	NA	NA	NA	NA	NA	NA	NA	NA	NA	NA	NA	NA	NA	NA	NA	NA	NA	NA	NA	NA	NA	NA	NA	NA	NA	NA	32.1741	6.83847	7.09072	NA
DDX41_P1P2	54.3892	NA	98.1408	NA	NA	NA	77.5682	NA	NA	-10.0636	NA	77.2861	NA	NA	NA	NA	NA	NA	NA	NA	NA	NA	NA	NA	NA	NA	NA	NA	NA	NA	NA	NA	NA	NA	NA	10.464	NA	NA	NA	NA	14.3769	NA	NA	NA	NA	NA	NA	NA	NA
CENPM_P1P2	42.7817	NA	59.3834	NA	22.4604	NA	43.2187	10.6909	NA	NA	NA	57.387	NA	-11.3156	NA	NA	NA	NA	NA	NA	NA	NA	NA	NA	NA	NA	NA	NA	NA	NA	NA	NA	NA	19.8079	NA	NA	NA	NA	NA	NA	51.3044	NA	NA	NA	NA	NA	NA	NA	NA
INSIG1_P1P2	4.95434	NA	12.8393	NA	NA	NA	6.16692	NA	NA	NA	NA	7.82216	NA	-21.9579	23.3196	NA	11.4075	NA	NA	NA	NA	NA	NA	NA	NA	NA	NA	NA	NA	NA	NA	NA	NA	NA	NA	NA	NA	NA	NA	NA	NA	NA	NA	NA	NA	NA	NA	NA	NA
IBA57_P1P2	2.95562	NA	NA	NA	NA	NA	NA	NA	NA	NA	NA	NA	NA	NA	NA	NA	NA	NA	NA	NA	NA	NA	NA	NA	NA	NA	NA	NA	NA	NA	NA	NA	NA	NA	NA	NA	NA	NA	NA	NA	NA	NA	NA	NA	NA	NA	-5.31284	NA	NA
GTF3A_P1P2	8.05155	NA	13.7287	NA	NA	NA	NA	NA	NA	NA	NA	50.3384	NA	NA	NA	NA	NA	NA	NA	NA	NA	NA	NA	NA	NA	NA	NA	NA	NA	NA	NA	NA	NA	NA	NA	NA	NA	NA	NA	NA	NA	NA	NA	NA	NA	NA	NA	NA	NA
RPS11_P1P2	21.9662	NA	49.1492	NA	NA	NA	33.9762	26.8196	NA	NA	NA	30.5901	NA	-3.80502	NA	NA	NA	NA	NA	NA	NA	NA	NA	NA	NA	NA	NA	NA	NA	NA	NA	NA	NA	NA	NA	15.687	NA	NA	NA	NA	77.9518	NA	NA	NA	NA	NA	NA	NA	NA
DDX3X_P1P2	9.28015	NA	13.5504	NA	24.271	NA	13.2207	NA	NA	NA	NA	18.3742	NA	-10.4501	NA	NA	NA	NA	NA	NA	NA	NA	NA	NA	NA	NA	NA	NA	NA	NA	NA	NA	NA	NA	NA	NA	NA	NA	NA	NA	NA	NA	NA	NA	NA	NA	-2.57859	-16.5869	NA
WDR59_P1P2	6.84934	NA	NA	NA	NA	NA	6.38628	NA	NA	NA	NA	NA	NA	NA	NA	NA	NA	NA	NA	NA	NA	NA	NA	NA	NA	NA	NA	NA	NA	NA	NA	NA	NA	NA	NA	NA	NA	NA	NA	NA	NA	NA	NA	NA	NA	NA	NA	-2.7989	NA
RPL28_P1P2	28.0899	-8.51438	47.164	9.89452	-51.1215	-13.4545	34.6815	7.84147	NA	3.08061	NA	28.9641	NA	-4.76701	NA	NA	NA	NA	28.1603	-40.092	-43.9859	20.6041	NA	-10.8045	-14.7749	-39.1937	32.3978	-50.6624	-83.0915	-98.2183	-10.2981	-22.9178	-55.6628	NA	NA	6.30482	NA	NA	NA	NA	NA	NA	NA	NA	NA	NA	6.30082	NA	NA
GLRX3_P1P2	1.95772	NA	NA	14.6185	NA	NA	18.5877	NA	NA	NA	NA	NA	NA	NA	11.9594	NA	9.57735	NA	NA	NA	NA	NA	NA	NA	NA	NA	NA	NA	NA	NA	NA	NA	NA	NA	NA	3.64602	NA	NA	NA	NA	NA	NA	NA	NA	NA	NA	NA	NA	NA
NDUFA5_P1P2	9.91736	-10.8835	5.87696	NA	NA	-5.15225	3.30179	NA	NA	NA	NA	10.2067	3.79935	NA	NA	NA	NA	NA	NA	NA	NA	NA	NA	NA	NA	NA	NA	NA	NA	NA	NA	NA	NA	2.26672	-3.24737	NA	NA	NA	NA	NA	NA	NA	NA	NA	NA	-8.80944	NA	NA	NA
RIC8B_P1P2	2.28032	NA	NA	NA	NA	NA	NA	NA	NA	NA	NA	NA	NA	NA	NA	NA	NA	NA	NA	NA	NA	NA	NA	NA	NA	NA	NA	NA	NA	NA	NA	NA	NA	NA	NA	NA	NA	NA	NA	NA	NA	NA	NA	NA	NA	NA	NA	NA	NA
RPS19BP1_P1P2	22.3446	-3.38098	26.0085	NA	-5.25053	NA	23.7899	23.1801	NA	NA	NA	64.0926	-4.39666	-16.5701	NA	NA	NA	NA	NA	NA	NA	NA	NA	NA	NA	NA	NA	NA	NA	NA	NA	NA	NA	NA	NA	8.48665	NA	NA	NA	NA	23.1697	NA	NA	NA	NA	NA	6.7811	NA	NA
FAM153A_ENST00000440605.3	3.07061	NA	NA	NA	-3.39888	NA	NA	NA	NA	NA	NA	NA	NA	NA	NA	NA	4.68603	NA	NA	NA	NA	NA	NA	NA	NA	NA	NA	NA	NA	NA	NA	NA	NA	NA	NA	NA	NA	NA	NA	NA	NA	NA	NA	NA	NA	NA	NA	NA	NA
NUP85_P1P2	30.8767	NA	58.2086	NA	17.1822	NA	31.3027	3.99181	NA	NA	NA	55.9063	NA	NA	NA	NA	NA	NA	NA	NA	NA	NA	NA	NA	NA	NA	NA	NA	NA	NA	NA	NA	NA	NA	NA	6.08673	-4.03207	NA	NA	NA	33.5673	NA	3.57507	NA	NA	NA	NA	NA	7.59275
ZRSR2_P1P2	10.0274	NA	20.0343	NA	26.0961	NA	18.926	NA	NA	NA	NA	8.422	NA	NA	6.38941	NA	NA	NA	NA	NA	NA	NA	NA	NA	NA	NA	NA	NA	NA	NA	NA	NA	NA	NA	NA	NA	NA	NA	NA	NA	NA	NA	NA	NA	NA	NA	NA	NA	NA
MRPS18C_P1P2	3.36333	NA	5.92438	NA	-2.20621	-6.35886	6.6948	NA	NA	NA	NA	13.6473	NA	-3.07874	NA	NA	NA	NA	NA	NA	NA	NA	NA	NA	NA	NA	NA	NA	NA	NA	NA	NA	NA	NA	NA	NA	NA	NA	NA	NA	NA	NA	NA	NA	NA	NA	-3.42767	NA	NA
PSMC1_P1P2	23.8448	NA	53.9952	23.8889	35.1751	NA	32.128	22.8798	NA	-11.7389	NA	60.5672	NA	-6.98323	NA	NA	NA	NA	NA	NA	NA	NA	NA	NA	NA	NA	NA	NA	NA	NA	NA	NA	NA	12.4725	NA	12.533	-8.61643	NA	NA	NA	NA	NA	-6.43942	NA	NA	NA	NA	NA	NA
MED27_P1P2	22.56	NA	51.2504	NA	NA	NA	35.1044	NA	NA	NA	NA	67.9947	NA	-16.9904	NA	NA	NA	NA	NA	NA	NA	NA	NA	NA	NA	NA	NA	NA	NA	NA	NA	NA	NA	NA	NA	NA	NA	NA	NA	NA	NA	NA	NA	NA	NA	NA	NA	NA	NA
CCDC137_P1P2	14.5786	-9.15582	24.6403	NA	-31.8548	-18.9442	19.3809	NA	NA	NA	NA	16.5373	-11.6419	-4.6009	NA	NA	NA	NA	NA	NA	NA	NA	NA	NA	NA	NA	NA	NA	NA	NA	NA	NA	NA	NA	NA	NA	NA	NA	NA	NA	5.0061	NA	NA	NA	NA	NA	NA	NA	NA
PRPSAP2_P1	4.67539	NA	7.96695	NA	-3.14657	NA	4.27567	NA	NA	NA	NA	7.64832	NA	NA	NA	NA	NA	NA	NA	NA	NA	NA	NA	NA	NA	NA	NA	NA	NA	NA	NA	NA	NA	NA	NA	NA	NA	NA	NA	NA	NA	NA	NA	NA	NA	NA	NA	NA	NA
TWISTNB_P1P2	47.8424	NA	106.747	NA	NA	NA	60.1186	NA	4.8361	7.36581	NA	68.3931	NA	NA	NA	NA	NA	NA	NA	NA	NA	NA	NA	NA	NA	NA	NA	NA	NA	NA	NA	NA	NA	79.7677	-11.6681	21.5834	NA	NA	NA	NA	98.036	NA	NA	NA	NA	NA	NA	NA	NA
UBA52_P1	13.5662	NA	49.5525	NA	-4.27471	NA	34.5726	3.68442	NA	NA	NA	59.6167	NA	0.0232841	NA	NA	NA	NA	NA	NA	NA	NA	NA	NA	NA	NA	NA	NA	NA	NA	NA	NA	NA	NA	NA	8.32361	NA	NA	NA	NA	41.1661	NA	NA	NA	NA	NA	NA	NA	NA
TSEN2_P1P2	33.8497	NA	51.668	NA	NA	-10.8596	53.7795	NA	NA	NA	NA	87.2067	-26.4681	-17.1156	NA	NA	NA	NA	NA	NA	NA	NA	NA	NA	NA	NA	NA	NA	NA	NA	NA	NA	NA	NA	NA	NA	-4.38596	NA	NA	NA	28.7776	NA	NA	NA	NA	NA	-8.15699	-9.54749	NA
PDDC1_P1P2	6.99088	NA	13.4033	NA	NA	NA	10.359	NA	NA	NA	NA	NA	NA	NA	NA	NA	NA	NA	NA	NA	NA	NA	NA	NA	NA	NA	NA	NA	NA	NA	NA	NA	NA	NA	NA	NA	NA	NA	NA	NA	NA	NA	NA	NA	NA	NA	NA	NA	NA
TCOF1_P1P2	16.4162	NA	34.2485	NA	-18.8855	-5.7702	31.2501	NA	NA	NA	NA	55.6863	-13.2734	NA	NA	NA	NA	NA	NA	NA	NA	NA	NA	NA	NA	NA	NA	NA	NA	NA	NA	NA	NA	NA	NA	5.86751	NA	NA	NA	NA	14.0766	NA	NA	NA	NA	NA	NA	NA	NA
WDR43_P1P2	33.1798	NA	48.3383	NA	-4.67161	NA	26.4135	NA	NA	NA	NA	20.6696	NA	NA	NA	NA	NA	NA	NA	NA	NA	NA	NA	NA	NA	NA	NA	NA	NA	NA	NA	NA	NA	NA	NA	10.352	NA	NA	NA	NA	NA	NA	NA	NA	NA	NA	NA	NA	NA
RANGAP1_P1P2	16.7046	NA	41.1768	NA	27.7479	NA	24.2776	NA	NA	-12.8671	NA	50.2535	NA	-3.71219	NA	NA	NA	NA	NA	NA	NA	NA	NA	NA	NA	NA	NA	NA	NA	NA	NA	NA	NA	NA	NA	NA	NA	NA	NA	NA	69.0419	NA	NA	NA	NA	NA	NA	NA	NA
MRPL44_P1P2	27.62	-13.3526	37.5878	NA	NA	-25.764	21.6706	12.6115	NA	8.23089	NA	57.1333	NA	-14.6103	NA	NA	NA	NA	NA	NA	NA	NA	NA	NA	NA	NA	NA	NA	NA	NA	NA	NA	NA	NA	NA	NA	NA	NA	NA	NA	NA	NA	NA	NA	NA	NA	NA	-10.0105	NA
CHD6_P1P2	4.02274	NA	11.2981	NA	NA	NA	NA	NA	NA	NA	NA	9.78051	NA	NA	NA	NA	2.42024	NA	NA	NA	NA	NA	NA	NA	NA	NA	NA	NA	NA	NA	NA	NA	NA	NA	NA	NA	NA	NA	NA	NA	NA	NA	NA	NA	NA	NA	-2.3133	NA	NA
LRRC46_P1P2	3.23202	NA	NA	NA	NA	NA	NA	NA	NA	NA	NA	NA	NA	NA	NA	NA	NA	NA	NA	-28.152	-11.7772	-4.47994	-3.39246	NA	NA	NA	NA	-17.6111	-26.4712	-33.6237	-25.8411	-13.8925	-17.7103	NA	NA	NA	NA	NA	NA	NA	NA	NA	NA	NA	NA	NA	NA	NA	NA
CUL1_P1P2	17.5765	NA	17.9426	2.67619	-20.6809	NA	19.0261	25.969	NA	NA	NA	17.8888	NA	NA	NA	NA	NA	NA	NA	NA	NA	NA	NA	NA	NA	NA	NA	NA	NA	NA	NA	NA	NA	6.8669	NA	NA	NA	NA	NA	NA	NA	NA	NA	NA	NA	NA	NA	NA	NA
CCDC84_P1P2	8.97053	NA	29.4185	NA	9.5406	NA	31.9429	NA	NA	NA	NA	46.6138	-4.38078	-7.82618	NA	NA	NA	NA	19.4121	-33.6835	-6.66226	20.8458	5.76684	-4.82953	NA	NA	34.4802	-12.2851	NA	-48.3844	NA	-5.34337	-29.6026	NA	NA	NA	NA	NA	NA	NA	27.5714	NA	NA	NA	NA	NA	NA	NA	NA
RRP7A_P1P2	7.68138	NA	19.9678	NA	NA	NA	9.74515	13.1362	NA	NA	NA	46.9328	NA	NA	NA	NA	NA	NA	NA	NA	NA	NA	NA	NA	NA	NA	NA	NA	NA	NA	NA	NA	NA	NA	NA	5.89404	NA	NA	NA	NA	14.3678	NA	NA	NA	NA	NA	NA	NA	NA
PEX1_P1P2	15.6927	NA	29.2117	NA	5.61857	NA	22.6321	-8.36969	NA	NA	NA	13.9316	NA	-2.0575	NA	NA	NA	NA	NA	NA	NA	NA	NA	NA	NA	NA	NA	NA	NA	NA	NA	NA	NA	NA	NA	NA	NA	NA	NA	NA	NA	NA	-3.5525	NA	NA	NA	-2.96287	NA	NA
PSMD13_P1P2	5.57183	NA	15.3027	31.7477	NA	-4.31953	17.8256	29.5098	NA	NA	NA	19.1443	3.05784	-19.1773	NA	NA	NA	NA	NA	NA	NA	NA	NA	NA	NA	NA	NA	NA	NA	NA	NA	NA	NA	NA	NA	3.62078	NA	NA	NA	NA	39.5793	NA	NA	NA	NA	NA	NA	NA	NA
PRR20E_ENST00000445351.1	0.483696	NA	NA	NA	NA	NA	NA	NA	NA	NA	NA	NA	NA	NA	NA	NA	NA	NA	NA	NA	NA	NA	NA	NA	NA	NA	NA	NA	NA	NA	NA	NA	NA	NA	NA	NA	NA	NA	NA	NA	NA	NA	NA	NA	NA	NA	NA	NA	NA
PGAP2_P1	4.73777	NA	NA	NA	NA	NA	4.20232	NA	NA	NA	NA	9.80595	NA	NA	NA	NA	NA	NA	NA	NA	NA	NA	NA	NA	NA	NA	NA	NA	NA	NA	NA	NA	NA	NA	NA	NA	NA	NA	NA	NA	NA	NA	NA	NA	NA	NA	NA	NA	NA
RPSA_P1P2	24.2732	NA	42.1092	NA	NA	NA	22.4392	25.4885	NA	1.97387	NA	20.3679	NA	NA	NA	NA	NA	NA	NA	NA	NA	NA	NA	NA	NA	NA	NA	NA	NA	NA	NA	NA	NA	88.9652	NA	17.8932	-5.53258	NA	NA	NA	86.5159	NA	NA	NA	NA	NA	NA	NA	NA
TAF1A_P1P2	39.2819	-22.1759	59.2774	NA	-20.717	-33.0222	36.7006	9.50774	NA	2.09088	NA	68.2723	NA	-3.85404	NA	NA	NA	NA	NA	NA	NA	NA	NA	NA	NA	NA	NA	NA	NA	NA	NA	NA	NA	NA	NA	NA	NA	NA	NA	NA	12.0716	NA	NA	NA	NA	NA	NA	NA	NA
MRPL35_P1P2	49.4454	NA	73.2747	5.64422	NA	-39.2102	60.0253	NA	NA	18.1849	NA	76.2441	NA	-8.78921	NA	NA	NA	NA	NA	NA	NA	NA	NA	NA	NA	NA	NA	NA	NA	NA	NA	NA	NA	15.8418	-11.1354	NA	NA	NA	NA	NA	7.01692	NA	NA	NA	NA	NA	-10.1381	-28.6756	NA
TTC1_P1P2	53.6336	NA	50.8282	NA	NA	NA	36.0012	17.3383	NA	NA	NA	72.9202	NA	-5.49764	NA	NA	NA	NA	NA	NA	NA	NA	NA	NA	NA	NA	NA	NA	NA	NA	NA	NA	NA	NA	NA	11.9471	NA	NA	NA	NA	54.6866	NA	NA	NA	NA	NA	NA	-9.74792	NA
TAF6L_P1P2	3.56935	17.7153	4.76222	21.753	-11.8296	26.3296	6.6995	-6.36248	NA	5.85585	NA	NA	NA	NA	NA	-4.93241	NA	NA	NA	NA	NA	NA	NA	NA	NA	NA	NA	NA	NA	NA	NA	NA	NA	NA	NA	NA	NA	NA	NA	NA	-12.681	6.03138	NA	NA	NA	NA	NA	NA	NA
MRPS28_P1P2	34.6464	-4.30514	30.8167	NA	NA	-29.0945	49.1428	NA	NA	1.80528	NA	63.9402	-3.73571	-15.7591	NA	NA	NA	NA	31.77	-60.269	-40.892	-4.33623	-9.29895	-29.3629	-82.7801	-41.1004	34.2678	-35.8903	-55.6919	-53.631	-59.7563	-35.4437	-51.2199	NA	NA	NA	NA	NA	NA	NA	NA	NA	NA	NA	NA	NA	NA	-14.7464	NA
SLC26A8_P1P2	0.685511	NA	NA	NA	NA	NA	NA	NA	NA	NA	NA	NA	NA	NA	NA	NA	NA	NA	NA	NA	NA	NA	NA	NA	NA	NA	NA	NA	NA	NA	NA	NA	NA	NA	NA	NA	NA	NA	NA	NA	NA	NA	3.36489	NA	NA	NA	NA	NA	NA
C19orf44_P1P2	0.724018	NA	NA	NA	NA	NA	NA	NA	NA	NA	NA	NA	NA	NA	NA	NA	NA	NA	NA	NA	NA	NA	NA	NA	NA	NA	NA	NA	NA	NA	NA	NA	NA	NA	NA	NA	NA	NA	NA	NA	NA	NA	NA	NA	NA	NA	NA	NA	NA
EIF3C_P1P2	22.1074	NA	33.5609	NA	25.6317	NA	13.8141	NA	NA	NA	NA	52.5845	NA	-6.6068	NA	NA	NA	NA	NA	NA	NA	NA	NA	NA	NA	NA	NA	NA	NA	NA	NA	NA	NA	NA	NA	NA	NA	NA	NA	NA	NA	NA	NA	NA	NA	NA	NA	NA	NA
ICT1_P1P2	29.3113	-9.4535	48.0259	6.81952	NA	-26.6155	40.2553	NA	NA	15.4171	NA	27.5545	NA	NA	NA	NA	NA	NA	24.2573	-62.291	-39.6116	-25.0501	-14.9226	-28.0513	-70.9817	-40.1629	19.5797	-43.7708	-47.8573	-70.0772	-60.6979	-30.5694	-46.6089	NA	NA	NA	-10.9957	NA	NA	NA	13.8756	NA	NA	NA	NA	NA	-21.1321	-12.141	NA
EIF3L_P1P2	7.22887	NA	13.5585	NA	NA	NA	11.9408	-14.0995	NA	NA	NA	5.88629	5.76986	-16.3177	NA	NA	NA	NA	NA	NA	NA	NA	NA	NA	NA	NA	NA	NA	NA	NA	NA	NA	NA	NA	NA	NA	NA	NA	NA	NA	NA	NA	3.94918	NA	NA	NA	NA	NA	NA
COX10_P1P2	18.2306	NA	54.3521	NA	NA	-26.8394	16.1927	NA	NA	NA	NA	53.3629	NA	-9.20298	NA	NA	5.83674	NA	NA	NA	NA	NA	NA	NA	NA	NA	NA	NA	NA	NA	NA	NA	NA	NA	NA	NA	NA	NA	NA	NA	NA	NA	NA	NA	NA	NA	-2.86353	NA	NA
C11orf68_P1P2	3.92602	NA	NA	NA	NA	NA	NA	NA	NA	NA	NA	NA	NA	NA	NA	NA	NA	NA	NA	NA	NA	NA	NA	NA	NA	NA	NA	NA	NA	NA	NA	NA	NA	NA	NA	NA	NA	NA	NA	NA	NA	NA	NA	NA	NA	NA	NA	NA	NA
MAD2L1BP_P1P2	6.47505	NA	13.7114	NA	31.1076	NA	12.1147	NA	NA	NA	NA	6.2562	NA	-5.25795	NA	NA	NA	NA	7.09993	9.43694	21.4411	58.003	64.4966	NA	2.82194	NA	6.6229	-20.4411	50.4111	-25.8899	14.2641	14.531	12.209	NA	4.69349	5.40726	NA	NA	NA	NA	34.4562	NA	NA	NA	NA	NA	NA	NA	NA
PPCDC_P1	20.8917	NA	32.8069	NA	NA	NA	30.5841	NA	NA	NA	NA	69.7976	NA	-11.1723	NA	NA	NA	NA	NA	NA	NA	NA	NA	NA	NA	NA	NA	NA	NA	NA	NA	NA	NA	NA	NA	NA	NA	NA	NA	NA	13.2793	-6.68432	NA	NA	NA	5.63612	NA	NA	NA
RABGGTA_P1P2	15.8703	NA	20.2489	NA	NA	NA	15.4814	NA	NA	NA	NA	82.1724	-7.17693	NA	NA	NA	NA	NA	NA	NA	NA	NA	NA	NA	NA	NA	NA	NA	NA	NA	NA	NA	NA	NA	NA	NA	NA	NA	NA	NA	22.9572	NA	NA	NA	NA	NA	NA	NA	NA
TCEA1_P1P2	3.95786	NA	NA	NA	NA	NA	NA	NA	NA	NA	NA	NA	NA	NA	NA	NA	NA	NA	NA	NA	NA	NA	NA	NA	NA	NA	NA	NA	NA	NA	NA	NA	NA	NA	NA	NA	NA	NA	NA	NA	NA	NA	NA	NA	NA	NA	NA	NA	4.65702
COX7B_P1P2	5.76028	-8.20962	9.33836	NA	NA	NA	NA	NA	NA	NA	NA	13.5892	NA	NA	NA	NA	NA	NA	NA	NA	NA	NA	NA	NA	NA	NA	NA	NA	NA	NA	NA	NA	NA	NA	NA	NA	NA	NA	NA	NA	NA	NA	NA	NA	NA	-19.3258	NA	NA	NA
RPS21_P1P2	8.08531	NA	13.5763	NA	NA	NA	NA	4.77238	NA	NA	NA	23.9286	NA	-6.84362	NA	NA	NA	NA	NA	NA	NA	NA	NA	NA	NA	NA	NA	NA	NA	NA	NA	NA	NA	NA	NA	8.5664	NA	NA	NA	NA	4.80041	NA	NA	NA	NA	NA	10.8059	NA	NA
CENPL_P1P2	16.3454	-9.91584	23.5195	1.65396	NA	-9.19182	17.0384	NA	NA	NA	NA	12.2753	NA	-14.0302	NA	NA	NA	NA	18.6376	-41.7755	26.8951	NA	12.4995	-8.41186	-51.7269	NA	22.3647	7.02956	76.3617	-38.0229	2.76232	-38.5487	-6.39715	NA	NA	NA	NA	NA	NA	NA	NA	NA	NA	NA	NA	NA	NA	NA	NA
MRPS2_P1P2	44.5625	NA	69.2777	NA	NA	-30.2887	49.4862	NA	NA	8.12238	NA	68.6479	NA	-9.5831	NA	NA	NA	NA	NA	NA	NA	NA	NA	NA	NA	NA	NA	NA	NA	NA	NA	NA	NA	NA	NA	NA	NA	NA	NA	NA	NA	NA	NA	NA	NA	NA	-3.73469	-7.05301	NA
RTF1_P1P2	73.1988	NA	103.291	NA	NA	NA	53.5935	11.3097	7.94104	-15.4015	NA	73.4972	NA	NA	NA	NA	NA	NA	NA	NA	NA	NA	NA	NA	NA	NA	NA	NA	NA	NA	NA	NA	NA	NA	-5.8641	NA	NA	NA	NA	NA	15.9518	NA	NA	NA	NA	NA	NA	NA	NA
MRPL14_P1P2	25.3439	NA	30.255	NA	NA	-8.85949	13.7458	NA	NA	2.51259	NA	53.4109	NA	NA	NA	NA	NA	NA	18.4597	-57.0252	-19.5108	NA	NA	-22.7436	-58.3875	-28.3745	31.7415	-15.153	-45.625	-60.279	-57.7836	-32.4465	-40.7934	NA	-6.64194	NA	-4.44375	NA	NA	NA	NA	NA	1.1421	NA	NA	NA	-27.3836	-7.42958	NA
C1orf43_P1P2	2.96915	NA	NA	NA	NA	NA	NA	NA	NA	NA	NA	NA	NA	NA	NA	NA	NA	NA	NA	NA	NA	NA	NA	NA	NA	NA	NA	NA	NA	NA	NA	NA	NA	NA	NA	NA	NA	NA	NA	NA	NA	NA	1.81122	NA	NA	NA	NA	NA	NA
KAT7_P1P2	4.83018	NA	11.1421	-19.978	NA	-0.504872	7.87959	8.11622	14.888	-12.5298	NA	13.4625	4.84593	NA	NA	8.90547	NA	NA	NA	NA	NA	NA	NA	NA	NA	NA	NA	NA	NA	NA	NA	NA	NA	NA	NA	NA	NA	NA	NA	NA	NA	14.4432	-12.9151	NA	NA	NA	NA	NA	-14.6585
ADNP_P1P2	3.80108	NA	6.74456	0.117437	-1.34982	NA	NA	NA	NA	NA	NA	11.6551	NA	-2.87699	4.53896	NA	NA	NA	NA	NA	NA	NA	NA	NA	NA	NA	NA	NA	NA	NA	NA	NA	NA	NA	NA	NA	NA	NA	NA	NA	NA	-8.14314	NA	NA	NA	NA	NA	NA	NA
KIF18A_P1P2	4.91948	-1.75516	20.7962	NA	35.6425	NA	5.3145	19.7406	NA	NA	NA	7.16844	NA	-5.4232	NA	NA	NA	NA	NA	NA	NA	NA	NA	NA	NA	NA	NA	NA	NA	NA	NA	NA	NA	14.8251	10.8817	5.01194	NA	NA	NA	NA	31.9684	11.286	NA	NA	NA	NA	NA	NA	NA
SEPHS2_P1P2	3.73739	16.5052	15.5397	15.0114	-7.01388	NA	10.1024	11.9733	NA	NA	NA	31.9875	NA	-9.33512	7.84685	NA	3.34428	NA	NA	NA	NA	NA	NA	NA	NA	NA	NA	NA	NA	NA	NA	NA	NA	NA	NA	NA	NA	NA	NA	NA	8.49889	NA	NA	NA	NA	NA	NA	NA	NA
NUMA1_ENST00000393695.3	7.27535	NA	8.64693	NA	NA	NA	NA	NA	NA	NA	NA	NA	NA	NA	NA	NA	NA	NA	NA	NA	NA	NA	NA	NA	NA	NA	NA	NA	NA	NA	NA	NA	NA	NA	NA	NA	NA	NA	NA	NA	NA	NA	NA	NA	NA	NA	NA	NA	NA
SEMA4D_P1	2.16903	NA	NA	NA	NA	NA	NA	NA	NA	NA	NA	NA	NA	NA	NA	NA	NA	NA	NA	NA	NA	NA	NA	NA	NA	NA	NA	NA	NA	NA	NA	NA	NA	NA	NA	NA	NA	2.45946	NA	NA	NA	NA	NA	NA	NA	NA	NA	NA	NA
S100A3_P1P2	2.04382	NA	NA	NA	NA	NA	NA	NA	NA	NA	NA	NA	NA	NA	NA	NA	NA	NA	NA	NA	NA	NA	NA	NA	NA	NA	NA	NA	NA	NA	NA	NA	NA	NA	NA	NA	NA	NA	NA	NA	NA	NA	NA	NA	NA	NA	NA	NA	NA
PHB_P1P2	59.1535	NA	61.8501	5.80819	38.3683	NA	33.9485	13.209	17.7354	NA	NA	65.8357	NA	NA	NA	NA	NA	NA	NA	NA	NA	NA	NA	NA	NA	NA	NA	NA	NA	NA	NA	NA	NA	63.4118	-28.4786	8.81483	-13.0883	NA	NA	NA	67.6026	NA	NA	NA	NA	NA	NA	NA	NA
ZNF236_P1P2	20.6016	NA	21.7736	NA	-3.91495	NA	9.67123	7.5664	NA	NA	NA	29.6384	-16.08	-16.5624	NA	NA	NA	NA	NA	NA	NA	NA	NA	NA	NA	NA	NA	NA	NA	NA	NA	NA	NA	NA	NA	NA	NA	NA	NA	NA	NA	NA	NA	NA	NA	NA	NA	NA	NA
POLR2K_P1P2	24.4576	NA	35.2335	NA	NA	NA	12.8282	NA	NA	NA	NA	37.3624	NA	NA	NA	NA	NA	NA	NA	NA	NA	NA	NA	NA	NA	NA	NA	NA	NA	NA	NA	NA	NA	NA	NA	NA	NA	NA	NA	NA	NA	NA	NA	NA	NA	NA	NA	NA	NA
ANAPC10_P1P2	30.743	-2.5903	30.0702	NA	NA	NA	16.1165	7.11842	NA	NA	NA	86.1245	NA	-15.0709	NA	NA	NA	NA	NA	NA	NA	NA	NA	NA	NA	NA	NA	NA	NA	NA	NA	NA	NA	NA	NA	4.90956	-2.93451	NA	NA	NA	43.1006	NA	NA	NA	NA	NA	NA	NA	NA
OLIG2_P1P2	0.958053	NA	NA	NA	NA	NA	NA	NA	NA	NA	NA	NA	NA	NA	NA	NA	NA	NA	NA	NA	NA	NA	NA	NA	NA	NA	NA	NA	NA	NA	NA	NA	NA	NA	NA	NA	NA	NA	NA	NA	NA	NA	NA	NA	NA	NA	NA	NA	NA
SLC39A9_P1P2	17.0346	NA	56.0151	NA	NA	NA	33.372	NA	NA	NA	NA	40.2762	NA	-9.0363	18.2587	NA	NA	NA	NA	NA	NA	NA	NA	NA	NA	NA	NA	NA	NA	NA	NA	NA	NA	NA	NA	NA	NA	NA	NA	NA	NA	NA	NA	NA	NA	NA	NA	NA	NA
COA3_P1P2	4.78105	-5.94982	12.5595	NA	NA	-6.53628	5.7278	NA	NA	NA	NA	15.0029	NA	NA	6.95297	NA	NA	NA	9.94977	-44.5656	-36.8983	-6.02508	-8.21419	-16.0067	-51.2584	-35.7766	19.0911	-24.3291	-46.0649	-46.2429	-41.8883	-20.7539	-30.746	5.17523	NA	NA	NA	NA	NA	NA	6.87342	NA	NA	NA	NA	NA	NA	-21.0151	NA
ACTR5_P1P2	16.026	NA	30.2146	23.7971	-16.6773	NA	24.0834	NA	6.86156	1.59451	NA	19.6115	-6.48128	-9.05784	NA	NA	NA	NA	NA	NA	NA	NA	NA	NA	NA	NA	NA	NA	NA	NA	NA	NA	NA	NA	NA	NA	NA	NA	NA	NA	13.4048	NA	NA	NA	NA	NA	2.96264	NA	NA
WWOX_P1P2	2.86541	NA	NA	NA	NA	NA	NA	NA	NA	NA	NA	NA	NA	NA	1.78196	NA	NA	NA	NA	NA	NA	NA	NA	NA	NA	NA	NA	NA	NA	NA	NA	NA	NA	NA	NA	NA	NA	NA	NA	NA	NA	NA	NA	NA	NA	NA	NA	NA	NA
PRPF31_P1P2	26.8499	NA	85.1291	30.2852	11.0856	NA	35.8609	NA	NA	NA	NA	76.6502	NA	NA	NA	NA	NA	NA	NA	NA	NA	NA	NA	NA	NA	NA	NA	NA	NA	NA	NA	NA	NA	NA	NA	15.8531	NA	NA	NA	NA	45.3669	NA	NA	NA	NA	NA	NA	NA	NA
ZNF41_P1P2	7.02442	NA	NA	NA	NA	NA	NA	NA	NA	NA	NA	NA	NA	NA	NA	NA	NA	NA	NA	NA	NA	NA	NA	NA	NA	NA	NA	NA	NA	NA	NA	NA	NA	NA	NA	NA	NA	NA	NA	NA	NA	NA	NA	NA	NA	NA	NA	NA	NA
RPS5_P1P2	52.0012	NA	95.0056	NA	-9.28722	NA	59.4617	NA	NA	NA	NA	29.858	NA	-6.48155	NA	NA	NA	NA	36.6482	-27.3539	-17.6531	NA	NA	-17.0621	-30.0453	-32.5142	43.1398	NA	-30.9573	-45.2007	-16.8043	-10.3105	-25.7604	NA	NA	12.3241	NA	NA	NA	NA	35.8706	NA	NA	NA	NA	NA	NA	NA	NA
GPN1_P1P2	23.8862	NA	53.9013	NA	NA	NA	30.0303	NA	NA	NA	NA	41.8494	-6.12693	-6.89411	NA	NA	NA	NA	NA	NA	NA	NA	NA	NA	NA	NA	NA	NA	NA	NA	NA	NA	NA	NA	NA	NA	NA	NA	NA	NA	NA	NA	NA	NA	NA	NA	NA	NA	NA
ISG20L2_P1P2	11.1733	NA	18.5747	NA	-30.1411	NA	22.5227	NA	NA	NA	NA	NA	NA	NA	NA	NA	NA	NA	NA	NA	NA	NA	NA	NA	NA	NA	NA	NA	NA	NA	NA	NA	NA	NA	NA	NA	NA	NA	NA	NA	10.3924	NA	NA	NA	NA	NA	NA	NA	NA
TBCA_P1P2	7.59873	NA	8.82505	NA	NA	NA	6.23452	5.20576	NA	NA	NA	NA	NA	NA	NA	NA	5.12939	NA	NA	NA	NA	NA	NA	NA	NA	NA	NA	NA	NA	NA	NA	NA	NA	NA	NA	NA	NA	NA	NA	NA	NA	NA	NA	NA	NA	NA	NA	NA	NA
LAMTOR4_P1P2	3.14262	NA	12.2565	NA	NA	-14.4943	4.38647	NA	NA	NA	NA	6.747	NA	NA	NA	NA	NA	NA	7.4936	-47.07	-34.476	-44.044	-30.937	-25.5541	-54.4745	-16.3976	8.63354	-38.1902	-45.3428	-47.6025	-26.6347	-32.9824	-45.9158	NA	NA	NA	-3.25633	NA	NA	NA	NA	NA	NA	NA	NA	NA	NA	NA	NA
GTF2A2_P1P2	4.51321	NA	8.79874	3.75609	NA	13.0168	10.8516	NA	NA	NA	NA	16.6214	NA	-24.4582	NA	NA	NA	NA	15.6119	-46.0179	-52.4162	NA	-15.9729	-12.4638	-29.4576	NA	15.9372	-24.3044	-71.5358	-73.2861	-43.4741	-15.1049	-52.8513	NA	NA	NA	NA	NA	NA	NA	-7.16183	NA	NA	NA	NA	NA	NA	NA	NA
SLC25A46_P1P2	5.55823	-7.03762	12.2106	5.76786	NA	-12.7791	16.148	NA	NA	NA	NA	5.40355	NA	NA	24.8973	-10.9067	19.5053	NA	NA	NA	NA	NA	NA	NA	NA	NA	NA	NA	NA	NA	NA	NA	NA	NA	-1.55759	NA	NA	NA	NA	NA	NA	NA	NA	NA	NA	NA	-7.75723	-5.64282	NA
NCBP1_P1P2	25.112	NA	34.7852	NA	NA	NA	20.7401	4.55381	NA	10.1572	NA	21.212	NA	-6.88505	NA	NA	NA	NA	NA	NA	NA	NA	NA	NA	NA	NA	NA	NA	NA	NA	NA	NA	NA	NA	NA	NA	NA	NA	NA	NA	NA	NA	NA	NA	NA	NA	NA	NA	NA
KCNC1_P2	4.06606	NA	NA	NA	NA	NA	NA	NA	NA	NA	NA	NA	NA	NA	NA	NA	NA	NA	NA	NA	NA	NA	NA	NA	NA	NA	NA	NA	NA	NA	NA	NA	NA	NA	NA	NA	NA	NA	NA	NA	NA	NA	1.94585	NA	NA	NA	NA	NA	NA
EXOSC5_P1P2	44.2851	NA	58.4082	6.38966	-7.62217	-4.29435	38.8202	5.87318	2.26478	-23.6011	NA	65.3152	-4.00012	-4.35313	NA	NA	NA	NA	NA	NA	NA	NA	NA	NA	NA	NA	NA	NA	NA	NA	NA	NA	NA	NA	NA	15.1698	-11.0425	NA	NA	NA	93.3799	NA	NA	NA	NA	NA	NA	NA	NA
DNAJC21_P1P2	4.18365	NA	9.40388	NA	NA	NA	6.2504	NA	NA	-6.05881	NA	12.2115	NA	NA	NA	NA	NA	NA	NA	NA	NA	NA	NA	NA	NA	NA	NA	NA	NA	NA	NA	NA	NA	NA	NA	NA	NA	NA	NA	NA	NA	NA	NA	NA	NA	NA	NA	NA	NA
MRPL51_P1P2	53.1553	-11.3188	65.1924	NA	-2.99072	-15.5376	52.1468	NA	NA	6.25161	NA	75.8631	-3.6431	-8.86576	NA	NA	NA	NA	NA	NA	NA	NA	NA	NA	NA	NA	NA	NA	NA	NA	NA	NA	NA	NA	NA	NA	NA	NA	NA	NA	NA	NA	NA	NA	NA	NA	-8.00259	-46.8528	NA
IMMT_P1P2	30.7678	NA	69.603	NA	-3.58464	NA	46.0307	NA	NA	NA	NA	71.1172	NA	-10.7929	NA	12.2746	NA	NA	38.0938	-31.1378	-6.53378	NA	NA	-11.9505	-31.7486	-23.5861	40.0822	-10.5674	NA	NA	-24.2946	NA	-16.6686	NA	NA	NA	NA	NA	NA	NA	NA	NA	NA	NA	NA	NA	-3.74282	NA	NA
KIAA0020_P1	7.17873	NA	19.3794	NA	-34.8473	-10.9998	25.6971	NA	NA	1.90136	NA	11.0036	NA	NA	NA	NA	NA	NA	NA	NA	NA	NA	NA	NA	NA	NA	NA	NA	NA	NA	NA	NA	NA	NA	NA	NA	NA	NA	NA	NA	7.00391	NA	NA	NA	NA	NA	-4.61034	NA	NA
OGDH_P1P2	9.95648	NA	41.0097	NA	NA	NA	36.1362	NA	NA	-12.0708	NA	92.9641	-9.68453	-10.7817	24.4056	NA	11.9164	NA	NA	NA	NA	NA	NA	NA	NA	NA	NA	NA	NA	NA	NA	NA	NA	16.8286	NA	NA	NA	NA	NA	NA	NA	NA	NA	NA	NA	NA	NA	NA	NA
PCDHGB1_P1P2	-0.34623	NA	NA	NA	NA	NA	NA	NA	NA	NA	NA	NA	NA	NA	NA	NA	NA	NA	NA	NA	NA	NA	NA	NA	NA	NA	NA	NA	NA	NA	NA	NA	NA	NA	NA	NA	NA	NA	NA	NA	NA	NA	NA	NA	NA	NA	NA	NA	NA
NDUFA1_P1P2	17.1569	NA	38.6577	NA	NA	NA	29.731	NA	NA	NA	NA	25.3188	NA	-6.77626	NA	NA	NA	NA	NA	NA	NA	NA	NA	NA	NA	NA	NA	NA	NA	NA	NA	NA	NA	NA	NA	NA	NA	NA	NA	NA	NA	NA	NA	NA	NA	NA	NA	-5.87893	NA
SLMAP_P1P2	2.19229	NA	1.47467	NA	NA	15.4699	4.18789	NA	NA	NA	NA	NA	NA	NA	NA	NA	NA	NA	NA	NA	NA	NA	NA	NA	NA	NA	NA	NA	NA	NA	NA	NA	NA	NA	NA	NA	NA	NA	NA	NA	NA	NA	NA	NA	NA	NA	NA	-6.18536	NA
RNF40_P1P2	6.02787	-2.87184	6.83011	-25.0855	NA	NA	10.5633	NA	NA	NA	NA	NA	NA	NA	NA	NA	NA	NA	NA	NA	NA	NA	NA	NA	NA	NA	NA	NA	NA	NA	NA	NA	NA	NA	NA	1.61403	NA	NA	NA	NA	19.9864	NA	NA	NA	NA	NA	13.5818	8.38619	NA
CDC26_P1P2	49.0428	NA	76.4058	NA	10.6182	-4.26224	47.5715	37.7429	NA	NA	NA	72.2832	NA	-33.4261	NA	NA	NA	NA	NA	NA	NA	NA	NA	NA	NA	NA	NA	NA	NA	NA	NA	NA	NA	NA	NA	NA	NA	NA	NA	NA	10.6885	NA	NA	NA	NA	NA	NA	NA	NA
UBR4_P1P2	4.99611	NA	27.721	28.3069	9.67702	-15.2064	12.1295	51.8843	NA	NA	NA	15.7356	NA	NA	NA	NA	NA	NA	NA	NA	NA	NA	NA	NA	NA	NA	NA	NA	NA	NA	NA	NA	NA	7.22518	NA	NA	NA	NA	NA	NA	27.5067	NA	-6.62837	NA	NA	NA	3.39539	NA	NA
LIAS_P1P2	22.0738	-5.65232	31.0171	NA	-29.5901	NA	18.547	NA	NA	NA	NA	51.3738	NA	-25.7087	NA	NA	NA	NA	NA	NA	NA	NA	NA	NA	NA	NA	NA	NA	NA	NA	NA	NA	NA	NA	NA	NA	NA	NA	NA	NA	NA	NA	NA	NA	NA	NA	NA	NA	NA
LIG3_P1P2	7.24691	NA	NA	NA	NA	NA	NA	NA	NA	NA	NA	19.9798	-10.8793	NA	NA	NA	NA	NA	NA	NA	NA	NA	NA	NA	NA	NA	NA	NA	NA	NA	NA	NA	NA	NA	NA	NA	NA	NA	NA	NA	NA	NA	NA	NA	NA	NA	NA	NA	NA
DCPS_P1P2	24.1377	NA	20.9915	NA	NA	-14.9792	23.2115	NA	NA	NA	NA	47.7907	NA	NA	4.00211	NA	6.11314	NA	NA	NA	NA	NA	NA	NA	NA	NA	NA	NA	NA	NA	NA	NA	NA	NA	NA	NA	NA	NA	NA	NA	4.83346	NA	NA	NA	NA	11.523	NA	-3.21868	NA
MRPL38_P1P2	7.15072	NA	19.9407	4.63153	NA	-9.98343	11.2213	4.87567	NA	NA	NA	39.9768	NA	-3.28271	NA	NA	NA	NA	NA	NA	NA	NA	NA	NA	NA	NA	NA	NA	NA	NA	NA	NA	NA	NA	NA	NA	NA	NA	NA	NA	NA	NA	NA	NA	NA	NA	NA	-2.37317	NA
SNRNP35_P1P2	31.6137	NA	58.6825	NA	31.8947	7.05501	33.8931	4.92529	NA	NA	NA	55.1049	NA	NA	NA	NA	NA	NA	NA	NA	NA	NA	NA	NA	NA	NA	NA	NA	NA	NA	NA	NA	NA	29.981	NA	4.32126	NA	NA	NA	NA	20.8751	NA	NA	NA	NA	NA	NA	NA	NA
FAM126B_P1P2	4.13235	NA	NA	NA	NA	NA	NA	NA	NA	NA	NA	NA	NA	NA	NA	NA	NA	NA	NA	NA	NA	NA	NA	NA	NA	NA	NA	NA	NA	NA	NA	NA	NA	NA	NA	NA	NA	NA	NA	NA	NA	NA	NA	NA	NA	NA	NA	NA	NA
AKR1C4_P1P2	1.69373	NA	NA	NA	NA	NA	NA	NA	NA	NA	NA	NA	NA	NA	NA	NA	NA	NA	NA	NA	NA	NA	NA	NA	NA	NA	NA	NA	NA	NA	NA	NA	NA	NA	NA	NA	NA	NA	NA	NA	NA	NA	NA	NA	NA	NA	NA	NA	NA
MRPL42_P1P2	32.3788	NA	52.0513	NA	NA	-22.557	39.1524	NA	3.49002	16.9696	NA	80.5022	-3.82217	-9.01826	NA	NA	NA	NA	48.9308	-70.6071	-65.4588	NA	-6.47793	-32.2654	-89.6775	-66.7195	52.3505	-36.1726	-91.0713	-65.6846	-67.1552	-47.5495	-64.1743	17.6374	NA	NA	-3.96225	NA	NA	NA	21.2464	NA	9.2581	NA	NA	NA	-8.10409	-13.5101	NA
PIK3R2_P1	4.2234	NA	NA	NA	NA	NA	3.62516	NA	NA	NA	NA	NA	NA	NA	NA	NA	NA	NA	NA	NA	NA	NA	NA	NA	NA	NA	NA	NA	NA	NA	NA	NA	NA	NA	NA	NA	NA	NA	NA	NA	NA	NA	NA	NA	NA	NA	NA	NA	NA
SHKBP1_P1P2	3.4587	NA	NA	NA	NA	NA	NA	NA	NA	NA	NA	NA	NA	NA	NA	NA	6.37352	NA	NA	NA	NA	NA	NA	NA	NA	NA	NA	NA	NA	NA	NA	NA	NA	NA	NA	NA	NA	NA	NA	NA	NA	NA	NA	NA	NA	NA	NA	NA	NA
UTP20_P1P2	19.7941	NA	64.6559	NA	NA	NA	24.8146	16.5681	3.82529	3.00644	NA	70.5608	NA	NA	NA	NA	NA	NA	NA	NA	NA	NA	NA	NA	NA	NA	NA	NA	NA	NA	NA	NA	NA	9.59389	NA	13.7394	-13.4105	NA	NA	NA	67.3863	NA	NA	NA	NA	NA	NA	NA	NA
C15orf41_P1P2	39.9421	-14.0984	44.065	NA	-10.2957	-9.91175	76.476	NA	NA	NA	NA	61.1344	-10.1022	6.63004	24.469	NA	12.6449	NA	NA	NA	NA	NA	NA	NA	NA	NA	NA	NA	NA	NA	NA	NA	NA	NA	NA	NA	NA	NA	NA	NA	NA	NA	NA	NA	NA	NA	NA	NA	NA
SPINK4_P1P2	2.57798	-3.81706	NA	NA	NA	NA	NA	NA	NA	NA	NA	NA	NA	NA	NA	NA	NA	NA	NA	NA	NA	NA	NA	NA	NA	NA	NA	NA	NA	NA	NA	NA	NA	NA	NA	NA	NA	NA	NA	NA	NA	NA	NA	NA	NA	NA	NA	NA	NA
TASP1_P1P2	3.97387	NA	NA	NA	NA	NA	2.90887	NA	NA	NA	NA	NA	NA	NA	NA	NA	NA	NA	4.11645	-23.3828	-23.5397	-19.0076	NA	-7.92253	NA	NA	9.31928	-24.1056	-34.476	-42.7712	-20.428	-7.70891	-26.6663	NA	NA	NA	NA	NA	NA	NA	NA	NA	NA	NA	NA	NA	NA	NA	NA
ANKRD49_P1P2	6.00956	NA	5.5611	NA	NA	NA	5.83545	NA	NA	NA	NA	NA	NA	NA	NA	NA	NA	NA	NA	NA	NA	NA	NA	NA	NA	NA	NA	NA	NA	NA	NA	NA	NA	NA	NA	NA	NA	NA	NA	NA	NA	NA	NA	NA	NA	NA	NA	NA	NA
SMYD4_P1P2	8.20341	NA	19.6474	NA	NA	NA	6.81307	8.20577	NA	NA	NA	47.6851	NA	6.81749	NA	NA	NA	NA	NA	NA	NA	NA	NA	NA	NA	NA	NA	NA	NA	NA	NA	NA	NA	NA	NA	NA	NA	NA	NA	NA	NA	NA	NA	NA	NA	NA	NA	NA	NA
PSMB5_P1P2	49.0797	NA	62.5283	21.7014	70.0351	NA	32.3824	16.1588	NA	NA	NA	70.4411	NA	-23.3816	NA	NA	NA	NA	NA	NA	NA	NA	NA	NA	NA	NA	NA	NA	NA	NA	NA	NA	NA	NA	NA	9.21232	NA	NA	NA	NA	47.2001	NA	NA	NA	NA	NA	NA	NA	NA
HAUS4_P1P2	40.5333	NA	82.2027	NA	48.1701	NA	69.1404	14.9257	NA	NA	NA	103.849	NA	-8.66732	NA	NA	NA	NA	NA	NA	NA	NA	NA	NA	NA	NA	NA	NA	NA	NA	NA	NA	NA	8.03543	NA	7.92524	NA	NA	NA	NA	73.8429	NA	NA	NA	NA	NA	NA	NA	NA
PARP1_P1P2	11.3228	NA	10.2342	NA	NA	NA	10.5213	NA	NA	NA	NA	8.38082	NA	NA	NA	NA	4.50888	NA	NA	NA	NA	NA	NA	NA	NA	NA	NA	NA	NA	NA	NA	NA	NA	NA	NA	NA	NA	NA	NA	NA	NA	NA	NA	NA	NA	NA	NA	NA	NA
TAF1C_P1P2	32.162	-8.14062	39.0859	NA	-14.6661	-13.2325	22.7324	NA	NA	7.24028	NA	49.0167	-6.54089	NA	NA	NA	NA	NA	NA	NA	NA	NA	NA	NA	NA	NA	NA	NA	NA	NA	NA	NA	NA	NA	NA	9.09462	-3.56455	NA	NA	NA	14.081	NA	NA	NA	NA	NA	NA	NA	NA
RBBP8_P1P2	27.0915	NA	48.017	NA	-4.09962	NA	46.1637	NA	NA	NA	NA	54.774	NA	NA	23.4979	NA	12.5541	NA	38.8747	-39.653	-59.8736	NA	NA	-18.1635	-39.9189	-13.2101	36.4848	-53.0608	-71.3329	-33.1667	-49.058	-40.2098	-24.7515	NA	NA	NA	NA	NA	NA	NA	NA	NA	NA	NA	NA	NA	NA	NA	NA
ROMO1_P1P2	8.92139	NA	24.8942	11.6926	NA	-13.6659	37.0632	NA	NA	NA	NA	24.8	-23.1322	NA	NA	NA	NA	NA	NA	NA	NA	NA	NA	NA	NA	NA	NA	NA	NA	NA	NA	NA	NA	NA	NA	NA	NA	NA	NA	NA	NA	NA	NA	NA	NA	NA	-6.68233	-19.1117	NA
DNM1L_P1P2	20.9574	-6.02962	28.2917	14.0852	23.6556	-14.3494	30.8314	NA	2.14142	NA	NA	15.6807	NA	NA	47.9576	-16.8858	5.51062	NA	NA	NA	NA	NA	NA	NA	NA	NA	NA	NA	NA	NA	NA	NA	NA	NA	NA	NA	NA	NA	NA	NA	NA	NA	NA	NA	NA	NA	NA	-17.337	NA
SERF2_P1	7.09268	NA	NA	-26.3141	-5.46	NA	NA	NA	NA	NA	NA	25.6616	-9.56665	NA	NA	-5.16175	NA	NA	NA	NA	NA	NA	NA	NA	NA	NA	NA	NA	NA	NA	NA	NA	NA	NA	NA	NA	NA	NA	NA	NA	NA	NA	NA	NA	NA	NA	NA	NA	NA
NAA38_P1P2	54.2469	NA	108.16	NA	22.8734	NA	70.5547	21.0904	NA	NA	NA	101.304	NA	NA	NA	NA	NA	NA	48.6386	-7.17161	NA	29.8479	6.86627	1.88082	NA	-19.6785	47.9743	NA	NA	-29.2735	5.49709	-5.90172	-7.2466	NA	NA	NA	NA	NA	NA	NA	47.7649	NA	NA	NA	NA	NA	NA	NA	NA
GET4_P1P2	3.50001	NA	NA	NA	NA	NA	3.87681	NA	NA	NA	NA	NA	NA	NA	NA	NA	NA	NA	NA	NA	NA	NA	NA	NA	NA	NA	NA	NA	NA	NA	NA	NA	NA	NA	NA	NA	NA	NA	NA	NA	NA	NA	NA	NA	NA	NA	NA	NA	NA
RPL35_P1P2	7.97885	NA	21.6872	NA	-32.1994	NA	25.7412	NA	NA	NA	NA	23.8216	NA	NA	NA	NA	NA	NA	NA	NA	NA	NA	NA	NA	NA	NA	NA	NA	NA	NA	NA	NA	NA	NA	NA	NA	NA	NA	NA	NA	NA	NA	NA	NA	NA	NA	NA	NA	NA
FAM118B_P1P2	6.1768	-4.04602	NA	NA	NA	NA	NA	NA	NA	NA	NA	11.351	-2.58187	NA	NA	NA	NA	NA	NA	NA	NA	NA	NA	NA	NA	NA	NA	NA	NA	NA	NA	NA	NA	NA	-1.93781	NA	NA	NA	NA	NA	NA	NA	NA	NA	NA	NA	NA	NA	NA
RPAP2_P1P2	71.0874	NA	121.82	NA	NA	NA	89.8654	NA	24.7916	NA	NA	123.578	NA	-21.7418	NA	NA	NA	NA	NA	NA	NA	NA	NA	NA	NA	NA	NA	NA	NA	NA	NA	NA	NA	63.8367	-17.4629	9.13274	-5.71098	NA	NA	NA	29.0231	NA	4.29404	NA	NA	NA	NA	NA	NA
RPS23_P1P2	39.4847	NA	74.7266	NA	NA	NA	35.6744	12.7992	NA	NA	NA	19.5045	NA	NA	NA	NA	NA	NA	NA	NA	NA	NA	NA	NA	NA	NA	NA	NA	NA	NA	NA	NA	NA	11.209	NA	19.3577	-9.57621	NA	NA	NA	16.3383	NA	NA	NA	NA	NA	6.27164	NA	NA
SPAG16_P1P2	8.5035	NA	NA	NA	NA	NA	NA	NA	NA	NA	NA	NA	NA	NA	NA	NA	NA	NA	NA	NA	NA	NA	NA	NA	NA	NA	NA	NA	NA	NA	NA	NA	NA	NA	NA	NA	NA	NA	NA	NA	NA	NA	NA	NA	NA	NA	NA	NA	NA
ALAD_P1P2	10.6011	NA	NA	NA	NA	NA	11.0537	NA	NA	NA	NA	17.5052	-11.7815	NA	8.29684	NA	9.29728	NA	17.7318	-41.1015	-49.2527	-22.4873	-9.26425	-18.3631	-54.4045	-27.0443	14.2962	-41.8108	-64.2256	-50.2817	-40.922	-24.8128	-33.1948	NA	-1.5513	NA	NA	NA	NA	NA	NA	NA	NA	NA	NA	NA	NA	NA	-10.0111
EMC7_P1P2	2.57148	NA	NA	NA	-1.98644	NA	NA	NA	NA	NA	NA	NA	NA	NA	NA	NA	NA	NA	NA	NA	NA	NA	NA	NA	NA	NA	NA	NA	NA	NA	NA	NA	NA	NA	NA	NA	NA	NA	NA	NA	NA	-3.76358	NA	NA	NA	NA	NA	15.8505	NA
DMTF1_P1P2	3.26323	NA	NA	NA	6.7149	NA	NA	NA	NA	NA	NA	NA	NA	NA	NA	NA	NA	NA	NA	NA	NA	NA	NA	NA	NA	NA	NA	NA	NA	NA	NA	NA	NA	NA	NA	NA	NA	NA	NA	NA	NA	NA	NA	NA	NA	NA	NA	NA	NA
SH3YL1_P1P2	3.09131	NA	NA	NA	NA	NA	NA	NA	NA	NA	NA	NA	NA	NA	NA	NA	NA	NA	NA	NA	NA	NA	NA	NA	NA	NA	NA	NA	NA	NA	NA	NA	NA	NA	NA	NA	NA	NA	NA	NA	NA	NA	NA	NA	NA	NA	NA	NA	NA
CHMP6_P1P2	47.7343	NA	65.5283	5.44371	43.611	NA	39.189	NA	NA	NA	NA	81.4396	NA	-4.62695	NA	NA	NA	NA	NA	NA	NA	NA	NA	NA	NA	NA	NA	NA	NA	NA	NA	NA	NA	NA	NA	26.8315	NA	NA	NA	NA	52.6395	-7.42176	NA	NA	NA	NA	NA	-6.78588	NA
SLC11A2_P1	3.82187	NA	2.7112	NA	6.03885	NA	3.93797	NA	NA	NA	NA	NA	NA	NA	3.99906	NA	NA	NA	NA	NA	NA	NA	NA	NA	NA	NA	NA	NA	NA	NA	NA	NA	NA	NA	NA	NA	NA	NA	NA	NA	NA	NA	NA	NA	NA	NA	NA	NA	NA
PKMYT1_P1P2	8.23208	NA	19.6235	NA	NA	NA	11.8765	4.00216	NA	NA	NA	17.0279	NA	-12.0264	NA	NA	NA	NA	NA	NA	NA	NA	NA	NA	NA	NA	NA	NA	NA	NA	NA	NA	NA	NA	NA	NA	NA	NA	NA	NA	29.6504	NA	NA	NA	NA	NA	NA	NA	NA
RPL21_P1P2	26.6263	NA	66.7373	NA	-21.2636	NA	27.2257	8.44062	NA	NA	NA	30.0228	NA	NA	NA	NA	NA	NA	NA	NA	NA	NA	NA	NA	NA	NA	NA	NA	NA	NA	NA	NA	NA	39.1364	NA	13.0085	NA	NA	NA	NA	52.3997	NA	NA	NA	NA	NA	NA	NA	NA
SPICE1_P1P2	9.09551	NA	15.9015	NA	NA	NA	7.50428	NA	NA	NA	NA	14.5268	NA	-4.2302	15.7676	NA	7.71607	NA	NA	NA	NA	NA	NA	NA	NA	NA	NA	NA	NA	NA	NA	NA	NA	NA	NA	NA	NA	NA	NA	NA	NA	NA	NA	NA	NA	NA	NA	NA	NA
POP7_P1P2	7.338	NA	NA	NA	NA	NA	NA	NA	NA	NA	NA	NA	NA	NA	NA	NA	NA	NA	NA	NA	NA	NA	NA	NA	NA	NA	NA	NA	NA	NA	NA	NA	NA	NA	NA	NA	NA	NA	NA	NA	NA	NA	NA	NA	NA	NA	NA	NA	NA
SDE2_P1P2	8.5435	-7.39202	7.36465	NA	NA	-11.7804	NA	NA	NA	NA	NA	18.141	-14.8333	-6.28259	NA	NA	NA	NA	NA	NA	NA	NA	NA	NA	NA	NA	NA	NA	NA	NA	NA	NA	NA	NA	NA	NA	NA	NA	NA	NA	NA	NA	NA	NA	NA	NA	NA	NA	NA
ZIC1_P1P2	1.90341	NA	NA	NA	NA	NA	NA	NA	NA	NA	NA	NA	NA	NA	NA	NA	NA	NA	NA	NA	NA	NA	NA	NA	NA	NA	NA	NA	NA	NA	NA	NA	NA	NA	NA	NA	NA	NA	NA	NA	NA	NA	NA	NA	NA	NA	NA	NA	NA
DMRTC2_P1P2	6.98092	NA	NA	NA	NA	NA	NA	NA	NA	NA	NA	47.5685	NA	-12.4933	NA	NA	NA	NA	NA	NA	NA	NA	NA	NA	NA	NA	NA	NA	NA	NA	NA	NA	NA	NA	NA	NA	NA	NA	NA	NA	NA	NA	NA	NA	NA	NA	NA	NA	NA
TAF12_P1P2	11.8911	NA	23.2151	5.45369	-11.0441	NA	25.8779	NA	NA	17.6777	NA	NA	NA	NA	NA	NA	NA	NA	NA	NA	NA	NA	NA	NA	NA	NA	NA	NA	NA	NA	NA	NA	NA	NA	NA	6.79307	NA	NA	NA	NA	NA	NA	-2.55319	NA	NA	NA	NA	NA	NA
TELO2_P1P2	13.2788	-7.21994	22.8298	NA	-1.46423	-20.4723	15.3084	NA	NA	NA	NA	20.631	-13.0664	-28.6393	NA	3.31968	3.9522	NA	NA	NA	NA	NA	NA	NA	NA	NA	NA	NA	NA	NA	NA	NA	NA	NA	NA	NA	NA	NA	NA	NA	4.81396	NA	NA	NA	NA	NA	NA	NA	NA
STX18_P1P2	13.448	4.71462	24.5461	NA	NA	NA	26.8485	NA	NA	NA	NA	54.0859	NA	-10.0281	NA	NA	NA	NA	NA	NA	NA	NA	NA	NA	NA	NA	NA	NA	NA	NA	NA	NA	NA	NA	NA	NA	NA	NA	NA	NA	NA	NA	NA	NA	NA	NA	NA	NA	NA
RPS9_P1P2	17.5373	NA	28.5768	NA	NA	NA	8.103	18.9021	NA	NA	NA	19.1748	NA	-0.682739	NA	NA	NA	NA	NA	NA	NA	NA	NA	NA	NA	NA	NA	NA	NA	NA	NA	NA	NA	NA	NA	12.9897	-3.4366	NA	NA	NA	NA	NA	NA	NA	NA	NA	NA	NA	NA
RANBP3_P1P2	6.95117	NA	24.0992	NA	NA	16.3065	9.76417	NA	NA	NA	NA	13.7519	7.31266	-6.94475	NA	NA	NA	NA	22.599	-77.9981	-54.3217	-65.0321	-32.5749	-35.1437	-95.7934	-59.2657	19.0447	-64.7469	-78.6448	-87.2844	-60.3809	-50.1197	-70.0642	NA	NA	1.89678	NA	NA	NA	NA	NA	NA	NA	NA	NA	NA	NA	NA	NA
CEP120_P1P2	3.65956	NA	14.6361	NA	NA	NA	12.1685	NA	NA	NA	NA	6.36093	NA	NA	7.4668	NA	3.28289	NA	NA	NA	NA	NA	NA	NA	NA	NA	NA	NA	NA	NA	NA	NA	NA	NA	NA	NA	NA	NA	NA	NA	NA	NA	4.53317	NA	NA	NA	NA	NA	NA
LDB1_P2	19.2364	NA	24.9986	7.07177	NA	9.28965	16.0287	NA	NA	2.84773	NA	65.0256	NA	-31.2728	NA	NA	NA	NA	NA	NA	NA	NA	NA	NA	NA	NA	NA	NA	NA	NA	NA	NA	NA	NA	NA	NA	NA	NA	NA	NA	NA	NA	NA	NA	NA	NA	NA	NA	NA
ALG13_P1P2	19.2042	-10.282	21.5015	NA	-4.05383	-16.609	25.4732	NA	NA	NA	NA	16.9951	-3.7369	-1.73585	13.1744	NA	7.31887	NA	NA	NA	NA	NA	NA	NA	NA	NA	NA	NA	NA	NA	NA	NA	NA	NA	NA	NA	NA	NA	NA	NA	6.68847	NA	NA	NA	NA	NA	-3.5055	NA	NA
C19orf40_P1P2	6.91316	NA	14.0015	NA	NA	NA	12.7875	NA	NA	NA	NA	6.94425	NA	23.5869	6.02128	NA	4.30483	NA	NA	NA	NA	NA	NA	NA	NA	NA	NA	NA	NA	NA	NA	NA	NA	NA	NA	NA	NA	NA	NA	NA	NA	NA	NA	NA	NA	NA	NA	NA	NA
GAL3ST2_P1P2	3.1226	NA	NA	NA	NA	NA	NA	NA	NA	NA	NA	NA	NA	NA	NA	NA	NA	NA	NA	NA	NA	NA	NA	NA	NA	NA	NA	NA	NA	NA	NA	NA	NA	NA	NA	NA	NA	NA	NA	NA	NA	NA	NA	NA	NA	NA	NA	NA	NA
TONSL_P1P2	7.23843	NA	18.5301	10.7519	NA	NA	12.636	14.0306	NA	NA	NA	27.1135	NA	18.8981	NA	NA	NA	NA	13.0898	-29.2576	-47.0133	1.4141	NA	-10.2405	-32.1048	-25.6209	23.9817	NA	-66.6956	-46.7402	-29.2059	-14.004	-12.4977	NA	NA	8.87167	NA	NA	NA	NA	15.8165	NA	NA	NA	NA	NA	NA	NA	NA
BMS1_P1P2	52.4894	NA	76.9189	NA	NA	NA	55.438	40.0697	5.80702	5.70251	NA	83.3101	NA	-15.5048	NA	NA	NA	NA	NA	NA	NA	NA	NA	NA	NA	NA	NA	NA	NA	NA	NA	NA	NA	NA	NA	9.60969	-10.1948	NA	NA	NA	48.7035	NA	2.26168	NA	NA	NA	NA	NA	NA
TNNI1_P2	6.89384	NA	NA	NA	NA	NA	NA	NA	NA	NA	NA	NA	NA	NA	NA	NA	NA	NA	NA	NA	NA	NA	NA	NA	NA	NA	NA	NA	NA	NA	NA	NA	NA	NA	NA	NA	NA	NA	NA	NA	NA	NA	NA	NA	NA	NA	-1.85801	NA	NA
SACM1L_P1P2	3.3961	NA	NA	2.76005	NA	4.05974	NA	NA	NA	NA	NA	6.59628	3.36669	-4.56495	NA	NA	3.94721	NA	NA	NA	NA	NA	NA	NA	NA	NA	NA	NA	NA	NA	NA	NA	NA	NA	NA	NA	NA	NA	NA	NA	NA	NA	NA	NA	NA	NA	NA	NA	NA
HAT1_P1P2	5.83712	NA	NA	NA	NA	NA	NA	NA	NA	NA	NA	NA	NA	-3.01484	NA	NA	NA	NA	NA	NA	NA	NA	NA	NA	NA	NA	NA	NA	NA	NA	NA	NA	NA	NA	NA	NA	NA	NA	NA	NA	NA	NA	NA	NA	NA	NA	NA	NA	NA
KIAA1958_P1P2	7.782	NA	NA	NA	NA	NA	NA	NA	NA	NA	NA	NA	NA	NA	NA	NA	NA	NA	NA	NA	NA	NA	NA	NA	NA	NA	NA	NA	NA	NA	NA	NA	NA	NA	NA	NA	NA	NA	NA	NA	NA	NA	NA	NA	NA	NA	NA	NA	NA
NFU1_P1P2	9.35396	NA	6.40618	NA	17.5423	NA	24.6096	NA	NA	NA	NA	NA	NA	NA	NA	NA	6.78121	NA	NA	NA	NA	NA	NA	NA	NA	NA	NA	NA	NA	NA	NA	NA	NA	NA	NA	NA	-1.95659	NA	NA	NA	3.31987	NA	NA	NA	NA	NA	NA	-13.226	NA
MSH6_P1P2	1.46589	NA	NA	NA	NA	NA	NA	NA	NA	NA	NA	NA	NA	NA	NA	NA	NA	NA	NA	NA	NA	NA	NA	NA	NA	NA	NA	NA	NA	NA	NA	NA	NA	NA	NA	NA	NA	NA	NA	NA	NA	NA	NA	NA	NA	NA	NA	NA	NA
RPL18_P1P2	31.1913	NA	69.4379	NA	-34.1054	NA	30.0075	NA	NA	NA	NA	72.1069	NA	-6.27228	NA	NA	NA	NA	NA	NA	NA	NA	NA	NA	NA	NA	NA	NA	NA	NA	NA	NA	NA	NA	NA	9.4185	NA	NA	NA	NA	41.0503	NA	NA	NA	NA	NA	NA	NA	NA
DCP2_P1P2	3.74898	-4.54304	13.8464	12.3295	NA	-9.97014	26.5303	NA	NA	-17.2382	NA	16.1574	NA	-4.30194	18.0076	NA	17.4691	NA	NA	NA	NA	NA	NA	NA	NA	NA	NA	NA	NA	NA	NA	NA	NA	NA	NA	NA	NA	NA	NA	NA	3.31405	NA	NA	NA	NA	NA	NA	NA	NA
ORC1_P1P2	11.7608	NA	15.8514	NA	NA	NA	9.15579	-7.40677	NA	NA	NA	17.9736	NA	NA	NA	NA	NA	NA	21.8532	-27.3947	-48.0967	-5.96542	-8.46353	-14.2232	-29.5168	-12.4595	29.7545	-41.7005	-62.7838	-44.4139	-37.5911	-29.5195	-38.0313	NA	NA	NA	NA	NA	NA	NA	NA	NA	NA	NA	NA	NA	NA	NA	NA
TCERG1_P1P2	35.9228	NA	55.0189	NA	12.7285	5.75637	42.3528	NA	NA	-5.97433	NA	60.2722	NA	-7.5944	6.62163	NA	10.4813	NA	35.4444	-59.9984	-44.4852	NA	NA	-26.4471	-62.2173	-47.5076	37.2886	-33.6383	-64.9589	-54.4404	-50.3634	-59.8837	-79.9153	NA	NA	11.1595	NA	NA	NA	NA	23.893	NA	NA	NA	NA	NA	NA	NA	NA
PFN1_P1P2	8.55842	NA	12.0123	NA	-0.32566	NA	14.4581	NA	NA	NA	NA	21.6095	NA	-8.11073	NA	NA	NA	NA	NA	NA	NA	NA	NA	NA	NA	NA	NA	NA	NA	NA	NA	NA	NA	NA	NA	NA	NA	NA	NA	NA	4.82298	-4.10485	NA	NA	NA	NA	NA	NA	NA
C6orf106_P1P2	2.69005	NA	NA	NA	NA	NA	NA	NA	NA	NA	NA	NA	NA	NA	NA	NA	NA	NA	NA	NA	NA	NA	NA	NA	NA	NA	NA	NA	NA	NA	NA	NA	NA	NA	NA	NA	NA	NA	NA	NA	NA	NA	NA	NA	NA	NA	NA	NA	NA
WDR55_P1P2	27.2926	NA	53.6024	NA	-32.3654	NA	24.6995	NA	NA	4.39368	NA	68.4008	-20.9301	-3.06066	NA	NA	NA	NA	NA	NA	NA	NA	NA	NA	NA	NA	NA	NA	NA	NA	NA	NA	NA	NA	NA	13.9345	NA	NA	NA	NA	24.3664	NA	NA	NA	NA	NA	NA	NA	NA
INTS7_P1P2	15.8074	NA	37.4057	NA	NA	NA	20.6083	47.9797	NA	NA	NA	24.899	NA	NA	NA	NA	NA	NA	NA	NA	NA	NA	NA	NA	NA	NA	NA	NA	NA	NA	NA	NA	NA	NA	NA	NA	NA	NA	NA	NA	NA	NA	NA	NA	NA	NA	NA	NA	NA
ZCCHC6_P1P2	3.01228	NA	13.5337	NA	-4.4881	-4.25482	15.9307	NA	NA	-5.71521	NA	6.81748	-3.13991	-1.47666	NA	NA	NA	NA	NA	NA	NA	NA	NA	NA	NA	NA	NA	NA	NA	NA	NA	NA	NA	2.15733	NA	NA	NA	NA	NA	NA	NA	NA	NA	NA	NA	NA	-1.4528	NA	NA
GSE1_P1P2	2.37556	NA	NA	NA	NA	NA	NA	NA	NA	NA	NA	NA	NA	NA	NA	NA	NA	NA	NA	NA	NA	NA	NA	NA	NA	NA	NA	NA	NA	NA	NA	NA	NA	NA	NA	NA	NA	NA	NA	NA	NA	NA	NA	NA	NA	NA	NA	NA	NA
ZNF511_P1P2	6.9095	NA	17.8741	NA	NA	NA	15.1886	NA	NA	NA	NA	21.5809	NA	-9.54575	NA	NA	NA	NA	NA	NA	NA	NA	NA	NA	NA	NA	NA	NA	NA	NA	NA	NA	NA	NA	NA	NA	NA	NA	NA	NA	NA	NA	NA	NA	NA	NA	NA	NA	NA
C9orf114_P1P2	28.7158	NA	63.8506	NA	-17.2253	NA	37.9081	6.22846	NA	NA	NA	61.5983	NA	NA	NA	NA	NA	NA	NA	NA	NA	NA	NA	NA	NA	NA	NA	NA	NA	NA	NA	NA	NA	NA	NA	NA	NA	NA	NA	NA	33.7175	NA	NA	NA	NA	NA	NA	NA	NA
NGDN_P1P2	6.10972	NA	25.4714	NA	NA	NA	22.1038	4.12365	NA	NA	NA	50.1566	NA	-12.1864	NA	NA	NA	NA	NA	NA	NA	NA	NA	NA	NA	NA	NA	NA	NA	NA	NA	NA	NA	NA	NA	NA	NA	NA	NA	NA	NA	NA	NA	NA	NA	NA	NA	NA	NA
SMG5_P1P2	4.40836	NA	17.9302	NA	8.50308	NA	20.8845	NA	NA	NA	NA	24.9052	4.42126	NA	NA	NA	NA	NA	NA	NA	NA	NA	NA	NA	NA	NA	NA	NA	NA	NA	NA	NA	NA	NA	NA	4.14135	NA	NA	NA	NA	NA	NA	NA	NA	NA	NA	NA	NA	NA
RPP40_P1P2	38.6798	NA	72.9745	NA	-23.59	-8.11797	61.6095	NA	NA	-6.08135	NA	87.4931	-12.8435	-9.08224	NA	NA	NA	NA	NA	NA	NA	NA	NA	NA	NA	NA	NA	NA	NA	NA	NA	NA	NA	NA	NA	5.41853	NA	NA	NA	NA	6.96707	NA	NA	NA	NA	NA	NA	NA	NA
NDUFB5_P1P2	6.00669	NA	NA	NA	NA	NA	NA	NA	NA	NA	NA	19.3981	NA	-5.05391	NA	NA	NA	NA	NA	NA	NA	NA	NA	NA	NA	NA	NA	NA	NA	NA	NA	NA	NA	NA	NA	NA	NA	NA	NA	NA	NA	NA	NA	NA	NA	NA	NA	NA	NA
LARS2_P1P2	26.6679	NA	48.6766	NA	NA	-12.01	39.129	NA	NA	NA	NA	61.1366	-7.79603	-10.3022	NA	NA	NA	NA	31.2934	-61.7266	-34.1391	-1.48031	-0.88225	-26.6592	-59.0483	-35.3775	33.3926	-38.6304	-54.3429	-50.4151	-58.8351	-35.0939	-44.767	NA	NA	NA	NA	NA	NA	NA	NA	NA	NA	NA	NA	-17.7672	NA	-17.7578	NA
NLE1_P1P2	56.1905	NA	75.8458	NA	NA	NA	44.2019	4.76273	NA	NA	NA	73.3655	NA	NA	NA	NA	NA	NA	NA	NA	NA	NA	NA	NA	NA	NA	NA	NA	NA	NA	NA	NA	NA	75.5794	NA	9.84609	NA	NA	NA	NA	47.32	NA	NA	NA	NA	NA	NA	NA	NA
CCP110_P1P2	2.28088	NA	NA	NA	10.851	NA	3.47536	NA	NA	NA	NA	NA	NA	NA	NA	NA	NA	NA	NA	NA	NA	NA	NA	NA	NA	NA	NA	NA	NA	NA	NA	NA	NA	5.3953	NA	NA	NA	NA	NA	NA	3.77888	NA	NA	NA	NA	NA	NA	NA	NA
ACAD9_P1P2	9.13877	-4.19142	18.3844	NA	NA	-21.0694	20.8185	NA	NA	NA	NA	16.384	NA	-2.72184	8.44399	-8.12331	4.92645	NA	NA	NA	NA	NA	NA	NA	NA	NA	NA	NA	NA	NA	NA	NA	NA	7.4453	-6.86432	NA	NA	NA	NA	NA	NA	NA	NA	NA	NA	NA	-3.87642	-8.44332	NA
ISY1-RAB43_P1P2	3.46757	NA	5.4735	NA	NA	NA	NA	NA	NA	NA	NA	14.0491	NA	NA	NA	NA	NA	NA	NA	NA	NA	NA	NA	NA	NA	NA	NA	NA	NA	NA	NA	NA	NA	NA	NA	NA	NA	NA	NA	NA	NA	NA	NA	NA	NA	NA	NA	NA	NA
KIAA0753_P1P2	7.77391	NA	NA	NA	NA	NA	NA	NA	NA	4.66843	NA	NA	NA	NA	NA	NA	NA	NA	NA	NA	NA	NA	NA	NA	NA	NA	NA	NA	NA	NA	NA	NA	NA	NA	NA	NA	NA	NA	NA	NA	NA	NA	NA	NA	NA	NA	NA	NA	NA
CDK2AP1_P1P2	5.90263	NA	2.43558	NA	NA	NA	NA	NA	NA	NA	NA	NA	NA	NA	NA	NA	NA	NA	NA	NA	NA	NA	NA	NA	NA	NA	NA	NA	NA	NA	NA	NA	NA	NA	NA	NA	NA	NA	NA	NA	NA	NA	NA	NA	NA	NA	NA	NA	NA
AKAP6_P1P2	1.28841	NA	NA	NA	-2.05059	NA	NA	NA	NA	NA	NA	NA	NA	NA	NA	NA	NA	NA	NA	NA	NA	NA	NA	NA	NA	NA	NA	NA	NA	NA	NA	NA	NA	NA	NA	NA	NA	NA	NA	NA	NA	NA	NA	NA	5.74305	NA	NA	NA	NA
RINT1_P1P2	40.114	19.2787	54.5584	NA	10.8951	25.305	46.2343	NA	NA	NA	NA	72.8842	NA	-4.96301	NA	NA	NA	NA	NA	NA	NA	NA	NA	NA	NA	NA	NA	NA	NA	NA	NA	NA	NA	NA	NA	7.67263	-3.52099	NA	NA	NA	NA	NA	NA	NA	NA	NA	NA	NA	NA
CNOT1_P1P2	12.6612	NA	43.9932	6.19857	8.70797	-7.39292	26.0077	38.2075	NA	-9.02482	NA	28.7793	NA	NA	NA	NA	NA	NA	34.5945	7.27742	NA	20.0957	23.7927	NA	18.3873	4.96221	33.5884	11.8066	NA	6.83711	25.7361	NA	22.0421	70.1417	NA	12.2063	NA	NA	NA	NA	34.7764	-6.63821	-8.48223	NA	NA	NA	NA	NA	NA
BANP_P1P2	7.49119	NA	NA	7.92876	NA	NA	NA	NA	NA	NA	NA	NA	NA	NA	NA	NA	NA	NA	NA	NA	NA	NA	NA	NA	NA	NA	NA	NA	NA	NA	NA	NA	NA	NA	NA	NA	NA	NA	NA	NA	NA	NA	NA	NA	NA	NA	NA	NA	NA
C1QC_P1P2	2.48209	NA	8.65707	NA	NA	NA	NA	NA	NA	NA	NA	NA	NA	NA	NA	NA	NA	NA	NA	NA	NA	NA	NA	NA	NA	NA	NA	NA	NA	NA	NA	NA	NA	NA	NA	NA	NA	NA	NA	NA	NA	NA	NA	NA	NA	NA	NA	NA	NA
UNC50_P1P2	8.35072	NA	32.1657	-22.4396	15.0196	-4.68353	17.5417	NA	NA	NA	NA	14.6754	-5.52086	-1.19681	NA	NA	NA	NA	NA	NA	NA	NA	NA	NA	NA	NA	NA	NA	NA	NA	NA	NA	NA	NA	NA	NA	NA	NA	NA	NA	NA	18.6037	5.58668	NA	NA	NA	NA	NA	NA
NCDN_P1P2	4.79215	NA	NA	NA	NA	NA	6.24744	NA	NA	NA	NA	NA	NA	NA	NA	NA	NA	NA	NA	NA	NA	NA	NA	NA	NA	NA	NA	NA	NA	NA	NA	NA	NA	NA	NA	NA	NA	NA	NA	NA	NA	NA	NA	NA	NA	NA	NA	NA	NA
KCTD10_P1P2	11.3267	NA	48.4624	NA	NA	NA	15.6624	36.3771	NA	NA	NA	57.6973	NA	-18.382	NA	NA	NA	NA	NA	NA	NA	NA	NA	NA	NA	NA	NA	NA	NA	NA	NA	NA	NA	NA	NA	6.29397	NA	NA	NA	NA	4.46486	NA	NA	NA	NA	NA	NA	-4.9996	NA
TAF4_P1P2	5.51406	3.7285	9.27366	NA	NA	NA	NA	13.6827	NA	4.46809	NA	19.1177	NA	NA	NA	NA	NA	NA	NA	NA	NA	NA	NA	NA	NA	NA	NA	NA	NA	NA	NA	NA	NA	NA	NA	8.84504	NA	NA	NA	NA	NA	NA	NA	NA	NA	NA	NA	NA	NA
HIST2H3A_P1P2	3.46499	-2.97646	5.16921	NA	-4.62563	-4.58702	6.87032	16.0649	NA	-1.59889	NA	NA	NA	NA	NA	NA	NA	NA	NA	NA	NA	NA	NA	NA	NA	NA	NA	NA	NA	NA	NA	NA	NA	6.69535	NA	NA	NA	NA	NA	NA	NA	NA	NA	NA	NA	NA	NA	NA	NA
HIST2H3C_ENST00000369158.1	3.46499	-2.97646	5.16921	3.97041	-4.62563	-4.58702	6.87032	19.8543	NA	-1.59889	NA	NA	NA	NA	NA	NA	NA	NA	NA	NA	NA	NA	NA	NA	NA	NA	NA	NA	NA	NA	NA	NA	NA	6.69535	NA	NA	NA	NA	NA	NA	NA	NA	NA	NA	NA	NA	-2.73386	-12.6916	NA
INTS10_P1P2	15.2651	5.48074	30.874	27.3113	NA	27.586	19.6683	NA	NA	NA	NA	33.4976	-5.63208	-16.0191	21.2876	NA	7.12885	NA	NA	NA	NA	NA	NA	NA	NA	NA	NA	NA	NA	NA	NA	NA	NA	6.84208	NA	NA	NA	NA	NA	NA	NA	NA	NA	NA	NA	NA	NA	NA	NA
TAF1B_P1P2	8.49773	NA	24.329	NA	NA	NA	17.6425	NA	NA	NA	NA	45.3073	-19.0421	NA	NA	NA	NA	NA	NA	NA	NA	NA	NA	NA	NA	NA	NA	NA	NA	NA	NA	NA	NA	NA	-1.76499	NA	NA	NA	NA	NA	7.53213	NA	NA	NA	NA	NA	NA	NA	NA
SLC25A53_P1P2	1.9943	NA	NA	NA	NA	NA	NA	NA	NA	NA	NA	NA	NA	NA	NA	NA	NA	NA	NA	NA	NA	NA	NA	NA	NA	NA	NA	NA	NA	NA	NA	NA	NA	NA	NA	NA	NA	NA	NA	NA	NA	NA	NA	NA	NA	NA	-1.66121	NA	NA
MIEF1_P1P2	8.17513	NA	25.6237	4.39865	3.89048	-3.89878	24.0266	NA	NA	NA	NA	15.0556	3.19822	-1.40388	17.4014	-1.48424	9.57657	NA	NA	NA	NA	NA	NA	NA	NA	NA	NA	NA	NA	NA	NA	NA	NA	NA	NA	NA	NA	NA	NA	NA	NA	NA	NA	NA	NA	NA	-6.5013	-21.3923	NA
SS18L2_P1P2	2.10876	-3.09456	NA	NA	NA	NA	NA	11.0129	NA	NA	NA	NA	NA	NA	NA	NA	NA	NA	NA	NA	NA	NA	NA	NA	NA	NA	NA	NA	NA	NA	NA	NA	NA	NA	NA	NA	NA	NA	NA	NA	NA	NA	NA	NA	NA	NA	NA	NA	NA
RRP9_P1P2	36.6077	NA	33.213	NA	-12.3692	-11.5158	52.2521	12.6551	NA	2.61874	NA	57.7593	NA	-11.0853	NA	NA	NA	NA	NA	NA	NA	NA	NA	NA	NA	NA	NA	NA	NA	NA	NA	NA	NA	NA	NA	9.18329	-10.6075	NA	NA	NA	40.0027	NA	NA	NA	NA	NA	NA	NA	NA
COG7_P1P2	5.63375	NA	12.1214	-23.1741	NA	NA	NA	NA	NA	NA	NA	8.42725	-14.2467	NA	NA	NA	NA	NA	NA	NA	NA	NA	NA	NA	NA	NA	NA	NA	NA	NA	NA	NA	NA	NA	NA	NA	NA	NA	NA	NA	NA	NA	NA	NA	NA	NA	NA	NA	NA
OXA1L_P1P2	66.4959	NA	104.16	NA	NA	NA	53.7236	36.8448	4.78338	5.0147	NA	81.3819	15.5599	NA	NA	NA	NA	NA	43.8153	-49.6182	-34.9386	-4.38789	-7.71378	-22.3374	-53.3409	-36.9218	43.7285	NA	-17.5304	NA	-41.5244	-6.39088	NA	15.4283	NA	NA	NA	NA	NA	NA	9.26439	NA	2.82722	NA	NA	NA	-7.90949	-7.99406	NA
CEP55_P1P2	2.27466	NA	5.1904	4.84503	12.2321	NA	10.6244	4.85375	NA	NA	NA	5.95489	NA	6.65342	NA	NA	NA	NA	NA	NA	NA	NA	NA	NA	NA	NA	NA	NA	NA	NA	NA	NA	NA	13.1162	NA	NA	NA	NA	NA	NA	30.7186	NA	NA	NA	NA	NA	NA	NA	-4.0105
MRPS24_P1P2	13.1899	NA	17.8038	NA	4.92024	-11.3451	17.2658	NA	NA	NA	NA	57.2607	NA	-10.0005	NA	NA	NA	NA	14.2826	-58.8977	-31.6754	-6.45113	NA	-18.1028	-56.9835	-18.9431	27.8524	-26.8577	-46.5623	-54.1506	-60.2258	-30.1456	-45.1769	NA	NA	NA	NA	NA	NA	NA	NA	NA	NA	NA	NA	NA	-11.23	-18.357	NA
DMAP1_P1P2	23.69	NA	51.5859	NA	-5.77156	-20.3639	32.1368	NA	NA	-15.1805	NA	52.1708	-4.44013	NA	NA	NA	NA	NA	34.8905	-69.3992	-28.8772	NA	6.33425	-24.7011	-53.9892	-24.8447	34.7423	-43.1567	-31.484	-57.7371	-38.9553	-54.7531	-39.8886	NA	NA	4.38927	NA	NA	NA	NA	52.4298	NA	NA	NA	NA	NA	NA	NA	NA
ELP5_P1P2	5.98236	NA	8.07999	NA	NA	NA	16.0289	NA	NA	-6.24152	NA	20.3337	-21.3961	-3.58609	NA	NA	NA	NA	NA	NA	NA	NA	NA	NA	NA	NA	NA	NA	NA	NA	NA	NA	NA	NA	NA	NA	NA	NA	NA	NA	NA	NA	NA	NA	NA	NA	NA	NA	NA
DNMT1_P1P2	30.4919	NA	37.5619	NA	-33.3562	NA	48.1644	NA	NA	NA	NA	76.1777	-25.4928	NA	14.8217	NA	NA	NA	NA	NA	NA	NA	NA	NA	NA	NA	NA	NA	NA	NA	NA	NA	NA	NA	NA	NA	NA	NA	NA	NA	7.91018	NA	NA	NA	NA	NA	NA	NA	-14.0046
SUN3_P1	0.942552	NA	NA	NA	-3.18029	NA	NA	NA	NA	NA	NA	NA	NA	NA	NA	NA	1.44809	NA	NA	NA	NA	NA	NA	NA	NA	NA	NA	NA	NA	NA	NA	NA	NA	NA	NA	NA	NA	NA	NA	NA	NA	NA	NA	NA	NA	NA	NA	NA	NA
MED22_P1P2	31.5524	NA	66.9299	NA	NA	7.6603	28.6299	NA	NA	9.60848	NA	70.4574	NA	NA	NA	NA	NA	NA	36.8891	-50.6146	-45.865	-35.5539	-27.7107	-25.5802	-60.158	-47.6571	38.6998	-41.1901	-68.352	-70.5031	-52.1742	-51.2145	-56.0186	NA	NA	NA	NA	NA	NA	NA	7.79438	NA	NA	NA	NA	NA	NA	NA	NA
LSM11_P1P2	13.8489	NA	25.1208	NA	16.2975	NA	9.29788	NA	NA	NA	NA	21.6622	-21.5932	-3.18535	NA	NA	NA	NA	NA	NA	NA	NA	NA	NA	NA	NA	NA	NA	NA	NA	NA	NA	NA	NA	NA	3.47694	NA	NA	NA	NA	NA	NA	NA	NA	NA	NA	NA	NA	NA
SPHK2_P1P2	5.03075	NA	18.0003	NA	NA	NA	NA	NA	NA	NA	NA	19.2636	NA	NA	6.04958	NA	NA	NA	NA	NA	NA	NA	NA	NA	NA	NA	NA	NA	NA	NA	NA	NA	NA	NA	NA	NA	NA	NA	NA	NA	NA	NA	NA	NA	NA	NA	NA	NA	NA
HYLS1_P1P2	2.88479	NA	21.092	NA	NA	-11.6115	19.6581	NA	NA	NA	NA	10.3056	NA	-5.34729	10.0747	NA	4.89275	NA	NA	NA	NA	NA	NA	NA	NA	NA	NA	NA	NA	NA	NA	NA	NA	NA	NA	4.03746	NA	NA	NA	NA	NA	NA	NA	NA	NA	NA	NA	NA	NA
GYG1_P1P2	4.37887	NA	NA	NA	NA	NA	NA	NA	NA	NA	NA	NA	NA	NA	NA	NA	NA	NA	NA	NA	NA	NA	NA	NA	NA	NA	NA	NA	NA	NA	NA	NA	NA	NA	NA	NA	NA	NA	NA	NA	NA	NA	NA	NA	NA	NA	NA	NA	NA
EFEMP2_P1P2	7.09136	NA	NA	NA	NA	NA	NA	NA	NA	NA	NA	NA	NA	NA	NA	NA	NA	NA	NA	NA	NA	NA	NA	NA	NA	NA	NA	NA	NA	NA	NA	NA	NA	NA	NA	NA	NA	NA	NA	NA	NA	NA	NA	NA	NA	NA	NA	NA	NA
EFTUD1_P1P2	46.6468	-0.267653	59.538	NA	NA	-5.40346	65.4421	NA	NA	2.70731	NA	88.0364	NA	-40.9709	NA	NA	NA	NA	42.0559	-36.4607	-42.6502	45.9519	10.3676	-3.40207	-0.395867	-54.4076	42.5169	NA	-42.8345	-74.7811	NA	NA	-47.5962	56.692	-23.8221	NA	NA	NA	NA	NA	27.8577	NA	NA	NA	NA	NA	NA	NA	NA
GART_P1P2	47.7909	NA	84.0778	NA	NA	NA	52.6071	NA	NA	2.21478	NA	90.6374	-6.12809	-18.1098	NA	NA	NA	NA	NA	NA	NA	NA	NA	NA	NA	NA	NA	NA	NA	NA	NA	NA	NA	14.7078	NA	NA	NA	NA	NA	NA	11.2855	NA	-2.52334	NA	NA	NA	NA	NA	NA
CD99L2_P1P2	8.74044	NA	14.2936	NA	NA	NA	NA	NA	NA	NA	NA	85.3156	NA	-2.35923	NA	NA	NA	NA	NA	NA	NA	NA	NA	NA	NA	NA	NA	NA	NA	NA	NA	NA	NA	NA	NA	NA	NA	1.66113	NA	NA	NA	NA	NA	NA	NA	NA	NA	NA	NA
NDC80_P1P2	36.3307	NA	73.1291	NA	25.8773	NA	37.0504	11.5604	NA	-3.05061	NA	78.7842	NA	NA	NA	NA	NA	NA	NA	NA	NA	NA	NA	NA	NA	NA	NA	NA	NA	NA	NA	NA	NA	15.6717	NA	6.85832	-2.7821	NA	NA	NA	10.4176	NA	NA	NA	NA	NA	NA	NA	NA
SMG8_P1P2	1.82501	NA	NA	NA	NA	NA	1.94036	4.43913	NA	NA	NA	NA	NA	NA	NA	NA	NA	NA	NA	NA	NA	NA	NA	NA	NA	NA	NA	NA	NA	NA	NA	NA	NA	NA	NA	NA	NA	NA	NA	NA	NA	NA	NA	NA	NA	NA	NA	NA	NA
NOP14_P1P2	41.7049	-12.1995	44.3453	NA	-22.6661	-12.0325	26.4421	22.2285	NA	NA	NA	24.5861	NA	-13.6648	NA	NA	NA	NA	NA	NA	NA	NA	NA	NA	NA	NA	NA	NA	NA	NA	NA	NA	NA	NA	NA	NA	NA	NA	NA	NA	34.9018	NA	NA	NA	NA	NA	6.36866	NA	NA
DNM2_P1P2	30.0715	NA	18.5329	17.9388	29.8391	NA	37.1095	NA	NA	NA	NA	20.167	-5.43732	NA	NA	NA	NA	NA	NA	NA	NA	NA	NA	NA	NA	NA	NA	NA	NA	NA	NA	NA	NA	NA	NA	NA	NA	NA	NA	NA	7.5461	NA	NA	NA	NA	NA	NA	NA	NA
ETF1_P1P2	8.71757	NA	21.8612	NA	-17.2895	NA	12.802	NA	NA	3.71998	NA	18.7412	NA	-2.01659	NA	NA	NA	NA	NA	NA	NA	NA	NA	NA	NA	NA	NA	NA	NA	NA	NA	NA	NA	NA	NA	4.00657	NA	NA	NA	NA	NA	NA	NA	NA	NA	NA	NA	-12.6746	NA
EMILIN2_P1P2	3.8054	NA	NA	NA	NA	NA	NA	NA	NA	NA	NA	NA	NA	NA	NA	NA	NA	NA	NA	NA	NA	NA	NA	NA	NA	NA	NA	NA	NA	NA	NA	NA	NA	NA	NA	NA	NA	0.709886	NA	NA	NA	NA	NA	NA	NA	NA	NA	NA	NA
FAM65A_P1	7.28779	NA	NA	NA	NA	NA	9.79948	NA	NA	NA	NA	NA	NA	NA	NA	NA	NA	NA	NA	NA	NA	NA	NA	NA	NA	NA	NA	NA	NA	NA	NA	NA	NA	NA	NA	NA	NA	NA	NA	NA	NA	NA	1.36994	NA	NA	NA	NA	NA	NA
EIF6_P1P2	51.4499	NA	91.6738	9.73035	58.0797	-19.5852	46.2495	14.2837	NA	NA	NA	86.6537	NA	-7.37027	NA	NA	NA	NA	48.1162	-32.9421	-12.6575	NA	NA	-6.99704	-18.8125	-23.1107	43.526	NA	NA	-33.0417	NA	NA	NA	NA	NA	10.2152	NA	NA	NA	NA	42.8933	-5.88121	NA	NA	NA	NA	8.10989	-7.37873	NA
PTPN1_P1P2	7.63285	21.2827	NA	15.7181	41.9929	15.4639	12.4179	26.1288	NA	NA	NA	NA	NA	NA	NA	NA	NA	NA	NA	42.4607	42.6164	75.3471	51.5214	31.7136	52.0921	25.1703	-0.921686	56.3232	65.7916	73.6732	81.9222	27.462	55.141	NA	NA	NA	NA	NA	NA	NA	NA	NA	NA	NA	NA	NA	NA	NA	NA
DDX54_P1	22.3814	NA	47.9749	NA	-3.51898	NA	31.484	NA	NA	NA	NA	46.2567	NA	NA	NA	NA	NA	NA	NA	NA	NA	NA	NA	NA	NA	NA	NA	NA	NA	NA	NA	NA	NA	NA	NA	NA	NA	NA	NA	NA	13.3585	NA	NA	NA	NA	NA	NA	NA	NA
TPRKB_P1P2	12.3512	NA	15.7883	NA	NA	NA	13.8548	NA	NA	NA	NA	60.2765	NA	-5.46728	NA	NA	NA	NA	NA	NA	NA	NA	NA	NA	NA	NA	NA	NA	NA	NA	NA	NA	NA	NA	NA	NA	NA	NA	NA	NA	NA	NA	NA	NA	NA	NA	NA	NA	NA
NUFIP1_P1P2	6.44374	NA	12.7304	NA	-13.3898	NA	11.1984	5.96772	NA	1.9018	NA	58.2885	-17.6628	-2.07369	NA	NA	NA	NA	NA	NA	NA	NA	NA	NA	NA	NA	NA	NA	NA	NA	NA	NA	NA	NA	NA	7.56053	-3.04368	NA	NA	NA	7.59113	NA	NA	NA	NA	NA	NA	NA	NA
MLLT1_P1P2	3.90085	8.0734	13.9399	NA	NA	15.04	11.7027	-5.03309	NA	NA	NA	NA	NA	NA	NA	NA	6.19164	NA	NA	NA	NA	NA	NA	NA	NA	NA	NA	NA	NA	NA	NA	NA	NA	NA	NA	NA	NA	NA	NA	NA	NA	NA	NA	NA	NA	NA	NA	NA	17.5648
SNIP1_P1P2	10.1057	NA	26.3409	NA	16.6195	NA	12.4697	NA	NA	NA	NA	44.2588	NA	-6.2891	NA	NA	NA	NA	NA	NA	NA	NA	NA	NA	NA	NA	NA	NA	NA	NA	NA	NA	NA	NA	NA	6.21926	-8.8062	NA	NA	NA	3.65132	NA	NA	NA	NA	NA	NA	NA	NA
MED6_P1P2	40.8785	NA	68.0451	NA	7.2824	-0.15578	46.2537	NA	NA	NA	NA	84.3009	NA	-17.6544	NA	NA	NA	NA	NA	NA	NA	NA	NA	NA	NA	NA	NA	NA	NA	NA	NA	NA	NA	NA	NA	NA	NA	NA	NA	NA	NA	NA	NA	NA	NA	NA	NA	NA	NA
ACTR8_P1P2	6.49886	-8.02343	22.8062	22.1642	NA	-10.5228	21.029	NA	11.6383	3.74312	NA	14.6276	-29.2117	NA	NA	NA	NA	NA	NA	NA	NA	NA	NA	NA	NA	NA	NA	NA	NA	NA	NA	NA	NA	NA	NA	NA	NA	NA	NA	NA	13.2521	NA	NA	NA	NA	NA	NA	NA	34.5904
DUSP16_P1P2	2.62275	NA	NA	NA	NA	NA	NA	NA	NA	NA	NA	NA	NA	NA	NA	NA	NA	NA	NA	NA	NA	NA	NA	NA	NA	NA	NA	NA	NA	NA	NA	NA	NA	NA	NA	NA	NA	NA	NA	NA	NA	NA	NA	NA	NA	NA	NA	3.19309	NA
MRPL15_P1P2	28.4297	-9.25177	36.2808	2.28668	7.56986	-20.1001	23.7455	6.89685	NA	1.78425	NA	47.5577	NA	-8.5707	NA	NA	NA	NA	NA	NA	NA	NA	NA	NA	NA	NA	NA	NA	NA	NA	NA	NA	NA	NA	NA	NA	-5.07691	NA	NA	NA	NA	NA	NA	NA	NA	NA	-8.29497	-16.6687	NA
FAM200B_P1P2	2.68683	NA	NA	NA	NA	NA	NA	NA	NA	NA	NA	NA	NA	NA	NA	NA	NA	NA	NA	NA	NA	NA	NA	NA	NA	NA	NA	NA	NA	NA	NA	NA	NA	NA	NA	NA	NA	NA	NA	NA	NA	NA	NA	NA	NA	NA	NA	NA	NA
PNN_P1P2	24.3621	NA	41.1777	7.55273	NA	NA	27.2374	12.8217	NA	NA	NA	40.6627	NA	-3.23732	NA	NA	NA	NA	NA	NA	NA	NA	NA	NA	NA	NA	NA	NA	NA	NA	NA	NA	NA	NA	NA	3.59856	-2.1502	NA	NA	NA	4.63001	NA	NA	NA	NA	NA	NA	NA	NA
PAXBP1_P1P2	39.8926	NA	51.5123	NA	NA	NA	26.2307	8.76854	NA	-7.71477	NA	56.5312	-11.9989	NA	12.2921	NA	NA	NA	NA	NA	NA	NA	NA	NA	NA	NA	NA	NA	NA	NA	NA	NA	NA	NA	NA	NA	NA	NA	NA	NA	NA	NA	NA	NA	NA	NA	NA	NA	NA
UQCRC1_P1	19.198	NA	31.2266	NA	NA	NA	15.5979	NA	NA	NA	NA	45.4956	NA	-9.94914	NA	NA	NA	NA	NA	NA	NA	NA	NA	NA	NA	NA	NA	NA	NA	NA	NA	NA	NA	NA	NA	NA	-2.63529	NA	NA	NA	22.366	-3.43186	2.14704	NA	NA	-8.7466	NA	-24.2475	NA
LOC100133267_NM	1.63949	NA	1.00208	NA	-5.94526	-1.09303	NA	NA	NA	NA	NA	NA	NA	NA	NA	NA	NA	NA	NA	NA	NA	NA	NA	NA	NA	NA	NA	NA	NA	NA	NA	NA	NA	NA	NA	NA	NA	NA	NA	NA	NA	NA	NA	NA	NA	NA	NA	NA	NA
SF3A2_P1	33.7148	NA	82.2505	NA	NA	NA	22.1471	14.4014	NA	-4.04999	NA	73.6453	NA	NA	14.7172	NA	NA	NA	NA	NA	NA	NA	NA	NA	NA	NA	NA	NA	NA	NA	NA	NA	NA	103.241	-19.4007	23.6982	NA	NA	NA	NA	111.964	NA	NA	NA	NA	NA	NA	NA	NA
PTPLB_P1P2	4.07661	NA	9.55181	NA	NA	NA	4.6465	NA	NA	NA	NA	NA	NA	NA	27.6403	-9.14941	19.0691	-5.32028	12.8393	-63.4828	-44.9274	-9.51913	NA	-34.8634	-78.4521	-48.7745	19.8012	-63.6842	-83.1038	-94.3632	-64.9371	-60.1567	-85.6533	NA	NA	NA	NA	NA	NA	NA	NA	NA	NA	NA	NA	NA	NA	NA	NA
NUP50_P1P2	2.35148	NA	NA	NA	NA	NA	NA	NA	NA	NA	NA	NA	NA	NA	NA	NA	NA	NA	NA	NA	NA	NA	NA	NA	NA	NA	NA	NA	NA	NA	NA	NA	NA	NA	NA	NA	NA	NA	NA	NA	NA	NA	NA	NA	NA	NA	-2.04779	NA	NA
KIF20B_P1P2	3.26312	NA	NA	NA	NA	NA	NA	NA	NA	NA	NA	3.64026	-12.797	NA	NA	NA	NA	NA	NA	NA	NA	NA	NA	NA	NA	NA	NA	NA	NA	NA	NA	NA	NA	NA	NA	NA	NA	NA	NA	NA	NA	NA	NA	NA	NA	NA	NA	NA	NA
PRSS8_P1P2	1.94603	NA	NA	NA	NA	NA	NA	NA	NA	NA	NA	NA	NA	NA	NA	NA	NA	NA	NA	NA	NA	NA	NA	NA	NA	NA	NA	NA	NA	NA	NA	NA	NA	NA	NA	NA	NA	NA	NA	NA	NA	NA	NA	NA	NA	NA	NA	NA	NA
PYROXD1_P1P2	11.6793	NA	22.7291	NA	NA	NA	29.4042	NA	NA	NA	NA	18.0414	-21.3298	-2.37699	NA	NA	NA	NA	NA	NA	NA	NA	NA	NA	NA	NA	NA	NA	NA	NA	NA	NA	NA	NA	NA	NA	NA	NA	NA	NA	NA	NA	NA	NA	NA	NA	NA	NA	NA
TP53RK_P1P2	10.6663	NA	14.4722	NA	NA	-7.04483	27.4987	NA	NA	NA	NA	22.1806	-7.49916	-8.32758	11.5215	NA	3.73361	NA	NA	NA	NA	NA	NA	NA	NA	NA	NA	NA	NA	NA	NA	NA	NA	NA	NA	NA	NA	NA	NA	NA	NA	NA	NA	NA	NA	NA	NA	NA	NA
ANAPC4_P1P2	69.5015	NA	106.079	NA	30.1785	NA	59.5148	12.5616	NA	-14.8964	NA	79.5833	NA	NA	NA	NA	NA	NA	NA	NA	NA	NA	NA	NA	NA	NA	NA	NA	NA	NA	NA	NA	NA	8.13078	NA	17.9946	-11.4558	NA	NA	NA	96.3495	NA	NA	NA	NA	NA	NA	NA	NA
EXOSC10_P1P2	25.0545	-3.16971	35.8863	3.40367	-33.7485	-5.72243	31.1439	37.095	NA	NA	NA	46.3601	-6.40404	-10.3427	NA	NA	NA	NA	NA	NA	NA	NA	NA	NA	NA	NA	NA	NA	NA	NA	NA	NA	NA	NA	NA	NA	NA	NA	NA	NA	6.20221	NA	NA	NA	NA	NA	NA	NA	NA
TMF1_P1P2	2.32553	NA	2.58214	NA	NA	NA	NA	NA	NA	NA	NA	NA	NA	NA	NA	NA	NA	NA	NA	NA	NA	NA	NA	NA	NA	NA	NA	NA	NA	NA	NA	NA	NA	NA	NA	NA	NA	NA	NA	NA	NA	NA	NA	NA	NA	NA	NA	NA	NA
TSR1_P1	20.2752	NA	20.4706	NA	NA	NA	8.34933	NA	NA	NA	NA	20.0519	NA	-1.63675	NA	NA	NA	NA	NA	NA	NA	NA	NA	NA	NA	NA	NA	NA	NA	NA	NA	NA	NA	NA	NA	NA	NA	NA	NA	NA	NA	NA	NA	NA	NA	NA	NA	NA	NA
GALNT8_ENST00000252318.2	5.64049	NA	NA	NA	NA	NA	NA	NA	NA	NA	NA	NA	NA	NA	NA	NA	NA	NA	NA	NA	NA	NA	NA	NA	NA	NA	NA	NA	NA	NA	NA	NA	NA	NA	NA	NA	NA	NA	NA	NA	NA	NA	NA	NA	NA	NA	NA	NA	NA
PPP2R1A_P1	17.5702	NA	37.4461	NA	15.8745	11.7865	23.6906	50.4547	NA	1.69014	NA	34.4797	-13.3994	-46.345	18.3135	NA	6.15124	NA	21.2652	-99.389	-31.7873	-43.7404	-21.2722	-35.7935	-89.598	-72.0739	22.315	-69.709	33.6247	-102.952	-80.0221	-78.5906	-101.773	7.01525	-12.9372	9.73959	-7.43124	NA	NA	NA	20.3373	NA	NA	NA	NA	NA	-5.413	-12.8113	NA
PSMA6_P1P2	15.7039	NA	23.5755	NA	19.8148	NA	10.5777	17.5177	NA	NA	NA	43.3933	NA	-7.85244	NA	NA	NA	NA	NA	NA	NA	NA	NA	NA	NA	NA	NA	NA	NA	NA	NA	NA	NA	NA	NA	10.7806	-4.83498	NA	NA	NA	16.6483	NA	NA	NA	NA	NA	NA	NA	NA
YBEY_P1P2	4.5373	-2.40843	5.78009	NA	NA	-3.71146	NA	3.20519	NA	NA	NA	9.57971	-9.57743	-4.08036	NA	NA	NA	NA	NA	NA	NA	NA	NA	NA	NA	NA	NA	NA	NA	NA	NA	NA	NA	NA	NA	NA	NA	NA	NA	NA	NA	NA	NA	NA	NA	NA	-3.37322	NA	NA
MED13L_P1P2	3.0736	NA	NA	8.65332	-4.85043	16.5247	NA	NA	NA	NA	NA	NA	NA	NA	NA	NA	NA	NA	NA	NA	NA	NA	NA	NA	NA	NA	NA	NA	NA	NA	NA	NA	NA	NA	NA	NA	NA	NA	NA	NA	NA	NA	NA	NA	NA	NA	NA	NA	NA
CHAF1A_P1P2	25.7798	NA	41.2229	NA	NA	NA	35.0804	NA	NA	-26.1114	NA	62.9581	-24.2889	-4.37628	13.8265	NA	NA	NA	24.9158	-30.2479	-22.5763	NA	NA	-11.4154	-31.4084	-27.3274	38.0596	NA	-51.9302	NA	-10.3227	-46.8848	NA	NA	NA	NA	NA	NA	NA	NA	NA	NA	NA	NA	NA	NA	NA	NA	NA
NAPG_P1P2	3.81445	12.6899	15.0306	NA	18.224	11.9395	6.96784	NA	NA	NA	NA	13.6569	NA	-4.81199	NA	NA	NA	NA	NA	NA	NA	NA	NA	NA	NA	NA	NA	NA	NA	NA	NA	NA	NA	NA	NA	NA	NA	NA	NA	NA	NA	NA	NA	NA	NA	NA	NA	NA	NA
CRNKL1_P1P2	29.7944	NA	71.6398	NA	NA	NA	30.3205	25.7926	NA	-13.9544	NA	34.6049	NA	-8.01669	NA	NA	NA	NA	NA	NA	NA	NA	NA	NA	NA	NA	NA	NA	NA	NA	NA	NA	NA	NA	NA	8.43619	NA	NA	NA	NA	13.9459	NA	NA	NA	NA	NA	NA	NA	NA
MYH7B_P1P2	2.29164	NA	NA	NA	NA	NA	NA	NA	NA	NA	NA	NA	NA	NA	NA	NA	NA	NA	NA	NA	NA	NA	NA	NA	NA	NA	NA	NA	NA	NA	NA	NA	NA	NA	NA	NA	NA	NA	NA	NA	NA	NA	NA	NA	NA	NA	NA	NA	NA
TTC14_P1P2	6.98077	NA	6.30253	NA	-6.87511	NA	12.0515	NA	NA	NA	NA	8.41684	-6.08591	-5.13637	2.64339	NA	NA	NA	NA	NA	NA	NA	NA	NA	NA	NA	NA	NA	NA	NA	NA	NA	NA	NA	NA	NA	NA	NA	NA	NA	NA	NA	NA	NA	NA	NA	NA	NA	NA
NCBP2_P1P2	30.8047	NA	48.0892	8.74399	NA	-3.46134	21.1284	NA	NA	26.8589	NA	59.0702	-3.72911	NA	NA	NA	NA	NA	NA	NA	NA	NA	NA	NA	NA	NA	NA	NA	NA	NA	NA	NA	NA	37.4598	-32.184	NA	NA	NA	NA	NA	NA	1.86414	NA	NA	NA	NA	NA	NA	NA
CDK12_P1P2	15.5917	NA	18.6647	-34.6668	-3.62549	NA	25.6953	NA	NA	NA	NA	15.9905	-13.9943	NA	NA	NA	4.64443	NA	NA	NA	NA	NA	NA	NA	NA	NA	NA	NA	NA	NA	NA	NA	NA	NA	NA	3.63771	NA	NA	NA	NA	NA	3.33794	NA	NA	NA	NA	NA	NA	NA
RRN3_P1P2	20.7284	NA	42.2943	NA	NA	NA	38.4391	NA	NA	NA	NA	59.1812	NA	NA	NA	NA	NA	NA	NA	NA	NA	NA	NA	NA	NA	NA	NA	NA	NA	NA	NA	NA	NA	NA	NA	9.90836	NA	NA	NA	NA	NA	NA	NA	NA	NA	NA	NA	NA	NA
ABHD13_P1P2	4.65039	NA	NA	NA	NA	NA	3.0081	NA	NA	NA	NA	NA	NA	NA	9.08157	NA	5.36593	NA	NA	NA	NA	NA	NA	NA	NA	NA	NA	NA	NA	NA	NA	NA	NA	NA	NA	NA	NA	NA	NA	NA	NA	NA	NA	NA	NA	NA	NA	-2.73023	NA
HAUS7_P1	48.7015	NA	86.778	NA	35.656	NA	48.9614	15.5075	NA	-5.31634	NA	82.6895	NA	NA	NA	NA	NA	NA	NA	NA	NA	NA	NA	NA	NA	NA	NA	NA	NA	NA	NA	NA	NA	36.2391	NA	15.9099	-3.49194	NA	NA	NA	39.7349	NA	NA	NA	NA	NA	NA	NA	NA
TREX2_P1P2	49.6425	NA	87.8616	NA	35.656	NA	48.8465	11.7252	NA	-6.93795	NA	82.6895	NA	NA	NA	NA	NA	NA	NA	NA	NA	NA	NA	NA	NA	NA	NA	NA	NA	NA	NA	NA	NA	36.2391	NA	11.1677	-3.27819	NA	NA	NA	39.7349	NA	NA	NA	NA	NA	NA	NA	NA
PRMT7_P1P2	4.25252	NA	9.14693	-3.8779	NA	NA	8.2219	NA	NA	NA	NA	5.87239	NA	NA	NA	NA	NA	NA	NA	NA	NA	NA	NA	NA	NA	NA	NA	NA	NA	NA	NA	NA	NA	2.80824	NA	NA	NA	NA	NA	NA	2.30496	NA	NA	NA	NA	NA	NA	NA	NA
STRIP1_P1P2	12.0628	8.3168	15.1122	NA	NA	22.7987	8.52743	NA	NA	NA	NA	15.6926	4.37697	-20.1757	NA	NA	NA	NA	NA	NA	NA	NA	NA	NA	NA	NA	NA	NA	NA	NA	NA	NA	NA	NA	NA	NA	NA	NA	NA	NA	NA	9.51193	NA	NA	NA	NA	NA	NA	NA
FANCI_P1P2	2.90981	NA	8.32781	3.6845	7.67533	NA	21.9529	NA	NA	NA	NA	24.4354	NA	NA	NA	NA	NA	NA	NA	NA	NA	NA	NA	NA	NA	NA	NA	NA	NA	NA	NA	NA	NA	NA	NA	NA	NA	NA	NA	NA	NA	NA	NA	NA	NA	NA	NA	NA	NA
INTS1_P1P2	8.69771	NA	6.44838	16.525	NA	NA	4.24569	NA	NA	NA	NA	16.3221	-13.509	-2.17507	NA	NA	NA	NA	NA	NA	NA	NA	NA	NA	NA	NA	NA	NA	NA	NA	NA	NA	NA	NA	NA	NA	NA	NA	NA	NA	NA	NA	NA	NA	NA	NA	NA	NA	NA
CARS2_P1P2	36.8714	-26.0955	41.9134	11.1904	8.26711	-25.9809	36.6392	25.4459	NA	7.49009	NA	49.6394	NA	-8.38295	NA	NA	NA	NA	32.4714	-75.917	-43.547	-10.3544	-15.3128	-30.5385	-77.4922	-44.3506	30.1328	-40.1526	-49.1178	-66.1909	-59.6302	-49.0116	-47.2369	NA	-3.37227	NA	NA	NA	NA	NA	NA	NA	NA	NA	NA	NA	NA	NA	-17.125
FGFBP1_P1P2	1.61802	NA	NA	NA	NA	NA	NA	NA	NA	NA	NA	NA	NA	NA	NA	NA	NA	NA	NA	NA	NA	NA	NA	NA	NA	NA	NA	NA	NA	NA	NA	NA	NA	NA	NA	NA	NA	NA	NA	NA	NA	NA	NA	NA	NA	NA	NA	NA	NA
CASD1_P1P2	4.03368	NA	NA	NA	NA	NA	4.27497	NA	NA	NA	NA	5.8848	NA	NA	NA	NA	NA	NA	NA	NA	NA	NA	NA	NA	NA	NA	NA	NA	NA	NA	NA	NA	NA	NA	NA	NA	NA	3.28663	NA	NA	NA	NA	1.61917	NA	NA	NA	NA	NA	NA
RASGRP1_P1	3.54103	NA	NA	NA	NA	NA	NA	NA	NA	NA	NA	NA	NA	NA	NA	NA	NA	NA	NA	NA	NA	NA	NA	NA	NA	NA	NA	NA	NA	NA	NA	NA	NA	NA	NA	NA	NA	NA	NA	NA	NA	NA	NA	NA	NA	NA	NA	NA	NA
NARS_P1P2	18.7621	NA	53.736	NA	NA	NA	24.7938	NA	NA	-1.0028	NA	31.1506	NA	-9.47641	NA	NA	NA	NA	NA	NA	NA	NA	NA	NA	NA	NA	NA	NA	NA	NA	NA	NA	NA	NA	NA	3.69701	NA	NA	NA	NA	NA	NA	NA	NA	NA	NA	NA	NA	NA
TSR2_P1P2	43.7364	NA	70.6219	NA	12.2716	NA	43.2279	25.177	NA	NA	NA	66.9865	NA	-13.8952	NA	NA	NA	NA	NA	NA	NA	NA	NA	NA	NA	NA	NA	NA	NA	NA	NA	NA	NA	NA	NA	21.8118	-12.8595	NA	NA	NA	72.3566	NA	NA	NA	NA	NA	NA	NA	NA
RPUSD4_P1P2	3.82684	NA	NA	NA	-1.74915	-5.88828	NA	NA	NA	NA	NA	14.9444	-2.50653	NA	NA	NA	NA	NA	NA	NA	NA	NA	NA	NA	NA	NA	NA	NA	NA	NA	NA	NA	NA	NA	NA	NA	NA	NA	NA	NA	NA	NA	NA	NA	NA	NA	-5.18598	NA	NA
SEC61G_P1P2	26.2033	NA	32.3849	NA	NA	NA	21.5434	NA	NA	NA	NA	41.6817	NA	-8.49993	NA	NA	NA	NA	NA	NA	NA	NA	NA	NA	NA	NA	NA	NA	NA	NA	NA	NA	NA	NA	NA	NA	NA	NA	NA	NA	NA	NA	-8.25106	NA	NA	NA	3.02821	NA	NA
ENO3_P2	6.13576	NA	11.7137	NA	NA	NA	7.85974	NA	NA	NA	NA	21.6095	NA	-8.11073	NA	NA	NA	NA	NA	NA	NA	NA	NA	NA	NA	NA	NA	NA	NA	NA	NA	NA	NA	NA	NA	NA	NA	NA	NA	NA	NA	NA	NA	NA	NA	NA	NA	NA	NA
DIS3L_P1P2	6.12194	NA	8.77357	NA	NA	NA	14.4713	-3.71781	NA	-2.07403	NA	NA	NA	NA	3.5519	NA	NA	NA	NA	NA	NA	NA	NA	NA	NA	NA	NA	NA	NA	NA	NA	NA	NA	NA	NA	NA	NA	NA	NA	NA	NA	NA	NA	NA	NA	NA	NA	NA	NA
RPS18_P1P2	33.0459	NA	68.7994	58.7101	-6.17764	NA	32.4641	44.053	NA	NA	NA	54.762	NA	NA	NA	NA	NA	NA	NA	NA	NA	NA	NA	NA	NA	NA	NA	NA	NA	NA	NA	NA	NA	16.7011	-6.368	20.1319	-6.53298	NA	NA	NA	39.8745	NA	NA	NA	NA	NA	NA	0.52989	NA
RPL29_P1P2	6.02855	NA	16.496	NA	-28.7266	NA	13.4045	NA	NA	NA	NA	15.6092	4.50373	-3.94985	NA	NA	NA	NA	NA	NA	NA	NA	NA	NA	NA	NA	NA	NA	NA	NA	NA	NA	NA	NA	NA	NA	NA	NA	NA	NA	3.21518	NA	NA	NA	NA	NA	NA	NA	NA
TAF6_P1P2	12.3347	NA	21.9153	NA	NA	NA	22.2185	NA	NA	9.98584	NA	52.7162	-27.7767	-10.5545	NA	NA	NA	NA	NA	NA	NA	NA	NA	NA	NA	NA	NA	NA	NA	NA	NA	NA	NA	NA	NA	NA	NA	NA	NA	NA	NA	NA	-11.4859	NA	NA	NA	NA	NA	NA
BRD2_P1	7.33056	NA	8.45452	-19.7461	NA	-3.97791	15.5304	NA	NA	NA	NA	NA	NA	NA	6.92497	NA	NA	NA	NA	NA	NA	NA	NA	NA	NA	NA	NA	NA	NA	NA	NA	NA	NA	NA	NA	NA	NA	NA	NA	NA	11.9246	NA	NA	NA	NA	NA	7.79293	13.5139	NA
MRPL2_P1P2	6.7404	NA	15.1587	NA	NA	-10.1035	5.73159	NA	NA	1.49853	NA	46.7738	NA	-4.88008	NA	NA	NA	NA	NA	NA	NA	NA	NA	NA	NA	NA	NA	NA	NA	NA	NA	NA	NA	NA	NA	NA	-1.43748	NA	NA	NA	NA	NA	NA	NA	NA	NA	-3.37239	-21.8285	NA
NRBP1_P1P2	20.7285	NA	24.4784	5.64723	NA	NA	33.762	-9.72375	NA	2.38902	NA	77.9622	NA	-11.9418	NA	NA	NA	NA	35.1627	-74.9256	-72.8447	-21.3365	-11.9661	-41.5155	-95.798	-85.2226	43.3391	-64.42	-110.369	-118.826	-76.5651	-51.6188	-98.7553	NA	NA	NA	NA	NA	NA	NA	NA	NA	5.80462	NA	NA	NA	NA	NA	NA
CCT4_P1P2	41.5694	NA	79.6252	NA	NA	NA	58.0432	8.69626	2.93924	NA	NA	77.1315	-9.49665	-5.7366	NA	NA	NA	NA	NA	NA	NA	NA	NA	NA	NA	NA	NA	NA	NA	NA	NA	NA	NA	21.8342	NA	7.7456	-3.68726	NA	NA	NA	50.0181	NA	1.97793	NA	NA	NA	NA	NA	NA
ABT1_P1P2	3.71429	NA	3.97424	NA	NA	NA	7.22873	4.19421	NA	NA	NA	NA	NA	NA	NA	NA	NA	NA	NA	NA	NA	NA	NA	NA	NA	NA	NA	NA	NA	NA	NA	NA	NA	NA	NA	NA	NA	NA	NA	NA	3.83854	NA	NA	NA	NA	NA	NA	NA	NA
EIF3I_P1P2	24.171	NA	42.2936	NA	12.8935	NA	16.844	7.28071	NA	NA	NA	25.4433	NA	NA	NA	NA	NA	NA	NA	NA	NA	NA	NA	NA	NA	NA	NA	NA	NA	NA	NA	NA	NA	NA	NA	12.93	-7.83818	NA	NA	NA	83.8178	NA	NA	NA	NA	NA	NA	NA	NA
C15orf53_P1P2	3.26201	NA	NA	NA	NA	NA	NA	NA	NA	NA	NA	NA	NA	NA	NA	NA	NA	NA	NA	NA	NA	NA	NA	NA	NA	NA	NA	NA	NA	NA	NA	NA	NA	NA	NA	NA	NA	NA	NA	NA	NA	NA	NA	NA	NA	NA	NA	NA	NA
TRA2B_P1P2	6.93346	NA	14.5662	NA	-9.16892	NA	29.3504	NA	NA	NA	NA	54.0859	-27.0028	-11.612	13.12	NA	NA	NA	NA	NA	NA	NA	NA	NA	NA	NA	NA	NA	NA	NA	NA	NA	NA	NA	NA	NA	NA	NA	NA	NA	3.08401	NA	NA	NA	NA	NA	NA	NA	NA
RBM19_P1P2	12.1658	NA	18.8349	NA	-2.0073	NA	7.49495	33.3644	NA	NA	NA	20.6329	NA	NA	NA	NA	NA	NA	NA	NA	NA	NA	NA	NA	NA	NA	NA	NA	NA	NA	NA	NA	NA	8.52794	NA	6.08743	-10.0794	NA	NA	NA	65.0459	NA	NA	NA	NA	NA	NA	NA	NA
C11orf40_ENST00000307616.1	2.6542	NA	NA	NA	NA	NA	NA	NA	NA	NA	NA	NA	NA	NA	NA	NA	NA	NA	NA	NA	NA	NA	NA	NA	NA	NA	NA	NA	NA	NA	NA	NA	NA	NA	NA	NA	NA	NA	NA	NA	NA	NA	NA	NA	NA	NA	NA	NA	NA
RAD51D_P1P2	4.57019	NA	9.01945	NA	NA	NA	14.2473	NA	NA	NA	NA	NA	NA	NA	NA	NA	NA	NA	NA	NA	NA	NA	NA	NA	NA	NA	NA	NA	NA	NA	NA	NA	NA	18.8592	NA	3.82451	NA	NA	NA	NA	NA	NA	NA	NA	NA	NA	NA	NA	NA
XRN2_P1P2	29.7626	-15.3091	42.4783	NA	-28.3267	-31.2953	40.3725	17.2735	NA	NA	NA	25.0893	-22.222	-7.91774	NA	NA	NA	NA	NA	NA	NA	NA	NA	NA	NA	NA	NA	NA	NA	NA	NA	NA	NA	NA	NA	NA	NA	NA	NA	NA	NA	NA	NA	NA	NA	NA	-2.32565	-11.2645	NA
SON_P2	2.93871	NA	NA	NA	NA	NA	NA	NA	NA	NA	NA	NA	NA	NA	NA	NA	NA	NA	NA	NA	NA	NA	NA	NA	NA	NA	NA	NA	NA	NA	NA	NA	NA	NA	NA	NA	NA	NA	NA	NA	NA	NA	NA	NA	NA	NA	NA	NA	NA
CEP135_P1P2	20.6667	-3.24452	27.7469	NA	NA	-7.84063	30.2876	NA	NA	NA	NA	14.4206	NA	-10.0408	9.56265	NA	9.86027	NA	NA	NA	NA	NA	NA	NA	NA	NA	NA	NA	NA	NA	NA	NA	NA	NA	NA	NA	NA	NA	NA	NA	11.6981	NA	NA	NA	NA	NA	NA	NA	NA
CDT1_P1P2	33.6121	NA	63.4841	NA	NA	NA	24.2718	35.7023	NA	NA	NA	22.0549	NA	NA	NA	NA	NA	NA	NA	NA	NA	NA	NA	NA	NA	NA	NA	NA	NA	NA	NA	NA	NA	10.0241	NA	12.2555	NA	NA	NA	NA	55.1865	NA	NA	NA	NA	NA	NA	NA	NA
RPS16_P1P2	29.5794	NA	52.0529	NA	-2.56612	NA	10.4431	15.3424	NA	NA	NA	22.1843	NA	NA	NA	NA	NA	NA	NA	NA	NA	NA	NA	NA	NA	NA	NA	NA	NA	NA	NA	NA	NA	NA	NA	10.2452	NA	NA	NA	NA	NA	NA	NA	NA	NA	NA	NA	NA	NA
EXOC2_P1P2	11.6514	NA	13.4772	NA	NA	-7.92099	22.0579	NA	NA	NA	NA	18.4657	NA	-6.49318	NA	NA	NA	NA	19.9413	-57.0903	-50.5655	NA	NA	-20.5781	-48.6006	-18.9964	30.9822	-51.7851	-70.7241	-84.1113	-45.7782	-37.5488	-53.8015	44.3571	-27.6529	NA	NA	NA	NA	NA	NA	NA	NA	NA	NA	NA	-3.13355	NA	NA
GTPBP4_P1P2	21.3912	NA	39.2356	NA	-27.3502	NA	17.7111	NA	NA	NA	NA	21.6892	-3.18222	NA	NA	NA	NA	NA	NA	NA	NA	NA	NA	NA	NA	NA	NA	NA	NA	NA	NA	NA	NA	NA	NA	4.78586	NA	NA	NA	NA	36.8106	NA	NA	NA	NA	NA	NA	NA	NA
SLC25A51_P1P2	10.1822	NA	11.2174	NA	NA	-7.24656	11.0877	NA	NA	-4.7225	NA	13.9073	NA	-8.49605	NA	NA	NA	NA	NA	NA	NA	NA	NA	NA	NA	NA	NA	NA	NA	NA	NA	NA	NA	NA	NA	NA	NA	NA	NA	NA	NA	NA	NA	NA	NA	NA	-1.62502	NA	NA
FERMT1_P1P2	5.47942	NA	NA	NA	NA	NA	NA	NA	NA	NA	NA	NA	NA	NA	NA	NA	NA	NA	NA	NA	NA	NA	NA	NA	NA	NA	NA	NA	NA	NA	NA	NA	NA	NA	NA	NA	NA	NA	NA	NA	NA	NA	NA	NA	NA	NA	NA	NA	NA
WDR61_P1P2	5.22252	-15.7889	17.7686	NA	-12.6818	-17.4365	26.8354	NA	NA	-5.10055	NA	15.0786	-15.1343	-2.23517	NA	NA	NA	NA	5.19363	-19.064	-2.57677	9.60464	11.2282	NA	-8.40936	-2.61296	22.8737	-18.855	-15.5925	-48.7432	NA	-28.0983	-10.4015	NA	NA	NA	NA	NA	NA	NA	NA	NA	NA	NA	NA	NA	NA	NA	NA
RBM7_P1P2	4.40839	-6.44449	6.03563	6.25087	-2.47736	NA	19.2736	NA	NA	NA	NA	8.06137	-6.37218	NA	NA	NA	NA	NA	NA	NA	NA	NA	NA	NA	NA	NA	NA	NA	NA	NA	NA	NA	NA	NA	NA	NA	NA	NA	NA	NA	NA	NA	NA	NA	NA	NA	NA	NA	NA
SUB1_P1	5.85201	NA	2.84868	NA	-5.80965	NA	2.24627	NA	NA	NA	NA	4.94431	NA	-2.37406	NA	NA	NA	NA	NA	NA	NA	NA	NA	NA	NA	NA	NA	NA	NA	NA	NA	NA	NA	NA	NA	NA	NA	NA	NA	NA	NA	NA	NA	NA	NA	NA	NA	NA	NA
PWP2_P1P2	27.2991	NA	45.6144	NA	NA	NA	24.2544	30.3716	NA	NA	NA	76.4379	NA	-7.87941	NA	NA	NA	NA	NA	NA	NA	NA	NA	NA	NA	NA	NA	NA	NA	NA	NA	NA	NA	NA	NA	17.9619	-9.38676	NA	NA	NA	91.8901	NA	NA	NA	NA	NA	13.3295	NA	NA
TMA16_P1P2	26.6116	NA	46.9455	NA	NA	-10.9235	39.8505	NA	NA	NA	NA	49.0548	-10.176	-4.22234	NA	NA	NA	NA	NA	NA	NA	NA	NA	NA	NA	NA	NA	NA	NA	NA	NA	NA	NA	NA	NA	5.6678	NA	NA	NA	NA	NA	NA	NA	NA	NA	NA	NA	NA	NA
CEBPB_P1P2	2.98355	NA	NA	NA	NA	15.4234	NA	NA	NA	NA	NA	NA	NA	NA	NA	NA	NA	NA	NA	NA	NA	NA	NA	NA	NA	NA	NA	NA	NA	NA	NA	NA	NA	NA	NA	NA	NA	NA	NA	NA	NA	NA	NA	NA	NA	NA	NA	NA	NA
EXOSC8_P1P2	22.906	NA	46.8824	NA	NA	NA	18.9025	11.0287	NA	NA	NA	21.6207	NA	NA	NA	NA	NA	NA	NA	NA	NA	NA	NA	NA	NA	NA	NA	NA	NA	NA	NA	NA	NA	NA	NA	NA	NA	NA	NA	NA	32.526	NA	NA	NA	NA	NA	NA	NA	NA
TRAIP_P1P2	2.22911	NA	NA	NA	NA	NA	6.69372	30.1171	NA	NA	NA	NA	NA	NA	NA	NA	NA	NA	NA	NA	NA	NA	NA	NA	NA	NA	NA	NA	NA	NA	NA	NA	NA	NA	NA	3.4232	NA	NA	NA	NA	7.51438	NA	NA	NA	NA	NA	NA	-10.2249	NA
PSMA3_P1P2	42.0367	NA	71.64	22.9271	31.3819	NA	39.1867	44.7441	NA	NA	NA	60.9428	NA	NA	NA	NA	NA	NA	NA	NA	NA	NA	NA	NA	NA	NA	NA	NA	NA	NA	NA	NA	NA	61.8569	NA	31.7474	NA	NA	NA	NA	83.9782	NA	NA	NA	NA	NA	NA	NA	NA
RPL41_P1P2	1.85389	NA	6.43603	NA	-21.743	NA	1.92376	4.8114	NA	NA	NA	NA	2.89916	NA	NA	NA	NA	NA	NA	NA	NA	NA	NA	NA	NA	NA	NA	NA	NA	NA	NA	NA	NA	NA	NA	NA	NA	NA	NA	NA	NA	NA	NA	NA	NA	NA	3.21808	-2.48014	NA
EIF2B5_P1P2	45.7169	3.5432	62.4732	20.9208	6.28401	16.1682	34.3372	16.218	10.1723	2.57582	NA	51.0112	NA	NA	NA	NA	NA	NA	NA	NA	NA	NA	NA	NA	NA	NA	NA	NA	NA	NA	NA	NA	NA	5.84267	NA	8.03366	-5.63549	NA	NA	NA	33.8266	NA	NA	NA	NA	NA	NA	NA	NA
NAT8B_P1P2	2.5359	NA	NA	NA	NA	NA	NA	NA	NA	NA	NA	NA	NA	NA	NA	NA	NA	NA	NA	NA	NA	NA	NA	NA	NA	NA	NA	NA	NA	NA	NA	NA	NA	NA	NA	NA	NA	NA	NA	NA	NA	NA	1.95889	NA	NA	NA	NA	NA	NA
RBM22_P1P2	7.36827	NA	28.6724	NA	41.765	NA	10.6387	18.5928	NA	-6.38585	NA	51.1049	NA	NA	NA	NA	NA	NA	NA	NA	NA	NA	NA	NA	NA	NA	NA	NA	NA	NA	NA	NA	NA	NA	NA	17.1192	NA	NA	NA	NA	95.5095	NA	NA	NA	NA	NA	NA	NA	NA
MAT2A_P1P2	23.6276	NA	31.8119	-6.85002	NA	NA	14.2393	7.80727	NA	NA	NA	26.706	NA	NA	NA	NA	NA	NA	NA	NA	NA	NA	NA	NA	NA	NA	NA	NA	NA	NA	NA	NA	NA	10.9681	NA	NA	NA	NA	NA	NA	37.1723	NA	1.85462	NA	NA	NA	NA	NA	NA
SRPRB_P1P2	31.5478	NA	54.9072	NA	NA	NA	36.5422	NA	NA	NA	NA	59.6352	NA	-3.47899	NA	NA	NA	NA	NA	NA	NA	NA	NA	NA	NA	NA	NA	NA	NA	NA	NA	NA	NA	NA	NA	NA	NA	NA	NA	NA	NA	NA	NA	NA	NA	NA	NA	NA	NA
MTHFD2_P1	15.8531	-2.53751	26.0935	NA	-6.15305	-11.7766	24.0829	NA	NA	NA	NA	15.473	-11.6005	-29.1831	NA	NA	2.92579	NA	10.6575	-52.7027	-44.1407	-22.4818	-22.9331	-24.2656	-52.2051	-16.3807	17.0326	-79.5928	-83.051	-134.004	-66.3661	-47.6515	-58.4103	NA	NA	NA	NA	NA	NA	NA	NA	NA	NA	NA	NA	NA	NA	NA	NA
SMARCA5_P1P2	4.71909	-6.4089	NA	-8.54928	-21.1342	-5.88306	4.88359	NA	NA	NA	NA	NA	NA	NA	6.63416	-4.53078	NA	-9.46495	NA	NA	NA	NA	NA	NA	NA	NA	NA	NA	NA	NA	NA	NA	NA	NA	NA	NA	NA	NA	NA	NA	NA	NA	-1.79545	NA	NA	NA	NA	NA	NA
PSME3_P1P2	7.99057	NA	12.8277	2.46358	11.218	NA	5.78914	13.7226	NA	NA	NA	18.1241	NA	NA	NA	NA	NA	NA	NA	NA	NA	NA	NA	NA	NA	NA	NA	NA	NA	NA	NA	NA	NA	NA	NA	NA	NA	NA	NA	NA	NA	NA	NA	NA	NA	NA	NA	-2.71684	NA
RBFA_P1P2	11.6998	-8.27268	22.7403	NA	-4.74909	-18.3733	20.411	NA	NA	NA	NA	39.3148	-7.39855	-7.83644	NA	NA	NA	NA	NA	NA	NA	NA	NA	NA	NA	NA	NA	NA	NA	NA	NA	NA	NA	NA	NA	NA	NA	NA	NA	NA	NA	NA	NA	NA	NA	NA	-5.23047	-12.7244	NA
NFKB2_P1P2	2.18629	NA	NA	NA	NA	NA	NA	NA	NA	NA	NA	NA	NA	NA	NA	NA	NA	NA	NA	NA	NA	NA	NA	NA	NA	NA	NA	NA	NA	NA	NA	NA	NA	NA	-5.92152	NA	NA	NA	NA	NA	NA	NA	4.73808	NA	NA	NA	NA	NA	NA
FECH_P1P2	11.2879	NA	18.5074	NA	NA	NA	6.22928	NA	NA	NA	NA	17.7478	-4.7904	-8.45408	18.7329	NA	6.6242	NA	NA	NA	NA	NA	NA	NA	NA	NA	NA	NA	NA	NA	NA	NA	NA	NA	NA	NA	NA	NA	NA	NA	NA	NA	NA	NA	NA	-24.7607	NA	-5.27559	NA
TIMM44_P1P2	37.4485	NA	44.7929	NA	6.99263	NA	16.8112	NA	NA	NA	NA	48.9916	NA	NA	NA	NA	NA	NA	NA	NA	NA	NA	NA	NA	NA	NA	NA	NA	NA	NA	NA	NA	NA	8.58336	-7.83469	6.06726	-4.26665	NA	NA	NA	26.8212	NA	NA	NA	NA	NA	-4.37067	NA	NA
NUP98_P1P2	61.6682	NA	128.728	8.71771	NA	NA	31.3924	24.0231	NA	-11.2306	NA	60.9091	NA	NA	NA	NA	NA	NA	NA	NA	NA	NA	NA	NA	NA	NA	NA	NA	NA	NA	NA	NA	NA	7.17411	NA	7.1318	NA	NA	NA	NA	65.9946	NA	NA	NA	NA	NA	NA	NA	NA
DCAF16_P1P2	3.85987	NA	3.70813	NA	NA	NA	7.50107	NA	NA	NA	NA	NA	NA	NA	9.22366	NA	NA	NA	NA	NA	NA	NA	NA	NA	NA	NA	NA	NA	NA	NA	NA	NA	NA	NA	NA	NA	NA	NA	NA	NA	NA	NA	NA	NA	NA	NA	NA	NA	NA
NUP93_P1P2	65.5961	NA	102.659	NA	21.9885	NA	19.2962	38.5999	NA	-11.0816	NA	67.447	NA	NA	NA	NA	NA	NA	NA	NA	NA	NA	NA	NA	NA	NA	NA	NA	NA	NA	NA	NA	NA	39.4104	NA	8.01528	NA	NA	NA	NA	102.261	NA	NA	NA	NA	NA	NA	NA	NA
NUP133_P1P2	6.37579	NA	16.6446	NA	NA	NA	4.42285	NA	NA	NA	NA	20.1054	NA	NA	NA	NA	NA	NA	NA	NA	NA	NA	NA	NA	NA	NA	NA	NA	NA	NA	NA	NA	NA	5.91638	NA	3.75448	NA	NA	NA	NA	NA	NA	NA	NA	NA	NA	NA	NA	25.8256
TFB1M_P1P2	40.3442	-22.1647	50.317	NA	NA	-35.2738	48.611	6.24177	NA	4.31743	NA	74.4216	-20.5368	-32.403	NA	NA	NA	NA	NA	NA	NA	NA	NA	NA	NA	NA	NA	NA	NA	NA	NA	NA	NA	3.70155	-6.89008	NA	NA	NA	NA	NA	11.5713	NA	NA	NA	NA	NA	-8.86847	-7.16275	NA
RFK_P1P2	4.5259	NA	7.94633	NA	NA	NA	19.8717	NA	NA	14.8507	NA	15.1103	-3.11516	-7.30781	NA	NA	NA	NA	NA	NA	NA	NA	NA	NA	NA	NA	NA	NA	NA	NA	NA	NA	NA	NA	NA	NA	NA	NA	NA	NA	NA	NA	NA	NA	NA	NA	2.22033	NA	NA
FANCB_P1P2	4.68098	NA	14.8446	14.1757	NA	-5.4215	11.1718	NA	NA	-2.14797	NA	NA	NA	NA	5.43197	NA	NA	NA	NA	NA	NA	NA	NA	NA	NA	NA	NA	NA	NA	NA	NA	NA	NA	NA	NA	NA	NA	NA	NA	NA	NA	NA	NA	NA	NA	NA	NA	NA	NA
N6AMT1_P1P2	12.8408	NA	33.8827	NA	NA	NA	14.2867	NA	NA	NA	NA	45.5729	-36.2444	-3.05985	NA	NA	NA	NA	NA	NA	NA	NA	NA	NA	NA	NA	NA	NA	NA	NA	NA	NA	NA	NA	NA	NA	-2.16777	NA	NA	NA	8.13285	NA	NA	NA	NA	NA	NA	NA	NA
DYNLRB1_P1	57.324	NA	112.867	7.34981	17.6711	NA	46.7744	11.4501	NA	-8.33752	NA	106.555	NA	-5.24023	NA	NA	NA	NA	NA	NA	NA	NA	NA	NA	NA	NA	NA	NA	NA	NA	NA	NA	NA	NA	NA	NA	NA	NA	NA	NA	52.9396	NA	NA	NA	NA	NA	NA	NA	NA
PAF1_P1P2	61.2698	NA	96.5797	NA	NA	NA	78.7715	NA	NA	-6.39193	NA	88.0135	NA	NA	NA	NA	NA	NA	NA	NA	NA	NA	NA	NA	NA	NA	NA	NA	NA	NA	NA	NA	NA	15.4181	-15.1732	7.67644	NA	NA	NA	NA	116.007	NA	1.44754	NA	NA	NA	-1.16664	NA	NA
GTF2H5_P1P2	11.463	NA	11.3615	NA	NA	NA	7.18225	NA	NA	NA	NA	17.9917	NA	NA	NA	NA	NA	NA	11.0703	-48.705	-48.2407	-31.0048	-9.40459	-20.9779	-31.2473	-23.5456	19.1965	-41.164	-60.0161	-63.1945	-46.103	-26.5798	-52.9091	NA	NA	NA	NA	NA	NA	NA	NA	NA	NA	NA	NA	NA	NA	NA	NA
MED18_P1P2	31.3297	NA	52.7683	13.5126	NA	NA	31.1665	10.1463	3.90318	19.7789	NA	59.632	NA	-8.51926	NA	NA	NA	NA	NA	NA	NA	NA	NA	NA	NA	NA	NA	NA	NA	NA	NA	NA	NA	50.1375	-36.4168	6.56985	-9.00524	NA	NA	NA	13.5363	NA	NA	NA	NA	NA	NA	NA	NA
EIF2B4_P1P2	41.4085	7.51916	79.0401	10.7435	NA	9.7638	31.6372	NA	8.15537	3.58637	NA	67.9141	NA	-4.83682	NA	NA	NA	NA	NA	NA	NA	NA	NA	NA	NA	NA	NA	NA	NA	NA	NA	NA	NA	NA	5.94271	8.10848	-5.394	NA	NA	NA	74.4113	NA	2.75244	NA	NA	NA	NA	-10.8937	NA
MLST8_P1P2	12.4581	NA	9.06715	NA	NA	12.4763	NA	-6.27999	NA	NA	NA	13.0442	10.0072	-6.95603	NA	NA	NA	NA	NA	NA	NA	NA	NA	NA	NA	NA	NA	NA	NA	NA	NA	NA	NA	NA	NA	NA	NA	NA	NA	NA	NA	NA	NA	NA	NA	NA	NA	-5.05401	NA
PABPN1_P1P2	28.0475	NA	37.7156	NA	NA	NA	33.1781	NA	NA	NA	NA	52.1435	NA	-25.0351	NA	NA	NA	NA	NA	NA	NA	NA	NA	NA	NA	NA	NA	NA	NA	NA	NA	NA	NA	NA	NA	4.86994	-2.12814	NA	NA	NA	NA	NA	NA	NA	NA	NA	NA	NA	NA
INO80B_P1P2	12.0249	NA	19.4658	17.7568	NA	-3.83009	14.8379	NA	NA	9.81863	NA	22.1818	-31.4316	NA	NA	NA	NA	NA	9.91098	-41.6659	-34.4937	NA	NA	-13.6724	-22.4156	-17.5638	22.1593	-25.7905	-25.9971	-53.7858	NA	NA	-31.2242	3.11978	NA	6.32692	NA	NA	NA	NA	42.5351	NA	NA	NA	NA	NA	NA	NA	NA
DHX36_P1P2	5.43095	NA	16.4897	NA	NA	4.11631	26.4666	NA	NA	NA	NA	43.3704	-4.56935	-2.68478	NA	NA	7.87478	NA	NA	NA	NA	NA	NA	NA	NA	NA	NA	NA	NA	NA	NA	NA	NA	NA	NA	NA	NA	NA	NA	NA	24.4132	-10.5505	8.9497	NA	NA	NA	NA	NA	NA
MED28_P1P2	23.7493	NA	26.0672	NA	NA	1.68702	10.2495	NA	NA	3.15577	NA	71.7051	NA	-4.18503	NA	NA	NA	NA	13.0785	-48.7691	-39.8593	-18.9185	-29.3335	-30.0669	-66.4388	-49.1791	35.7691	-28.2522	-56.7488	-52.9064	-59.1317	-32.1257	-43.925	18.631	-14.1811	5.05166	NA	NA	NA	NA	39.5967	NA	NA	NA	NA	NA	NA	NA	NA
CBLL1_P1P2	5.42483	NA	6.66092	15.0735	NA	NA	NA	NA	NA	NA	NA	NA	21.8676	NA	NA	15.2343	NA	2.17037	NA	NA	NA	NA	NA	NA	NA	NA	NA	NA	NA	NA	NA	NA	NA	7.58597	-18.1601	NA	NA	NA	NA	NA	NA	9.39124	NA	NA	NA	NA	10.9844	12.6501	NA
EIF4A1_P1P2	5.74061	NA	30.6949	NA	39.1232	NA	25.6533	NA	NA	NA	NA	16.5865	NA	-8.07401	NA	NA	NA	NA	NA	NA	NA	NA	NA	NA	NA	NA	NA	NA	NA	NA	NA	NA	NA	NA	NA	7.77008	-5.85069	NA	NA	NA	NA	NA	NA	NA	NA	NA	NA	NA	NA
NUBPL_P1P2	3.37346	NA	11.9525	NA	NA	-2.67212	8.77975	NA	NA	NA	NA	15.3822	NA	-6.81166	NA	NA	5.77262	NA	NA	NA	NA	NA	NA	NA	NA	NA	NA	NA	NA	NA	NA	NA	NA	NA	NA	NA	NA	NA	NA	NA	NA	NA	NA	NA	NA	NA	-3.27731	NA	NA
TFG_P1P2	6.29756	NA	11.3217	NA	NA	-17.2095	NA	-4.522	NA	NA	NA	9.0137	NA	-2.20317	NA	NA	NA	NA	NA	NA	NA	NA	NA	NA	NA	NA	NA	NA	NA	NA	NA	NA	NA	NA	NA	NA	NA	NA	NA	NA	3.77021	NA	NA	NA	NA	NA	NA	NA	NA
PDE12_P1P2	8.16559	-10.012	14.6128	5.5419	NA	-8.79367	23.5064	NA	NA	NA	NA	12.837	-12.7574	NA	41.1331	-15.9086	21.9113	NA	NA	NA	NA	NA	NA	NA	NA	NA	NA	NA	NA	NA	NA	NA	NA	NA	NA	NA	NA	NA	NA	NA	NA	NA	NA	NA	NA	NA	-2.46035	NA	NA
SMC3_P1P2	39.3884	NA	44.188	NA	21.52	41.7936	20.6467	39.6267	NA	-8.90477	NA	61.4055	NA	NA	NA	NA	NA	NA	NA	NA	NA	NA	NA	NA	NA	NA	NA	NA	NA	NA	NA	NA	NA	30.269	-11.6473	6.40716	NA	NA	NA	NA	NA	7.37379	NA	NA	NA	NA	NA	NA	NA
NDUFB11_P1P2	6.60374	-4.12138	6.71134	NA	-5.98104	NA	23.2031	NA	-1.67297	-4.26468	NA	9.6523	NA	-3.15529	NA	NA	NA	NA	NA	NA	NA	NA	NA	NA	NA	NA	NA	NA	NA	NA	NA	NA	NA	NA	NA	NA	NA	NA	NA	NA	NA	NA	NA	NA	NA	NA	-3.20481	NA	NA
CHORDC1_P1P2	17.3815	-13.0679	21.1502	NA	-5.22578	-18.8243	30.7395	16.6189	NA	NA	NA	15.8499	NA	-8.26971	25.8198	NA	12.84	NA	NA	NA	NA	NA	NA	NA	NA	NA	NA	NA	NA	NA	NA	NA	NA	NA	NA	NA	NA	NA	NA	NA	NA	NA	NA	NA	NA	NA	4.74115	5.76219	NA
MRPS17_P1P2	52.1085	-28.1311	69.6216	NA	NA	-34.252	62.5115	NA	NA	15.8339	NA	80.0308	NA	-14.4445	NA	NA	NA	NA	37.2259	-80.8901	-59.4523	-10.37	-15.1506	-30.5855	-88.1111	-63.2754	40.0525	-52.1879	-78.9929	-75.7623	-75.1532	-54.7874	-50.8522	7.52459	-12.1807	NA	-4.30434	NA	NA	NA	20.5927	NA	3.42582	NA	NA	NA	-8.0042	-20.6526	NA
CCT3_P1P2	53.0662	NA	83.4142	8.15178	10.2686	NA	46.8528	10.1367	NA	NA	NA	79.2349	-6.81215	NA	NA	NA	NA	NA	NA	NA	NA	NA	NA	NA	NA	NA	NA	NA	NA	NA	NA	NA	NA	NA	NA	8.17185	-2.95747	NA	NA	NA	36.1973	NA	NA	NA	NA	NA	NA	NA	NA
PTBP1_P1P2	5.96154	NA	39.1352	34.7682	NA	-22.3263	22.227	NA	NA	NA	NA	60.4224	NA	-9.88606	7.56754	NA	NA	NA	11.0707	-46.8144	NA	-16.7401	-5.28673	-6.59835	1.66108	NA	31.4537	-17.7972	NA	-46.4181	-26.3724	-43.6695	-37.1591	NA	NA	2.06048	NA	NA	NA	NA	42.7251	-7.01525	NA	NA	NA	NA	NA	NA	NA
SNRPD2_P1P2	18.4096	NA	127.212	NA	NA	NA	15.7306	NA	NA	-2.8605	NA	85.5116	NA	-14.9144	NA	NA	NA	NA	NA	NA	NA	NA	NA	NA	NA	NA	NA	NA	NA	NA	NA	NA	NA	27.4059	-7.85253	4.95334	NA	NA	NA	NA	17.1093	NA	NA	NA	NA	NA	NA	NA	NA
SUPT6H_P1P2	47.931	NA	112.59	NA	-11.3234	NA	43.5363	NA	NA	16.764	NA	91.1164	NA	-4.41271	NA	NA	NA	NA	44.3945	-49.3024	-44.1231	NA	NA	-13.7674	-24.3043	-34.9933	41.4265	NA	-51.6939	-78.4277	-53.6611	NA	-61.3239	NA	NA	3.67012	-12.0463	NA	NA	NA	17.4571	NA	14.179	NA	NA	NA	NA	NA	NA
RPL38_P1P2	43.6786	NA	99.6347	NA	NA	-7.17251	51.9834	4.71531	NA	NA	NA	68.6033	NA	-6.70628	NA	NA	NA	NA	NA	NA	NA	NA	NA	NA	NA	NA	NA	NA	NA	NA	NA	NA	NA	NA	NA	18.2737	NA	NA	NA	NA	30.0787	NA	NA	NA	NA	NA	NA	NA	NA
CPSF7_P1P2	3.60992	NA	NA	NA	NA	NA	NA	NA	NA	NA	NA	NA	NA	NA	NA	NA	NA	NA	NA	NA	NA	NA	NA	NA	NA	NA	NA	NA	NA	NA	NA	NA	NA	NA	NA	NA	NA	NA	NA	NA	NA	NA	NA	NA	NA	NA	NA	NA	NA
METTL14_P1P2	4.08773	NA	NA	NA	NA	NA	2.9893	NA	NA	NA	NA	NA	NA	NA	NA	NA	NA	NA	NA	NA	NA	NA	NA	NA	NA	NA	NA	NA	NA	NA	NA	NA	NA	NA	NA	NA	NA	NA	NA	NA	NA	NA	NA	NA	NA	NA	NA	NA	38.3281
MALSU1_P1P2	17.5295	-10.1134	31.5749	3.58156	NA	-12.9489	18.2426	NA	NA	NA	NA	50.297	-4.4748	-9.76997	NA	NA	NA	NA	NA	NA	NA	NA	NA	NA	NA	NA	NA	NA	NA	NA	NA	NA	NA	NA	NA	NA	NA	NA	NA	NA	NA	NA	NA	NA	NA	NA	-7.55973	-14.325	NA
MLANA_P2	3.48905	NA	NA	NA	NA	NA	NA	NA	NA	NA	NA	NA	NA	NA	NA	NA	NA	NA	NA	NA	NA	NA	NA	NA	NA	NA	NA	NA	NA	NA	NA	NA	NA	NA	NA	NA	NA	NA	NA	NA	NA	NA	NA	NA	NA	NA	NA	NA	NA
GFM1_P1P2	46.726	NA	62.7937	NA	8.9228	-24.4238	45.896	NA	NA	6.193	NA	64.1982	NA	-10.5403	9.78541	NA	7.17294	NA	NA	NA	NA	NA	NA	NA	NA	NA	NA	NA	NA	NA	NA	NA	NA	NA	NA	NA	-2.6955	NA	NA	NA	NA	NA	NA	NA	NA	NA	-8.3556	-9.30041	NA
MCM5_P1P2	24.5714	NA	34.9092	NA	-12.5391	-4.16491	33.3162	-20.6892	NA	NA	NA	22.3747	-7.43538	NA	11.422	NA	5.2715	NA	NA	NA	NA	NA	NA	NA	NA	NA	NA	NA	NA	NA	NA	NA	NA	NA	NA	7.08354	NA	NA	NA	NA	24.5377	NA	NA	NA	NA	NA	NA	NA	NA
ALDH7A1_P1P2	2.14056	NA	NA	NA	NA	NA	NA	NA	NA	NA	NA	NA	NA	NA	NA	NA	NA	NA	NA	NA	NA	NA	NA	NA	NA	NA	NA	NA	NA	NA	NA	NA	NA	NA	NA	NA	NA	NA	NA	NA	NA	NA	NA	NA	NA	NA	NA	NA	NA
POLR2H_P1P2	65.7559	NA	126.723	NA	11.0522	NA	48.9291	26.0955	18.6004	NA	NA	101.271	NA	NA	NA	NA	NA	NA	NA	NA	NA	NA	NA	NA	NA	NA	NA	NA	NA	NA	NA	NA	NA	83.7379	-21.4981	14.7679	-11.9047	NA	NA	NA	94.6008	NA	NA	NA	NA	NA	NA	NA	NA
EIF4A3_P1P2	18.4579	NA	34.1566	NA	29.8634	11.438	24.7001	22.2133	NA	NA	NA	29.244	NA	NA	NA	NA	NA	NA	NA	NA	NA	NA	NA	NA	NA	NA	NA	NA	NA	NA	NA	NA	NA	NA	NA	6.94975	NA	NA	NA	NA	NA	NA	NA	NA	NA	NA	NA	NA	NA
SKA2_P1P2	8.34117	NA	23.556	NA	50.5147	NA	11.4264	32.5932	NA	NA	NA	11.6533	NA	-2.64809	NA	NA	NA	NA	NA	NA	NA	NA	NA	NA	NA	NA	NA	NA	NA	NA	NA	NA	NA	NA	NA	NA	NA	NA	NA	NA	5.04037	NA	NA	NA	NA	NA	NA	NA	NA
GPATCH1_P1P2	7.99467	NA	5.8169	NA	NA	NA	16.1253	NA	NA	NA	NA	7.87895	NA	-3.64487	NA	NA	NA	NA	NA	NA	NA	NA	NA	NA	NA	NA	NA	NA	NA	NA	NA	NA	NA	NA	NA	NA	NA	NA	NA	NA	NA	NA	NA	NA	NA	NA	NA	NA	NA
SRP9_P1P2	7.56016	-0.521395	17.063	NA	8.94676	-2.30484	6.9484	-10.2686	NA	NA	NA	18.7643	NA	-8.60163	4.36421	NA	NA	NA	NA	NA	NA	NA	NA	NA	NA	NA	NA	NA	NA	NA	NA	NA	NA	NA	NA	NA	NA	NA	NA	NA	NA	NA	NA	NA	NA	NA	NA	NA	NA
CDCA5_P1P2	3.63651	NA	13.8384	NA	NA	NA	NA	51.5717	NA	NA	NA	21.9741	NA	27.0022	NA	NA	NA	NA	NA	NA	NA	NA	NA	NA	NA	NA	NA	NA	NA	NA	NA	NA	NA	NA	NA	NA	NA	NA	NA	NA	12.4401	NA	NA	NA	NA	NA	NA	NA	NA
CENPH_P1P2	4.94169	NA	15.9523	NA	NA	NA	NA	5.52963	NA	NA	NA	17.205	NA	-7.40192	NA	NA	NA	NA	NA	NA	NA	NA	NA	NA	NA	NA	NA	NA	NA	NA	NA	NA	NA	NA	NA	NA	NA	NA	NA	NA	NA	NA	NA	NA	NA	NA	NA	NA	NA
RHCG_P1P2	2.1475	NA	NA	NA	NA	NA	NA	NA	NA	NA	NA	NA	NA	NA	NA	NA	NA	NA	NA	NA	NA	NA	NA	NA	NA	NA	NA	NA	NA	NA	NA	NA	NA	NA	NA	NA	NA	NA	NA	NA	NA	NA	1.98372	NA	NA	NA	NA	NA	NA
CCDC115_P1P2	4.55154	NA	NA	NA	NA	NA	6.09446	NA	NA	NA	NA	NA	NA	NA	NA	NA	NA	NA	NA	NA	NA	NA	NA	NA	NA	NA	NA	NA	NA	NA	NA	NA	NA	NA	NA	NA	NA	NA	NA	NA	NA	NA	NA	NA	NA	NA	NA	NA	NA
RDH5_P1P2	1.66771	NA	NA	NA	NA	NA	NA	NA	NA	NA	NA	NA	NA	NA	NA	NA	NA	NA	NA	NA	NA	NA	NA	NA	NA	NA	NA	NA	NA	NA	NA	NA	NA	NA	NA	NA	NA	NA	NA	NA	NA	NA	NA	NA	NA	NA	NA	NA	NA
CEBPZ_P1P2	42.8247	NA	68.1884	NA	-17.9032	-9.83845	36.1499	14.8165	NA	NA	NA	72.6763	-8.20936	NA	NA	NA	NA	NA	NA	NA	NA	NA	NA	NA	NA	NA	NA	NA	NA	NA	NA	NA	NA	NA	NA	3.73797	NA	NA	NA	NA	9.5969	NA	NA	NA	NA	NA	NA	NA	NA
MTMR11_P1P2	2.39668	NA	NA	NA	NA	NA	NA	NA	NA	NA	NA	NA	NA	NA	NA	NA	NA	NA	NA	NA	NA	NA	NA	NA	NA	NA	NA	NA	NA	NA	NA	NA	NA	NA	NA	NA	NA	NA	NA	NA	NA	NA	NA	NA	NA	NA	NA	NA	NA
ZFPM1_P1P2	5.737	NA	12.9745	NA	NA	NA	11.2204	-9.90072	NA	NA	NA	12.9277	NA	NA	NA	NA	NA	NA	NA	NA	NA	NA	NA	NA	NA	NA	NA	NA	NA	NA	NA	NA	NA	NA	NA	NA	NA	NA	NA	NA	NA	NA	NA	NA	NA	NA	NA	NA	NA
GJB4_P1P2	2.80252	NA	NA	NA	NA	NA	NA	NA	NA	NA	NA	NA	NA	NA	NA	NA	NA	NA	NA	NA	NA	NA	NA	NA	NA	NA	NA	NA	NA	NA	NA	NA	NA	NA	NA	NA	NA	NA	NA	NA	NA	NA	NA	NA	NA	NA	NA	NA	NA
CLIP2_P1P2	9.4952	NA	NA	NA	NA	NA	NA	NA	NA	NA	NA	NA	NA	NA	NA	NA	NA	NA	NA	NA	NA	NA	NA	NA	NA	NA	NA	NA	NA	NA	NA	NA	NA	NA	NA	NA	NA	NA	NA	NA	NA	NA	NA	NA	NA	NA	NA	NA	NA
WDTC1_P1P2	5.89954	NA	8.30751	NA	NA	NA	NA	NA	NA	NA	NA	17.0569	NA	NA	NA	NA	17.0213	NA	NA	NA	NA	NA	NA	NA	NA	NA	NA	NA	NA	NA	NA	NA	NA	NA	NA	NA	NA	NA	NA	NA	NA	NA	NA	NA	NA	NA	NA	NA	NA
MAFG_P1P2	1.97106	NA	NA	NA	NA	NA	NA	NA	NA	NA	NA	NA	NA	NA	NA	NA	NA	NA	NA	NA	NA	NA	NA	NA	NA	NA	NA	NA	NA	NA	NA	NA	NA	NA	NA	NA	NA	NA	NA	NA	NA	NA	NA	NA	NA	NA	NA	NA	NA
SEH1L_P1P2	41.3324	NA	70.125	NA	NA	NA	43.3526	NA	NA	NA	NA	66.1122	NA	-14.7804	NA	NA	NA	NA	42.7641	-102.62	-65.9134	-59.0616	-35.4602	-49.2341	-121.478	-88.2953	43.6983	-103.728	-102.122	-168.183	-93.4038	-80.2873	-138.453	NA	NA	7.61445	NA	NA	NA	NA	NA	NA	NA	NA	NA	NA	NA	NA	NA
POLG_P1P2	25.5084	-16.4732	20.4973	NA	NA	-29.4339	21.7492	NA	NA	NA	NA	37.5826	-14.9375	-21.6217	NA	NA	NA	NA	NA	NA	NA	NA	NA	NA	NA	NA	NA	NA	NA	NA	NA	NA	NA	NA	NA	NA	NA	NA	NA	NA	NA	NA	NA	NA	NA	NA	NA	NA	-3.56671
KIF14_P1P2	11.5225	NA	33.5786	NA	19.7298	-12.4335	14.4646	NA	NA	NA	NA	20.2271	-7.55906	NA	NA	NA	NA	NA	NA	NA	NA	NA	NA	NA	NA	NA	NA	NA	NA	NA	NA	NA	NA	NA	NA	NA	NA	NA	NA	NA	NA	NA	NA	NA	NA	NA	NA	NA	NA
WDR36_P1P2	26.2211	NA	51.2299	NA	-11.6127	-4.15866	44.9354	19.6495	NA	NA	NA	52.7739	NA	-3.29874	NA	NA	NA	NA	NA	NA	NA	NA	NA	NA	NA	NA	NA	NA	NA	NA	NA	NA	NA	NA	NA	7.59284	-2.94127	NA	NA	NA	67.6091	NA	NA	NA	NA	NA	NA	NA	NA
RNASEH2C_P1P2	5.80416	NA	12.6742	NA	NA	-5.57584	33.895	NA	NA	NA	NA	18.5801	-3.8307	-6.50115	33.5584	NA	NA	NA	12.5029	-12.2084	-17.6376	NA	NA	NA	-8.47435	-10.6498	24.977	-16.2059	-39.6347	NA	-24.6306	-17.9959	NA	NA	NA	NA	NA	NA	NA	NA	NA	NA	NA	NA	NA	NA	NA	NA	NA
DCAF13_P1P2	21.4355	NA	50.7298	NA	NA	-2.74889	19.5741	NA	NA	NA	NA	62.6674	NA	-7.93951	NA	NA	NA	NA	NA	NA	NA	NA	NA	NA	NA	NA	NA	NA	NA	NA	NA	NA	NA	NA	NA	NA	NA	NA	NA	NA	11.6744	NA	NA	NA	NA	NA	NA	NA	NA
C16orf80_P1P2	5.06025	-13.0342	6.56674	-6.27066	NA	-25.7672	NA	NA	NA	NA	NA	3.71223	-18.0357	NA	NA	5.13709	NA	NA	NA	NA	NA	NA	NA	NA	NA	NA	NA	NA	NA	NA	NA	NA	NA	NA	NA	NA	NA	NA	NA	NA	7.2246	NA	NA	NA	NA	NA	NA	NA	NA
NINJ2_P1	2.02819	NA	NA	NA	NA	NA	3.94274	NA	NA	NA	NA	NA	NA	NA	NA	NA	NA	NA	NA	NA	NA	NA	NA	NA	NA	NA	NA	NA	NA	NA	NA	NA	NA	NA	NA	NA	NA	NA	NA	NA	NA	NA	NA	NA	NA	NA	NA	NA	NA
IGF1_P1P2	2.65459	NA	NA	NA	NA	NA	NA	NA	NA	NA	NA	NA	NA	NA	NA	NA	NA	NA	NA	NA	NA	NA	NA	NA	NA	NA	NA	NA	NA	NA	NA	NA	NA	NA	NA	NA	NA	NA	NA	NA	NA	NA	-1.75129	NA	NA	NA	NA	NA	NA
POP4_P1P2	11.1699	NA	28.8417	NA	-8.15515	NA	17.0997	13.3773	NA	NA	NA	56.8241	-3.58849	NA	NA	NA	NA	NA	NA	NA	NA	NA	NA	NA	NA	NA	NA	NA	NA	NA	NA	NA	NA	NA	NA	NA	NA	NA	NA	NA	NA	NA	NA	NA	NA	NA	NA	NA	NA
MRPS5_P1P2	32.4649	-5.77759	62.9353	NA	NA	-32.4739	56.8219	NA	NA	11.1309	NA	71.1248	NA	-8.88904	NA	NA	NA	NA	42.1658	-74.5628	-52.6376	-20.4384	-20.8055	-32.4301	-84.7339	-54.6302	40.7006	-34.9411	-70.9049	-58.6378	-68.205	-42.4029	-36.5036	NA	NA	NA	-5.42518	NA	NA	NA	17.1196	NA	NA	NA	NA	NA	-3.66405	-22.168	NA
RRP1_P1P2	8.00086	NA	11.6052	NA	-36.6289	NA	NA	NA	NA	NA	NA	NA	NA	NA	NA	NA	NA	NA	NA	NA	NA	NA	NA	NA	NA	NA	NA	NA	NA	NA	NA	NA	NA	NA	NA	NA	NA	NA	NA	NA	8.3495	NA	NA	NA	NA	NA	NA	NA	NA
NDUFAF7_P1P2	15.2974	NA	25.9644	NA	NA	-5.00042	15.7757	NA	NA	NA	NA	14.7781	-4.45511	NA	NA	NA	NA	NA	NA	NA	NA	NA	NA	NA	NA	NA	NA	NA	NA	NA	NA	NA	NA	NA	NA	NA	NA	NA	NA	NA	NA	NA	NA	NA	NA	NA	NA	NA	NA
ZNF787_P1P2	5.96369	NA	NA	NA	7.31211	NA	8.87762	NA	NA	NA	NA	11.9135	-3.07455	-1.61538	NA	NA	NA	NA	NA	NA	NA	NA	NA	NA	NA	NA	NA	NA	NA	NA	NA	NA	NA	NA	NA	NA	NA	NA	NA	NA	1.75192	NA	NA	NA	NA	NA	NA	NA	NA
TERF2_P1P2	7.0466	NA	15.7552	NA	NA	NA	11.957	NA	NA	NA	NA	24.8833	NA	-1.16855	NA	NA	NA	NA	NA	NA	NA	NA	NA	NA	NA	NA	NA	NA	NA	NA	NA	NA	NA	NA	NA	8.8074	NA	NA	NA	NA	NA	NA	NA	NA	NA	NA	NA	NA	NA
DSC2_P1P2	2.95361	NA	NA	NA	NA	NA	NA	NA	NA	NA	NA	NA	NA	NA	NA	NA	NA	NA	NA	NA	NA	NA	NA	NA	NA	NA	NA	NA	NA	NA	NA	NA	NA	NA	NA	NA	NA	NA	NA	NA	NA	NA	NA	NA	NA	NA	NA	NA	NA
MRPL46_P1P2	43.701	-19.0595	56.2215	NA	NA	-38.3309	46.1581	3.0399	NA	3.91854	NA	63.9685	NA	-14.5255	NA	NA	NA	NA	36.345	-60.5016	-39.8428	-12.8159	-13.9186	-28.8488	-71.9228	-50.0497	36.3279	-41.3308	-50.8148	-54.9464	-59.5628	-35.6427	-41.8627	NA	NA	NA	NA	NA	NA	NA	NA	NA	NA	NA	NA	NA	NA	NA	-10.3789
MRPL32_P1P2	30.6657	NA	41.675	NA	NA	-20.5123	33.1186	NA	NA	3.03075	NA	61.9663	NA	-15.1534	NA	NA	NA	NA	24.7022	-78.4813	-41.6649	-6.69139	-5.84634	-35.0923	-85.54	-46.942	31.0151	-33.6383	-53.1033	-68.5689	-57.0798	-40.1819	-51.9607	9.64559	NA	NA	NA	NA	NA	NA	NA	NA	NA	NA	NA	NA	-8.65771	-18.9914	NA
DCTN1_P1P2	28.6545	NA	37.9419	NA	NA	-2.7136	46.9673	NA	NA	NA	NA	61.7104	-7.73101	-35.5925	NA	NA	NA	NA	NA	NA	NA	NA	NA	NA	NA	NA	NA	NA	NA	NA	NA	NA	NA	NA	NA	NA	NA	NA	NA	NA	7.14686	NA	NA	NA	NA	NA	NA	NA	NA
PSEN1_P1P2	1.712	NA	NA	NA	NA	NA	NA	NA	NA	NA	NA	NA	NA	NA	NA	NA	NA	NA	NA	NA	NA	NA	NA	NA	NA	NA	NA	NA	NA	NA	NA	NA	NA	NA	NA	NA	NA	NA	NA	NA	NA	NA	-26.5203	NA	NA	NA	NA	NA	NA
POLD1_P1P2	13.6136	NA	36.649	4.15517	NA	NA	18.6478	NA	NA	-8.84669	NA	25.6964	-2.94133	-8.60317	NA	NA	NA	NA	NA	NA	NA	NA	NA	NA	NA	NA	NA	NA	NA	NA	NA	NA	NA	4.71569	NA	14.1638	-9.01838	NA	NA	NA	14.0832	NA	-2.09169	NA	NA	NA	NA	NA	NA
NUP107_P1P2	36.0447	NA	59.368	NA	NA	NA	19.9766	NA	NA	NA	NA	63.1334	NA	-3.00244	NA	NA	NA	NA	NA	NA	NA	NA	NA	NA	NA	NA	NA	NA	NA	NA	NA	NA	NA	17.5792	NA	7.51098	NA	NA	NA	NA	27.9644	NA	NA	NA	NA	NA	-2.02517	NA	NA
TTC4_P1P2	28.6532	NA	45.3973	NA	NA	NA	28.5057	NA	NA	NA	NA	69.5483	NA	NA	NA	NA	NA	NA	NA	NA	NA	NA	NA	NA	NA	NA	NA	NA	NA	NA	NA	NA	NA	NA	NA	NA	NA	NA	NA	NA	25.0477	NA	NA	NA	NA	NA	11.7684	NA	NA
KIAA0947_P1P2	6.19998	NA	27.694	NA	NA	-7.77859	19.4386	NA	NA	NA	NA	48.6977	NA	NA	NA	NA	NA	NA	NA	NA	NA	NA	NA	NA	NA	NA	NA	NA	NA	NA	NA	NA	NA	NA	NA	NA	NA	NA	NA	NA	NA	NA	NA	NA	NA	NA	-5.25913	-9.4632	NA
C2orf15_P1P2	18.7026	-5.53122	27.7025	NA	NA	-21.0278	26.5261	NA	NA	7.67233	NA	38.1411	NA	NA	NA	NA	NA	NA	NA	NA	NA	NA	NA	NA	NA	NA	NA	NA	NA	NA	NA	NA	NA	3.97833	-3.43377	3.41485	-2.9008	NA	NA	NA	NA	NA	NA	NA	NA	NA	NA	NA	NA
LMBR1L_P1P2	6.56142	NA	9.45135	NA	NA	NA	NA	NA	NA	NA	NA	8.97022	NA	NA	NA	NA	NA	NA	NA	NA	NA	NA	NA	NA	NA	NA	NA	NA	NA	NA	NA	NA	NA	NA	NA	NA	NA	NA	NA	NA	NA	NA	NA	NA	NA	NA	NA	NA	NA
MYBBP1A_P1P2	60.8501	NA	89.5146	NA	NA	NA	44.8772	29.2723	NA	3.82058	NA	85.6966	NA	-8.08514	NA	NA	NA	NA	NA	NA	NA	NA	NA	NA	NA	NA	NA	NA	NA	NA	NA	NA	NA	NA	NA	7.63595	NA	NA	NA	NA	56.1081	-6.46958	NA	NA	NA	NA	NA	NA	NA
SNRNP200_P1P2	26.9635	NA	81.5666	NA	NA	NA	44.8352	NA	NA	NA	NA	92.7245	NA	-22.1972	NA	NA	NA	NA	NA	NA	NA	NA	NA	NA	NA	NA	NA	NA	NA	NA	NA	NA	NA	NA	NA	8.17312	NA	NA	NA	NA	56.6931	NA	NA	NA	NA	NA	NA	NA	NA
RPL36_P1P2	30.1135	NA	79.2877	NA	NA	NA	44.2647	17.3196	NA	NA	NA	79.6465	NA	NA	NA	NA	NA	NA	NA	NA	NA	NA	NA	NA	NA	NA	NA	NA	NA	NA	NA	NA	NA	9.9738	NA	11.6191	-2.66061	NA	NA	NA	25.708	NA	NA	NA	NA	NA	NA	NA	NA
TBRG4_P1P2	12.2524	NA	29.1868	NA	NA	NA	NA	NA	NA	NA	NA	22.6708	NA	NA	NA	NA	NA	NA	NA	NA	NA	NA	NA	NA	NA	NA	NA	NA	NA	NA	NA	NA	NA	NA	NA	NA	NA	NA	NA	NA	7.94399	NA	NA	NA	NA	NA	NA	NA	NA
STIL_P1P2	23.9653	NA	15.7007	NA	NA	NA	18.9415	NA	NA	NA	NA	33.8449	-2.88768	-21.4291	NA	NA	NA	NA	NA	NA	NA	NA	NA	NA	NA	NA	NA	NA	NA	NA	NA	NA	NA	NA	NA	NA	NA	NA	NA	NA	2.714	NA	NA	NA	NA	NA	NA	NA	NA
SORT1_P1P2	10.615	NA	10.5129	NA	NA	NA	13.698	NA	NA	NA	NA	NA	NA	NA	NA	NA	NA	NA	NA	NA	NA	NA	NA	NA	NA	NA	NA	NA	NA	NA	NA	NA	NA	NA	NA	NA	NA	7.27651	NA	NA	NA	NA	NA	NA	NA	NA	NA	NA	NA
EPG5_P1P2	7.55825	-8.72383	4.41612	NA	NA	-11.4374	NA	2.97139	NA	NA	NA	NA	-14.783	NA	NA	NA	NA	NA	NA	NA	NA	NA	NA	NA	NA	NA	NA	NA	NA	NA	NA	NA	NA	NA	NA	NA	NA	NA	NA	NA	NA	NA	NA	NA	NA	NA	NA	NA	NA
LSG1_P1P2	8.94415	NA	28.298	NA	NA	NA	20.7055	NA	NA	NA	NA	71.5146	NA	-7.54294	NA	NA	NA	NA	NA	NA	NA	NA	NA	NA	NA	NA	NA	NA	NA	NA	NA	NA	NA	NA	NA	NA	NA	NA	NA	NA	7.66644	NA	NA	NA	NA	NA	NA	NA	NA
SNRNP27_P1P2	27.763	NA	42.6883	4.31731	53.5245	-2.09109	48.9619	7.74304	NA	9.2895	NA	55.3205	-20.3151	7.99231	NA	NA	NA	NA	NA	NA	NA	NA	NA	NA	NA	NA	NA	NA	NA	NA	NA	NA	NA	48.381	NA	6.74465	NA	NA	NA	NA	98.8005	NA	NA	NA	NA	NA	NA	NA	NA
PHF21A_P1P2	1.52579	NA	6.07493	NA	NA	NA	NA	NA	NA	NA	NA	2.95419	NA	NA	NA	NA	NA	NA	NA	NA	NA	NA	NA	NA	NA	NA	NA	NA	NA	NA	NA	NA	NA	NA	NA	NA	NA	NA	NA	NA	NA	NA	NA	NA	NA	NA	NA	NA	NA
CENPW_P1P2	4.0859	NA	9.904	NA	28.9052	NA	7.7717	NA	NA	NA	NA	13.9751	NA	-5.80145	NA	NA	NA	NA	NA	NA	29.9021	11.4546	19.3189	NA	4.03944	NA	17.3698	NA	61.7389	-11.4749	15.6598	-11.7307	NA	NA	NA	NA	NA	NA	NA	NA	9.03942	NA	NA	NA	NA	NA	NA	NA	NA
LENG8_P1P2	10.3658	NA	16.2497	NA	NA	NA	4.4825	NA	NA	NA	NA	13.3398	NA	-8.36546	NA	NA	NA	NA	NA	NA	NA	NA	NA	NA	NA	NA	NA	NA	NA	NA	NA	NA	NA	NA	NA	NA	NA	NA	NA	NA	NA	NA	NA	NA	NA	NA	NA	NA	NA
SPAG5_P1P2	3.31839	NA	13.4409	NA	21.8997	NA	7.70068	19.5446	NA	NA	NA	5.27808	NA	NA	NA	NA	NA	NA	NA	NA	NA	NA	NA	NA	NA	NA	NA	NA	NA	NA	NA	NA	NA	4.60701	NA	NA	NA	NA	NA	NA	32.2441	NA	NA	NA	NA	NA	NA	NA	NA
ATP5L_P1P2	14.1643	NA	17.505	NA	15.8557	NA	25.5808	NA	NA	NA	NA	22.3411	NA	-2.29766	NA	NA	NA	NA	NA	NA	NA	NA	NA	NA	NA	NA	NA	NA	NA	NA	NA	NA	NA	NA	NA	NA	NA	NA	NA	NA	NA	NA	NA	NA	NA	NA	NA	-9.01228	NA
RPS15_P1P2	5.56618	NA	7.21239	NA	NA	NA	3.9272	NA	NA	NA	NA	19.2264	NA	NA	NA	NA	NA	NA	NA	NA	NA	NA	NA	NA	NA	NA	NA	NA	NA	NA	NA	NA	NA	NA	NA	7.25618	NA	NA	NA	NA	NA	NA	NA	NA	NA	NA	NA	NA	NA
RPL31_P1P2	56.4424	NA	124.819	NA	NA	NA	74.3942	44.3716	NA	NA	NA	112.403	NA	-2.66818	NA	NA	NA	NA	NA	NA	NA	NA	NA	NA	NA	NA	NA	NA	NA	NA	NA	NA	NA	44.827	NA	9.50331	NA	NA	NA	NA	81.5041	NA	NA	NA	NA	NA	NA	NA	NA
BPY2_ENST00000331070.3	1.41363	-1.37435	NA	NA	-2.33789	NA	NA	NA	NA	NA	NA	NA	NA	NA	NA	NA	NA	NA	NA	NA	NA	NA	NA	NA	NA	NA	NA	NA	NA	NA	NA	NA	NA	NA	NA	NA	NA	NA	NA	NA	NA	NA	NA	NA	NA	NA	NA	NA	NA
BPY2C_ENST00000382287.1	1.41363	-1.37435	NA	NA	-2.33789	NA	NA	NA	NA	NA	NA	NA	NA	NA	NA	NA	NA	NA	NA	NA	NA	NA	NA	NA	NA	NA	NA	NA	NA	NA	NA	NA	NA	NA	NA	NA	NA	NA	NA	NA	NA	NA	NA	NA	NA	NA	NA	NA	NA
BPY2B_ENST00000382392.1	1.41363	-1.37435	NA	NA	-2.33789	NA	NA	NA	NA	NA	NA	NA	NA	NA	NA	NA	NA	NA	NA	NA	NA	NA	NA	NA	NA	NA	NA	NA	NA	NA	NA	NA	NA	NA	NA	NA	NA	NA	NA	NA	NA	NA	NA	NA	NA	NA	NA	NA	NA
SP1_P1P2	6.60898	NA	16.1432	24.3133	NA	NA	11.7162	-13.6837	NA	NA	NA	10.8623	NA	-6.60146	NA	NA	NA	NA	18.1672	-47.7587	-45.4594	-20.2855	-19.2241	-29.5815	-64.5758	-42.6605	15.2974	-47.1328	-61.7373	-74.8034	-57.9072	NA	-49.1113	NA	NA	NA	NA	NA	NA	NA	NA	NA	NA	NA	NA	NA	NA	NA	NA
NARS2_P1P2	11.8728	-16.5546	15.885	NA	NA	-6.07079	17.5319	NA	NA	NA	NA	19.4871	NA	-3.53664	7.59684	NA	NA	NA	15.7146	-37.6926	-28.6003	NA	-3.35711	-19.2326	-50.7882	-14.4212	23.2937	-22.304	-33.3163	-43.6658	-41.942	-20.2707	-32.3856	NA	NA	NA	-3.50441	NA	NA	NA	NA	NA	NA	NA	NA	-18.4951	NA	-9.09657	NA
ARSD_P1P2	3.06605	NA	NA	NA	NA	NA	NA	NA	NA	NA	NA	NA	NA	NA	NA	NA	NA	NA	NA	NA	NA	NA	NA	NA	NA	NA	NA	NA	NA	NA	NA	NA	NA	NA	NA	NA	NA	NA	NA	NA	NA	NA	NA	NA	NA	NA	NA	NA	NA
CHCHD3_P1P2	19.3491	NA	21.6382	NA	NA	-4.39131	27.5467	NA	NA	NA	NA	23.3084	NA	-9.67056	NA	NA	NA	NA	NA	NA	NA	NA	NA	NA	NA	NA	NA	NA	NA	NA	NA	NA	NA	NA	NA	NA	NA	NA	NA	NA	NA	NA	NA	NA	NA	NA	-3.97444	NA	NA
COPS3_P1P2	7.05043	NA	18.263	NA	NA	-15.7926	14.8897	52.8475	NA	NA	NA	20.2485	-6.10872	NA	NA	NA	NA	NA	NA	NA	NA	NA	NA	NA	NA	NA	NA	NA	NA	NA	NA	NA	NA	NA	NA	NA	NA	NA	NA	NA	NA	NA	NA	NA	NA	NA	NA	NA	NA
RPA3_P1P2	47.0909	NA	90.8273	NA	17.9503	NA	46.2537	46.807	NA	-5.46652	NA	27.947	NA	-2.77357	NA	NA	3.28724	NA	NA	NA	NA	NA	NA	NA	NA	NA	NA	NA	NA	NA	NA	NA	NA	NA	NA	9.27074	-4.51604	NA	NA	NA	27.5961	NA	NA	NA	NA	NA	NA	NA	NA
NOL9_P1P2	5.64703	NA	15.9696	NA	NA	-7.91327	22.1803	4.61758	NA	NA	NA	24.6452	-5.07074	NA	NA	NA	NA	NA	NA	NA	NA	NA	NA	NA	NA	NA	NA	NA	NA	NA	NA	NA	NA	NA	NA	NA	NA	NA	NA	NA	NA	-4.66507	NA	NA	NA	NA	NA	NA	NA
HARS_P1P2	54.8629	NA	118.137	NA	NA	NA	69.5724	NA	4.80003	6.57455	NA	118.634	NA	-17.5691	NA	NA	NA	NA	NA	NA	NA	NA	NA	NA	NA	NA	NA	NA	NA	NA	NA	NA	NA	NA	NA	17.7524	-13.1741	NA	NA	NA	41.0953	NA	NA	NA	NA	NA	NA	NA	NA
EXOC6_P1P2	3.41106	NA	NA	NA	NA	NA	NA	NA	NA	NA	NA	NA	NA	NA	NA	NA	NA	NA	NA	NA	NA	NA	NA	NA	NA	NA	NA	NA	NA	NA	NA	NA	NA	NA	NA	NA	NA	NA	NA	NA	NA	NA	NA	NA	NA	NA	-1.51037	NA	NA
ZNRD1_P1P2	48.0707	NA	72.2874	9.86779	-31.5372	-17.2462	54.9529	NA	NA	5.73672	NA	74.9877	-13.5738	-7.66911	NA	NA	NA	NA	NA	NA	NA	NA	NA	NA	NA	NA	NA	NA	NA	NA	NA	NA	NA	NA	NA	4.10361	NA	NA	NA	NA	38.065	NA	NA	NA	NA	NA	6.14103	-1.71222	NA
TIMM17A_P1P2	7.58719	-10.9387	13.3783	18.7964	NA	-20.3798	11.5326	NA	NA	NA	NA	8.53446	NA	NA	NA	-9.08428	NA	NA	NA	NA	NA	NA	NA	NA	NA	NA	NA	NA	NA	NA	NA	NA	NA	NA	NA	NA	NA	NA	NA	NA	NA	NA	NA	NA	NA	NA	-2.1806	NA	NA
TMEM258_P1P2	7.65066	NA	12.1495	NA	-5.33356	NA	7.46495	NA	NA	NA	NA	11.7652	NA	-6.39675	NA	NA	NA	NA	NA	NA	NA	NA	NA	NA	NA	NA	NA	NA	NA	NA	NA	NA	NA	NA	NA	NA	NA	NA	NA	NA	NA	NA	15.1752	NA	NA	NA	NA	NA	NA
MTHFD1L_P1P2	8.86174	-4.59994	19.5657	NA	-5.63779	-16.1384	10.9569	NA	NA	2.19447	NA	15.8132	-8.51722	-27.6198	NA	NA	NA	NA	NA	NA	NA	NA	NA	NA	NA	NA	NA	NA	NA	NA	NA	NA	NA	NA	NA	NA	NA	NA	NA	NA	NA	NA	NA	NA	NA	NA	-2.48069	NA	NA
SDHC_P1P2	29.2858	NA	40.7755	NA	NA	NA	18.8186	NA	NA	NA	NA	49.279	-5.15147	-28.6324	NA	NA	NA	NA	25.9102	-33.7897	-43.6528	NA	NA	-11.3122	-8.12883	-28.9472	27.3165	-12.6745	-45.6868	-69.4608	-42.6986	-9.64034	-9.22274	NA	NA	NA	NA	NA	NA	NA	NA	NA	NA	NA	NA	NA	NA	NA	18.1534
RRP12_P1P2	44.8208	NA	73.5709	NA	-1.84022	-6.69782	29.2744	45.9223	3.54004	2.79487	NA	63.9706	NA	NA	NA	NA	NA	NA	NA	NA	NA	NA	NA	NA	NA	NA	NA	NA	NA	NA	NA	NA	NA	16.3786	-22.6608	10.6993	-4.835	NA	NA	NA	70.5846	NA	NA	NA	NA	NA	NA	NA	NA
STRAP_P1P2	5.49696	-5.20011	9.93886	NA	13.754	-13.1718	19.2773	NA	NA	-3.50453	NA	14.8833	-26.1628	NA	NA	NA	NA	NA	NA	NA	NA	NA	NA	NA	NA	NA	NA	NA	NA	NA	NA	NA	NA	NA	NA	NA	NA	NA	NA	NA	NA	NA	NA	NA	NA	NA	NA	9.42668	NA
EP400_P1P2	28.8656	NA	60.7305	NA	-22.4365	-12.3019	28.2786	NA	NA	-10.6215	NA	65.668	NA	-7.8435	NA	NA	NA	NA	NA	NA	NA	NA	NA	NA	NA	NA	NA	NA	NA	NA	NA	NA	NA	5.74543	NA	2.92671	NA	NA	NA	NA	10.0448	-6.3031	NA	NA	NA	NA	NA	NA	NA
STXBP4_P1P2	11.2983	NA	39.8749	NA	-7.81369	-9.83125	25.0135	NA	NA	NA	NA	39.0394	-7.48881	-19.0874	17.5969	NA	12.4781	NA	27.2269	-44.7845	-39.2464	NA	NA	-16.9689	-47.6518	-17.8976	37.0497	-28.1578	-72.1014	-60.8999	-59.372	-48.0474	-39.3213	NA	NA	NA	NA	NA	NA	NA	NA	NA	NA	NA	NA	NA	NA	NA	NA
MED11_P1P2	33.1608	NA	30.5106	NA	NA	5.25756	49.5019	NA	NA	NA	NA	68.2756	NA	-4.92938	NA	NA	NA	NA	32.5916	-77.8648	-67.5417	-52.3371	-44.3459	-30.727	-68.8143	-67.975	37.1363	-48.1865	-99.7888	-79.9256	-73.1149	-60.1993	-66.0845	NA	NA	8.48745	-7.27871	NA	NA	NA	NA	NA	NA	NA	NA	NA	NA	NA	NA
CENPF_P1P2	6.6066	NA	16.7753	NA	21.6471	NA	6.49535	17.9625	NA	NA	NA	10.495	NA	-2.05851	NA	NA	3.27685	NA	8.5127	12.8766	29.5544	56.6409	57.9085	NA	12.8409	4.87081	9.47457	7.08577	72.3584	-20.0309	14.7458	NA	11.5161	NA	NA	NA	NA	NA	NA	NA	NA	NA	NA	NA	NA	NA	NA	NA	NA
FAM212B_P2	1.85625	NA	NA	NA	NA	NA	NA	-4.35996	NA	NA	NA	NA	NA	NA	NA	NA	NA	NA	NA	NA	NA	NA	NA	NA	NA	NA	NA	NA	NA	NA	NA	NA	NA	NA	NA	NA	NA	NA	NA	NA	NA	NA	NA	NA	NA	NA	NA	NA	NA
FAT1_P2	2.12537	NA	NA	NA	NA	NA	NA	NA	NA	NA	NA	NA	NA	NA	NA	NA	NA	NA	NA	NA	NA	NA	NA	NA	NA	NA	NA	NA	NA	NA	NA	NA	NA	NA	NA	NA	NA	NA	NA	NA	NA	NA	2.37112	NA	NA	NA	NA	NA	NA
RPL7L1_P1P2	17.8381	NA	39.0848	8.17576	-4.17559	NA	13.8766	18.2684	NA	NA	NA	62.8177	NA	NA	NA	NA	NA	NA	NA	NA	NA	NA	NA	NA	NA	NA	NA	NA	NA	NA	NA	NA	NA	NA	NA	NA	-2.07345	NA	NA	NA	NA	NA	NA	NA	NA	NA	NA	NA	NA
SDHB_P1P2	8.56361	NA	16.6397	NA	NA	NA	7.65422	NA	NA	NA	NA	44.42	NA	-10.0077	NA	NA	NA	NA	NA	NA	NA	NA	NA	NA	NA	NA	NA	NA	NA	NA	NA	NA	NA	NA	NA	NA	NA	NA	NA	NA	NA	NA	-1.52055	NA	NA	NA	NA	NA	NA
ZBED6_P1P2	1.45166	NA	6.28052	NA	NA	NA	NA	NA	NA	NA	NA	2.10553	NA	-5.58554	NA	NA	NA	NA	NA	NA	NA	NA	NA	NA	NA	NA	NA	NA	NA	NA	NA	NA	NA	NA	NA	NA	NA	NA	NA	NA	NA	NA	NA	NA	NA	NA	NA	NA	NA
MCPH1_P1P2	3.58155	NA	9.5211	3.95899	14.4103	NA	8.19575	NA	NA	NA	NA	8.36957	-17.4835	6.63195	NA	NA	NA	NA	NA	NA	NA	NA	NA	NA	NA	NA	NA	NA	NA	NA	NA	NA	NA	13.2555	NA	4.67441	NA	NA	NA	NA	3.51302	NA	NA	NA	NA	NA	NA	NA	NA
COPS8_P1P2	16.0605	NA	NA	NA	NA	-9.12223	11.4446	12.1919	NA	NA	NA	NA	NA	NA	NA	NA	NA	NA	NA	NA	NA	NA	NA	NA	NA	NA	NA	NA	NA	NA	NA	NA	NA	NA	-2.89569	NA	NA	NA	NA	NA	3.02315	NA	NA	NA	NA	NA	NA	-8.59958	NA
NDUFV1_P1	3.98466	NA	5.77923	NA	NA	NA	NA	NA	NA	NA	NA	12.1212	8.2485	-3.87396	NA	NA	NA	NA	NA	NA	NA	NA	NA	NA	NA	NA	NA	NA	NA	NA	NA	NA	NA	NA	-1.91342	NA	-2.08717	NA	NA	NA	NA	NA	NA	NA	NA	NA	NA	-4.48585	NA
ELP2_P1P2	6.81377	NA	5.83442	NA	NA	NA	9.29876	NA	NA	NA	NA	15.2708	NA	NA	NA	NA	NA	NA	NA	NA	NA	NA	NA	NA	NA	NA	NA	NA	NA	NA	NA	NA	NA	NA	NA	2.3652	NA	NA	NA	NA	1.88871	NA	NA	NA	NA	NA	NA	NA	NA
VCP_P1P2	27.6863	16.4134	74.6934	NA	58.0104	49.6554	26.1241	26.6653	NA	-3.2993	NA	65.999	NA	-15.5794	NA	NA	NA	NA	NA	NA	NA	NA	NA	NA	NA	NA	NA	NA	NA	NA	NA	NA	NA	38.4492	NA	12.9534	NA	NA	NA	NA	106.232	NA	-29.7224	NA	NA	NA	NA	NA	NA
GLRX5_P1P2	17.4521	-13.8016	22.1757	9.02401	NA	-16.2225	33.3725	NA	NA	NA	NA	19.7253	NA	-2.43766	NA	NA	NA	NA	NA	NA	NA	NA	NA	NA	NA	NA	NA	NA	NA	NA	NA	NA	NA	NA	NA	NA	NA	NA	NA	NA	NA	NA	NA	NA	NA	NA	-9.78857	NA	NA
INTS5_P1P2	10.7135	NA	29.8813	20.6401	10.0094	NA	13.2762	NA	NA	-4.31763	NA	60.1532	-5.01682	-4.67324	NA	NA	NA	NA	NA	NA	NA	NA	NA	NA	NA	NA	NA	NA	NA	NA	NA	NA	NA	NA	NA	NA	NA	NA	NA	NA	11.7213	NA	4.6706	NA	NA	NA	NA	NA	NA
LOC81691_P1P2	1.9852	NA	NA	NA	NA	NA	NA	NA	NA	NA	NA	NA	NA	NA	NA	NA	NA	NA	NA	NA	NA	NA	NA	NA	NA	NA	NA	NA	NA	NA	NA	NA	NA	NA	NA	NA	NA	NA	NA	NA	NA	NA	NA	NA	NA	NA	NA	NA	NA
LSM3_P1P2	11.2551	NA	17.9038	NA	NA	NA	10.8671	NA	NA	NA	NA	23.9518	-5.81048	NA	NA	NA	NA	NA	9.10973	-26.1087	-13.8291	7.26594	NA	NA	-4.60172	NA	16.3392	NA	-25.6668	-42.3582	NA	-21.3412	-26.8267	NA	NA	6.5614	NA	NA	NA	NA	38.7825	NA	NA	NA	NA	NA	NA	NA	NA
ZNF227_P1P2	1.15085	NA	NA	NA	NA	NA	NA	NA	NA	NA	NA	NA	NA	NA	NA	NA	NA	NA	NA	NA	NA	NA	NA	NA	NA	NA	NA	NA	NA	NA	NA	NA	NA	NA	NA	NA	NA	NA	NA	NA	NA	NA	NA	NA	NA	NA	NA	NA	NA
ZC3H11A_P1P2	2.61888	NA	9.53369	NA	NA	NA	3.35888	NA	NA	NA	NA	4.82119	NA	-11.3011	NA	NA	NA	NA	2.7904	-11.771	-2.93468	NA	8.40772	NA	-5.6711	NA	4.69135	NA	-16.5871	-31.1853	21.2661	NA	-2.30312	NA	NA	NA	NA	NA	NA	NA	NA	NA	NA	NA	NA	NA	NA	NA	NA
POLR3B_P1P2	20.1909	-17.1527	55.8136	NA	NA	-20.663	33.0909	NA	NA	-19.1801	NA	53.8932	-26.5078	-4.17263	NA	NA	NA	NA	26.6321	-50.765	-40.4404	-24.7678	-21.8964	-21.9499	-62.5398	-46.3123	34.567	-43.7096	-65.258	-58.1671	-41.7374	-19.6887	-58.0003	NA	NA	NA	NA	NA	NA	NA	13.9449	NA	NA	NA	NA	NA	NA	NA	NA
COPB2_P1P2	51.2212	10.787	92.3617	4.2622	27.4699	43.9979	39.1184	31.942	NA	-5.63514	NA	75.2196	NA	NA	NA	NA	NA	NA	NA	NA	NA	NA	NA	NA	NA	NA	NA	NA	NA	NA	NA	NA	NA	82.1435	NA	24.9533	NA	NA	NA	NA	70.8466	NA	NA	NA	NA	NA	NA	NA	NA
HSP90B1_P1P2	2.97131	30.4836	7.30899	NA	NA	44.2838	2.29619	NA	NA	NA	NA	1.36697	NA	NA	NA	NA	NA	NA	NA	NA	NA	NA	NA	NA	NA	NA	NA	NA	NA	NA	NA	NA	NA	NA	NA	NA	NA	NA	NA	NA	NA	NA	NA	NA	NA	NA	NA	NA	NA
THOC2_P1P2	46.5639	NA	58.2569	NA	43.0282	NA	40.3042	23.8114	NA	NA	NA	74.8026	NA	NA	NA	NA	NA	NA	NA	NA	NA	NA	NA	NA	NA	NA	NA	NA	NA	NA	NA	NA	NA	43.8045	NA	17.9547	NA	NA	NA	NA	32.1559	NA	NA	NA	NA	NA	NA	NA	NA
THAP1_P1P2	4.20832	NA	5.05045	NA	25.1365	20.613	14.9016	NA	NA	NA	NA	8.0056	NA	-4.93388	10.0048	NA	NA	NA	NA	NA	NA	NA	NA	NA	NA	NA	NA	NA	NA	NA	NA	NA	NA	NA	NA	NA	NA	NA	NA	NA	NA	NA	NA	NA	NA	NA	NA	NA	NA
RPE_P1P2	4.19293	NA	NA	NA	NA	NA	5.32769	NA	NA	NA	NA	7.07165	NA	-4.51459	NA	NA	NA	4.18015	NA	NA	NA	NA	NA	NA	NA	NA	NA	NA	NA	NA	NA	NA	NA	NA	NA	NA	NA	NA	NA	NA	NA	NA	NA	NA	NA	NA	NA	NA	15.7058
TRPC4_P1P2	2.13706	NA	NA	NA	-1.54805	NA	NA	NA	NA	NA	NA	NA	NA	NA	NA	NA	NA	NA	NA	NA	NA	NA	NA	NA	NA	NA	NA	NA	NA	NA	NA	NA	NA	NA	NA	NA	NA	NA	NA	NA	NA	NA	NA	NA	NA	NA	-2.62767	NA	NA
PALB2_P1P2	8.01903	NA	12.2628	NA	NA	NA	5.42173	NA	NA	NA	NA	11.8489	NA	24.7388	11.3216	NA	8.17669	NA	NA	NA	NA	NA	NA	NA	NA	NA	NA	NA	NA	NA	NA	NA	NA	NA	NA	NA	NA	NA	NA	NA	NA	NA	NA	NA	NA	NA	NA	NA	NA
MTA2_P1P2	8.45899	NA	12.2808	NA	7.04142	NA	6.40632	-3.84992	NA	NA	NA	NA	NA	NA	NA	NA	NA	NA	NA	NA	NA	NA	NA	NA	NA	NA	NA	NA	NA	NA	NA	NA	NA	NA	NA	3.28518	NA	NA	NA	NA	NA	NA	NA	NA	NA	NA	NA	NA	NA
HUWE1_P1P2	3.40946	14.5076	16.7861	8.79343	41.9201	13.3335	13.9149	66.8477	NA	-7.19668	NA	11.33	NA	-7.71982	3.77931	NA	NA	NA	NA	NA	NA	NA	NA	NA	NA	NA	NA	NA	NA	NA	NA	NA	NA	NA	NA	NA	-3.6291	NA	NA	NA	NA	NA	NA	NA	NA	NA	NA	NA	30.1088
MRPS25_P1P2	27.459	-4.0881	46.6097	NA	NA	-23.7126	41.9507	NA	NA	NA	NA	53.8866	-3.61293	-8.90893	NA	NA	NA	NA	25.6035	-66.6114	-44.6834	-9.57558	-3.70598	-22.5795	-60.2009	-36.6911	34.395	-45.7009	-55.9539	-60.1894	-68.539	-37.6096	-47.2269	3.30239	-3.69776	NA	-5.21904	NA	NA	NA	6.44334	NA	NA	NA	NA	NA	-9.05022	-16.5551	NA
MED17_P1P2	44.1215	NA	48.8498	NA	NA	25.7277	34.3977	NA	NA	16.3201	NA	29.5252	NA	NA	NA	NA	NA	NA	35.2581	-59.417	-53.4419	-43.4956	-38.868	-32.4715	-72.082	-56.3541	37.9261	-34.8682	-75.6209	-72.2944	-54.3939	-43.7917	-63.2046	NA	NA	NA	NA	NA	NA	NA	NA	2.28766	NA	NA	NA	NA	NA	NA	NA
RPP14_P1P2	14.3117	NA	27.8531	NA	-10.6129	NA	24.4739	NA	NA	NA	NA	55.0255	-4.98767	-7.66494	NA	NA	NA	NA	NA	NA	NA	NA	NA	NA	NA	NA	NA	NA	NA	NA	NA	NA	NA	NA	NA	NA	NA	NA	NA	NA	NA	NA	NA	NA	NA	NA	NA	NA	NA
GADD45GIP1_P1P2	16.1239	-8.73683	20.2346	NA	NA	-8.15958	26.6988	NA	NA	NA	NA	40.2359	NA	-5.55459	NA	NA	NA	NA	NA	NA	NA	NA	NA	NA	NA	NA	NA	NA	NA	NA	NA	NA	NA	NA	NA	NA	NA	NA	NA	NA	NA	NA	NA	NA	NA	NA	NA	NA	-17.289
DEK_P1P2	2.28459	NA	NA	NA	NA	NA	6.04591	NA	NA	NA	NA	NA	NA	NA	NA	NA	NA	NA	NA	NA	NA	NA	NA	NA	NA	NA	NA	NA	NA	NA	NA	NA	NA	NA	NA	NA	NA	NA	NA	NA	NA	NA	NA	NA	NA	NA	NA	NA	NA
GPR124_P1P2	4.37396	NA	NA	NA	NA	NA	NA	NA	NA	NA	NA	NA	NA	NA	NA	NA	NA	NA	NA	NA	NA	NA	NA	NA	NA	NA	NA	NA	NA	NA	NA	NA	NA	NA	NA	NA	NA	NA	NA	NA	NA	NA	NA	NA	NA	NA	NA	NA	NA
CCNJ_P1P2	2.73041	NA	15.046	NA	NA	NA	NA	NA	NA	NA	NA	6.48581	NA	NA	NA	NA	NA	NA	7.06738	-24.0078	-17.4579	-19.2971	-14.4524	-5.37897	-12.6093	NA	13.1556	-18.2577	-24.879	-24.8869	-17.8353	-15.3193	-17.9973	NA	NA	NA	NA	NA	NA	NA	NA	NA	4.53892	NA	NA	NA	NA	NA	NA
RARS2_P1P2	33.4074	-11.8179	38.6924	NA	NA	-21.4814	36.8146	NA	NA	NA	NA	47.7134	NA	-10.0378	7.25199	NA	NA	NA	32.3975	-52.6686	-39.4685	-4.93912	-4.9322	-27.1629	-68.548	-46.2499	34.7191	-10.2188	-45.6754	-46.3193	-52.348	-31.6209	-43.1804	NA	-2.648	NA	NA	NA	NA	NA	NA	NA	NA	NA	NA	NA	-5.27708	-8.85618	NA
TNKS1BP1_P1	4.9059	NA	NA	NA	NA	NA	NA	NA	NA	NA	NA	NA	NA	NA	NA	NA	NA	NA	NA	NA	NA	NA	NA	NA	NA	NA	NA	NA	NA	NA	NA	NA	NA	NA	NA	NA	NA	NA	NA	NA	NA	NA	NA	NA	NA	NA	NA	NA	NA
NHLRC2_P1P2	3.59018	NA	4.42936	NA	NA	NA	4.28091	12.5418	NA	NA	NA	10.9681	-2.17012	NA	NA	NA	5.91641	NA	NA	NA	NA	NA	NA	NA	NA	NA	NA	NA	NA	NA	NA	NA	NA	NA	NA	NA	NA	NA	NA	NA	NA	NA	NA	NA	NA	NA	NA	NA	NA
HDAC7_P1P2	11.0897	NA	17.5791	NA	NA	16.2025	NA	NA	NA	NA	NA	25.7656	NA	NA	NA	NA	NA	NA	NA	NA	NA	NA	NA	NA	NA	NA	NA	NA	NA	NA	NA	NA	NA	NA	NA	NA	NA	NA	NA	NA	NA	NA	-6.61778	NA	NA	NA	NA	NA	NA
GEN1_P1P2	3.04629	NA	NA	NA	NA	NA	NA	NA	NA	NA	NA	NA	NA	NA	NA	NA	NA	NA	NA	NA	NA	NA	NA	NA	NA	NA	NA	NA	NA	NA	NA	NA	NA	NA	NA	NA	NA	NA	NA	NA	NA	NA	NA	NA	NA	NA	NA	NA	NA
GATAD2B_P1P2	2.9797	NA	NA	NA	NA	8.14809	NA	NA	NA	NA	NA	NA	NA	NA	NA	NA	NA	NA	NA	NA	NA	NA	NA	NA	NA	NA	NA	NA	NA	NA	NA	NA	NA	3.75255	NA	NA	NA	NA	NA	NA	NA	NA	NA	NA	NA	NA	NA	NA	NA
MAU2_P1P2	7.75784	NA	5.84991	NA	9.9231	NA	22.3769	26.881	NA	NA	NA	16.9242	-19.1333	NA	NA	NA	NA	NA	19.7124	-64.5494	-59.0761	-17.942	-26.8832	-26.5115	-72.6489	-22.2168	23.9418	-45.5503	-94.5366	-79.464	-56.9443	-57.354	-63.6125	NA	-12.5169	NA	NA	NA	NA	NA	NA	4.42106	NA	NA	NA	NA	NA	NA	26.7275
PRPS1_P1P2	6.45325	NA	29.741	NA	30.3522	16.0357	11.2901	NA	NA	NA	NA	8.39258	34.2531	-7.28733	51.3662	NA	16.7675	NA	NA	NA	NA	NA	NA	NA	NA	NA	NA	NA	NA	NA	NA	NA	NA	NA	NA	NA	NA	NA	NA	NA	NA	NA	NA	NA	NA	NA	NA	NA	27.2109
OTOP2_P1P2	2.61278	NA	NA	NA	NA	NA	NA	NA	NA	NA	NA	NA	NA	NA	NA	NA	NA	NA	NA	NA	NA	NA	NA	NA	NA	NA	NA	NA	NA	NA	NA	NA	NA	NA	NA	NA	NA	NA	NA	NA	NA	NA	1.75927	NA	NA	NA	NA	NA	NA
RPL32_P1P2	17.9251	NA	32.6765	NA	-9.8571	NA	10.781	NA	NA	NA	NA	24.8461	NA	NA	NA	NA	NA	NA	NA	NA	NA	NA	NA	NA	NA	NA	NA	NA	NA	NA	NA	NA	NA	NA	NA	7.68646	NA	NA	NA	NA	34.3391	NA	NA	NA	NA	NA	NA	NA	NA
RAD51B_P1P2	7.47614	NA	7.37357	NA	NA	NA	9.41588	11.4547	NA	NA	NA	10.3648	NA	NA	NA	NA	NA	NA	NA	NA	NA	NA	NA	NA	NA	NA	NA	NA	NA	NA	NA	NA	NA	NA	NA	NA	NA	NA	NA	NA	NA	NA	NA	NA	NA	NA	NA	NA	NA
SUCLG1_P1P2	4.0125	NA	7.19179	NA	NA	-6.37284	10.8046	NA	7.54641	-11.4233	NA	NA	NA	NA	31.7779	-24.7025	33.5887	NA	NA	NA	NA	NA	NA	NA	NA	NA	NA	NA	NA	NA	NA	NA	NA	NA	NA	NA	NA	NA	NA	NA	NA	NA	6.37248	NA	NA	NA	NA	NA	NA
GPBP1_P1P2	2.1489	NA	NA	NA	NA	NA	NA	NA	NA	NA	NA	NA	NA	NA	NA	NA	NA	NA	NA	NA	NA	NA	NA	NA	NA	NA	NA	NA	NA	NA	NA	NA	NA	NA	NA	NA	NA	NA	NA	NA	NA	NA	NA	NA	NA	NA	NA	NA	NA
WRB_P1P2	6.89095	NA	14.4226	NA	-5.19224	-9.44056	16.671	NA	NA	NA	NA	48.4853	-21.8557	-18.1319	NA	NA	NA	NA	NA	NA	NA	NA	NA	NA	NA	NA	NA	NA	NA	NA	NA	NA	NA	NA	NA	NA	NA	NA	NA	NA	NA	NA	3.71077	NA	NA	NA	NA	NA	NA
MTBP_P1P2	21.056	NA	33.1909	NA	NA	NA	15.5513	NA	NA	NA	NA	18.0626	5.91596	17.114	NA	NA	NA	NA	26.8573	-37.3504	-43.9575	-34.4707	-44.0878	-18.6682	-44.4946	-43.808	28.5086	NA	-48.6296	-47.8296	-53.7276	-27.8889	-58.8192	NA	NA	NA	NA	NA	NA	NA	37.6421	NA	NA	NA	NA	NA	NA	NA	NA
ABCE1_P1P2	50.7973	NA	95.2136	NA	NA	NA	67.2982	12.8457	NA	-7.90817	NA	61.7921	-7.04324	-12.007	NA	NA	NA	NA	NA	NA	NA	NA	NA	NA	NA	NA	NA	NA	NA	NA	NA	NA	NA	47.8317	NA	13.8331	NA	NA	NA	NA	86.4149	NA	NA	NA	NA	NA	NA	NA	NA
RBM17_P1P2	9.48871	NA	33.4044	NA	NA	NA	29.205	NA	NA	-11.2796	NA	53.5197	NA	-31.5307	NA	NA	7.7362	NA	NA	NA	NA	NA	NA	NA	NA	NA	NA	NA	NA	NA	NA	NA	NA	NA	-24.4896	5.40358	NA	NA	NA	NA	8.40317	16.168	NA	NA	NA	NA	NA	NA	NA
ARID2_P1P2	12.6584	-8.92977	26.4377	NA	NA	-19.9853	7.97082	NA	NA	3.98836	NA	11.0869	NA	-7.54181	NA	NA	6.86962	NA	18.4096	-53.1117	-44.7785	-33.2521	-23.94	-26.0108	-69.4295	-33.6201	16.985	-33.9312	-56.8553	-54.8535	-53.5265	-28.9586	-48.9887	NA	-9.67232	-2.403	NA	NA	NA	NA	2.2705	NA	NA	NA	NA	NA	NA	NA	NA
PSMD1_P1P2	27.3472	NA	59.2871	32.5439	31.0674	-5.16774	11.0095	44.661	NA	-8.9981	NA	30.6218	NA	-4.27629	NA	NA	NA	NA	NA	NA	NA	NA	NA	NA	NA	NA	NA	NA	NA	NA	NA	NA	NA	29.8802	NA	10.93	NA	NA	NA	NA	51.363	NA	NA	NA	NA	NA	NA	NA	NA
RNF20_P1P2	39.7655	NA	54.6118	-21.9142	NA	NA	33.2977	NA	NA	NA	NA	71.6344	-22.983	NA	NA	NA	8.22664	NA	39.6577	-46.6831	-40.7059	NA	NA	-21.4338	-44.7263	-42.6348	40.311	-43.4782	-55.1189	-67.9167	-33.621	-29.7245	-47.4582	NA	NA	NA	NA	NA	NA	NA	24.4854	NA	-3.51141	NA	NA	NA	NA	NA	-24.1793
RPAP1_P1P2	35.337	NA	69.1571	NA	13.5514	NA	38.2183	13.1387	4.94536	NA	NA	85.7043	NA	NA	NA	NA	NA	NA	NA	NA	NA	NA	NA	NA	NA	NA	NA	NA	NA	NA	NA	NA	NA	118.422	NA	24.022	-14.5671	NA	NA	NA	118.738	NA	NA	NA	NA	NA	NA	NA	NA
TOE1_P1P2	11.2182	NA	24.1697	NA	NA	NA	26.5811	-8.36129	NA	NA	NA	17.4331	-20.1899	-7.3412	NA	NA	11.2683	NA	NA	NA	NA	NA	NA	NA	NA	NA	NA	NA	NA	NA	NA	NA	NA	6.01798	NA	NA	NA	NA	NA	NA	NA	12.8314	NA	NA	NA	NA	NA	NA	NA
YIPF5_P1P2	7.68223	41.0299	23.4003	-3.80961	-15.0434	58.9027	11.7213	NA	NA	NA	NA	14.3994	NA	-9.06772	4.09778	NA	NA	NA	11.292	-22.1116	-4.34783	NA	-4.23317	-11.482	-15.6449	-13.69	6.21056	NA	NA	NA	NA	1.81445	-23.2339	NA	NA	NA	NA	NA	NA	NA	NA	NA	NA	NA	NA	NA	NA	NA	NA
KANSL2_P1P2	68.7333	NA	104.888	NA	NA	NA	62.0937	5.67522	NA	-6.72847	NA	89.1719	NA	NA	NA	NA	NA	NA	NA	NA	NA	NA	NA	NA	NA	NA	NA	NA	NA	NA	NA	NA	NA	NA	-6.26656	8.59491	NA	NA	NA	NA	69.3752	NA	NA	NA	NA	NA	NA	NA	NA
FDX1L_P1P2	24.1411	NA	31.7496	NA	NA	NA	45.5904	NA	NA	NA	NA	22.8288	NA	-4.64547	18.602	NA	NA	NA	NA	NA	NA	NA	NA	NA	NA	NA	NA	NA	NA	NA	NA	NA	NA	28.3735	-13.0872	5.04096	NA	NA	NA	NA	24.3873	NA	NA	NA	NA	NA	-2.73687	NA	NA
PLK1_P1P2	34.0565	NA	55.0149	NA	51.965	10.9263	18.1247	44.6472	NA	-9.01772	NA	28.3103	NA	NA	NA	NA	NA	NA	NA	NA	NA	NA	NA	NA	NA	NA	NA	NA	NA	NA	NA	NA	NA	NA	NA	17.5461	NA	NA	NA	NA	50.5871	NA	NA	NA	NA	NA	NA	NA	NA
LRRIQ4_ENST00000340806.6	2.31811	NA	NA	NA	NA	NA	NA	NA	NA	NA	NA	NA	NA	NA	NA	NA	NA	NA	NA	NA	NA	NA	NA	NA	NA	NA	NA	NA	NA	NA	NA	NA	NA	NA	NA	NA	NA	NA	NA	NA	NA	NA	NA	NA	NA	NA	NA	NA	NA
SEC23A_P1P2	3.65893	NA	NA	NA	NA	11.2308	NA	NA	NA	NA	NA	NA	NA	NA	NA	NA	NA	NA	NA	NA	NA	NA	NA	NA	NA	NA	NA	NA	NA	NA	NA	NA	NA	1.70069	NA	NA	NA	NA	NA	NA	NA	NA	NA	NA	NA	NA	-2.56307	NA	NA
WARS2_P1P2	8.68816	-8.63139	15.9483	NA	-4.17701	-12.1566	26.8779	NA	NA	NA	NA	17.4461	-14.7068	-7.43912	24.9592	NA	NA	NA	21.8735	-30.5752	-24.4322	-9.20342	-5.43918	-21.4171	-48.2535	-11.7279	22.0061	-20.239	-27.2402	-31.7024	-27.8977	-21.1936	-22.397	NA	NA	NA	NA	NA	NA	NA	NA	NA	NA	NA	NA	-17.0087	NA	NA	NA
COPS6_P1P2	47.7153	NA	71.9596	11.0032	NA	-12.4242	50.4099	23.463	NA	3.98182	NA	87.8546	NA	NA	NA	NA	NA	NA	NA	NA	NA	NA	NA	NA	NA	NA	NA	NA	NA	NA	NA	NA	NA	26.4011	-33.7391	NA	NA	NA	NA	NA	28.4663	NA	NA	NA	NA	NA	NA	-12.1631	NA
SSRP1_P1P2	33.2886	NA	67.4171	0.200806	NA	-4.31764	34.917	NA	NA	-2.11457	NA	71.434	NA	-5.84294	NA	NA	NA	NA	NA	NA	NA	NA	NA	NA	NA	NA	NA	NA	NA	NA	NA	NA	NA	NA	NA	13.0594	NA	NA	NA	NA	56.3219	NA	NA	NA	NA	NA	NA	NA	NA
DIMT1_P1P2	41.6159	NA	65.4239	NA	-8.46493	NA	37.783	30.3629	NA	2.66672	NA	57.0767	NA	NA	NA	NA	NA	NA	NA	NA	NA	NA	NA	NA	NA	NA	NA	NA	NA	NA	NA	NA	NA	NA	NA	8.20337	NA	NA	NA	NA	21.0211	NA	NA	NA	NA	NA	NA	5.59135	NA
ZCCHC9_P1P2	45.8413	NA	55.9965	NA	NA	-8.32025	42.0292	39.4493	5.89295	4.18364	NA	65.8934	NA	-6.33892	NA	NA	NA	NA	NA	NA	NA	NA	NA	NA	NA	NA	NA	NA	NA	NA	NA	NA	NA	NA	NA	9.25361	-5.83492	NA	NA	NA	NA	NA	NA	NA	NA	NA	NA	NA	NA
TXN_P1P2	31.6704	NA	38.0539	NA	NA	NA	26.9994	8.98028	NA	NA	NA	51.8126	NA	-13.8089	NA	NA	NA	NA	NA	NA	NA	NA	NA	NA	NA	NA	NA	NA	NA	NA	NA	NA	NA	NA	NA	NA	NA	NA	NA	NA	NA	NA	NA	NA	NA	NA	NA	-7.49273	NA
ARHGAP29_P1P2	3.68335	NA	NA	NA	NA	NA	NA	NA	NA	NA	NA	NA	NA	NA	NA	NA	NA	NA	NA	NA	NA	NA	NA	NA	NA	NA	NA	NA	NA	NA	NA	NA	NA	NA	NA	NA	NA	NA	NA	NA	NA	NA	NA	NA	NA	NA	NA	NA	NA
COX7C_P1P2	13.8589	NA	33.5997	NA	NA	-12.1501	15.8361	NA	NA	NA	NA	24.168	NA	-4.48284	NA	NA	NA	NA	21.7926	-49.9189	-42.3292	-17.3528	-18.8141	-23.1578	-44.9283	-35.7358	30.0481	-30.1565	-61.2343	-60.9108	-61.9334	-35.1672	-38.7108	NA	NA	NA	-3.83576	NA	NA	NA	8.4126	NA	NA	NA	NA	-22.3805	NA	NA	NA
USP37_P1P2	18.4593	NA	25.8232	NA	NA	NA	10.9862	23.2561	NA	-6.41423	NA	16.8029	NA	NA	6.66079	NA	NA	NA	NA	NA	NA	NA	NA	NA	NA	NA	NA	NA	NA	NA	NA	NA	NA	NA	NA	6.57007	NA	NA	NA	NA	NA	NA	NA	NA	NA	NA	NA	-10.898	NA
SMC5_P1P2	21.013	NA	31.8185	NA	NA	NA	29.8565	10.536	NA	NA	NA	19.5667	NA	NA	21.2792	NA	21.5619	NA	NA	NA	NA	NA	NA	NA	NA	NA	NA	NA	NA	NA	NA	NA	NA	NA	NA	NA	NA	NA	NA	NA	NA	NA	NA	NA	NA	NA	NA	NA	NA
SCO1_P1P2	28.1599	-6.0988	45.2784	NA	-6.69487	-24.4461	33.9638	NA	NA	NA	NA	49.4826	-11.1007	-24.5776	NA	NA	NA	NA	31.9953	-65.1669	-48.9833	-12.3552	-17.1615	-26.2412	-68.2053	-37.2545	32.4055	-45.0431	-82.3439	-71.7524	-68.3635	-49.6896	-45.1565	NA	NA	NA	NA	NA	NA	NA	3.4513	NA	NA	NA	NA	NA	-3.28122	-9.05223	NA
TMEM196_P1P2	1.8131	NA	NA	NA	NA	NA	NA	NA	NA	NA	NA	NA	NA	NA	NA	NA	NA	NA	NA	NA	NA	NA	NA	NA	NA	NA	NA	NA	NA	NA	NA	NA	NA	NA	NA	NA	NA	NA	NA	NA	NA	NA	1.8119	NA	NA	NA	NA	NA	NA
TPR_P1P2	4.50149	8.73747	18.4872	NA	NA	25.7403	16.6129	NA	NA	NA	NA	11.1623	7.50472	-4.3457	5.84843	NA	NA	NA	13.569	-53.9898	-54.7243	-40.8056	-28.4371	-21.3376	-38.5722	-20.7198	19.4948	-40.95	-70.6504	-71.7226	-35.5937	-48.275	-58.151	NA	-2.81082	NA	NA	NA	NA	NA	NA	NA	-5.80018	NA	NA	NA	NA	NA	NA
CCT2_P1P2	47.9576	NA	95.7849	NA	NA	NA	54.0066	26.5173	NA	NA	NA	85.0804	-5.69428	NA	NA	NA	NA	NA	NA	NA	NA	NA	NA	NA	NA	NA	NA	NA	NA	NA	NA	NA	NA	NA	NA	13.6468	-4.58505	NA	NA	NA	71.298	NA	NA	NA	NA	NA	NA	-12.1163	NA
STEAP3_P1P2	7.29527	NA	20.6444	12.3114	2.94213	NA	24.1605	-14.6868	NA	NA	NA	8.04516	NA	NA	NA	NA	NA	NA	7.63893	-21.566	-6.51798	NA	7.79172	NA	NA	NA	10.8077	-37.2023	-33.6237	-29.9622	-37.4377	-13.534	-27.2719	NA	NA	NA	NA	NA	NA	NA	NA	NA	NA	NA	NA	NA	NA	NA	NA
RHOXF2_ENST00000371388.3	3.33582	NA	4.41393	NA	-14.2924	10.1319	NA	NA	NA	23.3325	NA	NA	NA	NA	-2.91303	-1.97899	NA	6.72812	NA	NA	NA	NA	NA	NA	NA	NA	NA	NA	NA	NA	NA	NA	NA	NA	NA	NA	NA	NA	NA	NA	NA	NA	NA	NA	NA	NA	NA	NA	NA
TAF1_P1P2	34.2802	NA	40.9989	NA	NA	NA	50.3272	22.2734	NA	1.99187	NA	51.1844	-16.2644	NA	NA	NA	NA	NA	29.7317	-47.5311	-33.6411	NA	NA	-16.0561	-36.186	-36.4109	32.4051	-15.3901	-58.0346	-72.4344	-23.786	-47.8226	-47.1078	NA	NA	NA	NA	NA	NA	NA	NA	NA	NA	NA	NA	NA	NA	NA	NA
SIRT7_P1P2	13.2718	NA	35.6404	NA	NA	NA	27.0782	NA	NA	NA	NA	81.849	NA	-16.6667	NA	NA	NA	NA	NA	NA	NA	NA	NA	NA	NA	NA	NA	NA	NA	NA	NA	NA	NA	NA	NA	NA	NA	NA	NA	NA	NA	NA	NA	NA	NA	NA	-7.09465	-5.00599	NA
EIF2S1_P1P2	44.6724	NA	104.054	NA	NA	NA	52.7732	22.1237	NA	NA	NA	70.0219	NA	-5.78146	NA	NA	NA	NA	NA	NA	NA	NA	NA	NA	NA	NA	NA	NA	NA	NA	NA	NA	NA	13.5908	NA	10.8245	NA	NA	NA	NA	73.4651	NA	NA	NA	NA	NA	NA	NA	NA
NDUFS1_P1P2	8.67431	-3.88849	17.7443	NA	NA	-9.87783	10.9062	NA	NA	7.20382	NA	18.3724	NA	-8.22489	NA	NA	NA	NA	15.8487	-50.1715	-39.592	-18.4737	-7.18217	-27.3461	-47.5928	-14.8215	17.1255	-37.4749	-50.1114	-63.4302	-58.4866	-34.0493	-41.9697	NA	NA	NA	NA	NA	NA	NA	NA	NA	NA	NA	NA	NA	NA	-16.2515	NA
WDR17_P1P2	5.71862	NA	NA	NA	NA	NA	NA	NA	NA	NA	NA	12.4301	NA	NA	NA	NA	NA	NA	NA	NA	NA	NA	NA	NA	NA	NA	NA	NA	NA	NA	NA	NA	NA	NA	NA	NA	NA	NA	NA	NA	NA	NA	NA	NA	NA	NA	NA	NA	NA
PDCD2_P1P2	2.68436	NA	10.5854	NA	-4.0446	NA	7.19312	NA	NA	NA	NA	11.6158	NA	-4.99937	NA	NA	NA	NA	NA	NA	NA	NA	NA	NA	NA	NA	NA	NA	NA	NA	NA	NA	NA	NA	NA	7.01082	-3.68646	NA	NA	NA	NA	NA	NA	NA	NA	NA	NA	NA	NA
ZFP30_P1P2	5.13986	NA	NA	NA	NA	NA	NA	NA	NA	NA	NA	NA	NA	NA	NA	NA	NA	NA	NA	NA	NA	NA	NA	NA	NA	NA	NA	NA	NA	NA	NA	NA	NA	NA	NA	NA	NA	NA	NA	NA	NA	NA	NA	NA	NA	NA	NA	NA	NA
JRK_P2	1.34529	NA	NA	NA	NA	NA	NA	NA	NA	NA	NA	NA	NA	NA	NA	NA	NA	NA	NA	NA	NA	NA	NA	NA	NA	NA	NA	NA	NA	NA	NA	NA	NA	NA	NA	NA	NA	NA	NA	NA	NA	NA	NA	NA	NA	NA	NA	NA	NA
NSMCE1_P1P2	62.976	NA	83.3082	5.53303	NA	-20.8895	91.8346	17.7793	NA	NA	NA	84.2715	NA	7.81122	NA	NA	NA	NA	NA	NA	NA	NA	NA	NA	NA	NA	NA	NA	NA	NA	NA	NA	NA	45.4504	NA	8.2406	NA	NA	NA	NA	23.387	NA	-3.47179	NA	NA	NA	NA	NA	NA
LSM5_P2	2.83438	NA	16.0491	NA	NA	NA	14.2978	NA	NA	NA	NA	NA	NA	NA	NA	NA	NA	NA	NA	NA	NA	NA	NA	NA	NA	NA	NA	NA	NA	NA	NA	NA	NA	NA	NA	NA	NA	NA	NA	NA	NA	NA	NA	NA	NA	NA	NA	NA	NA
RPL15_P1P2	29.761	NA	44.6649	NA	-16.8354	NA	21.6836	18.4123	NA	NA	NA	21.008	NA	NA	NA	NA	NA	NA	NA	NA	NA	NA	NA	NA	NA	NA	NA	NA	NA	NA	NA	NA	NA	62.5744	-27.7754	15.0555	NA	NA	NA	NA	51.7615	-13.8297	2.68131	NA	NA	NA	NA	NA	NA
CIT_P1P2	42.7414	-12.4012	59.4368	NA	17.9223	-20.1049	42.9427	NA	NA	-3.48904	NA	58.6554	NA	NA	NA	NA	NA	NA	NA	NA	NA	NA	NA	NA	NA	NA	NA	NA	NA	NA	NA	NA	NA	NA	NA	NA	NA	NA	NA	NA	51.2536	NA	-1.8085	NA	NA	NA	NA	NA	NA
HMGCR_P1P2	11.1296	10.9623	24.0663	NA	9.07068	30.3887	24.2357	NA	NA	NA	NA	17.2873	NA	-1.92997	NA	NA	4.50616	NA	NA	NA	NA	NA	NA	NA	NA	NA	NA	NA	NA	NA	NA	NA	NA	NA	NA	NA	NA	NA	NA	NA	NA	NA	NA	NA	NA	NA	NA	NA	NA
MYRF_P1	2.7912	NA	NA	NA	NA	NA	NA	NA	NA	NA	NA	NA	NA	NA	NA	NA	NA	NA	NA	NA	NA	NA	NA	NA	NA	NA	NA	NA	NA	NA	NA	NA	NA	NA	NA	NA	NA	NA	NA	NA	NA	NA	NA	NA	NA	NA	NA	NA	NA
TFAM_P1P2	25.0897	-7.56306	38.2352	NA	NA	-29.2894	23.5314	NA	NA	NA	NA	71.8695	-19.3542	-13.6163	NA	NA	NA	NA	NA	NA	NA	NA	NA	NA	NA	NA	NA	NA	NA	NA	NA	NA	NA	NA	NA	NA	NA	NA	NA	NA	NA	NA	NA	NA	NA	NA	NA	NA	-10.7604
C5AR2_P1	4.90347	NA	NA	NA	NA	NA	NA	NA	NA	NA	NA	NA	NA	NA	NA	NA	NA	NA	NA	NA	NA	NA	NA	NA	NA	NA	NA	NA	NA	NA	NA	NA	NA	NA	NA	NA	NA	NA	NA	NA	NA	NA	2.81627	NA	NA	NA	NA	NA	NA
SELRC1_P1P2	6.69888	NA	5.05638	NA	3.1454	NA	15.2242	NA	NA	NA	NA	NA	NA	NA	NA	NA	NA	NA	NA	NA	NA	NA	NA	NA	NA	NA	NA	NA	NA	NA	NA	NA	NA	NA	NA	NA	NA	NA	NA	NA	NA	NA	NA	NA	NA	NA	NA	NA	NA
SERINC4_P1P2	4.03548	NA	NA	5.9462	NA	NA	NA	NA	NA	NA	NA	NA	NA	NA	NA	NA	NA	NA	NA	NA	NA	NA	NA	NA	NA	NA	NA	NA	NA	NA	NA	NA	NA	NA	NA	NA	NA	NA	NA	NA	NA	NA	1.70749	NA	NA	NA	NA	NA	NA
SLC17A1_P1P2	1.8239	NA	NA	NA	NA	NA	NA	NA	NA	NA	NA	NA	NA	NA	NA	NA	NA	NA	NA	NA	NA	NA	NA	NA	NA	NA	NA	NA	NA	NA	NA	NA	NA	NA	NA	NA	NA	NA	NA	NA	NA	NA	2.74949	NA	NA	NA	NA	NA	NA
DLD_P1P2	59.3391	NA	74.708	NA	NA	NA	54.8859	NA	NA	-23.8707	NA	74.8135	NA	-2.10623	10.2968	NA	NA	NA	NA	NA	NA	NA	NA	NA	NA	NA	NA	NA	NA	NA	NA	NA	NA	NA	NA	NA	NA	NA	NA	NA	41.3232	NA	NA	NA	NA	NA	NA	NA	NA
DENR_P1P2	12.9644	NA	15.1676	-4.6466	NA	NA	17.244	6.40524	NA	-5.45408	NA	12.5727	NA	19.599	NA	NA	4.60254	NA	NA	NA	NA	NA	NA	NA	NA	NA	NA	NA	NA	NA	NA	NA	NA	6.04695	-2.66309	NA	NA	NA	NA	NA	NA	8.07609	NA	NA	NA	NA	NA	NA	NA
COG8_P1P2	30.9864	NA	57.8368	-16.8555	NA	-8.95583	35.2424	NA	NA	3.34223	NA	64.4432	-28.8857	NA	NA	NA	NA	NA	NA	NA	NA	NA	NA	NA	NA	NA	NA	NA	NA	NA	NA	NA	NA	NA	NA	NA	-2.26692	NA	NA	NA	NA	11.4107	9.85834	NA	NA	NA	NA	NA	NA
PDRG1_P1P2	16.4413	NA	28.9368	NA	-9.71623	-7.15849	21.0636	NA	NA	NA	NA	59.0636	-4.41628	-15.563	NA	NA	NA	NA	NA	NA	NA	NA	NA	NA	NA	NA	NA	NA	NA	NA	NA	NA	NA	NA	NA	5.94692	-3.34703	NA	NA	NA	NA	NA	NA	NA	NA	NA	NA	NA	NA
C1orf131_P1P2	33.2102	NA	67.5018	NA	-13.6408	NA	43.8386	15.9733	NA	NA	NA	85.4647	NA	-15.7534	NA	NA	NA	NA	NA	NA	NA	NA	NA	NA	NA	NA	NA	NA	NA	NA	NA	NA	NA	16.9146	NA	NA	NA	NA	NA	NA	20.6966	NA	NA	NA	NA	NA	NA	NA	NA
MOB4_P1P2	20.2763	NA	10.1223	NA	NA	17.0372	NA	NA	NA	NA	NA	46.2501	9.92814	-28.8189	NA	NA	NA	NA	NA	NA	NA	NA	NA	NA	NA	NA	NA	NA	NA	NA	NA	NA	NA	NA	NA	NA	NA	NA	NA	NA	NA	NA	NA	NA	NA	NA	NA	NA	NA
PSMB2_P1P2	8.30721	NA	53.0038	16.5292	22.3197	NA	53.0146	21.2731	NA	-2.92724	NA	49.0569	NA	NA	NA	NA	NA	NA	NA	NA	NA	NA	NA	NA	NA	NA	NA	NA	NA	NA	NA	NA	NA	66.025	-15.3469	22.2953	NA	NA	NA	NA	83.7537	NA	NA	NA	NA	NA	NA	NA	NA
SNRPF_P1P2	61.3543	NA	86.097	NA	41.7955	6.3299	50.8331	12.6971	NA	NA	NA	76.4891	NA	NA	NA	NA	NA	NA	NA	NA	NA	NA	NA	NA	NA	NA	NA	NA	NA	NA	NA	NA	NA	84.6377	NA	11.9628	NA	NA	NA	NA	111.95	NA	NA	NA	NA	NA	NA	NA	NA
EXOSC9_P1P2	15.124	NA	19.0512	8.47293	NA	NA	18.1231	NA	NA	-6.52838	NA	18.3869	NA	-3.52384	NA	NA	NA	NA	13.0353	-45.3335	-35.1	NA	-3.63126	-21.0423	-65.5428	-33.3076	35.3758	-64.1763	-89.9768	-64.7061	-62.1371	-42.3855	-66.0812	NA	NA	NA	NA	NA	NA	NA	102.521	NA	NA	NA	NA	NA	NA	NA	NA
NDUFS5_P1	15.8564	-11.2811	26.0399	NA	NA	-19.0222	28.1297	NA	NA	2.65142	NA	18.5571	3.49849	-4.35498	21.7842	NA	NA	NA	11.4935	-44.1008	-32.0774	-17.8082	-14.724	-21.6671	-57.0283	NA	13.8202	-34.4868	-45.404	-56.1385	-50.6523	-28.3316	-33.9505	14.2907	NA	NA	NA	NA	NA	NA	4.3841	NA	4.03071	NA	NA	-14.4028	NA	-17.3591	NA
AKAP17A_P1P2	2.04611	NA	NA	NA	NA	-9.64171	NA	NA	NA	NA	NA	NA	NA	NA	NA	NA	NA	NA	NA	NA	NA	NA	NA	NA	NA	NA	NA	NA	NA	NA	NA	NA	NA	NA	NA	2.33547	NA	NA	NA	NA	NA	NA	NA	NA	NA	NA	-1.78278	NA	NA
RSL1D1_P1	26.1129	NA	33.8157	NA	NA	NA	15.3908	15.6326	NA	1.83865	NA	28.5373	-3.84569	NA	NA	NA	NA	NA	NA	NA	NA	NA	NA	NA	NA	NA	NA	NA	NA	NA	NA	NA	NA	15.9384	NA	5.46164	NA	NA	NA	NA	38.016	NA	NA	NA	NA	NA	NA	NA	NA
BET1_P1P2	21.6238	NA	46.0021	NA	NA	NA	16.5198	7.72787	NA	NA	NA	62.3473	-19.9018	-10.1689	NA	NA	NA	NA	NA	NA	NA	NA	NA	NA	NA	NA	NA	NA	NA	NA	NA	NA	NA	NA	NA	NA	-3.80002	NA	NA	NA	NA	NA	NA	NA	NA	NA	NA	NA	NA
PTCD3_P1P2	42.1299	NA	64.6712	NA	NA	-26.3864	39.3787	NA	NA	NA	NA	71.1074	NA	-11.8385	NA	NA	NA	NA	NA	NA	NA	NA	NA	NA	NA	NA	NA	NA	NA	NA	NA	NA	NA	NA	NA	NA	NA	NA	NA	NA	NA	NA	NA	NA	NA	NA	NA	NA	NA
DDX6_P1P2	8.14701	NA	9.06189	27.0469	NA	NA	11.7672	NA	NA	-16.109	NA	19.6241	NA	-5.78361	5.16019	NA	NA	NA	NA	NA	NA	NA	NA	NA	NA	NA	NA	NA	NA	NA	NA	NA	NA	8.8191	NA	NA	NA	NA	NA	NA	20.5848	-6.95734	NA	NA	NA	NA	NA	NA	NA
CRIM1_P1P2	1.50109	NA	NA	NA	NA	NA	NA	NA	NA	NA	NA	NA	NA	NA	NA	NA	7.02143	NA	NA	NA	NA	NA	NA	NA	NA	NA	NA	NA	NA	NA	NA	NA	NA	NA	NA	NA	NA	NA	NA	NA	NA	NA	NA	NA	NA	NA	NA	NA	NA
ZNF687_P1P2	2.43204	NA	5.43994	NA	-3.11501	NA	NA	NA	NA	NA	NA	6.86009	3.68322	-4.6044	NA	NA	NA	NA	NA	NA	NA	NA	NA	NA	NA	NA	NA	NA	NA	NA	NA	NA	NA	NA	NA	NA	NA	NA	NA	NA	NA	NA	NA	NA	NA	NA	NA	NA	NA
RPLP1_P1P2	29.9629	NA	47.3429	NA	9.57459	9.91305	20.8071	17.0624	NA	NA	NA	21.7072	NA	NA	NA	NA	NA	NA	NA	NA	NA	NA	NA	NA	NA	NA	NA	NA	NA	NA	NA	NA	NA	NA	NA	19.7015	-13.1837	NA	NA	NA	13.0319	NA	NA	NA	NA	NA	NA	-6.8236	NA
CSNK1A1_P1P2	8.1344	NA	22.2358	NA	NA	NA	13.7352	NA	NA	NA	NA	15.743	NA	-6.97222	NA	NA	NA	NA	NA	NA	NA	NA	NA	NA	NA	NA	NA	NA	NA	NA	NA	NA	NA	NA	NA	NA	NA	NA	NA	NA	NA	NA	NA	NA	NA	NA	NA	NA	NA
MRPL9_P1P2	13.5408	-4.13915	33.8699	NA	NA	-20.9164	22.2887	NA	NA	NA	NA	38.9098	NA	-8.39543	NA	NA	NA	NA	20.9662	-63.9951	-45.7043	-15.7667	-11.7986	-24.6612	-69.2189	-38.5031	25.8634	-42.112	-59.3885	-66.0062	-60.1951	-32.6752	-47.9279	NA	NA	NA	-2.95932	NA	NA	NA	NA	NA	NA	NA	NA	NA	-10.5316	-40.3436	NA
IARS_P1P2	23.8481	NA	31.9392	NA	NA	NA	19.1817	NA	NA	NA	NA	17.8766	NA	-6.0137	NA	NA	NA	NA	NA	NA	NA	NA	NA	NA	NA	NA	NA	NA	NA	NA	NA	NA	NA	NA	NA	4.58704	-4.70659	NA	NA	NA	NA	NA	NA	NA	NA	NA	NA	-5.80044	NA
LAS1L_P1P2	31.7027	-9.17481	47.58	NA	-4.84354	-27.5895	30.9025	NA	NA	NA	NA	11.2666	-1.92347	-3.50879	NA	NA	NA	NA	NA	NA	NA	NA	NA	NA	NA	NA	NA	NA	NA	NA	NA	NA	NA	NA	NA	4.95072	-2.38471	NA	NA	NA	25.3044	NA	NA	NA	NA	NA	NA	NA	NA
RPL13_P1P2	31.5931	NA	67.5547	NA	-13.2574	NA	31.239	12.884	NA	NA	NA	63.264	NA	NA	NA	NA	NA	NA	NA	NA	NA	NA	NA	NA	NA	NA	NA	NA	NA	NA	NA	NA	NA	NA	NA	6.78406	NA	NA	NA	NA	NA	NA	NA	NA	NA	NA	NA	NA	NA
GAPDH_P1	7.3879	NA	12.6684	NA	NA	-3.85375	20.717	NA	NA	NA	NA	NA	NA	NA	NA	NA	NA	NA	NA	NA	NA	NA	NA	NA	NA	NA	NA	NA	NA	NA	NA	NA	NA	NA	NA	NA	NA	NA	NA	NA	NA	NA	NA	NA	NA	6.94647	NA	NA	NA
GTF3C6_P1P2	17.1575	NA	38.5542	NA	NA	-16.6913	47.0809	NA	NA	-2.61415	NA	56.3614	-2.18922	NA	NA	NA	NA	NA	NA	NA	NA	NA	NA	NA	NA	NA	NA	NA	NA	NA	NA	NA	NA	NA	NA	NA	NA	NA	NA	NA	NA	NA	NA	NA	NA	NA	NA	NA	NA
DOHH_P1P2	13.8992	NA	24.0315	NA	-28.5731	NA	6.97125	NA	NA	NA	NA	25.4476	NA	-23.4139	NA	NA	NA	NA	NA	NA	NA	NA	NA	NA	NA	NA	NA	NA	NA	NA	NA	NA	NA	NA	NA	NA	NA	NA	NA	NA	NA	NA	NA	NA	NA	NA	NA	NA	NA
RPL30_P1P2	44.9568	NA	95.4272	NA	NA	NA	53.4366	NA	NA	NA	NA	78.2953	NA	-1.19515	NA	NA	NA	NA	NA	NA	NA	NA	NA	NA	NA	NA	NA	NA	NA	NA	NA	NA	NA	NA	NA	13.242	NA	NA	NA	NA	91.1232	NA	NA	NA	NA	NA	NA	NA	NA
LGALS9B_ENST00000324290.5	1.23417	NA	NA	NA	NA	NA	NA	NA	NA	NA	NA	NA	NA	NA	NA	NA	NA	NA	NA	NA	NA	NA	NA	NA	NA	NA	NA	NA	NA	NA	NA	NA	NA	NA	NA	NA	NA	NA	NA	NA	NA	NA	NA	NA	NA	NA	NA	NA	NA
NUDT21_P1P2	46.4935	NA	89.912	NA	NA	NA	30.5495	39.7932	NA	NA	NA	80.2714	NA	NA	NA	NA	NA	NA	46.71	-35.0528	NA	4.35894	NA	-14.9764	-42.8828	-22.5545	51.8287	NA	NA	-46.2457	NA	-32.2381	-33.7223	NA	NA	NA	NA	NA	NA	NA	25.0667	NA	-2.96283	NA	NA	NA	NA	NA	NA
KRI1_P1P2	9.32265	NA	NA	NA	NA	NA	NA	NA	NA	1.33043	NA	NA	NA	NA	NA	NA	NA	NA	NA	NA	NA	NA	NA	NA	NA	NA	NA	NA	NA	NA	NA	NA	NA	NA	NA	NA	NA	NA	NA	NA	NA	NA	NA	NA	NA	NA	NA	NA	NA
MAX_P1P2	26.241	-14.0988	25.6314	NA	-16.3314	-8.70314	21.8339	NA	NA	NA	NA	39.9289	7.04517	-7.9652	NA	NA	NA	NA	31.8688	-77.7976	-48.9177	-38.4508	-33.0933	-40.3741	-93.3747	-51.6063	34.7018	-36.0218	-63.9496	-52.7508	-90.0831	-67.8777	-66.8741	NA	NA	NA	NA	NA	NA	NA	NA	NA	NA	NA	NA	NA	NA	NA	-3.95729
ZW10_P1P2	26.3906	NA	22.9536	NA	NA	NA	20.4101	NA	NA	NA	NA	52.3221	NA	-30.6724	NA	NA	NA	NA	NA	NA	NA	NA	NA	NA	NA	NA	NA	NA	NA	NA	NA	NA	NA	NA	NA	NA	NA	NA	NA	NA	NA	NA	NA	NA	NA	NA	NA	NA	NA
BOP1_P1	27.2013	NA	76.4451	NA	NA	NA	70.2888	NA	NA	NA	NA	88.5927	NA	-8.58549	NA	NA	NA	NA	NA	NA	NA	NA	NA	NA	NA	NA	NA	NA	NA	NA	NA	NA	NA	NA	NA	NA	NA	NA	NA	NA	33.0848	NA	NA	NA	NA	NA	NA	NA	NA
C12orf55_P1P2	2.3495	NA	NA	NA	NA	NA	NA	NA	NA	NA	NA	NA	NA	NA	NA	NA	NA	NA	NA	NA	NA	NA	NA	NA	NA	NA	NA	NA	NA	NA	NA	NA	NA	NA	NA	NA	NA	NA	NA	NA	NA	NA	NA	NA	NA	NA	NA	NA	NA
ATP5C1_P1P2	31.255	-5.04941	47.1024	NA	NA	NA	28.5677	NA	NA	3.30277	NA	77.6203	NA	-9.10635	NA	NA	NA	19.2263	NA	NA	NA	NA	NA	NA	NA	NA	NA	NA	NA	NA	NA	NA	NA	NA	NA	NA	NA	NA	NA	NA	NA	NA	2.78279	NA	NA	NA	NA	-9.47832	NA
UQCRC2_P1P2	18.1984	NA	33.4904	NA	NA	-4.40495	19.7097	NA	NA	NA	NA	47.855	NA	-10.9246	NA	23.7529	NA	NA	NA	NA	NA	NA	NA	NA	NA	NA	NA	NA	NA	NA	NA	NA	NA	NA	NA	NA	NA	NA	NA	NA	NA	NA	NA	NA	NA	NA	NA	NA	NA
EXOC3_P1P2	6.08912	NA	19.0908	NA	NA	-2.90134	8.69629	NA	NA	NA	NA	14.1934	NA	NA	NA	NA	NA	NA	NA	NA	NA	NA	NA	NA	NA	NA	NA	NA	NA	NA	NA	NA	NA	NA	NA	NA	-4.1857	NA	NA	NA	NA	NA	NA	NA	NA	NA	NA	NA	NA
SLC7A1_P1P2	36.1774	-6.50597	49.1379	11.9403	-27.8233	-14.1248	39.4475	NA	2.56931	6.33337	NA	61.239	-7.356	-17.3484	13.34	NA	NA	NA	35.0768	-76.8854	-67.3232	-18.0564	-30.9376	-38.267	-91.7265	-71.947	34.3674	-56.6872	-88.597	-94.1622	-82.2155	-36.7822	-82.9698	NA	NA	NA	NA	NA	NA	NA	NA	NA	NA	NA	NA	NA	NA	NA	NA
GPR162_P1P2	7.57738	NA	6.87462	NA	14.8392	NA	NA	NA	NA	NA	NA	9.56714	4.36032	-2.0542	NA	NA	NA	NA	NA	NA	NA	NA	NA	NA	NA	NA	NA	NA	NA	NA	NA	NA	NA	NA	NA	NA	NA	NA	NA	NA	NA	NA	NA	NA	NA	NA	NA	NA	NA
MRPS12_P1P2	43.5682	-8.0273	47.3817	NA	NA	-31.1244	31.4357	5.90326	NA	20.2723	NA	70.0883	NA	-12.228	NA	NA	NA	NA	38.2846	-80.2496	-58.9752	-19.3117	-19.3611	-35.6155	-89.5134	-62.4873	35.4176	-56.1045	-67.822	-88.0587	-73.9193	-40.0883	-58.8084	9.69649	-4.69912	NA	-4.75772	NA	NA	NA	9.58429	NA	1.95198	NA	NA	NA	-11.2676	-14.8808	NA
ZNHIT3_P1P2	3.71772	NA	NA	NA	NA	-5.21522	NA	NA	NA	NA	NA	13.8091	NA	-5.72006	NA	NA	NA	NA	NA	NA	NA	NA	NA	NA	NA	NA	NA	NA	NA	NA	NA	NA	NA	NA	NA	6.41638	-9.04243	NA	NA	NA	NA	NA	NA	NA	NA	NA	NA	NA	NA
POLR2L_P1P2	7.18977	NA	9.32257	NA	NA	NA	NA	NA	NA	NA	NA	NA	NA	NA	NA	NA	NA	NA	NA	NA	NA	NA	NA	NA	NA	NA	NA	NA	NA	NA	NA	NA	NA	NA	NA	NA	NA	NA	NA	NA	NA	NA	NA	NA	NA	NA	NA	NA	NA
KANSL3_P1P2	18.041	7.53554	57.6119	-13.0638	14.7675	21.8104	49.4811	24.3169	NA	-4.3812	NA	58.7523	NA	NA	8.6657	NA	NA	NA	NA	NA	NA	NA	NA	NA	NA	NA	NA	NA	NA	NA	NA	NA	NA	69.8178	-43.803	8.03596	NA	NA	NA	NA	78.3634	NA	NA	NA	NA	NA	NA	NA	NA
NAA25_P1P2	28.0195	NA	34.7886	3.82996	12.1509	NA	36.1051	NA	NA	NA	NA	38.4884	NA	NA	NA	NA	NA	NA	NA	NA	NA	NA	NA	NA	NA	NA	NA	NA	NA	NA	NA	NA	NA	NA	NA	5.87832	NA	NA	NA	NA	NA	NA	NA	NA	NA	NA	NA	11.9624	NA
PSPH_P2	20.3444	NA	34.4165	NA	NA	NA	34.8501	2.05688	NA	NA	NA	53.9716	-4.51055	-9.25551	2.28258	NA	NA	NA	26.9867	-21.0761	-1.26875	-3.81617	NA	NA	-3.97756	NA	37.786	-24.4835	NA	-35.078	NA	-9.70581	-14.9659	NA	NA	NA	NA	NA	NA	NA	NA	NA	NA	NA	NA	NA	NA	NA	NA
SFPQ_P1P2	21.9277	NA	35.9328	NA	NA	NA	19.9447	6.80979	NA	1.4769	NA	20.6547	NA	-2.51107	NA	NA	NA	NA	NA	NA	NA	NA	NA	NA	NA	NA	NA	NA	NA	NA	NA	NA	NA	5.20383	NA	4.16185	-2.72361	NA	NA	NA	NA	NA	NA	NA	NA	NA	NA	NA	4.70876
WDR46_P1P2	35.7847	NA	56.6092	35.4487	-14.8013	NA	40.1025	14.0701	NA	2.36477	NA	67.4263	-6.33043	-11.9667	NA	NA	NA	NA	NA	NA	NA	NA	NA	NA	NA	NA	NA	NA	NA	NA	NA	NA	NA	NA	NA	4.32806	NA	NA	NA	NA	35.7666	-3.48634	NA	NA	NA	NA	NA	NA	NA
OGFOD1_P1P2	24.5505	NA	35.8276	NA	NA	NA	27.0408	16.1484	NA	NA	NA	26.9635	NA	-11.0308	NA	NA	NA	NA	26.4241	-38.8099	-3.64956	NA	NA	-14.0521	-40.5447	-24.4358	27.6635	-8.02462	NA	-57.0647	-15.9334	-51.4917	-30.7772	NA	NA	NA	NA	NA	NA	NA	NA	NA	NA	NA	NA	NA	-2.71383	-2.00922	NA
MRPS16_P1P2	37.7736	-15.4256	34.5708	NA	4.73883	-23.8853	39.796	NA	NA	4.44184	NA	47.9725	-4.00214	-22.6857	NA	NA	NA	NA	28.0074	-62.2248	-41.0547	-18.2145	-12.147	-26.4988	-69.2942	-44.6291	27.3452	-41.5371	-49.0781	-63.192	-57.0142	-30.339	-41.9098	NA	NA	NA	NA	NA	NA	NA	NA	NA	NA	NA	NA	NA	-6.23709	-22.7416	NA
RSRC2_P1P2	2.70362	NA	8.3251	NA	NA	NA	5.60561	NA	NA	NA	NA	9.38382	NA	NA	NA	NA	NA	NA	NA	NA	NA	NA	NA	NA	NA	NA	NA	NA	NA	NA	NA	NA	NA	19.1142	NA	NA	NA	NA	NA	NA	18.5889	NA	NA	NA	NA	NA	NA	NA	NA
NPC2_P1P2	17.1162	-13.1693	13.6308	NA	NA	-8.93352	37.9643	NA	NA	NA	NA	43.0013	-2.66454	-11.3208	NA	NA	NA	NA	6.34779	-19.7007	-9.30347	NA	NA	-12.5958	-13.7764	NA	18.3994	NA	-10.211	-33.5901	-25.16	-16.1348	-11.8226	NA	NA	NA	NA	NA	NA	NA	NA	NA	NA	NA	NA	NA	NA	-5.75835	NA
THOC7_P1P2	25.5075	NA	34.3341	NA	10.6496	NA	29.1406	NA	NA	NA	NA	54.3831	NA	-10.5706	NA	NA	NA	NA	NA	NA	NA	NA	NA	NA	NA	NA	NA	NA	NA	NA	NA	NA	NA	NA	NA	NA	-1.77643	NA	NA	NA	NA	NA	NA	NA	NA	NA	NA	NA	NA
RAD9A_P1P2	8.3989	NA	9.75649	NA	NA	NA	11.208	13.8458	NA	-2.95758	NA	32.1708	-10.8659	NA	5.36053	NA	NA	NA	NA	NA	NA	NA	NA	NA	NA	NA	NA	NA	NA	NA	NA	NA	NA	4.96999	NA	12.147	NA	NA	NA	NA	36.4207	NA	NA	NA	NA	NA	NA	NA	NA
EXOSC7_P1P2	2.42294	NA	NA	NA	NA	NA	6.51614	NA	NA	NA	NA	NA	NA	NA	NA	NA	NA	NA	NA	NA	NA	NA	NA	NA	NA	NA	NA	NA	NA	NA	NA	NA	NA	NA	NA	NA	NA	NA	NA	NA	NA	NA	NA	NA	NA	NA	NA	NA	NA
CYLD_P1P2	4.67952	17.4855	20.7377	NA	NA	35.8924	5.3951	-3.01018	-10.8409	NA	NA	7.36539	NA	NA	NA	NA	NA	NA	NA	NA	NA	NA	NA	NA	NA	NA	NA	NA	NA	NA	NA	NA	NA	11.4381	-9.8164	NA	NA	NA	NA	NA	NA	NA	NA	NA	NA	NA	NA	NA	NA
PHF5A_P1P2	20.0277	NA	46.5004	NA	23.4168	NA	41.1655	NA	NA	NA	NA	28.151	NA	-9.92985	NA	NA	NA	NA	NA	NA	NA	NA	NA	NA	NA	NA	NA	NA	NA	NA	NA	NA	NA	36.7074	NA	NA	NA	NA	NA	NA	86.0639	NA	NA	NA	NA	NA	NA	NA	NA
NAE1_P1P2	17.5175	NA	NA	NA	-3.98939	NA	25.9794	NA	NA	NA	NA	68.5253	-39.1881	-13.3375	NA	-4.47273	NA	NA	NA	NA	NA	NA	NA	NA	NA	NA	NA	NA	NA	NA	NA	NA	NA	NA	NA	NA	-3.3304	NA	NA	NA	NA	NA	NA	NA	NA	NA	NA	NA	-8.1086
IPO13_P1P2	61.8539	-3.22986	109.221	NA	NA	-8.50429	82.5372	6.40301	NA	NA	NA	99.7383	-14.1404	-18.4382	NA	NA	NA	NA	NA	NA	NA	NA	NA	NA	NA	NA	NA	NA	NA	NA	NA	NA	NA	22.1096	NA	16.9261	NA	NA	NA	NA	14.4274	NA	NA	NA	NA	NA	NA	NA	NA
ALYREF_P1P2	7.8394	NA	22.0478	NA	17.4945	NA	12.2995	NA	NA	NA	NA	17.1982	NA	NA	NA	NA	NA	NA	NA	NA	NA	NA	NA	NA	NA	NA	NA	NA	NA	NA	NA	NA	NA	NA	-1.70135	NA	NA	NA	NA	NA	36.5402	NA	NA	NA	NA	NA	NA	NA	NA
SMAP2_P1	1.70277	NA	NA	NA	NA	NA	NA	NA	NA	NA	NA	NA	NA	NA	NA	NA	NA	NA	NA	NA	NA	NA	NA	NA	NA	NA	NA	NA	NA	NA	NA	NA	NA	NA	NA	NA	NA	NA	NA	NA	NA	NA	NA	NA	NA	NA	NA	NA	NA
MRPL16_P1P2	34.3499	-5.41559	54.0971	NA	NA	-28.6466	63.1544	NA	7.05046	16.3728	NA	57.7844	NA	-10.1239	NA	NA	NA	NA	NA	NA	NA	NA	NA	NA	NA	NA	NA	NA	NA	NA	NA	NA	NA	NA	NA	NA	-8.75845	NA	NA	NA	26.1178	-3.83963	NA	NA	NA	NA	-22.3882	-8.26274	NA
SHD_P1P2	1.59687	NA	NA	NA	NA	NA	NA	NA	NA	NA	NA	NA	NA	NA	NA	NA	NA	NA	NA	NA	NA	NA	NA	NA	NA	NA	NA	NA	NA	NA	NA	NA	NA	NA	NA	NA	NA	NA	NA	NA	NA	NA	NA	NA	NA	NA	NA	NA	NA
SOS1_P1P2	8.14957	24.4201	20.1631	NA	-7.14931	38.5863	18.7557	NA	NA	NA	NA	11.6174	23.372	-6.2917	19.1272	NA	12.0271	NA	26.3138	-70.8126	-69.5089	-70.2408	-50.5639	-37.3	-88.0606	-66.6893	27.7918	-56.0271	-95.1318	-104.542	-78.5011	-58.4991	-71.0512	NA	NA	3.45696	NA	NA	NA	NA	NA	NA	NA	NA	NA	NA	NA	NA	NA
PDSS2_P1P2	17.9063	-5.47021	27.5968	NA	NA	-11.3755	27.603	NA	NA	NA	NA	21.0932	-2.62871	-8.05334	NA	NA	NA	NA	22.3295	-44.3835	-42.2029	-21.6857	-18.4668	-23.5507	-48.6709	-22.835	25.8852	-39.9748	-57.8157	-108.35	-60.1576	-35.3117	-34.9105	7.27499	-6.62636	NA	NA	NA	NA	NA	NA	NA	NA	NA	NA	NA	-3.01928	NA	NA
IMP4_P1P2	45.8562	NA	78.8531	NA	-7.48704	-3.47199	40.1237	37.6275	NA	8.03046	NA	76.2017	NA	-6.42007	NA	NA	NA	NA	NA	NA	NA	NA	NA	NA	NA	NA	NA	NA	NA	NA	NA	NA	NA	69.1159	-12.7161	10.2463	-10.1075	NA	NA	NA	99.786	NA	2.57534	NA	NA	NA	NA	NA	NA
ASCL4_ENST00000342331.4	5.84719	NA	NA	NA	NA	NA	NA	NA	NA	NA	NA	NA	NA	NA	NA	NA	NA	NA	NA	NA	NA	NA	NA	NA	NA	NA	NA	NA	NA	NA	NA	NA	NA	NA	NA	NA	NA	NA	NA	NA	NA	NA	NA	NA	NA	NA	NA	NA	NA
MRPL48_P1P2	31.9691	-7.46342	45.6183	NA	NA	-30.1972	48.9102	NA	NA	NA	NA	60.0773	NA	-9.73506	10.0251	NA	NA	NA	NA	NA	NA	NA	NA	NA	NA	NA	NA	NA	NA	NA	NA	NA	NA	NA	NA	2.42152	-2.29921	NA	NA	NA	6.25579	NA	NA	NA	NA	NA	-10.3345	-18.8294	NA
SNRPB_P1P2	52.1138	NA	97.9312	NA	12.0568	NA	33.7745	NA	NA	NA	NA	75.2991	NA	NA	NA	NA	NA	NA	NA	NA	NA	NA	NA	NA	NA	NA	NA	NA	NA	NA	NA	NA	NA	NA	NA	15.3065	NA	NA	NA	NA	NA	NA	NA	NA	NA	NA	NA	NA	NA
LRCH3_P1P2	2.37338	NA	NA	NA	NA	NA	NA	NA	NA	NA	NA	NA	NA	NA	NA	NA	NA	NA	NA	NA	NA	NA	NA	NA	NA	NA	NA	NA	NA	NA	NA	NA	NA	NA	NA	NA	NA	NA	NA	NA	NA	NA	2.91096	NA	NA	NA	NA	NA	NA
MED7_P1P2	58.1467	NA	104.67	NA	NA	NA	53.8414	NA	4.82125	27.3032	NA	92.6527	NA	-50.6429	NA	NA	NA	NA	45.4744	-57.3429	-56.1958	-42.1381	-37.4814	-36.2497	-80.9271	-58.1888	48.1424	-31.6832	-76.7523	-75.7385	-56.5216	-44.145	-62.2316	NA	-4.75598	NA	NA	NA	NA	NA	NA	NA	NA	NA	NA	NA	NA	NA	NA
MRPS23_P1P2	36.346	NA	68.7694	NA	NA	-28.2956	58.3788	NA	NA	10.1428	NA	78.4902	NA	-12.7064	NA	NA	NA	NA	40.7664	-79.8205	-57.2088	-13.4826	-12.8622	-31.0696	-101.794	-64.3742	37.9099	-40.2008	-73.2008	-67.0943	-73.7327	-46.3318	-65.5714	3.18698	NA	NA	-7.63725	NA	NA	NA	17.3987	NA	NA	NA	NA	NA	-6.01303	-28.3583	NA
BBX_P1P2	2.15215	NA	NA	NA	NA	NA	NA	NA	NA	NA	NA	NA	NA	NA	NA	NA	NA	NA	NA	NA	NA	NA	NA	NA	NA	NA	NA	NA	NA	NA	NA	NA	NA	NA	NA	NA	NA	NA	NA	NA	NA	NA	NA	NA	NA	NA	NA	NA	NA
SURF6_P1P2	41.2487	NA	70.3799	NA	-7.36158	NA	35.1639	22.6368	NA	2.43357	NA	63.7366	-6.74507	NA	NA	NA	NA	NA	NA	NA	NA	NA	NA	NA	NA	NA	NA	NA	NA	NA	NA	NA	NA	10.4407	-10.8964	10.3547	NA	NA	NA	NA	82.0048	NA	NA	NA	NA	NA	NA	NA	NA
MRPL11_P1P2	21.2512	-12.6158	42.2314	NA	NA	-19.0896	32.0426	NA	NA	3.86033	NA	60.3505	NA	-13.5323	NA	NA	NA	NA	NA	NA	NA	NA	NA	NA	NA	NA	NA	NA	NA	NA	NA	NA	NA	NA	NA	NA	-9.32077	NA	NA	NA	9.55181	NA	NA	NA	NA	NA	-11.6729	-15.8007	NA
ECSIT_P1P2	20.5491	-11.0063	26.7507	NA	NA	-13.5172	19.7624	NA	NA	0.956872	NA	36.0801	NA	-5.80571	NA	NA	NA	NA	8.17574	-45.3669	-32.3168	-21.0426	-13.7449	-20.8741	-60.4172	-14.6125	14.5702	-29.8808	-42.9903	-50.4593	-52.8712	-31.9211	-35.0553	NA	NA	NA	-5.00387	NA	NA	NA	4.33031	NA	NA	NA	NA	NA	-4.82548	-5.06992	NA
TIMM23_ENST00000260867.4	30.4642	-9.13886	62.071	5.95598	NA	-21.9093	31.8811	NA	NA	NA	NA	56.0881	-3.77982	-24.9157	NA	NA	NA	NA	32.8285	-40.2585	-30.9389	NA	NA	-18.3069	-39.6236	-31.322	34.065	-30.5003	-45.923	-49.9173	-38.9399	-23.158	-34.0431	NA	NA	NA	NA	NA	NA	NA	NA	NA	4.65956	NA	NA	NA	-6.71608	NA	NA
TIMM23B_P1P2	30.4642	-9.13886	62.071	4.70161	NA	-21.9093	31.8811	NA	NA	2.4909	NA	56.0881	-3.77982	-24.9157	NA	-6.22669	NA	NA	31.2737	-40.2585	-30.9389	NA	NA	-18.3648	-43.42	-33.8698	33.153	-30.5003	-45.923	-49.9173	-38.9399	-23.158	-34.0431	NA	NA	NA	NA	NA	NA	NA	NA	NA	NA	NA	NA	NA	NA	NA	NA
TUT1_P1	4.89826	NA	5.43997	NA	29.0989	NA	5.97984	3.65353	NA	NA	NA	15.9097	-19.2109	NA	NA	NA	NA	NA	NA	NA	NA	NA	NA	NA	NA	NA	NA	NA	NA	NA	NA	NA	NA	NA	NA	NA	NA	NA	NA	NA	67.8426	NA	NA	NA	NA	NA	NA	NA	NA
RARS_P1P2	40.2727	NA	77.0921	NA	NA	NA	36.9489	18.3652	NA	NA	NA	59.8171	NA	-11.1224	NA	NA	NA	NA	NA	NA	NA	NA	NA	NA	NA	NA	NA	NA	NA	NA	NA	NA	NA	NA	NA	NA	NA	NA	NA	NA	NA	NA	NA	NA	NA	NA	NA	NA	NA
NOL8_P1P2	36.317	-5.99382	53.6666	NA	-4.66	-3.08726	31.1434	NA	NA	NA	NA	65.0616	NA	NA	NA	NA	NA	NA	NA	NA	NA	NA	NA	NA	NA	NA	NA	NA	NA	NA	NA	NA	NA	NA	NA	6.48358	NA	NA	NA	NA	15.522	NA	NA	NA	NA	NA	NA	NA	NA
PAFAH1B1_P1P2	22.4539	NA	22.4414	NA	NA	NA	13.1224	31.5146	NA	NA	NA	16.123	NA	-7.47787	NA	NA	NA	NA	16.9264	7.91552	NA	56.2882	32.0199	NA	-1.9895	-2.46999	23.5131	10.3546	13.9512	-38.1998	15.9865	-46.2983	NA	NA	NA	NA	NA	NA	NA	NA	NA	NA	NA	NA	NA	NA	NA	NA	NA
NDUFA8_P1P2	33.9652	-21.1999	44.7685	NA	NA	-31.0239	48.3862	NA	NA	15.8128	NA	52.0521	NA	-10.3557	NA	NA	NA	NA	21.8289	-59.9222	-41.8022	-29.4431	-19.2526	-27.745	-75.7687	-39.9529	20.7554	-45.4848	-52.1835	-69.3074	-67.4637	-39.0856	-49.0234	NA	NA	NA	NA	NA	NA	NA	18.7339	NA	8.06713	NA	NA	-13.6407	NA	-16.3151	NA
DHX15_P1P2	49.5573	NA	82.6584	NA	18.0918	NA	46.6271	16.5664	NA	-2.95544	NA	90.1627	NA	NA	NA	NA	5.471	NA	NA	NA	NA	NA	NA	NA	NA	NA	NA	NA	NA	NA	NA	NA	NA	NA	-3.08586	10.8342	NA	NA	NA	NA	69.6395	NA	NA	NA	NA	NA	-4.42229	NA	NA
SEC13_P1P2	35.2008	NA	89.0905	NA	29.1487	NA	38.3341	NA	NA	-1.82471	NA	60.0087	NA	NA	NA	NA	NA	NA	NA	NA	NA	NA	NA	NA	NA	NA	NA	NA	NA	NA	NA	NA	NA	17.4668	NA	9.79904	-3.31018	NA	NA	NA	75.8097	NA	NA	NA	NA	NA	NA	NA	NA
ASNA1_P1P2	32.079	NA	43.6477	-2.30639	-4.86903	-19.7401	30.44	-4.03567	NA	2.26725	NA	23.4359	-15.4677	-7.32988	NA	NA	NA	NA	30.2271	-49.8788	-48.6816	-11.0424	-25.3788	-24.2004	-60.6994	-51.9666	31.4561	-47.2258	-68.4774	-70.5746	-47.2285	-26.9072	-54.6725	NA	NA	NA	NA	NA	NA	NA	NA	12.1812	4.5886	NA	NA	10.3511	NA	NA	NA
C12orf57_P1P2	1.61923	NA	NA	NA	NA	NA	NA	-6.19094	NA	NA	NA	NA	NA	NA	NA	NA	NA	NA	NA	NA	NA	NA	NA	NA	NA	NA	NA	NA	NA	NA	NA	NA	NA	NA	NA	NA	NA	NA	NA	NA	NA	NA	NA	NA	NA	NA	NA	NA	NA
MEAF6_P1P2	5.92161	NA	21.5969	-2.37389	-5.89857	-3.81752	14.4858	3.96732	9.10092	-5.32766	NA	13.5359	8.13898	NA	NA	NA	NA	NA	NA	NA	NA	NA	NA	NA	NA	NA	NA	NA	NA	NA	NA	NA	NA	2.21642	NA	NA	NA	NA	NA	NA	8.08322	NA	NA	NA	NA	NA	NA	NA	NA
MRPL19_P1P2	49.0497	NA	62.2911	NA	4.73359	-30.0802	44.9261	NA	NA	3.84915	NA	67.3196	NA	-11.9551	NA	NA	NA	NA	40.2145	-76.5796	-52.7708	-14.2027	-4.85806	-27.8745	-83.2167	-50.2693	40.7169	-38.4781	-62.373	-74.223	-71.6297	-43.4935	-64.3913	NA	NA	NA	NA	NA	NA	NA	NA	NA	NA	NA	NA	NA	-7.16477	-25.4475	NA
RPF2_P1P2	54.7907	NA	60.013	NA	-22.6418	NA	46.6844	12.8395	NA	NA	NA	33.9623	NA	NA	NA	NA	NA	NA	NA	NA	NA	NA	NA	NA	NA	NA	NA	NA	NA	NA	NA	NA	NA	NA	NA	8.25698	-5.88898	NA	NA	NA	32.7802	-4.0235	NA	NA	NA	NA	NA	NA	NA
MTIF2_P1P2	11.3316	-4.91321	14.0907	NA	NA	-11.5676	16.8007	NA	NA	NA	NA	16.3202	NA	NA	NA	NA	NA	NA	NA	NA	NA	NA	NA	NA	NA	NA	NA	NA	NA	NA	NA	NA	NA	NA	NA	NA	-2.14542	NA	NA	NA	NA	NA	NA	NA	NA	NA	-12.6734	-13.9844	NA
MRPS10_P1P2	23.4939	-10.6605	45.8457	3.61077	NA	-26.6805	27.0791	NA	NA	6.89983	NA	58.6619	NA	-24.6595	NA	NA	NA	NA	23.6233	-68.9531	-44.5238	-12.7707	-9.80304	-28.1081	-78.0514	-39.5972	29.0237	-37.5251	-54.9246	-59.998	-66.7189	-39.3517	-50.7253	NA	NA	NA	NA	NA	NA	NA	NA	NA	NA	NA	NA	NA	-8.04597	-40.9582	NA
PGAM1_P1P2	6.15712	NA	5.03499	NA	NA	NA	6.8443	-14.8221	NA	NA	NA	9.62431	3.28281	-5.84928	NA	NA	NA	NA	18.4732	-42.8467	-35.1647	-6.49859	-12.0466	-19.4686	-42.0053	-17.2667	20.1111	-52.6205	-61.4926	-93.3328	-42.6492	-25.0438	-52.8968	NA	NA	NA	NA	NA	NA	NA	NA	NA	NA	NA	NA	NA	NA	NA	NA
MTG1_P1P2	5.94924	NA	9.37789	NA	NA	-8.74002	8.19671	NA	NA	NA	NA	39.7264	-5.36613	-6.85038	NA	NA	NA	NA	NA	NA	NA	NA	NA	NA	NA	NA	NA	NA	NA	NA	NA	NA	NA	NA	NA	NA	NA	NA	NA	NA	NA	NA	NA	NA	NA	NA	-14.9125	-19.7804	NA
UQCC1_P1P2	4.41429	NA	1.06044	NA	NA	-2.5397	6.07235	NA	NA	NA	NA	NA	NA	NA	8.88717	30.9671	8.60593	NA	7.74486	-22.2571	-17.4369	NA	-3.66839	NA	-14.4062	NA	8.79925	-14.1024	-21.1826	NA	-26.2844	-14.1193	NA	NA	NA	NA	NA	NA	NA	NA	NA	NA	NA	NA	NA	NA	-2.33756	NA	NA
PSMD7_P1P2	38.8979	NA	69.077	37.1936	43.5635	5.98628	50.0452	51.0937	NA	-11.0962	NA	55.6591	NA	-10.9957	NA	NA	NA	NA	39.4048	-60.5818	-54.5783	-18.5508	-19.8799	-20.2326	-52.8141	-64.5341	40.4257	-10.8218	-71.3931	-60.489	-38.0035	NA	-50.607	52.3112	-6.84082	35.2646	NA	NA	NA	NA	101.052	NA	NA	NA	NA	NA	NA	NA	NA
TRRAP_P1P2	32.9922	NA	67.4689	7.23776	-17.1315	-12.3908	42.1792	NA	NA	NA	NA	57.4958	NA	-18.5088	21.8088	NA	9.07049	NA	41.972	-83.8673	-57.2157	NA	NA	-35.3953	-88.3721	-57.3682	41.2415	-40.6908	-57.0901	-101.07	-69.1082	-60.112	-91.0019	NA	NA	NA	NA	NA	NA	NA	NA	NA	NA	NA	NA	NA	-3.07079	-7.49706	NA
MRPL20_P1P2	10.5774	NA	17.8874	NA	NA	-10.1237	NA	NA	NA	NA	NA	20.4096	NA	-2.95558	NA	NA	NA	NA	NA	NA	NA	NA	NA	NA	NA	NA	NA	NA	NA	NA	NA	NA	NA	NA	NA	NA	NA	NA	NA	NA	NA	NA	NA	NA	NA	NA	-6.94353	-5.79538	NA
BDP1_P1P2	27.671	-5.95456	72.1733	NA	NA	-22.7322	41.352	NA	NA	NA	NA	21.3371	-8.65794	-10.5537	NA	NA	NA	NA	NA	NA	NA	NA	NA	NA	NA	NA	NA	NA	NA	NA	NA	NA	NA	NA	NA	NA	NA	NA	NA	NA	NA	NA	NA	NA	NA	NA	NA	NA	NA
SLC25A42_P1P2	5.61785	NA	11.7664	NA	NA	NA	NA	NA	NA	NA	NA	NA	NA	NA	NA	NA	NA	NA	NA	NA	NA	NA	NA	NA	NA	NA	NA	NA	NA	NA	NA	NA	NA	NA	NA	NA	NA	NA	NA	NA	NA	NA	NA	NA	NA	NA	NA	NA	NA
MRPS21_P1P2	49.2932	-11.5784	62.818	NA	NA	-24.9678	64.518	NA	NA	18.5631	NA	76.8037	NA	-7.73436	NA	NA	NA	NA	42.166	-76.5175	-64.1206	-21.8361	-15.6771	-33.2173	-101.8	-67.2021	42.8842	-35.9319	-57.8821	-64.4715	-75.9431	-46.4387	-51.3631	3.62818	NA	NA	-2.19066	NA	NA	NA	25.3836	NA	NA	NA	NA	NA	-8.45795	-35.7549	NA
MTOR_P1P2	59.7189	NA	109.973	NA	NA	NA	47.1603	NA	5.27192	7.52	NA	105.056	NA	-14.7283	NA	NA	NA	NA	NA	NA	NA	NA	NA	NA	NA	NA	NA	NA	NA	NA	NA	NA	NA	5.50206	NA	6.86597	-3.3045	NA	NA	NA	NA	NA	NA	NA	NA	15.7437	NA	NA	NA
MNT_P1P2	3.9514	5.82062	2.91825	NA	21.8913	9.60752	NA	NA	NA	NA	NA	NA	NA	NA	NA	NA	NA	NA	NA	NA	NA	NA	NA	NA	NA	NA	NA	NA	NA	NA	NA	NA	NA	NA	NA	NA	NA	NA	NA	NA	NA	NA	NA	NA	NA	NA	NA	NA	-6.71274
ZFHX2_P2	4.42597	NA	NA	NA	NA	NA	NA	NA	NA	NA	NA	NA	NA	NA	NA	NA	NA	NA	NA	NA	NA	NA	NA	NA	NA	NA	NA	NA	NA	NA	NA	NA	NA	NA	NA	NA	NA	NA	NA	NA	NA	NA	NA	NA	NA	NA	NA	NA	NA
WDR13_P1P2	4.28921	NA	NA	NA	NA	NA	NA	NA	NA	NA	NA	NA	NA	NA	NA	NA	NA	NA	NA	NA	NA	NA	NA	NA	NA	NA	NA	NA	NA	NA	NA	NA	NA	NA	NA	NA	NA	NA	NA	NA	NA	NA	NA	NA	NA	NA	NA	NA	NA
DLGAP5_P1P2	2.15211	NA	1.89839	NA	19.6037	NA	NA	NA	NA	NA	NA	NA	NA	NA	NA	NA	NA	NA	NA	15.6027	23.8354	73.6493	44.6167	28.0955	67.4462	30.4199	1.76883	3.97628	26.0625	NA	80.2251	77.0474	39.5191	NA	NA	NA	NA	NA	NA	NA	19.3899	5.16898	NA	NA	NA	NA	NA	NA	NA
RPS7_P1P2	29.9231	NA	80.8674	8.06952	NA	4.89612	41.3386	7.00702	3.68062	NA	NA	40.2494	NA	NA	NA	NA	NA	NA	NA	NA	NA	NA	NA	NA	NA	NA	NA	NA	NA	NA	NA	NA	NA	NA	NA	NA	NA	NA	NA	NA	12.7986	NA	NA	NA	NA	NA	NA	NA	NA
DPH6_P1P2	21.6511	NA	29.9627	-33.6191	NA	-7.3818	33.973	NA	NA	NA	NA	37.5663	NA	-6.68911	55.5024	NA	6.17547	NA	NA	NA	NA	NA	NA	NA	NA	NA	NA	NA	NA	NA	NA	NA	NA	NA	NA	NA	NA	NA	NA	NA	NA	NA	NA	NA	NA	NA	NA	NA	NA
AATF_P1P2	22.869	-16.6376	46.5935	NA	-20.2083	-11.8152	43.5372	25.2449	NA	1.53669	NA	52.9351	-5.63499	NA	NA	NA	NA	NA	NA	NA	NA	NA	NA	NA	NA	NA	NA	NA	NA	NA	NA	NA	NA	NA	NA	9.00341	NA	NA	NA	NA	3.47595	NA	NA	NA	NA	NA	NA	NA	NA
RTTN_P1P2	27.889	NA	39.8392	NA	NA	NA	30.8882	10.1326	NA	NA	NA	43.2365	NA	-9.19942	4.4263	NA	7.78675	NA	NA	NA	NA	NA	NA	NA	NA	NA	NA	NA	NA	NA	NA	NA	NA	NA	NA	NA	NA	NA	NA	NA	NA	NA	NA	NA	NA	NA	NA	NA	NA
RPS26_P1P2	21.3988	NA	45.8101	NA	-2.19716	NA	17.2505	8.68863	NA	NA	NA	53.5252	NA	-7.62097	NA	NA	NA	NA	NA	NA	NA	NA	NA	NA	NA	NA	NA	NA	NA	NA	NA	NA	NA	NA	NA	10.4968	-5.30865	NA	NA	NA	69.5753	NA	NA	NA	NA	NA	NA	NA	NA
RFC5_P1P2	15.4917	NA	29.7528	NA	NA	NA	18.1722	NA	NA	-4.3859	NA	21.4509	NA	-28.6969	NA	NA	NA	NA	NA	NA	NA	NA	NA	NA	NA	NA	NA	NA	NA	NA	NA	NA	NA	NA	NA	8.54786	NA	NA	NA	NA	7.79128	NA	-2.77947	NA	NA	NA	NA	NA	NA
RPS17_ENST00000330339.7	10.7847	NA	39.0269	NA	NA	NA	16.1033	NA	NA	NA	NA	16.5983	NA	NA	NA	NA	NA	NA	NA	NA	NA	NA	NA	NA	NA	NA	NA	NA	NA	NA	NA	NA	NA	NA	NA	NA	NA	NA	NA	NA	NA	NA	NA	NA	NA	NA	NA	NA	NA
DDX10_P1P2	19.4364	-5.18982	44.5071	NA	-24.9222	-11.1407	21.693	15.6211	NA	2.4469	NA	49.4935	NA	NA	NA	NA	NA	NA	NA	NA	NA	NA	NA	NA	NA	NA	NA	NA	NA	NA	NA	NA	NA	NA	NA	NA	NA	NA	NA	NA	32.2584	NA	NA	NA	NA	NA	NA	NA	NA
SEC24A_P1P2	1.23724	NA	NA	NA	NA	NA	NA	NA	NA	NA	NA	NA	NA	NA	NA	NA	NA	NA	NA	NA	NA	NA	NA	NA	NA	NA	NA	NA	NA	NA	NA	NA	NA	NA	NA	NA	NA	NA	NA	NA	NA	NA	NA	NA	NA	NA	-5.08178	NA	NA
BRIX1_P1P2	25.5156	NA	42.6404	NA	NA	NA	17.9002	NA	NA	NA	NA	59.5754	NA	-3.83397	NA	NA	NA	NA	NA	NA	NA	NA	NA	NA	NA	NA	NA	NA	NA	NA	NA	NA	NA	NA	NA	5.88003	NA	NA	NA	NA	28.5542	NA	NA	NA	NA	NA	NA	-25.8868	NA
PPIE_P1P2	37.0704	NA	51.6296	4.09173	28.1419	NA	41.6788	28.7967	NA	-5.93873	NA	57.7267	NA	NA	NA	NA	NA	NA	NA	NA	NA	NA	NA	NA	NA	NA	NA	NA	NA	NA	NA	NA	NA	36.0812	-21.529	NA	NA	NA	NA	NA	56.8215	NA	NA	NA	NA	NA	NA	NA	NA
WDHD1_P1P2	8.25871	NA	12.643	14.9416	NA	-4.67584	12.2561	38.2452	1.58615	-5.88897	NA	18.9341	-18.2574	37.7555	NA	NA	NA	NA	NA	NA	NA	NA	NA	NA	NA	NA	NA	NA	NA	NA	NA	NA	NA	NA	NA	7.34264	NA	NA	NA	NA	36.5181	NA	-5.74986	NA	NA	NA	-4.4179	NA	NA
SLC25A3_P1P2	5.50364	NA	19.3406	NA	NA	NA	NA	NA	NA	NA	NA	17.007	NA	-6.70931	NA	NA	NA	NA	NA	NA	NA	NA	NA	NA	NA	NA	NA	NA	NA	NA	NA	NA	NA	NA	NA	NA	NA	NA	NA	NA	NA	NA	NA	NA	NA	NA	-3.70724	NA	NA
LSM2_P1P2	57.7487	NA	84.7326	NA	14.6677	NA	44.0473	13.3163	NA	NA	NA	78.7678	NA	NA	NA	NA	NA	NA	NA	NA	NA	NA	NA	NA	NA	NA	NA	NA	NA	NA	NA	NA	NA	80.8536	NA	19.2132	NA	NA	NA	NA	108.461	NA	NA	NA	NA	NA	NA	NA	NA
ENHO_P1P2	3.69284	NA	NA	NA	NA	NA	NA	NA	NA	NA	NA	NA	NA	NA	NA	NA	NA	NA	NA	NA	NA	NA	NA	NA	NA	NA	NA	NA	NA	NA	NA	NA	NA	NA	NA	NA	NA	NA	NA	NA	NA	NA	2.08445	NA	NA	NA	NA	NA	NA
TLK2_P1P2	5.14002	NA	6.17126	NA	NA	NA	2.05568	NA	NA	NA	NA	7.67349	NA	NA	NA	NA	NA	NA	NA	NA	NA	NA	NA	NA	NA	NA	NA	NA	NA	NA	NA	NA	NA	NA	NA	NA	NA	NA	NA	NA	NA	NA	NA	NA	NA	13.8998	NA	NA	NA
DDX47_P1P2	24.5381	NA	114.035	NA	NA	NA	24.6019	20.866	4.82489	NA	NA	91.5694	NA	NA	NA	NA	NA	NA	NA	NA	NA	NA	NA	NA	NA	NA	NA	NA	NA	NA	NA	NA	NA	72.6603	NA	9.72563	-3.34021	NA	NA	NA	60.245	NA	NA	NA	NA	NA	NA	NA	NA
UTP18_P1P2	10.3325	NA	15.824	NA	NA	NA	8.12954	6.25203	NA	NA	NA	39.722	-2.07887	NA	NA	NA	NA	NA	NA	NA	NA	NA	NA	NA	NA	NA	NA	NA	NA	NA	NA	NA	NA	NA	NA	NA	NA	NA	NA	NA	NA	NA	NA	NA	NA	NA	NA	NA	NA
NDUFB2_P1P2	32.3564	-11.7231	34.6153	NA	NA	-8.24473	35.5401	NA	NA	5.8095	NA	37.5314	6.68313	-6.78626	NA	NA	NA	NA	13.3126	-55.1586	-41.1291	-30.2025	-19.5488	-27.9233	-70.3533	-29.9739	17.8256	-43.177	-55.1336	-69.1764	-64.2495	-34.654	-48.0548	NA	NA	NA	-3.40489	NA	NA	NA	5.65103	NA	NA	NA	NA	NA	NA	NA	-24.7147
HGS_P1P2	5.13587	NA	11.7283	4.30946	NA	NA	21.4108	NA	NA	NA	NA	25.8271	-13.587	NA	NA	NA	NA	NA	NA	NA	NA	NA	NA	NA	NA	NA	NA	NA	NA	NA	NA	NA	NA	NA	NA	NA	NA	NA	NA	NA	3.11581	NA	NA	NA	NA	NA	NA	NA	NA
FAM178A_P1P2	13.351	-3.31539	13.8568	NA	NA	NA	17.4912	10.7072	NA	NA	NA	12.8753	NA	18.3165	19.0396	NA	9.57305	NA	NA	NA	NA	NA	NA	NA	NA	NA	NA	NA	NA	NA	NA	NA	NA	NA	NA	NA	NA	NA	NA	NA	NA	NA	NA	NA	NA	NA	NA	NA	NA
MRPL41_P1P2	15.9806	NA	42.5012	NA	NA	-17.9375	28.2526	NA	NA	3.96119	NA	61.8977	NA	NA	NA	NA	NA	NA	NA	NA	NA	NA	NA	NA	NA	NA	NA	NA	NA	NA	NA	NA	NA	NA	-2.48357	NA	-4.42179	NA	NA	NA	2.42772	NA	NA	NA	NA	NA	NA	NA	-21.379
PPWD1_P1P2	32.9811	NA	44.9126	NA	NA	NA	25.1189	NA	NA	NA	NA	53.3902	-7.8798	-4.40928	NA	NA	NA	NA	NA	NA	NA	NA	NA	NA	NA	NA	NA	NA	NA	NA	NA	NA	NA	NA	-4.51378	NA	NA	NA	NA	NA	NA	NA	NA	NA	NA	NA	NA	NA	NA
SETDB1_P1P2	4.01291	NA	10.9046	NA	-9.03916	14.3189	11.5796	13.6977	-10.6316	-5.50059	NA	8.70068	NA	-17.3297	NA	NA	NA	NA	NA	NA	NA	NA	NA	NA	NA	NA	NA	NA	NA	NA	NA	NA	NA	NA	NA	NA	NA	NA	NA	NA	NA	NA	NA	NA	NA	NA	NA	NA	-13.3461
MVK_P1P2	9.53642	NA	20.7427	NA	NA	-5.34785	20.5767	NA	NA	NA	NA	21.5032	-24.0467	-5.2742	NA	NA	NA	NA	NA	NA	NA	NA	NA	NA	NA	NA	NA	NA	NA	NA	NA	NA	NA	NA	NA	NA	NA	NA	NA	NA	NA	NA	NA	NA	NA	NA	NA	NA	NA
MDN1_P1P2	32.6251	NA	52.0464	NA	NA	-12.0554	33.9933	16.8018	NA	NA	NA	50.8066	-9.75514	NA	NA	NA	NA	NA	NA	NA	NA	NA	NA	NA	NA	NA	NA	NA	NA	NA	NA	NA	NA	30.9992	NA	10.5426	NA	NA	NA	NA	NA	NA	NA	NA	NA	NA	NA	NA	NA
TNRC6C_P1P2	1.24369	NA	NA	NA	NA	NA	NA	NA	NA	NA	NA	NA	NA	NA	NA	NA	NA	NA	NA	NA	NA	NA	NA	NA	NA	NA	NA	NA	NA	NA	NA	NA	NA	NA	NA	NA	NA	NA	NA	NA	NA	NA	NA	NA	NA	NA	NA	NA	NA
TPT1_P1P2	4.18471	NA	NA	NA	-2.98815	NA	3.30782	NA	NA	NA	NA	NA	NA	NA	NA	NA	NA	NA	NA	NA	NA	NA	NA	NA	NA	NA	NA	NA	NA	NA	NA	NA	NA	NA	NA	NA	NA	NA	NA	NA	NA	NA	NA	NA	NA	NA	3.05067	NA	NA
SHOC2_P1P2	5.34509	9.53461	NA	NA	-3.4433	21.1437	4.66009	8.43798	NA	NA	NA	NA	NA	NA	6.664	NA	11.5685	NA	10.3116	-33.9906	-49.288	-49.8892	-41.0258	-17.9306	-44.8543	-35.8926	10.1391	-25.902	-61.8197	-51.7642	-31.3754	-40.7837	-38.3121	NA	NA	NA	-1.76328	NA	NA	NA	NA	13.0711	NA	NA	NA	NA	NA	NA	NA
ZNHIT1_P1P2	12.5609	NA	11.0774	NA	NA	NA	10.2136	NA	NA	NA	NA	53.4424	NA	-3.36044	NA	NA	NA	NA	NA	NA	NA	NA	NA	NA	NA	NA	NA	NA	NA	NA	NA	NA	NA	NA	NA	NA	NA	NA	NA	NA	NA	NA	NA	NA	NA	NA	NA	NA	NA
CCDC136_P1P2	2.85353	NA	NA	NA	NA	NA	NA	NA	NA	NA	NA	NA	NA	NA	NA	NA	NA	NA	NA	NA	NA	NA	NA	NA	NA	NA	NA	NA	NA	NA	NA	NA	NA	NA	NA	NA	NA	NA	NA	NA	NA	NA	NA	NA	NA	NA	NA	NA	NA
RPL27A_P1P2	37.1127	NA	73.7214	NA	NA	NA	59.9602	23.4888	NA	NA	NA	36.0791	NA	NA	NA	NA	NA	NA	NA	NA	NA	NA	NA	NA	NA	NA	NA	NA	NA	NA	NA	NA	NA	10.6497	NA	10.2757	NA	NA	NA	NA	83.3848	NA	NA	NA	NA	NA	NA	NA	NA
DHX29_P1P2	31.0346	NA	56.2247	NA	-5.45389	NA	35.0467	NA	NA	NA	NA	21.9753	NA	NA	NA	NA	NA	NA	33.183	-43.0913	-37.732	6.6572	NA	-14.8356	-46.9099	-36.648	30.1723	-42.1608	-47.3519	-48.388	-40.1627	-18.0419	-45.1088	NA	NA	NA	NA	NA	NA	NA	NA	NA	NA	NA	NA	NA	-3.27077	-10.0014	NA
SNRPD1_P1P2	56.8552	NA	106.267	NA	37.2451	NA	71.7401	45.5144	NA	-7.25652	NA	82.3139	NA	-5.39369	NA	NA	NA	NA	NA	NA	NA	NA	NA	NA	NA	NA	NA	NA	NA	NA	NA	NA	NA	16.1424	NA	10.6444	NA	NA	NA	NA	67.6691	NA	NA	NA	NA	NA	NA	NA	NA
TFCP2L1_P1P2	11.269	NA	42.546	NA	NA	NA	17.9419	NA	NA	NA	NA	92.5928	NA	NA	NA	NA	NA	NA	NA	NA	NA	NA	NA	NA	NA	NA	NA	NA	NA	NA	NA	NA	NA	NA	NA	NA	NA	NA	NA	NA	17.7411	NA	NA	NA	NA	NA	NA	NA	NA
FNBP4_P1P2	3.74923	-11.0863	20.6131	NA	17.6128	-26.4359	8.15945	NA	NA	NA	NA	10.2478	NA	-6.29001	NA	NA	NA	NA	NA	NA	NA	NA	NA	NA	NA	NA	NA	NA	NA	NA	NA	NA	NA	NA	NA	NA	NA	NA	NA	NA	12.3649	NA	NA	NA	NA	NA	NA	NA	NA
TSN_P1P2	1.35901	NA	NA	NA	NA	NA	NA	NA	NA	NA	NA	NA	NA	NA	NA	NA	NA	NA	NA	NA	NA	NA	NA	NA	NA	NA	NA	NA	NA	NA	NA	NA	NA	NA	NA	NA	NA	NA	NA	NA	NA	NA	NA	NA	NA	NA	NA	NA	NA
MCM3AP_P1P2	7.2581	NA	17.2117	NA	NA	NA	9.33368	45.377	NA	NA	NA	20.1278	19.992	-10.2155	NA	NA	NA	NA	NA	NA	NA	NA	NA	NA	NA	NA	NA	NA	NA	NA	NA	NA	NA	NA	NA	NA	NA	NA	NA	NA	NA	NA	NA	NA	NA	NA	NA	NA	NA
SNRNP48_P1P2	27.677	NA	65.5445	NA	20.929	NA	42.1058	NA	NA	NA	NA	59.9934	NA	-3.83045	NA	NA	NA	NA	NA	NA	NA	NA	NA	NA	NA	NA	NA	NA	NA	NA	NA	NA	NA	NA	NA	NA	NA	NA	NA	NA	NA	NA	NA	NA	NA	NA	NA	NA	NA
GNPAT_P1P2	15.2969	NA	57.6887	NA	-21.1105	-14.2277	50.7293	NA	NA	1.76062	NA	61.3696	NA	-11.8341	NA	NA	NA	NA	NA	NA	NA	NA	NA	NA	NA	NA	NA	NA	NA	NA	NA	NA	NA	NA	NA	NA	NA	NA	NA	NA	NA	NA	-5.14795	NA	NA	NA	NA	NA	NA
RNASEK_P1P2	30.1712	19.6979	57.9979	-4.75038	24.3847	27.857	37.5056	11.3925	NA	NA	NA	59.0353	NA	NA	NA	NA	NA	NA	NA	NA	NA	NA	NA	NA	NA	NA	NA	NA	NA	NA	NA	NA	NA	1.91532	NA	NA	NA	NA	NA	NA	11.9164	NA	5.67927	NA	NA	NA	NA	NA	NA
C17orf49_P1	30.1712	13.1261	57.9979	-7.85775	24.3847	27.857	37.5056	15.0337	NA	NA	NA	59.0353	NA	NA	NA	NA	NA	NA	NA	NA	NA	NA	NA	NA	NA	NA	NA	NA	NA	NA	NA	NA	NA	1.55455	NA	2.74846	NA	NA	NA	NA	19.902	NA	NA	NA	NA	NA	NA	NA	NA
ZNF644_P1P2	2.42368	NA	3.65518	NA	-11.5589	4.5079	NA	NA	NA	NA	NA	4.12094	11.9229	-1.40415	NA	NA	NA	NA	NA	NA	NA	NA	NA	NA	NA	NA	NA	NA	NA	NA	NA	NA	NA	NA	NA	NA	NA	NA	NA	NA	NA	NA	NA	NA	NA	NA	NA	NA	NA
GINS1_P1P2	65.969	NA	121.915	NA	15.4666	NA	94.2485	16.7505	NA	-24.4823	NA	92.7757	NA	-6.84467	NA	NA	NA	NA	NA	NA	NA	NA	NA	NA	NA	NA	NA	NA	NA	NA	NA	NA	NA	NA	NA	20.13	NA	NA	NA	NA	53.5068	NA	-16.0666	NA	NA	NA	NA	NA	NA
NDUFA6_P1P2	20.5119	-5.56277	20.6471	NA	8.04676	-3.06469	10.3354	5.45605	NA	NA	NA	15.2546	8.68217	-3.48747	NA	NA	NA	NA	11.6426	-45.9543	-35.3176	-14.1698	-9.78813	-17.699	-58.1293	-11.5396	14.317	-33.9548	-40.2219	-50.5981	-49.663	-28.8866	-35.8987	NA	NA	NA	NA	NA	NA	NA	NA	NA	NA	NA	NA	-4.94324	NA	-8.29261	NA
ZC3H13_P1P2	7.765	6.59625	NA	8.29622	NA	NA	5.92308	-8.33147	NA	NA	NA	NA	NA	NA	NA	NA	NA	NA	NA	NA	NA	NA	NA	NA	NA	NA	NA	NA	NA	NA	NA	NA	NA	NA	-5.88162	-1.99731	NA	NA	NA	NA	NA	NA	NA	NA	NA	NA	NA	NA	NA
METAP2_P1P2	10.4005	NA	20.8676	NA	-11.2931	NA	23.5576	NA	NA	3.06667	NA	19.999	-27.2198	-5.2116	6.46102	NA	NA	NA	17.0786	-52.9613	-3.76672	-19.3271	3.88915	-20.2776	-51.8525	-27.9126	16.4963	NA	NA	-36.0507	-8.19327	-46.4729	-42.4538	NA	NA	NA	-2.3695	NA	NA	NA	NA	NA	NA	NA	NA	13.6919	-1.30673	-9.47512	NA
COA5_P1P2	4.43792	NA	20.1112	NA	NA	NA	5.27872	NA	NA	NA	NA	13.3588	NA	-2.51982	8.0682	NA	NA	NA	NA	NA	NA	NA	NA	NA	NA	NA	NA	NA	NA	NA	NA	NA	NA	3.63246	-3.66126	NA	NA	NA	NA	NA	5.30017	NA	NA	NA	NA	NA	-2.99822	NA	NA
TXNDC17_P1P2	2.79825	NA	NA	NA	NA	NA	NA	NA	NA	2.30272	NA	6.0364	NA	-3.16942	NA	NA	NA	NA	NA	NA	NA	NA	NA	NA	NA	NA	NA	NA	NA	NA	NA	NA	NA	NA	NA	NA	-5.56465	NA	NA	NA	NA	NA	NA	NA	NA	NA	NA	NA	NA
TNPO3_P1P2	10.1877	NA	19.1329	13.3423	NA	NA	30.2466	NA	6.33075	-13.9111	NA	20.5259	-20.8862	NA	17.7805	22.5397	NA	NA	NA	NA	NA	NA	NA	NA	NA	NA	NA	NA	NA	NA	NA	NA	NA	NA	NA	NA	NA	NA	NA	NA	NA	NA	NA	NA	NA	NA	NA	NA	NA
STEAP1B_P1P2	5.79229	NA	NA	NA	NA	NA	NA	NA	NA	NA	NA	NA	NA	NA	NA	NA	NA	NA	NA	NA	NA	NA	NA	NA	NA	NA	NA	NA	NA	NA	NA	NA	NA	NA	NA	NA	NA	NA	NA	NA	NA	NA	NA	NA	NA	NA	NA	NA	NA
GPR176_P1P2	6.33565	NA	NA	NA	NA	NA	NA	NA	NA	NA	NA	NA	NA	NA	NA	NA	NA	NA	NA	NA	NA	NA	NA	NA	NA	NA	NA	NA	NA	NA	NA	NA	NA	NA	NA	NA	NA	NA	NA	NA	NA	NA	2.07764	NA	NA	NA	NA	NA	NA
DDB1_P1	7.52039	NA	NA	NA	NA	NA	NA	25.9708	NA	NA	NA	NA	NA	NA	NA	NA	NA	NA	NA	NA	NA	NA	NA	NA	NA	NA	NA	NA	NA	NA	NA	NA	NA	NA	NA	NA	NA	NA	NA	NA	NA	NA	NA	NA	NA	NA	NA	NA	NA
C14orf2_P1P2	30.5828	NA	42.717	NA	6.1868	-7.6872	24.3989	NA	NA	9.47785	NA	43.3552	NA	-10.0799	NA	NA	NA	31.9686	NA	NA	NA	NA	NA	NA	NA	NA	NA	NA	NA	NA	NA	NA	NA	NA	NA	NA	NA	NA	NA	NA	NA	NA	NA	NA	NA	NA	-4.67429	-3.56472	NA
GMPS_P1P2	7.92815	NA	18.8338	NA	NA	NA	7.58388	NA	NA	NA	NA	17.6253	NA	-6.20149	NA	NA	NA	NA	NA	NA	NA	NA	NA	NA	NA	NA	NA	NA	NA	NA	NA	NA	NA	NA	NA	NA	NA	NA	NA	NA	NA	NA	NA	NA	NA	NA	NA	NA	NA
UBE4B_P1P2	2.09905	NA	3.93751	NA	-1.64429	3.2944	NA	-18.019	NA	3.16588	NA	6.18888	NA	NA	NA	NA	NA	NA	NA	NA	NA	NA	NA	NA	NA	NA	NA	NA	NA	NA	NA	NA	NA	NA	NA	NA	NA	NA	NA	NA	NA	NA	NA	NA	NA	NA	NA	NA	NA
IK_P1	40.7453	NA	53.2814	NA	14.79	NA	43.9434	31.7011	NA	-8.09683	NA	23.6984	NA	-1.27146	NA	NA	NA	NA	NA	NA	NA	NA	NA	NA	NA	NA	NA	NA	NA	NA	NA	NA	NA	NA	NA	11.0561	NA	NA	NA	NA	29.5217	NA	NA	NA	NA	NA	NA	NA	NA
PCF11_P1P2	31.2541	NA	49.5425	-30.8055	7.66349	5.90861	19.8275	6.68927	NA	NA	NA	52.5388	NA	NA	NA	NA	NA	NA	NA	NA	NA	NA	NA	NA	NA	NA	NA	NA	NA	NA	NA	NA	NA	NA	NA	NA	NA	NA	NA	NA	NA	NA	NA	NA	NA	NA	NA	NA	NA
PSTK_P1	4.57165	NA	NA	NA	NA	3.95387	2.18668	NA	NA	NA	NA	NA	NA	NA	NA	NA	NA	NA	NA	NA	NA	NA	NA	NA	NA	NA	NA	NA	NA	NA	NA	NA	NA	NA	NA	17.508	NA	NA	NA	NA	NA	NA	-2.6243	NA	NA	NA	NA	NA	NA
PHOX2B_P1P2	6.87147	NA	NA	NA	NA	NA	NA	NA	NA	NA	NA	NA	NA	NA	NA	NA	NA	NA	NA	NA	NA	NA	NA	NA	NA	NA	NA	NA	NA	NA	NA	NA	NA	NA	NA	NA	NA	NA	NA	NA	NA	NA	NA	NA	NA	NA	NA	NA	NA
COLQ_P1P2	2.82565	NA	NA	NA	NA	NA	NA	NA	NA	NA	NA	NA	NA	NA	NA	NA	NA	NA	NA	NA	NA	NA	NA	NA	NA	NA	NA	NA	NA	NA	NA	NA	NA	NA	NA	NA	NA	NA	NA	NA	NA	NA	NA	NA	NA	NA	NA	NA	NA
QARS_P1P2	64.7057	NA	76.473	4.21321	19.7334	NA	78.3298	NA	NA	3.32184	NA	96.3642	NA	-10.6719	NA	NA	NA	NA	46.2108	-32.523	-22.7561	NA	NA	-9.24708	-31.9218	-19.1407	42.1333	NA	-42.3764	-42.8564	-35.4395	NA	-25.3341	NA	NA	21.5935	-11.4706	NA	NA	NA	84.2075	6.77454	NA	NA	NA	NA	NA	NA	NA
TRMT10C_P1P2	54.3972	-7.3461	73.8922	NA	NA	-43.4974	67.2737	10.7471	NA	12.9176	NA	90.8573	NA	-20.7597	NA	NA	NA	NA	41.5634	-72.9729	-64.58	-21.5621	-5.47142	-29.0855	-81.1101	-53.9924	40.171	-44.1997	-57.5489	-78.3071	-62.518	-38.2757	-57.1304	NA	NA	NA	-0.865623	NA	NA	NA	30.933	NA	2.37035	NA	NA	NA	-4.15532	-8.75059	NA
ZNF622_P1P2	20.4204	-14.0911	28.1859	NA	NA	-15.2576	18.4713	NA	NA	NA	NA	10.8139	NA	-3.19458	NA	NA	NA	NA	NA	NA	NA	NA	NA	NA	NA	NA	NA	NA	NA	NA	NA	NA	NA	NA	NA	NA	NA	NA	NA	NA	NA	NA	NA	NA	NA	NA	NA	NA	NA
ESF1_P1	63.7856	NA	110.958	NA	-20.3104	NA	67.5105	45.4006	NA	7.76812	NA	102.494	NA	-15.7914	NA	NA	NA	NA	44.9207	-30.0735	-35.5635	NA	5.65375	-8.79882	-18.6747	-23.7443	46.1341	NA	-15.1575	-25.4986	-16.2601	NA	NA	NA	NA	NA	NA	NA	NA	NA	95.901	NA	NA	NA	NA	NA	NA	NA	NA
RPLP2_P1P2	28.3036	NA	37.8001	NA	NA	NA	20.5674	NA	NA	NA	NA	26.5816	NA	NA	NA	NA	NA	NA	NA	NA	NA	NA	NA	NA	NA	NA	NA	NA	NA	NA	NA	NA	NA	NA	NA	8.05015	NA	NA	NA	NA	NA	NA	NA	NA	NA	NA	NA	NA	NA
MYSM1_P1P2	5.08217	NA	10.2407	38.5405	-15.905	NA	11.1822	NA	NA	1.38187	NA	3.14138	NA	-5.13488	NA	NA	NA	NA	NA	NA	NA	NA	NA	NA	NA	NA	NA	NA	NA	NA	NA	NA	NA	NA	NA	NA	NA	NA	NA	NA	NA	NA	NA	NA	NA	NA	NA	NA	NA
TTI2_P1P2	35.4388	-7.05276	38.2457	NA	-8.59818	-9.20378	27.7397	NA	NA	NA	NA	45.1451	-3.11674	-25.2904	NA	NA	NA	NA	36.1381	-76.732	-49.9513	NA	-6.7441	-26.55	-73.4998	-46.2867	33.0314	-44.8359	-53.4292	-77.7487	-63.2849	-46.0407	-60.5591	NA	NA	NA	NA	NA	NA	NA	NA	NA	NA	NA	NA	NA	NA	NA	NA
ADD1_P1P2	1.35447	NA	NA	NA	NA	NA	NA	NA	NA	NA	NA	NA	NA	NA	NA	NA	NA	NA	NA	NA	NA	NA	NA	NA	NA	NA	NA	NA	NA	NA	NA	NA	NA	NA	NA	NA	NA	NA	NA	NA	NA	NA	NA	NA	NA	NA	NA	NA	NA
EIF4E_P1P2	44.9338	NA	61.9585	NA	31.4868	NA	34.3414	NA	NA	13.8094	NA	61.2433	NA	-5.04392	NA	NA	NA	NA	NA	NA	NA	NA	NA	NA	NA	NA	NA	NA	NA	NA	NA	NA	NA	NA	NA	5.00216	NA	NA	NA	NA	NA	NA	NA	NA	NA	NA	5.23962	NA	NA
TAF9_P1P2	11.6125	NA	13.8708	NA	NA	NA	13.9831	17.8937	NA	NA	NA	15.0525	-14.6211	NA	NA	NA	NA	NA	NA	NA	NA	NA	NA	NA	NA	NA	NA	NA	NA	NA	NA	NA	NA	NA	NA	NA	NA	NA	NA	NA	NA	NA	NA	NA	NA	NA	NA	NA	NA
SNRPA1_P1P2	21.7359	NA	27.7851	NA	NA	NA	28.1431	NA	NA	NA	NA	17.0126	-3.07867	-18.5726	NA	NA	NA	NA	NA	NA	NA	NA	NA	NA	NA	NA	NA	NA	NA	NA	NA	NA	NA	NA	NA	7.00686	NA	NA	NA	NA	30.171	NA	NA	NA	NA	NA	NA	NA	NA
DLG1_P1P2	2.02136	NA	NA	NA	NA	NA	NA	NA	NA	NA	NA	NA	NA	NA	NA	NA	NA	NA	NA	NA	NA	NA	NA	NA	NA	NA	NA	NA	NA	NA	NA	NA	NA	NA	NA	NA	NA	NA	NA	NA	NA	NA	NA	NA	NA	NA	NA	NA	NA
RBX1_P1P2	7.72421	NA	14.8255	9.09658	NA	-9.98796	12.0908	12.0677	NA	NA	NA	64.2428	-6.4787	NA	NA	NA	NA	NA	NA	NA	NA	NA	NA	NA	NA	NA	NA	NA	NA	NA	NA	NA	NA	35.9248	NA	NA	NA	NA	NA	NA	36.6869	NA	NA	NA	NA	NA	NA	NA	NA
MRPL24_P1P2	25.6244	-11.2415	42.2379	NA	NA	-21.9552	40.1223	NA	NA	NA	NA	47.9889	NA	-3.91457	NA	NA	NA	NA	20.5811	-64.1485	-44.4219	-11.8001	-16.2341	-26.4264	-66.9628	-35.1921	28.2213	-38.6286	-55.7235	-59.4277	-66.3014	-36.1105	-49.2024	NA	NA	NA	-3.86972	NA	NA	NA	NA	NA	NA	NA	NA	NA	-5.69176	-25.7602	NA
C7orf62_P1P2	1.84971	NA	NA	NA	NA	NA	NA	NA	NA	NA	NA	NA	NA	NA	NA	NA	NA	NA	NA	NA	NA	NA	NA	NA	NA	NA	NA	NA	NA	NA	NA	NA	NA	NA	NA	NA	NA	NA	NA	NA	NA	NA	NA	NA	NA	NA	NA	NA	NA
LARP4_P1P2	3.64162	NA	3.51867	NA	NA	NA	NA	NA	NA	NA	NA	NA	NA	NA	NA	NA	NA	NA	NA	NA	NA	NA	NA	NA	NA	NA	NA	NA	NA	NA	NA	NA	NA	NA	NA	NA	NA	NA	NA	NA	5.20069	NA	NA	NA	NA	NA	NA	NA	NA
ELAVL3_P1	4.15402	NA	NA	NA	NA	NA	NA	NA	NA	NA	NA	NA	NA	NA	NA	NA	NA	NA	NA	NA	NA	NA	NA	NA	NA	NA	NA	NA	NA	NA	NA	NA	NA	NA	NA	NA	NA	NA	NA	NA	NA	NA	NA	NA	NA	NA	NA	NA	NA
VPS35_P1P2	34.6569	NA	39.7745	NA	-36.3334	9.92323	45.0683	NA	NA	5.92502	NA	91.2983	NA	-27.5712	8.18415	NA	NA	NA	37.2058	-78.7599	-42.1598	-37.5529	-31.8903	-35.1812	-99.6378	-77.927	33.5879	-35.9482	-91.1524	-66.8371	-73.3049	-37.2996	-78.1212	NA	NA	NA	NA	NA	NA	NA	NA	NA	NA	NA	NA	NA	NA	NA	NA
CCNH_P1P2	32.7959	NA	44.5557	NA	NA	NA	31.6964	NA	NA	1.39371	NA	64.8689	-4.92392	NA	NA	NA	NA	NA	NA	NA	NA	NA	NA	NA	NA	NA	NA	NA	NA	NA	NA	NA	NA	NA	NA	6.77795	-4.12166	NA	NA	NA	NA	NA	NA	NA	NA	NA	NA	NA	3.60138
HCFC1_P1P2	7.37016	NA	13.9915	NA	NA	10.9194	5.60607	NA	NA	NA	NA	11.1044	NA	-2.784	NA	NA	NA	NA	NA	NA	NA	NA	NA	NA	NA	NA	NA	NA	NA	NA	NA	NA	NA	NA	NA	NA	NA	NA	NA	NA	NA	NA	NA	NA	NA	NA	NA	NA	NA
RQCD1_P1P2	12.1342	NA	13.4699	32.4445	NA	NA	14.1315	26.9635	NA	-32.9735	NA	17.9842	-2.37838	NA	NA	NA	NA	NA	NA	NA	NA	NA	NA	NA	NA	NA	NA	NA	NA	NA	NA	NA	NA	NA	-4.89722	NA	NA	NA	NA	NA	NA	8.79385	NA	NA	NA	NA	NA	NA	NA
BUD13_P1P2	52.4673	NA	71.1868	6.79974	34.4061	NA	40.1085	NA	NA	NA	NA	32.7797	NA	8.33604	NA	NA	NA	NA	NA	NA	NA	NA	NA	NA	NA	NA	NA	NA	NA	NA	NA	NA	NA	NA	NA	NA	NA	NA	NA	NA	65.0036	NA	NA	NA	NA	NA	NA	NA	NA
DCTN2_P1P2	67.0127	NA	37.1387	NA	NA	NA	49.0925	NA	NA	NA	NA	85.1555	NA	NA	NA	NA	NA	NA	NA	NA	NA	NA	NA	NA	NA	NA	NA	NA	NA	NA	NA	NA	NA	NA	NA	20.9364	-15.2799	NA	NA	NA	104.844	NA	NA	NA	NA	NA	NA	NA	NA
GRPEL1_P1P2	7.50827	NA	16.5274	NA	NA	NA	8.85186	NA	NA	NA	NA	8.07652	NA	NA	NA	NA	NA	NA	NA	NA	NA	NA	NA	NA	NA	NA	NA	NA	NA	NA	NA	NA	NA	NA	NA	NA	NA	NA	NA	NA	NA	NA	NA	NA	NA	NA	-5.1278	-16.7095	NA
PGBD3_P1P2	0.797858	NA	NA	NA	NA	NA	NA	NA	NA	NA	NA	NA	NA	NA	NA	NA	NA	NA	NA	NA	NA	NA	NA	NA	NA	NA	NA	NA	NA	NA	NA	NA	NA	NA	NA	NA	NA	NA	NA	NA	NA	NA	NA	NA	NA	NA	NA	NA	NA
ERCC6-PGBD3_P1P2	0.797858	NA	NA	NA	NA	NA	NA	NA	NA	NA	NA	NA	NA	NA	NA	NA	NA	NA	NA	NA	NA	NA	NA	NA	NA	NA	NA	NA	NA	NA	NA	NA	NA	NA	NA	NA	NA	NA	NA	NA	NA	NA	NA	NA	NA	NA	NA	NA	NA
ERCC6_P1P2	0.797858	NA	NA	NA	NA	NA	NA	NA	NA	NA	NA	NA	NA	NA	NA	NA	NA	NA	NA	NA	NA	NA	NA	NA	NA	NA	NA	NA	NA	NA	NA	NA	NA	NA	NA	NA	NA	NA	NA	NA	NA	NA	NA	NA	NA	NA	NA	NA	NA
NDUFA7_P1P2	5.15378	NA	17.1928	NA	-18.6571	NA	7.66791	4.46254	NA	NA	NA	10.6049	NA	-1.65363	NA	NA	NA	NA	NA	NA	NA	NA	NA	NA	NA	NA	NA	NA	NA	NA	NA	NA	NA	NA	NA	7.6453	NA	NA	NA	NA	NA	NA	NA	NA	NA	NA	4.86212	NA	NA
DHODH_P1	38.0537	NA	61.7914	NA	NA	NA	37.3966	NA	NA	NA	NA	88.7397	NA	-43.478	NA	NA	NA	NA	39.9258	-57.4211	-58.2904	NA	-8.47881	-28.2072	-74.0918	-56.0843	38.025	NA	-103.166	-149.393	-60.8001	-57.9594	-65.8448	NA	NA	NA	NA	NA	NA	NA	8.51812	NA	2.58493	NA	NA	NA	NA	NA	NA
RPF1_P1P2	48.4078	NA	70.2009	NA	-32.3772	NA	75.3073	NA	NA	NA	NA	73.2413	NA	-41.0886	NA	NA	NA	NA	NA	NA	NA	NA	NA	NA	NA	NA	NA	NA	NA	NA	NA	NA	NA	NA	NA	13.7938	NA	NA	NA	NA	61.3557	NA	NA	NA	NA	NA	NA	NA	NA
CCT7_P1P2	44.2744	NA	77.3818	NA	NA	NA	63.0663	NA	NA	NA	NA	58.6978	NA	NA	NA	NA	NA	NA	NA	NA	NA	NA	NA	NA	NA	NA	NA	NA	NA	NA	NA	NA	NA	39.6911	NA	7.10874	NA	NA	NA	NA	68.7401	NA	NA	NA	NA	NA	NA	NA	NA
HSPA9_P1P2	34.2853	NA	77.0136	NA	21.8237	NA	38.9781	15.9739	NA	3.01919	NA	65.0267	NA	NA	NA	NA	NA	NA	NA	NA	NA	NA	NA	NA	NA	NA	NA	NA	NA	NA	NA	NA	NA	7.86647	-6.52561	16.4793	-5.42164	NA	NA	NA	56.7805	NA	NA	-4.9997	NA	NA	-7.49802	NA	NA
WDR70_P1P2	25.0839	NA	82.5356	8.34303	NA	NA	42.4747	13.1276	NA	NA	NA	76.6328	-6.55619	-6.07864	NA	NA	NA	NA	NA	NA	NA	NA	NA	NA	NA	NA	NA	NA	NA	NA	NA	NA	NA	NA	NA	NA	NA	NA	NA	NA	7.4444	NA	NA	NA	NA	NA	NA	NA	NA
KIAA0556_P1P2	1.72959	NA	NA	NA	NA	NA	NA	NA	NA	NA	NA	NA	NA	NA	NA	NA	NA	NA	NA	NA	NA	NA	NA	NA	NA	NA	NA	NA	NA	NA	NA	NA	NA	NA	NA	NA	NA	NA	NA	NA	NA	NA	NA	NA	NA	NA	NA	NA	4.53416
HMGN2_P1P2	3.11673	NA	NA	NA	NA	NA	NA	NA	NA	NA	NA	NA	NA	NA	NA	NA	NA	NA	NA	NA	NA	NA	NA	NA	NA	NA	NA	NA	NA	NA	NA	NA	NA	NA	NA	NA	NA	NA	NA	NA	NA	NA	NA	NA	NA	NA	NA	NA	NA
MRPS15_P1P2	13.4144	-4.13877	15.403	2.9732	NA	-14.1924	20.8496	NA	NA	NA	NA	23.7936	-4.7987	-8.30835	NA	NA	NA	NA	NA	NA	NA	NA	NA	NA	NA	NA	NA	NA	NA	NA	NA	NA	NA	NA	NA	NA	-2.96348	NA	NA	NA	NA	NA	NA	NA	NA	NA	-13.5669	-25.0302	NA
NDUFA13_P1P2	4.53894	NA	6.76161	NA	NA	NA	NA	NA	NA	NA	NA	NA	NA	NA	NA	NA	NA	NA	NA	NA	NA	NA	NA	NA	NA	NA	NA	NA	NA	NA	NA	NA	NA	NA	NA	NA	NA	NA	NA	NA	NA	NA	NA	NA	NA	NA	NA	NA	NA
SLC38A5_P1P2	2.89772	NA	9.1946	NA	-6.6004	NA	2.96822	NA	NA	NA	NA	1.11488	NA	NA	NA	NA	NA	NA	NA	NA	NA	NA	NA	NA	NA	NA	NA	NA	NA	NA	NA	NA	NA	NA	NA	NA	NA	NA	NA	NA	NA	NA	3.56353	NA	NA	NA	NA	NA	NA
RAD51_P1P2	44.7885	NA	58.842	15.6926	NA	NA	63.9978	NA	NA	-31.2709	NA	70.2277	NA	-1.2975	NA	NA	NA	NA	35.835	-37.8646	-54.0121	NA	-13.6624	-20.414	-48.2432	-27.304	36.6782	-59.9706	-91.4832	-22.1329	-60.5828	-38.932	-19.3509	58.2767	-8.28784	NA	NA	NA	NA	NA	52.0449	NA	NA	NA	NA	NA	NA	NA	NA
AMELY_P1P2	2.46166	NA	NA	NA	-2.70668	NA	NA	NA	NA	NA	NA	NA	NA	NA	NA	NA	NA	NA	NA	NA	NA	NA	NA	NA	NA	NA	NA	NA	NA	NA	NA	NA	NA	NA	NA	NA	NA	NA	NA	NA	NA	NA	NA	NA	NA	NA	NA	NA	NA
INO80C_P1P2	9.55801	NA	15.0233	14.909	-10.7613	NA	13.9279	NA	NA	NA	NA	10.8744	-2.86437	NA	NA	NA	NA	NA	NA	NA	NA	NA	NA	NA	NA	NA	NA	NA	NA	NA	NA	NA	NA	3.8219	NA	NA	NA	NA	NA	NA	8.41678	NA	2.43946	NA	NA	NA	NA	NA	NA
RPL10A_P1P2	29.7759	NA	50.8794	NA	NA	NA	33.3286	34.8003	NA	NA	NA	29.1233	NA	NA	NA	NA	NA	8.1386	NA	NA	NA	NA	NA	NA	NA	NA	NA	NA	NA	NA	NA	NA	NA	NA	NA	14.2346	-7.88925	NA	NA	NA	47.1795	NA	NA	NA	NA	NA	NA	NA	NA
SLC22A8_P1P2	2.93411	NA	NA	NA	NA	NA	NA	NA	NA	NA	NA	NA	NA	NA	NA	NA	3.11962	NA	NA	NA	NA	NA	NA	NA	NA	NA	NA	NA	NA	NA	NA	NA	NA	NA	NA	NA	NA	NA	NA	NA	NA	NA	NA	NA	NA	NA	NA	NA	NA
PDLIM4_P1P2	8.07759	NA	NA	NA	NA	NA	NA	NA	NA	NA	NA	NA	NA	NA	NA	NA	4.72803	NA	NA	NA	NA	NA	NA	NA	NA	NA	NA	NA	NA	NA	NA	NA	NA	NA	NA	NA	NA	NA	NA	NA	NA	NA	NA	NA	NA	NA	NA	NA	NA
VPS13B_P1P2	5.22821	NA	4.30345	-25.3497	NA	NA	7.34905	NA	NA	NA	NA	6.16806	-8.54748	-4.7976	NA	NA	NA	NA	NA	NA	NA	NA	NA	NA	NA	NA	NA	NA	NA	NA	NA	NA	NA	NA	NA	NA	NA	NA	NA	NA	NA	NA	NA	NA	NA	NA	NA	NA	19.3467
MRPL21_P1P2	28.0239	NA	29.9947	NA	NA	-9.4184	33.2987	NA	NA	4.27178	NA	71.0834	NA	-17.1296	NA	NA	NA	NA	NA	NA	NA	NA	NA	NA	NA	NA	NA	NA	NA	NA	NA	NA	NA	NA	NA	NA	NA	NA	NA	NA	NA	NA	NA	NA	NA	NA	-2.05419	NA	NA
CNOT3_P1P2	10.5633	NA	42.0348	15.0202	34.7803	NA	25.9099	22.0315	NA	NA	NA	21.9654	NA	NA	NA	NA	NA	NA	NA	NA	NA	NA	NA	NA	NA	NA	NA	NA	NA	NA	NA	NA	NA	7.73215	NA	11.6896	NA	NA	NA	NA	13.1302	NA	-4.34449	NA	NA	NA	NA	NA	NA
DDX18_P1P2	25.7507	NA	56.7799	NA	NA	NA	48.659	20.6205	NA	NA	NA	63.313	NA	-8.27404	NA	NA	NA	NA	NA	NA	NA	NA	NA	NA	NA	NA	NA	NA	NA	NA	NA	NA	NA	35.1726	NA	5.6184	NA	NA	NA	NA	84.6364	-8.77825	NA	NA	NA	NA	NA	NA	NA
DUSP12_P1P2	8.61266	NA	11.3595	NA	2.97444	NA	26.2755	NA	NA	NA	NA	22.1178	NA	-11.4219	NA	NA	NA	NA	NA	NA	NA	NA	NA	NA	NA	NA	NA	NA	NA	NA	NA	NA	NA	NA	NA	NA	NA	NA	NA	NA	NA	-2.16084	NA	NA	NA	NA	NA	NA	NA
INHBA_P1P2	3.3077	NA	NA	NA	NA	NA	NA	NA	NA	NA	NA	NA	NA	NA	NA	NA	NA	NA	NA	NA	NA	NA	NA	NA	NA	NA	NA	NA	NA	NA	NA	NA	NA	NA	NA	NA	NA	NA	NA	NA	NA	NA	NA	NA	NA	NA	NA	NA	NA
PEX14_P1P2	3.87995	NA	8.63333	NA	-2.2019	NA	4.4357	NA	NA	NA	NA	NA	NA	-4.21091	NA	NA	NA	NA	NA	NA	NA	NA	NA	NA	NA	NA	NA	NA	NA	NA	NA	NA	NA	NA	NA	NA	NA	NA	NA	NA	3.14631	-4.23766	-13.6675	NA	NA	NA	-2.41228	NA	NA
HNRNPL_P1	16.3221	NA	26.0033	NA	NA	NA	37.7867	NA	NA	NA	NA	61.3086	NA	NA	NA	NA	1.41686	NA	NA	NA	NA	NA	NA	NA	NA	NA	NA	NA	NA	NA	NA	NA	NA	NA	NA	NA	NA	NA	NA	NA	NA	NA	NA	NA	NA	NA	NA	NA	NA
RPUSD3_P1P2	9.83089	-7.35369	14.6613	NA	NA	-13.4988	14.1051	NA	NA	3.02237	NA	18.5758	-12.0476	NA	9.51068	NA	NA	NA	NA	NA	NA	NA	NA	NA	NA	NA	NA	NA	NA	NA	NA	NA	NA	NA	-5.64995	NA	-4.26271	NA	NA	NA	2.48621	NA	NA	NA	NA	NA	-5.37777	-22.1168	NA
PPAN-P2RY11_P1P2	41.4861	NA	66.6297	NA	-36.1192	NA	50.6148	11.3543	NA	1.59938	NA	70.7405	NA	NA	NA	NA	NA	NA	NA	NA	NA	NA	NA	NA	NA	NA	NA	NA	NA	NA	NA	NA	NA	18.1297	-12.9844	10.3998	NA	NA	NA	NA	67.7148	NA	NA	NA	NA	NA	NA	NA	NA
PPAN_P1P2	41.4861	NA	66.6297	NA	-21.914	-4.25746	55.6822	11.3543	NA	NA	NA	70.7405	NA	NA	NA	NA	NA	NA	NA	NA	NA	NA	NA	NA	NA	NA	NA	NA	NA	NA	NA	NA	NA	17.7348	-11.9438	8.03211	NA	NA	NA	NA	58.4758	NA	NA	NA	NA	NA	NA	NA	NA
NIP7_P1P2	41.227	NA	71.8407	NA	-24.3313	-13.472	50.4062	NA	NA	8.82679	NA	61.5514	-18.4327	NA	NA	NA	NA	NA	NA	NA	NA	NA	NA	NA	NA	NA	NA	NA	NA	NA	NA	NA	NA	14.296	NA	NA	-3.62535	NA	NA	NA	26.5014	8.82633	NA	NA	NA	NA	NA	NA	NA
AGPS_P1P2	4.1423	-3.4866	17.7347	NA	-5.22808	-15.3656	9.56499	NA	NA	NA	NA	16.4373	-2.14803	-2.31762	NA	NA	NA	NA	NA	NA	NA	NA	NA	NA	NA	NA	NA	NA	NA	NA	NA	NA	NA	NA	NA	NA	NA	NA	NA	NA	NA	NA	-10.3962	NA	NA	NA	-2.92603	NA	NA
RNF8_P1P2	3.17497	NA	4.65186	NA	NA	NA	NA	6.22498	NA	NA	NA	NA	NA	NA	NA	NA	NA	NA	NA	NA	NA	NA	NA	NA	NA	NA	NA	NA	NA	NA	NA	NA	NA	NA	NA	NA	NA	NA	NA	NA	14.3687	NA	NA	NA	NA	NA	NA	NA	NA
MRPL30_P1	18.7026	-7.72224	27.7025	NA	NA	-21.0278	26.5261	4.24104	NA	3.50377	NA	38.1411	NA	NA	NA	NA	NA	NA	23.6394	-59.4891	-41.3662	-10.9853	-5.10627	-23.4339	-65.6406	-42.8667	25.5505	-45.0967	-56.0178	-69.2627	-61.3412	-32.7855	-52.6094	8.12964	-4.76735	NA	-3.36863	NA	NA	NA	NA	NA	NA	NA	NA	NA	-21.5175	-32.8689	NA
SHMT2_P1P2	11.8111	-11.7839	32.0191	NA	-11.7238	-19.6326	13.4734	NA	NA	NA	NA	41.0601	-18.1266	-45.5207	NA	NA	NA	NA	NA	NA	NA	NA	NA	NA	NA	NA	NA	NA	NA	NA	NA	NA	NA	NA	NA	NA	NA	NA	NA	NA	NA	NA	-1.00569	NA	NA	NA	NA	NA	NA
BRIP1_P1P2	5.52857	NA	6.31171	11.3273	NA	NA	4.02073	NA	NA	-4.23274	NA	6.82539	NA	-6.87281	NA	5.8813	NA	NA	NA	NA	NA	NA	NA	NA	NA	NA	NA	NA	NA	NA	NA	NA	NA	NA	NA	NA	NA	NA	NA	NA	NA	NA	NA	NA	NA	NA	NA	NA	NA
MAVS_P2	1.93543	NA	NA	NA	NA	NA	NA	NA	NA	NA	NA	NA	NA	NA	NA	NA	NA	NA	NA	NA	NA	NA	NA	NA	NA	NA	NA	NA	NA	NA	NA	NA	NA	NA	NA	NA	NA	NA	NA	NA	NA	NA	NA	NA	NA	NA	-3.65822	NA	NA
GUCD1_P1P2	10.5684	NA	35.5511	NA	NA	NA	7.75256	NA	NA	NA	NA	32.6958	NA	-38.9588	NA	NA	NA	NA	NA	NA	NA	NA	NA	NA	NA	NA	NA	NA	NA	NA	NA	NA	NA	NA	NA	NA	NA	NA	NA	NA	NA	NA	NA	NA	NA	NA	NA	NA	NA
SLC4A7_P1P2	6.7724	NA	12.7943	NA	NA	-23.1595	NA	3.17392	NA	NA	NA	13.6908	19.2121	-17.5621	NA	NA	NA	NA	NA	NA	NA	NA	NA	NA	NA	NA	NA	NA	NA	NA	NA	NA	NA	NA	NA	NA	NA	NA	NA	NA	NA	NA	3.53318	NA	NA	NA	NA	NA	NA
EMG1_P1P2	48.5779	-2.41971	70.876	NA	-18.6615	-5.13044	30.9111	26.9269	NA	NA	NA	69.3077	NA	-8.70867	NA	NA	NA	NA	NA	NA	NA	NA	NA	NA	NA	NA	NA	NA	NA	NA	NA	NA	NA	NA	NA	NA	NA	NA	NA	NA	NA	NA	NA	NA	NA	NA	NA	NA	NA
RFT1_P1P2	5.92673	NA	NA	NA	NA	NA	NA	NA	NA	NA	NA	NA	NA	NA	NA	NA	NA	NA	NA	NA	NA	NA	NA	NA	NA	NA	NA	NA	NA	NA	NA	NA	NA	NA	NA	15.3634	-11.8162	NA	NA	NA	NA	NA	NA	NA	NA	NA	-3.8464	-1.65181	NA
PMVK_P1P2	25.4538	NA	36.6352	NA	NA	NA	32.9907	NA	NA	NA	NA	50.3482	-14.2684	-10.3252	8.75074	NA	NA	NA	NA	NA	NA	NA	NA	NA	NA	NA	NA	NA	NA	NA	NA	NA	NA	NA	NA	NA	NA	NA	NA	NA	NA	NA	NA	NA	NA	16.1836	NA	NA	NA
WDR3_P1P2	57.5751	NA	91.7976	14.7355	-23.5252	-3.35281	69.7298	54.1203	10.877	18.1641	NA	83.7848	NA	-12.9068	NA	NA	NA	NA	50.6491	-50.5535	-52.6533	NA	NA	-20.9111	-37.0076	-47.4669	46.9059	-22.7871	NA	-41.1994	-23.8904	NA	-26.3676	NA	NA	10.0549	-8.45702	NA	NA	NA	71.7406	NA	NA	NA	NA	NA	5.22276	NA	NA
MYBL2_P1P2	39.9632	NA	69.0632	24.1147	32.4862	NA	53.4144	NA	NA	-13.7664	NA	30.0079	NA	NA	NA	NA	NA	NA	37.8951	19.0083	18.412	40.0687	31.4207	0.553074	15.2678	23.9474	37.8835	12.375	57.784	NA	49.109	20.9999	30.7608	9.25803	NA	NA	NA	NA	NA	NA	14.015	-8.06406	NA	NA	NA	NA	NA	NA	NA
RASSF1_P1	2.57564	NA	2.69446	NA	NA	NA	6.99109	NA	NA	NA	NA	8.50514	-2.52582	-9.22115	NA	NA	NA	NA	NA	NA	NA	NA	NA	NA	NA	NA	NA	NA	NA	NA	NA	NA	NA	NA	NA	NA	NA	NA	NA	NA	NA	NA	NA	NA	NA	NA	NA	NA	NA
TRAPPC8_P1P2	5.50958	4.54462	4.17104	-2.04742	NA	NA	5.18789	NA	NA	NA	NA	7.4939	-1.91418	-2.54704	NA	NA	NA	NA	NA	NA	NA	NA	NA	NA	NA	NA	NA	NA	NA	NA	NA	NA	NA	NA	NA	NA	NA	NA	NA	NA	NA	NA	NA	NA	NA	NA	NA	NA	NA
LCE1C_P1P2	1.45197	NA	NA	NA	NA	NA	NA	NA	NA	NA	NA	NA	NA	NA	NA	NA	NA	NA	NA	NA	NA	NA	NA	NA	NA	NA	NA	NA	NA	NA	NA	NA	NA	NA	NA	NA	NA	NA	NA	NA	NA	NA	NA	NA	NA	NA	NA	NA	NA
RAD17_P1P2	9.79633	NA	25.3665	5.02033	NA	NA	19.4624	28.8955	NA	-2.22496	NA	34.6484	-13.1384	NA	18.1405	NA	6.28625	NA	NA	NA	NA	NA	NA	NA	NA	NA	NA	NA	NA	NA	NA	NA	NA	12.9989	NA	NA	NA	NA	NA	NA	4.49285	NA	NA	NA	NA	NA	NA	NA	NA
GSPT1_P1P2	8.4997	NA	28.8546	NA	-40.6383	NA	18.4173	NA	NA	4.13337	NA	15.9563	6.38551	-4.24199	NA	NA	NA	NA	NA	NA	NA	NA	NA	NA	NA	NA	NA	NA	NA	NA	NA	NA	NA	NA	4.02454	NA	NA	NA	NA	NA	NA	NA	NA	NA	NA	NA	NA	NA	NA
C11orf73_P1P2	1.52893	NA	NA	NA	3.63792	NA	NA	NA	NA	NA	NA	NA	NA	NA	NA	3.51139	NA	NA	NA	NA	NA	NA	NA	NA	NA	NA	NA	NA	NA	NA	NA	NA	NA	NA	NA	NA	NA	NA	NA	NA	NA	NA	NA	NA	NA	NA	NA	NA	NA
GLMN_P1P2	30.9821	NA	48.9404	7.08279	NA	-21.5228	50.4685	12.4926	NA	NA	NA	55.9291	-20.1629	-9.12386	15.1231	NA	8.35091	NA	NA	NA	NA	NA	NA	NA	NA	NA	NA	NA	NA	NA	NA	NA	NA	NA	NA	NA	NA	NA	NA	NA	NA	NA	NA	NA	NA	NA	NA	NA	NA
FAU_P1P2	30.7511	NA	56.7014	7.57145	NA	NA	22.3495	48.7442	NA	NA	NA	60.6521	NA	-5.66032	NA	NA	NA	NA	NA	NA	NA	NA	NA	NA	NA	NA	NA	NA	NA	NA	NA	NA	NA	NA	NA	12.5059	NA	NA	NA	NA	33.4616	NA	NA	NA	NA	NA	NA	NA	NA
FXN_P1P2	17.35	-3.84696	9.31228	12.8688	8.5158	NA	44.0242	NA	NA	NA	NA	16.8783	NA	NA	NA	NA	NA	NA	NA	NA	NA	NA	NA	NA	NA	NA	NA	NA	NA	NA	NA	NA	NA	NA	NA	12.1163	NA	NA	NA	NA	29.0197	NA	NA	NA	NA	NA	-2.06721	-3.4377	NA
PNO1_P1P2	15.6209	NA	39.8907	NA	-5.69854	NA	29.9982	13.5364	NA	NA	NA	58.5922	NA	-16.4006	NA	NA	NA	NA	NA	NA	NA	NA	NA	NA	NA	NA	NA	NA	NA	NA	NA	NA	NA	NA	NA	NA	NA	NA	NA	NA	NA	NA	NA	NA	NA	NA	NA	NA	NA
MRPL18_P1P2	44.2947	-14.5794	81.79	NA	NA	-40.0329	61.784	NA	NA	18.4265	NA	98.4372	-10.481	-21.1134	NA	NA	NA	NA	42.0486	-79.1118	-56.8032	-15.1673	-9.1848	-35.0438	-88.4169	-65.0207	43.6258	-60.4495	-72.0658	-80.2622	-75.1719	-39.5995	-66.5086	NA	NA	NA	-3.49287	NA	NA	NA	4.63113	NA	2.22474	NA	NA	NA	-4.72168	-14.6028	NA
NPAT_P1P2	47.8118	NA	84.4291	NA	NA	NA	49.1696	27.3065	NA	-33.5884	NA	74.4128	NA	-51.2834	NA	NA	NA	NA	NA	NA	NA	NA	NA	NA	NA	NA	NA	NA	NA	NA	NA	NA	NA	NA	NA	NA	NA	NA	NA	NA	NA	NA	NA	NA	NA	NA	NA	NA	NA
CCAR1_P1P2	8.34797	NA	19.0097	24.9527	8.64117	8.35714	22.5578	NA	NA	NA	NA	14.4572	NA	-1.62532	10.1686	NA	NA	NA	NA	NA	NA	NA	NA	NA	NA	NA	NA	NA	NA	NA	NA	NA	NA	NA	NA	NA	NA	NA	NA	NA	17.4251	NA	NA	NA	NA	NA	NA	NA	4.60171
FASTKD5_P1P2	9.70196	-8.72367	22.9622	4.92214	NA	-19.6895	17.881	NA	NA	8.53947	NA	12.4094	NA	NA	13.4342	NA	5.76509	NA	NA	NA	NA	NA	NA	NA	NA	NA	NA	NA	NA	NA	NA	NA	NA	NA	NA	NA	NA	NA	NA	NA	NA	NA	NA	NA	NA	NA	-3.46747	NA	NA
UBOX5_P1P2	14.5179	-8.72367	22.9622	2.62579	NA	-20.4483	15.6935	NA	NA	8.53947	NA	12.4094	NA	NA	16.2142	NA	6.77824	NA	NA	NA	NA	NA	NA	NA	NA	NA	NA	NA	NA	NA	NA	NA	NA	NA	NA	NA	NA	NA	NA	NA	NA	NA	-2.56142	NA	NA	NA	NA	-13.3653	NA
PPAPDC1A_P1P2	7.73161	NA	9.55447	NA	NA	NA	12.3655	NA	NA	NA	NA	NA	NA	NA	NA	NA	NA	NA	NA	NA	NA	NA	NA	NA	NA	NA	NA	NA	NA	NA	NA	NA	NA	NA	NA	6.65541	NA	NA	NA	NA	NA	NA	NA	NA	NA	NA	NA	NA	NA
CPSF3L_P1P2	21.6574	NA	37.9172	5.92708	5.9305	NA	25.7442	NA	NA	NA	NA	30.5335	-3.55577	NA	NA	NA	NA	NA	NA	NA	NA	NA	NA	NA	NA	NA	NA	NA	NA	NA	NA	NA	NA	NA	NA	NA	NA	NA	NA	NA	NA	NA	NA	NA	NA	NA	NA	NA	NA
EIF4G1_P1P2	33.567	NA	67.7506	NA	9.9424	NA	42.2235	NA	3.00495	27.9515	NA	64.4018	NA	-20.3236	NA	NA	NA	NA	NA	NA	NA	NA	NA	NA	NA	NA	NA	NA	NA	NA	NA	NA	NA	2.10167	NA	NA	NA	NA	NA	NA	NA	NA	NA	NA	NA	NA	8.17313	-1.42353	NA
CYP27C1_P1P2	3.18927	NA	NA	NA	NA	NA	NA	NA	NA	NA	NA	NA	NA	NA	NA	NA	NA	NA	NA	NA	NA	NA	NA	NA	NA	NA	NA	NA	NA	NA	NA	NA	NA	NA	NA	NA	NA	NA	NA	NA	NA	NA	NA	NA	NA	NA	-3.52479	NA	NA
GPN3_P1P2	43.763	NA	75.0325	NA	NA	NA	35.157	NA	NA	NA	NA	69.4481	NA	-17.0217	NA	NA	NA	NA	NA	NA	NA	NA	NA	NA	NA	NA	NA	NA	NA	NA	NA	NA	NA	NA	NA	NA	-8.73008	NA	NA	NA	NA	NA	NA	NA	NA	NA	NA	NA	NA
MPHOSPH10_P1P2	24.142	NA	33.2013	NA	-6.347	NA	22.5481	36.1927	NA	NA	NA	24.3372	NA	NA	NA	NA	NA	NA	NA	NA	NA	NA	NA	NA	NA	NA	NA	NA	NA	NA	NA	NA	NA	5.8503	-7.32159	NA	NA	NA	NA	NA	36.7035	NA	NA	NA	NA	NA	NA	NA	NA
METTL16_P1P2	49.8198	NA	55.2164	NA	9.81932	NA	46.4591	9.53405	NA	NA	NA	67.8727	NA	-5.80526	NA	NA	NA	NA	NA	NA	NA	NA	NA	NA	NA	NA	NA	NA	NA	NA	NA	NA	NA	NA	NA	NA	NA	NA	NA	NA	NA	NA	NA	NA	NA	NA	NA	NA	NA
SDAD1_P1P2	45.578	NA	74.6222	NA	-9.89735	NA	59.9201	NA	NA	NA	NA	68.7905	NA	NA	NA	NA	NA	NA	NA	NA	NA	NA	NA	NA	NA	NA	NA	NA	NA	NA	NA	NA	NA	NA	NA	5.4362	NA	NA	NA	NA	95.0266	NA	NA	NA	NA	NA	NA	NA	NA
EIF4G2_P1	36.3285	NA	65.9329	NA	21.7746	NA	55.4325	NA	NA	NA	NA	62.7022	NA	-35.7049	NA	NA	NA	NA	37.1559	-67.5988	-56.8013	-30.1369	-29.1453	-31.147	-75.2757	-67.6005	39.2039	-57.8145	-103.991	-138.417	-61.1214	-46.6363	-82.9741	14.3013	NA	3.93363	NA	NA	NA	NA	17.4946	-6.43544	NA	NA	NA	NA	-3.49959	-22.8597	NA
HSP90AB1_P1P2	2.71535	-1.08048	4.51872	NA	NA	NA	5.93067	5.48748	NA	NA	NA	8.03235	-6.29703	NA	6.14242	NA	NA	NA	10.3758	-23.2883	-8.60136	-61.1794	-26.7241	NA	-10.5772	-17.8818	9.76766	-10.0744	-26.7799	-47.4353	-26.687	-6.39873	-28.2962	NA	NA	NA	NA	NA	NA	NA	NA	NA	NA	NA	NA	NA	3.91216	5.80194	NA
TM9SF1_P1	1.08703	NA	NA	NA	NA	NA	NA	NA	NA	NA	NA	NA	NA	NA	NA	NA	NA	NA	NA	NA	NA	NA	NA	NA	NA	NA	NA	NA	NA	NA	NA	NA	NA	NA	NA	NA	NA	NA	NA	NA	NA	NA	NA	NA	NA	NA	NA	NA	NA
CHMP4A_P1	1.02905	NA	NA	NA	NA	NA	NA	NA	NA	NA	NA	NA	NA	NA	NA	NA	NA	NA	NA	NA	NA	NA	NA	NA	NA	NA	NA	NA	NA	NA	NA	NA	NA	NA	NA	NA	NA	NA	NA	NA	NA	NA	NA	NA	NA	NA	NA	NA	NA
MED4_P1P2	6.94889	NA	18.2371	NA	NA	2.9849	11.9924	NA	NA	NA	NA	16.5059	NA	NA	NA	NA	NA	NA	NA	NA	NA	NA	NA	NA	NA	NA	NA	NA	NA	NA	NA	NA	NA	NA	NA	NA	NA	NA	NA	NA	NA	NA	NA	NA	NA	NA	NA	NA	NA
RPS20_P1P2	29.191	NA	46.3757	NA	11.2949	NA	36.9835	9.50489	NA	NA	NA	27.0531	NA	-6.04361	NA	NA	NA	NA	NA	NA	NA	NA	NA	NA	NA	NA	NA	NA	NA	NA	NA	NA	NA	NA	NA	14.7975	-4.59279	NA	NA	NA	46.6059	NA	NA	NA	NA	NA	NA	NA	NA
CTU1_P1P2	2.74803	NA	NA	NA	-3.03887	NA	15.6606	-2.15966	NA	NA	NA	16.2752	-17.8637	-2.70803	NA	NA	5.14418	NA	NA	NA	NA	NA	NA	NA	NA	NA	NA	NA	NA	NA	NA	NA	NA	NA	NA	NA	NA	NA	NA	NA	NA	NA	NA	NA	NA	NA	NA	NA	NA
HNRNPM_P1	4.96315	NA	22.2502	NA	11.9055	NA	28.8253	NA	NA	NA	NA	16.5174	-4.99413	-2.49359	NA	NA	NA	NA	NA	NA	NA	NA	NA	NA	NA	NA	NA	NA	NA	NA	NA	NA	NA	10.9086	NA	NA	NA	NA	NA	NA	NA	NA	NA	NA	NA	NA	NA	NA	NA
SLC38A2_P1P2	3.27964	NA	18.7154	-11.3244	-8.97659	18.1551	NA	NA	NA	4.83831	NA	7.55443	NA	-2.18441	NA	NA	NA	NA	10.9418	-43.6647	-20.0937	-29.0257	-16.907	-22.5532	-55.4697	-36.3034	8.55513	-33.092	-34.4215	-44.9747	-40.3042	-24.6156	-39.4087	NA	NA	NA	NA	NA	NA	NA	NA	NA	NA	NA	NA	NA	NA	NA	NA
NARFL_P1P2	16.2306	NA	16.5543	NA	NA	NA	24.8868	NA	NA	NA	NA	49.8158	NA	NA	NA	NA	NA	NA	NA	NA	NA	NA	NA	NA	NA	NA	NA	NA	NA	NA	NA	NA	NA	12.9011	NA	10.4135	NA	NA	NA	NA	16.1724	NA	NA	NA	NA	NA	NA	NA	NA
MICA_P1P2	5.02892	NA	NA	NA	NA	NA	NA	NA	NA	NA	NA	NA	NA	NA	NA	NA	NA	NA	NA	NA	NA	NA	NA	NA	NA	NA	NA	NA	NA	NA	NA	NA	NA	NA	NA	NA	NA	1.50538	NA	NA	NA	NA	NA	NA	NA	NA	NA	NA	NA
NOP16_P1P2	15.0392	NA	50.1651	NA	-6.25955	NA	17.0235	NA	NA	NA	NA	64.3691	NA	NA	NA	NA	NA	NA	NA	NA	NA	NA	NA	NA	NA	NA	NA	NA	NA	NA	NA	NA	NA	NA	NA	5.46957	NA	NA	NA	NA	11.5227	NA	NA	NA	NA	NA	NA	NA	NA
HMG20B_P1	6.15411	NA	7.52662	NA	NA	NA	7.65476	NA	NA	NA	NA	9.25769	NA	NA	NA	NA	NA	NA	NA	NA	NA	NA	NA	NA	NA	NA	NA	NA	NA	NA	NA	NA	NA	NA	NA	NA	NA	NA	NA	NA	NA	NA	NA	NA	NA	NA	NA	NA	NA
RBM28_P1P2	38.8592	NA	59.3203	4.5286	-24.9078	NA	34.4014	7.35679	NA	NA	NA	66.2723	NA	-9.90972	NA	NA	NA	NA	NA	NA	NA	NA	NA	NA	NA	NA	NA	NA	NA	NA	NA	NA	NA	NA	NA	6.19856	NA	NA	NA	NA	67.2355	-8.02003	NA	NA	NA	NA	NA	NA	NA
DCTN4_P1P2	11.0183	NA	11.3641	NA	14.5861	NA	14.834	24.0389	NA	NA	NA	23.7668	NA	-8.37866	NA	NA	NA	NA	NA	NA	NA	NA	NA	NA	NA	NA	NA	NA	NA	NA	NA	NA	NA	NA	NA	NA	NA	NA	NA	NA	NA	NA	NA	NA	NA	NA	NA	NA	NA
GIP_P1P2	2.00489	NA	NA	NA	NA	NA	NA	NA	NA	NA	NA	NA	NA	NA	NA	NA	NA	NA	NA	NA	NA	NA	NA	NA	NA	NA	NA	NA	NA	NA	NA	NA	NA	NA	NA	NA	NA	NA	NA	NA	NA	NA	NA	NA	NA	NA	NA	NA	NA
NAF1_P1P2	8.57816	NA	4.5028	NA	-7.66694	-3.42229	7.76341	6.25054	NA	NA	NA	9.64316	NA	-4.03246	NA	NA	NA	NA	NA	NA	NA	NA	NA	NA	NA	NA	NA	NA	NA	NA	NA	NA	NA	NA	NA	3.87781	NA	NA	NA	NA	NA	NA	NA	NA	NA	NA	NA	NA	NA
RBM12_P1P2	18.7018	NA	26.9376	NA	13.3094	NA	27.8652	36.3544	NA	3.78013	NA	18.8458	NA	NA	10.0602	NA	NA	NA	24.2875	-71.9685	-46.0501	-21.9847	-4.69765	-27.0428	-75.1188	-58.7621	25.425	-51.7227	-78.6866	-97.2787	-52.296	-55.7886	-66.5064	NA	-5.20026	NA	-11.496	NA	NA	NA	24.1397	-11.4983	1.87472	NA	NA	NA	NA	NA	NA
RBM8A_P1P2	18.6415	NA	61.6008	NA	33.9309	NA	13.3792	36.2061	NA	-13.4805	NA	37.2312	NA	-13.019	NA	NA	NA	NA	NA	NA	NA	NA	NA	NA	NA	NA	NA	NA	NA	NA	NA	NA	NA	NA	NA	8.66512	NA	NA	NA	NA	68.3112	NA	NA	NA	NA	NA	NA	NA	NA
CPNE1_P1P2	16.4623	NA	26.9376	NA	15.739	NA	27.8652	36.3544	1.67331	NA	NA	18.8458	NA	NA	5.57052	8.46736	NA	NA	NA	NA	NA	NA	NA	NA	NA	NA	NA	NA	NA	NA	NA	NA	NA	NA	NA	NA	-9.06138	NA	NA	NA	15.6178	-11.2704	15.5831	NA	NA	NA	-25.2713	-22.5672	NA
ACTG1_P1P2	1.94471	NA	NA	NA	NA	NA	NA	NA	NA	NA	NA	NA	NA	NA	NA	NA	NA	NA	NA	NA	NA	NA	NA	NA	NA	NA	NA	NA	NA	NA	NA	NA	NA	3.33553	NA	NA	-10.3988	NA	NA	NA	3.00999	NA	NA	NA	NA	NA	NA	NA	NA
CCNC_P1P2	9.293	NA	20.2061	NA	NA	4.43086	40.4902	-19.7383	6.69212	NA	NA	14.4089	10.2725	15.4042	5.94447	NA	10.9884	NA	24.5549	-66.4912	-83.1776	-100.658	-81.8636	-37.2514	-84.4686	-71.8103	18.2921	-56.5452	-117.096	-115.409	-88.3609	-35.612	-99.8801	NA	NA	NA	-2.72462	NA	NA	NA	NA	7.22836	NA	NA	NA	NA	NA	NA	-47.4749
RBM25_P1P2	5.88044	NA	47.1869	NA	NA	NA	46.5371	NA	NA	NA	NA	61.3903	NA	-13.4692	8.49014	NA	8.9478	NA	NA	NA	NA	NA	NA	NA	NA	NA	NA	NA	NA	NA	NA	NA	NA	NA	NA	NA	NA	NA	NA	NA	NA	NA	NA	NA	NA	NA	NA	NA	NA
MBD3_P1P2	10.915	NA	16.6875	NA	11.9754	NA	8.87913	NA	NA	NA	NA	19.2719	-14.8649	-6.13335	NA	NA	NA	NA	NA	NA	NA	NA	NA	NA	NA	NA	NA	NA	NA	NA	NA	NA	NA	NA	NA	NA	NA	NA	NA	NA	NA	NA	NA	NA	NA	NA	NA	NA	NA
ZNF283_P1P2	1.67915	NA	NA	NA	NA	NA	NA	NA	NA	NA	NA	NA	NA	NA	NA	NA	NA	NA	NA	NA	NA	NA	NA	NA	NA	NA	NA	NA	NA	NA	NA	NA	NA	NA	NA	NA	NA	NA	NA	NA	NA	NA	NA	NA	NA	NA	NA	NA	NA
MIPEP_P1P2	29.7093	-12.4931	45.4038	NA	NA	-31.0023	50.8548	NA	NA	NA	NA	55.3695	-13.6249	-19.9138	NA	NA	NA	NA	NA	NA	NA	NA	NA	NA	NA	NA	NA	NA	NA	NA	NA	NA	NA	NA	NA	NA	NA	NA	NA	NA	NA	NA	NA	NA	NA	NA	NA	-18.6463	NA
ASCC3_P1P2	38.968	13.2803	50.6091	NA	56.1668	16.1838	56.0136	NA	NA	-30.961	NA	65.9783	NA	-11.6178	NA	NA	NA	NA	NA	NA	NA	NA	NA	NA	NA	NA	NA	NA	NA	NA	NA	NA	NA	NA	NA	NA	NA	NA	NA	NA	6.0198	NA	NA	NA	NA	NA	NA	NA	31.5811
PGD_P1P2	6.57042	NA	13.3222	NA	7.2779	NA	19.7537	NA	NA	NA	NA	45.2213	NA	-31.3172	NA	NA	NA	NA	NA	NA	NA	NA	NA	NA	NA	NA	NA	NA	NA	NA	NA	NA	NA	28.7356	-15.2634	NA	NA	NA	NA	NA	22.5595	NA	13.1445	NA	NA	14.1565	-0.890614	NA	NA
SUPT20H_P1P2	12.7405	29.0997	18.6689	29.7307	-8.06165	29.637	9.03529	NA	NA	13.5755	NA	15.4276	NA	NA	NA	-3.32667	6.57969	NA	NA	NA	NA	NA	NA	NA	NA	NA	NA	NA	NA	NA	NA	NA	NA	NA	NA	NA	NA	NA	NA	NA	-9.66924	NA	2.34349	NA	NA	NA	NA	NA	NA
EXOC4_P1P2	41.0717	NA	37.5784	NA	NA	-7.04777	51.5116	NA	NA	NA	NA	71.0366	NA	-5.33537	NA	NA	NA	NA	NA	NA	NA	NA	NA	NA	NA	NA	NA	NA	NA	NA	NA	NA	NA	NA	NA	9.48323	NA	NA	NA	NA	6.40214	NA	NA	NA	NA	NA	NA	NA	NA
PPIL1_P1P2	16.1592	NA	20.4292	NA	NA	NA	19.1997	NA	NA	-3.86157	NA	15.6702	NA	-6.88804	NA	NA	NA	NA	NA	NA	NA	NA	NA	NA	NA	NA	NA	NA	NA	NA	NA	NA	NA	NA	NA	NA	NA	NA	NA	NA	8.98395	NA	NA	NA	NA	NA	NA	-17.2401	NA
COX6B1_P1P2	17.0984	-6.87386	27.3552	NA	NA	-9.15728	13.6723	NA	NA	NA	NA	31.2167	8.92865	-4.84329	NA	NA	NA	NA	NA	NA	NA	NA	NA	NA	NA	NA	NA	NA	NA	NA	NA	NA	NA	NA	NA	NA	-4.29052	NA	NA	NA	6.07988	NA	NA	NA	NA	NA	NA	NA	-27.6022
IDH3A_P1	8.1543	-4.67847	25.0858	NA	NA	-25.8623	12.1291	-7.44153	NA	NA	NA	21.4851	-20.1921	-39.94	NA	NA	NA	NA	NA	NA	NA	NA	NA	NA	NA	NA	NA	NA	NA	NA	NA	NA	NA	3.4588	NA	NA	NA	NA	NA	NA	NA	NA	NA	NA	NA	NA	NA	NA	NA
MIER1_P1	7.24448	NA	NA	NA	NA	NA	5.80843	NA	NA	NA	NA	NA	NA	NA	NA	NA	NA	NA	NA	NA	NA	NA	NA	NA	NA	NA	NA	NA	NA	NA	NA	NA	NA	NA	NA	NA	NA	NA	NA	NA	NA	NA	NA	NA	NA	NA	NA	NA	NA
SF3A3_P1P2	5.13416	NA	16.4431	NA	NA	NA	5.48016	NA	NA	NA	NA	16.2356	NA	-1.07132	NA	NA	NA	NA	NA	NA	NA	NA	NA	NA	NA	NA	NA	NA	NA	NA	NA	NA	NA	NA	NA	NA	NA	NA	NA	NA	NA	NA	NA	NA	NA	NA	NA	NA	NA
UHRF1_P1P2	12.3752	NA	11.2314	NA	-8.71821	NA	14.3655	NA	NA	NA	NA	54.8045	-29.4587	NA	NA	NA	9.66983	NA	NA	NA	NA	NA	NA	NA	NA	NA	NA	NA	NA	NA	NA	NA	NA	NA	NA	NA	NA	NA	NA	NA	NA	NA	NA	NA	NA	NA	NA	NA	NA
ZNF497_P1P2	2.04437	NA	NA	NA	NA	NA	NA	NA	NA	NA	NA	NA	NA	NA	NA	NA	NA	NA	NA	NA	NA	NA	NA	NA	NA	NA	NA	NA	NA	NA	NA	NA	NA	NA	NA	NA	NA	NA	NA	NA	NA	NA	NA	NA	NA	NA	NA	NA	NA
MRPL4_P1P2	15.7855	-12.4994	24.8296	2.89088	NA	-11.2526	27.3118	NA	NA	2.86264	NA	37.5641	NA	-2.75927	NA	NA	NA	NA	NA	NA	NA	NA	NA	NA	NA	NA	NA	NA	NA	NA	NA	NA	NA	4.79823	-3.20813	NA	NA	NA	NA	NA	NA	NA	NA	NA	NA	NA	-4.8339	-9.36863	NA
EMC2_P1P2	12.036	NA	30.5318	NA	-14.2938	23.4879	29.9465	-6.74199	NA	3.41358	NA	16.6439	17.5583	-2.43651	6.06887	NA	4.37852	NA	34.0916	-75.6253	-64.7819	-6.37564	NA	-40.7794	-97.3481	-64.0461	33.0256	-54.9989	-74.8819	-96.4925	-83.9589	-70.5275	-86.6827	NA	NA	NA	NA	NA	NA	NA	28.1145	-23.4619	NA	NA	NA	NA	NA	20.808	NA
TAF1D_P1	33.7468	-13.7915	36.4847	NA	-6.94197	-14.9783	41.6184	NA	NA	NA	NA	45.9747	NA	-3.84499	NA	NA	NA	NA	NA	NA	NA	NA	NA	NA	NA	NA	NA	NA	NA	NA	NA	NA	NA	NA	NA	6.88288	NA	NA	NA	NA	4.85927	NA	NA	NA	NA	NA	NA	NA	NA
LETM1_P1P2	8.17708	NA	7.95747	NA	NA	-6.54195	NA	NA	NA	NA	NA	14.9649	-24.8369	-7.92029	NA	NA	NA	NA	NA	NA	NA	NA	NA	NA	NA	NA	NA	NA	NA	NA	NA	NA	NA	NA	NA	NA	NA	NA	NA	NA	NA	NA	NA	NA	NA	NA	-12.5209	-10.2134	NA
GATAD1_P1P2	1.70541	NA	NA	NA	NA	NA	NA	2.62085	NA	NA	NA	NA	NA	NA	6.7643	NA	NA	NA	NA	NA	NA	NA	NA	NA	NA	NA	NA	NA	NA	NA	NA	NA	NA	NA	NA	NA	NA	NA	NA	NA	NA	NA	NA	NA	NA	NA	NA	NA	NA
PRPF19_P1P2	60.5092	NA	111.394	NA	NA	-29.1796	53.749	NA	NA	-9.24831	NA	91.3897	NA	-15.1634	NA	NA	8.80083	NA	NA	NA	NA	NA	NA	NA	NA	NA	NA	NA	NA	NA	NA	NA	NA	NA	NA	9.10537	NA	NA	NA	NA	95.8363	NA	NA	NA	NA	NA	NA	NA	NA
SASS6_P1P2	6.98238	NA	35.0041	NA	NA	NA	26.9028	NA	NA	NA	NA	41.0013	NA	-10.0698	NA	NA	NA	NA	NA	NA	NA	NA	NA	NA	NA	NA	NA	NA	NA	NA	NA	NA	NA	NA	NA	NA	NA	NA	NA	NA	NA	NA	NA	NA	NA	NA	NA	NA	NA
CEACAM16_ENST00000405314.2	2.46538	NA	NA	NA	NA	NA	NA	NA	NA	NA	NA	NA	NA	NA	NA	NA	NA	NA	NA	NA	NA	NA	NA	NA	NA	NA	NA	NA	NA	NA	NA	NA	NA	NA	NA	NA	NA	NA	NA	NA	NA	NA	NA	NA	NA	NA	NA	NA	NA
GTF2H1_P1P2	24.9357	NA	28.5912	NA	-8.2812	NA	17.2829	NA	NA	NA	NA	43.5598	NA	-11.6036	NA	NA	NA	NA	31.0066	-72.6331	-55.0515	-26.5756	-14.43	-30.4867	-71.5298	-51.7444	31.4526	-45.0953	-67.7248	-77.7189	-52.8243	-45.7823	-58.1272	NA	NA	NA	NA	NA	NA	NA	NA	3.77877	NA	NA	NA	NA	NA	NA	NA
CDCA8_P1P2	11.2239	NA	47.2883	NA	21.8066	NA	8.89914	NA	NA	NA	NA	55.8497	NA	NA	NA	NA	NA	NA	NA	NA	NA	NA	NA	NA	NA	NA	NA	NA	NA	NA	NA	NA	NA	30.56	NA	23.2746	NA	NA	NA	NA	74.2123	NA	-8.48379	NA	NA	NA	NA	NA	NA
C10orf111_P1P2	10.7876	NA	20.6499	NA	-8.98322	NA	23.2927	NA	NA	NA	NA	53.5938	-7.09737	-3.12606	NA	NA	NA	NA	NA	NA	NA	NA	NA	NA	NA	NA	NA	NA	NA	NA	NA	NA	NA	NA	NA	NA	NA	NA	NA	NA	NA	NA	NA	NA	NA	NA	5.42405	NA	NA
NFYB_P1P2	4.61182	NA	NA	NA	9.39215	NA	3.78336	NA	NA	-3.07641	NA	NA	NA	NA	NA	NA	NA	NA	NA	NA	NA	NA	NA	NA	NA	NA	NA	NA	NA	NA	NA	NA	NA	NA	NA	NA	NA	NA	NA	NA	NA	-7.17731	NA	NA	NA	NA	NA	NA	NA
ZBTB14_P1P2	26.6072	-4.36563	42.8554	NA	-6.34616	-5.8353	16.7874	NA	NA	NA	NA	54.2154	NA	NA	NA	NA	NA	NA	NA	NA	NA	NA	NA	NA	NA	NA	NA	NA	NA	NA	NA	NA	NA	NA	NA	NA	NA	NA	NA	NA	NA	NA	NA	NA	NA	NA	NA	NA	NA
KDM1A_P1P2	22.4793	NA	33.0496	NA	-7.68374	NA	14.4576	NA	NA	2.37875	NA	20.3168	-5.55626	NA	NA	NA	NA	NA	26.241	-32.2866	-36.3393	-30.5128	NA	-13.6682	-14.4761	-32.8316	27.7379	-26.4229	-50.6254	-52.9381	-8.58453	NA	-44.6391	NA	NA	NA	NA	NA	NA	NA	NA	NA	NA	NA	NA	NA	NA	NA	19.3565
MED24_P1P2	11.1905	NA	28.726	NA	-10.944	9.24448	12.8467	NA	NA	10.2812	NA	30.3948	NA	-4.04872	NA	NA	NA	NA	36.6011	-85.0923	-59.1584	-42.6135	-49.9099	-40.2781	-106.159	-69.2453	39.4642	-43.0138	-103.741	-95.1971	-98.6758	-74.1038	-89.2436	NA	-29.838	NA	NA	NA	NA	NA	-10.1438	15.3451	NA	NA	NA	NA	NA	NA	NA
MRPL52_P1P2	11.9982	-2.83715	16.3377	NA	NA	-1.68804	13.2372	NA	NA	NA	NA	12.2537	NA	NA	7.95255	NA	NA	NA	14.2237	-41.0905	-22.1143	-3.36153	NA	-7.54937	-19.2314	NA	18.2248	-22.0273	-25.2204	-38.2657	-31.8043	-20.3484	-24.4989	NA	NA	2.84638	-2.25582	NA	NA	NA	NA	NA	NA	NA	NA	NA	-5.09711	-24.6221	NA
LPHN3_P1P2	1.77059	NA	NA	NA	NA	NA	NA	NA	NA	NA	NA	NA	NA	NA	NA	NA	NA	NA	NA	NA	NA	NA	NA	NA	NA	NA	NA	NA	NA	NA	NA	NA	NA	NA	NA	NA	NA	1.60368	3.42282	NA	NA	NA	NA	NA	NA	NA	NA	NA	NA
MTERFD1_P1P2	34.3595	NA	44.2119	NA	NA	-37.2302	48.5935	NA	NA	9.03378	NA	60.0925	-8.09588	-5.83128	NA	NA	NA	NA	26.5426	-71.4722	-40.7079	NA	NA	-25.4662	-72.6643	-44.2981	35.1335	-55.4434	-59.6849	-88.9208	-71.4243	-45.8172	-52.9641	19.3651	NA	NA	NA	NA	NA	NA	NA	NA	NA	NA	NA	NA	-3.55904	-5.35134	NA
MED30_P1P2	76.6812	NA	146.235	4.81719	NA	NA	68.1637	NA	5.09548	34.579	NA	111.157	NA	-5.9031	NA	NA	NA	NA	NA	NA	NA	NA	NA	NA	NA	NA	NA	NA	NA	NA	NA	NA	NA	NA	NA	13.3509	-16.1184	NA	NA	NA	76.5867	NA	NA	NA	NA	NA	NA	NA	NA
UQCRQ_P1P2	7.45277	NA	22.6332	NA	NA	-7.79868	5.97956	NA	NA	NA	NA	25.5888	NA	-12.1235	NA	NA	NA	NA	NA	NA	NA	NA	NA	NA	NA	NA	NA	NA	NA	NA	NA	NA	NA	NA	NA	2.5119	-6.78108	NA	NA	NA	NA	NA	NA	NA	NA	-10.3156	NA	-5.45084	NA
CHEK2_P1P2	6.92344	NA	3.19321	NA	-2.12494	NA	21.3194	NA	NA	NA	NA	16.7538	-1.85671	NA	3.78931	NA	NA	NA	NA	NA	NA	NA	NA	NA	NA	NA	NA	NA	NA	NA	NA	NA	NA	NA	NA	-2.33044	NA	NA	NA	NA	NA	NA	NA	NA	NA	NA	1.89522	NA	NA
TRIP12_P1P2	4.57256	NA	5.21975	16.1317	NA	NA	2.56648	NA	NA	NA	NA	4.28682	5.73824	-8.86253	NA	NA	5.13613	NA	NA	NA	NA	NA	NA	NA	NA	NA	NA	NA	NA	NA	NA	NA	NA	NA	NA	NA	NA	NA	NA	NA	NA	NA	NA	NA	NA	NA	NA	NA	20.1997
AARS2_P1P2	30.8718	NA	29.8942	NA	NA	-25.0707	34.8777	NA	NA	2.12339	NA	56.3853	NA	-7.6002	NA	NA	NA	NA	32.7476	-56.5119	-42.1784	-10.5563	-11.4629	-24.8001	-70.1218	-44.5897	34.4169	-26.076	-62.667	-57.4354	-57.9898	-37.2116	-48.5928	2.69476	NA	NA	-6.72034	NA	NA	NA	21.7979	NA	NA	NA	NA	-16.9943	NA	-13.6779	NA
BCLAF1_P1P2	5.90501	NA	16.4928	NA	-10.1949	NA	14.2366	-9.95654	NA	NA	NA	8.58896	-4.29125	NA	NA	NA	NA	NA	NA	NA	NA	NA	NA	NA	NA	NA	NA	NA	NA	NA	NA	NA	NA	NA	NA	NA	NA	NA	NA	NA	NA	NA	-8.28972	NA	NA	NA	NA	NA	NA
ATP5J2_P1P2	34.0325	-2.13411	28.9661	NA	18.2844	-4.68949	28.4773	NA	NA	3.63187	NA	54.9275	NA	-9.47437	NA	NA	2.59945	13.9455	19.9827	-51.1339	-38.0386	-7.96945	-5.34941	-25.7955	-29.6053	NA	24.1595	-29.815	-35.8297	-43.4011	-46.252	-17.0615	-38.6542	NA	-4.29003	NA	-4.29732	NA	NA	NA	12.2579	NA	NA	NA	NA	NA	NA	NA	-18.3257
ATP5J2-PTCD1_P1	34.6543	-2.13411	28.9661	NA	18.2844	-3.55542	23.0386	NA	NA	3.71792	NA	NA	NA	NA	NA	NA	2.59945	13.9455	19.3556	-51.1339	-38.0386	-7.45187	-2.77042	-24.1724	-26.673	NA	24.3251	-29.815	-35.8297	-43.4011	-46.252	-17.0615	-38.6542	NA	-5.59077	NA	-4.29732	NA	NA	NA	13.7259	NA	NA	NA	NA	NA	NA	NA	NA
PTCD1_P1	34.0325	-1.53912	28.9661	NA	13.4749	-4.68949	28.4773	3.9282	2.33324	3.01902	NA	NA	NA	NA	9.37835	NA	NA	13.9455	25.3732	-51.1339	-38.0386	-5.7868	-4.50466	-20.9625	-31.0943	NA	24.605	-29.815	-35.8297	-43.4011	-46.252	-17.6016	-38.6542	NA	-4.29003	NA	NA	NA	NA	NA	7.85877	NA	2.57571	NA	NA	NA	-28.0211	-19.9301	NA
SSBP1_P1P2	63.3317	-29.7004	67.995	12.5627	NA	-29.7218	84.3656	NA	NA	29.4667	NA	84.6656	NA	-5.86469	14.2949	NA	NA	NA	46.1569	-51.0136	-40.3648	-5.76043	NA	-29.7623	-76.3277	-50.4942	43.3881	-35.6727	-70.9764	-41.7478	-70.9923	-46.9826	-52.604	NA	NA	NA	NA	NA	NA	NA	21.9751	NA	NA	NA	NA	NA	-6.91178	-24.9337	NA
CASC5_P1P2	12.793	NA	23.6149	NA	18.3593	NA	16.1536	NA	NA	NA	NA	66.7644	-4.16121	-9.19078	NA	NA	NA	NA	NA	NA	NA	NA	NA	NA	NA	NA	NA	NA	NA	NA	NA	NA	NA	NA	NA	NA	NA	NA	NA	NA	13.3246	NA	NA	NA	NA	NA	NA	NA	NA
HAUS5_P1P2	54.2758	NA	101.74	NA	31.9344	NA	55.6651	NA	NA	-8.27252	NA	73.0138	NA	NA	NA	NA	NA	NA	NA	NA	NA	NA	NA	NA	NA	NA	NA	NA	NA	NA	NA	NA	NA	79.8463	NA	8.89164	NA	NA	NA	NA	98.3976	NA	NA	NA	NA	NA	NA	NA	NA
DCTN5_P1P2	11.5785	NA	NA	NA	NA	NA	9.60465	7.80369	NA	NA	NA	16.6157	NA	NA	NA	NA	4.50061	NA	NA	NA	NA	NA	NA	NA	NA	NA	NA	NA	NA	NA	NA	NA	NA	NA	NA	NA	NA	NA	NA	NA	NA	NA	NA	NA	NA	NA	NA	NA	NA
NOL10_P1P2	18.0026	NA	30.1004	NA	-9.27458	NA	14.7921	29.0033	NA	NA	NA	47.3117	-13.7832	NA	NA	NA	NA	NA	NA	NA	NA	NA	NA	NA	NA	NA	NA	NA	NA	NA	NA	NA	NA	NA	NA	NA	NA	NA	NA	NA	NA	NA	NA	NA	NA	NA	NA	NA	NA
NAA50_P1P2	15.6582	-4.63978	9.37999	NA	-6.78245	-15.3387	22.1163	NA	NA	NA	NA	21.1131	-3.35716	23.6586	4.95083	NA	NA	NA	15.8594	-9.18159	-4.24337	-2.31951	0.170305	NA	-23.4079	NA	23.8437	3.53026	-9.54656	-10.2822	-13.4303	-7.2301	-17.144	NA	NA	NA	NA	NA	NA	NA	NA	NA	NA	NA	NA	NA	-4.10725	NA	NA
PPP1R35_P1P2	21.5236	NA	29.5776	NA	8.46595	NA	26.5552	2.35088	NA	NA	NA	18.656	NA	-8.62688	18.0934	NA	NA	NA	NA	NA	NA	NA	NA	NA	NA	NA	NA	NA	NA	NA	NA	NA	NA	NA	NA	NA	NA	NA	NA	NA	NA	NA	NA	NA	NA	NA	NA	NA	NA
CENPA_P2	60.5495	NA	105.675	NA	15.2605	NA	62.5276	21.9391	NA	-3.42425	NA	94.8498	NA	NA	NA	NA	NA	NA	NA	NA	NA	NA	NA	NA	NA	NA	NA	NA	NA	NA	NA	NA	NA	NA	NA	NA	NA	NA	NA	NA	77.5461	NA	-1.81123	NA	NA	NA	NA	NA	NA
CHTOP_P1P2	2.62876	NA	NA	NA	7.89618	NA	NA	NA	NA	NA	NA	NA	NA	NA	NA	NA	NA	NA	NA	NA	NA	NA	NA	NA	NA	NA	NA	NA	NA	NA	NA	NA	NA	NA	NA	NA	NA	NA	NA	NA	NA	NA	NA	NA	NA	NA	NA	NA	NA
PPA1_P1P2	37.9461	NA	44.0077	NA	NA	NA	37.4072	-0.931686	NA	2.54792	NA	77.0988	NA	-11.3572	NA	NA	5.45074	NA	NA	NA	NA	NA	NA	NA	NA	NA	NA	NA	NA	NA	NA	NA	NA	NA	NA	3.65953	-2.59361	NA	NA	NA	NA	NA	NA	NA	-9.26455	NA	NA	-4.37587	NA
VPS26A_P1P2	3.16183	NA	NA	NA	NA	NA	4.48944	NA	NA	NA	NA	NA	NA	NA	NA	NA	3.3256	NA	NA	NA	NA	NA	NA	NA	NA	NA	NA	NA	NA	NA	NA	NA	NA	NA	NA	NA	NA	NA	NA	NA	NA	NA	NA	NA	NA	NA	NA	NA	NA
NDUFV2_P1P2	5.20373	-2.82227	11.0013	NA	NA	-3.53527	12.0565	NA	NA	NA	NA	17.9288	8.13787	-6.93565	18.4849	NA	NA	NA	8.27479	-35.105	-25.1831	NA	NA	-8.25668	NA	NA	14.6714	-9.73392	-8.3033	-53.8177	-36.3406	-31.808	-24.6818	NA	NA	NA	NA	NA	NA	NA	NA	NA	NA	NA	NA	-15.6193	NA	NA	NA
HSPA5_P1P2	14.6917	48.6226	39.9146	NA	17.5413	57.5576	34.2075	NA	-7.01456	NA	NA	26.7962	NA	NA	NA	NA	NA	NA	NA	NA	NA	NA	NA	NA	NA	NA	NA	NA	NA	NA	NA	NA	NA	NA	NA	12.7218	NA	NA	NA	NA	NA	NA	NA	NA	NA	NA	NA	-7.89013	NA
ATP6V1A_P1P2	59.4944	NA	88.8243	-18.8844	23.1661	NA	76.5706	NA	NA	NA	NA	108.821	NA	-10.4997	NA	NA	NA	NA	NA	NA	NA	NA	NA	NA	NA	NA	NA	NA	NA	NA	NA	NA	NA	50.0585	NA	9.47438	-3.35048	NA	NA	NA	98.3656	NA	3.35984	NA	NA	NA	NA	NA	NA
ARMC7_P1P2	8.55918	NA	11.0569	NA	14.97	NA	7.27606	NA	NA	NA	NA	9.58356	NA	NA	NA	NA	NA	NA	NA	NA	NA	NA	NA	NA	NA	NA	NA	NA	NA	NA	NA	NA	NA	NA	NA	NA	NA	NA	NA	NA	NA	NA	NA	NA	NA	NA	NA	NA	NA
HAUS2_P1P2	7.4249	NA	20.3495	5.97152	NA	NA	9.2271	NA	NA	NA	NA	18.8619	NA	-3.09899	NA	NA	NA	NA	NA	NA	NA	NA	NA	NA	NA	NA	NA	NA	NA	NA	NA	NA	NA	NA	NA	6.29601	NA	NA	NA	NA	34.2394	NA	NA	NA	NA	NA	NA	NA	NA
RHOXF2B_ENST00000371402.2	7.71844	NA	2.99618	NA	-14.2924	10.1319	NA	NA	NA	23.3325	NA	NA	NA	NA	-2.20879	-1.97899	NA	6.72812	NA	NA	NA	NA	NA	NA	NA	NA	NA	NA	NA	NA	NA	NA	NA	NA	NA	NA	NA	NA	NA	NA	NA	NA	NA	NA	NA	NA	NA	NA	NA
CHCHD1_P1P2	5.46292	-4.89432	11.2587	NA	NA	-10.6497	9.40679	NA	NA	NA	NA	9.359	NA	NA	NA	NA	7.48544	NA	NA	NA	NA	NA	NA	NA	NA	NA	NA	NA	NA	NA	NA	NA	NA	NA	NA	NA	NA	NA	NA	NA	NA	NA	NA	NA	NA	NA	-3.484	NA	NA
RPL27_P1P2	14.2265	NA	71.746	NA	NA	NA	32.1208	12.1549	NA	NA	NA	68.1318	NA	NA	NA	NA	NA	NA	NA	NA	NA	NA	NA	NA	NA	NA	NA	NA	NA	NA	NA	NA	NA	NA	NA	14.0109	NA	NA	NA	NA	32.4343	NA	NA	NA	NA	NA	NA	NA	NA
ALG14_P1P2	4.80847	NA	5.74985	NA	NA	NA	10.7037	NA	NA	NA	NA	10.801	-7.72826	-7.0712	9.28182	NA	NA	NA	NA	NA	NA	NA	NA	NA	NA	NA	NA	NA	NA	NA	NA	NA	NA	NA	NA	NA	NA	NA	NA	NA	NA	NA	NA	NA	NA	NA	NA	-1.64623	NA
DDX46_P1	18.3327	NA	18.2492	NA	10.8734	NA	19.2993	NA	NA	NA	NA	23.0371	-2.77953	-9.97805	NA	NA	NA	NA	NA	NA	NA	NA	NA	NA	NA	NA	NA	NA	NA	NA	NA	NA	NA	NA	NA	4.02292	NA	NA	NA	NA	NA	NA	NA	NA	NA	NA	NA	NA	NA
ZNF574_P1	41.3332	-13.3087	77.9993	NA	-26.7592	-18.0417	38.9208	NA	6.95789	NA	NA	60.9461	-25.8658	-13.7569	NA	23.1802	NA	NA	NA	NA	NA	NA	NA	NA	NA	NA	NA	NA	NA	NA	NA	NA	NA	NA	NA	13.6186	NA	NA	NA	NA	NA	NA	NA	NA	NA	NA	NA	NA	NA
EIF3CL_ENST00000380876.4	22.1074	NA	33.5609	NA	25.6317	NA	13.8141	NA	NA	NA	NA	52.5845	NA	-6.6068	NA	NA	NA	NA	NA	NA	NA	NA	NA	NA	NA	NA	NA	NA	NA	NA	NA	NA	NA	NA	NA	10.0127	NA	NA	NA	NA	28.8234	NA	NA	NA	NA	NA	NA	NA	NA
LUC7L3_P1P2	20.4468	37.6571	40.0593	-21.0451	14.9792	41.2545	23.6264	NA	NA	2.33464	NA	23.4502	NA	-6.26319	6.21112	NA	NA	NA	NA	NA	NA	NA	NA	NA	NA	NA	NA	NA	NA	NA	NA	NA	NA	NA	NA	5.81927	NA	NA	NA	NA	NA	NA	NA	NA	NA	NA	NA	-44.3764	NA
NUTM1_P1P2	49.3434	NA	71.0383	NA	-54.4427	-18.3609	55.7551	9.79359	5.60771	13.0224	NA	91.3941	-22.238	-11.8284	NA	NA	NA	NA	NA	NA	NA	NA	NA	NA	NA	NA	NA	NA	NA	NA	NA	NA	NA	NA	NA	23.8023	-10.9236	NA	NA	NA	81.4898	NA	NA	NA	NA	NA	NA	NA	NA
PTDSS1_P1P2	14.1271	NA	20.1126	9.14106	NA	NA	23.7597	NA	NA	NA	NA	27.7952	-8.06653	-1.91257	5.35806	NA	NA	NA	NA	NA	NA	NA	NA	NA	NA	NA	NA	NA	NA	NA	NA	NA	NA	NA	NA	NA	NA	NA	NA	NA	12.2396	-3.30659	NA	NA	NA	NA	NA	-8.73748	NA
LSM12_P1P2	17.1182	NA	22.4943	NA	NA	NA	33.1361	-8.94172	NA	NA	NA	18.442	-2.82757	-7.92901	5.42016	NA	4.87873	NA	15.4605	-63.6583	-45.4839	-28.879	-24.8833	-28.5594	-68.6431	-42.2898	21.9746	-62.8223	-90.6716	-90.0227	-49.0895	-63.5515	-81.9827	NA	NA	NA	NA	NA	NA	NA	NA	NA	NA	NA	NA	NA	NA	NA	NA
PIK3C3_P1P2	1.44249	NA	NA	NA	NA	NA	NA	NA	NA	NA	NA	NA	NA	NA	NA	NA	2.30218	NA	NA	NA	NA	NA	NA	NA	NA	NA	NA	NA	NA	NA	NA	NA	NA	NA	NA	NA	NA	NA	NA	NA	NA	NA	NA	NA	NA	-15.7581	NA	NA	NA
ORC5_P1P2	48.4557	NA	81.9559	NA	-21.4921	-11.8822	58.3636	NA	3.60601	-9.14196	NA	93.037	-24.6285	NA	NA	NA	NA	NA	42.5155	-40.492	-39.1658	-7.3657	-14.6095	-22.3036	-48.8172	-37.8768	42.0597	-22.7288	-46.1775	-20.3682	-34.7186	-27.7185	-16.2532	NA	NA	6.92946	NA	NA	NA	NA	NA	NA	NA	NA	NA	NA	NA	NA	NA
RAET1L_P1P2	2.38049	NA	NA	NA	NA	NA	NA	NA	NA	NA	NA	NA	NA	NA	NA	NA	NA	NA	NA	NA	NA	NA	NA	NA	NA	NA	NA	NA	NA	NA	NA	NA	NA	NA	NA	NA	NA	NA	NA	NA	NA	NA	NA	NA	NA	NA	NA	NA	NA
LENG1_P1P2	3.62171	NA	NA	NA	NA	NA	NA	NA	NA	NA	NA	NA	NA	NA	NA	NA	NA	NA	NA	NA	NA	NA	NA	NA	NA	NA	NA	NA	NA	NA	NA	NA	NA	NA	NA	4.44852	NA	NA	NA	NA	6.95782	NA	NA	NA	NA	NA	NA	NA	12.9673
IZUMO2_P1P2	3.92357	NA	NA	NA	NA	NA	NA	NA	NA	NA	NA	NA	NA	NA	NA	NA	NA	NA	NA	NA	NA	NA	NA	NA	NA	NA	NA	NA	NA	NA	NA	NA	NA	NA	NA	NA	NA	NA	NA	NA	NA	NA	1.6825	NA	NA	NA	NA	NA	NA
LIG1_P1P2	3.93972	NA	11.9233	NA	NA	NA	9.37642	5.58617	NA	NA	NA	5.76733	NA	-15.6009	NA	NA	NA	NA	NA	NA	NA	NA	NA	NA	NA	NA	NA	NA	NA	NA	NA	NA	NA	NA	NA	NA	NA	NA	NA	NA	NA	NA	NA	NA	NA	NA	NA	NA	NA
TANGO6_P1P2	72.9315	NA	114.01	5.70838	NA	NA	81.2387	13.6824	NA	8.00125	NA	102.51	NA	NA	NA	NA	NA	NA	NA	NA	NA	NA	NA	NA	NA	NA	NA	NA	NA	NA	NA	NA	NA	NA	NA	3.65158	-6.92294	NA	NA	NA	NA	NA	1.56361	NA	NA	NA	NA	NA	NA
BBS9_P1P2	1.58775	NA	NA	NA	NA	NA	NA	NA	NA	NA	NA	NA	NA	NA	NA	NA	NA	NA	NA	NA	NA	NA	NA	NA	NA	NA	NA	NA	NA	NA	NA	NA	NA	NA	NA	NA	NA	NA	NA	NA	NA	NA	NA	NA	NA	NA	NA	NA	NA
MAP2K3_P1P2	2.88965	NA	15.1509	4.68852	-10.5239	NA	13.3954	-14.3971	NA	NA	NA	6.61575	6.84814	-1.7797	5.12953	NA	NA	NA	16.5479	-55.3752	-51.2386	-31.1156	-23.3664	-31.0934	-72.8615	-55.588	11.798	-47.6886	-65.3551	-72.9868	-47.1756	-25.9681	-57.8332	NA	NA	NA	NA	NA	NA	NA	NA	NA	NA	NA	NA	NA	NA	NA	NA
BCCIP_P1P2	10.9356	NA	23.1436	NA	-9.37663	NA	NA	NA	NA	1.75188	NA	65.5602	NA	NA	NA	NA	NA	NA	NA	NA	NA	NA	NA	NA	NA	NA	NA	NA	NA	NA	NA	NA	NA	NA	NA	3.76082	NA	NA	NA	NA	29.555	NA	NA	NA	NA	NA	NA	NA	NA
MAGOHB_P1P2	6.14924	NA	NA	NA	NA	NA	NA	NA	NA	NA	NA	NA	NA	NA	NA	NA	NA	NA	NA	NA	NA	NA	NA	NA	NA	NA	NA	NA	NA	NA	NA	NA	NA	NA	NA	NA	NA	NA	NA	NA	NA	NA	NA	NA	NA	NA	NA	NA	NA
C14orf166_P1P2	65.6767	NA	70.5175	NA	NA	-29.1253	60.4934	18.1359	NA	-4.55809	NA	69.4111	-32.3925	-11.8847	NA	NA	NA	NA	NA	NA	NA	NA	NA	NA	NA	NA	NA	NA	NA	NA	NA	NA	NA	NA	NA	NA	NA	NA	NA	NA	6.99115	NA	NA	NA	NA	NA	-4.32388	-8.24103	NA
RPAP3_P1P2	50.4484	NA	71.2985	19.6388	NA	NA	45.2303	NA	4.62606	NA	NA	77.8762	-8.68954	-10.9053	NA	NA	NA	NA	NA	NA	NA	NA	NA	NA	NA	NA	NA	NA	NA	NA	NA	NA	NA	63.3608	-47.8643	NA	-2.86216	NA	NA	NA	70.7135	NA	NA	NA	NA	NA	NA	NA	NA
MRGBP_P1P2	6.02321	NA	7.66102	NA	-41.1335	-4.668	10.4112	-9.61571	-2.9606	-13.1798	NA	18.9342	-16.099	-18.5595	NA	NA	NA	NA	11.3491	-59.4922	-34.9508	1.2586	NA	-28.7906	-56.7932	-36.8137	19.3748	-43.3105	-52.1729	-57.1863	-43.4783	-57.9035	-50.4714	9.85915	-2.52673	NA	NA	NA	NA	NA	31.3676	NA	NA	NA	NA	NA	NA	NA	NA
MTPAP_P1P2	47.9573	-9.44224	74.0775	NA	NA	-42.0616	50.2082	15.7913	NA	3.95619	NA	70.7307	NA	-15.4184	NA	NA	NA	NA	42.8316	-88.4094	-54.8478	-20.9636	-7.17837	-30.4093	-79.8713	-58.505	42.9967	-39.9186	-67.3129	-63.4436	-72.221	-33.0816	-41.3406	NA	-5.69374	NA	-6.40418	NA	NA	NA	26.6715	NA	NA	NA	NA	NA	-8.20501	-22.3848	NA
RIBC1_P1P2	43.5621	22.5446	81.1361	NA	20.5087	NA	33.5906	40.013	NA	-2.15112	NA	73.7803	NA	NA	NA	NA	NA	NA	NA	NA	NA	NA	NA	NA	NA	NA	NA	NA	NA	NA	NA	NA	NA	NA	NA	2.9887	NA	NA	NA	NA	NA	NA	NA	NA	NA	NA	NA	NA	NA
COPS7B_P1	4.33126	-8.77929	5.18312	16.1232	NA	-17.9279	12.5337	68.569	NA	NA	NA	3.80241	-5.66611	8.6028	NA	NA	NA	NA	NA	NA	NA	NA	NA	NA	NA	NA	NA	NA	NA	NA	NA	NA	NA	NA	NA	NA	NA	NA	NA	NA	NA	NA	NA	NA	NA	NA	NA	NA	NA
BUB1B_P1P2	32.0159	NA	47.6795	NA	NA	NA	31.5026	10.0147	NA	NA	NA	58.0261	-11.2619	NA	NA	NA	NA	NA	NA	NA	NA	NA	NA	NA	NA	NA	NA	NA	NA	NA	NA	NA	NA	NA	-12.1933	6.61253	NA	NA	NA	NA	100.876	NA	NA	NA	NA	NA	NA	NA	NA
POLR3K_P1P2	7.6667	NA	21.0871	NA	NA	-2.33135	13.207	NA	NA	NA	NA	22.8555	-3.94688	-3.70374	NA	NA	NA	NA	NA	NA	NA	NA	NA	NA	NA	NA	NA	NA	NA	NA	NA	NA	NA	NA	NA	NA	NA	NA	NA	NA	NA	NA	NA	NA	NA	NA	NA	NA	38.3074
TBCB_P1P2	44.876	NA	64.339	NA	NA	NA	46.1743	NA	NA	NA	NA	77.3329	NA	-42.6833	NA	NA	NA	NA	NA	NA	NA	NA	NA	NA	NA	NA	NA	NA	NA	NA	NA	NA	NA	NA	NA	NA	NA	NA	NA	NA	NA	NA	NA	NA	NA	NA	NA	NA	NA
OAZ3_P2	21.2169	-9.86539	32.3671	NA	NA	-13.1186	23.511	NA	NA	NA	NA	38.9098	NA	-8.39543	NA	NA	NA	NA	NA	NA	NA	NA	NA	NA	NA	NA	NA	NA	NA	NA	NA	NA	NA	NA	NA	NA	-1.87721	NA	NA	NA	NA	NA	NA	NA	NA	-9.57673	-1.67128	-14.2961	NA
NCAPG_P1P2	15.571	NA	21.852	NA	NA	NA	32.4031	NA	NA	NA	NA	19.693	NA	NA	NA	NA	NA	NA	NA	NA	NA	NA	NA	NA	NA	NA	NA	NA	NA	NA	NA	NA	NA	NA	NA	5.89192	NA	NA	NA	NA	13.3094	NA	-2.86234	NA	NA	NA	NA	NA	NA
FCGR2B_ENST00000403078.3	3.6307	NA	NA	NA	-2.34857	NA	NA	NA	NA	NA	NA	NA	NA	NA	NA	NA	NA	NA	NA	NA	NA	NA	NA	NA	NA	NA	NA	NA	NA	NA	NA	NA	NA	NA	NA	NA	NA	NA	NA	NA	NA	NA	NA	NA	NA	NA	NA	NA	NA
PPP4R2_P1P2	5.60498	8.92077	NA	4.36474	10.9095	2.73732	NA	NA	NA	NA	NA	NA	NA	NA	NA	NA	NA	NA	NA	NA	NA	NA	NA	NA	NA	NA	NA	NA	NA	NA	NA	NA	NA	NA	NA	NA	NA	NA	NA	NA	NA	NA	NA	NA	NA	NA	NA	NA	NA
EIF5B_P1P2	36.8185	NA	35.7792	NA	NA	NA	46.881	NA	NA	NA	NA	57.9509	NA	NA	NA	NA	NA	NA	NA	NA	NA	NA	NA	NA	NA	NA	NA	NA	NA	NA	NA	NA	NA	NA	NA	NA	NA	NA	NA	NA	NA	NA	NA	NA	NA	NA	NA	NA	NA
MED23_P1P2	19.9898	NA	28.4606	NA	-26.8314	28.3466	25.8854	NA	NA	27.6251	NA	18.2088	19.2779	-5.41943	7.08233	NA	11.2728	NA	32.4171	-89.5441	-86.0432	-82.4375	-62.5664	-55.8442	-130.495	-91.2796	26.2976	-66.2907	-124.348	-121.839	-89.8181	-72.4239	-110.519	NA	-19.4765	NA	NA	NA	NA	NA	NA	NA	NA	NA	NA	NA	NA	NA	NA
DNTTIP2_P1P2	41.1399	NA	68.6893	NA	NA	NA	31.4065	41.6221	NA	NA	NA	26.6363	NA	NA	NA	NA	NA	NA	NA	NA	NA	NA	NA	NA	NA	NA	NA	NA	NA	NA	NA	NA	NA	NA	NA	NA	NA	NA	NA	NA	16.9984	-4.58561	NA	NA	NA	NA	NA	NA	NA
FLCN_P1P2	6.64464	-4.42468	11.4629	NA	NA	NA	6.16666	NA	NA	2.39201	NA	13.9651	NA	-7.17847	NA	NA	NA	NA	NA	NA	NA	NA	NA	NA	NA	NA	NA	NA	NA	NA	NA	NA	NA	NA	NA	NA	NA	NA	NA	NA	NA	NA	NA	NA	NA	NA	NA	NA	-20.3335
CDC73_P1P2	28.4841	-2.00454	41.5101	NA	NA	-6.27817	24.1233	NA	NA	-6.72699	NA	26.981	NA	-9.19219	NA	NA	NA	NA	NA	NA	NA	NA	NA	NA	NA	NA	NA	NA	NA	NA	NA	NA	NA	NA	NA	NA	NA	NA	NA	NA	NA	NA	NA	NA	NA	NA	NA	NA	14.071
GTF3C3_P1P2	29.2402	NA	46.4915	NA	NA	-14.1783	36.888	NA	NA	-12.8532	NA	51.4043	NA	NA	NA	NA	NA	NA	29.4215	-28.1802	-8.06442	-7.9907	-7.91499	-8.40862	-15.6301	-24.8437	28.627	NA	-8.83161	NA	-28.4177	-19.0052	-30.5625	NA	NA	NA	NA	NA	NA	NA	NA	NA	NA	NA	NA	NA	NA	NA	NA
ZNF207_P1	26.0875	NA	54.2822	NA	19.4909	NA	27.8512	NA	NA	NA	NA	70.182	NA	NA	NA	NA	NA	NA	NA	NA	NA	NA	NA	NA	NA	NA	NA	NA	NA	NA	NA	NA	NA	30.2716	NA	5.62904	NA	NA	NA	NA	40.3717	NA	NA	NA	NA	NA	NA	NA	NA
TBP_P1P2	9.78516	NA	9.57576	NA	-17.724	NA	9.76097	NA	NA	NA	NA	12.2285	NA	NA	NA	NA	NA	NA	6.74738	-28.1446	-27.1384	4.27446	-11.9904	-13.2016	-15.1097	NA	13.0906	NA	-37.5201	-41.3278	-35.9439	-15.5635	-23.9574	NA	NA	NA	NA	NA	NA	NA	NA	NA	NA	NA	NA	NA	NA	NA	NA
ASUN_P1P2	10.1031	NA	25.7136	18.2848	NA	14.7634	17.7505	NA	NA	1.79784	NA	17.3522	-11.3048	-16.1078	7.91094	NA	NA	NA	NA	NA	NA	NA	NA	NA	NA	NA	NA	NA	NA	NA	NA	NA	NA	NA	NA	NA	NA	NA	NA	NA	NA	NA	NA	NA	NA	NA	NA	NA	NA
EXOSC6_P1P2	28.3019	NA	52.2835	NA	NA	NA	37.4391	18.5814	NA	-3.37801	NA	59.2651	NA	-13.98	NA	NA	NA	NA	27.8679	-41.1175	-26.7295	NA	NA	-13.3911	-43.83	-23.9577	39.6473	-13.3561	-52.0141	-45.5672	-36.7377	-25.8108	-39.2145	NA	NA	NA	NA	NA	NA	NA	16.1104	NA	NA	NA	NA	NA	NA	NA	NA
SPIN1_P1P2	4.56341	NA	8.91785	NA	NA	NA	NA	NA	NA	NA	NA	7.59507	NA	NA	NA	NA	NA	NA	NA	NA	NA	NA	NA	NA	NA	NA	NA	NA	NA	NA	NA	NA	NA	NA	NA	NA	NA	NA	NA	NA	NA	NA	NA	NA	NA	NA	NA	NA	1.90132
FTSJ3_P1P2	34.2981	NA	78.2607	NA	-31.5425	-11.8548	42.8134	4.91864	NA	NA	NA	69.7955	NA	-6.51057	NA	NA	NA	NA	42.185	-37.6416	-31.0453	NA	NA	-6.19176	-14.6572	-26.9265	42.3689	-13.8658	-33.4574	-52.5596	-6.16317	NA	-32.553	NA	NA	9.60722	NA	NA	NA	NA	86.8729	NA	NA	NA	NA	NA	NA	NA	NA
TBCE_P1P2	51.4689	NA	55.192	NA	NA	NA	69.8494	NA	NA	NA	NA	86.1409	NA	-10.0083	NA	NA	NA	NA	NA	NA	NA	NA	NA	NA	NA	NA	NA	NA	NA	NA	NA	NA	NA	9.13691	NA	8.72938	NA	NA	NA	NA	70.9672	NA	NA	NA	NA	NA	NA	-3.48813	NA
LSM4_P1P2	25.3403	NA	74.0565	NA	22.3881	NA	38.2751	6.92795	NA	-3.33605	NA	52.5115	-8.91929	NA	NA	NA	NA	NA	NA	NA	NA	NA	NA	NA	NA	NA	NA	NA	NA	NA	NA	NA	NA	28.1741	NA	9.6127	NA	NA	NA	NA	31.204	NA	NA	NA	NA	NA	NA	NA	NA
LRP8_P1P2	5.17485	NA	NA	NA	NA	NA	NA	NA	NA	NA	NA	NA	NA	NA	NA	NA	NA	NA	NA	NA	NA	NA	NA	NA	NA	NA	NA	NA	NA	NA	NA	NA	NA	NA	NA	NA	NA	NA	NA	NA	NA	NA	NA	NA	NA	NA	NA	NA	NA
UFM1_P1P2	8.47881	NA	11.0712	NA	12.5788	6.11154	22.6598	NA	NA	NA	NA	12.3266	-5.40608	NA	15.4528	NA	NA	NA	NA	NA	NA	NA	NA	NA	NA	NA	NA	NA	NA	NA	NA	NA	NA	NA	NA	NA	NA	NA	NA	NA	NA	NA	NA	NA	NA	NA	NA	NA	NA
CDK1_P1P2	16.1286	NA	55.2399	NA	33.716	NA	30.0135	12.8563	NA	-7.19884	NA	55.5296	-7.04495	NA	NA	NA	NA	NA	NA	NA	NA	NA	NA	NA	NA	NA	NA	NA	NA	NA	NA	NA	NA	34.8888	NA	NA	NA	NA	NA	NA	25.9215	NA	-1.62098	NA	NA	NA	NA	NA	NA
RPP21_P1P2	20.046	NA	35.9502	4.21501	NA	NA	33.444	NA	NA	-7.71255	NA	75.3209	-27.3548	-6.92062	NA	NA	NA	NA	NA	NA	NA	NA	NA	NA	NA	NA	NA	NA	NA	NA	NA	NA	NA	NA	NA	NA	NA	NA	NA	NA	NA	NA	NA	NA	NA	NA	NA	NA	NA
BPTF_P1P2	4.3432	NA	9.16893	NA	NA	-4.38726	NA	-4.7381	NA	5.84088	NA	NA	NA	NA	NA	NA	NA	NA	NA	NA	NA	NA	NA	NA	NA	NA	NA	NA	NA	NA	NA	NA	NA	NA	8.50768	NA	-3.57988	NA	NA	NA	23.4216	NA	NA	NA	NA	NA	NA	NA	NA
CENPC_P1P2	43.9898	NA	70.159	NA	11.0053	NA	45.6813	NA	NA	NA	NA	73.4417	NA	NA	NA	NA	NA	NA	NA	NA	NA	NA	NA	NA	NA	NA	NA	NA	NA	NA	NA	NA	NA	NA	NA	NA	NA	NA	NA	NA	19.2346	NA	NA	NA	NA	NA	NA	NA	NA
COASY_P1P2	7.90766	8.05742	21.6343	NA	NA	15.6635	20.3153	NA	NA	NA	NA	17.6974	NA	NA	8.69581	NA	7.72531	NA	NA	NA	NA	NA	NA	NA	NA	NA	NA	NA	NA	NA	NA	NA	NA	NA	NA	NA	NA	NA	NA	NA	10.2085	NA	NA	NA	NA	NA	NA	NA	29.1418
WDR77_P1P2	23.6536	NA	46.4081	-16.5119	14.2949	-16.4432	38.5788	NA	NA	8.52567	NA	68.3137	-28.7547	-15.5712	NA	NA	NA	NA	35.0376	-62.3792	-56.3271	5.8112	NA	-18.6946	-42.7657	-51.3516	37.3641	-32.5948	-68.6102	-105.931	-14.7607	-57.5202	-60.0211	NA	NA	NA	NA	NA	NA	NA	8.00113	NA	NA	NA	NA	NA	NA	NA	NA
XRCC6_P1P2	21.9997	NA	30.2945	NA	NA	NA	39.3125	-8.77519	4.18338	NA	NA	95.2265	NA	NA	NA	NA	NA	NA	NA	NA	NA	NA	NA	NA	NA	NA	NA	NA	NA	NA	NA	NA	NA	NA	NA	NA	-1.48894	NA	NA	NA	NA	NA	NA	NA	NA	NA	NA	NA	8.80837
ALKBH8_P1P2	4.23168	NA	13.8605	NA	-4.64883	-2.66322	19.6572	-4.0325	NA	-5.62445	NA	1.65769	NA	NA	19.3362	NA	7.9448	-5.81694	NA	NA	NA	NA	NA	NA	NA	NA	NA	NA	NA	NA	NA	NA	NA	NA	NA	NA	NA	NA	NA	NA	NA	9.765	NA	NA	NA	NA	NA	NA	NA
SLC25A36_P1P2	4.128	NA	6.79272	NA	NA	NA	NA	NA	NA	NA	NA	6.68461	NA	1.03329	19.1902	-12.7882	NA	NA	NA	NA	NA	NA	NA	NA	NA	NA	NA	NA	NA	NA	NA	NA	NA	NA	NA	NA	NA	NA	NA	NA	NA	NA	NA	NA	NA	NA	-3.51768	NA	NA
MED20_P1P2	5.6969	NA	8.91789	NA	NA	4.94266	NA	NA	NA	2.35358	NA	17.4524	NA	-7.7595	NA	NA	NA	NA	NA	NA	NA	NA	NA	NA	NA	NA	NA	NA	NA	NA	NA	NA	NA	NA	NA	NA	NA	NA	NA	NA	NA	NA	NA	NA	NA	NA	NA	NA	NA
TIMP4_P1P2	1.70772	NA	NA	NA	NA	NA	NA	NA	NA	NA	NA	NA	NA	NA	NA	NA	NA	NA	NA	NA	NA	NA	NA	NA	NA	NA	NA	NA	NA	NA	NA	NA	NA	NA	NA	NA	NA	NA	NA	NA	NA	NA	NA	NA	NA	NA	NA	NA	NA
HRH1_P2	2.6524	NA	NA	NA	NA	NA	NA	NA	NA	NA	NA	NA	NA	NA	NA	NA	NA	NA	NA	NA	NA	NA	NA	NA	NA	NA	NA	NA	NA	NA	NA	NA	NA	NA	NA	NA	NA	NA	NA	NA	NA	NA	NA	NA	NA	NA	NA	NA	NA
RAE1_P1P2	5.19259	NA	19.2249	6.26308	NA	3.83531	16.5039	NA	NA	NA	NA	22.1756	NA	-6.09248	NA	NA	NA	NA	NA	NA	NA	NA	NA	NA	NA	NA	NA	NA	NA	NA	NA	NA	NA	NA	NA	4.18848	NA	NA	NA	NA	NA	NA	NA	NA	NA	NA	NA	NA	NA
SNAPC1_P1P2	17.6608	NA	35.3712	6.01641	NA	NA	29.7074	-5.84961	NA	NA	NA	24.1917	-18.5596	-22.9986	NA	NA	NA	NA	NA	NA	NA	NA	NA	NA	NA	NA	NA	NA	NA	NA	NA	NA	NA	NA	NA	NA	NA	NA	NA	NA	NA	NA	NA	NA	NA	NA	NA	NA	NA
DAP3_P1P2	33.2361	-13.1242	45.3148	NA	NA	-29.4711	35.0665	NA	NA	7.67664	NA	58.0065	NA	-13.5294	NA	NA	NA	NA	33.2765	-63.3746	-41.4975	-15.3623	-12.3896	-29.4588	-77.5423	-47.4976	33.1126	-40.5144	-48.0464	-60.0293	-66.7172	-33.4181	-44.5317	NA	NA	2.24227	NA	NA	NA	NA	3.21009	NA	NA	NA	NA	NA	NA	NA	NA
RBBP5_P1P2	8.36274	NA	9.8665	-37.4759	27.974	NA	NA	NA	13.3476	-2.64959	NA	NA	NA	NA	NA	NA	NA	NA	NA	NA	NA	NA	NA	NA	NA	NA	NA	NA	NA	NA	NA	NA	NA	NA	NA	NA	-32.891	NA	NA	NA	NA	NA	NA	NA	NA	NA	NA	NA	NA
COX17_P1P2	14.4784	1.64857	17.2818	NA	NA	-9.18065	6.86581	NA	NA	NA	NA	19.7378	NA	-8.40256	NA	NA	NA	NA	14.9421	-45.3087	-33.3742	-6.76968	-10.485	-14.9693	-29.0659	-15.2054	22.4142	-29.8222	-47.8111	-51.194	-49.1815	-20.7553	-33.2323	NA	NA	NA	NA	NA	NA	NA	NA	NA	NA	NA	NA	NA	-3.52977	NA	NA
ATP6AP2_P1P2	8.65801	16.7346	7.83108	NA	20.5011	30.9267	8.87389	NA	NA	NA	NA	15.6103	-16.9637	-1.80501	NA	NA	NA	NA	NA	NA	NA	NA	NA	NA	NA	NA	NA	NA	NA	NA	NA	NA	NA	NA	NA	NA	NA	6.27371	2.43544	6.75043	NA	NA	2.84466	NA	NA	NA	NA	NA	NA
LEO1_P1P2	37.7664	-20.6814	60.675	-14.1961	NA	-25.5247	54.2494	12.8443	NA	-27.8198	NA	59.9717	-43.6961	-11.2014	11.6359	NA	NA	NA	NA	NA	NA	NA	NA	NA	NA	NA	NA	NA	NA	NA	NA	NA	NA	NA	NA	NA	NA	NA	NA	NA	18.4367	NA	NA	NA	NA	NA	NA	NA	NA
POLR1B_P1P2	26.8863	NA	75.7029	NA	NA	-7.98458	39.1045	NA	NA	4.91057	NA	82.4663	NA	NA	NA	NA	NA	NA	NA	NA	NA	NA	NA	NA	NA	NA	NA	NA	NA	NA	NA	NA	NA	12.638	NA	4.39428	NA	NA	NA	NA	58.0133	NA	NA	NA	NA	NA	NA	NA	NA
ATP6V1C1_P1P2	37.9859	NA	54.5924	-21.6758	NA	NA	41.8579	NA	NA	NA	NA	58.3059	-29.6027	-9.96339	NA	NA	NA	NA	40.7595	-29.9088	-29.2309	NA	NA	-11.3918	-27.0715	-19.824	44.2709	-12.1198	-47.3613	-49.9217	NA	-9.44758	-19.2937	NA	NA	NA	NA	NA	NA	NA	19.0407	-15.4903	NA	NA	NA	NA	NA	NA	NA
COG2_P1P2	19.3697	NA	46.6215	-7.32505	NA	NA	33.4949	NA	NA	NA	NA	67.1868	-27.7487	-15.695	NA	NA	NA	NA	NA	NA	NA	NA	NA	NA	NA	NA	NA	NA	NA	NA	NA	NA	NA	NA	NA	NA	-2.39733	NA	NA	NA	NA	2.05435	NA	NA	NA	NA	NA	NA	NA
EMC1_P1P2	7.02809	NA	8.74488	NA	-22.1895	NA	NA	NA	NA	NA	NA	19.1562	NA	-6.19672	NA	NA	NA	NA	NA	NA	NA	NA	NA	NA	NA	NA	NA	NA	NA	NA	NA	NA	NA	NA	NA	3.96643	NA	4.44658	3.17002	1.80542	NA	NA	NA	NA	NA	NA	NA	9.45719	NA
TUBGCP3_P1P2	30.9486	NA	61.5862	NA	18.9522	NA	27.5915	12.2064	NA	-2.19835	NA	60.2591	NA	NA	NA	NA	NA	NA	34.5808	NA	NA	NA	NA	NA	27.1472	-4.50039	35.6942	NA	8.65652	-13.1851	55.702	1.77356	NA	NA	NA	5.50214	NA	NA	NA	NA	65.7937	NA	NA	NA	NA	NA	NA	NA	NA
TRAPPC11_P1P2	26.9513	NA	48.3369	1.5555	NA	NA	22.1768	NA	NA	NA	NA	58.3614	-19.3792	-14.0084	NA	NA	NA	NA	NA	NA	NA	NA	NA	NA	NA	NA	NA	NA	NA	NA	NA	NA	NA	NA	NA	NA	NA	NA	NA	NA	NA	NA	4.3966	NA	NA	NA	NA	NA	NA
UROD_P1P2	6.54049	NA	NA	NA	NA	NA	5.19164	NA	NA	NA	NA	NA	NA	NA	NA	NA	NA	NA	NA	NA	NA	NA	NA	NA	NA	NA	NA	NA	NA	NA	NA	NA	NA	NA	NA	NA	NA	NA	NA	NA	9.6089	NA	NA	NA	NA	NA	NA	NA	NA
VBP1_P1P2	17.6813	NA	18.8152	26.1191	16.2415	NA	14.8318	30.9286	NA	NA	NA	8.81384	-5.40599	-5.04982	NA	NA	NA	NA	9.09276	7.50775	29.6971	92.9429	49.6831	14.5193	24.1645	NA	9.90752	NA	84.8504	-29.0088	50.6015	55.3532	-21.9312	NA	NA	5.86093	-3.41037	NA	NA	NA	35.4833	NA	NA	NA	NA	NA	NA	-6.9098	NA
BRF1_P1P2	35.6999	NA	48.1554	NA	-7.16151	-24.3669	35.8877	NA	NA	NA	NA	68.5543	-8.20508	-4.04387	NA	NA	NA	NA	NA	NA	NA	NA	NA	NA	NA	NA	NA	NA	NA	NA	NA	NA	NA	NA	NA	6.00514	NA	NA	NA	NA	NA	NA	NA	NA	NA	NA	NA	NA	NA
MRPS30_P1P2	26.8167	-5.9575	38.8227	NA	NA	-15.1271	24.0026	NA	NA	NA	NA	41.6992	NA	-4.76869	NA	NA	NA	NA	NA	NA	NA	NA	NA	NA	NA	NA	NA	NA	NA	NA	NA	NA	NA	NA	NA	NA	NA	NA	NA	NA	NA	NA	NA	NA	NA	NA	-6.09051	-10.7814	NA
CMTR1_P1P2	4.22679	NA	10.704	16.936	-1.90682	-10.7211	10.0557	NA	NA	NA	NA	11.1478	NA	NA	NA	NA	NA	NA	NA	NA	NA	NA	NA	NA	NA	NA	NA	NA	NA	NA	NA	NA	NA	NA	NA	NA	NA	NA	NA	NA	NA	NA	NA	NA	NA	NA	NA	NA	NA
EIF3D_P1P2	44.6755	NA	68.364	NA	0.467731	NA	31.5016	NA	NA	NA	NA	77.7248	NA	-6.87799	NA	NA	NA	NA	35.9612	-46.5588	-45.4701	NA	-12.3307	-21.0434	-37.2531	-47.9945	40.587	-42.3507	-59.3504	-101.986	-8.9252	-30.2525	-61.6123	23.2901	NA	6.92158	-4.72355	NA	NA	NA	52.1869	NA	NA	NA	NA	NA	NA	NA	NA
BRD8_P1P2	18.4463	-5.08754	35.9597	NA	9.90627	-25.4396	32.4539	-9.52915	NA	-27.1456	NA	44.236	NA	-22.7476	14.4979	NA	NA	NA	NA	NA	NA	NA	NA	NA	NA	NA	NA	NA	NA	NA	NA	NA	NA	NA	NA	NA	NA	NA	NA	NA	NA	NA	NA	NA	NA	NA	-2.79089	NA	NA
MKI67IP_P1P2	24.5099	NA	64.9946	NA	-20.2478	NA	33.5357	10.8596	NA	NA	NA	70.0426	NA	NA	NA	NA	NA	NA	NA	NA	NA	NA	NA	NA	NA	NA	NA	NA	NA	NA	NA	NA	NA	NA	NA	4.76556	NA	NA	NA	NA	39.948	NA	NA	NA	NA	NA	NA	NA	NA
SNRPD3_P1P2	35.6757	NA	73.5353	NA	NA	NA	44.6164	NA	NA	-6.77082	NA	85.0064	NA	NA	NA	NA	NA	NA	NA	NA	NA	NA	NA	NA	NA	NA	NA	NA	NA	NA	NA	NA	NA	11.7878	NA	10.8346	NA	NA	NA	NA	73.8369	NA	NA	NA	NA	NA	NA	NA	NA
KIAA0196_P1P2	3.94514	NA	2.85021	NA	NA	NA	NA	NA	NA	NA	NA	NA	NA	NA	NA	NA	NA	NA	NA	NA	NA	NA	NA	NA	NA	NA	NA	NA	NA	NA	NA	NA	NA	NA	NA	NA	NA	NA	NA	NA	NA	NA	NA	NA	NA	NA	-1.8362	NA	NA
VPS41_P1	5.99881	2.00565	12.879	NA	NA	21.7704	10.8535	NA	NA	NA	NA	11.7598	-6.95733	-7.41729	NA	NA	NA	NA	NA	NA	NA	NA	NA	NA	NA	NA	NA	NA	NA	NA	NA	NA	NA	16.2185	NA	NA	-7.03454	NA	NA	NA	NA	5.31882	NA	NA	NA	NA	NA	NA	NA
BCL2A1_P1P2	1.51102	NA	NA	NA	NA	NA	NA	NA	NA	NA	NA	NA	NA	NA	NA	NA	NA	NA	NA	NA	NA	NA	NA	NA	NA	NA	NA	NA	NA	NA	NA	NA	NA	NA	NA	NA	NA	NA	NA	NA	NA	NA	NA	NA	NA	NA	NA	NA	NA
UQCRFS1_P1P2	61.0461	NA	78.5084	NA	NA	NA	31.2025	9.85515	NA	NA	NA	68.8134	NA	-11.9053	NA	NA	NA	NA	NA	NA	NA	NA	NA	NA	NA	NA	NA	NA	NA	NA	NA	NA	NA	NA	NA	NA	-5.57936	NA	NA	NA	NA	NA	NA	NA	NA	NA	NA	NA	-16.6107
RBBP6_P1P2	11.9164	NA	8.60487	-20.0725	-3.34167	NA	21.1132	NA	NA	NA	NA	15.5949	NA	NA	NA	NA	NA	NA	NA	NA	NA	NA	NA	NA	NA	NA	NA	NA	NA	NA	NA	NA	NA	NA	NA	NA	NA	NA	NA	NA	NA	NA	NA	NA	NA	NA	NA	NA	NA
UVRAG_P1P2	3.88856	NA	NA	NA	NA	NA	NA	NA	NA	NA	NA	NA	NA	NA	NA	NA	NA	NA	NA	NA	NA	NA	NA	NA	NA	NA	NA	NA	NA	NA	NA	NA	NA	NA	NA	NA	NA	NA	NA	NA	NA	NA	NA	NA	NA	NA	NA	NA	NA
RPRD1B_P1P2	31.9577	-9.90218	35.372	-32.1698	-10.7695	-15.5429	41.2154	NA	NA	NA	NA	23.2499	-4.33231	-21.3176	9.62616	NA	7.84614	NA	NA	NA	NA	NA	NA	NA	NA	NA	NA	NA	NA	NA	NA	NA	NA	NA	NA	NA	NA	NA	NA	NA	NA	NA	1.47217	NA	NA	NA	NA	NA	NA
PSMD11_P1P2	13.1309	NA	27.2797	7.59898	42.7367	NA	10.941	18.5747	NA	-2.68922	NA	23.4004	7.56185	-7.55979	NA	NA	NA	NA	NA	NA	NA	NA	NA	NA	NA	NA	NA	NA	NA	NA	NA	NA	NA	76.606	NA	17.7535	NA	NA	NA	NA	75.9784	NA	NA	NA	NA	NA	NA	NA	NA
PPP3CB_P1P2	3.42291	NA	NA	NA	NA	NA	NA	NA	NA	NA	NA	NA	NA	NA	NA	NA	NA	NA	NA	NA	NA	NA	NA	NA	NA	NA	NA	NA	NA	NA	NA	NA	NA	NA	NA	NA	NA	NA	NA	NA	NA	NA	NA	NA	NA	NA	NA	NA	NA
CHMP2A_P1P2	42.9697	NA	86.1375	NA	12.9583	NA	55.7551	6.78083	NA	-13.358	NA	70.3986	NA	-6.39061	3.70891	NA	NA	NA	NA	NA	NA	NA	NA	NA	NA	NA	NA	NA	NA	NA	NA	NA	NA	NA	NA	20.1302	NA	NA	NA	NA	11.4619	NA	NA	NA	NA	NA	NA	NA	NA
SIPA1L2_P1P2	2.72413	NA	NA	NA	NA	NA	NA	NA	NA	NA	NA	NA	NA	NA	NA	NA	NA	NA	NA	NA	NA	NA	NA	NA	NA	NA	NA	NA	NA	NA	NA	NA	NA	NA	NA	NA	NA	NA	NA	NA	NA	NA	NA	NA	NA	NA	NA	NA	NA
MRPS6_P1P2	38.5624	-16.6517	34.5246	NA	NA	-10.2264	59.0666	NA	NA	NA	NA	63.227	-3.69041	-10.2087	NA	NA	NA	NA	NA	NA	NA	NA	NA	NA	NA	NA	NA	NA	NA	NA	NA	NA	NA	NA	-5.60805	NA	NA	NA	NA	NA	NA	NA	NA	NA	NA	NA	-5.51171	-13.4311	NA
CIRH1A_P1P2	13.9444	NA	36.4893	NA	-1.43117	NA	7.34821	29.9427	NA	NA	NA	23.3612	NA	NA	NA	NA	NA	NA	NA	NA	NA	NA	NA	NA	NA	NA	NA	NA	NA	NA	NA	NA	NA	NA	NA	NA	-2.35328	NA	NA	NA	20.3293	NA	NA	NA	NA	NA	NA	NA	NA
PRPF40A_P1P2	17.3165	NA	34.1726	13.1948	-12.4748	-3.89189	33.9532	NA	NA	NA	NA	26.1997	-22.2572	-2.45131	9.43361	NA	NA	NA	NA	NA	NA	NA	NA	NA	NA	NA	NA	NA	NA	NA	NA	NA	NA	NA	NA	5.60623	NA	NA	NA	NA	NA	NA	NA	NA	NA	NA	NA	NA	NA
PYURF_P1P2	6.15532	NA	NA	NA	NA	NA	NA	NA	NA	NA	NA	15.3125	NA	NA	NA	NA	NA	NA	NA	NA	NA	NA	NA	NA	NA	NA	NA	NA	NA	NA	NA	NA	NA	NA	NA	NA	NA	NA	NA	NA	6.22077	NA	NA	NA	NA	NA	-1.9509	NA	NA
PIGY_P1P2	6.15532	NA	NA	NA	NA	NA	NA	NA	NA	NA	NA	15.3125	NA	NA	NA	NA	NA	NA	NA	NA	NA	NA	NA	NA	NA	NA	NA	NA	NA	NA	NA	NA	NA	NA	NA	NA	NA	NA	NA	NA	6.22077	NA	NA	NA	NA	NA	-1.9509	NA	NA
SNX15_P1	23.0095	NA	33.7883	13.3892	21.0371	NA	34.0021	NA	NA	NA	NA	48.3558	NA	-4.28251	9.30755	NA	3.69776	NA	NA	NA	NA	NA	NA	NA	NA	NA	NA	NA	NA	NA	NA	NA	NA	NA	NA	NA	NA	NA	NA	NA	32.0845	NA	NA	NA	NA	NA	NA	-14.3161	NA
CARS_P1P2	38.2481	NA	76.2286	27.7458	NA	NA	56.477	NA	NA	12.2091	NA	72.2963	NA	-12.2504	NA	NA	NA	NA	NA	NA	NA	NA	NA	NA	NA	NA	NA	NA	NA	NA	NA	NA	NA	NA	NA	6.84707	NA	NA	NA	NA	22.5388	NA	NA	NA	NA	NA	NA	NA	NA
TEFM_P1P2	40.0688	-4.91202	42.6917	NA	5.95557	-9.09434	22.2277	NA	NA	NA	NA	66.2864	-9.5036	-6.46471	NA	NA	NA	NA	NA	NA	NA	NA	NA	NA	NA	NA	NA	NA	NA	NA	NA	NA	NA	NA	NA	NA	NA	NA	NA	NA	NA	NA	NA	NA	NA	NA	-8.27718	-23.7079	NA
ZCCHC7_P1P2	10.2018	-3.60567	4.77007	NA	-9.44435	NA	15.041	17.5453	NA	NA	NA	NA	NA	NA	9.27832	NA	NA	NA	NA	NA	NA	NA	NA	NA	NA	NA	NA	NA	NA	NA	NA	NA	NA	NA	NA	NA	NA	NA	NA	NA	NA	NA	NA	NA	NA	NA	NA	NA	NA
TBC1D31_P1P2	14.1824	NA	23.0052	NA	NA	-5.18035	25.2886	NA	NA	NA	NA	20.3511	NA	-5.23259	24.3955	NA	NA	NA	NA	NA	NA	NA	NA	NA	NA	NA	NA	NA	NA	NA	NA	NA	NA	NA	NA	NA	NA	NA	NA	NA	NA	NA	NA	NA	NA	NA	NA	NA	NA
INO80_P1P2	5.23663	-5.2091	13.8914	32.951	NA	-8.37767	14.4956	NA	5.81775	NA	NA	14.6799	-34.1325	NA	NA	9.22029	NA	NA	NA	NA	NA	NA	NA	NA	NA	NA	NA	NA	NA	NA	NA	NA	NA	NA	NA	NA	NA	NA	NA	NA	NA	NA	NA	NA	NA	NA	NA	NA	NA
ZMAT5_P1P2	43.9012	NA	70.8694	NA	NA	NA	43.1444	NA	NA	NA	NA	65.5145	NA	-4.59237	NA	NA	NA	NA	NA	NA	NA	NA	NA	NA	NA	NA	NA	NA	NA	NA	NA	NA	NA	85.0197	NA	NA	NA	NA	NA	NA	55.2942	NA	NA	NA	NA	NA	NA	NA	NA
ZFYVE19_P1P2	7.37136	NA	14.0998	NA	NA	NA	9.71285	NA	NA	NA	NA	21.8472	-11.9721	NA	NA	NA	NA	NA	NA	NA	NA	NA	NA	NA	NA	NA	NA	NA	NA	NA	NA	NA	NA	NA	NA	NA	NA	NA	NA	NA	9.30587	NA	NA	NA	NA	NA	NA	NA	NA
USE1_P1P2	36.1233	16.6151	34.3421	NA	NA	28.6693	33.3942	NA	NA	NA	NA	49.8016	NA	-8.76812	NA	NA	NA	NA	NA	NA	NA	NA	NA	NA	NA	NA	NA	NA	NA	NA	NA	NA	NA	NA	NA	8.44644	NA	NA	NA	NA	15.589	NA	NA	NA	NA	NA	NA	NA	NA
WDR74_P1	10.6193	NA	8.05107	NA	-11.9303	NA	NA	NA	NA	NA	NA	NA	NA	NA	NA	NA	NA	NA	NA	NA	NA	NA	NA	NA	NA	NA	NA	NA	NA	NA	NA	NA	NA	NA	NA	9.80848	NA	NA	NA	NA	10.3051	NA	NA	NA	NA	NA	NA	NA	NA
PSMA7_P1P2	25.8689	NA	32.3436	12.2796	15.9055	-5.85138	26.3383	38.8678	NA	NA	NA	39.7645	NA	-5.99698	NA	NA	NA	NA	26.1999	-40.4118	-30.778	5.22564	3.92458	-18.7081	-41.8083	-39.7457	28.7201	-34.7175	-46.2884	-72.5222	-11.1363	NA	-47.456	NA	NA	NA	NA	NA	NA	NA	5.34419	NA	NA	NA	NA	NA	NA	-17.5396	NA
PPP1R10_P1P2	10.0912	NA	32.8499	-4.19552	NA	5.78654	19.9415	NA	NA	NA	NA	15.97	-9.81888	-5.63059	NA	NA	NA	NA	18.0026	-29.3294	-37.8736	-8.10397	-19.5616	-13.3551	-33.517	-21.2736	27.0897	-16.7472	-61.8848	-48.4328	-43.9495	-7.25618	-45.9386	3.56158	NA	6.61301	NA	NA	NA	NA	NA	NA	NA	NA	NA	NA	NA	-9.50908	NA
TRIP13_P1P2	2.58068	NA	3.89067	NA	5.47239	NA	2.25825	NA	NA	NA	NA	6.39156	NA	-5.65344	NA	NA	NA	NA	7.60471	32.0934	-87.3912	29.9149	52.2954	4.2717	0.302219	-9.72485	12.3122	NA	-10.6645	-36.5548	44.1802	7.99449	15.6741	3.05982	NA	7.55509	NA	NA	NA	NA	30.2089	NA	NA	NA	NA	NA	NA	NA	NA
GABBR1_P1	1.99815	NA	NA	NA	NA	NA	NA	NA	NA	NA	NA	NA	NA	NA	NA	NA	NA	NA	NA	NA	NA	NA	NA	NA	NA	NA	NA	NA	NA	NA	NA	NA	NA	NA	NA	NA	NA	NA	NA	NA	NA	NA	NA	NA	NA	NA	NA	NA	NA
SFXN1_P1P2	15.439	-12.6382	25.9697	-2.631	-6.64819	-20.1495	22.6418	NA	NA	2.15807	NA	40.1194	-23.3239	-34.0657	7.25316	NA	NA	NA	17.0025	-54.7647	-52.0762	-33.2564	-22.0289	-22.5065	-55.9913	-31.0783	18.7713	-74.7874	-79.8807	-124.485	-55.7922	-43.8769	-58.3658	NA	NA	NA	NA	NA	NA	NA	NA	NA	NA	NA	NA	NA	-4.93503	NA	NA
CCNL1_P1P2	1.84755	NA	NA	NA	NA	NA	6.3965	-5.3176	NA	NA	NA	NA	NA	NA	NA	NA	NA	NA	NA	NA	NA	NA	NA	NA	NA	NA	NA	NA	NA	NA	NA	NA	NA	NA	NA	NA	NA	NA	NA	NA	2.29577	NA	NA	NA	NA	NA	NA	NA	NA
PSMD6_P1P2	42.8266	NA	73.6389	29.0395	38.3784	NA	31.8428	34.884	NA	-23.0039	NA	64.1056	NA	NA	NA	NA	NA	NA	NA	NA	NA	NA	NA	NA	NA	NA	NA	NA	NA	NA	NA	NA	NA	54.9508	NA	23.9872	NA	NA	NA	NA	107.883	NA	NA	NA	NA	NA	NA	NA	NA
USP5_P1	18.8981	NA	31.5583	11.4087	20.0795	NA	34.6755	NA	NA	NA	NA	63.767	NA	-11.1605	NA	NA	NA	NA	NA	NA	NA	NA	NA	NA	NA	NA	NA	NA	NA	NA	NA	NA	NA	NA	NA	NA	-2.44963	NA	NA	NA	NA	NA	NA	NA	NA	NA	-1.44998	-8.589	NA
LRR1_P1P2	6.26396	NA	6.67162	NA	NA	NA	13.7649	29.5337	NA	NA	NA	6.99994	NA	NA	NA	NA	NA	NA	NA	NA	NA	NA	NA	NA	NA	NA	NA	NA	NA	NA	NA	NA	NA	NA	NA	NA	NA	NA	NA	NA	NA	NA	NA	NA	NA	NA	NA	NA	NA
ELOF1_P1P2	10.686	-5.49413	23.6547	NA	NA	-17.0318	17.0341	NA	NA	-26.9119	NA	36.8009	-19.9061	NA	6.83708	NA	NA	NA	NA	NA	NA	NA	NA	NA	NA	NA	NA	NA	NA	NA	NA	NA	NA	NA	NA	NA	NA	NA	NA	NA	13.8589	NA	NA	NA	NA	NA	NA	NA	NA
SRSF10_P1P2	9.1563	-1.63748	22.205	NA	NA	-19.5985	30.1469	NA	10.0657	-15.2278	NA	17.2098	-12.4057	-9.69639	NA	8.69171	NA	NA	NA	NA	NA	NA	NA	NA	NA	NA	NA	NA	NA	NA	NA	NA	NA	3.94511	-5.90995	NA	-1.60209	NA	NA	NA	3.24778	NA	NA	NA	NA	NA	NA	NA	NA
POLR2A_P1P2	12.5223	NA	49.4689	NA	NA	NA	21.1365	NA	NA	NA	NA	51.0907	NA	-6.20469	NA	NA	NA	NA	NA	NA	NA	NA	NA	NA	NA	NA	NA	NA	NA	NA	NA	NA	NA	34.3475	NA	NA	NA	NA	NA	NA	NA	NA	NA	NA	NA	NA	NA	NA	NA
ANKRD17_P1P2	12.4501	NA	13.1083	-4.54733	0.0241838	NA	12.5508	NA	NA	NA	NA	25.4177	-3.06738	NA	NA	NA	NA	NA	NA	NA	NA	NA	NA	NA	NA	NA	NA	NA	NA	NA	NA	NA	NA	NA	NA	NA	NA	NA	NA	NA	NA	NA	NA	NA	NA	NA	NA	NA	NA
CS_P1P2	2.58457	NA	NA	NA	-5.49308	NA	3.79666	NA	NA	NA	NA	NA	NA	NA	31.5272	-14.8639	25.2997	NA	1.33283	-13.2294	NA	-1.18923	NA	NA	NA	NA	4.25007	0.247396	NA	NA	-27.6043	NA	NA	NA	NA	NA	NA	NA	NA	NA	5.19027	NA	NA	NA	NA	NA	NA	NA	NA
DPH5_P1P2	18.3419	NA	15.4084	-54.0781	NA	NA	26.5926	NA	NA	NA	NA	17.517	NA	NA	24.4278	NA	13.0787	NA	NA	NA	NA	NA	NA	NA	NA	NA	NA	NA	NA	NA	NA	NA	NA	NA	NA	NA	NA	NA	NA	NA	6.00733	NA	NA	NA	NA	6.27564	11.5872	10.4154	NA
KLRC4-KLRK1_P1P2	1.46473	NA	NA	NA	-3.54064	NA	NA	NA	NA	NA	NA	NA	NA	NA	NA	NA	NA	NA	NA	NA	NA	NA	NA	NA	NA	NA	NA	NA	NA	NA	NA	NA	NA	NA	NA	NA	NA	NA	NA	NA	NA	NA	NA	NA	NA	NA	NA	NA	NA
SGOL1_P1P2	39.0209	NA	62.1827	NA	29.7194	NA	44.1114	33.4992	NA	NA	NA	55.4523	-7.03394	NA	NA	NA	NA	NA	33.1651	50.1078	13.3672	65.66	44.015	NA	62.8115	23.946	34.0142	54.5528	28.8721	NA	46.837	42.9541	39.9326	33.9832	NA	29.6769	-11.3322	NA	NA	NA	100.088	NA	NA	NA	NA	NA	NA	NA	NA
MEMO1_P1	8.89416	5.12449	21.397	-31.424	28.4581	NA	5.38787	NA	15.2366	1.90095	NA	15.5482	NA	-30.5234	NA	NA	NA	NA	NA	NA	NA	NA	NA	NA	NA	NA	NA	NA	NA	NA	NA	NA	NA	NA	2.40385	-3.30056	-1.24482	NA	NA	NA	44.8856	NA	-2.71011	NA	NA	NA	NA	NA	NA
BRE_P1P2	3.26292	NA	NA	NA	NA	NA	NA	NA	NA	NA	NA	NA	NA	NA	NA	NA	NA	NA	NA	NA	NA	NA	NA	NA	NA	NA	NA	NA	NA	NA	NA	NA	NA	NA	NA	NA	NA	NA	NA	NA	NA	NA	NA	NA	NA	NA	NA	NA	NA
PWWP2A_P1P2	5.29983	-4.92777	NA	5.04425	NA	-6.14826	NA	NA	NA	2.79469	NA	NA	NA	NA	NA	NA	NA	NA	NA	NA	NA	NA	NA	NA	NA	NA	NA	NA	NA	NA	NA	NA	NA	NA	NA	NA	NA	NA	NA	NA	NA	NA	5.35194	NA	NA	NA	NA	NA	NA
CDK6_P1	13.0165	NA	26.6806	-4.70292	-3.71413	12.9535	19.8219	NA	NA	-14.0954	NA	12.378	19.6476	-4.03211	NA	NA	NA	NA	23.5085	-78.0131	-54.8252	-19.4898	-20.659	-34.8616	-96.6091	-52.8239	21.773	-73.4872	-87.1287	-127.643	-47.4875	-73.363	-70.2952	NA	NA	NA	NA	NA	NA	NA	NA	NA	NA	NA	NA	NA	NA	NA	NA
SRP72_P1P2	7.05037	NA	NA	NA	NA	NA	NA	NA	NA	NA	NA	NA	NA	NA	NA	NA	NA	NA	NA	NA	NA	NA	NA	NA	NA	NA	NA	NA	NA	NA	NA	NA	NA	NA	NA	NA	NA	NA	NA	NA	NA	NA	3.30225	NA	NA	NA	NA	3.67288	NA
NOC2L_P1P2	10.8167	NA	30.5429	NA	-11.3015	-3.20649	10.2889	5.80239	NA	NA	NA	20.4301	NA	4.17807	NA	NA	NA	NA	NA	NA	NA	NA	NA	NA	NA	NA	NA	NA	NA	NA	NA	NA	NA	NA	NA	NA	NA	NA	NA	NA	13.9698	NA	NA	NA	NA	NA	NA	NA	NA
ERCC4_P1	7.84967	NA	2.31062	NA	NA	NA	NA	NA	NA	-1.43946	NA	NA	NA	NA	NA	NA	NA	NA	NA	NA	NA	NA	NA	NA	NA	NA	NA	NA	NA	NA	NA	NA	NA	NA	NA	NA	NA	NA	NA	NA	NA	NA	NA	NA	NA	NA	NA	NA	NA
DNAJC24_P1P2	14.7348	NA	20.4368	-88.3204	37.3116	NA	19.3433	4.78091	NA	-2.17211	NA	11.5689	13.2724	NA	11.6343	NA	4.75349	NA	NA	NA	NA	NA	NA	NA	NA	NA	NA	NA	NA	NA	NA	NA	NA	7.29438	-9.43033	NA	NA	NA	NA	NA	18.948	NA	NA	NA	NA	NA	NA	NA	NA
ZBTB16_P1P2	4.60533	NA	7.13944	NA	NA	NA	NA	NA	NA	NA	NA	18.1221	NA	NA	NA	NA	NA	NA	NA	NA	NA	NA	NA	NA	NA	NA	NA	NA	NA	NA	NA	NA	NA	NA	NA	NA	NA	NA	NA	NA	NA	NA	NA	NA	NA	NA	NA	NA	NA
RPS2_P1P2	7.87841	NA	15.5984	NA	NA	NA	17.0118	17.4378	NA	NA	NA	16.1168	NA	NA	NA	NA	NA	NA	NA	NA	NA	NA	NA	NA	NA	NA	NA	NA	NA	NA	NA	NA	NA	NA	NA	15.2879	-6.29753	NA	NA	NA	NA	NA	NA	NA	NA	NA	4.93444	NA	NA
OR1B1_ENST00000304833.3	1.7773	NA	NA	NA	NA	NA	NA	NA	NA	NA	NA	NA	NA	NA	NA	NA	NA	NA	NA	NA	NA	NA	NA	NA	NA	NA	NA	NA	NA	NA	NA	NA	NA	NA	NA	NA	NA	NA	NA	NA	NA	NA	NA	NA	NA	NA	NA	NA	NA
NSUN4_P1P2	12.9397	-4.78036	11.8495	NA	NA	-24.0261	17.3815	NA	NA	NA	NA	19.3527	-3.88509	-5.62757	NA	NA	NA	NA	NA	NA	NA	NA	NA	NA	NA	NA	NA	NA	NA	NA	NA	NA	NA	NA	NA	NA	NA	NA	NA	NA	NA	NA	NA	NA	NA	NA	NA	NA	NA
RRP15_P1P2	23.8139	NA	61.7853	NA	-7.40605	NA	25.344	NA	NA	NA	NA	55.5982	NA	NA	NA	NA	NA	NA	NA	NA	NA	NA	NA	NA	NA	NA	NA	NA	NA	NA	NA	NA	NA	NA	NA	4.24496	NA	NA	NA	NA	18.3201	NA	NA	NA	NA	NA	NA	NA	NA
CMIP_P1P2	14.6974	NA	35.1405	NA	26.0408	-3.12981	26.4583	NA	NA	NA	NA	47.6231	NA	-11.8457	NA	NA	NA	NA	NA	NA	NA	NA	NA	NA	NA	NA	NA	NA	NA	NA	NA	NA	NA	NA	NA	NA	NA	NA	NA	NA	NA	NA	NA	NA	NA	NA	NA	NA	NA
SF3B4_P1P2	34.7897	NA	45.4815	NA	21.6071	NA	27.1433	NA	2.00689	NA	NA	19.5157	NA	-2.69161	NA	NA	NA	NA	NA	NA	NA	NA	NA	NA	NA	NA	NA	NA	NA	NA	NA	NA	NA	NA	NA	9.18266	NA	NA	NA	NA	52.8872	-6.56827	NA	NA	NA	NA	-3.07815	NA	NA
NOLC1_P1P2	12.9943	NA	19.3795	NA	NA	NA	15.2279	4.887	NA	NA	NA	20.2323	-9.31224	NA	NA	NA	NA	NA	NA	NA	NA	NA	NA	NA	NA	NA	NA	NA	NA	NA	NA	NA	NA	NA	NA	9.49505	NA	NA	NA	NA	15.6026	NA	NA	NA	NA	NA	NA	NA	6.75064
ATP5H_P1P2	6.65742	NA	34.4012	NA	NA	-3.03708	8.59468	NA	NA	NA	NA	50.5632	-3.64158	-7.00807	4.75155	NA	5.02145	19.9015	NA	NA	NA	NA	NA	NA	NA	NA	NA	NA	NA	NA	NA	NA	NA	NA	NA	NA	NA	NA	NA	NA	NA	NA	13.5792	NA	NA	NA	-1.84661	-28.2778	NA
UBE2T_P1P2	7.43031	NA	8.11652	9.49206	NA	NA	14.2928	5.55864	NA	-3.06823	NA	11.2314	NA	26.3591	11.6152	NA	NA	NA	NA	NA	NA	NA	NA	NA	NA	NA	NA	NA	NA	NA	NA	NA	NA	NA	NA	NA	NA	NA	NA	NA	NA	NA	-2.05545	NA	NA	NA	NA	NA	NA
RPL10_P1P2	53.3649	NA	66.9583	NA	NA	NA	29.7794	13.541	NA	NA	NA	61.3849	NA	NA	NA	NA	NA	NA	NA	NA	NA	NA	NA	NA	NA	NA	NA	NA	NA	NA	NA	NA	NA	NA	NA	4.68342	NA	NA	NA	NA	20.6927	NA	NA	NA	NA	NA	NA	NA	NA
NUBP1_P1P2	26.2347	NA	50.5874	NA	9.84424	3.10296	39.9414	NA	NA	-2.73653	NA	69.2783	NA	NA	NA	NA	NA	NA	NA	NA	NA	NA	NA	NA	NA	NA	NA	NA	NA	NA	NA	NA	NA	16.756	NA	12.5279	NA	NA	NA	NA	74.2771	NA	NA	NA	NA	NA	NA	NA	NA
ALDOA_P1P2	10.9223	NA	21.3486	NA	NA	NA	25.0082	NA	NA	NA	NA	24.6567	NA	-24.8104	NA	NA	NA	NA	NA	NA	NA	NA	NA	NA	NA	NA	NA	NA	NA	NA	NA	NA	NA	NA	NA	NA	NA	NA	NA	NA	NA	NA	NA	NA	NA	NA	NA	NA	15.984
LPPR2_P1P2	8.05292	NA	NA	NA	NA	NA	NA	NA	NA	NA	NA	30.8041	NA	NA	NA	NA	NA	NA	NA	NA	NA	NA	NA	NA	NA	NA	NA	NA	NA	NA	NA	NA	NA	NA	NA	NA	NA	NA	NA	NA	NA	NA	NA	NA	NA	NA	NA	NA	NA
NEMF_P1P2	10.899	NA	30.3746	NA	-18.3915	-0.105715	28.9933	NA	NA	-74.0003	NA	17.1979	-15.0167	-6.44475	15.279	NA	NA	NA	NA	NA	NA	NA	NA	NA	NA	NA	NA	NA	NA	NA	NA	NA	NA	NA	NA	NA	NA	NA	NA	NA	NA	NA	NA	NA	NA	NA	NA	NA	NA
DIEXF_P1P2	32.5257	-5.71921	48.0906	NA	-10.037	-24.8316	26.419	32.3235	NA	1.8181	NA	45.0525	NA	-10.5735	NA	NA	NA	NA	NA	NA	NA	NA	NA	NA	NA	NA	NA	NA	NA	NA	NA	NA	NA	NA	NA	8.76596	NA	NA	NA	NA	15.8715	NA	NA	NA	NA	NA	NA	NA	NA
BUB1_P1P2	21.2584	NA	36.4168	NA	26.0661	NA	31.3452	NA	NA	NA	NA	22.2546	NA	-3.26119	8.35799	NA	10.3225	NA	29.7774	NA	15.5467	42.1872	38.1241	NA	0.901515	5.38234	30.1846	NA	46.4643	-21.4339	21.2679	-20.684	5.94125	NA	NA	3.27408	NA	NA	NA	NA	9.93256	NA	NA	NA	NA	NA	NA	NA	NA
TOMM70A_P1P2	3.10023	NA	4.99433	NA	-6.49326	NA	14.4589	NA	NA	NA	NA	13.1423	NA	-3.67001	17.0114	-10.8703	10.4699	NA	NA	NA	NA	NA	NA	NA	NA	NA	NA	NA	NA	NA	NA	NA	NA	NA	NA	NA	NA	NA	NA	NA	NA	NA	NA	NA	NA	NA	-7.42706	-11.5732	NA
PIBF1_P1P2	1.55308	NA	NA	NA	NA	NA	NA	NA	NA	NA	NA	NA	NA	NA	NA	NA	NA	NA	NA	NA	NA	NA	NA	NA	NA	NA	NA	NA	NA	NA	NA	NA	NA	NA	NA	NA	NA	NA	NA	NA	NA	NA	NA	NA	NA	NA	NA	NA	NA
TBK1_P1P2	3.96689	NA	NA	NA	2.73396	NA	NA	NA	NA	NA	NA	NA	NA	NA	NA	NA	NA	NA	NA	NA	NA	NA	NA	NA	NA	NA	NA	NA	NA	NA	NA	NA	NA	NA	NA	NA	NA	NA	NA	NA	NA	NA	NA	NA	NA	NA	NA	NA	NA
ZNF518A_P1P2	8.25308	NA	8.79033	NA	-2.12647	16.0766	NA	NA	NA	NA	NA	7.51403	NA	NA	NA	NA	NA	NA	15.0798	-38.4526	-37.5601	-35.4014	-17.6072	-24.3978	-50.7514	-15.8813	13.8174	-27.1238	-48.4857	-49.1976	-43.9018	-27.9385	-33.5422	NA	NA	NA	NA	NA	NA	NA	NA	NA	NA	NA	NA	NA	NA	NA	NA
HAUS6_P1P2	38.1587	NA	49.7392	NA	24.7588	NA	23.9991	28.0194	NA	NA	NA	24.9021	NA	NA	NA	NA	NA	NA	NA	NA	NA	NA	NA	NA	NA	NA	NA	NA	NA	NA	NA	NA	NA	NA	NA	4.53756	NA	NA	NA	NA	NA	NA	NA	NA	NA	NA	NA	NA	NA
STAT5B_P1P2	20.1635	NA	61.9674	NA	-10.0339	NA	30.3419	NA	NA	NA	NA	33.4609	NA	-8.47275	NA	NA	NA	NA	44.941	-81.4605	-75.4164	-58.5303	-39.148	-33.1078	-89.3905	-67.892	36.5395	-58.1335	-131.87	-132.32	-92.4272	-53.4565	-111.804	NA	NA	NA	NA	NA	NA	NA	NA	NA	NA	NA	NA	NA	NA	NA	NA
DTL_P1P2	25.7332	NA	45.8045	NA	25.9748	NA	22.811	64.3189	NA	NA	NA	29.5588	NA	-2.20118	NA	NA	NA	NA	NA	NA	NA	NA	NA	NA	NA	NA	NA	NA	NA	NA	NA	NA	NA	20.3145	NA	NA	NA	NA	NA	NA	44.227	-4.74308	NA	NA	NA	NA	NA	NA	NA
EEF1G_P1P2	19.0511	NA	26.855	NA	8.70809	NA	25.2974	NA	NA	NA	NA	68.1743	-11.0609	-5.18582	NA	NA	NA	NA	NA	NA	NA	NA	NA	NA	NA	NA	NA	NA	NA	NA	NA	NA	NA	NA	NA	NA	NA	NA	NA	NA	NA	NA	1.48815	NA	NA	NA	NA	-8.16738	NA
CDAN1_P1P2	42.2201	NA	51.4734	4.17326	NA	NA	41.3788	NA	NA	NA	NA	73.372	NA	9.22442	NA	NA	9.83042	NA	NA	NA	NA	NA	NA	NA	NA	NA	NA	NA	NA	NA	NA	NA	NA	NA	NA	NA	-3.28555	NA	NA	NA	NA	NA	-3.0047	NA	NA	NA	NA	NA	NA
ERCC3_P1P2	7.20227	NA	19.3809	NA	-4.25144	NA	11.3531	NA	NA	NA	NA	36.5701	-15.1203	-20.5499	NA	NA	NA	NA	18.136	-66.7558	-55.4562	-16.3144	-12.9608	-29.3542	-59.9092	-21.1396	23.6751	-44.0027	-75.3824	-72.3846	-39.2331	-43.3113	-53.8285	NA	NA	NA	NA	NA	NA	NA	NA	NA	NA	NA	NA	NA	NA	NA	3.36978
CDC6_P1P2	33.1102	NA	37.5782	NA	20.8883	NA	34.0025	-5.8149	NA	NA	NA	26.4958	NA	NA	NA	NA	NA	NA	NA	NA	NA	NA	NA	NA	NA	NA	NA	NA	NA	NA	NA	NA	NA	NA	NA	18.0712	NA	NA	NA	NA	10.7775	NA	NA	NA	NA	NA	NA	NA	NA
GNL3_P1P2	19.9584	NA	30.85	8.41734	-17.1427	-4.86674	23.0489	6.45023	NA	NA	NA	27.2659	NA	NA	NA	NA	NA	NA	NA	NA	NA	NA	NA	NA	NA	NA	NA	NA	NA	NA	NA	NA	NA	22.5322	-16.265	8.10624	NA	NA	NA	NA	29.0244	NA	NA	NA	NA	NA	NA	NA	NA
XAB2_P1P2	22.6648	NA	43.0998	NA	NA	NA	21.1455	NA	NA	NA	NA	24.5058	NA	NA	NA	NA	NA	NA	NA	NA	NA	NA	NA	NA	NA	NA	NA	NA	NA	NA	NA	NA	NA	NA	NA	8.52264	NA	NA	NA	NA	53.8009	NA	NA	NA	NA	NA	NA	NA	NA
INCENP_P1P2	46.5776	NA	101.115	NA	39.2284	NA	38.6734	13.3245	NA	-8.72972	NA	79.4777	NA	NA	NA	NA	NA	NA	NA	NA	NA	NA	NA	NA	NA	NA	NA	NA	NA	NA	NA	NA	NA	102.06	NA	12.4139	NA	NA	NA	NA	98.3365	NA	-2.69318	NA	NA	NA	NA	NA	NA
NLRP6_P1P2	3.42318	NA	NA	NA	NA	NA	NA	NA	NA	NA	NA	NA	NA	NA	NA	NA	NA	NA	NA	NA	NA	NA	NA	NA	NA	NA	NA	NA	NA	NA	NA	NA	NA	NA	NA	NA	NA	NA	NA	NA	NA	NA	2.25155	NA	NA	NA	NA	NA	NA
PCID2_P1	6.63544	NA	17.4176	NA	7.93402	NA	12.3419	4.61132	NA	NA	NA	19.0809	NA	-7.53785	NA	NA	NA	NA	NA	NA	NA	NA	NA	NA	NA	NA	NA	NA	NA	NA	NA	NA	NA	NA	NA	NA	NA	NA	NA	NA	NA	NA	NA	NA	NA	NA	NA	NA	10.8995
YAE1D1_P1P2	37.9966	NA	57.2185	NA	NA	NA	36.4619	19.4684	NA	NA	NA	59.7811	-5.13637	-8.75241	NA	NA	NA	NA	NA	NA	NA	NA	NA	NA	NA	NA	NA	NA	NA	NA	NA	NA	NA	NA	NA	NA	NA	NA	NA	NA	6.01437	NA	NA	NA	NA	NA	NA	NA	NA
WBSCR16_P1P2	5.79428	NA	4.30614	NA	NA	-5.65943	8.57849	NA	NA	NA	NA	6.49145	NA	NA	NA	NA	NA	NA	NA	NA	NA	NA	NA	NA	NA	NA	NA	NA	NA	NA	NA	NA	NA	NA	NA	NA	NA	NA	NA	NA	NA	NA	NA	NA	NA	NA	-13.9889	-12.2387	NA
MRPL12_P1P2	29.9422	NA	48.7081	NA	4.75312	-22.7019	37.0084	NA	NA	NA	NA	62.3419	NA	-8.41803	NA	NA	NA	NA	NA	NA	NA	NA	NA	NA	NA	NA	NA	NA	NA	NA	NA	NA	NA	NA	NA	NA	NA	NA	NA	NA	NA	NA	NA	NA	NA	NA	-4.8883	-11.0969	NA
SLC25A10_P1P2	31.7606	-3.88958	48.7081	NA	4.75312	-16.6691	37.0084	NA	NA	NA	NA	62.3419	NA	-8.41803	NA	NA	NA	NA	28.9502	-59.8931	-46.5801	-11.7195	-8.46536	-24.5116	-78.1296	-42.2945	36.2057	-35.0057	-40.5005	-59.8328	-62.8384	-36.9505	-36.5712	NA	NA	NA	-5.41172	NA	NA	NA	NA	NA	NA	NA	NA	NA	-2.31094	-21.11	NA
ARL1_P1P2	6.10167	NA	14.7298	-18.3009	NA	-10.7985	14.6869	NA	NA	NA	NA	8.42785	-10.9333	-2.02087	NA	NA	NA	NA	NA	NA	NA	NA	NA	NA	NA	NA	NA	NA	NA	NA	NA	NA	NA	NA	NA	NA	NA	NA	NA	NA	NA	NA	8.46302	NA	NA	19.1499	NA	NA	NA
OR2J2_ENST00000377167.2	2.09823	NA	NA	NA	NA	NA	NA	NA	NA	NA	NA	NA	NA	NA	NA	NA	NA	NA	NA	NA	NA	NA	NA	NA	NA	NA	NA	NA	NA	NA	NA	NA	NA	NA	NA	NA	NA	NA	NA	NA	NA	NA	1.67994	NA	NA	NA	NA	NA	NA
EIF3F_P1P2	16.1882	NA	37.5327	NA	13.2262	NA	24.9844	NA	NA	NA	NA	49.1865	NA	-14.5824	NA	NA	NA	NA	NA	NA	NA	NA	NA	NA	NA	NA	NA	NA	NA	NA	NA	NA	NA	NA	NA	NA	NA	NA	NA	NA	NA	NA	NA	NA	NA	NA	3.55361	NA	NA
GEMIN4_P1P2	34.818	NA	50.5395	NA	NA	NA	43.6618	NA	NA	NA	NA	52.8959	-24.5699	-8.00122	NA	NA	NA	NA	NA	NA	NA	NA	NA	NA	NA	NA	NA	NA	NA	NA	NA	NA	NA	NA	NA	8.05116	NA	NA	NA	NA	NA	NA	NA	NA	NA	NA	NA	NA	NA
TIPIN_P1P2	27.3863	NA	46.935	NA	-5.93741	NA	35.8983	NA	NA	-5.0235	NA	47.8071	-25.5628	-5.63957	NA	NA	6.33203	NA	NA	NA	NA	NA	NA	NA	NA	NA	NA	NA	NA	NA	NA	NA	NA	NA	NA	13.6885	NA	NA	NA	NA	38.9115	NA	NA	NA	NA	NA	NA	NA	NA
IPO7_P1P2	33.0801	NA	30.5802	NA	-1.49614	-3.88248	20.9058	-18.5969	NA	1.75547	NA	22.3958	-2.38653	-4.28512	6.96785	NA	7.61092	NA	28.8765	-31.548	-32.645	NA	NA	-10.3145	-11.0827	-9.46775	28.113	-12.5837	-39.7646	-62.1065	-25.5836	-29.2498	-17.5915	NA	NA	NA	NA	NA	NA	NA	15.6903	NA	NA	NA	NA	NA	-3.61598	-7.37732	NA
LSM10_P1P2	7.65096	NA	10.9371	NA	11.8284	NA	9.4824	-0.815436	NA	NA	NA	9.96389	-19.0812	NA	NA	NA	NA	NA	NA	NA	NA	NA	NA	NA	NA	NA	NA	NA	NA	NA	NA	NA	NA	NA	10.6353	6.8743	NA	NA	NA	NA	17.1301	NA	NA	NA	NA	NA	NA	NA	NA
MPHOSPH6_P1P2	20.5642	NA	39.0712	NA	-3.19573	NA	21.1677	10.0574	NA	NA	NA	46.9589	-11.8744	-8.98435	NA	NA	NA	NA	NA	NA	NA	NA	NA	NA	NA	NA	NA	NA	NA	NA	NA	NA	NA	NA	NA	NA	NA	NA	NA	NA	29.6529	NA	NA	NA	NA	NA	NA	NA	NA
BCAS2_P1P2	36.4278	NA	68.1949	NA	22.561	NA	56.8708	9.83273	NA	NA	NA	75.2381	NA	NA	NA	NA	NA	NA	NA	NA	NA	NA	NA	NA	NA	NA	NA	NA	NA	NA	NA	NA	NA	NA	NA	5.23995	NA	NA	NA	NA	13.662	NA	NA	NA	NA	NA	NA	NA	NA
MMS19_P1P2	12.602	NA	19.2417	NA	NA	NA	23.4433	NA	NA	NA	NA	15.8211	NA	15.2715	NA	NA	NA	NA	NA	NA	NA	NA	NA	NA	NA	NA	NA	NA	NA	NA	NA	NA	NA	NA	NA	NA	NA	NA	NA	NA	NA	NA	NA	NA	NA	NA	NA	NA	NA
ZWINT_P1P2	25.996	-1.77651	38.8543	NA	6.67128	-10.7122	37.3426	NA	NA	NA	NA	53.29	-3.056	NA	11.4187	NA	6.83026	NA	NA	NA	NA	NA	NA	NA	NA	NA	NA	NA	NA	NA	NA	NA	NA	NA	NA	NA	NA	NA	NA	NA	NA	NA	NA	NA	NA	NA	NA	NA	NA
YPEL5_P1P2	4.11284	NA	9.39578	NA	NA	11.2188	NA	NA	NA	NA	NA	10.6123	4.10394	-4.43452	NA	NA	NA	NA	NA	NA	NA	NA	NA	NA	NA	NA	NA	NA	NA	NA	NA	NA	NA	NA	NA	NA	NA	NA	NA	NA	NA	NA	NA	NA	NA	NA	NA	NA	NA
PATL1_P1P2	4.11743	NA	14.2747	NA	NA	-5.0622	32.891	NA	NA	-10.0324	NA	17.1245	-25.7778	-10.2888	NA	NA	NA	NA	NA	NA	NA	NA	NA	NA	NA	NA	NA	NA	NA	NA	NA	NA	NA	NA	NA	NA	NA	NA	NA	NA	NA	NA	NA	NA	NA	NA	NA	NA	NA
HNRNPK_P1P2	24.4504	NA	38.6949	-16.6176	-0.448088	-8.16516	36.0386	NA	NA	-35.4025	NA	58.2885	-42.0701	NA	NA	18.1951	8.2641	NA	NA	NA	NA	NA	NA	NA	NA	NA	NA	NA	NA	NA	NA	NA	NA	NA	NA	NA	NA	NA	NA	NA	9.11707	NA	NA	NA	NA	NA	3.83879	NA	NA
DLAT_P1P2	5.32126	NA	NA	NA	0.42075	NA	2.17209	NA	NA	NA	NA	NA	NA	NA	20.3841	NA	17.6746	NA	NA	NA	NA	NA	NA	NA	NA	NA	NA	NA	NA	NA	NA	NA	NA	NA	NA	NA	NA	NA	NA	NA	NA	NA	4.39164	NA	NA	NA	NA	NA	NA
MRPL36_P1P2	42.5477	NA	58.1355	NA	NA	-28.0506	54.0989	NA	NA	3.75949	NA	69.1868	NA	-10.9879	14.0924	NA	NA	NA	39.4442	-84.7304	-61.1423	-16.9661	-7.22409	-32.2852	-86.2283	-60.3154	34.1577	-47.2842	-64.4931	-71.2446	-78.5156	-39.7853	-49.1645	10.1379	-7.21749	1.73474	-7.23818	NA	NA	NA	2.27115	NA	1.50743	NA	NA	NA	-12.4331	-17.0906	NA
MCAT_P1P2	8.31403	-5.61948	13.5846	3.56925	NA	-10.6935	20.794	NA	NA	NA	NA	14.4068	-2.37727	-0.614921	5.43685	NA	NA	NA	NA	NA	NA	NA	NA	NA	NA	NA	NA	NA	NA	NA	NA	NA	NA	NA	NA	NA	NA	NA	NA	NA	NA	NA	NA	NA	NA	NA	NA	NA	NA
SAP18_P1P2	30.0274	NA	57.2088	NA	-8.46198	NA	35.5715	5.96306	NA	NA	NA	57.4218	NA	-32.1216	NA	NA	NA	NA	NA	NA	NA	NA	NA	NA	NA	NA	NA	NA	NA	NA	NA	NA	NA	NA	NA	NA	NA	NA	NA	NA	3.50711	NA	NA	NA	NA	NA	NA	NA	NA
CHEK1_P1P2	38.1778	NA	73.7708	NA	13.4923	NA	20.7417	15.8317	NA	NA	NA	69.2173	NA	-5.3802	NA	NA	NA	NA	NA	NA	NA	NA	NA	NA	NA	NA	NA	NA	NA	NA	NA	NA	NA	NA	NA	NA	NA	NA	NA	NA	NA	NA	NA	NA	NA	NA	NA	NA	NA
CENPJ_P1P2	32.6076	NA	45.998	NA	NA	NA	43.4938	NA	NA	NA	NA	64.8155	NA	-5.718	NA	NA	NA	NA	NA	NA	NA	NA	NA	NA	NA	NA	NA	NA	NA	NA	NA	NA	NA	NA	NA	NA	NA	NA	NA	NA	NA	NA	NA	NA	NA	NA	NA	NA	NA
COPB1_P1P2	59.782	21.2674	104.273	20.2179	23.2643	60.8674	61.9677	11.891	NA	-6.41545	NA	79.4483	NA	NA	NA	NA	NA	NA	NA	NA	NA	NA	NA	NA	NA	NA	NA	NA	NA	NA	NA	NA	NA	96.2137	NA	27.4415	NA	NA	NA	NA	54.9135	NA	3.55761	NA	NA	NA	NA	NA	NA
POLE2_P1P2	11.5088	NA	32.0144	NA	27.4733	9.7292	7.74409	16.5444	NA	-2.55307	NA	16.4627	NA	NA	NA	NA	NA	NA	NA	NA	NA	NA	NA	NA	NA	NA	NA	NA	NA	NA	NA	NA	NA	66.0966	NA	11.6665	NA	NA	NA	NA	22.5971	NA	-3.56788	NA	NA	NA	NA	NA	NA
TAF8_P1P2	25.0148	NA	43.4705	NA	NA	-7.67294	50.1742	NA	NA	3.91292	NA	86.8387	-28.1107	NA	NA	NA	NA	NA	NA	NA	NA	NA	NA	NA	NA	NA	NA	NA	NA	NA	NA	NA	NA	NA	NA	NA	NA	NA	NA	NA	24.552	NA	NA	NA	NA	NA	NA	NA	NA
TMEM37_P1P2	2.17614	NA	NA	NA	NA	NA	NA	NA	NA	NA	NA	NA	NA	NA	NA	NA	NA	NA	NA	NA	NA	NA	NA	NA	NA	NA	NA	NA	NA	NA	NA	NA	NA	NA	NA	NA	NA	NA	NA	NA	NA	NA	1.65887	NA	NA	NA	NA	NA	NA
MCUR1_P1P2	3.21613	NA	18.4881	NA	NA	-11.1322	23.1607	NA	NA	NA	NA	13.8854	NA	NA	NA	NA	NA	NA	NA	NA	NA	NA	NA	NA	NA	NA	NA	NA	NA	NA	NA	NA	NA	NA	NA	NA	NA	NA	NA	NA	NA	NA	NA	NA	NA	NA	NA	NA	NA
GTF2E1_P1P2	33.552	-4.6642	51.9873	NA	NA	-13.1719	40.4985	NA	NA	NA	NA	51.4587	-20.6888	-13.1401	NA	NA	NA	NA	34.9505	-61.477	-43.7459	-5.34376	-12.1894	-23.1595	-47.5681	-35.9673	34.1461	-27.0007	-43.9336	-58.0756	-28.4212	-38.2589	-41.0373	NA	NA	3.10174	NA	NA	NA	NA	3.61906	NA	NA	NA	NA	NA	NA	NA	NA
GIGYF2_P1P2	3.49705	NA	12.7351	18.7477	-9.13649	-10.0703	33.5659	9.23453	NA	-35.7568	NA	10.9441	-24.8799	7.79513	NA	NA	NA	NA	NA	NA	NA	NA	NA	NA	NA	NA	NA	NA	NA	NA	NA	NA	NA	NA	NA	NA	NA	NA	NA	NA	NA	NA	-4.34626	NA	NA	NA	NA	NA	NA
CSE1L_P1P2	47.35	NA	76.3039	NA	11.017	NA	54.1372	40.1204	NA	-34.153	NA	82.8757	NA	NA	NA	NA	NA	NA	NA	NA	NA	NA	NA	NA	NA	NA	NA	NA	NA	NA	NA	NA	NA	77.4036	NA	12.9593	-7.95119	NA	NA	NA	83.1816	NA	NA	NA	NA	NA	NA	NA	NA
PDE1A_ENST00000435564.1	1.39314	NA	NA	NA	NA	NA	NA	NA	NA	NA	NA	NA	NA	NA	NA	NA	NA	NA	NA	NA	NA	NA	NA	NA	NA	NA	NA	NA	NA	NA	NA	NA	NA	NA	NA	NA	NA	NA	NA	NA	NA	NA	NA	NA	NA	NA	NA	NA	NA
TFDP2_P2	2.46999	NA	NA	NA	NA	NA	NA	NA	NA	NA	NA	NA	NA	NA	NA	NA	NA	NA	NA	NA	NA	NA	NA	NA	NA	NA	NA	NA	NA	NA	NA	NA	NA	NA	NA	NA	NA	NA	NA	NA	NA	NA	NA	NA	NA	NA	NA	NA	NA
GLE1_P1P2	13.7771	NA	45.14	11.0406	NA	NA	24.4771	30.6291	NA	NA	NA	22.6229	NA	NA	NA	NA	NA	NA	17.2932	9.34913	NA	NA	15.5074	1.38935	34.0877	0.268826	26.3595	8.25555	NA	NA	22.2453	28.1286	18.3875	NA	NA	3.09027	NA	NA	NA	NA	10.9056	NA	NA	NA	NA	NA	NA	-21.2683	NA
ISCA2_P1P2	29.9381	-15.1183	42.3957	9.15125	NA	-22.3265	49.0652	NA	NA	NA	NA	59.0778	NA	-26.1802	NA	NA	NA	NA	19.1662	-44.9408	-24.9054	NA	NA	-17.6817	-50.4072	-11.8958	26.333	-30.8946	-31.6877	-51.3245	-52.3386	-31.5511	-21.273	NA	NA	NA	NA	NA	NA	NA	14.0096	NA	NA	NA	NA	NA	-6.63652	-15.1324	NA
IDI1_P1P2	18.202	NA	43.2592	NA	NA	6.77856	22.3492	NA	NA	-4.87597	NA	19.3596	NA	-29.4628	NA	NA	NA	NA	NA	NA	NA	NA	NA	NA	NA	NA	NA	NA	NA	NA	NA	NA	NA	NA	NA	NA	NA	NA	NA	NA	NA	NA	NA	NA	NA	NA	NA	NA	33.9397
EPRS_P1P2	34.3114	NA	40.658	NA	NA	NA	20.8371	NA	NA	NA	NA	51.6166	NA	NA	NA	NA	NA	NA	NA	NA	NA	NA	NA	NA	NA	NA	NA	NA	NA	NA	NA	NA	NA	34.2793	-11.1393	NA	-3.08516	NA	NA	NA	NA	NA	NA	NA	NA	NA	NA	NA	NA
RIOK1_P1P2	47.592	-8.75853	73.6494	NA	-24.9997	-10.8154	55.7011	9.48075	NA	NA	NA	84.1615	NA	-42.7992	NA	NA	NA	NA	NA	NA	NA	NA	NA	NA	NA	NA	NA	NA	NA	NA	NA	NA	NA	NA	NA	NA	NA	NA	NA	NA	27.1151	NA	NA	NA	NA	NA	NA	4.12413	NA
NHP2_P1P2	19.4655	NA	42.4079	NA	-5.98898	NA	17.7502	9.07772	NA	NA	NA	51.5023	NA	NA	NA	NA	NA	NA	NA	NA	NA	NA	NA	NA	NA	NA	NA	NA	NA	NA	NA	NA	NA	NA	NA	14.1509	-11.7532	NA	NA	NA	9.2079	NA	NA	NA	NA	NA	NA	NA	NA
ZNF341_P2	1.98788	NA	NA	NA	NA	NA	NA	NA	NA	NA	NA	NA	NA	NA	NA	NA	NA	NA	NA	NA	NA	NA	NA	NA	NA	NA	NA	NA	NA	NA	NA	NA	NA	NA	NA	NA	NA	NA	NA	NA	NA	NA	NA	NA	NA	NA	NA	NA	NA
MARCH11_P1P2	2.08219	NA	NA	NA	NA	NA	NA	NA	NA	NA	NA	NA	NA	NA	NA	NA	NA	NA	NA	NA	NA	NA	NA	NA	NA	NA	NA	NA	NA	NA	NA	NA	NA	NA	NA	NA	NA	NA	NA	NA	NA	NA	NA	NA	NA	NA	NA	NA	NA
MAK_P1P2	4.57288	NA	NA	NA	NA	NA	NA	NA	NA	NA	NA	NA	NA	NA	NA	NA	NA	NA	NA	NA	NA	NA	NA	NA	NA	NA	NA	NA	NA	NA	NA	NA	NA	NA	NA	NA	NA	NA	NA	NA	NA	NA	NA	NA	NA	NA	NA	NA	NA
FBXO28_P1P2	9.26763	3.27056	19.3849	NA	-0.821374	19.141	17.2207	NA	NA	NA	NA	20.4651	NA	NA	8.6775	NA	NA	NA	21.7126	-48.5045	-35.8007	-32.4208	-23.6908	-24.4852	-63.2067	-16.6573	20.7996	-16.5493	-41.6988	-39.2393	-44.4974	-35.8466	-27.3232	NA	NA	NA	NA	NA	NA	NA	NA	NA	NA	NA	NA	NA	NA	-12.586	NA
HINFP_P1P2	45.8938	NA	72.4865	NA	-3.93499	NA	67.697	13.3684	NA	-8.24601	NA	77.285	NA	-44.7721	NA	NA	NA	NA	NA	NA	NA	NA	NA	NA	NA	NA	NA	NA	NA	NA	NA	NA	NA	NA	NA	8.88932	NA	NA	NA	NA	7.6429	NA	NA	NA	NA	NA	NA	NA	NA
SUGT1_P1P2	10.0927	NA	8.03838	NA	NA	NA	21.1961	24.6596	NA	4.07016	NA	NA	NA	NA	NA	NA	NA	NA	NA	NA	NA	NA	NA	NA	NA	NA	NA	NA	NA	NA	NA	NA	NA	NA	NA	NA	NA	NA	NA	NA	NA	NA	NA	NA	NA	NA	NA	-6.95611	NA
TUBGCP2_P1P2	40.4603	NA	60.3254	NA	NA	NA	43.966	NA	NA	-3.88706	NA	73.8946	NA	-10.7344	NA	NA	NA	NA	NA	NA	NA	NA	NA	NA	NA	NA	NA	NA	NA	NA	NA	NA	NA	NA	NA	NA	NA	NA	NA	NA	NA	NA	NA	NA	NA	NA	NA	NA	NA
RFC2_P1P2	25.259	NA	67.6826	NA	NA	NA	18.1734	10.4529	NA	-4.69872	NA	68.8907	NA	-19.2437	NA	NA	NA	NA	NA	NA	NA	NA	NA	NA	NA	NA	NA	NA	NA	NA	NA	NA	NA	7.45563	-3.96421	NA	NA	NA	NA	NA	10.587	NA	NA	NA	NA	NA	NA	NA	NA
UBA2_P1P2	11.3719	NA	40.4988	NA	-8.38733	NA	31.0045	-4.6464	-3.03854	NA	NA	38.4623	-13.8699	NA	18.5241	NA	29.9972	NA	NA	NA	NA	NA	NA	NA	NA	NA	NA	NA	NA	NA	NA	NA	NA	NA	NA	NA	NA	NA	NA	NA	NA	NA	NA	NA	NA	NA	NA	NA	NA
FAIM3_P1P2	4.36083	NA	NA	NA	NA	NA	NA	NA	NA	NA	NA	NA	NA	NA	NA	NA	NA	NA	NA	NA	NA	NA	NA	NA	NA	NA	NA	NA	NA	NA	NA	NA	NA	NA	NA	NA	NA	NA	NA	NA	NA	NA	NA	NA	NA	NA	NA	NA	NA
WDR24_P1P2	13.1543	NA	25.4473	NA	NA	NA	15.0619	-0.923827	NA	NA	NA	15.5756	NA	-0.311868	NA	NA	NA	NA	NA	NA	NA	NA	NA	NA	NA	NA	NA	NA	NA	NA	NA	NA	NA	NA	NA	NA	NA	NA	NA	NA	NA	NA	NA	NA	NA	NA	NA	NA	NA
ARL2_P1P2	23.0095	NA	33.7883	13.3892	21.0371	NA	34.0021	NA	NA	NA	NA	48.3558	NA	-4.28251	9.30755	NA	3.69776	NA	NA	NA	NA	NA	NA	NA	NA	NA	NA	NA	NA	NA	NA	NA	NA	NA	NA	NA	NA	NA	NA	NA	47.4821	NA	NA	NA	NA	NA	NA	-4.56324	NA
MMD_P1P2	11.0676	NA	27.8179	NA	NA	NA	16.8242	NA	NA	1.97863	NA	22.2714	NA	NA	NA	NA	NA	NA	18.2699	-28.3537	-23.2376	-9.31653	-5.28911	-8.04418	-16.0291	-16.5131	24.943	-33.6382	-37.0427	-59.7181	-36.9394	-28.444	-33.4045	NA	NA	NA	NA	NA	NA	NA	NA	NA	NA	NA	NA	NA	NA	NA	NA
NOC4L_P1P2	35.2136	NA	52.1621	NA	-7.10784	-20.9203	27.3519	10.543	NA	1.80501	NA	56.9515	NA	-11.7053	NA	NA	NA	NA	NA	NA	NA	NA	NA	NA	NA	NA	NA	NA	NA	NA	NA	NA	NA	NA	NA	6.08534	NA	NA	NA	NA	36.0367	NA	NA	NA	NA	NA	NA	NA	NA
HAUS1_P1P2	66.5534	NA	95.1076	9.23254	21.3519	NA	67.8221	31.9715	NA	-10.6579	NA	104.799	NA	-17.9332	NA	NA	8.46905	NA	NA	NA	NA	NA	NA	NA	NA	NA	NA	NA	NA	NA	NA	NA	NA	12.6427	NA	7.46614	NA	NA	NA	NA	101.46	NA	NA	NA	NA	NA	NA	NA	NA
DAD1_P1P2	5.2841	NA	7.68509	NA	NA	NA	8.63251	NA	NA	NA	NA	18.2378	NA	-8.16099	NA	NA	NA	NA	NA	NA	NA	NA	NA	NA	NA	NA	NA	NA	NA	NA	NA	NA	NA	NA	NA	2.59202	NA	NA	NA	NA	NA	NA	12.445	NA	NA	NA	2.38776	NA	NA
MED31_P1P2	28.9764	NA	49.1686	NA	NA	NA	25.41	NA	NA	11.7372	NA	56.0946	NA	-7.10793	NA	NA	NA	NA	30.3955	-49.2874	-48.4308	-22.7678	-24.4787	-28.09	-59.572	-51.8642	30.1338	-34.1901	-59.4094	-54.0985	-38.2404	-38.3686	-47.2011	NA	NA	6.54899	-6.75623	NA	NA	NA	NA	NA	NA	NA	NA	NA	NA	NA	NA
TCF3_P1P2	11.6156	9.26714	15.2098	NA	NA	31.9247	28.3318	-4.60157	NA	22.8683	NA	18.7388	13.7423	NA	3.46884	NA	NA	NA	NA	NA	NA	NA	NA	NA	NA	NA	NA	NA	NA	NA	NA	NA	NA	NA	NA	NA	NA	NA	NA	NA	NA	NA	-1.79391	NA	NA	NA	NA	NA	NA
CTDSPL2_P1P2	6.6505	NA	13.3887	-38.3883	NA	NA	15.3164	46.1299	-4.11543	NA	NA	6.99284	-10.7109	-1.69206	9.80946	NA	NA	NA	NA	NA	NA	NA	NA	NA	NA	NA	NA	NA	NA	NA	NA	NA	NA	NA	NA	NA	NA	NA	NA	NA	8.96195	-4.61645	NA	NA	NA	NA	NA	NA	NA
NAA20_P1P2	18.5226	NA	16.72	NA	NA	NA	12.9108	3.40457	NA	NA	NA	43.0656	NA	NA	NA	NA	NA	NA	NA	NA	NA	NA	NA	NA	NA	NA	NA	NA	NA	NA	NA	NA	NA	NA	NA	NA	NA	NA	NA	NA	NA	NA	NA	NA	NA	NA	NA	NA	40.5201
COPS4_P1P2	49.8221	-19.7457	55.7845	18.9011	NA	-19.7849	37.3731	21.9523	NA	NA	NA	62.8906	NA	-0.708346	4.67466	NA	NA	NA	NA	NA	NA	NA	NA	NA	NA	NA	NA	NA	NA	NA	NA	NA	NA	5.0541	-12.5263	NA	-4.33608	NA	NA	NA	10.0262	-11.5348	NA	NA	NA	NA	NA	NA	NA
FANCD2_P1P2	3.01987	NA	NA	3.34183	NA	NA	NA	NA	NA	NA	NA	NA	NA	NA	NA	NA	NA	NA	NA	NA	NA	NA	NA	NA	NA	NA	NA	NA	NA	NA	NA	NA	NA	11.7069	NA	NA	NA	NA	NA	NA	NA	NA	-1.57216	NA	NA	NA	NA	NA	NA
CPSF3_P1P2	22.5328	-5.86941	35.8308	-15.7151	NA	NA	25.4063	22.9603	NA	NA	NA	23.9136	-24.1714	-10.3997	NA	NA	NA	NA	NA	NA	NA	NA	NA	NA	NA	NA	NA	NA	NA	NA	NA	NA	NA	NA	NA	NA	NA	NA	NA	NA	NA	NA	NA	NA	NA	NA	NA	NA	NA
PSMC2_P1P2	14.507	NA	54.5512	13.9496	35.9616	NA	16.4704	28.7569	NA	-5.89245	NA	26.1897	NA	NA	NA	NA	NA	NA	28.3631	-43.4833	-39.303	-13.7071	-15.4835	-11.553	-13.0409	-45.2361	26.6431	-11.1328	-64.7735	-53.0827	-12.8223	NA	-50.5558	77.403	0.474484	32.8441	NA	NA	NA	NA	86.1755	NA	NA	NA	NA	NA	NA	NA	NA
TUBG1_P1P2	43.5739	NA	115.686	NA	NA	NA	68.0053	NA	NA	-8.71583	NA	91.675	NA	NA	NA	NA	NA	NA	NA	NA	NA	NA	NA	NA	NA	NA	NA	NA	NA	NA	NA	NA	NA	13.0175	NA	8.29667	NA	NA	NA	NA	48.5436	NA	NA	NA	NA	NA	NA	NA	NA
SMC2_P1P2	48.9972	NA	78.0762	NA	NA	NA	56.964	NA	NA	-4.09828	NA	92.4262	NA	-16.6203	NA	NA	NA	NA	NA	NA	NA	NA	NA	NA	NA	NA	NA	NA	NA	NA	NA	NA	NA	61.6428	NA	NA	NA	NA	NA	NA	39.7194	NA	NA	NA	NA	NA	NA	NA	NA
RPL37A_P1P2	46.5395	NA	81.6014	NA	NA	NA	29.0515	37.3807	NA	NA	NA	31.1388	NA	NA	NA	NA	NA	NA	NA	NA	NA	NA	NA	NA	NA	NA	NA	NA	NA	NA	NA	NA	NA	25.2326	NA	9.89	NA	NA	NA	NA	18.0215	NA	NA	NA	NA	NA	NA	NA	NA
NELFE_P1P2	5.80177	2.20162	14.716	NA	NA	NA	18.1773	-19.5144	NA	NA	NA	12.5595	NA	-5.57947	NA	NA	NA	NA	NA	NA	NA	NA	NA	NA	NA	NA	NA	NA	NA	NA	NA	NA	NA	NA	NA	NA	-2.75874	NA	NA	NA	5.96241	NA	NA	NA	NA	NA	NA	9.72819	NA
HAUS8_P1P2	9.55933	NA	24.9144	NA	18.3311	NA	13.5195	NA	NA	NA	NA	20.4974	NA	-6.63981	NA	NA	NA	NA	NA	NA	NA	NA	NA	NA	NA	NA	NA	NA	NA	NA	NA	NA	NA	30.4216	NA	6.68032	NA	NA	NA	NA	58.6339	NA	NA	NA	NA	NA	NA	NA	NA
MRPL27_P1P2	33.2464	-19.7146	46.1929	NA	NA	-32.0861	37.1834	NA	NA	NA	NA	62.16	-4.75601	-12.9035	NA	NA	NA	NA	33.7476	-73.1463	-51.7813	-19.6941	-14.169	-31.9278	-80.8056	-42.37	31.9705	-44.8528	-61.5528	-62.1189	-69.0017	-38.886	-54.8623	NA	-3.18882	NA	NA	NA	NA	NA	10.2293	NA	NA	NA	NA	NA	-8.93452	-18.3201	NA
FAM213A_P1	3.7209	NA	NA	NA	NA	NA	NA	NA	NA	NA	NA	NA	NA	NA	NA	NA	NA	NA	NA	NA	NA	NA	NA	NA	NA	NA	NA	NA	NA	NA	NA	NA	NA	NA	NA	NA	NA	NA	NA	NA	NA	NA	NA	NA	NA	NA	NA	NA	NA
DDX20_P1P2	36.1752	NA	56.3235	NA	NA	NA	40.6499	-4.18123	NA	NA	NA	61.1987	NA	-3.64364	NA	NA	NA	NA	NA	NA	NA	NA	NA	NA	NA	NA	NA	NA	NA	NA	NA	NA	NA	NA	NA	NA	NA	NA	NA	NA	NA	NA	NA	NA	NA	NA	NA	NA	NA
RPL7_P1P2	34.3499	NA	60.2752	NA	-38.7864	NA	45.1126	NA	NA	NA	NA	35.1554	NA	-6.83885	NA	NA	NA	NA	NA	NA	NA	NA	NA	NA	NA	NA	NA	NA	NA	NA	NA	NA	NA	NA	NA	8.5342	NA	NA	NA	NA	17.6957	NA	NA	NA	NA	NA	NA	NA	NA
MRPS22_P1P2	21.0655	-11.2737	18.1074	NA	5.65233	-13.5985	19.7832	NA	NA	2.43036	NA	20.567	-5.45884	-7.57444	3.32022	NA	NA	NA	NA	NA	NA	NA	NA	NA	NA	NA	NA	NA	NA	NA	NA	NA	NA	4.02751	NA	NA	NA	NA	NA	NA	6.77297	NA	NA	NA	NA	NA	-6.40095	-17.7032	NA
RAVER2_P1P2	7.86511	NA	NA	NA	NA	NA	NA	NA	NA	NA	NA	8.34806	NA	NA	NA	NA	NA	NA	NA	NA	NA	NA	NA	NA	NA	NA	NA	NA	NA	NA	NA	NA	NA	NA	NA	NA	NA	NA	NA	NA	NA	NA	NA	NA	NA	NA	NA	NA	NA
RAN_P1P2	6.0749	7.6361	29.8017	NA	12.6071	5.58949	17.5852	20.07	NA	NA	NA	11.93	NA	-1.40117	NA	NA	NA	NA	NA	NA	NA	NA	NA	NA	NA	NA	NA	NA	NA	NA	NA	NA	NA	NA	NA	NA	NA	NA	NA	NA	NA	NA	NA	NA	NA	NA	NA	NA	NA
HEATR6_P1P2	2.30831	-0.927182	8.69157	7.57146	NA	NA	NA	NA	NA	NA	NA	1.18302	NA	-0.914674	1.68386	NA	NA	NA	NA	NA	NA	NA	NA	NA	NA	NA	NA	NA	NA	NA	NA	NA	NA	NA	NA	NA	NA	NA	NA	NA	NA	NA	NA	NA	NA	NA	NA	NA	NA
PSMD2_P1P2	39.2719	NA	79.9651	13.1217	24.795	NA	40.4811	33.609	NA	-5.32535	NA	78.3421	NA	-14.3713	NA	NA	NA	NA	NA	NA	NA	NA	NA	NA	NA	NA	NA	NA	NA	NA	NA	NA	NA	29.1893	NA	7.85356	NA	NA	NA	NA	27.84	NA	NA	NA	NA	NA	6.22023	NA	NA
WDR5_P1P2	70.974	NA	138.193	12.9986	NA	NA	87.5358	14.2706	9.80693	NA	NA	110.036	NA	-31.502	NA	NA	NA	NA	NA	NA	NA	NA	NA	NA	NA	NA	NA	NA	NA	NA	NA	NA	NA	24.7283	-12.9005	NA	NA	NA	NA	NA	100.123	NA	NA	NA	NA	NA	NA	NA	NA
UBE3D_P1P2	7.5063	NA	30.3509	-16.2731	NA	-6.18668	20.8531	NA	NA	NA	NA	16.0741	NA	-6.96349	14.205	NA	NA	NA	NA	NA	NA	NA	NA	NA	NA	NA	NA	NA	NA	NA	NA	NA	NA	NA	NA	NA	NA	NA	NA	NA	NA	NA	NA	NA	NA	NA	NA	-3.78249	NA
MRPL50_P1P2	29.2333	-14.9523	41.041	NA	NA	-32.6768	43.612	NA	NA	8.72126	NA	49.1027	NA	-4.59433	NA	NA	NA	NA	NA	NA	NA	NA	NA	NA	NA	NA	NA	NA	NA	NA	NA	NA	NA	NA	NA	NA	-2.50812	NA	NA	NA	NA	NA	NA	NA	NA	NA	-14.2848	-14.1751	NA
POLL_P1P2	4.82362	NA	NA	NA	NA	NA	NA	NA	NA	NA	NA	NA	NA	NA	NA	NA	NA	NA	NA	NA	NA	NA	NA	NA	NA	NA	NA	NA	NA	NA	NA	NA	NA	NA	NA	NA	NA	NA	NA	NA	NA	NA	NA	NA	NA	NA	NA	NA	NA
RRP36_P1P2	10.8019	-5.42735	19.0799	NA	NA	NA	18.842	16.106	NA	NA	NA	15.2509	NA	-4.36755	NA	NA	NA	NA	NA	NA	NA	NA	NA	NA	NA	NA	NA	NA	NA	NA	NA	NA	NA	NA	NA	4.5619	NA	NA	NA	NA	NA	NA	NA	NA	NA	NA	NA	NA	NA
GTF3C2_P1P2	7.22246	NA	3.81102	NA	NA	-9.84723	6.1325	NA	NA	NA	NA	NA	NA	NA	NA	NA	NA	NA	NA	NA	NA	NA	NA	NA	NA	NA	NA	NA	NA	NA	NA	NA	NA	NA	NA	NA	NA	NA	NA	NA	NA	NA	NA	NA	NA	NA	NA	NA	NA
PPP1R8_P1P2	21.158	9.1664	30.1567	6.25154	6.81398	18.1797	28.8152	13.9295	NA	NA	NA	16.1704	-18.5098	NA	8.35873	NA	NA	NA	17.4639	-53.1638	-30.2504	-11.3655	-20.3174	-21.2673	-58.0562	-51.3637	21.243	-25.6559	-60.387	-90.9593	-43.4664	-37.375	-85.7954	NA	NA	2.83736	NA	NA	NA	NA	28.1773	NA	NA	NA	NA	NA	NA	NA	NA
NCAPH_P1P2	52.2706	NA	82.4188	NA	NA	NA	65.4855	11.3215	NA	-2.93763	NA	94.84	NA	-3.69915	NA	NA	NA	NA	NA	NA	NA	NA	NA	NA	NA	NA	NA	NA	NA	NA	NA	NA	NA	31.9306	-9.59882	18.5378	NA	NA	NA	NA	54.7715	NA	-3.69773	NA	NA	NA	NA	NA	NA
SEC14L1_P2	4.16957	NA	NA	NA	NA	NA	NA	NA	NA	NA	NA	NA	NA	NA	NA	NA	NA	NA	NA	NA	NA	NA	NA	NA	NA	NA	NA	NA	NA	NA	NA	NA	NA	NA	NA	1.89657	NA	NA	NA	NA	NA	NA	NA	NA	NA	NA	-3.4552	NA	NA
ACTR6_P1P2	34.1319	NA	55.0715	-18.8429	13.2878	NA	41.9719	42.5088	NA	NA	NA	66.6272	-8.7694	-6.19632	NA	NA	NA	NA	NA	NA	NA	NA	NA	NA	NA	NA	NA	NA	NA	NA	NA	NA	NA	NA	NA	NA	NA	NA	NA	NA	23.0162	NA	NA	NA	NA	NA	7.18642	7.95323	NA
PSMB6_P1	28.3208	NA	62.3891	30.7695	30.6901	NA	28.6522	38.4607	NA	NA	NA	81.297	NA	-8.09172	NA	NA	NA	NA	NA	NA	NA	NA	NA	NA	NA	NA	NA	NA	NA	NA	NA	NA	NA	78.5789	NA	30.7943	NA	NA	NA	NA	95.3753	NA	NA	NA	NA	NA	NA	NA	NA
PRPF4B_P1P2	6.12412	NA	20.1637	2.06187	5.50855	NA	6.00569	NA	NA	NA	NA	NA	NA	-3.3258	NA	NA	NA	NA	NA	NA	NA	NA	NA	NA	NA	NA	NA	NA	NA	NA	NA	NA	NA	NA	NA	NA	NA	NA	NA	NA	NA	NA	NA	NA	NA	NA	NA	-8.00904	NA
RIOK2_P1P2	69.3818	NA	89.5348	NA	NA	-5.01424	66.964	NA	9.94307	9.01041	NA	96.7388	NA	-11.1032	NA	NA	NA	NA	46.4396	-32.8893	-32.1144	NA	5.26101	-8.00829	-22.206	-31.4	43.8891	NA	NA	-20.947	-9.57629	NA	NA	18.3297	NA	9.56238	NA	NA	NA	NA	44.4567	-5.0299	1.75381	NA	NA	NA	NA	NA	NA
CINP_P1P2	25.3678	NA	48.7017	NA	-3.31988	-4.95081	38.4574	NA	NA	NA	NA	57.669	NA	NA	NA	NA	NA	NA	32.671	-28.5999	-25.8815	-10.3646	-7.53	-6.57981	-15.1789	-16.0943	37.5108	NA	-20.306	-30.8875	-27.1462	-10.1421	-22.3843	NA	NA	NA	NA	NA	NA	NA	NA	NA	NA	NA	NA	NA	3.74406	NA	NA
ZCRB1_P1P2	11.7011	NA	24.25	NA	NA	NA	28.26	NA	NA	NA	NA	18.5291	-4.77238	-5.86046	NA	NA	NA	NA	NA	NA	NA	NA	NA	NA	NA	NA	NA	NA	NA	NA	NA	NA	NA	NA	NA	NA	NA	NA	NA	NA	NA	NA	NA	NA	NA	NA	NA	NA	NA
PFAS_P1P2	23.582	NA	26.1867	NA	NA	NA	21.6428	NA	NA	NA	NA	21.668	NA	-10.3899	NA	NA	NA	NA	18.0776	-35.1646	-36.7207	-2.40235	-6.12811	-10.5153	-10.4603	-16.6771	28.9118	-42.6542	-61.2073	-84.4493	-40.4976	-22.311	-47.6252	52.0755	-19.1788	NA	NA	NA	NA	NA	NA	NA	NA	NA	NA	NA	NA	NA	NA
NAA15_P1P2	7.63372	NA	6.52923	NA	NA	NA	NA	NA	NA	NA	NA	4.1623	NA	NA	NA	NA	NA	NA	NA	NA	NA	NA	NA	NA	NA	NA	NA	NA	NA	NA	NA	NA	NA	NA	NA	NA	NA	NA	NA	NA	NA	NA	NA	NA	NA	NA	NA	5.97482	NA
SENP6_P1P2	3.79714	NA	NA	NA	NA	NA	4.53383	NA	NA	NA	NA	NA	NA	NA	NA	NA	NA	NA	NA	NA	NA	NA	NA	NA	NA	NA	NA	NA	NA	NA	NA	NA	NA	NA	NA	NA	NA	NA	NA	NA	NA	NA	NA	NA	NA	NA	NA	NA	NA
ZMYM5_P1P2	18.4688	NA	NA	NA	NA	NA	NA	NA	NA	NA	NA	NA	NA	NA	NA	NA	NA	NA	NA	NA	NA	NA	NA	NA	NA	NA	NA	NA	NA	NA	NA	NA	NA	NA	NA	NA	NA	NA	NA	NA	NA	NA	NA	NA	NA	NA	NA	NA	NA
MIS18A_P1P2	62.0112	NA	99.4346	NA	NA	NA	67.2437	10.4937	NA	-5.78766	NA	94.2553	NA	-8.02121	NA	NA	NA	NA	NA	NA	NA	NA	NA	NA	NA	NA	NA	NA	NA	NA	NA	NA	NA	14.1795	-4.46405	4.78895	NA	NA	NA	NA	35.6728	-6.16389	NA	NA	NA	NA	NA	NA	NA
CUL2_P1P2	8.10208	-8.16679	15.9947	3.04634	NA	-24.2495	8.5523	52.0161	NA	NA	NA	23.1784	-17.9429	NA	NA	NA	NA	NA	NA	NA	NA	NA	NA	NA	NA	NA	NA	NA	NA	NA	NA	NA	NA	NA	NA	NA	NA	NA	NA	NA	NA	NA	NA	NA	NA	NA	NA	NA	NA
CHD4_P1P2	14.5274	NA	28.8077	30.7281	NA	15.681	23.0919	4.06275	NA	NA	NA	16.2425	NA	-3.4047	5.63769	NA	NA	NA	23.8866	-58.0687	-32.1645	-57.5953	-39.3425	-21.2792	-57.1545	-49.6761	21.807	-27.7111	-32.449	-52.5062	-50.3148	-34.941	-60.6816	NA	NA	NA	NA	NA	NA	NA	3.20539	NA	NA	NA	NA	NA	13.5743	15.9932	NA
ENO1_P1P2	17.3248	NA	21.4197	NA	NA	NA	16.6284	-11.4901	NA	NA	NA	13.4763	NA	-7.05286	NA	NA	NA	NA	NA	NA	NA	NA	NA	NA	NA	NA	NA	NA	NA	NA	NA	NA	NA	NA	NA	NA	NA	NA	NA	NA	NA	NA	NA	NA	NA	NA	NA	NA	NA
DNAJC2_P1P2	6.79836	NA	14.0938	NA	-10.4772	NA	15.5276	NA	NA	NA	NA	6.55491	NA	NA	15.028	NA	3.95633	NA	NA	NA	NA	NA	NA	NA	NA	NA	NA	NA	NA	NA	NA	NA	NA	NA	NA	2.98483	NA	NA	NA	NA	NA	NA	NA	NA	NA	NA	NA	-8.05804	NA
ECD_P1P2	16.2067	NA	14.1971	NA	NA	NA	13.0989	6.98837	NA	NA	NA	21.4671	-13.5316	-2.13326	NA	NA	NA	NA	NA	NA	NA	NA	NA	NA	NA	NA	NA	NA	NA	NA	NA	NA	NA	NA	NA	NA	NA	NA	NA	NA	NA	NA	NA	NA	NA	NA	NA	NA	NA
MRPL49_P1P2	20.6161	-8.18498	17.4729	NA	NA	-10.9366	20.3368	NA	NA	3.28939	NA	40.004	NA	-6.52466	NA	NA	NA	NA	NA	NA	NA	NA	NA	NA	NA	NA	NA	NA	NA	NA	NA	NA	NA	NA	NA	3.14039	NA	NA	NA	NA	7.06504	NA	NA	NA	NA	NA	NA	NA	NA
SART1_P1P2	25.9777	NA	53.2871	NA	NA	NA	16.686	NA	NA	NA	NA	63.546	NA	NA	NA	NA	NA	NA	NA	NA	NA	NA	NA	NA	NA	NA	NA	NA	NA	NA	NA	NA	NA	NA	NA	NA	NA	NA	NA	NA	NA	NA	NA	NA	NA	NA	NA	NA	NA
CTNNBL1_P1P2	38.2709	NA	74.0484	NA	NA	NA	33.0288	NA	NA	NA	NA	82.3814	NA	NA	NA	NA	3.66459	NA	NA	NA	NA	NA	NA	NA	NA	NA	NA	NA	NA	NA	NA	NA	NA	NA	NA	NA	NA	NA	NA	NA	NA	NA	NA	NA	NA	NA	NA	NA	NA
AASDHPPT_P1P2	5.55934	NA	4.06709	NA	NA	NA	16.9711	NA	NA	NA	NA	NA	NA	NA	5.22074	NA	9.46233	NA	NA	NA	NA	NA	NA	NA	NA	NA	NA	NA	NA	NA	NA	NA	NA	NA	NA	NA	NA	NA	NA	NA	NA	NA	NA	NA	NA	NA	NA	NA	NA
PRPF38B_P1P2	9.94672	NA	6.92968	NA	16.3346	NA	17.4369	NA	NA	NA	NA	16.6008	NA	NA	8.78189	NA	NA	NA	NA	NA	NA	NA	NA	NA	NA	NA	NA	NA	NA	NA	NA	NA	NA	NA	NA	NA	NA	NA	NA	NA	NA	NA	NA	NA	NA	NA	NA	NA	NA
AP3B1_P1P2	3.626	NA	NA	NA	NA	-0.675852	NA	NA	NA	NA	NA	NA	NA	NA	NA	NA	NA	NA	NA	NA	NA	NA	NA	NA	NA	NA	NA	NA	NA	NA	NA	NA	NA	NA	NA	NA	NA	NA	NA	NA	NA	NA	NA	NA	NA	NA	-2.02533	NA	NA
EHMT1_P1P2	7.80737	NA	13.8834	NA	-8.09426	11.6079	8.3217	-16.0477	NA	NA	NA	22.8711	NA	-6.66864	NA	NA	NA	NA	NA	NA	NA	NA	NA	NA	NA	NA	NA	NA	NA	NA	NA	NA	NA	NA	NA	NA	NA	NA	NA	NA	NA	NA	NA	NA	NA	NA	NA	NA	NA
POT1_P1P2	29.8262	NA	41.2318	NA	NA	NA	29.683	NA	NA	-2.71536	NA	42.6453	-6.55698	NA	9.84833	NA	NA	NA	NA	NA	NA	NA	NA	NA	NA	NA	NA	NA	NA	NA	NA	NA	NA	NA	NA	NA	NA	NA	NA	NA	17.5226	NA	NA	NA	NA	NA	NA	NA	NA
MPO_P1P2	4.14487	NA	NA	NA	NA	NA	NA	NA	NA	NA	NA	NA	NA	NA	NA	NA	NA	NA	NA	NA	NA	NA	NA	NA	NA	NA	NA	NA	NA	NA	NA	NA	NA	NA	NA	NA	NA	NA	NA	NA	NA	NA	NA	NA	NA	NA	NA	NA	NA
MECR_P1P2	2.13166	-3.78831	NA	NA	NA	NA	6.46939	NA	NA	NA	NA	NA	NA	NA	12.3844	NA	9.17124	NA	NA	NA	NA	NA	NA	NA	NA	NA	NA	NA	NA	NA	NA	NA	NA	NA	NA	NA	NA	NA	NA	NA	NA	NA	NA	NA	NA	NA	-3.79563	NA	NA
UTP6_P1P2	51.7368	NA	68.432	NA	-15.0897	-17.9748	45.168	36.8047	NA	8.54961	NA	72.4531	NA	NA	NA	NA	NA	NA	NA	NA	NA	NA	NA	NA	NA	NA	NA	NA	NA	NA	NA	NA	NA	NA	NA	6.83824	NA	NA	NA	NA	82.8145	NA	NA	NA	NA	NA	NA	NA	NA
FANCA_P1P2	7.38553	NA	2.78078	4.01469	NA	NA	NA	NA	NA	NA	NA	NA	NA	NA	NA	NA	NA	NA	NA	NA	NA	NA	NA	NA	NA	NA	NA	NA	NA	NA	NA	NA	NA	NA	NA	NA	NA	NA	NA	NA	NA	NA	NA	NA	NA	NA	NA	NA	NA
CPSF4_P1P2	13.6931	NA	38.3561	-13.3546	NA	NA	32.3566	NA	NA	NA	NA	26.0983	NA	NA	NA	NA	NA	NA	NA	NA	NA	NA	NA	NA	NA	NA	NA	NA	NA	NA	NA	NA	NA	NA	NA	NA	NA	NA	NA	NA	NA	NA	NA	NA	NA	NA	-4.29553	NA	NA
DSN1_P1P2	62.2846	NA	109.316	NA	12.747	NA	78.5749	8.63456	NA	NA	NA	101.222	NA	NA	NA	NA	NA	NA	54.1004	NA	NA	41.4761	32.5019	3.00862	13.9817	-1.55452	53.1149	NA	12.6749	NA	18.707	NA	19.7787	33.131	NA	12.3664	NA	NA	NA	NA	84.9842	NA	NA	NA	NA	NA	NA	NA	NA
MRPL1_P1P2	10.4507	-3.20801	22.1203	NA	NA	-24.0961	27.5259	NA	NA	NA	NA	12.2865	NA	NA	29.176	-18.9997	4.71959	NA	NA	NA	NA	NA	NA	NA	NA	NA	NA	NA	NA	NA	NA	NA	NA	NA	NA	NA	NA	NA	NA	NA	4.22075	NA	NA	NA	NA	NA	-5.05587	-8.50798	NA
NDUFA10_P1P2	9.64294	NA	7.87572	NA	NA	NA	12.0701	NA	NA	NA	NA	5.44843	NA	-2.72327	NA	NA	NA	NA	NA	NA	NA	NA	NA	NA	NA	NA	NA	NA	NA	NA	NA	NA	NA	NA	NA	NA	NA	NA	NA	NA	NA	NA	NA	NA	NA	NA	NA	NA	NA
SNRNP25_P1P2	43.7893	NA	80.7819	NA	NA	NA	27.9901	12.5869	NA	NA	NA	78.2823	NA	NA	NA	NA	NA	NA	NA	NA	NA	NA	NA	NA	NA	NA	NA	NA	NA	NA	NA	NA	NA	6.31367	NA	7.85308	NA	NA	NA	NA	63.6915	NA	-2.44255	NA	NA	NA	NA	NA	NA
C19orf70_P1P2	33.6273	NA	48.9493	NA	-16.595	NA	37.9616	NA	NA	NA	NA	71.9871	-7.70456	-6.26972	14.3931	NA	11.2273	NA	NA	NA	NA	NA	NA	NA	NA	NA	NA	NA	NA	NA	NA	NA	NA	NA	NA	NA	NA	NA	NA	NA	2.38053	NA	NA	NA	NA	NA	-2.87861	NA	NA
VPS72_P1P2	28.5172	-4.71585	77.6732	-6.28197	21.9152	-16.8139	42.4455	NA	NA	-6.44999	NA	55.682	NA	-6.88122	NA	NA	NA	NA	NA	NA	NA	NA	NA	NA	NA	NA	NA	NA	NA	NA	NA	NA	NA	NA	NA	NA	NA	NA	NA	NA	83.7269	NA	NA	NA	NA	NA	NA	NA	NA
ZNF830_P1P2	22.2639	NA	69.9809	NA	19.9195	NA	36.8921	3.62259	NA	-6.40131	NA	21.3744	4.83474	-1.74398	8.37758	NA	NA	NA	NA	NA	NA	NA	NA	NA	NA	NA	NA	NA	NA	NA	NA	NA	NA	NA	NA	14.2428	NA	NA	NA	NA	NA	NA	NA	NA	NA	NA	NA	NA	NA
FAM50A_P1P2	19.3442	NA	19.0276	3.59363	NA	NA	28.9008	NA	NA	NA	NA	59.4893	-5.96627	NA	NA	NA	NA	NA	NA	NA	NA	NA	NA	NA	NA	NA	NA	NA	NA	NA	NA	NA	NA	NA	NA	NA	NA	NA	NA	NA	NA	NA	NA	NA	NA	NA	NA	NA	NA
VPS4A_P1P2	21.1424	-22.9034	56.117	NA	-6.01648	-34.1834	33.3429	-5.87197	NA	NA	NA	33.9119	NA	-12.6072	13.1056	NA	NA	NA	28.6844	-50.0693	-24.5104	-18.5388	-6.96779	-30.8069	-59.7869	-32.2981	30.6857	-35.7204	-36.1129	-67.3047	-32.907	-32.9985	-59.6653	NA	NA	NA	NA	NA	NA	NA	NA	NA	NA	NA	NA	NA	NA	NA	NA
EFR3A_P1P2	42.1798	NA	82.3177	5.50247	14.9761	-20.1285	55.5649	7.01143	NA	NA	NA	86.5459	NA	-13.3274	5.51341	NA	NA	NA	45.0285	-27.1006	NA	12.0872	15.5455	-14.9365	-35.4179	-21.5462	44.6457	NA	-13.0932	NA	NA	-12.756	-12.9737	NA	NA	NA	NA	NA	NA	NA	NA	NA	NA	NA	NA	NA	NA	NA	NA
SCYL1_P1P2	13.1861	37.2274	29.4427	NA	NA	30.0631	19.2424	NA	NA	NA	NA	28.4565	NA	-15.7259	NA	NA	NA	NA	NA	NA	NA	NA	NA	NA	NA	NA	NA	NA	NA	NA	NA	NA	NA	NA	NA	NA	NA	NA	NA	NA	NA	NA	NA	NA	NA	NA	NA	NA	NA
RFC4_P1P2	38.2344	NA	49.2204	7.98769	12.4686	NA	28.325	26.2005	NA	-14.1974	NA	34.3952	NA	-17.4934	NA	9.24457	NA	NA	NA	NA	NA	NA	NA	NA	NA	NA	NA	NA	NA	NA	NA	NA	NA	39.8163	-10.5772	6.19667	NA	NA	NA	NA	21.125	NA	-15.7381	NA	NA	NA	NA	NA	NA
RPL7A_P1P2	32.1881	NA	54.7786	NA	-3.76464	NA	54.3865	NA	NA	NA	NA	75.3611	NA	NA	NA	NA	NA	NA	37.3834	-27.9231	-16.8435	NA	NA	-3.87435	6.73304	-13.6487	37.0127	-11.0238	-26.6635	-37.7793	7.23673	NA	-24.637	NA	NA	23.7087	NA	NA	NA	NA	78.1431	NA	NA	NA	NA	NA	-1.77335	NA	NA
NDUFB8_P1P2	24.2248	-15.3301	35.2756	NA	NA	-16.6707	31.629	NA	NA	2.76644	NA	34.84	7.02616	-7.87702	6.35793	NA	NA	NA	17.6309	-53.6059	-35.1167	-22.9558	-17.49	-23.7301	-70.0918	-29.8979	17.142	-31.8124	-42.8622	-53.8171	-55.206	-34.6715	-38.8925	NA	NA	NA	NA	NA	NA	NA	NA	NA	NA	NA	NA	NA	NA	NA	-25.5519
SNUPN_P1P2	6.5657	NA	11.5269	NA	6.16384	NA	3.17147	-2.95466	NA	NA	NA	9.05669	-9.75783	NA	10.1178	NA	5.37057	NA	NA	NA	NA	NA	NA	NA	NA	NA	NA	NA	NA	NA	NA	NA	NA	NA	NA	NA	NA	NA	NA	NA	8.70319	NA	NA	NA	NA	NA	NA	-3.52751	NA
FAM204A_P1P2	4.30011	NA	9.72844	NA	NA	NA	3.53824	NA	NA	NA	NA	10.4777	NA	-3.7506	NA	NA	NA	NA	NA	NA	NA	NA	NA	NA	NA	NA	NA	NA	NA	NA	NA	NA	NA	NA	NA	NA	NA	NA	NA	NA	NA	NA	NA	NA	NA	NA	NA	NA	NA
C5orf47_P1P2	1.77095	NA	NA	NA	NA	NA	NA	NA	NA	NA	NA	NA	NA	NA	NA	NA	NA	NA	NA	NA	NA	NA	NA	NA	NA	NA	NA	NA	NA	NA	NA	NA	NA	NA	NA	NA	NA	NA	NA	NA	NA	NA	NA	NA	NA	NA	NA	NA	NA
TCP1_P1P2	32.1786	NA	76.1873	NA	19.4576	NA	47.1953	35.507	NA	NA	NA	60.2591	NA	-11.739	NA	NA	NA	NA	NA	NA	NA	NA	NA	NA	NA	NA	NA	NA	NA	NA	NA	NA	NA	23.5096	NA	7.41146	NA	NA	NA	NA	60.2247	NA	NA	NA	NA	NA	NA	NA	NA
KIF20A_P1P2	13.4327	NA	27.7421	9.5015	57.2078	NA	24.1706	NA	NA	-3.60583	NA	19.316	-13.4401	-5.59016	NA	NA	NA	NA	NA	NA	NA	NA	NA	NA	NA	NA	NA	NA	NA	NA	NA	NA	NA	NA	NA	NA	NA	NA	NA	NA	75.2109	NA	NA	NA	NA	NA	NA	NA	NA
ANAPC13_P1P2	33.907	-6.50032	54.5722	10.3737	9.30065	-16.4209	59.7345	30.4798	NA	-3.84517	NA	69.8902	NA	-30.3517	11.7333	NA	NA	NA	NA	NA	NA	NA	NA	NA	NA	NA	NA	NA	NA	NA	NA	NA	NA	NA	NA	NA	NA	NA	NA	NA	NA	NA	NA	NA	NA	NA	NA	NA	NA
C3orf17_P1P2	67.5617	NA	104.8	5.78435	-47.6016	NA	71.7461	20.8807	NA	7.06814	NA	87.9035	NA	-6.66349	NA	NA	NA	NA	48.1123	-44.7594	-28.2561	9.55343	NA	-6.0077	-25.2042	-36.5243	50.8579	-29.1046	-21.2798	-77.9131	-28.4495	-13.5924	NA	NA	NA	NA	NA	NA	NA	NA	46.2032	NA	3.88577	NA	NA	NA	NA	NA	NA
ACTR10_P1P2	21.1836	NA	43.4987	NA	NA	NA	37.7069	24.5723	NA	NA	NA	64.5237	NA	-12.0478	NA	NA	NA	NA	NA	NA	NA	NA	NA	NA	NA	NA	NA	NA	NA	NA	NA	NA	NA	NA	NA	5.30684	NA	NA	NA	NA	27.1792	NA	NA	NA	NA	NA	NA	NA	NA
HAPLN2_P1P2	2.21558	NA	NA	NA	-1.7834	NA	NA	NA	NA	NA	NA	NA	NA	NA	NA	NA	NA	NA	NA	NA	NA	NA	NA	NA	NA	NA	NA	NA	NA	NA	NA	NA	NA	NA	NA	NA	NA	NA	NA	NA	NA	NA	NA	NA	NA	NA	NA	NA	NA
TAF1L_P1P2	2.51083	NA	NA	NA	NA	2.44714	NA	NA	NA	NA	NA	NA	NA	NA	NA	NA	NA	NA	NA	NA	NA	NA	NA	NA	NA	NA	NA	NA	NA	NA	NA	NA	NA	NA	NA	NA	NA	NA	NA	NA	NA	NA	NA	NA	NA	NA	NA	NA	NA
RPS10-NUDT3_P1P2	28.6459	NA	54.7276	2.09099	-0.904161	NA	13.0379	12.502	NA	NA	NA	52.1991	NA	-10.7147	NA	NA	NA	NA	NA	NA	NA	NA	NA	NA	NA	NA	NA	NA	NA	NA	NA	NA	NA	NA	NA	NA	-2.27632	NA	NA	NA	NA	NA	NA	NA	NA	NA	NA	NA	NA
RPS10_P1P2	28.6459	NA	54.7276	2.09099	-0.904161	NA	13.0379	12.502	NA	NA	NA	52.1991	NA	-10.7147	NA	NA	NA	NA	NA	NA	NA	NA	NA	NA	NA	NA	NA	NA	NA	NA	NA	NA	NA	NA	NA	NA	-2.27632	NA	NA	NA	NA	NA	NA	NA	NA	NA	NA	NA	NA
DARS2_P1P2	9.89166	-10.8575	20.5086	NA	NA	-8.78381	14.1157	NA	NA	NA	NA	13.3215	NA	-2.76157	NA	NA	NA	NA	NA	NA	NA	NA	NA	NA	NA	NA	NA	NA	NA	NA	NA	NA	NA	NA	NA	NA	NA	NA	NA	NA	NA	NA	NA	NA	NA	-7.07715	NA	NA	NA
COQ3_P1P2	2.86816	NA	NA	NA	NA	NA	NA	NA	NA	NA	NA	NA	NA	NA	NA	NA	NA	NA	NA	NA	NA	NA	NA	NA	NA	NA	NA	NA	NA	NA	NA	NA	NA	NA	NA	NA	NA	NA	NA	NA	NA	NA	NA	NA	NA	NA	-2.16886	NA	NA
PRDM10_P1P2	3.50004	NA	2.93501	NA	4.56663	NA	NA	NA	NA	NA	NA	NA	NA	NA	NA	NA	NA	NA	NA	NA	NA	NA	NA	NA	NA	NA	NA	NA	NA	NA	NA	NA	NA	NA	NA	NA	NA	NA	NA	NA	NA	NA	NA	NA	NA	NA	-2.36433	NA	NA
NAT10_P1P2	17.5805	NA	16.4532	NA	-10.3969	NA	18.7859	29.2753	NA	NA	NA	43.2082	NA	-8.64279	NA	NA	NA	NA	NA	NA	NA	NA	NA	NA	NA	NA	NA	NA	NA	NA	NA	NA	NA	NA	NA	8.8339	-4.4449	NA	NA	NA	21.1821	-3.47763	NA	NA	NA	NA	NA	NA	NA
GTF2H3_P1P2	17.123	-4.29081	36.8295	NA	-4.84052	-3.17881	30.2351	NA	NA	NA	NA	38.7345	NA	-3.56036	6.2081	NA	NA	NA	NA	NA	NA	NA	NA	NA	NA	NA	NA	NA	NA	NA	NA	NA	NA	NA	NA	NA	NA	NA	NA	NA	NA	NA	NA	NA	NA	NA	NA	NA	NA
CWF19L2_P1P2	34.0979	NA	60.3756	NA	7.6978	NA	23.8635	NA	NA	NA	NA	60.6641	-5.7678	-5.06655	NA	NA	NA	NA	NA	NA	NA	NA	NA	NA	NA	NA	NA	NA	NA	NA	NA	NA	NA	NA	NA	NA	NA	NA	NA	NA	NA	NA	NA	NA	NA	NA	NA	NA	NA
GTF2H4_P1P2	38.9052	-3.83264	61.3864	NA	-5.61082	NA	44.9922	NA	NA	NA	NA	60.3364	NA	-3.85914	NA	NA	NA	NA	36.2837	-51.3734	-30.718	-13.8998	-11.6069	-24.9044	-59.9673	-41.6228	33.731	-31.0854	-49.5948	-53.8062	-35.586	-38.0753	-45.5416	NA	NA	NA	NA	NA	NA	NA	NA	NA	NA	NA	NA	NA	NA	NA	NA
CSTF2_P1P2	3.23693	-2.83397	13.6264	-16.332	-7.06184	-12.2933	6.15789	4.42572	NA	NA	NA	5.74108	-12.0786	NA	NA	10.8722	NA	NA	NA	NA	NA	NA	NA	NA	NA	NA	NA	NA	NA	NA	NA	NA	NA	NA	NA	NA	NA	NA	NA	NA	3.59864	NA	NA	NA	NA	NA	NA	NA	NA
CD209_P1P2	3.00063	NA	NA	NA	NA	NA	NA	NA	NA	NA	NA	NA	NA	NA	NA	NA	NA	NA	NA	NA	NA	NA	NA	NA	NA	NA	NA	NA	NA	NA	NA	NA	NA	NA	NA	NA	NA	NA	NA	NA	NA	NA	NA	NA	NA	NA	NA	NA	NA
C11orf57_P1P2	4.56821	NA	NA	NA	NA	11.2547	3.26449	NA	NA	NA	NA	NA	NA	NA	NA	NA	NA	NA	NA	NA	NA	NA	NA	NA	NA	NA	NA	NA	NA	NA	NA	NA	NA	NA	NA	NA	NA	NA	NA	NA	NA	NA	NA	NA	NA	NA	NA	NA	NA
FANCM_P1P2	6.75715	NA	6.2684	5.03956	NA	NA	3.47081	3.80259	NA	NA	NA	8.78914	NA	19.4606	3.93457	NA	4.61354	NA	NA	NA	NA	NA	NA	NA	NA	NA	NA	NA	NA	NA	NA	NA	NA	NA	NA	NA	NA	NA	NA	NA	NA	NA	NA	NA	NA	NA	NA	NA	NA
TUBGCP4_P1P2	28.1107	NA	42.3851	NA	NA	NA	31.1203	NA	NA	NA	NA	55.6613	NA	-8.57031	NA	NA	NA	NA	NA	NA	NA	NA	NA	NA	NA	NA	NA	NA	NA	NA	NA	NA	NA	NA	NA	14.595	NA	NA	NA	NA	32.7365	NA	NA	NA	NA	NA	NA	NA	NA
CSTF1_P1P2	53.1868	NA	81.9802	-33.7381	NA	NA	51.2823	22.3212	NA	NA	NA	81.1326	NA	NA	NA	8.69824	NA	NA	NA	NA	NA	NA	NA	NA	NA	NA	NA	NA	NA	NA	NA	NA	NA	NA	NA	NA	NA	NA	NA	NA	8.94086	NA	NA	NA	NA	NA	NA	NA	NA
AFG3L2_P1P2	55.2366	NA	77.2046	18.719	NA	NA	66.2176	30.705	NA	-5.57536	NA	81.8838	NA	-42.4724	NA	8.66663	NA	NA	44.6637	-59.6846	-47.0866	NA	NA	-21.2788	-51.7097	-37.4563	40.3298	-42.517	-67.5871	-84.3674	-64.3637	-8.50908	-60.5667	NA	NA	NA	-3.19458	NA	NA	NA	NA	NA	NA	NA	NA	NA	-6.94803	-11.3861	NA
PRIM2_P1P2	30.7005	NA	88.9942	NA	16.3698	NA	31.3969	33.2455	NA	-22.4964	NA	74.1265	NA	NA	NA	NA	NA	NA	NA	NA	NA	NA	NA	NA	NA	NA	NA	NA	NA	NA	NA	NA	NA	14.1551	NA	28.8879	NA	NA	NA	NA	74.9151	NA	-4.39698	NA	NA	NA	NA	NA	NA
MCL1_P1P2	4.56721	NA	NA	NA	22.7852	NA	3.4743	4.58135	NA	NA	NA	NA	NA	NA	NA	NA	NA	NA	8.31597	5.43099	-11.3242	17.9718	0.290587	NA	-5.65876	-10.3969	8.55629	NA	-19.1356	-12.5746	17.7178	5.28211	3.8309	NA	NA	NA	NA	NA	NA	NA	NA	NA	NA	NA	NA	NA	NA	NA	NA
VPS16_P1P2	7.99517	5.18107	8.32264	NA	NA	35.2834	4.61202	NA	NA	NA	NA	8.76992	-11.842	-2.07719	NA	NA	NA	NA	13.5084	-54.5071	-43.9467	-31.2831	-14.5646	-28.0909	-69.9893	-39.2397	14.7239	-55.3711	-77.7754	-90.258	-51.1993	-37.257	-74.8173	9.60972	-5.02142	NA	NA	NA	NA	NA	32.6575	NA	-17.3334	NA	NA	NA	2.84637	NA	NA
SLMO2_P1P2	43.5671	NA	59.3405	6.64026	15.2449	NA	36.6498	16.848	NA	6.33977	NA	69.7878	NA	NA	12.2596	NA	NA	NA	NA	NA	NA	NA	NA	NA	NA	NA	NA	NA	NA	NA	NA	NA	NA	17.7182	-21.8055	NA	NA	NA	NA	NA	15.2732	NA	NA	NA	NA	NA	NA	NA	NA
IMP3_P1P2	38.177	NA	56.1495	NA	NA	NA	35.8046	NA	NA	NA	NA	57.0897	NA	NA	14.2847	NA	NA	NA	NA	NA	NA	NA	NA	NA	NA	NA	NA	NA	NA	NA	NA	NA	NA	NA	NA	NA	NA	NA	NA	NA	48.1435	NA	NA	NA	NA	NA	NA	NA	NA
BTAF1_P1P2	9.8723	-13.7055	26.1087	2.42903	NA	-23.0497	30.8503	NA	NA	1.67124	NA	15.305	NA	2.73372	NA	NA	NA	NA	NA	NA	NA	NA	NA	NA	NA	NA	NA	NA	NA	NA	NA	NA	NA	NA	NA	NA	NA	NA	NA	NA	-2.01052	NA	5.87818	NA	NA	NA	NA	NA	NA
DNA2_P1P2	33.6889	NA	41.1551	NA	31.0068	4.59997	30.8988	25.5391	NA	-3.6037	NA	57.8464	NA	NA	NA	NA	10.431	NA	33.4906	-23.6189	-27.3164	NA	NA	-7.88486	-22.2465	-21.9016	33.2493	NA	-37.9971	NA	NA	NA	-29.9956	NA	NA	6.21624	NA	NA	NA	NA	2.47395	NA	NA	NA	NA	NA	NA	NA	NA
MCM3_P1P2	40.8884	NA	69.1207	NA	NA	NA	41.977	NA	NA	-9.81464	NA	66.4388	NA	NA	NA	NA	NA	NA	41.7723	-27.2225	-38.5621	2.27347	-5.10544	-13.2316	-33.1368	-22.1835	40.4759	-11.9835	-45.4589	-18.8503	-35.6525	-15.7392	NA	6.2174	NA	7.1878	NA	NA	NA	NA	38.4386	NA	NA	NA	NA	NA	NA	NA	NA
LRPPRC_P1P2	40.5295	-12.0569	51.8676	NA	NA	-28.706	43.6429	NA	NA	NA	NA	32.1757	NA	-5.80167	NA	NA	NA	NA	NA	NA	NA	NA	NA	NA	NA	NA	NA	NA	NA	NA	NA	NA	NA	NA	NA	NA	NA	NA	NA	NA	NA	NA	NA	NA	NA	NA	NA	NA	-23.0886
MARS2_P1P2	20.1058	-4.71765	28.3486	NA	NA	-15.9249	25.4062	NA	NA	NA	NA	45.1995	NA	-6.46667	NA	NA	NA	NA	22.5078	-56.8678	-45.14	-15.5202	-6.63748	-25.7481	-71.6693	-37.5328	28.247	-29.3264	-38.8468	-54.7284	-48.2459	-28.2876	-39.8079	NA	NA	NA	-2.45306	NA	NA	NA	NA	NA	NA	NA	NA	NA	NA	NA	-17.1746
IVNS1ABP_P1P2	4.5551	NA	NA	NA	NA	3.66004	3.55067	-2.21767	NA	NA	NA	NA	NA	NA	NA	NA	NA	NA	NA	NA	NA	NA	NA	NA	NA	NA	NA	NA	NA	NA	NA	NA	NA	NA	NA	NA	NA	NA	NA	NA	NA	NA	NA	NA	NA	NA	NA	NA	NA
CCT8_P1P2	39.0642	NA	52.9496	NA	9.56613	NA	41.0201	NA	NA	NA	NA	54.4931	NA	NA	NA	NA	NA	NA	NA	NA	NA	NA	NA	NA	NA	NA	NA	NA	NA	NA	NA	NA	NA	NA	NA	NA	NA	NA	NA	NA	7.04644	NA	NA	NA	NA	NA	NA	-19.4295	NA
DDX23_P1P2	46.1552	NA	64.9132	NA	46.4729	NA	33.3023	NA	NA	-2.80118	NA	60.2961	NA	NA	NA	NA	NA	NA	NA	NA	NA	NA	NA	NA	NA	NA	NA	NA	NA	NA	NA	NA	NA	54.5216	-32.9773	19.5945	NA	NA	NA	NA	115.044	NA	NA	NA	NA	NA	NA	NA	NA
FLAD1_P1P2	14.5521	NA	16.3543	NA	NA	NA	26.3622	NA	NA	NA	NA	27.0475	-21.9512	NA	NA	NA	NA	NA	NA	NA	NA	NA	NA	NA	NA	NA	NA	NA	NA	NA	NA	NA	NA	NA	NA	NA	NA	NA	NA	NA	NA	NA	NA	NA	NA	NA	NA	NA	12.4748
MUTYH_P1P2	11.6175	NA	19.9622	NA	NA	NA	19.9692	-11.0985	NA	NA	NA	10.11	-16.4854	-14.9802	6.25008	NA	NA	NA	NA	NA	NA	NA	NA	NA	NA	NA	NA	NA	NA	NA	NA	NA	NA	NA	NA	NA	NA	NA	NA	NA	NA	NA	NA	NA	NA	NA	NA	NA	-8.17829
COPS5_P1P2	32.1985	-4.68549	35.3088	12.0279	7.63454	-18.8179	32.0255	43.9769	NA	NA	NA	44.6725	NA	-2.94071	NA	NA	7.59871	NA	NA	NA	NA	NA	NA	NA	NA	NA	NA	NA	NA	NA	NA	NA	NA	NA	NA	NA	NA	NA	NA	NA	5.35397	-3.1083	NA	NA	NA	NA	NA	NA	29.4844
CCDC86_P1P2	32.3214	NA	76.5564	NA	NA	-6.79877	52.5447	NA	NA	NA	NA	80.4598	-3.62509	NA	NA	NA	NA	NA	NA	NA	NA	NA	NA	NA	NA	NA	NA	NA	NA	NA	NA	NA	NA	53.1841	NA	10.4148	NA	NA	NA	NA	71.4263	NA	NA	NA	NA	NA	NA	NA	NA
BARD1_P1P2	12.5608	NA	15.8871	16.3669	25.1124	NA	26.3456	25.3008	NA	NA	NA	15.3986	NA	37.3179	27.566	NA	23.3344	NA	NA	NA	NA	NA	NA	NA	NA	NA	NA	NA	NA	NA	NA	NA	NA	NA	NA	NA	NA	NA	NA	NA	NA	NA	NA	NA	NA	NA	NA	NA	NA
DNAJA3_P1P2	43.9221	NA	62.8342	NA	12.4415	-9.00719	35.4944	7.91663	NA	1.6112	NA	68.8254	NA	NA	NA	NA	NA	NA	28.187	-36.7455	-17.0445	NA	NA	-15.7668	-41.7599	-8.73408	38.5142	-26.5777	-36.6675	-35.5772	-27.357	-28.0613	-24.2445	NA	NA	NA	NA	NA	NA	NA	NA	NA	NA	NA	NA	NA	NA	NA	NA
COQ5_P1P2	3.33231	NA	2.57904	NA	NA	NA	8.12926	NA	NA	NA	NA	7.66622	NA	-4.02156	15.097	NA	8.85018	NA	NA	NA	NA	NA	NA	NA	NA	NA	NA	NA	NA	NA	NA	NA	NA	NA	NA	NA	NA	NA	NA	NA	NA	NA	NA	NA	NA	NA	-4.55327	NA	NA
POLR2M_P1P2	31.1403	NA	44.2344	11.5094	NA	-28.745	72.4163	NA	NA	3.13417	NA	80.6721	-36.0924	-49.287	10.8615	NA	NA	NA	NA	NA	NA	NA	NA	NA	NA	NA	NA	NA	NA	NA	NA	NA	NA	NA	NA	NA	NA	NA	NA	NA	NA	NA	NA	NA	NA	NA	NA	NA	NA
PMPCB_P1	55.9915	NA	53.0515	NA	NA	NA	43.2589	NA	NA	NA	NA	58.7925	NA	-14.6773	NA	NA	NA	NA	NA	NA	NA	NA	NA	NA	NA	NA	NA	NA	NA	NA	NA	NA	NA	NA	NA	NA	-2.04235	NA	NA	NA	14.749	NA	NA	NA	NA	NA	NA	-9.88807	NA
CXXC1_P1P2	37.4262	7.17938	49.6501	-8.89306	NA	21.1786	37.2305	NA	15.5293	1.87694	NA	51.2203	6.71607	-12.8317	NA	NA	NA	NA	NA	NA	NA	NA	NA	NA	NA	NA	NA	NA	NA	NA	NA	NA	NA	NA	NA	NA	NA	NA	NA	NA	7.43801	-11.4624	NA	NA	NA	NA	NA	NA	NA
GCN1L1_P1P2	7.32908	NA	14.3453	-3.4303	-11.6312	NA	5.97283	14.0971	NA	3.80463	NA	9.25033	NA	-15.2955	11.2744	NA	6.57791	NA	14.6682	NA	-35.4851	2.00847	NA	-3.04504	-11.984	-22.8403	15.8559	-31.2543	-48.091	-36.9353	11.3815	NA	NA	NA	NA	NA	NA	NA	NA	NA	11.9302	NA	NA	NA	NA	NA	NA	NA	NA
SYF2_P1P2	10.4614	NA	13.3596	NA	NA	NA	12.1126	NA	NA	-3.50698	NA	14.7066	-9.99914	-5.57527	4.88688	NA	NA	NA	NA	NA	NA	NA	NA	NA	NA	NA	NA	NA	NA	NA	NA	NA	NA	NA	NA	NA	NA	NA	NA	NA	NA	NA	NA	NA	NA	NA	NA	NA	NA
TIMMDC1_P1P2	15.8034	-2.6023	12.7673	NA	NA	-14.8879	17.8239	NA	NA	NA	NA	18.4626	NA	-9.87685	6.82314	-12.5239	NA	NA	12.2335	-32.5554	-30.8039	-11.5223	NA	-17.3666	-41.4079	-12.6417	12.7822	-26.2452	-37.0611	-47.836	-42.6884	-24.8966	-13.1191	NA	NA	NA	NA	NA	NA	NA	NA	NA	NA	NA	NA	NA	-6.25024	-11.9944	NA
CCDC174_P1P2	45.086	NA	48.5746	NA	NA	-4.55321	43.5385	23.9959	NA	NA	NA	52.9971	-3.24739	NA	NA	NA	NA	NA	35.6523	-32.4841	-15.0796	NA	NA	-12.7067	-30.6329	-27.4798	38.0749	NA	-40.474	-60.4954	-6.53247	NA	-41.3821	55.6125	NA	7.68857	NA	NA	NA	NA	86.2159	NA	NA	NA	NA	NA	NA	NA	NA
SCFD1_P1P2	47.4615	NA	86.2516	NA	33.7708	NA	38.9522	NA	NA	NA	NA	62.1873	NA	NA	NA	NA	NA	NA	NA	NA	NA	NA	NA	NA	NA	NA	NA	NA	NA	NA	NA	NA	NA	NA	NA	25.736	-13.6486	NA	NA	NA	NA	NA	7.85495	NA	NA	NA	NA	NA	NA
VPS13D_P1P2	41.127	NA	62.945	-1.07691	9.79814	NA	66.6016	NA	NA	3.33048	NA	60.9896	-20.3812	NA	NA	NA	NA	NA	NA	NA	NA	NA	NA	NA	NA	NA	NA	NA	NA	NA	NA	NA	NA	25.6704	-23.2341	NA	NA	NA	NA	NA	24.5864	NA	NA	NA	NA	NA	NA	-37.5403	NA
EFTUD2_P1P2	41.1779	NA	69.442	NA	NA	NA	58.0409	NA	NA	NA	NA	92.6004	NA	NA	NA	NA	NA	19.1998	NA	NA	NA	NA	NA	NA	NA	NA	NA	NA	NA	NA	NA	NA	NA	15.166	NA	10.3823	NA	NA	NA	NA	46.1076	NA	NA	NA	NA	NA	NA	NA	NA
WBSCR22_P1P2	5.49053	NA	13.8758	NA	-7.40112	NA	6.50929	NA	NA	NA	NA	13.8401	-2.99039	-5.63672	NA	NA	NA	NA	NA	NA	NA	NA	NA	NA	NA	NA	NA	NA	NA	NA	NA	NA	NA	NA	NA	NA	NA	NA	NA	NA	NA	NA	NA	NA	NA	NA	NA	NA	3.76956
YJEFN3_P1	7.50362	NA	12.3138	NA	NA	NA	7.19007	NA	NA	NA	NA	10.604	NA	-1.82135	NA	NA	6.21802	NA	NA	NA	NA	NA	NA	NA	NA	NA	NA	NA	NA	NA	NA	NA	NA	NA	NA	NA	NA	NA	NA	NA	NA	NA	1.51995	NA	NA	NA	NA	NA	NA
NUP205_P1P2	37.2314	NA	76.8024	NA	53.0405	NA	51.8163	24.6843	NA	-5.79786	NA	82.0276	NA	NA	NA	NA	NA	NA	NA	NA	NA	NA	NA	NA	NA	NA	NA	NA	NA	NA	NA	NA	NA	NA	NA	20.5677	-8.50237	NA	NA	NA	90.0795	NA	NA	NA	NA	NA	NA	NA	NA
USMG5_P1P2	7.0264	-5.84174	23.2228	NA	-5.46271	-3.02647	19.3792	8.90302	NA	NA	NA	15.1169	NA	-5.44944	5.86722	NA	NA	22.2745	NA	NA	NA	NA	NA	NA	NA	NA	NA	NA	NA	NA	NA	NA	NA	NA	NA	NA	NA	NA	NA	NA	NA	NA	NA	NA	NA	NA	NA	NA	NA
VWA9_P1P2	20.5138	NA	21.6676	26.6726	NA	6.32558	24.2505	NA	NA	NA	NA	14.4179	NA	-3.40722	13.7033	NA	NA	NA	NA	NA	NA	NA	NA	NA	NA	NA	NA	NA	NA	NA	NA	NA	NA	7.67335	NA	NA	NA	NA	NA	NA	NA	NA	NA	NA	NA	NA	NA	NA	NA
RCC1_P2	55.011	NA	97.0741	NA	30.7585	5.46935	61.7932	NA	NA	-3.26157	NA	82.0885	NA	NA	NA	NA	NA	NA	NA	NA	NA	NA	NA	NA	NA	NA	NA	NA	NA	NA	NA	NA	NA	NA	NA	6.31904	NA	NA	NA	NA	50.5907	NA	NA	NA	NA	NA	NA	NA	25.2598
THG1L_P1P2	42.2757	NA	63.9526	NA	-6.04937	NA	50.4796	NA	NA	NA	NA	37.8849	NA	NA	NA	NA	NA	NA	NA	NA	NA	NA	NA	NA	NA	NA	NA	NA	NA	NA	NA	NA	NA	NA	NA	NA	NA	NA	NA	NA	6.69412	NA	NA	NA	NA	NA	-4.04596	-6.78046	NA
NUDCD3_P1P2	32.7799	NA	63.7551	NA	25.5802	NA	52.1011	14.325	NA	-4.48186	NA	78.5599	-27.7124	-9.66641	NA	NA	NA	NA	NA	NA	NA	NA	NA	NA	NA	NA	NA	NA	NA	NA	NA	NA	NA	15.8654	NA	4.60572	NA	NA	NA	NA	58.4117	NA	2.07868	NA	NA	NA	NA	NA	NA
NUP54_P1P2	33.1745	NA	70.0368	NA	NA	21.2928	40.0046	NA	-8.15308	-8.11479	NA	67.4503	NA	-9.79586	NA	NA	NA	NA	36.3495	-42.551	-24.1007	-8.22643	NA	-17.5915	-37.5469	-28.7333	40.3641	NA	-57.9131	-73.8102	-37.3269	NA	-39.5504	19.2987	NA	NA	NA	NA	NA	NA	86.722	-7.95956	-5.2094	NA	NA	NA	NA	NA	NA
ECT2_P1P2	47.2168	-35.5522	74.5186	NA	40.3248	-16.332	36.2957	NA	NA	-9.62215	NA	70.2549	NA	NA	NA	NA	NA	NA	NA	NA	NA	NA	NA	NA	NA	NA	NA	NA	NA	NA	NA	NA	NA	NA	NA	NA	NA	NA	NA	NA	NA	NA	NA	NA	NA	NA	NA	NA	NA
DHX37_P1P2	32.3994	NA	36.615	NA	-14.6932	-5.49561	24.8547	18.4318	NA	NA	NA	23.151	NA	NA	NA	NA	NA	NA	NA	NA	NA	NA	NA	NA	NA	NA	NA	NA	NA	NA	NA	NA	NA	NA	NA	12.4575	-6.62515	NA	NA	NA	43.8384	NA	NA	NA	NA	NA	NA	NA	NA
BYSL_P1P2	17.8137	NA	18.7397	NA	-11.5944	NA	10.5101	19.5983	NA	2.15089	NA	20.5172	-3.18788	-1.12909	NA	NA	NA	NA	NA	NA	NA	NA	NA	NA	NA	NA	NA	NA	NA	NA	NA	NA	NA	NA	NA	NA	-3.11681	NA	NA	NA	59.3461	NA	NA	NA	NA	NA	NA	NA	NA
RPS3_P1	20.5715	NA	55.3434	9.52078	NA	NA	25.332	9.28071	NA	NA	NA	59.4371	NA	NA	NA	NA	NA	NA	NA	NA	NA	NA	NA	NA	NA	NA	NA	NA	NA	NA	NA	NA	NA	NA	NA	NA	NA	NA	NA	NA	NA	NA	NA	NA	NA	NA	NA	NA	NA
TTC37_P1P2	3.80173	-3.92392	10.3216	NA	-11.1607	-2.48063	20.8028	NA	NA	-6.22996	NA	7.30287	-2.00805	-4.07226	3.31194	NA	NA	NA	NA	NA	NA	NA	NA	NA	NA	NA	NA	NA	NA	NA	NA	NA	NA	NA	NA	NA	NA	NA	NA	NA	NA	NA	NA	NA	NA	NA	NA	NA	NA
CLK3_P1	5.52629	NA	NA	NA	NA	NA	NA	NA	NA	NA	NA	NA	NA	NA	NA	NA	NA	NA	NA	NA	NA	NA	NA	NA	NA	NA	NA	NA	NA	NA	NA	NA	NA	NA	NA	NA	NA	NA	NA	NA	NA	NA	NA	NA	NA	NA	3.29845	6.60409	NA
ANAPC5_P1P2	40.0052	NA	59.0848	NA	32.5042	NA	43.8456	NA	NA	-2.08031	NA	73.63	NA	NA	NA	NA	NA	NA	NA	NA	NA	NA	NA	NA	NA	NA	NA	NA	NA	NA	NA	NA	NA	NA	NA	7.76222	NA	NA	NA	NA	48.9375	NA	NA	NA	NA	NA	NA	NA	NA
SLU7_P1P2	27.4236	NA	63.972	NA	NA	NA	28.0757	20.688	NA	-12.7985	NA	61.3936	NA	NA	NA	NA	NA	NA	NA	NA	NA	NA	NA	NA	NA	NA	NA	NA	NA	NA	NA	NA	NA	16.3502	-10.7544	NA	NA	NA	NA	NA	41.4945	NA	NA	NA	NA	NA	NA	NA	NA
MARS_P1P2	27.3673	NA	16.0678	NA	NA	-5.95195	17.4496	NA	NA	NA	NA	45.1755	NA	NA	2.08672	NA	NA	NA	NA	NA	NA	NA	NA	NA	NA	NA	NA	NA	NA	NA	NA	NA	NA	NA	NA	5.58825	-4.82542	NA	NA	NA	18.3278	-2.47939	NA	NA	NA	NA	NA	NA	NA
C10orf2_P1P2	22.1341	-10.9374	36.3288	NA	NA	-30.9316	17.1006	NA	NA	1.53201	NA	63.2858	NA	-10.5008	NA	NA	NA	NA	NA	NA	NA	NA	NA	NA	NA	NA	NA	NA	NA	NA	NA	NA	NA	NA	NA	NA	-3.21693	NA	NA	NA	NA	NA	NA	NA	NA	NA	-5.16354	-10.601	NA
RPS8_P1P2	25.0785	NA	51.2323	NA	NA	NA	15.5675	20.3523	NA	NA	NA	45.8332	NA	NA	NA	NA	NA	NA	NA	NA	NA	NA	NA	NA	NA	NA	NA	NA	NA	NA	NA	NA	NA	38.4586	NA	18.3304	-10.9845	NA	NA	NA	71.0889	NA	NA	NA	NA	NA	NA	NA	NA
C14orf178_P1P2	22.6458	NA	66.3303	NA	NA	NA	38.2037	NA	NA	NA	NA	67.508	NA	NA	NA	NA	NA	NA	NA	NA	NA	NA	NA	NA	NA	NA	NA	NA	NA	NA	NA	NA	NA	NA	NA	3.89105	NA	NA	NA	NA	NA	NA	NA	NA	NA	NA	NA	NA	NA
RPL13A_P1	7.19516	NA	27.8408	NA	NA	NA	4.06144	NA	NA	NA	NA	9.04879	NA	NA	NA	NA	NA	NA	NA	NA	NA	NA	NA	NA	NA	NA	NA	NA	NA	NA	NA	NA	NA	NA	NA	9.40062	NA	NA	NA	NA	NA	NA	NA	NA	NA	NA	NA	NA	NA
TPK1_P1P2	11.1043	NA	18.1922	7.71053	-5.92233	NA	20.9399	NA	NA	-3.86871	NA	6.5937	NA	NA	77.5609	NA	46.07	NA	NA	NA	NA	NA	NA	NA	NA	NA	NA	NA	NA	NA	NA	NA	NA	40.9492	NA	NA	NA	NA	NA	NA	3.59677	NA	NA	NA	NA	NA	NA	NA	NA
PHAX_P1	45.0944	NA	79.1752	6.49412	35.2648	NA	38.1195	24.252	NA	NA	NA	72.5369	NA	NA	NA	NA	NA	NA	NA	NA	NA	NA	NA	NA	NA	NA	NA	NA	NA	NA	NA	NA	NA	NA	NA	NA	NA	NA	NA	NA	NA	NA	NA	NA	NA	NA	NA	NA	NA
EXOSC4_P1P2	28.3658	NA	83.971	NA	-19.893	NA	51.418	11.0026	NA	-7.34813	NA	63.828	NA	NA	6.14336	NA	NA	NA	34.7113	-46.2159	-39.2373	NA	-8.03076	-22.2363	-53.947	-42.3195	45.2641	-19.2481	-59.8742	-61.1773	-47.1399	-29.8882	-47.789	NA	NA	NA	NA	NA	NA	NA	8.88474	NA	NA	NA	NA	NA	NA	NA	NA
CPSF2_P1P2	61.9984	NA	105.467	NA	NA	-5.62253	72.9236	29.4459	NA	-6.83014	NA	81.5442	NA	-12.6458	NA	NA	NA	NA	NA	NA	NA	NA	NA	NA	NA	NA	NA	NA	NA	NA	NA	NA	NA	NA	NA	NA	NA	NA	NA	NA	NA	NA	NA	NA	NA	NA	NA	NA	NA
ANAPC1_P1P2	33.3145	NA	46.4996	NA	17.5363	NA	26.1495	32.3666	NA	NA	NA	50.1011	NA	NA	NA	NA	NA	NA	NA	NA	NA	NA	NA	NA	NA	NA	NA	NA	NA	NA	NA	NA	NA	NA	NA	8.36432	NA	NA	NA	NA	NA	NA	NA	NA	NA	NA	NA	NA	NA
NSMCE4A_P1P2	33.2468	NA	39.9209	9.80481	NA	NA	47.5161	6.87358	NA	NA	NA	64.736	NA	-9.63732	7.82221	NA	NA	NA	NA	NA	NA	NA	NA	NA	NA	NA	NA	NA	NA	NA	NA	NA	NA	NA	NA	6.18039	NA	NA	NA	NA	NA	NA	NA	NA	NA	NA	NA	NA	NA
RPS3A_P1P2	20.1338	NA	50.1948	NA	-2.75174	NA	31.3322	29.6532	NA	NA	NA	24.7136	NA	-4.70251	NA	NA	NA	NA	NA	NA	NA	NA	NA	NA	NA	NA	NA	NA	NA	NA	NA	NA	NA	NA	NA	13.7322	NA	NA	NA	NA	6.6607	NA	NA	NA	NA	NA	NA	NA	NA
SKIV2L2_P1P2	15.8224	NA	36.2978	NA	NA	NA	9.54107	13.0177	NA	NA	NA	14.7738	NA	-7.26767	NA	NA	NA	NA	NA	NA	NA	NA	NA	NA	NA	NA	NA	NA	NA	NA	NA	NA	NA	NA	NA	NA	NA	NA	NA	NA	NA	NA	NA	NA	NA	NA	NA	NA	NA
TACC3_P1	14.5468	NA	44.5892	2.06318	11.1404	NA	17.4711	NA	NA	NA	NA	83.6171	NA	-53.2537	NA	NA	NA	NA	11.2086	NA	7.06485	65.6803	26.846	26.4217	20.9035	-7.0288	31.6804	NA	13.9383	-34.4127	93.6571	NA	20.2344	NA	NA	NA	NA	NA	NA	NA	24.2842	NA	NA	NA	NA	NA	NA	NA	NA
FBL_P1P2	49.3026	NA	85.8882	NA	NA	NA	40.199	29.2528	11.3419	4.45526	NA	83.4255	NA	NA	NA	NA	NA	NA	NA	NA	NA	NA	NA	NA	NA	NA	NA	NA	NA	NA	NA	NA	NA	NA	NA	17.0162	-9.31303	NA	NA	NA	76.974	NA	NA	NA	NA	NA	NA	NA	NA
IGBP1_P1P2	29.0073	NA	42.2648	NA	NA	NA	30.3518	NA	NA	NA	NA	47.3912	NA	-0.317349	NA	NA	NA	NA	NA	NA	NA	NA	NA	NA	NA	NA	NA	NA	NA	NA	NA	NA	NA	NA	NA	NA	NA	NA	NA	NA	NA	NA	NA	NA	NA	NA	NA	NA	NA
THRAP3_P1P2	9.99714	NA	21.492	NA	-19.1274	-10.5627	7.99197	-6.87109	NA	NA	NA	9.98386	NA	-8.06144	11.0934	NA	NA	NA	NA	NA	NA	NA	NA	NA	NA	NA	NA	NA	NA	NA	NA	NA	NA	NA	NA	NA	NA	NA	NA	NA	NA	NA	-3.86725	NA	NA	NA	NA	NA	NA
PLRG1_P1P2	49.4808	NA	95.5171	NA	NA	NA	43.2233	16.0481	NA	-7.3382	NA	78.586	NA	NA	NA	NA	NA	NA	NA	NA	NA	NA	NA	NA	NA	NA	NA	NA	NA	NA	NA	NA	NA	37.0763	NA	23.3776	NA	NA	NA	NA	72.3542	NA	NA	NA	NA	NA	NA	NA	NA
PNPT1_P1P2	63.4025	NA	110.664	8.19043	-1.33988	-41.3927	78.3109	8.08625	4.67474	25.5583	NA	102.152	NA	-21.8121	NA	NA	5.91496	NA	49.0287	-65.1208	-46.5762	NA	NA	-30.2794	-74.0048	-48.4722	49.0102	-12.0054	-73.4222	-74.5821	-52.7348	-46.0358	-16.5869	32.6671	-13.3397	NA	NA	NA	NA	NA	51.2501	NA	NA	NA	NA	NA	-7.18373	-7.70544	NA
MAEA_P1	6.11868	NA	5.97427	NA	NA	NA	NA	NA	NA	NA	NA	4.15475	NA	NA	NA	NA	NA	NA	NA	NA	NA	NA	NA	NA	NA	NA	NA	NA	NA	NA	NA	NA	NA	NA	NA	NA	NA	NA	NA	NA	NA	NA	NA	NA	NA	NA	NA	NA	NA
DTYMK_P1P2	6.29781	NA	18.1852	NA	NA	14.709	8.07322	NA	NA	-4.90226	NA	12.8413	NA	-33.7215	NA	NA	NA	NA	NA	NA	NA	NA	NA	NA	NA	NA	NA	NA	NA	NA	NA	NA	NA	NA	NA	NA	-2.18931	NA	NA	NA	NA	NA	-3.57088	NA	NA	-4.63693	NA	-10.899	NA
TMEM167A_P1P2	20.8007	38.2547	36.3229	NA	NA	41.9642	28.6896	NA	NA	NA	NA	24.0156	NA	-8.82537	NA	NA	NA	NA	22.8639	-25.299	-13.381	-2.04044	NA	-14.4547	-29.3325	-16.8517	20.4042	NA	-8.08981	-30.3697	-21.479	NA	-22.426	NA	NA	NA	NA	NA	NA	NA	NA	2.20081	NA	NA	NA	NA	NA	NA	NA
HEATR2_P1P2	2.21995	NA	NA	NA	NA	NA	1.69904	NA	NA	NA	NA	NA	NA	NA	NA	NA	NA	NA	NA	NA	NA	NA	NA	NA	NA	NA	NA	NA	NA	NA	NA	NA	NA	NA	NA	NA	NA	NA	NA	NA	NA	NA	NA	NA	NA	NA	NA	NA	NA
CHKA_P1P2	2.2948	NA	4.03744	17.8098	NA	NA	NA	NA	NA	NA	NA	5.86456	NA	NA	NA	NA	NA	NA	NA	NA	NA	NA	NA	NA	NA	NA	NA	NA	NA	NA	NA	NA	NA	NA	NA	NA	NA	NA	NA	NA	NA	NA	NA	NA	NA	NA	NA	NA	NA
SF3B3_P1P2	26.4648	NA	37.9309	NA	47.5349	2.36267	22.4152	32.8131	NA	NA	NA	32.2255	NA	-2.34895	NA	NA	NA	NA	NA	NA	NA	NA	NA	NA	NA	NA	NA	NA	NA	NA	NA	NA	NA	NA	NA	9.54906	NA	NA	NA	NA	27.2141	NA	NA	NA	NA	NA	NA	NA	NA
MRPL3_P1P2	31.2233	-6.66589	46.7893	NA	NA	-20.1612	65.7948	NA	NA	NA	NA	73.1782	NA	-12.1276	NA	NA	NA	NA	34.1953	-75.6263	-55.3778	-15.0658	-11.4156	-30.4874	-79.1901	-55.0454	35.7131	-36.859	-58.7692	-57.671	-72.0088	-43.1067	-61.4897	8.22061	-3.36662	NA	-6.28967	NA	NA	NA	NA	NA	NA	NA	NA	NA	-8.64047	-22.7683	NA
PAPOLA_P1P2	14.9691	NA	6.25931	-16.7397	0.862187	NA	NA	-3.5186	NA	NA	NA	13.4367	NA	NA	4.67277	NA	NA	NA	NA	NA	NA	NA	NA	NA	NA	NA	NA	NA	NA	NA	NA	NA	NA	NA	NA	NA	NA	NA	NA	NA	NA	NA	NA	NA	NA	NA	NA	NA	NA
CENPP_P1P2	37.0265	-6.58744	64.1777	NA	-15.0844	-7.61449	48.1074	NA	NA	NA	NA	71.5668	-5.6481	-3.6715	9.45762	NA	NA	NA	NA	NA	NA	NA	NA	NA	NA	NA	NA	NA	NA	NA	NA	NA	NA	NA	NA	NA	NA	NA	NA	NA	NA	NA	NA	NA	NA	NA	9.77508	NA	NA
PDCD7_P1P2	10.4129	NA	11.3326	NA	18.9175	NA	15.4574	8.58644	NA	NA	NA	11.9972	NA	-5.43623	NA	NA	NA	NA	NA	NA	NA	NA	NA	NA	NA	NA	NA	NA	NA	NA	NA	NA	NA	NA	NA	NA	NA	NA	NA	NA	NA	NA	NA	NA	NA	NA	NA	NA	NA
MED12_P1P2	54.4627	NA	105.445	19.1712	NA	15.3341	64.5078	NA	NA	12.1664	NA	99.1351	NA	-53.2363	NA	NA	3.66544	NA	46.2367	-63.0688	-59.0458	-39.1517	-33.1454	-24.6994	-58.7026	-57.6592	46.5337	-20.4175	-101.16	-89.9542	-56.1075	-40.5945	-82.5327	8.32825	-26.5735	6.55045	NA	NA	NA	NA	-11.5459	15.0802	NA	NA	NA	NA	NA	NA	NA
HSCB_P1P2	15.8003	NA	8.80105	NA	NA	NA	23.3494	NA	NA	NA	NA	36.4449	-1.79622	NA	NA	NA	NA	NA	NA	NA	NA	NA	NA	NA	NA	NA	NA	NA	NA	NA	NA	NA	NA	NA	NA	NA	NA	NA	NA	NA	NA	NA	NA	NA	NA	NA	NA	NA	NA
NVL_P1P2	52.376	NA	83.9913	8.38959	-23.4882	-16.0068	54.3057	10.4018	NA	5.87439	NA	94.3174	-14.4677	NA	NA	NA	NA	NA	NA	NA	NA	NA	NA	NA	NA	NA	NA	NA	NA	NA	NA	NA	NA	32.0136	NA	7.71853	NA	NA	NA	NA	92.0945	NA	NA	NA	NA	NA	NA	-7.74454	NA
RAD51C_P1P2	34.7977	NA	38.5298	NA	-2.91752	NA	38.7048	2.25774	NA	-9.67436	NA	53.8975	NA	-0.659321	NA	NA	5.9888	NA	NA	NA	NA	NA	NA	NA	NA	NA	NA	NA	NA	NA	NA	NA	NA	NA	NA	10.253	NA	NA	NA	NA	4.68535	NA	NA	NA	NA	NA	-2.10194	NA	NA
CDC20_P1P2	50.0492	NA	70.4244	NA	52.1158	NA	40.1542	14.773	NA	-15.7263	NA	35.9348	NA	NA	NA	NA	NA	NA	NA	NA	NA	NA	NA	NA	NA	NA	NA	NA	NA	NA	NA	NA	NA	NA	NA	15.1469	NA	NA	NA	NA	52.5736	NA	NA	NA	NA	NA	NA	NA	NA
PRRC2A_P1P2	5.4892	NA	19.0954	NA	NA	5.10058	9.71895	5.49363	NA	NA	NA	9.10365	6.40801	-3.82717	5.38861	NA	5.03521	NA	NA	NA	NA	NA	NA	NA	NA	NA	NA	NA	NA	NA	NA	NA	NA	6.43377	NA	NA	NA	NA	NA	NA	15.5745	NA	NA	NA	NA	NA	NA	NA	3.39143
MRPS31_P1P2	28.5591	-20.1902	25.1713	NA	NA	-13.0004	36.4564	NA	NA	NA	NA	50.7304	NA	-7.7684	NA	NA	NA	NA	NA	NA	NA	NA	NA	NA	NA	NA	NA	NA	NA	NA	NA	NA	NA	6.94908	NA	NA	-4.55177	NA	NA	NA	NA	NA	NA	NA	NA	NA	NA	NA	-16.1014
INTS8_P1P2	39.5201	NA	66.6022	21.9276	26.5231	NA	46.779	6.1748	NA	-12.3371	NA	70.1798	NA	NA	NA	NA	NA	NA	NA	NA	NA	NA	NA	NA	NA	NA	NA	NA	NA	NA	NA	NA	NA	7.97304	NA	6.85099	6.92283	NA	NA	NA	63.1248	-13.259	NA	NA	NA	NA	NA	NA	NA
UMPS_P1P2	42.6459	NA	87.9891	NA	-31.9429	-16.6341	49.206	NA	NA	-10.7898	NA	90.6984	NA	-23.3932	NA	NA	NA	NA	42.4535	-65.4105	-60.3203	NA	-19.1003	-30.7149	-96.9508	-74.1632	36.5901	-36.3826	-105.581	-130.024	-71.8972	-76.6691	-62.287	43.9555	-22.3959	NA	NA	NA	NA	NA	44.8154	NA	NA	NA	NA	NA	NA	NA	NA
LSM5_P1	54.3538	NA	86.9524	NA	28.1478	NA	43.8793	23.7382	NA	-14.73	NA	72.1755	NA	-1.64601	NA	NA	NA	NA	NA	NA	NA	NA	NA	NA	NA	NA	NA	NA	NA	NA	NA	NA	NA	37.7232	NA	15.4415	-5.96808	NA	NA	NA	90.7846	NA	NA	NA	NA	NA	NA	NA	NA
MINOS1-NBL1_P1P2	43.2459	NA	69.1174	NA	-24.8688	NA	48.9655	5.13616	NA	NA	NA	79.3122	-6.56453	-2.81764	NA	NA	NA	NA	36.4029	-57.2457	-31.0913	-3.44972	-8.94411	-26.4086	-65.2726	-46.2375	34.7724	-53.3537	-14.5447	-62.709	-51.9219	-17.0969	-47.3519	NA	NA	NA	NA	NA	NA	NA	3.12313	NA	-4.89434	NA	NA	NA	NA	NA	NA
MINOS1_P1P2	43.2459	NA	69.1174	NA	-24.8688	NA	46.262	4.83898	4.29326	NA	NA	79.3122	-6.56453	-2.81764	NA	NA	NA	NA	36.2357	-57.2457	-31.0913	-5.16043	-8.51049	-26.6192	-64.9365	-46.1028	34.6326	-53.3537	-35.8297	-62.709	-51.9219	-17.0969	-47.3519	NA	NA	NA	NA	NA	NA	NA	5.18234	NA	NA	NA	NA	NA	-7.91232	NA	NA
GBF1_P1P2	38.468	NA	64.9181	NA	35.1756	NA	41.473	3.53468	NA	NA	NA	69.1564	NA	NA	NA	NA	NA	NA	NA	NA	NA	NA	NA	NA	NA	NA	NA	NA	NA	NA	NA	NA	NA	NA	NA	24.1488	-5.40817	NA	NA	NA	24.4954	NA	NA	NA	NA	NA	-4.50557	-6.65343	NA
ZC3H4_P1	3.79007	NA	21.0871	34.5626	-1.90015	NA	11.0066	NA	NA	NA	NA	9.05855	NA	NA	NA	NA	NA	NA	NA	NA	NA	NA	NA	NA	NA	NA	NA	NA	NA	NA	NA	NA	NA	NA	NA	NA	NA	NA	NA	NA	NA	NA	NA	NA	NA	NA	NA	NA	NA
MIS12_P1P2	41.9971	NA	60.5123	NA	13.4507	NA	34.8394	42.0781	NA	NA	NA	64.11	NA	-10.0059	NA	NA	NA	NA	NA	NA	NA	NA	NA	NA	NA	NA	NA	NA	NA	NA	NA	NA	NA	NA	NA	NA	NA	NA	NA	NA	35.6239	NA	NA	NA	NA	NA	NA	NA	NA
CBLN2_P1P2	4.333	NA	2.14617	NA	NA	NA	NA	NA	NA	NA	NA	NA	NA	NA	NA	NA	NA	NA	NA	NA	NA	NA	NA	NA	NA	NA	NA	NA	NA	NA	NA	NA	NA	NA	NA	NA	NA	NA	NA	NA	NA	NA	NA	NA	NA	NA	NA	NA	NA
MRPL37_P1P2	37.1191	-3.70325	49.8597	NA	NA	-22.0023	36.792	25.1679	NA	NA	NA	60.9309	NA	-6.23706	NA	NA	NA	NA	36.3226	-65.0657	-46.2813	-4.58819	-6.40556	-24.6688	-71.1888	-44.7929	33.0527	-43.859	-61.238	-78.1716	-66.5195	-45.3606	-59.61	NA	-3.52988	NA	-6.92021	NA	NA	NA	4.7691	NA	NA	NA	NA	NA	-6.53093	-9.09313	NA
PAK1IP1_P1P2	34.8697	NA	50.5339	NA	-33.4338	-10.0948	37.9928	NA	NA	3.2854	NA	58.4583	-17.7873	NA	NA	NA	NA	NA	NA	NA	NA	NA	NA	NA	NA	NA	NA	NA	NA	NA	NA	NA	NA	77.8256	-29.2181	9.30027	NA	NA	NA	NA	77.4065	NA	NA	NA	NA	NA	NA	NA	NA
RPS29_P1	19.9449	NA	41.8915	6.25267	-5.22233	NA	30.1173	25.0254	10.4818	NA	NA	47.2028	NA	NA	NA	NA	NA	NA	NA	NA	NA	NA	NA	NA	NA	NA	NA	NA	NA	NA	NA	NA	NA	NA	NA	13.466	NA	NA	NA	NA	37.6658	NA	5.14607	NA	NA	NA	NA	NA	NA
PSMD14_P1P2	33.6263	NA	63.2607	25.534	26.4375	NA	37.5337	32.1241	NA	-2.40938	NA	68.9114	NA	-10.3821	NA	NA	NA	NA	NA	NA	NA	NA	NA	NA	NA	NA	NA	NA	NA	NA	NA	NA	NA	NA	NA	NA	NA	NA	NA	NA	15.7615	NA	NA	NA	NA	NA	7.16795	NA	NA
POLRMT_P1P2	44.1964	-12.1156	51.3996	NA	NA	-33.3318	37.1293	11.3959	NA	1.92585	NA	69.9958	NA	NA	NA	NA	NA	NA	NA	NA	NA	NA	NA	NA	NA	NA	NA	NA	NA	NA	NA	NA	NA	NA	NA	NA	NA	NA	NA	NA	NA	NA	NA	NA	NA	NA	NA	NA	NA
TIMELESS_P1P2	40.9283	NA	67.1954	7.36911	NA	NA	42.849	NA	NA	-9.07753	NA	79.6029	-33.3125	NA	NA	NA	NA	NA	34.4163	-33.1501	-62.1915	-5.09226	-18.0204	-21.5178	-52.1576	-32.5025	34.5347	-42.7671	-87.3587	-52.8573	-58.2898	-37.7369	-33.5508	NA	NA	12.1827	NA	NA	NA	NA	34.9791	NA	NA	NA	NA	NA	NA	NA	NA
DKC1_P1P2	69.1241	NA	93.6047	NA	-72.5299	-22.9848	56.1272	19.1676	10.2754	2.9215	NA	97.9418	NA	-24.023	NA	NA	NA	NA	NA	NA	NA	NA	NA	NA	NA	NA	NA	NA	NA	NA	NA	NA	NA	NA	NA	8.75771	-8.03923	NA	NA	NA	19.5968	NA	NA	NA	NA	NA	NA	NA	NA
RNF113A_P1P2	24.241	NA	73.5128	NA	NA	NA	51.3086	NA	NA	NA	NA	78.1266	NA	-39.4163	NA	NA	NA	NA	NA	NA	NA	NA	NA	NA	NA	NA	NA	NA	NA	NA	NA	NA	NA	NA	NA	NA	NA	NA	NA	NA	NA	NA	NA	NA	NA	NA	NA	NA	NA
PSMD8_P1P2	3.62597	NA	50.4235	21.3602	13.2317	NA	27.3714	4.41804	NA	-2.91492	NA	14.2444	NA	NA	NA	NA	NA	NA	NA	NA	NA	NA	NA	NA	NA	NA	NA	NA	NA	NA	NA	NA	NA	NA	NA	17.713	NA	NA	NA	NA	NA	NA	NA	NA	NA	NA	NA	NA	NA
NDUFB6_P1P2	4.65763	-2.83032	7.62345	NA	NA	NA	NA	NA	NA	NA	NA	8.06656	NA	NA	NA	NA	NA	NA	NA	NA	NA	NA	NA	NA	NA	NA	NA	NA	NA	NA	NA	NA	NA	NA	NA	NA	NA	NA	NA	NA	6.48202	NA	1.36833	NA	NA	-13.619	NA	NA	NA
CLTC_P1P2	45.4231	NA	68.8148	NA	10.9533	NA	42.8928	NA	NA	NA	NA	66.5553	NA	NA	NA	NA	NA	NA	NA	NA	NA	NA	NA	NA	NA	NA	NA	NA	NA	NA	NA	NA	NA	NA	NA	3.01621	NA	NA	NA	NA	25.9432	NA	-2.62674	NA	NA	NA	-3.60161	-3.54305	NA
PWP1_P1P2	9.31741	NA	13.3059	NA	-12.4627	-2.48497	21.6867	6.34099	NA	NA	NA	24.8834	-8.11961	NA	NA	NA	NA	NA	16.0006	-32.9028	-29.4045	NA	NA	-10.9951	-11.8897	-14.5626	30.5748	-19.2926	-24.5127	-53.4154	NA	-7.32867	-25.3919	NA	NA	NA	NA	NA	NA	NA	NA	NA	NA	NA	NA	NA	NA	NA	NA
RPIA_P1P2	14.3993	NA	24.0087	NA	NA	-7.60659	28.6165	NA	NA	NA	NA	19.4444	-15.3138	-10.8286	14.2612	NA	5.82121	28.2867	NA	NA	NA	NA	NA	NA	NA	NA	NA	NA	NA	NA	NA	NA	NA	NA	NA	NA	NA	NA	NA	NA	NA	NA	NA	NA	NA	NA	NA	NA	NA
MED14_P1P2	53.8816	NA	81.6201	NA	NA	NA	40.4173	NA	NA	26.8356	NA	92.1475	NA	-20.0624	NA	NA	NA	NA	40.8609	-71.4121	-59.5023	-44.7979	-38.201	-36.4705	-96.5172	-69.3652	42.1101	-46.3782	-111.729	-97.3591	-65.3121	-48.7163	-81.7506	NA	-6.73585	5.05055	-7.71078	NA	NA	NA	NA	NA	NA	NA	NA	NA	NA	NA	NA
SRFBP1_P1P2	52.9795	-24.5181	70.9869	NA	-27.202	-33.0513	51.6903	NA	NA	8.58914	NA	72.3965	-6.87582	-7.77099	NA	NA	NA	NA	NA	NA	NA	NA	NA	NA	NA	NA	NA	NA	NA	NA	NA	NA	NA	NA	NA	6.03181	NA	NA	NA	NA	25.0254	-7.31675	NA	NA	NA	NA	NA	NA	NA
PPP1R13L_P2	6.21664	NA	2.44797	NA	NA	NA	NA	NA	NA	NA	NA	NA	NA	NA	NA	NA	NA	NA	NA	NA	NA	NA	NA	NA	NA	NA	NA	NA	NA	NA	NA	NA	NA	NA	NA	NA	NA	NA	NA	NA	NA	NA	NA	NA	NA	NA	NA	NA	NA
GON4L_P1	5.10006	NA	10.7133	NA	-4.25794	-2.83195	NA	NA	NA	NA	NA	10.788	NA	-6.75055	2.38468	NA	NA	NA	NA	NA	NA	NA	NA	NA	NA	NA	NA	NA	NA	NA	NA	NA	NA	NA	NA	NA	NA	NA	NA	NA	13.5415	NA	NA	NA	NA	NA	NA	NA	NA
PRPF18_P1P2	42.491	NA	34.107	NA	NA	NA	26.3627	7.7564	NA	-2.79004	NA	43.4292	NA	-3.64532	NA	NA	NA	NA	NA	NA	NA	NA	NA	NA	NA	NA	NA	NA	NA	NA	NA	NA	NA	NA	NA	NA	NA	NA	NA	NA	NA	NA	NA	NA	NA	NA	NA	NA	NA
CCNK_P1	7.33555	-10.2984	10.1516	-34.8633	-16.9112	-14.1626	15.7128	NA	NA	-2.67978	NA	13.9836	-16.8298	NA	7.16115	-4.96993	NA	NA	NA	NA	NA	NA	NA	NA	NA	NA	NA	NA	NA	NA	NA	NA	NA	NA	NA	NA	NA	NA	NA	NA	NA	NA	NA	NA	NA	NA	NA	NA	NA
CEP44_P1P2	15.5699	NA	20.5485	NA	NA	NA	28.0443	NA	NA	NA	NA	15.9377	NA	-14.4755	14.9042	NA	NA	NA	NA	NA	NA	NA	NA	NA	NA	NA	NA	NA	NA	NA	NA	NA	NA	NA	NA	NA	NA	NA	NA	NA	NA	NA	NA	NA	NA	NA	NA	NA	NA
SOD1_P1P2	43.9183	-5.04584	49.7213	24.7099	NA	-11.6613	44.015	NA	NA	-6.05822	NA	70.7263	-39.6042	NA	NA	NA	NA	NA	NA	NA	NA	NA	NA	NA	NA	NA	NA	NA	NA	NA	NA	NA	NA	NA	NA	8.01146	NA	NA	NA	NA	NA	NA	NA	NA	NA	NA	NA	-10.2769	NA
SUPV3L1_P1P2	34.6596	-4.02235	65.1722	4.74755	NA	-22.4563	61.7069	4.62161	NA	23.6491	NA	73.1172	NA	-6.7685	NA	NA	NA	NA	37.5833	-50.9354	-42.0598	-5.48071	NA	-22.3387	-59.5482	-45.1662	43.6444	-38.5836	-53.4612	-70.1844	-56.4211	-34.5751	-49.5765	62.2413	-19.8329	NA	NA	NA	NA	NA	26.5556	NA	NA	NA	NA	NA	NA	-31.3411	NA
RPS15A_P1P2	32.1312	NA	56.8349	NA	9.40754	NA	26.5612	40.8655	NA	NA	NA	48.0629	NA	NA	NA	NA	NA	NA	NA	NA	NA	NA	NA	NA	NA	NA	NA	NA	NA	NA	NA	NA	NA	NA	NA	20.0178	-13.3877	NA	NA	NA	21.5797	NA	NA	NA	NA	NA	NA	NA	NA
FBXO5_P1P2	15.5463	NA	29.8308	NA	25.4337	NA	11.262	29.3361	NA	-2.12387	NA	15.2447	NA	NA	NA	NA	NA	NA	NA	NA	NA	NA	NA	NA	NA	NA	NA	NA	NA	NA	NA	NA	NA	3.4245	NA	6.3729	NA	NA	NA	NA	NA	NA	NA	NA	NA	NA	NA	NA	NA
GINS3_P1P2	22.8092	NA	30.0813	NA	7.45775	NA	20.721	18.6408	NA	-2.90507	NA	22.5196	NA	NA	NA	NA	NA	NA	NA	NA	NA	NA	NA	NA	NA	NA	NA	NA	NA	NA	NA	NA	NA	28.6594	NA	13.3701	-5.4248	NA	NA	NA	29.0042	NA	NA	NA	NA	NA	NA	NA	NA
TOP1_P1P2	34.0203	-13.618	45.5964	11.2171	-19.4696	-16.9276	43.5146	NA	NA	NA	NA	59.4697	-22.752	-63.832	NA	NA	NA	NA	NA	NA	NA	NA	NA	NA	NA	NA	NA	NA	NA	NA	NA	NA	NA	NA	NA	NA	NA	NA	NA	NA	NA	NA	NA	NA	NA	NA	NA	NA	16.2266
CDC16_P1P2	32.4858	NA	58.2868	NA	22.0993	NA	38.2741	33.1757	NA	NA	NA	59.8312	NA	NA	NA	NA	NA	NA	NA	NA	NA	NA	NA	NA	NA	NA	NA	NA	NA	NA	NA	NA	NA	NA	NA	11.3286	-13.7314	NA	NA	NA	72.5176	NA	NA	NA	NA	NA	NA	NA	NA
HCCS_P1P2	16.8996	NA	35.554	NA	NA	-13.2159	34.4698	NA	NA	NA	NA	58.0457	NA	-28.3065	8.79832	31.3636	3.06506	NA	14.3136	-60.7001	-50.7086	NA	-16.5351	-19.7367	-57.469	-49.3543	33.5099	-53.3727	-72.9364	-76.4428	-74.1766	-49.3908	-49.0831	NA	NA	NA	-5.61125	NA	NA	NA	NA	NA	NA	NA	NA	NA	NA	-21.7326	NA
MTA1_P1P2	5.24218	NA	NA	NA	NA	NA	2.66064	-1.67989	NA	NA	NA	NA	NA	NA	NA	NA	3.23711	NA	NA	NA	NA	NA	NA	NA	NA	NA	NA	NA	NA	NA	NA	NA	NA	NA	NA	NA	NA	NA	NA	NA	NA	NA	NA	NA	NA	NA	NA	NA	NA
RPL23_P1P2	44.4099	NA	63.0907	NA	-1.88719	NA	27.5967	20.5352	NA	NA	NA	29.2428	NA	NA	NA	NA	NA	NA	NA	NA	NA	NA	NA	NA	NA	NA	NA	NA	NA	NA	NA	NA	NA	NA	NA	21.5263	-8.9756	NA	NA	NA	72.7392	NA	NA	NA	NA	NA	NA	NA	NA
TMEM255B_P1P2	1.89426	NA	NA	NA	NA	NA	NA	NA	NA	NA	NA	NA	NA	NA	NA	NA	NA	NA	NA	NA	NA	NA	NA	NA	NA	NA	NA	NA	NA	NA	NA	NA	NA	NA	NA	NA	NA	NA	NA	NA	NA	NA	NA	NA	NA	NA	NA	NA	NA
ZNHIT6_P1P2	48.3503	-21.2333	56.4344	NA	-22.1914	-37.6457	53.5515	23.6366	NA	NA	NA	70.6577	-20.2401	-32.6671	NA	NA	NA	NA	37.3815	-43.3439	-37.9598	26.8201	NA	-12.3305	-31.9958	-32.084	42.3835	-29.5253	-38.441	-58.9024	-26.2807	-18.9989	-34.2245	NA	NA	NA	NA	NA	NA	NA	19.35	-7.04918	3.0421	NA	NA	NA	NA	NA	NA
LIN52_P1P2	46.2647	-4.428	80.6635	NA	17.3253	NA	50.3102	9.18861	NA	NA	NA	97.1122	NA	NA	NA	NA	NA	NA	NA	NA	NA	NA	NA	NA	NA	NA	NA	NA	NA	NA	NA	NA	NA	41.2738	-16.5242	NA	NA	NA	NA	NA	42.9544	NA	NA	NA	NA	NA	NA	NA	NA
TARS2_P1P2	57.0546	-7.54784	69.1223	NA	NA	-15.5426	69.4377	NA	NA	18.2359	NA	91.6619	NA	-7.32951	NA	NA	NA	NA	49.3726	-72.4456	-65.0072	-3.93222	-12.0627	-36.845	-86.6462	-59.6239	47.8648	-34.3138	-58.749	-56.5658	-60.2318	-42.6445	-48.3726	5.10547	NA	NA	-1.14446	NA	NA	NA	6.11831	NA	NA	NA	NA	-20.967	NA	-15.1982	NA
ARGLU1_P1P2	26.4457	NA	33.0231	18.6983	13.2613	-21.5154	25.8037	19.147	NA	NA	NA	24.6153	NA	-2.9981	8.73467	NA	NA	NA	NA	NA	NA	NA	NA	NA	NA	NA	NA	NA	NA	NA	NA	NA	NA	NA	NA	4.42623	NA	NA	NA	NA	11.7936	NA	NA	NA	NA	NA	NA	NA	NA
NUP155_P1P2	19.2019	NA	23.223	NA	NA	NA	21.4496	NA	NA	NA	NA	22.267	NA	NA	NA	NA	NA	NA	NA	NA	NA	NA	NA	NA	NA	NA	NA	NA	NA	NA	NA	NA	NA	NA	NA	NA	NA	NA	NA	NA	NA	NA	NA	NA	NA	NA	NA	NA	NA
TTI1_P1P2	68.4213	3.19332	97.605	NA	NA	NA	62.3536	NA	NA	6.95835	NA	99.5869	NA	-12.8423	NA	NA	NA	NA	45.8216	-63.4017	-33.271	NA	NA	-29.6598	-74.0116	-44.2462	47.6153	-15.0883	-56.6622	-52.8903	-57.4999	-42.2151	-47.5938	25.7788	-4.7473	NA	NA	NA	NA	NA	15.2305	NA	NA	NA	NA	NA	NA	NA	NA
RFC1_P1P2	24.5668	NA	29.0573	NA	NA	NA	7.36102	42.5622	NA	-3.06722	NA	18.1888	NA	-4.2383	NA	NA	NA	NA	NA	NA	NA	NA	NA	NA	NA	NA	NA	NA	NA	NA	NA	NA	NA	NA	NA	6.65166	NA	NA	NA	NA	NA	NA	-5.93049	NA	NA	NA	NA	NA	NA
YLPM1_P1P2	6.64969	NA	5.95962	NA	NA	NA	7.83783	-12.3461	NA	NA	NA	8.44502	NA	NA	NA	NA	NA	NA	9.68117	-38.5032	-35.9887	NA	NA	-10.3536	-17.9065	-18.3994	9.51607	-33.4369	-65.8507	-79.9837	-15.5544	-28.6004	-45.3984	21.2443	-5.3662	NA	NA	NA	NA	NA	NA	NA	NA	NA	NA	NA	NA	NA	NA
CEP192_P1P2	43.4175	NA	69.76	NA	NA	NA	47.0642	NA	NA	-3.4597	NA	70.072	-4.59344	-10.8017	NA	NA	NA	NA	NA	NA	NA	NA	NA	NA	NA	NA	NA	NA	NA	NA	NA	NA	NA	54.024	-7.08331	12.2216	NA	NA	NA	NA	44.9543	NA	NA	NA	NA	NA	NA	NA	NA
GNPNAT1_P1P2	7.61887	29.603	25.8611	7.20054	6.49591	25.9033	25.8379	3.57326	NA	NA	NA	16.5659	NA	-0.820314	23.1954	NA	7.28531	NA	NA	NA	NA	NA	NA	NA	NA	NA	NA	NA	NA	NA	NA	NA	NA	NA	NA	NA	-3.04291	NA	NA	NA	NA	NA	-11.9006	NA	NA	NA	NA	NA	NA
COPA_P1P2	57.5105	NA	92.8189	33.7434	17.7605	36.5313	54.0329	NA	NA	-10.3975	NA	65.9151	NA	0.695552	NA	NA	NA	NA	NA	NA	NA	NA	NA	NA	NA	NA	NA	NA	NA	NA	NA	NA	NA	67.167	NA	27.5808	NA	NA	NA	NA	74.9222	NA	2.31464	NA	NA	NA	NA	NA	NA
RPL19_P1P2	59.3258	NA	55.3062	NA	-10.9096	NA	66.3191	NA	NA	NA	NA	23.7786	NA	NA	NA	NA	NA	NA	NA	NA	NA	NA	NA	NA	NA	NA	NA	NA	NA	NA	NA	NA	NA	36.0883	NA	11.4477	NA	NA	NA	NA	96.1101	NA	NA	NA	NA	NA	NA	NA	NA
POLA1_P1P2	29.9661	NA	45.5463	NA	20.9064	NA	18.8922	23.1162	NA	-2.50672	NA	25.0806	NA	NA	NA	NA	NA	NA	NA	NA	NA	NA	NA	NA	NA	NA	NA	NA	NA	NA	NA	NA	NA	NA	NA	7.81279	NA	NA	NA	NA	13.342	NA	-8.6696	NA	NA	NA	NA	NA	NA
PSMB7_P1P2	25.8065	NA	51.6369	12.7071	36.5076	NA	34.177	21.1198	NA	NA	NA	25.6852	NA	NA	NA	NA	NA	NA	NA	NA	NA	NA	NA	NA	NA	NA	NA	NA	NA	NA	NA	NA	NA	NA	NA	15.4981	-3.72873	NA	NA	NA	20.1681	NA	NA	NA	NA	NA	NA	NA	NA
PES1_P1P2	38.7861	-4.56407	66.7413	NA	-13.6043	-6.90407	40.2728	NA	NA	NA	NA	74.8113	NA	NA	NA	NA	NA	NA	NA	NA	NA	NA	NA	NA	NA	NA	NA	NA	NA	NA	NA	NA	NA	NA	NA	NA	NA	NA	NA	NA	67.1559	NA	NA	NA	NA	NA	NA	NA	NA
MCTS1_P1P2	8.56484	NA	3.49713	NA	-2.13571	NA	14.8434	NA	NA	-5.79203	NA	2.41816	NA	NA	5.63972	-12.5371	3.55556	NA	NA	NA	NA	NA	NA	NA	NA	NA	NA	NA	NA	NA	NA	NA	NA	NA	NA	NA	NA	NA	NA	NA	NA	NA	NA	NA	NA	NA	NA	NA	4.27099
NSL1_P1P2	23.2158	NA	29.0275	NA	23.273	NA	21.8128	NA	NA	NA	NA	16.4073	NA	NA	NA	NA	NA	NA	NA	NA	NA	NA	NA	NA	NA	NA	NA	NA	NA	NA	NA	NA	NA	NA	NA	NA	NA	NA	NA	NA	18.028	NA	-5.86163	NA	NA	NA	NA	NA	NA
NRDE2_P1P2	69.4958	NA	134.423	NA	28.1718	NA	73.1858	NA	NA	NA	NA	80.2366	NA	NA	NA	NA	NA	NA	NA	NA	NA	NA	NA	NA	NA	NA	NA	NA	NA	NA	NA	NA	NA	60.0057	NA	6.57353	NA	NA	NA	NA	105.296	NA	-3.43074	NA	NA	NA	NA	NA	NA
ADSL_P1P2	22.2657	NA	45.1813	NA	NA	NA	29.3658	NA	NA	-1.85292	NA	27.8923	-4.63815	-15.0392	NA	NA	NA	NA	30.2034	-31.0105	-25.056	NA	NA	-11.7132	-12.6566	-13.2337	33.6442	-11.729	-37.3681	-38.0126	-36.3793	-8.27546	-27.2787	NA	NA	NA	NA	NA	NA	NA	27.6849	NA	NA	NA	NA	NA	-3.58987	-6.44957	NA
EIF1AX_P1P2	12.2712	NA	28.1123	NA	25.022	NA	9.67013	NA	NA	NA	NA	9.47993	NA	-1.61679	NA	NA	NA	NA	NA	NA	NA	NA	NA	NA	NA	NA	NA	NA	NA	NA	NA	NA	NA	NA	NA	NA	NA	NA	NA	NA	NA	NA	NA	NA	NA	NA	NA	-5.89422	NA
ZC3H8_P1P2	65.5417	NA	102.766	NA	NA	NA	49.8652	NA	NA	4.17765	NA	122.419	-16.3554	-5.84218	NA	NA	6.69549	NA	NA	NA	NA	NA	NA	NA	NA	NA	NA	NA	NA	NA	NA	NA	NA	63.8215	-13.2516	18.2081	-1.75082	NA	NA	NA	46.5182	NA	NA	NA	NA	NA	NA	NA	NA
LARS_P1P2	27.3083	NA	36.9824	4.95368	NA	NA	28.8142	NA	NA	NA	NA	35.882	NA	NA	NA	NA	NA	NA	NA	NA	NA	NA	NA	NA	NA	NA	NA	NA	NA	NA	NA	NA	NA	NA	NA	7.73935	NA	NA	NA	NA	NA	NA	NA	NA	NA	NA	NA	-5.60989	NA
UTP14C_P1P2	6.93777	NA	5.43813	NA	NA	NA	NA	NA	NA	NA	NA	9.28299	NA	NA	NA	NA	NA	NA	NA	NA	NA	NA	NA	NA	NA	NA	NA	NA	NA	NA	NA	NA	NA	NA	NA	NA	NA	NA	NA	NA	NA	NA	NA	NA	NA	NA	NA	NA	NA
ALG11_P1P2	6.93777	NA	5.43813	NA	NA	NA	NA	NA	NA	NA	NA	9.28299	NA	NA	NA	NA	NA	NA	NA	NA	NA	NA	NA	NA	NA	NA	NA	NA	NA	NA	NA	NA	NA	NA	NA	NA	NA	NA	NA	NA	NA	NA	NA	NA	NA	NA	-15.4675	-9.44667	NA
MFSD2B_P1P2	2.16178	NA	NA	NA	NA	NA	NA	NA	NA	NA	NA	NA	NA	NA	NA	NA	NA	NA	NA	NA	NA	NA	NA	NA	NA	NA	NA	NA	NA	NA	NA	NA	NA	NA	NA	NA	NA	NA	NA	NA	NA	NA	2.2769	NA	NA	NA	NA	NA	NA
EIF3H_P1P2	42.6208	NA	42.9994	-12.1219	39.2512	NA	37.2646	-7.4986	NA	5.188	NA	74.2092	NA	-13.2327	23.0697	NA	NA	NA	33.7817	-47.884	-56.4652	NA	-5.61776	-22.4001	-58.903	-62.48	33.2258	-49.1491	-102.414	-110.263	-63.7578	-40.4297	-63.4986	NA	NA	NA	-10.8508	NA	NA	NA	8.46151	4.55898	NA	NA	NA	NA	NA	-29.8429	NA
SMN1_ENST00000380707.4	60.314	NA	60.7203	NA	17.7635	-3.39785	41.9738	8.20436	NA	-4.61402	NA	72.2778	NA	-9.59341	NA	NA	NA	NA	NA	NA	NA	NA	NA	NA	NA	NA	NA	NA	NA	NA	NA	NA	NA	NA	NA	8.89276	NA	NA	NA	NA	33.1865	NA	NA	NA	NA	NA	NA	NA	NA
SLC7A6OS_P1P2	30.7006	NA	37.5902	NA	NA	NA	24.5967	NA	NA	NA	NA	23.169	-2.85568	-4.98142	NA	NA	NA	NA	24.9406	-27.9713	-19.5773	-1.464	NA	-9.99262	-27.2929	-16.0106	27.7088	-9.07997	-30.3709	-42.6269	-1.93742	NA	-26.0356	NA	NA	NA	NA	NA	NA	NA	NA	NA	NA	NA	NA	NA	NA	NA	NA
SF3B5_P1P2	31.8573	NA	57.2898	NA	NA	NA	31.8275	23.3832	NA	NA	NA	27.3094	NA	NA	NA	NA	NA	NA	NA	NA	NA	NA	NA	NA	NA	NA	NA	NA	NA	NA	NA	NA	NA	NA	NA	NA	NA	NA	NA	NA	10.8065	NA	NA	NA	NA	NA	NA	NA	NA
RPP30_P1P2	67.7529	-7.85927	103.391	NA	-9.82259	-13.3876	75.0562	21.1693	4.10043	-15.6772	NA	100.507	NA	-4.76201	NA	NA	NA	NA	NA	NA	NA	NA	NA	NA	NA	NA	NA	NA	NA	NA	NA	NA	NA	72.055	NA	NA	NA	NA	NA	NA	87.2977	NA	NA	NA	NA	NA	NA	NA	NA
GFI1B_P1P2	31.3306	10.9912	51.5155	-5.12115	NA	23.0044	59.9191	-9.42065	NA	40.1363	NA	53.3325	NA	-13.3251	15.4821	NA	12.0079	NA	31.3105	-54.7126	-44.6227	-10.0421	29.8642	-22.024	-50.0591	-71.8491	30.5166	-62.9937	-69.9494	-96.7546	-47.4628	-29.7385	-76.2404	NA	NA	NA	NA	NA	NA	NA	NA	NA	NA	NA	NA	NA	NA	NA	NA
FCF1_P1P2	59.1603	NA	85.7013	11.1542	-8.09595	NA	54.1266	51.0459	5.98242	9.48304	NA	84.9835	NA	NA	NA	NA	NA	NA	NA	NA	NA	NA	NA	NA	NA	NA	NA	NA	NA	NA	NA	NA	NA	40.3443	-22.2432	10.5685	-8.84087	NA	NA	NA	86.6335	-9.20928	5.09295	NA	NA	NA	NA	NA	NA
DERL2_P1P2	48.9089	NA	77.1148	NA	NA	-11.2019	72.1606	4.64598	NA	-3.04429	NA	72.6142	NA	NA	NA	NA	NA	NA	NA	NA	NA	NA	NA	NA	NA	NA	NA	NA	NA	NA	NA	NA	NA	NA	NA	NA	NA	NA	NA	NA	7.27569	NA	NA	NA	NA	NA	NA	NA	NA
PLK4_P1P2	22.8108	NA	30.7477	NA	NA	NA	26.6701	NA	NA	NA	NA	25.1055	NA	-12.06	16.9949	NA	NA	NA	NA	NA	NA	NA	NA	NA	NA	NA	NA	NA	NA	NA	NA	NA	NA	NA	NA	6.88003	-3.81896	NA	NA	NA	31.5385	NA	NA	NA	NA	NA	NA	NA	NA
CDK7_P1P2	24.9234	NA	32.7159	NA	NA	NA	34.6303	NA	NA	1.94259	NA	45.9464	NA	-10.0243	NA	NA	NA	NA	NA	NA	NA	NA	NA	NA	NA	NA	NA	NA	NA	NA	NA	NA	NA	NA	NA	2.94847	NA	NA	NA	NA	NA	NA	NA	NA	NA	NA	3.52719	NA	NA
RAD9B_P1P2	39.2971	NA	73.3087	-23.8073	-55.8947	NA	51.8496	NA	NA	3.75463	NA	80.1342	NA	-33.63	36.8288	NA	31.4955	NA	45.6383	-129.821	-115.246	-97.9727	-82.8888	-52.7185	-122.804	-88.7596	41.6485	-110.189	-176.722	-183.538	-126.703	-91.6565	-154.67	NA	NA	NA	NA	NA	NA	NA	NA	6.3428	NA	NA	NA	NA	NA	NA	12.0461
INTS2_P1P2	64.8891	NA	129.2	32.5499	38.7881	NA	85.5459	NA	6.53946	-8.31939	NA	89.7512	NA	-6.25166	NA	NA	NA	NA	NA	NA	NA	NA	NA	NA	NA	NA	NA	NA	NA	NA	NA	NA	NA	52.308	5.63364	20.1695	NA	NA	NA	NA	76.6948	NA	NA	NA	NA	NA	NA	NA	NA
WDR12_P1P2	59.0351	NA	90.4267	NA	-19.2486	-9.5951	60.9116	6.99682	NA	2.96867	NA	86.6428	NA	-9.18347	NA	NA	NA	NA	NA	NA	NA	NA	NA	NA	NA	NA	NA	NA	NA	NA	NA	NA	NA	9.45591	NA	4.11349	NA	NA	NA	NA	45.7081	NA	NA	NA	NA	NA	NA	NA	NA
PRPF4_P1P2	58.7501	NA	119.558	NA	12.0403	NA	77.877	16.1673	NA	NA	NA	73.0443	NA	NA	NA	NA	NA	NA	NA	NA	NA	NA	NA	NA	NA	NA	NA	NA	NA	NA	NA	NA	NA	19.0063	NA	9.5145	NA	NA	NA	NA	99.7723	NA	NA	NA	NA	NA	NA	NA	NA
SARS_P1P2	47.6685	NA	79.2221	NA	NA	NA	56.7388	10.6345	NA	5.23849	NA	78.0014	-5.40172	-18.383	NA	NA	NA	NA	NA	NA	NA	NA	NA	NA	NA	NA	NA	NA	NA	NA	NA	NA	NA	30.9552	NA	13.7509	-11.9622	NA	NA	NA	29.8067	NA	NA	NA	NA	NA	NA	NA	NA
SMU1_P1P2	46.1039	NA	106.675	8.1714	18.4072	NA	54.5264	47.1196	NA	-21.0963	NA	36.5245	NA	NA	NA	NA	NA	NA	NA	NA	NA	NA	NA	NA	NA	NA	NA	NA	NA	NA	NA	NA	NA	46.6538	NA	15.3316	NA	NA	NA	NA	95.4531	NA	NA	NA	NA	NA	NA	NA	NA
SLC35A1_P1P2	4.30371	-4.70928	59.2936	NA	NA	-40.9405	17.0067	9.17794	NA	NA	NA	8.9171	NA	NA	7.65	NA	NA	NA	NA	NA	NA	NA	NA	NA	NA	NA	NA	NA	NA	NA	NA	NA	NA	NA	NA	NA	NA	NA	NA	NA	NA	NA	-8.14729	NA	NA	NA	NA	NA	NA
RPS4X_P1P2	48.3431	NA	78.7957	NA	NA	NA	46.5676	50.0752	4.37552	NA	NA	37.2536	NA	-13.0663	NA	NA	NA	NA	NA	NA	NA	NA	NA	NA	NA	NA	NA	NA	NA	NA	NA	NA	NA	NA	NA	9.0914	NA	NA	NA	NA	25.8777	NA	NA	NA	NA	NA	NA	NA	NA
CTR9_P1P2	50.7829	NA	103.043	-6.38245	NA	-7.47553	56.9553	24.8799	NA	-14.8952	NA	90.8639	NA	-9.08976	20.0182	NA	NA	NA	NA	NA	NA	NA	NA	NA	NA	NA	NA	NA	NA	NA	NA	NA	NA	NA	NA	2.98562	NA	NA	NA	NA	15.0693	NA	NA	NA	NA	NA	NA	NA	NA
CEP41_P1P2	3.84117	NA	11.582	NA	NA	-6.7976	5.07746	NA	NA	NA	NA	3.44871	NA	NA	10.2899	NA	NA	NA	NA	NA	NA	NA	NA	NA	NA	NA	NA	NA	NA	NA	NA	NA	NA	NA	NA	NA	NA	NA	NA	NA	NA	NA	NA	NA	NA	NA	NA	NA	7.17699
WEE1_P1P2	13.1214	NA	13.5961	NA	NA	NA	NA	25.7643	NA	NA	NA	31.7571	NA	NA	NA	NA	NA	NA	NA	NA	NA	NA	NA	NA	NA	NA	NA	NA	NA	NA	NA	NA	NA	NA	NA	5.48716	NA	NA	NA	NA	12.9627	NA	NA	NA	NA	NA	NA	NA	NA
TIMM9_P1P2	41.3316	NA	57.5916	NA	NA	NA	41.8302	NA	NA	NA	NA	65.9195	NA	-13.5338	NA	NA	NA	NA	33.897	-51.8807	-45.9835	-10.1014	-7.4058	-24.4104	-70.5885	-52.5611	34.5724	-34.9231	-50.2528	-54.6015	-38.5948	-45.8954	-49.5527	NA	NA	NA	NA	NA	NA	NA	NA	NA	NA	NA	NA	NA	NA	-32.2976	NA
KPNB1_P1P2	20.2992	NA	44.0912	NA	39.2958	NA	16.3669	36.2729	NA	-16.8254	NA	20.4544	NA	4.64517	NA	NA	NA	NA	26.21	16.6441	NA	40.0294	16.8244	NA	29.8941	14.9203	30.138	23.1127	6.14802	NA	26.6526	1.9509	NA	NA	NA	9.3664	-4.77831	NA	NA	NA	14.0784	NA	NA	NA	NA	NA	NA	NA	NA
NUP35_P1P2	4.80912	NA	10.0552	NA	NA	11.3712	9.63588	NA	NA	NA	NA	5.95836	NA	-2.92184	NA	NA	NA	NA	NA	NA	NA	NA	NA	NA	NA	NA	NA	NA	NA	NA	NA	NA	NA	NA	NA	NA	NA	NA	NA	NA	7.30638	NA	NA	NA	NA	NA	NA	NA	NA
PSMD3_P1P2	9.20713	NA	34.5254	41.9486	27.5544	NA	16.0399	42.511	NA	NA	NA	21.8148	NA	-4.7315	12.8243	NA	NA	NA	NA	NA	NA	NA	NA	NA	NA	NA	NA	NA	NA	NA	NA	NA	NA	NA	NA	NA	-3.42143	NA	NA	NA	6.5509	NA	-7.58023	NA	NA	NA	NA	NA	NA
MBTPS2_P1P2	27.4761	37.5601	44.6212	NA	-2.99858	41.1049	28.9416	NA	19.1278	NA	NA	26.6849	-39.4632	NA	28.822	NA	26.3778	-18.9806	NA	NA	NA	NA	NA	NA	NA	NA	NA	NA	NA	NA	NA	NA	NA	NA	NA	NA	NA	NA	NA	NA	7.88433	NA	NA	NA	NA	NA	-3.35024	-19.9472	NA
SPATA5L1_P1P2	32.6003	-1.16749	26.5898	NA	NA	-7.77629	31.5155	NA	NA	NA	NA	18.7705	-14.6026	-6.48156	NA	NA	NA	NA	NA	NA	NA	NA	NA	NA	NA	NA	NA	NA	NA	NA	NA	NA	NA	NA	NA	NA	NA	NA	NA	NA	NA	NA	NA	NA	NA	NA	NA	NA	NA
HDAC1_P1P2	3.98482	NA	7.25827	NA	NA	NA	9.53214	-14.1562	NA	5.56145	NA	4.4994	-3.96697	NA	NA	NA	NA	NA	NA	NA	NA	NA	NA	NA	NA	NA	NA	NA	NA	NA	NA	NA	NA	NA	NA	NA	NA	NA	NA	NA	NA	NA	NA	NA	NA	NA	NA	NA	NA
NACA_P1P2	18.7677	NA	36.84	NA	8.32594	NA	16.2757	12.4953	NA	NA	NA	28.9255	-8.55622	NA	NA	NA	NA	NA	NA	NA	NA	NA	NA	NA	NA	NA	NA	NA	NA	NA	NA	NA	NA	NA	NA	6.42267	-3.76548	NA	NA	NA	59.8332	NA	NA	NA	NA	NA	NA	NA	NA
DAXX_P1	7.27783	NA	NA	11.4648	NA	NA	NA	NA	NA	NA	NA	NA	NA	NA	NA	NA	NA	NA	NA	NA	NA	NA	NA	NA	NA	NA	NA	NA	NA	NA	NA	NA	NA	NA	NA	NA	NA	NA	NA	NA	NA	NA	NA	NA	NA	NA	NA	NA	NA
DICER1_P1P2	33.7551	NA	48.1611	3.38445	NA	NA	65.0571	NA	NA	NA	NA	59.8192	-9.6753	-11.3445	57.5409	NA	41.7959	NA	NA	NA	NA	NA	NA	NA	NA	NA	NA	NA	NA	NA	NA	NA	NA	NA	NA	NA	NA	NA	NA	NA	NA	NA	NA	NA	NA	NA	NA	NA	12.043
MRPL45_P1P2	4.06895	NA	NA	NA	NA	NA	NA	NA	NA	NA	NA	NA	NA	NA	NA	NA	NA	NA	NA	NA	NA	NA	NA	NA	NA	NA	NA	NA	NA	NA	NA	NA	NA	NA	NA	NA	NA	NA	NA	NA	NA	NA	NA	NA	NA	NA	-3.67245	-3.33473	NA
WDR82_P1P2	11.6625	NA	33.1493	23.0912	NA	NA	18.0897	NA	NA	8.94594	NA	23.8489	-6.25232	-5.61754	9.31972	NA	NA	NA	NA	NA	NA	NA	NA	NA	NA	NA	NA	NA	NA	NA	NA	NA	NA	NA	NA	NA	NA	NA	NA	NA	6.03398	NA	NA	NA	NA	NA	NA	NA	NA
CHERP_P1P2	28.4823	NA	37.3513	NA	NA	NA	34.5301	21.5502	NA	NA	NA	63.3784	NA	-15.0291	NA	NA	NA	NA	NA	NA	NA	NA	NA	NA	NA	NA	NA	NA	NA	NA	NA	NA	NA	NA	-10.5494	NA	NA	NA	NA	NA	NA	5.87144	NA	NA	NA	NA	NA	NA	NA
POLR3F_P1P2	28.7276	NA	55.8873	NA	NA	-7.37428	25.5725	NA	NA	-7.07726	NA	43.7787	-16.478	NA	NA	NA	NA	NA	NA	NA	NA	NA	NA	NA	NA	NA	NA	NA	NA	NA	NA	NA	NA	NA	NA	NA	NA	NA	NA	NA	NA	NA	NA	NA	NA	NA	NA	NA	NA
RPL9_P1P2	61.5091	NA	122.114	NA	-37.9187	NA	47.1192	13.0054	NA	NA	NA	72.0492	NA	NA	NA	NA	NA	NA	42.0061	-35.8807	-29.6304	NA	-15.7631	-8.36617	-5.39867	-20.8124	43.7504	-15.131	-35.8979	-51.1041	-2.90829	-5.79367	-41.2266	23.4786	NA	13.5051	NA	NA	NA	NA	86.9264	NA	NA	NA	NA	NA	NA	NA	NA
DBF4_P1P2	4.26097	NA	11.4439	NA	-13.8987	NA	4.37116	-7.25024	NA	NA	NA	3.08849	NA	12.2051	NA	NA	NA	NA	NA	NA	NA	NA	NA	NA	NA	NA	NA	NA	NA	NA	NA	NA	NA	NA	NA	NA	NA	NA	NA	NA	NA	NA	NA	NA	NA	NA	NA	NA	NA
MZT1_P1P2	45.6807	-8.42944	62.2143	NA	NA	NA	43.8142	NA	NA	-11.2588	NA	70.8515	NA	-13.6572	NA	NA	NA	NA	37.5015	-22.5177	NA	18.4493	-4.53465	-2.32714	-3.80694	-12.1649	40.1339	NA	NA	-19.5509	-18.274	NA	NA	NA	NA	NA	NA	NA	NA	NA	42.8764	NA	NA	NA	NA	NA	NA	NA	NA
DPH2_P1P2	7.38844	NA	21.4308	-80.6418	18.1058	NA	8.0271	4.82172	NA	NA	NA	14.7897	NA	-8.18321	NA	NA	NA	NA	NA	NA	NA	NA	NA	NA	NA	NA	NA	NA	NA	NA	NA	NA	NA	NA	NA	NA	NA	NA	NA	NA	6.63774	NA	NA	NA	NA	NA	NA	NA	NA
POLE_P1P2	17.7267	NA	51.2467	NA	18.8735	8.6377	35.03	6.87337	NA	-11.5234	NA	54.8894	NA	NA	NA	NA	NA	NA	NA	NA	NA	NA	NA	NA	NA	NA	NA	NA	NA	NA	NA	NA	NA	37.4342	NA	13.5563	NA	NA	NA	NA	NA	NA	-9.69814	NA	NA	NA	NA	NA	NA
RPA1_P1P2	36.9251	NA	61.5636	NA	11.8851	NA	17.5363	34.5626	NA	NA	NA	33.3458	NA	NA	NA	NA	NA	NA	NA	NA	NA	NA	NA	NA	NA	NA	NA	NA	NA	NA	NA	NA	NA	17.6008	NA	14.1507	NA	NA	NA	NA	18.8982	NA	NA	NA	NA	NA	NA	NA	NA
AQR_P1P2	60.2181	NA	98.7526	NA	17.4209	NA	57.836	NA	NA	-18.8104	NA	36.2054	NA	NA	NA	NA	NA	NA	NA	NA	NA	NA	NA	NA	NA	NA	NA	NA	NA	NA	NA	NA	NA	28.6882	NA	8.1124	NA	NA	NA	NA	80.1319	NA	NA	NA	NA	NA	NA	NA	NA
RPS27_P1P2	43.9982	NA	81.8175	NA	NA	NA	37.3302	45.2795	4.73627	3.08375	NA	61.816	NA	NA	NA	NA	7.55516	NA	NA	NA	NA	NA	NA	NA	NA	NA	NA	NA	NA	NA	NA	NA	NA	NA	NA	3.51744	-4.01506	NA	NA	NA	46.625	NA	NA	NA	NA	NA	NA	NA	NA
XPC_P1	10.7097	NA	10.5062	NA	NA	NA	4.44315	NA	NA	NA	NA	4.82073	NA	NA	NA	NA	NA	NA	NA	NA	NA	NA	NA	NA	NA	NA	NA	NA	NA	NA	NA	NA	NA	NA	NA	NA	NA	NA	NA	NA	NA	NA	NA	NA	NA	NA	NA	NA	NA
INTS12_P1P2	3.16245	NA	3.97671	6.92867	31.8908	NA	4.09279	NA	NA	-14.9441	NA	NA	NA	NA	NA	NA	NA	NA	NA	NA	NA	NA	NA	NA	NA	NA	NA	NA	NA	NA	NA	NA	NA	NA	NA	NA	NA	NA	NA	NA	4.48263	NA	NA	NA	NA	NA	NA	NA	NA
FAM32A_P1P2	10.2504	NA	28.1817	NA	17.7654	NA	20.4556	NA	NA	NA	NA	18.9845	NA	NA	NA	NA	NA	NA	NA	NA	NA	NA	NA	NA	NA	NA	NA	NA	NA	NA	NA	NA	NA	NA	NA	NA	NA	NA	NA	NA	7.91423	NA	NA	NA	NA	NA	NA	NA	NA
UTP3_P1P2	54.2473	NA	51.7033	5.10174	-3.44095	NA	46.0363	40.1959	7.25427	NA	NA	84.1659	NA	-7.91516	NA	NA	NA	NA	NA	NA	NA	NA	NA	NA	NA	NA	NA	NA	NA	NA	NA	NA	NA	NA	NA	3.17731	NA	NA	NA	NA	46.1266	NA	NA	NA	NA	NA	NA	NA	NA
PFDN2_P1P2	63.7553	NA	116.308	NA	NA	NA	72.4579	29.4761	9.00187	9.29253	NA	115.069	NA	NA	NA	NA	NA	NA	NA	NA	NA	NA	NA	NA	NA	NA	NA	NA	NA	NA	NA	NA	NA	94.1668	-26.361	12.91	-14.6163	NA	NA	NA	72.6227	NA	4.52857	NA	NA	NA	NA	3.50292	NA
CENPT_P1P2	50.6858	NA	101.308	NA	41.0963	NA	53.4324	48.1896	NA	NA	NA	96.4568	-18.2909	-46.7267	NA	NA	NA	NA	NA	NA	NA	NA	NA	NA	NA	NA	NA	NA	NA	NA	NA	NA	NA	86.1086	NA	NA	NA	NA	NA	NA	16.0471	NA	NA	NA	NA	NA	NA	NA	NA
NRF1_P1P2	12.7587	12.0192	27.2126	NA	NA	27.9721	20.5841	NA	NA	NA	NA	42.5353	16.1272	NA	NA	NA	NA	NA	21.3751	-44.19	-45.3242	-7.48513	-11.6996	-16.8167	-23.4758	-36.9975	28.6279	-31.4538	-58.1187	-49.9567	-21.8544	-27.0855	-30.0403	4.59512	NA	NA	NA	NA	NA	NA	NA	NA	-1.45074	NA	NA	NA	NA	NA	NA
ACACA_P1P2	10.587	NA	2.07112	NA	NA	NA	NA	NA	NA	NA	NA	NA	NA	NA	8.72962	NA	13.5574	2.80675	10.9658	-39.5798	-31.0493	NA	NA	-16.5786	-26.2776	-16.4566	6.01869	2.23999	-37.0734	-44.3768	-32.5022	-36.4868	-35.8323	NA	NA	NA	NA	NA	NA	NA	NA	NA	NA	NA	NA	NA	NA	-10.4711	NA
SMC1A_P1P2	56.2754	10.746	87.4121	NA	36.1982	6.66151	53.7703	46.8025	NA	-14.5236	NA	84.8736	NA	NA	NA	NA	NA	NA	NA	NA	NA	NA	NA	NA	NA	NA	NA	NA	NA	NA	NA	NA	NA	8.06272	NA	9.43202	NA	NA	NA	NA	37.6469	5.68982	NA	NA	NA	NA	NA	NA	39.3596
TYMS_P1P2	14.2757	NA	19.6535	NA	NA	6.77907	14.567	8.53233	NA	-16.9298	NA	11.6725	-10.4625	-35.1167	NA	NA	NA	NA	NA	NA	NA	NA	NA	NA	NA	NA	NA	NA	NA	NA	NA	NA	NA	NA	NA	NA	NA	NA	NA	NA	NA	NA	NA	NA	NA	NA	NA	NA	NA
RPL39_P1P2	29.5617	NA	61.381	NA	-24.8395	NA	32.39	13.0032	NA	NA	NA	67.5254	NA	NA	NA	NA	NA	NA	NA	NA	NA	NA	NA	NA	NA	NA	NA	NA	NA	NA	NA	NA	NA	NA	NA	4.68006	NA	NA	NA	NA	NA	NA	NA	NA	NA	NA	NA	NA	NA
NDUFC2_P1P2	3.61405	-3.4155	4.51188	NA	NA	NA	4.11671	NA	NA	NA	NA	8.95461	NA	-1.44862	9.34222	NA	3.74843	NA	NA	NA	NA	NA	NA	NA	NA	NA	NA	NA	NA	NA	NA	NA	NA	NA	NA	NA	NA	NA	NA	NA	NA	NA	NA	NA	NA	-7.84897	NA	NA	NA
PPCS_P1P2	38.713	NA	35.1075	16.5434	-4.64631	NA	43.5439	NA	2.84035	NA	NA	63.6549	-3.12375	-12.8866	NA	NA	NA	NA	NA	NA	NA	NA	NA	NA	NA	NA	NA	NA	NA	NA	NA	NA	NA	NA	NA	NA	NA	NA	NA	NA	5.81365	NA	NA	NA	NA	NA	NA	NA	37.7563
NUP188_P1P2	3.2357	NA	NA	NA	NA	3.73572	11.2844	NA	NA	NA	NA	NA	NA	NA	NA	NA	NA	NA	NA	NA	NA	NA	NA	NA	NA	NA	NA	NA	NA	NA	NA	NA	NA	NA	NA	NA	NA	NA	NA	NA	20.8919	NA	NA	NA	NA	NA	-1.66023	NA	NA
PAPOLG_P1P2	4.7564	NA	3.34662	NA	NA	NA	NA	NA	NA	NA	NA	NA	-1.68449	NA	NA	NA	NA	NA	NA	NA	NA	NA	NA	NA	NA	NA	NA	NA	NA	NA	NA	NA	NA	NA	NA	NA	NA	NA	NA	NA	NA	NA	NA	NA	NA	NA	NA	NA	NA
ELL_P1P2	4.55828	NA	4.5477	NA	NA	NA	NA	5.32152	NA	NA	NA	6.54772	-1.99346	-2.19572	NA	NA	NA	NA	NA	NA	NA	NA	NA	NA	NA	NA	NA	NA	NA	NA	NA	NA	NA	NA	NA	NA	NA	NA	NA	NA	NA	NA	NA	NA	NA	NA	NA	NA	NA
PET112_P1P2	37.3744	-11.7777	49.1192	NA	-3.78382	-29.0613	41.8025	5.9932	NA	5.93384	NA	64.576	-16.4156	-11.2968	NA	NA	NA	NA	39.3732	-60.8996	-41.4475	-8.16209	-5.22777	-25.5464	-61.4368	-38.6544	37.0427	-35.6303	-42.8363	-65.2275	-51.1346	-31.9763	-37.7188	NA	NA	NA	NA	NA	NA	NA	8.28828	NA	NA	NA	NA	NA	-10.836	-8.86059	NA
IER3IP1_P1P2	17.4568	31.6437	34.2018	-5.55764	-13.4555	47.8865	23.3217	NA	NA	NA	NA	20.1259	NA	-5.59467	NA	NA	NA	NA	NA	NA	NA	NA	NA	NA	NA	NA	NA	NA	NA	NA	NA	NA	NA	6.25982	NA	NA	NA	NA	NA	NA	NA	NA	NA	NA	NA	NA	NA	NA	NA
MED19_P1P2	57.9518	NA	62.4275	NA	NA	12.6586	36.6251	-3.18059	3.65261	33.6343	NA	89.8154	NA	-12.2301	NA	NA	NA	NA	38.9555	-85.9995	-79.7447	-57.5051	-54.6553	-39.577	-116.569	-90.2694	40.4955	-74.7274	-129.791	-125.658	-85.4816	-63.6332	-108.566	35.008	-29.1615	NA	NA	NA	NA	NA	-7.18846	16.3574	NA	NA	NA	NA	NA	NA	NA
MRPL13_P1P2	43.3087	-12.7826	61.46	NA	-3.51034	-7.03833	53.287	NA	NA	2.68553	NA	62.0697	NA	-8.16279	NA	NA	NA	NA	35.2513	-69.6298	-37.7236	-29.3217	-23.7262	-27.8842	-71.2108	-51.7741	37.0607	-40.6798	-64.4328	-69.2511	-66.9524	-48.0544	-55.629	NA	NA	NA	-8.53569	NA	NA	NA	20.7255	NA	NA	NA	NA	NA	-14.2103	-21.3799	NA
MRPS18B_P1P2	14.9889	-11.1002	39.4169	NA	NA	-12.85	24.2311	NA	NA	4.12137	NA	28.0055	NA	-3.91936	NA	NA	NA	NA	26.0038	-57.6597	-35.8652	-16.8958	-16.5653	-21.1104	-64.8136	-45.1371	27.6709	-38.6427	-51.956	-61.1001	-54.5771	-30.2314	-43.7772	6.28035	NA	NA	-9.16382	NA	NA	NA	16.0951	NA	NA	NA	NA	NA	-5.70781	-30.2582	NA
DNMT3L_P1P2	2.64552	NA	1.34538	NA	NA	NA	NA	NA	NA	NA	NA	NA	NA	NA	NA	NA	NA	NA	NA	NA	NA	NA	NA	NA	NA	NA	NA	NA	NA	NA	NA	NA	NA	NA	NA	NA	NA	NA	NA	NA	NA	NA	NA	NA	NA	NA	NA	NA	NA
TMEM126B_P1P2	19.2768	-18.073	25.1906	NA	NA	-21.7877	22.1374	NA	NA	NA	NA	31.6783	NA	-5.80817	7.60915	NA	NA	NA	13.156	-36.2267	-31.469	-19.3424	-13.8459	-23.0596	-40.3603	NA	13.6229	-27.3446	-38.4258	-47.8878	-44.4915	-27.4853	-30.8831	NA	NA	NA	NA	NA	NA	NA	4.05824	NA	2.54573	NA	NA	NA	NA	NA	NA
UFL1_P1P2	16.3039	2.48483	17.5434	NA	36.4319	7.65393	23.3661	NA	NA	5.63996	NA	11.131	-4.56488	2.53272	4.26282	12.9978	3.75536	NA	NA	NA	NA	NA	NA	NA	NA	NA	NA	NA	NA	NA	NA	NA	NA	NA	NA	NA	NA	NA	NA	NA	2.21761	NA	NA	NA	NA	NA	NA	NA	NA
NUF2_P1P2	22.7275	NA	67.2253	NA	51.7982	NA	32.9954	27.4476	NA	NA	NA	66.662	NA	NA	NA	NA	NA	NA	NA	NA	NA	NA	NA	NA	NA	NA	NA	NA	NA	NA	NA	NA	NA	19.3814	NA	6.00709	NA	NA	NA	NA	7.00824	NA	NA	NA	NA	NA	NA	NA	NA
U2SURP_P1P2	21.5084	NA	37.8734	NA	NA	NA	27.2868	3.98471	NA	NA	NA	51.2061	-2.61572	-9.93969	NA	NA	NA	NA	NA	NA	NA	NA	NA	NA	NA	NA	NA	NA	NA	NA	NA	NA	NA	NA	NA	NA	NA	NA	NA	NA	NA	NA	NA	NA	NA	NA	NA	NA	NA
NFE2L1_P1P2	4.35076	NA	9.4232	-4.17469	NA	-2.86538	14.0519	-14.8027	NA	NA	NA	3.24853	NA	-5.86477	NA	NA	NA	NA	NA	NA	NA	NA	NA	NA	NA	NA	NA	NA	NA	NA	NA	NA	NA	NA	NA	NA	NA	NA	NA	NA	NA	NA	NA	NA	NA	NA	NA	NA	NA
NDUFB1_P1P2	16.0382	-16.6241	12.0146	NA	NA	-10.8027	17.7351	8.9491	NA	NA	NA	12.3655	NA	-4.79539	NA	NA	4.87838	NA	14.961	-40.8409	-29.278	NA	NA	-11.7206	-20.4043	-13.181	20.2678	-34.9673	-54.3601	-62.4237	-35.0879	-33.8671	-37.9538	NA	NA	NA	NA	NA	NA	NA	NA	NA	NA	NA	NA	NA	NA	-10.2522	NA
CDC7_P1P2	14.6452	NA	12.5079	NA	NA	NA	11.8306	-8.2144	NA	NA	NA	14.5936	NA	NA	NA	NA	NA	NA	NA	NA	NA	NA	NA	NA	NA	NA	NA	NA	NA	NA	NA	NA	NA	NA	NA	NA	NA	NA	NA	NA	NA	NA	-2.02632	NA	NA	NA	NA	NA	NA
MAPK14_P1P2	11.4462	NA	21.9132	2.40701	-9.94529	NA	16.6767	-14.8329	NA	2.15958	NA	6.38596	9.62859	NA	7.74797	NA	NA	NA	18.5134	-54.1893	-55.0956	-37.9668	-22.6004	-29.5614	-75.6373	-49.423	16.015	-45.9452	-63.5966	-70.6937	-56.1297	-28.6653	-64.1971	NA	NA	NA	NA	NA	NA	NA	NA	NA	NA	NA	NA	NA	NA	NA	NA
ATXN10_P1P2	39.2435	NA	67.863	NA	-14.4472	-8.29391	56.8556	NA	NA	NA	NA	77.6377	-3.83499	-20.0383	NA	NA	6.70441	NA	43.5748	-34.3348	-29.2302	16.1055	NA	-14.7996	-39.6919	-25.4744	41.8462	-17.1068	-30.8978	-17.8219	-23.2799	-21.1437	NA	NA	NA	NA	NA	NA	NA	NA	7.72452	NA	NA	NA	NA	NA	NA	NA	12.6494
EIF3G_P1P2	30.2854	NA	74.8731	9.53613	35.2473	NA	27.6953	NA	NA	NA	NA	23.564	NA	NA	NA	NA	NA	NA	NA	NA	NA	NA	NA	NA	NA	NA	NA	NA	NA	NA	NA	NA	NA	65.2758	-15.6316	24.1022	-5.93898	NA	NA	NA	95.9176	NA	NA	NA	NA	NA	NA	NA	NA
RPL4_P1P2	39.9059	NA	58.2552	NA	NA	NA	22.2647	32.4348	NA	NA	NA	53.4163	NA	-3.76104	NA	NA	NA	NA	NA	NA	NA	NA	NA	NA	NA	NA	NA	NA	NA	NA	NA	NA	NA	NA	NA	16.3008	NA	NA	NA	NA	71.6562	NA	NA	NA	NA	NA	NA	-4.23645	NA
GNL2_P1P2	33.8803	-5.67454	59.2361	NA	-26.8073	-15.0176	30.1649	23.3786	NA	NA	NA	56.3821	NA	NA	NA	NA	NA	NA	NA	NA	NA	NA	NA	NA	NA	NA	NA	NA	NA	NA	NA	NA	NA	20.674	-12.9535	7.19811	NA	NA	NA	NA	71.2363	-14.862	NA	NA	NA	NA	NA	NA	NA
THOC1_P1P2	12.6333	4.93966	9.98376	NA	15.6646	8.13708	5.54071	14.3416	NA	NA	NA	15.022	NA	-1.35915	NA	NA	NA	NA	NA	NA	NA	NA	NA	NA	NA	NA	NA	NA	NA	NA	NA	NA	NA	32.0765	NA	9.68434	NA	NA	NA	NA	14.2791	NA	NA	NA	NA	NA	NA	NA	NA
NDUFC1_P1	13.3623	-7.82513	19.0317	NA	3.83077	-10.0876	14.2065	NA	NA	2.63512	NA	11.4762	NA	-4.92725	50.5969	NA	15.5142	NA	4.87622	-26.1915	-19.0723	-1.5643	-7.04733	NA	NA	NA	7.39318	-26.8869	-30.6503	-44.9811	-31.8691	-25.2339	-22.1247	NA	NA	3.62329	-4.9269	NA	NA	NA	NA	NA	2.59905	NA	NA	-8.80111	NA	-4.4744	NA
LONP1_P1P2	54.4143	-22.6417	68.6367	NA	NA	-26.0477	48.5515	NA	NA	NA	NA	81.2034	NA	NA	NA	NA	NA	NA	NA	NA	NA	NA	NA	NA	NA	NA	NA	NA	NA	NA	NA	NA	NA	69.0755	-44.0421	12.5699	-7.50579	NA	NA	NA	14.7641	NA	5.10052	NA	NA	NA	NA	-9.5813	NA
PPP1R15B_P1P2	18.7398	NA	6.15968	16.1598	NA	9.22938	9.28166	NA	NA	NA	NA	11.6585	11.9814	6.19381	NA	NA	5.54133	NA	NA	NA	NA	NA	NA	NA	NA	NA	NA	NA	NA	NA	NA	NA	NA	NA	NA	NA	NA	NA	NA	NA	NA	NA	NA	NA	NA	NA	NA	NA	NA
WDR7_P1P2	33.4439	NA	48.1352	-24.1174	8.00507	9.4847	49.6252	NA	NA	NA	NA	55.584	NA	-10.5215	23.2167	NA	6.76187	NA	33.8333	-47.8148	-52.2702	6.38874	26.8509	-15.5943	-38.6204	-50.2741	36.0734	-40.9341	-70.52	-55.4657	-41.354	-36.2969	-41.0488	NA	NA	NA	NA	NA	NA	NA	3.8878	-4.52522	NA	NA	NA	NA	NA	NA	NA
PTCD2_P1P2	6.47838	NA	12.8045	2.34721	NA	-6.71544	18.668	NA	NA	NA	NA	8.49466	NA	-3.06902	4.90833	NA	NA	NA	NA	NA	NA	NA	NA	NA	NA	NA	NA	NA	NA	NA	NA	NA	NA	NA	NA	NA	NA	NA	NA	NA	NA	NA	NA	NA	NA	NA	-6.67376	NA	NA
PSMB1_P1P2	23.0355	NA	42.6547	5.30247	40.2996	NA	32.5019	11.5969	NA	NA	NA	24.7963	NA	NA	NA	NA	NA	NA	NA	NA	NA	NA	NA	NA	NA	NA	NA	NA	NA	NA	NA	NA	NA	NA	NA	6.44699	NA	NA	NA	NA	NA	NA	NA	NA	NA	NA	NA	NA	NA
PET117_P1P2	28.2508	-11.5131	44.2101	36.3973	-29.9509	-28.1562	40.2913	15.6747	NA	NA	NA	47.7025	-8.37798	-26.5784	5.37916	NA	7.04844	NA	NA	NA	NA	NA	NA	NA	NA	NA	NA	NA	NA	NA	NA	NA	NA	NA	NA	NA	NA	NA	NA	NA	NA	NA	NA	NA	NA	NA	NA	10.7865	NA
CSRP2BP_P1P2	28.2508	-9.91317	39.0607	36.3973	-26.2034	-28.1562	40.2913	14.3896	NA	NA	NA	45.868	-9.26681	-25.5928	5.37916	NA	NA	NA	NA	NA	NA	NA	NA	NA	NA	NA	NA	NA	NA	NA	NA	NA	NA	NA	NA	NA	NA	NA	NA	NA	NA	NA	NA	NA	NA	NA	NA	NA	NA
TSSC1_P1P2	4.48736	NA	2.6968	-6.32331	NA	NA	NA	NA	NA	NA	NA	NA	NA	NA	NA	NA	NA	NA	NA	NA	NA	NA	NA	NA	NA	NA	NA	NA	NA	NA	NA	NA	NA	NA	NA	NA	NA	NA	NA	NA	NA	NA	NA	NA	NA	NA	NA	NA	NA
CDC5L_P1P2	50.5953	NA	99.909	NA	32.8837	NA	45.7224	37.5885	NA	-4.93152	NA	94.5123	NA	NA	NA	NA	NA	NA	NA	NA	NA	NA	NA	NA	NA	NA	NA	NA	NA	NA	NA	NA	NA	15.3693	NA	27.3844	NA	NA	NA	NA	88.6996	NA	NA	NA	NA	NA	NA	NA	NA
GRSF1_P1P2	31.8294	-21.7793	36.5422	4.59201	NA	-27.5009	48.5967	NA	NA	14.4374	NA	46.334	-3.07243	NA	NA	NA	NA	NA	21.2133	-53.9286	-27.8167	-9.21394	-4.31628	-23.3563	-62.2439	-29.8676	26.2098	-41.9358	-50.7618	-70.1398	-55.0253	-34.4983	-47.5623	3.78297	NA	NA	NA	NA	NA	NA	21.8289	NA	NA	NA	NA	NA	-9.46524	-3.72287	NA
NDUFB7_P1P2	5.98962	NA	9.08115	NA	3.43425	-8.14781	14.7272	NA	NA	NA	NA	7.84356	NA	NA	4.14281	NA	NA	NA	NA	NA	NA	NA	NA	NA	NA	NA	NA	NA	NA	NA	NA	NA	NA	NA	NA	NA	NA	NA	NA	NA	NA	NA	NA	NA	NA	-3.94063	NA	-5.44428	NA
DHX16_P1P2	42.0196	NA	42.5317	NA	18.1122	NA	32.4414	NA	NA	-3.22211	NA	60.5291	NA	-4.25233	NA	NA	NA	NA	NA	NA	NA	NA	NA	NA	NA	NA	NA	NA	NA	NA	NA	NA	NA	NA	NA	NA	NA	NA	NA	NA	6.58021	NA	NA	NA	NA	NA	NA	NA	NA
MRPS33_P1P2	51.2387	-13.5056	77.763	7.7005	NA	-34.6842	63.8718	NA	NA	13.7436	NA	97.1351	NA	-54.6994	NA	NA	NA	NA	44.4716	-82.2374	-64.2019	-11.8122	-10.621	-32.2353	-87.2937	-55.8956	49.9084	-22.4111	-77.3979	-74.857	-70.948	-50.0241	-54.4794	6.7165	NA	NA	-10.6982	NA	NA	NA	16.1683	NA	NA	NA	NA	NA	NA	-6.88283	NA
FIS1_P1	22.9954	-10.5927	30.0764	NA	15.3569	-22.3121	14.555	NA	NA	NA	NA	21.2251	-16.2333	-7.62605	NA	NA	NA	NA	NA	NA	NA	NA	NA	NA	NA	NA	NA	NA	NA	NA	NA	NA	NA	NA	NA	NA	NA	NA	NA	NA	NA	NA	NA	NA	NA	NA	NA	NA	NA
PRPF39_P1P2	16.648	15.4516	15.1101	NA	NA	29.0786	26.2759	NA	NA	NA	NA	NA	NA	NA	NA	NA	NA	NA	18.2727	-53.5497	-15.3581	-8.05187	16.9715	-18.6266	-34.4343	-8.72718	20.7305	-46.4459	-11.9444	-61.4126	-43.947	-21.7826	-39.0963	NA	NA	NA	-2.9454	NA	NA	NA	6.65484	NA	NA	NA	NA	NA	NA	NA	NA
C18orf56_P1P2	6.5675	2.83331	18.778	NA	NA	10.7769	8.53988	NA	NA	NA	NA	12.2918	-9.74343	-35.3859	10.9537	NA	NA	NA	NA	NA	NA	NA	NA	NA	NA	NA	NA	NA	NA	NA	NA	NA	NA	NA	NA	NA	NA	NA	NA	NA	NA	NA	NA	NA	NA	NA	NA	NA	NA
ANKHD1_P1P2	5.10066	NA	NA	NA	-2.70697	NA	1.73902	NA	NA	NA	NA	NA	NA	NA	5.25354	NA	NA	NA	NA	NA	NA	NA	NA	NA	NA	NA	NA	NA	NA	NA	NA	NA	NA	NA	NA	NA	NA	NA	NA	NA	NA	NA	NA	NA	NA	NA	NA	NA	NA
ANKHD1-EIF4EBP3_P1P2	5.10066	NA	NA	NA	-2.70697	NA	1.73902	NA	NA	NA	NA	NA	NA	NA	5.25354	NA	NA	NA	NA	NA	NA	NA	NA	NA	NA	NA	NA	NA	NA	NA	NA	NA	NA	NA	NA	NA	NA	NA	NA	NA	NA	NA	NA	NA	NA	NA	NA	NA	NA
RBMX2_P1P2	30.75	NA	83.6433	NA	NA	NA	54.5139	8.8533	NA	-13.3748	NA	48.861	NA	-6.91923	NA	NA	NA	NA	NA	NA	NA	NA	NA	NA	NA	NA	NA	NA	NA	NA	NA	NA	NA	NA	NA	11.6349	NA	NA	NA	NA	13.2544	NA	NA	NA	NA	NA	NA	NA	NA
MRE11A_P1P2	11.3205	NA	13.6651	NA	NA	NA	21.1315	NA	NA	NA	NA	11.2295	-2.16434	4.99098	6.15622	NA	NA	NA	NA	NA	NA	NA	NA	NA	NA	NA	NA	NA	NA	NA	NA	NA	NA	NA	NA	NA	NA	NA	NA	NA	NA	NA	NA	NA	NA	NA	NA	NA	NA
BRCA1_P1P2	13.4484	NA	11.6822	NA	12.2628	NA	14.6956	21.7323	NA	NA	NA	16.462	NA	31.2536	5.54135	NA	NA	NA	NA	NA	NA	NA	NA	NA	NA	NA	NA	NA	NA	NA	NA	NA	NA	6.05365	NA	7.18489	NA	NA	NA	NA	NA	NA	NA	NA	NA	NA	NA	NA	NA
WIZ_P1P2	5.48497	NA	8.49317	-1.96369	-1.51463	NA	6.12747	-10.1061	NA	NA	NA	6.87502	NA	NA	NA	NA	NA	NA	NA	NA	NA	NA	NA	NA	NA	NA	NA	NA	NA	NA	NA	NA	NA	NA	NA	NA	NA	NA	NA	NA	NA	NA	NA	NA	NA	NA	NA	NA	NA
BAIAP3_P1P2	9.04905	NA	NA	NA	NA	NA	NA	NA	NA	NA	NA	NA	NA	NA	NA	NA	NA	NA	NA	NA	NA	NA	NA	NA	NA	NA	NA	NA	NA	NA	NA	NA	NA	NA	NA	NA	NA	NA	NA	NA	NA	NA	NA	NA	NA	NA	NA	NA	NA
NUP88_P1P2	47.8214	NA	73.6365	NA	11.2316	NA	45.24	32.8987	NA	-2.99869	NA	23.2182	NA	NA	NA	NA	NA	NA	NA	NA	NA	NA	NA	NA	NA	NA	NA	NA	NA	NA	NA	NA	NA	11.6831	NA	4.49572	NA	NA	NA	NA	28.3144	NA	NA	NA	NA	NA	-6.9039	NA	NA
RMI1_P1P2	11.0155	NA	12.183	NA	NA	-4.45751	22.9968	NA	NA	-2.1289	NA	17.0063	-15.7979	-3.46304	8.11594	NA	NA	NA	NA	NA	NA	NA	NA	NA	NA	NA	NA	NA	NA	NA	NA	NA	NA	NA	NA	NA	NA	NA	NA	NA	NA	NA	NA	NA	NA	NA	NA	NA	NA
RPL35A_P1P2	37.6054	NA	59.1487	NA	NA	NA	24.52	NA	NA	NA	NA	67.6844	NA	NA	NA	NA	NA	NA	NA	NA	NA	NA	NA	NA	NA	NA	NA	NA	NA	NA	NA	NA	NA	NA	NA	8.3701	NA	NA	NA	NA	NA	NA	NA	NA	NA	NA	NA	NA	NA
EIF3A_P1P2	39.4162	NA	60.9518	NA	42.858	NA	31.5704	13.5641	NA	NA	NA	29.9009	NA	-5.49083	NA	NA	NA	NA	NA	NA	NA	NA	NA	NA	NA	NA	NA	NA	NA	NA	NA	NA	NA	98.5311	-13.3169	24.3498	-11.068	NA	NA	NA	60.7617	NA	NA	NA	NA	NA	NA	NA	NA
NDUFS8_P1P2	28.9527	-10.7746	35.97	NA	NA	-11.1738	22.8029	NA	NA	2.12944	NA	23.2592	NA	NA	NA	NA	NA	NA	14.9279	-46.6329	-29.0618	-20.9641	-18.8631	-22.034	-58.9601	-15.1371	15.1861	-30.9943	-39.3456	-55.7037	-52.5823	-32.2605	-32.8355	NA	NA	NA	NA	NA	NA	NA	3.54751	NA	1.66625	NA	NA	-14.8559	NA	-5.69702	NA
CPSF1_P1P2	46.159	NA	67.6073	NA	NA	-6.34859	39.4106	19.8591	NA	-6.95975	NA	67.0725	-26.0558	NA	NA	NA	NA	NA	NA	NA	NA	NA	NA	NA	NA	NA	NA	NA	NA	NA	NA	NA	NA	9.27196	-17.5443	8.28468	-14.4393	NA	NA	NA	55.9364	NA	14.0554	NA	NA	NA	-2.32871	NA	NA
RPA2_P1P2	48.1688	NA	98.3471	NA	35.9504	NA	68.3114	24.1696	NA	-6.87009	NA	86.1136	-11.1003	NA	NA	NA	NA	NA	NA	NA	NA	NA	NA	NA	NA	NA	NA	NA	NA	NA	NA	NA	NA	NA	NA	24.4982	NA	NA	NA	NA	112.177	NA	-7.40814	NA	NA	NA	NA	NA	NA
MVD_P1P2	36.9498	NA	69.6095	NA	6.75436	NA	31.5539	NA	NA	-2.98462	NA	69.1934	NA	-7.17055	NA	NA	NA	NA	NA	NA	NA	NA	NA	NA	NA	NA	NA	NA	NA	NA	NA	NA	NA	33.9549	NA	NA	NA	NA	NA	NA	NA	NA	7.35745	NA	NA	NA	NA	-4.77927	NA
SRP19_P1P2	36.7513	NA	49.378	NA	-6.73485	NA	22.2627	3.59654	NA	2.27007	NA	55.7636	NA	-11.2787	NA	NA	NA	NA	NA	NA	NA	NA	NA	NA	NA	NA	NA	NA	NA	NA	NA	NA	NA	NA	NA	6.54138	NA	NA	NA	NA	14.8734	NA	13.365	NA	NA	NA	NA	-24.3601	NA
FAM98B_P1P2	32.3682	NA	36.2824	NA	NA	-13.7672	42.1787	NA	NA	-2.50786	NA	48.9535	-32.4225	-9.02237	NA	NA	6.5954	NA	NA	NA	NA	NA	NA	NA	NA	NA	NA	NA	NA	NA	NA	NA	NA	NA	NA	NA	NA	NA	NA	NA	4.8181	NA	NA	NA	NA	NA	NA	NA	NA
CLASRP_P1P2	11.9405	-11.8233	9.62322	NA	-3.81987	-19.4292	4.83105	NA	NA	-5.96732	NA	9.57821	-12.6467	5.40776	NA	NA	NA	NA	NA	NA	NA	NA	NA	NA	NA	NA	NA	NA	NA	NA	NA	NA	NA	NA	NA	NA	NA	NA	NA	NA	NA	NA	NA	NA	NA	NA	NA	NA	6.18283
DET1_P1P2	5.84494	-4.39986	4.24307	5.01365	-9.7319	-12.0998	11.0918	-6.55469	NA	NA	NA	4.34968	-29.9247	-2.29808	NA	NA	NA	NA	NA	NA	NA	NA	NA	NA	NA	NA	NA	NA	NA	NA	NA	NA	NA	7.18272	-18.835	NA	NA	NA	NA	NA	6.76979	NA	NA	NA	NA	NA	NA	NA	NA
CHMP3_P1P2	38.3854	NA	53.9434	NA	21.0192	NA	42.9348	5.5849	NA	-4.35999	NA	66.846	NA	NA	NA	NA	NA	NA	NA	NA	NA	NA	NA	NA	NA	NA	NA	NA	NA	NA	NA	NA	NA	NA	NA	4.8441	NA	NA	NA	NA	46.4794	NA	NA	NA	NA	NA	NA	-3.57601	NA
EBNA1BP2_P1P2	17.2008	NA	26.9495	NA	NA	NA	11.4057	NA	NA	NA	NA	49.5229	NA	NA	NA	NA	NA	NA	NA	NA	NA	NA	NA	NA	NA	NA	NA	NA	NA	NA	NA	NA	NA	NA	NA	NA	NA	NA	NA	NA	NA	NA	NA	NA	NA	NA	NA	NA	NA
NUP160_P1P2	43.3673	NA	61.1395	NA	39.5412	NA	32.8061	22.7568	NA	-7.85456	NA	26.0504	NA	NA	NA	NA	NA	NA	NA	NA	NA	NA	NA	NA	NA	NA	NA	NA	NA	NA	NA	NA	NA	NA	NA	14.6084	-5.65315	NA	NA	NA	75.3308	-6.16029	NA	NA	NA	NA	NA	NA	NA
CEP350_P1P2	17.314	NA	19.4886	NA	4.45467	NA	17.4611	NA	NA	7.67597	NA	19.9356	NA	NA	NA	NA	4.01739	NA	NA	NA	NA	NA	NA	NA	NA	NA	NA	NA	NA	NA	NA	NA	NA	NA	NA	NA	-0.161312	NA	NA	NA	NA	NA	NA	NA	NA	NA	NA	NA	24.7384
SAMD4B_P1P2	21.2812	NA	18.8754	NA	NA	NA	26.7092	NA	NA	NA	NA	45.255	NA	NA	NA	NA	NA	NA	NA	NA	NA	NA	NA	NA	NA	NA	NA	NA	NA	NA	NA	NA	NA	NA	NA	NA	NA	NA	NA	NA	NA	NA	NA	NA	NA	NA	NA	NA	NA
POLA2_P1P2	37.2089	NA	38.2716	3.25516	NA	NA	24.785	40.0271	NA	-5.14061	NA	25.8575	NA	NA	NA	NA	NA	NA	NA	NA	NA	NA	NA	NA	NA	NA	NA	NA	NA	NA	NA	NA	NA	NA	NA	6.06449	NA	NA	NA	NA	39.0702	NA	-5.61458	NA	NA	NA	NA	NA	NA
PLAGL2_P1P2	5.25498	2.10114	9.20594	NA	NA	9.8528	3.91901	NA	NA	NA	NA	2.59112	NA	-2.03825	NA	NA	NA	NA	2.14818	-14.5076	-11.6721	-20.5922	-14.4815	NA	NA	NA	4.45283	-27.9486	-25.1135	-34.8087	-19.1099	-3.57171	-20.8897	NA	NA	NA	NA	NA	NA	NA	NA	NA	NA	NA	NA	NA	NA	NA	NA
CKAP5_P1	22.8525	NA	38.232	NA	49.3358	11.6355	21.3449	10.9758	NA	-1.99889	NA	45.0144	NA	NA	NA	NA	NA	NA	NA	NA	NA	NA	NA	NA	NA	NA	NA	NA	NA	NA	NA	NA	NA	81.703	NA	8.8551	NA	NA	NA	NA	95.0141	NA	-6.53439	NA	NA	NA	NA	NA	NA
GTF2B_P1P2	30.2831	NA	64.0068	NA	NA	NA	32.6538	NA	NA	3.46339	NA	71.6246	-4.83943	-20.1973	NA	NA	NA	NA	41.1329	-53.1237	-43.4784	-9.47035	NA	-28.2449	-59.27	-46.4353	37.3217	-32.9335	-58.0309	-61.8814	-39.0064	-37.8407	-60.5113	NA	NA	NA	-7.0235	NA	NA	NA	NA	NA	NA	NA	NA	NA	NA	NA	NA
AARS_P1P2	76.5267	NA	110.917	19.7818	NA	NA	80.0058	31.0416	NA	-6.4896	NA	89.3701	NA	NA	NA	NA	NA	NA	NA	NA	NA	NA	NA	NA	NA	NA	NA	NA	NA	NA	NA	NA	NA	NA	NA	5.80741	-4.65448	NA	NA	NA	40.2065	NA	NA	NA	NA	NA	NA	NA	NA
ATP5SL_P1P2	9.90481	NA	NA	NA	NA	NA	NA	NA	NA	NA	NA	NA	NA	NA	NA	NA	NA	NA	NA	NA	NA	NA	NA	NA	NA	NA	NA	NA	NA	NA	NA	NA	NA	NA	NA	NA	NA	NA	NA	NA	NA	NA	NA	NA	NA	NA	-2.79014	-3.78849	NA
NOP10_P1P2	49.3434	-9.99368	71.0383	NA	-55.1877	-28.4337	55.7551	14.968	5.60771	13.0224	NA	91.3941	-22.238	-11.8284	NA	NA	NA	NA	44.5333	-50.3163	-35.5285	26.1892	7.71073	-17.5659	-41.9046	-41.0258	42.0219	-21.8193	-59.022	-65.6705	-49.1048	-35.7118	-55.9423	NA	NA	23.8023	-10.9236	NA	NA	NA	81.4898	NA	NA	NA	NA	NA	NA	NA	NA
SMG9_P1P2	3.97405	NA	NA	NA	NA	NA	NA	NA	NA	NA	NA	NA	NA	NA	NA	NA	NA	NA	NA	NA	NA	NA	NA	NA	NA	NA	NA	NA	NA	NA	NA	NA	NA	NA	NA	NA	NA	NA	NA	NA	NA	NA	NA	NA	NA	NA	NA	NA	-11.13
DHX8_P1P2	54.7085	NA	83.8488	NA	17.7304	NA	56.3875	NA	NA	-15.7621	NA	28.8359	NA	-14.6117	NA	NA	NA	NA	NA	NA	NA	NA	NA	NA	NA	NA	NA	NA	NA	NA	NA	NA	NA	NA	NA	NA	NA	NA	NA	NA	7.82261	NA	NA	NA	NA	NA	NA	NA	NA
OSBPL2_P1P2	5.26213	NA	NA	NA	NA	NA	NA	NA	NA	NA	NA	NA	NA	NA	NA	NA	NA	NA	NA	NA	NA	NA	NA	NA	NA	NA	NA	NA	NA	NA	NA	NA	NA	NA	NA	NA	NA	NA	NA	NA	NA	NA	NA	NA	NA	NA	-3.54635	NA	NA
TAL1_ENST00000294339.3	9.19865	NA	10.2285	18.0461	NA	6.49015	17.8802	-15.7117	NA	17.8538	NA	5.02241	NA	-2.38914	3.03164	NA	6.46657	NA	4.73919	-25.2269	-12.923	-3.89741	0.403323	-12.8197	-14.4703	-16.3788	5.32947	-24.4997	-25.8688	-32.8971	-28.3516	-38.5299	-25.8149	NA	NA	NA	NA	NA	NA	NA	NA	NA	NA	NA	NA	NA	NA	NA	NA
SAE1_P1P2	47.315	NA	100.446	NA	-10.9003	NA	87.7227	-6.57247	-5.3216	NA	NA	117.227	NA	NA	25.1188	NA	19.7012	NA	50.6277	-42.5099	-30.3503	NA	NA	-14.9306	-37.0305	-38.5124	55.5214	-32.7213	-68.1565	-42.787	-19.6964	NA	-51.5193	9.89521	NA	3.59502	NA	NA	NA	NA	NA	NA	NA	NA	NA	NA	NA	NA	NA
HSPE1-MOB4_P1P2	53.7888	NA	103.305	6.87097	NA	NA	49.0228	4.00833	NA	NA	NA	106.126	NA	-7.68226	NA	NA	NA	NA	NA	NA	NA	NA	NA	NA	NA	NA	NA	NA	NA	NA	NA	NA	NA	NA	NA	8.73941	-8.87748	NA	NA	NA	31.5521	NA	2.89628	NA	NA	NA	-3.47711	-14.6199	NA
HSPE1_P1P2	53.7888	NA	103.305	NA	NA	NA	49.0228	NA	NA	NA	NA	106.126	NA	-7.68226	NA	NA	NA	NA	NA	NA	NA	NA	NA	NA	NA	NA	NA	NA	NA	NA	NA	NA	NA	NA	NA	NA	NA	NA	NA	NA	NA	NA	NA	NA	NA	NA	-4.40171	-24.1367	NA
NOL11_P1P2	63.708	NA	90.3708	NA	-17.8742	NA	68.5976	NA	NA	13.7176	NA	79.7107	NA	NA	NA	NA	NA	NA	NA	NA	NA	NA	NA	NA	NA	NA	NA	NA	NA	NA	NA	NA	NA	11.1066	NA	7.83744	NA	NA	NA	NA	60.9431	NA	NA	NA	NA	NA	NA	NA	NA
APOOL_P1P2	9.65423	NA	15.4752	NA	-8.74051	-8.65306	4.44423	NA	NA	NA	NA	16.7613	-14.4777	-5.40035	4.81078	-5.12802	NA	NA	NA	NA	NA	NA	NA	NA	NA	NA	NA	NA	NA	NA	NA	NA	NA	NA	NA	NA	NA	NA	NA	NA	NA	NA	NA	NA	NA	NA	NA	NA	NA
TIMM22_P1P2	13.6054	NA	9.15389	NA	NA	NA	29.016	NA	NA	NA	NA	17.1749	NA	NA	NA	NA	NA	NA	NA	NA	NA	NA	NA	NA	NA	NA	NA	NA	NA	NA	NA	NA	NA	NA	NA	5.6289	NA	NA	NA	NA	NA	NA	NA	NA	NA	NA	-2.55195	-1.40786	NA
TUBA1B_P1P2	18.8018	NA	35.1318	NA	29.4502	NA	39.1105	11.0244	NA	NA	NA	28.9417	NA	-10.3814	NA	NA	NA	NA	24.0122	-15.6472	15.4366	-64.3562	18.3702	NA	-4.12541	-27.6762	25.3265	NA	26.1078	-30.9762	-54.7833	25.6853	-27.7814	NA	NA	3.57385	NA	NA	NA	NA	31.7718	NA	NA	NA	NA	NA	NA	NA	NA
POLR1A_P1P2	34.4613	NA	52.8444	NA	-4.38796	NA	27.0883	NA	NA	NA	NA	62.7991	NA	-1.99628	NA	NA	NA	NA	NA	NA	NA	NA	NA	NA	NA	NA	NA	NA	NA	NA	NA	NA	NA	NA	NA	NA	NA	NA	NA	NA	2.51494	NA	NA	NA	NA	NA	NA	NA	NA
HYPK_P1P2	28.2683	NA	36.891	18.8907	23.9121	-4.37621	32.3731	NA	NA	NA	NA	41.2332	NA	NA	6.34836	NA	4.77515	NA	25.2164	-58.4095	-47.5059	3.67219	-25.1968	-23.432	-54.7711	-40.0985	26.9812	-38.2265	-79.4823	-88.7332	-51.7881	-21.0309	-69.1726	NA	NA	11.7189	NA	NA	NA	NA	57.7642	NA	NA	NA	NA	NA	NA	NA	NA
DYNC1H1_P1P2	48.0269	NA	66.5164	NA	4.97512	NA	32.9529	26.7547	NA	NA	NA	57.2835	NA	-15.0667	NA	NA	NA	NA	NA	NA	NA	NA	NA	NA	NA	NA	NA	NA	NA	NA	NA	NA	NA	NA	NA	NA	NA	NA	NA	NA	NA	NA	NA	NA	NA	NA	NA	NA	NA
RPL26_P1P2	47.1784	NA	91.015	NA	-20.0813	NA	50.4579	9.78051	NA	NA	NA	114.394	NA	-10.8237	NA	NA	8.15662	NA	NA	NA	NA	NA	NA	NA	NA	NA	NA	NA	NA	NA	NA	NA	NA	10.5694	NA	2.67269	NA	NA	NA	NA	17.6038	NA	-5.20095	NA	NA	NA	NA	NA	NA
ZIC2_P1P2	6.66642	NA	16.2558	NA	NA	-6.06894	3.1444	NA	NA	3.52102	NA	6.47355	NA	-3.02523	NA	NA	NA	NA	8.57981	-25.3438	-39.0189	-12.8868	NA	-17.2067	-17.3661	NA	6.49765	-37.2734	-61.5376	-44.6758	-33.0254	NA	-28.6218	NA	NA	NA	NA	NA	NA	NA	NA	NA	NA	NA	NA	NA	NA	NA	-10.1729
SPC24_P1P2	31.8465	NA	64.7942	NA	52.0111	10.7505	24.7376	23.023	NA	-4.25243	NA	65.791	NA	NA	NA	NA	NA	NA	NA	NA	NA	NA	NA	NA	NA	NA	NA	NA	NA	NA	NA	NA	NA	83.7429	NA	16.085	NA	NA	NA	NA	99.3393	NA	NA	NA	NA	NA	NA	NA	NA
PKM_P1	18.8278	NA	24.7881	NA	NA	NA	54.903	-2.65662	NA	NA	NA	25.4184	NA	-15.8892	NA	NA	NA	NA	NA	NA	NA	NA	NA	NA	NA	NA	NA	NA	NA	NA	NA	NA	NA	NA	NA	NA	NA	NA	NA	NA	NA	NA	NA	NA	NA	NA	NA	NA	NA
TAL1_ENST00000371884.2	5.49253	1.80857	5.04737	NA	-5.42909	NA	12.4269	-6.44754	NA	NA	NA	4.40423	NA	NA	3.19897	NA	NA	NA	1.71641	-15.0597	-11.051	-23.0231	-5.00415	NA	NA	NA	3.8472	-14.2221	-15.5526	-17.389	-17.5161	-5.90592	-11.6739	NA	NA	NA	NA	NA	NA	NA	NA	NA	NA	NA	NA	NA	NA	NA	NA
ERCC2_P1P2	43.779	NA	66.4598	3.5873	NA	NA	45.402	NA	NA	NA	NA	89.3113	NA	NA	9.87486	NA	NA	NA	NA	NA	NA	NA	NA	NA	NA	NA	NA	NA	NA	NA	NA	NA	NA	NA	NA	NA	NA	NA	NA	NA	NA	NA	NA	NA	NA	NA	NA	NA	NA
IWS1_P1P2	20.9669	-19.8761	26.5435	-14.8113	-5.23573	-28.5639	42.7216	13.6799	NA	-18.1894	NA	20.7629	NA	-6.6728	5.22975	NA	5.62615	NA	20.6368	-55.1927	-44.7256	-20.9718	-19.9357	-20.2919	-49.2455	-49.0607	23.6509	-39.1751	-56.6597	-75.1459	-30.3021	-34.5262	-54.2863	NA	NA	NA	NA	NA	NA	NA	10.5877	NA	NA	NA	NA	NA	NA	NA	NA
MED21_P1P2	37.6225	NA	70.7748	NA	NA	11.0492	43.438	13.8506	4.04938	12.9703	NA	67.8139	NA	-18.0279	NA	NA	NA	NA	37.6744	-55.7932	-47.2855	-37.7534	-32.3059	-25.0263	-58.8295	-44.7677	39.9137	-21.0799	-88.9254	-76.0393	-58.0052	-46.8115	-73.6751	7.69142	-12.4259	6.15656	-7.97283	NA	NA	NA	NA	NA	NA	NA	NA	NA	NA	NA	NA
SNRNP70_P1P2	20.7838	9.79512	41.9377	NA	44.4111	31.1294	15.7935	8.88762	2.24437	NA	NA	43.9322	NA	-3.21714	NA	NA	NA	NA	29.6518	-33.7958	-30.775	NA	NA	-16.2001	-28.7358	-27.0024	30.2527	-12.9804	-54.108	-75.8308	-13.5465	-10.936	-35.9974	NA	NA	5.30063	NA	NA	NA	NA	NA	NA	NA	NA	NA	NA	NA	NA	NA
CHAF1B_P1P2	70.1377	NA	127.756	6.91897	-1.25577	-14.0805	79.7556	NA	NA	-51.9256	NA	122.881	NA	NA	NA	NA	NA	NA	53.8692	-66.2415	-31.4604	NA	NA	-24.6737	-74.8184	-49.511	58.2882	NA	-42.7122	-84.8492	-49.1405	-32.2446	-45.8054	91.2566	NA	11.6991	NA	NA	NA	NA	97.3943	NA	-23.1687	NA	NA	NA	NA	NA	NA
GAR1_P1P2	35.0306	NA	46.2252	NA	-36.2463	-13.2447	24.7628	19.1593	NA	NA	NA	46.1064	-3.2284	-2.01957	NA	NA	NA	NA	NA	NA	NA	NA	NA	NA	NA	NA	NA	NA	NA	NA	NA	NA	NA	NA	NA	5.44774	NA	NA	NA	NA	40.826	NA	NA	NA	NA	NA	NA	NA	NA
RPL23A_P1P2	52.0773	NA	50.7629	NA	NA	NA	49.4696	7.3261	NA	NA	NA	71.0214	NA	NA	NA	NA	NA	NA	NA	NA	NA	NA	NA	NA	NA	NA	NA	NA	NA	NA	NA	NA	NA	13.5812	NA	9.26963	NA	NA	NA	NA	69.15	NA	2.69716	NA	NA	NA	NA	NA	NA
IMPDH2_P1P2	39.3804	NA	82.9926	NA	-15.4588	-50.2684	44.0551	NA	NA	NA	NA	79.5321	-5.64861	-44.4819	NA	NA	NA	NA	41.4816	-56.6833	-65.884	-25.9673	-26.9181	-34.7942	-88.522	-65.0705	40.8454	-73.0477	-102.176	-133.374	-52.5107	-45.8354	-71.5437	15.5016	NA	NA	NA	NA	NA	NA	33.1999	NA	-13.3975	NA	NA	NA	NA	NA	NA
POLR3A_P1P2	32.619	-12.4384	51.7251	NA	NA	-15.4746	36.9771	NA	NA	-29.6555	NA	29.1084	-4.95405	-5.02692	NA	NA	NA	NA	33.0944	-41.8573	-34.2167	-22.8484	-16.3066	-21.4058	-46.4046	-43.6732	31.0163	-42.3651	-72.9561	-67.7824	-40.749	-20.4834	-63.991	NA	NA	NA	NA	NA	NA	NA	6.69609	NA	NA	NA	NA	NA	NA	NA	NA
UQCRB_P1P2	51.2608	-13.4686	61.8776	NA	NA	-11.4394	56.6728	NA	NA	NA	NA	66.0687	NA	-14.605	NA	NA	NA	NA	37.8822	-60.8555	-66.2122	-1.55996	-9.62447	-29.5902	-72.4768	-53.5189	34.2358	-52.9545	-74.5609	-54.5004	-73.1958	-59.0682	-48.9334	NA	NA	NA	NA	NA	NA	NA	10.0245	NA	NA	NA	NA	-13.9883	NA	-14.2641	NA
BOD1L1_P1	23.0376	NA	32.5186	NA	-2.80276	-11.4422	28.9246	31.41	NA	NA	NA	43.5598	NA	16.0694	4.36714	NA	NA	NA	NA	NA	NA	NA	NA	NA	NA	NA	NA	NA	NA	NA	NA	NA	NA	NA	NA	NA	NA	NA	NA	NA	11.2399	NA	NA	NA	NA	NA	NA	NA	NA
PSMC6_P1P2	24.7019	NA	45.7688	32.1797	57.9197	NA	31.3152	37.2765	NA	-2.73692	NA	44.8315	NA	-5.52397	NA	NA	NA	NA	NA	NA	NA	NA	NA	NA	NA	NA	NA	NA	NA	NA	NA	NA	NA	NA	NA	32.0816	-18.4379	NA	NA	NA	55.8996	NA	-4.14079	NA	NA	NA	NA	NA	NA
UTP15_P1P2	54.6822	NA	76.6964	NA	-16.6794	NA	26.4398	40.4011	NA	3.63721	NA	83.2546	NA	NA	NA	NA	6.90279	NA	NA	NA	NA	NA	NA	NA	NA	NA	NA	NA	NA	NA	NA	NA	NA	NA	NA	NA	NA	NA	NA	NA	7.13436	NA	NA	NA	NA	NA	NA	NA	NA
MRPL53_P1P2	19.0824	NA	28.9097	NA	15.21	-9.55793	27.0279	NA	NA	2.86054	NA	22.1003	NA	-9.11798	NA	NA	NA	NA	NA	NA	NA	NA	NA	NA	NA	NA	NA	NA	NA	NA	NA	NA	NA	NA	NA	NA	NA	NA	NA	NA	NA	NA	NA	NA	NA	NA	-5.67751	-17.3786	NA
DONSON_P1P2	46.3032	NA	49.5134	NA	9.7997	NA	30.9842	11.054	NA	NA	NA	59.0092	NA	13.2999	NA	NA	NA	NA	NA	NA	NA	NA	NA	NA	NA	NA	NA	NA	NA	NA	NA	NA	NA	NA	NA	5.69969	NA	NA	NA	NA	NA	NA	NA	NA	NA	NA	NA	NA	NA
PRMT5_P1	40.3484	NA	58.2892	-17.8132	9.82483	-19.278	26.5598	31.4318	NA	NA	NA	63.3261	-12.1223	NA	NA	NA	NA	NA	31.0697	-53.2941	-58.8077	24.9946	NA	-16.2847	-41.8144	-48.4189	35.7952	-29.5057	-64.846	-102.584	-5.98512	-60.6287	-54.744	NA	NA	NA	NA	NA	NA	NA	59.38	NA	NA	NA	NA	NA	NA	NA	NA
ATP5A1_P1	25.5362	NA	35.0401	NA	13.5469	NA	25.4183	NA	NA	1.76076	NA	42.1739	NA	-6.32374	8.68255	NA	NA	21.6642	NA	NA	NA	NA	NA	NA	NA	NA	NA	NA	NA	NA	NA	NA	NA	NA	-7.37738	NA	-4.05957	NA	NA	NA	NA	NA	NA	NA	NA	-3.77079	NA	-12.4132	NA
NDUFS2_P1P2	25.5632	-4.26933	22.1623	NA	NA	-9.8273	19.8196	NA	NA	3.30263	NA	41.5217	6.58596	-5.49273	NA	-6.02309	NA	NA	NA	NA	NA	NA	NA	NA	NA	NA	NA	NA	NA	NA	NA	NA	NA	NA	NA	NA	NA	NA	NA	NA	NA	NA	NA	NA	NA	-9.54397	NA	NA	NA
PIAS4_P1P2	22.2863	NA	53.0042	NA	NA	NA	30.0291	NA	NA	NA	NA	57.9564	NA	NA	NA	NA	NA	NA	NA	NA	NA	NA	NA	NA	NA	NA	NA	NA	NA	NA	NA	NA	NA	NA	NA	NA	NA	NA	NA	NA	NA	NA	NA	NA	NA	NA	NA	NA	NA
NCAPD2_P1P2	35.0009	NA	52.2722	NA	NA	NA	40.241	7.8553	NA	NA	NA	57.8726	NA	NA	NA	NA	NA	NA	NA	NA	NA	NA	NA	NA	NA	NA	NA	NA	NA	NA	NA	NA	NA	NA	NA	NA	NA	NA	NA	NA	NA	NA	NA	NA	NA	NA	NA	NA	NA
FANCG_P1P2	14.3615	NA	11.0294	NA	NA	5.00945	6.61634	NA	NA	NA	NA	6.5357	NA	5.19123	NA	NA	NA	NA	NA	NA	NA	NA	NA	NA	NA	NA	NA	NA	NA	NA	NA	NA	NA	NA	NA	NA	NA	NA	NA	NA	NA	NA	NA	NA	NA	NA	NA	NA	NA
CAMLG_P1P2	28.0359	-4.66717	40.1257	-4.85494	-4.75897	-27.688	35.7358	-4.51666	NA	5.27212	NA	52.1446	-24.0869	-10.137	NA	NA	NA	NA	NA	NA	NA	NA	NA	NA	NA	NA	NA	NA	NA	NA	NA	NA	NA	NA	NA	NA	NA	NA	NA	NA	NA	NA	19.3427	NA	NA	2.5734	NA	NA	NA
FDPS_P1P2	54.9352	NA	87.9486	NA	NA	NA	54.3269	NA	NA	-3.20911	NA	71.569	NA	-46.786	NA	NA	NA	NA	39.4541	-26.3326	-25.4708	25.2174	6.57693	-6.53626	-10.9542	-19.0954	42.3066	NA	-28.9979	-22.9964	NA	-42.0678	NA	NA	8.68074	NA	NA	NA	NA	NA	NA	NA	-9.61577	NA	NA	NA	NA	NA	36.1261
GUCY1B3_P1P2	8.95562	NA	NA	NA	NA	NA	NA	NA	NA	NA	NA	NA	NA	NA	NA	NA	NA	NA	NA	NA	NA	NA	NA	NA	NA	NA	NA	NA	NA	NA	NA	NA	NA	NA	NA	NA	NA	NA	NA	NA	NA	NA	NA	NA	NA	NA	NA	NA	NA
DPH1_P1	10.8116	NA	17.5282	-82.0305	30.5684	NA	4.62623	3.9577	NA	NA	NA	11.6288	NA	-3.20223	5.85789	NA	NA	NA	NA	NA	NA	NA	NA	NA	NA	NA	NA	NA	NA	NA	NA	NA	NA	4.77291	-10.6649	2.0209	NA	NA	NA	NA	7.1122	NA	NA	NA	NA	NA	NA	NA	NA
POLR2D_P1	48.9865	NA	66.0527	NA	29.0375	NA	29.1591	13.7898	NA	NA	NA	31.7011	NA	NA	NA	NA	NA	NA	37.8834	-27.7648	-8.48465	NA	NA	-5.78943	-7.15727	-8.28256	33.7806	NA	NA	NA	NA	NA	NA	NA	NA	17.0929	-17.1537	NA	NA	NA	29.0708	NA	NA	NA	NA	NA	NA	NA	NA
WDR33_P1P2	49.5443	NA	59.9798	NA	12.9076	0.0659137	34.0293	38.9149	NA	-3.01145	NA	56.2198	-10.6148	NA	NA	NA	NA	NA	NA	NA	NA	NA	NA	NA	NA	NA	NA	NA	NA	NA	NA	NA	NA	NA	NA	10.9685	NA	NA	NA	NA	NA	NA	NA	NA	NA	NA	NA	NA	NA
SLC1A5_P1	8.30163	-10.7517	18.9069	NA	-6.72523	-15.2388	NA	NA	NA	NA	NA	11.7518	-8.82101	-8.11854	NA	NA	NA	NA	11.9733	-36.8331	-28.6926	-40.1212	-25.2009	-20.4718	-39.3322	-13.9232	6.84988	-31.2613	-26.0572	-51.9365	-19.4176	-15.6266	-27.837	NA	NA	NA	NA	NA	NA	NA	NA	NA	NA	NA	NA	NA	NA	NA	NA
SKA3_P1P2	32.6486	-12.3674	42.0898	NA	37.233	NA	46.1277	47.1297	NA	NA	NA	49.2137	NA	-22.3041	NA	NA	8.27335	NA	25.8472	-48.0604	16.3758	30.4908	23.3126	NA	-0.316532	-19.044	27.8799	-40.9251	72.6157	-69.9596	-8.59915	-26.5262	-13.6308	10.0967	NA	NA	NA	NA	NA	NA	22.6551	NA	NA	NA	NA	NA	NA	NA	NA
DDX24_P1P2	65.8929	NA	108.138	NA	-24.9415	-7.33928	55.9319	13.5399	NA	NA	NA	91.0881	NA	-47.8779	NA	NA	NA	NA	NA	NA	NA	NA	NA	NA	NA	NA	NA	NA	NA	NA	NA	NA	NA	NA	NA	4.01926	NA	NA	NA	NA	12.2984	-8.46466	NA	NA	NA	NA	NA	NA	NA
NUDC_P1P2	44.9658	-8.56777	50.7694	NA	NA	-27.8315	58.9853	47.9252	NA	2.65408	NA	72.1123	-4.53677	NA	NA	NA	NA	NA	NA	NA	NA	NA	NA	NA	NA	NA	NA	NA	NA	NA	NA	NA	NA	NA	NA	8.02243	-11.6234	NA	NA	NA	42.2268	NA	NA	NA	NA	NA	NA	NA	15.5287
RABGGTB_P1P2	42.3194	NA	48.6685	NA	NA	NA	37.7913	8.62155	NA	NA	NA	58.3091	NA	-1.65747	NA	NA	NA	NA	NA	NA	NA	NA	NA	NA	NA	NA	NA	NA	NA	NA	NA	NA	NA	NA	NA	10.4665	-11.4962	NA	NA	NA	33.8717	-4.87847	NA	NA	NA	NA	NA	NA	NA
DDX27_P1P2	50.3951	NA	71.029	NA	-37.1896	-17.8993	37.0043	31.081	NA	1.3992	NA	60.1655	NA	NA	NA	NA	NA	NA	NA	NA	NA	NA	NA	NA	NA	NA	NA	NA	NA	NA	NA	NA	NA	NA	NA	8.30009	NA	NA	NA	NA	24.128	NA	NA	NA	NA	NA	NA	NA	NA
POLR1C_P1	23.1497	NA	48.6223	NA	-4.95597	NA	20.5982	NA	NA	NA	NA	47.6993	NA	NA	NA	NA	NA	NA	NA	NA	NA	NA	NA	NA	NA	NA	NA	NA	NA	NA	NA	NA	NA	NA	-11.0734	8.65385	NA	NA	NA	NA	4.85954	NA	NA	NA	NA	NA	NA	NA	NA
UBAP2L_P1P2	9.86639	NA	16.5301	-13.2503	-26.7068	3.10045	15.2239	-3.14668	NA	NA	NA	10.4768	5.30026	-14.2983	NA	NA	NA	NA	NA	NA	NA	NA	NA	NA	NA	NA	NA	NA	NA	NA	NA	NA	NA	NA	NA	NA	NA	NA	NA	NA	3.12245	NA	-10.8502	NA	NA	NA	2.92148	3.79433	NA
KRR1_P1P2	34.1855	NA	62.7103	NA	NA	-5.78309	34.8953	30.9193	NA	NA	NA	57.3391	NA	-1.90559	NA	NA	NA	NA	NA	NA	NA	NA	NA	NA	NA	NA	NA	NA	NA	NA	NA	NA	NA	NA	NA	6.2341	NA	NA	NA	NA	57.3039	NA	NA	NA	NA	NA	NA	NA	NA
TFRC_P1P2	20.5458	NA	28.6531	NA	20.9137	4.17823	23.271	NA	NA	NA	NA	16.936	NA	NA	NA	NA	NA	NA	NA	NA	NA	NA	NA	NA	NA	NA	NA	NA	NA	NA	NA	NA	NA	15.2692	NA	NA	NA	NA	NA	NA	15.0435	NA	NA	NA	NA	NA	NA	NA	8.95568
PTCD1_P2	44.7733	-13.4324	68.661	4.90302	5.84576	-45.2726	60.3023	NA	NA	20.7006	NA	69.655	-5.20972	-8.93847	NA	NA	NA	NA	34.6475	-87.7959	-58.5775	1.0031	-7.31179	-31.8553	-88.97	-54.3993	38.7889	-69.5498	-80.9284	-104.57	-79.5075	-45.4507	-72.2986	11.6746	-13.0547	NA	-9.79848	NA	NA	NA	6.85786	NA	NA	NA	NA	NA	-18.3235	-27.7484	NA
ATP5J2-PTCD1_P2	44.7733	-13.4324	68.661	7.30869	5.84576	-45.2726	60.3023	NA	NA	21.5426	NA	69.655	-5.20972	-8.93847	NA	NA	NA	NA	34.4263	-87.7959	-57.2852	0.499142	-6.90598	-32.1093	-88.3727	-53.7094	37.7322	-69.5498	-80.9284	-104.57	-81.2492	-45.989	-72.2986	7.80514	-9.59202	NA	-9.79848	NA	NA	NA	9.49738	NA	NA	NA	NA	NA	NA	NA	NA
PRPF6_P1P2	23.732	NA	42.7518	NA	17.8438	NA	23.914	21.4067	NA	NA	NA	52.3384	NA	NA	NA	NA	NA	NA	NA	NA	NA	NA	NA	NA	NA	NA	NA	NA	NA	NA	NA	NA	NA	7.38482	NA	26.9728	NA	NA	NA	NA	66.3147	NA	NA	NA	NA	NA	NA	NA	NA
MRPL55_P1P2	37.6088	-0.144366	49.9034	NA	NA	-15.4744	28.3684	NA	NA	5.71892	NA	69.5733	NA	-10.5359	NA	NA	NA	NA	40.7419	-74.8174	-56.1155	0.365538	0.0994673	-33.0407	-84.7729	-54.2606	36.7006	-51.1941	-37.0329	-74.4565	-26.4454	-12.0727	-34.2749	NA	NA	NA	-5.06812	NA	NA	NA	NA	NA	NA	NA	NA	NA	-9.50296	-17.7967	NA
EIF3E_P1P2	53.8482	NA	89.8909	NA	9.91689	NA	26.3849	20.8629	NA	NA	NA	62.4159	NA	NA	9.72921	NA	NA	NA	NA	NA	NA	NA	NA	NA	NA	NA	NA	NA	NA	NA	NA	NA	NA	NA	NA	17.8713	-9.9253	NA	NA	NA	28.3135	NA	NA	NA	NA	NA	NA	NA	NA
COPZ1_P1	44.8813	NA	76.8793	NA	34.2246	28.3094	39.2172	7.5984	NA	-5.72312	NA	80.8419	NA	-2.11814	NA	NA	NA	NA	NA	NA	NA	NA	NA	NA	NA	NA	NA	NA	NA	NA	NA	NA	NA	NA	NA	19.7535	-6.28631	NA	NA	NA	72.0934	NA	11.0073	NA	NA	NA	NA	NA	NA
BNIP1_P1P2	42.8734	13.2196	54.2185	6.63398	25.0075	24.4656	27.7143	NA	NA	NA	NA	59.8922	4.56068	NA	NA	NA	NA	NA	NA	NA	NA	NA	NA	NA	NA	NA	NA	NA	NA	NA	NA	NA	NA	NA	NA	11.9527	-8.67586	NA	NA	NA	10.9964	NA	NA	NA	NA	NA	NA	NA	NA
FAM96B_P1P2	21.5047	NA	20.2947	NA	NA	NA	32.1216	NA	NA	NA	NA	20.437	NA	NA	NA	NA	NA	NA	NA	NA	NA	NA	NA	NA	NA	NA	NA	NA	NA	NA	NA	NA	NA	NA	NA	NA	NA	NA	NA	NA	NA	NA	NA	NA	NA	NA	NA	NA	NA
METTL17_P1P2	38.6582	-18.8016	65.8277	3.78832	NA	-29.2179	61.2264	NA	NA	4.37184	NA	75.5419	NA	-16.3494	NA	NA	NA	NA	37.118	-70.3535	-36.6397	-20.7809	-2.67974	-28.2464	-84.3269	-40.0871	31.4223	-33.4111	-53.3628	-71.4144	-58.5437	-35.9932	-44.5933	NA	NA	NA	NA	NA	NA	NA	9.2117	NA	NA	NA	NA	NA	-6.40884	-19.4946	NA
TTC27_P1P2	68.3168	NA	90.2312	NA	NA	NA	58.0774	NA	NA	NA	NA	104.021	NA	NA	NA	NA	NA	NA	NA	NA	NA	NA	NA	NA	NA	NA	NA	NA	NA	NA	NA	NA	NA	11.6668	-12.2768	7.62959	NA	NA	NA	NA	121.199	NA	NA	NA	NA	NA	NA	NA	NA
RPL5_P1P2	41.5382	NA	55.7805	NA	13.1791	17.9808	25.5812	19.4065	NA	NA	NA	48.407	NA	NA	NA	NA	NA	NA	NA	NA	NA	NA	NA	NA	NA	NA	NA	NA	NA	NA	NA	NA	NA	NA	NA	16.4306	NA	NA	NA	NA	15.9307	NA	NA	NA	NA	NA	NA	NA	NA
ELAC2_P1P2	22.878	NA	27.4564	NA	NA	-14.303	32.3468	NA	NA	NA	NA	23.2213	-2.82491	-7.14262	5.25458	-4.78117	NA	NA	NA	NA	NA	NA	NA	NA	NA	NA	NA	NA	NA	NA	NA	NA	NA	NA	NA	NA	NA	NA	NA	NA	NA	NA	NA	NA	NA	NA	NA	NA	NA
SKA1_P1P2	18.7711	NA	26.3569	NA	45.7456	NA	17.401	52.7448	NA	-6.95136	NA	12.4709	NA	-5.16707	5.40963	NA	NA	NA	9.0697	NA	55.4576	71.56	60.0133	NA	47.2083	-0.577949	9.80769	NA	135.257	-39.6197	29.4673	NA	13.0044	44.1302	NA	9.17776	NA	NA	NA	NA	51.3238	NA	NA	NA	NA	NA	NA	NA	NA
PRPF3_P1P2	61.691	NA	92.2346	NA	16.2333	NA	64.8937	NA	NA	NA	NA	65.9805	NA	NA	NA	NA	NA	NA	NA	NA	NA	NA	NA	NA	NA	NA	NA	NA	NA	NA	NA	NA	NA	11.268	NA	10.455	NA	NA	NA	NA	64.6003	NA	NA	NA	NA	NA	NA	NA	NA
COG3_P1P2	37.2055	NA	66.2073	-24.3595	12.5746	-6.84737	42.2337	NA	NA	NA	NA	72.4422	-21.865	-15.7201	NA	NA	NA	NA	NA	NA	NA	NA	NA	NA	NA	NA	NA	NA	NA	NA	NA	NA	NA	NA	NA	-2.97841	NA	NA	NA	NA	NA	NA	NA	NA	NA	NA	NA	NA	NA
XPO1_P1P2	32.6448	NA	38.1624	NA	NA	3.59309	24.5768	NA	NA	NA	NA	21.7657	NA	-9.07528	NA	NA	NA	NA	29.6756	-57.2046	-36.6715	-45.9127	-18.6781	-26.2064	-60.2687	-46.0806	31.2706	-44.6237	-69.6887	-67.2494	-49.0631	-38.2359	-44.7668	NA	NA	NA	NA	NA	NA	NA	NA	NA	NA	NA	NA	NA	-9.33091	NA	NA
TXNL4A_P1P2	25.6745	NA	40.2527	NA	NA	-3.77105	23.2156	NA	NA	NA	NA	24.6141	-23.7049	-8.12712	NA	NA	NA	NA	NA	NA	NA	NA	NA	NA	NA	NA	NA	NA	NA	NA	NA	NA	NA	NA	NA	NA	NA	NA	NA	NA	NA	NA	NA	NA	NA	NA	NA	NA	NA
SMN2_ENST00000380743.4	60.314	NA	60.7203	NA	17.6108	NA	41.9738	5.19409	NA	-4.61402	NA	72.2778	NA	-9.59341	NA	NA	NA	NA	NA	NA	NA	NA	NA	NA	NA	NA	NA	NA	NA	NA	NA	NA	NA	NA	NA	8.89276	NA	NA	NA	NA	33.1865	NA	NA	NA	NA	NA	NA	NA	NA
POP5_P1P2	39.8115	NA	67.8258	3.14212	NA	NA	38.8262	16.8355	NA	-9.94284	NA	78.7972	NA	NA	NA	NA	NA	NA	NA	NA	NA	NA	NA	NA	NA	NA	NA	NA	NA	NA	NA	NA	NA	5.70356	-7.98733	12.6583	-9.78951	NA	NA	NA	88.5719	NA	NA	NA	NA	NA	NA	NA	NA
ELP4_P1P2	43.6611	NA	57.1417	NA	-10.7815	NA	52.7012	NA	NA	-7.67657	NA	63.914	-31.4516	NA	NA	NA	15.8609	NA	32.263	-60.9898	-43.0591	25.9928	16.6384	-20.7511	-44.2266	-38.1444	27.8804	-56.0045	-31.0866	-91.9644	3.5585	-21.7784	-36.5661	NA	19.1062	6.20383	NA	NA	NA	NA	NA	NA	NA	NA	NA	NA	NA	NA	NA
MRP63_P1P2	48.5063	-11.0586	64.7562	NA	NA	-26.8584	59.2018	NA	NA	5.29551	NA	69.1912	NA	-8.86951	13.2894	NA	6.30558	NA	38.5637	-66.8039	-52.1546	-1.71612	-6.65079	-29.5442	-84.4461	-54.033	35.5535	-35.2892	-49.0553	-55.6306	-59.6617	-37.8952	-54.1868	NA	NA	NA	-2.22491	NA	NA	NA	NA	NA	NA	NA	NA	NA	-8.35176	-8.65617	NA
COPS2_P1P2	17.917	-6.59851	35.9433	6.19757	NA	-20.8471	24.9835	55.5353	NA	NA	NA	42.8707	-5.30047	-2.34447	4.66899	NA	NA	NA	NA	NA	NA	NA	NA	NA	NA	NA	NA	NA	NA	NA	NA	NA	NA	NA	NA	NA	-3.21276	NA	NA	NA	NA	-5.39624	NA	NA	NA	NA	NA	NA	NA
TBCD_P1P2	42.1246	NA	79.121	NA	NA	-6.94799	51.3848	NA	NA	NA	NA	62.9069	NA	-28.3073	NA	NA	6.31843	NA	NA	NA	NA	NA	NA	NA	NA	NA	NA	NA	NA	NA	NA	NA	NA	NA	NA	NA	NA	NA	NA	NA	NA	NA	NA	NA	NA	NA	NA	-14.7468	NA
POLR1E_P1P2	42.3742	-15.5033	53.1122	NA	-43.3516	-29.0142	54.7451	NA	NA	15.4236	NA	64.2635	NA	-0.977396	NA	NA	NA	NA	NA	NA	NA	NA	NA	NA	NA	NA	NA	NA	NA	NA	NA	NA	NA	NA	NA	7.84126	-8.74945	NA	NA	NA	34.4265	NA	NA	NA	NA	NA	NA	NA	NA
INTS4_P1P2	44.6602	NA	92.1804	22.7681	NA	NA	49.832	7.74034	NA	NA	NA	73.9632	NA	-4.12905	NA	NA	NA	NA	NA	NA	NA	NA	NA	NA	NA	NA	NA	NA	NA	NA	NA	NA	NA	18.4736	NA	-0.966181	NA	NA	NA	NA	78.8892	NA	1.70322	NA	NA	NA	NA	NA	NA
WDR89_P1P2	8.50116	NA	18.2362	NA	-17.6215	NA	7.6174	NA	NA	1.43258	NA	10.817	-1.71929	NA	NA	NA	NA	NA	NA	NA	NA	NA	NA	NA	NA	NA	NA	NA	NA	NA	NA	NA	NA	NA	NA	1.91976	NA	NA	NA	NA	NA	NA	NA	NA	NA	NA	NA	NA	NA
SF3B1_P1P2	16.3816	NA	27.759	NA	16.3583	NA	20.0767	7.67867	NA	NA	NA	17.7037	NA	NA	NA	NA	NA	NA	NA	NA	NA	NA	NA	NA	NA	NA	NA	NA	NA	NA	NA	NA	NA	NA	NA	4.69856	NA	NA	NA	NA	5.79705	-1.07905	NA	NA	NA	NA	-11.0211	NA	NA
GAB2_P1P2	39.8077	7.80403	42.1983	NA	NA	38.3942	34.4558	NA	NA	NA	NA	29.7839	10.1174	-16.4661	NA	NA	5.04519	NA	38.5365	-62.6709	-68.3695	-61.6148	-48.1208	-37.6853	-99.52	-82.047	35.9216	-55.1422	-125.582	-100.214	-63.5763	-72.7492	-88.0537	NA	NA	NA	NA	NA	NA	NA	NA	NA	NA	NA	NA	NA	NA	NA	NA
DNAJC19_P1P2	58.4069	NA	136.694	12.3454	NA	-17.6572	50.0083	18.2639	6.44751	2.96202	NA	86.0091	-5.03434	-57.366	NA	NA	NA	NA	NA	NA	NA	NA	NA	NA	NA	NA	NA	NA	NA	NA	NA	NA	NA	NA	NA	NA	NA	NA	NA	NA	NA	NA	NA	NA	NA	NA	NA	NA	NA
EEF2_P1	41.1825	NA	61.5943	NA	29.3624	NA	34.5726	7.51584	NA	NA	NA	66.6359	NA	NA	NA	NA	NA	NA	NA	NA	NA	NA	NA	NA	NA	NA	NA	NA	NA	NA	NA	NA	NA	NA	-5.83937	11.4637	NA	NA	NA	NA	6.99669	NA	NA	NA	NA	NA	NA	NA	NA
RPL3_P1P2	23.4284	NA	40.7666	NA	-6.88177	7.04043	22.2278	13.5948	NA	NA	NA	19.2675	NA	NA	NA	NA	NA	NA	NA	NA	NA	NA	NA	NA	NA	NA	NA	NA	NA	NA	NA	NA	NA	NA	NA	8.51358	NA	NA	NA	NA	NA	NA	NA	NA	NA	NA	NA	NA	NA
RBMX_P1P2	44.3425	NA	73.3031	NA	23.482	4.9566	55.5972	NA	NA	-10.3514	NA	64.2265	NA	NA	NA	NA	NA	NA	NA	NA	NA	NA	NA	NA	NA	NA	NA	NA	NA	NA	NA	NA	NA	29.1712	NA	10.9554	NA	NA	NA	NA	40.7866	NA	NA	NA	NA	NA	NA	NA	NA
ACTL6A_P1P2	32.6467	-6.87167	43.5708	NA	12.4441	-19.0041	27.838	13.675	6.93549	-15.3132	NA	20.9533	NA	NA	NA	NA	NA	NA	NA	NA	NA	NA	NA	NA	NA	NA	NA	NA	NA	NA	NA	NA	NA	NA	NA	NA	NA	NA	NA	NA	NA	NA	1.95008	NA	NA	NA	-10.2396	NA	NA
SEC22B_P1P2	35.5051	32.7372	53.3486	NA	NA	39.5173	40.0859	-3.45282	NA	NA	NA	63.8139	NA	-29.5413	9.29131	NA	NA	NA	NA	NA	NA	NA	NA	NA	NA	NA	NA	NA	NA	NA	NA	NA	NA	NA	NA	NA	-2.76949	NA	NA	NA	NA	NA	NA	NA	NA	NA	NA	NA	NA
GFER_P1P2	29.4974	NA	48.0397	NA	NA	NA	28.0291	6.66683	NA	2.13147	NA	50.9568	-3.05725	NA	NA	NA	NA	NA	NA	NA	NA	NA	NA	NA	NA	NA	NA	NA	NA	NA	NA	NA	NA	NA	NA	8.50504	-10.2249	NA	NA	NA	87.3078	NA	NA	NA	NA	NA	NA	-7.47135	NA
UBA3_P1P2	45.758	-8.21886	58.9601	11.7456	-3.702	-21.8688	45.9061	NA	NA	NA	NA	89.7294	NA	NA	10.2228	-7.88741	5.75333	NA	NA	NA	NA	NA	NA	NA	NA	NA	NA	NA	NA	NA	NA	NA	NA	NA	-8.29348	NA	NA	NA	NA	NA	23.8261	-13.2301	NA	NA	NA	NA	NA	NA	NA
RBBP4_P1P2	32.2316	-12.8236	47.7548	8.84367	NA	-24.3132	37.4433	NA	NA	NA	NA	27.1247	-4.89565	NA	6.11603	NA	NA	NA	NA	NA	NA	NA	NA	NA	NA	NA	NA	NA	NA	NA	NA	NA	NA	NA	NA	NA	NA	NA	NA	NA	NA	NA	-7.92724	NA	NA	NA	NA	NA	NA
GPKOW_P1P2	20.9703	NA	22.1283	NA	29.7965	NA	22.9603	NA	NA	NA	NA	17.8125	NA	-4.67197	NA	NA	7.24783	NA	NA	NA	NA	NA	NA	NA	NA	NA	NA	NA	NA	NA	NA	NA	NA	NA	NA	25.8268	NA	NA	NA	NA	NA	NA	NA	NA	NA	NA	NA	NA	NA
GINS4_P1P2	25.552	NA	45.6992	NA	NA	5.75802	27.2397	22.4548	NA	-13.6536	NA	43.0449	8.72784	NA	NA	NA	NA	NA	32.6852	-42.3596	-49.1538	-34.1034	-46.777	-18.2542	-51.1884	-48.3283	31.8955	NA	-56.2957	-67.9048	-64.7216	-31.7752	-56.012	NA	NA	11.1644	-3.72559	NA	NA	NA	25.8368	NA	NA	NA	NA	NA	NA	NA	NA
MFN2_P1	11.0499	NA	NA	NA	NA	NA	NA	NA	NA	NA	NA	NA	NA	NA	NA	NA	NA	NA	NA	NA	NA	NA	NA	NA	NA	NA	NA	NA	NA	NA	NA	NA	NA	NA	NA	NA	NA	NA	NA	NA	NA	NA	NA	NA	NA	NA	NA	NA	NA
GNL3L_P1P2	30.7355	NA	38.8913	NA	-37.4875	-14.7449	35.3966	NA	NA	NA	NA	37.5279	-13.9877	NA	NA	NA	NA	NA	NA	NA	NA	NA	NA	NA	NA	NA	NA	NA	NA	NA	NA	NA	NA	NA	NA	8.9218	NA	NA	NA	NA	50.9311	NA	NA	NA	NA	NA	NA	NA	NA
MTHFD1_P1P2	61.8615	NA	108.523	NA	NA	-51.4046	63.5971	NA	NA	3.66196	NA	100.282	NA	-28.1875	NA	NA	NA	NA	48.628	-116.226	-88.511	-41.1586	-24.0739	-42.6601	-120.98	-79.7484	49.8349	-16.4703	-53.7391	-88.1227	-81.3455	-76.2585	-83.6314	8.78505	NA	NA	NA	NA	NA	NA	27.5417	NA	NA	NA	NA	NA	NA	NA	NA
[truncated: 10,396 more rows]
[truncated: 117 more columns]

## Sheet: sgRNA z-scores
	ATF6_inhibitor_sensitivity.gamma	ATF6_inhibitor_sensitivity.rho.treated	CRISPRi_v2_test_screens.gamma	CRISPRi_v2_test_screens.rho.treated_CTx-DTA	CRISPRi_v2_test_screens.rho.treated_HHT	CRISPRi_v2_test_screens.rho.treated_Tm	CSN5i_sensitivity.gamma	CSN5i_sensitivity.rho.treated	ERSE_tunicamycin_FACS.epsilon	RQC_reporter_FACS.epsilon	UPR_reporter_FACS.epsilon	allelic_series_growth_screen_and_sensitivity.gamma	allelic_series_growth_screen_and_sensitivity.rho.treated_imatinib	allelic_series_growth_screen_and_sensitivity.rho.treated_topotecan	antimycin_sensitivity.gamma	antimycin_sensitivity.rho.treated	oligomycin_sensitivity.gamma	oligomycin_sensitivity.rho.treated	rigosertib_sensitivity_sublibrary.gamma	rigosertib_sensitivity_sublibrary.rho.treated_abt	rigosertib_sensitivity_sublibrary.rho.treated_bi	rigosertib_sensitivity_sublibrary.rho.treated_col	rigosertib_sensitivity_sublibrary.rho.treated_maytan	rigosertib_sensitivity_sublibrary.rho.treated_rigo	rigosertib_sensitivity_sublibrary.rho.treated_rio	rigosertib_sensitivity_sublibrary.rho.treated_vin	rigosertib_sensitivity_sublibrary_part2.gamma	rigosertib_sensitivity_sublibrary_part2.rho.treated_Alisertib	rigosertib_sensitivity_sublibrary_part2.rho.treated_BI2536	rigosertib_sensitivity_sublibrary_part2.rho.treated_Blebbistatin	rigosertib_sensitivity_sublibrary_part2.rho.treated_Rigosertib	rigosertib_sensitivity_sublibrary_part2.rho.treated_STLC	rigosertib_sensitivity_sublibrary_part2.rho.treated_Vinblastine	H358_drug_sensitivity.gamma	H358_drug_sensitivity.rho.treated	HFF_CMV_sensitivity.gamma	HFF_CMV_sensitivity.rho.treated	Wells_lab_Ras_mutant_EV.gamma	Wells_lab_Ras_mutant_KM.gamma	Wells_lab_Ras_mutant_KP.gamma	miapaca_drug_sensitivity.gamma	miapaca_drug_sensitivity.rho.treated	BCMA_GW	Chap5d	counts	H1_Custom	H1_H3_H4dualreporter_Dox_mApple	H1_H3_H4dualreporter_Un_mApple	H2_Custom
[truncated: 89,272 more rows]
[truncated: 117 more columns]
