# Supplementary material for: Maximizing CRISPRi efficacy and accessibility with dual-sgRNA libraries and optimal effectors
Source: eLife. 2022 Dec 28;11:e81856. doi: 10.7554/eLife.81856 (PMC9829409; doi:10.7554/eLife.81856)
Supplement: Supplementary file 4. [file elife-81856-supp4.xlsx]

## Sheet: library 1+2
gene	transcript	gene_source	sgID_A	protospacer_A	phenotype_A	predictedRank_A	source_A	sgID_B	protospacer_B	phenotype_B	predictedRank_B	source_B	sgID_AB
BIRC7	P1P2	nonessential	BIRC7_+_61867189.23-P1P2	GTGTCACGGGGCCCCTGGCA	1	1	predicted	BIRC7_+_61867275.23-P1P2	GCTGGGAGGGGAGTATCCCA	2	2	predicted	BIRC7_+_61867189.23-P1P2|BIRC7_+_61867275.23-P1P2
EIF2S1	P1P2	essential	EIF2S1_-_67827085.23-P1P2	GAGCGCACGCTGAGGAGGAT	1	1	essential	EIF2S1_-_67827080.23-P1P2	GAGCGAAGCGCACGCTGAGG	2	4	essential	EIF2S1_-_67827085.23-P1P2|EIF2S1_-_67827080.23-P1P2
KRTAP4-11	P1P2	nonessential	KRTAP4-11_-_39274603.23-P1P2	GAGGATCTAGTTGGGTTTCT	1	1	predicted	KRTAP4-11_-_39274637.23-P1P2	GTTGTGTTTGGAAGTCTCCT	2	2	predicted	KRTAP4-11_-_39274603.23-P1P2|KRTAP4-11_-_39274637.23-P1P2
RNF207	P1	nonessential	RNF207_-_6266251.23-P1	GTCCAGGGCCGGCTACTCCT	1	1	predicted	RNF207_-_6266202.23-P1	GGGGAGGCCCCGCGCAGAGT	2	2	predicted	RNF207_-_6266251.23-P1|RNF207_-_6266202.23-P1
C19orf73	P1P2	nonessential	C19orf73_+_49622295.23-P1P2	GCGCGCCGCACGGGACACGA	1	1	predicted	C19orf73_-_49622341.23-P1P2	GGCTAGTGCGCGCCACTGCC	2	2	predicted	C19orf73_+_49622295.23-P1P2|C19orf73_-_49622341.23-P1P2
ICAM3	P1P2	nonessential	ICAM3_+_10450277.23-P1P2	GTCTGTCAGAATGGCCACCA	1	1	predicted	ICAM3_-_10450282.23-P1P2	GCACAACACGGATGGTACCA	2	2	predicted	ICAM3_+_10450277.23-P1P2|ICAM3_-_10450282.23-P1P2
ZBTB5	P1P2	significant	ZBTB5_-_37465014.23-P1P2	GGCCTGGCGTCGGGACACCG	1	4	empirical	ZBTB5_-_37465419.23-P1P2	GCAGCACTCTGAGAACACGG	1	1	predicted	ZBTB5_-_37465014.23-P1P2|ZBTB5_-_37465419.23-P1P2
LIMS3L	ENST00000413601.2	nonessential	LIMS3L_-_111230360.23-ENST00000413601.2	GGGCCTGAGAAGGCCATCGT	1	1	predicted	LIMS3L_-_111230331.23-ENST00000413601.2	GGTTCTCTGGGATAATGCAG	2	2	predicted	LIMS3L_-_111230360.23-ENST00000413601.2|LIMS3L_-_111230331.23-ENST00000413601.2
SMYD5	P1P2	nonessential	SMYD5_+_73441741.23-P1P2	GGCCCCGAGCAGCCACAGAA	1	1	predicted	SMYD5_+_73441401.23-P1P2	GGAGAACACGTCGCACATGG	2	2	predicted	SMYD5_+_73441741.23-P1P2|SMYD5_+_73441401.23-P1P2
UBN1	P1P2	nonessential	UBN1_+_4897489.23-P1P2	GGTCACGAGCCGAAGGGAGG	1	1	predicted	UBN1_-_4897536.23-P1P2	GAAGCGCCCGCGGTCTGAGG	2	2	predicted	UBN1_+_4897489.23-P1P2|UBN1_-_4897536.23-P1P2
DCP2	P1P2	significant	DCP2_+_112312884.23-P1P2	GGGTGTTCTGCGGGGAAGGA	1	6	empirical	DCP2_+_112312862.23-P1P2	GAGGGCCTTGAGAAACAGGG	2	5	empirical	DCP2_+_112312884.23-P1P2|DCP2_+_112312862.23-P1P2
ICT1	P1P2	essential	ICT1_-_73008809.23-P1P2	GCCACCAGGTGCCTGCGCTG	1	7	essential	ICT1_-_73008787.23-P1P2	GTCGCAAGACCTGAGCATGG	2	5	essential	ICT1_-_73008809.23-P1P2|ICT1_-_73008787.23-P1P2
NDUFB3	P1P2	nonessential	NDUFB3_-_201936802.23-P1P2	GGGTAAATTAGGGAGTTGGT	1	1	predicted	NDUFB3_-_201936782.23-P1P2	GGAGAGGTCAGATTGCTGTC	2	2	predicted	NDUFB3_-_201936802.23-P1P2|NDUFB3_-_201936782.23-P1P2
USP41	P1P2	nonessential	USP41_-_20726965.23-P1P2	Gctagctctgggagcagaca	1	1	predicted	USP41_-_20726954.23-P1P2	Gtgctgggtcacctagctct	2	2	predicted	USP41_-_20726965.23-P1P2|USP41_-_20726954.23-P1P2
NXPH2	P1P2	nonessential	NXPH2_+_139537919.23-P1P2	GCAGCGCTCGGATTCCGGGA	1	1	predicted	NXPH2_-_139537902.23-P1P2	GGGCAGGACTGAGGACGCCA	2	2	predicted	NXPH2_+_139537919.23-P1P2|NXPH2_-_139537902.23-P1P2
ALKBH8	P1P2	significant	ALKBH8_+_107436405.23-P1P2	GGGCGTGCAAGTATCCGCTG	1	5	empirical	ALKBH8_+_107436425.23-P1P2	GTGGCCGCGCCCAGGGGAGA	2	6	empirical	ALKBH8_+_107436405.23-P1P2|ALKBH8_+_107436425.23-P1P2
REG3G	P1P2	nonessential	REG3G_+_79252881.23-P1P2	GTTACCTCTCTGGTGAGATC	1	1	predicted	REG3G_+_79252926.23-P1P2	GTGTGAGGTTGCCCTTCCAC	2	2	predicted	REG3G_+_79252881.23-P1P2|REG3G_+_79252926.23-P1P2
PSME3	P1P2	significant	PSME3_-_40985447.23-P1P2	GTGAGCGGCGAAAGCcggga	1	1	empirical	PSME3_-_40985543.23-P1P2	GgtgagtaagccagcaagGG	2	5	empirical	PSME3_-_40985447.23-P1P2|PSME3_-_40985543.23-P1P2
AKIRIN1	P1P2	nonessential	AKIRIN1_+_39456935.23-P1P2	GCGCCTCCAGCACCCGGCAG	1	1	predicted	AKIRIN1_-_39457004.23-P1P2	GCCCGGCTGAGGAGCCTCTT	2	2	predicted	AKIRIN1_+_39456935.23-P1P2|AKIRIN1_-_39457004.23-P1P2
LETM2	P2	significant	LETM2_+_38261893.23-P2	GTGCCACTGGAGAACGGGAG	1	1	predicted	LETM2_+_38261899.23-P2	GAGGTCCTGCCACTGGAGAA	2	2	predicted	LETM2_+_38261893.23-P2|LETM2_+_38261899.23-P2
ACTR1B	P1P2	nonessential	ACTR1B_-_98280407.23-P1P2	GGCTGCAGGAGGCACCGGAT	1	1	predicted	ACTR1B_+_98280464.23-P1P2	GGTAGGCTGCAGGCTCGGGG	2	2	predicted	ACTR1B_-_98280407.23-P1P2|ACTR1B_+_98280464.23-P1P2
ZDHHC3	P1P2	significant	ZDHHC3_-_45017630.23-P1P2	GCGAGCTCTCCCGGCAGTGG	1	2	empirical	ZDHHC3_-_45017627.23-P1P2	GCATCGAGCTCTCCCGGCAG	2	1	empirical	ZDHHC3_-_45017630.23-P1P2|ZDHHC3_-_45017627.23-P1P2
MAN1C1	ENST00000374332.4	nonessential	MAN1C1_+_25944093.23-ENST00000374332.4	GAGCGAGTCCTCCCGCGAGG	1	1	predicted	MAN1C1_-_25944261.23-ENST00000374332.4	GACACGTGCCTGGACTCCGA	2	2	predicted	MAN1C1_+_25944093.23-ENST00000374332.4|MAN1C1_-_25944261.23-ENST00000374332.4
CYP4F3	P1P2	nonessential	CYP4F3_+_15752187.23-P1P2	GGGTGGTGAGTGAGGTCCTG	1	1	predicted	CYP4F3_+_15752084.23-P1P2	GAACAGGGATGGATAAACAG	2	2	predicted	CYP4F3_+_15752187.23-P1P2|CYP4F3_+_15752084.23-P1P2
KANSL1	P1P2	significant	KANSL1_-_44270236.23-P1P2	GGGATTCAGCCCCACAAAAT	1	9	empirical	KANSL1_-_44270717.23-P1P2	GCCGGCTCGGCGAGCGGTGG	2	4	empirical	KANSL1_-_44270236.23-P1P2|KANSL1_-_44270717.23-P1P2
MMP9	P1P2	nonessential	MMP9_+_44637557.23-P1P2	GTGCCAGAGGCTCATGGTGA	1	1	predicted	MMP9_+_44637623.23-P1P2	GGTGGACTGGCGCTGTCTGG	2	2	predicted	MMP9_+_44637557.23-P1P2|MMP9_+_44637623.23-P1P2
WIBG	P1P2	nonessential	WIBG_+_56321640.23-P1P2	GTCTGGGCGAGAAGCAACTA	1	1	predicted	WIBG_+_56321656.23-P1P2	GACTCAGGGTTAGGAGGTCT	2	2	predicted	WIBG_+_56321640.23-P1P2|WIBG_+_56321656.23-P1P2
SCGB1D1	P1P2	nonessential	SCGB1D1_+_61957855.23-P1P2	GTGACCTCGTGCTCAGAGAA	1	1	predicted	SCGB1D1_+_61957666.23-P1P2	GTGTGGAGCCGTGGAGCCCA	2	2	predicted	SCGB1D1_+_61957855.23-P1P2|SCGB1D1_+_61957666.23-P1P2
CASP8	P2	significant	CASP8_+_202098243.23-P2	GCTGTTGGCGGGGTACAGGC	1	1	predicted	CASP8_-_202098221.23-P2	GTCTGAGCTGGTCTGAAGGC	2	2	predicted	CASP8_+_202098243.23-P2|CASP8_-_202098221.23-P2
MYBPHL	P1P2	nonessential	MYBPHL_+_109849585.23-P1P2	GGCAGCCACAGCTCCGGAGG	1	1	predicted	MYBPHL_-_109849594.23-P1P2	GTGGATCCTGCGGCCACCTC	2	2	predicted	MYBPHL_+_109849585.23-P1P2|MYBPHL_-_109849594.23-P1P2
PLLP	P1P2	nonessential	PLLP_+_57318551.23-P1P2	GCAGCGCCTGGAGCCACACA	1	1	predicted	PLLP_-_57318560.23-P1P2	GCAGGCTCCGGATCCCTGTG	2	2	predicted	PLLP_+_57318551.23-P1P2|PLLP_-_57318560.23-P1P2
SBK1	P1P2	nonessential	SBK1_+_28303849.23-P1P2	GcccggGCTGCGCTCCATCG	1	1	predicted	SBK1_-_28304002.23-P1P2	GCGGCGACCGAGCCCCCCAG	2	2	predicted	SBK1_+_28303849.23-P1P2|SBK1_-_28304002.23-P1P2
MARK2	P2	nonessential	MARK2_+_63656051.23-P2	GAGCACACCAGAAGCAAGGT	1	1	predicted	MARK2_+_63656055.23-P2	GGGACAGCACACCAGAAGCA	2	2	predicted	MARK2_+_63656051.23-P2|MARK2_+_63656055.23-P2
CYP20A1	P1P2	nonessential	CYP20A1_+_204103755.23-P1P2	GCGCCCAGGGAGCCACGTCT	2	2	predicted	CYP20A1_-_204103791.23-P1P2	GCTGGGCGGCAGAACCATGT	3	3	predicted	CYP20A1_+_204103755.23-P1P2|CYP20A1_-_204103791.23-P1P2
FOXS1	P1P2	nonessential	FOXS1_-_30433385.23-P1P2	GTGCTGGGACCTGCTGGGTC	1	1	predicted	FOXS1_+_30433217.23-P1P2	GGGCAGCGGGCCACCCTCAG	2	2	predicted	FOXS1_-_30433385.23-P1P2|FOXS1_+_30433217.23-P1P2
TPRN	P1P2	nonessential	TPRN_-_140095175.23-P1P2	GggcggccATGCTGCGAACG	1	1	predicted	TPRN_-_140095185.23-P1P2	GCTGCGAACGCGGCAGCGGA	2	2	predicted	TPRN_-_140095175.23-P1P2|TPRN_-_140095185.23-P1P2
CCDC81	P1P2	nonessential	CCDC81_+_86106415.23-P1P2	GCTGCTGGGCCACTTCCTCA	1	1	predicted	CCDC81_+_86106478.23-P1P2	GAAGGAGTGCTAGTGCCTAG	2	2	predicted	CCDC81_+_86106415.23-P1P2|CCDC81_+_86106478.23-P1P2
PRY2	ENST00000341740.2	significant	PRY2_+_24242065.23-ENST00000341740.2	GACAGTCCGAGGTCAGTCTG	1	3	empirical	PRY2_+_24241721.23-ENST00000341740.2	GTAAAAATACCTCCTCCTGA	1	1	predicted	PRY2_+_24242065.23-ENST00000341740.2|PRY2_+_24241721.23-ENST00000341740.2
BIK	P1P2	significant	BIK_-_43506776.23-P1P2	GAGACACGAAGCCTCCCGGG	1	1	predicted	BIK_+_43506765.23-P1P2	GCGTCTGTAAGCCACCCGGG	2	2	predicted	BIK_-_43506776.23-P1P2|BIK_+_43506765.23-P1P2
ARSA	P1P2	nonessential	ARSA_+_51066539.23-P1P2	GCCCGGTACCGGCTCCTCCT	1	1	predicted	ARSA_+_51066550.23-P1P2	GAGCGCCCGCAGCCCGGTAC	2	2	predicted	ARSA_+_51066539.23-P1P2|ARSA_+_51066550.23-P1P2
NUDT18	P1P2	nonessential	NUDT18_-_21966909.23-P1P2	GAGCCCGCTCCCAGTCCCTG	1	1	predicted	NUDT18_+_21966865.23-P1P2	GCGCAGCGCACTCTAGCCCG	2	2	predicted	NUDT18_-_21966909.23-P1P2|NUDT18_+_21966865.23-P1P2
TESC	P1P2	nonessential	TESC_+_117537210.23-P1P2	GCGGCCCCACGCGGAACCCG	1	1	predicted	TESC_-_117537252.23-P1P2	GGGAGCGGGGCCTCATATAA	2	2	predicted	TESC_+_117537210.23-P1P2|TESC_-_117537252.23-P1P2
VLDLR	P1P2	nonessential	VLDLR_+_2621832.23-P1P2	GAAGAGAGCACAGAACGGAG	1	1	predicted	VLDLR_+_2621803.23-P1P2	GAGCGGAGCACCCGCACCGG	2	2	predicted	VLDLR_+_2621832.23-P1P2|VLDLR_+_2621803.23-P1P2
ZNF845	P1P2	nonessential	ZNF845_-_53837045.23-P1P2	GAGTGATGGTCCCACCGCAG	1	1	predicted	ZNF845_+_53837220.23-P1P2	GCGGGAAGGGACCATCCTCA	2	2	predicted	ZNF845_-_53837045.23-P1P2|ZNF845_+_53837220.23-P1P2
F12	P2	nonessential	F12_-_176831501.23-P2	GCCAGCCCCACGCGGCGCAC	1	1	predicted	F12_-_176831430.23-P2	GGGTTCCTGTAGCCACACGA	2	2	predicted	F12_-_176831501.23-P2|F12_-_176831430.23-P2
POSTN	P2	nonessential	POSTN_-_38154691.23-P2	GCTGTGGAGGTGCCACTAAT	1	1	predicted	POSTN_+_38154681.23-P2	GCTTTAGGTAAGCCTATTAG	2	2	predicted	POSTN_-_38154691.23-P2|POSTN_+_38154681.23-P2
SLC25A12	P1P2	nonessential	SLC25A12_+_172750711.23-P1P2	GGAGCACAGCATGGCGGTCA	1	1	predicted	SLC25A12_+_172750720.23-P1P2	GCCGGCTTCCGAGCACAGCA	2	2	predicted	SLC25A12_+_172750711.23-P1P2|SLC25A12_+_172750720.23-P1P2
GP2	P1	nonessential	GP2_+_20338787.23-P1	GCGCTTTGTGTTCTCATCGG	1	1	predicted	GP2_+_20338825.23-P1	GACAGCAGGCTGCATTCCCA	2	2	predicted	GP2_+_20338787.23-P1|GP2_+_20338825.23-P1
ZNF25	P1P2	nonessential	ZNF25_+_38265525.23-P1P2	GGGTCTTACGCCCTAGGGTG	1	1	predicted	ZNF25_-_38265516.23-P1P2	GAGCCCAGACCCGGAGGCAC	2	2	predicted	ZNF25_+_38265525.23-P1P2|ZNF25_-_38265516.23-P1P2
IKZF2	P2	nonessential	IKZF2_+_214016306.23-P2	GTGCTCCTCGCTGAAGATGG	1	1	predicted	IKZF2_-_214016267.23-P2	GCAGTTGGTGGTGGAAACTA	2	2	predicted	IKZF2_+_214016306.23-P2|IKZF2_-_214016267.23-P2
UNC13A	P1P2	nonessential	UNC13A_+_17799129.23-P1P2	GGAACCAAGATGGCCGGTGG	1	1	predicted	UNC13A_+_17799101.23-P1P2	GCCCGGCGTGAGCCAAGCGC	2	2	predicted	UNC13A_+_17799129.23-P1P2|UNC13A_+_17799101.23-P1P2
TMEM91	P2	significant	TMEM91_-_41882903.23-P2	GAGGCTTGGGGACCTTCCAG	1	2	empirical	TMEM91_-_41882466.23-P2	GGGCCTGGGCTCACGAGGAA	1	1	predicted	TMEM91_-_41882903.23-P2|TMEM91_-_41882466.23-P2
PAAF1	P1P2	significant	PAAF1_+_73588075.23-P1P2	GAGTCGCTCTGAATCCTCAA	1	1	empirical	PAAF1_+_73588485.23-P1P2	GGGGGCCTAGGAGAATACAA	2	4	empirical	PAAF1_+_73588075.23-P1P2|PAAF1_+_73588485.23-P1P2
SCO1	P1P2	significant	SCO1_-_10600802.23-P1P2	GGAGGCCGCATAACTCGTCC	1	3	empirical	SCO1_+_10600798.23-P1P2	GCGATGCTGGTCCTAGTACC	2	4	empirical	SCO1_-_10600802.23-P1P2|SCO1_+_10600798.23-P1P2
SPIN2B	P1P2	nonessential	SPIN2B_+_57147934.23-P1P2	GGACTGGTGGAATCCCGATG	1	1	predicted	SPIN2B_+_57147877.23-P1P2	GGCTAGCGAGCCAAGCGGTG	2	2	predicted	SPIN2B_+_57147934.23-P1P2|SPIN2B_+_57147877.23-P1P2
ZNF865	P1P2	nonessential	ZNF865_-_56125009.23-P1P2	GAGGCGAACCCAGCGggcag	1	1	predicted	ZNF865_-_56125002.23-P1P2	GGAGATGGAGGCGAACCCAG	2	2	predicted	ZNF865_-_56125009.23-P1P2|ZNF865_-_56125002.23-P1P2
ILVBL	P1P2	nonessential	ILVBL_+_15236471.23-P1P2	GAGGCAGCGCCATATCCTGG	1	1	predicted	ILVBL_+_15236507.23-P1P2	GGGGTCACGTGACACGGAGG	2	2	predicted	ILVBL_+_15236471.23-P1P2|ILVBL_+_15236507.23-P1P2
MBD3L4	ENST00000381394.4	nonessential	MBD3L4_+_7039984.23-ENST00000381394.4	GTTGTGGAAAGTGATACCTC	1	1	predicted	MBD3L4_+_7039981.23-ENST00000381394.4	GTGGAAAGTGATACCTCAGG	2	2	predicted	MBD3L4_+_7039984.23-ENST00000381394.4|MBD3L4_+_7039981.23-ENST00000381394.4
IRF2BP2	P2	significant	IRF2BP2_-_234743498.23-P2	GGGGATCTTGAGCCCCTCTG	1.5	8	empirical	IRF2BP2_-_234743790.23-P2	GTCAGGCGTACGGGATTCTG	1.5	1	empirical	IRF2BP2_-_234743498.23-P2|IRF2BP2_-_234743790.23-P2
NARG2	P1P2	significant	NARG2_+_60770923.23-P1P2	GCACTGGGTCGAAGTGTGAG	1	2	empirical	NARG2_-_60770907.23-P1P2	GGACACCGAACGGGCCCGAC	2	3	empirical	NARG2_+_60770923.23-P1P2|NARG2_-_60770907.23-P1P2
KRT33A	P1P2	nonessential	KRT33A_+_39507063.23-P1P2	GGACCCACCGCTCTACAACC	1	1	predicted	KRT33A_-_39507067.23-P1P2	GGACAGAGTCCAAAATCTCC	2	2	predicted	KRT33A_+_39507063.23-P1P2|KRT33A_-_39507067.23-P1P2
CMAS	P1P2	essential	CMAS_-_22199218.23-P1P2	GCCCGGATGTGGAGAAGCTG	1	3	essential	CMAS_-_22199189.23-P1P2	GCGCCGAGCTGAGGTGGTGA	2	2	essential	CMAS_-_22199218.23-P1P2|CMAS_-_22199189.23-P1P2
TBC1D10B	P1P2	nonessential	TBC1D10B_+_30381740.23-P1P2	GGGCTCGCCCCCAAGCAGGA	1	1	predicted	TBC1D10B_-_30381594.23-P1P2	GGCGAGGCCAGCCGAGAAAG	2	2	predicted	TBC1D10B_+_30381740.23-P1P2|TBC1D10B_-_30381594.23-P1P2
WFS1	P1P2	nonessential	WFS1_+_6271634.23-P1P2	GGGCGCAAACGGGAGATCTG	1	1	predicted	WFS1_+_6271569.23-P1P2	GCGCGGCCTTCTGCACGAGG	2	2	predicted	WFS1_+_6271634.23-P1P2|WFS1_+_6271569.23-P1P2
SPATA31D1	P1P2	nonessential	SPATA31D1_-_84604088.23-P1P2	GAGAGGTTGGGCAGACATAG	1	1	predicted	SPATA31D1_+_84604129.23-P1P2	GCCAGATAGGTAGCTTCACA	2	2	predicted	SPATA31D1_-_84604088.23-P1P2|SPATA31D1_+_84604129.23-P1P2
MRPS9	P1P2	essential	MRPS9_-_105654578.23-P1P2	GCGCCCTGTGTGTCCTACGG	1	4	essential	MRPS9_-_105654556.23-P1P2	GGCTCCCACAGCTAACATGG	2	3	essential	MRPS9_-_105654578.23-P1P2|MRPS9_-_105654556.23-P1P2
KRTAP19-1	P1P2	nonessential	KRTAP19-1_-_31852637.23-P1P2	GTAGCTGCCGTAGTGACTCA	1	1	predicted	KRTAP19-1_+_31852677.23-P1P2	GCATGCTGGCATTCACACTC	2	2	predicted	KRTAP19-1_-_31852637.23-P1P2|KRTAP19-1_+_31852677.23-P1P2
C3orf67	P1P2	nonessential	C3orf67_+_59035672.23-P1P2	GTTGTCTGTGGCTCCGCGAC	1	1	predicted	C3orf67_+_59035684.23-P1P2	GGCCAGCGGGCGGTTGTCTG	2	2	predicted	C3orf67_+_59035672.23-P1P2|C3orf67_+_59035684.23-P1P2
DUSP10	P1P2	nonessential	DUSP10_+_221915387.23-P1P2	GAATGAAGCCGAGTGAATGG	1	1	predicted	DUSP10_+_221915343.23-P1P2	GGAAGAGGAGCGCCAGATGG	2	2	predicted	DUSP10_+_221915387.23-P1P2|DUSP10_+_221915343.23-P1P2
TRANK1	ENST00000429976.2	nonessential	TRANK1_-_36986490.23-ENST00000429976.2	GACCCAGCCGCGATCAGAGG	1	1	predicted	TRANK1_-_36986360.23-ENST00000429976.2	GTGGGGAAGCGCTTCCCTGT	2	2	predicted	TRANK1_-_36986490.23-ENST00000429976.2|TRANK1_-_36986360.23-ENST00000429976.2
FOSB	P1	nonessential	FOSB_-_45971307.23-P1	GGACACGCGGAACCAAGACT	1	1	predicted	FOSB_-_45971281.23-P1	GAGACTCAGAGCTACGGCCA	2	2	predicted	FOSB_-_45971307.23-P1|FOSB_-_45971281.23-P1
SCGB1A1	P1P2	nonessential	SCGB1A1_+_62186562.23-P1P2	GGTGACAGCGAGTTTCATGG	2	2	predicted	SCGB1A1_+_62186589.23-P1P2	GCAGAGAGCCAGTGTGACCA	3	3	predicted	SCGB1A1_+_62186562.23-P1P2|SCGB1A1_+_62186589.23-P1P2
IMMP1L	P1P2	significant	IMMP1L_-_31530770.23-P1P2	GTTCCAAACCACCTACCACT	1	9	empirical	IMMP1L_+_31531143.23-P1P2	GAGTGCGCCCTACGAAAGGA	2	1	empirical	IMMP1L_-_31530770.23-P1P2|IMMP1L_+_31531143.23-P1P2
PHLPP1	P1P2	nonessential	PHLPP1_-_60382962.23-P1P2	GTACAGCGACTCCCCGAGCT	1	1	predicted	PHLPP1_+_60382780.23-P1P2	GGTTGTGCGCGGCCGTTCCA	2	2	predicted	PHLPP1_-_60382962.23-P1P2|PHLPP1_+_60382780.23-P1P2
RORA	ENST00000335670.6	nonessential	RORA_-_61521640.23-ENST00000335670.6	GAGCGCGCGGAGTGTCTGGG	1	1	predicted	RORA_-_61521637.23-ENST00000335670.6	GGGGAGCGCGCGGAGTGTCT	2	2	predicted	RORA_-_61521640.23-ENST00000335670.6|RORA_-_61521637.23-ENST00000335670.6
TSPAN7	P1P2	nonessential	TSPAN7_-_38420802.23-P1P2	GccgccgGAGCTCTGTAGTA	1	1	predicted	TSPAN7_-_38420817.23-P1P2	GAGTATGGCATCGAGGAGAA	2	2	predicted	TSPAN7_-_38420802.23-P1P2|TSPAN7_-_38420817.23-P1P2
PRSS38	P1P2	nonessential	PRSS38_+_228003424.23-P1P2	GGGGCCCATGACGGAAGCAG	1	1	predicted	PRSS38_+_228003607.23-P1P2	GGCACCGACAGACGCCCCAA	2	2	predicted	PRSS38_+_228003424.23-P1P2|PRSS38_+_228003607.23-P1P2
C11orf30	P1P2	significant	C11orf30_+_76156106.23-P1P2	GACTAGGGGACACCAGGAAT	1	6	empirical	C11orf30_+_76156112.23-P1P2	GGCCAAGACTAGGGGACACC	2	5	empirical	C11orf30_+_76156106.23-P1P2|C11orf30_+_76156112.23-P1P2
SMC1A	P1P2	essential	SMC1A_-_53449606.23-P1P2	GGCCGTACGCCCGAGAACTG	1	1	essential	SMC1A_+_53449593.23-P1P2	GGCGGGCTACCTCAGTTCTC	2	5	essential	SMC1A_-_53449606.23-P1P2|SMC1A_+_53449593.23-P1P2
CARD11	P1P2	nonessential	CARD11_+_3083354.23-P1P2	GGTCGCCTGGAGGAAGCCGG	1	1	predicted	CARD11_-_3083491.23-P1P2	GgcAGGAGTCCGAAGGCCAG	2	2	predicted	CARD11_+_3083354.23-P1P2|CARD11_-_3083491.23-P1P2
SERPINB6	P1P2	nonessential	SERPINB6_-_2971548.23-P1P2	GCCCAAGCCGGACGCTCGCC	1	1	predicted	SERPINB6_+_2971503.23-P1P2	GCCCTTCCGGAGCCTCGCAG	2	2	predicted	SERPINB6_-_2971548.23-P1P2|SERPINB6_+_2971503.23-P1P2
ZNF329	P1	nonessential	ZNF329_-_58662123.23-P1	GATGCGTCGGCACTTACGGT	1	1	predicted	ZNF329_-_58662101.23-P1	GGGAGGCAGCGCAGGGCTCA	2	2	predicted	ZNF329_-_58662123.23-P1|ZNF329_-_58662101.23-P1
ADAMTS4	P1P2	nonessential	ADAMTS4_+_161168828.23-P1P2	GAGGCTGGGGAGAACCCACA	1	1	predicted	ADAMTS4_-_161168836.23-P1P2	GTGTCTGTGGGTCTCCCTGT	2	2	predicted	ADAMTS4_+_161168828.23-P1P2|ADAMTS4_-_161168836.23-P1P2
STRA6	P1P2	nonessential	STRA6_-_74495070.23-P1P2	GACACCAGAAGGGAGGCCCA	1	1	predicted	STRA6_+_74495026.23-P1P2	GTCTGTGGGTCTGTCTAGGT	2	2	predicted	STRA6_-_74495070.23-P1P2|STRA6_+_74495026.23-P1P2
CHD6	P1P2	significant	CHD6_+_40246867.23-P1P2	GgTTAGGGTGCCCCTATGAA	1	6	empirical	CHD6_+_40246582.23-P1P2	Gcgtgccgaggccccccccg	2	2	empirical	CHD6_+_40246867.23-P1P2|CHD6_+_40246582.23-P1P2
IQUB	P1P2	nonessential	IQUB_+_123174606.23-P1P2	GGCTGAGAACGCGGCGAGTA	1	1	predicted	IQUB_+_123174615.23-P1P2	GCGACCAACAGCTGAGAACG	2	2	predicted	IQUB_+_123174606.23-P1P2|IQUB_+_123174615.23-P1P2
C17orf82	P1P2	nonessential	C17orf82_+_59489175.23-P1P2	GGGAGCTGCGGCCTTCGGGA	1	1	predicted	C17orf82_+_59489153.23-P1P2	GCAGGGCCAGGCCATACCGG	2	2	predicted	C17orf82_+_59489175.23-P1P2|C17orf82_+_59489153.23-P1P2
RPS27A	P1P2	essential	RPS27A_-_55459862.23-P1P2	GGCGGTGGGTGTCTGCACTT	1	5	essential	RPS27A_+_55459832.23-P1P2	GAGACACCCACCGCAGATGG	2	4	essential	RPS27A_-_55459862.23-P1P2|RPS27A_+_55459832.23-P1P2
PER1	P1	nonessential	PER1_+_8059606.23-P1	GAGCGGTGAGTGCTCGGGGA	1	1	predicted	PER1_+_8059611.23-P1	GCGCCGAGCGGTGAGTGCTC	2	2	predicted	PER1_+_8059606.23-P1|PER1_+_8059611.23-P1
ADPGK	P1P2	nonessential	ADPGK_+_73076082.23-P1P2	GCGCGCGCCGAGCCCGGAAG	1	1	predicted	ADPGK_+_73076066.23-P1P2	GAAGAGGCGCGGGCTAGGAA	2	2	predicted	ADPGK_+_73076082.23-P1P2|ADPGK_+_73076066.23-P1P2
PACSIN2	P1P2	nonessential	PACSIN2_+_43411099.23-P1P2	GAGTGCTGCCGGAGCAAAAG	1	1	predicted	PACSIN2_+_43411127.23-P1P2	GGGCCGCAGGGGTCTGGGCA	2	2	predicted	PACSIN2_+_43411099.23-P1P2|PACSIN2_+_43411127.23-P1P2
FBXO24	P1P2	nonessential	FBXO24_-_100184112.23-P1P2	GGCCGAGGGACCGCAAGCAG	1	1	predicted	FBXO24_-_100184091.23-P1P2	GACTCCACTAGCAGGAAAAC	2	2	predicted	FBXO24_-_100184112.23-P1P2|FBXO24_-_100184091.23-P1P2
EPB41L1	P1P2	nonessential	EPB41L1_-_34742904.23-P1P2	GCAGCCCTGGGGAGGAACGG	1	1	predicted	EPB41L1_+_34742651.23-P1P2	GTGGATGCCGACTgcagcag	2	2	predicted	EPB41L1_-_34742904.23-P1P2|EPB41L1_+_34742651.23-P1P2
DBX1	P1P2	nonessential	DBX1_+_20182016.23-P1P2	GCTCGACGAGAGGACCACGG	1	1	predicted	DBX1_+_20181995.23-P1P2	GGACTCGCAGACGCCCAAGT	2	2	predicted	DBX1_+_20182016.23-P1P2|DBX1_+_20181995.23-P1P2
PKNOX1	P1P2	nonessential	PKNOX1_+_44394727.23-P1P2	GACAAGCGGCTGCAGCAATC	1	1	predicted	PKNOX1_-_44394704.23-P1P2	GCCAGCGTCGGCGTGACGGT	2	2	predicted	PKNOX1_+_44394727.23-P1P2|PKNOX1_-_44394704.23-P1P2
TBC1D14	P1P2	nonessential	TBC1D14_+_6911646.23-P1P2	GGCGGCTCCGACGCCATCCC	1	1	predicted	TBC1D14_-_6911392.23-P1P2	GcccccggAAGAGGGACAGC	2	2	predicted	TBC1D14_+_6911646.23-P1P2|TBC1D14_-_6911392.23-P1P2
HNRNPH3	P1P2	nonessential	HNRNPH3_-_70092045.23-P1P2	GCGGGAGAAGGACGAAAGGC	2	2	predicted	HNRNPH3_+_70091878.23-P1P2	GCGTGTAGCGCTCGCCACAA	4	4	predicted	HNRNPH3_-_70092045.23-P1P2|HNRNPH3_+_70091878.23-P1P2
DKK3	P1P2	nonessential	DKK3_+_12030120.23-P1P2	GGCGCAGAGCGGAGATGCAG	1	1	predicted	DKK3_+_12030151.23-P1P2	GGCGTTCCGGGACACACAGG	2	2	predicted	DKK3_+_12030120.23-P1P2|DKK3_+_12030151.23-P1P2
CACNA1C	P1P2	nonessential	CACNA1C_+_2162254.23-P1P2	GAAGGGAGCCGGCAACTCCT	1	1	predicted	CACNA1C_-_2162196.23-P1P2	GGAAACAGCTCCTGCCAGAg	2	2	predicted	CACNA1C_+_2162254.23-P1P2|CACNA1C_-_2162196.23-P1P2
ITGAM	P1P2	nonessential	ITGAM_+_31271344.23-P1P2	GCTGGAAGGAGGTGAACCAG	1	1	predicted	ITGAM_-_31271498.23-P1P2	GTAGAGGGCCCAGAATATGT	2	2	predicted	ITGAM_+_31271344.23-P1P2|ITGAM_-_31271498.23-P1P2
SLC4A2	P2	nonessential	SLC4A2_+_150759734.23-P2	GTCGCACCTGAGGCCGCAGG	1	1	predicted	SLC4A2_+_150759720.23-P2	GGCAGGAGGAAGTCCATGGC	2	2	predicted	SLC4A2_+_150759734.23-P2|SLC4A2_+_150759720.23-P2
LYRM1	P1P2	nonessential	LYRM1_+_20912104.23-P1P2	GGCCGTGGCCGACCGAGCAC	1	1	predicted	LYRM1_+_20912159.23-P1P2	GAGAAGCGCGCAGCCCGCGG	2	2	predicted	LYRM1_+_20912104.23-P1P2|LYRM1_+_20912159.23-P1P2
KRT10	P2	nonessential	KRT10_+_38975898.23-P2	GCAGGCCCAGATATCCGCTC	1	1	predicted	KRT10_-_38975915.23-P2	GTCTTCCAGAGCGGATATCT	2	2	predicted	KRT10_+_38975898.23-P2|KRT10_-_38975915.23-P2
ST3GAL4	P1P2	nonessential	ST3GAL4_+_126225663.23-P1P2	GCGCTAGGCGCACCGACCGG	1	1	predicted	ST3GAL4_+_126225666.23-P1P2	GATCCGCTAGGCGCACCGAC	2	2	predicted	ST3GAL4_+_126225663.23-P1P2|ST3GAL4_+_126225666.23-P1P2
ZNF580	P2	nonessential	ZNF580_-_56146421.23-P2	GGCGTAGGGATAGGGAGACC	1	1	predicted	ZNF580_-_56146585.23-P2	GGAGGGGCTACGGTGACCAG	2	2	predicted	ZNF580_-_56146421.23-P2|ZNF580_-_56146585.23-P2
IKZF5	P1P2	nonessential	IKZF5_+_124768268.23-P1P2	Gactgtgacggtgacgaaga	1	1	predicted	IKZF5_+_124768262.23-P1P2	Gacggtgacgaagacggcgg	2	2	predicted	IKZF5_+_124768268.23-P1P2|IKZF5_+_124768262.23-P1P2
CST9L	P1P2	nonessential	CST9L_-_23549074.23-P1P2	GAGGACAGACCTCCCTTCCA	1	1	predicted	CST9L_+_23549104.23-P1P2	GCTGGGAAGAGCAAAGTCAG	2	2	predicted	CST9L_-_23549074.23-P1P2|CST9L_+_23549104.23-P1P2
HNRNPAB	P1P2	nonessential	HNRNPAB_-_177631589.23-P1P2	GTGGTCGGTGGGTTCCCGTG	1	1	predicted	HNRNPAB_-_177631574.23-P1P2	GACGGAGCTTGGCTGTTGGT	2	2	predicted	HNRNPAB_-_177631589.23-P1P2|HNRNPAB_-_177631574.23-P1P2
MIEF2	P1P2	nonessential	MIEF2_+_18163931.23-P1P2	GCCAACGACTAGGGCCCCGG	1	1	predicted	MIEF2_+_18163963.23-P1P2	GGCCTGGGAATGGAACGTGA	2	2	predicted	MIEF2_+_18163931.23-P1P2|MIEF2_+_18163963.23-P1P2
RAB5C	P2	significant	RAB5C_-_40282561.23-P2	GTCCAGAGAGCGTGCGGGTG	1	1	predicted	RAB5C_-_40282555.23-P2	GTAGTGGTCCAGAGAGCGTG	2	2	predicted	RAB5C_-_40282561.23-P2|RAB5C_-_40282555.23-P2
PAK4	P1P2	nonessential	PAK4_-_39616453.23-P1P2	GCGTTGGGGATTCAACATGG	1	1	predicted	PAK4_-_39616471.23-P1P2	GGCGGCGGGAGTGTCCGCGG	2	2	predicted	PAK4_-_39616453.23-P1P2|PAK4_-_39616471.23-P1P2
SPATA25	P1P2	nonessential	SPATA25_-_44516230.23-P1P2	GGGAGTCCTGAAGTAGGACA	1	1	predicted	SPATA25_-_44516198.23-P1P2	GGGCCGGAAGGCAGAGGACC	2	2	predicted	SPATA25_-_44516230.23-P1P2|SPATA25_-_44516198.23-P1P2
RPS11	P1P2	significant	RPS11_-_49999745.23-P1P2	GTCAGGTGCGGACTCGGGGT	1	8	empirical	RPS11_-_49999733.23-P1P2	GGATGGCGGACATTCAGGTG	2	3	empirical	RPS11_-_49999745.23-P1P2|RPS11_-_49999733.23-P1P2
C4orf33	P1	nonessential	C4orf33_-_130014912.23-P1	GGCGCGGCGGCCAAACTGGT	1	1	predicted	C4orf33_+_130014922.23-P1	GGAGGTTGGGCCTCACTACC	2	2	predicted	C4orf33_-_130014912.23-P1|C4orf33_+_130014922.23-P1
EPN3	P2	nonessential	EPN3_-_48611992.23-P2	GAGGCCCACGACCCGCTGGA	1	1	predicted	EPN3_+_48611963.23-P2	GCGGGTCGTGGGCCTTCTGT	2	2	predicted	EPN3_-_48611992.23-P2|EPN3_+_48611963.23-P2
GPR155	P1P2	nonessential	GPR155_+_175351770.23-P1P2	GtgagCTGACAGGGCCGCAT	1	1	predicted	GPR155_-_175351765.23-P1P2	GGTTCCGATAAAGTAAGGTG	2	2	predicted	GPR155_+_175351770.23-P1P2|GPR155_-_175351765.23-P1P2
RNF130	P1P2	nonessential	RNF130_+_179498719.23-P1P2	GGAGCCCGGTCCGCGAGCAG	1	1	predicted	RNF130_-_179498712.23-P1P2	GgcgcAGCTCATCGTCCCTC	2	2	predicted	RNF130_+_179498719.23-P1P2|RNF130_-_179498712.23-P1P2
LGALS1	P1	nonessential	LGALS1_-_38071712.23-P1	GATCCTCCTGGACTCAATCA	1	1	predicted	LGALS1_+_38071683.23-P1	GGAGTCCAGGAGGATGTTCC	2	2	predicted	LGALS1_-_38071712.23-P1|LGALS1_+_38071683.23-P1
HYAL1	P2	nonessential	HYAL1_+_50336828.23-P2	GACCAGGGGCGGGTTCTAAG	1	1	predicted	HYAL1_+_50336842.23-P2	GGTTGTGACGCGCAAACCAG	2	2	predicted	HYAL1_+_50336828.23-P2|HYAL1_+_50336842.23-P2
LRRC16B	P1P2	nonessential	LRRC16B_+_24521286.23-P1P2	GccgcggcACATGCTAGACC	1	1	predicted	LRRC16B_-_24521241.23-P1P2	GCAGCCGCCCCTGACCGGAG	2	2	predicted	LRRC16B_+_24521286.23-P1P2|LRRC16B_-_24521241.23-P1P2
SNX18	P1P2	nonessential	SNX18_-_53813609.23-P1P2	GAGTCGGCGCTGCGAAGTGG	1	1	predicted	SNX18_-_53813621.23-P1P2	GGAAGTGGAGGCGCTGCGAG	2	2	predicted	SNX18_-_53813609.23-P1P2|SNX18_-_53813621.23-P1P2
MYCBP2	P1P2	significant	MYCBP2_+_77901201.23-P1P2	GCCATTGCGGGTAGCCCcgg	1	1	empirical	MYCBP2_+_77901103.23-P1P2	GAGATGAGCGGCCCCAGTAG	2	4	empirical	MYCBP2_+_77901201.23-P1P2|MYCBP2_+_77901103.23-P1P2
SRSF6	P1	significant	SRSF6_+_42086965.23-P1	GGAGGGCCGGACAACCGCGG	1	2	empirical	SRSF6_-_42086572.23-P1	GCGGCCGCCCCTGTGGTGTG	2	1	empirical	SRSF6_+_42086965.23-P1|SRSF6_-_42086572.23-P1
GPR113	P1P2	nonessential	GPR113_+_26568639.23-P1P2	GGCACTTGCGTGGTGATCTG	1	1	predicted	GPR113_-_26568634.23-P1P2	GTCTACCCCCAAGACTAAAA	2	2	predicted	GPR113_+_26568639.23-P1P2|GPR113_-_26568634.23-P1P2
SCLT1	P1P2	nonessential	SCLT1_-_130014602.23-P1P2	GGAGTGCCGCGGGAGCTTGA	1	1	predicted	SCLT1_-_130014633.23-P1P2	GAGCGGCGTTCTACGCGGAG	2	2	predicted	SCLT1_-_130014602.23-P1P2|SCLT1_-_130014633.23-P1P2
KLRD1	P1P2	nonessential	KLRD1_+_10460492.23-P1P2	GATGTTCTTGAATCATCTAT	1	1	predicted	KLRD1_-_10460446.23-P1P2	GGGTTCCTGGAACACTTCAG	2	2	predicted	KLRD1_+_10460492.23-P1P2|KLRD1_-_10460446.23-P1P2
SAMD1	P1P2	nonessential	SAMD1_+_14201518.23-P1P2	GGCGCGCGCCCAGCAGAAGC	1	1	predicted	SAMD1_+_14201337.23-P1P2	GAGGCGCTGCGCCCCCCggg	2	2	predicted	SAMD1_+_14201518.23-P1P2|SAMD1_+_14201337.23-P1P2
ARPC1B	P1P2	significant	ARPC1B_-_98972410.23-P1P2	GGCCGGGGCGCGGGAGGTGA	1	3	empirical	ARPC1B_-_98972364.23-P1P2	GGCGGAGCCCAGAGCCGGTT	1	1	predicted	ARPC1B_-_98972410.23-P1P2|ARPC1B_-_98972364.23-P1P2
CAPRIN1	P1P2	nonessential	CAPRIN1_-_34073288.23-P1P2	GGCTCTCGCCTCACTAGGAG	1	1	predicted	CAPRIN1_+_34073257.23-P1P2	GTGAGGCGAGAGCCGGGAGC	2	2	predicted	CAPRIN1_-_34073288.23-P1P2|CAPRIN1_+_34073257.23-P1P2
SULT1A2	P1P2	nonessential	SULT1A2_-_28608304.23-P1P2	GAGGGCGTCCTGGGCCATTC	1	1	predicted	SULT1A2_+_28608296.23-P1P2	GGGTGAGTGACACACCGGAA	2	2	predicted	SULT1A2_-_28608304.23-P1P2|SULT1A2_+_28608296.23-P1P2
PAPOLG	P1P2	significant	PAPOLG_+_60983709.23-P1P2	GGTGCAGGGCGCAAGGGACA	1	5	empirical	PAPOLG_-_60983780.23-P1P2	GGCTCCCGGCCGGTCCGCAA	2	4	empirical	PAPOLG_+_60983709.23-P1P2|PAPOLG_-_60983780.23-P1P2
NAGK	P1P2	nonessential	NAGK_-_71295802.23-P1P2	GACGGCGGGACCAGCAGCGA	1	1	predicted	NAGK_+_71296014.23-P1P2	GCACAGGCAGAGTCCCCGTA	2	2	predicted	NAGK_-_71295802.23-P1P2|NAGK_+_71296014.23-P1P2
PTPN14	P1P2	nonessential	PTPN14_+_214724894.23-P1P2	GGCAGCGGGCGCAGACTCGG	1	1	predicted	PTPN14_+_214724909.23-P1P2	GCTCGGCGGAGTGAGCGCAG	2	2	predicted	PTPN14_+_214724894.23-P1P2|PTPN14_+_214724909.23-P1P2
TRIM16	P1P2	nonessential	TRIM16_-_15587563.23-P1P2	GACAGAGAGGGTGTCTGCTC	1	1	predicted	TRIM16_-_15587626.23-P1P2	GCAGAGAAAGGGGCCGGAAA	2	2	predicted	TRIM16_-_15587563.23-P1P2|TRIM16_-_15587626.23-P1P2
OR2M5	ENST00000366476.1	nonessential	OR2M5_-_248308656.23-ENST00000366476.1	GCTCAGTCAACTGTTCCTCA	1	1	predicted	OR2M5_+_248308898.23-ENST00000366476.1	GGATTGCATCCATAGAGCCC	2	2	predicted	OR2M5_-_248308656.23-ENST00000366476.1|OR2M5_+_248308898.23-ENST00000366476.1
SOX11	P1P2	nonessential	SOX11_+_5832577.23-P1P2	GagcCCGGGACCCCTCTCTC	1	1	predicted	SOX11_-_5832580.23-P1P2	GTGCGGTAGGAGCCACGAGC	2	2	predicted	SOX11_+_5832577.23-P1P2|SOX11_-_5832580.23-P1P2
DKC1	P1P2	essential	DKC1_-_153991190.23-P1P2	GCCAAGGCGGCGGGAGTCTG	1	5	essential	DKC1_-_153991174.23-P1P2	GGCGCGGCCTGACGGGACCA	2	6	essential	DKC1_-_153991190.23-P1P2|DKC1_-_153991174.23-P1P2
DBF4	P1P2	significant	DBF4_-_87505724.23-P1P2	GGcgagaaggcaggcacgag	1	2	empirical	DBF4_+_87505889.23-P1P2	GGGTACCGCGTCTGCAGGTC	2	8	empirical	DBF4_-_87505724.23-P1P2|DBF4_+_87505889.23-P1P2
PLCH1	P1	nonessential	PLCH1_-_155462818.23-P1	GAGCAGAAGCCCCAGACGAG	2	2	predicted	PLCH1_+_155462611.23-P1	GAGGAGGTCAGTGCTTTCGG	3	3	predicted	PLCH1_-_155462818.23-P1|PLCH1_+_155462611.23-P1
EHD4	P1P2	nonessential	EHD4_+_42264727.23-P1P2	GAGCCGGGGAGAGTCGAACC	1	1	predicted	EHD4_-_42264746.23-P1P2	GCTCCGGGTTCGACTCTCCC	2	2	predicted	EHD4_+_42264727.23-P1P2|EHD4_-_42264746.23-P1P2
C6orf47	P1P2	nonessential	C6orf47_-_31628496.23-P1P2	GGCTCCCGGGCCCAGCGTCG	1	1	predicted	C6orf47_+_31628523.23-P1P2	GCAGCTGCTTCCGGGCTTCG	2	2	predicted	C6orf47_-_31628496.23-P1P2|C6orf47_+_31628523.23-P1P2
LOC401052	P1P2	nonessential	LOC401052_+_10052832.23-P1P2	GACACAGAGCGCGGCCTGGG	1	1	predicted	LOC401052_+_10052774.23-P1P2	GGGCGCTGCTGCCCCAACAC	2	2	predicted	LOC401052_+_10052832.23-P1P2|LOC401052_+_10052774.23-P1P2
S100A7	P1P2	nonessential	S100A7_-_153432782.23-P1P2	GCAACCGGGACCCCAACAGG	1	1	predicted	S100A7_-_153432779.23-P1P2	GTAGCAACCGGGACCCCAAC	2	2	predicted	S100A7_-_153432782.23-P1P2|S100A7_-_153432779.23-P1P2
TIMM21	P1P2	significant	TIMM21_-_71815966.23-P1P2	GATAGGCTTGAGTACGTGTC	1	1	predicted	TIMM21_-_71815718.23-P1P2	GCGTATCCCAGTTAAGAGCG	2	2	predicted	TIMM21_-_71815966.23-P1P2|TIMM21_-_71815718.23-P1P2
DSE	P2	nonessential	DSE_+_116575361.23-P2	GAGAAGACAAAGGAATACGA	1	1	predicted	DSE_-_116575415.23-P2	GGAATTTCGTCAGTCTGGAA	2	2	predicted	DSE_+_116575361.23-P2|DSE_-_116575415.23-P2
MYSM1	P1P2	significant	MYSM1_+_59165688.23-P1P2	GGGCGGATGTGGATATCGAA	1	1	empirical	MYSM1_+_59165708.23-P1P2	GCCCATCATGGCGGCTGAAG	2	5	empirical	MYSM1_+_59165688.23-P1P2|MYSM1_+_59165708.23-P1P2
ITIH2	P1P2	nonessential	ITIH2_+_7745352.23-P1P2	GTCCCCAAAGCAGATGGTCT	1	1	predicted	ITIH2_+_7745314.23-P1P2	GCCTACTGAACCAAGTTCAA	2	2	predicted	ITIH2_+_7745352.23-P1P2|ITIH2_+_7745314.23-P1P2
CHRNA10	ENST00000250699.2	nonessential	CHRNA10_-_3692566.23-ENST00000250699.2	GCCTGGCACTGCAAGAGCGG	1	1	predicted	CHRNA10_-_3692605.23-ENST00000250699.2	GGGCCTCCTGGCCAGACCTA	2	2	predicted	CHRNA10_-_3692566.23-ENST00000250699.2|CHRNA10_-_3692605.23-ENST00000250699.2
MTRNR2L2	ENST00000604882.1	nonessential	MTRNR2L2_-_79946830.23-ENST00000604882.1	GTGGTTTGGTTAAGGTTGTT	1	1	predicted	MTRNR2L2_-_79946838.23-ENST00000604882.1	GTTAAGGTTGTTTGGTAGTA	2	2	predicted	MTRNR2L2_-_79946830.23-ENST00000604882.1|MTRNR2L2_-_79946838.23-ENST00000604882.1
USP30	P1P2	significant	USP30_-_109490609.23-P1P2	GTGCCGAAGAGGCCGGGACC	1	1	empirical	USP30_+_109490393.23-P1P2	GACGACGGTTCCCGAGACAG	2	6	empirical	USP30_-_109490609.23-P1P2|USP30_+_109490393.23-P1P2
PRKCA	P1P2	nonessential	PRKCA_-_64298956.23-P1P2	GCCCCGGCGGAGGCAAGAGG	1	1	predicted	PRKCA_-_64298813.23-P1P2	Ggcaccagcccgactctccc	2	2	predicted	PRKCA_-_64298956.23-P1P2|PRKCA_-_64298813.23-P1P2
VN1R4	ENST00000311170.4	nonessential	VN1R4_-_53770577.23-ENST00000311170.4	GTCTTTAAGTTTTGCCCACC	1	1	predicted	VN1R4_+_53770922.23-ENST00000311170.4	GCATCAGTGACAGACATCAG	2	2	predicted	VN1R4_-_53770577.23-ENST00000311170.4|VN1R4_+_53770922.23-ENST00000311170.4
CYP21A2	P1P2	nonessential	CYP21A2_-_32006103.23-P1P2	GGGGAGGGTACCTGAAGGTG	1	1	predicted	CYP21A2_-_32006098.23-P1P2	GTCGGTGGGAGGGTACCTGA	2	2	predicted	CYP21A2_-_32006103.23-P1P2|CYP21A2_-_32006098.23-P1P2
ENDOD1	P1P2	nonessential	ENDOD1_+_94822990.23-P1P2	GTACGCAGCCGAGCAGGGTA	1	1	predicted	ENDOD1_-_94823095.23-P1P2	GCGCTCGCAGAGGCCGCCAT	2	2	predicted	ENDOD1_+_94822990.23-P1P2|ENDOD1_-_94823095.23-P1P2
FKBP4	P1P2	significant	FKBP4_+_2904174.23-P1P2	GCTGACTGCGGACCGCGAGG	1	1	empirical	FKBP4_+_2904557.23-P1P2	GGACGCAGCCCGGTCCGGGA	2	9	empirical	FKBP4_+_2904174.23-P1P2|FKBP4_+_2904557.23-P1P2
USO1	P1P2	significant	USO1_-_76649876.23-P1P2	GGCTGGAGTGGCCGCCGAGT	1	4	empirical	USO1_-_76649855.23-P1P2	GGGCTGTTTCCGGGCTTAGA	2	8	empirical	USO1_-_76649876.23-P1P2|USO1_-_76649855.23-P1P2
TIMELESS	P1P2	essential	TIMELESS_-_56842914.23-P1P2	GCCGGTGAGACCCGGGAACG	1	1	essential	TIMELESS_-_56842929.23-P1P2	GAACGCGGCGCGGGAGACTA	2	2	essential	TIMELESS_-_56842914.23-P1P2|TIMELESS_-_56842929.23-P1P2
RSPH3	P1P2	nonessential	RSPH3_+_159421170.23-P1P2	GCAGGGGCGTGTTATCGCGG	1	1	predicted	RSPH3_+_159421239.23-P1P2	GGCAGGAGCCGGGAGACACC	2	2	predicted	RSPH3_+_159421170.23-P1P2|RSPH3_+_159421239.23-P1P2
SPINK5	P1	nonessential	SPINK5_+_147443637.23-P1	GGTATGAGGCAAAGAGCCAA	1	1	predicted	SPINK5_+_147443579.23-P1	GGACGATGCAAGTCGCCTAC	2	2	predicted	SPINK5_+_147443637.23-P1|SPINK5_+_147443579.23-P1
INS-IGF2	P2	nonessential	INS-IGF2_+_2179514.23-P2	GCTCGCACGGGTAGAGACAG	1	1	predicted	INS-IGF2_-_2179564.23-P2	GGGCTGGGTGTTCCCATGGA	2	2	predicted	INS-IGF2_+_2179514.23-P2|INS-IGF2_-_2179564.23-P2
TRIM68	P1P2	nonessential	TRIM68_-_4629196.23-P1P2	GAGGTCCCCAGGACAGCGGG	1	1	predicted	TRIM68_+_4629376.23-P1P2	GCTGGGCCTCTGCCGCTCTC	2	2	predicted	TRIM68_-_4629196.23-P1P2|TRIM68_+_4629376.23-P1P2
ATXN1L	P1P2	nonessential	ATXN1L_-_71879902.23-P1P2	GTCCGGGCGCCCGGCTGTGG	1	1	predicted	ATXN1L_-_71879986.23-P1P2	GGGACGAGTGAGTGGATCCT	2	2	predicted	ATXN1L_-_71879902.23-P1P2|ATXN1L_-_71879986.23-P1P2
LRSAM1	P1P2	significant	LRSAM1_-_130213819.23-P1P2	GGGCGCCTGAGGCTGACGGC	1	5	empirical	LRSAM1_+_130214028.23-P1P2	GCAGGGGTCGCCGCGGTACT	2	2	empirical	LRSAM1_-_130213819.23-P1P2|LRSAM1_+_130214028.23-P1P2
ALKBH1	P1P2	nonessential	ALKBH1_+_78174341.23-P1P2	GGGGTATAGGCCGCGAGATG	1	1	predicted	ALKBH1_-_78174295.23-P1P2	GTCCGAAAGGCGTCCTCCCC	2	2	predicted	ALKBH1_+_78174341.23-P1P2|ALKBH1_-_78174295.23-P1P2
SYNC	P1P2	nonessential	SYNC_+_33168356.23-P1P2	GgccggccgggATCCGGTGT	1	1	predicted	SYNC_+_33168305.23-P1P2	Ggccggagcgaggggcccgc	2	2	predicted	SYNC_+_33168356.23-P1P2|SYNC_+_33168305.23-P1P2
TMOD3	P1P2	nonessential	TMOD3_-_52121890.23-P1P2	GCTACAGGGCGGTCGAGTGA	1	1	predicted	TMOD3_-_52121912.23-P1P2	GAGCTGCTGGCGGGTGGGTC	2	2	predicted	TMOD3_-_52121890.23-P1P2|TMOD3_-_52121912.23-P1P2
UNC13B	P1P2	nonessential	UNC13B_-_35162012.23-P1P2	GGAATGACGGGAGGGAGTCC	1	1	predicted	UNC13B_+_35162067.23-P1P2	GGGTAGCGGTGAGTACCGGC	2	2	predicted	UNC13B_-_35162012.23-P1P2|UNC13B_+_35162067.23-P1P2
ZNF302	P1P2	nonessential	ZNF302_-_35168629.23-P1P2	GGGCGGCGGCTTCCAAGCTA	1	1	predicted	ZNF302_+_35168664.23-P1P2	GGCTGGTGAGCGGGTAACGG	2	2	predicted	ZNF302_-_35168629.23-P1P2|ZNF302_+_35168664.23-P1P2
ZNF705D	ENST00000400085.3	nonessential	ZNF705D_-_11961942.23-ENST00000400085.3	GTCATTCTTTTACCCTATTG	1	1	predicted	ZNF705D_+_11962108.23-ENST00000400085.3	GATCTAACATCTGAAAATCA	2	2	predicted	ZNF705D_-_11961942.23-ENST00000400085.3|ZNF705D_+_11962108.23-ENST00000400085.3
LCN6	P2	significant	LCN6_-_139640412.23-P2	GACTCAGGGTCAAGACCCCG	1	1	predicted	LCN6_+_139640456.23-P2	GGAAGCTCTGGCCTCACTGC	2	2	predicted	LCN6_-_139640412.23-P2|LCN6_+_139640456.23-P2
MARK1	P1P2	nonessential	MARK1_+_220701558.23-P1P2	GCCGCCGCCGCGCCTCAGTC	1	1	predicted	MARK1_-_220701789.23-P1P2	GCGAGCCAGGCAGTGATTTG	2	2	predicted	MARK1_+_220701558.23-P1P2|MARK1_-_220701789.23-P1P2
IMPDH2	P1P2	essential	IMPDH2_+_49066798.23-P1P2	GGGTCCTCGGAGACACGCGG	1	1	essential	IMPDH2_+_49066801.23-P1P2	GCGCGGTCCTCGGAGACACG	2	3	essential	IMPDH2_+_49066798.23-P1P2|IMPDH2_+_49066801.23-P1P2
PFKFB2	P1P2	nonessential	PFKFB2_-_207226662.23-P1P2	GCTCGGTTCGGTCGCGTTAC	1	1	predicted	PFKFB2_-_207226710.23-P1P2	GGGATCTTAGGAGAGATCGT	2	2	predicted	PFKFB2_-_207226662.23-P1P2|PFKFB2_-_207226710.23-P1P2
TRIAP1	P1P2	significant	TRIAP1_+_120884159.23-P1P2	GGTCGCCATGAACAGTGTGG	1	3	empirical	TRIAP1_-_120884014.23-P1P2	GATGCAGGGCCTGGGAACAG	2	9	empirical	TRIAP1_+_120884159.23-P1P2|TRIAP1_-_120884014.23-P1P2
MEA1	P1P2	nonessential	MEA1_+_42981613.23-P1P2	GGTGAGGCGCGCGGGAACAC	1	1	predicted	MEA1_+_42981635.23-P1P2	GGGAGGCCGCGGGCTCTGAG	2	2	predicted	MEA1_+_42981613.23-P1P2|MEA1_+_42981635.23-P1P2
IER3IP1	P1P2	significant	IER3IP1_+_44702468.23-P1P2	GGCCGCGTGAGGGGACACCA	1	5	empirical	IER3IP1_+_44702730.23-P1P2	GGGGCCCCATCGGCTTCCGT	2	1	empirical	IER3IP1_+_44702468.23-P1P2|IER3IP1_+_44702730.23-P1P2
STX8	P1P2	nonessential	STX8_+_9479142.23-P1P2	GAGAGCAGGAAGAGTCCGAG	1	1	predicted	STX8_-_9479112.23-P1P2	GCCTCACCCGGGACTCACCA	2	2	predicted	STX8_+_9479142.23-P1P2|STX8_-_9479112.23-P1P2
TPBGL	P1P2	nonessential	TPBGL_-_74951875.23-P1P2	GAGGCCGGCGCGCAGGGCGA	1	1	predicted	TPBGL_+_74951899.23-P1P2	GGGGCAAGAGGGGTCAGACG	2	2	predicted	TPBGL_-_74951875.23-P1P2|TPBGL_+_74951899.23-P1P2
MEGF10	P1P2	nonessential	MEGF10_+_126626743.23-P1P2	GGTTTGCCCAACTCTTACCC	1	1	predicted	MEGF10_-_126626553.23-P1P2	GTGCGCAAAACTGGGCGACT	2	2	predicted	MEGF10_+_126626743.23-P1P2|MEGF10_-_126626553.23-P1P2
NMUR2	P1P2	nonessential	NMUR2_-_151784792.23-P1P2	GaaGCAGTCACGAAAGTCAC	1	1	predicted	NMUR2_-_151784811.23-P1P2	GAGGCTTCGTAAGGAAGGCT	2	2	predicted	NMUR2_-_151784792.23-P1P2|NMUR2_-_151784811.23-P1P2
RGMB	P1	nonessential	RGMB_+_98109413.23-P1	GGCGGGCGTGGACCTCCAAG	1	1	predicted	RGMB_+_98109384.23-P1	GAGCCCTAGCGACCACCCAC	2	2	predicted	RGMB_+_98109413.23-P1|RGMB_+_98109384.23-P1
CDRT15	P1P2	nonessential	CDRT15_+_14139882.23-P1P2	GGAGGCACAGACACTTGGTG	1	1	predicted	CDRT15_+_14139839.23-P1P2	GTTGCGGGGGCGGTGATTTT	2	2	predicted	CDRT15_+_14139882.23-P1P2|CDRT15_+_14139839.23-P1P2
PPM1G	P2	significant	PPM1G_-_27607633.23-P2	GACTCGAGGCAGCTTGTCAG	1	1	predicted	PPM1G_-_27607619.23-P2	GACTTGGACTTAGCAACTCG	2	2	predicted	PPM1G_-_27607633.23-P2|PPM1G_-_27607619.23-P2
KYNU	P1P2	nonessential	KYNU_-_143635275.23-P1P2	GAGGTTCTTGGAGAGATTCT	1	1	predicted	KYNU_+_143635278.23-P1P2	GAGGATCCCAATGGAGTGTT	2	2	predicted	KYNU_-_143635275.23-P1P2|KYNU_+_143635278.23-P1P2
TAS2R40	ENST00000408947.3	nonessential	TAS2R40_-_142919180.23-ENST00000408947.3	GGGATCAAAGAGAATGGCAA	1	1	predicted	TAS2R40_+_142919329.23-ENST00000408947.3	GCATAATGCGGTCACCAGTG	2	2	predicted	TAS2R40_-_142919180.23-ENST00000408947.3|TAS2R40_+_142919329.23-ENST00000408947.3
IFRD1	P2	nonessential	IFRD1_+_112063264.23-P2	GGGAATTACACACATCCCTC	1	1	predicted	IFRD1_-_112063242.23-P2	GCTGGCTCCTGGTTCATTCA	2	2	predicted	IFRD1_+_112063264.23-P2|IFRD1_-_112063242.23-P2
MUC8	P1P2	nonessential	MUC8_+_133051126.23-P1P2	GTGATCCCGCAGCGACTCTG	1	1	predicted	MUC8_-_133051153.23-P1P2	GAGTCGCTGCGGGATCACTT	2	2	predicted	MUC8_+_133051126.23-P1P2|MUC8_-_133051153.23-P1P2
PTPN22	P1P2	nonessential	PTPN22_-_114414151.23-P1P2	GCCCTGAGAGGGTCACATAC	1	1	predicted	PTPN22_-_114414171.23-P1P2	GGGACTCACCAGAAATTCAT	2	2	predicted	PTPN22_-_114414151.23-P1P2|PTPN22_-_114414171.23-P1P2
TMEM220	P1P2	nonessential	TMEM220_+_10633303.23-P1P2	GCCGGGCGGAGCGACGGCCA	1	1	predicted	TMEM220_+_10633275.23-P1P2	GCCCCAAGGCACCGAAACCG	2	2	predicted	TMEM220_+_10633303.23-P1P2|TMEM220_+_10633275.23-P1P2
CBR4	P1P2	nonessential	CBR4_+_169931109.23-P1P2	GAAGGGGCCAAAGCCGCCGC	1	1	predicted	CBR4_+_169931374.23-P1P2	GGGCTGCAGGAGGTGTCGAG	2	2	predicted	CBR4_+_169931109.23-P1P2|CBR4_+_169931374.23-P1P2
UGT2B4	P1P2	significant	UGT2B4_+_70361155.23-P1P2	GAAACTTATGAAGAAACTAC	1	9	empirical	UGT2B4_-_70361397.23-P1P2	GCTGTTGGGATCGAAAGAAA	1	1	predicted	UGT2B4_+_70361155.23-P1P2|UGT2B4_-_70361397.23-P1P2
HBA2	P2	nonessential	HBA2_-_222868.23-P2	GTAAACCCTGGCGCGCTCGC	1	1	predicted	HBA2_-_222872.23-P2	GCCCTGGCGCGCTCGCGGGC	2	2	predicted	HBA2_-_222868.23-P2|HBA2_-_222872.23-P2
REV3L	P1P2	significant	REV3L_+_111804354.23-P1P2	GGAGCCCGTGTGATTCCCGG	1	2	empirical	REV3L_-_111804372.23-P1P2	GCCACCGCCGGGAATCACAC	2	1	empirical	REV3L_+_111804354.23-P1P2|REV3L_-_111804372.23-P1P2
WDR31	P1P2	nonessential	WDR31_-_116102502.23-P1P2	GAGGCTCAGTACCCACCGGT	1	1	predicted	WDR31_-_116102498.23-P1P2	GCCTCAGGCTCAGTACCCAC	2	2	predicted	WDR31_-_116102502.23-P1P2|WDR31_-_116102498.23-P1P2
ZNF189	P1P2	nonessential	ZNF189_-_104161203.23-P1P2	GGGCTCTAGCGAGGCCTGAA	1	1	predicted	ZNF189_-_104161228.23-P1P2	GCGTAACCAGGCAGGAGTAG	2	2	predicted	ZNF189_-_104161203.23-P1P2|ZNF189_-_104161228.23-P1P2
SLX1A	ENST00000251303.6	nonessential	SLX1A_+_30205279.23-ENST00000251303.6	GGCTCTCGGGGACTATCCGG	1	1	predicted	SLX1A_-_30205256.23-ENST00000251303.6	GACAGGAGAGGGGCACGTAC	2	2	predicted	SLX1A_+_30205279.23-ENST00000251303.6|SLX1A_-_30205256.23-ENST00000251303.6
MSMP	P1P2	nonessential	MSMP_-_35754033.23-P1P2	GGCACTTGCTGTAGACTCCT	1	1	predicted	MSMP_+_35753985.23-P1P2	GCCAAGCTCAAGGTAAAGTG	3	3	predicted	MSMP_-_35754033.23-P1P2|MSMP_+_35753985.23-P1P2
FRMD1	P2	nonessential	FRMD1_+_168468023.23-P2	GTAAGTGTAGAGTGTCGGGT	1	1	predicted	FRMD1_+_168467974.23-P2	GCTGGGCCACGGGGACACGT	2	2	predicted	FRMD1_+_168468023.23-P2|FRMD1_+_168467974.23-P2
HSPB1	P2	nonessential	HSPB1_+_75933108.23-P2	GCCTCGTGCTTGCCTTTGGG	1	1	predicted	HSPB1_+_75933087.23-P2	GGAAGAGGGAAATCAGACTG	2	2	predicted	HSPB1_+_75933108.23-P2|HSPB1_+_75933087.23-P2
A2M	P1P2	nonessential	A2M_+_9268487.23-P1P2	GAGATGGATTGTAGGGAGTA	1	1	predicted	A2M_+_9268495.23-P1P2	GTTGGGACCAGATGGATTGT	2	2	predicted	A2M_+_9268487.23-P1P2|A2M_+_9268495.23-P1P2
SIM2	P1P2	nonessential	SIM2_-_38071478.23-P1P2	GGCGCCTAGCCACACATCGC	1	1	predicted	SIM2_-_38071452.23-P1P2	GGGCCGCACGTGGACAGCGG	2	2	predicted	SIM2_-_38071478.23-P1P2|SIM2_-_38071452.23-P1P2
PARVB	P1P2	nonessential	PARVB_+_44420216.23-P1P2	GAGCGCGGCGCGGAGGACAT	1	1	predicted	PARVB_-_44420173.23-P1P2	GGCCTCTCCCCGGGGCGACC	2	2	predicted	PARVB_+_44420216.23-P1P2|PARVB_-_44420173.23-P1P2
TONSL	P1P2	significant	TONSL_-_145669773.23-P1P2	GGGGGTCCCCGAGGAACTTA	1	3	empirical	TONSL_-_145669819.23-P1P2	GCTCGGATCGCCGCGGGATC	2	1	empirical	TONSL_-_145669773.23-P1P2|TONSL_-_145669819.23-P1P2
HMOX2	P2	nonessential	HMOX2_-_4524797.23-P2	GGATGCTACGGGTGATGACT	1	1	predicted	HMOX2_-_4524776.23-P2	GAGGTGGAGAGCCTCTTAAC	2	2	predicted	HMOX2_-_4524797.23-P2|HMOX2_-_4524776.23-P2
LRRC42	P1P2	nonessential	LRRC42_-_54412279.23-P1P2	Gcccgggttgcgtgtgggag	1	1	predicted	LRRC42_+_54411904.23-P1P2	GGTTTGGAACTCGCAGAGGT	2	2	predicted	LRRC42_-_54412279.23-P1P2|LRRC42_+_54411904.23-P1P2
ELAVL2	P2	significant	ELAVL2_+_23821788.23-P2	GGGCAGTAGCCGGCCGGGTG	1	1	predicted	ELAVL2_+_23821784.23-P2	GGTAGCCGGCCGGGTGAGGA	2	2	predicted	ELAVL2_+_23821788.23-P2|ELAVL2_+_23821784.23-P2
MGAT2	P1P2	nonessential	MGAT2_+_50087545.23-P1P2	GACGCGGCCTCGCCTCACTC	1	1	predicted	MGAT2_-_50087538.23-P1P2	GCAGTTGCGGGTTGTCATAA	2	2	predicted	MGAT2_+_50087545.23-P1P2|MGAT2_-_50087538.23-P1P2
RGPD3	P1P2	nonessential	RGPD3_+_107084762.23-P1P2	GCGCTGGTCTCACGCATCTC	1	1	predicted	RGPD3_+_107084831.23-P1P2	GGGCTACGCCGCTGCCTCAG	2	2	predicted	RGPD3_+_107084762.23-P1P2|RGPD3_+_107084831.23-P1P2
SPTBN2	P1P2	nonessential	SPTBN2_+_66496373.23-P1P2	GAAGGAGGACGCGAGAGCGA	1	1	predicted	SPTBN2_-_66496651.23-P1P2	GGGTCCAAGGTCCTTAACCA	2	2	predicted	SPTBN2_+_66496373.23-P1P2|SPTBN2_-_66496651.23-P1P2
STRADA	P1P2	significant	STRADA_+_61819143.23-P1P2	GCGCGGCAGTAAAACTGAGG	1	3	empirical	STRADA_+_61819123.23-P1P2	GGGCGGAGCCAAGACGGTCG	2	2	empirical	STRADA_+_61819143.23-P1P2|STRADA_+_61819123.23-P1P2
ACOT4	P1P2	nonessential	ACOT4_+_74058647.23-P1P2	GTGACATCTTGGAGCCGGAG	1	1	predicted	ACOT4_+_74058635.23-P1P2	GGCCGGAGCGGGGAATTCAA	2	2	predicted	ACOT4_+_74058647.23-P1P2|ACOT4_+_74058635.23-P1P2
CORO7-PAM16	P1P2	nonessential	CORO7-PAM16_-_4466376.23-P1P2	GGGTTCCAGACGGCCCTGGA	1	1	predicted	CORO7-PAM16_-_4466535.23-P1P2	GTTCATGGCGACGGGCACGG	2	2	predicted	CORO7-PAM16_-_4466376.23-P1P2|CORO7-PAM16_-_4466535.23-P1P2
C19orf18	P1P2	nonessential	C19orf18_+_58485465.23-P1P2	GGGGCTGCCTCGAGATCCAC	1	1	predicted	C19orf18_-_58485480.23-P1P2	GGACTCACCCGTGGATCTCG	2	2	predicted	C19orf18_+_58485465.23-P1P2|C19orf18_-_58485480.23-P1P2
OLFML1	P1P2	nonessential	OLFML1_-_7506824.23-P1P2	GGAGGGTCCGCATGTGTCAA	1	1	predicted	OLFML1_+_7506772.23-P1P2	GGTGGTTGCAAGCTGCTTCC	2	2	predicted	OLFML1_-_7506824.23-P1P2|OLFML1_+_7506772.23-P1P2
TNNI2	P1	nonessential	TNNI2_+_1860251.23-P1	GTGGGCCTCACCTAGAATCT	1	1	predicted	TNNI2_+_1860222.23-P1	GGCTGGGAGCGAGGTCAGGC	2	2	predicted	TNNI2_+_1860251.23-P1|TNNI2_+_1860222.23-P1
EBPL	P1P2	nonessential	EBPL_+_50265555.23-P1P2	GCGTCGGAAGCCTGAAGCAT	1	1	predicted	EBPL_+_50265571.23-P1P2	GGGTCCTGGGCCGTTGGCGT	2	2	predicted	EBPL_+_50265555.23-P1P2|EBPL_+_50265571.23-P1P2
NAA20	P1P2	significant	NAA20_-_19998023.23-P1P2	GGGTCTTGGCGAACGGTCTT	1	1	empirical	NAA20_-_19998029.23-P1P2	GGGCGAACGGTCTTCGGAAG	2	6	empirical	NAA20_-_19998023.23-P1P2|NAA20_-_19998029.23-P1P2
CRYGB	P1P2	nonessential	CRYGB_+_209010823.23-P1P2	GAATGGGAAAGGTAAGTCCT	1	1	predicted	CRYGB_+_209010777.23-P1P2	GAATGCAGTGGCCTCAGTGG	2	2	predicted	CRYGB_+_209010823.23-P1P2|CRYGB_+_209010777.23-P1P2
COLGALT1	P1P2	nonessential	COLGALT1_+_17666723.23-P1P2	GCGAGTGCGCCCAGCGTGGT	2	2	predicted	COLGALT1_+_17666712.23-P1P2	GAGCGTGGTGGGCAACGCGT	3	3	predicted	COLGALT1_+_17666723.23-P1P2|COLGALT1_+_17666712.23-P1P2
IGLON5	P1P2	significant	IGLON5_+_51815316.23-P1P2	GGGAATGCAGACCCCACCCC	1	1	empirical	IGLON5_+_51814910.23-P1P2	GGCTGCTGCAGACCCGGGGA	2	1	empirical	IGLON5_+_51815316.23-P1P2|IGLON5_+_51814910.23-P1P2
ZIC3	P1P2	nonessential	ZIC3_+_136648661.23-P1P2	GCTCCTGCAgagggatagga	1	1	predicted	ZIC3_+_136648665.23-P1P2	GGAGTCTCCTGCAgagggat	2	2	predicted	ZIC3_+_136648661.23-P1P2|ZIC3_+_136648665.23-P1P2
GADD45G	P1P2	nonessential	GADD45G_+_92219986.23-P1P2	GACAAGCGGAGAGCGCGGAG	1	1	predicted	GADD45G_-_92219943.23-P1P2	GGGGCGCACTCGCTGGTGGT	2	2	predicted	GADD45G_+_92219986.23-P1P2|GADD45G_-_92219943.23-P1P2
ATP5F1	P1P2	essential	ATP5F1_+_111992112.23-P1P2	GGCGTCCCTGTGACCCCGAT	1	4	essential	ATP5F1_-_111992129.23-P1P2	GTTCTCCTATCGGGGTCACA	2	5	essential	ATP5F1_+_111992112.23-P1P2|ATP5F1_-_111992129.23-P1P2
ZNF423	ENST00000262383.2	nonessential	ZNF423_-_49860880.23-ENST00000262383.2	GAGGGTCCCCGCTGCAACAG	1	1	predicted	ZNF423_+_49860850.23-ENST00000262383.2	GCAGCGGGGACCCTCCTTTC	2	2	predicted	ZNF423_-_49860880.23-ENST00000262383.2|ZNF423_+_49860850.23-ENST00000262383.2
SYNPO2L	P1	nonessential	SYNPO2L_-_75415739.23-P1	GGTCCCCAGGAGAGAAGTTG	1	1	predicted	SYNPO2L_+_75415748.23-P1	GCGGACAGGAAGCCCAGACG	2	2	predicted	SYNPO2L_-_75415739.23-P1|SYNPO2L_+_75415748.23-P1
ZSCAN30	P1P2	nonessential	ZSCAN30_-_32870157.23-P1P2	GCCAAGCAGGTCCCTGGCTA	1	1	predicted	ZSCAN30_-_32870168.23-P1P2	GCCTGGCTAAGGCACTGCTA	2	2	predicted	ZSCAN30_-_32870157.23-P1P2|ZSCAN30_-_32870168.23-P1P2
ZEB1	P1	significant	ZEB1_-_31608166.23-P1	GGACACAAGCGAGAGGATCA	1	3	empirical	ZEB1_-_31608169.23-P1	GACAAGCGAGAGGATCATGG	2	2	empirical	ZEB1_-_31608166.23-P1|ZEB1_-_31608169.23-P1
ARPC5L	P2	nonessential	ARPC5L_-_127624450.23-P2	GGAGGTCGGCGTCACGGTGT	1	1	predicted	ARPC5L_+_127624418.23-P2	GACGCCGACCTCGCTATCAG	2	2	predicted	ARPC5L_-_127624450.23-P2|ARPC5L_+_127624418.23-P2
SNX13	P1P2	nonessential	SNX13_+_17979892.23-P1P2	GTAACTGAGGTAAGCGGCGA	1	1	predicted	SNX13_+_17980000.23-P1P2	GGAGCAGTTGCCGCCGTTGG	2	2	predicted	SNX13_+_17979892.23-P1P2|SNX13_+_17980000.23-P1P2
ATP5C1	P1P2	significant	ATP5C1_-_7830158.23-P1P2	GGCCTGACCGACCTTCAGCA	1	4	empirical	ATP5C1_+_7830168.23-P1P2	GACACCCGCGCGAGAGAACA	2	2	empirical	ATP5C1_-_7830158.23-P1P2|ATP5C1_+_7830168.23-P1P2
EMC7	P1P2	significant	EMC7_+_34394068.23-P1P2	GGAGACTGGGAGGGCTTCCG	1	3	empirical	EMC7_-_34393868.23-P1P2	GCCGCCGAGATCCAGTCCTG	2	6	empirical	EMC7_+_34394068.23-P1P2|EMC7_-_34393868.23-P1P2
ZSWIM3	P1P2	nonessential	ZSWIM3_+_44486286.23-P1P2	GAGGAACCCTAGGCCTGACC	1	1	predicted	ZSWIM3_-_44486302.23-P1P2	GTGTAACCCGGTCAGGCCTA	2	2	predicted	ZSWIM3_+_44486286.23-P1P2|ZSWIM3_-_44486302.23-P1P2
ROBO4	P1P2	nonessential	ROBO4_+_124767704.23-P1P2	GGTGCTCGGGACAAGGACAT	1	1	predicted	ROBO4_+_124767686.23-P1P2	GTAGGGCTGAGAGTAGCCAT	2	2	predicted	ROBO4_+_124767704.23-P1P2|ROBO4_+_124767686.23-P1P2
LRIG3	P1P2	nonessential	LRIG3_+_59314029.23-P1P2	GGAGCTTCGGGTAGAGACCT	1	1	predicted	LRIG3_+_59313927.23-P1P2	GGCGCTGGCCGGTCAGACAG	2	2	predicted	LRIG3_+_59314029.23-P1P2|LRIG3_+_59313927.23-P1P2
RNPEP	P1P2	nonessential	RNPEP_-_201951819.23-P1P2	GCGAGCGGCGAGCATTcccc	1	1	predicted	RNPEP_-_201951783.23-P1P2	GCGGCCCGGCCGGTGAGCAA	2	2	predicted	RNPEP_-_201951819.23-P1P2|RNPEP_-_201951783.23-P1P2
NDC1	P1P2	significant	NDC1_-_54303966.23-P1P2	GCCCCTAGTCTAGGGCGTAC	1	5	empirical	NDC1_+_54303930.23-P1P2	GCTAGGGGCCGCCATCTCCA	2	3	empirical	NDC1_-_54303966.23-P1P2|NDC1_+_54303930.23-P1P2
POLR1B	P1P2	essential	POLR1B_-_113300081.23-P1P2	GCAGGTGGCCACATGGATCC	1	1	essential	POLR1B_+_113300085.23-P1P2	GGCTGGGCAGGTTCCGCCAC	2	3	essential	POLR1B_-_113300081.23-P1P2|POLR1B_+_113300085.23-P1P2
TMEM68	P1P2	nonessential	TMEM68_-_56685856.23-P1P2	GGGCGACAGAAGCTCTTCGG	1	1	predicted	TMEM68_-_56685873.23-P1P2	GGGGGGATCAGTGGCCAAGG	2	2	predicted	TMEM68_-_56685856.23-P1P2|TMEM68_-_56685873.23-P1P2
ATXN7L3	P1P2	significant	ATXN7L3_+_42277462.23-P1P2	GAGCAAATGCTGCCGAGCTG	1	1	empirical	ATXN7L3_-_42277461.23-P1P2	GAGCGCGTGCATCTGCCCCG	2	2	empirical	ATXN7L3_+_42277462.23-P1P2|ATXN7L3_-_42277461.23-P1P2
FRMD4B	ENST00000398540.3	nonessential	FRMD4B_-_69435340.23-ENST00000398540.3	GTTGGGTGCCCGCCAGCCAA	1	1	predicted	FRMD4B_+_69435141.23-ENST00000398540.3	GGGGTTCAGAGCGAAGGAGG	2	2	predicted	FRMD4B_-_69435340.23-ENST00000398540.3|FRMD4B_+_69435141.23-ENST00000398540.3
RAP1GAP	P1	nonessential	RAP1GAP_-_21995752.23-P1	GGCGGGGCGCACTCACCCAA	1	1	predicted	RAP1GAP_+_21995838.23-P1	GCCCCCTCCCCGAACTGCGG	2	2	predicted	RAP1GAP_-_21995752.23-P1|RAP1GAP_+_21995838.23-P1
CHUK	P1P2	significant	CHUK_-_101989295.23-P1P2	GcgggggccgcTCCATGGGG	1	2	empirical	CHUK_-_101989292.23-P1P2	GccccgggggccgcTCCATG	2	3	empirical	CHUK_-_101989295.23-P1P2|CHUK_-_101989292.23-P1P2
AK7	P1P2	nonessential	AK7_+_96858485.23-P1P2	GCCTCTTCTTCAGCCATGGT	1	1	predicted	AK7_-_96858538.23-P1P2	GTCTCACGGAGAAGGTTATC	2	2	predicted	AK7_+_96858485.23-P1P2|AK7_-_96858538.23-P1P2
EXOSC7	P1P2	significant	EXOSC7_-_45017818.23-P1P2	GAGAAGGTGTACATCGTGCA	1	2	empirical	EXOSC7_-_45017841.23-P1P2	GGTCCAGGTAGCTACAGCAG	2	5	empirical	EXOSC7_-_45017818.23-P1P2|EXOSC7_-_45017841.23-P1P2
HTR6	P1P2	significant	HTR6_+_19991408.23-P1P2	GCGGGTCTCCCGAGCCCGGG	1	1	empirical	HTR6_+_19991854.23-P1P2	GGGGCGGCAAGATAGGGGAG	2	10	empirical	HTR6_+_19991408.23-P1P2|HTR6_+_19991854.23-P1P2
CLDN2	P1	nonessential	CLDN2_-_106171353.23-P1	GAGGAGGAGAGAAGTCAGCC	1	1	predicted	CLDN2_-_106171337.23-P1	GCCCACAGACACTTGTAAGG	2	2	predicted	CLDN2_-_106171353.23-P1|CLDN2_-_106171337.23-P1
MAGEB5	ENST00000379029.2	nonessential	MAGEB5_-_26235478.23-ENST00000379029.2	GAGGGCTAACAGTAGAGATG	1	1	predicted	MAGEB5_-_26235499.23-ENST00000379029.2	GGAGTACCCATGTTCCTCAG	2	2	predicted	MAGEB5_-_26235478.23-ENST00000379029.2|MAGEB5_-_26235499.23-ENST00000379029.2
NRL	P1	nonessential	NRL_-_24553805.23-P1	GCAGGAGACTGAAGGCTCCA	1	1	predicted	NRL_-_24553630.23-P1	GGGAGTGGAGTAGGGTACCA	2	2	predicted	NRL_-_24553805.23-P1|NRL_-_24553630.23-P1
PAFAH1B2	P1P2	nonessential	PAFAH1B2_-_117015061.23-P1P2	GGCGCCGGAGCGGGACCGAC	1	1	predicted	PAFAH1B2_+_117015054.23-P1P2	GGTCGCTCGCTCGGTCCCGT	2	2	predicted	PAFAH1B2_-_117015061.23-P1P2|PAFAH1B2_+_117015054.23-P1P2
AKR1C1	P1P2	nonessential	AKR1C1_+_5005615.23-P1P2	GTTTCTGTCACTAGCCTGGC	1	1	predicted	AKR1C1_+_5005619.23-P1P2	GTCCATTTCTGTCACTAGCC	2	2	predicted	AKR1C1_+_5005615.23-P1P2|AKR1C1_+_5005619.23-P1P2
COPE	P1P2	nonessential	COPE_+_19030144.23-P1P2	GGACAGCGAAATGGCGCCTC	1	1	predicted	COPE_-_19030119.23-P1P2	GAACAGCTCGTCTACCTCCC	2	2	predicted	COPE_+_19030144.23-P1P2|COPE_-_19030119.23-P1P2
DYNLL1	P1P2	significant	DYNLL1_-_120934043.23-P1P2	GAGAAACTCGGGGGGCCAGG	1	2	empirical	DYNLL1_-_120933933.23-P1P2	GCTTAGATGCGCCACGGTTT	2	1	empirical	DYNLL1_-_120934043.23-P1P2|DYNLL1_-_120933933.23-P1P2
OR4M2	ENST00000332663.2	nonessential	OR4M2_-_22368503.23-ENST00000332663.2	GAAAGCAGTGATATAACTCT	1	1	predicted	OR4M2_-_22368641.23-ENST00000332663.2	GGGCCTATCCCAGACTCCAG	2	2	predicted	OR4M2_-_22368503.23-ENST00000332663.2|OR4M2_-_22368641.23-ENST00000332663.2
CAMK1G	P2	nonessential	CAMK1G_+_209781059.23-P2	Ggagactgaaaactccctaa	1	1	predicted	CAMK1G_-_209781067.23-P2	Ggacacagcccctaccctta	2	2	predicted	CAMK1G_+_209781059.23-P2|CAMK1G_-_209781067.23-P2
NYAP2	P1P2	nonessential	NYAP2_+_226265410.23-P1P2	GGAGGGCATAGCTAATGGGT	1	1	predicted	NYAP2_+_226265473.23-P1P2	GTGCTAGGAAGATGCAGTGG	2	2	predicted	NYAP2_+_226265410.23-P1P2|NYAP2_+_226265473.23-P1P2
PKDREJ	P1P2	nonessential	PKDREJ_-_46659198.23-P1P2	GCAGGCCCACGCCCAGAAGG	1	1	predicted	PKDREJ_-_46659206.23-P1P2	GCGCCCAGAAGGAGGAGAGC	2	2	predicted	PKDREJ_-_46659198.23-P1P2|PKDREJ_-_46659206.23-P1P2
ATP11B	P1P2	significant	ATP11B_+_182511382.23-P1P2	Ggcgccgcgtccccatcccg	1	6	empirical	ATP11B_-_182511533.23-P1P2	GgcgccccgcgggACCCGGA	2	7	empirical	ATP11B_+_182511382.23-P1P2|ATP11B_-_182511533.23-P1P2
REPS1	P1P2	nonessential	REPS1_+_139309337.23-P1P2	GGCCGGGGCACTGTAAATGG	1	1	predicted	REPS1_+_139309379.23-P1P2	GCGGCCGCCGCTGTCACTGT	2	2	predicted	REPS1_+_139309337.23-P1P2|REPS1_+_139309379.23-P1P2
SOX30	P1	nonessential	SOX30_+_157079335.23-P1	GAGTGCGGCGGCTCCTACCA	1	1	predicted	SOX30_-_157079344.23-P1	GTCGAATCACCTGCCATGGT	2	2	predicted	SOX30_+_157079335.23-P1|SOX30_-_157079344.23-P1
ZNF581	P1	nonessential	ZNF581_+_56155029.23-P1	GGGTGTGCCCCAGGAACTGG	1	1	predicted	ZNF581_+_56155049.23-P1	GCGGCGAGAAGGGGACCTCT	2	2	predicted	ZNF581_+_56155029.23-P1|ZNF581_+_56155049.23-P1
BZRAP1	P1P2	nonessential	BZRAP1_+_56406114.23-P1P2	GCTCGGAGCCCACCATCTCG	1	1	predicted	BZRAP1_-_56406128.23-P1P2	GCCAGGAGCCTCGAGATGGT	2	2	predicted	BZRAP1_+_56406114.23-P1P2|BZRAP1_-_56406128.23-P1P2
OR1I1	ENST00000209540.2	nonessential	OR1I1_+_15197855.23-ENST00000209540.2	GTGTATGGTCTGTGACTAGT	1	1	predicted	OR1I1_+_15197845.23-ENST00000209540.2	GGTGACTAGTGGGAACAAAA	2	2	predicted	OR1I1_+_15197855.23-ENST00000209540.2|OR1I1_+_15197845.23-ENST00000209540.2
DNAL4	P1	nonessential	DNAL4_+_39190171.23-P1	GCAACGTCCGGTGAGGGGGC	1	1	predicted	DNAL4_+_39190071.23-P1	GCTCCGGCCCCCGCAGGAGC	2	2	predicted	DNAL4_+_39190171.23-P1|DNAL4_+_39190071.23-P1
NDUFC2	P1P2	significant	NDUFC2_+_77790689.23-P1P2	GACCCGCGGCTCCTCTACAT	1	8	empirical	NDUFC2_+_77790703.23-P1P2	GGCCCAAGCTGACCGACCCG	2	7	empirical	NDUFC2_+_77790689.23-P1P2|NDUFC2_+_77790703.23-P1P2
SOD1	P1P2	significant	SOD1_+_33032480.23-P1P2	GAGGCACCACGACAGACCCG	1	7	empirical	SOD1_+_33032477.23-P1P2	GCACCACGACAGACCCGCGG	2	6	empirical	SOD1_+_33032480.23-P1P2|SOD1_+_33032477.23-P1P2
WDR96	P1P2	nonessential	WDR96_-_105992054.23-P1P2	GCAGCGCACGCAGCACCCCA	1	1	predicted	WDR96_+_105992047.23-P1P2	GAGGTAACCGACCCGCCCTG	2	2	predicted	WDR96_-_105992054.23-P1P2|WDR96_+_105992047.23-P1P2
PPP1R14C	P1P2	significant	PPP1R14C_+_150464221.23-P1P2	GCCGCATGCGAAGGGCTCCC	1	1	predicted	PPP1R14C_+_150464229.23-P1P2	GCCCGGCAGCCGCATGCGAA	2	2	predicted	PPP1R14C_+_150464221.23-P1P2|PPP1R14C_+_150464229.23-P1P2
MRPL53	P1P2	significant	MRPL53_-_74699602.23-P1P2	GCGTCTGCAGGAAGGTCCTA	1	2	empirical	MRPL53_-_74699616.23-P1P2	GTCCTACGGTGGAAAAACAG	2	5	empirical	MRPL53_-_74699602.23-P1P2|MRPL53_-_74699616.23-P1P2
TCHHL1	P1P2	nonessential	TCHHL1_-_152061528.23-P1P2	GCGAGAGCAGGTAGAACGTG	1	1	predicted	TCHHL1_+_152061466.23-P1P2	GCATCTGCTTGAGCATACTT	2	2	predicted	TCHHL1_-_152061528.23-P1P2|TCHHL1_+_152061466.23-P1P2
RNF186	P1P2	nonessential	RNF186_-_20141458.23-P1P2	GGCAACCGGGGACAGCTGTA	1	1	predicted	RNF186_+_20141688.23-P1P2	GCTGGCCAGAGTGAAAAGGA	2	2	predicted	RNF186_-_20141458.23-P1P2|RNF186_+_20141688.23-P1P2
AXL	P1P2	significant	AXL_-_41725322.23-P1P2	GCGTGGCGGTGCCCCAGGAT	1	4	empirical	AXL_-_41725592.23-P1P2	Ggactgagagaggaactgaa	2	9	empirical	AXL_-_41725322.23-P1P2|AXL_-_41725592.23-P1P2
CREBZF	P1P2	nonessential	CREBZF_-_85376117.23-P1P2	GGAGGGACGGGAGAACGAAG	1	1	predicted	CREBZF_-_85376158.23-P1P2	GGACCGCGCCACCCAGACAA	2	2	predicted	CREBZF_-_85376117.23-P1P2|CREBZF_-_85376158.23-P1P2
HSPA4L	P1P2	nonessential	HSPA4L_-_128703482.23-P1P2	GAGGCGGCCGAACCGCAGTA	1	1	predicted	HSPA4L_+_128703540.23-P1P2	GGCAGGGAGTCGGAAACCCG	2	2	predicted	HSPA4L_-_128703482.23-P1P2|HSPA4L_+_128703540.23-P1P2
OR2T4	ENST00000366475.1	nonessential	OR2T4_-_248524983.23-ENST00000366475.1	GTCCAATGGCCAATATCACC	1	1	predicted	OR2T4_+_248524970.23-ENST00000366475.1	GTTGGCCATCCAGGTGATAT	2	2	predicted	OR2T4_-_248524983.23-ENST00000366475.1|OR2T4_+_248524970.23-ENST00000366475.1
CCNE2	P1P2	significant	CCNE2_-_95907205.23-P1P2	GGAGAAGCCCCTAGAATGAG	1	7	empirical	CCNE2_+_95907328.23-P1P2	GCCGATCACTTACCACAGGC	2	2	empirical	CCNE2_-_95907205.23-P1P2|CCNE2_+_95907328.23-P1P2
SLC4A9	P1P2	nonessential	SLC4A9_-_139739797.23-P1P2	GTCAGAACCTAGGACTGTAC	1	1	predicted	SLC4A9_+_139739817.23-P1P2	GTGGCAGCTTCATTTCCATG	2	2	predicted	SLC4A9_-_139739797.23-P1P2|SLC4A9_+_139739817.23-P1P2
MCM5	P1P2	significant	MCM5_-_35796550.23-P1P2	GGCGCTTCAAGGAGTTCCTG	1	4	empirical	MCM5_-_35796201.23-P1P2	GGTGAAGTGCGGAAAACCAG	2	2	empirical	MCM5_-_35796550.23-P1P2|MCM5_-_35796201.23-P1P2
PRSS33	ENST00000293851.5	nonessential	PRSS33_+_2836673.23-ENST00000293851.5	GGACAGAAGGACCACGGAGG	1	1	predicted	PRSS33_+_2836676.23-ENST00000293851.5	GACAGACAGAAGGACCACGG	2	2	predicted	PRSS33_+_2836673.23-ENST00000293851.5|PRSS33_+_2836676.23-ENST00000293851.5
L3HYPDH	P1P2	nonessential	L3HYPDH_-_59951003.23-P1P2	GGCGTCCCTGGATCATGCGG	1	1	predicted	L3HYPDH_+_59951030.23-P1P2	GTCTCCCCCGACGCAGACCA	3	3	predicted	L3HYPDH_-_59951003.23-P1P2|L3HYPDH_+_59951030.23-P1P2
DEFB103A	P1P2	nonessential	DEFB103A_-_7738948.23-P1P2	GGTGAAGCCTAGCAGCTATG	1	1	predicted	DEFB103A_+_7738978.23-P1P2	GTGGAACAGGCACCAAAAAC	2	2	predicted	DEFB103A_-_7738948.23-P1P2|DEFB103A_+_7738978.23-P1P2
LGALS16	P1P2	nonessential	LGALS16_-_40146597.23-P1P2	GGAAGGTCGCCCAGAAGGAG	1	1	predicted	LGALS16_-_40146580.23-P1P2	GAGACTGGACACAATTCCGA	2	2	predicted	LGALS16_-_40146597.23-P1P2|LGALS16_-_40146580.23-P1P2
KRTAP10-7	P1P2	nonessential	KRTAP10-7_+_46020504.23-P1P2	GGCCATGCTGGGGATTGAAC	1	1	predicted	KRTAP10-7_+_46020501.23-P1P2	GATGCTGGGGATTGAACTGG	2	2	predicted	KRTAP10-7_+_46020504.23-P1P2|KRTAP10-7_+_46020501.23-P1P2
LCE3C	P1P2	nonessential	LCE3C_+_152572748.23-P1P2	GGGCCACTCACCAGATGCAG	1	1	predicted	LCE3C_+_152572741.23-P1P2	GCACCAGATGCAGAGGAGGT	2	2	predicted	LCE3C_+_152572748.23-P1P2|LCE3C_+_152572741.23-P1P2
TACR2	P2	nonessential	TACR2_+_71176645.23-P2	GGGCAGGGAAGCTGCAGCGA	1	1	predicted	TACR2_-_71176677.23-P2	GGCTTCCCTGCCGTTCTCTG	2	2	predicted	TACR2_+_71176645.23-P2|TACR2_-_71176677.23-P2
OR11L1	ENST00000355784.2	nonessential	OR11L1_+_248005043.23-ENST00000355784.2	GTCATCACCGTGGTGAGCCA	1	1	predicted	OR11L1_-_248004963.23-ENST00000355784.2	GGCAGGTTGGCTAGGAGAAG	2	2	predicted	OR11L1_+_248005043.23-ENST00000355784.2|OR11L1_-_248004963.23-ENST00000355784.2
SMS	P1P2	significant	SMS_+_21958834.23-P1P2	GGAGTGTGCTGCGCCCGGGG	1	3	empirical	SMS_+_21959263.23-P1P2	GGGACGGCCAGGGCCCGGAA	2	5	empirical	SMS_+_21958834.23-P1P2|SMS_+_21959263.23-P1P2
FAM214B	P1	nonessential	FAM214B_+_35115809.23-P1	GCCAAGTGCAACGGGACCCA	1	1	predicted	FAM214B_+_35115865.23-P1	GCAGGCGGAGGCTACAGCTA	2	2	predicted	FAM214B_+_35115809.23-P1|FAM214B_+_35115865.23-P1
PIP4K2C	P1P2	significant	PIP4K2C_-_57985075.23-P1P2	GTCGGTTGCGCGGGAGACTA	1	2	empirical	PIP4K2C_+_57985384.23-P1P2	GCCTGCTGGGGGAACACCTG	2	5	empirical	PIP4K2C_-_57985075.23-P1P2|PIP4K2C_+_57985384.23-P1P2
SEPHS2	P1P2	significant	SEPHS2_-_30457178.23-P1P2	GACTCAAGCCGTCAGACCCA	1	3	empirical	SEPHS2_+_30457164.23-P1P2	GGTGCATGCCGTGGGTCTGA	2	4	empirical	SEPHS2_-_30457178.23-P1P2|SEPHS2_+_30457164.23-P1P2
TYW5	P1P2	nonessential	TYW5_+_200820475.23-P1P2	GCTGCCGGTGCTGTATGGAA	1	1	predicted	TYW5_+_200820215.23-P1P2	GAGCCGAAGTTCCGAAGACC	2	2	predicted	TYW5_+_200820475.23-P1P2|TYW5_+_200820215.23-P1P2
SS18	P1P2	significant	SS18_-_23670593.23-P1P2	GCGGGTGAACGGCAAACTGG	1	3	empirical	SS18_+_23670540.23-P1P2	GGACTTGCCGATAGTGGTGA	2	1	empirical	SS18_-_23670593.23-P1P2|SS18_+_23670540.23-P1P2
HOXB4	P1P2	nonessential	HOXB4_+_46655726.23-P1P2	GAAACAGGAAAACGAGTCAG	1	1	predicted	HOXB4_-_46655578.23-P1P2	GGGCCGCCGGCGTAGTACCC	2	2	predicted	HOXB4_+_46655726.23-P1P2|HOXB4_-_46655578.23-P1P2
CAPS2	P1P2	nonessential	CAPS2_-_75784607.23-P1P2	GTACATTAGTTTAGTGAAAA	1	1	predicted	CAPS2_+_75784481.23-P1P2	GTTGCTGAGTAACAGGTCTG	2	2	predicted	CAPS2_-_75784607.23-P1P2|CAPS2_+_75784481.23-P1P2
ZNF90	P1P2	nonessential	ZNF90_+_20188835.23-P1P2	GAAGCAGCTAAGACCAGATT	1	1	predicted	ZNF90_-_20188801.23-P1P2	GAGAGGAAGGCTTTCGGGTT	2	2	predicted	ZNF90_+_20188835.23-P1P2|ZNF90_-_20188801.23-P1P2
TOMM22	P1P2	significant	TOMM22_+_39078005.23-P1P2	GGACTGGGGTTCCCCTGCAC	1	5	empirical	TOMM22_-_39078185.23-P1P2	GGTACGGGATCGGAGCGAAG	2	10	empirical	TOMM22_+_39078005.23-P1P2|TOMM22_-_39078185.23-P1P2
CD5L	P1P2	significant	CD5L_+_157811487.23-P1P2	GCCTTCACCTGCCTTGGTCA	1	3	empirical	CD5L_-_157811498.23-P1P2	GAATAGCAGAGCCATGACCA	1	1	predicted	CD5L_+_157811487.23-P1P2|CD5L_-_157811498.23-P1P2
OR2A14	ENST00000408899.2	nonessential	OR2A14_+_143826186.23-ENST00000408899.2	GCATGCTCTTGTGGACATCT	1	1	predicted	OR2A14_+_143826181.23-ENST00000408899.2	GTCTTGTGGACATCTAGGAC	2	2	predicted	OR2A14_+_143826186.23-ENST00000408899.2|OR2A14_+_143826181.23-ENST00000408899.2
ZNF274	P1P2	nonessential	ZNF274_+_58694488.23-P1P2	GACGAAGGCGACCACTCTTG	1	1	predicted	ZNF274_+_58694473.23-P1P2	GCTTGGGGCAGAGCAGAAGC	2	2	predicted	ZNF274_+_58694488.23-P1P2|ZNF274_+_58694473.23-P1P2
SIT1	P1P2	nonessential	SIT1_+_35650880.23-P1P2	GTACGGGCCTGAGGAGGGAT	1	1	predicted	SIT1_+_35650586.23-P1P2	GGGACTGTGGGTCCTCTTAG	2	2	predicted	SIT1_+_35650880.23-P1P2|SIT1_+_35650586.23-P1P2
B3GALT1	P1P2	nonessential	B3GALT1_+_168725401.23-P1P2	GGATTGTCCATGGGCCTCAG	1	1	predicted	B3GALT1_+_168725410.23-P1P2	GTGAGGTGGAGATTGTCCAT	2	2	predicted	B3GALT1_+_168725401.23-P1P2|B3GALT1_+_168725410.23-P1P2
MSRB1	P1P2	nonessential	MSRB1_+_1993161.23-P1P2	GAAGCGCGCTGCGGTTCCGG	1	1	predicted	MSRB1_+_1993208.23-P1P2	GGTACCGGCGGTCGTCGGGT	2	2	predicted	MSRB1_+_1993161.23-P1P2|MSRB1_+_1993208.23-P1P2
ZNF585B	P1P2	nonessential	ZNF585B_+_37701409.23-P1P2	GAAGTGGAAGTGGTCCCCGA	1	1	predicted	ZNF585B_-_37701366.23-P1P2	GAATCGTCACAGAGACCTCT	2	2	predicted	ZNF585B_+_37701409.23-P1P2|ZNF585B_-_37701366.23-P1P2
NDUFA12	P1P2	significant	NDUFA12_+_95397427.23-P1P2	GTAGTGCAGGTCCTGAAACG	1	3	empirical	NDUFA12_+_95397381.23-P1P2	GCGGTCTCCGAGGCTATCTA	2	6	empirical	NDUFA12_+_95397427.23-P1P2|NDUFA12_+_95397381.23-P1P2
NEDD4L	ENST00000357895.5	nonessential	NEDD4L_+_55816744.23-ENST00000357895.5	GTAGGAGAATACAATATTAA	1	1	predicted	NEDD4L_+_55816673.23-ENST00000357895.5	GGAAGAGTATGCGGAAGTCG	2	2	predicted	NEDD4L_+_55816744.23-ENST00000357895.5|NEDD4L_+_55816673.23-ENST00000357895.5
TBC1D10A	P1P2	nonessential	TBC1D10A_-_30722781.23-P1P2	GTCGTCGGTGGTTGCGGCGT	1	1	predicted	TBC1D10A_+_30722853.23-P1P2	GCTGGGATGGCGAAGAGCAA	2	2	predicted	TBC1D10A_-_30722781.23-P1P2|TBC1D10A_+_30722853.23-P1P2
SMIM18	P1P2	nonessential	SMIM18_-_30496160.23-P1P2	GATCCTCTCAGACAAGAGGT	1	1	predicted	SMIM18_-_30496089.23-P1P2	GTAGAAGCACAGCTCCATCT	2	2	predicted	SMIM18_-_30496160.23-P1P2|SMIM18_-_30496089.23-P1P2
OLFML2B	P1P2	nonessential	OLFML2B_-_161993616.23-P1P2	GACGCACGGGGACCGGACAC	1	1	predicted	OLFML2B_-_161993466.23-P1P2	GAGCCGGACGCAAGGAAGAG	2	2	predicted	OLFML2B_-_161993616.23-P1P2|OLFML2B_-_161993466.23-P1P2
BORA	P1P2	essential	BORA_+_73302094.23-P1P2	GCGACTCCAGGGAGCTCCGG	1	3	essential	BORA_-_73302125.23-P1P2	GTCCCTGGAGTCGGTACTGG	2	4	essential	BORA_+_73302094.23-P1P2|BORA_-_73302125.23-P1P2
ABI1	P1P2	nonessential	ABI1_-_27149837.23-P1P2	GTCTCGCGTTAAAGAGACAG	1	1	predicted	ABI1_-_27149855.23-P1P2	GGAGGCAGCAAGGTCCGCCG	2	2	predicted	ABI1_-_27149837.23-P1P2|ABI1_-_27149855.23-P1P2
DHFR	P1P2	nonessential	DHFR_+_79950771.23-P1P2	GCAGAACCTACTATGTGCGG	1	1	predicted	DHFR_-_79950787.23-P1P2	GAGCTGCCGCCGCACATAGT	2	2	predicted	DHFR_+_79950771.23-P1P2|DHFR_-_79950787.23-P1P2
AMER1	P1P2	nonessential	AMER1_+_63425562.23-P1P2	GCTGGAGGTGACTGGAGCCg	1	1	predicted	AMER1_+_63425598.23-P1P2	GGGGAGCTACCCAAAGCCTG	2	2	predicted	AMER1_+_63425562.23-P1P2|AMER1_+_63425598.23-P1P2
RGS9BP	P1P2	nonessential	RGS9BP_+_33166811.23-P1P2	GTCCGTGGGTGCCAACTCCG	1	1	predicted	RGS9BP_+_33166825.23-P1P2	GTGCGGTCCCCATCCTCCGT	2	2	predicted	RGS9BP_+_33166811.23-P1P2|RGS9BP_+_33166825.23-P1P2
TCF7	P1P2	nonessential	TCF7_-_133451208.23-P1P2	GAGGAGGCGGCAGAACCCAG	1	1	predicted	TCF7_-_133450415.23-P1P2	GGTTCCGACCCGCCAGCTCG	2	2	predicted	TCF7_-_133451208.23-P1P2|TCF7_-_133450415.23-P1P2
ANKRD13C	P1P2	nonessential	ANKRD13C_+_70820351.23-P1P2	GCGGTGTAAGGCAGCGACGG	1	1	predicted	ANKRD13C_-_70820382.23-P1P2	GTGCCTTACACCGAAAAACA	2	2	predicted	ANKRD13C_+_70820351.23-P1P2|ANKRD13C_-_70820382.23-P1P2
WDR83	P2	nonessential	WDR83_-_12777671.23-P2	GTAGCCCTGGGCAATCCCGG	1	1	predicted	WDR83_-_12777639.23-P2	GGCGCGGTCTGGAGGCTCAC	2	2	predicted	WDR83_-_12777671.23-P2|WDR83_-_12777639.23-P2
MYLK	ENST00000360304.3	nonessential	MYLK_-_123603205.23-ENST00000360304.3	GGCGCGTCcgggactgggca	1	1	predicted	MYLK_-_123603166.23-ENST00000360304.3	GCGCCCTGCTGCCGACCGGG	2	2	predicted	MYLK_-_123603205.23-ENST00000360304.3|MYLK_-_123603166.23-ENST00000360304.3
SLC26A11	P1P2	nonessential	SLC26A11_-_78194258.23-P1P2	GATTCCTGCGGACCCAGCTG	1	1	predicted	SLC26A11_-_78194246.23-P1P2	GCTGTCCCCGGCGATTCCTG	2	2	predicted	SLC26A11_-_78194258.23-P1P2|SLC26A11_-_78194246.23-P1P2
GCLM	P1P2	nonessential	GCLM_-_94374826.23-P1P2	GGGCCCGAGAGAGACCCGAG	1	1	predicted	GCLM_-_94374989.23-P1P2	GGAGAGCTGATTCCAAACTG	2	2	predicted	GCLM_-_94374826.23-P1P2|GCLM_-_94374989.23-P1P2
SIGLEC15	P2	nonessential	SIGLEC15_+_43409102.23-P2	GACAGGCTGACCCTGCTGTG	1	1	predicted	SIGLEC15_-_43409066.23-P2	GCAGCAGAGACAGGCTACAT	2	2	predicted	SIGLEC15_+_43409102.23-P2|SIGLEC15_-_43409066.23-P2
MAATS1	P1P2	significant	MAATS1_+_119421842.23-P1P2	GGCCGGCGCGCAGGGATAGg	1	2	empirical	MAATS1_+_119421961.23-P1P2	GTGGGCCTGGGGCTCCTCGA	2	3	empirical	MAATS1_+_119421842.23-P1P2|MAATS1_+_119421961.23-P1P2
KIAA1984	P1P2	nonessential	KIAA1984_+_139694810.23-P1P2	GGACCGAGGGCGCAGTGAGA	1	1	predicted	KIAA1984_+_139694834.23-P1P2	GCCAGCTGGCGGATGATCTG	2	2	predicted	KIAA1984_+_139694810.23-P1P2|KIAA1984_+_139694834.23-P1P2
IGFBP3	P1P2	nonessential	IGFBP3_-_45960825.23-P1P2	GGCGCGAAGCTGTGGAATCC	1	1	predicted	IGFBP3_-_45960804.23-P1P2	GGGGATGGGGCGACAGTACA	2	2	predicted	IGFBP3_-_45960825.23-P1P2|IGFBP3_-_45960804.23-P1P2
HJURP	P1P2	essential	HJURP_+_234763174.23-P1P2	GCGCGCGAGGCCCTGCAGTC	1	9	essential	HJURP_+_234762977.23-P1P2	GAGGCCTGCGTGTCGGAGTG	2	1	essential	HJURP_+_234763174.23-P1P2|HJURP_+_234762977.23-P1P2
ZNF232	P2	nonessential	ZNF232_-_5026364.23-P2	GGGACCTGGGCTGGATCCTT	1	1	predicted	ZNF232_+_5026346.23-P2	GGAGCCTAAGGATCCAGCCC	2	2	predicted	ZNF232_-_5026364.23-P2|ZNF232_+_5026346.23-P2
STK25	P1P2	nonessential	STK25_-_242447975.23-P1P2	GCCAGCCCGCGAAGCAACGG	1	1	predicted	STK25_-_242447978.23-P1P2	GGCCCGCGAAGCAACGGTGG	2	2	predicted	STK25_-_242447975.23-P1P2|STK25_-_242447978.23-P1P2
DEFB107B	ENST00000355602.2	nonessential	DEFB107B_+_7353449.23-ENST00000355602.2	GTCATGGCTCCAGGCATCAG	1	1	predicted	DEFB107B_+_7353435.23-ENST00000355602.2	GATCAGTGGAGAGCTGATGA	2	2	predicted	DEFB107B_+_7353449.23-ENST00000355602.2|DEFB107B_+_7353435.23-ENST00000355602.2
RADIL	P1P2	nonessential	RADIL_+_4923271.23-P1P2	GGCCGGCCCCAGCCAACGGC	1	1	predicted	RADIL_+_4923267.23-P1P2	GGCCCCAGCCAACGGCGGGT	2	2	predicted	RADIL_+_4923271.23-P1P2|RADIL_+_4923267.23-P1P2
GATA2	P2	significant	GATA2_-_128206683.23-P2	GCTTACAGGGTAGGAGCTGG	1	1	empirical	GATA2_-_128206670.23-P2	GGAGGCTGGCGGGGCTTACA	2	3	empirical	GATA2_-_128206683.23-P2|GATA2_-_128206670.23-P2
CYP26B1	P1	nonessential	CYP26B1_+_72371223.23-P1	GACGTGCGCAAGATCCTCAT	1	1	predicted	CYP26B1_+_72371195.23-P1	GCCACCTCGTGAGCACCGAG	2	2	predicted	CYP26B1_+_72371223.23-P1|CYP26B1_+_72371195.23-P1
ADRB3	P1P2	nonessential	ADRB3_+_37824097.23-P1P2	GCTGGGACAGCTAGAGAAGA	1	1	predicted	ADRB3_-_37823993.23-P1P2	GAGGCCACGGAGCCATCCCC	2	2	predicted	ADRB3_+_37824097.23-P1P2|ADRB3_-_37823993.23-P1P2
OR51I1	ENST00000380211.1	nonessential	OR51I1_+_5462691.23-ENST00000380211.1	GCAGCAACACTCCAGCTGAC	1	1	predicted	OR51I1_+_5462682.23-ENST00000380211.1	GTCCAGCTGACAGGCATTCC	2	2	predicted	OR51I1_+_5462691.23-ENST00000380211.1|OR51I1_+_5462682.23-ENST00000380211.1
RFPL4B	P1P2	nonessential	RFPL4B_-_112668544.23-P1P2	GGAAACTCCGAGAGGAGCAG	2	2	predicted	RFPL4B_-_112668536.23-P1P2	GTCTCCGCGGAAACTCCGAG	3	3	predicted	RFPL4B_-_112668544.23-P1P2|RFPL4B_-_112668536.23-P1P2
URGCP	P1	nonessential	URGCP_-_43946163.23-P1	GCTGCGAGGCGGCACTCACC	1	1	predicted	URGCP_+_43946170.23-P1	GGGAGACCTCGCTGCGCTCA	2	2	predicted	URGCP_-_43946163.23-P1|URGCP_+_43946170.23-P1
TAAR5	ENST00000258034.2	nonessential	TAAR5_+_132910842.23-ENST00000258034.2	GGTGGCCAGTTCTCAGACAG	1	1	predicted	TAAR5_-_132910875.23-ENST00000258034.2	GAACTGGCCACCTTCTCCAC	2	2	predicted	TAAR5_+_132910842.23-ENST00000258034.2|TAAR5_-_132910875.23-ENST00000258034.2
ZNF605	P1P2	nonessential	ZNF605_-_133532717.23-P1P2	GCAGCCAGCTCGTTCGCGCT	1	1	predicted	ZNF605_-_133532936.23-P1P2	GTGGAACTACACTTCCCGGG	2	2	predicted	ZNF605_-_133532717.23-P1P2|ZNF605_-_133532936.23-P1P2
SENP3	P1P2	nonessential	SENP3_-_7465277.23-P1P2	GACCGCTGCCGGTGGGCCCG	1	1	predicted	SENP3_-_7465270.23-P1P2	GGTGCGCCACCGCTGCCGGT	2	2	predicted	SENP3_-_7465277.23-P1P2|SENP3_-_7465270.23-P1P2
MED29	P1P2	significant	MED29_-_39882017.23-P1P2	GGGGATGCTGAAAAGCAACG	1	7	empirical	MED29_-_39882278.23-P1P2	GCAGCTGAAGGAGAGTCTAC	2	4	empirical	MED29_-_39882017.23-P1P2|MED29_-_39882278.23-P1P2
SNTG2	P1P2	nonessential	SNTG2_-_946604.23-P1P2	Ggcgcggacgcggcgcctgg	1	1	predicted	SNTG2_-_946583.23-P1P2	GGGAGCCGGCAGAggggcgc	2	2	predicted	SNTG2_-_946604.23-P1P2|SNTG2_-_946583.23-P1P2
XPNPEP3	P1P2	nonessential	XPNPEP3_+_41253139.23-P1P2	GAGAGAAAGAGGGTAACGAC	1	1	predicted	XPNPEP3_+_41253206.23-P1P2	GCTACAGCGGGAACCAGCTT	2	2	predicted	XPNPEP3_+_41253139.23-P1P2|XPNPEP3_+_41253206.23-P1P2
ACYP2	P1P2	nonessential	ACYP2_-_54342821.23-P1P2	GCTCTCCGGCTCCTCAACAG	1	1	predicted	ACYP2_+_54342748.23-P1P2	GCGAGAGGGAGGGGACACAT	2	2	predicted	ACYP2_-_54342821.23-P1P2|ACYP2_+_54342748.23-P1P2
MCL1	P1P2	significant	MCL1_-_150552064.23-P1P2	GGAAGACCCCGACTCCTTAC	1	1	empirical	MCL1_+_150552050.23-P1P2	GCTTCCTTCCAGTAAGGAGT	2	2	empirical	MCL1_-_150552064.23-P1P2|MCL1_+_150552050.23-P1P2
CCDC69	P1P2	nonessential	CCDC69_-_150603582.23-P1P2	GCCAACTCCGGGGCCCCCAG	1	1	predicted	CCDC69_-_150603596.23-P1P2	GCCCAGAGGAGCCTGCGATC	2	2	predicted	CCDC69_-_150603582.23-P1P2|CCDC69_-_150603596.23-P1P2
NCALD	ENST00000311028.3,ENST00000521599.1	nonessential	NCALD_+_103136303.23-ENST00000311028.3,ENST00000521599.1	GGCGCGCGGTTCTGGGAACC	1	1	predicted	NCALD_+_103136668.23-ENST00000311028.3,ENST00000521599.1	GTGGCCCCCCTGCAACCCCG	2	2	predicted	NCALD_+_103136303.23-ENST00000311028.3,ENST00000521599.1|NCALD_+_103136668.23-ENST00000311028.3,ENST00000521599.1
RIMBP3B	ENST00000434111.1	nonessential	RIMBP3B_-_21737871.23-ENST00000434111.1	GGGGACTTGGTGCTAGTAGC	1	1	predicted	RIMBP3B_-_21737723.23-ENST00000434111.1	GAGGTATGCCCACACCCCAT	2	2	predicted	RIMBP3B_-_21737871.23-ENST00000434111.1|RIMBP3B_-_21737723.23-ENST00000434111.1
SYTL1	P2	nonessential	SYTL1_-_27669777.23-P2	GCACTGTGGTACCTGAGCAT	1	1	predicted	SYTL1_-_27669828.23-P2	GGGGACCCCAGCCTGGTCTG	2	2	predicted	SYTL1_-_27669777.23-P2|SYTL1_-_27669828.23-P2
TMEM160	P1P2	nonessential	TMEM160_-_47551831.23-P1P2	GGACCTCCGGAAGCGAAGAC	1	1	predicted	TMEM160_+_47551864.23-P1P2	GCCGTAGTGCGAATCATGGG	2	2	predicted	TMEM160_-_47551831.23-P1P2|TMEM160_+_47551864.23-P1P2
ZDHHC5	P1P2	nonessential	ZDHHC5_-_57435631.23-P1P2	GGAGGCGGCGGTGACAACGA	2	2	predicted	ZDHHC5_-_57435496.23-P1P2	GGACCCGGCACTGAGGGCAA	3	3	predicted	ZDHHC5_-_57435631.23-P1P2|ZDHHC5_-_57435496.23-P1P2
RTN4R	P1P2	nonessential	RTN4R_-_20255777.23-P1P2	Ggctccgcccggctctggct	1	1	predicted	RTN4R_-_20255747.23-P1P2	Gccggccgcgggacgaggct	2	2	predicted	RTN4R_-_20255777.23-P1P2|RTN4R_-_20255747.23-P1P2
LEPR	P1P2	nonessential	LEPR_-_65886413.23-P1P2	GCCCAGTTCGGGAGACATGG	1	1	predicted	LEPR_-_65886410.23-P1P2	GGGCCCCAGTTCGGGAGACA	2	2	predicted	LEPR_-_65886413.23-P1P2|LEPR_-_65886410.23-P1P2
DMRT1	P1P2	nonessential	DMRT1_+_841762.23-P1P2	GCTGCGAGGGATGAACCCGA	1	1	predicted	DMRT1_+_841744.23-P1P2	GACGGACAGCGACGCTCCGG	2	2	predicted	DMRT1_+_841762.23-P1P2|DMRT1_+_841744.23-P1P2
SPRY1	P1P2	nonessential	SPRY1_+_124318013.23-P1P2	GCTGTTCCTTATCCAGGGCA	1	1	predicted	SPRY1_+_124317976.23-P1P2	GCACTCTGCAAAGCACGCAG	2	2	predicted	SPRY1_+_124318013.23-P1P2|SPRY1_+_124317976.23-P1P2
TYRO3	P1P2	nonessential	TYRO3_+_41851449.23-P1P2	GTCCGCCTCAGCGCCATCGG	1	1	predicted	TYRO3_-_41851466.23-P1P2	GGTCGCCGCCGATGGCGCTG	2	2	predicted	TYRO3_+_41851449.23-P1P2|TYRO3_-_41851466.23-P1P2
NRBF2	P1P2	significant	NRBF2_-_64893423.23-P1P2	GGCAGGCCCTGGCCCAACTG	1	8	empirical	NRBF2_+_64893099.23-P1P2	GCGCCCCAAGAGCCAGCGAT	2	3	empirical	NRBF2_-_64893423.23-P1P2|NRBF2_+_64893099.23-P1P2
CDO1	P1P2	nonessential	CDO1_-_115152304.23-P1P2	GCAGGCCCCTGGCAGCGCAG	1	1	predicted	CDO1_-_115152311.23-P1P2	GCTGGCAGCGCAGTGGATCC	2	2	predicted	CDO1_-_115152304.23-P1P2|CDO1_-_115152311.23-P1P2
MAGED2	P2	nonessential	MAGED2_-_54835553.23-P2	GATCTTCCTGGAGAAGGGGA	1	1	predicted	MAGED2_+_54835592.23-P2	GCGACTCCGTTCTCAGATAC	2	2	predicted	MAGED2_-_54835553.23-P2|MAGED2_+_54835592.23-P2
C9orf37	P1P2	nonessential	C9orf37_+_140513241.23-P1P2	GGCCCGCGGGGTAGGAGACC	1	1	predicted	C9orf37_-_140513022.23-P1P2	GCGCGCCGGGGACACCCCAC	2	2	predicted	C9orf37_+_140513241.23-P1P2|C9orf37_-_140513022.23-P1P2
AMPD3	P1P2	nonessential	AMPD3_-_10476823.23-P1P2	GGCCTTCCCACTCTCCTAAA	1	1	predicted	AMPD3_-_10476980.23-P1P2	GCGGAGCTGGAGGCCCACGT	2	2	predicted	AMPD3_-_10476823.23-P1P2|AMPD3_-_10476980.23-P1P2
KCNK3	P1P2	nonessential	KCNK3_-_26915669.23-P1P2	GATGCCCCAGGCCGCCTCCG	1	1	predicted	KCNK3_-_26915856.23-P1P2	GGGAGCCCGAGCTGATCGAG	2	2	predicted	KCNK3_-_26915669.23-P1P2|KCNK3_-_26915856.23-P1P2
POTEC	P1P2	nonessential	POTEC_+_14543132.23-P1P2	GTAAAAGCAGATGGTGACTG	1	1	predicted	POTEC_-_14543167.23-P1P2	GTGCTTTTAACAGCCCGGGG	2	2	predicted	POTEC_+_14543132.23-P1P2|POTEC_-_14543167.23-P1P2
CDH23	P1P2	nonessential	CDH23_-_73156723.23-P1P2	GGCTCGGGAGAGAGGGACGC	1	1	predicted	CDH23_-_73156765.23-P1P2	GTAGAGGACGCGTCCGACGG	2	2	predicted	CDH23_-_73156723.23-P1P2|CDH23_-_73156765.23-P1P2
SLC36A3	P1P2	nonessential	SLC36A3_+_150683306.23-P1P2	GTGAGCCTGGCCCCACGTCC	1	1	predicted	SLC36A3_+_150683283.23-P1P2	GACCAGGACCTCCAATCCAA	2	2	predicted	SLC36A3_+_150683306.23-P1P2|SLC36A3_+_150683283.23-P1P2
SMCP	P1P2	nonessential	SMCP_+_152850857.23-P1P2	GTCTCATGACTGATTCCAGT	1	1	predicted	SMCP_-_152850808.23-P1P2	GCATCTGGTTCAGAAGGCTT	2	2	predicted	SMCP_+_152850857.23-P1P2|SMCP_-_152850808.23-P1P2
UBE2W	P1P2	nonessential	UBE2W_+_74790945.23-P1P2	GCCGCGATTCGGGGACACCC	1	1	predicted	UBE2W_+_74791034.23-P1P2	GTGGCGTCAATGCAGGTGAG	3	3	predicted	UBE2W_+_74790945.23-P1P2|UBE2W_+_74791034.23-P1P2
TMEM212	P1P2	nonessential	TMEM212_-_171561191.23-P1P2	GAAAATGAAGGGCCTCTACC	1	1	predicted	TMEM212_+_171561199.23-P1P2	GCCCCAGAGTAACAAGAATC	2	2	predicted	TMEM212_-_171561191.23-P1P2|TMEM212_+_171561199.23-P1P2
MMEL1	ENST00000378412.3	nonessential	MMEL1_-_2564540.23-ENST00000378412.3	GCAGTCAGGAGGTTCCACTG	1	1	predicted	MMEL1_+_2564330.23-ENST00000378412.3	GTCTCCAGGGGCCTGACTGT	2	2	predicted	MMEL1_-_2564540.23-ENST00000378412.3|MMEL1_+_2564330.23-ENST00000378412.3
APOBEC2	P1P2	significant	APOBEC2_-_41021362.23-P1P2	GGCACCAGTGGGCCCGGCAG	1	9	empirical	APOBEC2_+_41021194.23-P1P2	GCTGTGACAATCTCAAAGGG	2	2	empirical	APOBEC2_-_41021362.23-P1P2|APOBEC2_+_41021194.23-P1P2
CSGALNACT1	P2	nonessential	CSGALNACT1_+_19459704.23-P2	GAGAGCTGCGAGTTAGGAAG	1	1	predicted	CSGALNACT1_+_19459696.23-P2	GGAGTTAGGAAGCGGCTCGC	2	2	predicted	CSGALNACT1_+_19459704.23-P2|CSGALNACT1_+_19459696.23-P2
ZNF790	P1	nonessential	ZNF790_-_37329260.23-P1	GCGGCCCTGCGGTCCCTTGA	1	1	predicted	ZNF790_+_37329251.23-P1	GCGGAACCTTCCACCATCAA	2	2	predicted	ZNF790_-_37329260.23-P1|ZNF790_+_37329251.23-P1
LIPH	P1P2	nonessential	LIPH_-_185270369.23-P1P2	GGTGAGCTCAGACGACTCAG	1	1	predicted	LIPH_-_185270374.23-P1P2	GCTCAGACGACTCAGAGGTG	2	2	predicted	LIPH_-_185270369.23-P1P2|LIPH_-_185270374.23-P1P2
MTUS2	P1P2	nonessential	MTUS2_+_30002974.23-P1P2	GCAGCAGCAATGGCCCATCC	1	1	predicted	MTUS2_+_30002723.23-P1P2	Gggcgggcgggagccaggaa	2	2	predicted	MTUS2_+_30002974.23-P1P2|MTUS2_+_30002723.23-P1P2
C11orf52	P1	significant	C11orf52_+_111783520.23-P1	GCAGCAGAAGCCCTGGTCCG	1	5	empirical	C11orf52_+_111783468.23-P1	GCCAGCTGCCCGGAGAGCCA	2	2	empirical	C11orf52_+_111783520.23-P1|C11orf52_+_111783468.23-P1
GLI2	ENST00000361492.4	nonessential	GLI2_-_121554890.23-ENST00000361492.4	GTGCCACCCAGGACGATGAG	1	1	predicted	GLI2_+_121554921.23-ENST00000361492.4	GTTGGCTTCTTGCTTCTCGG	2	2	predicted	GLI2_-_121554890.23-ENST00000361492.4|GLI2_+_121554921.23-ENST00000361492.4
LY6G6C	P1P2	nonessential	LY6G6C_-_31689478.23-P1P2	GGCGAGGGTCCTGAGAATGG	1	1	predicted	LY6G6C_-_31689448.23-P1P2	GGACAGGGTGAGCAGCATAA	2	2	predicted	LY6G6C_-_31689478.23-P1P2|LY6G6C_-_31689448.23-P1P2
RASSF7	P1P2	significant	RASSF7_+_560386.23-P1P2	GCGGGAGGTGCCCGCTCAGA	1	1	empirical	RASSF7_-_561273.23-P1P2	GGGCGAGCGCAGCGATTAGG	2	2	empirical	RASSF7_+_560386.23-P1P2|RASSF7_-_561273.23-P1P2
MRC1	ENST00000239761.3	nonessential	MRC1_+_18098412.23-ENST00000239761.3	GCTTCTCCTGATGGACAGGA	1	1	predicted	MRC1_-_18098384.23-ENST00000239761.3	GTAGGTGGAGAGGCAGTTGG	2	2	predicted	MRC1_+_18098412.23-ENST00000239761.3|MRC1_-_18098384.23-ENST00000239761.3
ABCA8	P1P2	nonessential	ABCA8_+_66951401.23-P1P2	GTTCTAAACAAGGAGCTCAG	1	1	predicted	ABCA8_-_66951525.23-P1P2	GGTGAAGACTGCTTTCAGAG	2	2	predicted	ABCA8_+_66951401.23-P1P2|ABCA8_-_66951525.23-P1P2
MRGPRX1	P1P2	nonessential	MRGPRX1_+_18960840.23-P1P2	GCGTCTTCACCACTGGACAA	1	1	predicted	MRGPRX1_-_18960668.23-P1P2	GGTTGAAACTCACACAGTCT	2	2	predicted	MRGPRX1_+_18960840.23-P1P2|MRGPRX1_-_18960668.23-P1P2
VWA3A	P1P2	nonessential	VWA3A_+_22103915.23-P1P2	GAAGGGCTCCTGGCACTCCA	1	1	predicted	VWA3A_-_22103914.23-P1P2	GGTGAGATCCAGGAGAAGTA	2	2	predicted	VWA3A_+_22103915.23-P1P2|VWA3A_-_22103914.23-P1P2
TNFSF14	P1P2	nonessential	TNFSF14_-_6670115.23-P1P2	GGAGCAGGGCTGACACGCCT	1	1	predicted	TNFSF14_+_6670081.23-P1P2	GGCCCTGCTCCAGACACCTT	2	2	predicted	TNFSF14_-_6670115.23-P1P2|TNFSF14_+_6670081.23-P1P2
WBSCR22	P1P2	significant	WBSCR22_-_73097989.23-P1P2	GGCCGGCGTCCGGAGCATGG	1	3	empirical	WBSCR22_-_73097911.23-P1P2	GGGCTGATGACATAAAAACC	2	7	empirical	WBSCR22_-_73097989.23-P1P2|WBSCR22_-_73097911.23-P1P2
HABP4	P1P2	significant	HABP4_+_99212531.23-P1P2	GGACCACTGCGGGCCCGGGA	1	3	empirical	HABP4_-_99213009.23-P1P2	GGAGGGGCCCGGGAACAGTA	2	6	empirical	HABP4_+_99212531.23-P1P2|HABP4_-_99213009.23-P1P2
CCDC37	P1P2	nonessential	CCDC37_-_126113817.23-P1P2	GGAGCGAGCCGGGGCAGTCG	1	1	predicted	CCDC37_-_126113808.23-P1P2	GGAGGCTTCGGAGCGAGCCG	2	2	predicted	CCDC37_-_126113817.23-P1P2|CCDC37_-_126113808.23-P1P2
ANHX	P1P2	nonessential	ANHX_+_133812391.23-P1P2	GCGCTGAAGCGGGTCCCgga	1	1	predicted	ANHX_+_133812402.23-P1P2	GACGTGCGCCGGCGCTGAAG	2	2	predicted	ANHX_+_133812391.23-P1P2|ANHX_+_133812402.23-P1P2
FGFR3	P1P2	nonessential	FGFR3_-_1795030.23-P1P2	GGCCCAGGCTCAGTGCGCGG	1	1	predicted	FGFR3_+_1795055.23-P1P2	GCCGGCAGAGCAGGACCGCG	2	2	predicted	FGFR3_-_1795030.23-P1P2|FGFR3_+_1795055.23-P1P2
UHRF1	P1P2	significant	UHRF1_+_4910126.23-P1P2	GCCCGCCGCCGGGACTACAG	1	3	empirical	UHRF1_+_4909924.23-P1P2	GCGGAGCCTGACATCCTCCC	2	8	empirical	UHRF1_+_4910126.23-P1P2|UHRF1_+_4909924.23-P1P2
PAMR1	P1P2	nonessential	PAMR1_+_35547150.23-P1P2	GCCCTCCCCAGTAGACGCTC	1	1	predicted	PAMR1_+_35547129.23-P1P2	GGCACCAGCCGCGGCAAGGA	2	2	predicted	PAMR1_+_35547150.23-P1P2|PAMR1_+_35547129.23-P1P2
TTC22	P1P2	nonessential	TTC22_+_55266966.23-P1P2	GGAGGCGCCCTGAGACCGAG	1	1	predicted	TTC22_-_55266930.23-P1P2	GCGAGCGAGCTCCGTGCGGG	2	2	predicted	TTC22_+_55266966.23-P1P2|TTC22_-_55266930.23-P1P2
PPFIA3	P2	nonessential	PPFIA3_-_49622853.23-P2	GCGCGCGAGCGTCGGAGACA	1	1	predicted	PPFIA3_+_49623064.23-P2	GGGTCCCCTGGGATGAGGAA	3	3	predicted	PPFIA3_-_49622853.23-P2|PPFIA3_+_49623064.23-P2
EFCAB11	P1P2	nonessential	EFCAB11_+_90421044.23-P1P2	GAGCCAGGCTGGGAAAGCGG	1	1	predicted	EFCAB11_-_90420865.23-P1P2	GCAGAGTGAGACCCAGACAC	2	2	predicted	EFCAB11_+_90421044.23-P1P2|EFCAB11_-_90420865.23-P1P2
EMD	P1P2	nonessential	EMD_+_153607778.23-P1P2	GACCAAAACCGGCCGAGCAA	1	1	predicted	EMD_+_153607759.23-P1P2	GCGGCTGCCGAGGAGCACGG	2	2	predicted	EMD_+_153607778.23-P1P2|EMD_+_153607759.23-P1P2
RBMX	P1P2	essential	RBMX_-_135962895.23-P1P2	GGCGCAACGAGGGCGAACAA	1	1	essential	RBMX_-_135962885.23-P1P2	GTAGCACTACTGCGCAACGA	2	2	essential	RBMX_-_135962895.23-P1P2|RBMX_-_135962885.23-P1P2
FGD4	P1P2	nonessential	FGD4_+_32639394.23-P1P2	GAGATGACAAGGGTCAACAG	1	1	predicted	FGD4_+_32638980.23-P1P2	GATTTGGATCCATAATTTGT	2	2	predicted	FGD4_+_32639394.23-P1P2|FGD4_+_32638980.23-P1P2
SLC38A10	P1P2	significant	SLC38A10_-_79268826.23-P1P2	GGTCACAGGTCCCAACGTCC	1	1	predicted	SLC38A10_+_79269001.23-P1P2	GGATTCACAGGCGGCCCGCG	2	2	predicted	SLC38A10_-_79268826.23-P1P2|SLC38A10_+_79269001.23-P1P2
H3F3B	P1P2	nonessential	H3F3B_+_73775842.23-P1P2	GCTTGGAGCGCAGAGCGGTT	1	1	predicted	H3F3B_+_73775827.23-P1P2	GGGTTTGGTCGTTCGTTGGG	2	2	predicted	H3F3B_+_73775842.23-P1P2|H3F3B_+_73775827.23-P1P2
FAM103A1	P1P2	significant	FAM103A1_-_83654987.23-P1P2	GGTTGTCGGATTTTAGAGGA	1	10	empirical	FAM103A1_+_83655189.23-P1P2	GGTACAGATCACCGCACAGG	2	1	empirical	FAM103A1_-_83654987.23-P1P2|FAM103A1_+_83655189.23-P1P2
OCIAD1	P1P2	significant	OCIAD1_+_48833107.23-P1P2	GCAAGAAGTCATCCAGACAG	1	3	empirical	OCIAD1_-_48833090.23-P1P2	GGTAAGTATACAGTGCCTCC	2	1	empirical	OCIAD1_+_48833107.23-P1P2|OCIAD1_-_48833090.23-P1P2
ATAD3A	P1P2	significant	ATAD3A_-_1448112.23-P1P2	GTGGCGCTCATAGGTTACAG	1	9	empirical	ATAD3A_+_1448130.23-P1P2	GCGGCGGTAACTGAAGACCA	2	6	empirical	ATAD3A_-_1448112.23-P1P2|ATAD3A_+_1448130.23-P1P2
EEF1B2	P1P2	nonessential	EEF1B2_+_207024362.23-P1P2	GGAACCAGCCCTAGAAGCGC	1	1	predicted	EEF1B2_+_207024400.23-P1P2	GTCTTAAGTTCGTACCTCCA	2	2	predicted	EEF1B2_+_207024362.23-P1P2|EEF1B2_+_207024400.23-P1P2
EPCAM	P1P2	nonessential	EPCAM_+_47596500.23-P1P2	Gtcgggaggacagcgacgag	1	1	predicted	EPCAM_+_47596336.23-P1P2	GTCGTTGATGAGTCACCGCC	2	2	predicted	EPCAM_+_47596500.23-P1P2|EPCAM_+_47596336.23-P1P2
OR1S1	ENST00000309433.6	nonessential	OR1S1_-_57982265.23-ENST00000309433.6	GTCGGCAGAAATATGCATCA	1	1	predicted	OR1S1_+_57982296.23-ENST00000309433.6	GATCCTGCTTGAAAAATCCC	2	2	predicted	OR1S1_-_57982265.23-ENST00000309433.6|OR1S1_+_57982296.23-ENST00000309433.6
PPM1F	P1P2	nonessential	PPM1F_+_22307083.23-P1P2	GCGAGCGCCCAAGGCGCACA	1	1	predicted	PPM1F_+_22307162.23-P1P2	GTGAGGCCCGCGGAGACCAG	2	2	predicted	PPM1F_+_22307083.23-P1P2|PPM1F_+_22307162.23-P1P2
SPINK4	P1P2	nonessential	SPINK4_+_33240217.23-P1P2	GGGCCAGGGCGATTACCCAC	1	1	predicted	SPINK4_+_33240214.23-P1P2	GCAGGGCGATTACCCACTGG	2	2	predicted	SPINK4_+_33240217.23-P1P2|SPINK4_+_33240214.23-P1P2
ADRBK2	P1P2	nonessential	ADRBK2_+_25960616.23-P1P2	GTACGGTCGCCCTCCCCTCG	1	1	predicted	ADRBK2_-_25960625.23-P1P2	GCCCTCGTGGCCACCCCGAG	2	2	predicted	ADRBK2_+_25960616.23-P1P2|ADRBK2_-_25960625.23-P1P2
CPNE7	P1P2	nonessential	CPNE7_+_89642219.23-P1P2	GcgcggcgcccgggAAATGG	1	1	predicted	CPNE7_+_89642204.23-P1P2	GATGGTGGCCGGCCCAGGCG	2	2	predicted	CPNE7_+_89642219.23-P1P2|CPNE7_+_89642204.23-P1P2
PARK7	P1P2	nonessential	PARK7_+_8021784.23-P1P2	GGTACCACTCACCCCACACC	1	1	predicted	PARK7_-_8021812.23-P1P2	GTGGGGTGAGTGGTACCCAA	2	2	predicted	PARK7_+_8021784.23-P1P2|PARK7_-_8021812.23-P1P2
AKAP12	P2	significant	AKAP12_+_151646850.23-P2	GCAGACACTCCCGGAGGATG	1	1	predicted	AKAP12_-_151646835.23-P2	GTTCGCTGCGGCAGCTCCGA	2	2	predicted	AKAP12_+_151646850.23-P2|AKAP12_-_151646835.23-P2
RMDN3	P1P2	significant	RMDN3_+_41047389.23-P1P2	GGTGGCTGGCGGCCGGGTAA	1	4	empirical	RMDN3_+_41047422.23-P1P2	GTGACAGCGTGAGCCCGCGG	2	2	empirical	RMDN3_+_41047389.23-P1P2|RMDN3_+_41047422.23-P1P2
MYH3	P2	nonessential	MYH3_+_10542691.23-P2	GGAGGCGCACCAGCAGGCCT	1	1	predicted	MYH3_-_10542696.23-P2	GTCAGCTTGGAGGTCATCCA	2	2	predicted	MYH3_+_10542691.23-P2|MYH3_-_10542696.23-P2
ODF4	P1P2	nonessential	ODF4_-_8243193.23-P1P2	GCCTGGCCTGCTGAATGGGT	1	1	predicted	ODF4_+_8243596.23-P1P2	GCAACACCTGGGCCATCCAG	2	2	predicted	ODF4_-_8243193.23-P1P2|ODF4_+_8243596.23-P1P2
CUTC	P1P2	significant	CUTC_-_101492344.23-P1P2	GAAACGGAGGGCGTGACgag	1	9	empirical	CUTC_-_101492241.23-P1P2	GCGGCGGGAGTCGTAGTCAG	2	2	empirical	CUTC_-_101492344.23-P1P2|CUTC_-_101492241.23-P1P2
BRSK1	P1P2	significant	BRSK1_-_55795401.23-P1P2	GGTGCCggagagaaaggacg	1	2	empirical	BRSK1_-_55795805.23-P1P2	GCCGGTCGGGCCGGGACCAA	2	7	empirical	BRSK1_-_55795401.23-P1P2|BRSK1_-_55795805.23-P1P2
POLR2D	P2	essential	POLR2D_+_128605175.23-P2	Gagggtcttaactcttgtcc	1	1	predicted	POLR2D_+_128604811.23-P2	GGGACAAGTGCTAAGTATTG	3	3	predicted	POLR2D_+_128605175.23-P2|POLR2D_+_128604811.23-P2
RBAK-RBAKDN	ENST00000407184.1	nonessential	RBAK-RBAKDN_-_5023809.23-ENST00000407184.1	Gtcacctgtatacctaccac	1	1	predicted	RBAK-RBAKDN_+_5023667.23-ENST00000407184.1	GTGTAGGATTACAGATATGG	2	2	predicted	RBAK-RBAKDN_-_5023809.23-ENST00000407184.1|RBAK-RBAKDN_+_5023667.23-ENST00000407184.1
CFL2	P1P2	nonessential	CFL2_+_35183742.23-P1P2	GGCCACAGCCGAGGGCACTA	1	1	predicted	CFL2_+_35183750.23-P1P2	GCCGCCGCAGCCACAGCCGA	2	2	predicted	CFL2_+_35183742.23-P1P2|CFL2_+_35183750.23-P1P2
ALDH8A1	P1P2	nonessential	ALDH8A1_+_135271208.23-P1P2	GGCTCAGTCGTAAAGAGGAA	1	1	predicted	ALDH8A1_-_135271197.23-P1P2	GGTTTGTTCCAGCCATAGCA	2	2	predicted	ALDH8A1_+_135271208.23-P1P2|ALDH8A1_-_135271197.23-P1P2
EIF4G1	P1P2	essential	EIF4G1_-_184032400.23-P1P2	GCTGTGCGGGGAGCCGGAAA	1	2	essential	EIF4G1_-_184032787.23-P1P2	GCCCACGGGCGCAGGCACCA	2	5	essential	EIF4G1_-_184032400.23-P1P2|EIF4G1_-_184032787.23-P1P2
ATP4A	P2	nonessential	ATP4A_-_36048687.23-P2	GCGCTCCAGCACGCGCTCGG	1	1	predicted	ATP4A_+_36048719.23-P2	GCCATACGCTGGAGGACCCG	2	2	predicted	ATP4A_-_36048687.23-P2|ATP4A_+_36048719.23-P2
KCNIP3	ENST00000468529.1	nonessential	KCNIP3_-_96012316.23-ENST00000468529.1	GGGAGCGGCGATGGAGGCTG	1	1	predicted	KCNIP3_+_96012664.23-ENST00000468529.1	GAGCCCGCACGGCCTCTCGG	2	2	predicted	KCNIP3_-_96012316.23-ENST00000468529.1|KCNIP3_+_96012664.23-ENST00000468529.1
HMX3	P1P2	significant	HMX3_+_124895494.23-P1P2	GGGCGGGGCGAGCAGGCGAG	1	5	empirical	HMX3_-_124895562.23-P1P2	GCCGGGGACCCGGAGGAGAG	2	1	empirical	HMX3_+_124895494.23-P1P2|HMX3_-_124895562.23-P1P2
AMTN	P1P2	nonessential	AMTN_+_71384334.23-P1P2	GGCAAAATGTACAATACTCA	1	1	predicted	AMTN_+_71384355.23-P1P2	GTGTTACCTTTGGGTCCACG	2	2	predicted	AMTN_+_71384334.23-P1P2|AMTN_+_71384355.23-P1P2
PPM1D	P1P2	significant	PPM1D_+_58677656.23-P1P2	GGACGACGCCGAGAAGGGGG	1	3	empirical	PPM1D_-_58677985.23-P1P2	GTCGGGGAAAGGCCCAGCGG	2	8	empirical	PPM1D_+_58677656.23-P1P2|PPM1D_-_58677985.23-P1P2
CAPN11	P1	nonessential	CAPN11_-_44126615.23-P1	GTCCCCAGGTAGGCACTCAT	1	1	predicted	CAPN11_+_44126596.23-P1	GGCCCCATGAGTGCCTACCT	2	2	predicted	CAPN11_-_44126615.23-P1|CAPN11_+_44126596.23-P1
TEX36	P1P2	nonessential	TEX36_+_127371686.23-P1P2	GAGGCTGAGAAGTAAAGATC	1	1	predicted	TEX36_-_127371664.23-P1P2	GTCATAAGCTCTACACGTCT	2	2	predicted	TEX36_+_127371686.23-P1P2|TEX36_-_127371664.23-P1P2
ACOT11	P2	significant	ACOT11_+_55007963.23-P2	GAGCCAGAGGCGGGAAGCTG	1	2	empirical	ACOT11_-_55008004.23-P2	GCTGGGCTCGGGGACCTCGG	1	1	predicted	ACOT11_+_55007963.23-P2|ACOT11_-_55008004.23-P2
ZNF514	P2	nonessential	ZNF514_-_95825235.23-P2	GCTGCACAGTCCCTAGCGGG	1	1	predicted	ZNF514_+_95825281.23-P2	GGGGCGCGCAGACCTGTACT	2	2	predicted	ZNF514_-_95825235.23-P2|ZNF514_+_95825281.23-P2
LTB4R	P1P2	nonessential	LTB4R_+_24780741.23-P1P2	GCGGGGCAGCAGATCTCCAG	1	1	predicted	LTB4R_+_24780758.23-P1P2	GGGAAACGGGGACCTGCCCG	2	2	predicted	LTB4R_+_24780741.23-P1P2|LTB4R_+_24780758.23-P1P2
DNAJA3	P1P2	essential	DNAJA3_+_4475898.23-P1P2	GACCACCAGCAACCAGCGTG	1	7	essential	DNAJA3_-_4475855.23-P1P2	GAGGCCCACCTAGAGCCGGG	2	1	essential	DNAJA3_+_4475898.23-P1P2|DNAJA3_-_4475855.23-P1P2
GTF2H3	P1P2	significant	GTF2H3_-_124118399.23-P1P2	GTGCTCTGCGCTGAGGTGCT	1	7	empirical	GTF2H3_-_124118424.23-P1P2	GGCCATGGTTTCAGACGGTG	2	4	empirical	GTF2H3_-_124118399.23-P1P2|GTF2H3_-_124118424.23-P1P2
FLJ45513	NM_001242791	nonessential	FLJ45513_+_47923441.23-NM_001242791	GACCAGGCACAGAAACCCAG	1	1	predicted	FLJ45513_-_47923603.23-NM_001242791	GGGAGCCCCGAGAGCAAGGG	2	2	predicted	FLJ45513_+_47923441.23-NM_001242791|FLJ45513_-_47923603.23-NM_001242791
CTRB1	P1P2	nonessential	CTRB1_+_75252936.23-P1P2	GCCAAAGGCGGCCCCCACAA	1	1	predicted	CTRB1_+_75252970.23-P1P2	GCCCTCAGGACAGACCCCTC	2	2	predicted	CTRB1_+_75252936.23-P1P2|CTRB1_+_75252970.23-P1P2
MSI1	P1P2	nonessential	MSI1_-_120806897.23-P1P2	GGGGCGCGTCAGTCTCCATC	1	1	predicted	MSI1_-_120806970.23-P1P2	GgCTCGGCGCGGGGCAGATG	2	2	predicted	MSI1_-_120806897.23-P1P2|MSI1_-_120806970.23-P1P2
TCP10L	P2	nonessential	TCP10L_+_33954683.23-P2	GCAGACTCCACCAAGAGCTT	1	1	predicted	TCP10L_+_33954508.23-P2	GGGGCAAGAATCGCACACTC	2	2	predicted	TCP10L_+_33954683.23-P2|TCP10L_+_33954508.23-P2
LMAN1L	P1P2	nonessential	LMAN1L_+_75105198.23-P1P2	GGACCTGGACCACTGACCGC	1	1	predicted	LMAN1L_+_75105187.23-P1P2	GCTGACCGCCGGCATCGTGA	2	2	predicted	LMAN1L_+_75105198.23-P1P2|LMAN1L_+_75105187.23-P1P2
SPINT4	P1P2	nonessential	SPINT4_+_44351004.23-P1P2	GCCCAGCTTGGCAGACTTCA	1	1	predicted	SPINT4_+_44351016.23-P1P2	GCTTAGAAGAAATCCCAGCT	2	2	predicted	SPINT4_+_44351004.23-P1P2|SPINT4_+_44351016.23-P1P2
CMTR2	P1P2	significant	CMTR2_+_71323114.23-P1P2	GCGGGAAGCAGCCCCGAGAG	1	7	empirical	CMTR2_-_71323260.23-P1P2	GGGAAGCCAGTCCCACCTCC	2	3	empirical	CMTR2_+_71323114.23-P1P2|CMTR2_-_71323260.23-P1P2
UBAC2	P1P2	nonessential	UBAC2_-_99853142.23-P1P2	GCCTCCCCCGGCGCCCTCTG	1	1	predicted	UBAC2_+_99853181.23-P1P2	GCGGTACTCACAGAGCCCAC	2	2	predicted	UBAC2_-_99853142.23-P1P2|UBAC2_+_99853181.23-P1P2
PSAT1	P1P2	significant	PSAT1_-_80912059.23-P1P2	GCTGCAGACTCTCACCGCAG	1	1	empirical	PSAT1_+_80912504.23-P1P2	GCCCGGACCGGCCCAGGAGA	2	6	empirical	PSAT1_-_80912059.23-P1P2|PSAT1_+_80912504.23-P1P2
CCDC177	ENST00000599174.1	nonessential	CCDC177_+_70040278.23-ENST00000599174.1	GGAACCCGGCGACTCTGGAG	1	1	predicted	CCDC177_+_70040308.23-ENST00000599174.1	GCCAGTGCCTGAAGAAGAGA	2	2	predicted	CCDC177_+_70040278.23-ENST00000599174.1|CCDC177_+_70040308.23-ENST00000599174.1
CDC37	P1P2	nonessential	CDC37_+_10506514.23-P1P2	GGCACCCAATGCCTGGTCAG	1	1	predicted	CDC37_-_10506403.23-P1P2	GATCAGAGGAGGGGACCGGT	2	2	predicted	CDC37_+_10506514.23-P1P2|CDC37_-_10506403.23-P1P2
DAND5	P1P2	nonessential	DAND5_-_13080726.23-P1P2	GCAGCGTGGGCAAGACGAGG	1	1	predicted	DAND5_-_13080723.23-P1P2	GCTGCAGCGTGGGCAAGACG	2	2	predicted	DAND5_-_13080726.23-P1P2|DAND5_-_13080723.23-P1P2
IFNA6	ENST00000380210.1	nonessential	IFNA6_+_21351146.23-ENST00000380210.1	Gatttcttaaaagactctgg	1	1	predicted	IFNA6_-_21350924.23-ENST00000380210.1	GCTGTTGGACTTGTTGAGAT	2	2	predicted	IFNA6_+_21351146.23-ENST00000380210.1|IFNA6_-_21350924.23-ENST00000380210.1
MAGEE2	P1P2	nonessential	MAGEE2_-_75005017.23-P1P2	GAAGGATCAAAAGTGAAATC	1	1	predicted	MAGEE2_-_75004995.23-P1P2	GAAGCCCGAGACCCTGGAGC	2	2	predicted	MAGEE2_-_75005017.23-P1P2|MAGEE2_-_75004995.23-P1P2
TRAPPC3L	P1P2	nonessential	TRAPPC3L_+_116866780.23-P1P2	GGCACTCCTGTCTCAAAGCG	1	1	predicted	TRAPPC3L_-_116866467.23-P1P2	GAATTGATTATTCTTTATGT	2	2	predicted	TRAPPC3L_+_116866780.23-P1P2|TRAPPC3L_-_116866467.23-P1P2
HMGB3	P1P2	significant	HMGB3_-_150152173.23-P1P2	GGGCCGCAGCCGGGAACCCA	1	4	empirical	HMGB3_-_150152182.23-P1P2	GCGGGAACCCAGGGCCCCCG	2	9	empirical	HMGB3_-_150152173.23-P1P2|HMGB3_-_150152182.23-P1P2
FAM166A	P1P2	nonessential	FAM166A_-_140142127.23-P1P2	GCTCACCCAGGGACATAGTG	1	1	predicted	FAM166A_+_140141976.23-P1P2	GAACTGAAGGCCACACCACG	2	2	predicted	FAM166A_-_140142127.23-P1P2|FAM166A_+_140141976.23-P1P2
IWS1	P1P2	significant	IWS1_-_128283989.23-P1P2	GCGGCGGAAAAGGCCGTACC	1	5	empirical	IWS1_-_128284000.23-P1P2	GGCCGTACCCGGCAGGCTGG	2	1	empirical	IWS1_-_128283989.23-P1P2|IWS1_-_128284000.23-P1P2
DNAJB7	P1P2	nonessential	DNAJB7_+_41258041.23-P1P2	GGCCTGAGCTGAGGAAACCA	1	1	predicted	DNAJB7_-_41258046.23-P1P2	GTGCTGGGTATTGAGAACCG	2	2	predicted	DNAJB7_+_41258041.23-P1P2|DNAJB7_-_41258046.23-P1P2
CRP	P1P2	nonessential	CRP_+_159684375.23-P1P2	GGCAGGAGGAGGTAGCTCTA	1	1	predicted	CRP_-_159684353.23-P1P2	GTATTCGGCTGAAAGTTCAG	2	2	predicted	CRP_+_159684375.23-P1P2|CRP_-_159684353.23-P1P2
RAN	P1P2	significant	RAN_+_131356632.23-P1P2	GGCGCCCGTCCGACTGAGGC	1	2	empirical	RAN_+_131356569.23-P1P2	GGACGCCGGCGCGAGAGCAg	2	6	empirical	RAN_+_131356632.23-P1P2|RAN_+_131356569.23-P1P2
MYH15	P1P2	nonessential	MYH15_-_108229422.23-P1P2	GAAAGGCCCTAAACGTGAGT	1	1	predicted	MYH15_-_108229362.23-P1P2	GGAAGGCTGCGGCTTCTCCA	2	2	predicted	MYH15_-_108229422.23-P1P2|MYH15_-_108229362.23-P1P2
SQRDL	P1P2	significant	SQRDL_-_45927322.23-P1P2	GCCCGGGTAAGAGGCATCCG	1	1	predicted	SQRDL_-_45927289.23-P1P2	GGCGCCAACGCAGTGACCGA	2	2	predicted	SQRDL_-_45927322.23-P1P2|SQRDL_-_45927289.23-P1P2
TRNAU1AP	P1P2	significant	TRNAU1AP_-_28879658.23-P1P2	GTGGATGGGCGACGTGAGTG	1	1	empirical	TRNAU1AP_-_28879612.23-P1P2	GCGCCCGCAAAGCCCCACCC	2	4	empirical	TRNAU1AP_-_28879658.23-P1P2|TRNAU1AP_-_28879612.23-P1P2
B9D1	P1P2	nonessential	B9D1_-_19266066.23-P1P2	GGTGAACGGGCGCCGTTATA	1	1	predicted	B9D1_-_19265964.23-P1P2	GGCGTTGCCCTAGAAACAGA	2	2	predicted	B9D1_-_19266066.23-P1P2|B9D1_-_19265964.23-P1P2
SEPHS1	P1P2	significant	SEPHS1_+_13389991.23-P1P2	GCGCAAAGCGAGCCGGTAAg	1	4	empirical	SEPHS1_-_13389894.23-P1P2	Ggcggcgcgcggctccccgg	2	9	empirical	SEPHS1_+_13389991.23-P1P2|SEPHS1_-_13389894.23-P1P2
EIF3F	P1P2	significant	EIF3F_-_8009270.23-P1P2	GCGGGACCCTGTTGGGTGAG	1	3	empirical	EIF3F_+_8009255.23-P1P2	GCTCTGACCACTCACCCAAC	2	6	empirical	EIF3F_-_8009270.23-P1P2|EIF3F_+_8009255.23-P1P2
FAP	P1P2	nonessential	FAP_-_163099892.23-P1P2	GTCTTCAGAGCGTGGGTCAC	1	1	predicted	FAP_-_163099885.23-P1P2	GAATTCTGTCTTCAGAGCGT	2	2	predicted	FAP_-_163099892.23-P1P2|FAP_-_163099885.23-P1P2
ACRC	P1P2	nonessential	ACRC_-_70798376.23-P1P2	GAGAGGCTGCAACACCAGGT	1	1	predicted	ACRC_-_70798359.23-P1P2	GCTGCTGCCGGCCACGCCAG	2	2	predicted	ACRC_-_70798376.23-P1P2|ACRC_-_70798359.23-P1P2
CTSG	P1P2	nonessential	CTSG_-_25045396.23-P1P2	GTGCCTCAGCCCCAGTGGGT	1	1	predicted	CTSG_+_25045383.23-P1P2	GGCCTTTCTCCTACCCACTG	2	2	predicted	CTSG_-_25045396.23-P1P2|CTSG_+_25045383.23-P1P2
SLC28A1	P1	nonessential	SLC28A1_-_85427982.23-P1	GTGGATGCTGACAGAAACAA	1	1	predicted	SLC28A1_-_85428036.23-P1	GGCGGGACTGAAGAAAGGAG	2	2	predicted	SLC28A1_-_85427982.23-P1|SLC28A1_-_85428036.23-P1
TMEM186	P1P2	nonessential	TMEM186_+_8891437.23-P1P2	GCGGGTGGCGAGCCTTGAGG	1	1	predicted	TMEM186_+_8891347.23-P1P2	GGATCCGTGGGAGGAAGCTC	2	2	predicted	TMEM186_+_8891437.23-P1P2|TMEM186_+_8891347.23-P1P2
C1QTNF1	P1P2	nonessential	C1QTNF1_+_77020328.23-P1P2	GAGGTCTCTGCGACCAGAAG	1	1	predicted	C1QTNF1_+_77020294.23-P1P2	GTCGAAAGTAAAGGAAGAGA	2	2	predicted	C1QTNF1_+_77020328.23-P1P2|C1QTNF1_+_77020294.23-P1P2
AK3	P1P2	nonessential	AK3_-_4741156.23-P1P2	GGCCTGCGCGCTCACCCGCT	1	1	predicted	AK3_-_4741205.23-P1P2	GCACTAGCAGGCGGCTACTG	2	2	predicted	AK3_-_4741156.23-P1P2|AK3_-_4741205.23-P1P2
CXorf36	P1P2	nonessential	CXorf36_+_45060067.23-P1P2	GTGGAGCCCAGAGCCCAAGA	1	1	predicted	CXorf36_-_45060127.23-P1P2	GTCCACTCGAGGCTGTACAG	2	2	predicted	CXorf36_+_45060067.23-P1P2|CXorf36_-_45060127.23-P1P2
RIC3	P1P2	nonessential	RIC3_-_8190550.23-P1P2	GACGCCATGACTGCTCACGG	1	1	predicted	RIC3_+_8190532.23-P1P2	GCGACCACCGTGAGCAGTCA	2	2	predicted	RIC3_-_8190550.23-P1P2|RIC3_+_8190532.23-P1P2
SNX6	P1P2	significant	SNX6_-_35098947.23-P1P2	GAGCCGAGCGGCCCCTAGGG	1	10	empirical	SNX6_-_35099101.23-P1P2	GGGTCCCGCGAGCGAAAGGA	2	5	empirical	SNX6_-_35098947.23-P1P2|SNX6_-_35099101.23-P1P2
CNTNAP4	P1P2	nonessential	CNTNAP4_-_76311426.23-P1P2	Ggaaaagacggagggaggtg	1	1	predicted	CNTNAP4_+_76311521.23-P1P2	GTCCCCCAAAAGATCTTGAG	2	2	predicted	CNTNAP4_-_76311426.23-P1P2|CNTNAP4_+_76311521.23-P1P2
IRX4	P1P2	nonessential	IRX4_+_1887038.23-P1P2	GCGACTCCCCGGTGCGTCCC	1	1	predicted	IRX4_-_1886904.23-P1P2	GCTCTGGAGAGCCTAGCGAC	2	2	predicted	IRX4_+_1887038.23-P1P2|IRX4_-_1886904.23-P1P2
UVSSA	P1P2	significant	UVSSA_+_1341452.23-P1P2	GAGTCGCGTCCGGAGAGCAG	1	6	empirical	UVSSA_+_1341437.23-P1P2	GGCAGGGGCGGCCCTAACGG	2	8	empirical	UVSSA_+_1341452.23-P1P2|UVSSA_+_1341437.23-P1P2
HLA-DRA	P1	nonessential	HLA-DRA_+_32407703.23-P1	GTCTTCTTGGGCGCTCTGTT	1	1	predicted	HLA-DRA_+_32407679.23-P1	GTCAGTAGAGCTCGGGAGTG	2	2	predicted	HLA-DRA_+_32407703.23-P1|HLA-DRA_+_32407679.23-P1
IL16	ENST00000302987.4	nonessential	IL16_-_81517944.23-ENST00000302987.4	GCAGCTGGCAGACACATCGG	1	1	predicted	IL16_-_81517653.23-ENST00000302987.4	GCCTCTAGGGACTCATGAAG	2	2	predicted	IL16_-_81517944.23-ENST00000302987.4|IL16_-_81517653.23-ENST00000302987.4
KCNK15	P1P2	nonessential	KCNK15_+_43374594.23-P1P2	GCCCACCAGCAGGTAACACA	1	1	predicted	KCNK15_-_43374521.23-P1P2	GCGGGCACACGGAGCAGGTT	2	2	predicted	KCNK15_+_43374594.23-P1P2|KCNK15_-_43374521.23-P1P2
ARGLU1	P1P2	significant	ARGLU1_+_107220466.23-P1P2	GGCCGCAGCTGCCATCTTAG	1	3	empirical	ARGLU1_-_107220477.23-P1P2	GGCGCCAGGCGCCCCTAAGA	2	4	empirical	ARGLU1_+_107220466.23-P1P2|ARGLU1_-_107220477.23-P1P2
KMT2B	P2	significant	KMT2B_-_36211198.23-P2	GGGGCCAAAAAAGTAAAGAT	1	1	predicted	KMT2B_+_36211136.23-P2	GAAAGGGGAGCCCACCACCT	2	2	predicted	KMT2B_-_36211198.23-P2|KMT2B_+_36211136.23-P2
MED13	P1P2	significant	MED13_-_60142558.23-P1P2	GGCCCCGTTCGGCACGAAGG	1	5	empirical	MED13_+_60142607.23-P1P2	GTCGGAGGCGGCGGTAATGG	2	2	empirical	MED13_-_60142558.23-P1P2|MED13_+_60142607.23-P1P2
LOC81691	P1P2	nonessential	LOC81691_+_20817890.23-P1P2	GACGCAGAAGAGAAGACGGG	1	1	predicted	LOC81691_-_20818232.23-P1P2	GGCGGCACGCGGGGGAATAG	2	2	predicted	LOC81691_+_20817890.23-P1P2|LOC81691_-_20818232.23-P1P2
ATP8A1	P1P2	nonessential	ATP8A1_-_42659065.23-P1P2	GcccgcACGCCGACAGGAGG	1	1	predicted	ATP8A1_-_42659112.23-P1P2	GTGGCGGCGCCCGCAGAGCT	2	2	predicted	ATP8A1_-_42659065.23-P1P2|ATP8A1_-_42659112.23-P1P2
CREB5	ENST00000396300.2	nonessential	CREB5_-_28475286.23-ENST00000396300.2	GGATCTCATTTACCTGAATG	1	1	predicted	CREB5_-_28475317.23-ENST00000396300.2	GTTATTTTCAGGGTAAGTGG	2	2	predicted	CREB5_-_28475286.23-ENST00000396300.2|CREB5_-_28475317.23-ENST00000396300.2
RFK	P1P2	significant	RFK_+_79009281.23-P1P2	GCAGCTCCTCAGGCGCCCGG	1	5	empirical	RFK_+_79009331.23-P1P2	GTCACACCCGGCACTTACTT	2	4	empirical	RFK_+_79009281.23-P1P2|RFK_+_79009331.23-P1P2
GPA33	P1P2	nonessential	GPA33_+_167059568.23-P1P2	GACAGCTCAGACCTGTCTGG	1	1	predicted	GPA33_+_167059549.23-P1P2	GAGGCTGCCAGTGACAGGTT	2	2	predicted	GPA33_+_167059568.23-P1P2|GPA33_+_167059549.23-P1P2
MLKL	P1P2	nonessential	MLKL_+_74734747.23-P1P2	GCAGGGCACCGTGAGCCTGG	1	1	predicted	MLKL_+_74734719.23-P1P2	GGCTGGAGCCACGTCGGAGG	2	2	predicted	MLKL_+_74734747.23-P1P2|MLKL_+_74734719.23-P1P2
PRRC1	P1P2	nonessential	PRRC1_+_126853373.23-P1P2	GAGCTTGGAGAAGACAACGA	1	1	predicted	PRRC1_-_126853368.23-P1P2	GCACGCCGAGGTAACTTCCA	2	2	predicted	PRRC1_+_126853373.23-P1P2|PRRC1_-_126853368.23-P1P2
LOC100129924	NM_001242750	nonessential	LOC100129924_+_43253729.23-NM_001242750	GGGCCAGCCTCACTCACCAA	1	1	predicted	LOC100129924_-_43253758.23-NM_001242750	GGAGTGAGGCTGGCCCATGG	2	2	predicted	LOC100129924_+_43253729.23-NM_001242750|LOC100129924_-_43253758.23-NM_001242750
SH3D21	P1P2	nonessential	SH3D21_+_36772757.23-P1P2	GTGGCAGGATGACCTAGCAC	1	1	predicted	SH3D21_+_36772747.23-P1P2	GACCTAGCACCGGACAAGCG	2	2	predicted	SH3D21_+_36772757.23-P1P2|SH3D21_+_36772747.23-P1P2
ZNF319	P1	nonessential	ZNF319_+_58032350.23-P1	GAAGAGCCCCCATGTCCTGT	1	1	predicted	ZNF319_-_58032344.23-P1	GACCAAGCGGACAGACTACA	2	2	predicted	ZNF319_+_58032350.23-P1|ZNF319_-_58032344.23-P1
ZBED5	P1P2	nonessential	ZBED5_-_10879553.23-P1P2	GCAGCTCAGGGATATCGCCT	1	1	predicted	ZBED5_+_10879548.23-P1P2	GATCTCTATGGAGATGGCCT	2	2	predicted	ZBED5_-_10879553.23-P1P2|ZBED5_+_10879548.23-P1P2
C7orf72	P1P2	nonessential	C7orf72_+_50135482.23-P1P2	GCTCCACCAAAGGAAGAATA	1	1	predicted	C7orf72_-_50135498.23-P1P2	GCATTGCCCTATTCTTCCTT	2	2	predicted	C7orf72_+_50135482.23-P1P2|C7orf72_-_50135498.23-P1P2
C1orf185	P1P2	nonessential	C1orf185_-_51567921.23-P1P2	Ggtcatatggcttcacctaa	1	1	predicted	C1orf185_-_51567935.23-P1P2	Gcctaaaggtatgagaagct	2	2	predicted	C1orf185_-_51567921.23-P1P2|C1orf185_-_51567935.23-P1P2
POMT2	P1P2	nonessential	POMT2_-_77787104.23-P1P2	GCCGCCAAGGAGTCACAAGA	1	1	predicted	POMT2_+_77787134.23-P1P2	GCGCGCTCCGCTGCAGTGAA	2	2	predicted	POMT2_-_77787104.23-P1P2|POMT2_+_77787134.23-P1P2
DYNC1LI1	P1P2	nonessential	DYNC1LI1_+_32612127.23-P1P2	GGGCAGGCGACGACGAGGAC	1	1	predicted	DYNC1LI1_-_32612288.23-P1P2	GTCGGGAATCACACCACTCC	2	2	predicted	DYNC1LI1_+_32612127.23-P1P2|DYNC1LI1_-_32612288.23-P1P2
SLC25A47	P1P2	nonessential	SLC25A47_-_100789714.23-P1P2	GGTGGCACCAAAGCCCTCTC	1	1	predicted	SLC25A47_-_100789718.23-P1P2	GCACCAAAGCCCTCTCAGGC	2	2	predicted	SLC25A47_-_100789714.23-P1P2|SLC25A47_-_100789718.23-P1P2
CTXN3	P1P2	nonessential	CTXN3_+_126984756.23-P1P2	GATTCTGCTTCAGCGAGTAG	1	1	predicted	CTXN3_-_126984841.23-P1P2	GCTCAAAGAAGCAGCAGTAT	2	2	predicted	CTXN3_+_126984756.23-P1P2|CTXN3_-_126984841.23-P1P2
MBTPS2	P1P2	significant	MBTPS2_-_21857794.23-P1P2	GGGCGCGCGCGGTCAGCTGT	1	1	empirical	MBTPS2_-_21857766.23-P1P2	GGGTTCCTGAGCGGATGCTG	2	6	empirical	MBTPS2_-_21857794.23-P1P2|MBTPS2_-_21857766.23-P1P2
FCHSD1	P1P2	nonessential	FCHSD1_+_141030958.23-P1P2	GCTCCAGTTCCGGAGTCCAG	1	1	predicted	FCHSD1_-_141030953.23-P1P2	GCATCTCCGCTCCAGCAAGG	2	2	predicted	FCHSD1_+_141030958.23-P1P2|FCHSD1_-_141030953.23-P1P2
NTS	P1P2	nonessential	NTS_+_86268128.23-P1P2	GAAGTCAGAAGCACACTGAA	1	1	predicted	NTS_-_86268103.23-P1P2	GCACTTTCAAAGCCAGCTGA	2	2	predicted	NTS_+_86268128.23-P1P2|NTS_-_86268103.23-P1P2
MURC	P1P2	nonessential	MURC_-_103340393.23-P1P2	GCAAGTGCCAGAATTGATTG	1	1	predicted	MURC_+_103340546.23-P1P2	GTGCACACTGTCCACGATGG	2	2	predicted	MURC_-_103340393.23-P1P2|MURC_+_103340546.23-P1P2
GDF5	P1P2	significant	GDF5_-_34025625.23-P1P2	GGGTCTCTGGCCCAAGTCAG	1	2	empirical	GDF5_-_34026016.23-P1P2	GCTCCTGCACAACTGACTGA	2	3	empirical	GDF5_-_34025625.23-P1P2|GDF5_-_34026016.23-P1P2
NOBOX	ENST00000223140.5	nonessential	NOBOX_-_144100755.23-ENST00000223140.5	GGGTCTCCACACTCACCCAG	1	1	predicted	NOBOX_+_144100748.23-ENST00000223140.5	GATCCCTGCCAGGGACCGCT	2	2	predicted	NOBOX_-_144100755.23-ENST00000223140.5|NOBOX_+_144100748.23-ENST00000223140.5
PTTG2	P1P2	nonessential	PTTG2_-_37962042.23-P1P2	GTGAATGTGGCTGTTGAGAG	1	1	predicted	PTTG2_+_37962101.23-P1P2	GACATCCTTGGCAGCCACAC	2	2	predicted	PTTG2_-_37962042.23-P1P2|PTTG2_+_37962101.23-P1P2
MAP1LC3A	P1P2	nonessential	MAP1LC3A_+_33146566.23-P1P2	GCTCGCGCTCAAGGGCTCCG	1	1	predicted	MAP1LC3A_+_33146574.23-P1P2	GCTCCGCGCCTCGCGCTCAA	2	2	predicted	MAP1LC3A_+_33146566.23-P1P2|MAP1LC3A_+_33146574.23-P1P2
UBQLNL	P1P2	nonessential	UBQLNL_+_5537859.23-P1P2	GGGGCCACATCTGGAGAACT	1	1	predicted	UBQLNL_-_5537729.23-P1P2	GGCTGGGGCAGAAAGGGTGA	2	2	predicted	UBQLNL_+_5537859.23-P1P2|UBQLNL_-_5537729.23-P1P2
PEMT	P1P2	significant	PEMT_+_17494950.23-P1P2	GGCCCGCGTGGTGCCTCCTG	1	1	predicted	PEMT_+_17494947.23-P1P2	GCGCGTGGTGCCTCCTGAGG	2	2	predicted	PEMT_+_17494950.23-P1P2|PEMT_+_17494947.23-P1P2
C3orf58	P1P2	nonessential	C3orf58_-_143690674.23-P1P2	GAGCCAGCGCGCACAAGCAA	1	1	predicted	C3orf58_-_143690709.23-P1P2	GGACGTGCGTTGCTGCTTGT	2	2	predicted	C3orf58_-_143690674.23-P1P2|C3orf58_-_143690709.23-P1P2
RIT1	P1P2	nonessential	RIT1_+_155881142.23-P1P2	GCGGTTGCGGGAGGGGTCAC	1	1	predicted	RIT1_+_155881114.23-P1P2	GCCGGAGCCTCCGCGAGTGA	2	2	predicted	RIT1_+_155881142.23-P1P2|RIT1_+_155881114.23-P1P2
NECAB3	P2	nonessential	NECAB3_+_32251481.23-P2	GGCAGCAGTACCGGCATCCT	1	1	predicted	NECAB3_-_32251439.23-P2	GGCTGGGCTGGGCTCCCCGG	2	2	predicted	NECAB3_+_32251481.23-P2|NECAB3_-_32251439.23-P2
KCND2	P1P2	nonessential	KCND2_+_119913222.23-P1P2	GCCGCCACGCAGGTTAGGAA	1	1	predicted	KCND2_+_119913274.23-P1P2	GCTAGTGCGATCAATAAATA	2	2	predicted	KCND2_+_119913222.23-P1P2|KCND2_+_119913274.23-P1P2
MLX	P1P2	nonessential	MLX_-_40719148.23-P1P2	GTCCGGTGGGTACAAGATGA	1	1	predicted	MLX_+_40719163.23-P1P2	GCCTTGACCCAAGGGTCCTC	2	2	predicted	MLX_-_40719148.23-P1P2|MLX_+_40719163.23-P1P2
MDM2	P1P2	significant	MDM2_+_69201973.23-P1P2	GGAAGCAGCCAAGCTCGCCG	1	2	empirical	MDM2_-_69202029.23-P1P2	GGCCCTGTGTGTCGGAAAGA	2	3	empirical	MDM2_+_69201973.23-P1P2|MDM2_-_69202029.23-P1P2
POLE4	P1P2	significant	POLE4_-_75185851.23-P1P2	GAGCGGGACGCCCCGAGAGG	1	5	empirical	POLE4_-_75185809.23-P1P2	GAGCACGCTCAAGGCCGGGA	2	6	empirical	POLE4_-_75185851.23-P1P2|POLE4_-_75185809.23-P1P2
STRC	ENST00000450892.2	nonessential	STRC_+_43910967.23-ENST00000450892.2	GTCACCTGGCTATCCCACAC	1	1	predicted	STRC_-_43910947.23-ENST00000450892.2	GAAGTGAACACTGGTACCGG	2	2	predicted	STRC_+_43910967.23-ENST00000450892.2|STRC_-_43910947.23-ENST00000450892.2
ZNF154	P1P2	nonessential	ZNF154_+_58220533.23-P1P2	GTTCTCTGAGGTGTGTTCAC	1	1	predicted	ZNF154_-_58220514.23-P1P2	GCGCCTTCGTGGCCCCAACT	2	2	predicted	ZNF154_+_58220533.23-P1P2|ZNF154_-_58220514.23-P1P2
NODAL	P1P2	nonessential	NODAL_-_72201404.23-P1P2	GACCAGGCGTGCAGAAGGAA	1	1	predicted	NODAL_+_72201368.23-P1P2	GGCCTGGTGGGCCCTACTCC	2	2	predicted	NODAL_-_72201404.23-P1P2|NODAL_+_72201368.23-P1P2
ACTL7B	P1P2	nonessential	ACTL7B_-_111618185.23-P1P2	GCACCCTGAGCCGTGCCCAG	1	1	predicted	ACTL7B_+_111618198.23-P1P2	GAGGGAGGCAGATGGCGACA	2	2	predicted	ACTL7B_-_111618185.23-P1P2|ACTL7B_+_111618198.23-P1P2
GPT2	P1P2	significant	GPT2_-_46918372.23-P1P2	GTGCGGCGAGGGCCTACCAG	1	1	empirical	GPT2_+_46918601.23-P1P2	GCGCTTGCGGAGAGAAACCC	2	3	empirical	GPT2_-_46918372.23-P1P2|GPT2_+_46918601.23-P1P2
DNAJC22	P1P2	nonessential	DNAJC22_-_49740727.23-P1P2	GCCTCTCCAGGCCGAGATGA	1	1	predicted	DNAJC22_+_49740763.23-P1P2	GCCTCGCGGGTGTCACCTCC	2	2	predicted	DNAJC22_-_49740727.23-P1P2|DNAJC22_+_49740763.23-P1P2
CYB5D2	P1P2	nonessential	CYB5D2_-_4047034.23-P1P2	GCAACCTCGGAAGTGCGGAG	1	1	predicted	CYB5D2_-_4047039.23-P1P2	GTCGGAAGTGCGGAGCGGGT	2	2	predicted	CYB5D2_-_4047034.23-P1P2|CYB5D2_-_4047039.23-P1P2
HLA-DQB1	P2	nonessential	HLA-DQB1_+_32632625.23-P2	GACCCGGGCGGAGTTGGACA	1	1	predicted	HLA-DQB1_+_32632674.23-P2	GGCGGCCTGATGCCGAGTAC	2	2	predicted	HLA-DQB1_+_32632625.23-P2|HLA-DQB1_+_32632674.23-P2
IL17RC	P1P2	nonessential	IL17RC_+_9959008.23-P1P2	GCCAAGGACAGCAAGAACCA	1	1	predicted	IL17RC_+_9958827.23-P1P2	GGTTTGTGCACTCTCTGTCC	2	2	predicted	IL17RC_+_9959008.23-P1P2|IL17RC_+_9958827.23-P1P2
NRP1	P1P2	nonessential	NRP1_+_33623748.23-P1P2	GAGACACCCGGACCTCCCCT	1	1	predicted	NRP1_-_33623764.23-P1P2	GTGGCGCCCAGGGGAGGTCC	2	2	predicted	NRP1_+_33623748.23-P1P2|NRP1_-_33623764.23-P1P2
WWC2	P1P2	nonessential	WWC2_-_184020423.23-P1P2	GgggaggaggGTTCGCTCGC	1	1	predicted	WWC2_+_184020619.23-P1P2	GCGGCGGCCTCGCCGGCGAG	2	2	predicted	WWC2_-_184020423.23-P1P2|WWC2_+_184020619.23-P1P2
TSSK3	P1P2	nonessential	TSSK3_-_32828258.23-P1P2	GGAGTAGAGCTGCCTCTCAG	1	1	predicted	TSSK3_-_32828205.23-P1P2	GCGGCTGCGGATGAAGTCCT	2	2	predicted	TSSK3_-_32828258.23-P1P2|TSSK3_-_32828205.23-P1P2
CXCL9	P1P2	nonessential	CXCL9_+_76928619.23-P1P2	GATCCAATACAGGAGTGACT	1	1	predicted	CXCL9_+_76928588.23-P1P2	GCTATCACTATGAAGAAAAG	2	2	predicted	CXCL9_+_76928619.23-P1P2|CXCL9_+_76928588.23-P1P2
UBLCP1	P1P2	significant	UBLCP1_-_158690374.23-P1P2	GTCCACCGCGCTCCAGGTGA	1	4	empirical	UBLCP1_+_158690339.23-P1P2	GGCGGTGGAACCTGCGGCAG	2	1	empirical	UBLCP1_-_158690374.23-P1P2|UBLCP1_+_158690339.23-P1P2
SF3A2	P1	essential	SF3A2_-_2236876.23-P1	GTGGAGGTGGCGAAACGAGG	1	2	essential	SF3A2_-_2236863.23-P1	GCCAAACGAAGTCGTGGAGG	2	5	essential	SF3A2_-_2236876.23-P1|SF3A2_-_2236863.23-P1
MTMR9	P1P2	significant	MTMR9_+_11142357.23-P1P2	GCCAGGGAACCGAGCCCGGT	1	3	empirical	MTMR9_+_11142347.23-P1P2	GGAGCCCGGTAGGTGCGAGG	2	5	empirical	MTMR9_+_11142357.23-P1P2|MTMR9_+_11142347.23-P1P2
C14orf169	P1P2	significant	C14orf169_-_73957709.23-P1P2	GccggccgggcggggAAGAC	1	6	empirical	C14orf169_+_73957720.23-P1P2	GCTGGCCTGGAGCCCATCCA	2	5	empirical	C14orf169_-_73957709.23-P1P2|C14orf169_+_73957720.23-P1P2
NHP2L1	P1P2	significant	NHP2L1_-_42084601.23-P1P2	GCACAGCTGCGGGGATCCTA	1	6	empirical	NHP2L1_+_42084750.23-P1P2	GCCGGGAAGCGGGAGACTCA	2	5	empirical	NHP2L1_-_42084601.23-P1P2|NHP2L1_+_42084750.23-P1P2
SIGLEC1	P1P2	nonessential	SIGLEC1_-_3687813.23-P1P2	GCTCCTGTTGCCTAAGAGGG	1	1	predicted	SIGLEC1_+_3687496.23-P1P2	GACCCCTGGGGCACTGAGAA	2	2	predicted	SIGLEC1_-_3687813.23-P1P2|SIGLEC1_+_3687496.23-P1P2
TTC18	P1P2	nonessential	TTC18_+_75118480.23-P1P2	GGTTGTCAAAAACATAACTG	1	1	predicted	TTC18_-_75118390.23-P1P2	GCTAAGGGAGCAGAAGATCG	2	2	predicted	TTC18_+_75118480.23-P1P2|TTC18_-_75118390.23-P1P2
TNFRSF13B	P1P2	nonessential	TNFRSF13B_-_16875396.23-P1P2	GCCCAGGCCACTCATTACTC	1	1	predicted	TNFRSF13B_-_16875350.23-P1P2	GGCGCTCCTCCTGGTCCACA	2	2	predicted	TNFRSF13B_-_16875396.23-P1P2|TNFRSF13B_-_16875350.23-P1P2
ELMO1	P1P2	significant	ELMO1_-_37488469.23-P1P2	GGCACACGCACTTACACTCT	1	4	empirical	ELMO1_+_37488419.23-P1P2	GAGCGGGAGCGGGCGAGGAT	2	1	empirical	ELMO1_-_37488469.23-P1P2|ELMO1_+_37488419.23-P1P2
SPP1	P2	nonessential	SPP1_+_88901270.23-P2	GAAGTTTAAAAATACCTGTG	1	1	predicted	SPP1_-_88901445.23-P2	GGTTAAGCCATCCACAGATG	2	2	predicted	SPP1_+_88901270.23-P2|SPP1_-_88901445.23-P2
OR1L4	ENST00000259466.1	nonessential	OR1L4_-_125486388.23-ENST00000259466.1	GATCATGTACCTACTCACTG	1	1	predicted	OR1L4_+_125486375.23-ENST00000259466.1	GATTCCCCACCGCAGTGAGT	2	2	predicted	OR1L4_-_125486388.23-ENST00000259466.1|OR1L4_+_125486375.23-ENST00000259466.1
ZNF747	P1P2	nonessential	ZNF747_-_30546113.23-P1P2	GCCCCGAAGGCCCACTAGAG	1	1	predicted	ZNF747_-_30546158.23-P1P2	GGCGAGTCCATGGTCAGAAC	2	2	predicted	ZNF747_-_30546113.23-P1P2|ZNF747_-_30546158.23-P1P2
DCAKD	P2	nonessential	DCAKD_-_43138427.23-P2	GGCGGCCGCCCGGTTCCCAA	1	1	predicted	DCAKD_+_43138433.23-P2	GGAAGGGGCGCAAGGTTGGT	2	2	predicted	DCAKD_-_43138427.23-P2|DCAKD_+_43138433.23-P2
SMAD1	P1P2	significant	SMAD1_+_146403428.23-P1P2	GGGCTGGGCGCGAGAAGACG	1	2	empirical	SMAD1_+_146403396.23-P1P2	GGCTCCTCCGAGCAGACGGG	2	5	empirical	SMAD1_+_146403428.23-P1P2|SMAD1_+_146403396.23-P1P2
OR1L8	ENST00000304865.2	nonessential	OR1L8_-_125330597.23-ENST00000304865.2	GCATAGGGGTCTGAAGATGG	1	1	predicted	OR1L8_-_125330660.23-ENST00000304865.2	GGGTGACCAGGTACACGATG	2	2	predicted	OR1L8_-_125330597.23-ENST00000304865.2|OR1L8_-_125330660.23-ENST00000304865.2
ZNF23	P2	nonessential	ZNF23_-_71523229.23-P2	GACCGCTAGCGAGAACGGTT	1	1	predicted	ZNF23_-_71523156.23-P2	GCCAAGCTCCGCCCAACTGT	2	2	predicted	ZNF23_-_71523229.23-P2|ZNF23_-_71523156.23-P2
DIRC2	P1P2	nonessential	DIRC2_+_122513682.23-P1P2	GGGCTGTATTCGAGGAGGTT	1	1	predicted	DIRC2_-_122513921.23-P1P2	GAGGCGCACCAGGCGCGGTC	2	2	predicted	DIRC2_+_122513682.23-P1P2|DIRC2_-_122513921.23-P1P2
PODXL2	P1P2	nonessential	PODXL2_+_127348092.23-P1P2	Ggcagcggcgaaagcagcgg	1	1	predicted	PODXL2_-_127348066.23-P1P2	Ggcggcgacggctacaccat	2	2	predicted	PODXL2_+_127348092.23-P1P2|PODXL2_-_127348066.23-P1P2
ZNF419	P1P2	nonessential	ZNF419_-_57999200.23-P1P2	GCCAGCGCCGGAAGGCACGG	1	1	predicted	ZNF419_-_57999197.23-P1P2	GCGACCAGCGCCGGAAGGCA	2	2	predicted	ZNF419_-_57999200.23-P1P2|ZNF419_-_57999197.23-P1P2
ZNF331	P1	nonessential	ZNF331_-_54058166.23-P1	GCGCTCTGGGGGATATGTGG	1	1	predicted	ZNF331_+_54058120.23-P1	GCTCACAGAACAGAGTCCCG	2	2	predicted	ZNF331_-_54058166.23-P1|ZNF331_+_54058120.23-P1
FSCB	P1P2	nonessential	FSCB_+_44976438.23-P1P2	GGACGCTTACTGAATAAGGT	1	1	predicted	FSCB_+_44976416.23-P1P2	GATCCAACAAGAGTGTAGTA	2	2	predicted	FSCB_+_44976438.23-P1P2|FSCB_+_44976416.23-P1P2
PCDHB12	P1P2	nonessential	PCDHB12_-_140588309.23-P1P2	GCCAGTACACGCGGAGAACT	1	1	predicted	PCDHB12_-_140588405.23-P1P2	GGATTTGGTAGACAGATCAG	2	2	predicted	PCDHB12_-_140588309.23-P1P2|PCDHB12_-_140588405.23-P1P2
ATXN10	P1P2	essential	ATXN10_+_46067906.23-P1P2	GTGGGTCGAGCCTGACgagg	1	1	essential	ATXN10_-_46067769.23-P1P2	GTCAGCCTAGAGCTCTCCGG	2	2	essential	ATXN10_+_46067906.23-P1P2|ATXN10_-_46067769.23-P1P2
KIAA1731	P1P2	significant	KIAA1731_+_93395217.23-P1P2	GCACGGAAGCTCCGCGACAG	1	7	empirical	KIAA1731_-_93394845.23-P1P2	GTCGGCGATGGCTCTCCCGC	2	2	empirical	KIAA1731_+_93395217.23-P1P2|KIAA1731_-_93394845.23-P1P2
PARN	P1P2	significant	PARN_+_14724082.23-P1P2	Ggcggccggcgtcaccgctg	1	2	empirical	PARN_+_14724027.23-P1P2	GTCGGCGAGTAGAACCGCTG	2	3	empirical	PARN_+_14724082.23-P1P2|PARN_+_14724027.23-P1P2
GPR35	P1	nonessential	GPR35_+_241565002.23-P1	GCCCCGCTGGGAGGCCCCTA	1	1	predicted	GPR35_+_241564907.23-P1	GCACAGTGGCTGTCTGAGAA	2	2	predicted	GPR35_+_241565002.23-P1|GPR35_+_241564907.23-P1
SLC7A7	P1P2	nonessential	SLC7A7_-_23284581.23-P1P2	GGCAGTGTGAGCAGCAGTCA	1	1	predicted	SLC7A7_+_23284591.23-P1P2	GTCAGACCACAGATCCTGGA	2	2	predicted	SLC7A7_-_23284581.23-P1P2|SLC7A7_+_23284591.23-P1P2
POLR3H	P1P2	significant	POLR3H_+_41940181.23-P1P2	GCGACTGGGACGGGACCAAG	1	4	empirical	POLR3H_+_41940057.23-P1P2	GCACCGTCCGGATCCCCCCT	2	3	empirical	POLR3H_+_41940181.23-P1P2|POLR3H_+_41940057.23-P1P2
FAM47C	P1P2	nonessential	FAM47C_-_37026463.23-P1P2	GACCGCGGAAACTGGAGAGG	1	1	predicted	FAM47C_+_37026443.23-P1P2	GGCCACCTCTCCAGTTTCCG	2	2	predicted	FAM47C_-_37026463.23-P1P2|FAM47C_+_37026443.23-P1P2
CREB3	P1P2	significant	CREB3_-_35732659.23-P1P2	GAGCCGCCGGCGGGGAATCC	1	6	empirical	CREB3_+_35732428.23-P1P2	GACCCCGAGGGCGGGGGTTC	2	2	empirical	CREB3_-_35732659.23-P1P2|CREB3_+_35732428.23-P1P2
LZTS2	P1	nonessential	LZTS2_-_102759590.23-P1	GtgggCCGGGCAGCTCCGAG	1	1	predicted	LZTS2_+_102759798.23-P1	GCCCCCCTTCCAGAAAGTGG	2	2	predicted	LZTS2_-_102759590.23-P1|LZTS2_+_102759798.23-P1
OR2AG2	ENST00000338569.2	nonessential	OR2AG2_-_6790231.23-ENST00000338569.2	GGAACCAAATATATTATCAG	1	1	predicted	OR2AG2_-_6790089.23-ENST00000338569.2	GGGTCAGTGCCAACATGTAT	2	2	predicted	OR2AG2_-_6790231.23-ENST00000338569.2|OR2AG2_-_6790089.23-ENST00000338569.2
METTL7A	P1P2	nonessential	METTL7A_+_51318831.23-P1P2	GGCCAGTCTCAGGATAAAGA	1	1	predicted	METTL7A_+_51319084.23-P1P2	GGGTCACCCTGCACCCAGGT	2	2	predicted	METTL7A_+_51318831.23-P1P2|METTL7A_+_51319084.23-P1P2
COMMD2	P1P2	nonessential	COMMD2_+_149470240.23-P1P2	GCGCTGCCGGGTGAAATCGT	1	1	predicted	COMMD2_+_149470262.23-P1P2	GGAAGTGGCGAAGGCGGGGT	2	2	predicted	COMMD2_+_149470240.23-P1P2|COMMD2_+_149470262.23-P1P2
CDK14	P1P2	nonessential	CDK14_+_90225779.23-P1P2	GAGGGAGGCGAGCAGCAGGC	1	1	predicted	CDK14_+_90225794.23-P1P2	GGCGACGCGCAGGTCTAGGG	2	2	predicted	CDK14_+_90225779.23-P1P2|CDK14_+_90225794.23-P1P2
CHRNE	P1P2	nonessential	CHRNE_-_4806328.23-P1P2	GCGTACCGAGAAGCCCCAAG	1	1	predicted	CHRNE_+_4806299.23-P1P2	GGGCTTCTCGGTACGGACAG	2	2	predicted	CHRNE_-_4806328.23-P1P2|CHRNE_+_4806299.23-P1P2
CAST	P2	significant	CAST_-_95997966.23-P2	GATCGGGGCTAGGGGAACCC	1	2	empirical	CAST_-_95998431.23-P2	GTGGCGTTGGCCGGGTAGAG	2	4	empirical	CAST_-_95997966.23-P2|CAST_-_95998431.23-P2
PHF12	P1P2	significant	PHF12_+_27278322.23-P1P2	GGATACCCCCAGCCCCGGGA	1	2	empirical	PHF12_+_27278232.23-P1P2	GCCCGCCGAGGCCTGACCCC	2	10	empirical	PHF12_+_27278322.23-P1P2|PHF12_+_27278232.23-P1P2
CCL3	P1P2	nonessential	CCL3_+_34417463.23-P1P2	GGGACACGGGCAGCAGACAG	1	1	predicted	CCL3_-_34417416.23-P1P2	GGACCTGCATGATTCTGAGC	2	2	predicted	CCL3_+_34417463.23-P1P2|CCL3_-_34417416.23-P1P2
URB2	P1P2	significant	URB2_-_229762001.23-P1P2	GGGACGCGGGACCCGTACAG	1	1	empirical	URB2_+_229762047.23-P1P2	GGACAGCTCCGGGTAGACAG	2	2	empirical	URB2_-_229762001.23-P1P2|URB2_+_229762047.23-P1P2
GORASP2	P1P2	nonessential	GORASP2_-_171785788.23-P1P2	GCTACGCGGAGGATTAGAGC	1	1	predicted	GORASP2_-_171785801.23-P1P2	GTAGAGCAGGCGGTGCGCTG	2	2	predicted	GORASP2_-_171785788.23-P1P2|GORASP2_-_171785801.23-P1P2
OR5AN1	ENST00000313940.2	nonessential	OR5AN1_-_59131941.23-ENST00000313940.2	GGCACTGAGCCAATGACTGG	1	1	predicted	OR5AN1_-_59131938.23-ENST00000313940.2	GGGAGCACTGAGCCAATGAC	2	2	predicted	OR5AN1_-_59131941.23-ENST00000313940.2|OR5AN1_-_59131938.23-ENST00000313940.2
TTC7B	P1P2	significant	TTC7B_-_91282588.23-P1P2	GCTCCCACTGGCACTCGGAG	1	1	empirical	TTC7B_+_91282749.23-P1P2	GcggcgctcccgTTACGCCG	2	2	empirical	TTC7B_-_91282588.23-P1P2|TTC7B_+_91282749.23-P1P2
C3orf52	P1P2	nonessential	C3orf52_-_111805313.23-P1P2	GGGAGCTCTCGGTGCTCGAG	1	1	predicted	C3orf52_+_111805269.23-P1P2	GGCTCGTCTACTGGCTGTGA	2	2	predicted	C3orf52_-_111805313.23-P1P2|C3orf52_+_111805269.23-P1P2
CTAG2	ENST00000369585.3	nonessential	CTAG2_-_153881561.23-ENST00000369585.3	GCGGCCTCCTGGCCCCGCAG	1	1	predicted	CTAG2_+_153881436.23-ENST00000369585.3	GCAACAGGGTCAAgaggtgg	3	3	predicted	CTAG2_-_153881561.23-ENST00000369585.3|CTAG2_+_153881436.23-ENST00000369585.3
SMURF1	P1P2	nonessential	SMURF1_+_98741675.23-P1P2	Gcgggcgtccggctctgagg	1	1	predicted	SMURF1_+_98741478.23-P1P2	GCGGAGCCGTAACCTTGAGG	2	2	predicted	SMURF1_+_98741675.23-P1P2|SMURF1_+_98741478.23-P1P2
PEX11G	P1P2	nonessential	PEX11G_+_7553849.23-P1P2	GCGGCGCTGGAGTCGTACAG	1	1	predicted	PEX11G_+_7553830.23-P1P2	GGGGCCGGGACCGCCTGGTG	2	2	predicted	PEX11G_+_7553849.23-P1P2|PEX11G_+_7553830.23-P1P2
C17orf80	P1P2	nonessential	C17orf80_-_71228594.23-P1P2	GGAAAGGACCTCCCCTGGGG	1	1	predicted	C17orf80_+_71228807.23-P1P2	GCCCGGCGACAAGCCCCCCA	2	2	predicted	C17orf80_-_71228594.23-P1P2|C17orf80_+_71228807.23-P1P2
TEX35	P1P2	nonessential	TEX35_+_178482315.23-P1P2	GCTCTTGGCCGACATGATGG	1	1	predicted	TEX35_+_178482312.23-P1P2	GTTGGCCGACATGATGGAGG	2	2	predicted	TEX35_+_178482315.23-P1P2|TEX35_+_178482312.23-P1P2
PCDH1	P1P2	nonessential	PCDH1_-_141257981.23-P1P2	GGCTCCCCGAGTGTGTGAgg	1	1	predicted	PCDH1_+_141257964.23-P1P2	GgccgccgccTCACACACTC	2	2	predicted	PCDH1_-_141257981.23-P1P2|PCDH1_+_141257964.23-P1P2
NAB2	P1P2	nonessential	NAB2_-_57482932.23-P1P2	GGGCTCGGAGAGAGAAGACG	1	1	predicted	NAB2_-_57482935.23-P1P2	GTCGGAGAGAGAAGACGTGG	2	2	predicted	NAB2_-_57482932.23-P1P2|NAB2_-_57482935.23-P1P2
TMEM247	ENST00000434431.1	nonessential	TMEM247_+_46706695.23-ENST00000434431.1	GACCAGAACGCTGCCAGGTG	1	1	predicted	TMEM247_+_46706866.23-ENST00000434431.1	GCCCCTGACGGAATAGGCGG	2	2	predicted	TMEM247_+_46706695.23-ENST00000434431.1|TMEM247_+_46706866.23-ENST00000434431.1
NMT1	P1P2	nonessential	NMT1_-_43138703.23-P1P2	GCTCTCGCAACTCAAGATGG	1	1	predicted	NMT1_-_43138762.23-P1P2	GGCTGCCGCAGATGATGGAA	2	2	predicted	NMT1_-_43138703.23-P1P2|NMT1_-_43138762.23-P1P2
CYTH4	P1P2	nonessential	CYTH4_-_37678539.23-P1P2	GCAAGGTGACGCATCCTTGC	1	1	predicted	CYTH4_-_37678584.23-P1P2	GCGGCAAGCGACAGGAGCAC	2	2	predicted	CYTH4_-_37678539.23-P1P2|CYTH4_-_37678584.23-P1P2
C17orf85	P1P2	significant	C17orf85_-_3749509.23-P1P2	GGACACCCGCAGGCCCCGTA	1	2	empirical	C17orf85_+_3749530.23-P1P2	GGGGCGGGCTCTCAGTGGTG	2	8	empirical	C17orf85_-_3749509.23-P1P2|C17orf85_+_3749530.23-P1P2
WWC1	P1P2	nonessential	WWC1_+_167718961.23-P1P2	GCGGCCCTGCAGCCCCGACC	1	1	predicted	WWC1_-_167718718.23-P1P2	GGAGGCAGAAGTCACAAACC	2	2	predicted	WWC1_+_167718961.23-P1P2|WWC1_-_167718718.23-P1P2
ALOX12B	P1P2	significant	ALOX12B_+_7990948.23-P1P2	GGCACCCACCCCGGCCACCA	1	6	empirical	ALOX12B_-_7991020.23-P1P2	GGGTGAGTGAGCAGGTGTCT	1	1	predicted	ALOX12B_+_7990948.23-P1P2|ALOX12B_-_7991020.23-P1P2
PPEF2	P1P2	nonessential	PPEF2_+_76823539.23-P1P2	GGAAGAAGACATGGCAGACT	1	1	predicted	PPEF2_+_76823587.23-P1P2	GCACTGTGAATACTTGGCCA	2	2	predicted	PPEF2_+_76823539.23-P1P2|PPEF2_+_76823587.23-P1P2
CRAMP1L	P2	significant	CRAMP1L_+_1664225.23-P2	GCCCACAGCCACCTACCCGG	1	1	predicted	CRAMP1L_+_1664217.23-P2	GCACCTACCCGGCGGGGCCG	2	2	predicted	CRAMP1L_+_1664225.23-P2|CRAMP1L_+_1664217.23-P2
OR10A4	ENST00000379829.2	nonessential	OR10A4_+_6897933.23-ENST00000379829.2	GGCCTGAAGCTCAGTGGACA	1	1	predicted	OR10A4_-_6897887.23-ENST00000379829.2	GCTGGGCAGAAGAATGATGT	2	2	predicted	OR10A4_+_6897933.23-ENST00000379829.2|OR10A4_-_6897887.23-ENST00000379829.2
GSDMB	P1P2	nonessential	GSDMB_+_38074618.23-P1P2	GCTGGGCAGAAGGGATATAG	1	1	predicted	GSDMB_+_38074860.23-P1P2	GTTAGCTTCCTGAGATTCAG	2	2	predicted	GSDMB_+_38074618.23-P1P2|GSDMB_+_38074860.23-P1P2
SLC37A1	P1P2	nonessential	SLC37A1_-_43933987.23-P1P2	GCGCGAGCAGGAAgcgcccg	1	1	predicted	SLC37A1_+_43934144.23-P1P2	GCCCGCGCCCGGCTCCCTGA	2	2	predicted	SLC37A1_-_43933987.23-P1P2|SLC37A1_+_43934144.23-P1P2
GDPD1	P1P2	nonessential	GDPD1_-_57297945.23-P1P2	GAGTTCAGAGGGCCCGGAGG	1	1	predicted	GDPD1_+_57297915.23-P1P2	GGGCCCTCTGAACTCCgctg	2	2	predicted	GDPD1_-_57297945.23-P1P2|GDPD1_+_57297915.23-P1P2
RPP38	P1P2	significant	RPP38_+_15139555.23-P1P2	GCTGGGCGGCCCAACCGGGA	1	4	empirical	RPP38_+_15139358.23-P1P2	GCACCTGAAGGCAACAGCAC	2	5	empirical	RPP38_+_15139555.23-P1P2|RPP38_+_15139358.23-P1P2
KCNA4	P1P2	nonessential	KCNA4_+_30038363.23-P1P2	GAGTCTTGGGGTCTTCTCTG	1	1	predicted	KCNA4_+_30038176.23-P1P2	GCAGCTGTTGCAGCTTGAGG	2	2	predicted	KCNA4_+_30038363.23-P1P2|KCNA4_+_30038176.23-P1P2
ESCO1	P1P2	significant	ESCO1_-_19180570.23-P1P2	GCAGGCGGCGGGGACCGTCA	1	4	empirical	ESCO1_+_19180562.23-P1P2	GGGTACGCGAGCGTCCCTGA	1	1	predicted	ESCO1_-_19180570.23-P1P2|ESCO1_+_19180562.23-P1P2
POLH	P1P2	nonessential	POLH_+_43543948.23-P1P2	GAGCAGGGATCAGACGAGAG	1	1	predicted	POLH_+_43543917.23-P1P2	GCAATGCAGCCGCCAGACTG	2	2	predicted	POLH_+_43543948.23-P1P2|POLH_+_43543917.23-P1P2
SH3GL1	P1P2	nonessential	SH3GL1_+_4400263.23-P1P2	GCCCCGGGCTGCCCGGATGA	1	1	predicted	SH3GL1_+_4400350.23-P1P2	GCGGCAGCATGTCGGTGGCG	2	2	predicted	SH3GL1_+_4400263.23-P1P2|SH3GL1_+_4400350.23-P1P2
UFD1L	P1P2	significant	UFD1L_+_19466662.23-P1P2	GCGGCTGGGAGAGCGGTCGG	1	2	empirical	UFD1L_+_19466494.23-P1P2	GcggAGGTGCCGAGTCACCC	2	1	empirical	UFD1L_+_19466662.23-P1P2|UFD1L_+_19466494.23-P1P2
SPRED2	ENST00000443619.2	nonessential	SPRED2_+_65593861.23-ENST00000443619.2	GGAGACTGAATCATATATGG	1	1	predicted	SPRED2_+_65593864.23-ENST00000443619.2	GAAGGAGACTGAATCATATA	2	2	predicted	SPRED2_+_65593861.23-ENST00000443619.2|SPRED2_+_65593864.23-ENST00000443619.2
PRKAB2	P1P2	nonessential	PRKAB2_+_146643991.23-P1P2	GCCCGAGGTGACTGGAGTGG	1	1	predicted	PRKAB2_+_146644006.23-P1P2	GGGAGGGAGCGCATCGCCCG	2	2	predicted	PRKAB2_+_146643991.23-P1P2|PRKAB2_+_146644006.23-P1P2
OR51A4	ENST00000380373.2	nonessential	OR51A4_-_4968377.23-ENST00000380373.2	GAAAATACAGATGCTTGTGT	1	1	predicted	OR51A4_-_4968056.23-ENST00000380373.2	GAGGCATTGGATGAAATTTC	2	2	predicted	OR51A4_-_4968377.23-ENST00000380373.2|OR51A4_-_4968056.23-ENST00000380373.2
ZMYM6	P1P2	significant	ZMYM6_+_35496907.23-P1P2	GTGTGAAGCGGGGCTCTGAG	1	4	empirical	ZMYM6_-_35497259.23-P1P2	GTGTGGTCTCCGACTGAGAG	2	6	empirical	ZMYM6_+_35496907.23-P1P2|ZMYM6_-_35497259.23-P1P2
NWD1	P1P2	nonessential	NWD1_-_16830833.23-P1P2	GACCAGCAAAGGCTAAAGAG	1	1	predicted	NWD1_-_16830822.23-P1P2	GGTCGTTCAACTACCAGCAA	2	2	predicted	NWD1_-_16830833.23-P1P2|NWD1_-_16830822.23-P1P2
SYCP3	P1P2	nonessential	SYCP3_+_102133209.23-P1P2	GGCGGAGAAGGGGCCACCTC	1	1	predicted	SYCP3_-_102133215.23-P1P2	GCACAAGCGCGCTTCACCTG	2	2	predicted	SYCP3_+_102133209.23-P1P2|SYCP3_-_102133215.23-P1P2
EEA1	P1P2	nonessential	EEA1_-_93323052.23-P1P2	GAGAGAGCGAGCGAACGACT	1	1	predicted	EEA1_-_93323009.23-P1P2	GGCGGCCCCGACTTCCCCAC	2	2	predicted	EEA1_-_93323052.23-P1P2|EEA1_-_93323009.23-P1P2
C16orf58	P1P2	nonessential	C16orf58_-_31519666.23-P1P2	GCGAACTGCTCGGAACACAG	1	1	predicted	C16orf58_+_31519695.23-P1P2	GGGGCTGGGATCCAAAAGCT	2	2	predicted	C16orf58_-_31519666.23-P1P2|C16orf58_+_31519695.23-P1P2
FATE1	P1P2	nonessential	FATE1_+_150884546.23-P1P2	GGCTATGGCTAAGGATGCAC	1	1	predicted	FATE1_+_150884561.23-P1P2	GGCTGTTCTCTTGTAAGCTA	2	2	predicted	FATE1_+_150884546.23-P1P2|FATE1_+_150884561.23-P1P2
B3GAT2	P1P2	nonessential	B3GAT2_+_71666744.23-P1P2	GCTTGCTGCTGGATCCGGAG	1	1	predicted	B3GAT2_+_71666697.23-P1P2	GTGAGAGCAGGCTTCCGCTG	2	2	predicted	B3GAT2_+_71666744.23-P1P2|B3GAT2_+_71666697.23-P1P2
CXCL13	ENST00000286758.4	nonessential	CXCL13_+_78432964.23-ENST00000286758.4	GCAGCCACTGGAGAATTGGT	1	1	predicted	CXCL13_-_78432949.23-ENST00000286758.4	GACTCTGCTAATGAGGTGAG	2	2	predicted	CXCL13_+_78432964.23-ENST00000286758.4|CXCL13_-_78432949.23-ENST00000286758.4
SRD5A3	P1P2	significant	SRD5A3_+_56212439.23-P1P2	GCCGCTAGCCCGCGGAAGAG	1	2	empirical	SRD5A3_-_56212515.23-P1P2	GACGCGGGCCATGGCTCCCT	2	4	empirical	SRD5A3_+_56212439.23-P1P2|SRD5A3_-_56212515.23-P1P2
TMEM205	P1P2	nonessential	TMEM205_+_11456946.23-P1P2	GGGCGGGACGAATTATTGGT	1	1	predicted	TMEM205_+_11456950.23-P1P2	GGGGAGGCGGGACGAATTAT	2	2	predicted	TMEM205_+_11456946.23-P1P2|TMEM205_+_11456950.23-P1P2
ZNF639	P1P2	nonessential	ZNF639_-_179040855.23-P1P2	GGCGCGGAGCGTGGCGGCCA	1	1	predicted	ZNF639_+_179040813.23-P1P2	GCCTGCGCCGCGCACCTCAG	2	2	predicted	ZNF639_-_179040855.23-P1P2|ZNF639_+_179040813.23-P1P2
ARAP1	P2	nonessential	ARAP1_+_72463419.23-P2	GCGGTGGCGGTGTAAGTCGG	1	1	predicted	ARAP1_+_72463416.23-P2	GTGGCGGTGTAAGTCGGTGG	2	2	predicted	ARAP1_+_72463419.23-P2|ARAP1_+_72463416.23-P2
HAMP	P1P2	nonessential	HAMP_+_35771624.23-P1P2	GCTCCTCATCCACACCACGT	1	1	predicted	HAMP_+_35773493.23-P1P2	GAGGCAAGCGGCCCAGATCT	2	2	predicted	HAMP_+_35771624.23-P1P2|HAMP_+_35773493.23-P1P2
PSMD4	P1P2	essential	PSMD4_-_151227239.23-P1P2	GCCGTCCCGGAGACCCGGTC	1	1	essential	PSMD4_-_151227243.23-P1P2	GCCCGGAGACCCGGTCGGGA	2	5	essential	PSMD4_-_151227239.23-P1P2|PSMD4_-_151227243.23-P1P2
LGALS7	ENST00000378626.4	nonessential	LGALS7_+_39263633.23-ENST00000378626.4	GGGTGAGGCCCCAGGCCCTA	1	1	predicted	LGALS7_-_39263666.23-ENST00000378626.4	GGGGCCTCACCTGCTGGCAT	2	2	predicted	LGALS7_+_39263633.23-ENST00000378626.4|LGALS7_-_39263666.23-ENST00000378626.4
CITED4	P1P2	nonessential	CITED4_+_41327960.23-P1P2	GCCGCAAGGTGCGCAGTAGT	1	1	predicted	CITED4_-_41327994.23-P1P2	GACCTTGCGGCCGCAGCCTG	2	2	predicted	CITED4_+_41327960.23-P1P2|CITED4_-_41327994.23-P1P2
LARS	P1P2	significant	LARS_+_145561989.23-P1P2	GCGGACTGGCCAGTCTCTAG	1	1	empirical	LARS_-_145562203.23-P1P2	GACCTGCTGAGGCAATCATC	2	5	empirical	LARS_+_145561989.23-P1P2|LARS_-_145562203.23-P1P2
ANKRD39	P1P2	significant	ANKRD39_+_97523562.23-P1P2	GCGGCCCAAGGAGGAGGCGT	1	10	empirical	ANKRD39_-_97523708.23-P1P2	GAGCAGGGCCCGTCCGCGCA	2	1	empirical	ANKRD39_+_97523562.23-P1P2|ANKRD39_-_97523708.23-P1P2
CDH15	P1P2	nonessential	CDH15_+_89238234.23-P1P2	GAGGAACGCGGCGTCCATCG	1	1	predicted	CDH15_-_89238216.23-P1P2	GTCGGGTCGCGGGTGCACTC	2	2	predicted	CDH15_+_89238234.23-P1P2|CDH15_-_89238216.23-P1P2
OVGP1	P1	nonessential	OVGP1_-_111965659.23-P1	GAGCAGTGCCTCCTTCCGGA	1	1	predicted	OVGP1_-_111965680.23-P1	GGCAAACAGGAGCTCCTAAG	2	2	predicted	OVGP1_-_111965659.23-P1|OVGP1_-_111965680.23-P1
POFUT1	P1P2	nonessential	POFUT1_-_30795748.23-P1P2	GCGGGTTCCCGGGCCGACAT	1	1	predicted	POFUT1_+_30795702.23-P1P2	GCAGCCGCGGCGCACAGTCG	2	2	predicted	POFUT1_-_30795748.23-P1P2|POFUT1_+_30795702.23-P1P2
POGLUT1	P1P2	significant	POGLUT1_-_119187880.23-P1P2	GCTGCCGGCGATGGAGTGGT	1	1	empirical	POGLUT1_-_119187876.23-P1P2	GAGGTCTGCCGGCGATGGAG	2	2	empirical	POGLUT1_-_119187880.23-P1P2|POGLUT1_-_119187876.23-P1P2
HSD17B14	P1P2	nonessential	HSD17B14_-_49339732.23-P1P2	GTCACCTCCAAAGCCCCGTG	1	1	predicted	HSD17B14_+_49339714.23-P1P2	GCGGCCTCACGGGGCTTTGG	2	2	predicted	HSD17B14_-_49339732.23-P1P2|HSD17B14_+_49339714.23-P1P2
ST14	P1P2	nonessential	ST14_+_130029743.23-P1P2	GGCCCAGCGCGCCCGACCGG	1	1	predicted	ST14_-_130029737.23-P1P2	GAGAGAGCGCGCCAGGGCGA	2	2	predicted	ST14_+_130029743.23-P1P2|ST14_-_130029737.23-P1P2
ZNHIT1	P1P2	significant	ZNHIT1_-_100861047.23-P1P2	GACGGAGGCCTGGGGGAACT	1	8	empirical	ZNHIT1_-_100861482.23-P1P2	GAGTTGTGTTGTGCCAATGG	2	1	empirical	ZNHIT1_-_100861047.23-P1P2|ZNHIT1_-_100861482.23-P1P2
LIPF	P1P2	significant	LIPF_+_90424226.23-P1P2	GAGTTTCCTCAGAAATAGTT	1	2	empirical	LIPF_-_90424381.23-P1P2	GAATGTATCTGTTTAAATTA	2	1	empirical	LIPF_+_90424226.23-P1P2|LIPF_-_90424381.23-P1P2
STK33	P1P2	nonessential	STK33_-_8615755.23-P1P2	GACCGCAGGGCAGTGGACGG	1	1	predicted	STK33_-_8615519.23-P1P2	GCCGGCAGCGAGATACCCAG	2	2	predicted	STK33_-_8615755.23-P1P2|STK33_-_8615519.23-P1P2
TRABD	P2	significant	TRABD_+_50629458.23-P2	GCCTCTGCAGAGGGCAAGGG	1	3	empirical	TRABD_+_50629024.23-P2	GAGGCTGCCGAGGCACACCG	1	1	predicted	TRABD_+_50629458.23-P2|TRABD_+_50629024.23-P2
GSTM4	P1P2	nonessential	GSTM4_+_110198783.23-P1P2	GCAGGTTGCTGGATCCTCAC	1	1	predicted	GSTM4_-_110198757.23-P1P2	GTTGCTCCCTGAACACTCGG	2	2	predicted	GSTM4_+_110198783.23-P1P2|GSTM4_-_110198757.23-P1P2
TTLL5	P1P2	nonessential	TTLL5_-_76127635.23-P1P2	GTAACCGGGGAAGCAGCCGT	1	1	predicted	TTLL5_-_76127590.23-P1P2	GCTGCGCAGTGGCTCCGAGC	2	2	predicted	TTLL5_-_76127635.23-P1P2|TTLL5_-_76127590.23-P1P2
CNGA4	P1	nonessential	CNGA4_+_6260337.23-P1	GGTGCCTGACTGCCTGAAGG	1	1	predicted	CNGA4_-_6260397.23-P1	GAGTCCCCTACAGGCAGAGA	2	2	predicted	CNGA4_+_6260337.23-P1|CNGA4_-_6260397.23-P1
UBXN2B	P1P2	nonessential	UBXN2B_-_59323947.23-P1P2	GGCCGCTAGCCAGCGGAAGA	1	1	predicted	UBXN2B_+_59323961.23-P1P2	GCTCCTGCTCGCCGGGCTCA	2	2	predicted	UBXN2B_-_59323947.23-P1P2|UBXN2B_+_59323961.23-P1P2
PAX8	P1P2	significant	PAX8_+_114036426.23-P1P2	GGGGCGGACCCAACCAGTGA	1	1	predicted	PAX8_-_114036454.23-P1P2	GTGGTTGGGTCCGCCCGCGA	2	2	predicted	PAX8_+_114036426.23-P1P2|PAX8_-_114036454.23-P1P2
CTSZ	P1P2	nonessential	CTSZ_-_57582269.23-P1P2	Gcccgctctggatcccgccc	1	1	predicted	CTSZ_-_57582111.23-P1P2	GCTGTCCCCGGCGGAAGTAG	2	2	predicted	CTSZ_-_57582269.23-P1P2|CTSZ_-_57582111.23-P1P2
DEFA4	P1P2	nonessential	DEFA4_+_6795613.23-P1P2	GCTGCTGTGAACTTCTATCT	1	1	predicted	DEFA4_-_6795689.23-P1P2	GCCACAGTGAGAGGTCAGAC	2	2	predicted	DEFA4_+_6795613.23-P1P2|DEFA4_-_6795689.23-P1P2
OR10G7	ENST00000330487.5	nonessential	OR10G7_-_123909694.23-ENST00000330487.5	GAGGATGAACGCTGTCAGTA	1	1	predicted	OR10G7_-_123909724.23-ENST00000330487.5	GGACATTTCTTCTCATATAT	2	2	predicted	OR10G7_-_123909694.23-ENST00000330487.5|OR10G7_-_123909724.23-ENST00000330487.5
GHSR	P1P2	nonessential	GHSR_-_172166175.23-P1P2	GCCAGTGTGAGGTTGAACCC	1	1	predicted	GHSR_+_172166170.23-P1P2	GGACGCCCAGCGAAGAGCCG	2	2	predicted	GHSR_-_172166175.23-P1P2|GHSR_+_172166170.23-P1P2
OR4E2	ENST00000408935.1	nonessential	OR4E2_-_22133358.23-ENST00000408935.1	GCTTGGGACTCACTGATAAC	1	1	predicted	OR4E2_-_22133299.23-ENST00000408935.1	GCCCCCCTAAGCTCATTGAA	2	2	predicted	OR4E2_-_22133358.23-ENST00000408935.1|OR4E2_-_22133299.23-ENST00000408935.1
PLD3	P1	nonessential	PLD3_-_40871795.23-P1	GAGAAGCTGGGGCCCACCGG	1	1	predicted	PLD3_-_40871837.23-P1	GCGAGGCCGAGGCCCCTCAG	2	2	predicted	PLD3_-_40871795.23-P1|PLD3_-_40871837.23-P1
BMPR1B	P1P2	nonessential	BMPR1B_-_95679116.23-P1P2	GcgcggcggcCAGAAGTTGA	1	1	predicted	BMPR1B_-_95679535.23-P1P2	GCTGCGCAGGCGAGGAGTCG	2	2	predicted	BMPR1B_-_95679116.23-P1P2|BMPR1B_-_95679535.23-P1P2
LRRC34	P1P2	nonessential	LRRC34_+_169530292.23-P1P2	GCAGTGGGTGAGAGGAGCAT	1	1	predicted	LRRC34_+_169530278.23-P1P2	GAGCATGGGGAGCTCCCGGG	2	2	predicted	LRRC34_+_169530292.23-P1P2|LRRC34_+_169530278.23-P1P2
CASQ2	P1P2	nonessential	CASQ2_+_116311312.23-P1P2	GGAGCTGGCTGGACCCAAGG	1	1	predicted	CASQ2_-_116311345.23-P1P2	GCAGCCAGCTCTGGAATCGT	2	2	predicted	CASQ2_+_116311312.23-P1P2|CASQ2_-_116311345.23-P1P2
GULP1	P1P2	nonessential	GULP1_+_189157591.23-P1P2	GCAGTCGGAGCGAGAACCCA	1	1	predicted	GULP1_-_189157751.23-P1P2	GGTGTGCGGGAGGGAACTCT	2	2	predicted	GULP1_+_189157591.23-P1P2|GULP1_-_189157751.23-P1P2
FAM222B	P2	nonessential	FAM222B_-_27139423.23-P2	GCACGGAGCGCAGGACTCCG	1	1	predicted	FAM222B_+_27139440.23-P2	GGCAAGCGGCAGCCGGCTGG	2	2	predicted	FAM222B_-_27139423.23-P2|FAM222B_+_27139440.23-P2
RNF150	P1P2	nonessential	RNF150_-_142054533.23-P1P2	GCTCGCCGGTGGCTGCGCCT	1	1	predicted	RNF150_-_142054584.23-P1P2	GGGGGACAGTGGGAGCGAGC	2	2	predicted	RNF150_-_142054533.23-P1P2|RNF150_-_142054584.23-P1P2
XPO5	P1P2	significant	XPO5_+_43543679.23-P1P2	GgccgcggcccggTACCAAC	1	3	empirical	XPO5_-_43543686.23-P1P2	GCCTCGGCGAGACCACCCGT	2	1	empirical	XPO5_+_43543679.23-P1P2|XPO5_-_43543686.23-P1P2
COPS8	P1P2	significant	COPS8_-_237994589.23-P1P2	GGGCTGTCCGGACGGTGCAG	1	2	empirical	COPS8_-_237994564.23-P1P2	GACGCCTGAGGGACAGTCTG	2	3	empirical	COPS8_-_237994589.23-P1P2|COPS8_-_237994564.23-P1P2
MISP	P1P2	significant	MISP_-_751141.23-P1P2	GCATCGAGGAGTCAGAGTGG	1	1	predicted	MISP_+_751359.23-P1P2	GGCCCCAGAGTACCTAGCGG	2	2	predicted	MISP_-_751141.23-P1P2|MISP_+_751359.23-P1P2
AADAT	P1P2	nonessential	AADAT_-_171011368.23-P1P2	GCGGCCCAGAGGCTAGCCCA	1	1	predicted	AADAT_+_171011325.23-P1P2	GGCGCCTAGGCCGGCCAACG	2	2	predicted	AADAT_-_171011368.23-P1P2|AADAT_+_171011325.23-P1P2
ATP8A2	P1P2	nonessential	ATP8A2_-_25946184.23-P1P2	GTTGGCCGCTGCGGCACGGA	1	1	predicted	ATP8A2_-_25946360.23-P1P2	GACACGGGCGAGATGCTGAA	2	2	predicted	ATP8A2_-_25946184.23-P1P2|ATP8A2_-_25946360.23-P1P2
PKIB	P2	nonessential	PKIB_-_123038738.23-P2	GGCAATCTGGCTCACACTGA	1	1	predicted	PKIB_+_123039013.23-P2	GGTCTGGTAAGGCATTCCGG	2	2	predicted	PKIB_-_123038738.23-P2|PKIB_+_123039013.23-P2
OPN1LW	P1P2	nonessential	OPN1LW_+_153409702.23-P1P2	GGCCCTGGCGCATCACCTGA	1	1	predicted	OPN1LW_-_153409722.23-P1P2	GACCCTCAGGTGATGCGCCA	2	2	predicted	OPN1LW_+_153409702.23-P1P2|OPN1LW_-_153409722.23-P1P2
OR4C15	ENST00000314644.2	nonessential	OR4C15_+_55321831.23-ENST00000314644.2	GATCATAGTCATTAACAAGT	1	1	predicted	OR4C15_+_55322135.23-ENST00000314644.2	GGCACGCATCCAGGAAGGAC	2	2	predicted	OR4C15_+_55321831.23-ENST00000314644.2|OR4C15_+_55322135.23-ENST00000314644.2
ASMT	P1P2	nonessential	ASMT_-_1734188.23-P1P2	GTACGCTCTGTGGGACAAGG	1	1	predicted	ASMT_+_1734013.23-P1P2	GACAGAGCCTGCTGGCAAGG	2	2	predicted	ASMT_-_1734188.23-P1P2|ASMT_+_1734013.23-P1P2
SAMD9	P1P2	nonessential	SAMD9_+_92747264.23-P1P2	GTACTTTTCTCTAGCATCGT	1	1	predicted	SAMD9_+_92747261.23-P1P2	GTTTTCTCTAGCATCGTAGG	2	2	predicted	SAMD9_+_92747264.23-P1P2|SAMD9_+_92747261.23-P1P2
MSMB	P1	nonessential	MSMB_+_51549969.23-P1	Ggcttgcggtgagaccccag	1	1	predicted	MSMB_-_51549591.23-P1	GTCCTGCTTATCACAATGGT	2	2	predicted	MSMB_+_51549969.23-P1|MSMB_-_51549591.23-P1
SCNN1B	P1P2	nonessential	SCNN1B_+_23313707.23-P1P2	GGGATGCGCGCTGTCGGCGG	1	1	predicted	SCNN1B_+_23313895.23-P1P2	GGGTCCCAGGCGCCTCAGAC	2	2	predicted	SCNN1B_+_23313707.23-P1P2|SCNN1B_+_23313895.23-P1P2
NDUFA13	P1P2	significant	NDUFA13_-_19627479.23-P1P2	Gagaaggccgcggctcccca	1	7	empirical	NDUFA13_+_19627083.23-P1P2	GCGATGGGCCCATAGCCCCC	2	3	empirical	NDUFA13_-_19627479.23-P1P2|NDUFA13_+_19627083.23-P1P2
SYT8	P1P2	nonessential	SYT8_-_1856252.23-P1P2	GGGCTGCTGCTAGTCAGATG	1	1	predicted	SYT8_+_1856191.23-P1P2	GGCAAGGAGGCAGCACGGGG	2	2	predicted	SYT8_-_1856252.23-P1P2|SYT8_+_1856191.23-P1P2
WNT10B	P1P2	nonessential	WNT10B_-_49365421.23-P1P2	GCCGCGGCCGCCgggaggaa	1	1	predicted	WNT10B_-_49365513.23-P1P2	GGCTCTCACCGAGCTCAGGG	2	2	predicted	WNT10B_-_49365421.23-P1P2|WNT10B_-_49365513.23-P1P2
ASB5	P1P2	nonessential	ASB5_+_177190311.23-P1P2	GAGCATCCCGGACGAGAGCC	1	1	predicted	ASB5_-_177190327.23-P1P2	GATGTGCCTGGCTCTCGTCC	2	2	predicted	ASB5_+_177190311.23-P1P2|ASB5_-_177190327.23-P1P2
ETAA1	P1P2	significant	ETAA1_-_67624659.23-P1P2	GCAGTGGCGGCGGAGGAATG	1	6	empirical	ETAA1_+_67624484.23-P1P2	GAAACCGCACCCCGCACCAA	2	1	empirical	ETAA1_-_67624659.23-P1P2|ETAA1_+_67624484.23-P1P2
ARTN	P2	nonessential	ARTN_+_44401656.23-P2	GCTCGGGCTGAGATCAGGCC	1	1	predicted	ARTN_+_44401650.23-P2	GCTGAGATCAGGCCGGGCAT	2	2	predicted	ARTN_+_44401656.23-P2|ARTN_+_44401650.23-P2
CHN2	P2	nonessential	CHN2_-_29186250.23-P2	GTCGTCGTGTCCCAACCTCC	1	1	predicted	CHN2_-_29186314.23-P2	GGAAGAAGCAAGCAGCCCCA	2	2	predicted	CHN2_-_29186250.23-P2|CHN2_-_29186314.23-P2
CLEC5A	P1P2	nonessential	CLEC5A_-_141646542.23-P1P2	GGGTAGGTGACAGACAGGAC	1	1	predicted	CLEC5A_+_141646731.23-P1P2	GAAGGCAGAGACTGTGAAGA	2	2	predicted	CLEC5A_-_141646542.23-P1P2|CLEC5A_+_141646731.23-P1P2
ETFDH	P1P2	nonessential	ETFDH_+_159593530.23-P1P2	GCGGCGGGCGCTGGACCTCT	1	1	predicted	ETFDH_-_159593461.23-P1P2	GGAACGCCGTGAAGCAAGAG	2	2	predicted	ETFDH_+_159593530.23-P1P2|ETFDH_-_159593461.23-P1P2
MSL2	P1P2	nonessential	MSL2_+_135915118.23-P1P2	GGGAGTCTCGGGGATGACAG	1	1	predicted	MSL2_+_135915144.23-P1P2	GCGAGCGCTAGCGACGACGG	2	2	predicted	MSL2_+_135915118.23-P1P2|MSL2_+_135915144.23-P1P2
TMEM71	P1P2	nonessential	TMEM71_-_133772658.23-P1P2	GTGAGGACTGAGCAGTTCCT	1	1	predicted	TMEM71_+_133772737.23-P1P2	GTGTGCACAGCAATGTGCGT	2	2	predicted	TMEM71_-_133772658.23-P1P2|TMEM71_+_133772737.23-P1P2
GNPNAT1	P1P2	significant	GNPNAT1_-_53258340.23-P1P2	GGCCTCTGCCCCCTCACGCA	1	5	empirical	GNPNAT1_-_53258358.23-P1P2	GAGGGCCGCGCGCAGGCGAG	2	1	empirical	GNPNAT1_-_53258340.23-P1P2|GNPNAT1_-_53258358.23-P1P2
ELOVL7	P1P2	nonessential	ELOVL7_+_60140075.23-P1P2	GCAGTCGGCGGCCGGGACAG	1	1	predicted	ELOVL7_+_60139915.23-P1P2	GCGCGGAGGAGAAGAGACTG	2	2	predicted	ELOVL7_+_60140075.23-P1P2|ELOVL7_+_60139915.23-P1P2
GPR124	P1P2	nonessential	GPR124_-_37654417.23-P1P2	GCTCCATCCATGGCACGGAG	1	1	predicted	GPR124_+_37654450.23-P1P2	GGCGCTGGGCTGGGACCTAG	2	2	predicted	GPR124_-_37654417.23-P1P2|GPR124_+_37654450.23-P1P2
ITGAL	P1P2	nonessential	ITGAL_+_30484102.23-P1P2	GGCAGCGTCAGGAGGCCCGT	1	1	predicted	ITGAL_+_30484132.23-P1P2	GCCAGCACTCGAGGGACCTG	2	2	predicted	ITGAL_+_30484102.23-P1P2|ITGAL_+_30484132.23-P1P2
EFNA4	P1P2	nonessential	EFNA4_+_155036369.23-P1P2	GTAGACTACGTGGCGGAGGC	1	1	predicted	EFNA4_+_155036199.23-P1P2	GAGAGGGAAGTTGCGGAAAG	2	2	predicted	EFNA4_+_155036369.23-P1P2|EFNA4_+_155036199.23-P1P2
HIC2	P1	significant	HIC2_-_21771720.23-P1	Ggcgctcggggcgcgctagg	1	6	empirical	HIC2_-_21771708.23-P1	Gcggctgtgagcggcgctcg	2	4	empirical	HIC2_-_21771720.23-P1|HIC2_-_21771708.23-P1
C16orf97	ENST00000562818.1	nonessential	C16orf97_-_52107762.23-ENST00000562818.1	Gtgccacttaaccagtttgg	1	1	predicted	C16orf97_-_52107759.23-ENST00000562818.1	GACTtgccacttaaccagtt	2	2	predicted	C16orf97_-_52107762.23-ENST00000562818.1|C16orf97_-_52107759.23-ENST00000562818.1
TRMT44	P1P2	significant	TRMT44_+_8442671.23-P1P2	GGCTCCAGCGGGCCTCCAGG	1	1	empirical	TRMT44_+_8442568.23-P1P2	GGCGCCTGGGTAGCTGATCC	2	4	empirical	TRMT44_+_8442671.23-P1P2|TRMT44_+_8442568.23-P1P2
SIAE	P1P2	nonessential	SIAE_-_124543567.23-P1P2	GTGTCGGCCCACAGGATTAA	1	1	predicted	SIAE_-_124543594.23-P1P2	GCCAGCCCGAGTACAAGCCC	2	2	predicted	SIAE_-_124543567.23-P1P2|SIAE_-_124543594.23-P1P2
ZNF239	P1P2	nonessential	ZNF239_+_44069940.23-P1P2	GCGCTGGCAGAGGCGTTCAG	1	1	predicted	ZNF239_+_44069989.23-P1P2	GCAGGCGTGGGGTTCCACGT	2	2	predicted	ZNF239_+_44069940.23-P1P2|ZNF239_+_44069989.23-P1P2
GFER	P1P2	essential	GFER_-_2034253.23-P1P2	GGCGAGCGGGGCCGCTTCCA	1	1	essential	GFER_-_2034199.23-P1P2	GTCTGGAGGCCGAGCTGACC	2	5	essential	GFER_-_2034253.23-P1P2|GFER_-_2034199.23-P1P2
TOB2	P1P2	nonessential	TOB2_+_41842825.23-P1P2	GCCGTGCGCAGGGTTGCTAA	1	1	predicted	TOB2_-_41842753.23-P1P2	GCCCCGCGTCGCCCGAGCCA	2	2	predicted	TOB2_+_41842825.23-P1P2|TOB2_-_41842753.23-P1P2
EXOC8	P1P2	significant	EXOC8_-_231473564.23-P1P2	GGGCTGTCTAGACCCACCCA	1	2	empirical	EXOC8_-_231473581.23-P1P2	GCAAGGCCAACCGAGCTCCT	2	1	empirical	EXOC8_-_231473564.23-P1P2|EXOC8_-_231473581.23-P1P2
NOP10	P1P2	essential	NOP10_+_34635309.23-P1P2	GCGGACCACTGCAGACTGAG	1	3	essential	NOP10_+_34635306.23-P1P2	GACCACTGCAGACTGAGCGG	2	1	essential	NOP10_+_34635309.23-P1P2|NOP10_+_34635306.23-P1P2
ABCC1	P1P2	significant	ABCC1_+_16043647.23-P1P2	GCCCCGGCACGTACCCAGAG	1	3	empirical	ABCC1_+_16043482.23-P1P2	GCTGGCGCTAGCGCTggcgg	2	1	empirical	ABCC1_+_16043647.23-P1P2|ABCC1_+_16043482.23-P1P2
WDR20	P1P2	nonessential	WDR20_-_102606236.23-P1P2	GGGCGTGATCCGGGCACTTA	1	1	predicted	WDR20_+_102606341.23-P1P2	GGCCGGCTGTACTCCGAGTG	2	2	predicted	WDR20_-_102606236.23-P1P2|WDR20_+_102606341.23-P1P2
C19orf66	P1P2	nonessential	C19orf66_-_10197533.23-P1P2	GCAAGTTCGGGCCGGGAGAA	1	1	predicted	C19orf66_+_10197572.23-P1P2	GGACAGGGGGGTTCCGGTGG	2	2	predicted	C19orf66_-_10197533.23-P1P2|C19orf66_+_10197572.23-P1P2
SCXA	ENST00000340695.2	nonessential	SCXA_+_145490600.23-ENST00000340695.2	GcgcAGCGTGGCGAAGGACA	1	1	predicted	SCXA_+_145490588.23-ENST00000340695.2	GAAGGACATggggccggcgg	2	2	predicted	SCXA_+_145490600.23-ENST00000340695.2|SCXA_+_145490588.23-ENST00000340695.2
B3GALT4	P1P2	significant	B3GALT4_+_33244954.23-P1P2	GGCCAGCAAGCTCCGCTCCA	1	6	empirical	B3GALT4_+_33245090.23-P1P2	GGACCACGCCCGGGATGCGG	2	2	empirical	B3GALT4_+_33244954.23-P1P2|B3GALT4_+_33245090.23-P1P2
FAM188A	P1P2	nonessential	FAM188A_-_15902478.23-P1P2	GAGCCTGTCAAGCCAGGTTG	1	1	predicted	FAM188A_+_15902459.23-P1P2	GTGCCCCAACCTGGCTTGAC	2	2	predicted	FAM188A_-_15902478.23-P1P2|FAM188A_+_15902459.23-P1P2
ATAD1	P1P2	significant	ATAD1_-_89577820.23-P1P2	GAGGGCGTGGGAGAAGACCG	1	5	empirical	ATAD1_-_89577928.23-P1P2	GGGAACCAGCTACTCACCCA	2	2	empirical	ATAD1_-_89577820.23-P1P2|ATAD1_-_89577928.23-P1P2
C15orf59	P1P2	nonessential	C15orf59_+_74044035.23-P1P2	GAGGCTCGCTCTCTCCGCAG	1	1	predicted	C15orf59_-_74043903.23-P1P2	GGGATCCCCTCACAACTCCT	2	2	predicted	C15orf59_+_74044035.23-P1P2|C15orf59_-_74043903.23-P1P2
HLA-DMA	P2	nonessential	HLA-DMA_+_32936260.23-P2	GCGGACCGGAACCGCATCTC	1	1	predicted	HLA-DMA_-_32936271.23-P2	GAGCCCCGCCGCCGGAGATG	2	2	predicted	HLA-DMA_+_32936260.23-P2|HLA-DMA_-_32936271.23-P2
ZDHHC1	P1P2	nonessential	ZDHHC1_-_67450375.23-P1P2	GAGACTGGCTGGGCCTCGTC	1	1	predicted	ZDHHC1_-_67450185.23-P1P2	GGCCGCGCCTCAGACCCTCG	2	2	predicted	ZDHHC1_-_67450375.23-P1P2|ZDHHC1_-_67450185.23-P1P2
RCCD1	P1	significant	RCCD1_+_91498159.23-P1	GCACCTCAGTCCCGGGACCG	1	1	predicted	RCCD1_+_91498195.23-P1	GGAGGAGTGACGCCCAAGAC	2	2	predicted	RCCD1_+_91498159.23-P1|RCCD1_+_91498195.23-P1
ALG13	P1P2	significant	ALG13_+_110924898.23-P1P2	GCGACGTGCGGTCCACAGGG	1	10	empirical	ALG13_+_110924465.23-P1P2	GTCAAAGCTGGTGGTCCCTA	2	3	empirical	ALG13_+_110924898.23-P1P2|ALG13_+_110924465.23-P1P2
ARHGAP6	P1P2	significant	ARHGAP6_+_11445719.23-P1P2	GGGCGCGCCACTCCTCCCGG	1	7	empirical	ARHGAP6_+_11445607.23-P1P2	GCACTGGGCCGCTCCGGGTG	2	1	empirical	ARHGAP6_+_11445719.23-P1P2|ARHGAP6_+_11445607.23-P1P2
HEPHL1	P1P2	nonessential	HEPHL1_-_93754601.23-P1P2	GTGGGTCTGTCTGGGCTGGT	1	1	predicted	HEPHL1_-_93754542.23-P1P2	GGTTACATCCACAAATGCCT	2	2	predicted	HEPHL1_-_93754601.23-P1P2|HEPHL1_-_93754542.23-P1P2
GRIP1	ENST00000398016.3	nonessential	GRIP1_-_67072800.23-ENST00000398016.3	GGGAGAAAGGTAGTCCCAGT	1	1	predicted	GRIP1_+_67072819.23-ENST00000398016.3	GGACCTCTGCATCAGCCAAG	2	2	predicted	GRIP1_-_67072800.23-ENST00000398016.3|GRIP1_+_67072819.23-ENST00000398016.3
KRT76	P1P2	nonessential	KRT76_-_53171092.23-P1P2	GTCATAGTGAGAGAGCTTGG	1	1	predicted	KRT76_-_53171132.23-P1P2	GGCAAGAGCTGAGAGGGATA	2	2	predicted	KRT76_-_53171092.23-P1P2|KRT76_-_53171132.23-P1P2
DRC1	P1P2	nonessential	DRC1_+_26624855.23-P1P2	GAGGGACCCCGGCGGATTCA	1	1	predicted	DRC1_+_26624873.23-P1P2	GTTCGGGTCCAGGGCCTCTA	2	2	predicted	DRC1_+_26624855.23-P1P2|DRC1_+_26624873.23-P1P2
GNL3L	P1P2	essential	GNL3L_+_54556706.23-P1P2	GGCGGGGATCTGAGAAGCGA	1	1	essential	GNL3L_+_54556690.23-P1P2	GCGAGGGCAACACGACAACT	2	2	essential	GNL3L_+_54556706.23-P1P2|GNL3L_+_54556690.23-P1P2
PFN2	P1P2	nonessential	PFN2_+_149688650.23-P1P2	GGTCCGCGCTGCAGTGCGAA	1	1	predicted	PFN2_+_149688635.23-P1P2	GCGAAGGGCTCGAAGATGGC	2	2	predicted	PFN2_+_149688650.23-P1P2|PFN2_+_149688635.23-P1P2
PTK2	P1P2	significant	PTK2_-_142011343.23-P1P2	GCACAGTGGTCCGGGACcgg	1	1	empirical	PTK2_-_142011334.23-P1P2	GCCGCGGGCTCACAGTGGTC	2	4	empirical	PTK2_-_142011343.23-P1P2|PTK2_-_142011334.23-P1P2
WNT5B	ENST00000537031.1	significant	WNT5B_+_1683851.23-ENST00000537031.1	GAGGACTGCGAAGCTTCCTG	1	1	predicted	WNT5B_-_1683904.23-ENST00000537031.1	GTGCTTGAACAGCTGGATGT	2	2	predicted	WNT5B_+_1683851.23-ENST00000537031.1|WNT5B_-_1683904.23-ENST00000537031.1
CNTD2	P2	nonessential	CNTD2_+_40730804.23-P2	Gcctaagatgtccaactgac	1	1	predicted	CNTD2_+_40730623.23-P2	GGGCTGGTCCAGGTGCACGT	2	2	predicted	CNTD2_+_40730804.23-P2|CNTD2_+_40730623.23-P2
SLC5A2	P1	nonessential	SLC5A2_-_31494499.23-P1	GGGCTCGGCACCAGAGATGG	1	1	predicted	SLC5A2_-_31494496.23-P1	GGCAGGCTCGGCACCAGAGA	2	2	predicted	SLC5A2_-_31494499.23-P1|SLC5A2_-_31494496.23-P1
TRIML2	P1P2	nonessential	TRIML2_-_189030734.23-P1P2	GgagtcaccacaccGAACCA	1	1	predicted	TRIML2_+_189030719.23-P1P2	GGAAATACCTTGGTTCggtg	2	2	predicted	TRIML2_-_189030734.23-P1P2|TRIML2_+_189030719.23-P1P2
DOLK	P1P2	nonessential	DOLK_+_131709816.23-P1P2	GGCGGCTGTAACTGTGAGGA	1	1	predicted	DOLK_-_131709668.23-P1P2	GAGCCCCGTCAAGCAGAGGG	2	2	predicted	DOLK_+_131709816.23-P1P2|DOLK_-_131709668.23-P1P2
TTR	P1	nonessential	TTR_+_29171894.23-P1	GCACAAATACCAGTCCAGCA	1	1	predicted	TTR_+_29172095.23-P1	GCCCAGCTCAGTAAGCTCAG	2	2	predicted	TTR_+_29171894.23-P1|TTR_+_29172095.23-P1
MNX1	P1P2	nonessential	MNX1_+_156803347.23-P1P2	GGCGCGGGTCCCCACCACGG	1	1	predicted	MNX1_+_156803299.23-P1P2	GGGCTGCAGCGCAAAGAACC	2	2	predicted	MNX1_+_156803347.23-P1P2|MNX1_+_156803299.23-P1P2
ZNF354B	P1P2	nonessential	ZNF354B_+_178286968.23-P1P2	GCAGAGCGCCTGGGACCTAG	1	1	predicted	ZNF354B_-_178287044.23-P1P2	GCTTGAGGTCGCCCAGACGT	2	2	predicted	ZNF354B_+_178286968.23-P1P2|ZNF354B_-_178287044.23-P1P2
EFNA1	P1P2	nonessential	EFNA1_-_155100413.23-P1P2	GAGTGGGAACCCAGACCCAT	1	1	predicted	EFNA1_-_155100397.23-P1P2	GCGCCGCGGAGAAAGCCAGT	2	2	predicted	EFNA1_-_155100413.23-P1P2|EFNA1_-_155100397.23-P1P2
TMEM254	P1P2	nonessential	TMEM254_-_81838464.23-P1P2	GGGTGTTGCAGCCATGGCTA	1	1	predicted	TMEM254_+_81838477.23-P1P2	GAGACTGCCTCGCTGAAAGT	2	2	predicted	TMEM254_-_81838464.23-P1P2|TMEM254_+_81838477.23-P1P2
TMSB10	P1P2	significant	TMSB10_-_85132984.23-P1P2	GGCCCTGGGACCGAGAAGAG	1	2	empirical	TMSB10_+_85133250.23-P1P2	GGCTGGGGCGCGGGAGACCG	2	2	empirical	TMSB10_-_85132984.23-P1P2|TMSB10_+_85133250.23-P1P2
WNT7A	P1P2	significant	WNT7A_-_13921172.23-P1P2	GGCCGGCAGAGGCTCGCAGG	1	8	empirical	WNT7A_-_13921497.23-P1P2	GGAGCACGGGAGCCACGGAG	2	1	empirical	WNT7A_-_13921172.23-P1P2|WNT7A_-_13921497.23-P1P2
TNFSF13B	P1P2	nonessential	TNFSF13B_+_108922422.23-P1P2	GGTAGAAAGACACCACCGTG	1	1	predicted	TNFSF13B_-_108922432.23-P1P2	GCTGTCTTGCTGCCTCACGG	2	2	predicted	TNFSF13B_+_108922422.23-P1P2|TNFSF13B_-_108922432.23-P1P2
ZNF488	P2	nonessential	ZNF488_-_48359391.23-P2	GCCCACAGCGGTCTGGACAG	1	1	predicted	ZNF488_-_48359394.23-P2	GACAGCGGTCTGGACAGAGG	2	2	predicted	ZNF488_-_48359391.23-P2|ZNF488_-_48359394.23-P2
SURF2	P1P2	nonessential	SURF2_+_136223466.23-P1P2	GTCGCCCGGCAACTCGCTCA	1	1	predicted	SURF2_-_136223495.23-P1P2	GGAGTTGCCGGGCGACGTGC	2	2	predicted	SURF2_+_136223466.23-P1P2|SURF2_-_136223495.23-P1P2
RNASEH2A	P1P2	nonessential	RNASEH2A_-_12917521.23-P1P2	GAGCTGGAGAGAGACAATAC	1	1	predicted	RNASEH2A_+_12917522.23-P1P2	GAGGCGAACTCAGGCGACAG	2	2	predicted	RNASEH2A_-_12917521.23-P1P2|RNASEH2A_+_12917522.23-P1P2
MEF2B	P1P2	nonessential	MEF2B_-_19302936.23-P1P2	GGGCTCCTCCATAGCGACCG	1	1	predicted	MEF2B_+_19302922.23-P1P2	GCGCTCGGCCGCGGTCGCTA	2	2	predicted	MEF2B_-_19302936.23-P1P2|MEF2B_+_19302922.23-P1P2
RBMS2	P1P2	nonessential	RBMS2_+_56915622.23-P1P2	GAGAGATGAAGGGGGGCTGC	1	1	predicted	RBMS2_+_56915606.23-P1P2	GTGCGGGCAGAGAATGAGCT	2	2	predicted	RBMS2_+_56915622.23-P1P2|RBMS2_+_56915606.23-P1P2
CSHL1	P1	nonessential	CSHL1_-_61988605.23-P1	GCTGAGTGGTGCGGGGAGTC	1	1	predicted	CSHL1_+_61988478.23-P1	GGAGGCGGCGCCCTGCAGAT	2	2	predicted	CSHL1_-_61988605.23-P1|CSHL1_+_61988478.23-P1
SLC4A7	P1P2	significant	SLC4A7_+_27525847.23-P1P2	GAGCTTCAGGTTCCACGCCG	1	6	empirical	SLC4A7_+_27525631.23-P1P2	GGTACCGTAGCGGCCGTCAC	2	10	empirical	SLC4A7_+_27525847.23-P1P2|SLC4A7_+_27525631.23-P1P2
MINOS1-NBL1	P1P2	essential	MINOS1-NBL1_+_19923571.23-P1P2	GGACCGCATCCGCCAGACAC	1	4	essential	MINOS1-NBL1_-_19923558.23-P1P2	GACATGTCTGAGTCGGAGCT	2	2	essential	MINOS1-NBL1_+_19923571.23-P1P2|MINOS1-NBL1_-_19923558.23-P1P2
CYP4F11	P1P2	nonessential	CYP4F11_+_16045652.23-P1P2	GGGCAAAGACCTCCTAGCAG	1	1	predicted	CYP4F11_-_16045665.23-P1P2	GCCTCTCCCCCTCTGCTAGG	2	2	predicted	CYP4F11_+_16045652.23-P1P2|CYP4F11_-_16045665.23-P1P2
OGFR	P1P2	significant	OGFR_+_61436202.23-P1P2	GCGGGGTCGTCCATGCTCgg	1	2	empirical	OGFR_+_61436199.23-P1P2	GGGTCGTCCATGCTCggcgg	2	3	empirical	OGFR_+_61436202.23-P1P2|OGFR_+_61436199.23-P1P2
PDZD8	P1P2	significant	PDZD8_-_119134955.23-P1P2	GTCCCGAAGGGCCGGTGTGG	1	6	empirical	PDZD8_-_119134876.23-P1P2	GCTCCGTGGGCCTCGTCCAG	2	3	empirical	PDZD8_-_119134955.23-P1P2|PDZD8_-_119134876.23-P1P2
DHRS7C	P1P2	nonessential	DHRS7C_-_9694670.23-P1P2	GACGCTGATCAGGACTCCCA	1	1	predicted	DHRS7C_-_9694810.23-P1P2	GGAAAGCAGACCGAATCCAG	2	2	predicted	DHRS7C_-_9694670.23-P1P2|DHRS7C_-_9694810.23-P1P2
FOXD2	P1P2	nonessential	FOXD2_-_47904030.23-P1P2	GCCGAGGACGAGGAGGAGTC	1	1	predicted	FOXD2_-_47904023.23-P1P2	GGACTTAGCCGAGGACGAGG	2	2	predicted	FOXD2_-_47904030.23-P1P2|FOXD2_-_47904023.23-P1P2
GJB7	ENST00000296882.3	nonessential	GJB7_+_88032509.23-ENST00000296882.3	GTGCGGGTACAGGGAGTCCA	1	1	predicted	GJB7_+_88032504.23-ENST00000296882.3	GGTACAGGGAGTCCACGGAG	2	2	predicted	GJB7_+_88032509.23-ENST00000296882.3|GJB7_+_88032504.23-ENST00000296882.3
C19orf12	P1P2	nonessential	C19orf12_+_30206127.23-P1P2	GAGGCCTGCGCGACCCTCCG	1	1	predicted	C19orf12_-_30206076.23-P1P2	GCGCGCTCGGCGATCAGACG	2	2	predicted	C19orf12_+_30206127.23-P1P2|C19orf12_-_30206076.23-P1P2
SPATA2	P1P2	nonessential	SPATA2_+_48531987.23-P1P2	GGAGAGGCTAGAGCCCGACG	1	1	predicted	SPATA2_-_48531996.23-P1P2	GGCCGGAGCCGGGCCCCGTC	2	2	predicted	SPATA2_+_48531987.23-P1P2|SPATA2_-_48531996.23-P1P2
DHRS2	P1P2	nonessential	DHRS2_+_24105839.23-P1P2	Gaaatgtgtacggaattgat	1	1	predicted	DHRS2_-_24106054.23-P1P2	Gaattcggtggctaaattct	2	2	predicted	DHRS2_+_24105839.23-P1P2|DHRS2_-_24106054.23-P1P2
HIST1H2BC	P1P2	nonessential	HIST1H2BC_-_26124168.23-P1P2	GATGTGTCGAAAGTAAAGAG	1	1	predicted	HIST1H2BC_-_26124187.23-P1P2	GCGGATTTCTGCTACTTATA	2	2	predicted	HIST1H2BC_-_26124168.23-P1P2|HIST1H2BC_-_26124187.23-P1P2
PCK2	P1P2	significant	PCK2_+_24563556.23-P1P2	GGAGCGGAGCCGGGGAGGTA	1	1	predicted	PCK2_+_24563732.23-P1P2	GCCTAGGATGGGAAACCTGG	2	2	predicted	PCK2_+_24563556.23-P1P2|PCK2_+_24563732.23-P1P2
ARHGAP32	ENST00000310343.9	nonessential	ARHGAP32_+_129062200.23-ENST00000310343.9	GGCACCAGTACCTGTCACTA	1	1	predicted	ARHGAP32_-_129062212.23-ENST00000310343.9	GTGTCTGGTGCCCTAGTGAC	2	2	predicted	ARHGAP32_+_129062200.23-ENST00000310343.9|ARHGAP32_-_129062212.23-ENST00000310343.9
MECOM	P1P2	nonessential	MECOM_+_169381482.23-P1P2	GCGGCGCTGAGATGTTGGAG	1	1	predicted	MECOM_+_169381146.23-P1P2	GGGCACAGCATGAGATCCAA	2	2	predicted	MECOM_+_169381482.23-P1P2|MECOM_+_169381146.23-P1P2
CDK5R1	P1P2	nonessential	CDK5R1_-_30813611.23-P1P2	GTCGGCAGAGTTGGGTTGCG	1	1	predicted	CDK5R1_-_30813629.23-P1P2	GGCGGGCGCCGAGGACTCTC	2	2	predicted	CDK5R1_-_30813611.23-P1P2|CDK5R1_-_30813629.23-P1P2
AGTPBP1	P1P2	nonessential	AGTPBP1_-_88356703.23-P1P2	GCGCTCACCGGCTCAGGATG	1	1	predicted	AGTPBP1_-_88356586.23-P1P2	GTAAGGGGCGCAGGGATCCG	2	2	predicted	AGTPBP1_-_88356703.23-P1P2|AGTPBP1_-_88356586.23-P1P2
GABBR1	P2	significant	GABBR1_+_29600967.23-P2	GGTGGGAGGCGccctctccc	1	1	empirical	GABBR1_+_29600388.23-P2	GGAGAGGTGGAGTCCCGGGA	2	9	empirical	GABBR1_+_29600967.23-P2|GABBR1_+_29600388.23-P2
BCKDHA	P2	significant	BCKDHA_-_41882903.23-P2	GAGGCTTGGGGACCTTCCAG	1	2	empirical	BCKDHA_-_41882466.23-P2	GGGCCTGGGCTCACGAGGAA	1	1	predicted	BCKDHA_-_41882903.23-P2|BCKDHA_-_41882466.23-P2
GTF3A	P1P2	significant	GTF3A_-_27998904.23-P1P2	GCCGGCCGTGGTCGCCGAGT	1	1	empirical	GTF3A_-_27998788.23-P1P2	GGTCGCGCGAAGGTTCAGCA	2	2	empirical	GTF3A_-_27998904.23-P1P2|GTF3A_-_27998788.23-P1P2
CARTPT	P1P2	nonessential	CARTPT_-_71015511.23-P1P2	GTGAGCAACAGGGACCCCAG	1	1	predicted	CARTPT_+_71015148.23-P1P2	GAGCAGGGCGGCGCCCAGGA	2	2	predicted	CARTPT_-_71015511.23-P1P2|CARTPT_+_71015148.23-P1P2
INPP5F	ENST00000361976.2	nonessential	INPP5F_+_121485648.23-ENST00000361976.2	GGAACCGCGCCGAGAAGCAG	1	1	predicted	INPP5F_+_121485591.23-ENST00000361976.2	GGGAGAACGCGCCCcggcag	2	2	predicted	INPP5F_+_121485648.23-ENST00000361976.2|INPP5F_+_121485591.23-ENST00000361976.2
DROSHA	P1P2	significant	DROSHA_-_31532204.23-P1P2	GCTCCGGAACAGGAAACCGA	1	3	empirical	DROSHA_-_31532156.23-P1P2	GAAAGCCAGGCTACTACCGC	2	1	empirical	DROSHA_-_31532204.23-P1P2|DROSHA_-_31532156.23-P1P2
BGN	P1P2	nonessential	BGN_+_152760628.23-P1P2	GCCAGGGCTTGGGACAGCGG	1	1	predicted	BGN_-_152760510.23-P1P2	GCACCGGACAGATAGACGTG	2	2	predicted	BGN_+_152760628.23-P1P2|BGN_-_152760510.23-P1P2
IL27	P1P2	nonessential	IL27_+_28518157.23-P1P2	GACCCCCCCTACCCAGGAGA	1	1	predicted	IL27_+_28518106.23-P1P2	GGCCAGACGGCAGGCGACCT	2	2	predicted	IL27_+_28518157.23-P1P2|IL27_+_28518106.23-P1P2
FOXJ3	P1P2	nonessential	FOXJ3_-_42800858.23-P1P2	GCGAGCAGCCCCGAGAGCGG	1	1	predicted	FOXJ3_-_42800811.23-P1P2	GCCCCCGGGAAAGGTCCCAA	2	2	predicted	FOXJ3_-_42800858.23-P1P2|FOXJ3_-_42800811.23-P1P2
PQBP1	P1P2	significant	PQBP1_-_48755240.23-P1P2	GTTTCAGGCTCGGGGAGTGA	1	3	empirical	PQBP1_+_48755445.23-P1P2	GGTCCCCATGACTGCCGGGT	2	7	empirical	PQBP1_-_48755240.23-P1P2|PQBP1_+_48755445.23-P1P2
CCM2L	P1	nonessential	CCM2L_+_30606728.23-P1	GCAGACCTAGGAGAGTCCGG	1	1	predicted	CCM2L_-_30606688.23-P1	GTGGCCAGCCGGCCTCGGCG	2	2	predicted	CCM2L_+_30606728.23-P1|CCM2L_-_30606688.23-P1
NUP210L	P1P2	nonessential	NUP210L_+_154127528.23-P1P2	GTGAGCGGGAACCCGAGACC	1	1	predicted	NUP210L_-_154127521.23-P1P2	GGACGCCGGACAGCCAGTCA	2	2	predicted	NUP210L_+_154127528.23-P1P2|NUP210L_-_154127521.23-P1P2
TSEN2	P1P2	essential	TSEN2_-_12526016.23-P1P2	GGAGCGCGTGGGGCCAAGAA	1	1	essential	TSEN2_-_12525993.23-P1P2	GGCCGGCGTTGCCGGGGTAA	2	2	essential	TSEN2_-_12526016.23-P1P2|TSEN2_-_12525993.23-P1P2
WNT11	P2	nonessential	WNT11_+_75917522.23-P2	GAGGCGGCGTGCAGGACCAG	1	1	predicted	WNT11_-_75917486.23-P2	GcgcgcccggggTCACACCC	2	2	predicted	WNT11_+_75917522.23-P2|WNT11_-_75917486.23-P2
TMED4	P1P2	significant	TMED4_+_44621763.23-P1P2	GGCCTCTGCGGGCGATGGGG	1	1	empirical	TMED4_+_44621815.23-P1P2	GAATGTGCGCAGGCGCTTAG	2	2	predicted	TMED4_+_44621763.23-P1P2|TMED4_+_44621815.23-P1P2
CCDC87	P1P2	nonessential	CCDC87_-_66360476.23-P1P2	GGCTCAGGCTCGGGCTTCGG	1	1	predicted	CCDC87_+_66360479.23-P1P2	GGCGGCCGCCGGCTCTATGA	2	2	predicted	CCDC87_-_66360476.23-P1P2|CCDC87_+_66360479.23-P1P2
GATA4	P1P2	significant	GATA4_+_11561738.23-P1P2	GGCGGCGACGAAGCCTCTCG	1	1	predicted	GATA4_+_11561776.23-P1P2	GGTTCCGCGCACGCTCCCCT	2	2	predicted	GATA4_+_11561738.23-P1P2|GATA4_+_11561776.23-P1P2
KRTAP4-6	P1P2	nonessential	KRTAP4-6_-_39296766.23-P1P2	GAGAGGGTAAAGGTTCTGGG	1	1	predicted	KRTAP4-6_-_39296762.23-P1P2	GTGTCAGAGGGTAAAGGTTC	2	2	predicted	KRTAP4-6_-_39296766.23-P1P2|KRTAP4-6_-_39296762.23-P1P2
POC1A	P1P2	nonessential	POC1A_-_52188394.23-P1P2	GGCAGGGCGCAGCCATGGCG	1	1	predicted	POC1A_+_52188423.23-P1P2	GGAAACTGAACGGGCCGCAA	2	2	predicted	POC1A_-_52188394.23-P1P2|POC1A_+_52188423.23-P1P2
LEPROTL1	P1P2	nonessential	LEPROTL1_+_29953187.23-P1P2	GCCACCTCCGGGCCAAGCGC	1	1	predicted	LEPROTL1_+_29952990.23-P1P2	GCTGGCTCCACGACCCGAGG	2	2	predicted	LEPROTL1_+_29953187.23-P1P2|LEPROTL1_+_29952990.23-P1P2
LAD1	P1P2	nonessential	LAD1_-_201368024.23-P1P2	GCTCCGCCAGAGACACACGG	1	1	predicted	LAD1_+_201368381.23-P1P2	GTGTCCAGGTGAGCGCCGGA	2	2	predicted	LAD1_-_201368024.23-P1P2|LAD1_+_201368381.23-P1P2
SIGLEC6	P1P2	nonessential	SIGLEC6_-_52034882.23-P1P2	GGGTAGCATCTCTGAGGCGG	1	1	predicted	SIGLEC6_+_52034894.23-P1P2	GCCCCTTCTCTGCTCATGCA	2	2	predicted	SIGLEC6_-_52034882.23-P1P2|SIGLEC6_+_52034894.23-P1P2
SPDYA	P1	nonessential	SPDYA_+_29033771.23-P1	GGCGGGAGAGGGCCGGGCAA	1	1	predicted	SPDYA_+_29033721.23-P1	GGCCTCAGACGGTTGCTCGT	2	2	predicted	SPDYA_+_29033771.23-P1|SPDYA_+_29033721.23-P1
TBC1D28	ENST00000345096.4	nonessential	TBC1D28_-_18545637.23-ENST00000345096.4	GATCAGTGACCTCCTCCTGT	1	1	predicted	TBC1D28_+_18545467.23-ENST00000345096.4	GTCTCCTGGTCAAAGAGGCT	2	2	predicted	TBC1D28_-_18545637.23-ENST00000345096.4|TBC1D28_+_18545467.23-ENST00000345096.4
LEMD3	P1P2	significant	LEMD3_+_65563441.23-P1P2	GTCCGGGAGACAGGCCGTAA	1	1	empirical	LEMD3_-_65563622.23-P1P2	Ggtcgcagccgcgggaccag	2	5	empirical	LEMD3_+_65563441.23-P1P2|LEMD3_-_65563622.23-P1P2
ZDHHC23	P1P2	nonessential	ZDHHC23_+_113666968.23-P1P2	GGATGGGTCGGCTTCCCCGG	1	1	predicted	ZDHHC23_-_113666793.23-P1P2	GCTGGCGCACCGAGCcgggc	2	2	predicted	ZDHHC23_+_113666968.23-P1P2|ZDHHC23_-_113666793.23-P1P2
PTPLAD1	P1P2	nonessential	PTPLAD1_-_65822842.23-P1P2	GGCGAGCGTGGGGTATCTCG	1	1	predicted	PTPLAD1_-_65822874.23-P1P2	GCAGGCGCTCAGGAGCGCTA	2	2	predicted	PTPLAD1_-_65822842.23-P1P2|PTPLAD1_-_65822874.23-P1P2
EPS15L1	P1P2	nonessential	EPS15L1_+_16582749.23-P1P2	GCGAGTCCGCGGGAAGATGG	1	1	predicted	EPS15L1_+_16582752.23-P1P2	GGCCCGAGTCCGCGGGAAGA	2	2	predicted	EPS15L1_+_16582749.23-P1P2|EPS15L1_+_16582752.23-P1P2
IL9R	P1P2	nonessential	IL9R_+_155227411.23-P1P2	GCAGTCCCATCACAAGTCTG	1	1	predicted	IL9R_-_155227448.23-P1P2	GGGACTGGGCAGATGCATCT	2	2	predicted	IL9R_+_155227411.23-P1P2|IL9R_-_155227448.23-P1P2
SMIM12	P1P2	nonessential	SMIM12_+_35325198.23-P1P2	GTACGGGAGGAGTGATCGCT	1	1	predicted	SMIM12_+_35325328.23-P1P2	GGCGGCGACTTCCGTGCTCC	2	2	predicted	SMIM12_+_35325198.23-P1P2|SMIM12_+_35325328.23-P1P2
MTA2	P1P2	significant	MTA2_+_62368883.23-P1P2	GCCGGGTGGGAGGTGAGTAC	1	5	empirical	MTA2_+_62369072.23-P1P2	GGGGCCGGGATGAACCGCGA	2	2	empirical	MTA2_+_62368883.23-P1P2|MTA2_+_62369072.23-P1P2
RIC8A	P1	significant	RIC8A_-_207729.23-P1	GCTCAGTGCCTAGACGATGG	1	1	predicted	RIC8A_-_207732.23-P1	GAGTGCCTAGACGATGGTGG	2	2	predicted	RIC8A_-_207729.23-P1|RIC8A_-_207732.23-P1
CNOT3	P1P2	significant	CNOT3_+_54641532.23-P1P2	GGACGGGGGTCGGGGCTCAA	1	2	empirical	CNOT3_-_54641691.23-P1P2	GGTCGCGATACGCTCCTCAG	2	1	empirical	CNOT3_+_54641532.23-P1P2|CNOT3_-_54641691.23-P1P2
VEZF1	P1P2	significant	VEZF1_-_56065595.23-P1P2	GcagcggcggcTCCTCAACA	1	2	empirical	VEZF1_-_56065555.23-P1P2	GGGAGGCGACAACAAAgcgg	2	3	empirical	VEZF1_-_56065595.23-P1P2|VEZF1_-_56065555.23-P1P2
GIGYF1	P2	nonessential	GIGYF1_-_100279060.23-P2	GCTATCCTCACAGCAGGAAG	1	1	predicted	GIGYF1_+_100278718.23-P2	GAGGCTGGCTGAGGTGTCCG	2	2	predicted	GIGYF1_-_100279060.23-P2|GIGYF1_+_100278718.23-P2
PIDD	P1	nonessential	PIDD_-_809477.23-P1	GGGGAACCACCAAGGAGTCA	1	1	predicted	PIDD_+_809516.23-P1	GGCCGCGGGCCTACCCGGAA	2	2	predicted	PIDD_-_809477.23-P1|PIDD_+_809516.23-P1
NR0B2	P1P2	nonessential	NR0B2_-_27240419.23-P1P2	GGCATGGGCAGGCCCCTGGT	1	1	predicted	NR0B2_+_27240409.23-P1P2	GATGAGCACCAGCCAACCAG	2	2	predicted	NR0B2_-_27240419.23-P1P2|NR0B2_+_27240409.23-P1P2
OR2T27	ENST00000344889.3	nonessential	OR2T27_-_248814115.23-ENST00000344889.3	GTGAGGGCAAAGAGAAGCCA	1	1	predicted	OR2T27_-_248813788.23-ENST00000344889.3	GTCTTGCGGCTCATGAGGAC	2	2	predicted	OR2T27_-_248814115.23-ENST00000344889.3|OR2T27_-_248813788.23-ENST00000344889.3
ZNF431	P1P2	nonessential	ZNF431_+_21324864.23-P1P2	GGAGCAGCGAAGGGGAGACC	1	1	predicted	ZNF431_-_21324920.23-P1P2	GCCTAGAGGCCCAACATCTG	2	2	predicted	ZNF431_+_21324864.23-P1P2|ZNF431_-_21324920.23-P1P2
NDRG3	P1P2	significant	NDRG3_-_35374452.23-P1P2	GggAGGCGCTCACTCACCTG	1	3	empirical	NDRG3_+_35374462.23-P1P2	GgctgctgctgcACTGACGG	2	4	empirical	NDRG3_-_35374452.23-P1P2|NDRG3_+_35374462.23-P1P2
ARX	P2	nonessential	ARX_-_25031175.23-P2	GCGAGTCGCTGCCCGCAGAG	1	1	predicted	ARX_+_25031186.23-P2	GGCTGAGGGCAAGGACGGCG	2	2	predicted	ARX_-_25031175.23-P2|ARX_+_25031186.23-P2
ATP5I	P1P2	significant	ATP5I_-_668029.23-P1P2	GGCGGAGAGACCTGCACCGG	1	1	empirical	ATP5I_+_668023.23-P1P2	GAGGGACAAGATGGTGCCAC	2	5	empirical	ATP5I_-_668029.23-P1P2|ATP5I_+_668023.23-P1P2
CPA5	P1	nonessential	CPA5_-_129984754.23-P1	GGGGATAGTTGTCTCATCAT	1	1	predicted	CPA5_-_129984735.23-P1	GCACCCTTAAGCCAAGTACA	2	2	predicted	CPA5_-_129984754.23-P1|CPA5_-_129984735.23-P1
SPATA33	P1P2	nonessential	SPATA33_+_89724482.23-P1P2	GCCGTCCGTGGCGGACTCGG	1	1	predicted	SPATA33_+_89724485.23-P1P2	GGCGCCGTCCGTGGCGGACT	2	2	predicted	SPATA33_+_89724482.23-P1P2|SPATA33_+_89724485.23-P1P2
ZCWPW1	P1P2	nonessential	ZCWPW1_+_100026235.23-P1P2	GGAGTGCTGGGCCGAGGACA	1	1	predicted	ZCWPW1_-_100026292.23-P1P2	GCCGGGCGGCGCATCTCCCC	2	2	predicted	ZCWPW1_+_100026235.23-P1P2|ZCWPW1_-_100026292.23-P1P2
RALGDS	P1	nonessential	RALGDS_+_135996619.23-P1	GGGCCGCGGGCTCACAGCGG	1	1	predicted	RALGDS_+_135996428.23-P1	GACGCCGTGCGCCTGGAGGT	2	2	predicted	RALGDS_+_135996619.23-P1|RALGDS_+_135996428.23-P1
BEX2	P1P2	nonessential	BEX2_+_102565817.23-P1P2	GAGGACGTGCGGGCCAGGTA	1	1	predicted	BEX2_+_102565866.23-P1P2	GCCGTCGCTCGCTCCCTTCT	2	2	predicted	BEX2_+_102565817.23-P1P2|BEX2_+_102565866.23-P1P2
NME1	P2	nonessential	NME1_+_49233051.23-P2	GGACCCCGCTGGACCCCATC	1	1	predicted	NME1_+_49233013.23-P2	GGTACGCTCACAGTTGGCCA	2	2	predicted	NME1_+_49233051.23-P2|NME1_+_49233013.23-P2
DEGS1	P1P2	significant	DEGS1_+_224370968.23-P1P2	GGGCTGCTCAGAggtggcgg	1	1	empirical	DEGS1_+_224370936.23-P1P2	Gtccccggctggtgtggtgt	2	6	empirical	DEGS1_+_224370968.23-P1P2|DEGS1_+_224370936.23-P1P2
FGFR1OP	P1P2	significant	FGFR1OP_+_167413231.23-P1P2	GCCCCCACGGAATGAGGCAG	1	8	empirical	FGFR1OP_-_167412853.23-P1P2	GCGCGGAGCGTACCCTGCTG	2	5	empirical	FGFR1OP_+_167413231.23-P1P2|FGFR1OP_-_167412853.23-P1P2
CFP	P1P2	nonessential	CFP_+_47489269.23-P1P2	GTAAAGCGGGACCTCCTCTC	1	1	predicted	CFP_-_47489280.23-P1P2	GTGCACCTCTACCAGAGAGG	2	2	predicted	CFP_+_47489269.23-P1P2|CFP_-_47489280.23-P1P2
FAM200A	P2	nonessential	FAM200A_+_99156139.23-P2	GCCCCGGATGAGGAACTCGG	1	1	predicted	FAM200A_+_99156136.23-P2	GCGGATGAGGAACTCGGAGG	2	2	predicted	FAM200A_+_99156139.23-P2|FAM200A_+_99156136.23-P2
PPFIA2	ENST00000549396.1	nonessential	PPFIA2_+_82153096.23-ENST00000549396.1	GCCACCGCACGAGGCAAGTG	1	1	predicted	PPFIA2_+_82153267.23-ENST00000549396.1	GCGGGCGCGTGTGCGTGAGG	2	2	predicted	PPFIA2_+_82153096.23-ENST00000549396.1|PPFIA2_+_82153267.23-ENST00000549396.1
MTBP	P1P2	significant	MTBP_-_121457707.23-P1P2	GAGTTGGGGGGTGATCTCTG	1	3	empirical	MTBP_-_121457873.23-P1P2	GGGGAACGGCTTGTGGAGAG	2	6	empirical	MTBP_-_121457707.23-P1P2|MTBP_-_121457873.23-P1P2
OR1M1	ENST00000429566.3	nonessential	OR1M1_+_9204300.23-ENST00000429566.3	GCTTGGCGTAGTGCAATGGG	1	1	predicted	OR1M1_+_9204231.23-ENST00000429566.3	GGTCCACGATGCCAAAGAAA	2	2	predicted	OR1M1_+_9204300.23-ENST00000429566.3|OR1M1_+_9204231.23-ENST00000429566.3
SHPRH	P1P2	significant	SHPRH_-_146285139.23-P1P2	GTCCGGGATCGGGAAGAGGT	1	4	empirical	SHPRH_-_146285446.23-P1P2	GGAACGTGTAGGGGTCCCCC	2	4	empirical	SHPRH_-_146285139.23-P1P2|SHPRH_-_146285446.23-P1P2
PSMG3	P1	significant	PSMG3_-_1609603.23-P1	GGAGGCCGGCCGGGCTACTG	1	3	empirical	PSMG3_+_1609624.23-P1	GTGGTGAGCGCGGGTACCCG	2	4	empirical	PSMG3_-_1609603.23-P1|PSMG3_+_1609624.23-P1
OAZ3	P1	significant	OAZ3_+_151739231.23-P1	GCCCCTCTTGATATAAGAAA	1	1	predicted	OAZ3_+_151739268.23-P1	GTGGTGACCAGATCGGGTAG	2	2	predicted	OAZ3_+_151739231.23-P1|OAZ3_+_151739268.23-P1
ANKRD32	P1P2	significant	ANKRD32_+_93954429.23-P1P2	GCTTCCTTCGGTGGCAGCGG	1	1	empirical	ANKRD32_+_93954716.23-P1P2	GTCGGTGGCAGTCCCCGCAG	2	4	empirical	ANKRD32_+_93954429.23-P1P2|ANKRD32_+_93954716.23-P1P2
FOXI3	P1P2	significant	FOXI3_+_88752192.23-P1P2	GGCTAGCACCCGCCCGACCC	1	4	empirical	FOXI3_-_88752153.23-P1P2	GCCTTTGGGGGCCAACCCTG	2	2	empirical	FOXI3_+_88752192.23-P1P2|FOXI3_-_88752153.23-P1P2
SOGA1	P1P2	nonessential	SOGA1_+_35491862.23-P1P2	GGCGGTGTCGGGGCCGAGGT	1	1	predicted	SOGA1_-_35491725.23-P1P2	GGACCGCAGCCCCGGACCGG	2	2	predicted	SOGA1_+_35491862.23-P1P2|SOGA1_-_35491725.23-P1P2
LOXHD1	ENST00000536736.1	significant	LOXHD1_+_44236533.23-ENST00000536736.1	GTCCAGTCTGGTCCCCGAGT	1	3	empirical	LOXHD1_+_44236969.23-ENST00000536736.1	GGCCCCAGAAGAAAAGGCGG	1	1	predicted	LOXHD1_+_44236533.23-ENST00000536736.1|LOXHD1_+_44236969.23-ENST00000536736.1
GALNT11	P1P2	nonessential	GALNT11_+_151722933.23-P1P2	GCCCAGGATCGCCGCCTTCT	1	1	predicted	GALNT11_-_151722892.23-P1P2	GCCGCGCCGCTCCTGCGGGT	2	2	predicted	GALNT11_+_151722933.23-P1P2|GALNT11_-_151722892.23-P1P2
ATG2A	P1P2	nonessential	ATG2A_-_64684556.23-P1P2	GGTAGTGGTGCAGCAAGTAG	1	1	predicted	ATG2A_-_64684666.23-P1P2	GCCCGCCGGCGATCCCCGTC	2	2	predicted	ATG2A_-_64684556.23-P1P2|ATG2A_-_64684666.23-P1P2
GOLGA2	P1P2	nonessential	GOLGA2_-_131037978.23-P1P2	GCCAGCCCAAAGTCACCCGG	1	1	predicted	GOLGA2_-_131038280.23-P1P2	GGCGATCCCGGCAACCACTG	2	2	predicted	GOLGA2_-_131037978.23-P1P2|GOLGA2_-_131038280.23-P1P2
HPS6	P1P2	nonessential	HPS6_+_103825154.23-P1P2	GGGCGAGGCCCGATTCTCGG	1	1	predicted	HPS6_-_103825186.23-P1P2	GCGGGCCTCGCCCTGCTGGG	2	2	predicted	HPS6_+_103825154.23-P1P2|HPS6_-_103825186.23-P1P2
WIPF2	P1P2	nonessential	WIPF2_+_38375550.23-P1P2	GGCGTCCGCGAACAAAATGG	1	1	predicted	WIPF2_-_38375618.23-P1P2	GTCCGGGTTGGCAAAAGGgg	2	2	predicted	WIPF2_+_38375550.23-P1P2|WIPF2_-_38375618.23-P1P2
BTN3A1	P1P2	nonessential	BTN3A1_+_26402505.23-P1P2	GAGACTGTCGGGTCATCGTG	1	1	predicted	BTN3A1_+_26402516.23-P1P2	GAAAGAAAGCAGAGACTGTC	2	2	predicted	BTN3A1_+_26402505.23-P1P2|BTN3A1_+_26402516.23-P1P2
HACE1	P1P2	nonessential	HACE1_+_105307709.23-P1P2	GGCGGCGGCGGGTGTACTGT	1	1	predicted	HACE1_+_105307706.23-P1P2	GGCGGCGGGTGTACTGTAGG	2	2	predicted	HACE1_+_105307709.23-P1P2|HACE1_+_105307706.23-P1P2
ELOVL1	P1P2	significant	ELOVL1_-_43833593.23-P1P2	GGGTCCAGACTCACCCGTAG	1	6	empirical	ELOVL1_-_43833608.23-P1P2	GGTAGGGGCCAGGCGGGCAA	2	3	empirical	ELOVL1_-_43833593.23-P1P2|ELOVL1_-_43833608.23-P1P2
ZFYVE26	P1P2	nonessential	ZFYVE26_-_68283162.23-P1P2	GGACGAATCTGTGTCATAAG	1	1	predicted	ZFYVE26_+_68283109.23-P1P2	GCAATCCTCTGCCTTAACAG	2	2	predicted	ZFYVE26_-_68283162.23-P1P2|ZFYVE26_+_68283109.23-P1P2
DTX4	P1P2	nonessential	DTX4_-_58939675.23-P1P2	GCGAGGCGCAACTGGTGCGA	1	1	predicted	DTX4_-_58939652.23-P1P2	GCCCACCCCGGCGTCTGCAG	2	2	predicted	DTX4_-_58939675.23-P1P2|DTX4_-_58939652.23-P1P2
VPS33A	P1P2	significant	VPS33A_+_122750974.23-P1P2	GGGACTCGGTTGGCGTTGTG	1	4	empirical	VPS33A_+_122750997.23-P1P2	GGTGGTCCTCCCGTAGGAAC	2	6	empirical	VPS33A_+_122750974.23-P1P2|VPS33A_+_122750997.23-P1P2
MT1B	P1P2	nonessential	MT1B_-_56685858.23-P1P2	GAGGAACTCCAGGCTTGTCT	1	1	predicted	MT1B_+_56685861.23-P1P2	GGGAGCAGTTGGGATCCATT	2	2	predicted	MT1B_-_56685858.23-P1P2|MT1B_+_56685861.23-P1P2
C11orf48	P1	nonessential	C11orf48_+_62432624.23-P1	GCGACTATGGGAGCTCCGGG	1	1	predicted	C11orf48_+_62432651.23-P1	GTACGGACCGTGAACTGGAG	2	2	predicted	C11orf48_+_62432624.23-P1|C11orf48_+_62432651.23-P1
EPDR1	P1P2	nonessential	EPDR1_-_37960257.23-P1P2	GTGAGCAGTGAAAACCGAAG	1	1	predicted	EPDR1_+_37960468.23-P1P2	GGAGGCGTCCGGGATCAGAG	2	2	predicted	EPDR1_-_37960257.23-P1P2|EPDR1_+_37960468.23-P1P2
HTR3C	P1P2	nonessential	HTR3C_+_183770899.23-P1P2	GCTGACAGTGAGGCAGAGGA	1	1	predicted	HTR3C_+_183770842.23-P1P2	GCTTTCTGGACTCTTCTCTG	2	2	predicted	HTR3C_+_183770899.23-P1P2|HTR3C_+_183770842.23-P1P2
OR1G1	ENST00000328890.2	nonessential	OR1G1_-_3030803.23-ENST00000328890.2	GCAGCTGCTCAGAGAACCCC	1	1	predicted	OR1G1_-_3030806.23-ENST00000328890.2	GCTGCTCAGAGAACCCCAGG	2	2	predicted	OR1G1_-_3030803.23-ENST00000328890.2|OR1G1_-_3030806.23-ENST00000328890.2
GPR62	P1P2	nonessential	GPR62_+_51989466.23-P1P2	GAGGCCCATGGAGGGGTGCA	1	1	predicted	GPR62_-_51989484.23-P1P2	GCATCCTTGCACCCCTCCAT	2	2	predicted	GPR62_+_51989466.23-P1P2|GPR62_-_51989484.23-P1P2
SHARPIN	P1P2	nonessential	SHARPIN_-_145158606.23-P1P2	GACAGCCAAGAGCACTGCGG	1	1	predicted	SHARPIN_-_145158579.23-P1P2	GGCGCCCAGCGGCCTCACCG	2	2	predicted	SHARPIN_-_145158606.23-P1P2|SHARPIN_-_145158579.23-P1P2
BAHD1	P1P2	significant	BAHD1_-_40733183.23-P1P2	GGGAACCGCGAGCGGCGTAG	1	3	empirical	BAHD1_+_40733399.23-P1P2	GcggccgggcTGGAATCCGG	2	4	empirical	BAHD1_-_40733183.23-P1P2|BAHD1_+_40733399.23-P1P2
LAMTOR4	P1P2	significant	LAMTOR4_+_99746556.23-P1P2	GGGGGAGCTCCCTACCAGAT	1	4	empirical	LAMTOR4_-_99746568.23-P1P2	GCGGAAGCTACCTATCTGGT	2	1	empirical	LAMTOR4_+_99746556.23-P1P2|LAMTOR4_-_99746568.23-P1P2
AURKC	P1P2	nonessential	AURKC_-_57742487.23-P1P2	GTAGCAGTGAGACATCAGTG	1	1	predicted	AURKC_+_57742897.23-P1P2	GAGTAAGGTAAGGTAgggag	2	2	predicted	AURKC_-_57742487.23-P1P2|AURKC_+_57742897.23-P1P2
MDK	P1P2	nonessential	MDK_-_46403338.23-P1P2	Gcggcggcccctggtccgcc	1	1	predicted	MDK_-_46403297.23-P1P2	GggAGGGAGCGAAGCAGCGC	2	2	predicted	MDK_-_46403338.23-P1P2|MDK_-_46403297.23-P1P2
UNC93B1	P1P2	nonessential	UNC93B1_-_67771529.23-P1P2	GTCCATGGCCCGAACTACTG	1	1	predicted	UNC93B1_+_67771544.23-P1P2	GGGCGGTCGCAGGGACTCCG	2	2	predicted	UNC93B1_-_67771529.23-P1P2|UNC93B1_+_67771544.23-P1P2
CLCN6	P1P2	nonessential	CLCN6_-_11866312.23-P1P2	GGGGTCCAGAGTGGCAGTAA	1	1	predicted	CLCN6_-_11866315.23-P1P2	GTCCAGAGTGGCAGTAAAGG	2	2	predicted	CLCN6_-_11866312.23-P1P2|CLCN6_-_11866315.23-P1P2
KIAA1191	P1P2	nonessential	KIAA1191_+_175788765.23-P1P2	GGTGCTGCCTGCCCGCTGGG	1	1	predicted	KIAA1191_-_175788756.23-P1P2	GAAGGTCCCCAAGACCCACT	2	2	predicted	KIAA1191_+_175788765.23-P1P2|KIAA1191_-_175788756.23-P1P2
FOXP1	ENST00000498215.1	nonessential	FOXP1_-_71294250.23-ENST00000498215.1	GGCAGAAGCGAGAGTTCCGT	1	1	predicted	FOXP1_-_71294106.23-ENST00000498215.1	GGAGCCCTCAGATGAAGTGA	2	2	predicted	FOXP1_-_71294250.23-ENST00000498215.1|FOXP1_-_71294106.23-ENST00000498215.1
TMED8	P1P2	nonessential	TMED8_-_77843412.23-P1P2	GGACATCTGCAGCCCGCGCA	1	1	predicted	TMED8_+_77843429.23-P1P2	GCTGTTTCCGGAGCCACTCG	2	2	predicted	TMED8_-_77843412.23-P1P2|TMED8_+_77843429.23-P1P2
APCS	P1P2	nonessential	APCS_+_159557645.23-P1P2	GAGGGTAGCAGACAACACAG	1	1	predicted	APCS_+_159557663.23-P1P2	GGAAGCAGTGACCAGGATGA	2	2	predicted	APCS_+_159557645.23-P1P2|APCS_+_159557663.23-P1P2
PDCD2L	P1P2	nonessential	PDCD2L_+_34895353.23-P1P2	GCTCGAAGGCCCAGCAGCAC	1	1	predicted	PDCD2L_+_34895342.23-P1P2	GAGCAGCACCGGCTTCAGAA	2	2	predicted	PDCD2L_+_34895353.23-P1P2|PDCD2L_+_34895342.23-P1P2
ZNF585A	P1P2	nonessential	ZNF585A_-_37663591.23-P1P2	GACCAGCGGCAAAAAAGCCT	1	1	predicted	ZNF585A_-_37663577.23-P1P2	GAAAATACTCCTGACACCAG	2	2	predicted	ZNF585A_-_37663591.23-P1P2|ZNF585A_-_37663577.23-P1P2
ZNF43	P1	nonessential	ZNF43_+_22018618.23-P1	GCCGGCCTGCAGCCCTCTGT	1	1	predicted	ZNF43_-_22018763.23-P1	GCTCCGGCACGCGCAGATTG	2	2	predicted	ZNF43_+_22018618.23-P1|ZNF43_-_22018763.23-P1
ARHGEF4	P1P2	nonessential	ARHGEF4_-_131792637.23-P1P2	GCCTGTGCGGCGGGATCTCG	1	1	predicted	ARHGEF4_-_131792624.23-P1P2	GCCACCGGCTCGGCCCTGTG	2	2	predicted	ARHGEF4_-_131792637.23-P1P2|ARHGEF4_-_131792624.23-P1P2
ZNF135	P1P2	nonessential	ZNF135_-_58570700.23-P1P2	GTGAGCTAGGCCGGCGAGGA	1	1	predicted	ZNF135_-_58570687.23-P1P2	GGCAGTCAGGAGGGTGAGCT	2	2	predicted	ZNF135_-_58570700.23-P1P2|ZNF135_-_58570687.23-P1P2
ATXN7L2	P1P2	nonessential	ATXN7L2_-_110026622.23-P1P2	Gagcaatggccgctctggag	1	1	predicted	ATXN7L2_+_110026609.23-P1P2	GGGCACccgccgctccagag	2	2	predicted	ATXN7L2_-_110026622.23-P1P2|ATXN7L2_+_110026609.23-P1P2
BLZF1	P1P2	nonessential	BLZF1_-_169337488.23-P1P2	GGGGCGGGTCGGCTTCCGAA	1	1	predicted	BLZF1_-_169337459.23-P1P2	GGAGAGAGCTGCTGGATATG	2	2	predicted	BLZF1_-_169337488.23-P1P2|BLZF1_-_169337459.23-P1P2
DGAT1	P1P2	nonessential	DGAT1_-_145550519.23-P1P2	GCTCCGGAGCCGCTAACTAA	1	1	predicted	DGAT1_+_145550456.23-P1P2	GAGGCCGACGGGCCTGACGC	2	2	predicted	DGAT1_-_145550519.23-P1P2|DGAT1_+_145550456.23-P1P2
IFNA13	ENST00000449498.1	nonessential	IFNA13_+_21368002.23-ENST00000449498.1	GGCATCTGCAATATCTATGA	1	1	predicted	IFNA13_-_21368030.23-ENST00000449498.1	GAGATATTGCAGATGCTTCT	2	2	predicted	IFNA13_+_21368002.23-ENST00000449498.1|IFNA13_-_21368030.23-ENST00000449498.1
TINF2	P1P2	significant	TINF2_+_24711802.23-P1P2	GACCCTCGGGCTCGAGACAG	1	1	empirical	TINF2_+_24711839.23-P1P2	GGGGCAAGGGAAGCTAGTAG	2	4	empirical	TINF2_+_24711802.23-P1P2|TINF2_+_24711839.23-P1P2
COL13A1	P1P2	nonessential	COL13A1_-_71561703.23-P1P2	GGGAGTGTGTCAAGTTACAG	1	1	predicted	COL13A1_+_71561754.23-P1P2	GCGCACACGGAGGGCCCCAT	2	2	predicted	COL13A1_-_71561703.23-P1P2|COL13A1_+_71561754.23-P1P2
IL36G	P1P2	nonessential	IL36G_+_113735608.23-P1P2	GAGTCCAGGGGACTGAATCG	1	1	predicted	IL36G_+_113735641.23-P1P2	GGACTATACCTGGCAAGAAA	2	2	predicted	IL36G_+_113735608.23-P1P2|IL36G_+_113735641.23-P1P2
SH3TC1	P1P2	nonessential	SH3TC1_+_8201111.23-P1P2	GCCTGCGGCGTGTTCCTCAG	1	1	predicted	SH3TC1_+_8201070.23-P1P2	GGCCGTAGCACGCAGGAACC	2	2	predicted	SH3TC1_+_8201111.23-P1P2|SH3TC1_+_8201070.23-P1P2
WDR3	P1P2	essential	WDR3_-_118472399.23-P1P2	GTCGGCTGGGAGCCTCGTGG	1	3	essential	WDR3_+_118472389.23-P1P2	GACTCACCTCAGCCTCCACG	2	2	essential	WDR3_-_118472399.23-P1P2|WDR3_+_118472389.23-P1P2
SSNA1	P1P2	significant	SSNA1_+_140083500.23-P1P2	GTATGCCTGGGGGCCGGGAG	1	8	empirical	SSNA1_+_140083300.23-P1P2	GCGCAGCGAGGCGGGTCCAG	2	4	empirical	SSNA1_+_140083500.23-P1P2|SSNA1_+_140083300.23-P1P2
CNTROB	P1P2	nonessential	CNTROB_-_7835514.23-P1P2	GGTCATCGAGGCGAGAGAGG	1	1	predicted	CNTROB_+_7835608.23-P1P2	GTCCCCAATTTGCCAAAGTG	2	2	predicted	CNTROB_-_7835514.23-P1P2|CNTROB_+_7835608.23-P1P2
FGR	P1P2	nonessential	FGR_+_27961627.23-P1P2	GCCCCGCACGCCGGCACTCG	1	1	predicted	FGR_-_27961603.23-P1P2	GCCAATTCTGCCCGGCCCCG	2	2	predicted	FGR_+_27961627.23-P1P2|FGR_-_27961603.23-P1P2
DENND4C	ENST00000602925.1	nonessential	DENND4C_-_19230442.23-ENST00000602925.1	GCCGCCCCCGCAGGAGGAAA	1	1	predicted	DENND4C_+_19230793.23-ENST00000602925.1	GTGTCAGCGCAGCCCCGACA	2	2	predicted	DENND4C_-_19230442.23-ENST00000602925.1|DENND4C_+_19230793.23-ENST00000602925.1
FMO4	P1P2	nonessential	FMO4_+_171283335.23-P1P2	GGCAGAAAGTATACAGACTA	1	1	predicted	FMO4_-_171283386.23-P1P2	GGCATAACAGAAAAGACGAA	2	2	predicted	FMO4_+_171283335.23-P1P2|FMO4_-_171283386.23-P1P2
XRCC2	P1P2	significant	XRCC2_-_152373149.23-P1P2	GGGTCCCAGACTCAGCCCTA	1	4	empirical	XRCC2_-_152373174.23-P1P2	GGCACTACACATCGCCCCGA	2	1	empirical	XRCC2_-_152373149.23-P1P2|XRCC2_-_152373174.23-P1P2
WBP2	P1P2	nonessential	WBP2_+_73851374.23-P1P2	GACCCCTGTTGGAGAGACTA	1	1	predicted	WBP2_+_73851385.23-P1P2	GTGAGTCTCGGGACCCCTGT	2	2	predicted	WBP2_+_73851374.23-P1P2|WBP2_+_73851385.23-P1P2
HTR5A	P2	nonessential	HTR5A_-_154862068.23-P2	GGGAGCTGCAGCCTCCGAAG	1	1	predicted	HTR5A_-_154862093.23-P2	GCGGGGGCAACAGGGACAGA	2	2	predicted	HTR5A_-_154862068.23-P2|HTR5A_-_154862093.23-P2
MYO1C	P1	nonessential	MYO1C_+_1388992.23-P1	GccgggcAGGATGCGCTACC	1	1	predicted	MYO1C_+_1388664.23-P1	GGTGAGGACAAGCCTGGGAG	2	2	predicted	MYO1C_+_1388992.23-P1|MYO1C_+_1388664.23-P1
KIAA0930	P1	nonessential	KIAA0930_+_45636700.23-P1	GacggcgacgCGCACAGAGG	1	1	predicted	KIAA0930_+_45636703.23-P1	GgcgacggcgacgCGCACAG	2	2	predicted	KIAA0930_+_45636700.23-P1|KIAA0930_+_45636703.23-P1
PRSS16	P2	nonessential	PRSS16_-_27219050.23-P2	GGCGGGTCCCTGGAGGTAGG	1	1	predicted	PRSS16_+_27219020.23-P2	GTCCAGGGACCCGCCGATCG	2	2	predicted	PRSS16_-_27219050.23-P2|PRSS16_+_27219020.23-P2
MED9	P1P2	essential	MED9_-_17380350.23-P1P2	GCCTCTGGCTAACCTACCCC	1	5	essential	MED9_-_17380394.23-P1P2	GGCAGCCGGGCGACAGGCGG	2	7	essential	MED9_-_17380350.23-P1P2|MED9_-_17380394.23-P1P2
NRXN2	ENST00000377551.1,ENST00000409571.1	nonessential	NRXN2_+_64481378.23-ENST00000377551.1,ENST00000409571.1	GCTTCTGTCGGAgcccgcgg	1	1	predicted	NRXN2_-_64481358.23-ENST00000377551.1,ENST00000409571.1	GGATGCCGGCTTCCCTCAgg	2	2	predicted	NRXN2_+_64481378.23-ENST00000377551.1,ENST00000409571.1|NRXN2_-_64481358.23-ENST00000377551.1,ENST00000409571.1
NFE4	P1P2	significant	NFE4_+_102614089.23-P1P2	Ggtccacgggggacgaagac	1	2	empirical	NFE4_+_102614077.23-P1P2	Gcgaagaccggagcccctcc	1	1	predicted	NFE4_+_102614089.23-P1P2|NFE4_+_102614077.23-P1P2
ASB15	P1P2	nonessential	ASB15_+_123241932.23-P1P2	GATCTTGTCATTCTTATCCA	1	1	predicted	ASB15_-_123241904.23-P1P2	GGAAGCACACATTGGCTCCA	2	2	predicted	ASB15_+_123241932.23-P1P2|ASB15_-_123241904.23-P1P2
OR2G6	ENST00000343414.4	nonessential	OR2G6_+_248685132.23-ENST00000343414.4	GCACACACGAGAGGTTGCTG	1	1	predicted	OR2G6_-_248684950.23-ENST00000343414.4	GCCTGAAGCTGCAGGAAAAA	2	2	predicted	OR2G6_+_248685132.23-ENST00000343414.4|OR2G6_-_248684950.23-ENST00000343414.4
CHRNA3	P1P2	nonessential	CHRNA3_-_78913435.23-P1P2	GGGTCCCAGTCCCCAGCGCC	1	1	predicted	CHRNA3_+_78913301.23-P1P2	GTGTCCTCCCGCGGGTCCGA	2	2	predicted	CHRNA3_-_78913435.23-P1P2|CHRNA3_+_78913301.23-P1P2
IFNA1	ENST00000276927.1	significant	IFNA1_-_21440889.23-ENST00000276927.1	GCTGTGTGATGCAGGAGGAG	1	7	empirical	IFNA1_+_21440467.23-ENST00000276927.1	GCTTCTGGGCTTGCTGAGAT	2	5	empirical	IFNA1_-_21440889.23-ENST00000276927.1|IFNA1_+_21440467.23-ENST00000276927.1
HPS4	P1P2	nonessential	HPS4_+_26879709.23-P1P2	GGGTACGGGGCAGAAGTCGC	1	1	predicted	HPS4_+_26879722.23-P1P2	GTGCCGCGCGCGCAGGTACG	2	2	predicted	HPS4_+_26879709.23-P1P2|HPS4_+_26879722.23-P1P2
HNF4G	P1	nonessential	HNF4G_-_76320305.23-P1	GCCTCGGGCGGCTGAAGGAG	1	1	predicted	HNF4G_+_76320274.23-P1	GAGCCGCCCGAGGGGAACCG	2	2	predicted	HNF4G_-_76320305.23-P1|HNF4G_+_76320274.23-P1
RTDR1	P1P2	nonessential	RTDR1_+_23484183.23-P1P2	GTGTCGCCTGGCAACTGAAT	1	1	predicted	RTDR1_+_23484179.23-P1P2	GGCCTGGCAACTGAATAGGT	2	2	predicted	RTDR1_+_23484183.23-P1P2|RTDR1_+_23484179.23-P1P2
DNAJB8	P1P2	nonessential	DNAJB8_-_128182308.23-P1P2	GCCCCCACTGAGAGGAGTGG	1	1	predicted	DNAJB8_-_128182305.23-P1P2	GGGGCCCCCACTGAGAGGAG	2	2	predicted	DNAJB8_-_128182308.23-P1P2|DNAJB8_-_128182305.23-P1P2
HOMER2	P1P2	nonessential	HOMER2_+_83621408.23-P1P2	GgCAGCCCCGCGGAATGGAG	1	1	predicted	HOMER2_-_83621423.23-P1P2	GCCGGCGCCGCTCCATTCCG	2	2	predicted	HOMER2_+_83621408.23-P1P2|HOMER2_-_83621423.23-P1P2
NPY4R	P1P2	nonessential	NPY4R_-_47083480.23-P1P2	GCCGCACGCAGGCAGCATCG	1	1	predicted	NPY4R_+_47083659.23-P1P2	GAGACTGAGGTCCACAGTGG	2	2	predicted	NPY4R_-_47083480.23-P1P2|NPY4R_+_47083659.23-P1P2
CYBRD1	P1P2	nonessential	CYBRD1_-_172379048.23-P1P2	GCCCCCGCGGTGCGGAGTAT	1	1	predicted	CYBRD1_-_172378997.23-P1P2	GCCGCCCGGCCACTACCCAG	2	2	predicted	CYBRD1_-_172379048.23-P1P2|CYBRD1_-_172378997.23-P1P2
DEPDC1	P1P2	nonessential	DEPDC1_-_68962714.23-P1P2	GCGCCCGGTGGCGTCCATGG	1	1	predicted	DEPDC1_-_68962684.23-P1P2	GGCACACCCTGACTCTCCAT	2	2	predicted	DEPDC1_-_68962714.23-P1P2|DEPDC1_-_68962684.23-P1P2
IL31RA	P1	nonessential	IL31RA_+_55147208.23-P1	Gagagtgctggagtgctgtc	1	1	predicted	IL31RA_-_55147239.23-P1	Gctccagcactctgcttggg	2	2	predicted	IL31RA_+_55147208.23-P1|IL31RA_-_55147239.23-P1
LIME1	P2	nonessential	LIME1_-_62369591.23-P2	GCACTGGCTGGAGGTGTCCA	1	1	predicted	LIME1_+_62369547.23-P2	GGGGCGCAGGAGATCCATGC	2	2	predicted	LIME1_-_62369591.23-P2|LIME1_+_62369547.23-P2
LRRC8C	P1P2	nonessential	LRRC8C_-_90098721.23-P1P2	GGCCCGCGAAGAGAAGTAGG	1	1	predicted	LRRC8C_-_90098887.23-P1P2	GCTCTCGCGCCCGGAGGTAA	2	2	predicted	LRRC8C_-_90098721.23-P1P2|LRRC8C_-_90098887.23-P1P2
RGAG1	ENST00000465301.2	nonessential	RGAG1_+_109662299.23-ENST00000465301.2	GATTCACAGTCAGTAGGGCG	1	1	predicted	RGAG1_-_109662354.23-ENST00000465301.2	GGGAGCGCCTACCTTGTGCA	2	2	predicted	RGAG1_+_109662299.23-ENST00000465301.2|RGAG1_-_109662354.23-ENST00000465301.2
TBC1D3F	ENST00000539424.1	nonessential	TBC1D3F_+_36286287.23-ENST00000539424.1	GTGTAGCTCTAGGGGAATGG	1	1	predicted	TBC1D3F_-_36286095.23-ENST00000539424.1	GATGGAGACTGGGCTAGGTC	2	2	predicted	TBC1D3F_+_36286287.23-ENST00000539424.1|TBC1D3F_-_36286095.23-ENST00000539424.1
TXLNB	P1P2	nonessential	TXLNB_-_139613151.23-P1P2	GACAGCAGGAGAGGGCGGGC	1	1	predicted	TXLNB_-_139613168.23-P1P2	GGCTGGCTGTGTTCTTACAA	2	2	predicted	TXLNB_-_139613151.23-P1P2|TXLNB_-_139613168.23-P1P2
TNFSF11	P1P2	nonessential	TNFSF11_-_43148349.23-P1P2	GAAGTCGGCGCCCCACGTCG	1	1	predicted	TNFSF11_+_43148339.23-P1P2	GCTGCGGCGGAGCCTCGACG	2	2	predicted	TNFSF11_-_43148349.23-P1P2|TNFSF11_+_43148339.23-P1P2
EML3	P1P2	significant	EML3_-_62380021.23-P1P2	GAGGGGAAGGGGAAGCACCC	1	2	empirical	EML3_+_62380154.23-P1P2	GCACCCCCGGGAGCCGAGAG	2	3	empirical	EML3_-_62380021.23-P1P2|EML3_+_62380154.23-P1P2
SRMS	P1P2	nonessential	SRMS_+_62179075.23-P1P2	GCCAGACGCCAAGGAGGTCG	1	1	predicted	SRMS_+_62179081.23-P1P2	GTGCACTCCAGACGCCAAGG	2	2	predicted	SRMS_+_62179075.23-P1P2|SRMS_+_62179081.23-P1P2
TGFBI	P1	nonessential	TGFBI_+_135364702.23-P1	GGAGCGAGCTAGCGACCGAC	1	1	predicted	TGFBI_+_135364737.23-P1	GCACGAAGAGCGCCATGGAG	2	2	predicted	TGFBI_+_135364702.23-P1|TGFBI_+_135364737.23-P1
ANKRD17	P1P2	significant	ANKRD17_+_74124528.23-P1P2	GGTGAGAGCTGGCGGAgcgg	1	7	empirical	ANKRD17_+_74124315.23-P1P2	Ggaagggagccccccggcgg	2	1	empirical	ANKRD17_+_74124528.23-P1P2|ANKRD17_+_74124315.23-P1P2
USP9X	P1P2	significant	USP9X_+_40945320.23-P1P2	GTCACAACCAGGGCACACGG	1	3	empirical	USP9X_-_40944738.23-P1P2	GTGACGAGGACGGGCATCCG	2	1	empirical	USP9X_+_40945320.23-P1P2|USP9X_-_40944738.23-P1P2
NSRP1	P1P2	essential	NSRP1_-_28443894.23-P1P2	GGGCAGGCAGTGAGTGATCC	1	5	essential	NSRP1_-_28443874.23-P1P2	GGGAGCAAGATGGCGATTCC	2	3	essential	NSRP1_-_28443894.23-P1P2|NSRP1_-_28443874.23-P1P2
PCDHGB2	P1P2	nonessential	PCDHGB2_-_140739601.23-P1P2	GGAGAAGGCCAGTATAGATT	1	1	predicted	PCDHGB2_+_140739630.23-P1P2	GGATGGCAGAATCCGGGCTA	2	2	predicted	PCDHGB2_-_140739601.23-P1P2|PCDHGB2_+_140739630.23-P1P2
C16orf93	P1P2	significant	C16orf93_+_30773828.23-P1P2	GGCGATGCAGGGTCCCCTGA	1	1	empirical	C16orf93_+_30773840.23-P1P2	GGCGGCGGCTGGAGCGATGC	2	2	empirical	C16orf93_+_30773828.23-P1P2|C16orf93_+_30773840.23-P1P2
CHI3L2	P1	nonessential	CHI3L2_-_111770387.23-P1	GATGGACCAGAAGTCTCTCT	1	1	predicted	CHI3L2_-_111770369.23-P1	GGATATGGGAGCAACCACCA	2	2	predicted	CHI3L2_-_111770387.23-P1|CHI3L2_-_111770369.23-P1
RHOV	P1P2	nonessential	RHOV_+_41166415.23-P1P2	GCCTGGACCCATTCAGTCAG	1	1	predicted	RHOV_+_41166367.23-P1P2	GCGCAGCGAAGCCGAGACCC	2	2	predicted	RHOV_+_41166415.23-P1P2|RHOV_+_41166367.23-P1P2
XXYLT1	P1P2	nonessential	XXYLT1_+_194991832.23-P1P2	GCCGGCGTCCGGGTACCCGA	1	1	predicted	XXYLT1_-_194991839.23-P1P2	GGCAACGCGGGAGAGCCCTC	2	2	predicted	XXYLT1_+_194991832.23-P1P2|XXYLT1_-_194991839.23-P1P2
ZNF273	P2	nonessential	ZNF273_+_64342933.23-P2	Gactagtcgccaggcaacga	1	1	predicted	ZNF273_-_64342970.23-P2	Gactagtccctgcggcttag	2	2	predicted	ZNF273_+_64342933.23-P2|ZNF273_-_64342970.23-P2
PPFIA3	P1	nonessential	PPFIA3_+_49631881.23-P1	GGAAGGAGTGGCACCAGAGT	1	1	predicted	PPFIA3_+_49631936.23-P1	GGTCGGGGTCAAGGAACCGG	2	2	predicted	PPFIA3_+_49631881.23-P1|PPFIA3_+_49631936.23-P1
MAGEA4	P1P2	significant	MAGEA4_+_151081768.23-P1P2	Gggaggatgggagtgtagat	1	6	empirical	MAGEA4_-_151081406.23-P1P2	GACTCGCAGCTTGAGACTGG	1	1	predicted	MAGEA4_+_151081768.23-P1P2|MAGEA4_-_151081406.23-P1P2
SGK3	ENST00000521198.2	significant	SGK3_+_67624766.23-ENST00000521198.2	GCCCCGAGGACCCCCGCGAA	1	6	empirical	SGK3_-_67625072.23-ENST00000521198.2	GCAGCACCGCGGGGCCAGGT	2	5	empirical	SGK3_+_67624766.23-ENST00000521198.2|SGK3_-_67625072.23-ENST00000521198.2
AKAP9	P1P2	nonessential	AKAP9_+_91570225.23-P1P2	GGGATCGTCCTCAGCCGCAC	1	1	predicted	AKAP9_+_91570248.23-P1P2	GAAGCAGTCTCCGCGCTCAC	2	2	predicted	AKAP9_+_91570225.23-P1P2|AKAP9_+_91570248.23-P1P2
DCAF12	P1P2	nonessential	DCAF12_-_34126663.23-P1P2	GAGAATGAGCGGCTTTCCGA	1	1	predicted	DCAF12_-_34126652.23-P1P2	GAAGGGGAAGCGAGAATGAG	2	2	predicted	DCAF12_-_34126663.23-P1P2|DCAF12_-_34126652.23-P1P2
C4orf22	P1P2	nonessential	C4orf22_-_81256939.23-P1P2	GCGCAATGGATCAGGAAGAG	1	1	predicted	C4orf22_-_81256925.23-P1P2	GTCGGCCGAGGATACCGCAA	2	2	predicted	C4orf22_-_81256939.23-P1P2|C4orf22_-_81256925.23-P1P2
CXorf22	P1P2	nonessential	CXorf22_+_35937951.23-P1P2	GCATGGCGAGGGAACCTCTG	1	1	predicted	CXorf22_-_35937932.23-P1P2	GCAGCCATGAACACCCAAAA	2	2	predicted	CXorf22_+_35937951.23-P1P2|CXorf22_-_35937932.23-P1P2
TMEM178B	P1P2	nonessential	TMEM178B_+_140774083.23-P1P2	GCGCTTGGCGGCTACACCAT	1	1	predicted	TMEM178B_-_140774062.23-P1P2	GTTCCGGGTGCGGCGAGGGA	2	2	predicted	TMEM178B_+_140774083.23-P1P2|TMEM178B_-_140774062.23-P1P2
SARDH	P1P2	nonessential	SARDH_+_136603430.23-P1P2	GTTGGGAAGCAAGAAGGTGA	1	1	predicted	SARDH_+_136603393.23-P1P2	GAAGCACTCTTAGGGCCGAG	2	2	predicted	SARDH_+_136603430.23-P1P2|SARDH_+_136603393.23-P1P2
SUSD2	P1P2	nonessential	SUSD2_+_24577576.23-P1P2	GGACAGACGGGGACACAGAA	1	1	predicted	SUSD2_-_24577641.23-P1P2	GCCTGGGCTGACATCCCTCT	2	2	predicted	SUSD2_+_24577576.23-P1P2|SUSD2_-_24577641.23-P1P2
TMPRSS11F	P1P2	nonessential	TMPRSS11F_-_68995553.23-P1P2	GCATCATGAACCCAGGACTG	1	1	predicted	TMPRSS11F_-_68995546.23-P1P2	GACGCGTACATCATGAACCC	2	2	predicted	TMPRSS11F_-_68995553.23-P1P2|TMPRSS11F_-_68995546.23-P1P2
SENP1	P1P2	significant	SENP1_-_48499614.23-P1P2	GGTAGCCTAACGGCCACCGG	1	1	empirical	SENP1_-_48499385.23-P1P2	GATCACTCGGGTCTCAAGGA	2	7	empirical	SENP1_-_48499614.23-P1P2|SENP1_-_48499385.23-P1P2
WFDC9	P1P2	nonessential	WFDC9_+_44259897.23-P1P2	GCCAGGACGCAAGACAAGTG	1	1	predicted	WFDC9_+_44259887.23-P1P2	GAGACAAGTGGGGCATCTGT	2	2	predicted	WFDC9_+_44259897.23-P1P2|WFDC9_+_44259887.23-P1P2
SLC30A7	P1P2	nonessential	SLC30A7_-_101361698.23-P1P2	GGTCTGTCTGTGTCTCGCAG	1	1	predicted	SLC30A7_-_101361665.23-P1P2	GCGGAAGTAAGCGAATTCCC	2	2	predicted	SLC30A7_-_101361698.23-P1P2|SLC30A7_-_101361665.23-P1P2
ATF5	P1P2	essential	ATF5_+_50432696.23-P1P2	GAGGGCCACGAGCTGCGAAA	1	7	essential	ATF5_+_50432424.23-P1P2	GACTGGGGACAGATATATAC	2	1	essential	ATF5_+_50432696.23-P1P2|ATF5_+_50432424.23-P1P2
CLEC2D	P1P2	nonessential	CLEC2D_-_9822325.23-P1P2	GGATCACTCATAGAAACTGG	1	1	predicted	CLEC2D_+_9822386.23-P1P2	GAGAGCCCAGCTTCTTACCT	2	2	predicted	CLEC2D_-_9822325.23-P1P2|CLEC2D_+_9822386.23-P1P2
PADI2	P1P2	nonessential	PADI2_+_17445874.23-P1P2	GCCAGCGAGCGCGGGCACTG	1	1	predicted	PADI2_-_17445679.23-P1P2	GTCGGGATGAGGGACAACTC	2	2	predicted	PADI2_+_17445874.23-P1P2|PADI2_-_17445679.23-P1P2
ASS1	P1P2	nonessential	ASS1_-_133320387.23-P1P2	GCCGCTGCCCGAGCCCGGTA	1	1	predicted	ASS1_+_133320409.23-P1P2	GGTGCTCTCGGCTAGGGAGT	2	2	predicted	ASS1_-_133320387.23-P1P2|ASS1_+_133320409.23-P1P2
KRT7	P1P2	nonessential	KRT7_+_52627099.23-P1P2	GGAGCGCGAGGTGAATACCG	1	1	predicted	KRT7_+_52627123.23-P1P2	GGCGCCGCGGCCCGAGAAGG	2	2	predicted	KRT7_+_52627099.23-P1P2|KRT7_+_52627123.23-P1P2
LGMN	P1P2	nonessential	LGMN_-_93214924.23-P1P2	GgGACCGTGAGAACTCGCGG	1	1	predicted	LGMN_-_93214921.23-P1P2	GgcggGACCGTGAGAACTCG	2	2	predicted	LGMN_-_93214924.23-P1P2|LGMN_-_93214921.23-P1P2
SETD5	P1P2	significant	SETD5_-_9439569.23-P1P2	GTCCCGGCCAGGAAACGCCG	1	8	empirical	SETD5_+_9439604.23-P1P2	GTGCGGCGCACGGCACTCCC	2	9	empirical	SETD5_-_9439569.23-P1P2|SETD5_+_9439604.23-P1P2
HPCAL1	P1P2	nonessential	HPCAL1_-_10443062.23-P1P2	GgcggcggcgggcAGCGGAC	1	1	predicted	HPCAL1_-_10443073.23-P1P2	GcAGCGGACGGGCGGACTGA	2	2	predicted	HPCAL1_-_10443062.23-P1P2|HPCAL1_-_10443073.23-P1P2
RPAP2	P1P2	essential	RPAP2_-_92764613.23-P1P2	GGCCGGAGCGTGTCCCCGTC	1	6	essential	RPAP2_+_92764606.23-P1P2	GGGGAGAGTAGTCTGCCGGA	2	1	essential	RPAP2_-_92764613.23-P1P2|RPAP2_+_92764606.23-P1P2
KRT82	P1P2	nonessential	KRT82_-_52800109.23-P1P2	GGCCCTGGAGGAAAGAACCG	1	1	predicted	KRT82_-_52800062.23-P1P2	GTGGAAAGAGTGGTACGACA	2	2	predicted	KRT82_-_52800109.23-P1P2|KRT82_-_52800062.23-P1P2
SCGB1C1	P1P2	nonessential	SCGB1C1_+_193152.23-P1P2	GCCCCAGTGGCACAGACTCA	1	1	predicted	SCGB1C1_+_193136.23-P1P2	GTCACGGCAGATGCAGAACA	2	2	predicted	SCGB1C1_+_193152.23-P1P2|SCGB1C1_+_193136.23-P1P2
PEX6	P1P2	significant	PEX6_-_42946918.23-P1P2	GACACCAACGAGGAGGGTGA	1	5	empirical	PEX6_-_42946912.23-P1P2	GGACAGGACACCAACGAGGA	2	1	empirical	PEX6_-_42946918.23-P1P2|PEX6_-_42946912.23-P1P2
CSNK1E	P1P2	nonessential	CSNK1E_+_38713240.23-P1P2	GGGCGGCTCCGCGAATCCTC	1	1	predicted	CSNK1E_-_38712904.23-P1P2	GCCTCGGAGGGCCCAGCGGG	2	2	predicted	CSNK1E_+_38713240.23-P1P2|CSNK1E_-_38712904.23-P1P2
C19orf82	P1P2	nonessential	C19orf82_-_9732247.23-P1P2	GGGATGGGACGCATCCCCGG	1	1	predicted	C19orf82_+_9732256.23-P1P2	GgctcgcccGATAAAAGCTT	2	2	predicted	C19orf82_-_9732247.23-P1P2|C19orf82_+_9732256.23-P1P2
ZBTB11	P1P2	nonessential	ZBTB11_-_101395936.23-P1P2	GCGGGCGAGTTGGTAACCAG	1	1	predicted	ZBTB11_+_101395930.23-P1P2	GGGAGAAGTGCAGTTCCCCC	2	2	predicted	ZBTB11_-_101395936.23-P1P2|ZBTB11_+_101395930.23-P1P2
PAFAH1B1	P1P2	significant	PAFAH1B1_-_2497388.23-P1P2	GACCCGGCGGCCTGACGATG	1	4	empirical	PAFAH1B1_-_2497281.23-P1P2	GGACGGAAGAGGCCCTGCGG	2	1	empirical	PAFAH1B1_-_2497388.23-P1P2|PAFAH1B1_-_2497281.23-P1P2
HIST1H4A	ENST00000359907.3	significant	HIST1H4A_-_26021934.23-ENST00000359907.3	GGACGTGGTAAGGGCGGGAA	1	1	empirical	HIST1H4A_-_26021831.23-ENST00000359907.3	GTCAGTGTCCGCTGGAGGTG	2	2	predicted	HIST1H4A_-_26021934.23-ENST00000359907.3|HIST1H4A_-_26021831.23-ENST00000359907.3
PDLIM2	P2	nonessential	PDLIM2_-_22436657.23-P2	GCTCCCCAGAGTCGGGTAGA	1	1	predicted	PDLIM2_-_22436722.23-P2	GCCTGGGCGCCCAGCCGGAC	2	2	predicted	PDLIM2_-_22436657.23-P2|PDLIM2_-_22436722.23-P2
MCAT	P1P2	significant	MCAT_+_43539332.23-P1P2	GATGAGCGTCCGGGTCGCAC	1	4	empirical	MCAT_+_43539323.23-P1P2	GCGGGTCGCACGGGTAGCGT	2	1	empirical	MCAT_+_43539332.23-P1P2|MCAT_+_43539323.23-P1P2
S1PR4	P1P2	nonessential	S1PR4_-_3178814.23-P1P2	GAACGCCACGGGGACCCCGG	1	1	predicted	S1PR4_+_3178815.23-P1P2	GAGCTGTTGGCAGGACTCGG	2	2	predicted	S1PR4_-_3178814.23-P1P2|S1PR4_+_3178815.23-P1P2
RCAN1	P1P2	nonessential	RCAN1_+_35899092.23-P1P2	GTTGGAAAGGAATCTCACTA	1	1	predicted	RCAN1_+_35899077.23-P1P2	GACTAGGGGCTTGACTGCGT	2	2	predicted	RCAN1_+_35899092.23-P1P2|RCAN1_+_35899077.23-P1P2
SRSF12	P1P2	nonessential	SRSF12_+_89827678.23-P1P2	GGCCGGCGGAGCTCCTGTGG	1	1	predicted	SRSF12_-_89827687.23-P1P2	GCTACCGCTGCTACCACCAC	2	2	predicted	SRSF12_+_89827678.23-P1P2|SRSF12_-_89827687.23-P1P2
TLR6	P1P2	nonessential	TLR6_+_38858380.23-P1P2	GTCTTCTGAAAAAGAGATCT	1	1	predicted	TLR6_-_38858023.23-P1P2	GTAAATAGGTGCCATATCAG	2	2	predicted	TLR6_+_38858380.23-P1P2|TLR6_-_38858023.23-P1P2
TEF	P1	significant	TEF_+_41777992.23-P1	GCCCGCCCGCCCCCCGAGAT	1	5	empirical	TEF_-_41777985.23-P1	GGCAGCTGCAGCGGGTCGCA	2	3	empirical	TEF_+_41777992.23-P1|TEF_-_41777985.23-P1
DOCK9	P1P2	nonessential	DOCK9_-_99630253.23-P1P2	GCAGGCATGCCAGTGGTCCA	1	1	predicted	DOCK9_-_99630257.23-P1P2	GCATGCCAGTGGTCCAAGGA	2	2	predicted	DOCK9_-_99630253.23-P1P2|DOCK9_-_99630257.23-P1P2
KLHDC7B	P1P2	nonessential	KLHDC7B_+_50986119.23-P1P2	Ggagctgggggatgaagcca	1	1	predicted	KLHDC7B_+_50986017.23-P1P2	GTCGCCCACGGAAGGATCCT	2	2	predicted	KLHDC7B_+_50986119.23-P1P2|KLHDC7B_+_50986017.23-P1P2
NKG7	P1P2	nonessential	NKG7_-_51875938.23-P1P2	GCAAGCAGTTGGGGCAGTGA	1	1	predicted	NKG7_-_51875475.23-P1P2	GGCCTGGGGGGAACAGTGAG	2	2	predicted	NKG7_-_51875938.23-P1P2|NKG7_-_51875475.23-P1P2
KHDRBS2	P1P2	nonessential	KHDRBS2_+_62996055.23-P1P2	GCGAGCGAGGGACGACGGAA	1	1	predicted	KHDRBS2_+_62996060.23-P1P2	GCTGCGCGAGCGAGGGACGA	2	2	predicted	KHDRBS2_+_62996055.23-P1P2|KHDRBS2_+_62996060.23-P1P2
DDX55	P1P2	significant	DDX55_+_124086731.23-P1P2	GCCTGCGGGTGCAGCGGCAC	1	7	empirical	DDX55_-_124086680.23-P1P2	GCGAGCAGCGGCGACCGACG	2	4	empirical	DDX55_+_124086731.23-P1P2|DDX55_-_124086680.23-P1P2
TRMT2A	P1P2	nonessential	TRMT2A_+_20104702.23-P1P2	GCGCGCTGGCGGACTAAGAG	1	1	predicted	TRMT2A_-_20104506.23-P1P2	GCGTCCTGGGCCTGTCACAA	2	2	predicted	TRMT2A_+_20104702.23-P1P2|TRMT2A_-_20104506.23-P1P2
C11orf58	P1P2	nonessential	C11orf58_-_16760191.23-P1P2	GGCCGCAACGGTGACGACTG	1	1	predicted	C11orf58_-_16760208.23-P1P2	GTGTGGCAGAGAAGGCCCGG	2	2	predicted	C11orf58_-_16760191.23-P1P2|C11orf58_-_16760208.23-P1P2
NRBP1	P1P2	significant	NRBP1_-_27651525.23-P1P2	GCTGCGGAGCGCAGCTGTGA	1	2	empirical	NRBP1_-_27651543.23-P1P2	GAGGGAGTCGCTGTGATCCG	2	1	empirical	NRBP1_-_27651525.23-P1P2|NRBP1_-_27651543.23-P1P2
OMG	P1P2	nonessential	OMG_-_29624246.23-P1P2	GTCGTCTTGTTCTGTAGAGT	1	1	predicted	OMG_-_29624224.23-P1P2	GTTTTCTCTGGGAAACTTAA	2	2	predicted	OMG_-_29624246.23-P1P2|OMG_-_29624224.23-P1P2
OR2T35	ENST00000317450.3	nonessential	OR2T35_-_248802101.23-ENST00000317450.3	GGTCAGCATGAACCCATCCA	1	1	predicted	OR2T35_-_248802530.23-ENST00000317450.3	GCCTGTGAGGACGAAGTTAG	2	2	predicted	OR2T35_-_248802101.23-ENST00000317450.3|OR2T35_-_248802530.23-ENST00000317450.3
HHIP	P1P2	nonessential	HHIP_+_145567410.23-P1P2	GACAGTAGCAGGAACAGAAA	1	1	predicted	HHIP_+_145567349.23-P1P2	GTGGGCTCTAGATGATGCTG	2	2	predicted	HHIP_+_145567410.23-P1P2|HHIP_+_145567349.23-P1P2
PRKCI	P1P2	nonessential	PRKCI_-_169940251.23-P1P2	GGCCCGGGCGGCTGTAGAGG	1	1	predicted	PRKCI_-_169940398.23-P1P2	GCAGGCGGCGGAGTCCCCCA	2	2	predicted	PRKCI_-_169940251.23-P1P2|PRKCI_-_169940398.23-P1P2
2022-09-03	P1P2	nonessential	SEPT3_-_42372842.23-P1P2	GcaacggTGCGCGCGGACAg	1	1	predicted	SEPT3_-_42372845.23-P1P2	GcggTGCGCGCGGACAgggg	2	2	predicted	SEPT3_-_42372842.23-P1P2|SEPT3_-_42372845.23-P1P2
GABRB2	P1P2	nonessential	GABRB2_+_160973696.23-P1P2	GTGCACTGGGCAGACTAAGT	1	1	predicted	GABRB2_-_160973604.23-P1P2	GGACAGCGGCGATTATTAAG	2	2	predicted	GABRB2_+_160973696.23-P1P2|GABRB2_-_160973604.23-P1P2
OAT	P1P2	nonessential	OAT_+_126107429.23-P1P2	GGCGCTGTCAGGTACCGTCT	1	1	predicted	OAT_-_126107437.23-P1P2	GCAGGACAGCGGCGCCCAGA	2	2	predicted	OAT_+_126107429.23-P1P2|OAT_-_126107437.23-P1P2
POU2F3	P2	nonessential	POU2F3_-_120110914.23-P2	GGCGGAGCGCgcgacagtgg	1	1	predicted	POU2F3_-_120110926.23-P2	Gacagtggcggcgacggctc	2	2	predicted	POU2F3_-_120110914.23-P2|POU2F3_-_120110926.23-P2
RWDD2B	P1P2	nonessential	RWDD2B_+_30391650.23-P1P2	GTCCGGTAGGTCGCCAGCTG	1	1	predicted	RWDD2B_-_30391670.23-P1P2	GGCCTCAGCTGGCGACCTAC	2	2	predicted	RWDD2B_+_30391650.23-P1P2|RWDD2B_-_30391670.23-P1P2
TAS2R42	ENST00000334266.1	nonessential	TAS2R42_+_11339527.23-ENST00000334266.1	GCTGGAGATGGCCACCGAAT	1	1	predicted	TAS2R42_+_11339474.23-ENST00000334266.1	GATTCATCATCAGCATGCTG	2	2	predicted	TAS2R42_+_11339527.23-ENST00000334266.1|TAS2R42_+_11339474.23-ENST00000334266.1
HINT2	P1P2	significant	HINT2_+_35814857.23-P1P2	GGAGCGAGTAGGGGGTCCTG	1	1	empirical	HINT2_+_35815002.23-P1P2	GCGGAGCCGAGTGCTGACCC	2	3	empirical	HINT2_+_35814857.23-P1P2|HINT2_+_35815002.23-P1P2
CDH4	P1P2	nonessential	CDH4_-_59827320.23-P1P2	GCTCCGAGCGCGCGGAACAG	1	1	predicted	CDH4_-_59827325.23-P1P2	GAGCGCGCGGAACAGAGGCG	2	2	predicted	CDH4_-_59827320.23-P1P2|CDH4_-_59827325.23-P1P2
TRIM71	P1P2	significant	TRIM71_+_32859899.23-P1P2	GTAAGCAGGAAGGCGGACGA	1	8	empirical	TRIM71_+_32859550.23-P1P2	GTTGCAACCCAGCCCGGAGG	2	2	empirical	TRIM71_+_32859899.23-P1P2|TRIM71_+_32859550.23-P1P2
RNF144B	P1P2	nonessential	RNF144B_-_18387752.23-P1P2	GGCAGAGCACGGAGGAAAGA	1	1	predicted	RNF144B_-_18387744.23-P1P2	GTGTCAGCCGCAGAGCACGG	2	2	predicted	RNF144B_-_18387752.23-P1P2|RNF144B_-_18387744.23-P1P2
G2E3	P1P2	nonessential	G2E3_-_31028342.23-P1P2	GCGGGGCCGACCGCTCTTTC	1	1	predicted	G2E3_+_31028312.23-P1P2	GGCGGTCGGCCCCGCCCTCG	2	2	predicted	G2E3_-_31028342.23-P1P2|G2E3_+_31028312.23-P1P2
MBOAT1	P1P2	nonessential	MBOAT1_-_20212648.23-P1P2	GCTCGAGGCGCAAACTCTCG	1	1	predicted	MBOAT1_-_20212633.23-P1P2	GGAACCGGCGCAAACTCTCG	2	2	predicted	MBOAT1_-_20212648.23-P1P2|MBOAT1_-_20212633.23-P1P2
LDB1	P1	significant	LDB1_-_103880082.23-P1	GAGCCAGGCAGGAAGGCGAG	1	1	predicted	LDB1_+_103880112.23-P1	GcacacggacacacacTCCG	2	2	predicted	LDB1_-_103880082.23-P1|LDB1_+_103880112.23-P1
MFN2	P2	significant	MFN2_-_12042038.23-P2	GTCTAATAAGTCAGGACTGG	1	1	predicted	MFN2_+_12042061.23-P2	GTCCTGTCTCAGGTTGAGGT	2	2	predicted	MFN2_-_12042038.23-P2|MFN2_+_12042061.23-P2
APOO	P1P2	nonessential	APOO_-_23925881.23-P1P2	GGGCCACGCCCACTATAGAG	1	1	predicted	APOO_-_23925835.23-P1P2	GAACATGTCGCTGGCAGCGG	2	2	predicted	APOO_-_23925881.23-P1P2|APOO_-_23925835.23-P1P2
SRPX	P1P2	nonessential	SRPX_-_38080094.23-P1P2	GAGCGCAGCGCGCTTCCCGG	1	1	predicted	SRPX_-_38079891.23-P1P2	GCCCGAGCGAAGGGTCCCAA	2	2	predicted	SRPX_-_38080094.23-P1P2|SRPX_-_38079891.23-P1P2
SSPO	P1P2	significant	SSPO_+_149519432.23-P1P2	GCCCCGAGGGAAGAGATGGT	1	2	empirical	SSPO_+_149519445.23-P1P2	GCCTACAAGGAGGGCCCCGA	2	6	empirical	SSPO_+_149519432.23-P1P2|SSPO_+_149519445.23-P1P2
MYEF2	P1P2	nonessential	MYEF2_-_48470496.23-P1P2	GGCTCCGAGCGCGACAATGG	1	1	predicted	MYEF2_-_48470493.23-P1P2	GGGGGCTCCGAGCGCGACAA	2	2	predicted	MYEF2_-_48470496.23-P1P2|MYEF2_-_48470493.23-P1P2
PTGES2	P1P2	nonessential	PTGES2_+_130889986.23-P1P2	GggcggAGCGAACATGGACC	1	1	predicted	PTGES2_-_130889959.23-P1P2	GAGGCCAAGGCGCACCCACC	2	2	predicted	PTGES2_+_130889986.23-P1P2|PTGES2_-_130889959.23-P1P2
RBM4B	P1P2	nonessential	RBM4B_+_66445296.23-P1P2	GGGTCGCGTCCAGGCTCGAG	1	1	predicted	RBM4B_-_66445243.23-P1P2	GACCCCCTCGCACCTCCGGG	2	2	predicted	RBM4B_+_66445296.23-P1P2|RBM4B_-_66445243.23-P1P2
C6orf52	P1P2	nonessential	C6orf52_+_10694774.23-P1P2	GGGCTGTGTACTAGTAGGGT	1	1	predicted	C6orf52_+_10694794.23-P1P2	GCGGCAGCGTGCATTGTTGT	2	2	predicted	C6orf52_+_10694774.23-P1P2|C6orf52_+_10694794.23-P1P2
B3GNT8	P1P2	nonessential	B3GNT8_-_41933860.23-P1P2	Ggagcagagagaggagaact	2	2	predicted	B3GNT8_-_41933876.23-P1P2	Gactggggtgagacaggcga	3	3	predicted	B3GNT8_-_41933860.23-P1P2|B3GNT8_-_41933876.23-P1P2
GALNTL5	P1P2	nonessential	GALNTL5_+_151653560.23-P1P2	GTAGCTAGCAGGCTTTATGG	1	1	predicted	GALNTL5_-_151653541.23-P1P2	GCCCGCAACCCAGCACAACC	2	2	predicted	GALNTL5_+_151653560.23-P1P2|GALNTL5_-_151653541.23-P1P2
GATAD2A	P1	significant	GATAD2A_+_19516609.23-P1	GCGCCCCTCGGCCGCACACA	1	8	empirical	GATAD2A_+_19517008.23-P1	GCGGGGCAAGGAACTTTCCA	2	5	empirical	GATAD2A_+_19516609.23-P1|GATAD2A_+_19517008.23-P1
WNT9A	P1P2	nonessential	WNT9A_+_228135576.23-P1P2	GGCGCGGCAAGATGCTGGAT	1	1	predicted	WNT9A_+_228135606.23-P1P2	GGAGCTGGGAGCGCGATGGT	2	2	predicted	WNT9A_+_228135576.23-P1P2|WNT9A_+_228135606.23-P1P2
COG8	P1P2	essential	COG8_+_69373427.23-P1P2	GACCGCGGCGACTATCCCAT	1	1	essential	COG8_-_69373434.23-P1P2	GTGTGGCCGTGGCTACCGAT	2	2	essential	COG8_+_69373427.23-P1P2|COG8_-_69373434.23-P1P2
BLOC1S3	P1	nonessential	BLOC1S3_-_45682058.23-P1	GCAGCACTCGGGTTAGGAAG	1	1	predicted	BLOC1S3_-_45682052.23-P1	GAGAACGCAGCACTCGGGTT	2	2	predicted	BLOC1S3_-_45682058.23-P1|BLOC1S3_-_45682052.23-P1
SPHAR	P1P2	nonessential	SPHAR_-_229439698.23-P1P2	GTTCTGCAAGCCAGTCAAAG	1	1	predicted	SPHAR_+_229439686.23-P1P2	GTTTGCTGTGCCACTTTGAC	2	2	predicted	SPHAR_-_229439698.23-P1P2|SPHAR_+_229439686.23-P1P2
FCGR2B	ENST00000403078.3	nonessential	FCGR2B_+_161551147.23-ENST00000403078.3	GTGGCGGATTCTACCCTAGA	1	1	predicted	FCGR2B_-_161551374.23-ENST00000403078.3	GCCAGGAGGGAGAGAGGAAC	2	2	predicted	FCGR2B_+_161551147.23-ENST00000403078.3|FCGR2B_-_161551374.23-ENST00000403078.3
ST3GAL1	P1P2	nonessential	ST3GAL1_-_134584001.23-P1P2	GGGTTCGGAGGAGAATACAG	1	1	predicted	ST3GAL1_-_134584175.23-P1P2	GGGCTGGAGCCGAGGAAGCG	2	2	predicted	ST3GAL1_-_134584001.23-P1P2|ST3GAL1_-_134584175.23-P1P2
DHRS9	P1P2	nonessential	DHRS9_-_169926096.23-P1P2	GCAGAGCTCTACGGAAACCC	1	1	predicted	DHRS9_-_169926114.23-P1P2	GCAGGCACCTCGACCTCAAG	2	2	predicted	DHRS9_-_169926096.23-P1P2|DHRS9_-_169926114.23-P1P2
ZNF607	P1P2	nonessential	ZNF607_+_38210582.23-P1P2	GTCGCTGCCGTATTTCTCGT	1	1	predicted	ZNF607_+_38210629.23-P1P2	GGAAGTCTCCGGGGCTCGAG	2	2	predicted	ZNF607_+_38210582.23-P1P2|ZNF607_+_38210629.23-P1P2
ZNF736	P2	nonessential	ZNF736_-_63767882.23-P2	GCTCCCAGGATGTACGGTGA	1	1	predicted	ZNF736_+_63767885.23-P2	GAGAGGGGCGGAGTCCAAAC	2	2	predicted	ZNF736_-_63767882.23-P2|ZNF736_+_63767885.23-P2
GRIK4	P1P2	nonessential	GRIK4_+_120382491.23-P1P2	GTCTTCCGCAGCAGCCGTGG	1	1	predicted	GRIK4_-_120382484.23-P1P2	GCTTCAGCTGCGGGCGGATC	2	2	predicted	GRIK4_+_120382491.23-P1P2|GRIK4_-_120382484.23-P1P2
RAD51AP1	P1P2	nonessential	RAD51AP1_+_4648103.23-P1P2	GCACCTCACAGGCCGCACCA	1	1	predicted	RAD51AP1_+_4648268.23-P1P2	GGATACTTCTGAGCAACGGG	2	2	predicted	RAD51AP1_+_4648103.23-P1P2|RAD51AP1_+_4648268.23-P1P2
AMPH	P1P2	nonessential	AMPH_+_38670931.23-P1P2	GCCATGGCCGACATCAAGAC	1	1	predicted	AMPH_-_38670993.23-P1P2	GCGAAGAGCAGAGCGCGCAG	2	2	predicted	AMPH_+_38670931.23-P1P2|AMPH_-_38670993.23-P1P2
ABCC3	P1P2	significant	ABCC3_+_48712270.23-P1P2	GCGAGGCGCGGCTGCAAGGA	1	2	empirical	ABCC3_+_48712248.23-P1P2	GCGAGCGCGGTCGGACCCAG	1	1	predicted	ABCC3_+_48712270.23-P1P2|ABCC3_+_48712248.23-P1P2
CDX2	P1P2	significant	CDX2_-_28543416.23-P1P2	GGGGAAGACCCGCCACAGGC	1	8	empirical	CDX2_-_28543397.23-P1P2	GccACTAGGCTGCAGAGGCG	2	4	empirical	CDX2_-_28543416.23-P1P2|CDX2_-_28543397.23-P1P2
CXCL1	P1P2	nonessential	CXCL1_+_74735147.23-P1P2	GCTGGCGGCTGTGAGAGGAG	1	1	predicted	CXCL1_+_74735130.23-P1P2	GAGCGGAAGAGCTGGCGAGG	2	2	predicted	CXCL1_+_74735147.23-P1P2|CXCL1_+_74735130.23-P1P2
DEFB121	P1P2	nonessential	DEFB121_-_29994012.23-P1P2	GCAACTGGTAAAACAGACAG	1	1	predicted	DEFB121_-_29994025.23-P1P2	GAGACAGAGGACTCCATTCT	2	2	predicted	DEFB121_-_29994012.23-P1P2|DEFB121_-_29994025.23-P1P2
NDUFAF1	P1P2	significant	NDUFAF1_+_41694653.23-P1P2	GTGGGCGGAAGGTACACTAT	1	3	empirical	NDUFAF1_+_41694668.23-P1P2	GGGGTAAAGTGGCTTCTGGG	2	5	empirical	NDUFAF1_+_41694653.23-P1P2|NDUFAF1_+_41694668.23-P1P2
ZNF235	P1P2	nonessential	ZNF235_+_44809125.23-P1P2	GGGATCTGAGATATCTCCCA	1	1	predicted	ZNF235_+_44809145.23-P1P2	GCGCTCCAGGAAGGCGAGGT	2	2	predicted	ZNF235_+_44809125.23-P1P2|ZNF235_+_44809145.23-P1P2
GOSR1	P1P2	significant	GOSR1_-_28804478.23-P1P2	GGCAGGGACCAGCAGTTACT	1	2	empirical	GOSR1_-_28804457.23-P1P2	GCGTTGGACGACAAAGATGG	2	1	empirical	GOSR1_-_28804478.23-P1P2|GOSR1_-_28804457.23-P1P2
VSTM5	P1P2	significant	VSTM5_-_93583478.23-P1P2	GGCCCTCAGCCGGACAAGGT	1	2	empirical	VSTM5_+_93583373.23-P1P2	GGACCCGGCGCCGACCGTAG	2	10	empirical	VSTM5_-_93583478.23-P1P2|VSTM5_+_93583373.23-P1P2
ARFGEF1	P1P2	significant	ARFGEF1_+_68255970.23-P1P2	GGGCAGGTCGGCGGTGATGG	1	2	empirical	ARFGEF1_+_68255550.23-P1P2	GGCCGCTGGGAGCCGCGGGT	2	4	empirical	ARFGEF1_+_68255970.23-P1P2|ARFGEF1_+_68255550.23-P1P2
PRPH	P1P2	nonessential	PRPH_+_49688994.23-P1P2	GGCCGGCCCGGAGGCCCGAC	1	1	predicted	PRPH_+_49688967.23-P1P2	GGCTCATTGCGGCCAAGGAT	2	2	predicted	PRPH_+_49688994.23-P1P2|PRPH_+_49688967.23-P1P2
SOD2	P1P2	significant	SOD2_+_160114265.23-P1P2	GGGCgcaggagcggcactcg	1	1	empirical	SOD2_+_160114227.23-P1P2	Gagcggcttcagcagatcgg	2	3	empirical	SOD2_+_160114265.23-P1P2|SOD2_+_160114227.23-P1P2
PRMT10	P1P2	significant	PRMT10_-_148605268.23-P1P2	GGCAAAGTTACCCTCCGCCG	1	3	empirical	PRMT10_+_148605263.23-P1P2	GGGGTTGGCGAGTTCACCCG	2	1	empirical	PRMT10_-_148605268.23-P1P2|PRMT10_+_148605263.23-P1P2
ZNF644	P1P2	significant	ZNF644_-_91486991.23-P1P2	GCAGCCTCAACGAGAGGGGT	1	2	empirical	ZNF644_+_91487345.23-P1P2	GGCCGCACAGGCTAAGATGG	2	8	empirical	ZNF644_-_91486991.23-P1P2|ZNF644_+_91487345.23-P1P2
PDGFA	P1P2	nonessential	PDGFA_-_558955.23-P1P2	GTTCTTCCTCGGTGCGTTCC	1	1	predicted	PDGFA_-_558817.23-P1P2	GGCGAGCAGTGAGTGCGGAG	2	2	predicted	PDGFA_-_558955.23-P1P2|PDGFA_-_558817.23-P1P2
LYRM4	P1P2	nonessential	LYRM4_-_5260892.23-P1P2	GCTGGGTCACCTGTAATTGT	1	1	predicted	LYRM4_+_5260749.23-P1P2	GGCGGCTGCGAGGCAAGGAC	2	2	predicted	LYRM4_-_5260892.23-P1P2|LYRM4_+_5260749.23-P1P2
ZFHX2	P2	nonessential	ZFHX2_+_24025076.23-P2	GCTGAACTGGGGCTACAAGG	1	1	predicted	ZFHX2_-_24025118.23-P2	GGCTTTAGGTAGAGTACCGC	2	2	predicted	ZFHX2_+_24025076.23-P2|ZFHX2_-_24025118.23-P2
TOM1	P1P2	significant	TOM1_+_35695890.23-P1P2	GCGCCGCTGCCACCAACCCC	1	2	empirical	TOM1_-_35695895.23-P1P2	GTTGCTGTCAGCTGATTCCC	1	1	predicted	TOM1_+_35695890.23-P1P2|TOM1_-_35695895.23-P1P2
CPLX3	P1P2	nonessential	CPLX3_+_75118992.23-P1P2	GGCTACCACGCGCCAGGCAC	1	1	predicted	CPLX3_-_75119047.23-P1P2	GCCCCGGCCGGCGAAGACCA	2	2	predicted	CPLX3_+_75118992.23-P1P2|CPLX3_-_75119047.23-P1P2
DPRX	ENST00000376650.1	nonessential	DPRX_+_54135322.23-ENST00000376650.1	GGCGCCTGGGTTCAGGTCCA	1	1	predicted	DPRX_-_54135340.23-ENST00000376650.1	GTATCCCTGGACCTGAACCC	2	2	predicted	DPRX_+_54135322.23-ENST00000376650.1|DPRX_-_54135340.23-ENST00000376650.1
ARHGDIA	P1P2	significant	ARHGDIA_+_79829172.23-P1P2	GACCGCGCGGCCGAACCCTC	1	2	empirical	ARHGDIA_+_79829165.23-P1P2	GGGCCGAACCCTCCGGTGAG	2	7	empirical	ARHGDIA_+_79829172.23-P1P2|ARHGDIA_+_79829165.23-P1P2
WNT9B	P2	significant	WNT9B_+_44910629.23-P2	GTGGAAGGAGCCATCACCCA	1	1	predicted	WNT9B_+_44910648.23-P2	GAGTGGGACGTTAGAACTTG	2	2	predicted	WNT9B_+_44910629.23-P2|WNT9B_+_44910648.23-P2
PSMD14	P1P2	significant	PSMD14_+_162165011.23-P1P2	GCAGCGGCGCACACCCGACG	1	3	empirical	PSMD14_+_162165252.23-P1P2	GGAGCAGGCGAAGAGAATGA	2	7	empirical	PSMD14_+_162165011.23-P1P2|PSMD14_+_162165252.23-P1P2
ACSBG2	P1P2	nonessential	ACSBG2_-_6135704.23-P1P2	GGGTAGAAGGCCTGTTGTGG	1	1	predicted	ACSBG2_-_6135684.23-P1P2	GCGTTCTGGAAGGTTGAATG	2	2	predicted	ACSBG2_-_6135704.23-P1P2|ACSBG2_-_6135684.23-P1P2
RORB	P1P2	significant	RORB_+_77112281.23-P1P2	GTGTTCAGTTACagggagga	1	1	predicted	RORB_-_77112334.23-P1P2	GACATTGTGGATCCGCTAAC	2	2	predicted	RORB_+_77112281.23-P1P2|RORB_-_77112334.23-P1P2
C5orf49	P1P2	nonessential	C5orf49_+_7851190.23-P1P2	GAGGCCTGCAGACTCCGACT	1	1	predicted	C5orf49_+_7850804.23-P1P2	GCCTCGGAGGGAGGGCGTAG	2	2	predicted	C5orf49_+_7851190.23-P1P2|C5orf49_+_7850804.23-P1P2
ACTL6A	P1P2	significant	ACTL6A_-_179280784.23-P1P2	GGGGTGGCGGTGGAAGTTAA	1	5	empirical	ACTL6A_+_179280755.23-P1P2	GTTCCACCGCCACCCACCTC	2	4	empirical	ACTL6A_-_179280784.23-P1P2|ACTL6A_+_179280755.23-P1P2
SH3KBP1	P1P2	significant	SH3KBP1_+_19905303.23-P1P2	GGTCCGGACGGGGGACACCG	1	10	empirical	SH3KBP1_+_19905629.23-P1P2	Gagcagcaggagtcgccccg	1	1	predicted	SH3KBP1_+_19905303.23-P1P2|SH3KBP1_+_19905629.23-P1P2
SLC25A31	P1P2	nonessential	SLC25A31_+_128651635.23-P1P2	GGTACGGGAGCTACGATGAA	1	1	predicted	SLC25A31_+_128651597.23-P1P2	GAACCGCTGCAGCATCGTAC	2	2	predicted	SLC25A31_+_128651635.23-P1P2|SLC25A31_+_128651597.23-P1P2
MATN2	P2	nonessential	MATN2_+_98900307.23-P2	GTTTTCAAGGCGAGCAAGAG	1	1	predicted	MATN2_+_98900363.23-P2	GGAGGAGGACGATCTGTCCG	2	2	predicted	MATN2_+_98900307.23-P2|MATN2_+_98900363.23-P2
HSF4	P1P2	significant	HSF4_+_67198863.23-P1P2	GGGAGGGACCCCGGGACCAC	1	2	empirical	HSF4_-_67197537.23-P1P2	GGAGGTGCGCGCAGCCGCTT	2	1	empirical	HSF4_+_67198863.23-P1P2|HSF4_-_67197537.23-P1P2
ATP5G3	P1P2	significant	ATP5G3_-_176046210.23-P1P2	GCCTCTCTGCGGAGGAAAAG	1	6	empirical	ATP5G3_-_176046158.23-P1P2	GCTGCGCGGCTGGAGATATT	2	9	empirical	ATP5G3_-_176046210.23-P1P2|ATP5G3_-_176046158.23-P1P2
CD79A	P1P2	nonessential	CD79A_-_42381384.23-P1P2	GACTGGGAGAAGATGCCTGG	1	1	predicted	CD79A_-_42381367.23-P1P2	GCTCAAACTAACCAACCCAC	2	2	predicted	CD79A_-_42381384.23-P1P2|CD79A_-_42381367.23-P1P2
SYCP1	P1P2	nonessential	SYCP1_+_115397462.23-P1P2	GCGGGCGGCTGGCAGTTCAA	1	1	predicted	SYCP1_+_115397487.23-P1P2	GTGAGCGGCCCGGAGCGCGT	2	2	predicted	SYCP1_+_115397462.23-P1P2|SYCP1_+_115397487.23-P1P2
FGD5	P1P2	nonessential	FGD5_-_14860822.23-P1P2	GAGGATGAACCCAAGGACGA	1	1	predicted	FGD5_-_14861023.23-P1P2	GCTCTTGAGGATGAAGGGGA	2	2	predicted	FGD5_-_14860822.23-P1P2|FGD5_-_14861023.23-P1P2
SAA4	P1P2	nonessential	SAA4_-_18258338.23-P1P2	GCTGGCCGTGGAGCTATAGT	1	1	predicted	SAA4_+_18258262.23-P1P2	GCATCTGGAGAAAGGTCCAC	2	2	predicted	SAA4_-_18258338.23-P1P2|SAA4_+_18258262.23-P1P2
CES1	P1P2	nonessential	CES1_-_55866971.23-P1P2	GAAGGCACGGAGCCACATCG	1	1	predicted	CES1_-_55866975.23-P1P2	GCACGGAGCCACATCGTGGA	2	2	predicted	CES1_-_55866971.23-P1P2|CES1_-_55866975.23-P1P2
FAM110B	P1P2	nonessential	FAM110B_+_58907076.23-P1P2	GAGGCTTCGCCGGAGAGTGA	1	1	predicted	FAM110B_-_58907117.23-P1P2	GCTGCCTGAGCCCTCCCACT	2	2	predicted	FAM110B_+_58907076.23-P1P2|FAM110B_-_58907117.23-P1P2
SPDYE2B	ENST00000455020.2	nonessential	SPDYE2B_-_102295712.23-ENST00000455020.2	GTCCTGTTCTTTCCAAAAAC	1	1	predicted	SPDYE2B_+_102295702.23-ENST00000455020.2	GATTGGAAGTTTCCTGTTTT	2	2	predicted	SPDYE2B_-_102295712.23-ENST00000455020.2|SPDYE2B_+_102295702.23-ENST00000455020.2
C17orf104	P1P2	nonessential	C17orf104_+_42733824.23-P1P2	GGGAGCCAGTGTGCGGGTAA	1	1	predicted	C17orf104_-_42733841.23-P1P2	GACTTCCCTTACCCGCACAC	2	2	predicted	C17orf104_+_42733824.23-P1P2|C17orf104_-_42733841.23-P1P2
MLIP	P1P2	nonessential	MLIP_+_53883981.23-P1P2	GCAGCAAAACATGGAAACAG	1	1	predicted	MLIP_-_53883889.23-P1P2	GAATTTAGAGGAGAAACTGA	2	2	predicted	MLIP_+_53883981.23-P1P2|MLIP_-_53883889.23-P1P2
ZNF853	P1	nonessential	ZNF853_-_6661611.23-P1	GGCTCATGCCGGTGGACCTG	1	1	predicted	ZNF853_-_6661603.23-P1	GGAGCTGGAGCTCATGCCGG	2	2	predicted	ZNF853_-_6661611.23-P1|ZNF853_-_6661603.23-P1
KDM2B	ENST00000377071.4	nonessential	KDM2B_-_122018913.23-ENST00000377071.4	GCTCCCGGCACTCAAAGATG	1	1	predicted	KDM2B_+_122018617.23-ENST00000377071.4	GGCAATGAGGGCAGGAACGG	2	2	predicted	KDM2B_-_122018913.23-ENST00000377071.4|KDM2B_+_122018617.23-ENST00000377071.4
PYDC2	ENST00000518817.1	nonessential	PYDC2_-_191179089.23-ENST00000518817.1	GCAGACCGTCCCCCAGACAG	1	1	predicted	PYDC2_+_191179051.23-ENST00000518817.1	GGTCTGTAGCTCCTTTCCCA	2	2	predicted	PYDC2_-_191179089.23-ENST00000518817.1|PYDC2_+_191179051.23-ENST00000518817.1
N6AMT1	P1P2	significant	N6AMT1_+_30257657.23-P1P2	GCAGCGAAGGACTATGGCAG	1	3	empirical	N6AMT1_-_30257642.23-P1P2	GGGCCCACGTGCCCGTGGAA	2	1	empirical	N6AMT1_+_30257657.23-P1P2|N6AMT1_-_30257642.23-P1P2
OR5M8	ENST00000327216.2	nonessential	OR5M8_+_56258824.23-ENST00000327216.2	GATGAGAAGAAACTGCACGT	1	1	predicted	OR5M8_-_56258807.23-ENST00000327216.2	GCCGGCGACTGGTCAGTCCC	2	2	predicted	OR5M8_+_56258824.23-ENST00000327216.2|OR5M8_-_56258807.23-ENST00000327216.2
PCDHGB5	P1P2	nonessential	PCDHGB5_+_140777604.23-P1P2	GGATTTTTGGATCTCCGAAC	1	1	predicted	PCDHGB5_-_140777612.23-P1P2	GACTGGAACTAAAGCCCGTT	2	2	predicted	PCDHGB5_+_140777604.23-P1P2|PCDHGB5_-_140777612.23-P1P2
KHDC3L	P1P2	nonessential	KHDC3L_-_74072640.23-P1P2	GCGGTGAGTGGACCAAGAAG	1	1	predicted	KHDC3L_+_74072509.23-P1P2	GGGTGACCGAGCACCTCCAC	2	2	predicted	KHDC3L_-_74072640.23-P1P2|KHDC3L_+_74072509.23-P1P2
PTPRF	P1P2	nonessential	PTPRF_-_43996596.23-P1P2	Ggaggcggcggctccagctt	1	1	predicted	PTPRF_+_43996747.23-P1P2	GTCACTCACCGCCTATCCAG	2	2	predicted	PTPRF_-_43996596.23-P1P2|PTPRF_+_43996747.23-P1P2
RNASE11	P1P2	nonessential	RNASE11_+_21056122.23-P1P2	GACCTAGAGCAGGCATGGGT	1	1	predicted	RNASE11_+_21056126.23-P1P2	GAGTGACCTAGAGCAGGCAT	2	2	predicted	RNASE11_+_21056122.23-P1P2|RNASE11_+_21056126.23-P1P2
SYNGAP1	P1P2	nonessential	SYNGAP1_+_33387855.23-P1P2	GTAAGAGCCAACGGCAGCAG	1	1	predicted	SYNGAP1_+_33387837.23-P1P2	GGCGGCAGCCgagagagagg	2	2	predicted	SYNGAP1_+_33387855.23-P1P2|SYNGAP1_+_33387837.23-P1P2
STARD6	ENST00000581310.1	nonessential	STARD6_+_51884217.23-ENST00000581310.1	GCGGGCGCGAGCGGAGATGA	1	1	predicted	STARD6_-_51884087.23-ENST00000581310.1	GGCTGTGACGGAGGTTGGAA	2	2	predicted	STARD6_+_51884217.23-ENST00000581310.1|STARD6_-_51884087.23-ENST00000581310.1
THG1L	P1P2	essential	THG1L_-_157158658.23-P1P2	GCGGTGAGCGAGCTCGACTC	1	3	essential	THG1L_-_157158472.23-P1P2	GTGGGGCGCCTGTAAAGTTA	2	1	essential	THG1L_-_157158658.23-P1P2|THG1L_-_157158472.23-P1P2
ONECUT1	P1P2	nonessential	ONECUT1_+_53082514.23-P1P2	GTGTAACAGTAACAGAGCCA	1	1	predicted	ONECUT1_-_53082519.23-P1P2	GCGCTGGCCAGCTTGAGCCA	2	2	predicted	ONECUT1_+_53082514.23-P1P2|ONECUT1_-_53082519.23-P1P2
ARHGAP21	P1P2	nonessential	ARHGAP21_+_25012355.23-P1P2	Ggcgctggctcggggccgga	1	1	predicted	ARHGAP21_+_25012738.23-P1P2	Gaggcgaggggagagtccgg	2	2	predicted	ARHGAP21_+_25012355.23-P1P2|ARHGAP21_+_25012738.23-P1P2
SAC3D1	P1P2	nonessential	SAC3D1_+_64808757.23-P1P2	GCTCGCAGCCGGGCATGAGG	1	1	predicted	SAC3D1_-_64808789.23-P1P2	GCCGGCTGCGAGCTGCCCGT	3	3	predicted	SAC3D1_+_64808757.23-P1P2|SAC3D1_-_64808789.23-P1P2
TNRC6C	P1P2	nonessential	TNRC6C_-_76037142.23-P1P2	GAGCCTCGATGCAGGCGTAG	1	1	predicted	TNRC6C_-_76037185.23-P1P2	GGTCTCCTAGGAGGGTTGGG	2	2	predicted	TNRC6C_-_76037142.23-P1P2|TNRC6C_-_76037185.23-P1P2
NKX1-1	ENST00000422806.1	nonessential	NKX1-1_+_1400110.23-ENST00000422806.1	GTGCCCAGGAAGCTATGGAC	1	1	predicted	NKX1-1_-_1400097.23-ENST00000422806.1	GCTCCAGCGCGGGGAAAGGC	2	2	predicted	NKX1-1_+_1400110.23-ENST00000422806.1|NKX1-1_-_1400097.23-ENST00000422806.1
ANKRD35	P1P2	nonessential	ANKRD35_-_145562333.23-P1P2	GGCAGTTGCGACAGAGTGTG	1	1	predicted	ANKRD35_-_145562352.23-P1P2	GGGGCTGCTGACAAATGAAC	2	2	predicted	ANKRD35_-_145562333.23-P1P2|ANKRD35_-_145562352.23-P1P2
RDH11	P1P2	nonessential	RDH11_+_68162416.23-P1P2	GCCGCTGCAGCCGGCAGAGA	1	1	predicted	RDH11_+_68162468.23-P1P2	GTAGAAAGAGAAGCCATAGT	2	2	predicted	RDH11_+_68162416.23-P1P2|RDH11_+_68162468.23-P1P2
TTBK2	P1P2	nonessential	TTBK2_+_43212945.23-P1P2	Ggccgcagcggcgatgggag	1	1	predicted	TTBK2_+_43212941.23-P1P2	Gcagcggcgatgggagcggt	2	2	predicted	TTBK2_+_43212945.23-P1P2|TTBK2_+_43212941.23-P1P2
MTX2	P1P2	significant	MTX2_+_177134417.23-P1P2	GGACCGCGCCGCCACCTTCT	1	7	empirical	MTX2_-_177134199.23-P1P2	GCAGGCCTGGCGGTAACCTT	2	8	empirical	MTX2_+_177134417.23-P1P2|MTX2_-_177134199.23-P1P2
NCOR1	P1P2	significant	NCOR1_-_16118644.23-P1P2	GCGGACTAGCAGGAGCCCGG	1	4	empirical	NCOR1_-_16118501.23-P1P2	GCCGCGCCCGGCTCTCTCCT	2	7	empirical	NCOR1_-_16118644.23-P1P2|NCOR1_-_16118501.23-P1P2
CKLF	P1P2	nonessential	CKLF_-_66586509.23-P1P2	GCGAGCTGGGCGAGAAGTAG	1	1	predicted	CKLF_-_66586564.23-P1P2	GCGCTTCGCAGAACCTACTC	2	2	predicted	CKLF_-_66586509.23-P1P2|CKLF_-_66586564.23-P1P2
PIM1	P1P2	significant	PIM1_-_37138008.23-P1P2	GCGAGAGGAGTCGGTGgcag	1	2	empirical	PIM1_+_37138184.23-P1P2	GCGGAAGGCCGAGGGCGAGT	2	3	empirical	PIM1_-_37138008.23-P1P2|PIM1_+_37138184.23-P1P2
PPM1L	P1P2	nonessential	PPM1L_-_160473396.23-P1P2	GcgagccgatccgagccgGG	1	1	predicted	PPM1L_+_160473629.23-P1P2	GGGAGAGCGATCAGCAGGTG	2	2	predicted	PPM1L_-_160473396.23-P1P2|PPM1L_+_160473629.23-P1P2
ZNF17	P1P2	nonessential	ZNF17_+_57922575.23-P1P2	GCAGTCTCGACTCAGCCTGA	1	1	predicted	ZNF17_-_57922543.23-P1P2	GCTTCCTGCAACGCCTCCTG	2	2	predicted	ZNF17_+_57922575.23-P1P2|ZNF17_-_57922543.23-P1P2
DSCAM	P1P2	nonessential	DSCAM_-_42219100.23-P1P2	GCGAGTGAAGCCGAGCGCGG	1	1	predicted	DSCAM_-_42218833.23-P1P2	GGGCGCCGCGCCCCACGCTG	2	2	predicted	DSCAM_-_42219100.23-P1P2|DSCAM_-_42218833.23-P1P2
DEXI	P1P2	nonessential	DEXI_+_11036297.23-P1P2	GCACCGGGAGGGCTACGCGG	1	1	predicted	DEXI_-_11036316.23-P1P2	GGGCCGCCGCGTAGCCCTCC	2	2	predicted	DEXI_+_11036297.23-P1P2|DEXI_-_11036316.23-P1P2
LOC100144595	P1P2	nonessential	LOC100144595_+_155313876.23-P1P2	GGCTGAAGAAAAGCAAGACA	1	1	predicted	LOC100144595_+_155313866.23-P1P2	GAGCAAGACAGGGTAAGTTA	2	2	predicted	LOC100144595_+_155313876.23-P1P2|LOC100144595_+_155313866.23-P1P2
DIRC1	P1P2	nonessential	DIRC1_-_189654807.23-P1P2	Ggtggaaagtaagactttaa	1	1	predicted	DIRC1_+_189654822.23-P1P2	Gtagttgtgtctcttgacat	2	2	predicted	DIRC1_-_189654807.23-P1P2|DIRC1_+_189654822.23-P1P2
SAMD8	P1P2	nonessential	SAMD8_+_76871436.23-P1P2	GCCCGGACCCACCTCCGAGT	1	1	predicted	SAMD8_-_76871470.23-P1P2	GGGGTCCGGGGAGCCCGACT	2	2	predicted	SAMD8_+_76871436.23-P1P2|SAMD8_-_76871470.23-P1P2
VMO1	P1P2	nonessential	VMO1_+_4689643.23-P1P2	GATTCACAGACGCTACAGGA	1	1	predicted	VMO1_-_4689486.23-P1P2	GCCGCTGGCGAAGAATCCAT	2	2	predicted	VMO1_+_4689643.23-P1P2|VMO1_-_4689486.23-P1P2
DYTN	ENST00000452335.2	nonessential	DYTN_-_207583116.23-ENST00000452335.2	GTGAGGACAGGGGAACAAAA	1	1	predicted	DYTN_-_207583104.23-ENST00000452335.2	GGCAGCAGAGGAATGAGGAC	2	2	predicted	DYTN_-_207583116.23-ENST00000452335.2|DYTN_-_207583104.23-ENST00000452335.2
SGOL1	P1P2	essential	SGOL1_+_20227653.23-P1P2	GGCGACGGCGGACGGTGGTA	1	1	essential	SGOL1_+_20227643.23-P1P2	GACGGTGGTACGGTCCTGGA	2	5	essential	SGOL1_+_20227653.23-P1P2|SGOL1_+_20227643.23-P1P2
KERA	P1P2	nonessential	KERA_+_91451662.23-P1P2	GCATGGTGACTGGGACGAGT	1	1	predicted	KERA_+_91451688.23-P1P2	GAGTGGAAACAATAGATCAA	2	2	predicted	KERA_+_91451662.23-P1P2|KERA_+_91451688.23-P1P2
RPH3AL	P1P2	nonessential	RPH3AL_+_202569.23-P1P2	GCTCGGGTCACCCCCGACAA	1	1	predicted	RPH3AL_-_202541.23-P1P2	GACCCAGACAGGCCCCACCA	2	2	predicted	RPH3AL_+_202569.23-P1P2|RPH3AL_-_202541.23-P1P2
PRDM12	P1P2	nonessential	PRDM12_+_133539845.23-P1P2	Gtgggaggaaagcgaacgag	1	1	predicted	PRDM12_-_133540047.23-P1P2	GgctccgggccgcccATGAT	2	2	predicted	PRDM12_+_133539845.23-P1P2|PRDM12_-_133540047.23-P1P2
PSMB11	P1P2	nonessential	PSMB11_-_23511480.23-P1P2	GGGCAGTCCCCTGACACCCA	1	1	predicted	PSMB11_+_23511411.23-P1P2	GCCTGGGGCTGAATGAAGTT	2	2	predicted	PSMB11_-_23511480.23-P1P2|PSMB11_+_23511411.23-P1P2
AKAP7	P1P2	nonessential	AKAP7_+_131456600.23-P1P2	GCGCCGGAACAAGCCAGAAG	1	1	predicted	AKAP7_-_131456599.23-P1P2	GTACCACCGGCGACTCGGGT	2	2	predicted	AKAP7_+_131456600.23-P1P2|AKAP7_-_131456599.23-P1P2
KIAA1009	P1P2	nonessential	KIAA1009_+_84937296.23-P1P2	GGCGCGGAATTCAGAGGCAG	1	1	predicted	KIAA1009_+_84937373.23-P1P2	GGTCATGTGACTCCAGAACC	2	2	predicted	KIAA1009_+_84937296.23-P1P2|KIAA1009_+_84937373.23-P1P2
RBCK1	P1P2	nonessential	RBCK1_+_388973.23-P1P2	GAGGCCCCAGTTCTTCGCAA	1	1	predicted	RBCK1_-_388991.23-P1P2	GCTCCCCTTGCGAAGAACTG	2	2	predicted	RBCK1_+_388973.23-P1P2|RBCK1_-_388991.23-P1P2
ZNF474	P1P2	nonessential	ZNF474_-_121465285.23-P1P2	GCTGCAAGGAATGTGAATCT	1	1	predicted	ZNF474_+_121465242.23-P1P2	GGAGCTGGTGTGAGTTTTTG	2	2	predicted	ZNF474_-_121465285.23-P1P2|ZNF474_+_121465242.23-P1P2
IFT172	P1P2	nonessential	IFT172_-_27712706.23-P1P2	GGCAAGCGCGGTGAGATCTA	1	1	predicted	IFT172_+_27712582.23-P1P2	GTGTCGCTGCGGCTGCGTGG	2	2	predicted	IFT172_-_27712706.23-P1P2|IFT172_+_27712582.23-P1P2
GREB1	P1P2	nonessential	GREB1_+_11679989.23-P1P2	GAGGCAGCCAAGCCAGCCAG	1	1	predicted	GREB1_-_11679963.23-P1P2	GtGGTTGTTGTTGTAGCTCT	2	2	predicted	GREB1_+_11679989.23-P1P2|GREB1_-_11679963.23-P1P2
NTN4	P1P2	nonessential	NTN4_+_96184500.23-P1P2	GCGGGGCAGCCAGAAGAGGT	1	1	predicted	NTN4_+_96184489.23-P1P2	GGAAGAGGTGGGAAAAGCGG	2	2	predicted	NTN4_+_96184500.23-P1P2|NTN4_+_96184489.23-P1P2
CPA3	P1P2	nonessential	CPA3_+_148583109.23-P1P2	GTGGTAGCAATCAAACCCAC	1	1	predicted	CPA3_-_148583077.23-P1P2	GAAACTGCCAGAGGGTCTCA	2	2	predicted	CPA3_+_148583109.23-P1P2|CPA3_-_148583077.23-P1P2
FBXO41	P1P2	nonessential	FBXO41_-_73511579.23-P1P2	GCGCGGGCCGAGGAAAGCAA	1	1	predicted	FBXO41_-_73511522.23-P1P2	GAACCCGGCGggaggaagga	2	2	predicted	FBXO41_-_73511579.23-P1P2|FBXO41_-_73511522.23-P1P2
C9	ENST00000263408.4	nonessential	C9_-_39364617.23-ENST00000263408.4	GTGGCAGGGCAGGTCTGGTA	1	1	predicted	C9_-_39364598.23-ENST00000263408.4	GTGGGTGGCTGCGAGTGGGG	2	2	predicted	C9_-_39364617.23-ENST00000263408.4|C9_-_39364598.23-ENST00000263408.4
PCDH17	P1P2	significant	PCDH17_+_58206307.23-P1P2	GTAAGAAGGAAATCTCGTCT	1	3	empirical	PCDH17_+_58206404.23-P1P2	GGCAAGGCGGTGGCTTCCTG	2	6	empirical	PCDH17_+_58206307.23-P1P2|PCDH17_+_58206404.23-P1P2
PRDM14	P1P2	significant	PRDM14_-_70983451.23-P1P2	GGGACGCTGCGGGGCCACTC	1	1	empirical	PRDM14_-_70983469.23-P1P2	GCGGGCTCGGTAGGCCACTC	2	3	empirical	PRDM14_-_70983451.23-P1P2|PRDM14_-_70983469.23-P1P2
ARHGAP31	P1P2	nonessential	ARHGAP31_+_119013334.23-P1P2	GCGGGGCGAGGAGACTGCCC	1	1	predicted	ARHGAP31_-_119013294.23-P1P2	GCTCTACCAAAGTCGTCTGA	2	2	predicted	ARHGAP31_+_119013334.23-P1P2|ARHGAP31_-_119013294.23-P1P2
DDX5	P1P2	significant	DDX5_-_62502405.23-P1P2	GAGACCGGTAGAAATGAATG	1	3	empirical	DDX5_+_62502182.23-P1P2	GCGGGACCGAGGGTGAGTTT	2	6	empirical	DDX5_-_62502405.23-P1P2|DDX5_+_62502182.23-P1P2
SOX2	P1P2	significant	SOX2_-_181429716.23-P1P2	GACAGCCCCCGTCACATGGA	1	3	empirical	SOX2_+_181429802.23-P1P2	GctcAGTCCTAGTCTTAAAG	2	1	empirical	SOX2_-_181429716.23-P1P2|SOX2_+_181429802.23-P1P2
CCDC104	P1P2	nonessential	CCDC104_+_55746844.23-P1P2	GAAGGAGCCGAGAGGGAGTA	1	1	predicted	CCDC104_-_55746818.23-P1P2	GTTGGTAGCTTCTATCCTGG	2	2	predicted	CCDC104_+_55746844.23-P1P2|CCDC104_-_55746818.23-P1P2
NUDT6	P1P2	significant	NUDT6_+_123843721.23-P1P2	GATTAAGCGGCGTGGAGATG	1	1	empirical	NUDT6_+_123843734.23-P1P2	GGGGCAACGGACGAATTAAG	2	2	empirical	NUDT6_+_123843721.23-P1P2|NUDT6_+_123843734.23-P1P2
IL4R	P1P2	nonessential	IL4R_+_27325289.23-P1P2	GGCGCCCAAGCGGGAAGTGG	1	1	predicted	IL4R_-_27325333.23-P1P2	GCGGACGGCGAATGGAGCAG	2	2	predicted	IL4R_+_27325289.23-P1P2|IL4R_-_27325333.23-P1P2
C5orf64	P1P2	nonessential	C5orf64_-_60933646.23-P1P2	GAGAAGCCTGCAGAATAATT	1	1	predicted	C5orf64_-_60933649.23-P1P2	GAGCCTGCAGAATAATTGGG	2	2	predicted	C5orf64_-_60933646.23-P1P2|C5orf64_-_60933649.23-P1P2
PLAC4	P1P2	nonessential	PLAC4_-_42557171.23-P1P2	Gtggattatgagctacgaat	1	1	predicted	PLAC4_-_42557184.23-P1P2	Gacgaatgggcagtcgaatg	2	2	predicted	PLAC4_-_42557171.23-P1P2|PLAC4_-_42557184.23-P1P2
SLC8B1	P1	nonessential	SLC8B1_+_113772898.23-P1	GGGCGGGGCACCCGGACTGG	1	1	predicted	SLC8B1_+_113772936.23-P1	Ggcccggacgggaagagtag	2	2	predicted	SLC8B1_+_113772898.23-P1|SLC8B1_+_113772936.23-P1
CYYR1	P1P2	nonessential	CYYR1_+_27945514.23-P1P2	GCCCGCGCCTGAGCGCAGTG	1	1	predicted	CYYR1_-_27945552.23-P1P2	GGCGGGGAAGGCGGCCACTC	2	2	predicted	CYYR1_+_27945514.23-P1P2|CYYR1_-_27945552.23-P1P2
TMED2	P1P2	significant	TMED2_-_124069104.23-P1P2	GTAggcggcggtggctgaga	1	5	empirical	TMED2_-_124069112.23-P1P2	Gggtggctgagaaggcagcg	2	3	empirical	TMED2_-_124069104.23-P1P2|TMED2_-_124069112.23-P1P2
C1QTNF4	P1P2	nonessential	C1QTNF4_-_47615942.23-P1P2	GAGGGAAGGTCAGCTAGAGA	1	1	predicted	C1QTNF4_-_47615924.23-P1P2	GTGGGGAGGCGTGAGGGAAA	2	2	predicted	C1QTNF4_-_47615942.23-P1P2|C1QTNF4_-_47615924.23-P1P2
KDM5D	P1P2	nonessential	KDM5D_+_21906586.23-P1P2	GCAGGGCCCGGAGGTCAAGA	1	1	predicted	KDM5D_+_21906555.23-P1P2	GAACTAGGATCCCTGACGAT	2	2	predicted	KDM5D_+_21906586.23-P1P2|KDM5D_+_21906555.23-P1P2
RNASEH1	P1P2	nonessential	RNASEH1_+_3606182.23-P1P2	GGGAGAGAAGGGGCCCAACA	1	1	predicted	RNASEH1_+_3605908.23-P1P2	GGAAGTGCGGTGTTGAGCGC	2	2	predicted	RNASEH1_+_3606182.23-P1P2|RNASEH1_+_3605908.23-P1P2
LOC729574	NM_001282321	nonessential	LOC729574_+_16999488.23-NM_001282321	GTTGAAGACACCATGGAAGT	1	1	predicted	LOC729574_-_16999806.23-NM_001282321	GGGCGCCGGCCTGATTTCCC	2	2	predicted	LOC729574_+_16999488.23-NM_001282321|LOC729574_-_16999806.23-NM_001282321
AHDC1	P1P2	nonessential	AHDC1_+_27930650.23-P1P2	GAGGTAAGGCGAGCTCGCAG	1	1	predicted	AHDC1_+_27930664.23-P1P2	GATGGTGAGCGGCGAAGGTA	3	3	predicted	AHDC1_+_27930650.23-P1P2|AHDC1_+_27930664.23-P1P2
EMILIN1	P1P2	nonessential	EMILIN1_-_27301510.23-P1P2	GCGCCTCCGAACAGCCACAG	1	1	predicted	EMILIN1_-_27301546.23-P1P2	GCCCCAGGATCCGGTCATCA	2	2	predicted	EMILIN1_-_27301510.23-P1P2|EMILIN1_-_27301546.23-P1P2
ZNF8	P1P2	nonessential	ZNF8_+_58790394.23-P1P2	GGGTGATCCCCAGACCAGAG	1	1	predicted	ZNF8_+_58790344.23-P1P2	GGCCGAACGCCGGACAATGG	2	2	predicted	ZNF8_+_58790394.23-P1P2|ZNF8_+_58790344.23-P1P2
SPDEF	P1P2	significant	SPDEF_-_34524042.23-P1P2	GTTGGAGGACTGGGTCTGTG	1	1	empirical	SPDEF_-_34523679.23-P1P2	GAGGGAAAGACCCCATGCCA	2	1	empirical	SPDEF_-_34524042.23-P1P2|SPDEF_-_34523679.23-P1P2
POLE3	P1P2	significant	POLE3_+_116172606.23-P1P2	GACGCAGTAGCTCCCTGAAG	1	6	empirical	POLE3_+_116172595.23-P1P2	GCCCTGAAGCGGAGGCGAAG	2	3	empirical	POLE3_+_116172606.23-P1P2|POLE3_+_116172595.23-P1P2
LRIG1	P1P2	nonessential	LRIG1_+_66551437.23-P1P2	GcggggAGGCGAACAGCAAG	1	1	predicted	LRIG1_-_66551388.23-P1P2	GCGCAGCCTCGGGTTCCGCA	2	2	predicted	LRIG1_+_66551437.23-P1P2|LRIG1_-_66551388.23-P1P2
FAM71C	P1P2	nonessential	FAM71C_-_100041552.23-P1P2	GGCAGTGGATGGTTCAGGTT	1	1	predicted	FAM71C_-_100041581.23-P1P2	GGCAGTGGGATTGCCAGTTA	2	2	predicted	FAM71C_-_100041552.23-P1P2|FAM71C_-_100041581.23-P1P2
CALU	P1P2	nonessential	CALU_+_128379432.23-P1P2	GGTGGCCGCCGCTCACCCAC	1	1	predicted	CALU_-_128379486.23-P1P2	GCTGTGGGGGCTACGAGGAA	2	2	predicted	CALU_+_128379432.23-P1P2|CALU_-_128379486.23-P1P2
TMEFF1	P1P2	nonessential	TMEFF1_+_103235410.23-P1P2	GACCCCGGCCCGCCCGGTGA	1	1	predicted	TMEFF1_-_103235473.23-P1P2	GGGCCACGGACACAAAGGGA	2	2	predicted	TMEFF1_+_103235410.23-P1P2|TMEFF1_-_103235473.23-P1P2
IL36A	P1P2	nonessential	IL36A_-_113763086.23-P1P2	GTCATAATGGTAGGGATACA	1	1	predicted	IL36A_-_113763224.23-P1P2	GAGGCCTGGGCAGGATTCAT	2	2	predicted	IL36A_-_113763086.23-P1P2|IL36A_-_113763224.23-P1P2
BMP4	P2	nonessential	BMP4_-_54420114.23-P2	GTCGGGATGGCACTACGGAA	1	1	predicted	BMP4_-_54420101.23-P2	GAGCAGTGCGTTGCTCGGGA	2	2	predicted	BMP4_-_54420114.23-P2|BMP4_-_54420101.23-P2
MAFF	P1P2	nonessential	MAFF_-_38598138.23-P1P2	GGAGCGGAGGGGAGACTGAC	1	1	predicted	MAFF_-_38598112.23-P1P2	GCCCGGTTCAGAGCGACCTG	2	2	predicted	MAFF_-_38598138.23-P1P2|MAFF_-_38598112.23-P1P2
OR52A5	ENST00000307388.1	nonessential	OR52A5_-_5153868.23-ENST00000307388.1	GAGACTGAGCCATTGAATGT	1	1	predicted	OR52A5_+_5153855.23-ENST00000307388.1	GAAATCATGCCGACATTCAA	2	2	predicted	OR52A5_-_5153868.23-ENST00000307388.1|OR52A5_+_5153855.23-ENST00000307388.1
TMEM178A	P1P2	nonessential	TMEM178A_+_39893325.23-P1P2	Gagcagccggcgccccagcg	1	1	predicted	TMEM178A_-_39893126.23-P1P2	GcgggAAGCCATGGAGCCGC	2	2	predicted	TMEM178A_+_39893325.23-P1P2|TMEM178A_-_39893126.23-P1P2
UTY	P1P2	nonessential	UTY_-_15591513.23-P1P2	GTCATCACCGAAGGCAACAG	1	1	predicted	UTY_+_15591851.23-P1P2	GGAGGTCGCGGCGGCTGCGT	2	2	predicted	UTY_-_15591513.23-P1P2|UTY_+_15591851.23-P1P2
ZNF467	P1P2	nonessential	ZNF467_-_149470678.23-P1P2	GCTGCGGGGAAGGGTGCCAA	1	1	predicted	ZNF467_-_149470577.23-P1P2	GAAGTGGGAGCTCAGGACGg	2	2	predicted	ZNF467_-_149470678.23-P1P2|ZNF467_-_149470577.23-P1P2
GZMH	P1P2	nonessential	GZMH_+_25078835.23-P1P2	GACACCAACAGCTCTGACCT	1	1	predicted	GZMH_+_25078925.23-P1P2	GACCAGAAGGGGACAAGTCT	2	2	predicted	GZMH_+_25078835.23-P1P2|GZMH_+_25078925.23-P1P2
CLASP1	P1P2	significant	CLASP1_-_122406626.23-P1P2	GCACCCGGCAGGGGAGACTC	1	8	empirical	CLASP1_-_122406649.23-P1P2	GTAGGAAGGGGGCCCGGGTG	2	8	empirical	CLASP1_-_122406626.23-P1P2|CLASP1_-_122406649.23-P1P2
GPLD1	P1P2	nonessential	GPLD1_+_24495537.23-P1P2	GCAGCGGCAGAAAGCCTCGT	1	1	predicted	GPLD1_+_24495477.23-P1P2	GTCGGCTACCATGCCCAGAG	2	2	predicted	GPLD1_+_24495537.23-P1P2|GPLD1_+_24495477.23-P1P2
ZNF266	P1P2	nonessential	ZNF266_+_9546150.23-P1P2	GGCGAGGTCGGATGACGGGT	1	1	predicted	ZNF266_+_9546133.23-P1P2	GGTGGGAGCCAGCGGTGGAA	2	2	predicted	ZNF266_+_9546150.23-P1P2|ZNF266_+_9546133.23-P1P2
C2orf71	P1P2	nonessential	C2orf71_+_29297357.23-P1P2	GCGCTGCTCACTAACAGCAG	1	1	predicted	C2orf71_+_29297324.23-P1P2	GAGAACAACAACAGGACGAC	2	2	predicted	C2orf71_+_29297357.23-P1P2|C2orf71_+_29297324.23-P1P2
TMEM221	P1P2	nonessential	TMEM221_+_17559442.23-P1P2	GCCGGCTGCGACCAGCACCC	1	1	predicted	TMEM221_-_17559439.23-P1P2	GGGGGTCGCCAGACGGACGG	2	2	predicted	TMEM221_+_17559442.23-P1P2|TMEM221_-_17559439.23-P1P2
MERTK	P1P2	nonessential	MERTK_+_112656181.23-P1P2	GCCGGGCAGTGAGTGCCGAG	1	1	predicted	MERTK_-_112656217.23-P1P2	GTGCCCGGGCCGCCCGGACA	2	2	predicted	MERTK_+_112656181.23-P1P2|MERTK_-_112656217.23-P1P2
KCNK16	P1P2	nonessential	KCNK16_+_39290694.23-P1P2	GCGGCCGAGAGAGCCCACTG	1	1	predicted	KCNK16_+_39290716.23-P1P2	GTCAAGGGTGAAGACGCTGG	2	2	predicted	KCNK16_+_39290694.23-P1P2|KCNK16_+_39290716.23-P1P2
CLEC3A	P1P2	nonessential	CLEC3A_+_78056468.23-P1P2	GAGCCCCCTTAGAGCAGCTA	1	1	predicted	CLEC3A_-_78056484.23-P1P2	GTCCTTCCATAGCTGCTCTA	2	2	predicted	CLEC3A_+_78056468.23-P1P2|CLEC3A_-_78056484.23-P1P2
KRT6B	P1P2	nonessential	KRT6B_-_52845963.23-P1P2	GTCCAGTAGCAGCTTATATA	1	1	predicted	KRT6B_-_52845915.23-P1P2	GTGAGAGGCTGGAGGCGAGA	2	2	predicted	KRT6B_-_52845963.23-P1P2|KRT6B_-_52845915.23-P1P2
PLEKHO2	P1P2	nonessential	PLEKHO2_+_65134073.23-P1P2	GGGCCCAAGAAACTTCGGgg	1	1	predicted	PLEKHO2_-_65134106.23-P1P2	GTTCTTGGGCCCCCGGCAGC	2	2	predicted	PLEKHO2_+_65134073.23-P1P2|PLEKHO2_-_65134106.23-P1P2
ELOVL4	P1P2	nonessential	ELOVL4_-_80657222.23-P1P2	GGGTTCCCGGGAGAAAGACG	1	1	predicted	ELOVL4_-_80657225.23-P1P2	GTCCCGGGAGAAAGACGAGG	2	2	predicted	ELOVL4_-_80657222.23-P1P2|ELOVL4_-_80657225.23-P1P2
C8orf37	P1P2	nonessential	C8orf37_+_96281410.23-P1P2	GGCCAGGCGATTCAAGATGG	1	1	predicted	C8orf37_+_96281413.23-P1P2	GAAGGCCAGGCGATTCAAGA	2	2	predicted	C8orf37_+_96281410.23-P1P2|C8orf37_+_96281413.23-P1P2
RHOB	P1P2	nonessential	RHOB_-_20646899.23-P1P2	GGCGAGGCCCGGAGAGACCC	1	1	predicted	RHOB_+_20646894.23-P1P2	GCTCGGCCTAGCTCTCTCCC	2	2	predicted	RHOB_-_20646899.23-P1P2|RHOB_+_20646894.23-P1P2
ZBTB45	P1P2	nonessential	ZBTB45_+_59031107.23-P1P2	GGTGCCTGAAGAGGAGTCGG	1	1	predicted	ZBTB45_+_59031128.23-P1P2	GAAGCGGCCACGGCAGAGCC	2	2	predicted	ZBTB45_+_59031107.23-P1P2|ZBTB45_+_59031128.23-P1P2
PIAS2	P2	nonessential	PIAS2_+_44500067.23-P2	GCAGGAGCTGCTACACATTG	1	1	predicted	PIAS2_+_44500062.23-P2	GGCTGCTACACATTGAGGAA	2	2	predicted	PIAS2_+_44500067.23-P2|PIAS2_+_44500062.23-P2
SMPD4	P1P2	significant	SMPD4_+_130939639.23-P1P2	Ggcgctctaggagccgggag	1	2	empirical	SMPD4_-_130939137.23-P1P2	GGCGTCGCTCGCCTCAGAGA	1	1	predicted	SMPD4_+_130939639.23-P1P2|SMPD4_-_130939137.23-P1P2
TPRG1	ENST00000433971.1	nonessential	TPRG1_-_188665043.23-ENST00000433971.1	GCCCGGTAAGGCAAATGGAG	1	1	predicted	TPRG1_-_188664963.23-ENST00000433971.1	GGGAGGAGGATGCTCATCAT	2	2	predicted	TPRG1_-_188665043.23-ENST00000433971.1|TPRG1_-_188664963.23-ENST00000433971.1
STYX	P1P2	nonessential	STYX_-_53197144.23-P1P2	GAGCCAGCCCGAGGGTCGGC	1	1	predicted	STYX_+_53197016.23-P1P2	GGTCCCAGTGACTCCAGCAG	2	2	predicted	STYX_-_53197144.23-P1P2|STYX_+_53197016.23-P1P2
TM9SF3	P1P2	nonessential	TM9SF3_-_98346713.23-P1P2	GGGGCGCGGACAGACGCACG	1	1	predicted	TM9SF3_+_98346507.23-P1P2	GctgctgcCCCGGACCCGGG	2	2	predicted	TM9SF3_-_98346713.23-P1P2|TM9SF3_+_98346507.23-P1P2
EDN1	P1P2	nonessential	EDN1_+_12290645.23-P1P2	GCACGCGGCGGTGGAGAGCT	1	1	predicted	EDN1_+_12290600.23-P1P2	GTCGCCTGGCGCAGATGCAG	2	2	predicted	EDN1_+_12290645.23-P1P2|EDN1_+_12290600.23-P1P2
A4GALT	P1P2	nonessential	A4GALT_-_43116819.23-P1P2	GGTACCTCTAGCTCCAgcgg	1	1	predicted	A4GALT_+_43116792.23-P1P2	GcTGGAGCTAGAGGTACGAG	2	2	predicted	A4GALT_-_43116819.23-P1P2|A4GALT_+_43116792.23-P1P2
NUDT7	P1P2	nonessential	NUDT7_-_77756446.23-P1P2	GGACCGACCGAGCAGCTCCG	1	1	predicted	NUDT7_+_77756469.23-P1P2	GAAGTCGTGACATTGCCCTG	2	2	predicted	NUDT7_-_77756446.23-P1P2|NUDT7_+_77756469.23-P1P2
2022-09-04	P1	nonessential	SEPT4_-_56609378.23-P1	GACAGCGCCCGAGCGACCCG	1	1	predicted	SEPT4_-_56609381.23-P1	GGCGCCCGAGCGACCCGCGG	2	2	predicted	SEPT4_-_56609378.23-P1|SEPT4_-_56609381.23-P1
PLAA	P1P2	significant	PLAA_-_26947187.23-P1P2	GAAGAGCCCGAGAGCCGGTA	1	1	empirical	PLAA_-_26947192.23-P1P2	GCCCGAGAGCCGGTACGGAA	2	3	empirical	PLAA_-_26947187.23-P1P2|PLAA_-_26947192.23-P1P2
ZNF98	P1P2	nonessential	ZNF98_-_22604884.23-P1P2	GGCTAGGCAAGGAGAACTAG	1	1	predicted	ZNF98_-_22605127.23-P1P2	GAAGACGAGACCAGGAACTC	2	2	predicted	ZNF98_-_22604884.23-P1P2|ZNF98_-_22605127.23-P1P2
OR10K2	ENST00000314902.2	nonessential	OR10K2_+_158390631.23-ENST00000314902.2	GGAGCGGGTCAATGAGACTG	1	1	predicted	OR10K2_+_158390647.23-ENST00000314902.2	GTGATGTATGCTCCATGGAG	2	2	predicted	OR10K2_+_158390631.23-ENST00000314902.2|OR10K2_+_158390647.23-ENST00000314902.2
TLL1	P1P2	nonessential	TLL1_+_166794820.23-P1P2	GTGGCTAGGGGCCCACGGGT	1	1	predicted	TLL1_+_166794879.23-P1P2	GGCCGCCGGGACAGTAGAGA	2	2	predicted	TLL1_+_166794820.23-P1P2|TLL1_+_166794879.23-P1P2
ORC3	P1P2	significant	ORC3_-_88299910.23-P1P2	GGCTACGTCCTCGATGTCTA	1	1	empirical	ORC3_-_88299920.23-P1P2	GCGATGTCTAAGGTATGTGG	2	3	empirical	ORC3_-_88299910.23-P1P2|ORC3_-_88299920.23-P1P2
ZNF337	P1P2	nonessential	ZNF337_-_25677436.23-P1P2	GGAGGCGGTGAGGTCACCGA	1	1	predicted	ZNF337_+_25677430.23-P1P2	GGAGATGCGTGGTCCACCAT	2	2	predicted	ZNF337_-_25677436.23-P1P2|ZNF337_+_25677430.23-P1P2
ATP5D	P1P2	significant	ATP5D_+_1241904.23-P1P2	Ggcggcctcggcataggcac	1	2	empirical	ATP5D_+_1241964.23-P1P2	GGTGGGAGAGGCGAAGGTGA	2	1	empirical	ATP5D_+_1241904.23-P1P2|ATP5D_+_1241964.23-P1P2
CLIC2	P1P2	significant	CLIC2_-_154563883.23-P1P2	GTAGTGGACTGAGTCAGACC	1	1	predicted	CLIC2_-_154563867.23-P1P2	GAAGACCGTCTAGCTTGTAG	2	2	predicted	CLIC2_-_154563883.23-P1P2|CLIC2_-_154563867.23-P1P2
TOMM5	P1P2	significant	TOMM5_+_37592229.23-P1P2	GAGGTCTGCGGGTCAGGGTC	1	10	empirical	TOMM5_-_37592577.23-P1P2	GCGCCGCGCTCTGCTCTCCA	2	3	empirical	TOMM5_+_37592229.23-P1P2|TOMM5_-_37592577.23-P1P2
TTLL2	P1P2	nonessential	TTLL2_+_167738657.23-P1P2	GCAGGTCCCGCCCTCTCATT	1	1	predicted	TTLL2_-_167738669.23-P1P2	GGAACCAGCGCCCAATGAGA	2	2	predicted	TTLL2_+_167738657.23-P1P2|TTLL2_-_167738669.23-P1P2
DCTN6	P1P2	significant	DCTN6_+_30013892.23-P1P2	GAGTCTTCTCCGCCATGGTA	1	5	empirical	DCTN6_-_30013902.23-P1P2	GTCCAATTGGGGCCGTACCA	2	4	empirical	DCTN6_+_30013892.23-P1P2|DCTN6_-_30013902.23-P1P2
C15orf62	P1P2	nonessential	C15orf62_-_41062271.23-P1P2	GAGGAGCCAGGCAAACACCA	1	1	predicted	C15orf62_+_41062226.23-P1P2	GATGTCTCTGGGGCAGTGTG	2	2	predicted	C15orf62_-_41062271.23-P1P2|C15orf62_+_41062226.23-P1P2
TAF5L	P1P2	significant	TAF5L_-_229761813.23-P1P2	GGCTCCATGACTGACTGACA	1	2	empirical	TAF5L_+_229761795.23-P1P2	GGCTCCGTGTCAGTCAGTCA	2	3	empirical	TAF5L_-_229761813.23-P1P2|TAF5L_+_229761795.23-P1P2
ATG5	P1P2	significant	ATG5_+_106773313.23-P1P2	GTAGGTGTGGTAGGAAGGAG	1	1	empirical	ATG5_+_106773494.23-P1P2	GCCCCGCAGGACAGTGTGTC	2	2	empirical	ATG5_+_106773313.23-P1P2|ATG5_+_106773494.23-P1P2
CRABP2	P1P2	nonessential	CRABP2_-_156675360.23-P1P2	GTGGAACCAAGACAAGTCCA	1	1	predicted	CRABP2_+_156675317.23-P1P2	GGAACCTGACGACCCGGCGA	2	2	predicted	CRABP2_-_156675360.23-P1P2|CRABP2_+_156675317.23-P1P2
AZI1	P1P2	nonessential	AZI1_-_79196759.23-P1P2	GCGGCCGGGGTGAGCAGCGG	1	1	predicted	AZI1_-_79196732.23-P1P2	GAGGCCCGGTGACAATGAAG	2	2	predicted	AZI1_-_79196759.23-P1P2|AZI1_-_79196732.23-P1P2
SLC36A1	P1	nonessential	SLC36A1_-_150827230.23-P1	GCTGATACTGAACCCGGGAA	1	1	predicted	SLC36A1_-_150827197.23-P1	GGGCTGCCGGGCAGCAAAGG	2	2	predicted	SLC36A1_-_150827230.23-P1|SLC36A1_-_150827197.23-P1
ARL4A	P1P2	nonessential	ARL4A_-_12726525.23-P1P2	GTGCCGGGCGAGCACCGTTA	1	1	predicted	ARL4A_-_12727353.23-P1P2	GACCCAGACTCCAGATCGGG	2	2	predicted	ARL4A_-_12726525.23-P1P2|ARL4A_-_12727353.23-P1P2
OSTM1	P1P2	nonessential	OSTM1_+_108395957.23-P1P2	GACGCGCCCTCCTCGTGACC	1	1	predicted	OSTM1_-_108395740.23-P1P2	GGGTCGTGGAAGACCCTGTG	2	2	predicted	OSTM1_+_108395957.23-P1P2|OSTM1_-_108395740.23-P1P2
TMEM27	P1P2	nonessential	TMEM27_-_15682866.23-P1P2	GTGACAGAGTTCAGCATGAA	1	1	predicted	TMEM27_-_15682910.23-P1P2	GCCACAACATTCTTTCAGGG	2	2	predicted	TMEM27_-_15682866.23-P1P2|TMEM27_-_15682910.23-P1P2
ZC3HAV1	P1P2	significant	ZC3HAV1_-_138794133.23-P1P2	GGACTCGGTTCCGCGGAAAT	1	2	empirical	ZC3HAV1_-_138793733.23-P1P2	GGGACAGTCCACCCCGACCA	2	6	empirical	ZC3HAV1_-_138794133.23-P1P2|ZC3HAV1_-_138793733.23-P1P2
C12orf40	P1P2	nonessential	C12orf40_+_40020045.23-P1P2	GGCTTCAGCAGGATCCCCCA	1	1	predicted	C12orf40_+_40020026.23-P1P2	GGGGCCTCCTGACAACGTCA	2	2	predicted	C12orf40_+_40020045.23-P1P2|C12orf40_+_40020026.23-P1P2
C1QTNF9	ENST00000382071.2	nonessential	C1QTNF9_+_24881359.23-ENST00000382071.2	GTTCTCCCACGCCTACCCAG	1	1	predicted	C1QTNF9_-_24881366.23-ENST00000382071.2	GGGAGCTCCATGTAACCACT	2	2	predicted	C1QTNF9_+_24881359.23-ENST00000382071.2|C1QTNF9_-_24881366.23-ENST00000382071.2
SACS	ENST00000382292.3	nonessential	SACS_+_23985789.23-ENST00000382292.3	GTTTACATCTGCTGAGATGA	1	1	predicted	SACS_+_23985631.23-ENST00000382292.3	GTTATCCTGAGAACTTCCAT	2	2	predicted	SACS_+_23985789.23-ENST00000382292.3|SACS_+_23985631.23-ENST00000382292.3
OPHN1	P1P2	nonessential	OPHN1_-_67653264.23-P1P2	GTTGGGCCCGCCCAAGGTGT	1	1	predicted	OPHN1_-_67653303.23-P1P2	GCTGGGAACAGCCTCTCTAC	2	2	predicted	OPHN1_-_67653264.23-P1P2|OPHN1_-_67653303.23-P1P2
FJX1	P1P2	significant	FJX1_-_35640407.23-P1P2	GTGGCGTGGGACGCCCGCGG	1	4	empirical	FJX1_-_35640344.23-P1P2	GCAcggcgcccggcccggag	2	7	empirical	FJX1_-_35640407.23-P1P2|FJX1_-_35640344.23-P1P2
HSPB8	P1P2	nonessential	HSPB8_+_119616784.23-P1P2	GGAACCGCTGAGGTCTAGAG	1	1	predicted	HSPB8_+_119616759.23-P1P2	GCAGGAGcttaataaaccca	2	2	predicted	HSPB8_+_119616784.23-P1P2|HSPB8_+_119616759.23-P1P2
THOC7	P1P2	significant	THOC7_-_63849512.23-P1P2	Ggcggcggcgcaagctgagg	1	1	empirical	THOC7_-_63849519.23-P1P2	Gcgcaagctgaggcggcggt	2	2	empirical	THOC7_-_63849512.23-P1P2|THOC7_-_63849519.23-P1P2
CLEC2A	P1P2	nonessential	CLEC2A_-_10084929.23-P1P2	GCGCAGCTCTGGATTAATCA	1	1	predicted	CLEC2A_+_10084902.23-P1P2	GTTAATCCAGAGCTGCGGGA	2	2	predicted	CLEC2A_-_10084929.23-P1P2|CLEC2A_+_10084902.23-P1P2
CAPN7	P1P2	nonessential	CAPN7_-_15247778.23-P1P2	GCCGCTGGGGCCGCGAAGTG	1	1	predicted	CAPN7_-_15247745.23-P1P2	GCCTGCGTCGGGCGGCTGGT	2	2	predicted	CAPN7_-_15247778.23-P1P2|CAPN7_-_15247745.23-P1P2
KRTAP4-9	ENST00000391415.1	nonessential	KRTAP4-9_+_39261819.23-ENST00000391415.1	GGGGGCGGGAACAAGTGGGT	1	1	predicted	KRTAP4-9_+_39261928.23-ENST00000391415.1	GAAGTGGGTTGGCAGCACGC	2	2	predicted	KRTAP4-9_+_39261819.23-ENST00000391415.1|KRTAP4-9_+_39261928.23-ENST00000391415.1
LHFPL3	P1P2	nonessential	LHFPL3_+_103969261.23-P1P2	GTGAGCCGGGAGCATCgcgg	1	1	predicted	LHFPL3_-_103969287.23-P1P2	GgcGATGCTCCCGGCTCAGG	2	2	predicted	LHFPL3_+_103969261.23-P1P2|LHFPL3_-_103969287.23-P1P2
OR10A3	ENST00000360759.3	nonessential	OR10A3_+_7960862.23-ENST00000360759.3	GTTCCTCCTGAACCTATCTG	1	1	predicted	OR10A3_-_7960881.23-ENST00000360759.3	GCACCACAGATAGGTTCAGG	2	2	predicted	OR10A3_+_7960862.23-ENST00000360759.3|OR10A3_-_7960881.23-ENST00000360759.3
TOP1MT	P1P2	nonessential	TOP1MT_+_144416976.23-P1P2	GGCTCTGACGCTGCTCGGGG	1	1	predicted	TOP1MT_+_144417016.23-P1P2	GCTGGCAGATGCGCGTGGTG	2	2	predicted	TOP1MT_+_144416976.23-P1P2|TOP1MT_+_144417016.23-P1P2
ATP5J2	P1P2	significant	ATP5J2_+_99063727.23-P1P2	GGAGTGTCCGGCCCCAGGTA	1	3	empirical	ATP5J2_-_99063736.23-P1P2	GGAGTCCAAACAGCCTTACC	2	1	empirical	ATP5J2_+_99063727.23-P1P2|ATP5J2_-_99063736.23-P1P2
CBFA2T3	P2	significant	CBFA2T3_+_89043351.23-P2	GGGAGGGCCTCGGCTTTCCA	1	3	empirical	CBFA2T3_-_89043387.23-P2	GGCCCTCCCGGCCACCAACT	2	4	empirical	CBFA2T3_+_89043351.23-P2|CBFA2T3_-_89043387.23-P2
CPZ	P1P2	nonessential	CPZ_+_8594519.23-P1P2	GGACGGCCAGCGCAGTGATG	1	1	predicted	CPZ_+_8594586.23-P1P2	GGGCGACGACCAGGACTGTA	2	2	predicted	CPZ_+_8594519.23-P1P2|CPZ_+_8594586.23-P1P2
LCE2C	ENST00000368783.1	nonessential	LCE2C_-_152647975.23-ENST00000368783.1	GGGCCTACCGGAgctcatat	1	1	predicted	LCE2C_-_152647980.23-ENST00000368783.1	GACCGGAgctcatataggtg	2	2	predicted	LCE2C_-_152647975.23-ENST00000368783.1|LCE2C_-_152647980.23-ENST00000368783.1
SOX12	P1P2	nonessential	SOX12_-_306605.23-P1P2	GGCGCGAGGGCCAAGCGGGA	1	1	predicted	SOX12_+_306551.23-P1P2	GACCATCGCGCCTGGGCCCG	2	2	predicted	SOX12_-_306605.23-P1P2|SOX12_+_306551.23-P1P2
SPRR2A	P1P2	nonessential	SPRR2A_-_153029984.23-P1P2	GATCAGTGCTCAGGTACCAG	1	1	predicted	SPRR2A_+_153029978.23-P1P2	GTGCACGACTCTTAAACCCC	2	2	predicted	SPRR2A_-_153029984.23-P1P2|SPRR2A_+_153029978.23-P1P2
TNRC6B	P1P2	nonessential	TNRC6B_-_40440879.23-P1P2	GGCTGCAAGGCGAAACGGGA	1	1	predicted	TNRC6B_+_40440893.23-P1P2	GCGTCGTAGGGGGGACTGAG	2	2	predicted	TNRC6B_-_40440879.23-P1P2|TNRC6B_+_40440893.23-P1P2
SATB1	P2	nonessential	SATB1_-_18486329.23-P2	GTAAAGGGGAGAGCGAGGCG	1	1	predicted	SATB1_-_18486324.23-P2	GGCGTTTAAAGGGGAGAGCG	2	2	predicted	SATB1_-_18486329.23-P2|SATB1_-_18486324.23-P2
ADAM23	P1P2	nonessential	ADAM23_+_207308275.23-P1P2	GGCCGCTTCAGCGACTGCGG	1	1	predicted	ADAM23_-_207308295.23-P1P2	GGCCCCCGCAGTCGCTGAAG	2	2	predicted	ADAM23_+_207308275.23-P1P2|ADAM23_-_207308295.23-P1P2
SEMA4C	P1	nonessential	SEMA4C_+_97535803.23-P1	GGCCGCGCTGGAGAAAGAGC	1	1	predicted	SEMA4C_-_97535799.23-P1	GGCTCCCCGCGCCACCACGG	2	2	predicted	SEMA4C_+_97535803.23-P1|SEMA4C_-_97535799.23-P1
ROBO3	P1P2	nonessential	ROBO3_-_124746765.23-P1P2	GGGCGGGGCCCGCTGAAAGA	1	1	predicted	ROBO3_-_124746745.23-P1P2	GCGGCGGGGTCTGGATGGAA	2	2	predicted	ROBO3_-_124746765.23-P1P2|ROBO3_-_124746745.23-P1P2
EPB41L2	P1P2	nonessential	EPB41L2_+_131384358.23-P1P2	GGAAACCTAGCGGAGGGAGG	1	1	predicted	EPB41L2_+_131384391.23-P1P2	GCCTCTGACGGCCCCAGTCA	2	2	predicted	EPB41L2_+_131384358.23-P1P2|EPB41L2_+_131384391.23-P1P2
MYPN	P2	nonessential	MYPN_-_69865917.23-P2	GGATCCTGGTTGATTGATAT	1	1	predicted	MYPN_-_69865886.23-P2	GCAAGTTAGGCAGTGAGATT	2	2	predicted	MYPN_-_69865917.23-P2|MYPN_-_69865886.23-P2
TMEM14B	P1P2	nonessential	TMEM14B_+_10748085.23-P1P2	GAGGCCCGCGGAGTCCACTA	1	1	predicted	TMEM14B_+_10748047.23-P1P2	GCACAGCAGCCAGGTCTCTC	2	2	predicted	TMEM14B_+_10748085.23-P1P2|TMEM14B_+_10748047.23-P1P2
KCNE4	P1P2	nonessential	KCNE4_-_223916944.23-P1P2	GCAGAGCAGAAGAACCCTCT	1	1	predicted	KCNE4_+_223916987.23-P1P2	GTAGCCTTGCTGACTTACCA	2	2	predicted	KCNE4_-_223916944.23-P1P2|KCNE4_+_223916987.23-P1P2
TMEM206	P1P2	nonessential	TMEM206_-_212588217.23-P1P2	GAGGCGAAACCGGTCCGGAG	1	1	predicted	TMEM206_-_212588212.23-P1P2	GCCGCGAGGCGAAACCGGTC	2	2	predicted	TMEM206_-_212588217.23-P1P2|TMEM206_-_212588212.23-P1P2
SPTLC2	P1P2	significant	SPTLC2_-_78082962.23-P1P2	GGCAAGGCAGGCTCTGTAGG	1	1	empirical	SPTLC2_-_78082889.23-P1P2	GGCCATTCGCCCGCACCGTG	2	2	empirical	SPTLC2_-_78082962.23-P1P2|SPTLC2_-_78082889.23-P1P2
PANK3	P1P2	nonessential	PANK3_-_168006328.23-P1P2	GATGGACGGCCTCCGATCCG	1	1	predicted	PANK3_+_168006318.23-P1P2	GTGCTCTCAGTGCCCCGGAT	2	2	predicted	PANK3_-_168006328.23-P1P2|PANK3_+_168006318.23-P1P2
TAP2	P1P2	nonessential	TAP2_+_32806495.23-P1P2	GCAGAGCCGGTAGCGAGGTT	1	1	predicted	TAP2_+_32806508.23-P1P2	GGTAGCTGGCGGACCAGAGC	2	2	predicted	TAP2_+_32806495.23-P1P2|TAP2_+_32806508.23-P1P2
KIAA1598	P1P2	nonessential	KIAA1598_-_118764618.23-P1P2	GGGTGGGGCCGGGAATAAAA	1	1	predicted	KIAA1598_-_118764678.23-P1P2	GAGAAAAAGCAAGATGCCGG	2	2	predicted	KIAA1598_-_118764618.23-P1P2|KIAA1598_-_118764678.23-P1P2
FCGR2B	ENST00000236937.9	nonessential	FCGR2B_+_161632951.23-ENST00000236937.9	GTGGCGGATTCTACCCTAGA	1	1	predicted	FCGR2B_-_161633178.23-ENST00000236937.9	GCCAGGAGGGAGAGAGGAAC	2	2	predicted	FCGR2B_+_161632951.23-ENST00000236937.9|FCGR2B_-_161633178.23-ENST00000236937.9
NFATC2	P1	nonessential	NFATC2_-_50159227.23-P1	GCGCGCCCGGGGAAGCTGAG	1	1	predicted	NFATC2_+_50159020.23-P1	GCGCCATGAACGCCCCCGAG	2	2	predicted	NFATC2_-_50159227.23-P1|NFATC2_+_50159020.23-P1
LHFPL4	P1P2	significant	LHFPL4_-_9595441.23-P1P2	GGGCTCGGCGCTCCCAGCAG	1	1	empirical	LHFPL4_-_9595057.23-P1P2	GACAGCTAGAGCGGGATCGG	2	7	empirical	LHFPL4_-_9595441.23-P1P2|LHFPL4_-_9595057.23-P1P2
GIMAP5	P1P2	nonessential	GIMAP5_+_150434764.23-P1P2	GTGTTGTGCCCTGTCCTCCA	1	1	predicted	GIMAP5_+_150434893.23-P1P2	GCAGCGAACCCAGAAGTGAG	2	2	predicted	GIMAP5_+_150434764.23-P1P2|GIMAP5_+_150434893.23-P1P2
CYB5R4	P1P2	significant	CYB5R4_-_84569464.23-P1P2	GGAGGTGCTGTCCCGTCTGG	1	3	empirical	CYB5R4_+_84569590.23-P1P2	GCAGCGAGGGGAGAGACTCA	2	4	empirical	CYB5R4_-_84569464.23-P1P2|CYB5R4_+_84569590.23-P1P2
KIF22	P1	nonessential	KIF22_-_29802125.23-P1	GCAGAGGCGACGCGAGATGG	1	1	predicted	KIF22_-_29802109.23-P1	GGGGCGGCTCGACGCAGCAG	2	2	predicted	KIF22_-_29802125.23-P1|KIF22_-_29802109.23-P1
INA	P1P2	nonessential	INA_+_105036909.23-P1P2	GGAGCTACAGAAGAAAGGAG	1	1	predicted	INA_+_105036966.23-P1P2	GTGCTCCGAGCCGAAGCTCA	2	2	predicted	INA_+_105036909.23-P1P2|INA_+_105036966.23-P1P2
F8A3	ENST00000369445.2	significant	F8A3_-_154687832.23-ENST00000369445.2	GGGCGGCCAGCTCGAGGCAG	1	5	empirical	F8A3_-_154687826.23-ENST00000369445.2	GCAGGGCGGCGGCCAGCTCG	2	1	empirical	F8A3_-_154687832.23-ENST00000369445.2|F8A3_-_154687826.23-ENST00000369445.2
SUPV3L1	P1P2	essential	SUPV3L1_+_70940042.23-P1P2	GGCACGGGAGAAGGACATCG	1	1	essential	SUPV3L1_+_70940020.23-P1P2	GCCGCAGGTTCTACACTGTC	2	2	essential	SUPV3L1_+_70940042.23-P1P2|SUPV3L1_+_70940020.23-P1P2
GLOD4	P1P2	nonessential	GLOD4_+_685491.23-P1P2	GCTGCGTGCGGCGGGAATCA	1	1	predicted	GLOD4_+_685513.23-P1P2	GGGCTGTACGGTGCGCGTGA	2	2	predicted	GLOD4_+_685491.23-P1P2|GLOD4_+_685513.23-P1P2
NEDD8-MDP1	P1P2	significant	NEDD8-MDP1_+_24701539.23-P1P2	GTGCAGGCAAGAGTGCTGGA	1	4	empirical	NEDD8-MDP1_+_24701514.23-P1P2	GCAGCGGCGACCGGAGCGGT	2	3	empirical	NEDD8-MDP1_+_24701539.23-P1P2|NEDD8-MDP1_+_24701514.23-P1P2
LSG1	P1P2	significant	LSG1_-_194392885.23-P1P2	GACCGGCCGGGGCTCTCCTC	1	2	empirical	LSG1_+_194392901.23-P1P2	GGCCGGGAAGCTTCGTCCAG	2	3	empirical	LSG1_-_194392885.23-P1P2|LSG1_+_194392901.23-P1P2
C5	P1P2	nonessential	C5_+_123812471.23-P1P2	GTCTTCCTGGGGAAAACCTG	1	1	predicted	C5_-_123812529.23-P1P2	GTTCCCAAAAGGCCCATGGT	2	2	predicted	C5_+_123812471.23-P1P2|C5_-_123812529.23-P1P2
DIRAS3	P1P2	nonessential	DIRAS3_-_68516294.23-P1P2	GCTGCTCGGAGAGACTGCCG	1	1	predicted	DIRAS3_+_68516289.23-P1P2	GGGTGTCCAGTTGGTTGCCG	2	2	predicted	DIRAS3_-_68516294.23-P1P2|DIRAS3_+_68516289.23-P1P2
C7orf55	P1P2	nonessential	C7orf55_-_139025263.23-P1P2	GAGCATCGGTGCAGTTTCGA	1	1	predicted	C7orf55_-_139025249.23-P1P2	GCGTTCAACGTCCGGAGCAT	2	2	predicted	C7orf55_-_139025263.23-P1P2|C7orf55_-_139025249.23-P1P2
LRRIQ1	P1P2	nonessential	LRRIQ1_-_85430185.23-P1P2	GAAGGAATCTCGCTGCTGAG	1	1	predicted	LRRIQ1_-_85430208.23-P1P2	GGAGCCGGGGTCTTAAGACT	2	2	predicted	LRRIQ1_-_85430185.23-P1P2|LRRIQ1_-_85430208.23-P1P2
C1QL2	P1P2	nonessential	C1QL2_+_119916267.23-P1P2	GGGAGCCCCACTAAACCCAG	1	1	predicted	C1QL2_-_119916284.23-P1P2	GCGCTCCGCTGGGTTTAGTG	2	2	predicted	C1QL2_+_119916267.23-P1P2|C1QL2_-_119916284.23-P1P2
MAP3K7CL	P1	nonessential	MAP3K7CL_+_30517946.23-P1	GCTACCAGCCAGAAGTTTCA	1	1	predicted	MAP3K7CL_-_30517921.23-P1	GCACACCACACATCAACTTG	2	2	predicted	MAP3K7CL_+_30517946.23-P1|MAP3K7CL_-_30517921.23-P1
RDH16	P1P2	nonessential	RDH16_+_57351385.23-P1P2	GAGAAAGGCAGTCATCAGGG	1	1	predicted	RDH16_-_57351372.23-P1P2	GGCCCTCAGGCATTTTGGCA	2	2	predicted	RDH16_+_57351385.23-P1P2|RDH16_-_57351372.23-P1P2
SPANXB1	ENST00000370530.1	nonessential	SPANXB1_-_140096953.23-ENST00000370530.1	GgccaatgaggccaacAAGA	1	1	predicted	SPANXB1_+_140096830.23-ENST00000370530.1	GGTTCTTCGATGTCTACAGT	2	2	predicted	SPANXB1_-_140096953.23-ENST00000370530.1|SPANXB1_+_140096830.23-ENST00000370530.1
IFI27	P1P2	nonessential	IFI27_-_94577285.23-P1P2	GTCATCAGGGAGCCTCAGAT	1	1	predicted	IFI27_+_94578101.23-P1P2	GTCACCCAGGGGCAAAACTA	2	2	predicted	IFI27_-_94577285.23-P1P2|IFI27_+_94578101.23-P1P2
C1orf216	P1P2	nonessential	C1orf216_-_36184421.23-P1P2	GGTCTCCGCGGTCCAGGCGT	1	1	predicted	C1orf216_+_36184449.23-P1P2	GACTCCGCAGTCCGGGACTG	2	2	predicted	C1orf216_-_36184421.23-P1P2|C1orf216_+_36184449.23-P1P2
GNAI2	P1P2	nonessential	GNAI2_+_50273650.23-P1P2	GCTGCGGGAAGCACTCGGGT	1	1	predicted	GNAI2_+_50273655.23-P1P2	GGCCCTCTGCGGGAAGCACT	2	2	predicted	GNAI2_+_50273650.23-P1P2|GNAI2_+_50273655.23-P1P2
RPS3	P2	essential	RPS3_+_75111893.23-P2	GTAGCATTTATAACAATTAT	1	2	empirical	RPS3_-_75111920.23-P2	GATTGTTATAAATGCTAAGT	2	4	empirical	RPS3_+_75111893.23-P2|RPS3_-_75111920.23-P2
MTFMT	P1P2	significant	MTFMT_+_65321944.23-P1P2	GCCGGCGGCCGAGGCGATGA	1	8	empirical	MTFMT_+_65321938.23-P1P2	GGCCGAGGCGATGAGGGTGT	2	6	empirical	MTFMT_+_65321944.23-P1P2|MTFMT_+_65321938.23-P1P2
RBM8A	P1P2	essential	RBM8A_-_145507619.23-P1P2	GCCTCTGCGACAGTTTCCCG	1	2	essential	RBM8A_+_145507591.23-P1P2	GAAACTGTCGCAGAGGGGAA	2	3	essential	RBM8A_-_145507619.23-P1P2|RBM8A_+_145507591.23-P1P2
MIA3	P2	nonessential	MIA3_+_222817716.23-P2	GGGAAAGGCCCCAATTCAGG	1	1	predicted	MIA3_+_222817705.23-P2	GAATTCAGGGGGCGGACTCT	2	2	predicted	MIA3_+_222817716.23-P2|MIA3_+_222817705.23-P2
MMP14	P1P2	nonessential	MMP14_+_23305876.23-P1P2	GTGTCGGCTTGGAGTTAAAG	1	1	predicted	MMP14_+_23306065.23-P1P2	GCGGTGCCGAGCGTGAGCAG	2	2	predicted	MMP14_+_23305876.23-P1P2|MMP14_+_23306065.23-P1P2
RNF135	P1P2	nonessential	RNF135_+_29298116.23-P1P2	GTCGGCCAGCCACACGGGAA	1	1	predicted	RNF135_+_29298113.23-P1P2	GGCCAGCCACACGGGAACGG	2	2	predicted	RNF135_+_29298116.23-P1P2|RNF135_+_29298113.23-P1P2
NFKBIL1	P1P2	nonessential	NFKBIL1_+_31515422.23-P1P2	GCCCCAGAGCCGTAGGCCCA	2	2	predicted	NFKBIL1_-_31515456.23-P1P2	GGCTCTGGGGGTACTTGGGG	3	3	predicted	NFKBIL1_+_31515422.23-P1P2|NFKBIL1_-_31515456.23-P1P2
CCDC3	P1P2	significant	CCDC3_+_13043685.23-P1P2	GAGCCCCGTGGCGGAGACAG	1	3	empirical	CCDC3_-_13043238.23-P1P2	GTAGTCCTGGACCACGGTGT	2	6	empirical	CCDC3_+_13043685.23-P1P2|CCDC3_-_13043238.23-P1P2
PROCR	P1P2	nonessential	PROCR_-_33759941.23-P1P2	GCGAGCCAGGAACCCAGGTC	1	1	predicted	PROCR_+_33759844.23-P1P2	GTCTGGGAGGGGCGGAGTCT	2	2	predicted	PROCR_-_33759941.23-P1P2|PROCR_+_33759844.23-P1P2
C4orf29	P1P2	nonessential	C4orf29_+_128886636.23-P1P2	GCAGCTCCGGTAACCTTTCC	1	1	predicted	C4orf29_+_128886728.23-P1P2	GTGGAAGCCTGCGATCGAGC	2	2	predicted	C4orf29_+_128886636.23-P1P2|C4orf29_+_128886728.23-P1P2
TRUB2	P1P2	nonessential	TRUB2_-_131084721.23-P1P2	GAGCACCCGCTGGACCTGGA	1	1	predicted	TRUB2_+_131084471.23-P1P2	GTCACGTGACCTATTCACCT	2	2	predicted	TRUB2_-_131084721.23-P1P2|TRUB2_+_131084471.23-P1P2
TXNL1	P1P2	nonessential	TXNL1_+_54305637.23-P1P2	GAAGCCCGTCGGGAGCGACC	1	1	predicted	TXNL1_+_54305794.23-P1P2	GGTCCCGGGAGAAGACTCGG	2	2	predicted	TXNL1_+_54305637.23-P1P2|TXNL1_+_54305794.23-P1P2
UHRF2	P1P2	nonessential	UHRF2_-_6413588.23-P1P2	GGGAGCTGCGCGAGCGGGTG	1	1	predicted	UHRF2_+_6413352.23-P1P2	GGCGCGCCCACCGGACCGAC	2	2	predicted	UHRF2_-_6413588.23-P1P2|UHRF2_+_6413352.23-P1P2
CDYL2	P1P2	nonessential	CDYL2_-_80838428.23-P1P2	Gcggtggctgcagccggcaa	1	1	predicted	CDYL2_+_80838472.23-P1P2	Ggtggcagcagcgtccgggc	2	2	predicted	CDYL2_-_80838428.23-P1P2|CDYL2_+_80838472.23-P1P2
C1QTNF7	ENST00000429690.1	nonessential	C1QTNF7_+_15376210.23-ENST00000429690.1	GTCTCCCAGGCTTTGAGCGG	1	1	predicted	C1QTNF7_+_15376213.23-ENST00000429690.1	GCGTTCTCCCAGGCTTTGAG	2	2	predicted	C1QTNF7_+_15376210.23-ENST00000429690.1|C1QTNF7_+_15376213.23-ENST00000429690.1
CFHR3	P1P2	nonessential	CFHR3_-_196744442.23-P1P2	Ggtaatacaaggggaacatt	1	1	predicted	CFHR3_+_196743893.23-P1P2	GGTGCACTACCATGAAGCTA	2	2	predicted	CFHR3_-_196744442.23-P1P2|CFHR3_+_196743893.23-P1P2
MRPL33	P1P2	essential	MRPL33_-_27994633.23-P1P2	GCCGGTGACGGAGACTGCCC	1	2	essential	MRPL33_-_27994638.23-P1P2	GGACGGAGACTGCCCAGGTG	2	5	essential	MRPL33_-_27994633.23-P1P2|MRPL33_-_27994638.23-P1P2
BANP	P1P2	significant	BANP_+_87985113.23-P1P2	GGGAGCTGCAATTACCGTGT	1	1	empirical	BANP_+_87985096.23-P1P2	GGTGGGCTGCGGAATTCTCG	2	3	empirical	BANP_+_87985113.23-P1P2|BANP_+_87985096.23-P1P2
CFDP1	P1	significant	CFDP1_+_75467325.23-P1	GCGCCGCCGCCGGGGCTCTA	1	6	empirical	CFDP1_-_75467319.23-P1	GCTCCAACGGCAAAGCTCTA	2	4	empirical	CFDP1_+_75467325.23-P1|CFDP1_-_75467319.23-P1
TICAM1	P1P2	nonessential	TICAM1_-_4831517.23-P1P2	GCCGCACCGGGGCCCTAAGA	1	1	predicted	TICAM1_+_4831695.23-P1P2	GTCAGCGCGCTACGGTCCGC	2	2	predicted	TICAM1_-_4831517.23-P1P2|TICAM1_+_4831695.23-P1P2
SPCS3	P1	significant	SPCS3_+_177241168.23-P1	GACCCAGGCTCCCGTTCCGG	1	3	empirical	SPCS3_+_177241171.23-P1	GCACACCCAGGCTCCCGTTC	2	2	empirical	SPCS3_+_177241168.23-P1|SPCS3_+_177241171.23-P1
HSPA6	P1P2	nonessential	HSPA6_+_161494136.23-P1P2	GAGAAGGTTCGGGCAGATCG	1	1	predicted	HSPA6_-_161493771.23-P1P2	GTATCTCTGGCCATTCACTA	2	2	predicted	HSPA6_+_161494136.23-P1P2|HSPA6_-_161493771.23-P1P2
KPNB1	P1P2	significant	KPNB1_+_45727288.23-P1P2	GGAGTGAGAGGCGGCGCGCa	1	1	empirical	KPNB1_+_45727339.23-P1P2	GGAGCGCGCTGGTGCTCGGG	2	5	empirical	KPNB1_+_45727288.23-P1P2|KPNB1_+_45727339.23-P1P2
LOC728819	P1P2	nonessential	LOC728819_-_43903496.23-P1P2	GGACAGTGTGCCAGGGTCAA	1	1	predicted	LOC728819_+_43903527.23-P1P2	GCGCAGCCGCCAGCTCCGGA	2	2	predicted	LOC728819_-_43903496.23-P1P2|LOC728819_+_43903527.23-P1P2
MBP	P1P2	nonessential	MBP_+_74728934.23-P1P2	GACAGAAGAGACCCTCCCAG	1	1	predicted	MBP_-_74728945.23-P1P2	GTGGATCCGTGCCTCTGGGA	2	2	predicted	MBP_+_74728934.23-P1P2|MBP_-_74728945.23-P1P2
FBXW2	P1P2	nonessential	FBXW2_-_123555673.23-P1P2	GCCGGTCCGCAGCCTCACAG	1	1	predicted	FBXW2_+_123555614.23-P1P2	GTCCGGGTCTGTATGCGAGG	2	2	predicted	FBXW2_-_123555673.23-P1P2|FBXW2_+_123555614.23-P1P2
SLC22A10	P1P2	nonessential	SLC22A10_-_63057461.23-P1P2	GCCTGATAGCAAAAGAACTG	1	1	predicted	SLC22A10_+_63057471.23-P1P2	GCAGTGCAATACAGCCGTAG	2	2	predicted	SLC22A10_-_63057461.23-P1P2|SLC22A10_+_63057471.23-P1P2
POLN	P1P2	significant	POLN_-_2243782.23-P1P2	GGGCCCGCGTCAGTCACCTC	1	1	empirical	POLN_+_2243788.23-P1P2	GGGCTCCTGCGAGAAGCAAG	2	3	empirical	POLN_-_2243782.23-P1P2|POLN_+_2243788.23-P1P2
FAM96B	P1P2	significant	FAM96B_+_66968280.23-P1P2	GGCACGCCTGCTAGGATCAG	1	1	empirical	FAM96B_+_66968274.23-P1P2	GCTGCTAGGATCAGCGGTGG	2	8	empirical	FAM96B_+_66968280.23-P1P2|FAM96B_+_66968274.23-P1P2
TYSND1	P1P2	significant	TYSND1_+_71906402.23-P1P2	GGCTTCAGCCGGACCGGGTA	1	1	predicted	TYSND1_-_71906416.23-P1P2	GCGAGGACCCCTACCCGGTC	2	2	predicted	TYSND1_+_71906402.23-P1P2|TYSND1_-_71906416.23-P1P2
ENPP3	P1	nonessential	ENPP3_-_131958476.23-P1	GTGCCAGACTAGACTAAAGA	1	1	predicted	ENPP3_+_131958457.23-P1	GCTCCTTCTTTAGTCTAGTC	2	2	predicted	ENPP3_-_131958476.23-P1|ENPP3_+_131958457.23-P1
HCAR3	P1P2	nonessential	HCAR3_-_123201356.23-P1P2	GAAAGTGGCGTGTGTCTGTA	1	1	predicted	HCAR3_-_123201043.23-P1P2	GCATAGTAGTCCATCACGAA	2	2	predicted	HCAR3_-_123201356.23-P1P2|HCAR3_-_123201043.23-P1P2
SIGLEC5	P1P2	nonessential	SIGLEC5_+_52150374.23-P1P2	GCCCGAGGCCCTGACTCCCA	1	1	predicted	SIGLEC5_+_52150290.23-P1P2	GTATGGGACCTGGTGACCTC	2	2	predicted	SIGLEC5_+_52150374.23-P1P2|SIGLEC5_+_52150290.23-P1P2
ING2	P1P2	nonessential	ING2_-_184426235.23-P1P2	GGCGGCCGTGCCCTCTCGAG	1	1	predicted	ING2_+_184426223.23-P1P2	GACCCCGCAGCCGCTCGAGA	2	2	predicted	ING2_-_184426235.23-P1P2|ING2_+_184426223.23-P1P2
TMC6	P1P2	nonessential	TMC6_-_76124770.23-P1P2	GCAAGAGCCGCCGGGAACTG	1	1	predicted	TMC6_-_76124812.23-P1P2	GGGAGTGGCAAAGGGCCCCA	2	2	predicted	TMC6_-_76124770.23-P1P2|TMC6_-_76124812.23-P1P2
MSANTD2	P1P2	nonessential	MSANTD2_-_124670266.23-P1P2	GCGGGCAGCTCCGAGCCACA	1	1	predicted	MSANTD2_+_124670272.23-P1P2	GGCGGCGGCCGCTTGGAAGA	2	2	predicted	MSANTD2_-_124670266.23-P1P2|MSANTD2_+_124670272.23-P1P2
PLEKHG6	P1P2	nonessential	PLEKHG6_-_6419904.23-P1P2	GGCCGCTCGATCCCAGTCCC	1	1	predicted	PLEKHG6_+_6419884.23-P1P2	GGCCTGGGACTGGGATCGAG	2	2	predicted	PLEKHG6_-_6419904.23-P1P2|PLEKHG6_+_6419884.23-P1P2
C20orf26	P1P2	significant	C20orf26_+_20033245.23-P1P2	GGCGTCGCTGCTAGTCAGCA	1	2	empirical	C20orf26_-_20033213.23-P1P2	GTGCGGCAGCGCGTGGAGTG	2	3	empirical	C20orf26_+_20033245.23-P1P2|C20orf26_-_20033213.23-P1P2
MAGEC1	P1P2	nonessential	MAGEC1_+_140992639.23-P1P2	GGCCAGGTCTGCCCTGTTTC	1	1	predicted	MAGEC1_-_140991912.23-P1P2	GTGTCCTCACGGCAGAAGAA	2	2	predicted	MAGEC1_+_140992639.23-P1P2|MAGEC1_-_140991912.23-P1P2
HMGB1	P2	nonessential	HMGB1_-_31191681.23-P2	GACCACGCTCGCGCGGACCA	1	1	predicted	HMGB1_-_31191644.23-P2	GCACCTCCGCGGGTCACCCC	2	2	predicted	HMGB1_-_31191681.23-P2|HMGB1_-_31191644.23-P2
ALG8	P1P2	nonessential	ALG8_+_77850627.23-P1P2	GTGCGGTGCCGCAGCAATGG	1	1	predicted	ALG8_-_77850641.23-P1P2	GGTGAGCGCCGCCATTGCTG	2	2	predicted	ALG8_+_77850627.23-P1P2|ALG8_-_77850641.23-P1P2
ACBD5	P1P2	nonessential	ACBD5_+_27529701.23-P1P2	GCGGACTCCGGCGGAATGGG	1	1	predicted	ACBD5_+_27529710.23-P1P2	GACTGACAGACGGACTCCGG	2	2	predicted	ACBD5_+_27529701.23-P1P2|ACBD5_+_27529710.23-P1P2
CLDN9	P1P2	nonessential	CLDN9_-_3062934.23-P1P2	GGAGAGCCCGCAGAGTCCCC	2	2	predicted	CLDN9_-_3062960.23-P1P2	GACTGTCAGAGTCGCTCAGT	3	3	predicted	CLDN9_-_3062934.23-P1P2|CLDN9_-_3062960.23-P1P2
BTLA	P1P2	nonessential	BTLA_-_112218302.23-P1P2	GGTCAGTTTACCTACCCCAG	1	1	predicted	BTLA_-_112217925.23-P1P2	GTGATGCGATGCCTATGATT	2	2	predicted	BTLA_-_112218302.23-P1P2|BTLA_-_112217925.23-P1P2
F13B	P1P2	nonessential	F13B_+_197036347.23-P1P2	GAAGCACACCACTGAAGATG	1	1	predicted	F13B_-_197036338.23-P1P2	GCAATATGATGATAAAAGTC	2	2	predicted	F13B_+_197036347.23-P1P2|F13B_-_197036338.23-P1P2
TRIM29	P1	nonessential	TRIM29_-_120008800.23-P1	GTCAGGATAGGTGACCTTTC	2	2	predicted	TRIM29_-_120008812.23-P1	GACCTTTCTGGCAGGCGTCT	3	3	predicted	TRIM29_-_120008800.23-P1|TRIM29_-_120008812.23-P1
BMP1	P1P2	nonessential	BMP1_+_22022981.23-P1P2	GTGTAGTCGGCCAAGTCCAG	1	1	predicted	BMP1_+_22022879.23-P1P2	GGAGGGAAGCGGCGCACTGG	2	2	predicted	BMP1_+_22022981.23-P1P2|BMP1_+_22022879.23-P1P2
CLCF1	P1P2	nonessential	CLCF1_+_67141107.23-P1P2	GAACCTGCGAGTGGGCCTGG	1	1	predicted	CLCF1_+_67141102.23-P1P2	GGCGAGTGGGCCTGGCGGAT	2	2	predicted	CLCF1_+_67141107.23-P1P2|CLCF1_+_67141102.23-P1P2
GPR137	P2	nonessential	GPR137_-_64053386.23-P2	GGAGCCGGCTCTCCCATCAG	1	1	predicted	GPR137_+_64053412.23-P2	GCGCTCCAGCCTCAAGGGGA	2	2	predicted	GPR137_-_64053386.23-P2|GPR137_+_64053412.23-P2
ZNF684	P1P2	nonessential	ZNF684_-_40997369.23-P1P2	GTCAGCGCCGCGGGAAGTGC	1	1	predicted	ZNF684_+_40997354.23-P1P2	GCACCCGCCCGCACTTCCCG	2	2	predicted	ZNF684_-_40997369.23-P1P2|ZNF684_+_40997354.23-P1P2
ERMAP	P2	nonessential	ERMAP_+_43291280.23-P2	GCAGGAAGGCCTAGGGATGT	1	1	predicted	ERMAP_-_43291229.23-P2	GCGAGAAGGGAGTTCTGTGG	2	2	predicted	ERMAP_+_43291280.23-P2|ERMAP_-_43291229.23-P2
ZNF718	ENST00000502662.1	nonessential	ZNF718_-_154794.23-ENST00000502662.1	GCAAAAGGACATGAGAAACG	1	1	predicted	ZNF718_-_154974.23-ENST00000502662.1	GAAGATAAGATAAGATATAC	2	2	predicted	ZNF718_-_154794.23-ENST00000502662.1|ZNF718_-_154974.23-ENST00000502662.1
GOT1L1	P1P2	nonessential	GOT1L1_+_37797643.23-P1P2	GCTGCCAAGGTTCCAGGAAG	1	1	predicted	GOT1L1_+_37797587.23-P1P2	GCTGGGCAGAAGCGGAACAC	2	2	predicted	GOT1L1_+_37797643.23-P1P2|GOT1L1_+_37797587.23-P1P2
SCIMP	P1P2	nonessential	SCIMP_+_5138138.23-P1P2	GGGCTCACTGTCTCTAGCAG	1	1	predicted	SCIMP_-_5137939.23-P1P2	GctgGCCCAGTGCTGATCGG	2	2	predicted	SCIMP_+_5138138.23-P1P2|SCIMP_-_5137939.23-P1P2
C17orf49	P1	essential	C17orf49_+_6915949.23-P1	GAGCGGGCTCGGAAAGCGGT	1	7	essential	C17orf49_+_6915965.23-P1	GGGATCGCCGAGGTGCAAGC	2	6	essential	C17orf49_+_6915949.23-P1|C17orf49_+_6915965.23-P1
TMEM132A	P1P2	nonessential	TMEM132A_-_60691954.23-P1P2	GTGCTCCCGCTCCATTGTCT	1	1	predicted	TMEM132A_+_60691943.23-P1P2	GGGCTGCAATTCCCAGACAA	2	2	predicted	TMEM132A_-_60691954.23-P1P2|TMEM132A_+_60691943.23-P1P2
TCF3	P1P2	significant	TCF3_+_1652583.23-P1P2	GCTCCCGCCGCAGGAAGATG	1	1	empirical	TCF3_+_1652574.23-P1P2	GCAGGAAGATGAGGCAGCGG	2	3	empirical	TCF3_+_1652583.23-P1P2|TCF3_+_1652574.23-P1P2
ANPEP	P1	nonessential	ANPEP_+_90358037.23-P1	GCGCAGCTCGGAACCCGCCA	1	1	predicted	ANPEP_-_90358028.23-P1	GGCCGCCGGGCGCTGGAACC	2	2	predicted	ANPEP_+_90358037.23-P1|ANPEP_-_90358028.23-P1
BRICD5	P1P2	nonessential	BRICD5_+_2260841.23-P1P2	GATCGGCACATTGTGAGCAG	1	1	predicted	BRICD5_-_2260791.23-P1P2	GGGGAGGCACTCACCCCTGT	2	2	predicted	BRICD5_+_2260841.23-P1P2|BRICD5_-_2260791.23-P1P2
IRGC	P1P2	nonessential	IRGC_+_44220301.23-P1P2	GGCCCAGCGAGAGAGCCCTG	1	1	predicted	IRGC_-_44220270.23-P1P2	GATCAGTGGGGAGAGTGTGA	2	2	predicted	IRGC_+_44220301.23-P1P2|IRGC_-_44220270.23-P1P2
KIAA0226L	P1P2	nonessential	KIAA0226L_+_46961322.23-P1P2	GGCCCGGAGCCGCGCGAGGG	1	1	predicted	KIAA0226L_+_46961350.23-P1P2	GACCGGGAGCGCGGTGGCCA	2	2	predicted	KIAA0226L_+_46961322.23-P1P2|KIAA0226L_+_46961350.23-P1P2
HYAL2	P2	nonessential	HYAL2_+_50360140.23-P2	GGCAAGTAGCCTAGCTGGAG	1	1	predicted	HYAL2_-_50360114.23-P2	GGTCCGTCGGCCCAGTAGGT	2	2	predicted	HYAL2_+_50360140.23-P2|HYAL2_-_50360114.23-P2
KIF20B	P1P2	significant	KIF20B_+_91461330.23-P1P2	GCGCACTGAACGCTGGGAGT	1	8	empirical	KIF20B_+_91461327.23-P1P2	GACTGAACGCTGGGAGTAGG	2	1	empirical	KIF20B_+_91461330.23-P1P2|KIF20B_+_91461327.23-P1P2
FAM187B	P1P2	nonessential	FAM187B_-_35719545.23-P1P2	GAAGTAGAACCCCAGTGCCG	1	1	predicted	FAM187B_-_35719511.23-P1P2	GTTGGCACTGCTTACCACTG	2	2	predicted	FAM187B_-_35719545.23-P1P2|FAM187B_-_35719511.23-P1P2
ERMARD	P1P2	nonessential	ERMARD_-_170151764.23-P1P2	GACCGGAAGTTATGGAGGTA	1	1	predicted	ERMARD_-_170151808.23-P1P2	GCCCGAGCTAGGCAGGGAGT	2	2	predicted	ERMARD_-_170151764.23-P1P2|ERMARD_-_170151808.23-P1P2
OR52N5	ENST00000317093.2	nonessential	OR52N5_-_5799833.23-ENST00000317093.2	GGAGGAGTCACATGAATTGT	1	1	predicted	OR52N5_-_5799757.23-ENST00000317093.2	GTACATTGTGCAGAGTGGGA	2	2	predicted	OR52N5_-_5799833.23-ENST00000317093.2|OR52N5_-_5799757.23-ENST00000317093.2
DYNC1H1	P1P2	essential	DYNC1H1_+_102430877.23-P1P2	GGGAGCCGGCTCCGCCCTAA	1	2	essential	DYNC1H1_+_102430905.23-P1P2	GGCTAGCCCACCGCAGACTG	2	7	essential	DYNC1H1_+_102430877.23-P1P2|DYNC1H1_+_102430905.23-P1P2
MAP3K2	P1P2	significant	MAP3K2_+_128145501.23-P1P2	GGGCTGCCTGCCCTCAGCGG	1	2	empirical	MAP3K2_-_128145498.23-P1P2	GCGGCCGCGGCACCCTCGTC	2	4	empirical	MAP3K2_+_128145501.23-P1P2|MAP3K2_-_128145498.23-P1P2
SLC25A16	P1P2	nonessential	SLC25A16_-_70287207.23-P1P2	GGGACCATAGCCGGAACAGG	1	1	predicted	SLC25A16_-_70287214.23-P1P2	GAGCCGGAACAGGCGGTGAC	2	2	predicted	SLC25A16_-_70287207.23-P1P2|SLC25A16_-_70287214.23-P1P2
TPK1	P1P2	significant	TPK1_-_144533096.23-P1P2	GGCCACAGACTGGAGATCGC	1	5	empirical	TPK1_+_144532960.23-P1P2	GATGGGTTCGCGGAGAGAGG	2	9	empirical	TPK1_-_144533096.23-P1P2|TPK1_+_144532960.23-P1P2
ZNF586	P1P2	nonessential	ZNF586_-_58281095.23-P1P2	GTGGACGAGCTCGGGAGGAG	1	1	predicted	ZNF586_-_58281090.23-P1P2	GGGGTCTGGACGAGCTCGGG	2	2	predicted	ZNF586_-_58281095.23-P1P2|ZNF586_-_58281090.23-P1P2
MYO3A	P1P2	nonessential	MYO3A_+_26223188.23-P1P2	GCTACGGGCGCTCCCTCGAG	1	1	predicted	MYO3A_-_26223237.23-P1P2	GCCCCCGTAAAGAAATAAGG	2	2	predicted	MYO3A_+_26223188.23-P1P2|MYO3A_-_26223237.23-P1P2
INTS9	P1P2	significant	INTS9_+_28747443.23-P1P2	GGCACCGGAAGACGCTTCCT	1	1	empirical	INTS9_-_28747461.23-P1P2	GAAACCCAGGAAGCGTCTTC	2	10	empirical	INTS9_+_28747443.23-P1P2|INTS9_-_28747461.23-P1P2
NR2C2AP	P1P2	significant	NR2C2AP_+_19314199.23-P1P2	GGGTTCCGGGTCCCAAGATT	1	2	empirical	NR2C2AP_-_19313951.23-P1P2	Ggcctcctcaagctacaggg	2	3	empirical	NR2C2AP_+_19314199.23-P1P2|NR2C2AP_-_19313951.23-P1P2
FAM110D	P1P2	nonessential	FAM110D_+_26485606.23-P1P2	GGGTACACTCACCTCTGCAT	1	1	predicted	FAM110D_+_26485564.23-P1P2	GTTGGGCAGGTCCAGACTGA	2	2	predicted	FAM110D_+_26485606.23-P1P2|FAM110D_+_26485564.23-P1P2
PARG	ENST00000402038.3	nonessential	PARG_-_51130357.23-ENST00000402038.3	GAGACACAGGGCCCATAAAC	1	1	predicted	PARG_-_51130247.23-ENST00000402038.3	GcctagtagaatgTCTCTAA	2	2	predicted	PARG_-_51130357.23-ENST00000402038.3|PARG_-_51130247.23-ENST00000402038.3
C21orf58	P2	nonessential	C21orf58_+_47738037.23-P2	GCGAGTAACAGAACCAGGGA	2	2	predicted	C21orf58_-_47737990.23-P2	GCTGATGAGTCCAGCATGGT	3	3	predicted	C21orf58_+_47738037.23-P2|C21orf58_-_47737990.23-P2
KLHL1	P1P2	nonessential	KLHL1_-_70682537.23-P1P2	GTATTCTAGCGCATATAGGG	1	1	predicted	KLHL1_+_70682367.23-P1P2	GGCAGGTGCACCAAGAGATC	2	2	predicted	KLHL1_-_70682537.23-P1P2|KLHL1_+_70682367.23-P1P2
SORD	P1P2	significant	SORD_-_45315717.23-P1P2	GGTGTGGGGGCAGCAGGTAG	1	3	empirical	SORD_+_45315749.23-P1P2	GCACGGGGCTAGGTTCCGGG	2	2	empirical	SORD_-_45315717.23-P1P2|SORD_+_45315749.23-P1P2
OR6N2	ENST00000339258.1	nonessential	OR6N2_+_158747352.23-ENST00000339258.1	GGCCAGTGTGGGCTATGTCA	1	1	predicted	OR6N2_-_158747383.23-ENST00000339258.1	GGCCCACACTGGCAAAGCCA	2	2	predicted	OR6N2_+_158747352.23-ENST00000339258.1|OR6N2_-_158747383.23-ENST00000339258.1
OR4C45	NM_001005513	nonessential	OR4C45_-_48373913.23-NM_001005513	GCCTGCCAATGTGATCAAGT	1	1	predicted	OR4C45_-_48373742.23-NM_001005513	GATGCAGCCATTGAAGGATA	2	2	predicted	OR4C45_-_48373913.23-NM_001005513|OR4C45_-_48373742.23-NM_001005513
WNT3	P1P2	significant	WNT3_-_44896031.23-P1P2	GGAGCGACGCCCCCAATAGT	1	1	predicted	WNT3_-_44896010.23-P1P2	GGCCCGCGACCATGAAGAGG	2	2	predicted	WNT3_-_44896031.23-P1P2|WNT3_-_44896010.23-P1P2
B3GNT2	P1P2	nonessential	B3GNT2_-_62423270.23-P1P2	GAGCCTGGAGTGAGGCGCAG	1	1	predicted	B3GNT2_-_62423301.23-P1P2	GCAGCGGCAACAAGTGCCGG	2	2	predicted	B3GNT2_-_62423270.23-P1P2|B3GNT2_-_62423301.23-P1P2
ARL1	P1P2	significant	ARL1_+_101801468.23-P1P2	GGCCTCGGAGCTGCAGCCGA	1	1	empirical	ARL1_+_101801462.23-P1P2	GGAGCTGCAGCCGAAGGCCA	2	3	empirical	ARL1_+_101801468.23-P1P2|ARL1_+_101801462.23-P1P2
OR2S2	ENST00000341959.2	nonessential	OR2S2_-_35958084.23-ENST00000341959.2	GATCACAGGGGAGGTCTCAT	1	1	predicted	OR2S2_+_35958091.23-ENST00000341959.2	GTGGCAGAGGGGATATCACA	2	2	predicted	OR2S2_-_35958084.23-ENST00000341959.2|OR2S2_+_35958091.23-ENST00000341959.2
MYO1D	P1P2	nonessential	MYO1D_-_31204163.23-P1P2	GAGGGGCCGGGACACCGAGA	1	1	predicted	MYO1D_-_31204146.23-P1P2	GCGGCTGCCGGGCGCTGTAG	5	5	predicted	MYO1D_-_31204163.23-P1P2|MYO1D_-_31204146.23-P1P2
OR8G2P	ENST00000366149.3	nonessential	OR8G2P_+_124095413.23-ENST00000366149.3	GTTCCTTTGGTCAGTTTCTA	1	1	predicted	OR8G2P_+_124095656.23-ENST00000366149.3	GATTTTGGGGGTAATGATAG	2	2	predicted	OR8G2P_+_124095413.23-ENST00000366149.3|OR8G2P_+_124095656.23-ENST00000366149.3
DNAJC9	P1P2	significant	DNAJC9_-_75006969.23-P1P2	GCCGGGCGGAGATACGACCC	1	4	empirical	DNAJC9_+_75007004.23-P1P2	GGCGAAAAAGAAGCAGTCCT	2	6	empirical	DNAJC9_-_75006969.23-P1P2|DNAJC9_+_75007004.23-P1P2
RAPH1	P1P2	nonessential	RAPH1_-_204399815.23-P1P2	GCCCTACCCCCTGGCCCCGA	1	1	predicted	RAPH1_-_204399837.23-P1P2	GCGAGGCTAACCACTCACCG	2	2	predicted	RAPH1_-_204399815.23-P1P2|RAPH1_-_204399837.23-P1P2
ARMC1	P1P2	significant	ARMC1_-_66546391.23-P1P2	GTCAGGGAGCCAAAGAGCGA	1	1	predicted	ARMC1_+_66546422.23-P1P2	GCAGAGGCGTCAGGTCACCT	2	2	predicted	ARMC1_-_66546391.23-P1P2|ARMC1_+_66546422.23-P1P2
CCDC84	P1P2	essential	CCDC84_-_118868873.23-P1P2	GCCGCCGGATGGCGTAGGAT	1	2	essential	CCDC84_-_118868904.23-P1P2	GGTGGTGATACCGGGTACCC	2	4	essential	CCDC84_-_118868873.23-P1P2|CCDC84_-_118868904.23-P1P2
TFCP2	P1P2	nonessential	TFCP2_+_51566834.23-P1P2	GGGAAGGGCCTGGCGAGTCT	1	1	predicted	TFCP2_+_51566642.23-P1P2	GGAGAGAGCGAGACCTGGGA	2	2	predicted	TFCP2_+_51566834.23-P1P2|TFCP2_+_51566642.23-P1P2
IL7R	P1P2	nonessential	IL7R_-_35857248.23-P1P2	GTCCCTAACAGACCTGAGTC	1	1	predicted	IL7R_+_35857229.23-P1P2	GTGCCTGACTCAGGTCTGTT	2	2	predicted	IL7R_-_35857248.23-P1P2|IL7R_+_35857229.23-P1P2
PSMB6	P2	essential	PSMB6_+_4700842.23-P2	GCTGTGGAAACCGAGCTGGT	1	1	predicted	PSMB6_+_4700995.23-P2	GTGGCTGCTGTGTGGACCAG	2	2	predicted	PSMB6_+_4700842.23-P2|PSMB6_+_4700995.23-P2
FAM24B	P1P2	nonessential	FAM24B_+_124639032.23-P1P2	GACGCAGGCAGCATGGACCA	1	1	predicted	FAM24B_+_124639047.23-P1P2	GCGACGCTGGCGGTGGACGC	2	2	predicted	FAM24B_+_124639032.23-P1P2|FAM24B_+_124639047.23-P1P2
IL3RA	P1P2	nonessential	IL3RA_+_1455736.23-P1P2	GTCTGGGGTGTCCTGATCCT	1	1	predicted	IL3RA_-_1455915.23-P1P2	GATCCAAGCTGGCAGACACG	2	2	predicted	IL3RA_+_1455736.23-P1P2|IL3RA_-_1455915.23-P1P2
IPCEF1	P1P2	nonessential	IPCEF1_-_154568762.23-P1P2	GCTCCAGGCAGAGCTTAACG	1	1	predicted	IPCEF1_-_154568777.23-P1P2	GAACGGGGAGCTACTAGCTG	2	2	predicted	IPCEF1_-_154568762.23-P1P2|IPCEF1_-_154568777.23-P1P2
EPHA1	P1P2	nonessential	EPHA1_+_143105889.23-P1P2	GCCGGCCCGGAGCTATGGAG	1	1	predicted	EPHA1_-_143105934.23-P1P2	GCCTGGGACAGTGGCCCGGA	2	2	predicted	EPHA1_+_143105889.23-P1P2|EPHA1_-_143105934.23-P1P2
SNX30	P1P2	nonessential	SNX30_-_115513121.23-P1P2	GgAGCGGAGCGTCTGAGCGC	1	1	predicted	SNX30_-_115513065.23-P1P2	GCGTGCTGCCAGCGGAcccg	2	2	predicted	SNX30_-_115513121.23-P1P2|SNX30_-_115513065.23-P1P2
NRP2	P1P2	nonessential	NRP2_+_206547161.23-P1P2	GCATGTGGATGTCAGAGCCG	1	1	predicted	NRP2_+_206547409.23-P1P2	GGCCTCTCGAGGGGAGTCTG	2	2	predicted	NRP2_+_206547161.23-P1P2|NRP2_+_206547409.23-P1P2
C14orf180	P2	nonessential	C14orf180_+_105047648.23-P2	GGGCCACAGGCCTAACCCAA	1	1	predicted	C14orf180_+_105047608.23-P2	GAGGTTGTGCCTTCTTCCGG	2	2	predicted	C14orf180_+_105047648.23-P2|C14orf180_+_105047608.23-P2
ARMCX3	P1P2	nonessential	ARMCX3_+_100878194.23-P1P2	GGCAGGCCGGCCCGCCCTCA	1	1	predicted	ARMCX3_+_100878168.23-P1P2	GGGGGAGCTGGTACTCAGAC	2	2	predicted	ARMCX3_+_100878194.23-P1P2|ARMCX3_+_100878168.23-P1P2
TCTEX1D1	P1P2	nonessential	TCTEX1D1_-_67218189.23-P1P2	GCGCCGGCTGAATGAAGCCT	1	1	predicted	TCTEX1D1_+_67218124.23-P1P2	GACTCTGAGGCCGGTCTCCA	2	2	predicted	TCTEX1D1_-_67218189.23-P1P2|TCTEX1D1_+_67218124.23-P1P2
TSLP	P1P2	nonessential	TSLP_+_110409305.23-P1P2	GCCTGGGCACCAGATAGCTA	1	1	predicted	TSLP_+_110409194.23-P1P2	GCAATGTGGCTGCTCATAGG	2	2	predicted	TSLP_+_110409305.23-P1P2|TSLP_+_110409194.23-P1P2
TUBGCP4	P1P2	significant	TUBGCP4_-_43663451.23-P1P2	GCACAAACCGCCCGACCCAG	1	1	empirical	TUBGCP4_+_43663480.23-P1P2	GACCTCCAGGCGACCACGAG	2	7	empirical	TUBGCP4_-_43663451.23-P1P2|TUBGCP4_+_43663480.23-P1P2
ENDOV	P1P2	nonessential	ENDOV_-_78389210.23-P1P2	GGCGGAAGCGGAGGGATCTC	1	1	predicted	ENDOV_+_78389220.23-P1P2	GGAGAACCGCGCCCACCCCG	2	2	predicted	ENDOV_-_78389210.23-P1P2|ENDOV_+_78389220.23-P1P2
IL1RAP	P1P2	nonessential	IL1RAP_+_190231914.23-P1P2	GTCCGCGCCTCTGGCCAAAG	1	1	predicted	IL1RAP_+_190232294.23-P1P2	GGCGGTGAGGAGGAAAACAA	2	2	predicted	IL1RAP_+_190231914.23-P1P2|IL1RAP_+_190232294.23-P1P2
KBTBD12	P1P2	nonessential	KBTBD12_+_127634358.23-P1P2	GTGGCTTGGACGCTACCGTG	1	1	predicted	KBTBD12_+_127634377.23-P1P2	GCACTCGCTGGGCCACGACC	2	2	predicted	KBTBD12_+_127634358.23-P1P2|KBTBD12_+_127634377.23-P1P2
NEFM	P2	nonessential	NEFM_+_24774682.23-P2	GGCTTGGGAGCTTCCACCTT	1	1	predicted	NEFM_-_24774802.23-P2	GGCCCTGACAGCCATTACAG	2	2	predicted	NEFM_+_24774682.23-P2|NEFM_-_24774802.23-P2
SQLE	P1P2	significant	SQLE_+_126011191.23-P1P2	GGAGGGTCACAGAAACACCT	1	4	empirical	SQLE_-_126010804.23-P1P2	GACGGTTACTCTGGTTACTG	2	5	empirical	SQLE_+_126011191.23-P1P2|SQLE_-_126010804.23-P1P2
PRND	P1P2	nonessential	PRND_-_4702593.23-P1P2	GGTGCAGCTCGAGGCTCCAG	1	1	predicted	PRND_-_4702615.23-P1P2	GCACACTCCAGAGAGAGCCA	2	2	predicted	PRND_-_4702593.23-P1P2|PRND_-_4702615.23-P1P2
GNE	P1P2	essential	GNE_-_36258191.23-P1P2	GCGAGAGCCGGGTCCAGTGT	1	2	essential	GNE_+_36257940.23-P1P2	GCCTGGCAGGCGAGCTGTCC	2	8	essential	GNE_-_36258191.23-P1P2|GNE_+_36257940.23-P1P2
KIAA1217	ENST00000376454.3	significant	KIAA1217_-_24497913.23-ENST00000376454.3	GcCTAGGGACGGAGGGCCAG	1	1	predicted	KIAA1217_-_24498125.23-ENST00000376454.3	GTTGCGGCAGGCAGAGACAA	2	2	predicted	KIAA1217_-_24497913.23-ENST00000376454.3|KIAA1217_-_24498125.23-ENST00000376454.3
TOR3A	P1P2	nonessential	TOR3A_+_179051234.23-P1P2	GCCCGAGCTGCGGGACCATC	1	1	predicted	TOR3A_-_179051230.23-P1P2	GTAAGGGAGCCTGGCTAGGC	2	2	predicted	TOR3A_+_179051234.23-P1P2|TOR3A_-_179051230.23-P1P2
COL14A1	P1P2	nonessential	COL14A1_-_121137426.23-P1P2	GAGCGCAGCGGCagaaggag	1	1	predicted	COL14A1_-_121137513.23-P1P2	GGCCGCCAAGGACCAACTAG	2	2	predicted	COL14A1_-_121137426.23-P1P2|COL14A1_-_121137513.23-P1P2
ANKRD63	P1P2	nonessential	ANKRD63_+_40575241.23-P1P2	GGGAGCGGCGCGCCCCGCCA	1	1	predicted	ANKRD63_-_40575214.23-P1P2	GCGCTCCCCCGCAGCGACGG	2	2	predicted	ANKRD63_+_40575241.23-P1P2|ANKRD63_-_40575214.23-P1P2
FGFR1OP2	P1P2	significant	FGFR1OP2_-_27091437.23-P1P2	GGCCGGTCGGAGGCGGTCGG	1	6	empirical	FGFR1OP2_+_27091449.23-P1P2	GCGTTCAACGCCATCACCGG	2	1	empirical	FGFR1OP2_-_27091437.23-P1P2|FGFR1OP2_+_27091449.23-P1P2
TSFM	P1P2	significant	TSFM_-_58176641.23-P1P2	GGCGCGGACCGGGAGCTACC	1	1	empirical	TSFM_+_58176556.23-P1P2	GAGCCGCGATAAACACCCTC	2	9	empirical	TSFM_-_58176641.23-P1P2|TSFM_+_58176556.23-P1P2
WWTR1	P1P2	significant	WWTR1_-_149375769.23-P1P2	GCTAGTGCTGGGCGAAAAGG	1	1	empirical	WWTR1_-_149375758.23-P1P2	GGGCCTAAGGCGCTAGTGCT	2	2	empirical	WWTR1_-_149375769.23-P1P2|WWTR1_-_149375758.23-P1P2
CDH20	P1P2	nonessential	CDH20_+_59000736.23-P1P2	GTCCAGTGAGAAGAGCCCCC	1	1	predicted	CDH20_-_59000742.23-P1P2	GGGACGGTGACCGCGACCAG	2	2	predicted	CDH20_+_59000736.23-P1P2|CDH20_-_59000742.23-P1P2
CERK	P1P2	nonessential	CERK_+_47134030.23-P1P2	GGGCGGAGATGGGGGCGACG	1	1	predicted	CERK_-_47134133.23-P1P2	GGCCCCTGCAGTggcccggg	2	2	predicted	CERK_+_47134030.23-P1P2|CERK_-_47134133.23-P1P2
PIK3C2B	P1P2	nonessential	PIK3C2B_+_204463873.23-P1P2	GTGCCTGTCCAGGCAGGGTC	1	1	predicted	PIK3C2B_-_204463857.23-P1P2	GGGACACCCGGCGCACTGCA	2	2	predicted	PIK3C2B_+_204463873.23-P1P2|PIK3C2B_-_204463857.23-P1P2
PSPH	P2	essential	PSPH_-_56119277.23-P2	GAGCTCCAACGCCGGAACCA	1	1	essential	PSPH_-_56119164.23-P2	GGAACAAACCGCGAGATCAG	2	9	essential	PSPH_-_56119277.23-P2|PSPH_-_56119164.23-P2
SLC22A9	P1P2	nonessential	SLC22A9_+_63137330.23-P1P2	GAGTCGTTTTGGGGTCAGAT	1	1	predicted	SLC22A9_+_63137463.23-P1P2	GATCCAGAGAGGTTCAAAGA	2	2	predicted	SLC22A9_+_63137330.23-P1P2|SLC22A9_+_63137463.23-P1P2
TCP10L	P1	nonessential	TCP10L_+_33957780.23-P1	GAGGGCTTGGGGACAACTGT	1	1	predicted	TCP10L_+_33957753.23-P1	GGGCCCAGATGATCTGATCC	2	2	predicted	TCP10L_+_33957780.23-P1|TCP10L_+_33957753.23-P1
WDR35	P1P2	nonessential	WDR35_-_20189829.23-P1P2	GTAAGGCCCTCGACAAGTAA	1	1	predicted	WDR35_+_20189840.23-P1P2	GAGCTGCTGGTACTCCCGAT	2	2	predicted	WDR35_-_20189829.23-P1P2|WDR35_+_20189840.23-P1P2
RAB11B	P1P2	nonessential	RAB11B_+_8455192.23-P1P2	GCGGTTGAATGGCCTATCAG	1	1	predicted	RAB11B_-_8455303.23-P1P2	GGCCGGAAGCGCCAGGACAA	2	2	predicted	RAB11B_+_8455192.23-P1P2|RAB11B_-_8455303.23-P1P2
UBL5	P1P2	significant	UBL5_-_9938639.23-P1P2	GGGTGAGGAGCTGGTGGCGT	1	2	empirical	UBL5_+_9938801.23-P1P2	GCCCAGGGCCGCGAACCCCG	2	4	empirical	UBL5_-_9938639.23-P1P2|UBL5_+_9938801.23-P1P2
NFKBID	P2	nonessential	NFKBID_-_36389843.23-P2	GCCCTCCCGCGCGGAAAAAC	1	1	predicted	NFKBID_+_36389484.23-P2	GAGATCCGAGACAGACCCGG	2	2	predicted	NFKBID_-_36389843.23-P2|NFKBID_+_36389484.23-P2
CHRNA4	P1P2	significant	CHRNA4_+_61992566.23-P1P2	GGCGCGCACGGGCCTCGAAG	1	5	empirical	CHRNA4_-_61992667.23-P1P2	GTCTCCTGTGGggcgcggtg	2	6	empirical	CHRNA4_+_61992566.23-P1P2|CHRNA4_-_61992667.23-P1P2
C1orf123	P1P2	nonessential	C1orf123_+_53686240.23-P1P2	GGCGGAGAGGGCTACCATGG	1	1	predicted	C1orf123_+_53686261.23-P1P2	GAAGGGCCGCAGCCAGCACC	2	2	predicted	C1orf123_+_53686240.23-P1P2|C1orf123_+_53686261.23-P1P2
NUGGC	P1P2	nonessential	NUGGC_-_27941401.23-P1P2	GAGGTATTTGGAACCAGCTG	1	1	predicted	NUGGC_+_27941371.23-P1P2	GGTTCCAAATACCTGAACCA	2	2	predicted	NUGGC_-_27941401.23-P1P2|NUGGC_+_27941371.23-P1P2
MYADM	P1	nonessential	MYADM_+_54371151.23-P1	GGCTGAAGCAAAGACGACAG	1	1	predicted	MYADM_-_54371197.23-P1	GAGTCGCCACTGGCTGCCTG	2	2	predicted	MYADM_+_54371151.23-P1|MYADM_-_54371197.23-P1
TP53I3	P1P2	nonessential	TP53I3_+_24307613.23-P1P2	GGCCGCCTGGTGCATGGGAG	1	1	predicted	TP53I3_+_24307636.23-P1P2	GCGCAGGAGCCAGAACCACT	2	2	predicted	TP53I3_+_24307613.23-P1P2|TP53I3_+_24307636.23-P1P2
XYLT1	P1P2	nonessential	XYLT1_-_17564542.23-P1P2	GctccccggccccggAGTCG	1	1	predicted	XYLT1_+_17564604.23-P1P2	GCTGGCCCGGCGCTCGCACT	2	2	predicted	XYLT1_-_17564542.23-P1P2|XYLT1_+_17564604.23-P1P2
TXNRD3	P1P2	significant	TXNRD3_+_126373930.23-P1P2	GTGGTGAGAGTGGCCAGCGA	1	1	predicted	TXNRD3_-_126373917.23-P1P2	GCGCCGGGACGGGGCCTGAG	2	2	predicted	TXNRD3_+_126373930.23-P1P2|TXNRD3_-_126373917.23-P1P2
ARHGEF6	P1P2	nonessential	ARHGEF6_-_135863048.23-P1P2	GTCTTCTGGATTCATTACTG	1	1	predicted	ARHGEF6_+_135863011.23-P1P2	GAGAAGAACAAATCGTGACA	2	2	predicted	ARHGEF6_-_135863048.23-P1P2|ARHGEF6_+_135863011.23-P1P2
MUT	P1P2	significant	MUT_-_49430970.23-P1P2	GGTCAGCCGGACGACTCTGG	1	2	empirical	MUT_-_49430450.23-P1P2	GAACCCACAACCTAGAAGGG	2	5	empirical	MUT_-_49430970.23-P1P2|MUT_-_49430450.23-P1P2
CXorf40B	P1P2	nonessential	CXorf40B_-_149106648.23-P1P2	GGGCCAGTGACAGATGCTAG	1	1	predicted	CXorf40B_+_149106605.23-P1P2	GACCGGTTTCCGGGAGTAAG	2	2	predicted	CXorf40B_-_149106648.23-P1P2|CXorf40B_+_149106605.23-P1P2
ARV1	P1P2	nonessential	ARV1_-_231114864.23-P1P2	GGAGTGGAAATGGGCAACGG	1	1	predicted	ARV1_+_231114927.23-P1P2	GCTGTACTGGCAGGAGGCCG	2	2	predicted	ARV1_-_231114864.23-P1P2|ARV1_+_231114927.23-P1P2
PKP1	P1P2	nonessential	PKP1_-_201252660.23-P1P2	GAGAGAGGGACGAACCAGGG	1	1	predicted	PKP1_-_201252657.23-P1P2	GGCCAGAGAGGGACGAACCA	2	2	predicted	PKP1_-_201252660.23-P1P2|PKP1_-_201252657.23-P1P2
NFATC3	P1P2	nonessential	NFATC3_-_68119360.23-P1P2	Gaagccgacagtggaggctt	1	1	predicted	NFATC3_-_68119369.23-P1P2	Ggtggaggcttaggcaccgg	2	2	predicted	NFATC3_-_68119360.23-P1P2|NFATC3_-_68119369.23-P1P2
ZFYVE20	P1P2	significant	ZFYVE20_+_15140609.23-P1P2	GGGCGGCTGCGGCTGAGTGA	1	3	empirical	ZFYVE20_+_15140629.23-P1P2	GTCCGAGCGACCGATGGAGA	2	4	empirical	ZFYVE20_+_15140609.23-P1P2|ZFYVE20_+_15140629.23-P1P2
MYL6	P1P2	nonessential	MYL6_-_56552129.23-P1P2	GACGTACTAAGACTAGGGTT	1	1	predicted	MYL6_-_56552232.23-P1P2	GGGGCAGGATTGGGGACGAG	2	2	predicted	MYL6_-_56552129.23-P1P2|MYL6_-_56552232.23-P1P2
IK	P1	essential	IK_+_140027496.23-P1	GGAGCCTTACTATCTCGCTC	1	6	essential	IK_-_140027453.23-P1	GGTCGCTGCGGTGTTGCTGT	2	3	essential	IK_+_140027496.23-P1|IK_-_140027453.23-P1
ELF5	P1P2	nonessential	ELF5_-_34535253.23-P1P2	GGCGGTGGCTAGGTCCAAAG	1	1	predicted	ELF5_-_34535256.23-P1P2	GGTGGCTAGGTCCAAAGAGG	2	2	predicted	ELF5_-_34535253.23-P1P2|ELF5_-_34535256.23-P1P2
ACTA1	P2	significant	ACTA1_-_229568745.23-P2	GCAGCCTGACCTGGTGTCGG	1	1	predicted	ACTA1_-_229568723.23-P2	GGCCGGCTCCCTCTGCGGAG	2	2	predicted	ACTA1_-_229568745.23-P2|ACTA1_-_229568723.23-P2
NDUFAF7	P1P2	significant	NDUFAF7_+_37458807.23-P1P2	GCTCGCTCCGCCAGGAGCTG	1	4	empirical	NDUFAF7_-_37458865.23-P1P2	GCAGCATGAGTGTACTGCTG	2	6	empirical	NDUFAF7_+_37458807.23-P1P2|NDUFAF7_-_37458865.23-P1P2
TGOLN2	P1P2	significant	TGOLN2_-_85555068.23-P1P2	GGCGACGTTCAGGAGGACCA	1	4	empirical	TGOLN2_+_85555103.23-P1P2	GTCGCGAGAGCATTAGAGGG	2	5	empirical	TGOLN2_-_85555068.23-P1P2|TGOLN2_+_85555103.23-P1P2
PARK2	P1P2	nonessential	PARK2_+_163148768.23-P1P2	GACCCAGGAGAGCCGCTGGT	1	1	predicted	PARK2_+_163148783.23-P1P2	GGGCCTGGAGGATTTAACCC	2	2	predicted	PARK2_+_163148768.23-P1P2|PARK2_+_163148783.23-P1P2
RAB3D	P1P2	nonessential	RAB3D_-_11450245.23-P1P2	GTCCGCCTGTGAACTCGCTG	1	1	predicted	RAB3D_+_11450228.23-P1P2	GCAAGCCGCAGCGAGTTCAC	2	2	predicted	RAB3D_-_11450245.23-P1P2|RAB3D_+_11450228.23-P1P2
TMED5	P1P2	nonessential	TMED5_-_93645919.23-P1P2	GAGTCTGAAGAAACTCCAGG	1	1	predicted	TMED5_-_93645916.23-P1P2	GTGGAGTCTGAAGAAACTCC	2	2	predicted	TMED5_-_93645919.23-P1P2|TMED5_-_93645916.23-P1P2
PTGS2	P1	nonessential	PTGS2_+_186649512.23-P1	GGAGCGTCAGGAGCACGTCC	1	1	predicted	PTGS2_-_186649493.23-P1	GCGTCTGGCTGTGGAGCTGA	2	2	predicted	PTGS2_+_186649512.23-P1|PTGS2_-_186649493.23-P1
YIPF7	P1P2	nonessential	YIPF7_+_44680369.23-P1P2	GAGTGGAGTGGTCACGTGAG	1	1	predicted	YIPF7_+_44680628.23-P1P2	GAGGGTCCACATGACCCGGG	2	2	predicted	YIPF7_+_44680369.23-P1P2|YIPF7_+_44680628.23-P1P2
C6orf118	P1P2	nonessential	C6orf118_+_165722900.23-P1P2	GGGTCACTAGGGCTGAGGAC	1	1	predicted	C6orf118_+_165723042.23-P1P2	GGCGGGAGCCTGAATGTAAG	2	2	predicted	C6orf118_+_165722900.23-P1P2|C6orf118_+_165723042.23-P1P2
ZNF729	P1P2	nonessential	ZNF729_+_22469240.23-P1P2	GAAGGCGAGACCGGGAACTG	1	1	predicted	ZNF729_+_22469290.23-P1P2	GTCCAATGCCGCAGGTTACA	2	2	predicted	ZNF729_+_22469240.23-P1P2|ZNF729_+_22469290.23-P1P2
TRUB1	P1P2	nonessential	TRUB1_-_116698030.23-P1P2	GAGTATGGCCGCTTCTGAGG	1	1	predicted	TRUB1_-_116698001.23-P1P2	GTCCACGATGAAACAGGTCT	2	2	predicted	TRUB1_-_116698030.23-P1P2|TRUB1_-_116698001.23-P1P2
GPR65	P1P2	nonessential	GPR65_-_88471566.23-P1P2	GACATCACCGGAAGAAATAT	1	1	predicted	GPR65_-_88471512.23-P1P2	GTCTCTTCTTGACTTGATGC	2	2	predicted	GPR65_-_88471566.23-P1P2|GPR65_-_88471512.23-P1P2
E2F7	P1P2	nonessential	E2F7_-_77459318.23-P1P2	GGCAGCGCCAGCGCTCAGAC	1	1	predicted	E2F7_+_77459335.23-P1P2	GTTAGCGGGGACTACGATCC	2	2	predicted	E2F7_-_77459318.23-P1P2|E2F7_+_77459335.23-P1P2
CRADD	P1P2	nonessential	CRADD_-_94071197.23-P1P2	GGGCAGGTTCCCTAACAGTC	1	1	predicted	CRADD_+_94071184.23-P1P2	GACCGGAATCCTGACTGTTA	2	2	predicted	CRADD_-_94071197.23-P1P2|CRADD_+_94071184.23-P1P2
WASF2	P1P2	nonessential	WASF2_+_27816637.23-P1P2	GGTAATGGCGGACACAGGCA	1	1	predicted	WASF2_+_27816642.23-P1P2	GATCGCGTAATGGCGGACAC	2	2	predicted	WASF2_+_27816637.23-P1P2|WASF2_+_27816642.23-P1P2
CHMP2B	P1P2	nonessential	CHMP2B_-_87276729.23-P1P2	GGAGTTCCAGGCCGGGCTGA	1	1	predicted	CHMP2B_-_87276632.23-P1P2	GTCCTTTGCCAGCGTTgggc	2	2	predicted	CHMP2B_-_87276729.23-P1P2|CHMP2B_-_87276632.23-P1P2
EGR1	P2	significant	EGR1_+_137804541.23-P2	GGCAAGGCGCATCACACAAA	1	1	predicted	EGR1_-_137804619.23-P2	GTCACCTCTAGCCTTAAGGG	2	2	predicted	EGR1_+_137804541.23-P2|EGR1_-_137804619.23-P2
PPP1R3F	P1P2	nonessential	PPP1R3F_+_49126324.23-P1P2	GGCCGTACGCGCCATATcgg	1	1	predicted	PPP1R3F_+_49126297.23-P1P2	Ggcggcaccgacggcaccgg	2	2	predicted	PPP1R3F_+_49126324.23-P1P2|PPP1R3F_+_49126297.23-P1P2
TAF1D	P2	significant	TAF1D_-_93471390.23-P2	GTATCTATTAGTGAGTATAT	1	1	predicted	TAF1D_+_93471338.23-P2	GAATTTAGAAGCAGAGGATC	2	2	predicted	TAF1D_-_93471390.23-P2|TAF1D_+_93471338.23-P2
NHLRC3	P1P2	nonessential	NHLRC3_-_39612540.23-P1P2	GCCCGAAGCACCTGACATGA	1	1	predicted	NHLRC3_-_39612543.23-P1P2	GGAAGCACCTGACATGAGGG	2	2	predicted	NHLRC3_-_39612540.23-P1P2|NHLRC3_-_39612543.23-P1P2
NOC4L	P1P2	significant	NOC4L_+_132629017.23-P1P2	GCTCCATGCCGCCCCCAACA	1	3	empirical	NOC4L_+_132629052.23-P1P2	GAGAGCCCGGCGAACTCCCG	2	4	empirical	NOC4L_+_132629017.23-P1P2|NOC4L_+_132629052.23-P1P2
HIST1H2AA	P1P2	nonessential	HIST1H2AA_+_25726732.23-P1P2	GTGTCTGGACGAGGGAAGCA	1	1	predicted	HIST1H2AA_+_25726747.23-P1P2	GTTTGATGCGAGGAGATGTC	2	2	predicted	HIST1H2AA_+_25726732.23-P1P2|HIST1H2AA_+_25726747.23-P1P2
SLC7A14	P1P2	nonessential	SLC7A14_-_170303817.23-P1P2	GTGGTGGTGGCGGCAAAGGA	1	1	predicted	SLC7A14_+_170303593.23-P1P2	GCCTCTCCCGGAATGACCCA	2	2	predicted	SLC7A14_-_170303817.23-P1P2|SLC7A14_+_170303593.23-P1P2
SMG9	P1P2	significant	SMG9_+_44258643.23-P1P2	GCGTCAATTCGATACTGGGT	1	10	empirical	SMG9_-_44259022.23-P1P2	GGCTGGGCCGAAGGAAGAAG	2	1	empirical	SMG9_+_44258643.23-P1P2|SMG9_-_44259022.23-P1P2
INPP5E	P1P2	nonessential	INPP5E_-_139334239.23-P1P2	GGAAGTCGACCCGGTACTCG	1	1	predicted	INPP5E_-_139334242.23-P1P2	GGTCGACCCGGTACTCGCGG	2	2	predicted	INPP5E_-_139334239.23-P1P2|INPP5E_-_139334242.23-P1P2
SLC39A4	P2	nonessential	SLC39A4_-_145642198.23-P2	GAGCTCCCAGCGTGCTCAGT	1	1	predicted	SLC39A4_+_145642160.23-P2	GGAGCTGAGTATGGCGTCCC	2	2	predicted	SLC39A4_-_145642198.23-P2|SLC39A4_+_145642160.23-P2
LILRB4	P1	nonessential	LILRB4_-_55174474.23-P1	GCTGCACAGCTGGGGCCCCT	2	2	predicted	LILRB4_+_55174483.23-P1	GGCCGTGAAGGTGGGGATCA	3	3	predicted	LILRB4_-_55174474.23-P1|LILRB4_+_55174483.23-P1
C2orf27B	ENST00000303798.2	nonessential	C2orf27B_-_132559184.23-ENST00000303798.2	GGACAGGCTGCTGCACCAGG	2	2	predicted	C2orf27B_-_132558896.23-ENST00000303798.2	GTAGCCCACGGAGCCACGGT	3	3	predicted	C2orf27B_-_132559184.23-ENST00000303798.2|C2orf27B_-_132558896.23-ENST00000303798.2
CHD9	P2	significant	CHD9_-_53165040.23-P2	GAGGAAGCCCGGGGGCACCG	1	1	empirical	CHD9_-_53164953.23-P2	GCTGCCCCGCGCTGACAGGG	2	2	predicted	CHD9_-_53165040.23-P2|CHD9_-_53164953.23-P2
TUBB2A	P1P2	significant	TUBB2A_-_3157719.23-P1P2	GGTGCCGGCTGCGGAGCGGG	1	2	empirical	TUBB2A_-_3157715.23-P1P2	GCATGGTGCCGGCTGCGGAG	2	1	empirical	TUBB2A_-_3157719.23-P1P2|TUBB2A_-_3157715.23-P1P2
TP73	P1P2	significant	TP73_-_3569572.23-P1P2	GTAACCCCGGGAAGAGGCCG	1	7	empirical	TP73_-_3569486.23-P1P2	GGCCAAAGACAGCCCCGCAG	2	7	empirical	TP73_-_3569572.23-P1P2|TP73_-_3569486.23-P1P2
KRT17	P1P2	nonessential	KRT17_+_39780834.23-P1P2	GAAAGGAAGCGGGCGAACCC	1	1	predicted	KRT17_-_39780860.23-P1P2	GGTTCGCCCGCTTCCTTTAT	2	2	predicted	KRT17_+_39780834.23-P1P2|KRT17_-_39780860.23-P1P2
C19orf57	P1P2	nonessential	C19orf57_+_14016746.23-P1P2	GGGTCGGCGTAGTGTCAGTG	1	1	predicted	C19orf57_+_14016762.23-P1P2	GGTCCTCACTTCTCGGTGGT	2	2	predicted	C19orf57_+_14016746.23-P1P2|C19orf57_+_14016762.23-P1P2
SNRNP27	P1P2	significant	SNRNP27_-_70121148.23-P1P2	GTCGCAGCCGCTCTCCACGG	1	3	empirical	SNRNP27_+_70121140.23-P1P2	GTACAGGACTCACCCCTCCG	2	1	empirical	SNRNP27_-_70121148.23-P1P2|SNRNP27_+_70121140.23-P1P2
HKR1	P2	nonessential	HKR1_+_37825603.23-P2	GTGTGGGAAAGACCTTAAGA	1	1	predicted	HKR1_-_37825588.23-P2	GCAGGCGCGTTAAGCTGGTT	2	2	predicted	HKR1_+_37825603.23-P2|HKR1_-_37825588.23-P2
LACTB2	P1P2	nonessential	LACTB2_+_71581384.23-P1P2	GCGCGCTGGAGTATCCAGAT	1	1	predicted	LACTB2_-_71581420.23-P1P2	GCAGCGCGGAAGAAGCCAAC	2	2	predicted	LACTB2_+_71581384.23-P1P2|LACTB2_-_71581420.23-P1P2
LMOD2	P1P2	nonessential	LMOD2_+_123295962.23-P1P2	GAAGGACCAGGCATTCAAGG	1	1	predicted	LMOD2_+_123295951.23-P1P2	GATTCAAGGCGGCCAGAAGC	2	2	predicted	LMOD2_+_123295962.23-P1P2|LMOD2_+_123295951.23-P1P2
LRCH4	P1	nonessential	LRCH4_-_100183735.23-P1	GCGCCGCCATCCGCTCCCGG	1	1	predicted	LRCH4_+_100183739.23-P1	GGGTCCCGTCAGTCAGGCAG	2	2	predicted	LRCH4_-_100183735.23-P1|LRCH4_+_100183739.23-P1
TNIP1	P2	nonessential	TNIP1_-_150466671.23-P2	GGAAGGGCAGGAGAATACGA	1	1	predicted	TNIP1_-_150466689.23-P2	GAGGGTGTGTGCACCAGGGG	2	2	predicted	TNIP1_-_150466671.23-P2|TNIP1_-_150466689.23-P2
ZNF211	P1P2	nonessential	ZNF211_+_58144577.23-P1P2	GACAGAACGGACCTCCGGGA	1	1	predicted	ZNF211_+_58144590.23-P1P2	GAAGCGGCTGACAGACAGAA	2	2	predicted	ZNF211_+_58144577.23-P1P2|ZNF211_+_58144590.23-P1P2
FAR1	P1P2	significant	FAR1_-_13690642.23-P1P2	GGAGCCCGGGGAGCCGCCTG	1	8	empirical	FAR1_-_13690253.23-P1P2	GTTCAGCAGCCGGTCGCGGG	2	7	empirical	FAR1_-_13690642.23-P1P2|FAR1_-_13690253.23-P1P2
APOA4	P1P2	nonessential	APOA4_+_116693985.23-P1P2	GGCGCAGGTGAGCTCTCCTG	1	1	predicted	APOA4_+_116693941.23-P1P2	GTTGTAGGGAGGATCCAGTG	2	2	predicted	APOA4_+_116693985.23-P1P2|APOA4_+_116693941.23-P1P2
IGDCC3	P1P2	nonessential	IGDCC3_+_65670321.23-P1P2	GGCTGACAGATCGCCCGGGT	1	1	predicted	IGDCC3_+_65670325.23-P1P2	GCGAGGCTGACAGATCGCCC	2	2	predicted	IGDCC3_+_65670321.23-P1P2|IGDCC3_+_65670325.23-P1P2
LIPK	ENST00000404190.1	nonessential	LIPK_-_90484305.23-ENST00000404190.1	GCCTAGGCAGATCCCAAATG	1	1	predicted	LIPK_-_90484343.23-ENST00000404190.1	GCATGCTGGATGCTTCTTCT	2	2	predicted	LIPK_-_90484305.23-ENST00000404190.1|LIPK_-_90484343.23-ENST00000404190.1
DEFB103B	ENST00000318124.3	nonessential	DEFB103B_-_7287864.23-ENST00000318124.3	GGGTAAGGCAGAGCTCCCTA	1	1	predicted	DEFB103B_-_7287844.23-ENST00000318124.3	GCAGTTAATTAGGAACCCAA	2	2	predicted	DEFB103B_-_7287864.23-ENST00000318124.3|DEFB103B_-_7287844.23-ENST00000318124.3
LRRC40	P1P2	nonessential	LRRC40_+_70671196.23-P1P2	GGCGCCTGAAGCGGATAGCG	1	1	predicted	LRRC40_+_70671205.23-P1P2	GGAACATGTCGCGCCTGAAG	2	2	predicted	LRRC40_+_70671196.23-P1P2|LRRC40_+_70671205.23-P1P2
GPX2	P1P2	nonessential	GPX2_+_65409440.23-P1P2	GCTCACTCTGCGCTTCACCA	1	1	predicted	GPX2_+_65409481.23-P1P2	GCTCTAATAGGCTCATAAGT	2	2	predicted	GPX2_+_65409440.23-P1P2|GPX2_+_65409481.23-P1P2
CCL14	P2	nonessential	CCL14_-_34328887.23-P2	GAAGCCTGAGATAGGAGTGG	1	1	predicted	CCL14_+_34328997.23-P2	Gaggctgctgcagactgata	2	2	predicted	CCL14_-_34328887.23-P2|CCL14_+_34328997.23-P2
C2orf68	P1P2	nonessential	C2orf68_-_85839118.23-P1P2	GCCGCCTCCATCAGGAGCCG	1	1	predicted	C2orf68_+_85839164.23-P1P2	GGGGCGGCGCGGAGCTCTGT	2	2	predicted	C2orf68_-_85839118.23-P1P2|C2orf68_+_85839164.23-P1P2
CATSPERB	P1P2	nonessential	CATSPERB_+_92198408.23-P1P2	GGCTGATTGGCTGTTACCAA	1	1	predicted	CATSPERB_-_92198367.23-P1P2	GAGAAGAAAGACCCAAAGTC	2	2	predicted	CATSPERB_+_92198408.23-P1P2|CATSPERB_-_92198367.23-P1P2
RNASET2	P1P2	nonessential	RNASET2_+_167370010.23-P1P2	GCGCGACTGACCGTGGTCGT	1	1	predicted	RNASET2_+_167370017.23-P1P2	GGGAGCAACGCGACTGACCG	2	2	predicted	RNASET2_+_167370010.23-P1P2|RNASET2_+_167370017.23-P1P2
KIAA0825	P1P2	nonessential	KIAA0825_+_93954269.23-P1P2	GTCGCCAGGGTGGTAATACC	1	1	predicted	KIAA0825_+_93954238.23-P1P2	GTGAGTCTGGCCAGCGGGTC	2	2	predicted	KIAA0825_+_93954269.23-P1P2|KIAA0825_+_93954238.23-P1P2
COX6C	P1P2	significant	COX6C_-_100905842.23-P1P2	GCAACCCGCAGTGTCGGGGT	1	4	empirical	COX6C_-_100905522.23-P1P2	Gtctcacgggagaaacaccg	2	4	empirical	COX6C_-_100905842.23-P1P2|COX6C_-_100905522.23-P1P2
OR6C74	ENST00000343870.4	nonessential	OR6C74_-_55640986.23-ENST00000343870.4	GGGTAGCAATGTCTTTATGG	1	1	predicted	OR6C74_-_55641003.23-ENST00000343870.4	GGGTGGATTTCAAGAAAAAT	2	2	predicted	OR6C74_-_55640986.23-ENST00000343870.4|OR6C74_-_55641003.23-ENST00000343870.4
AKAP3	P1	nonessential	AKAP3_-_4758224.23-P1	GTTGCGCAGACAGGCGAGAA	1	1	predicted	AKAP3_-_4758021.23-P1	Gcatgtcctgagtcagtcac	2	2	predicted	AKAP3_-_4758224.23-P1|AKAP3_-_4758021.23-P1
C1orf35	P1P2	nonessential	C1orf35_+_228291147.23-P1P2	GCAGGGTAGGCGCAGTGCGC	1	1	predicted	C1orf35_+_228290996.23-P1P2	GGCCTGGGTCCGACGGTAGT	2	2	predicted	C1orf35_+_228291147.23-P1P2|C1orf35_+_228290996.23-P1P2
S100P	P1P2	nonessential	S100P_-_6695684.23-P1P2	GCGGAACTAGAGACAGCCAT	1	1	predicted	S100P_+_6695657.23-P1P2	GGCTGTCTCTAGTTCCGTCA	2	2	predicted	S100P_-_6695684.23-P1P2|S100P_+_6695657.23-P1P2
OR2V2	ENST00000328275.1	nonessential	OR2V2_+_180582000.23-ENST00000328275.1	GACAAGGTCAGCAGTACTGT	1	1	predicted	OR2V2_+_180582030.23-ENST00000328275.1	GGTGAAGACCGCCATAACCA	3	3	predicted	OR2V2_+_180582000.23-ENST00000328275.1|OR2V2_+_180582030.23-ENST00000328275.1
TJP2	P2	nonessential	TJP2_+_71736452.23-P2	GAAGCTCCCCGGGAATGGGA	1	1	predicted	TJP2_-_71736442.23-P2	GTATACGGGAGCAGCCGCGG	2	2	predicted	TJP2_+_71736452.23-P2|TJP2_-_71736442.23-P2
TRIM55	P1P2	nonessential	TRIM55_+_67039278.23-P1P2	GGTCCATATAAGCCAGTGAC	1	1	predicted	TRIM55_+_67039361.23-P1P2	GAGGACATTGTTTCAGGCCC	2	2	predicted	TRIM55_+_67039278.23-P1P2|TRIM55_+_67039361.23-P1P2
NRD1	P1P2	significant	NRD1_+_52344328.23-P1P2	GTCTAGAACGCGGAGGAGGT	1	1	empirical	NRD1_-_52344156.23-P1P2	GGGCATGGCCAGAATAGGAA	2	8	empirical	NRD1_+_52344328.23-P1P2|NRD1_-_52344156.23-P1P2
GNGT2	P2	nonessential	GNGT2_+_47286228.23-P2	GGAGTCCAGGACAAGTGACT	1	1	predicted	GNGT2_+_47286180.23-P2	GGAGGGGCTGAGGTTGCACT	2	2	predicted	GNGT2_+_47286228.23-P2|GNGT2_+_47286180.23-P2
NEUROG3	P1P2	nonessential	NEUROG3_-_71333153.23-P1P2	GGCTCTCTCTCGAGGCGCGG	1	1	predicted	NEUROG3_-_71333121.23-P1P2	GGAAGAGAGAATGGGGTCCG	2	2	predicted	NEUROG3_-_71333153.23-P1P2|NEUROG3_-_71333121.23-P1P2
WNT2B	P1P2	significant	WNT2B_+_113051584.23-P1P2	GGAGCTGCGGGCCTAGTGTG	1	3	empirical	WNT2B_+_113051712.23-P1P2	GGGAGGAGGATCCCCGAGAG	2	10	empirical	WNT2B_+_113051584.23-P1P2|WNT2B_+_113051712.23-P1P2
MEGF9	P1P2	nonessential	MEGF9_-_123476580.23-P1P2	GgcggcggcgCAGCACAACA	1	1	predicted	MEGF9_+_123476730.23-P1P2	GTGTCAGAGGGAGGTGGCGA	2	2	predicted	MEGF9_-_123476580.23-P1P2|MEGF9_+_123476730.23-P1P2
MLXIPL	P1P2	nonessential	MLXIPL_+_73038830.23-P1P2	GAGGGACCAGGCGGTTGCGG	1	1	predicted	MLXIPL_+_73038797.23-P1P2	GGCCGGCGCGCTGGCAGGTC	2	2	predicted	MLXIPL_+_73038830.23-P1P2|MLXIPL_+_73038797.23-P1P2
RSPRY1	P1P2	nonessential	RSPRY1_+_57220283.23-P1P2	GTGTGACAGGTCCGAGAGAA	1	1	predicted	RSPRY1_-_57220254.23-P1P2	GGGGTGGGCTCTGCGCGTAA	2	2	predicted	RSPRY1_+_57220283.23-P1P2|RSPRY1_-_57220254.23-P1P2
AGPAT1	P1	significant	AGPAT1_+_32143853.23-P1	GGGTGGCGGGGGAATAGCGG	1	2	empirical	AGPAT1_+_32143856.23-P1	GAGGGGTGGCGGGGGAATAG	2	1	empirical	AGPAT1_+_32143853.23-P1|AGPAT1_+_32143856.23-P1
GPR141	P1P2	significant	GPR141_+_37723712.23-P1P2	GACATTTACCCATAAATATT	1	10	empirical	GPR141_-_37723580.23-P1P2	GTAAAGCACACTTAATTTGT	2	7	empirical	GPR141_+_37723712.23-P1P2|GPR141_-_37723580.23-P1P2
TMEM199	P1P2	nonessential	TMEM199_+_26684570.23-P1P2	GTGGGACCAGGCGGGCCAAG	1	1	predicted	TMEM199_-_26684696.23-P1P2	GCCGGAGAGCCGGCTAGATA	2	2	predicted	TMEM199_+_26684570.23-P1P2|TMEM199_-_26684696.23-P1P2
ZNF830	P1P2	essential	ZNF830_-_33288620.23-P1P2	GCTCCGCCCGGACTCCGGCA	1	3	essential	ZNF830_+_33288601.23-P1P2	GTTCCCTGCCGGAGTCCGGG	2	1	essential	ZNF830_-_33288620.23-P1P2|ZNF830_+_33288601.23-P1P2
YIF1B	P1P2	nonessential	YIF1B_+_38806547.23-P1P2	GCGGCGGCGAAGGATGCACC	1	1	predicted	YIF1B_+_38806535.23-P1P2	GATGCACCCGGCAGGCTTGG	2	2	predicted	YIF1B_+_38806547.23-P1P2|YIF1B_+_38806535.23-P1P2
RDH12	P1P2	nonessential	RDH12_-_68189276.23-P1P2	GAGCAGAAGCAGCCAAGAGC	1	1	predicted	RDH12_+_68189384.23-P1P2	GTACAGGAACGAGAAGAAGG	2	2	predicted	RDH12_-_68189276.23-P1P2|RDH12_+_68189384.23-P1P2
HP1BP3	P1P2	nonessential	HP1BP3_+_21113749.23-P1P2	Gcggtggcggaggcgactag	1	1	predicted	HP1BP3_+_21113775.23-P1P2	Ggctcggcggctgggactgg	2	2	predicted	HP1BP3_+_21113749.23-P1P2|HP1BP3_+_21113775.23-P1P2
MAGEB3	P1P2	nonessential	MAGEB3_+_30248844.23-P1P2	GTCAAGGTCCTCCGAGATCT	1	1	predicted	MAGEB3_+_30248792.23-P1P2	GGGATGTTTGGGTCCTGTGA	2	2	predicted	MAGEB3_+_30248844.23-P1P2|MAGEB3_+_30248792.23-P1P2
IP6K1	P1P2	significant	IP6K1_-_49823914.23-P1P2	GCGCTACAGCGGCCTCTCAC	1	3	empirical	IP6K1_+_49823904.23-P1P2	GGGACCAAGCGGCCGGTGAG	2	6	empirical	IP6K1_-_49823914.23-P1P2|IP6K1_+_49823904.23-P1P2
RHOH	P1P2	nonessential	RHOH_+_40198690.23-P1P2	GGAGTCCACCCCAAGATGGT	1	1	predicted	RHOH_+_40198694.23-P1P2	GCAGGGAGTCCACCCCAAGA	2	2	predicted	RHOH_+_40198690.23-P1P2|RHOH_+_40198694.23-P1P2
CASZ1	ENST00000377022.3	nonessential	CASZ1_+_10856607.23-ENST00000377022.3	GCAAGTGCAGGTAAGAGACT	1	1	predicted	CASZ1_-_10856661.23-ENST00000377022.3	GGGTGACTTTCCAAGTCCGG	2	2	predicted	CASZ1_+_10856607.23-ENST00000377022.3|CASZ1_-_10856661.23-ENST00000377022.3
SEMA3B	P1	nonessential	SEMA3B_-_50310974.23-P1	GTCGTCCCGGCAGAACGACG	1	1	predicted	SEMA3B_-_50306705.23-P1	GGGGGCTGCCGCCGTGATCC	2	2	predicted	SEMA3B_-_50310974.23-P1|SEMA3B_-_50306705.23-P1
KLHDC8A	P1P2	nonessential	KLHDC8A_+_205325992.23-P1P2	GGAGAGGCGCGGAGACACTG	1	1	predicted	KLHDC8A_+_205326020.23-P1P2	GGGCCTTTGCAGCTGAGACT	2	2	predicted	KLHDC8A_+_205325992.23-P1P2|KLHDC8A_+_205326020.23-P1P2
GSTA3	P1P2	nonessential	GSTA3_+_52774271.23-P1P2	GTAGTTCCTGAAGGACAGGT	1	1	predicted	GSTA3_-_52774456.23-P1P2	GAACTTGAGTAAAGTCTAGC	2	2	predicted	GSTA3_+_52774271.23-P1P2|GSTA3_-_52774456.23-P1P2
RPS17	ENST00000330339.7	significant	RPS17_-_82824897.23-ENST00000330339.7	GGCGAAGCCTGTTAAAGCTT	1	8	empirical	RPS17_+_82824718.23-ENST00000330339.7	GGAAGGCGCAGAGCCCTGTC	2	2	empirical	RPS17_-_82824897.23-ENST00000330339.7|RPS17_+_82824718.23-ENST00000330339.7
OR2V1	ENST00000329365.2	nonessential	OR2V1_+_180552291.23-ENST00000329365.2	GAACTAAGCCATGGGAAGAT	1	1	predicted	OR2V1_-_180552305.23-ENST00000329365.2	GTGGTTCACCCATCTTCCCA	2	2	predicted	OR2V1_+_180552291.23-ENST00000329365.2|OR2V1_-_180552305.23-ENST00000329365.2
PIFO	P1P2	nonessential	PIFO_+_111889259.23-P1P2	GAGCACATCGCGAGCTGCTA	1	1	predicted	PIFO_+_111889306.23-P1P2	GCCCTCTACTCTAGGCTTCT	2	2	predicted	PIFO_+_111889259.23-P1P2|PIFO_+_111889306.23-P1P2
PKHD1L1	P1P2	nonessential	PKHD1L1_-_110374742.23-P1P2	GGCCAGCGAGTCGCAGTCCC	1	1	predicted	PKHD1L1_-_110374780.23-P1P2	GTAGAGCCAGCTGCGAGCGG	2	2	predicted	PKHD1L1_-_110374742.23-P1P2|PKHD1L1_-_110374780.23-P1P2
HEYL	P1P2	nonessential	HEYL_+_40105312.23-P1P2	GTAGCCGCGGGGCTGAGACC	1	1	predicted	HEYL_+_40105271.23-P1P2	GAGCGACCCAAGGAGCCGAG	2	2	predicted	HEYL_+_40105312.23-P1P2|HEYL_+_40105271.23-P1P2
NMI	P1P2	nonessential	NMI_-_152145933.23-P1P2	GAGGTGCGCCCCCTCGAAGG	1	1	predicted	NMI_+_152146097.23-P1P2	GCGGGCGGACGCGGGTGAGT	2	2	predicted	NMI_-_152145933.23-P1P2|NMI_+_152146097.23-P1P2
UBE2S	P1P2	significant	UBE2S_-_55919136.23-P1P2	GGTAGACCAACCCGCCGCCC	1	1	empirical	UBE2S_+_55919175.23-P1P2	GCCTGCGGGCGGTTATAAAG	2	2	empirical	UBE2S_-_55919136.23-P1P2|UBE2S_+_55919175.23-P1P2
IL21	P1P2	nonessential	IL21_-_123542193.23-P1P2	GCAACAGTAGAGCTAGACCT	1	1	predicted	IL21_+_123542136.23-P1P2	GCAGTCCTGGCAACATGGAG	2	2	predicted	IL21_-_123542193.23-P1P2|IL21_+_123542136.23-P1P2
RAB23	P1P2	nonessential	RAB23_+_57087070.23-P1P2	GCGGCGGGTCCACAGATGAG	1	1	predicted	RAB23_-_57087022.23-P1P2	GAGCCAGGGCTCAGATTGAG	2	2	predicted	RAB23_+_57087070.23-P1P2|RAB23_-_57087022.23-P1P2
RARRES3	P1P2	nonessential	RARRES3_-_63304332.23-P1P2	GGGAGCACCAGACCTCCTCT	1	1	predicted	RARRES3_+_63304322.23-P1P2	GCCATCTCGAAGCCAAGAGG	2	2	predicted	RARRES3_-_63304332.23-P1P2|RARRES3_+_63304322.23-P1P2
POLR3E	P1P2	nonessential	POLR3E_+_22308794.23-P1P2	GTACCCGCGGGCTGCAGAGA	1	1	predicted	POLR3E_-_22308778.23-P1P2	GAACATGGCCGCCGCCTGAG	2	2	predicted	POLR3E_+_22308794.23-P1P2|POLR3E_-_22308778.23-P1P2
FAM105A	P1P2	nonessential	FAM105A_+_14581952.23-P1P2	GCTCGGCCCGTGGTCTGCAG	1	1	predicted	FAM105A_-_14581921.23-P1P2	GGCCTCAGGGAAGCGAgccc	2	2	predicted	FAM105A_+_14581952.23-P1P2|FAM105A_-_14581921.23-P1P2
TNFAIP8L2	P1P2	nonessential	TNFAIP8L2_-_151129204.23-P1P2	GCACCCAGCACAGCAGGTGA	1	1	predicted	TNFAIP8L2_-_151129173.23-P1P2	GAGCTTTCCGGGAACATCCA	2	2	predicted	TNFAIP8L2_-_151129204.23-P1P2|TNFAIP8L2_-_151129173.23-P1P2
SUSD4	P1P2	nonessential	SUSD4_+_223537459.23-P1P2	GCAGAGGTCGCGCACAGATG	1	1	predicted	SUSD4_-_223537510.23-P1P2	GGCTGCGCGAGCGAGCGAGA	2	2	predicted	SUSD4_+_223537459.23-P1P2|SUSD4_-_223537510.23-P1P2
TNPO2	P1	nonessential	TNPO2_+_12834783.23-P1	GGAGGCCTTTACGCATGCCT	1	1	predicted	TNPO2_+_12834828.23-P1	GGACGGGATTTGTAGTTCCA	2	2	predicted	TNPO2_+_12834783.23-P1|TNPO2_+_12834828.23-P1
EPM2A	P1P2	nonessential	EPM2A_-_146056625.23-P1P2	GTGGCACCACCACCCCAAAG	1	1	predicted	EPM2A_+_146056336.23-P1P2	GCCGGGAGGAGAGCTCTCCT	2	2	predicted	EPM2A_-_146056625.23-P1P2|EPM2A_+_146056336.23-P1P2
CACNG4	P1P2	nonessential	CACNG4_-_64960881.23-P1P2	GCCGGAGCGCAGGCAcgccc	1	1	predicted	CACNG4_+_64960835.23-P1P2	GCGCTGGGGCTCAAACTCCG	2	2	predicted	CACNG4_-_64960881.23-P1P2|CACNG4_+_64960835.23-P1P2
SGSM3	P1P2	nonessential	SGSM3_-_40766663.23-P1P2	GGGAAGCTGCTAACCCGACC	1	1	predicted	SGSM3_-_40766688.23-P1P2	GGGCGCTGAGGTGGCCCGTG	2	2	predicted	SGSM3_-_40766663.23-P1P2|SGSM3_-_40766688.23-P1P2
ZNF718	ENST00000510175.1,ENST00000511079.1,ENST00000513304.1,ENST00000513889.1	nonessential	ZNF718_+_124420.23-ENST00000510175.1,ENST00000511079.1,ENST00000513304.1,ENST00000513889.1	GGAGCGGGAGCAGAGCGATG	1	1	predicted	ZNF718_+_124436.23-ENST00000510175.1,ENST00000511079.1,ENST00000513304.1,ENST00000513889.1	GCCGAGGCTTCCCTAAGGAG	2	2	predicted	ZNF718_+_124420.23-ENST00000510175.1,ENST00000511079.1,ENST00000513304.1,ENST00000513889.1|ZNF718_+_124436.23-ENST00000510175.1,ENST00000511079.1,ENST00000513304.1,ENST00000513889.1
HIST1H1E	P1P2	significant	HIST1H1E_-_26157047.23-P1P2	GAAGCCCAAGAAGGCGACGG	1	7	empirical	HIST1H1E_+_26156610.23-P1P2	GGCAGTCTCGGACATGTTGA	2	4	empirical	HIST1H1E_-_26157047.23-P1P2|HIST1H1E_+_26156610.23-P1P2
C11orf16	P1P2	nonessential	C11orf16_+_8954431.23-P1P2	GCTGTGGGTAAGTCCTTGTG	1	1	predicted	C11orf16_-_8954401.23-P1P2	GGCCCACCAGAGCCCCGTGA	2	2	predicted	C11orf16_+_8954431.23-P1P2|C11orf16_-_8954401.23-P1P2
PCDHGB7	P1P2	nonessential	PCDHGB7_+_140797504.23-P1P2	GGGATCGGCTCACACAGCGT	1	1	predicted	PCDHGB7_+_140797291.23-P1P2	GCAATCTGGTGTGCTGGGCA	2	2	predicted	PCDHGB7_+_140797504.23-P1P2|PCDHGB7_+_140797291.23-P1P2
RBM14-RBM4	P1	essential	RBM14-RBM4_+_66384103.23-P1	GACGACCGGCAGTCCTCCTC	1	3	essential	RBM14-RBM4_-_66384112.23-P1	GTCGCCAGCCATTCCTGAGG	2	3	essential	RBM14-RBM4_+_66384103.23-P1|RBM14-RBM4_-_66384112.23-P1
PRDX2	P1P2	significant	PRDX2_+_12912209.23-P1P2	GCCTCGTAGACCGGGTACCC	1	3	empirical	PRDX2_+_12912205.23-P1P2	GGTAGACCGGGTACCCGGGA	2	2	empirical	PRDX2_+_12912209.23-P1P2|PRDX2_+_12912205.23-P1P2
IL17RD	P1P2	nonessential	IL17RD_+_57199337.23-P1P2	GGCGGCCGGGGCGCAGAGAA	1	1	predicted	IL17RD_-_57199383.23-P1P2	GCCGCTGGCCAGCCCCGAGT	2	2	predicted	IL17RD_+_57199337.23-P1P2|IL17RD_-_57199383.23-P1P2
S100A6	P1P2	nonessential	S100A6_-_153508426.23-P1P2	GGCTCCTGGAGAGAACTCAC	1	1	predicted	S100A6_-_153508431.23-P1P2	GTGGAGAGAACTCACCGGTA	2	2	predicted	S100A6_-_153508426.23-P1P2|S100A6_-_153508431.23-P1P2
SEMA4D	P2	nonessential	SEMA4D_+_92051326.23-P2	GGCCCTGCGTGAGGATGGGG	1	1	predicted	SEMA4D_+_92051357.23-P2	GCAGTCAGGACAGACGTCCC	2	2	predicted	SEMA4D_+_92051326.23-P2|SEMA4D_+_92051357.23-P2
TMCO1	P1P2	nonessential	TMCO1_+_165738067.23-P1P2	GTCGGTGGTGGCGGAGTCTA	1	1	predicted	TMCO1_+_165738082.23-P1P2	GGAGTTGGTCTGTTACTCGG	2	2	predicted	TMCO1_+_165738067.23-P1P2|TMCO1_+_165738082.23-P1P2
RACGAP1	P1P2	essential	RACGAP1_-_50419239.23-P1P2	GCGCTCCGCGCCTCACCCAA	1	2	essential	RACGAP1_+_50419209.23-P1P2	GGAGGCGCGGAGCGAAGTGA	2	1	essential	RACGAP1_-_50419239.23-P1P2|RACGAP1_+_50419209.23-P1P2
HSP90AA1	P1P2	significant	HSP90AA1_-_102553365.23-P1P2	GACCAACGGCACAGCCACAC	1	2	empirical	HSP90AA1_+_102553357.23-P1P2	GTTGCTTCAGCGTCCCGGTG	2	1	empirical	HSP90AA1_-_102553365.23-P1P2|HSP90AA1_+_102553357.23-P1P2
SYT1	P2	nonessential	SYT1_+_79439533.23-P2	GTGACTTACGAGCCATCTGT	1	1	predicted	SYT1_+_79439481.23-P2	GATCTATCACAAGGATGAAT	2	2	predicted	SYT1_+_79439533.23-P2|SYT1_+_79439481.23-P2
ART3	P1	nonessential	ART3_-_76995916.23-P1	GGCTTACCACAACTGAGAGT	1	1	predicted	ART3_+_76995900.23-P1	GGACTCCCCACTCTCAGTTG	2	2	predicted	ART3_-_76995916.23-P1|ART3_+_76995900.23-P1
UNKL	P1P2	nonessential	UNKL_+_1464667.23-P1P2	GCCGTCGGTTTCGAAAGCGG	1	1	predicted	UNKL_-_1464648.23-P1P2	GGGCTTCTCAGTCTGCGGGG	2	2	predicted	UNKL_+_1464667.23-P1P2|UNKL_-_1464648.23-P1P2
ALOXE3	P1P2	nonessential	ALOXE3_-_8021474.23-P1P2	GCTCTCTCTGGGATGTTCCT	1	1	predicted	ALOXE3_-_8021463.23-P1P2	GGATGGGCCCAGCTCTCTCT	2	2	predicted	ALOXE3_-_8021474.23-P1P2|ALOXE3_-_8021463.23-P1P2
CUZD1	P1P2	nonessential	CUZD1_+_124605289.23-P1P2	GTGTTTGGCGGAGCTGACAA	1	1	predicted	CUZD1_+_124605286.23-P1P2	GTTGGCGGAGCTGACAATGG	2	2	predicted	CUZD1_+_124605289.23-P1P2|CUZD1_+_124605286.23-P1P2
ZP3	P1P2	nonessential	ZP3_+_76027045.23-P1P2	GCGTGTGTGACGACGACTGG	1	1	predicted	ZP3_+_76026920.23-P1P2	GACAACGTGCACTGCGAAGG	2	2	predicted	ZP3_+_76027045.23-P1P2|ZP3_+_76026920.23-P1P2
THBS3	P1	nonessential	THBS3_-_155177693.23-P1	GTCAGCCGGCTCACTACCCC	1	1	predicted	THBS3_+_155177676.23-P1	GCCTGCCAGGGGTAGTGAGC	2	2	predicted	THBS3_-_155177693.23-P1|THBS3_+_155177676.23-P1
CCNK	P1	significant	CCNK_-_99947816.23-P1	GGGGGCTTGCCTGAAGCGAG	1	8	empirical	CCNK_-_99947838.23-P1	GTGAGTGACCCACCGACTGA	2	2	empirical	CCNK_-_99947816.23-P1|CCNK_-_99947838.23-P1
C1QTNF2	P1P2	nonessential	C1QTNF2_-_159797600.23-P1P2	GGCGTCCCGGCTTTCCTCAG	1	1	predicted	C1QTNF2_-_159797622.23-P1P2	GCAGCAGCCGGGCAGAGCGT	2	2	predicted	C1QTNF2_-_159797600.23-P1P2|C1QTNF2_-_159797622.23-P1P2
YTHDF2	P1P2	significant	YTHDF2_+_29063507.23-P1P2	GTGACACTCGGGGGCCTCGG	1	3	empirical	YTHDF2_+_29063483.23-P1P2	GGCAGCGGAGACACAGCGCG	2	5	empirical	YTHDF2_+_29063507.23-P1P2|YTHDF2_+_29063483.23-P1P2
GGCT	P1P2	nonessential	GGCT_-_30544394.23-P1P2	GGCCAGAGAGCGCAACACTG	1	1	predicted	GGCT_-_30544407.23-P1P2	GACACTGGGGCCCACTACCC	2	2	predicted	GGCT_-_30544394.23-P1P2|GGCT_-_30544407.23-P1P2
2022-09-05	P1	nonessential	SEPT5_+_19706023.23-P1	GGCGAACTGGCCCCAAGCTG	1	1	predicted	SEPT5_+_19706020.23-P1	GAACTGGCCCCAAGCTGTGG	2	2	predicted	SEPT5_+_19706023.23-P1|SEPT5_+_19706020.23-P1
MTCH1	P1P2	significant	MTCH1_-_36953921.23-P1P2	GCGGCACCGCCGCGAGCCCA	1	1	predicted	MTCH1_-_36953934.23-P1P2	GAGCCCAGGGCGCCACTTCC	2	2	predicted	MTCH1_-_36953921.23-P1P2|MTCH1_-_36953934.23-P1P2
WDR24	P1P2	significant	WDR24_-_740276.23-P1P2	GGTTCCTGGGAGCGGCGCAG	1	1	empirical	WDR24_-_740033.23-P1P2	GGGTCAGTCAATCCCAGCAG	2	9	empirical	WDR24_-_740276.23-P1P2|WDR24_-_740033.23-P1P2
ALG10	P1P2	nonessential	ALG10_+_34175434.23-P1P2	GTCGAAATGGGCGCGCTAGG	1	1	predicted	ALG10_+_34175364.23-P1P2	GGCGCGGATCCGGAAAGATC	2	2	predicted	ALG10_+_34175434.23-P1P2|ALG10_+_34175364.23-P1P2
HGS	P1P2	significant	HGS_-_79651112.23-P1P2	GTCGCCATGGGGCGAGGCAG	1	4	empirical	HGS_-_79651070.23-P1P2	GCGTAGCAGGGGAGCGCCCG	2	3	empirical	HGS_-_79651112.23-P1P2|HGS_-_79651070.23-P1P2
KPNA3	P1P2	nonessential	KPNA3_-_50366677.23-P1P2	GCCGGCGGCGGCTACTCCTg	1	1	predicted	KPNA3_-_50366710.23-P1P2	GgcggcggcgAATCTTggag	2	2	predicted	KPNA3_-_50366677.23-P1P2|KPNA3_-_50366710.23-P1P2
LUC7L3	P1P2	significant	LUC7L3_-_48796990.23-P1P2	GTCGGCTCCTGTGTGTAGGA	1	1	empirical	LUC7L3_+_48797010.23-P1P2	GACACCGTCGCCAATCTCCT	2	6	empirical	LUC7L3_-_48796990.23-P1P2|LUC7L3_+_48797010.23-P1P2
ZNF716	P1P2	nonessential	ZNF716_-_57509878.23-P1P2	GGGACGCTTCCGTAAGGTTA	1	1	predicted	ZNF716_-_57510379.23-P1P2	GAGGGTGCAGGATTCGTGAG	2	2	predicted	ZNF716_-_57509878.23-P1P2|ZNF716_-_57510379.23-P1P2
CYP3A5	P1P2	nonessential	CYP3A5_+_99277556.23-P1P2	GACAGCAGCACTCAGCTAAA	1	1	predicted	CYP3A5_+_99277143.23-P1P2	GATCAATGAAAACATGGCAG	2	2	predicted	CYP3A5_+_99277556.23-P1P2|CYP3A5_+_99277143.23-P1P2
UBE2G2	P1P2	significant	UBE2G2_+_46221681.23-P1P2	GCGGCTGAGGCGAGGTCGCT	1	1	empirical	UBE2G2_+_46221718.23-P1P2	GGAAGCAGTCCCCGGTGTCG	2	4	empirical	UBE2G2_+_46221681.23-P1P2|UBE2G2_+_46221718.23-P1P2
INO80B	P1P2	significant	INO80B_-_74682266.23-P1P2	GGAGTAAGCTGTGGCGGCGT	1	3	empirical	INO80B_-_74682279.23-P1P2	GCGGCGTGGGAGCACCTCTG	2	1	empirical	INO80B_-_74682266.23-P1P2|INO80B_-_74682279.23-P1P2
C18orf63	P1P2	nonessential	C18orf63_-_71983085.23-P1P2	GCGAGGGGACACTCCGATGA	2	2	predicted	C18orf63_-_71983049.23-P1P2	GTACTGGGATTGGCTCCCGA	3	3	predicted	C18orf63_-_71983085.23-P1P2|C18orf63_-_71983049.23-P1P2
C8orf33	P1P2	nonessential	C8orf33_-_146277895.23-P1P2	GCGCATGGCGGTGAGCGGTG	1	1	predicted	C8orf33_-_146277883.23-P1P2	GTGGCGACTGCGGCGCATGG	2	2	predicted	C8orf33_-_146277895.23-P1P2|C8orf33_-_146277883.23-P1P2
HSPBAP1	P1P2	nonessential	HSPBAP1_+_122512633.23-P1P2	GAGCCGGGCGGGAGTCGCCG	1	1	predicted	HSPBAP1_+_122512602.23-P1P2	GGTGGTGCAGCTTCGGGTCT	2	2	predicted	HSPBAP1_+_122512633.23-P1P2|HSPBAP1_+_122512602.23-P1P2
SETX	P1P2	nonessential	SETX_+_135230302.23-P1P2	GGCCGACGCCAGCCAGAGAG	1	1	predicted	SETX_+_135230337.23-P1P2	GCCTAGAGCGGGGCCCGGTA	2	2	predicted	SETX_+_135230302.23-P1P2|SETX_+_135230337.23-P1P2
RPL10	P1P2	essential	RPL10_-_153626730.23-P1P2	GAGGAGCGCCTCTTTCCCTT	1	1	essential	RPL10_-_153626735.23-P1P2	GCGCCTCTTTCCCTTCGGTG	2	2	essential	RPL10_-_153626730.23-P1P2|RPL10_-_153626735.23-P1P2
PPAN-P2RY11	P1P2	essential	PPAN-P2RY11_-_10217084.23-P1P2	GCAGCAGCATGGGACAGTCA	1	3	essential	PPAN-P2RY11_-_10217074.23-P1P2	GGTGGAGGACACAGCAGCAT	2	4	essential	PPAN-P2RY11_-_10217084.23-P1P2|PPAN-P2RY11_-_10217074.23-P1P2
RRP12	P1P2	essential	RRP12_+_99161057.23-P1P2	GGGCTACAGGGTATCCACGT	1	2	essential	RRP12_-_99161036.23-P1P2	GCTTAAATGACCGGCTTCCA	2	4	essential	RRP12_+_99161057.23-P1P2|RRP12_-_99161036.23-P1P2
AVPR1B	P1P2	nonessential	AVPR1B_-_206223975.23-P1P2	GGCTCACCAGGCAGAGCGAG	1	1	predicted	AVPR1B_-_206223987.23-P1P2	GGAGCGAGCGGGCTTGGCTG	2	2	predicted	AVPR1B_-_206223975.23-P1P2|AVPR1B_-_206223987.23-P1P2
CAV2	P1P2	nonessential	CAV2_-_116139840.23-P1P2	GGCGCACCAAGGCTGCGATG	1	1	predicted	CAV2_-_116139829.23-P1P2	GCTGCAGCGGCCGCGCACCA	2	2	predicted	CAV2_-_116139840.23-P1P2|CAV2_-_116139829.23-P1P2
ADAMTSL5	P1P2	nonessential	ADAMTSL5_-_1512947.23-P1P2	GCCGGAGAAAGTGGGAGGAT	1	1	predicted	ADAMTSL5_-_1512963.23-P1P2	GGATAGGCAGATGGACTTAC	2	2	predicted	ADAMTSL5_-_1512947.23-P1P2|ADAMTSL5_-_1512963.23-P1P2
GGT2	ENST00000424627.1	nonessential	GGT2_+_21580554.23-ENST00000424627.1	GGACCTTCAGGAGAACGAGA	1	1	predicted	GGT2_+_21580517.23-ENST00000424627.1	GGTCTCTGAAGAAGATTCTG	2	2	predicted	GGT2_+_21580554.23-ENST00000424627.1|GGT2_+_21580517.23-ENST00000424627.1
TIAM2	ENST00000461783.3	nonessential	TIAM2_-_155153884.23-ENST00000461783.3	GCGGCCTCCACTAGATGGTA	1	1	predicted	TIAM2_-_155153879.23-ENST00000461783.3	GCTGGACGGCCTCCACTAGA	2	2	predicted	TIAM2_-_155153884.23-ENST00000461783.3|TIAM2_-_155153879.23-ENST00000461783.3
ZNF253	P1P2	nonessential	ZNF253_-_19976741.23-P1P2	GTATAGAGGCCCGTCCTCTG	1	1	predicted	ZNF253_+_19976912.23-P1P2	GTGGGCAGGGAGAACTCCGG	2	2	predicted	ZNF253_-_19976741.23-P1P2|ZNF253_+_19976912.23-P1P2
ZNF844	P1P2	nonessential	ZNF844_+_12175579.23-P1P2	GTCTCAGAGCAGGAAAAACG	1	1	predicted	ZNF844_+_12175618.23-P1P2	GCGACAGGGCGACAGAAGTA	2	2	predicted	ZNF844_+_12175579.23-P1P2|ZNF844_+_12175618.23-P1P2
GCHFR	P1P2	nonessential	GCHFR_-_41056319.23-P1P2	GCGCAGTCCCGACGCGAGAA	1	1	predicted	GCHFR_-_41056353.23-P1P2	GTCCAGCCTAGAGCCCCCGG	2	2	predicted	GCHFR_-_41056319.23-P1P2|GCHFR_-_41056353.23-P1P2
KCNB2	P1P2	nonessential	KCNB2_-_73449256.23-P1P2	GCCGGCCGAGCGCACAGCTC	1	1	predicted	KCNB2_+_73449281.23-P1P2	GAGCCGGCAGCGCACCGCCG	2	2	predicted	KCNB2_-_73449256.23-P1P2|KCNB2_+_73449281.23-P1P2
MAN2B2	P1P2	nonessential	MAN2B2_-_6576942.23-P1P2	GCCGGCCTGCCGCAGGGATG	1	1	predicted	MAN2B2_-_6576936.23-P1P2	GACCTTCCCGGCCTGCCGCA	2	2	predicted	MAN2B2_-_6576942.23-P1P2|MAN2B2_-_6576936.23-P1P2
RPL27A	P1P2	essential	RPL27A_-_8704363.23-P1P2	GTTCGTCTGGGCTGCCAACA	1	5	essential	RPL27A_-_8704367.23-P1P2	GTCTGGGCTGCCAACATGGT	2	3	essential	RPL27A_-_8704363.23-P1P2|RPL27A_-_8704367.23-P1P2
MYO5A	P1P2	nonessential	MYO5A_-_52821073.23-P1P2	GGCCTGGGCGGCCGCCCGAG	1	1	predicted	MYO5A_-_52821079.23-P1P2	GGCGGCCGCCCGAGCGGACT	2	2	predicted	MYO5A_-_52821073.23-P1P2|MYO5A_-_52821079.23-P1P2
LINGO3	P1P2	nonessential	LINGO3_+_2308129.23-P1P2	GcggcggcggcTGCTCGTGT	1	1	predicted	LINGO3_+_2308087.23-P1P2	GgcagcccgcgccgTGTCCG	2	2	predicted	LINGO3_+_2308129.23-P1P2|LINGO3_+_2308087.23-P1P2
CST5	P1P2	nonessential	CST5_-_23860092.23-P1P2	GGTAGCACGCACCTGCTGGT	1	1	predicted	CST5_-_23859940.23-P1P2	GACGGCCAAGGAGTGTCCTA	2	2	predicted	CST5_-_23860092.23-P1P2|CST5_-_23859940.23-P1P2
CHURC1-FNTB	P1P2	nonessential	CHURC1-FNTB_-_65381231.23-P1P2	GGCGATGTGTGGCGACTGTG	1	1	predicted	CHURC1-FNTB_+_65381194.23-P1P2	GCATCGCGACGCAGTCAACA	2	2	predicted	CHURC1-FNTB_-_65381231.23-P1P2|CHURC1-FNTB_+_65381194.23-P1P2
UROS	P1P2	significant	UROS_-_127511786.23-P1P2	GGACCCCGCACCTCAGACTG	1	1	predicted	UROS_+_127511774.23-P1P2	GCCCACGCGACCCCAGTCTG	2	2	predicted	UROS_-_127511786.23-P1P2|UROS_+_127511774.23-P1P2
BRMS1L	P1P2	nonessential	BRMS1L_-_36295638.23-P1P2	GGCAAGCTCGGTGGCTGGGT	1	1	predicted	BRMS1L_+_36295656.23-P1P2	GCCACCGCCGCTTCAATGAA	2	2	predicted	BRMS1L_-_36295638.23-P1P2|BRMS1L_+_36295656.23-P1P2
UBXN2A	P2	nonessential	UBXN2A_-_24150387.23-P2	GGGAATCCCCAAGCTACCCG	1	1	predicted	UBXN2A_+_24150192.23-P2	GGAACTCGTCCTGATTAGTC	2	2	predicted	UBXN2A_-_24150387.23-P2|UBXN2A_+_24150192.23-P2
ARHGAP35	ENST00000404338.3	nonessential	ARHGAP35_-_47421941.23-ENST00000404338.3	GGATGTGTCGACGATGATGA	1	1	predicted	ARHGAP35_-_47422000.23-ENST00000404338.3	GCAGTGTGGTGGGATTATCT	2	2	predicted	ARHGAP35_-_47421941.23-ENST00000404338.3|ARHGAP35_-_47422000.23-ENST00000404338.3
PIF1	P2	significant	PIF1_-_65116192.23-P2	GGCGCAATGTGCGCAGGAAG	1	2	empirical	PIF1_+_65115956.23-P2	GCAGTGAGGACGGGAAAGAA	2	3	empirical	PIF1_-_65116192.23-P2|PIF1_+_65115956.23-P2
KLHL34	P1P2	nonessential	KLHL34_-_21676409.23-P1P2	GCTCTCCGGGGTGGACGAGG	1	1	predicted	KLHL34_-_21676374.23-P1P2	GGCGGCGTCCCGGGAGTGCA	2	2	predicted	KLHL34_-_21676409.23-P1P2|KLHL34_-_21676374.23-P1P2
MRPS24	P1P2	significant	MRPS24_+_43909046.23-P1P2	GGCTGGGGCCACGGGTGAGT	1	3	empirical	MRPS24_-_43909060.23-P1P2	GGAGTCGCCCCACTCACCCG	2	2	empirical	MRPS24_+_43909046.23-P1P2|MRPS24_-_43909060.23-P1P2
IL13	P2	nonessential	IL13_+_131992232.23-P2	GAAGCCCTGCCGGGAGCGGT	1	1	predicted	IL13_-_131992431.23-P2	GGGGTCACACGGCCAAGTAG	2	2	predicted	IL13_+_131992232.23-P2|IL13_-_131992431.23-P2
CD59	P2	nonessential	CD59_+_33728005.23-P2	Gtgtaaagggtctgccagat	1	1	predicted	CD59_+_33727664.23-P2	GGGTCCAGAGCCTCTGGGAG	2	2	predicted	CD59_+_33728005.23-P2|CD59_+_33727664.23-P2
GOLGA7B	P1P2	significant	GOLGA7B_-_99609645.23-P1P2	GGGGCGGGGCTCCTCTCCGG	1	1	empirical	GOLGA7B_+_99609867.23-P1P2	GggcggcTGGGTCCAGGCAA	2	2	predicted	GOLGA7B_-_99609645.23-P1P2|GOLGA7B_+_99609867.23-P1P2
AARSD1	P1	nonessential	AARSD1_-_41116425.23-P1	GCCGTGACGCCGTACCTCTC	1	1	predicted	AARSD1_+_41116412.23-P1	GCAGTTATGCCCGAGAGGTA	2	2	predicted	AARSD1_-_41116425.23-P1|AARSD1_+_41116412.23-P1
RPL9	P1P2	essential	RPL9_+_39460504.23-P1P2	GCTGCGTCTACTGCGAGGTA	1	2	essential	RPL9_+_39460483.23-P1P2	GGATGTTTCTGTGCTCGTGG	2	1	essential	RPL9_+_39460504.23-P1P2|RPL9_+_39460483.23-P1P2
PYCR1	P1P2	nonessential	PYCR1_+_79895132.23-P1P2	GGGCCGCAGCGCTGAGGGGT	1	1	predicted	PYCR1_-_79894942.23-P1P2	GGGTCCCGCACCCACTGGAG	2	2	predicted	PYCR1_+_79895132.23-P1P2|PYCR1_-_79894942.23-P1P2
B3GNT5	P1P2	nonessential	B3GNT5_+_182971087.23-P1P2	GTCTTGGGCGAGGACTGGAC	1	1	predicted	B3GNT5_+_182971138.23-P1P2	GGCATCGGAGCTAAAGTCGC	2	2	predicted	B3GNT5_+_182971087.23-P1P2|B3GNT5_+_182971138.23-P1P2
CNKSR2	P1P2	nonessential	CNKSR2_-_21392604.23-P1P2	GGTGAGGCGAGCGGGCAAGT	1	1	predicted	CNKSR2_-_21392706.23-P1P2	GGACGGAGACCGGAGCGGAG	2	2	predicted	CNKSR2_-_21392604.23-P1P2|CNKSR2_-_21392706.23-P1P2
LUC7L2	P2	significant	LUC7L2_+_139026137.23-P2	GGTGTGCGACGGGGACCCTA	1	1	predicted	LUC7L2_-_139026126.23-P2	GACCACGCTCGGAGAAGGAC	2	2	predicted	LUC7L2_+_139026137.23-P2|LUC7L2_-_139026126.23-P2
HNRNPUL2	P1P2	nonessential	HNRNPUL2_+_62494658.23-P1P2	Gcgacggttcgcaggggagg	1	1	predicted	HNRNPUL2_+_62494886.23-P1P2	GCCCGCGGCTGGGGAACCAA	2	2	predicted	HNRNPUL2_+_62494658.23-P1P2|HNRNPUL2_+_62494886.23-P1P2
TTC1	P1P2	essential	TTC1_-_159436216.23-P1P2	GAGGTTGTGAGTAACCCCGT	1	1	essential	TTC1_-_159436177.23-P1P2	GCTCTCAGAGGCTAAGAAGG	2	4	essential	TTC1_-_159436216.23-P1P2|TTC1_-_159436177.23-P1P2
TFAM	P1P2	significant	TFAM_+_60145205.23-P1P2	GGAACCCGCGTGCGACCCTC	1	2	empirical	TFAM_-_60145223.23-P1P2	GACGCCGGAGGGTCGCACGC	2	3	empirical	TFAM_+_60145205.23-P1P2|TFAM_-_60145223.23-P1P2
LAMP3	P1P2	nonessential	LAMP3_-_182880448.23-P1P2	GTGAGCTGCCGGGGCATGGT	1	1	predicted	LAMP3_-_182880501.23-P1P2	GGTCCGGGCAGGCCCCGAAT	2	2	predicted	LAMP3_-_182880448.23-P1P2|LAMP3_-_182880501.23-P1P2
TREM2	P1P2	nonessential	TREM2_-_41130813.23-P1P2	GGTAAGATGAGCAGCCGGAG	1	1	predicted	TREM2_-_41130625.23-P1P2	GAGGAGGGTGTGAAGAATAT	2	2	predicted	TREM2_-_41130813.23-P1P2|TREM2_-_41130625.23-P1P2
ZNF763	P1P2	nonessential	ZNF763_+_12035921.23-P1P2	GCCGCGCAGCGAGGAAGGTG	1	1	predicted	ZNF763_-_12035979.23-P1P2	GCGGTCAGACCAGCCCGAGA	2	2	predicted	ZNF763_+_12035921.23-P1P2|ZNF763_-_12035979.23-P1P2
OCM	ENST00000416608.1	nonessential	OCM_+_5919746.23-ENST00000416608.1	GGGCATGCACCTGTCCTGAA	1	1	predicted	OCM_-_5919697.23-ENST00000416608.1	GTTCCGGTGGCTCTGACACC	2	2	predicted	OCM_+_5919746.23-ENST00000416608.1|OCM_-_5919697.23-ENST00000416608.1
RPL36A	P1P2	essential	RPL36A_-_100646038.23-P1P2	GGCGCTCACGCAAGCATGGT	1	1	essential	RPL36A_-_100646053.23-P1P2	GTGGTAGGACTTGCTGGTGG	2	3	essential	RPL36A_-_100646038.23-P1P2|RPL36A_-_100646053.23-P1P2
TFF1	P1P2	nonessential	TFF1_-_43786572.23-P1P2	GAGCATGGACACCAGGACCA	1	1	predicted	TFF1_-_43786649.23-P1P2	GACCCCGAGTCAGGGATGAG	2	2	predicted	TFF1_-_43786572.23-P1P2|TFF1_-_43786649.23-P1P2
MRPL3	P1P2	essential	MRPL3_+_131221797.23-P1P2	GCGTCGCAGAGAGCATCGGC	1	5	essential	MRPL3_+_131221782.23-P1P2	GCGGCCGGCGACCGTTCCGG	2	7	essential	MRPL3_+_131221797.23-P1P2|MRPL3_+_131221782.23-P1P2
SLC35F1	P1P2	nonessential	SLC35F1_-_118228469.23-P1P2	GAGCGGGGCACAGGCTGAGG	1	1	predicted	SLC35F1_+_118228401.23-P1P2	GTCACGGAGTGAGAGACCGA	2	2	predicted	SLC35F1_-_118228469.23-P1P2|SLC35F1_+_118228401.23-P1P2
DPY19L4	P1P2	nonessential	DPY19L4_-_95732145.23-P1P2	GGCCAGGAGCGGGCCCCCGG	1	1	predicted	DPY19L4_-_95732174.23-P1P2	GGTTCGGCGACGCGGAGGGA	2	2	predicted	DPY19L4_-_95732145.23-P1P2|DPY19L4_-_95732174.23-P1P2
FAM71F1	P1	nonessential	FAM71F1_+_128349172.23-P1	Gtgagctctgggtcctcagg	1	1	predicted	FAM71F1_-_128349156.23-P1	Gcaggatgcagacataatga	2	2	predicted	FAM71F1_+_128349172.23-P1|FAM71F1_-_128349156.23-P1
SLC16A5	P1P2	significant	SLC16A5_-_73084484.23-P1P2	GAGCACTGCGGGGATGGGCA	1	8	empirical	SLC16A5_-_73084264.23-P1P2	GGCCTGGGCGGGCTCAGTGG	2	2	empirical	SLC16A5_-_73084484.23-P1P2|SLC16A5_-_73084264.23-P1P2
ACTN4	P1P2	nonessential	ACTN4_-_39138358.23-P1P2	GagctgaggcgggagcggAC	1	1	predicted	ACTN4_-_39138303.23-P1P2	Gcgggctgaagcagctgaag	2	2	predicted	ACTN4_-_39138358.23-P1P2|ACTN4_-_39138303.23-P1P2
ALDH1A3	P1	significant	ALDH1A3_-_101419689.23-P1	GCCCGACTTCGGGGAGGCAG	1	2	empirical	ALDH1A3_-_101419642.23-P1	GCCGTGCGGCGGCTGGGAGT	2	1	empirical	ALDH1A3_-_101419689.23-P1|ALDH1A3_-_101419642.23-P1
BCAP31	P1P2	nonessential	BCAP31_+_152989795.23-P1P2	GGGGCCTGCACGTTGACTGT	1	1	predicted	BCAP31_+_152989855.23-P1P2	GCCGGCCGCGGTATGAGGGG	2	2	predicted	BCAP31_+_152989795.23-P1P2|BCAP31_+_152989855.23-P1P2
ZNF416	P1P2	nonessential	ZNF416_-_58090220.23-P1P2	GGCAGCGTTTCTAACTCAGG	1	1	predicted	ZNF416_+_58090180.23-P1P2	GTGCCTCCGGCACAGAGCGG	2	2	predicted	ZNF416_-_58090220.23-P1P2|ZNF416_+_58090180.23-P1P2
DDA1	P1P2	significant	DDA1_-_17420411.23-P1P2	Ggctaagaaggcggctctgg	1	2	empirical	DDA1_-_17420399.23-P1P2	GTGTGAggcggcggctaaga	2	5	empirical	DDA1_-_17420411.23-P1P2|DDA1_-_17420399.23-P1P2
CGA	P2	nonessential	CGA_-_87797940.23-P2	GGCGCTCCTGCAGACAGACA	1	1	predicted	CGA_+_87797914.23-P2	GTCTGTCTGCAGGAGCGCCA	2	2	predicted	CGA_-_87797940.23-P2|CGA_+_87797914.23-P2
TNP2	P1P2	nonessential	TNP2_-_11363139.23-P1P2	GTAGGAGGCCACGTTTGGAG	1	1	predicted	TNP2_+_11363157.23-P1P2	GAAGCTAGGCCTGCTGGGAG	2	2	predicted	TNP2_-_11363139.23-P1P2|TNP2_+_11363157.23-P1P2
ZNF679	P1P2	nonessential	ZNF679_+_63709363.23-P1P2	GAGGACCCGGAAAATTACGG	1	1	predicted	ZNF679_+_63709376.23-P1P2	GCAGAGAAACACAAAGGACC	2	2	predicted	ZNF679_+_63709363.23-P1P2|ZNF679_+_63709376.23-P1P2
NLGN4Y	P2	nonessential	NLGN4Y_+_16634547.23-P2	GGCAGGAAAGGCCGAGCTAG	1	1	predicted	NLGN4Y_-_16634716.23-P2	GCCCGAAGGGGAAGGCGCCT	2	2	predicted	NLGN4Y_+_16634547.23-P2|NLGN4Y_-_16634716.23-P2
GNAL	ENST00000269162.5,ENST00000535121.1	nonessential	GNAL_+_11751729.23-ENST00000269162.5,ENST00000535121.1	GTCAGGGAGCTGACCCCCCA	1	1	predicted	GNAL_+_11751554.23-ENST00000269162.5,ENST00000535121.1	GCCTGGCGGGCGAAGACTCG	2	2	predicted	GNAL_+_11751729.23-ENST00000269162.5,ENST00000535121.1|GNAL_+_11751554.23-ENST00000269162.5,ENST00000535121.1
SH2D1B	P1P2	nonessential	SH2D1B_-_162381683.23-P1P2	GGGCTACTCACGAGACACAG	1	1	predicted	SH2D1B_+_162381915.23-P1P2	GCACAGACCGCTAGAGGAAG	2	2	predicted	SH2D1B_-_162381683.23-P1P2|SH2D1B_+_162381915.23-P1P2
LRRC29	P1P2	nonessential	LRRC29_-_67260862.23-P1P2	GTGTCCAGAGCTAGGCCTGA	1	1	predicted	LRRC29_+_67260876.23-P1P2	GGCGGAGTCGCTGCCCCTGG	2	2	predicted	LRRC29_-_67260862.23-P1P2|LRRC29_+_67260876.23-P1P2
KLK10	P1P2	nonessential	KLK10_+_51522946.23-P1P2	GCCTGGGCAGAGGATACCAG	1	1	predicted	KLK10_+_51522930.23-P1P2	GCAGCGGCAGACCACAGGCA	2	2	predicted	KLK10_+_51522946.23-P1P2|KLK10_+_51522930.23-P1P2
SLC6A15	P1P2	nonessential	SLC6A15_+_85306508.23-P1P2	GGTTTCCCTGGCAGACACAC	1	1	predicted	SLC6A15_-_85306537.23-P1P2	GTCTGCCAGGGAAACAGCAC	2	2	predicted	SLC6A15_+_85306508.23-P1P2|SLC6A15_-_85306537.23-P1P2
HCFC1R1	P1P2	nonessential	HCFC1R1_-_3073944.23-P1P2	GAGGGCTGCTGCAGGATCAT	1	1	predicted	HCFC1R1_+_3073904.23-P1P2	GCCTTGCAGCGAGGCCCCCA	2	2	predicted	HCFC1R1_-_3073944.23-P1P2|HCFC1R1_+_3073904.23-P1P2
ASGR1	P1P2	nonessential	ASGR1_-_7082627.23-P1P2	GCAGCCGTGGACAATGGGAG	1	1	predicted	ASGR1_-_7082650.23-P1P2	GGCGGGCAGGGTCCATAGGA	2	2	predicted	ASGR1_-_7082627.23-P1P2|ASGR1_-_7082650.23-P1P2
HIST1H1C	P1P2	significant	HIST1H1C_-_26056624.23-P1P2	GGCCTTCTCCGCAGGAGGCG	1	2	empirical	HIST1H1C_+_26056436.23-P1P2	GGCTGCCGCCGGCTATGATG	2	5	empirical	HIST1H1C_-_26056624.23-P1P2|HIST1H1C_+_26056436.23-P1P2
OR7A5	P1P2	nonessential	OR7A5_-_14945954.23-P1P2	GCTCACTGGATGATTGATGG	1	1	predicted	OR7A5_-_14945940.23-P1P2	GGTAAGTGCAAATTCCTCAC	2	2	predicted	OR7A5_-_14945954.23-P1P2|OR7A5_-_14945940.23-P1P2
CCP110	P1P2	significant	CCP110_+_19535267.23-P1P2	GCCGCCATATTACGGATCTC	1	2	empirical	CCP110_-_19535293.23-P1P2	GGATCCGTAATATGGCGGGG	2	1	empirical	CCP110_+_19535267.23-P1P2|CCP110_-_19535293.23-P1P2
BAG2	P1P2	nonessential	BAG2_+_57037166.23-P1P2	GAGTCTCTGAGGCACGGGAG	1	1	predicted	BAG2_+_57037177.23-P1P2	GTGGGGAGCGCAAGTCTCTG	2	2	predicted	BAG2_+_57037166.23-P1P2|BAG2_+_57037177.23-P1P2
RALGPS2	P1P2	nonessential	RALGPS2_-_178694444.23-P1P2	GgcggGCGCTGAATGAGAGA	1	1	predicted	RALGPS2_-_178694396.23-P1P2	GCTCACTCTCCTCCCCCGAg	2	2	predicted	RALGPS2_-_178694444.23-P1P2|RALGPS2_-_178694396.23-P1P2
HIST1H2BK	P1P2	nonessential	HIST1H2BK_-_27114635.23-P1P2	GTCGAGAAAACGGGAAGTAA	1	1	predicted	HIST1H2BK_+_27114158.23-P1P2	GTCTTAAAGCCCAACCCCAA	2	2	predicted	HIST1H2BK_-_27114635.23-P1P2|HIST1H2BK_+_27114158.23-P1P2
RPL10A	P1P2	essential	RPL10A_-_35436407.23-P1P2	GGAGCCTCCCTCTTCCACCG	1	1	essential	RPL10A_-_35436216.23-P1P2	GCGCGGCGTGAGAAGCCATG	2	3	essential	RPL10A_-_35436407.23-P1P2|RPL10A_-_35436216.23-P1P2
C1orf94	P1	nonessential	C1orf94_-_34642563.23-P1	GGAATTCCCCCGCTCGACGA	1	1	predicted	C1orf94_-_34642575.23-P1	GTCGACGACGGCGAGGGTGT	2	2	predicted	C1orf94_-_34642563.23-P1|C1orf94_-_34642575.23-P1
FGF16	ENST00000439435.1	nonessential	FGF16_-_76709747.23-ENST00000439435.1	GTGAGCGAGGAGAACTCTAT	1	1	predicted	FGF16_-_76709751.23-ENST00000439435.1	GCGAGGAGAACTCTATGGGT	2	2	predicted	FGF16_-_76709747.23-ENST00000439435.1|FGF16_-_76709751.23-ENST00000439435.1
TSR1	P1	significant	TSR1_+_2239717.23-P1	GGTACACGCGCGCTGCGGCA	1	1	empirical	TSR1_+_2239506.23-P1	GACGCGAAAGGCCCTTTCTA	2	7	empirical	TSR1_+_2239717.23-P1|TSR1_+_2239506.23-P1
CBLN2	P1P2	nonessential	CBLN2_-_70210738.23-P1P2	GTACCTGGAACATCCATGCT	1	1	predicted	CBLN2_-_70210701.23-P1P2	GCGCTTGCATGCGGAGGGGA	2	2	predicted	CBLN2_-_70210738.23-P1P2|CBLN2_-_70210701.23-P1P2
GSTM2	P1	nonessential	GSTM2_+_110210900.23-P1	GCAGCCACACGCACAGACAG	1	1	predicted	GSTM2_+_110210692.23-P1	GCAGACAGGCCTCAGCGGGG	2	2	predicted	GSTM2_+_110210900.23-P1|GSTM2_+_110210692.23-P1
PDIA6	P1P2	significant	PDIA6_+_10952488.23-P1P2	GCAGCCCCGGCCGGATCCCG	1	3	empirical	PDIA6_+_10952857.23-P1P2	GCGCTGCAGGGCTGAAGCGG	2	1	empirical	PDIA6_+_10952488.23-P1P2|PDIA6_+_10952857.23-P1P2
PLA2G4B	P1	nonessential	PLA2G4B_+_42120320.23-P1	GTCCAAAGCCGCCTCCGCCA	1	1	predicted	PLA2G4B_+_42120527.23-P1	GGCGCGCGAACACGGGAGAA	2	2	predicted	PLA2G4B_+_42120320.23-P1|PLA2G4B_+_42120527.23-P1
MYCN	P1	significant	MYCN_+_16080720.23-P1	GCGGCTCCAACACAGTTCCC	1	1	predicted	MYCN_-_16080870.23-P1	GCTGCAGTCGGCGGGAGGTA	2	2	predicted	MYCN_+_16080720.23-P1|MYCN_-_16080870.23-P1
HDGF	P1P2	nonessential	HDGF_-_156721402.23-P1P2	Gcccgcgcgccgcacggacg	1	1	predicted	HDGF_-_156721429.23-P1P2	GgcggATCGGGGCAAGGCTC	2	2	predicted	HDGF_-_156721402.23-P1P2|HDGF_-_156721429.23-P1P2
PLK2	P1	nonessential	PLK2_+_57755864.23-P1	GTAGTCGGCACCAGAGGCAA	1	1	predicted	PLK2_+_57755850.23-P1	GGGCAAGGGTGCGAGGACCA	2	2	predicted	PLK2_+_57755864.23-P1|PLK2_+_57755850.23-P1
ACSM2B	P1P2	nonessential	ACSM2B_+_20587573.23-P1P2	GAGCTGCTGGCTGGAGAGGA	2	2	predicted	ACSM2B_-_20587615.23-P1P2	GTCCAGAACTCCTACAGCCT	3	3	predicted	ACSM2B_+_20587573.23-P1P2|ACSM2B_-_20587615.23-P1P2
DCTD	P1P2	significant	DCTD_+_183838508.23-P1P2	GCTTCCTTCCCTGAGCACGG	1	1	empirical	DCTD_+_183838462.23-P1P2	GGCGCGGAGCCGGCACCGGA	2	3	empirical	DCTD_+_183838508.23-P1P2|DCTD_+_183838462.23-P1P2
RNF151	P1P2	nonessential	RNF151_-_2016885.23-P1P2	GGCTGTCTAGACGCAGATCA	1	1	predicted	RNF151_-_2016895.23-P1P2	GCGCAGATCATGGTGAGCCT	2	2	predicted	RNF151_-_2016885.23-P1P2|RNF151_-_2016895.23-P1P2
WDR81	P2	significant	WDR81_+_1619899.23-P2	GCGCTGGGTTCTGGGAACGA	1	1	predicted	WDR81_+_1619892.23-P2	GTTCTGGGAACGACGGTGTC	2	2	predicted	WDR81_+_1619899.23-P2|WDR81_+_1619892.23-P2
FAM83C	P1P2	nonessential	FAM83C_+_33880203.23-P1P2	GACACACACAGCGAGCGGGC	1	1	predicted	FAM83C_-_33880001.23-P1P2	GCGCTGTGCCGCAGCACCAG	2	2	predicted	FAM83C_+_33880203.23-P1P2|FAM83C_-_33880001.23-P1P2
MN1	P1P2	nonessential	MN1_-_28197688.23-P1P2	GTCTGCGTGGGGCGTTCCGA	1	1	predicted	MN1_+_28197513.23-P1P2	GGCGTACGCCCCCCTCCCTC	3	3	predicted	MN1_-_28197688.23-P1P2|MN1_+_28197513.23-P1P2
SPAG8	P1P2	nonessential	SPAG8_-_35812136.23-P1P2	GGATCCCTCCGTAGACTCGT	1	1	predicted	SPAG8_+_35812118.23-P1P2	GAGACCAACGAGTCTACGGA	2	2	predicted	SPAG8_-_35812136.23-P1P2|SPAG8_+_35812118.23-P1P2
OR14J1	ENST00000377160.2	nonessential	OR14J1_+_29274412.23-ENST00000377160.2	GTTAGGAAGCCAAAGACAGT	1	1	predicted	OR14J1_-_29274469.23-ENST00000377160.2	GGGTATCTTCAGAGAGACTA	2	2	predicted	OR14J1_+_29274412.23-ENST00000377160.2|OR14J1_-_29274469.23-ENST00000377160.2
EPOR	P1	nonessential	EPOR_+_11491868.23-P1	GCCCAGGTGGAGATCCTGGA	1	1	predicted	EPOR_+_11491872.23-P1	GCGCCCCCAGGTGGAGATCC	2	2	predicted	EPOR_+_11491868.23-P1|EPOR_+_11491872.23-P1
HINT1	P1P2	nonessential	HINT1_-_130500949.23-P1P2	GGAGAGGCTCGGAAGAAGGG	1	1	predicted	HINT1_-_130500946.23-P1P2	GGAGGAGAGGCTCGGAAGAA	2	2	predicted	HINT1_-_130500949.23-P1P2|HINT1_-_130500946.23-P1P2
SMCO1	P1P2	nonessential	SMCO1_+_196242166.23-P1P2	GACTGCTGCCTGTTGCTGAG	1	1	predicted	SMCO1_+_196241995.23-P1P2	GATAGGGAGGGAGCAAGCAT	2	2	predicted	SMCO1_+_196242166.23-P1P2|SMCO1_+_196241995.23-P1P2
H6PD	P2	nonessential	H6PD_+_9299953.23-P2	GAGCTGTCCCCATACAGACC	1	1	predicted	H6PD_-_9299938.23-P2	GGCGGCTAGAGCTTCAGCAC	2	2	predicted	H6PD_+_9299953.23-P2|H6PD_-_9299938.23-P2
CTRL	P1P2	nonessential	CTRL_-_67965728.23-P1P2	GGGAGGAGCCGAGGAGAACC	1	1	predicted	CTRL_-_67965683.23-P1P2	GTGCTCCCAGGGCTGAATCA	2	2	predicted	CTRL_-_67965728.23-P1P2|CTRL_-_67965683.23-P1P2
AGPAT1	P2	significant	AGPAT1_+_32144829.23-P2	GTGAGGATTCAGGAAGCTTG	1	6	empirical	AGPAT1_+_32145529.23-P2	GGGAAAGACGGCGAAGAGCT	1	1	predicted	AGPAT1_+_32144829.23-P2|AGPAT1_+_32145529.23-P2
CD58	P1P2	nonessential	CD58_+_117113590.23-P1P2	GAGGCCGGCCCGACGAGCCA	1	1	predicted	CD58_+_117113609.23-P1P2	GTGGCTGGGCACTCGCGCAG	2	2	predicted	CD58_+_117113590.23-P1P2|CD58_+_117113609.23-P1P2
CDKN1C	P1P2	significant	CDKN1C_-_2906877.23-P1P2	GCGGCTACCTGGCTGTCCGG	1	4	empirical	CDKN1C_+_2906998.23-P1P2	GGGCGGGCTGGGCGTTCCAC	2	8	empirical	CDKN1C_-_2906877.23-P1P2|CDKN1C_+_2906998.23-P1P2
DPH7	P1P2	significant	DPH7_-_140473304.23-P1P2	GGGCTGGGTACTgcgcgggg	1	2	empirical	DPH7_-_140473343.23-P1P2	GggACGAGCGCAGAGCCCCA	2	1	empirical	DPH7_-_140473304.23-P1P2|DPH7_-_140473343.23-P1P2
NEU2	ENST00000233840.3	nonessential	NEU2_+_233897436.23-ENST00000233840.3	GAGCAGGGCAGGGATTCTGT	1	1	predicted	NEU2_+_233897430.23-ENST00000233840.3	GGCAGGGATTCTGTAGGCAT	2	2	predicted	NEU2_+_233897436.23-ENST00000233840.3|NEU2_+_233897430.23-ENST00000233840.3
USP44	P2	nonessential	USP44_+_95945108.23-P2	GGAAACTGGGCGATCCTGCA	1	1	predicted	USP44_-_95945137.23-P2	GGATCGCCCAGTTTCCATCA	2	2	predicted	USP44_+_95945108.23-P2|USP44_-_95945137.23-P2
NKPD1	P1P2	nonessential	NKPD1_-_45656779.23-P1P2	GGGGCAGTGCGCCATAGTGG	1	1	predicted	NKPD1_+_45656994.23-P1P2	GGCCGCGCAGCGCGAGAGCG	2	2	predicted	NKPD1_-_45656779.23-P1P2|NKPD1_+_45656994.23-P1P2
ASPM	P1P2	significant	ASPM_+_197115513.23-P1P2	Gggaagtgagcccgaccgag	1	7	empirical	ASPM_-_197115391.23-P1P2	GGCCAGAGACAGCGTCCGTG	2	6	empirical	ASPM_+_197115513.23-P1P2|ASPM_-_197115391.23-P1P2
ATRIP	P1P2	significant	ATRIP_-_48488199.23-P1P2	GGTCCAGTTCTCCGGCCTGG	1	5	empirical	ATRIP_-_48488160.23-P1P2	GCACTCGCGGCGGAGGCAAG	2	1	empirical	ATRIP_-_48488199.23-P1P2|ATRIP_-_48488160.23-P1P2
NF1	P1P2	significant	NF1_-_29422451.23-P1P2	GTGGGGACAGAGTAGGTGAG	1	3	empirical	NF1_+_29421971.23-P1P2	GGGATCCTTTCCACGGCCCG	2	1	empirical	NF1_-_29422451.23-P1P2|NF1_+_29421971.23-P1P2
PRR22	P1P2	nonessential	PRR22_+_5784465.23-P1P2	GCTAAGGGCCCTACCCACCT	1	1	predicted	PRR22_-_5784699.23-P1P2	GCGGGGGGCCCGGTCCAGAC	2	2	predicted	PRR22_+_5784465.23-P1P2|PRR22_-_5784699.23-P1P2
GTSCR1	P1P2	nonessential	GTSCR1_-_68318165.23-P1P2	GGGGGTGAGGGAGCATGATA	1	1	predicted	GTSCR1_-_68318096.23-P1P2	GgcaGAGACCTAGATGCAGA	2	2	predicted	GTSCR1_-_68318165.23-P1P2|GTSCR1_-_68318096.23-P1P2
SLC4A4	P1P2	nonessential	SLC4A4_-_72053002.23-P1P2	GGCGCCGGGCAGCGCTTcgg	1	1	predicted	SLC4A4_+_72053066.23-P1P2	GAGTTTGGCGGCGGAGTGTG	2	2	predicted	SLC4A4_-_72053002.23-P1P2|SLC4A4_+_72053066.23-P1P2
PDIA3	P1P2	nonessential	PDIA3_-_44038657.23-P1P2	GGACGCGCGAGCGCAAGCAG	1	1	predicted	PDIA3_-_44038665.23-P1P2	GAGCGCAAGCAGCGGGTTAG	2	2	predicted	PDIA3_-_44038657.23-P1P2|PDIA3_-_44038665.23-P1P2
GAP43	P1P2	nonessential	GAP43_-_115342461.23-P1P2	Ggagcaagcgagcagaaaag	1	1	predicted	GAP43_+_115342664.23-P1P2	GTAAGGAAGCGCGAGCACCA	2	2	predicted	GAP43_-_115342461.23-P1P2|GAP43_+_115342664.23-P1P2
CMIP	P1P2	significant	CMIP_-_81478778.23-P1P2	Gtgcgggccgccggatccgg	1	1	empirical	CMIP_+_81478592.23-P1P2	GGTCGGGTGCATGCTCGCGG	2	5	empirical	CMIP_-_81478778.23-P1P2|CMIP_+_81478592.23-P1P2
CUL7	P1P2	significant	CUL7_-_43021163.23-P1P2	GCAGGGTGCACAGACCAGGT	1	4	empirical	CUL7_-_43021528.23-P1P2	GGAGCTGCACCCGCGTGAGT	1	1	predicted	CUL7_-_43021163.23-P1P2|CUL7_-_43021528.23-P1P2
RAPGEF5	ENST00000344041.6	nonessential	RAPGEF5_+_22396735.23-ENST00000344041.6	GTTCCTGGCGAAGGCGCGGA	1	1	predicted	RAPGEF5_+_22396680.23-ENST00000344041.6	GCGGCGCCGCAGCGCCGTCA	2	2	predicted	RAPGEF5_+_22396735.23-ENST00000344041.6|RAPGEF5_+_22396680.23-ENST00000344041.6
TMEM180	P1P2	nonessential	TMEM180_+_104221174.23-P1P2	GCCGGCGAAGCCTAATCCCA	1	1	predicted	TMEM180_-_104221207.23-P1P2	GGCTTCGCCGGCTACGATTG	2	2	predicted	TMEM180_+_104221174.23-P1P2|TMEM180_-_104221207.23-P1P2
ALS2	P1P2	significant	ALS2_+_202645584.23-P1P2	GGCTTCAGGTGAGCGAGTGT	1	2	empirical	ALS2_-_202645613.23-P1P2	GCGCTCACCTGAAGCTCCAC	2	1	empirical	ALS2_+_202645584.23-P1P2|ALS2_-_202645613.23-P1P2
TNFSF10	P1P2	significant	TNFSF10_+_172241151.23-P1P2	GTGGCTATGATGGAGGTCCA	1	2	empirical	TNFSF10_+_172241148.23-P1P2	GCTATGATGGAGGTCCAGGG	1	1	predicted	TNFSF10_+_172241151.23-P1P2|TNFSF10_+_172241148.23-P1P2
PLCB1	P1P2	nonessential	PLCB1_+_8112924.23-P1P2	GGCACATCCTCTATACACAG	1	1	predicted	PLCB1_-_8112967.23-P1P2	GTGAATGGTGCGCTTTGAGG	2	2	predicted	PLCB1_+_8112924.23-P1P2|PLCB1_-_8112967.23-P1P2
MCOLN2	P1P2	nonessential	MCOLN2_-_85462773.23-P1P2	GAGTGCGGCGGGCAGTTCTC	1	1	predicted	MCOLN2_-_85462787.23-P1P2	GTTCTCGGGCGGCTGAAAGG	2	2	predicted	MCOLN2_-_85462773.23-P1P2|MCOLN2_-_85462787.23-P1P2
SETBP1	P1P2	nonessential	SETBP1_-_42260108.23-P1P2	GATCTCTCTCCATAAATCGG	1	1	predicted	SETBP1_-_42260119.23-P1P2	GTAAATCGGTGGCGCGGCGG	2	2	predicted	SETBP1_-_42260108.23-P1P2|SETBP1_-_42260119.23-P1P2
GPR107	P1P2	significant	GPR107_-_132816044.23-P1P2	GGATCGAAGGGCCCCGAGGT	1	2	empirical	GPR107_-_132816233.23-P1P2	GTGGCCGCTCTGGCGCCCGT	2	3	empirical	GPR107_-_132816044.23-P1P2|GPR107_-_132816233.23-P1P2
FAM84A	P1P2	nonessential	FAM84A_-_14772870.23-P1P2	GCCGAGCCGGGACTGTCCAG	1	1	predicted	FAM84A_-_14772911.23-P1P2	GCGCAGACCTGGAGGCGCAC	2	2	predicted	FAM84A_-_14772870.23-P1P2|FAM84A_-_14772911.23-P1P2
MEST	P1	nonessential	MEST_-_130131963.23-P1	GCACCCCGGCACCTCCTCTG	1	1	predicted	MEST_+_130132000.23-P1	GcgggcAGCTACAGCCACTC	2	2	predicted	MEST_-_130131963.23-P1|MEST_+_130132000.23-P1
SMTNL1	ENST00000399154.2	nonessential	SMTNL1_-_57310221.23-ENST00000399154.2	GCCCCTGCAGAGGAGACCAA	1	1	predicted	SMTNL1_-_57310191.23-ENST00000399154.2	GCGGACAACCCTGAGATGTC	2	2	predicted	SMTNL1_-_57310221.23-ENST00000399154.2|SMTNL1_-_57310191.23-ENST00000399154.2
ASXL3	P1P2	nonessential	ASXL3_-_31158240.23-P1P2	GCCCGGAGCTGTCACCGCAG	1	1	predicted	ASXL3_-_31158223.23-P1P2	GGGGCCGAGCGGAGCATCCC	2	2	predicted	ASXL3_-_31158240.23-P1P2|ASXL3_-_31158223.23-P1P2
WEE1	P1P2	significant	WEE1_+_9595254.23-P1P2	GCGGGGCGGCCCGAGCACCG	1	1	empirical	WEE1_-_9595630.23-P1P2	GgGCAGCGGCCACAGCACCG	2	4	empirical	WEE1_+_9595254.23-P1P2|WEE1_-_9595630.23-P1P2
TMIE	P1P2	nonessential	TMIE_-_46742847.23-P1P2	GgcgcgggAACCTGACACCG	1	1	predicted	TMIE_-_46742790.23-P1P2	GCGATCTCCCGGGAAGGAGG	2	2	predicted	TMIE_-_46742847.23-P1P2|TMIE_-_46742790.23-P1P2
POGZ	P1P2	significant	POGZ_+_151431895.23-P1P2	GCCGCGCCAGCTCCCGTACA	1	5	empirical	POGZ_+_151431645.23-P1P2	GCTTCCTCGGGTCAGACTAC	2	2	empirical	POGZ_+_151431895.23-P1P2|POGZ_+_151431645.23-P1P2
ATXN2L	P1P2	nonessential	ATXN2L_+_28834351.23-P1P2	GCGGCTGGAGGAAAGCGAGA	1	1	predicted	ATXN2L_+_28834385.23-P1P2	GGAAGCGCCGCGAGGCGGAA	2	2	predicted	ATXN2L_+_28834351.23-P1P2|ATXN2L_+_28834385.23-P1P2
EVPLL	P1P2	nonessential	EVPLL_-_18281335.23-P1P2	GATGGGGAGCCAGGGAGCTA	1	1	predicted	EVPLL_+_18281152.23-P1P2	GGGCTGGGCTTGGCTGGTGA	2	2	predicted	EVPLL_-_18281335.23-P1P2|EVPLL_+_18281152.23-P1P2
TDRD1	P1P2	nonessential	TDRD1_-_115939091.23-P1P2	GGTGCAGGGCGCATCCCAGG	1	1	predicted	TDRD1_-_115939077.23-P1P2	GTGGAGGCGAGGGAAGTGCA	2	2	predicted	TDRD1_-_115939091.23-P1P2|TDRD1_-_115939077.23-P1P2
ACSS3	P1P2	nonessential	ACSS3_-_81471913.23-P1P2	GGGAGGAGATGAAACCGTCT	1	1	predicted	ACSS3_-_81471886.23-P1P2	GTCGCACACTCGGGGACCGC	2	2	predicted	ACSS3_-_81471913.23-P1P2|ACSS3_-_81471886.23-P1P2
CDKL1	P1P2	nonessential	CDKL1_+_50863588.23-P1P2	Gcacgccgagccgagctggg	1	1	predicted	CDKL1_-_50863563.23-P1P2	GGCGCCGCGGCGGTCAGGGA	2	2	predicted	CDKL1_+_50863588.23-P1P2|CDKL1_-_50863563.23-P1P2
RUNX3	P2	nonessential	RUNX3_+_25291473.23-P2	GTCATTCCCCGTGGCACTGG	1	1	predicted	RUNX3_+_25291509.23-P2	GAGAGCCTGGGCTCTGTCAA	2	2	predicted	RUNX3_+_25291473.23-P2|RUNX3_+_25291509.23-P2
ESF1	P1	essential	ESF1_+_13765524.23-P1	GGGCTTGGTAGGACTGCGGA	1	5	essential	ESF1_+_13765535.23-P1	GGCCCCACGTGAGGCTTGGT	2	3	essential	ESF1_+_13765524.23-P1|ESF1_+_13765535.23-P1
ARRDC5	P1P2	nonessential	ARRDC5_-_4902803.23-P1P2	GCCAGGTAGATTCTATCCTC	1	1	predicted	ARRDC5_+_4902700.23-P1P2	GTAGTGAAGGTGGAGCTCGT	2	2	predicted	ARRDC5_-_4902803.23-P1P2|ARRDC5_+_4902700.23-P1P2
FPR1	P1P2	nonessential	FPR1_-_52255125.23-P1P2	GTCTAGGTCTGGGTCTCCTG	1	1	predicted	FPR1_-_52255109.23-P1P2	GTCTTGCTCTGGGTAGTTCT	2	2	predicted	FPR1_-_52255125.23-P1P2|FPR1_-_52255109.23-P1P2
GPR158	P1P2	nonessential	GPR158_+_25463755.23-P1P2	GCGGAGTAGCGAAGGCCGGG	1	1	predicted	GPR158_-_25463932.23-P1P2	GCCTGCGGCGGGTGAGACTA	2	2	predicted	GPR158_+_25463755.23-P1P2|GPR158_-_25463932.23-P1P2
CNTRL	P1P2	nonessential	CNTRL_+_123837287.23-P1P2	GGGTAGAGCGGGAGAAGTTC	1	1	predicted	CNTRL_+_123837298.23-P1P2	GCCGCAGGCTGAGGTAGAGC	2	2	predicted	CNTRL_+_123837287.23-P1P2|CNTRL_+_123837298.23-P1P2
FOXD4L1	ENST00000306507.5	nonessential	FOXD4L1_+_114256774.23-ENST00000306507.5	GCCGATCACCTGGCCCGGGG	1	1	predicted	FOXD4L1_+_114256778.23-ENST00000306507.5	GGCGGCCGATCACCTGGCCC	2	2	predicted	FOXD4L1_+_114256774.23-ENST00000306507.5|FOXD4L1_+_114256778.23-ENST00000306507.5
THOC6	P1P2	significant	THOC6_-_3074073.23-P1P2	GCGCGGGCGCGGAAGACGGG	1	1	empirical	THOC6_+_3074256.23-P1P2	GAGGCCTTACGTGCCTAGAG	2	2	empirical	THOC6_-_3074073.23-P1P2|THOC6_+_3074256.23-P1P2
DST	ENST00000370754.5	nonessential	DST_-_56819576.23-ENST00000370754.5	GGCGCTACGCGAGTGATCCA	1	1	predicted	DST_-_56819618.23-ENST00000370754.5	GGACTCAGCAGACAGCGACG	2	2	predicted	DST_-_56819576.23-ENST00000370754.5|DST_-_56819618.23-ENST00000370754.5
ME3	P1P2	significant	ME3_+_86383360.23-P1P2	GCTCCCCGAGCAGCGCAGGT	1	1	predicted	ME3_-_86383153.23-P1P2	GTCCAGCCCCCGCCACTCCT	2	2	predicted	ME3_+_86383360.23-P1P2|ME3_-_86383153.23-P1P2
MTNR1A	P1P2	nonessential	MTNR1A_+_187476505.23-P1P2	GCAGGGACCATGCAGGGCAA	1	1	predicted	MTNR1A_+_187476511.23-P1P2	GCGCGCACAGGGACCATGCA	2	2	predicted	MTNR1A_+_187476505.23-P1P2|MTNR1A_+_187476511.23-P1P2
NFKBIZ	P1	nonessential	NFKBIZ_+_101568377.23-P1	GGGCTCAGGGAGCTGTCGGC	1	1	predicted	NFKBIZ_+_101568401.23-P1	GCTGCGCGCGGCTGCCTCCC	2	2	predicted	NFKBIZ_+_101568377.23-P1|NFKBIZ_+_101568401.23-P1
DGUOK	P1P2	significant	DGUOK_+_74154041.23-P1P2	GCTTAGAAAGAGGCGGCCCG	1	5	empirical	DGUOK_+_74154099.23-P1P2	GGGAGGAAACGCCCTCGAGT	2	7	empirical	DGUOK_+_74154041.23-P1P2|DGUOK_+_74154099.23-P1P2
EFCAB14	P1P2	nonessential	EFCAB14_+_47184785.23-P1P2	GCAGGCGGCCGCTGCCAAAG	1	1	predicted	EFCAB14_-_47184724.23-P1P2	GTTGTTGGCGTTggtggcgg	2	2	predicted	EFCAB14_+_47184785.23-P1P2|EFCAB14_-_47184724.23-P1P2
KIF2A	P1P2	significant	KIF2A_+_61602250.23-P1P2	GCCgagggagggggaccgga	1	3	empirical	KIF2A_-_61602704.23-P1P2	GCGGGGACACCAGCCCGGGA	2	4	empirical	KIF2A_+_61602250.23-P1P2|KIF2A_-_61602704.23-P1P2
RTN2	P1	significant	RTN2_-_45996448.23-P1	GCATATCGGCTCCGAGTGAG	1	1	predicted	RTN2_-_45996453.23-P1	GCGGCTCCGAGTGAGAGGCT	2	2	predicted	RTN2_-_45996448.23-P1|RTN2_-_45996453.23-P1
ARPC4	P1P2	significant	ARPC4_-_9834808.23-P1P2	GGCCCAGCCAGCGCCCGCGA	1	1	empirical	ARPC4_-_9834275.23-P1P2	GAGCAAAGCCGCTAGAGGTG	2	4	empirical	ARPC4_-_9834808.23-P1P2|ARPC4_-_9834275.23-P1P2
ARMC6	P1P2	nonessential	ARMC6_+_19144442.23-P1P2	GAGCGTCCGCCCAGAAGAAG	1	1	predicted	ARMC6_-_19144470.23-P1P2	GTTCTGGGCGGACGCTCTGG	2	2	predicted	ARMC6_+_19144442.23-P1P2|ARMC6_-_19144470.23-P1P2
ARHGEF28	P1P2	nonessential	ARHGEF28_-_72922052.23-P1P2	GGAGCCTTCCGGACTCCGGG	1	1	predicted	ARHGEF28_+_72922024.23-P1P2	GGAGTCCGGAAGGCTCTCCC	2	2	predicted	ARHGEF28_-_72922052.23-P1P2|ARHGEF28_+_72922024.23-P1P2
CNOT7	P1P2	nonessential	CNOT7_+_17104350.23-P1P2	GCAGGACGTGCGAAAAGCGA	1	1	predicted	CNOT7_+_17104120.23-P1P2	GGGTTAGGGAAGTAGAAAGG	2	2	predicted	CNOT7_+_17104350.23-P1P2|CNOT7_+_17104120.23-P1P2
FAM129B	P2	nonessential	FAM129B_+_130341271.23-P2	GCAGCTCTCAAGGACGTGCT	1	1	predicted	FAM129B_+_130341257.23-P2	GGTGCTAGGAGTCAGGAACT	2	2	predicted	FAM129B_+_130341271.23-P2|FAM129B_+_130341257.23-P2
GLIPR1L1	P1P2	nonessential	GLIPR1L1_+_75728456.23-P1P2	GTGACTGCGCGGACCAGTAA	1	1	predicted	GLIPR1L1_+_75728818.23-P1P2	GGGAGGAGACAGCCCAACCA	2	2	predicted	GLIPR1L1_+_75728456.23-P1P2|GLIPR1L1_+_75728818.23-P1P2
MYO5B	P1P2	nonessential	MYO5B_+_47721346.23-P1P2	GGCCGCCGCGGCGGGAGTAA	1	1	predicted	MYO5B_-_47721337.23-P1P2	GGCCGCGGCCGGCTCGCTCC	2	2	predicted	MYO5B_+_47721346.23-P1P2|MYO5B_-_47721337.23-P1P2
C15orf52	P2	nonessential	C15orf52_+_40631164.23-P2	GGGCCTGGGGAACCACCGAG	1	1	predicted	C15orf52_-_40631144.23-P2	GAGGCCACATGGGCAGTGCT	2	2	predicted	C15orf52_+_40631164.23-P2|C15orf52_-_40631144.23-P2
OCEL1	P1P2	nonessential	OCEL1_-_17337072.23-P1P2	GAGTAAATGCACAACCCGGA	1	1	predicted	OCEL1_+_17337260.23-P1P2	GTCGCCGCGCAGCCTGGGAC	2	2	predicted	OCEL1_-_17337072.23-P1P2|OCEL1_+_17337260.23-P1P2
TMEM223	P1P2	nonessential	TMEM223_+_62559433.23-P1P2	GTTGGAGGCGATGGCCCACG	1	1	predicted	TMEM223_+_62559472.23-P1P2	GGAAGCCCCACCCCGGAAGT	2	2	predicted	TMEM223_+_62559433.23-P1P2|TMEM223_+_62559472.23-P1P2
GABRR2	P1P2	nonessential	GABRR2_+_90024973.23-P1P2	GCTCAGAGCAGCCCGTCAGG	1	1	predicted	GABRR2_+_90024955.23-P1P2	GGAGGCAGCAGATGGATCAA	2	2	predicted	GABRR2_+_90024973.23-P1P2|GABRR2_+_90024955.23-P1P2
TNNT2	P1P2	nonessential	TNNT2_+_201346744.23-P1P2	GCAGCTGCTGTTCTGAGGTA	2	2	predicted	TNNT2_-_201346779.23-P1P2	GAGCAGCTGCCGACAGATCC	3	3	predicted	TNNT2_+_201346744.23-P1P2|TNNT2_-_201346779.23-P1P2
LOC100133267	NM_001195257	significant	LOC100133267_-_11929071.23-NM_001195257	GGTACCAAAGAAGAGAAACA	1	1	empirical	LOC100133267_+_11928886.23-NM_001195257	GAAGCAAACAGCTATCATCA	2	6	empirical	LOC100133267_-_11929071.23-NM_001195257|LOC100133267_+_11928886.23-NM_001195257
STX1A	P1P2	nonessential	STX1A_+_73133942.23-P1P2	GAGCATGAAGGACCGAACCC	1	1	predicted	STX1A_-_73133980.23-P1P2	GATGCTCCCGGGAGTGGCAG	2	2	predicted	STX1A_+_73133942.23-P1P2|STX1A_-_73133980.23-P1P2
MYO19	P1P2	significant	MYO19_+_34890494.23-P1P2	GGCAGCGGTGAGGAAGAAGT	1	3	empirical	MYO19_+_34891238.23-P1P2	GGCTCGTGCCAGTGTCCCGT	2	8	empirical	MYO19_+_34890494.23-P1P2|MYO19_+_34891238.23-P1P2
PAN2	P1P2	significant	PAN2_+_56727419.23-P1P2	GTCCTGGGTAGCTATTGGAG	1	10	empirical	PAN2_+_56727170.23-P1P2	GGCCTAGCGGAGGAGGGATA	2	6	empirical	PAN2_+_56727419.23-P1P2|PAN2_+_56727170.23-P1P2
GPR152	ENST00000312457.2	nonessential	GPR152_+_67220166.23-ENST00000312457.2	GCTACCATGGAAGCTGACCT	1	1	predicted	GPR152_-_67220184.23-ENST00000312457.2	GGCACCCAGGTCAGCTTCCA	2	2	predicted	GPR152_+_67220166.23-ENST00000312457.2|GPR152_-_67220184.23-ENST00000312457.2
DCAF15	P1P2	nonessential	DCAF15_-_14063546.23-P1P2	Ggagggcgttcgcggggtga	1	1	predicted	DCAF15_-_14063478.23-P1P2	Gtgaggcctggagccggagt	2	2	predicted	DCAF15_-_14063546.23-P1P2|DCAF15_-_14063478.23-P1P2
LIX1L	P1P2	nonessential	LIX1L_-_145477097.23-P1P2	GAGGCGCTAGCTGACTGGGG	1	1	predicted	LIX1L_-_145477093.23-P1P2	GCCCCAGGCGCTAGCTGACT	2	2	predicted	LIX1L_-_145477097.23-P1P2|LIX1L_-_145477093.23-P1P2
SLC25A35	P1P2	nonessential	SLC25A35_+_8198649.23-P1P2	GAAGCTACTGCGAGCTCCGG	1	1	predicted	SLC25A35_+_8198674.23-P1P2	GGGCCTCCGCAGGCTACCCG	2	2	predicted	SLC25A35_+_8198649.23-P1P2|SLC25A35_+_8198674.23-P1P2
ITGB6	P1P2	nonessential	ITGB6_-_161056776.23-P1P2	GAAACAGAGGCTACCTGGAC	1	1	predicted	ITGB6_+_161056568.23-P1P2	GGCAAGAACTGAAACGAATG	2	2	predicted	ITGB6_-_161056776.23-P1P2|ITGB6_+_161056568.23-P1P2
FOXE3	P1P2	nonessential	FOXE3_+_47882018.23-P1P2	GGCAGGGAAGCCAGAGAACG	1	1	predicted	FOXE3_+_47882015.23-P1P2	GGGGAAGCCAGAGAACGCGG	2	2	predicted	FOXE3_+_47882018.23-P1P2|FOXE3_+_47882015.23-P1P2
LRRC70	P1P2	nonessential	LRRC70_+_61874714.23-P1P2	GCACTCAGCTGATTCAGTAA	1	1	predicted	LRRC70_+_61874661.23-P1P2	GTTAACTCCAGTTTGTTCTG	2	2	predicted	LRRC70_+_61874714.23-P1P2|LRRC70_+_61874661.23-P1P2
LYPD4	P1P2	nonessential	LYPD4_-_42348706.23-P1P2	GCGAGGTACAAGGCAAGGGA	1	1	predicted	LYPD4_-_42348696.23-P1P2	GCGCGCGAAGTCGAGGTACA	2	2	predicted	LYPD4_-_42348706.23-P1P2|LYPD4_-_42348696.23-P1P2
MRPS10	P1P2	significant	MRPS10_+_42185532.23-P1P2	GCGGCGCCTCTGGCAGGTAC	1	7	empirical	MRPS10_+_42185527.23-P1P2	GCCTCTGGCAGGTACTGGAT	2	1	empirical	MRPS10_+_42185532.23-P1P2|MRPS10_+_42185527.23-P1P2
ODF3L1	P1P2	nonessential	ODF3L1_+_76016429.23-P1P2	GTCCCCCACCCCAGACACGG	1	1	predicted	ODF3L1_+_76016417.23-P1P2	GGACACGGAGGAAGCTGGGA	2	2	predicted	ODF3L1_+_76016429.23-P1P2|ODF3L1_+_76016417.23-P1P2
ARHGEF33	ENST00000398800.4	nonessential	ARHGEF33_-_39146583.23-ENST00000398800.4	GGCTGGAGAAGAGAAGTAAC	1	1	predicted	ARHGEF33_-_39146566.23-ENST00000398800.4	GGCAATGTTGAAGAATAAGC	2	2	predicted	ARHGEF33_-_39146583.23-ENST00000398800.4|ARHGEF33_-_39146566.23-ENST00000398800.4
FOXH1	P1P2	significant	FOXH1_-_145701160.23-P1P2	GGCGGGACGGTAGACAGCGT	1	1	empirical	FOXH1_-_145701210.23-P1P2	GGGCGGTGGGGCAGTGTAGA	2	5	empirical	FOXH1_-_145701160.23-P1P2|FOXH1_-_145701210.23-P1P2
PLA2G1B	P2	nonessential	PLA2G1B_-_120763872.23-P2	GTCGGTCTGCCAGCACCCCG	1	1	predicted	PLA2G1B_+_120763892.23-P2	GGGAGGCAGCGTGGGACCCG	2	2	predicted	PLA2G1B_-_120763872.23-P2|PLA2G1B_+_120763892.23-P2
PSMB10	P1P2	nonessential	PSMB10_-_67970697.23-P1P2	GGGGTCGCGGGCGGATGAGT	1	1	predicted	PSMB10_-_67970711.23-P1P2	GTGAGTCGGCCAGACAAGCG	2	2	predicted	PSMB10_-_67970697.23-P1P2|PSMB10_-_67970711.23-P1P2
SPP2	P1P2	nonessential	SPP2_-_234959373.23-P1P2	GGATAAAGACAGCTCCTCTT	1	1	predicted	SPP2_+_234959571.23-P1P2	GGCACAGTGAGACAAGACAC	2	2	predicted	SPP2_-_234959373.23-P1P2|SPP2_+_234959571.23-P1P2
PRSS51	P1P2	nonessential	PRSS51_-_10405071.23-P1P2	GGCTGCCTCGCCACATCCCT	1	1	predicted	PRSS51_+_10405096.23-P1P2	GTAGTGCCTGCTAACGGGGT	2	2	predicted	PRSS51_-_10405071.23-P1P2|PRSS51_+_10405096.23-P1P2
NLGN4X	P2	nonessential	NLGN4X_+_6145057.23-P2	GCGGCGGAGGAGACAGTGCG	1	1	predicted	NLGN4X_+_6145073.23-P2	GCCAAGCGCGCAGCCGGCGG	2	2	predicted	NLGN4X_+_6145057.23-P2|NLGN4X_+_6145073.23-P2
FAM173A	P1P2	nonessential	FAM173A_-_771248.23-P1P2	GCCGAGCCGGGAAGGACCTT	1	1	predicted	FAM173A_+_771374.23-P1P2	GAGCAGCGCCCACACCGCGT	2	2	predicted	FAM173A_-_771248.23-P1P2|FAM173A_+_771374.23-P1P2
OR51G1	ENST00000321961.2	nonessential	OR51G1_-_4945405.23-ENST00000321961.2	GTACATGGGTCCATGGAGAG	1	1	predicted	OR51G1_-_4945534.23-ENST00000321961.2	GAAGCCCGTCAGGAAGAAAG	2	2	predicted	OR51G1_-_4945405.23-ENST00000321961.2|OR51G1_-_4945534.23-ENST00000321961.2
TMEM167A	P1P2	significant	TMEM167A_+_82373138.23-P1P2	GGGCATCGCCGGCCTCGCTA	1	2	empirical	TMEM167A_-_82372794.23-P1P2	GAAGCCCCTAGGGCGAGATA	2	6	empirical	TMEM167A_+_82373138.23-P1P2|TMEM167A_-_82372794.23-P1P2
C15orf38-AP3S2	P2	nonessential	C15orf38-AP3S2_-_90456102.23-P2	GGGGCACCCCGGCACAGAGC	1	1	predicted	C15orf38-AP3S2_-_90456061.23-P2	GCGCGCCGTCGTGGTAGATG	2	2	predicted	C15orf38-AP3S2_-_90456102.23-P2|C15orf38-AP3S2_-_90456061.23-P2
NR2F2	P1P2	significant	NR2F2_-_96874379.23-P1P2	Gagcggctccgggcccgacc	1	6	empirical	NR2F2_+_96874160.23-P1P2	GATCCTTCGTGCGCAGAGGG	2	8	empirical	NR2F2_-_96874379.23-P1P2|NR2F2_+_96874160.23-P1P2
ARPC5	P1P2	significant	ARPC5_+_183604818.23-P1P2	GTAGAGGCAGCGCCAAGAAG	1	2	empirical	ARPC5_-_183604444.23-P1P2	GAGGGCAGGCTTCCAAGAGT	2	4	empirical	ARPC5_+_183604818.23-P1P2|ARPC5_-_183604444.23-P1P2
POP5	P1P2	essential	POP5_+_121019173.23-P1P2	GCACGCCGGACCGGAGAGCG	1	2	essential	POP5_-_121019190.23-P1P2	GGCCTCCGCGCTCTCCGGTC	2	3	essential	POP5_+_121019173.23-P1P2|POP5_-_121019190.23-P1P2
WNT11	P1	nonessential	WNT11_-_75921718.23-P1	GACCCGCGCGGAGTCAGGCG	1	1	predicted	WNT11_+_75921403.23-P1	GCACCCGCCACGACCCCCTT	2	2	predicted	WNT11_-_75921718.23-P1|WNT11_+_75921403.23-P1
TMTC3	P1P2	nonessential	TMTC3_-_88536106.23-P1P2	GGACTGCGACGGTACCGGGG	1	1	predicted	TMTC3_-_88536103.23-P1P2	GTAAGACTGCGACGGTACCG	2	2	predicted	TMTC3_-_88536106.23-P1P2|TMTC3_-_88536103.23-P1P2
UBR4	P1P2	significant	UBR4_-_19536410.23-P1P2	GCGTTGGCGGAGGGAAACCC	1	10	empirical	UBR4_-_19536774.23-P1P2	GCTACTGCGGCTCCCTCCGG	2	4	empirical	UBR4_-_19536410.23-P1P2|UBR4_-_19536774.23-P1P2
CXCL16	P1P2	significant	CXCL16_-_4643154.23-P1P2	GGCTGCATGAGCCTCCCGGG	1	1	predicted	CXCL16_-_4643151.23-P1P2	GCGCGCTGCATGAGCCTCCC	2	2	predicted	CXCL16_-_4643154.23-P1P2|CXCL16_-_4643151.23-P1P2
DPAGT1	P1P2	significant	DPAGT1_-_118972536.23-P1P2	GAGCCGCCGTCGGGACACCG	1	3	empirical	DPAGT1_+_118972531.23-P1P2	GTTGCCTTAGAGAGGTTCCC	2	7	empirical	DPAGT1_-_118972536.23-P1P2|DPAGT1_+_118972531.23-P1P2
CORO1B	P1	nonessential	CORO1B_-_67210879.23-P1	GgccctgccGCGCTCACCGG	1	1	predicted	CORO1B_-_67210919.23-P1	GCTGCGGCACCGGCTTCGGG	2	2	predicted	CORO1B_-_67210879.23-P1|CORO1B_-_67210919.23-P1
CRB3	P1P2	nonessential	CRB3_-_6464312.23-P1P2	GCGACGGACCGAGGGTTCGA	1	1	predicted	CRB3_-_6464316.23-P1P2	GGGACCGAGGGTTCGAGGGA	2	2	predicted	CRB3_-_6464312.23-P1P2|CRB3_-_6464316.23-P1P2
MARVELD3	P1P2	nonessential	MARVELD3_-_71660150.23-P1P2	GGCCATGGAAGATCCGTCGG	1	1	predicted	MARVELD3_-_71660321.23-P1P2	GCGGGACCCGGAGAGAGACC	2	2	predicted	MARVELD3_-_71660150.23-P1P2|MARVELD3_-_71660321.23-P1P2
FBXW10	ENST00000395665.4,ENST00000395667.1	nonessential	FBXW10_-_18647538.23-ENST00000395665.4,ENST00000395667.1	GCAAGTGCGCAGGGCTAAAA	1	1	predicted	FBXW10_-_18647543.23-ENST00000395665.4,ENST00000395667.1	GGCGCAGGGCTAAAATGGAC	2	2	predicted	FBXW10_-_18647538.23-ENST00000395665.4,ENST00000395667.1|FBXW10_-_18647543.23-ENST00000395665.4,ENST00000395667.1
SRSF11	P2	significant	SRSF11_+_70687220.23-P2	GCGGATTGCGGGAGAGAGGA	1	1	empirical	SRSF11_-_70687171.23-P2	Gcggcggggcggagaaacgg	2	2	empirical	SRSF11_+_70687220.23-P2|SRSF11_-_70687171.23-P2
MAN1A2	P1P2	nonessential	MAN1A2_-_117910093.23-P1P2	GACCCGTGCGGTAGCAACAG	1	1	predicted	MAN1A2_+_117910154.23-P1P2	GCCCGCTGCTGCCCACTCGA	2	2	predicted	MAN1A2_-_117910093.23-P1P2|MAN1A2_+_117910154.23-P1P2
C1QB	P1P2	nonessential	C1QB_-_22979740.23-P1P2	GACCGAGGGCAGTAGGCTCT	1	1	predicted	C1QB_-_22979807.23-P1P2	GAGCTTCCCAGGTGAGGACG	2	2	predicted	C1QB_-_22979740.23-P1P2|C1QB_-_22979807.23-P1P2
SLC25A32	P1P2	significant	SLC25A32_-_104427338.23-P1P2	GGCCGGAGACTCTAGTACTG	1	4	empirical	SLC25A32_-_104427352.23-P1P2	GTACTGAGGGGGCAAGAACG	2	2	empirical	SLC25A32_-_104427338.23-P1P2|SLC25A32_-_104427352.23-P1P2
MYH6	P1	nonessential	MYH6_+_23877450.23-P1	GCTGCGGCCCAGGTAAGAGG	1	1	predicted	MYH6_-_23877414.23-P1	GAGGAGGTCCCTCACGGTGG	2	2	predicted	MYH6_+_23877450.23-P1|MYH6_-_23877414.23-P1
WDR74	P1	significant	WDR74_+_62607006.23-P1	GTGCACGCTGGAACCATGTG	1	1	empirical	WDR74_+_62607035.23-P1	GCCTCCAGGCTTTGTCATGG	2	4	empirical	WDR74_+_62607006.23-P1|WDR74_+_62607035.23-P1
RSPO2	P1P2	nonessential	RSPO2_-_109095793.23-P1P2	GAAGGCAGAACGCTCTCGGG	1	1	predicted	RSPO2_-_109095790.23-P1P2	GTAGAAGGCAGAACGCTCTC	2	2	predicted	RSPO2_-_109095793.23-P1P2|RSPO2_-_109095790.23-P1P2
ZNF784	P1P2	nonessential	ZNF784_+_56135894.23-P1P2	GGCGCCCAGAGGCCCAGAGT	1	1	predicted	ZNF784_-_56135887.23-P1P2	GGGGATCGCGACTCCGGAGT	2	2	predicted	ZNF784_+_56135894.23-P1P2|ZNF784_-_56135887.23-P1P2
PDIA2	P1P2	nonessential	PDIA2_-_330659.23-P1P2	Gcggctcctcggcggctccg	1	1	predicted	PDIA2_-_330602.23-P1P2	GGCTCACCGCAGTCGCGCCG	2	2	predicted	PDIA2_-_330659.23-P1P2|PDIA2_-_330602.23-P1P2
SRGAP1	P1P2	nonessential	SRGAP1_-_64237915.23-P1P2	GGGAGACCTAAACTCCGCCG	1	1	predicted	SRGAP1_+_64237921.23-P1P2	GCGACGCTCAGACGCGCCCT	2	2	predicted	SRGAP1_-_64237915.23-P1P2|SRGAP1_+_64237921.23-P1P2
SEMA4F	P1P2	nonessential	SEMA4F_-_74881428.23-P1P2	GAGCCGAGAGGACCCGAGTG	1	1	predicted	SEMA4F_+_74881442.23-P1P2	GGCCTCTGCTCAGGGCCCCG	2	2	predicted	SEMA4F_-_74881428.23-P1P2|SEMA4F_+_74881442.23-P1P2
NPC1L1	P1P2	nonessential	NPC1L1_+_44580791.23-P1P2	GCTGCGCTTGGTGAGTCCCA	1	1	predicted	NPC1L1_+_44580637.23-P1P2	GTGCCAGGCCCCACAGAGGA	2	2	predicted	NPC1L1_+_44580791.23-P1P2|NPC1L1_+_44580637.23-P1P2
RBM11	P1P2	nonessential	RBM11_-_15588506.23-P1P2	GATTCTACGGCCGAGACCGG	1	1	predicted	RBM11_+_15588477.23-P1P2	GCTCGGCCGTAGAATGAAGT	2	2	predicted	RBM11_-_15588506.23-P1P2|RBM11_+_15588477.23-P1P2
GPR156	P1P2	nonessential	GPR156_+_120004064.23-P1P2	GCGCCCCGCGCACACCTCAG	1	1	predicted	GPR156_-_120004072.23-P1P2	GACGGCGGCGCAGGCCTCTG	2	2	predicted	GPR156_+_120004064.23-P1P2|GPR156_-_120004072.23-P1P2
P4HTM	P1P2	nonessential	P4HTM_-_49027734.23-P1P2	GCAGCGGCCTGAGACCGCGG	1	1	predicted	P4HTM_-_49027718.23-P1P2	GAGCGGCGGTGACAGGCCAG	2	2	predicted	P4HTM_-_49027734.23-P1P2|P4HTM_-_49027718.23-P1P2
KCNA7	P1P2	nonessential	KCNA7_+_49575870.23-P1P2	GGGGCGTCGGGGCCACACGT	1	1	predicted	KCNA7_-_49575880.23-P1P2	GCGACCCGCGAACCGACGTG	2	2	predicted	KCNA7_+_49575870.23-P1P2|KCNA7_-_49575880.23-P1P2
PSAPL1	P1P2	nonessential	PSAPL1_-_7436646.23-P1P2	GGCTCCAGAGTACCCAGCAG	1	1	predicted	PSAPL1_-_7436581.23-P1P2	GTGGTGGCCCCCAGGAGGCT	2	2	predicted	PSAPL1_-_7436646.23-P1P2|PSAPL1_-_7436581.23-P1P2
GPR32	P1P2	nonessential	GPR32_+_51273982.23-P1P2	GGATAACCACAGTCAGTGGG	1	1	predicted	GPR32_+_51273985.23-P1P2	GCAGGATAACCACAGTCAGT	2	2	predicted	GPR32_+_51273982.23-P1P2|GPR32_+_51273985.23-P1P2
OR7D2	ENST00000344248.2	nonessential	OR7D2_+_9296529.23-ENST00000344248.2	GGGAACAGCCCAAATATGAA	1	1	predicted	OR7D2_+_9296495.23-ENST00000344248.2	GATCCTCAGAGAGTCCGAGA	2	2	predicted	OR7D2_+_9296529.23-ENST00000344248.2|OR7D2_+_9296495.23-ENST00000344248.2
ZMYND15	P1P2	nonessential	ZMYND15_-_4643154.23-P1P2	GGCTGCATGAGCCTCCCGGG	1	1	predicted	ZMYND15_-_4643151.23-P1P2	GCGCGCTGCATGAGCCTCCC	2	2	predicted	ZMYND15_-_4643154.23-P1P2|ZMYND15_-_4643151.23-P1P2
WBSCR28	P1P2	nonessential	WBSCR28_-_73275514.23-P1P2	GTCCCAGCTGGAGTAGGTGG	1	1	predicted	WBSCR28_+_73275553.23-P1P2	GCTGCAACAGGATCCCCAAA	2	2	predicted	WBSCR28_-_73275514.23-P1P2|WBSCR28_+_73275553.23-P1P2
LIN7B	P1P2	nonessential	LIN7B_+_49617722.23-P1P2	GTGTAGGCCGCGGCCCGGGT	1	1	predicted	LIN7B_-_49617664.23-P1P2	GGGCAGCTGTGGCGCCGACA	2	2	predicted	LIN7B_+_49617722.23-P1P2|LIN7B_-_49617664.23-P1P2
WAPAL	P1P2	significant	WAPAL_+_88281533.23-P1P2	GAGCGGAGTGACGGAGCGAG	1	2	empirical	WAPAL_+_88281542.23-P1P2	GACTGTGGGAAGCGGAGTGA	2	1	empirical	WAPAL_+_88281533.23-P1P2|WAPAL_+_88281542.23-P1P2
BEND5	P1P2	nonessential	BEND5_+_49242360.23-P1P2	GACCGGGGCCCGGAGGAATT	1	1	predicted	BEND5_-_49242454.23-P1P2	GAGTCGCGCACGCACGACAC	2	2	predicted	BEND5_+_49242360.23-P1P2|BEND5_-_49242454.23-P1P2
ZNF621	P1P2	nonessential	ZNF621_+_40566462.23-P1P2	GGGAGCTGGTCACTAACTAA	1	1	predicted	ZNF621_+_40566448.23-P1P2	GACTAAAGGCCGAGCCGGAA	2	2	predicted	ZNF621_+_40566462.23-P1P2|ZNF621_+_40566448.23-P1P2
NDUFS5	P1	significant	NDUFS5_-_39492036.23-P1	GCTAGCTAGTCGTTCTGAAG	1	1	empirical	NDUFS5_-_39492056.23-P1	GGGCGGCCAGAGAAGAGTCA	2	4	empirical	NDUFS5_-_39492036.23-P1|NDUFS5_-_39492056.23-P1
RDH13	P2	nonessential	RDH13_+_55580854.23-P2	GGACCGTAGCAGCCTAGAGG	1	1	predicted	RDH13_-_55580828.23-P2	GACTCTAGACACTCAGGGAT	2	2	predicted	RDH13_+_55580854.23-P2|RDH13_-_55580828.23-P2
RAB39B	P1P2	nonessential	RAB39B_-_154493714.23-P1P2	GTGGGAGCCCGAAGCTGGGT	1	1	predicted	RAB39B_-_154493720.23-P1P2	GCCCGAAGCTGGGTAGGCCC	2	2	predicted	RAB39B_-_154493714.23-P1P2|RAB39B_-_154493720.23-P1P2
ID4	P1P2	nonessential	ID4_-_19837657.23-P1P2	GCCGGGAGTGGGGTGATCCC	1	1	predicted	ID4_-_19837640.23-P1P2	GCGCGGTTGTGAGTAGTACC	2	2	predicted	ID4_-_19837657.23-P1P2|ID4_-_19837640.23-P1P2
TPST2	P1	nonessential	TPST2_+_26986048.23-P1	GTGGAGAGCCGGGAGTCGCT	2	2	predicted	TPST2_+_26986040.23-P1	GCGGGAGTCGCTGGGTGCGT	3	3	predicted	TPST2_+_26986048.23-P1|TPST2_+_26986040.23-P1
TMEM108	P1P2	nonessential	TMEM108_+_132757247.23-P1P2	GGCGCTCCGGCTCCCTCCGA	1	1	predicted	TMEM108_+_132757260.23-P1P2	GTACCTCGGGAGAAGCGCTC	2	2	predicted	TMEM108_+_132757247.23-P1P2|TMEM108_+_132757260.23-P1P2
RANBP17	P1P2	nonessential	RANBP17_-_170289270.23-P1P2	GCCGGAGCCCGAGAAAGGGG	1	1	predicted	RANBP17_-_170288928.23-P1P2	GTGAGGCTGCGAAGGACGAG	2	2	predicted	RANBP17_-_170289270.23-P1P2|RANBP17_-_170288928.23-P1P2
TM7SF3	P1P2	nonessential	TM7SF3_+_27167286.23-P1P2	GAAGAGGAAACCTCTCGCTG	1	1	predicted	TM7SF3_+_27167271.23-P1P2	GGCTGGGGCTAGGAGTTcgg	2	2	predicted	TM7SF3_+_27167286.23-P1P2|TM7SF3_+_27167271.23-P1P2
NFIC	P2	significant	NFIC_-_3359650.23-P2	GGGACCGAGCGCGCTCGCTC	1	1	predicted	NFIC_+_3359696.23-P2	GCCCGGGCGAAAACGAAAGT	2	2	predicted	NFIC_-_3359650.23-P2|NFIC_+_3359696.23-P2
C1orf192	P1P2	nonessential	C1orf192_-_161337638.23-P1P2	GGAATGGGAACTTACCTGGT	1	1	predicted	C1orf192_-_161337634.23-P1P2	GTGGAGAATGGGAACTTACC	2	2	predicted	C1orf192_-_161337638.23-P1P2|C1orf192_-_161337634.23-P1P2
TMEM99	P1P2	nonessential	TMEM99_-_38975422.23-P1P2	GccgcctccgGAACTAAACG	1	1	predicted	TMEM99_-_38975464.23-P1P2	GTCTAACGTTGGAAAACGGT	2	2	predicted	TMEM99_-_38975422.23-P1P2|TMEM99_-_38975464.23-P1P2
ACSL1	P1P2	nonessential	ACSL1_+_185747071.23-P1P2	GCGGAGCGGCCGGTCCACGG	1	1	predicted	ACSL1_+_185747074.23-P1P2	GCGGCGGAGCGGCCGGTCCA	2	2	predicted	ACSL1_+_185747071.23-P1P2|ACSL1_+_185747074.23-P1P2
MBD3L3	ENST00000333843.4	nonessential	MBD3L3_+_7058442.23-ENST00000333843.4	GTGGAAAGTTATACCTCAGG	1	1	predicted	MBD3L3_-_7058583.23-ENST00000333843.4	GCGTACTCACCAGAACAGGT	2	2	predicted	MBD3L3_+_7058442.23-ENST00000333843.4|MBD3L3_-_7058583.23-ENST00000333843.4
DPH6	P1P2	significant	DPH6_-_35838270.23-P1P2	GGCGCTAGCGGCGGCTGGAA	1	1	empirical	DPH6_+_35838318.23-P1P2	GGAGGGTCGCGGCTCTGATC	2	8	empirical	DPH6_-_35838270.23-P1P2|DPH6_+_35838318.23-P1P2
LRRC37B	P1P2	nonessential	LRRC37B_-_30334632.23-P1P2	GGCCTGGGCTCCAACAAGAG	1	1	predicted	LRRC37B_+_30334606.23-P1P2	GCTTGTTGGAGCCCAGGCGG	2	2	predicted	LRRC37B_-_30334632.23-P1P2|LRRC37B_+_30334606.23-P1P2
RPS9	P1P2	significant	RPS9_-_54704761.23-P1P2	GCGGGTGGTTTGCTTAGGTG	1	1	empirical	RPS9_+_54704997.23-P1P2	GGAGAGAAGTGTGAGCGTAA	2	2	empirical	RPS9_-_54704761.23-P1P2|RPS9_+_54704997.23-P1P2
PPP2R5B	P2	nonessential	PPP2R5B_-_64685063.23-P2	GTCGTAGAAGCCTTCCCCAG	1	1	predicted	PPP2R5B_+_64685051.23-P2	GGAGTTTACTCCTCTGGGGA	2	2	predicted	PPP2R5B_-_64685063.23-P2|PPP2R5B_+_64685051.23-P2
GLTP	P1P2	nonessential	GLTP_-_110318088.23-P1P2	GCCGGCTCACCGAAGAAGGG	1	1	predicted	GLTP_+_110318264.23-P1P2	Gctgcggcgggcggctgtga	2	2	predicted	GLTP_-_110318088.23-P1P2|GLTP_+_110318264.23-P1P2
GATA2	P1	significant	GATA2_-_128211996.23-P1	GACTTGAGCAGCGAGTCCCG	1	1	predicted	GATA2_-_128211957.23-P1	GGGCCCTGCTAGGATGGATG	2	2	predicted	GATA2_-_128211996.23-P1|GATA2_-_128211957.23-P1
ZNF286A	P1P2	nonessential	ZNF286A_-_15602923.23-P1P2	GGATTCTCCCAGCCGCACCA	1	1	predicted	ZNF286A_-_15603001.23-P1P2	GGTAGTTCCGGGCGGGATGA	2	2	predicted	ZNF286A_-_15602923.23-P1P2|ZNF286A_-_15603001.23-P1P2
LRRC53	P1P2	nonessential	LRRC53_-_74978257.23-P1P2	GGAATCTCTACATTAAAAGG	1	1	predicted	LRRC53_-_74977869.23-P1P2	GCCTGTGAGGGACCATAAAG	2	2	predicted	LRRC53_-_74978257.23-P1P2|LRRC53_-_74977869.23-P1P2
OR10J1	ENST00000423932.3	nonessential	OR10J1_-_159409533.23-ENST00000423932.3	GGTGCTTCTACTGCTTTACT	1	1	predicted	OR10J1_+_159409814.23-ENST00000423932.3	GGAGGCTGGAGAGCATTCTT	2	2	predicted	OR10J1_-_159409533.23-ENST00000423932.3|OR10J1_+_159409814.23-ENST00000423932.3
NRDE2	P1P2	essential	NRDE2_+_90798265.23-P1P2	GCCATCCCTATAGAGAAGAA	1	4	essential	NRDE2_-_90798256.23-P1P2	GGGAACAGCGCCATGACCAC	2	1	essential	NRDE2_+_90798265.23-P1P2|NRDE2_-_90798256.23-P1P2
UCMA	P1P2	nonessential	UCMA_+_13276315.23-P1P2	GCTCAGAAGTGGGGACCCAA	1	1	predicted	UCMA_-_13276365.23-P1P2	GGCCCAGGCGAGAGGAAGGA	2	2	predicted	UCMA_+_13276315.23-P1P2|UCMA_-_13276365.23-P1P2
TCP11L1	P1P2	nonessential	TCP11L1_+_33061162.23-P1P2	GCTCCCAGCCCGACTCGGGT	1	1	predicted	TCP11L1_+_33061083.23-P1P2	GGAGGCGCCAGCCCAATATA	2	2	predicted	TCP11L1_+_33061162.23-P1P2|TCP11L1_+_33061083.23-P1P2
CD48	P1P2	nonessential	CD48_+_160681557.23-P1P2	GGTTGCTGGGAAGTTCTGGA	1	1	predicted	CD48_+_160681561.23-P1P2	GCTGCGTTGCTGGGAAGTTC	2	2	predicted	CD48_+_160681557.23-P1P2|CD48_+_160681561.23-P1P2
HLA-B	P1P2	nonessential	HLA-B_+_31324922.23-P1P2	GGACGCCGAGATGCTGGTCA	1	1	predicted	HLA-B_+_31324842.23-P1P2	GCGGTGAGTGCGGGTCGGGA	2	2	predicted	HLA-B_+_31324922.23-P1P2|HLA-B_+_31324842.23-P1P2
OVCH2	P1P2	nonessential	OVCH2_+_7727673.23-P1P2	GGCAATCGGCATAGGACACA	1	1	predicted	OVCH2_-_7727786.23-P1P2	GCCAAAGGAACATGGAGTCT	2	2	predicted	OVCH2_+_7727673.23-P1P2|OVCH2_-_7727786.23-P1P2
TTC30A	P1P2	nonessential	TTC30A_-_178483479.23-P1P2	GCCACGGCAACAGGGCAACC	1	1	predicted	TTC30A_-_178483463.23-P1P2	GGTTATGCGTGCGGTTACCA	2	2	predicted	TTC30A_-_178483479.23-P1P2|TTC30A_-_178483463.23-P1P2
ZNF563	P1P2	nonessential	ZNF563_-_12444427.23-P1P2	GAGGCTACACAGACGTTCCA	1	1	predicted	ZNF563_-_12444369.23-P1P2	GGCGGGTCCCACTGTGACAG	3	3	predicted	ZNF563_-_12444427.23-P1P2|ZNF563_-_12444369.23-P1P2
HERC4	P1P2	nonessential	HERC4_-_69835000.23-P1P2	Ggaagaacgggaggcaagcg	1	1	predicted	HERC4_-_69834991.23-P1P2	Ggcgggcggggaagaacggg	2	2	predicted	HERC4_-_69835000.23-P1P2|HERC4_-_69834991.23-P1P2
LMNB1	P1P2	nonessential	LMNB1_+_126112906.23-P1P2	GGCGGGAAAATGCAAGACGA	1	1	predicted	LMNB1_+_126113141.23-P1P2	GGCGGGACCGTGATAAGGAG	2	2	predicted	LMNB1_+_126112906.23-P1P2|LMNB1_+_126113141.23-P1P2
APAF1	P1P2	significant	APAF1_-_99039085.23-P1P2	GTCCAGAGGCGGAGAAGAAG	1	1	empirical	APAF1_-_99039071.23-P1P2	GTGACTGCTCCGCTGTCCAG	2	4	empirical	APAF1_-_99039085.23-P1P2|APAF1_-_99039071.23-P1P2
CBWD1	ENST00000356521.4	nonessential	CBWD1_+_178688.23-ENST00000356521.4	GGCAAATGTCTTCGAGGTCG	1	1	predicted	CBWD1_+_178684.23-ENST00000356521.4	GATGTCTTCGAGGTCGGGGC	2	2	predicted	CBWD1_+_178688.23-ENST00000356521.4|CBWD1_+_178684.23-ENST00000356521.4
KIAA0895	P2	significant	KIAA0895_-_36429483.23-P2	GCAGAGGCCGAGTCCGTCAC	1	3	empirical	KIAA0895_-_36429499.23-P2	GCACTGGAAGCCGAGAGGAG	2	2	empirical	KIAA0895_-_36429483.23-P2|KIAA0895_-_36429499.23-P2
ACER1	P1P2	nonessential	ACER1_-_6333545.23-P1P2	GTCCACCTCGGAGCTCTGAT	1	1	predicted	ACER1_-_6333558.23-P1P2	GTCTGATAGGCGAAGATGCT	2	2	predicted	ACER1_-_6333545.23-P1P2|ACER1_-_6333558.23-P1P2
METTL13	P1P2	nonessential	METTL13_-_171750850.23-P1P2	GAGTTCGGGAAAAGTGTGAG	1	1	predicted	METTL13_+_171750421.23-P1P2	GCCGATCGTGCGCCGCACAA	2	2	predicted	METTL13_-_171750850.23-P1P2|METTL13_+_171750421.23-P1P2
TBX22	P1P2	nonessential	TBX22_+_79270455.23-P1P2	GTAGTTAACAGGAGAGGAAG	1	1	predicted	TBX22_+_79270461.23-P1P2	GTAGTGATAGTTAACAGGAG	2	2	predicted	TBX22_+_79270455.23-P1P2|TBX22_+_79270461.23-P1P2
SOX3	P1P2	significant	SOX3_+_139586836.23-P1P2	GGCAGCGGTGGTGCGAGCGG	1	10	empirical	SOX3_-_139587186.23-P1P2	GCAAATCAGCAGGAACCCGC	1	1	predicted	SOX3_+_139586836.23-P1P2|SOX3_-_139587186.23-P1P2
TSGA13	P1P2	nonessential	TSGA13_-_130371331.23-P1P2	GGTGAAGAAGGCAAAGTCTT	1	1	predicted	TSGA13_-_130370970.23-P1P2	GGTGGAAAGCCCATAGACAA	2	2	predicted	TSGA13_-_130371331.23-P1P2|TSGA13_-_130370970.23-P1P2
MS4A2	P1P2	nonessential	MS4A2_+_59856151.23-P1P2	GCTTACTGCATGCTCTGAAT	1	1	predicted	MS4A2_+_59856276.23-P1P2	GCTACCTGGAAGGCTCCTGT	2	2	predicted	MS4A2_+_59856151.23-P1P2|MS4A2_+_59856276.23-P1P2
PPP3CB	P1P2	nonessential	PPP3CB_-_75255743.23-P1P2	GGCGGCGCCGCCGGGGAACA	1	1	predicted	PPP3CB_+_75255728.23-P1P2	GGGTCCGCCATGTTCCCCGG	2	2	predicted	PPP3CB_-_75255743.23-P1P2|PPP3CB_+_75255728.23-P1P2
KATNB1	P1P2	nonessential	KATNB1_-_57769705.23-P1P2	GCAGCGGCCAATCAAGGCAG	1	1	predicted	KATNB1_-_57769699.23-P1P2	GGTCAAGCAGCGGCCAATCA	2	2	predicted	KATNB1_-_57769705.23-P1P2|KATNB1_-_57769699.23-P1P2
TMEM119	P1P2	nonessential	TMEM119_-_108991797.23-P1P2	GCGCCGAATGGAGCGAGAGT	1	1	predicted	TMEM119_-_108991831.23-P1P2	GTGGAAGAGAGAGTCCGTGC	2	2	predicted	TMEM119_-_108991797.23-P1P2|TMEM119_-_108991831.23-P1P2
UGCG	P1P2	significant	UGCG_+_114659059.23-P1P2	GCGGCTCGCGCCCCACTCCT	1	7	empirical	UGCG_+_114659529.23-P1P2	GAAGAGGACGAACCCGAAGA	2	3	empirical	UGCG_+_114659059.23-P1P2|UGCG_+_114659529.23-P1P2
AOX1	P2	nonessential	AOX1_+_201474091.23-P2	GAGTTACCCACAGCCAGGAT	1	1	predicted	AOX1_+_201474232.23-P2	GGAAATGTATTGATATTATA	2	2	predicted	AOX1_+_201474091.23-P2|AOX1_+_201474232.23-P2
DDR1	P1	nonessential	DDR1_-_30852454.23-P1	GAGAGGCCCCGCTCCCGGGT	1	1	predicted	DDR1_+_30852305.23-P1	GAGCTGTCGGGGGCCTGTTC	2	2	predicted	DDR1_-_30852454.23-P1|DDR1_+_30852305.23-P1
RLIM	P1P2	nonessential	RLIM_-_73834186.23-P1P2	GGGGCCATTTTGAGAGAACG	1	1	predicted	RLIM_+_73834239.23-P1P2	GACCTAGTAAGTGAAGACTT	2	2	predicted	RLIM_-_73834186.23-P1P2|RLIM_+_73834239.23-P1P2
ZBED6	P1P2	significant	ZBED6_+_203765262.23-P1P2	GGGGGAACAGTCGGTTTTCG	1	10	empirical	ZBED6_-_203765641.23-P1P2	GATCGGTGCGGATTCCTATG	2	7	empirical	ZBED6_+_203765262.23-P1P2|ZBED6_-_203765641.23-P1P2
PLAG1	P1P2	nonessential	PLAG1_+_57123816.23-P1P2	GGGCAGCGCATACACTACAA	1	1	predicted	PLAG1_+_57123836.23-P1P2	GgcTGCAAGTTGGGCTGCAG	2	2	predicted	PLAG1_+_57123816.23-P1P2|PLAG1_+_57123836.23-P1P2
OR6C75	ENST00000343399.3	nonessential	OR6C75_+_55758988.23-ENST00000343399.3	GCCAGTCACACTTAACATGT	1	1	predicted	OR6C75_+_55759312.23-ENST00000343399.3	GCAGGAGCTAAAGACAAGAA	2	2	predicted	OR6C75_+_55758988.23-ENST00000343399.3|OR6C75_+_55759312.23-ENST00000343399.3
ALPL	P2	nonessential	ALPL_+_21877779.23-P2	Ggccatctcagctgccacac	1	1	predicted	ALPL_-_21877787.23-P2	Gcacttagaaactcccggtg	2	2	predicted	ALPL_+_21877779.23-P2|ALPL_-_21877787.23-P2
LRP3	P1P2	nonessential	LRP3_+_33685241.23-P1P2	GccgccGGTAGAGCGTCCGT	1	1	predicted	LRP3_-_33685259.23-P1P2	GAGACCCACGGACGCTCTAC	2	2	predicted	LRP3_+_33685241.23-P1P2|LRP3_-_33685259.23-P1P2
NUP214	P1P2	significant	NUP214_-_134001051.23-P1P2	GGTTCCGTGGGCAAGGCCGT	1	2	empirical	NUP214_-_134001039.23-P1P2	GCGAGCGGCCTGGGTTCCGT	2	1	empirical	NUP214_-_134001051.23-P1P2|NUP214_-_134001039.23-P1P2
RNF152	P1	nonessential	RNF152_-_59560219.23-P1	GGAAATCCAAGCGCCCTCCT	1	1	predicted	RNF152_-_59560248.23-P1	GGGCTGGAGCGGGTGCACTA	2	2	predicted	RNF152_-_59560219.23-P1|RNF152_-_59560248.23-P1
ZNF518B	P1P2	nonessential	ZNF518B_+_10458705.23-P1P2	GCGTGGGGCACCGGCTGGGG	1	1	predicted	ZNF518B_+_10459017.23-P1P2	GCCCGGGTAGGGACCTACAG	2	2	predicted	ZNF518B_+_10458705.23-P1P2|ZNF518B_+_10459017.23-P1P2
MICA	P1P2	nonessential	MICA_+_31371381.23-P1P2	GGACGTCGCCACCCTCTCAG	1	1	predicted	MICA_-_31371395.23-P1P2	GGCTTGAGCCGCTGAGAGGG	2	2	predicted	MICA_+_31371381.23-P1P2|MICA_-_31371395.23-P1P2
HIST2H3D	ENST00000331491.1	nonessential	HIST2H3D_-_149784861.23-ENST00000331491.1	GGCGGATGCGGCGGGCCAAC	1	1	predicted	HIST2H3D_-_149785258.23-ENST00000331491.1	GCTGTCTCATTGATAGGAGA	2	2	predicted	HIST2H3D_-_149784861.23-ENST00000331491.1|HIST2H3D_-_149785258.23-ENST00000331491.1
TRIM44	P1P2	nonessential	TRIM44_-_35684441.23-P1P2	GGCGCGGCAGAGGAAGCGCA	1	1	predicted	TRIM44_-_35684474.23-P1P2	GCAGGCCGAGCCGGCGGAAA	2	2	predicted	TRIM44_-_35684441.23-P1P2|TRIM44_-_35684474.23-P1P2
C14orf39	P1P2	nonessential	C14orf39_-_60952739.23-P1P2	GTCCACTCAGGACGCCACAG	1	1	predicted	C14orf39_+_60952719.23-P1P2	GTCCGCTGTGGCGTCCTGAG	2	2	predicted	C14orf39_-_60952739.23-P1P2|C14orf39_+_60952719.23-P1P2
C19orf43	P1P2	significant	C19orf43_+_12845386.23-P1P2	Gggcggtggcgggagccgtt	1	1	empirical	C19orf43_-_12845065.23-P1P2	GGGTCCCGATCCCCCTTCAC	2	8	empirical	C19orf43_+_12845386.23-P1P2|C19orf43_-_12845065.23-P1P2
MDH1	P1P2	significant	MDH1_+_63816088.23-P1P2	GCGCGGAACTGACTCGGAGA	1	1	empirical	MDH1_+_63816094.23-P1P2	GCTCTACCGCGGAACTGACT	2	3	empirical	MDH1_+_63816088.23-P1P2|MDH1_+_63816094.23-P1P2
PDE7A	P1P2	significant	PDE7A_+_66754223.23-P1P2	GGGGAGGAGCAGGACTCcgg	1	2	empirical	PDE7A_+_66754248.23-P1P2	GGGAGTGAAGTCAGGCTCCG	2	3	empirical	PDE7A_+_66754223.23-P1P2|PDE7A_+_66754248.23-P1P2
HOXB3	P1P2	nonessential	HOXB3_+_46667575.23-P1P2	GTTAACTGCTCGCTGTGGTG	1	1	predicted	HOXB3_+_46667506.23-P1P2	GCCAGCCCAGAAGGCAGCGG	2	2	predicted	HOXB3_+_46667575.23-P1P2|HOXB3_+_46667506.23-P1P2
MCAM	P1P2	nonessential	MCAM_-_119187785.23-P1P2	GCAGCAGGCGGCGAGCAAGA	1	1	predicted	MCAM_+_119187806.23-P1P2	GCCCTCCGGCCGGGAAGCAT	2	2	predicted	MCAM_-_119187785.23-P1P2|MCAM_+_119187806.23-P1P2
MKL2	ENST00000318282.5	nonessential	MKL2_-_14173354.23-ENST00000318282.5	GATAGAACCTAGAGTTCTTA	1	1	predicted	MKL2_+_14173269.23-ENST00000318282.5	GGAAAGCAGGCTGTAAGAGG	2	2	predicted	MKL2_-_14173354.23-ENST00000318282.5|MKL2_+_14173269.23-ENST00000318282.5
DEPDC1B	P1P2	nonessential	DEPDC1B_-_59995938.23-P1P2	GCATGGCGCGTAGGCAGCAG	1	1	predicted	DEPDC1B_-_59995929.23-P1P2	GGCGATGCTCCATGGCGCGT	2	2	predicted	DEPDC1B_-_59995938.23-P1P2|DEPDC1B_-_59995929.23-P1P2
RARA	P2	significant	RARA_+_38498675.23-P2	GGCGGGGCCCGGGAACTCAG	1	1	predicted	RARA_-_38498669.23-P2	GCTAGACGGGAGTCCCCTCG	2	2	predicted	RARA_+_38498675.23-P2|RARA_-_38498669.23-P2
RHO	P1P2	nonessential	RHO_-_129247508.23-P1P2	GATCCAGCTGGAGCCCTGAG	1	1	predicted	RHO_-_129247538.23-P1P2	GAGGCCTTCGCAGCATTCTT	2	2	predicted	RHO_-_129247508.23-P1P2|RHO_-_129247538.23-P1P2
SLC22A8	P1P2	nonessential	SLC22A8_-_62783290.23-P1P2	GGCCGGCAGCTGCTGTAGTA	1	1	predicted	SLC22A8_+_62783251.23-P1P2	GCGGCCCCTAGGACAGAGCA	2	2	predicted	SLC22A8_-_62783290.23-P1P2|SLC22A8_+_62783251.23-P1P2
C2orf50	P1P2	nonessential	C2orf50_+_11273284.23-P1P2	GGAGCTCAGAGTGGCCGATG	1	1	predicted	C2orf50_+_11273263.23-P1P2	GGACAGGGCTCTCCGGGCTG	2	2	predicted	C2orf50_+_11273284.23-P1P2|C2orf50_+_11273263.23-P1P2
UNC13C	P1P2	nonessential	UNC13C_-_54305106.23-P1P2	GCACTAATTGCTCTCCATGG	1	1	predicted	UNC13C_-_54305158.23-P1P2	GACATTCATAAGCTTTGCAA	2	2	predicted	UNC13C_-_54305106.23-P1P2|UNC13C_-_54305158.23-P1P2
GALNT8	ENST00000252318.2	significant	GALNT8_-_4829836.23-ENST00000252318.2	GCAGGGAGTGGACGACCCCC	1	5	empirical	GALNT8_+_4829593.23-ENST00000252318.2	Gctttccacaggttgctcag	2	3	empirical	GALNT8_-_4829836.23-ENST00000252318.2|GALNT8_+_4829593.23-ENST00000252318.2
UBE2T	P1P2	significant	UBE2T_-_202310883.23-P1P2	GGAGACCCTCCGCTCAACAG	1	3	empirical	UBE2T_-_202311067.23-P1P2	GAGCAACGCGCGGACCAACG	2	2	empirical	UBE2T_-_202310883.23-P1P2|UBE2T_-_202311067.23-P1P2
GTF3C5	P1P2	significant	GTF3C5_+_135906441.23-P1P2	GCGCTCCCGCCTCAGCTCCA	1	5	empirical	GTF3C5_-_135906397.23-P1P2	GGGGCCCTGCCAGACGCACA	2	3	empirical	GTF3C5_+_135906441.23-P1P2|GTF3C5_-_135906397.23-P1P2
ABHD4	P1P2	nonessential	ABHD4_-_23067199.23-P1P2	GGGGCGGGCTCGCCAGGACC	1	1	predicted	ABHD4_+_23067144.23-P1P2	GCAGCACCAGCTGACCCGGG	2	2	predicted	ABHD4_-_23067199.23-P1P2|ABHD4_+_23067144.23-P1P2
ADORA3	P1	nonessential	ADORA3_+_112031411.23-P1	GGCCTGACCAAAGAGGACAC	1	1	predicted	ADORA3_+_112031386.23-P1	GGTACTGGTGTGGCATCCAG	2	2	predicted	ADORA3_+_112031411.23-P1|ADORA3_+_112031386.23-P1
UNC45A	P2	significant	UNC45A_-_91473443.23-P2	GAGTAACCCGCAATGCGGAA	1	1	predicted	UNC45A_+_91473462.23-P2	GTCAAGCCGCGCGGGAAACT	2	2	predicted	UNC45A_-_91473443.23-P2|UNC45A_+_91473462.23-P2
ANKRD23	P1	nonessential	ANKRD23_-_97523606.23-P1	GGGCCTGGTGAGAACCACGA	1	1	predicted	ANKRD23_+_97523642.23-P1	GGGCGTACAGCAGACGCTGG	2	2	predicted	ANKRD23_-_97523606.23-P1|ANKRD23_+_97523642.23-P1
MTRNR2L3	P1P2	nonessential	MTRNR2L3_-_55934490.23-P1P2	GTGTTAGGAGTTCAGTAGAC	1	1	predicted	MTRNR2L3_-_55934542.23-P1P2	GTAAATGCTTTCTTAATTAG	2	2	predicted	MTRNR2L3_-_55934490.23-P1P2|MTRNR2L3_-_55934542.23-P1P2
ACSL5	P1	nonessential	ACSL5_-_114136040.23-P1	GTCAGAGCAGGGCAGAACTG	1	1	predicted	ACSL5_-_114136013.23-P1	GGCCTGACATGGCCTGACTC	2	2	predicted	ACSL5_-_114136040.23-P1|ACSL5_-_114136013.23-P1
C6orf141	P1P2	nonessential	C6orf141_-_49518436.23-P1P2	GGCAGCAGAGGCCACACCCA	1	1	predicted	C6orf141_-_49518703.23-P1P2	GGGCGGCCACGAGGACAGAA	2	2	predicted	C6orf141_-_49518436.23-P1P2|C6orf141_-_49518703.23-P1P2
LDLRAP1	P1	significant	LDLRAP1_+_25870140.23-P1	GCCGCAGCCAAAACTCCGTC	1	3	empirical	LDLRAP1_+_25870477.23-P1	GGCGCTGCCCCTCCTCGCAG	2	9	empirical	LDLRAP1_+_25870140.23-P1|LDLRAP1_+_25870477.23-P1
MTRNR2L8	P1P2	nonessential	MTRNR2L8_-_10530710.23-P1P2	GAAGCTGTTCGGTAGTAAGG	1	1	predicted	MTRNR2L8_-_10530699.23-P1P2	GTGATTTGGTTAAAGCTGTT	2	2	predicted	MTRNR2L8_-_10530710.23-P1P2|MTRNR2L8_-_10530699.23-P1P2
EME1	P1P2	significant	EME1_+_48450680.23-P1P2	GTGCAGAGCGGTGTTCAGGA	1	5	empirical	EME1_-_48450651.23-P1P2	GAGTTGCAGGTGAGCGTCCC	2	6	empirical	EME1_+_48450680.23-P1P2|EME1_-_48450651.23-P1P2
RSPO4	P1P2	nonessential	RSPO4_+_982943.23-P1P2	GACGCCCTCACTAGACCTGG	1	1	predicted	RSPO4_-_982961.23-P1P2	GCGGCCGCCAGGTCTAGTGA	2	2	predicted	RSPO4_+_982943.23-P1P2|RSPO4_-_982961.23-P1P2
VGLL2	P1P2	nonessential	VGLL2_+_117586727.23-P1P2	GTACTCCCGACCGCGCTCCA	1	1	predicted	VGLL2_-_117586764.23-P1P2	GGGAGTAAAATCGCAGGAGT	2	2	predicted	VGLL2_+_117586727.23-P1P2|VGLL2_-_117586764.23-P1P2
YIF1A	P1P2	nonessential	YIF1A_+_66056534.23-P1P2	GTGGCCTCGGTCGGTACCCT	1	1	predicted	YIF1A_-_66056552.23-P1P2	GGCGCCCAGGGTACCGACCG	2	2	predicted	YIF1A_+_66056534.23-P1P2|YIF1A_-_66056552.23-P1P2
TUBB4B	P2	nonessential	TUBB4B_-_140137625.23-P2	GCGGTTGCCGCCGTGTTCAG	1	1	predicted	TUBB4B_-_140137749.23-P2	GCTGTGACATCCCACCTCGG	2	2	predicted	TUBB4B_-_140137625.23-P2|TUBB4B_-_140137749.23-P2
FAM156B	ENST00000509613.1	nonessential	FAM156B_+_52928418.23-ENST00000509613.1	GGAGGGCCCACTCCATTCAG	1	1	predicted	FAM156B_-_52928455.23-ENST00000509613.1	GGCCCTCAGTAAATACCTGG	2	2	predicted	FAM156B_+_52928418.23-ENST00000509613.1|FAM156B_-_52928455.23-ENST00000509613.1
LXN	P1P2	nonessential	LXN_+_158390491.23-P1P2	GCCCGCTGCAGGCAGTAGTG	1	1	predicted	LXN_-_158390088.23-P1P2	GTGAGACCGCGGGTGAGTGG	2	2	predicted	LXN_+_158390491.23-P1P2|LXN_-_158390088.23-P1P2
DAP	P1P2	nonessential	DAP_-_10761186.23-P1P2	GGGGAGGCGAAGACATGACG	1	1	predicted	DAP_-_10761170.23-P1P2	GTCTCTAGTTTCCCTTCGGG	2	2	predicted	DAP_-_10761186.23-P1P2|DAP_-_10761170.23-P1P2
ACTA1	P1	significant	ACTA1_+_229569796.23-P1	GAAGCCTCGCTTCCCCTCCG	1	3	empirical	ACTA1_+_229569744.23-P1	GGTAGCTACCCGCCCAGGTA	1	1	predicted	ACTA1_+_229569796.23-P1|ACTA1_+_229569744.23-P1
RCSD1	P1P2	nonessential	RCSD1_+_167599385.23-P1P2	GgggagggaggCCGACGATC	1	1	predicted	RCSD1_-_167599717.23-P1P2	GGAGCGGTGAGCGGTGTATC	2	2	predicted	RCSD1_+_167599385.23-P1P2|RCSD1_-_167599717.23-P1P2
CIDEC	P1	nonessential	CIDEC_+_9921901.23-P1	GAGGCTGTGAGGGGGAGGTA	1	1	predicted	CIDEC_+_9921923.23-P1	GGGGACAGGGCAGTATTTCC	2	2	predicted	CIDEC_+_9921901.23-P1|CIDEC_+_9921923.23-P1
TMEM88	P1P2	nonessential	TMEM88_-_7758410.23-P1P2	GGCCATGGCGGATGTCCCCG	1	1	predicted	TMEM88_+_7758443.23-P1P2	GAACAGTCCAGGGGGTCCCG	2	2	predicted	TMEM88_-_7758410.23-P1P2|TMEM88_+_7758443.23-P1P2
BAALC	P1P2	nonessential	BAALC_+_104153027.23-P1P2	GCCGGCCCGCAAGGAGGCGG	1	1	predicted	BAALC_-_104153129.23-P1P2	GTCCCGCGGCGCAGGAGGAT	2	2	predicted	BAALC_+_104153027.23-P1P2|BAALC_-_104153129.23-P1P2
BAI3	P1P2	nonessential	BAI3_+_69345575.23-P1P2	GGAGGGAGAAGCCCCCCCAA	1	1	predicted	BAI3_+_69345291.23-P1P2	GGGACGGCGACTAAGGAGAG	2	2	predicted	BAI3_+_69345575.23-P1P2|BAI3_+_69345291.23-P1P2
BCL6	P1P2	nonessential	BCL6_-_187463200.23-P1P2	GagcaacagcaATAATCACC	1	1	predicted	BCL6_-_187463123.23-P1P2	GTGATCATGagcagcggcgg	3	3	predicted	BCL6_-_187463200.23-P1P2|BCL6_-_187463123.23-P1P2
PCDHGA12	P1P2	nonessential	PCDHGA12_-_140810222.23-P1P2	GTGGGAGTATGTGGAAACAA	1	1	predicted	PCDHGA12_-_140810204.23-P1P2	GCTAGGAATGAACCATCCCT	2	2	predicted	PCDHGA12_-_140810222.23-P1P2|PCDHGA12_-_140810204.23-P1P2
NDUFAF3	P1P2	significant	NDUFAF3_+_49059560.23-P1P2	GGCCATGGCTGACCAACGCG	1	4	empirical	NDUFAF3_-_49059542.23-P1P2	GCTCCCAACCCGGGGACTAA	2	1	empirical	NDUFAF3_+_49059560.23-P1P2|NDUFAF3_-_49059542.23-P1P2
THBD	P1	nonessential	THBD_+_23030257.23-P1	GGCAGCGGCAAGAAGTGTCT	1	1	predicted	THBD_+_23030285.23-P1	GGTCAGAGGCTGCCTCGCAG	2	2	predicted	THBD_+_23030257.23-P1|THBD_+_23030285.23-P1
VENTX	P1P2	nonessential	VENTX_+_135051755.23-P1P2	GCCCCCGGCCCTGACCTAGT	1	1	predicted	VENTX_+_135051640.23-P1P2	GTACCGGCCATGGTCCTCTC	2	2	predicted	VENTX_+_135051755.23-P1P2|VENTX_+_135051640.23-P1P2
HMG20B	P1	significant	HMG20B_-_3573204.23-P1	GCTCCGGGCCCGGCATCCCG	1	1	empirical	HMG20B_+_3573409.23-P1	GGCGGGAGGGACTGGGTCAG	2	8	empirical	HMG20B_-_3573204.23-P1|HMG20B_+_3573409.23-P1
SPCS3	P2	significant	SPCS3_-_177242413.23-P2	GGCCATTGTCAGCCCTGTGA	1	4	empirical	SPCS3_-_177242377.23-P2	GTATTGTTCGAATAGACCTG	1	1	predicted	SPCS3_-_177242413.23-P2|SPCS3_-_177242377.23-P2
RBFOX1	ENST00000311745.5	nonessential	RBFOX1_+_7383044.23-ENST00000311745.5	GGAGCTGCCGGTACAATCAT	1	1	predicted	RBFOX1_-_7382805.23-ENST00000311745.5	GCTGTGTCTCTTCGTCGTCT	2	2	predicted	RBFOX1_+_7383044.23-ENST00000311745.5|RBFOX1_-_7382805.23-ENST00000311745.5
ZBTB3	P1P2	nonessential	ZBTB3_-_62521583.23-P1P2	GCTACCAGGGTGGGAACTAG	1	1	predicted	ZBTB3_-_62521570.23-P1P2	GCAGGGGCTAAGGACTACCA	2	2	predicted	ZBTB3_-_62521583.23-P1P2|ZBTB3_-_62521570.23-P1P2
TMEM145	P1P2	nonessential	TMEM145_+_42817474.23-P1P2	GTCCCGCACTGGCCCGGCAA	1	1	predicted	TMEM145_+_42817485.23-P1P2	GTCCGCTCCGGCTCCCGCAC	2	2	predicted	TMEM145_+_42817474.23-P1P2|TMEM145_+_42817485.23-P1P2
MAB21L3	P1P2	nonessential	MAB21L3_-_116654095.23-P1P2	GGTGGGCAGCACTTACAGGT	1	1	predicted	MAB21L3_-_116654078.23-P1P2	GATAGTGCAGTGGCCTTTGT	2	2	predicted	MAB21L3_-_116654095.23-P1P2|MAB21L3_-_116654078.23-P1P2
CGB7	P1	nonessential	CGB7_-_49568212.23-P1	GGGAGTGGAGATCTTACCTG	1	1	predicted	CGB7_+_49568260.23-P1	GCCTGCAGCCAGCGAGCAGG	2	2	predicted	CGB7_-_49568212.23-P1|CGB7_+_49568260.23-P1
CYB5A	P1P2	nonessential	CYB5A_+_71959106.23-P1P2	GGGCTCGCGGCGAACCGAGA	1	1	predicted	CYB5A_+_71959187.23-P1P2	GCCCGGCGCGGGGAATGTCC	2	2	predicted	CYB5A_+_71959106.23-P1P2|CYB5A_+_71959187.23-P1P2
PHOX2B	P1P2	significant	PHOX2B_+_41750413.23-P1P2	GTGCAGCCTGGGCACCCTCA	1	4	empirical	PHOX2B_-_41750353.23-P1P2	GCTATATACGGGCGGAAAGG	2	3	empirical	PHOX2B_+_41750413.23-P1P2|PHOX2B_-_41750353.23-P1P2
BPIFA1	P2	nonessential	BPIFA1_+_31825613.23-P2	GGGGCTGGATTCACATTCAA	1	1	predicted	BPIFA1_-_31825581.23-P2	GCCCAGACCATGGCCCAGTT	2	2	predicted	BPIFA1_+_31825613.23-P2|BPIFA1_-_31825581.23-P2
PLB1	ENST00000327757.5,ENST00000422425.2	nonessential	PLB1_-_28718979.23-ENST00000327757.5,ENST00000422425.2	GCGAGTCACCTGGAGCATTC	1	1	predicted	PLB1_-_28719208.23-ENST00000327757.5,ENST00000422425.2	GCCTGCGGAATGGGATGCAG	2	2	predicted	PLB1_-_28718979.23-ENST00000327757.5,ENST00000422425.2|PLB1_-_28719208.23-ENST00000327757.5,ENST00000422425.2
ZNF182	P1P2	nonessential	ZNF182_+_47863378.23-P1P2	GCAAAGAGTCGGTCCCGAAG	1	1	predicted	ZNF182_+_47863180.23-P1P2	GTCAGTGGACGAGGTTCTAG	2	2	predicted	ZNF182_+_47863378.23-P1P2|ZNF182_+_47863180.23-P1P2
GJA5	P2	nonessential	GJA5_+_147245372.23-P2	GCCCACGGAAGGAAAGTCCA	1	1	predicted	GJA5_+_147245428.23-P2	GGCTCAAGAGCAAAAAGCGT	2	2	predicted	GJA5_+_147245372.23-P2|GJA5_+_147245428.23-P2
MRPL39	P1P2	essential	MRPL39_+_26979780.23-P1P2	GGTTCTCACCGCTGCTATGG	1	2	essential	MRPL39_+_26979728.23-P1P2	GTCTGGCTGGTCGCACCCGG	2	3	essential	MRPL39_+_26979780.23-P1P2|MRPL39_+_26979728.23-P1P2
MAP6	P1P2	nonessential	MAP6_-_75379593.23-P1P2	GACCCGGGGAGAGCTGTCCT	1	1	predicted	MAP6_-_75378885.23-P1P2	GAGGCCGCAGAGATCTGCAC	2	2	predicted	MAP6_-_75379593.23-P1P2|MAP6_-_75378885.23-P1P2
OR4A15	ENST00000314706.3	nonessential	OR4A15_+_55135397.23-ENST00000314706.3	GTCGGAGCCTACAAACAAAA	1	1	predicted	OR4A15_+_55135421.23-ENST00000314706.3	GTTCTGAAGGTGTTGGACTC	2	2	predicted	OR4A15_+_55135397.23-ENST00000314706.3|OR4A15_+_55135421.23-ENST00000314706.3
ME2	P1P2	significant	ME2_+_48405509.23-P1P2	GCGGGCGGCCCCACACGCAG	1	3	empirical	ME2_-_48405558.23-P1P2	GTGTGAGCCTGAGCTGACGG	2	2	empirical	ME2_+_48405509.23-P1P2|ME2_-_48405558.23-P1P2
LRBA	P1P2	significant	LRBA_-_151936334.23-P1P2	GGGCCCACAAGCTATCACAG	1	1	predicted	LRBA_+_151936206.23-P1P2	GACCTGCACGAGAGTGGGGG	2	2	predicted	LRBA_-_151936334.23-P1P2|LRBA_+_151936206.23-P1P2
CHSY3	P1P2	nonessential	CHSY3_+_129240267.23-P1P2	GGGAGTGAAACTTCTCCcgg	1	1	predicted	CHSY3_+_129240287.23-P1P2	GGGGGCTCCGAGCAAGGGTC	2	2	predicted	CHSY3_+_129240267.23-P1P2|CHSY3_+_129240287.23-P1P2
HPD	P1P2	nonessential	HPD_+_122296746.23-P1P2	GGGCCTCTAGTCCCAGTAGG	1	1	predicted	HPD_+_122296749.23-P1P2	GCCAGGCCTCTAGTCCCAGT	2	2	predicted	HPD_+_122296746.23-P1P2|HPD_+_122296749.23-P1P2
PDCD4	P2	nonessential	PDCD4_+_112657979.23-P2	GAAAAATTCCCCTTAAATGT	1	1	predicted	PDCD4_-_112658005.23-P2	GATTTAAGGGGAATTTTTAA	2	2	predicted	PDCD4_+_112657979.23-P2|PDCD4_-_112658005.23-P2
ERCC2	P1P2	essential	ERCC2_+_45873802.23-P1P2	GCCCCGCTGCACAGTCCGGC	1	7	essential	ERCC2_+_45873591.23-P1P2	GAGGACCTGAGGGTTACCGG	2	5	essential	ERCC2_+_45873802.23-P1P2|ERCC2_+_45873591.23-P1P2
RHBDD3	P1P2	nonessential	RHBDD3_+_29663849.23-P1P2	GCCGGTCGGCAGGGGTCACG	1	1	predicted	RHBDD3_-_29663895.23-P1P2	GGCGCGCCACCCATTCCCCG	2	2	predicted	RHBDD3_+_29663849.23-P1P2|RHBDD3_-_29663895.23-P1P2
SMIM13	P1P2	nonessential	SMIM13_+_11094042.23-P1P2	GCCCAGGCCCCCTACCGCTG	1	1	predicted	SMIM13_-_11094087.23-P1P2	GGGAGAAGCCGCTACAGCCG	2	2	predicted	SMIM13_+_11094042.23-P1P2|SMIM13_-_11094087.23-P1P2
TRIP10	P1	nonessential	TRIP10_-_6739703.23-P1	GCCTCGGCTGAGTCTCCCCG	1	1	predicted	TRIP10_-_6739706.23-P1	GCGGCTGAGTCTCCCCGGGG	2	2	predicted	TRIP10_-_6739703.23-P1|TRIP10_-_6739706.23-P1
FAM46D	P1P2	significant	FAM46D_-_79590984.23-P1P2	GGTCGCTTGGGGGCGTTGGG	1	9	empirical	FAM46D_-_79590956.23-P1P2	GCGGGGAGCGGCGATTAGAA	1	1	predicted	FAM46D_-_79590984.23-P1P2|FAM46D_-_79590956.23-P1P2
UGT2A2	P1P2	nonessential	UGT2A2_-_70518921.23-P1P2	GCTTACCTGAAGTTTCCTGG	1	1	predicted	UGT2A2_-_70518493.23-P1P2	GGTTGTCTTAAGGACCACAG	2	2	predicted	UGT2A2_-_70518921.23-P1P2|UGT2A2_-_70518493.23-P1P2
SSUH2	P1P2	nonessential	SSUH2_-_8693689.23-P1P2	GCACTCACCCCTCCATCCGG	1	1	predicted	SSUH2_-_8693782.23-P1P2	GCACAGTGATGACCAGGAAA	2	2	predicted	SSUH2_-_8693689.23-P1P2|SSUH2_-_8693782.23-P1P2
MYBPC1	P1P2	nonessential	MYBPC1_+_101988754.23-P1P2	GGGCGAGAGATGGTGCAGGT	1	1	predicted	MYBPC1_-_101988814.23-P1P2	GTCAACTAGTCGTGGAGGGA	2	2	predicted	MYBPC1_+_101988754.23-P1P2|MYBPC1_-_101988814.23-P1P2
PGA3	P1P2	nonessential	PGA3_+_60971178.23-P1P2	GTGGAGACAGCTGAATAGAG	1	1	predicted	PGA3_+_60970994.23-P1P2	GTCGAGGGAGAAGGCAAGAC	2	2	predicted	PGA3_+_60971178.23-P1P2|PGA3_+_60970994.23-P1P2
NOB1	P1P2	significant	NOB1_+_69788742.23-P1P2	GATGCGGCTCTGCAGGTACG	1	2	empirical	NOB1_+_69788621.23-P1P2	GCGTTCTGTCCGCAGGACAT	2	1	empirical	NOB1_+_69788742.23-P1P2|NOB1_+_69788621.23-P1P2
CBX1	P1P2	nonessential	CBX1_+_46178553.23-P1P2	GcggcgggAGCCCTGCGTGA	1	1	predicted	CBX1_-_46178513.23-P1P2	GGAAGCAGGACGCTGGACCC	2	2	predicted	CBX1_+_46178553.23-P1P2|CBX1_-_46178513.23-P1P2
APBB1IP	P1P2	nonessential	APBB1IP_+_26727301.23-P1P2	GTCGACGCAAGAGGGACTAA	1	1	predicted	APBB1IP_+_26727562.23-P1P2	GGCCCCTGGTTAGAGACAGT	2	2	predicted	APBB1IP_+_26727301.23-P1P2|APBB1IP_+_26727562.23-P1P2
OR52W1	ENST00000311352.2	nonessential	OR52W1_+_6220392.23-ENST00000311352.2	GCTCCTGACAGGGAAGATAA	1	1	predicted	OR52W1_+_6220419.23-ENST00000311352.2	GACAACTTGAGGGCTCATGG	2	2	predicted	OR52W1_+_6220392.23-ENST00000311352.2|OR52W1_+_6220419.23-ENST00000311352.2
TMEM132B	ENST00000299308.3	nonessential	TMEM132B_+_125811197.23-ENST00000299308.3	GCCCCCGGTGCAGACAGCAG	1	1	predicted	TMEM132B_-_125811165.23-ENST00000299308.3	GGCCTCAGCTCCAGACTCTA	2	2	predicted	TMEM132B_+_125811197.23-ENST00000299308.3|TMEM132B_-_125811165.23-ENST00000299308.3
CYGB	P1P2	nonessential	CYGB_+_74533557.23-P1P2	GAGCGAGGAGCTGTCCGAGG	1	1	predicted	CYGB_-_74533754.23-P1P2	Ggcgaggggtagagcgcgga	2	2	predicted	CYGB_+_74533557.23-P1P2|CYGB_-_74533754.23-P1P2
FAM193A	ENST00000324666.5,ENST00000382839.3,ENST00000502458.1,ENST00000545951.1	nonessential	FAM193A_-_2627419.23-ENST00000324666.5,ENST00000382839.3,ENST00000502458.1,ENST00000545951.1	GCTGACTGGCTGCTTCTCAG	1	1	predicted	FAM193A_-_2627185.23-ENST00000324666.5,ENST00000382839.3,ENST00000502458.1,ENST00000545951.1	GGACATGCAGACCTGCATAT	2	2	predicted	FAM193A_-_2627419.23-ENST00000324666.5,ENST00000382839.3,ENST00000502458.1,ENST00000545951.1|FAM193A_-_2627185.23-ENST00000324666.5,ENST00000382839.3,ENST00000502458.1,ENST00000545951.1
INO80	P1P2	significant	INO80_+_41408265.23-P1P2	GGGCCTCAGAGAGCGAACCG	1	6	empirical	INO80_+_41408150.23-P1P2	GAGGTGAGGCAACTAGACGT	2	4	empirical	INO80_+_41408265.23-P1P2|INO80_+_41408150.23-P1P2
GDF1	P1P2	nonessential	GDF1_+_19006897.23-P1P2	GCGggcgcaggcgacgggca	1	1	predicted	GDF1_-_19006712.23-P1P2	GCCAGCAGCAGCAGCTCGGG	2	2	predicted	GDF1_+_19006897.23-P1P2|GDF1_-_19006712.23-P1P2
LEPREL2	P1P2	nonessential	LEPREL2_+_6937569.23-P1P2	GCGGCAGCCGAGGGGAAATG	1	1	predicted	LEPREL2_-_6937584.23-P1P2	GcGGCTCCCGCATTTCCCCT	2	2	predicted	LEPREL2_+_6937569.23-P1P2|LEPREL2_-_6937584.23-P1P2
AARSD1	P2	nonessential	AARSD1_+_41132061.23-P2	GAGCGGGAGCCGCAATGGCA	1	1	predicted	AARSD1_-_41132037.23-P2	GTCCAGGGAAAAGGGCCAGG	2	2	predicted	AARSD1_+_41132061.23-P2|AARSD1_-_41132037.23-P2
SLU7	P1P2	essential	SLU7_+_159846048.23-P1P2	GATTCTGTCGGATGGACTTG	1	1	essential	SLU7_+_159846060.23-P1P2	GAGATTGGCTTGGATTCTGT	2	2	essential	SLU7_+_159846048.23-P1P2|SLU7_+_159846060.23-P1P2
C3orf36	ENST00000408895.2	nonessential	C3orf36_+_133648644.23-ENST00000408895.2	GTAAGCTGCCATGATGGATG	1	1	predicted	C3orf36_-_133648658.23-ENST00000408895.2	GTCCCCTGCCCCATCCATCA	2	2	predicted	C3orf36_+_133648644.23-ENST00000408895.2|C3orf36_-_133648658.23-ENST00000408895.2
CDH8	P1P2	nonessential	CDH8_+_62070121.23-P1P2	GCAAGCCCTGTAGCTCCGAG	1	1	predicted	CDH8_+_62070112.23-P1P2	GTAGCTCCGAGAGGCATGAA	2	2	predicted	CDH8_+_62070121.23-P1P2|CDH8_+_62070112.23-P1P2
COLEC10	P1P2	nonessential	COLEC10_+_120079552.23-P1P2	GTAGTACCAGGAGGATAAAT	1	1	predicted	COLEC10_-_120079509.23-P1P2	GTCTGGGAGACCCTTTTCTG	2	2	predicted	COLEC10_+_120079552.23-P1P2|COLEC10_-_120079509.23-P1P2
NXT2	P1P2	nonessential	NXT2_-_108780485.23-P1P2	GTGAGCTGGGAAATAGCGAG	1	1	predicted	NXT2_-_108780498.23-P1P2	GAGCGAGAGGCGGGGATGTT	2	2	predicted	NXT2_-_108780485.23-P1P2|NXT2_-_108780498.23-P1P2
FAM156B	ENST00000412319.1,ENST00000452021.2	nonessential	FAM156B_-_52926497.23-ENST00000412319.1,ENST00000452021.2	Gggagagactgagagcgggg	1	1	predicted	FAM156B_-_52926501.23-ENST00000412319.1,ENST00000452021.2	Gagactgagagcgggggggt	2	2	predicted	FAM156B_-_52926497.23-ENST00000412319.1,ENST00000452021.2|FAM156B_-_52926501.23-ENST00000412319.1,ENST00000452021.2
MTFR2	P1P2	nonessential	MTFR2_+_136571392.23-P1P2	GTAGGGACTAGCAGGTGGGT	1	1	predicted	MTFR2_+_136571409.23-P1P2	GAAGTAGCAGTCCGGTCCTA	2	2	predicted	MTFR2_+_136571392.23-P1P2|MTFR2_+_136571409.23-P1P2
TRPC3	P1P2	nonessential	TRPC3_-_122872645.23-P1P2	GCCGGCCCGTGGGAGAAGGG	1	1	predicted	TRPC3_+_122872699.23-P1P2	GGGCTGGAGGGGCGTCAACG	2	2	predicted	TRPC3_-_122872645.23-P1P2|TRPC3_+_122872699.23-P1P2
CNKSR3	P1P2	nonessential	CNKSR3_+_154831733.23-P1P2	GCTGCCAGGGCGGCACGGGA	1	1	predicted	CNKSR3_+_154831730.23-P1P2	GCCAGGGCGGCACGGGAGGG	2	2	predicted	CNKSR3_+_154831733.23-P1P2|CNKSR3_+_154831730.23-P1P2
FNDC9	P1P2	nonessential	FNDC9_-_156772590.23-P1P2	GGTTAGAGCTCTGCCCTCCG	1	1	predicted	FNDC9_+_156772581.23-P1P2	GTAATCTACTGCACCTCGGA	2	2	predicted	FNDC9_-_156772590.23-P1P2|FNDC9_+_156772581.23-P1P2
STAG2	P2	significant	STAG2_-_123094585.23-P2	GGTCCCTGAGTAGAATTCGA	1	1	predicted	STAG2_+_123094550.23-P2	GTCAGGGACGGAAGCTCCCG	2	2	predicted	STAG2_-_123094585.23-P2|STAG2_+_123094550.23-P2
PNLIP	P1P2	nonessential	PNLIP_-_118305715.23-P1P2	GAACACGGTCAGGAGGGCTA	1	1	predicted	PNLIP_+_118305465.23-P1P2	GACATGTTCCCGACTCACCG	2	2	predicted	PNLIP_-_118305715.23-P1P2|PNLIP_+_118305465.23-P1P2
ZNF107	P1P2	nonessential	ZNF107_+_64126714.23-P1P2	GAGCCACAGCCACTTCCGAT	1	1	predicted	ZNF107_-_64126760.23-P1P2	GCTCGGGCCTCCAAAGTCCG	2	2	predicted	ZNF107_+_64126714.23-P1P2|ZNF107_-_64126760.23-P1P2
MSS51	P1P2	nonessential	MSS51_+_75193269.23-P1P2	GGGAAGCTGAGGACTTAGCA	1	1	predicted	MSS51_-_75193075.23-P1P2	GAAACGTCTTTGGAGAGGTA	2	2	predicted	MSS51_+_75193269.23-P1P2|MSS51_-_75193075.23-P1P2
DUSP21	P1P2	nonessential	DUSP21_-_44703299.23-P1P2	GCACCTAGCCTGAGACTTGG	1	1	predicted	DUSP21_+_44703285.23-P1P2	GAGCCGCGCCGCCAAGTCTC	2	2	predicted	DUSP21_-_44703299.23-P1P2|DUSP21_+_44703285.23-P1P2
MGLL	P1P2	nonessential	MGLL_-_127542036.23-P1P2	GGCTTCGCGGCGACAGGGTG	1	1	predicted	MGLL_+_127541836.23-P1P2	GTCCCGGACACGCCCGGCGT	2	2	predicted	MGLL_-_127542036.23-P1P2|MGLL_+_127541836.23-P1P2
NPHS2	P1P2	nonessential	NPHS2_-_179545046.23-P1P2	GAGCAGCGCGGGAGCGCTAG	1	1	predicted	NPHS2_-_179545052.23-P1P2	GGCGGGAGCGCTAGGGGCAC	2	2	predicted	NPHS2_-_179545046.23-P1P2|NPHS2_-_179545052.23-P1P2
ATCAY	P1P2	nonessential	ATCAY_-_3880723.23-P1P2	GGAAGAAGCAGCTACCTCGG	1	1	predicted	ATCAY_-_3880720.23-P1P2	GTGGGAAGAAGCAGCTACCT	2	2	predicted	ATCAY_-_3880723.23-P1P2|ATCAY_-_3880720.23-P1P2
C20orf78	P1P2	nonessential	C20orf78_-_18810786.23-P1P2	GCTGTGCTGAGTGTCCTCAC	1	1	predicted	C20orf78_+_18810747.23-P1P2	GACAGTGTGGGCAACCGGAC	2	2	predicted	C20orf78_-_18810786.23-P1P2|C20orf78_+_18810747.23-P1P2
PGRMC1	P1P2	nonessential	PGRMC1_+_118370304.23-P1P2	GGATCTCTGGAGTAAAGGTT	1	1	predicted	PGRMC1_-_118370267.23-P1P2	GCACTCGCTCGCTCAGAGGG	2	2	predicted	PGRMC1_+_118370304.23-P1P2|PGRMC1_-_118370267.23-P1P2
PTPN20B	ENST00000331650.4,ENST00000395668.1	nonessential	PTPN20B_+_48827877.23-ENST00000331650.4,ENST00000395668.1	GGGTTGCAGCGGGACAGTTG	1	1	predicted	PTPN20B_+_48827846.23-ENST00000331650.4,ENST00000395668.1	GAGGCCCAGGTGAGGAAAGG	2	2	predicted	PTPN20B_+_48827877.23-ENST00000331650.4,ENST00000395668.1|PTPN20B_+_48827846.23-ENST00000331650.4,ENST00000395668.1
C3orf80	P1P2	nonessential	C3orf80_+_159943620.23-P1P2	GTGTCCAGGAAGGCGTGCAG	1	1	predicted	C3orf80_-_159943648.23-P1P2	GACGCCTTCCTGGACAACGT	2	2	predicted	C3orf80_+_159943620.23-P1P2|C3orf80_-_159943648.23-P1P2
TOP2A	P1P2	essential	TOP2A_+_38574121.23-P1P2	GACGCGCGTCTGTGGAGAAG	1	1	essential	TOP2A_+_38573936.23-P1P2	GCGTGACGGGTGAAGCTCTG	2	8	essential	TOP2A_+_38574121.23-P1P2|TOP2A_+_38573936.23-P1P2
INSC	P1P2	nonessential	INSC_+_15136506.23-P1P2	GTAGTGCGAGCGGCCAGTGG	1	1	predicted	INSC_+_15136516.23-P1P2	GGACAGGCTGGTAGTGCGAG	2	2	predicted	INSC_+_15136506.23-P1P2|INSC_+_15136516.23-P1P2
ORC6	P1P2	significant	ORC6_+_46723646.23-P1P2	GCTCGGCGAGGCCCAGGCGC	1	1	empirical	ORC6_+_46723615.23-P1P2	GCCGATCAGCTCCGACCCCA	2	3	empirical	ORC6_+_46723646.23-P1P2|ORC6_+_46723615.23-P1P2
NME3	P1P2	nonessential	NME3_+_1821311.23-P1P2	GTGCGGCGCTTCGAGAGGAA	1	1	predicted	NME3_-_1821526.23-P1P2	GAGCGAAGATGGTCAGCACC	2	2	predicted	NME3_+_1821311.23-P1P2|NME3_-_1821526.23-P1P2
FXYD2	P2	nonessential	FXYD2_-_117698753.23-P2	GGGAGCTGCTGGTTGTGTCC	1	1	predicted	FXYD2_+_117698783.23-P2	GCACTCTCCATCCAGGCCCC	2	2	predicted	FXYD2_-_117698753.23-P2|FXYD2_+_117698783.23-P2
TNNI2	P2	nonessential	TNNI2_+_1861494.23-P2	GGGGCTCCTGAGGCCATGAT	1	1	predicted	TNNI2_-_1861475.23-P2	GTGTCCCAGTGCAAGGTCTG	2	2	predicted	TNNI2_+_1861494.23-P2|TNNI2_-_1861475.23-P2
CNNM3	P1P2	significant	CNNM3_-_97482020.23-P1P2	GAGGGGGCAGCAGGCGATGG	1	2	empirical	CNNM3_-_97482001.23-P1P2	GGGCTGCGCGAGAGGCCGAG	2	6	empirical	CNNM3_-_97482020.23-P1P2|CNNM3_-_97482001.23-P1P2
GNB1L	P1P2	significant	GNB1L_+_19842341.23-P1P2	GGTTCCCGACTCCGGCAAGA	1	5	empirical	GNB1L_-_19842322.23-P1P2	GGAGTTCAAGCCGGCCGCCC	2	2	empirical	GNB1L_+_19842341.23-P1P2|GNB1L_-_19842322.23-P1P2
CSNK1A1L	P1P2	nonessential	CSNK1A1L_+_37678717.23-P1P2	GCTGCCGTGGCAAGGACTAA	1	1	predicted	CSNK1A1L_-_37679730.23-P1P2	GCTGCTGCCACCGCTACCAA	2	2	predicted	CSNK1A1L_+_37678717.23-P1P2|CSNK1A1L_-_37679730.23-P1P2
GLUL	P1P2	significant	GLUL_+_182360471.23-P1P2	GTGCGCCCTGGGGCTCGCAG	1	5	empirical	GLUL_+_182360879.23-P1P2	GGAGCGTGTGAGCAGTACTG	2	2	empirical	GLUL_+_182360471.23-P1P2|GLUL_+_182360879.23-P1P2
LRRC32	P1P2	nonessential	LRRC32_+_76381743.23-P1P2	GTCCTCGGGCCGTGACCCCG	1	1	predicted	LRRC32_+_76381576.23-P1P2	GTCTAGCGAGCGCAAGGCGG	2	2	predicted	LRRC32_+_76381743.23-P1P2|LRRC32_+_76381576.23-P1P2
RABEPK	P1P2	nonessential	RABEPK_+_127962850.23-P1P2	GCCCCGGACTGCAATACCTG	1	1	predicted	RABEPK_-_127962829.23-P1P2	GCCCCTCCGGGGTGGAGTCA	2	2	predicted	RABEPK_+_127962850.23-P1P2|RABEPK_-_127962829.23-P1P2
POLG2	P1P2	essential	POLG2_+_62493131.23-P1P2	GACGGTAGTGGTGGCTTGTT	1	4	essential	POLG2_+_62493140.23-P1P2	GATTCTGTTAACGGTAGTGG	2	1	essential	POLG2_+_62493131.23-P1P2|POLG2_+_62493140.23-P1P2
PNCK	P1P2	nonessential	PNCK_+_152939246.23-P1P2	GACTGCGCGGCACGACGCTG	1	1	predicted	PNCK_-_152939020.23-P1P2	GAAGACCGCGGCCACCCACG	2	2	predicted	PNCK_+_152939246.23-P1P2|PNCK_-_152939020.23-P1P2
ISYNA1	P1P2	nonessential	ISYNA1_-_18548921.23-P1P2	GACCGGCGCAGAGTCGACTC	1	1	predicted	ISYNA1_-_18548778.23-P1P2	GCTCTCGACGAAGAACTGGG	2	2	predicted	ISYNA1_-_18548921.23-P1P2|ISYNA1_-_18548778.23-P1P2
UPF2	P1P2	significant	UPF2_+_12084799.23-P1P2	GGAGGGGAGAGCCCGAGCGC	1	1	empirical	UPF2_+_12084793.23-P1P2	GAGAGCCCGAGCGCTGGAGT	2	2	empirical	UPF2_+_12084799.23-P1P2|UPF2_+_12084793.23-P1P2
EXTL2	P1P2	nonessential	EXTL2_-_101360384.23-P1P2	GAAGTGAGCGCCTGGAGCAA	1	1	predicted	EXTL2_+_101360354.23-P1P2	GCAGGCGCTCACTTTGCGGG	2	2	predicted	EXTL2_-_101360384.23-P1P2|EXTL2_+_101360354.23-P1P2
PILRB	P1P2	nonessential	PILRB_+_99933756.23-P1P2	GAATCCACGCCAGGCCACGA	1	1	predicted	PILRB_+_99933765.23-P1P2	GAACGCTCGGAATCCACGCC	2	2	predicted	PILRB_+_99933756.23-P1P2|PILRB_+_99933765.23-P1P2
RPS23	P1P2	essential	RPS23_+_81574137.23-P1P2	GCCCGTGGCGCCGACAGGAT	1	1	essential	RPS23_+_81574124.23-P1P2	GCAGGATGGGTGAGCTGTTG	2	3	essential	RPS23_+_81574137.23-P1P2|RPS23_+_81574124.23-P1P2
TMEM202	P1P2	significant	TMEM202_-_72690952.23-P1P2	GGGGTGACCCTGGGGATCAG	1	7	empirical	TMEM202_+_72690699.23-P1P2	GTTTGGGAACCTCAGGACTG	2	4	empirical	TMEM202_-_72690952.23-P1P2|TMEM202_+_72690699.23-P1P2
ACOX2	P1	nonessential	ACOX2_+_58522893.23-P1	GAGGCTGCGGCCTACAGCCG	1	1	predicted	ACOX2_+_58522888.23-P1	GGCGGCCTACAGCCGGGGAG	2	2	predicted	ACOX2_+_58522893.23-P1|ACOX2_+_58522888.23-P1
DPF1	P2	nonessential	DPF1_-_38714760.23-P2	GCCGGCCCGCACCACCTCAG	1	1	predicted	DPF1_+_38714778.23-P2	GCAGGACCCGGGGAGCAAGA	2	2	predicted	DPF1_-_38714760.23-P2|DPF1_+_38714778.23-P2
PML	P1P2	nonessential	PML_+_74287090.23-P1P2	GTGCGTGAAGAGAAGCTGAA	1	1	predicted	PML_-_74287149.23-P1P2	GGAGAATCGAAACTAAGCTG	2	2	predicted	PML_+_74287090.23-P1P2|PML_-_74287149.23-P1P2
ANKRA2	P1P2	significant	ANKRA2_+_72861001.23-P1P2	GGCAAGAGTCTCCCCTCCAG	1	7	empirical	ANKRA2_-_72861459.23-P1P2	GTTCTGGGTCACCAGAGCAG	2	9	empirical	ANKRA2_+_72861001.23-P1P2|ANKRA2_-_72861459.23-P1P2
DIXDC1	ENST00000440460.2	nonessential	DIXDC1_+_111807964.23-ENST00000440460.2	GGGGCGCGCACTAGGTTGAG	1	1	predicted	DIXDC1_+_111807906.23-ENST00000440460.2	GGAAAGCCGCACGGCCAGGC	2	2	predicted	DIXDC1_+_111807964.23-ENST00000440460.2|DIXDC1_+_111807906.23-ENST00000440460.2
PDE4D	P1P2	nonessential	PDE4D_-_59064414.23-P1P2	GACGGTCCCGGAAATGTCCA	1	1	predicted	PDE4D_-_59064373.23-P1P2	GTACAGCTGGCAAGAATCCA	2	2	predicted	PDE4D_-_59064414.23-P1P2|PDE4D_-_59064373.23-P1P2
THAP6	P1P2	nonessential	THAP6_-_76439671.23-P1P2	GGGTTCCCGGGGCTACGAGG	1	1	predicted	THAP6_-_76439744.23-P1P2	GGCTAACGGTAATAACTCTT	2	2	predicted	THAP6_-_76439671.23-P1P2|THAP6_-_76439744.23-P1P2
PELI3	P1P2	nonessential	PELI3_+_66234367.23-P1P2	GCTCGTCACGGGGACACCCA	1	1	predicted	PELI3_-_66234397.23-P1P2	GTCCCCGTGACGAGGCAGCG	2	2	predicted	PELI3_+_66234367.23-P1P2|PELI3_-_66234397.23-P1P2
DARS2	P1P2	significant	DARS2_-_173793792.23-P1P2	GATTCCTTCCCGGTAATCTT	1	10	empirical	DARS2_+_173793774.23-P1P2	GGTGCCCAAGATTACCGGGA	2	8	empirical	DARS2_-_173793792.23-P1P2|DARS2_+_173793774.23-P1P2
TNK2	P2	nonessential	TNK2_-_195619544.23-P2	GACAGCTGGCCGGTCTGGCA	1	1	predicted	TNK2_-_195619566.23-P2	GAGCAGAGCTTTCCTCACGC	2	2	predicted	TNK2_-_195619544.23-P2|TNK2_-_195619566.23-P2
C1orf50	P1P2	nonessential	C1orf50_+_43233182.23-P1P2	GGTCGGGGTGAGCTCCACCA	1	1	predicted	C1orf50_-_43232988.23-P1P2	GGGATAAGGCGCTGTCATGG	2	2	predicted	C1orf50_+_43233182.23-P1P2|C1orf50_-_43232988.23-P1P2
IL17RE	P1P2	nonessential	IL17RE_+_9944559.23-P1P2	GTGCATGGCCTGAAGGTGGG	1	1	predicted	IL17RE_+_9944613.23-P1P2	GCCAGTCTGGAGCTCCCCAT	2	2	predicted	IL17RE_+_9944559.23-P1P2|IL17RE_+_9944613.23-P1P2
NLGN1	ENST00000401917.3	nonessential	NLGN1_+_173322453.23-ENST00000401917.3	GCAATGGGGCACCCAATCCC	1	1	predicted	NLGN1_-_173322458.23-ENST00000401917.3	GTGGCATGCTTGGTACACCG	2	2	predicted	NLGN1_+_173322453.23-ENST00000401917.3|NLGN1_-_173322458.23-ENST00000401917.3
PGLYRP4	P1P2	nonessential	PGLYRP4_+_153321145.23-P1P2	GCTAGGGCTAGGGAGAGTGA	1	1	predicted	PGLYRP4_-_153321250.23-P1P2	GAGGATCCCTAACAAAAGAT	2	2	predicted	PGLYRP4_+_153321145.23-P1P2|PGLYRP4_-_153321250.23-P1P2
DENND4B	P1	nonessential	DENND4B_-_153917727.23-P1	GAGCAGGGGCCCAGAAGCGT	1	1	predicted	DENND4B_-_153917669.23-P1	GAGGGTCCTGAGGCGCCCCA	2	2	predicted	DENND4B_-_153917727.23-P1|DENND4B_-_153917669.23-P1
MRC2	P1P2	nonessential	MRC2_+_60705091.23-P1P2	GACGCGCTGTGGCAGCCCCG	1	1	predicted	MRC2_-_60705073.23-P1P2	GGAGGACGCGAGCCCCTTGC	2	2	predicted	MRC2_+_60705091.23-P1P2|MRC2_-_60705073.23-P1P2
PDPR	P1P2	nonessential	PDPR_+_70148257.23-P1P2	GCAGTTGCCTGGGGTCGCCG	1	1	predicted	PDPR_+_70148512.23-P1P2	GACCTTACGGGGACGAGTAC	2	2	predicted	PDPR_+_70148257.23-P1P2|PDPR_+_70148512.23-P1P2
MAGT1	P1P2	nonessential	MAGT1_+_77150892.23-P1P2	GAGCGAACATGGCAGCGCGT	1	1	predicted	MAGT1_+_77150858.23-P1P2	GGTCTCTGTGACCATGGTGG	2	2	predicted	MAGT1_+_77150892.23-P1P2|MAGT1_+_77150858.23-P1P2
RSF1	P1P2	nonessential	RSF1_-_77531824.23-P1P2	GAAGTTGTGGTGCCGAGGGA	1	1	predicted	RSF1_-_77531924.23-P1P2	GCGATCCCACAATACATCGG	2	2	predicted	RSF1_-_77531824.23-P1P2|RSF1_-_77531924.23-P1P2
TSPAN1	P1	nonessential	TSPAN1_+_46646237.23-P1	GCCGGGTGTTGCCACTGAGT	1	1	predicted	TSPAN1_+_46646233.23-P1	GGTGTTGCCACTGAGTGGGC	2	2	predicted	TSPAN1_+_46646237.23-P1|TSPAN1_+_46646233.23-P1
MBIP	P1P2	significant	MBIP_+_36789486.23-P1P2	GGTCGGAGTGAGGAGGACGG	1	10	empirical	MBIP_+_36789822.23-P1P2	GTGTGAGCAAATCTTGGTGG	2	1	empirical	MBIP_+_36789486.23-P1P2|MBIP_+_36789822.23-P1P2
PRDM4	P1P2	significant	PRDM4_-_108154509.23-P1P2	GGCATCTCGGGGAACACCTG	1	5	empirical	PRDM4_+_108154901.23-P1P2	GAAACGCGCCGCAGAGGGTG	2	4	empirical	PRDM4_-_108154509.23-P1P2|PRDM4_+_108154901.23-P1P2
KRT2	P1P2	nonessential	KRT2_-_53045956.23-P1P2	GGTCCAGGGAGGAAAGTCAC	1	1	predicted	KRT2_-_53045945.23-P1P2	GATGATGCCTTTGTCCAGGG	2	2	predicted	KRT2_-_53045956.23-P1P2|KRT2_-_53045945.23-P1P2
CACNB3	P2	nonessential	CACNB3_+_49209404.23-P2	GCCGAGGCGGGAGCAAAACC	1	1	predicted	CACNB3_-_49209408.23-P2	GAGCGTGCAGAGCAGCGGCC	2	2	predicted	CACNB3_+_49209404.23-P2|CACNB3_-_49209408.23-P2
UBE2B	P1P2	significant	UBE2B_-_133707036.23-P1P2	GGGAACCGCGCCCCGCTGAA	1	1	empirical	UBE2B_-_133707319.23-P1P2	GGCCCGGAGGAGGCTCATGC	2	2	predicted	UBE2B_-_133707036.23-P1P2|UBE2B_-_133707319.23-P1P2
TEKT3	P1P2	nonessential	TEKT3_+_15244905.23-P1P2	GTGGTCTGGGCCCCAGTCGA	1	1	predicted	TEKT3_-_15244840.23-P1P2	GAGCGAGACCACTCACCTGT	2	2	predicted	TEKT3_+_15244905.23-P1P2|TEKT3_-_15244840.23-P1P2
PDGFC	P1P2	nonessential	PDGFC_-_157892924.23-P1P2	GGGGCTCCGCGCTAACCTCG	1	1	predicted	PDGFC_+_157892917.23-P1P2	GGACGCCGCGCGTAGCCCCG	2	2	predicted	PDGFC_-_157892924.23-P1P2|PDGFC_+_157892917.23-P1P2
PLEKHA3	P1P2	nonessential	PLEKHA3_-_179345209.23-P1P2	GGGAAGTGAAATCGACGTCG	1	1	predicted	PLEKHA3_-_179345228.23-P1P2	GGGGTCAATGAAAACAAACG	2	2	predicted	PLEKHA3_-_179345209.23-P1P2|PLEKHA3_-_179345228.23-P1P2
CELF3	P1P2	nonessential	CELF3_+_151689252.23-P1P2	GTTGTTGAGGAGAGCGCGGC	1	1	predicted	CELF3_-_151689234.23-P1P2	GCCTGCTTTCCCGGTCACCT	2	2	predicted	CELF3_+_151689252.23-P1P2|CELF3_-_151689234.23-P1P2
IL17D	P2	nonessential	IL17D_+_21289782.23-P2	Gaacactacatccaaggagt	1	1	predicted	IL17D_+_21289788.23-P2	Gagacttaacactacatcca	2	2	predicted	IL17D_+_21289782.23-P2|IL17D_+_21289788.23-P2
VPS33B	P1P2	nonessential	VPS33B_+_91565735.23-P1P2	GAGACCGGAATCCTGCTGAC	1	1	predicted	VPS33B_+_91565597.23-P1P2	GAGGAGCGAGGGCCCATCTG	2	2	predicted	VPS33B_+_91565735.23-P1P2|VPS33B_+_91565597.23-P1P2
ACAD8	P1P2	nonessential	ACAD8_-_134123507.23-P1P2	GCGGCGGCTATGCTGTGGAG	1	1	predicted	ACAD8_-_134123448.23-P1P2	GGCCAGTGCGAGCGCAACGG	2	2	predicted	ACAD8_-_134123507.23-P1P2|ACAD8_-_134123448.23-P1P2
GNL2	P1P2	essential	GNL2_+_38061508.23-P1P2	GGGTCCGGCGTGGTTCAGGC	1	9	essential	GNL2_+_38061333.23-P1P2	GAGGCGGCAGGGCTGATCGA	2	3	essential	GNL2_+_38061508.23-P1P2|GNL2_+_38061333.23-P1P2
GNGT2	P1	nonessential	GNGT2_+_47287798.23-P1	GGCAGAGGAAGCCAAGGTCG	1	1	predicted	GNGT2_+_47287555.23-P1	GGTCATACCAGAGGACTGTG	2	2	predicted	GNGT2_+_47287798.23-P1|GNGT2_+_47287555.23-P1
ZNF343	P1P2	significant	ZNF343_+_2489539.23-P1P2	GGGTCGGTGGCCGAGATCCC	1	1	empirical	ZNF343_-_2489551.23-P1P2	GGCCAGCGTGCCCGGGATCT	2	6	empirical	ZNF343_+_2489539.23-P1P2|ZNF343_-_2489551.23-P1P2
ATAD2B	P1P2	nonessential	ATAD2B_+_24149925.23-P1P2	GGCGAGAACGGGAGAGAAAG	1	1	predicted	ATAD2B_+_24149936.23-P1P2	GGGAGCTCGAGAGCGAGAAC	2	2	predicted	ATAD2B_+_24149925.23-P1P2|ATAD2B_+_24149936.23-P1P2
OR8B8	ENST00000328064.2	nonessential	OR8B8_-_124311011.23-ENST00000328064.2	GAGGCATTCTGTGGGGACAA	1	1	predicted	OR8B8_-_124311004.23-ENST00000328064.2	GTCATTTAAGGCATTCTGTG	2	2	predicted	OR8B8_-_124311011.23-ENST00000328064.2|OR8B8_-_124311004.23-ENST00000328064.2
PRMT2	P1P2	significant	PRMT2_-_48056006.23-P1P2	GGCCCCTGCCCCGAAGCTCG	1	6	empirical	PRMT2_+_48055615.23-P1P2	GGCCAGCGCGGAGGGGTGGA	2	3	empirical	PRMT2_-_48056006.23-P1P2|PRMT2_+_48055615.23-P1P2
KIAA2013	P1P2	significant	KIAA2013_-_11986143.23-P1P2	GCCGGCTCACCGCGGGACCA	1	3	empirical	KIAA2013_+_11986450.23-P1P2	GCTGGAGGCCACCGAGAAGA	1	1	predicted	KIAA2013_-_11986143.23-P1P2|KIAA2013_+_11986450.23-P1P2
LILRA4	P1P2	nonessential	LILRA4_+_54850291.23-P1P2	GGGAGGAGAGACCCTAGTCT	1	1	predicted	LILRA4_-_54850358.23-P1P2	GGAGCAGGCTTGTGAGAATG	2	2	predicted	LILRA4_+_54850291.23-P1P2|LILRA4_-_54850358.23-P1P2
MAPKAP1	P1	significant	MAPKAP1_+_128469461.23-P1	GTGTGCGGCTCGGGGTAATA	1	1	empirical	MAPKAP1_+_128469405.23-P1	GGGGGCATGAGGGCTAACCC	2	7	empirical	MAPKAP1_+_128469461.23-P1|MAPKAP1_+_128469405.23-P1
ANO2	P1P2	nonessential	ANO2_-_6054389.23-P1P2	GCCCGGGAGTCGCCATGATG	1	1	predicted	ANO2_+_6054306.23-P1P2	GCTACAGGTGGTAGGAGGGA	2	2	predicted	ANO2_-_6054389.23-P1P2|ANO2_+_6054306.23-P1P2
CPM	P1P2	nonessential	CPM_-_69326954.23-P1P2	Ggcgcacctctacccacccg	1	1	predicted	CPM_+_69326926.23-P1P2	Gtgggtagaggtgcgcgcct	2	2	predicted	CPM_-_69326954.23-P1P2|CPM_+_69326926.23-P1P2
HSP90AB1	P1P2	significant	HSP90AB1_-_44214853.23-P1P2	GTAGCTCTCTCGAGTCACTC	1	5	empirical	HSP90AB1_-_44214865.23-P1P2	GGTCACTCCGGCGCAGTGTT	2	1	empirical	HSP90AB1_-_44214853.23-P1P2|HSP90AB1_-_44214865.23-P1P2
FIGNL2	P1P2	nonessential	FIGNL2_-_52215623.23-P1P2	GAGGGCCCGTACCCCGGAGG	1	1	predicted	FIGNL2_-_52215620.23-P1P2	GCTGAGGGCCCGTACCCCGG	2	2	predicted	FIGNL2_-_52215623.23-P1P2|FIGNL2_-_52215620.23-P1P2
CAPN2	P1P2	nonessential	CAPN2_+_223900300.23-P1P2	GACTGCGCAGAGAAAGGTCG	1	1	predicted	CAPN2_+_223900206.23-P1P2	GGCTGCGAGCGATGATTCAC	2	2	predicted	CAPN2_+_223900300.23-P1P2|CAPN2_+_223900206.23-P1P2
BAGE5	P1P2	nonessential	BAGE5_-_11098934.23-P1P2	Ggataccagagaccctaaac	1	1	predicted	BAGE5_+_11098924.23-P1P2	Gcaggcctcacgccagttta	2	2	predicted	BAGE5_-_11098934.23-P1P2|BAGE5_+_11098924.23-P1P2
CD19	P1P2	nonessential	CD19_+_28943301.23-P1P2	GATGGTGGTCAGACTCTCCG	1	1	predicted	CD19_+_28943364.23-P1P2	GTCCTCGGGCCTGACTTCCA	2	2	predicted	CD19_+_28943301.23-P1P2|CD19_+_28943364.23-P1P2
CYFIP1	P1P2	significant	CYFIP1_+_22893097.23-P1P2	GCGCGGAATCCGGGATCCGG	1	3	empirical	CYFIP1_+_22892711.23-P1P2	GTTGGCCGAGTGAGTCACTC	2	4	empirical	CYFIP1_+_22893097.23-P1P2|CYFIP1_+_22892711.23-P1P2
SEC16B	P1P2	nonessential	SEC16B_+_177953387.23-P1P2	GAACAGCAGGCTGTCATGAT	1	1	predicted	SEC16B_+_177953348.23-P1P2	GGCAGCAACTCCTGATTTAG	2	2	predicted	SEC16B_+_177953387.23-P1P2|SEC16B_+_177953348.23-P1P2
ASTN2	P1P2	nonessential	ASTN2_-_120177339.23-P1P2	GGGACGCCCGAGCTAAGGAG	1	1	predicted	ASTN2_-_120177334.23-P1P2	GAACCAGGACGCCCGAGCTA	2	2	predicted	ASTN2_-_120177339.23-P1P2|ASTN2_-_120177334.23-P1P2
SETD7	P1P2	nonessential	SETD7_+_140477340.23-P1P2	GAGCCGCCGGGAGCACCCAG	1	1	predicted	SETD7_-_140477359.23-P1P2	GTCCCTCTGGGTGCTCCCGG	2	2	predicted	SETD7_+_140477340.23-P1P2|SETD7_-_140477359.23-P1P2
C14orf37	ENST00000267485.7	nonessential	C14orf37_+_58618906.23-ENST00000267485.7	GCCCCTAGCGTCCCAGACAG	1	1	predicted	C14orf37_+_58618903.23-ENST00000267485.7	GCTAGCGTCCCAGACAGCGG	2	2	predicted	C14orf37_+_58618906.23-ENST00000267485.7|C14orf37_+_58618903.23-ENST00000267485.7
FAM229A	P1P2	nonessential	FAM229A_-_32827628.23-P1P2	GTGGCCGCGGGAGAACGCTC	1	1	predicted	FAM229A_-_32827685.23-P1P2	GCGGGCCCGGGCGTCGAGGA	2	2	predicted	FAM229A_-_32827628.23-P1P2|FAM229A_-_32827685.23-P1P2
URI1	P1P2	significant	URI1_+_30433533.23-P1P2	GCGCAGCCGCGCCACATCCG	1	6	empirical	URI1_+_30433164.23-P1P2	GGGCCCAGCCAGGCGTCGCG	2	1	empirical	URI1_+_30433533.23-P1P2|URI1_+_30433164.23-P1P2
NRG2	P1P2	nonessential	NRG2_-_139422797.23-P1P2	GCGGGGAGGTGGCCCAGCTA	1	1	predicted	NRG2_+_139422852.23-P1P2	GAGGTCCTGGCGCACAGGGT	2	2	predicted	NRG2_-_139422797.23-P1P2|NRG2_+_139422852.23-P1P2
RAB19	P1P2	nonessential	RAB19_-_140103889.23-P1P2	GACGCCAAACCCGACACCTG	1	1	predicted	RAB19_+_140103877.23-P1P2	GTAGTTCTGGCCCCAGGTGT	2	2	predicted	RAB19_-_140103889.23-P1P2|RAB19_+_140103877.23-P1P2
SLC7A10	P1P2	nonessential	SLC7A10_+_33716696.23-P1P2	GGGCGCTGTCCCGGCTGCGA	1	1	predicted	SLC7A10_+_33716644.23-P1P2	Ggcggccggccggacagacg	2	2	predicted	SLC7A10_+_33716696.23-P1P2|SLC7A10_+_33716644.23-P1P2
CT45A1	ENST00000370741.3,ENST00000482795.1,ENST00000497301.2	nonessential	CT45A1_+_134847640.23-ENST00000370741.3,ENST00000482795.1,ENST00000497301.2	GGCCCCCCGGCCTCACAACA	1	1	predicted	CT45A1_+_134847478.23-ENST00000370741.3,ENST00000482795.1,ENST00000497301.2	GGGAAAAAGGACACTTTCTg	2	2	predicted	CT45A1_+_134847640.23-ENST00000370741.3,ENST00000482795.1,ENST00000497301.2|CT45A1_+_134847478.23-ENST00000370741.3,ENST00000482795.1,ENST00000497301.2
SMARCA1	P1P2	nonessential	SMARCA1_-_128657372.23-P1P2	GTGGGAGCGGGAACGAGTAG	1	1	predicted	SMARCA1_+_128657241.23-P1P2	GCCCGGGCCGTCCACCTCTC	2	2	predicted	SMARCA1_-_128657372.23-P1P2|SMARCA1_+_128657241.23-P1P2
MED1	P1P2	essential	MED1_-_37607464.23-P1P2	GATCAATCTGAAGTCCCCGG	1	1	essential	MED1_+_37607273.23-P1P2	GCGAGGGTAAGTGACTGTAG	2	6	essential	MED1_-_37607464.23-P1P2|MED1_+_37607273.23-P1P2
C1orf162	P1P2	nonessential	C1orf162_-_112016636.23-P1P2	GGACTGCGTCGTGCTATGAC	1	1	predicted	C1orf162_-_112016587.23-P1P2	GTGAAACATAGAAGCCGTAA	2	2	predicted	C1orf162_-_112016636.23-P1P2|C1orf162_-_112016587.23-P1P2
EVL	P2	nonessential	EVL_-_100437897.23-P2	GAGTCCCCTCGGAGGGCGGT	1	1	predicted	EVL_-_100438154.23-P2	GgggcacgcgcccgccAAGA	2	2	predicted	EVL_-_100437897.23-P2|EVL_-_100438154.23-P2
KIAA2022	P1P2	nonessential	KIAA2022_+_74145063.23-P1P2	GCGCTAGGTAGCTCCAGCCG	1	1	predicted	KIAA2022_+_74145287.23-P1P2	GGCAGGGGAAGAACCTGGGA	2	2	predicted	KIAA2022_+_74145063.23-P1P2|KIAA2022_+_74145287.23-P1P2
KRTAP17-1	P1P2	nonessential	KRTAP17-1_+_39471938.23-P1P2	GCGTCAGTCGTGGGGAACTC	1	1	predicted	KRTAP17-1_-_39471908.23-P1P2	GCGGGCAGCACCCCATGGTC	2	2	predicted	KRTAP17-1_+_39471938.23-P1P2|KRTAP17-1_-_39471908.23-P1P2
TUBB4B	P1	nonessential	TUBB4B_-_140135818.23-P1	GGCCGCCGCCGCCATCATGA	1	1	predicted	TUBB4B_+_140135960.23-P1	Gcccggcggccgcaatgcgg	2	2	predicted	TUBB4B_-_140135818.23-P1|TUBB4B_+_140135960.23-P1
MYO6	P1P2	nonessential	MYO6_+_76459015.23-P1P2	GGCGGACGGGCACCAGGACA	1	1	predicted	MYO6_+_76459057.23-P1P2	GGCGCGGTGAGAAGTGATGA	2	2	predicted	MYO6_+_76459015.23-P1P2|MYO6_+_76459057.23-P1P2
PARP15	P1P2	nonessential	PARP15_-_122296517.23-P1P2	GAGTCCCAGCGAGCTGAGGA	1	1	predicted	PARP15_-_122296715.23-P1P2	GAGTATGGTGAGGAGCGCGG	2	2	predicted	PARP15_-_122296517.23-P1P2|PARP15_-_122296715.23-P1P2
STUB1	P1P2	significant	STUB1_-_730439.23-P1P2	GCCGGGCCCGAGCGGATCGC	1	1	empirical	STUB1_-_730848.23-P1P2	GGCCGGGTGCCGGAGAACGA	2	4	empirical	STUB1_-_730439.23-P1P2|STUB1_-_730848.23-P1P2
MEX3C	P1P2	nonessential	MEX3C_-_48723867.23-P1P2	Ggccgcccggagaccggaga	1	1	predicted	MEX3C_-_48723919.23-P1P2	Gggtaggtaactaggtgggt	2	2	predicted	MEX3C_-_48723867.23-P1P2|MEX3C_-_48723919.23-P1P2
PDZD2	P1P2	nonessential	PDZD2_-_31639276.23-P1P2	GTGCGCAGCGAGGCGAGGAG	1	1	predicted	PDZD2_-_31639289.23-P1P2	GGAGGAGCGGACCCCAGCGC	2	2	predicted	PDZD2_-_31639276.23-P1P2|PDZD2_-_31639289.23-P1P2
SOX8	P1P2	nonessential	SOX8_-_1032154.23-P1P2	GCCGTGTCGCAGGTGCTCAA	1	1	predicted	SOX8_+_1031821.23-P1P2	GACCCGAGGTCGCCGCGCGG	2	2	predicted	SOX8_-_1032154.23-P1P2|SOX8_+_1031821.23-P1P2
CSDE1	P1P2	significant	CSDE1_+_115300574.23-P1P2	GCGGGCCGTGCTGCTTATGG	1	3	empirical	CSDE1_-_115300604.23-P1P2	GGCAGCACGGCCCGGTACGT	2	4	empirical	CSDE1_+_115300574.23-P1P2|CSDE1_-_115300604.23-P1P2
PIK3CG	P1P2	nonessential	PIK3CG_-_106505799.23-P1P2	GATTTAGACGCACACTGGGT	1	1	predicted	PIK3CG_-_106505757.23-P1P2	GCTCTGCATCTGGATATGAA	2	2	predicted	PIK3CG_-_106505799.23-P1P2|PIK3CG_-_106505757.23-P1P2
PDAP1	P1P2	significant	PDAP1_-_99006167.23-P1P2	GCCCGCCCCTCACCTCCTTT	1	3	empirical	PDAP1_+_99006152.23-P1P2	GGCAATGCCTAAAGGAGGTG	2	4	empirical	PDAP1_-_99006167.23-P1P2|PDAP1_+_99006152.23-P1P2
ACBD4	P1	nonessential	ACBD4_-_43213072.23-P1	GTCAGTAGGAAGCCGCGGGG	1	1	predicted	ACBD4_-_43213050.23-P1	GCCGGCCCTGCTGGACCCCG	2	2	predicted	ACBD4_-_43213072.23-P1|ACBD4_-_43213050.23-P1
PSG9	P1P2	nonessential	PSG9_-_43773650.23-P1P2	GTCCAGAAGCTGTCTGAGCA	1	1	predicted	PSG9_+_43773630.23-P1P2	GGCCGTGCTCAGACAGCTTC	2	2	predicted	PSG9_-_43773650.23-P1P2|PSG9_+_43773630.23-P1P2
IRG1	P2	nonessential	IRG1_-_77526657.23-P2	GGCTTTGCCACAGCAATCCA	1	1	predicted	IRG1_+_77526642.23-P2	GTTCAAGCCATGGATTGCTG	2	2	predicted	IRG1_-_77526657.23-P2|IRG1_+_77526642.23-P2
BOP1	P1	significant	BOP1_+_145515084.23-P1	GGCCCGGTCGCTGTCGGAAG	1	2	empirical	BOP1_+_145515090.23-P1	GCACGCGGCCCGGTCGCTGT	2	4	empirical	BOP1_+_145515084.23-P1|BOP1_+_145515090.23-P1
ENOX1	P1P2	nonessential	ENOX1_-_44360828.23-P1P2	GGCGGAGGCAACCCGCTGCG	1	1	predicted	ENOX1_-_44360813.23-P1P2	GGCCGCCGTATGGGGAGCGG	2	2	predicted	ENOX1_-_44360828.23-P1P2|ENOX1_-_44360813.23-P1P2
TAS2R14	ENST00000537503.1	nonessential	TAS2R14_+_11091822.23-ENST00000537503.1	GGCAGTGATATTAGACATTG	1	1	predicted	TAS2R14_+_11091798.23-ENST00000537503.1	GTGCTCTTACAGGCAATGGG	2	2	predicted	TAS2R14_+_11091822.23-ENST00000537503.1|TAS2R14_+_11091798.23-ENST00000537503.1
TMEM214	P1P2	nonessential	TMEM214_-_27255873.23-P1P2	GGGAAGTGGCCGAGGAGGGA	1	1	predicted	TMEM214_-_27255853.23-P1P2	GGCGCCGGACCGGAAAGCCG	2	2	predicted	TMEM214_-_27255873.23-P1P2|TMEM214_-_27255853.23-P1P2
MRPS6	P1P2	significant	MRPS6_+_35445887.23-P1P2	GGCTGCGCCGGACGGCTCCC	1	3	empirical	MRPS6_+_35445873.23-P1P2	GCTCCCAGGCGGCGAAAGCA	2	5	empirical	MRPS6_+_35445887.23-P1P2|MRPS6_+_35445873.23-P1P2
TRABD	P1	significant	TRABD_+_50624389.23-P1	GGCGTACCGAGGCGAGGCAG	1	1	empirical	TRABD_+_50624348.23-P1	GATGCGGCGCGGGCCCTCAA	2	3	empirical	TRABD_+_50624389.23-P1|TRABD_+_50624348.23-P1
[truncated: 19,592 more rows]

## Sheet: library 3+4
gene	transcript	gene_source	sgID_A	protospacer_A	phenotype_A	predictedRank_A	source_A	sgID_B	protospacer_B	phenotype_B	predictedRank_B	source_B	sgID_AB
[truncated: 21,554 more rows]

## Sheet: library 5+6
gene	transcript	gene_source	sgID_A	protospacer_A	phenotype_A	predictedRank_A	source_A	sgID_B	protospacer_B	phenotype_B	predictedRank_B	source_B	sgID_AB
[truncated: 21,553 more rows]
