# Supplementary material for: Maximizing CRISPRi efficacy and accessibility with dual-sgRNA libraries and optimal effectors
Source: eLife. 2022 Dec 28;11:e81856. doi: 10.7554/eLife.81856 (PMC9829409; doi:10.7554/eLife.81856)
Supplement: Supplementary file 9. [file elife-81856-supp9.xlsx]

## Sheet: 1-2 library
gene	transcript	sgID_A	sgID_B	source_A	source_B	protospacer_A	protospacer_B	sgID_AB
ARID1A	P1P2	ARID1A_-_27022070.23-P1P2	ARID1A_+_27021963.23-P1P2	gamma	gamma	GCGGCGCTGCCTAGCGAAAG	GCCTCCCGGCGTCCCTATCC	ARID1A_-_27022070.23-P1P2|ARID1A_+_27021963.23-P1P2
ARRDC3	P1P2	ARRDC3_-_90679309.23-P1P2	ARRDC3_-_90679324.23-P1P2	gamma	gamma	GGTACAGTAGGTGTAGAGCT	GAGCTAGGGGAAGGAGATAC	ARRDC3_-_90679309.23-P1P2|ARRDC3_-_90679324.23-P1P2
BCL9L	P1P2	BCL9L_-_118796800.23-P1P2	BCL9L_+_118796753.23-P1P2	gamma	gamma	GCGCCCGGCCGGCTAGCGGG	GACCGAGTCAGACCACTGGG	BCL9L_-_118796800.23-P1P2|BCL9L_+_118796753.23-P1P2
BTG1	P1P2	BTG1_-_92539846.23-P1P2	BTG1_-_92539793.23-P1P2	gamma	gamma	GTAAACAAATAAACCCGGAG	GGGAGGCGGGTCCAGAGATA	BTG1_-_92539846.23-P1P2|BTG1_-_92539793.23-P1P2
BTG2	P1P2	BTG2_+_203274349.23-P1P2	BTG2_+_203274428.23-P1P2	gamma	gamma	GGACTGAGAGCTCTGAAAGG	GGCTCGCTGTCGTCAGTGCT	BTG2_+_203274349.23-P1P2|BTG2_+_203274428.23-P1P2
C3orf72	P1P2	C3orf72_+_138665948.23-P1P2	C3orf72_+_138665742.23-P1P2	gamma	gamma	GCGAGGCTCCTGGCGCACTA	Gcccgccggccgctccctag	C3orf72_+_138665948.23-P1P2|C3orf72_+_138665742.23-P1P2
CBFA2T3	P2	CBFA2T3_+_89043507.23-P2	CBFA2T3_+_89043595.23-P2	gamma	gamma	GCCGGCCCCGGCATTATCAC	GTCAAACCGGAATGGCCCGA	CBFA2T3_+_89043507.23-P2|CBFA2T3_+_89043595.23-P2
CBL	P1P2	CBL_+_119076986.23-P1P2	CBL_-_119076929.23-P1P2	gamma	gamma	GccgccgccgGCTATCCGGG	GgggctcgcgcgcTCTGAAG	CBL_+_119076986.23-P1P2|CBL_-_119076929.23-P1P2
CCNA2	P1P2	CCNA2_-_122745151.23-P1P2	CCNA2_-_122745162.23-P1P2	gamma	gamma	GAGGGTCGCAGGCGAGTGAA	GCGAGTGAAGGGTAAACCAA	CCNA2_-_122745151.23-P1P2|CCNA2_-_122745162.23-P1P2
CDKN1A	P1P2	CDKN1A_-_36646334.23-P1P2	CDKN1A_+_36646284.23-P1P2	gamma	gamma	GCGGCTGGCCTGCTGGAACT	GAACCTCGCGTGCTGCAGGA	CDKN1A_-_36646334.23-P1P2|CDKN1A_+_36646284.23-P1P2
CDKN1B	P1P2	CDKN1B_-_12870175.23-P1P2	CDKN1B_+_12870198.23-P1P2	gamma	gamma	GCGGCGCGCTCGGGAACGAG	GGGCGAGCGCGGCCTTAAGG	CDKN1B_-_12870175.23-P1P2|CDKN1B_+_12870198.23-P1P2
CDKN1C	P1P2	CDKN1C_+_2907157.23-P1P2	CDKN1C_-_2907196.23-P1P2	gamma	gamma	GGCCAATgggcggtgcgcgg	GTGGCCGCGCGCACACCCAC	CDKN1C_+_2907157.23-P1P2|CDKN1C_-_2907196.23-P1P2
CDKN2C	P1	CDKN2C_-_51435787.23-P1	CDKN2C_-_51435806.23-P1	gamma	gamma	GTCGTCAGAATTCTTCATAG	GGGGTTAAGCTAAAAAAGCG	CDKN2C_-_51435787.23-P1|CDKN2C_-_51435806.23-P1
CEBPA	P1P2	CEBPA_-_33793606.23-P1P2	CEBPA_+_33793488.23-P1P2	gamma	gamma	Ggcacagcgccgcgctcccc	GAGGCCGCCTCGGACTCTAG	CEBPA_-_33793606.23-P1P2|CEBPA_+_33793488.23-P1P2
CEBPB	P1P2	CEBPB_-_48807259.23-P1P2	CEBPB_+_48807232.23-P1P2	gamma	gamma	GTCCTCCCGGGGGTCTCGGG	GGAGACCCCCGGGAGGACGG	CEBPB_-_48807259.23-P1P2|CEBPB_+_48807232.23-P1P2
CEBPE	P1P2	CEBPE_+_23588548.23-P1P2	CEBPE_-_23589034.23-P1P2	gamma	gamma	GCCTCCCTGAGTCACCCCaa	GGGGTCTAGGGAGTAGTGAT	CEBPE_+_23588548.23-P1P2|CEBPE_-_23589034.23-P1P2
CERKL	P2	CERKL_+_182545421.23-P2	CERKL_+_182545389.23-P2	gamma	gamma	Ggggagcggttgtcggagga	Ggcaaggcgtggggagaagt	CERKL_+_182545421.23-P2|CERKL_+_182545389.23-P2
CITED1	P2	CITED1_+_71527155.23-P2	CITED1_-_71525874.23-P1	gamma	gamma	GGAGCCTTGGCCGGTCCACA	GGAGGTCGACTGGGCAGTAG	CITED1_+_71527155.23-P2|CITED1_-_71525874.23-P1
CNN1	P1	CNN1_-_11649536.23-P1	CNN1_-_11649313.23-P1	gamma	gamma	GGGCCTGACATCACAAGGGG	GGTGCTCACTAAACTACCTT	CNN1_-_11649536.23-P1|CNN1_-_11649313.23-P1
COL1A1	P1P2	COL1A1_+_48279053.23-P1P2	COL1A1_+_48279166.23-P1P2	gamma	gamma	GGCCGGCTCCCCCTCTCCGA	GCTGCGAAGAGGGGAGATGT	COL1A1_+_48279053.23-P1P2|COL1A1_+_48279166.23-P1P2
COL2A1	P1P2	COL2A1_-_48398527.23-P1P2	COL2A1_+_48398429.23-P1P2	gamma	gamma	GCCCCTGCCCCCCAAACCCG	GGAAGCGTGACTCCCAGAGA	COL2A1_-_48398527.23-P1P2|COL2A1_+_48398429.23-P1P2
DLX2	P1P2	DLX2_+_172967472.23-P1P2	DLX2_-_172967753.23-P1P2	gamma	gamma	GCGGGCCCAGAGGCCGAAAG	GGAACGCCCGGCCAAGGGGC	DLX2_+_172967472.23-P1P2|DLX2_-_172967753.23-P1P2
DUSP7	P1	DUSP7_-_52090661.23-P1	DUSP7_+_52090685.23-P1	gamma	gamma	GggccggcgcccgggcTTAA	GAGCGCGCCCGCATACCCCG	DUSP7_-_52090661.23-P1|DUSP7_+_52090685.23-P1
DUSP9	P1	DUSP9_+_152912544.23-P1	DUSP9_-_152912512.23-P1	gamma	gamma	GGGTGCTAGCCGAAGCAGTC	GCGACCCCGTCCCGCCTCGG	DUSP9_+_152912544.23-P1|DUSP9_-_152912512.23-P1
EEF1A1	P1P2	EEF1A1_+_74230870.23-P1P2	EEF1A1_-_74230942.23-P1P2	gamma	gamma	GGAGGGGTCGGCAATTGAAC	GGTGCGCTCTGCCCACTGAC	EEF1A1_+_74230870.23-P1P2|EEF1A1_-_74230942.23-P1P2
ELMSAN1	P1	ELMSAN1_+_74227127.23-P1	ELMSAN1_-_74227190.23-P1	gamma	gamma	GCGACTCGTGAGTGGAGGTG	GCCCAGGCTGGCGCCCCCGA	ELMSAN1_+_74227127.23-P1|ELMSAN1_-_74227190.23-P1
EP300	P1P2	EP300_-_41487423.23-P1P2	EP300_+_41487574.23-P1P2	gamma	gamma	GTCCCTTACGCAGAGACCAA	GTCCGCCCTAGGCCCCAACG	EP300_-_41487423.23-P1P2|EP300_+_41487574.23-P1P2
ETS2	P1P2	ETS2_+_40177593.23-P1P2	ETS2_+_40177680.23-P1P2	gamma	gamma	Gacgcacgaggggagagaag	Ggaagggaggtaggcaggat	ETS2_+_40177593.23-P1P2|ETS2_+_40177680.23-P1P2
FEV	P1P2	FEV_+_219850362.23-P1P2	FEV_+_219850399.23-P1P2	gamma	gamma	GAGTGAGCGGCGAGTGGAGC	GGAACCCGGGTGGGGATAGA	FEV_+_219850362.23-P1P2|FEV_+_219850399.23-P1P2
FOXA1	P1P2	FOXA1_+_38064620.23-P1P2	FOXA1_-_38064445.23-P1P2	gamma	gamma	GGTCGCGCGCAGCGGTGAAg	GGCCTCCGCGGGAAGTGAGC	FOXA1_+_38064620.23-P1P2|FOXA1_-_38064445.23-P1P2
FOXA3	P1P2	FOXA3_+_46367388.23-P1P2	FOXA3_+_46367396.23-P1P2	gamma	gamma	GGGGGGTGATTCAGGAGTGA	GCGACAGCTGGGGGTGATTC	FOXA3_+_46367388.23-P1P2|FOXA3_+_46367396.23-P1P2
FOXF1	P1P2	FOXF1_-_86544012.23-P1P2	FOXF1_+_86544016.23-P1P2	gamma	gamma	GgcggcTCGCTCGGGAGAAG	GGCTGCACCTCTGCCGTCAT	FOXF1_-_86544012.23-P1P2|FOXF1_+_86544016.23-P1P2
FOXL2	P1P2	FOXL2_+_138666025.23-P1P2	FOXL2_+_138666162.23-P1P2	gamma	gamma	GGCTGGCCGCCCCGCTATAG	GGAGTACCGGCAGATTTCAA	FOXL2_+_138666025.23-P1P2|FOXL2_+_138666162.23-P1P2
FOXO3	P1	FOXO3_-_108880780.23-P1	FOXO3_-_108882031.23-P2	gamma	gamma	GAGCCCAGCGGGGACAGCAG	GCCCGCCGCCTAGCCCGGGA	FOXO3_-_108880780.23-P1|FOXO3_-_108882031.23-P2
FOXO4	P1P2	FOXO4_-_70315822.23-P1P2	FOXO4_-_70315829.23-P1P2	gamma	gamma	GTTGATAGGGGAATCGGTGC	GGGGAATCGGTGCGGGAATA	FOXO4_-_70315822.23-P1P2|FOXO4_-_70315829.23-P1P2
GAB2	P1P2	GAB2_+_78129079.23-P1P2	GAB2_-_78129110.23-P1P2	gamma	gamma	GTGGCTTTCTGTATCCTCGC	GTACAGAAAGCCACCGCCGC	GAB2_+_78129079.23-P1P2|GAB2_-_78129110.23-P1P2
GATA1	P1P2	GATA1_-_48644622.23-P1P2	GATA1_+_48644829.23-P1P2	gamma	gamma	GCAGGAAGACGCACATACAC	GTGCTTGTGGGGCACCTCTT	GATA1_-_48644622.23-P1P2|GATA1_+_48644829.23-P1P2
GRB10	P1	GRB10_+_50861283.23-P1	GRB10_+_50861389.23-P1	gamma	gamma	Gggcggccgccgagcggtcc	GAGCCCGGGGCAGGAACCTC	GRB10_+_50861283.23-P1|GRB10_+_50861389.23-P1
HELZ2	P1	HELZ2_+_62205724.23-P1	HELZ2_+_62205706.23-P1	gamma	gamma	GGGCGCTGGCCCTTCAGGGA	GAGGGGCGTCCTCTGCTCGC	HELZ2_+_62205724.23-P1|HELZ2_+_62205706.23-P1
HK2	P1P2	HK2_+_75061095.23-P1P2	HK2_+_75061089.23-P1P2	gamma	gamma	GGGCGCGGCCGCTCAGACAC	GGCCGCTCAGACACCGGAGC	HK2_+_75061095.23-P1P2|HK2_+_75061089.23-P1P2
HNF4A	P1P2	HNF4A_-_43029394.23-P1P2	HNF4A_+_43029842.23-P1P2	gamma	gamma	GGGGAACCGGGAAACTGCGG	GCCTAGCCTCTGTGAAGGGG	HNF4A_-_43029394.23-P1P2|HNF4A_+_43029842.23-P1P2
HOXB9	P1P2	HOXB9_+_46704014.23-P1P2	HOXB9_+_46704211.23-P1P2	gamma	gamma	GACCGGGCGGCCGGTAGCTG	GGGCCTCTATGGCTTCTCCC	HOXB9_+_46704014.23-P1P2|HOXB9_+_46704211.23-P1P2
HOXC13	P1P2	HOXC13_-_54332569.23-P1P2	HOXC13_-_54332207.23-P1P2	gamma	gamma	Ggggaggtggaagcactagg	GACATCCTATGCCTAGGCGG	HOXC13_-_54332569.23-P1P2|HOXC13_-_54332207.23-P1P2
ID3	P1P2	ID3_-_23886120.23-P1P2	ID3_-_23886134.23-P1P2	gamma	gamma	GGCCCGCTTAAATTGCAAAC	GCAAACAGGCTTCCTCCGGC	ID3_-_23886120.23-P1P2|ID3_-_23886134.23-P1P2
IER5L	P1P2	IER5L_+_131940740.23-P1P2	IER5L_-_131940758.23-P1P2	gamma	gamma	GAGCCCCAGGAGAACATTCG	GCTGCCTCGAATGTTCTCCT	IER5L_+_131940740.23-P1P2|IER5L_-_131940758.23-P1P2
IGDCC3	P1P2	IGDCC3_-_65670472.23-P1P2	IGDCC3_-_65670504.23-P1P2	gamma	gamma	GtctccccGGAGGCCCGGTC	GAGCCGGCGAGCGCTTTAAG	IGDCC3_-_65670472.23-P1P2|IGDCC3_-_65670504.23-P1P2
IGF2BP1	P1P2	IGF2BP1_-_47074382.23-P1P2	IGF2BP1_-_47074600.23-P1P2	gamma	gamma	GGCTAGCAGTTAACCGGGGA	GCCGCCCCAGTTTACCCCGG	IGF2BP1_-_47074382.23-P1P2|IGF2BP1_-_47074600.23-P1P2
IGSF1	P1P2	IGSF1_+_130423378.23-P1P2	IGSF1_+_130423374.23-P1P2	gamma	gamma	GTGCCAGGCAGAGTTGGTGT	GAGGCAGAGTTGGTGTAGGT	IGSF1_+_130423378.23-P1P2|IGSF1_+_130423374.23-P1P2
IKZF3	P1P2	IKZF3_-_38020553.23-P1P2	IKZF3_-_38020571.23-P1P2	gamma	gamma	GGCAGGAGCCGGCGACCTGC	GCCGGTGCGCGGGGTTACAG	IKZF3_-_38020553.23-P1P2|IKZF3_-_38020571.23-P1P2
INTS8	P1P2	INTS8_-_95835396.23-P1P2	INTS8_-_95835155.23-P1P2	gamma	gamma	GTCCTATGGCAACCGGGAGG	GAGGACGGCGGGAGCATCTG	INTS8_-_95835396.23-P1P2|INTS8_-_95835155.23-P1P2
IRF1	P1P2	IRF1_-_131826630.23-P1P2	IRF1_-_131826633.23-P1P2	gamma	gamma	GGCGGCGAAGGGGAAGTACA	GGCGAAGGGGAAGTACAGGG	IRF1_-_131826630.23-P1P2|IRF1_-_131826633.23-P1P2
ISL2	P1P2	ISL2_+_76629003.23-P1P2	ISL2_+_76628994.23-P1P2	gamma	gamma	GAGCTTCCCCAGAACTGCCG	GAGAACTGCCGGGGATGCGG	ISL2_+_76629003.23-P1P2|ISL2_+_76628994.23-P1P2
JUN	P1P2	JUN_+_59249990.23-P1P2	JUN_+_59249919.23-P1P2	gamma	gamma	GGGGAAAAACGGCCCgggga	GgaaagaagggCCCGACTGT	JUN_+_59249990.23-P1P2|JUN_+_59249919.23-P1P2
KIAA0754	P1P2	KIAA0754_+_39874561.23-P1P2	KIAA0754_-_39874597.23-P1P2	gamma	gamma	GACTCCGAGAGTGGAGGGAG	GTCGGAGTCGCTCCTCTccc	KIAA0754_+_39874561.23-P1P2|KIAA0754_-_39874597.23-P1P2
KIF2C	P1P2	KIF2C_-_45205407.23-P1P2	KIF2C_+_45205311.23-P1P2	gamma	gamma	GCAAGCGTAGGAAGATGGTT	GCGCCGCTACGTGGGGTCTG	KIF2C_-_45205407.23-P1P2|KIF2C_+_45205311.23-P1P2
KLF1	P1P2	KLF1_-_12998122.23-P1P2	KLF1_+_12998511.23-P1P2	gamma	gamma	GCGGGGGGGCACTGTTTCTG	GTCCCAGCCCTCCCCTTCAC	KLF1_-_12998122.23-P1P2|KLF1_+_12998511.23-P1P2
KLF16	P1P2	KLF16_+_1863760.23-P1P2	KLF16_+_1863708.23-P1P2	gamma	gamma	Ggcggctcggagagtggtgg	Gccccgagggggcgtcctcc	KLF16_+_1863760.23-P1P2|KLF16_+_1863708.23-P1P2
KLF3	P1P2	KLF3_-_38665689.23-P1P2	KLF3_-_38665692.23-P1P2	gamma	gamma	GGTGACTCGGCCGACCCCTC	GACTCGGCCGACCCCTCCGG	KLF3_-_38665689.23-P1P2|KLF3_-_38665692.23-P1P2
KLF5	P1P2	KLF5_+_73632847.23-P1P2	KLF5_-_73632967.23-P1P2	gamma	gamma	GAGCGGAGCGGGTGGAATCT	GGAAGCTCGTGGCCCGAGAG	KLF5_+_73632847.23-P1P2|KLF5_-_73632967.23-P1P2
KMT2A	P1P2	KMT2A_+_118306897.23-P1P2	KMT2A_+_118306901.23-P1P2	gamma	gamma	GGCATTGCTCGGGAAAAGGA	GAGAGGCATTGCTCGGGAAA	KMT2A_+_118306897.23-P1P2|KMT2A_+_118306901.23-P1P2
LHX4	P1P2	LHX4_+_180199306.23-P1P2	LHX4_-_180199180.23-P1P2	gamma	gamma	GCGGGAGGCCGCGGTCACCC	GgccccgccGGCCTCACTCG	LHX4_+_180199306.23-P1P2|LHX4_-_180199180.23-P1P2
LOXL4	P1P2	LOXL4_+_100028016.23-P1P2	LOXL4_-_100028112.23-P1P2	gamma	gamma	Ggcctgcggggcctcctccg	Ggcgccccccgtcgggacac	LOXL4_+_100028016.23-P1P2|LOXL4_-_100028112.23-P1P2
LPAR5	P1	LPAR5_+_6745299.23-P1	LPAR5_+_6745237.23-P1	gamma	gamma	GGCTGCTGGGGTTTCTTCTC	GCTCTCTCCTTGGCCCGTGT	LPAR5_+_6745299.23-P1|LPAR5_+_6745237.23-P1
LTA	P1P2	LTA_-_31539826.23-P1P2	LTA_+_31539836.23-P1P2	gamma	gamma	GTAGGCCTGACCCCACTCCC	GGTCGGGTCAGGGGAATCGT	LTA_-_31539826.23-P1P2|LTA_+_31539836.23-P1P2
LYL1	P1P2	LYL1_-_13213857.23-P1P2	LYL1_+_13213801.23-P1P2	gamma	gamma	GTAGGGACCCCGGGCCTCTG	GAGCGGAAGGCGAAGCCCTG	LYL1_-_13213857.23-P1P2|LYL1_+_13213801.23-P1P2
MAML2	P1P2	MAML2_+_96076551.23-P1P2	MAML2_-_96076442.23-P1P2	gamma	gamma	GAGGGCAGCTGAGATGCGCA	GGGGCGGGAGAGCTCGTTCG	MAML2_+_96076551.23-P1P2|MAML2_-_96076442.23-P1P2
MAML3	P1P2	MAML3_-_141075375.23-P1P2	MAML3_-_141075588.23-P1P2	gamma	gamma	GAGCTCAGTAAACACGGCAG	GAGAGAAGAAAGATTCTGGG	MAML3_-_141075375.23-P1P2|MAML3_-_141075588.23-P1P2
MAP2K3	P1P2	MAP2K3_-_21187855.23-P1P2	MAP2K3_-_21187828.23-P1P2	gamma	gamma	GGGACTTGACAGAGAGCGGG	GCGGACCTGGGTTTTTCGGG	MAP2K3_-_21187855.23-P1P2|MAP2K3_-_21187828.23-P1P2
MAP4K3	P1P2	MAP4K3_+_39664382.23-P1P2	MAP4K3_+_39664443.23-P1P2	gamma	gamma	GCCCGAGCGAGGGGCTGCGA	GAGGAGCCGGAGTAAGGGGA	MAP4K3_+_39664382.23-P1P2|MAP4K3_+_39664443.23-P1P2
MAP4K5	P1P2	MAP4K5_+_50999358.23-P1P2	MAP4K5_+_50999470.23-P1P2	gamma	gamma	GGCTGGGCGCCGACCCATGC	GGCAAGGACGCGCCCGGCTA	MAP4K5_+_50999358.23-P1P2|MAP4K5_+_50999470.23-P1P2
MEIS1	P1P2	MEIS1_+_66662138.23-P1P2	MEIS1_+_66662167.23-P1P2	gamma	gamma	GAAGCGAGCTCTGGCCGCAC	GGTAGGCTCCTCGGCAGGGG	MEIS1_+_66662138.23-P1P2|MEIS1_+_66662167.23-P1P2
MEIS2	P1P2	MEIS2_-_37392689.23-P1P2	MEIS2_+_37392826.23-P1P2	gamma	gamma	GTACGGCGGAGACACATCCC	GGCAGGCTTGCTGATTTGCT	MEIS2_-_37392689.23-P1P2|MEIS2_+_37392826.23-P1P2
MEX3B	P1	MEX3B_+_82338496.23-P1	MEX3B_+_82338469.23-P1	gamma	gamma	GGTCCCCCTCCGGAGTCGTC	GGAGGCTCAGTCAAgaggcg	MEX3B_+_82338496.23-P1|MEX3B_+_82338469.23-P1
MIDN	P2	MIDN_-_1248439.23-P2	MIDN_+_1248431.23-P2	gamma	gamma	GCCGGGTGGCCCAGCCGTCA	GTGGCCCTGGGGCGCCTTGA	MIDN_-_1248439.23-P2|MIDN_+_1248431.23-P2
MYOD1	P1P2	MYOD1_+_17740970.23-P1P2	MYOD1_-_17740945.23-P1P2	gamma	gamma	GGTCCCCGGGGTGGCCGCAG	GCGCGCACGCCAGTGTGGAG	MYOD1_+_17740970.23-P1P2|MYOD1_-_17740945.23-P1P2
NEUROD1	P1P2	NEUROD1_+_182545421.23-P1P2	NEUROD1_+_182545389.23-P1P2	gamma	gamma	Ggggagcggttgtcggagga	Ggcaaggcgtggggagaagt	NEUROD1_+_182545421.23-P1P2|NEUROD1_+_182545389.23-P1P2
NEUROG2	P1P2	NEUROG2_+_113437508.23-P1P2	NEUROG2_+_113437541.23-P1P2	gamma	gamma	Gggaaaggcggtgaagaaag	Gaggaggaggatggatggca	NEUROG2_+_113437508.23-P1P2|NEUROG2_+_113437541.23-P1P2
NPM1	P1P2	NPM1_-_170814687.23-P1P2	NPM1_-_170814694.23-P1P2	gamma	gamma	GTGGGAGCCCGCGGAGTACC	GCCGCGGAGTACCTGGAAGG	NPM1_-_170814687.23-P1P2|NPM1_-_170814694.23-P1P2
OTOP2	P1P2	OTOP2_+_72920307.23-P1P2	OTOP2_-_72920183.23-P1P2	gamma	gamma	GACAGGGTGATTTACAGCTG	GCGCACCGGGGTGACGGAGT	OTOP2_+_72920307.23-P1P2|OTOP2_-_72920183.23-P1P2
PITX1	P1P2	PITX1_+_134370042.23-P1P2	PITX1_-_134370243.23-P1P2	gamma	gamma	Gcggcggcgcgggcggcttg	GCATCTGGCCTGCGAGTCCC	PITX1_+_134370042.23-P1P2|PITX1_-_134370243.23-P1P2
PLK4	P1P2	PLK4_+_128801952.23-P1P2	PLK4_-_128801970.23-P1P2	gamma	gamma	GGGCCCAGGGTTCTAGACTT	GGCCCCGAAGTCTAGAACCC	PLK4_+_128801952.23-P1P2|PLK4_-_128801970.23-P1P2
POU3F2	P1P2	POU3F2_-_99282185.23-P1P2	POU3F2_-_99282242.23-P1P2	gamma	gamma	GGGGCCCATCCGAGAGAGGG	GGAACTGAGAGAATCTGAAT	POU3F2_-_99282185.23-P1P2|POU3F2_-_99282242.23-P1P2
PPP2R5D	P1P2	PPP2R5D_-_42952048.23-P1P2	PPP2R5D_-_42952164.23-P1P2	gamma	gamma	GGCCGACGCACAGCAGACGC	GAATTCTGGAAGCCGAACCC	PPP2R5D_-_42952048.23-P1P2|PPP2R5D_-_42952164.23-P1P2
PRDM1	P1P2	PRDM1_-_106534101.23-P1P2	PRDM1_-_106534191.23-P1P2	gamma	gamma	GCGGCTGTGCTAGCAATCTG	GGCTAAGGAAATCTTAAGCA	PRDM1_-_106534101.23-P1P2|PRDM1_-_106534191.23-P1P2
PRTG	P1P2	PRTG_+_56035406.23-P1P2	PRTG_-_56035634.23-P1P2	gamma	gamma	GAGATGTAGAAAGTAGTCCC	GGTCGGGGACAGAGCCACAA	PRTG_+_56035406.23-P1P2|PRTG_-_56035634.23-P1P2
PTPN9	P1P2	PTPN9_-_75871907.23-P1P2	PTPN9_+_75871737.23-P1P2	gamma	gamma	GggaggggACCCTAGCTGGA	GTTCTCAATGGAgccgcggg	PTPN9_-_75871907.23-P1P2|PTPN9_+_75871737.23-P1P2
RASA2	P1P2	RASA2_-_141205741.23-P1P2	RASA2_-_141205762.23-P1P2	gamma	gamma	GCCCGGCTCGGGGGTGGCGA	GGCGGTGAATGGAGACCcgg	RASA2_-_141205741.23-P1P2|RASA2_-_141205762.23-P1P2
RASA3	P1P2	RASA3_-_114898176.23-P1P2	RASA3_-_114898219.23-P1P2	gamma	gamma	GAACTGGCCCGGGCCCTGCA	GCTGGCGGGTGGCGGAGACC	RASA3_-_114898176.23-P1P2|RASA3_-_114898219.23-P1P2
RBPMS2	P1P2	RBPMS2_+_65067757.23-P1P2	RBPMS2_+_65068015.23-P1P2	gamma	gamma	GGGTCGCAGTGAAAAGGCGG	GTGACCCAGGCGAGAGAGAG	RBPMS2_+_65067757.23-P1P2|RBPMS2_+_65068015.23-P1P2
RCOR1	P1P2	RCOR1_-_103058686.23-P1P2	RCOR1_-_103058693.23-P1P2	gamma	gamma	GGCCTGGAGAGATGGATCAT	GGAGATGGATCATGGGGCGT	RCOR1_-_103058686.23-P1P2|RCOR1_-_103058693.23-P1P2
RHOXF2	ENST00000371388.3	RHOXF2_+_119292319.23-ENST00000371388.3	RHOXF2_+_119292364.23-ENST00000371388.3	gamma	gamma	Ggtgggagggggagtaggat	Gaggggtaagtggtgtagta	RHOXF2_+_119292319.23-ENST00000371388.3|RHOXF2_+_119292364.23-ENST00000371388.3
RHOXF2B	ENST00000371402.2	RHOXF2B_-_119211853.23-ENST00000371402.2	RHOXF2B_-_119211808.23-ENST00000371402.2	gamma	gamma	Ggtgggagggggagtaggat	Gaggggtaagtggtgtagta	RHOXF2B_-_119211853.23-ENST00000371402.2|RHOXF2B_-_119211808.23-ENST00000371402.2
RREB1	P1P2	RREB1_-_7107768.23-P1P2	RREB1_+_7107827.23-P1P2	gamma	gamma	GGGCCCGGGGCGCCTTGGGA	GTGACCGCAGTTGCCATCCC	RREB1_-_7107768.23-P1P2|RREB1_+_7107827.23-P1P2
SAMD1	P1P2	SAMD1_+_14201819.23-P1P2	SAMD1_+_14201742.23-P1P2	gamma	gamma	GccgccccGGGCCAACTCCG	GGAGCGAGAGCGCAGGGTAA	SAMD1_+_14201819.23-P1P2|SAMD1_+_14201742.23-P1P2
SAMD4B	P1P2	SAMD4B_+_39832885.23-P1P2	SAMD4B_+_39832925.23-P1P2	gamma	gamma	GGGAGCGACGGTGGTGGAAC	GGGGAGGTGTGAGCCGAGTA	SAMD4B_+_39832885.23-P1P2|SAMD4B_+_39832925.23-P1P2
SGK1	P1	SGK1_-_134496175.23-P1	SGK1_+_134496163.23-P1	gamma	gamma	GGGTTCTGTCCCCATTGAGA	GCGGGGCTCGCCCTCTCAAT	SGK1_-_134496175.23-P1|SGK1_+_134496163.23-P1
SLC38A3	P1P2	SLC38A3_+_50242562.23-P1P2	SLC38A3_+_50242544.23-P1P2	gamma	gamma	GGGGGCAGGCCGGGAGCAAA	GAGGGGCGGCCTGAGCGTTA	SLC38A3_+_50242562.23-P1P2|SLC38A3_+_50242544.23-P1P2
SLC4A1	P1P2	SLC4A1_+_42345729.23-P1P2	SLC4A1_+_42345604.23-P1P2	gamma	gamma	GGAAGAGTCAGGAGAACCAT	GCACCCAGTGGGAGCGGGGT	SLC4A1_+_42345729.23-P1P2|SLC4A1_+_42345604.23-P1P2
SLC6A14	P1P2	SLC6A14_-_115567653.23-P1P2	SLC6A14_-_115567664.23-P1P2	gamma	gamma	GGCAGGAGATTGCTACATGT	GCTACATGTAGGCTTATCTG	SLC6A14_-_115567653.23-P1P2|SLC6A14_-_115567664.23-P1P2
SLC7A1	P1P2	SLC7A1_+_30170062.23-P1P2	SLC7A1_+_30170025.23-P1P2	gamma	gamma	GCTACTGAGAAGGCGAGCGG	GCGCCGCGGGAACCCCAGGT	SLC7A1_+_30170062.23-P1P2|SLC7A1_+_30170025.23-P1P2
SLC7A2	P1P2	SLC7A2_-_17354578.23-P1P2	SLC7A2_+_17354309.23-P1P2	gamma	gamma	GcccgggTGGCTACACAGAG	GATAAACTTCGTGCTCTCCT	SLC7A2_-_17354578.23-P1P2|SLC7A2_+_17354309.23-P1P2
SLC7A3	P1P2	SLC7A3_+_70151123.23-P1P2	SLC7A3_+_70151136.23-P1P2	gamma	gamma	GGAGGATGGGACGCAGTCTC	GCAGGCTTGCTAGTGAGGAT	SLC7A3_+_70151123.23-P1P2|SLC7A3_+_70151136.23-P1P2
SLC7A6	P1P2	SLC7A6_+_68298278.23-P1P2	SLC7A6_+_68298123.23-P1P2	gamma	gamma	GTGGCCGGTACGGGGTCCGC	GTCCCGCGGGGAGCTCTCAT	SLC7A6_+_68298278.23-P1P2|SLC7A6_+_68298123.23-P1P2
SNAI1	P1P2	SNAI1_+_48599323.23-P1P2	SNAI1_+_48599272.23-P1P2	gamma	gamma	GCGCGTGGCGGTGAGAGCCC	GGCGCAGCGCGGGTCGTCCC	SNAI1_+_48599323.23-P1P2|SNAI1_+_48599272.23-P1P2
SOS1	P1P2	SOS1_-_39348326.23-P1P2	SOS1_+_39348297.23-P1P2	gamma	gamma	GGCTGTGGCTGCGCTCCTGG	GAGCGCAGCCACAGCCCGGC	SOS1_-_39348326.23-P1P2|SOS1_+_39348297.23-P1P2
SOX1	P1P2	SOX1_+_112721119.23-P1P2	SOX1_-_112721217.23-P1P2	gamma	gamma	GGCGCGCTGGCGAGTGACGT	GGCAGCCCGGGCCCGGCGTA	SOX1_+_112721119.23-P1P2|SOX1_-_112721217.23-P1P2
SPI1	P1P2	SPI1_-_47400134.23-P1P2	SPI1_+_47400407.23-P1P2	gamma	gamma	GGCTGGGAGATAGTCCCCTT	GACCCCAATGAGGTGACTGT	SPI1_-_47400134.23-P1P2|SPI1_+_47400407.23-P1P2
TBX3	P1P2	TBX3_+_115122163.23-P1P2	TBX3_-_115122232.23-P1P2	gamma	gamma	GACAGGCAGTAGTACCGATG	GGGGCGGGCGGGAGCCACTG	TBX3_+_115122163.23-P1P2|TBX3_-_115122232.23-P1P2
TGFBR2	P1P2	TGFBR2_-_30648014.23-P1P2	TGFBR2_-_30648000.23-P1P2	gamma	gamma	GGGAGAGGGAGAAGGCTCTC	GGGGCTGGACGTCGAGGAGA	TGFBR2_-_30648014.23-P1P2|TGFBR2_-_30648000.23-P1P2
TIPARP	P1P2	TIPARP_+_156392271.23-P1P2	TIPARP_+_156392295.23-P1P2	gamma	gamma	GAGGAGGCCGGGCGCTCAGT	GGCCGGAGTTCGGTGGGGTG	TIPARP_+_156392271.23-P1P2|TIPARP_+_156392295.23-P1P2
TP73	P1P2	TP73_-_3568962.23-P1P2	TP73_-_3568919.23-P1P2	gamma	gamma	GTGGCCCCGCCGCGACTCGG	GTGGACGCGGCCAGCTGGAG	TP73_-_3568962.23-P1P2|TP73_-_3568919.23-P1P2
TSC22D1	P1P2	TSC22D1_-_45011201.23-P1P2	TSC22D1_-_45011194.23-P1P2	gamma	gamma	GGCCGTGCTCAGAGGGAGTG	GGGCGCGGGCCGTGCTCAGA	TSC22D1_-_45011201.23-P1P2|TSC22D1_-_45011194.23-P1P2
TTC6	P1	TTC6_+_38064620.23-P1	TTC6_+_38064428.23-P1	gamma	gamma	GGTCGCGCGCAGCGGTGAAg	GGCAGCCCGCTCACTTCCCG	TTC6_+_38064620.23-P1|TTC6_+_38064428.23-P1
UBASH3A	P1P2	UBASH3A_-_43823805.23-P1P2	UBASH3A_+_43823778.23-P1P2	gamma	gamma	GAGAGGCTGATCCCGTGCAG	GCACGGGATCAGCCTCTGTA	UBASH3A_-_43823805.23-P1P2|UBASH3A_+_43823778.23-P1P2
WT1	P1P2	WT1_+_32457273.23-P1P2	WT1_+_32457277.23-P1P2	gamma	gamma	GCGTGTTGGGTTGAAGAGGA	GAGCGCGTGTTGGGTTGAAG	WT1_+_32457273.23-P1P2|WT1_+_32457277.23-P1P2
YAP1	P1P2	YAP1_-_101981016.23-P1P2	YAP1_-_101980992.23-P1P2	gamma	gamma	GCCGCGGGCCGGGAGTGTGC	GGGTCACGTGCGGCCGGGAG	YAP1_-_101981016.23-P1P2|YAP1_-_101980992.23-P1P2
ZBTB10	P1P2	ZBTB10_+_81398318.23-P1P2	ZBTB10_+_81398398.23-P1P2	gamma	gamma	Ggcgccaggggaccgggaaa	GTAACCgctggagggggaaa	ZBTB10_+_81398318.23-P1P2|ZBTB10_+_81398398.23-P1P2
ZBTB25	P1P2	ZBTB25_+_64971511.23-P1P2	ZBTB25_-_64971449.23-P1P2	gamma	gamma	GGGGCTGCGCGGAGAGGCTC	GAAGCGGGGCCGGCTCAGTG	ZBTB25_+_64971511.23-P1P2|ZBTB25_-_64971449.23-P1P2
ZEB2	P1	ZEB2_+_145277796.23-P1	ZEB2_+_145277717.23-P1	gamma	gamma	GATAGGTGGCGCGTGTTTCA	GAACACGTCAGTCCGTCCCC	ZEB2_+_145277796.23-P1|ZEB2_+_145277717.23-P1
ZMYM2	P1P2	ZMYM2_-_20532736.23-P1P2	ZMYM2_+_20532721.23-P1P2	gamma	gamma	GGGACCACCCTACCGAGGGG	GTCAGGGCCCCCCCTCGGTA	ZMYM2_-_20532736.23-P1P2|ZMYM2_+_20532721.23-P1P2
ZNF148	P1P2	ZNF148_-_125094253.23-P1P2	ZNF148_-_125094302.23-P1P2	gamma	gamma	GGCACACGGGAAGCGCTCCG	GTGGCTGGAAAGACACAGCG	ZNF148_-_125094253.23-P1P2|ZNF148_-_125094302.23-P1P2
ZNF281	P1P2	ZNF281_-_200379219.23-P1P2	ZNF281_-_200379375.23-P1P2	gamma	gamma	GTCGACCCGGCCAGAGGGGA	GGCGAACAGGCGTGATTGGT	ZNF281_-_200379219.23-P1P2|ZNF281_-_200379375.23-P1P2
ZNF296	P1P2	ZNF296_-_45579834.23-P1P2	ZNF296_-_45579846.23-P1P2	gamma	gamma	GGGACCGAGCCGCCCTGCTG	GCCTGCTGGGGCCCTGACGG	ZNF296_-_45579834.23-P1P2|ZNF296_-_45579846.23-P1P2
ZNF362	P1P2	ZNF362_+_33721872.23-P1P2	ZNF362_-_33721957.23-P1P2	gamma	gamma	Ggcgactgcgcgagagggga	Gacgggctgcgcagccggag	ZNF362_+_33721872.23-P1P2|ZNF362_-_33721957.23-P1P2
A1BG	P1	A1BG_-_58859113.23-P1	A1BG_+_58859204.23-P1	predicted	predicted	Gcgcgcctgcgcctcagccc	GGTGCGGGGACACTCACGTG	A1BG_-_58859113.23-P1|A1BG_+_58859204.23-P1
A1BG	P2	A1BG_-_58864955.23-P2	A1BG_-_58864975.23-P2	predicted	predicted	GCAGGGCCCCCATGGGGTCA	GGGCAAAGGGTGAACTTCTG	A1BG_-_58864955.23-P2|A1BG_-_58864975.23-P2
A1CF	P1P2	A1CF_-_52645539.23-P1P2	A1CF_+_52645527.23-P1P2	predicted	predicted	GGCCCTTTGACCAGATAATT	GCTGTAGTGACCCAATTATC	A1CF_-_52645539.23-P1P2|A1CF_+_52645527.23-P1P2
A2M	P1P2	A2M_-_9268635.23-P1P2	A2M_+_9268702.23-P1P2	predicted	predicted	GTCTCTGGAAAGGTCATTGA	GAGTGAGCTCTTACGGGAAT	A2M_-_9268635.23-P1P2|A2M_+_9268702.23-P1P2
A2ML1	P1P2	A2ML1_+_8975008.23-P1P2	A2ML1_-_8975016.23-P1P2	predicted	predicted	GCTGCCTGGAACATCCATAC	GAAAACTGGCTGAACCAGTA	A2ML1_+_8975008.23-P1P2|A2ML1_-_8975016.23-P1P2
A3GALT2	ENST00000442999.3	A3GALT2_-_33786863.23-ENST00000442999.3	A3GALT2_-_33786967.23-ENST00000442999.3	predicted	predicted	GTGCCTGCGAGGGACCTGCC	GGGTCTGAGTAGGCCAGTTC	A3GALT2_-_33786863.23-ENST00000442999.3|A3GALT2_-_33786967.23-ENST00000442999.3
A4GALT	P1P2	A4GALT_+_43117014.23-P1P2	A4GALT_+_43116948.23-P1P2	predicted	predicted	GCCGCCCCGGGGAGCAGCGA	GGGGACCCGCAGGGTAGGTC	A4GALT_+_43117014.23-P1P2|A4GALT_+_43116948.23-P1P2
A4GNT	P1P2	A4GNT_-_137851386.23-P1P2	A4GNT_+_137851432.23-P1P2	predicted	predicted	GCTCCCAAACACAGCCACTT	GAATAGATCCACAAACAGGC	A4GNT_-_137851386.23-P1P2|A4GNT_+_137851432.23-P1P2
AAAS	P1P2	AAAS_+_53715502.23-P1P2	AAAS_-_53715519.23-P1P2	predicted	predicted	GGTAACCAACGGTTGGCCGG	GACGTCCCCCGGCCAACCGT	AAAS_+_53715502.23-P1P2|AAAS_-_53715519.23-P1P2
AACS	P1P2	AACS_+_125549846.23-P1P2	AACS_-_125549882.23-P1P2	predicted	predicted	GTGAGTGCAGCGCCGCTCAA	GGCACTCAGCGGAGGGTTAC	AACS_+_125549846.23-P1P2|AACS_-_125549882.23-P1P2
AADAC	P1P2	AADAC_+_151531719.23-P1P2	AADAC_+_151531810.23-P1P2	predicted	predicted	GAATGAGTAATAGGAAACTA	GAGTTGCTCACTTAGTTTAA	AADAC_+_151531719.23-P1P2|AADAC_+_151531810.23-P1P2
AADACL2	P1P2	AADACL2_-_151451555.23-P1P2	AADACL2_-_151451238.23-P1P2	predicted	predicted	GGGGCTGATGATGGTATCAC	GAGCTTCCAGGCTTAGTCTA	AADACL2_-_151451555.23-P1P2|AADACL2_-_151451238.23-P1P2
AADACL3	P1P2	AADACL3_-_12775965.23-P1P2	AADACL3_+_12775953.23-P1P2	predicted	predicted	GTGGCTGGATCCGGCTGGAT	GAGAAAGTGGCCCATCCAGC	AADACL3_-_12775965.23-P1P2|AADACL3_+_12775953.23-P1P2
AADACL4	P1P2	AADACL4_+_12704411.23-P1P2	AADACL4_-_12704368.23-P1P2	predicted	predicted	GTGGCCTGACACAGCTTCTC	GCTGGGTCCCCACATTGCTT	AADACL4_+_12704411.23-P1P2|AADACL4_-_12704368.23-P1P2
AADAT	P1P2	AADAT_+_171011478.23-P1P2	AADAT_-_171011381.23-P1P2	predicted	predicted	GAGCGCGCGGGAACGAGGGT	GAGCCCAGGGGCTGACCGAG	AADAT_+_171011478.23-P1P2|AADAT_-_171011381.23-P1P2
AAED1	P1P2	AAED1_-_99417790.23-P1P2	AAED1_-_99417759.23-P1P2	predicted	predicted	GAGAAAGTAAGGTCCGTCCA	GTGACTCAGCTCTCAGGGTA	AAED1_-_99417790.23-P1P2|AAED1_-_99417759.23-P1P2
AAGAB	P1P2	AAGAB_-_67547158.23-P1P2	AAGAB_+_67547183.23-P1P2	predicted	predicted	GCGCGCGCGGTGTTGCCATG	GGAGGCGCGGTTTCCAAGCA	AAGAB_-_67547158.23-P1P2|AAGAB_+_67547183.23-P1P2
AAK1	P1P2	AAK1_+_69870940.23-P1P2	AAK1_-_69870926.23-P1P2	predicted	predicted	GCCGCCCCGAGGGGCACTTC	GcggcTCCATCCACCCAACC	AAK1_+_69870940.23-P1P2|AAK1_-_69870926.23-P1P2
AAMDC	P1P2	AAMDC_+_77532017.23-P1P2	AAMDC_+_77531976.23-P1P2	predicted	predicted	GGAGGCAGTGGCAAGCCCGA	GAAAGAGGGCGGAAAGTGAA	AAMDC_+_77532017.23-P1P2|AAMDC_+_77531976.23-P1P2
AAMP	P1P2	AAMP_-_219135111.23-P1P2	AAMP_-_219135011.23-P1P2	predicted	predicted	GCGCGCCTCCGGGGTCTCCT	GACAGAGCGGCATTGGAAGA	AAMP_-_219135111.23-P1P2|AAMP_-_219135011.23-P1P2
AANAT	P1P2	AANAT_+_74463519.23-P1P2	AANAT_+_74463549.23-P1P2	predicted	predicted	GGCACAGAAGGGATTACCAG	GTGAAGGGAAACGTCAGCTC	AANAT_+_74463519.23-P1P2|AANAT_+_74463549.23-P1P2
AAR2	P1P2	AAR2_+_34824317.23-P1P2	AAR2_-_34824434.23-P1P2	predicted	predicted	GCGGCAGAGCCCTGGGTCGC	GTGGGGCGAGGCGGTGAGTG	AAR2_+_34824317.23-P1P2|AAR2_-_34824434.23-P1P2
AARD	P1P2	AARD_-_117950317.23-P1P2	AARD_+_117950380.23-P1P2	predicted	predicted	GGCTAATGGAGGACTAAGAT	GCGGGGGCGGAGGTAATTCA	AARD_-_117950317.23-P1P2|AARD_+_117950380.23-P1P2
AARS	P1P2	AARS_-_70323586.23-P1P2	AARS_+_70323546.23-P1P2	predicted	predicted	GTGGGAAGGCGGCTCTAACT	GCCAGGAATCCACTAATGAA	AARS_-_70323586.23-P1P2|AARS_+_70323546.23-P1P2
AARS2	P1P2	AARS2_-_44281194.23-P1P2	AARS2_-_44281158.23-P1P2	predicted	predicted	GGGGGTGGAAGCGATCGATT	GGGCGGTAGGAGGACTCAGG	AARS2_-_44281194.23-P1P2|AARS2_-_44281158.23-P1P2
AARSD1	P1	AARSD1_-_41116521.23-P1	AARSD1_-_41116569.23-P1	predicted	predicted	GAGCGAACGGAGAGCGACGT	GGCGCAGAAGCAGGAGGGTA	AARSD1_-_41116521.23-P1|AARSD1_-_41116569.23-P1
AARSD1	P2	AARSD1_+_41132335.23-P2	AARSD1_-_41132355.23-P2	predicted	predicted	GtccctgtgtgtagcGTCTA	GGCCCTAGACgctacacaca	AARSD1_+_41132335.23-P2|AARSD1_-_41132355.23-P2
AASDH	P1P2	AASDH_-_57253705.23-P1P2	AASDH_+_57253725.23-P1P2	predicted	predicted	GAGTGCGAGCGACCCCGGGC	GAGCGCCTCGGCTTCAGGAG	AASDH_-_57253705.23-P1P2|AASDH_+_57253725.23-P1P2
AASDHPPT	P1P2	AASDHPPT_+_105948178.23-P1P2	AASDHPPT_+_105948254.23-P1P2	predicted	predicted	GAGGCTTCGGAGGCGAGCGA	GTCTCGGAGAAAGCAGCTGG	AASDHPPT_+_105948178.23-P1P2|AASDHPPT_+_105948254.23-P1P2
AASS	P1P2	AASS_+_121784462.23-P1P2	AASS_+_121784388.23-P1P2	predicted	predicted	GCAGAGACAGAAGGATCTTG	GATGAGAAGGTTGTTCCCTC	AASS_+_121784462.23-P1P2|AASS_+_121784388.23-P1P2
AATF	P1P2	AATF_+_35306178.23-P1P2	AATF_+_35306123.23-P1P2	predicted	predicted	GGAAGCGCGCAGAAGGTTGA	GCGTGCGAGTGCGCGGGAAG	AATF_+_35306178.23-P1P2|AATF_+_35306123.23-P1P2
AATK	ENST00000326724.4	AATK_-_79140171.23-ENST00000326724.4	AATK_-_79140243.23-ENST00000326724.4	predicted	predicted	Gacacagaagggggcttgga	Gagcggggatggcacggagt	AATK_-_79140171.23-ENST00000326724.4|AATK_-_79140243.23-ENST00000326724.4
ABAT	P1	ABAT_+_8768252.23-P1	ABAT_+_8768301.23-P1	predicted	predicted	GCCCACCAGAGGGACCGCGA	GGGGCAGAGTCCAGCCTCCG	ABAT_+_8768252.23-P1|ABAT_+_8768301.23-P1
ABAT	P2	ABAT_+_8806916.23-P2	ABAT_-_8806964.23-P2	predicted	predicted	GGGGTTGGGGAGGAACCTAC	GGCGGGGTCAGGTGGAGCGT	ABAT_+_8806916.23-P2|ABAT_-_8806964.23-P2
ABCA1	P1P2	ABCA1_+_107690619.23-P1P2	ABCA1_-_107690608.23-P1P2	predicted	predicted	GTCCCTAGATGTGTCGTGGG	GCGGGGCCCGCCCCTTAAAC	ABCA1_+_107690619.23-P1P2|ABCA1_-_107690608.23-P1P2
ABCA10	P1P2	ABCA10_-_67224969.23-P1P2	ABCA10_+_67224929.23-P1P2	predicted	predicted	GAGAGAGTGTAATGAATTGT	GTCTGAAGAGTAACTGGACA	ABCA10_-_67224969.23-P1P2|ABCA10_+_67224929.23-P1P2
ABCA12	P1P2	ABCA12_-_216003511.23-P1P2	ABCA12_-_216003397.23-P1P2	predicted	predicted	GAGAGCATTTCACAGACACT	GGATGCGTCACAGGGACTAG	ABCA12_-_216003511.23-P1P2|ABCA12_-_216003397.23-P1P2
ABCA13	P1P2	ABCA13_-_48210841.23-P1P2	ABCA13_+_48210574.23-P1P2	predicted	predicted	GTGCCCGAGAAAGTCCCTGA	GGAAGCAGTGTTGGTGTCTG	ABCA13_-_48210841.23-P1P2|ABCA13_+_48210574.23-P1P2
ABCA2	P1P2	ABCA2_-_139922859.23-P1P2	ABCA2_+_139922844.23-P1P2	predicted	predicted	Ggccgcgcccgggaccgacc	Gtcgggcccgggtcggtccc	ABCA2_-_139922859.23-P1P2|ABCA2_+_139922844.23-P1P2
ABCA3	P1P2	ABCA3_+_2390869.23-P1P2	ABCA3_+_2390930.23-P1P2	predicted	predicted	GGGGCATGGGCGACATGCAG	GTGCGAACCGCGTACTCGCA	ABCA3_+_2390869.23-P1P2|ABCA3_+_2390930.23-P1P2
ABCA4	P1P2	ABCA4_-_94586933.23-P1P2	ABCA4_-_94586803.23-P1P2	predicted	predicted	GCATGAGAGGGGTTCCTGAG	GGAGGAGGCCGACACTGTGT	ABCA4_-_94586933.23-P1P2|ABCA4_-_94586803.23-P1P2
ABCA5	P1P2	ABCA5_-_67323481.23-P1P2	ABCA5_-_67323403.23-P1P2	predicted	predicted	GCGGAAGAGGAGAGCGGCTG	GAAAGCGCCGCTCCGCGTAC	ABCA5_-_67323481.23-P1P2|ABCA5_-_67323403.23-P1P2
ABCA6	P1P2	ABCA6_-_67138206.23-P1P2	ABCA6_-_67138141.23-P1P2	predicted	predicted	GTTCAACTACAGGGATAAGG	GCAAGGAAATGACTGTTCCG	ABCA6_-_67138206.23-P1P2|ABCA6_-_67138141.23-P1P2
ABCA7	P1	ABCA7_-_1040041.23-P1	ABCA7_+_1039996.23-P1	predicted	predicted	GGAGCAGGCCAGTGAGTGAC	GTCGGAGCTGCGCGGGCCAA	ABCA7_-_1040041.23-P1|ABCA7_+_1039996.23-P1
ABCA7	P2	ABCA7_-_1041060.23-P2	ABCA7_+_1041087.23-P2	predicted	predicted	GTCGGTCCCTGGAGGATTAG	GAGGACTGTCGCTCTGAGCA	ABCA7_-_1041060.23-P2|ABCA7_+_1041087.23-P2
ABCA8	P1P2	ABCA8_-_66951646.23-P1P2	ABCA8_+_66951555.23-P1P2	predicted	predicted	GGAGCAGTGGCATTTATACT	GATGACGTGAATGTGATGTT	ABCA8_-_66951646.23-P1P2|ABCA8_+_66951555.23-P1P2
ABCA9	P1P2	ABCA9_+_67057247.23-P1P2	ABCA9_+_67057187.23-P1P2	predicted	predicted	GTCCCTGCTGAGTAACTAGC	GGAGCAGAAGATATTTTGGC	ABCA9_+_67057247.23-P1P2|ABCA9_+_67057187.23-P1P2
ABCB1	ENST00000265724.3	ABCB1_-_87342884.23-ENST00000265724.3	ABCB1_-_87342889.23-ENST00000265724.3	predicted	predicted	GCGAAGAGTTACATGGCTTA	GAGTTACATGGCTTAGGGAT	ABCB1_-_87342884.23-ENST00000265724.3|ABCB1_-_87342889.23-ENST00000265724.3
ABCB10	P1P2	ABCB10_+_229694571.23-P1P2	ABCB10_+_229694528.23-P1P2	predicted	predicted	GGCACCGCGCGGACGAGGAT	GGGGTGCAGGCACGATAAGG	ABCB10_+_229694571.23-P1P2|ABCB10_+_229694528.23-P1P2
ABCB11	P1P2	ABCB11_-_169887992.23-P1P2	ABCB11_-_169887978.23-P1P2	predicted	predicted	GTGCTTGGGAAACCCTCTGA	GCCAAACACAGAGTGTGCTT	ABCB11_-_169887992.23-P1P2|ABCB11_-_169887978.23-P1P2
ABCB4	P1P2	ABCB4_-_87105352.23-P1P2	ABCB4_+_87105150.23-P1P2	predicted	predicted	GGATGACTGTCACACCCCAT	GCCTGGCCCGCGCCTAGCCT	ABCB4_-_87105352.23-P1P2|ABCB4_+_87105150.23-P1P2
ABCB5	P1P2	ABCB5_-_20686833.23-P1P2	ABCB5_-_20686822.23-P1P2	predicted	predicted	GTCACCATGGGGTTTATACA	GGGGAGTGCAACTCACCATG	ABCB5_-_20686833.23-P1P2|ABCB5_-_20686822.23-P1P2
ABCB6	P1P2	ABCB6_+_220083820.23-P1P2	ABCB6_+_220083910.23-P1P2	predicted	predicted	GCCTGGGCACGTGACCAAGC	GCCCGAGCCAGGATTCCGTG	ABCB6_+_220083820.23-P1P2|ABCB6_+_220083910.23-P1P2
ABCB7	P1P2	ABCB7_-_74376168.23-P1P2	ABCB7_+_74376207.23-P1P2	predicted	predicted	GGACACTGGCGGACTGAATT	GAGAATCCATTTCCGGTCTG	ABCB7_-_74376168.23-P1P2|ABCB7_+_74376207.23-P1P2
ABCB8	P1P2	ABCB8_-_150725248.23-P1P2	ABCB8_-_150725382.23-P1P2	predicted	predicted	GGAAAATGGCCCGAGGTCGG	GTCGGCTCCGCCCAGAGCAG	ABCB8_-_150725248.23-P1P2|ABCB8_-_150725382.23-P1P2
ABCB9	P1	ABCB9_-_123451193.23-P1	ABCB9_+_123451176.23-P1	predicted	predicted	GGAAGCCTCCGGGTGGGGAC	GGAGGCCCGTCCCCACCCGG	ABCB9_-_123451193.23-P1|ABCB9_+_123451176.23-P1
ABCB9	P2	ABCB9_+_123465947.23-P2	ABCB9_-_123465915.23-P2	predicted	predicted	GCGCCTGGCCCTCACATCTC	GAAGTCGGGCGAGCAGTGGT	ABCB9_+_123465947.23-P2|ABCB9_-_123465915.23-P2
ABCC1	P1P2	ABCC1_-_16043124.23-P1P2	ABCC1_+_16043414.23-P1P2	predicted	predicted	GTACACTCCAGGCAGGTAGG	GTGGTTGGCCCGCGCGTCAC	ABCC1_-_16043124.23-P1P2|ABCC1_+_16043414.23-P1P2
ABCC10	P1P2	ABCC10_-_43395154.23-P1P2	ABCC10_-_43395237.23-P1P2	predicted	predicted	GAATGACGTTGCACTAAGGG	GCCAGCGCGCCTGCGTGCAA	ABCC10_-_43395154.23-P1P2|ABCC10_-_43395237.23-P1P2
ABCC11	P1	ABCC11_-_48278360.23-P1	ABCC11_+_48278325.23-P1	predicted	predicted	GCGCTGCTGCTCACCCACGA	GCAGCAGCGGGAGGCGACTG	ABCC11_-_48278360.23-P1|ABCC11_+_48278325.23-P1
ABCC11	P2	ABCC11_-_48281536.23-P2	ABCC11_+_48281681.23-P2	predicted	predicted	GTGGCTGGCATGCTGACCCA	GACCCTGAAAAGTGTAAATT	ABCC11_-_48281536.23-P2|ABCC11_+_48281681.23-P2
ABCC12	ENST00000311303.3	ABCC12_+_48180955.23-ENST00000311303.3	ABCC12_+_48180850.23-ENST00000311303.3	predicted	predicted	GTGACCAGTGGGTATCAGGA	Gtgtgggtgtatgcgcatgg	ABCC12_+_48180955.23-ENST00000311303.3|ABCC12_+_48180850.23-ENST00000311303.3
ABCC2	P1P2	ABCC2_+_101542377.23-P1P2	ABCC2_-_101542206.23-P1P2	predicted	predicted	GACTAAAAAGCCCTAGGGAC	GAAGCGAAACTGCACATTTA	ABCC2_+_101542377.23-P1P2|ABCC2_-_101542206.23-P1P2
ABCC3	P1P2	ABCC3_-_48711944.23-P1P2	ABCC3_-_48712061.23-P1P2	predicted	predicted	GCGGCCCCACGGACTTGTTC	GGCCCAGGGGCCGCTCGCAG	ABCC3_-_48711944.23-P1P2|ABCC3_-_48712061.23-P1P2
ABCC4	P1P2	ABCC4_-_95953932.23-P1P2	ABCC4_+_95953837.23-P1P2	predicted	predicted	GACGCCCAGGGGTGAGGCGA	GCTCCCGCCGCGTCACCCGT	ABCC4_-_95953932.23-P1P2|ABCC4_+_95953837.23-P1P2
ABCC5	P1P2	ABCC5_+_183735827.23-P1P2	ABCC5_+_183735769.23-P1P2	predicted	predicted	GACCGCCCCCGGGATGTCAC	GGCCCTGGGCACTCGGAAGG	ABCC5_+_183735827.23-P1P2|ABCC5_+_183735769.23-P1P2
ABCC6	ENST00000205557.7	ABCC6_+_16317626.23-ENST00000205557.7	ABCC6_-_16317846.23-ENST00000205557.7	predicted	predicted	GCCAAAGTGTTTAGGAAGTC	GAACTTAGAAGATTATGCAA	ABCC6_+_16317626.23-ENST00000205557.7|ABCC6_-_16317846.23-ENST00000205557.7
ABCC8	P1P2	ABCC8_-_17498531.23-P1P2	ABCC8_-_17498596.23-P1P2	predicted	predicted	GGGGCGGCGAGGAACCCGAC	GCTCCCAGATGTTGCCGGGG	ABCC8_-_17498531.23-P1P2|ABCC8_-_17498596.23-P1P2
ABCC9	P1P2	ABCC9_+_22094538.23-P1P2	ABCC9_+_22094392.23-P1P2	predicted	predicted	GTCCTTACGTGGCTAATAAA	GAAGGGGACGCCTATTACTT	ABCC9_+_22094538.23-P1P2|ABCC9_+_22094392.23-P1P2
ABCD1	P1P2	ABCD1_-_152990165.23-P1P2	ABCD1_-_152990199.23-P1P2	predicted	predicted	GGGGCGAGAACGGGAGGTGG	GCCGCCGAGGGGCGAGAACA	ABCD1_-_152990165.23-P1P2|ABCD1_-_152990199.23-P1P2
ABCD2	P1P2	ABCD2_+_40013687.23-P1P2	ABCD2_-_40013821.23-P1P2	predicted	predicted	GGGAAGCTGCGAGGATTCCA	GGTCGAATCAGGCCATCTGC	ABCD2_+_40013687.23-P1P2|ABCD2_-_40013821.23-P1P2
ABCD3	P1P2	ABCD3_-_94883808.23-P1P2	ABCD3_+_94883763.23-P1P2	predicted	predicted	GCGTGCGCAGAGCGCGTCCC	GCGGACTCCTTCAGGGTCTC	ABCD3_-_94883808.23-P1P2|ABCD3_+_94883763.23-P1P2
ABCD4	P1P2	ABCD4_-_74769830.23-P1P2	ABCD4_-_74769803.23-P1P2	predicted	predicted	GACAGCGCCCCCATATTTTC	GAGAGTGGACTCGGCTGACC	ABCD4_-_74769830.23-P1P2|ABCD4_-_74769803.23-P1P2
ABCE1	P1P2	ABCE1_+_146019378.23-P1P2	ABCE1_+_146019314.23-P1P2	predicted	predicted	GCGGAACCCTGGAGGTAGGT	GTGGCGAAGCCAGCTGCTGG	ABCE1_+_146019378.23-P1P2|ABCE1_+_146019314.23-P1P2
ABCF1	P1	ABCF1_+_30539075.23-P1	ABCF1_+_30539070.23-P1	predicted	predicted	GGAGGCGTGGCCTGCAATGA	GGTGGCCTGCAATGACGGAG	ABCF1_+_30539075.23-P1|ABCF1_+_30539070.23-P1
ABCF1	P2	ABCF1_+_30546111.23-P2	ABCF1_+_30546108.23-P2	predicted	predicted	GGGGCGGGTACTGAAATGAC	GCGGGTACTGAAATGACAGG	ABCF1_+_30546111.23-P2|ABCF1_+_30546108.23-P2
ABCF2	P1P2	ABCF2_+_150924431.23-P1P2	ABCF2_+_150924458.23-P1P2	predicted	predicted	GCGCGGCCCCGCGAGGTCTG	GCGAGCCTCGCGCATCCTGA	ABCF2_+_150924431.23-P1P2|ABCF2_+_150924458.23-P1P2
ABCF3	P1P2	ABCF3_+_183903820.23-P1P2	ABCF3_+_183903872.23-P1P2	predicted	predicted	GCGAGCGGGGCCTTGAGGAG	GTGTAGCGGTGACGCAGGAA	ABCF3_+_183903820.23-P1P2|ABCF3_+_183903872.23-P1P2
ABCG1	P1P2	ABCG1_+_43638952.23-P1P2	ABCG1_+_43639008.23-P1P2	predicted	predicted	GGACAGACGCCGGGGTTCCC	GCCGGGTCCCGAACTCGCGG	ABCG1_+_43638952.23-P1P2|ABCG1_+_43639008.23-P1P2
ABCG2	P1P2	ABCG2_-_89080233.23-P1P2	ABCG2_-_89080413.23-P1P2	predicted	predicted	GGTACCACCGCCCTCCCTCG	GGCCGGAGCGCCGAAGCACC	ABCG2_-_89080233.23-P1P2|ABCG2_-_89080413.23-P1P2
ABCG4	P1P2	ABCG4_+_119019610.23-P1P2	ABCG4_+_119019715.23-P1P2	predicted	predicted	GGGGGTGAACTCAGGACTGG	GCGGTCCCGCCGTTCTTAAA	ABCG4_+_119019610.23-P1P2|ABCG4_+_119019715.23-P1P2
ABCG5	P1P2	ABCG5_-_44066429.23-P1P2	ABCG5_-_44066042.23-P1P2	predicted	predicted	GGGCGGAGGGGAACAGATTC	GAACACACACGTTTGTAGGT	ABCG5_-_44066429.23-P1P2|ABCG5_-_44066042.23-P1P2
ABCG8	P1P2	ABCG8_+_44065932.23-P1P2	ABCG8_+_44065925.23-P1P2	predicted	predicted	GCCCAGTCCTGCTGTCCCAA	GCTGCTGTCCCAAGGGACTC	ABCG8_+_44065932.23-P1P2|ABCG8_+_44065925.23-P1P2
ABHD1	P1P2	ABHD1_-_27346531.23-P1P2	ABHD1_-_27346456.23-P1P2	predicted	predicted	GGCTGCACAGCCAAGAACCG	GTCGCCGGGGAAGAGTTTAA	ABHD1_-_27346531.23-P1P2|ABHD1_-_27346456.23-P1P2
ABHD10	P1P2	ABHD10_+_111697851.23-P1P2	ABHD10_+_111697651.23-P1P2	predicted	predicted	GTGAGGGACACGCTACGCAA	GCGGGAGGCTGCCCTATCAG	ABHD10_+_111697851.23-P1P2|ABHD10_+_111697651.23-P1P2
ABHD11	P1P2	ABHD11_+_73153315.23-P1P2	ABHD11_+_73153260.23-P1P2	predicted	predicted	GACGTAATGGCGTAAggggc	Gcgtaaggaaacgggaccaa	ABHD11_+_73153315.23-P1P2|ABHD11_+_73153260.23-P1P2
ABHD12	P1P2	ABHD12_-_25371663.23-P1P2	ABHD12_+_25371569.23-P1P2	predicted	predicted	GAGGGTGGGCGAAGCTGCAG	GGAACTAGAGAGGAGGTGGC	ABHD12_-_25371663.23-P1P2|ABHD12_+_25371569.23-P1P2
ABHD12B	P1P2	ABHD12B_+_51338721.23-P1P2	ABHD12B_-_51338731.23-P1P2	predicted	predicted	GGGTGCGCTCCGCCCGGGTC	GGCCGCGAACAGCCTGACCC	ABHD12B_+_51338721.23-P1P2|ABHD12B_-_51338731.23-P1P2
ABHD13	P1P2	ABHD13_+_108870683.23-P1P2	ABHD13_+_108870666.23-P1P2	predicted	predicted	GCCCGCGACGGTGGCCCGGA	GGACGGAAAAGATACCTCGG	ABHD13_+_108870683.23-P1P2|ABHD13_+_108870666.23-P1P2
ABHD14A	P1P2	ABHD14A_-_52008948.23-P1P2	ABHD14A_+_52008993.23-P1P2	predicted	predicted	GAAGCCACATGGCTCTCCGC	GGCAGAGCCCCAGCGCTCTC	ABHD14A_-_52008948.23-P1P2|ABHD14A_+_52008993.23-P1P2
ABHD14B	P1	ABHD14B_+_52008150.23-P1	ABHD14B_-_52008086.23-P1	predicted	predicted	GGCTGTGAGAACGAGTTTAG	GGCCGGGCCCCATCCAGCGG	ABHD14B_+_52008150.23-P1|ABHD14B_-_52008086.23-P1
ABHD14B	P2	ABHD14B_+_52017506.23-P2	ABHD14B_-_52017533.23-P2	predicted	predicted	GAGGTCGCCTGCGAGGTCGC	GACCTCGCAGGCGACCTCGC	ABHD14B_+_52017506.23-P2|ABHD14B_-_52017533.23-P2
ABHD15	P1P2	ABHD15_-_27894236.23-P1P2	ABHD15_+_27894498.23-P1P2	predicted	predicted	GCAGAGGGTGAGAGGAGCCG	GGGAGAGCAGGGCCGCCCGA	ABHD15_-_27894236.23-P1P2|ABHD15_+_27894498.23-P1P2
ABHD16A	P1P2	ABHD16A_+_31671138.23-P1P2	ABHD16A_-_31671242.23-P1P2	predicted	predicted	GCGGTACGGGCTGACGTCAA	GGGAGCTACGGGTACAGCAG	ABHD16A_+_31671138.23-P1P2|ABHD16A_-_31671242.23-P1P2
ABHD16B	P1P2	ABHD16B_+_62492825.23-P1P2	ABHD16B_+_62492726.23-P1P2	predicted	predicted	GAGGCACAGGGCAGTCTTAG	GTAGGTGATGGGTGCACAAA	ABHD16B_+_62492825.23-P1P2|ABHD16B_+_62492726.23-P1P2
ABHD17A	P1P2	ABHD17A_+_1885661.23-P1P2	ABHD17A_-_1885603.23-P1P2	predicted	predicted	Gtactggcctcaacctattc	GGGGCGGGGCTGATATGTCG	ABHD17A_+_1885661.23-P1P2|ABHD17A_-_1885603.23-P1P2
ABHD17B	P1P2	ABHD17B_-_74526219.23-P1P2	ABHD17B_+_74526192.23-P1P2	predicted	predicted	GAGAGGCCGCCCGGCAGGGT	GCTGCCGGGCGGCCTCTGAT	ABHD17B_-_74526219.23-P1P2|ABHD17B_+_74526192.23-P1P2
ABHD17C	P1P2	ABHD17C_+_80987552.23-P1P2	ABHD17C_+_80987555.23-P1P2	predicted	predicted	Gagcccgggcgggtcagcgg	Gcggagcccgggcgggtcag	ABHD17C_+_80987552.23-P1P2|ABHD17C_+_80987555.23-P1P2
ABHD2	P1P2	ABHD2_-_89631578.23-P1P2	ABHD2_-_89631532.23-P1P2	predicted	predicted	GCGCGGGGCAAGTGGAGAAG	GGAACAGCTTCGCTGATCAA	ABHD2_-_89631578.23-P1P2|ABHD2_-_89631532.23-P1P2
ABHD3	P1P2	ABHD3_-_19284909.23-P1P2	ABHD3_-_19284969.23-P1P2	predicted	predicted	GCCAAGACCGGCCACCGGGA	GGATGGGGATCCCCAAGGGT	ABHD3_-_19284909.23-P1P2|ABHD3_-_19284969.23-P1P2
ABHD4	P1P2	ABHD4_+_23066970.23-P1P2	ABHD4_+_23067000.23-P1P2	predicted	predicted	GTCTCTGACGGTCTCAGAAT	GCAATCACTGGCATGTGTCC	ABHD4_+_23066970.23-P1P2|ABHD4_+_23067000.23-P1P2
ABHD5	P1P2	ABHD5_-_43732225.23-P1P2	ABHD5_-_43732256.23-P1P2	predicted	predicted	GGAGTCTCGCCAGTCCCTCT	GCCGCCCCGCGCTTACACCC	ABHD5_-_43732225.23-P1P2|ABHD5_-_43732256.23-P1P2
ABHD6	P1P2	ABHD6_-_58223389.23-P1P2	ABHD6_+_58223423.23-P1P2	predicted	predicted	GGCAGCGCGCGGAGGAACTG	GgccgcgcgcTGTCCCCCAG	ABHD6_-_58223389.23-P1P2|ABHD6_+_58223423.23-P1P2
ABHD8	P1P2	ABHD8_+_17414376.23-P1P2	ABHD8_-_17414358.23-P1P2	predicted	predicted	GGTGAACCCCCAAAAGGGGC	GGGCAATTCCGTAGTGGAGG	ABHD8_+_17414376.23-P1P2|ABHD8_-_17414358.23-P1P2
ABI1	P1P2	ABI1_-_27150085.23-P1P2	ABI1_+_27149964.23-P1P2	predicted	predicted	GGGGAATTGTAGTCTCTCCT	GTCAGGCGGCTGCACGAAGG	ABI1_-_27150085.23-P1P2|ABI1_+_27149964.23-P1P2
ABI2	P1P2	ABI2_-_204192963.23-P1P2	ABI2_+_204192729.23-P1P2	predicted	predicted	GCGGCGGCGCGGGCGAGGGT	GCTCCCTCCGGGACTCATCT	ABI2_-_204192963.23-P1P2|ABI2_+_204192729.23-P1P2
ABI3	P1P2	ABI3_-_47287417.23-P1P2	ABI3_-_47288028.23-P1P2	predicted	predicted	GcaTCTGCACAGAGCGTGTA	GAGGCAGAGCAACCAATCAA	ABI3_-_47287417.23-P1P2|ABI3_-_47288028.23-P1P2
ABI3BP	P1P2	ABI3BP_-_100712361.23-P1P2	ABI3BP_+_100712343.23-P1P2	predicted	predicted	GGTGCCGTGGGCTTACTCAC	GCCCCCTGTGAGTAAGCCCA	ABI3BP_-_100712361.23-P1P2|ABI3BP_+_100712343.23-P1P2
ABL1	ENST00000372348.2	ABL1_-_133589216.23-ENST00000372348.2	ABL1_+_133588936.23-ENST00000372348.2	predicted	predicted	GCAAAGCAGAGAAGCGAGAG	GACCCCTTGACAGCAAGGGA	ABL1_-_133589216.23-ENST00000372348.2|ABL1_+_133588936.23-ENST00000372348.2
ABL2	P1	ABL2_-_179112359.23-P1	ABL2_-_179112315.23-P1	predicted	predicted	GTGGGTGGAGAGTGACCTAA	GCCAGAGGGAACCAATAAAA	ABL2_-_179112359.23-P1|ABL2_-_179112315.23-P1
ABL2	P2	ABL2_-_179199180.23-P2	ABL2_-_179198903.23-P2	predicted	predicted	GTGTCAAATGAGTGAGTCGA	GCCTCCGCCGCGGGGAAGGA	ABL2_-_179199180.23-P2|ABL2_-_179198903.23-P2
ABLIM1	ENST00000277895.5	ABLIM1_-_116418175.23-ENST00000277895.5	ABLIM1_+_116418171.23-ENST00000277895.5	predicted	predicted	GTATAAAAACAGCCACTACC	GACTGAAAGTCTCGAGTTCC	ABLIM1_-_116418175.23-ENST00000277895.5|ABLIM1_+_116418171.23-ENST00000277895.5
ABLIM2	P1P2	ABLIM2_-_8160657.23-P1P2	ABLIM2_-_8160767.23-P1P2	predicted	predicted	GtgccgcccGGGAGCACCCT	GCGCAGGCGCAGACGGGCGA	ABLIM2_-_8160657.23-P1P2|ABLIM2_-_8160767.23-P1P2
ABLIM3	P1P2	ABLIM3_-_148520884.23-P1P2	ABLIM3_+_148520962.23-P1P2	predicted	predicted	GGAACCCCAGGATCGAGGGA	GCCTGGGCCCTAGGGTGTGA	ABLIM3_-_148520884.23-P1P2|ABLIM3_+_148520962.23-P1P2
ABO	P1	ABO_-_136150814.23-P1	ABO_-_136150767.23-P1	predicted	predicted	GTCCTCGCGCGCATCCCCAA	GAGGCGGCCGCGGGTCCCCA	ABO_-_136150814.23-P1|ABO_-_136150767.23-P1
ABO	P2	ABO_+_136131048.23-P2	ABO_+_136131066.23-P2	predicted	predicted	GGCGGTCCGGAACCCGTGAG	GGTGCCCAAGAACCACCAGG	ABO_+_136131048.23-P2|ABO_+_136131066.23-P2
ABR	P1P2	ABR_-_1083425.23-P1P2	ABR_+_1083406.23-P1P2	predicted	predicted	GGCCCCCGGCCGGGCTAAGG	GTGCCCCCTTAGCCCGGCCG	ABR_-_1083425.23-P1P2|ABR_+_1083406.23-P1P2
ABRA	P1P2	ABRA_-_107782633.23-P1P2	ABRA_-_107782658.23-P1P2	predicted	predicted	GGACAGCTCCAGTTTCATCA	GAGGGACATCTCTGCTGGTA	ABRA_-_107782633.23-P1P2|ABRA_-_107782658.23-P1P2
ABRACL	P1P2	ABRACL_+_139349742.23-P1P2	ABRACL_+_139349778.23-P1P2	predicted	predicted	GAAAGGGGCTGACTGCAGAC	GCTATGAGGAGGAAACTCAG	ABRACL_+_139349742.23-P1P2|ABRACL_+_139349778.23-P1P2
ABT1	P1P2	ABT1_+_26597028.23-P1P2	ABT1_+_26596978.23-P1P2	predicted	predicted	GAGGGAGGAAGTGGTGTGTC	GGGGATGGGAAACTTGGGTT	ABT1_+_26597028.23-P1P2|ABT1_+_26596978.23-P1P2
ABTB1	P1P2	ABTB1_+_127391620.23-P1P2	ABTB1_+_127391638.23-P1P2	predicted	predicted	GTGGGCCCGGCGTGGTCTCC	GTCAAGAAGGCAGACGCGCT	ABTB1_+_127391620.23-P1P2|ABTB1_+_127391638.23-P1P2
ABTB2	P1P2	ABTB2_-_34379880.23-P1P2	ABTB2_+_34379742.23-P1P2	predicted	predicted	GGCGGTCGAAACGATAGCTC	GcAGCCGCGTGCCCGACCCT	ABTB2_-_34379880.23-P1P2|ABTB2_+_34379742.23-P1P2
ACAA1	P1P2	ACAA1_+_38178792.23-P1P2	ACAA1_-_38178773.23-P1P2	predicted	predicted	GGGGCATTGAGTGGAAAGCT	GTACCAAGCCCTCTATAGGA	ACAA1_+_38178792.23-P1P2|ACAA1_-_38178773.23-P1P2
ACAA2	P1P2	ACAA2_+_47340045.23-P1P2	ACAA2_+_47340202.23-P1P2	predicted	predicted	GGCTCCCTCGGGCTGGGGTG	GGGGAAGAGTCATCGCCTGT	ACAA2_+_47340045.23-P1P2|ACAA2_+_47340202.23-P1P2
ACACA	P1P2	ACACA_+_35716176.23-P1P2	ACACA_+_35716420.23-P1P2	predicted	predicted	GGAGCGGGGTCGGAGGTGAA	GTACCCGGCTGTGGCAGAAG	ACACA_+_35716176.23-P1P2|ACACA_+_35716420.23-P1P2
ACACB	P1	ACACB_-_109568981.23-P1	ACACB_+_109568920.23-P1	predicted	predicted	GTAAGCTTGAGGTCAGGAGA	GTGTGCTCCCAGGGGCTTCG	ACACB_-_109568981.23-P1|ACACB_+_109568920.23-P1
ACACB	P2	ACACB_-_109592276.23-P2	ACACB_-_109592361.23-P2	predicted	predicted	GTGTAGGGGTGTCCCATATT	GTCAGCGGCGGGTCGGAGGT	ACACB_-_109592276.23-P2|ACACB_-_109592361.23-P2
ACAD10	P1P2	ACAD10_+_112123782.23-P1P2	ACAD10_+_112123750.23-P1P2	predicted	predicted	GGTAAACCGCAGGTCAGCGA	GGCGGAAGTGGAGGTTGTTG	ACAD10_+_112123782.23-P1P2|ACAD10_+_112123750.23-P1P2
ACAD11	P1P2	ACAD11_-_132379124.23-P1P2	ACAD11_-_132379184.23-P1P2	predicted	predicted	GTTAGCCGGCCCAGCGAGGA	GGTCTGCGACGCACCGGAAG	ACAD11_-_132379124.23-P1P2|ACAD11_-_132379184.23-P1P2
ACAD8	P1P2	ACAD8_+_134123328.23-P1P2	ACAD8_-_134123391.23-P1P2	predicted	predicted	GTGCCAGGCGGGCTCCCAAG	GGGGAGGACTACAACCCCCA	ACAD8_+_134123328.23-P1P2|ACAD8_-_134123391.23-P1P2
ACAD9	P1P2	ACAD9_+_128598208.23-P1P2	ACAD9_-_128598349.23-P1P2	predicted	predicted	GGGGCCGCGGGCATCTCGGC	GAGCCAGGTGCACGTGACTA	ACAD9_+_128598208.23-P1P2|ACAD9_-_128598349.23-P1P2
ACADL	P1P2	ACADL_+_211090261.23-P1P2	ACADL_+_211090665.23-P1P2	predicted	predicted	Ggcgcttcaggacgctaaaa	GGGCGAGAGTAATTGTTCAA	ACADL_+_211090261.23-P1P2|ACADL_+_211090665.23-P1P2
ACADM	P1P2	ACADM_-_76190263.23-P1P2	ACADM_+_76190222.23-P1P2	predicted	predicted	GACGGCGCACGCAAGGGTCA	GGTCGCTGCGACCTGGGGAG	ACADM_-_76190263.23-P1P2|ACADM_+_76190222.23-P1P2
ACADS	P1P2	ACADS_-_121163513.23-P1P2	ACADS_+_121163487.23-P1P2	predicted	predicted	GCGCGCGCGCAGTCGAGCGT	GGCTCGACTGCGCGCGCGGT	ACADS_-_121163513.23-P1P2|ACADS_+_121163487.23-P1P2
ACADSB	P1P2	ACADSB_-_124768371.23-P1P2	ACADSB_+_124768332.23-P1P2	predicted	predicted	GCTCGCGTGAGCAGGATGGA	GCGAGACTTGAGCAAGGCAG	ACADSB_-_124768371.23-P1P2|ACADSB_+_124768332.23-P1P2
ACADVL	P1P2	ACADVL_-_7123220.23-P1P2	ACADVL_-_7123126.23-P1P2	predicted	predicted	GGCACTGTGGACGATGAGTC	GGGAGATCCCTCTAAGTCAG	ACADVL_-_7123220.23-P1P2|ACADVL_-_7123126.23-P1P2
ACAN	P1P2	ACAN_+_89346533.23-P1P2	ACAN_+_89346595.23-P1P2	predicted	predicted	GGACCGAGGGGCGGCCGACA	Gggagggcccgtgaggggtg	ACAN_+_89346533.23-P1P2|ACAN_+_89346595.23-P1P2
ACAP1	P1P2	ACAP1_+_7239809.23-P1P2	ACAP1_-_7239650.23-P1P2	predicted	predicted	GGGGCCTGGGCGGAGGATGG	Ggaatcagagagctcgtcca	ACAP1_+_7239809.23-P1P2|ACAP1_-_7239650.23-P1P2
ACAP2	P1P2	ACAP2_+_195163975.23-P1P2	ACAP2_-_195163913.23-P1P2	predicted	predicted	GGACGCCCGCGCATCCCGGT	GGGGCAACGGGTCTGAGCGA	ACAP2_+_195163975.23-P1P2|ACAP2_-_195163913.23-P1P2
ACAP3	P1P2	ACAP3_-_1243504.23-P1P2	ACAP3_+_1243301.23-P1P2	predicted	predicted	GTCCAGGGACCACCCCGGTC	Ggcgcggcggcctcattccg	ACAP3_-_1243504.23-P1P2|ACAP3_+_1243301.23-P1P2
ACAT1	P1P2	ACAT1_+_107992111.23-P1P2	ACAT1_-_107992267.23-P1P2	predicted	predicted	GGACGAGTGAAGGACGTGGA	GTGCCCGCGCCGGGCCGCTA	ACAT1_+_107992111.23-P1P2|ACAT1_-_107992267.23-P1P2
ACAT2	P1P2	ACAT2_-_160183054.23-P1P2	ACAT2_-_160182997.23-P1P2	predicted	predicted	GCCGCCCGCGGCAGGCCTGT	GGCGCGGGGAGGTGGTGCGC	ACAT2_-_160183054.23-P1P2|ACAT2_-_160182997.23-P1P2
ACBD3	P1P2	ACBD3_+_226374526.23-P1P2	ACBD3_+_226374563.23-P1P2	predicted	predicted	GGGCAACTGACGATTCCGGA	GGGGAGTTGGGGAGCCTGAA	ACBD3_+_226374526.23-P1P2|ACBD3_+_226374563.23-P1P2
ACBD4	P1	ACBD4_+_43212875.23-P1	ACBD4_+_43212843.23-P1	predicted	predicted	GCAGGCGGGGCTTAATCGAA	GCAGCCCGGGATGGCCAAGG	ACBD4_+_43212875.23-P1|ACBD4_+_43212843.23-P1
ACBD4	P2	ACBD4_-_43209908.23-P2	ACBD4_-_43209820.23-P2	predicted	predicted	GTAGCGGCGCGGGAGGGAGT	GgggcccggggTCTGCACGC	ACBD4_-_43209908.23-P2|ACBD4_-_43209820.23-P2
ACBD5	P1P2	ACBD5_-_27529882.23-P1P2	ACBD5_+_27529754.23-P1P2	predicted	predicted	GTGTCCCCAGAGGAGGGTCC	GGGGTCCTCCGGTGACTCTG	ACBD5_-_27529882.23-P1P2|ACBD5_+_27529754.23-P1P2
ACBD6	P1P2	ACBD6_-_180471832.23-P1P2	ACBD6_+_180472052.23-P1P2	predicted	predicted	GTGCGCCGGCGGGGAAGCGC	GGCTTGGGGCGCACAATCTG	ACBD6_-_180471832.23-P1P2|ACBD6_+_180472052.23-P1P2
ACBD7	P1P2	ACBD7_-_15130938.23-P1P2	ACBD7_-_15130872.23-P1P2	predicted	predicted	GCCCCAGGCTGCAAATGGAA	GGCCGCCTCCCATTGGTCGC	ACBD7_-_15130938.23-P1P2|ACBD7_-_15130872.23-P1P2
ACCS	P1P2	ACCS_+_44087774.23-P1P2	ACCS_+_44087724.23-P1P2	predicted	predicted	GCCTGCGGCGACTTACGCGT	GCGCCCGGACTAGGAGACTG	ACCS_+_44087774.23-P1P2|ACCS_+_44087724.23-P1P2
ACCSL	ENST00000378832.1	ACCSL_+_44069477.23-ENST00000378832.1	ACCSL_+_44069382.23-ENST00000378832.1	predicted	predicted	GGGACCCTCAGGTCCAGGAA	GAAGAGTTACCTACTCTTTA	ACCSL_+_44069477.23-ENST00000378832.1|ACCSL_+_44069382.23-ENST00000378832.1
ACD	P1P2	ACD_+_67694314.23-P1P2	ACD_+_67694237.23-P1P2	predicted	predicted	GCCAGCATCCCGTGCACCAG	GGGCGCGGGGTGTACGTGGG	ACD_+_67694314.23-P1P2|ACD_+_67694237.23-P1P2
ACE	P1	ACE_-_61554274.23-P1	ACE_-_61554354.23-P1	predicted	predicted	GCCACCCCCGGGCTGCACCT	GGGGGACTCTGGAGCGGAGG	ACE_-_61554274.23-P1|ACE_-_61554354.23-P1
ACE	P2	ACE_-_61562117.23-P2	ACE_+_61562033.23-P2	predicted	predicted	GAGGGTGTGCTCAGACCTGA	GAGGCCCTGCTGATGAGCTT	ACE_-_61562117.23-P2|ACE_+_61562033.23-P2
ACE2	P1P2	ACE2_+_15619116.23-P1P2	ACE2_+_15619290.23-P1P2	predicted	predicted	GGCGCCCAACCCAAGTTCAA	GAGGAGAGGTAAGGTTCTCT	ACE2_+_15619116.23-P1P2|ACE2_+_15619290.23-P1P2
ACER1	P1P2	ACER1_-_6333764.23-P1P2	ACER1_-_6333720.23-P1P2	predicted	predicted	GCAGCCCTGAGCATAAGCCG	GCCGCTCCCCAGTTGCACCA	ACER1_-_6333764.23-P1P2|ACER1_-_6333720.23-P1P2
ACER2	P1P2	ACER2_-_19408914.23-P1P2	ACER2_+_19408797.23-P1P2	predicted	predicted	GGAGTAACCTCCCGCAGGCG	GTCCAGGGTGGGGCGCCTGG	ACER2_-_19408914.23-P1P2|ACER2_+_19408797.23-P1P2
ACER3	P1P2	ACER3_-_76571769.23-P1P2	ACER3_-_76571797.23-P1P2	predicted	predicted	GCCCCGCCCAAGGGTGAAGA	GCCAGCCGGCGCCCTCCGAG	ACER3_-_76571769.23-P1P2|ACER3_-_76571797.23-P1P2
ACHE	P1	ACHE_+_100493634.23-P1	ACHE_+_100493652.23-P1	predicted	predicted	GCGGGTCTCGGCTCCAAGGG	GTCTGGGCCCCGGGGTCTCC	ACHE_+_100493634.23-P1|ACHE_+_100493652.23-P1
ACHE	P2	ACHE_-_100494778.23-P2	ACHE_+_100494723.23-P2	predicted	predicted	GGCCTCGCAGGGGTTGAATC	GTGCCCGCGGTCCCTggcgg	ACHE_-_100494778.23-P2|ACHE_+_100494723.23-P2
ACIN1	P1	ACIN1_-_23564466.23-P1	ACIN1_+_23564521.23-P1	predicted	predicted	GAGAACTCCCCGGGTTCCTC	GCGAGAAAAGGGGCGCTGCA	ACIN1_-_23564466.23-P1|ACIN1_+_23564521.23-P1
ACIN1	P2	ACIN1_-_23540961.23-P2	ACIN1_-_23540887.23-P2	predicted	predicted	GTACAGAGGCTTAACCCCCC	GTATCCTTTGGCAGGCCACA	ACIN1_-_23540961.23-P2|ACIN1_-_23540887.23-P2
ACKR2	P1P2	ACKR2_+_42850737.23-P1P2	ACKR2_+_42850788.23-P1P2	predicted	predicted	Gtaaaactttgatcaatagg	Gacagagtcacctgtatctt	ACKR2_+_42850737.23-P1P2|ACKR2_+_42850788.23-P1P2
ACKR3	P1	ACKR3_+_237478274.23-P1	ACKR3_-_237478326.23-P1	predicted	predicted	GCCTGCACAAGTGTACTCTT	GACTAGTGAGGTTTACAAGA	ACKR3_+_237478274.23-P1|ACKR3_-_237478326.23-P1
ACKR3	P2	ACKR3_+_237476323.23-P2	ACKR3_-_237476409.23-P2	predicted	predicted	GCAAGCGCCAGCGGGGAATG	GCGGAACTAGGGGACGGGTG	ACKR3_+_237476323.23-P2|ACKR3_-_237476409.23-P2
ACKR4	P1P2	ACKR4_-_132315917.23-P1P2	ACKR4_-_132315833.23-P1P2	predicted	predicted	GACTAAGTGGAAACTATGAA	GGTGCTGCCTAGATGCCCTC	ACKR4_-_132315917.23-P1P2|ACKR4_-_132315833.23-P1P2
ACLY	P1P2	ACLY_+_40075360.23-P1P2	ACLY_-_40075349.23-P1P2	predicted	predicted	GCCCGGGGCCCGCCCTCGTG	GGCTCCTCCCAATTCGCTGC	ACLY_+_40075360.23-P1P2|ACLY_-_40075349.23-P1P2
ACMSD	P1P2	ACMSD_-_135596123.23-P1P2	ACMSD_-_135596149.23-P1P2	predicted	predicted	GAATGGACCTAGACTGGGTT	GCCTACTGACTGCTGCCTGA	ACMSD_-_135596123.23-P1P2|ACMSD_-_135596149.23-P1P2
ACN9	P1P2	ACN9_-_96746823.23-P1P2	ACN9_+_96746913.23-P1P2	predicted	predicted	GCGCAGGCGCGACTCCACGA	GAGGGCGCGCGACCTCTATC	ACN9_-_96746823.23-P1P2|ACN9_+_96746913.23-P1P2
ACO1	P1P2	ACO1_+_32384489.23-P1P2	ACO1_+_32384509.23-P1P2	predicted	predicted	GGGCCTGGAGGACTTCGCCC	GAGCCTGCGGGCGCCCCCGC	ACO1_+_32384489.23-P1P2|ACO1_+_32384509.23-P1P2
ACO2	P1P2	ACO2_+_41865000.23-P1P2	ACO2_+_41864997.23-P1P2	predicted	predicted	GAGAACCCTGTGAACGCAAT	GACCCTGTGAACGCAATGGG	ACO2_+_41865000.23-P1P2|ACO2_+_41864997.23-P1P2
ACOT1	P1P2	ACOT1_+_74003620.23-P1P2	ACOT1_+_74003625.23-P1P2	predicted	predicted	GGCGAAGAGGAATGCAGGAC	GTGATGGCGAAGAGGAATGC	ACOT1_+_74003620.23-P1P2|ACOT1_+_74003625.23-P1P2
ACOT11	P1	ACOT11_+_55013701.23-P1	ACOT11_+_55013737.23-P1	predicted	predicted	GTAGGCCACAGCCACGTCAA	GGCCCGCCTAGCGGAGAGGA	ACOT11_+_55013701.23-P1|ACOT11_+_55013737.23-P1
ACOT11	P2	ACOT11_+_55007792.23-P2	ACOT11_+_55007843.23-P2	predicted	predicted	GCCCGCAAGGCGTCAATCCC	GCCCAGGCTGCACATCACAC	ACOT11_+_55007792.23-P2|ACOT11_+_55007843.23-P2
ACOT12	P1P2	ACOT12_+_80690102.23-P1P2	ACOT12_-_80690194.23-P1P2	predicted	predicted	GCCCCACTCGCGATAGTCCT	GAGGGGGCTCCCGGGTAGAC	ACOT12_+_80690102.23-P1P2|ACOT12_-_80690194.23-P1P2
ACOT13	P1P2	ACOT13_-_24667190.23-P1P2	ACOT13_+_24667097.23-P1P2	predicted	predicted	GCGCTCCCGCATCAACCGCC	GTAAAGGGGCGGTGCAGAGG	ACOT13_-_24667190.23-P1P2|ACOT13_+_24667097.23-P1P2
ACOT2	P1P2	ACOT2_+_74035734.23-P1P2	ACOT2_+_74035935.23-P1P2	predicted	predicted	GGCTTGCTGGCCTGCGGAAT	GGCTTGTTAGACATCCTCTC	ACOT2_+_74035734.23-P1P2|ACOT2_+_74035935.23-P1P2
ACOT4	P1P2	ACOT4_+_74058714.23-P1P2	ACOT4_+_74058635.23-P1P2	predicted	predicted	GCGCGCACGGCAATGCGCAC	GGCCGGAGCGGGGAATTCAA	ACOT4_+_74058714.23-P1P2|ACOT4_+_74058635.23-P1P2
ACOT6	P1P2	ACOT6_+_74077533.23-P1P2	ACOT6_-_74077567.23-P1P2	predicted	predicted	Gaggggctggaatagagcca	Gccagcccctccctacaaac	ACOT6_+_74077533.23-P1P2|ACOT6_-_74077567.23-P1P2
ACOT7	P1P2	ACOT7_-_6453463.23-P1P2	ACOT7_-_6453488.23-P1P2	predicted	predicted	GAGCCCGGGCCGCGCCATAA	GAGGGCAGAGGTGGAGCGAT	ACOT7_-_6453463.23-P1P2|ACOT7_-_6453488.23-P1P2
ACOT8	P1P2	ACOT8_-_44486122.23-P1P2	ACOT8_-_44486206.23-P1P2	predicted	predicted	GACTCCTGTCAGTCCGCTGG	GACTGGATATGTCGCTGAGG	ACOT8_-_44486122.23-P1P2|ACOT8_-_44486206.23-P1P2
ACOT9	P1P2	ACOT9_+_23761452.23-P1P2	ACOT9_-_23761605.23-P1P2	predicted	predicted	GCTCCCGCCAATGAACGGGT	GAGGGCGTGACGTCGAGAAG	ACOT9_+_23761452.23-P1P2|ACOT9_-_23761605.23-P1P2
ACOX1	P1P2	ACOX1_+_73975656.23-P1P2	ACOX1_+_73975689.23-P1P2	predicted	predicted	GAGGCCGCGGGGTAAGAGGG	GAGGCCTAGGGGCACGGACC	ACOX1_+_73975656.23-P1P2|ACOX1_+_73975689.23-P1P2
ACOX2	P1	ACOX2_+_58523057.23-P1	ACOX2_-_58523068.23-P1	predicted	predicted	GGCTCCATAAGCCCAGACAA	GTGCTCTCAAGCCCTTGTCT	ACOX2_+_58523057.23-P1|ACOX2_-_58523068.23-P1
ACOX2	P2	ACOX2_-_58512608.23-P2	ACOX2_-_58512649.23-P2	predicted	predicted	GTGTAGGGGCATAAGAGTGA	GGTCTCCAGGATTGGGAAGA	ACOX2_-_58512608.23-P2|ACOX2_-_58512649.23-P2
ACOX3	P1	ACOX3_-_8430302.23-P1	ACOX3_+_8430197.23-P1	predicted	predicted	GGACGCCGCTGCCACCCGGG	GCCGCCCATGGGACGGACGG	ACOX3_-_8430302.23-P1|ACOX3_+_8430197.23-P1
ACOX3	P2	ACOX3_-_8442586.23-P2	ACOX3_-_8442629.23-P2	predicted	predicted	GGTACCGGGATCAGCTACCC	GCTGGGCTGCGGTCGAAGTG	ACOX3_-_8442586.23-P2|ACOX3_-_8442629.23-P2
ACOXL	P1P2	ACOXL_-_111490053.23-P1P2	ACOXL_+_111490003.23-P1P2	predicted	predicted	GCCTCCCGCCCgggaagcca	GCGAGCGGGCGCTTCTACGG	ACOXL_-_111490053.23-P1P2|ACOXL_+_111490003.23-P1P2
ACP1	P1P2	ACP1_+_264780.23-P1P2	ACP1_+_264763.23-P1P2	predicted	predicted	GTGCGGAGGCGGTCCTATGA	GGACGGTAGTAGGACGGGCG	ACP1_+_264780.23-P1P2|ACP1_+_264763.23-P1P2
ACP2	P1P2	ACP2_-_47270499.23-P1P2	ACP2_-_47270745.23-P1P2	predicted	predicted	GGAAAAGGCGCAGTCTCGGT	GGGGTGCAGAATTGAGGCGA	ACP2_-_47270499.23-P1P2|ACP2_-_47270745.23-P1P2
ACP5	P1	ACP5_-_11688616.23-P1	ACP5_+_11688655.23-P1	predicted	predicted	GCAGGACACGGGATTGGGGT	GGTCCACCCGGAGGCTGTGT	ACP5_-_11688616.23-P1|ACP5_+_11688655.23-P1
ACP5	P2	ACP5_+_11689998.23-P2	ACP5_-_11689955.23-P2	predicted	predicted	GGCAGATGGAGGCTCCTGGT	GCAGCTGCAGCTGGGCTAGA	ACP5_+_11689998.23-P2|ACP5_-_11689955.23-P2
ACP6	P1P2	ACP6_-_147142667.23-P1P2	ACP6_+_147142638.23-P1P2	predicted	predicted	GGACCCGCGCACAGGAGCAC	GCCTGTGCGCGGGTCCACTT	ACP6_-_147142667.23-P1P2|ACP6_+_147142638.23-P1P2
ACPL2	P1P2	ACPL2_-_140950562.23-P1P2	ACPL2_+_140950525.23-P1P2	predicted	predicted	GCCTCCGGGGCGGAGCTCCA	GCGGAGGCGGTGTTGCGGTG	ACPL2_-_140950562.23-P1P2|ACPL2_+_140950525.23-P1P2
ACPP	P1P2	ACPP_+_132036148.23-P1P2	ACPP_+_132036046.23-P1P2	predicted	predicted	GAGGAAGCGTAGGGCAGGTT	Gcggggaaagctgttgatca	ACPP_+_132036148.23-P1P2|ACPP_+_132036046.23-P1P2
ACPT	ENST00000270593.1	ACPT_-_51293548.23-ENST00000270593.1	ACPT_-_51293592.23-ENST00000270593.1	predicted	predicted	GGGCAGAGGCGCTGGGGAAT	GTGCCAGGGCCTGCTATAAT	ACPT_-_51293548.23-ENST00000270593.1|ACPT_-_51293592.23-ENST00000270593.1
ACR	P1P2	ACR_+_51176472.23-P1P2	ACR_-_51176559.23-P1P2	predicted	predicted	GCCCCCACCACCAGGATGAT	GAAGGCGAGGGGCTCTTACC	ACR_+_51176472.23-P1P2|ACR_-_51176559.23-P1P2
ACRBP	P1P2	ACRBP_-_6756664.23-P1P2	ACRBP_-_6756655.23-P1P2	predicted	predicted	GCACAAAGAGCGGGCCGGGG	GCCCACGCGTCACAAAGAGC	ACRBP_-_6756664.23-P1P2|ACRBP_-_6756655.23-P1P2
ACRC	P1P2	ACRC_+_70797805.23-P1P2	ACRC_+_70797793.23-P1P2	predicted	predicted	Gcgggagcaggggcgtggac	Gcgtggacgggaacaccgag	ACRC_+_70797805.23-P1P2|ACRC_+_70797793.23-P1P2
ACRV1	P1P2	ACRV1_+_125550902.23-P1P2	ACRV1_+_125551094.23-P1P2	predicted	predicted	GGCACACAGAAAATAATCAT	Gtacagatcagagccaagaa	ACRV1_+_125550902.23-P1P2|ACRV1_+_125551094.23-P1P2
ACSBG1	P1P2	ACSBG1_+_78526895.23-P1P2	ACSBG1_-_78527146.23-P1P2	predicted	predicted	GCACCCCCACTGCTCACTCA	GAGGTCTGGCCAATGGGCTC	ACSBG1_+_78526895.23-P1P2|ACSBG1_-_78527146.23-P1P2
ACSBG2	P1P2	ACSBG2_+_6135301.23-P1P2	ACSBG2_-_6135600.23-P1P2	predicted	predicted	Gccgcccaggcagggagtct	GCTGGAAGCAGCTTCCCCTA	ACSBG2_+_6135301.23-P1P2|ACSBG2_-_6135600.23-P1P2
ACSF2	P1P2	ACSF2_+_48503247.23-P1P2	ACSF2_-_48503219.23-P1P2	predicted	predicted	GACATCCGTGAGGGGCCAGA	GGGCCAGCACGTGACCCGAG	ACSF2_+_48503247.23-P1P2|ACSF2_-_48503219.23-P1P2
ACSF3	P1P2	ACSF3_-_89160046.23-P1P2	ACSF3_-_89160158.23-P1P2	predicted	predicted	GAGGCCCAGCAATCCGCGTT	GGGCCCCGACCCCGCCACGA	ACSF3_-_89160046.23-P1P2|ACSF3_-_89160158.23-P1P2
ACSL1	P1P2	ACSL1_-_185747367.23-P1P2	ACSL1_+_185747320.23-P1P2	predicted	predicted	GCGGGTGGCCGGCGGTCGAG	GCCACGCGCGCCCAGACAGG	ACSL1_-_185747367.23-P1P2|ACSL1_+_185747320.23-P1P2
ACSL3	P1P2	ACSL3_+_223725634.23-P1P2	ACSL3_+_223725585.23-P1P2	predicted	predicted	GGGGCTGGGCCTATCGAATT	GgggcggggcgAGGTTACTA	ACSL3_+_223725634.23-P1P2|ACSL3_+_223725585.23-P1P2
ACSL4	P1P2	ACSL4_-_108976689.23-P1P2	ACSL4_-_108976623.23-P1P2	predicted	predicted	GGGGACGTCAGTCGAAAAGG	GGCAGAGCCAGCCGAATCGC	ACSL4_-_108976689.23-P1P2|ACSL4_-_108976623.23-P1P2
ACSL5	P1	ACSL5_-_114135828.23-P1	ACSL5_+_114135885.23-P1	predicted	predicted	GGGCAGGGTCAACTGTGTTG	GGAAGCTGCCAAAGCTACCC	ACSL5_-_114135828.23-P1|ACSL5_+_114135885.23-P1
ACSL5	P2	ACSL5_-_114133661.23-P2	ACSL5_+_114133632.23-P2	predicted	predicted	GTGAGGTAGAGCTTTATCGA	GAAAGCTCTACCTCAGGGGA	ACSL5_-_114133661.23-P2|ACSL5_+_114133632.23-P2
ACSL6	P1	ACSL6_-_131347544.23-P1	ACSL6_-_131347517.23-P1	predicted	predicted	GGAACCGCCAAGCTCCCGGG	GGCTTGCCCCGCACTGACCG	ACSL6_-_131347544.23-P1|ACSL6_-_131347517.23-P1
ACSL6	P2	ACSL6_-_131310907.23-P2	ACSL6_-_131311001.23-P2	predicted	predicted	GgaCAGGGCAGCATAGGAAG	GCAGCAGAGTGGGCTCCGCA	ACSL6_-_131310907.23-P2|ACSL6_-_131311001.23-P2
ACSM1	P1P2	ACSM1_-_20688026.23-P1P2	ACSM1_-_20687575.23-P1P2	predicted	predicted	Gtgcaaggaggcatggtcgt	Gggacaagaggacacccact	ACSM1_-_20688026.23-P1P2|ACSM1_-_20687575.23-P1P2
ACSM2A	P1P2	ACSM2A_+_20462646.23-P1P2	ACSM2A_+_20462712.23-P1P2	predicted	predicted	GAGAGAAATGGAGCTCACAT	GAATCCAAGGGGCATGAAGC	ACSM2A_+_20462646.23-P1P2|ACSM2A_+_20462712.23-P1P2
ACSM2B	P1P2	ACSM2B_-_20587884.23-P1P2	ACSM2B_-_20587818.23-P1P2	predicted	predicted	GAGAGAAATGGAGCTCACAT	GAATCCAAGGGGCATGAAGC	ACSM2B_-_20587884.23-P1P2|ACSM2B_-_20587818.23-P1P2
ACSM3	P1P2	ACSM3_+_20775240.23-P1P2	ACSM3_+_20775201.23-P1P2	predicted	predicted	GTGGAGGAGGAGCCAAGCTC	GTCCCAGCGGTTCCTCTTAC	ACSM3_+_20775240.23-P1P2|ACSM3_+_20775201.23-P1P2
ACSM4	ENST00000399422.4	ACSM4_-_7456717.23-ENST00000399422.4	ACSM4_+_7456783.23-ENST00000399422.4	predicted	predicted	Gatgaagaggaagggtccag	GTGTGTGTCCCTGGCAAGTT	ACSM4_-_7456717.23-ENST00000399422.4|ACSM4_+_7456783.23-ENST00000399422.4
ACSM5	P1P2	ACSM5_+_20420690.23-P1P2	ACSM5_+_20420687.23-P1P2	predicted	predicted	GCTGGTGGGTGTGCCCAAAC	GGTGGGTGTGCCCAAACTGG	ACSM5_+_20420690.23-P1P2|ACSM5_+_20420687.23-P1P2
ACSS1	P1P2	ACSS1_+_25038989.23-P1P2	ACSS1_+_25038797.23-P1P2	predicted	predicted	GGAGCGCAGCGCCTGGGCCA	GGGGCCCGCGGAGACTCCAC	ACSS1_+_25038989.23-P1P2|ACSS1_+_25038797.23-P1P2
ACSS2	P1P2	ACSS2_+_33464215.23-P1P2	ACSS2_+_33464256.23-P1P2	predicted	predicted	GAGGAAAAGTCGAGGGATAG	GGTTGGGGAGGGATCGAGGT	ACSS2_+_33464215.23-P1P2|ACSS2_+_33464256.23-P1P2
ACSS3	P1P2	ACSS3_-_81471638.23-P1P2	ACSS3_+_81471706.23-P1P2	predicted	predicted	GGGGTTGGAAGTGCATGTTG	GAGAAGCAACAGGCTAAAGT	ACSS3_-_81471638.23-P1P2|ACSS3_+_81471706.23-P1P2
ACTA1	P1	ACTA1_+_229570073.23-P1	ACTA1_-_229570127.23-P1	predicted	predicted	GCAGGAGGGGCAAACCCGCT	GTTGCCCGCCGGAGGGGATG	ACTA1_+_229570073.23-P1|ACTA1_-_229570127.23-P1
ACTA1	P2	ACTA1_-_229568940.23-P2	ACTA1_-_229568950.23-P2	predicted	predicted	GGAAGTCTCAGCGGCAGGGG	GCGGCAGGGGGGGGTAAGCC	ACTA1_-_229568940.23-P2|ACTA1_-_229568950.23-P2
ACTA2	P1	ACTA2_-_90712823.23-P1	ACTA2_+_90712849.23-P1	predicted	predicted	GGACACTGAGCTAGGGTAAT	GAGCAAGCTGGCATCCTCTG	ACTA2_-_90712823.23-P1|ACTA2_+_90712849.23-P1
ACTA2	P2	ACTA2_-_90751240.23-P2	ACTA2_-_90751135.23-P2	predicted	predicted	GAAGCAGTGGTTAAGCCGGA	GTGAGTgcgcgccgccccgc	ACTA2_-_90751240.23-P2|ACTA2_-_90751135.23-P2
ACTB	P1P2	ACTB_-_5569404.23-P1P2	ACTB_+_5569498.23-P1P2	predicted	predicted	GccggcgcgcgcccAGATTG	GCTGGCGCCCGGTTGGGAGG	ACTB_-_5569404.23-P1P2|ACTB_+_5569498.23-P1P2
ACTBL2	P1P2	ACTBL2_+_56778841.23-P1P2	ACTBL2_-_56778900.23-P1P2	predicted	predicted	GCAGGCTGACGGTCATGTGT	GGATAACTATGATGATGCAG	ACTBL2_+_56778841.23-P1P2|ACTBL2_-_56778900.23-P1P2
ACTC1	P1P2	ACTC1_-_35088013.23-P1P2	ACTC1_-_35087685.23-P1P2	predicted	predicted	GGGGAGGGGCAGGCGCTGAA	GACCAGGCGAGGAGTGAACG	ACTC1_-_35088013.23-P1P2|ACTC1_-_35087685.23-P1P2
ACTG1	P1P2	ACTG1_-_79480159.23-P1P2	ACTG1_-_79479971.23-P1P2	predicted	predicted	GGACTGCCGCGCCGTGGGGA	GCCGCCGGGCAGGGACACGT	ACTG1_-_79480159.23-P1P2|ACTG1_-_79479971.23-P1P2
ACTG2	P1	ACTG2_+_74119986.23-P1	ACTG2_-_74119864.23-P1	predicted	predicted	GTCGCCTTGGGGGTAGGGAA	GTCACTCTGGGCAGCTTATA	ACTG2_+_74119986.23-P1|ACTG2_-_74119864.23-P1
ACTG2	P2	ACTG2_-_74128095.23-P2	ACTG2_-_74128271.23-P2	predicted	predicted	Gtgtactggagtagtcatac	GTCAACTGCCAGTGAGTGGG	ACTG2_-_74128095.23-P2|ACTG2_-_74128271.23-P2
ACTL10	P1P2	ACTL10_+_32254588.23-P1P2	ACTL10_+_32254401.23-P1P2	predicted	predicted	GCAGGCTTCAGTCTCCGCTC	GGGGAGGAGCAGAACTTTGA	ACTL10_+_32254588.23-P1P2|ACTL10_+_32254401.23-P1P2
ACTL6A	P1P2	ACTL6A_-_179280694.23-P1P2	ACTL6A_+_179280551.23-P1P2	predicted	predicted	GAGGCCTGGACCCTAGTGAT	GCAGCAGGACAGAAGGAGTT	ACTL6A_-_179280694.23-P1P2|ACTL6A_+_179280551.23-P1P2
ACTL6B	P1P2	ACTL6B_-_100254170.23-P1P2	ACTL6B_+_100254113.23-P1P2	predicted	predicted	GGGGGGCAGCTGCTTTAAAG	GTCGCCTGGCAGCCAATCGG	ACTL6B_-_100254170.23-P1P2|ACTL6B_+_100254113.23-P1P2
ACTL7A	P1P2	ACTL7A_-_111624446.23-P1P2	ACTL7A_-_111624041.23-P1P2	predicted	predicted	GGTACCCTAACACAGGATAA	Gaacaagccggggaccggat	ACTL7A_-_111624446.23-P1P2|ACTL7A_-_111624041.23-P1P2
ACTL7B	P1P2	ACTL7B_+_111618481.23-P1P2	ACTL7B_+_111618497.23-P1P2	predicted	predicted	GGTTAGGCATGGAAATGCAA	GGTCCAGTAGTGAACAGGTT	ACTL7B_+_111618481.23-P1P2|ACTL7B_+_111618497.23-P1P2
ACTL8	P1P2	ACTL8_+_18081686.23-P1P2	ACTL8_-_18081800.23-P1P2	predicted	predicted	Gtttaccaagcaggcaagaa	Ggggagccccagcagcgggg	ACTL8_+_18081686.23-P1P2|ACTL8_-_18081800.23-P1P2
ACTL9	P1P2	ACTL9_-_8809364.23-P1P2	ACTL9_-_8809229.23-P1P2	predicted	predicted	Ggcgctagaagctaatacga	GACAATGCAGCCAAGAGGAT	ACTL9_-_8809364.23-P1P2|ACTL9_-_8809229.23-P1P2
ACTN1	P1P2	ACTN1_-_69446192.23-P1P2	ACTN1_+_69446084.23-P1P2	predicted	predicted	GGGGCTGCGGCGCATATAGG	GCCAATGGAGAGCCTCGGGA	ACTN1_-_69446192.23-P1P2|ACTN1_+_69446084.23-P1P2
ACTN2	P1P2	ACTN2_+_236849657.23-P1P2	ACTN2_+_236849571.23-P1P2	predicted	predicted	GAGCACGTGCGGGCGGACAA	GGAGGCCTCCGGGAACGTGA	ACTN2_+_236849657.23-P1P2|ACTN2_+_236849571.23-P1P2
ACTN3	P1P2	ACTN3_+_66313498.23-P1P2	ACTN3_+_66314192.23-P1P2	predicted	predicted	GCGGAAGCGGCCTAGTCCTC	GGGCGCCGGGGtggatctcg	ACTN3_+_66313498.23-P1P2|ACTN3_+_66314192.23-P1P2
ACTN4	P1P2	ACTN4_-_39138134.23-P1P2	ACTN4_-_39138303.23-P1P2	predicted	predicted	GGCCCCCGGGCTGAGTCGGG	Gcgggctgaagcagctgaag	ACTN4_-_39138134.23-P1P2|ACTN4_-_39138303.23-P1P2
ACTR10	P1P2	ACTR10_+_58666685.23-P1P2	ACTR10_+_58666571.23-P1P2	predicted	predicted	GGGCGCGAATCCGAGTGCGG	GCCCACGCGCGGCTGTGAAG	ACTR10_+_58666685.23-P1P2|ACTR10_+_58666571.23-P1P2
ACTR1A	P1P2	ACTR1A_+_104262651.23-P1P2	ACTR1A_-_104262499.23-P1P2	predicted	predicted	GTCTCTGGCTGTTTAATCTA	GCAGTCTAGCCGCCGGTTCA	ACTR1A_+_104262651.23-P1P2|ACTR1A_-_104262499.23-P1P2
ACTR1B	P1P2	ACTR1B_+_98280525.23-P1P2	ACTR1B_-_98280511.23-P1P2	predicted	predicted	GGCCAGGTGGGAGCGATGAT	GGCCCCGCGGGGCTTTCTGG	ACTR1B_+_98280525.23-P1P2|ACTR1B_-_98280511.23-P1P2
ACTR2	P1P2	ACTR2_+_65454802.23-P1P2	ACTR2_+_65454835.23-P1P2	predicted	predicted	GAAAAGATGGAGGAGCGTCG	GCAGGCAGCGCGACTGGCAG	ACTR2_+_65454802.23-P1P2|ACTR2_+_65454835.23-P1P2
ACTR3	P1P2	ACTR3_-_114647560.23-P1P2	ACTR3_-_114647582.23-P1P2	predicted	predicted	GTTGGCTTCCCggggaaagg	Gcgtgaggggaagaagttgt	ACTR3_-_114647560.23-P1P2|ACTR3_-_114647582.23-P1P2
ACTR3B	P1P2	ACTR3B_-_152456707.23-P1P2	ACTR3B_-_152456798.23-P1P2	predicted	predicted	GCAGCAAGGTTGGACGTATG	GGGCGTGCGCGCGTTCTGAT	ACTR3B_-_152456707.23-P1P2|ACTR3B_-_152456798.23-P1P2
ACTR3C	P1P2	ACTR3C_-_150020762.23-P1P2	ACTR3C_-_150020731.23-P1P2	predicted	predicted	GCCCTCGCGCCGAAACACAC	GCCCCGGGGGGCCACCTGCT	ACTR3C_-_150020762.23-P1P2|ACTR3C_-_150020731.23-P1P2
ACTR5	P1P2	ACTR5_-_37376878.23-P1P2	ACTR5_-_37376861.23-P1P2	predicted	predicted	GAAGGGGCGTGGGCACTCAT	GGCGTCCCGGCTAGAGTGAA	ACTR5_-_37376878.23-P1P2|ACTR5_-_37376861.23-P1P2
ACTR6	P1P2	ACTR6_-_100594587.23-P1P2	ACTR6_-_100594606.23-P1P2	predicted	predicted	GAAAGCTCGAGCAGAGGGGT	GCGGAAAGGGAAAACAACTA	ACTR6_-_100594587.23-P1P2|ACTR6_-_100594606.23-P1P2
ACTR8	P1P2	ACTR8_-_53916259.23-P1P2	ACTR8_-_53916235.23-P1P2	predicted	predicted	GGCCGCGGAGTCGCCCCAGA	GCGGCTGCCCACAGTCAAGA	ACTR8_-_53916259.23-P1P2|ACTR8_-_53916235.23-P1P2
ACTRT1	P1P2	ACTRT1_+_127186497.23-P1P2	ACTRT1_+_127186748.23-P1P2	predicted	predicted	GACCAAGTAGGGAGTACTAT	Gtagaagcatgtggagaagt	ACTRT1_+_127186497.23-P1P2|ACTRT1_+_127186748.23-P1P2
ACTRT2	P1P2	ACTRT2_+_2937777.23-P1P2	ACTRT2_-_2937822.23-P1P2	predicted	predicted	GCCCTGAGCTGCAACTTCTG	GCAGAGAAGCTGGTTTTCTA	ACTRT2_+_2937777.23-P1P2|ACTRT2_-_2937822.23-P1P2
ACTRT3	P1P2	ACTRT3_-_169487479.23-P1P2	ACTRT3_+_169487502.23-P1P2	predicted	predicted	GCCCAGGCGGAAGGACTCGC	GTGCGAGAAGCAATAGCGGG	ACTRT3_-_169487479.23-P1P2|ACTRT3_+_169487502.23-P1P2
ACVR1	P1P2	ACVR1_-_158732701.23-P1P2	ACVR1_-_158732742.23-P1P2	predicted	predicted	GTCCCGAGGCGCAGAGGCTC	GCGGGGCGGGCGGACCAGCT	ACVR1_-_158732701.23-P1P2|ACVR1_-_158732742.23-P1P2
ACVR1B	P1P2	ACVR1B_-_52345222.23-P1P2	ACVR1B_+_52345310.23-P1P2	predicted	predicted	GAGGGAGGAGACTGCACGTT	GcgcgggcgcccgccTTAAA	ACVR1B_-_52345222.23-P1P2|ACVR1B_+_52345310.23-P1P2
ACVR1C	P1P2	ACVR1C_+_158485575.23-P1P2	ACVR1C_+_158485452.23-P1P2	predicted	predicted	GCCTGAGTATCTAGTCCCGG	GGGCCCGGGCGGCTGCGAGA	ACVR1C_+_158485575.23-P1P2|ACVR1C_+_158485452.23-P1P2
ACVR2A	P1P2	ACVR2A_+_148601913.23-P1P2	ACVR2A_+_148601921.23-P1P2	predicted	predicted	Gggagattgtcggggaagcg	GGagcgcgaggagattgtcg	ACVR2A_+_148601913.23-P1P2|ACVR2A_+_148601921.23-P1P2
ACVR2B	P1P2	ACVR2B_-_38494967.23-P1P2	ACVR2B_-_38495034.23-P1P2	predicted	predicted	GTAGAGATCCGACTTTCCCA	GGGCGTCTGGGCCAGAGTCC	ACVR2B_-_38494967.23-P1P2|ACVR2B_-_38495034.23-P1P2
ACVRL1	P1P2	ACVRL1_+_52300550.23-P1P2	ACVRL1_-_52300556.23-P1P2	predicted	predicted	GCAGGGGTATACAGGCCCAG	GCTAACCCAAGGCCGTCCTC	ACVRL1_+_52300550.23-P1P2|ACVRL1_-_52300556.23-P1P2
ACY1	P1P2	ACY1_-_52017189.23-P1P2	ACY1_-_52017221.23-P1P2	predicted	predicted	GAGGAGGCGCCCTTAGGGGA	GAGCTCCCGGCGCATACCTG	ACY1_-_52017189.23-P1P2|ACY1_-_52017221.23-P1P2
ACY3	P1	ACY3_-_67418366.23-P1	ACY3_+_67418355.23-P1	predicted	predicted	GCCAAGGGCAACCCGGATCC	GCTACCCAGATCCGGGATCC	ACY3_-_67418366.23-P1|ACY3_+_67418355.23-P1
ACY3	P2	ACY3_+_67415189.23-P2	ACY3_+_67415185.23-P2	predicted	predicted	GGCAGCACAAGTAGCAGCGT	GCACAAGTAGCAGCGTGGGG	ACY3_+_67415189.23-P2|ACY3_+_67415185.23-P2
ACYP1	P1	ACYP1_-_75530843.23-P1	ACYP1_-_75530857.23-P1	predicted	predicted	GCCGGGCCCGCCCAGAAGGT	GAAGGTGGGATTTCAGGACG	ACYP1_-_75530843.23-P1|ACYP1_-_75530857.23-P1
ACYP1	P2	ACYP1_-_75536388.23-P2	ACYP1_+_75536273.23-P2	predicted	predicted	GCGGCTGTCGGTTGATGGGG	GCCCTCGCCGCGAACTCCTC	ACYP1_-_75536388.23-P2|ACYP1_+_75536273.23-P2
ACYP2	P1P2	ACYP2_+_54342625.23-P1P2	ACYP2_-_54342600.23-P1P2	predicted	predicted	GGCAGCCGGGGACGCCAGGA	GAGTCCGGGAAGAGAGGCCT	ACYP2_+_54342625.23-P1P2|ACYP2_-_54342600.23-P1P2
ADA	P1P2	ADA_+_43280537.23-P1P2	ADA_+_43280527.23-P1P2	predicted	predicted	GGGAGCGCGCGCCCACAGGT	GCCCACAGGTGGGTCCGGTC	ADA_+_43280537.23-P1P2|ADA_+_43280527.23-P1P2
ADAD1	P1P2	ADAD1_-_123300395.23-P1P2	ADAD1_-_123300392.23-P1P2	predicted	predicted	GGGGCACGGGACAGTAAGGG	GGGGGGGCACGGGACAGTAA	ADAD1_-_123300395.23-P1P2|ADAD1_-_123300392.23-P1P2
ADAD2	P1P2	ADAD2_+_84224628.23-P1P2	ADAD2_+_84224674.23-P1P2	predicted	predicted	GGCCAGTCTCCCAACGACGG	GAGAGCCCTGAGATCTGTGA	ADAD2_+_84224628.23-P1P2|ADAD2_+_84224674.23-P1P2
ADAL	P1P2	ADAL_+_43622733.23-P1P2	ADAL_+_43622523.23-P1P2	predicted	predicted	GGAGGTGTGTGCTAACCAAG	GGCGCACCGCTCATTCACCG	ADAL_+_43622733.23-P1P2|ADAL_+_43622523.23-P1P2
ADAM10	P1P2	ADAM10_+_59042238.23-P1P2	ADAM10_+_59042152.23-P1P2	predicted	predicted	GTAGGAGCGCTCCCGCCCCG	GGCGGCAGGCCTAGCAGCAC	ADAM10_+_59042238.23-P1P2|ADAM10_+_59042152.23-P1P2
ADAM11	P1P2	ADAM11_-_42836178.23-P1P2	ADAM11_+_42836074.23-P1P2	predicted	predicted	GAGGCCGCGGGATAAGTACG	GAGGGGACGGGGTACCCCCG	ADAM11_-_42836178.23-P1P2|ADAM11_+_42836074.23-P1P2
ADAM12	P1P2	ADAM12_-_128077220.23-P1P2	ADAM12_-_128077202.23-P1P2	predicted	predicted	GAGGGTGGGCGGCTCAGACG	GGCGGCTCGCTCACCCCCGA	ADAM12_-_128077220.23-P1P2|ADAM12_-_128077202.23-P1P2
ADAM15	P1P2	ADAM15_-_155023648.23-P1P2	ADAM15_-_155023538.23-P1P2	predicted	predicted	GTGAGCAGCGCGGGCGTAGT	GAAGCTACTAGGGAGGGGTC	ADAM15_-_155023648.23-P1P2|ADAM15_-_155023538.23-P1P2
ADAM17	P1P2	ADAM17_+_9696057.23-P1P2	ADAM17_+_9696028.23-P1P2	predicted	predicted	GGCGGGGCCGAACACGGCAG	GGCCCGCGGCGCACCGGCGT	ADAM17_+_9696057.23-P1P2|ADAM17_+_9696028.23-P1P2
ADAM18	P1P2	ADAM18_+_39441960.23-P1P2	ADAM18_+_39442042.23-P1P2	predicted	predicted	GCACTTCCGCAGGGCGGGGA	GCCACCGGGCGCCTGGGCCA	ADAM18_+_39441960.23-P1P2|ADAM18_+_39442042.23-P1P2
ADAM19	P1P2	ADAM19_-_157002947.23-P1P2	ADAM19_+_157002997.23-P1P2	predicted	predicted	GAGGAGCTGGCGAGACTCGG	GACAAATCCCTCCTCCTGGG	ADAM19_-_157002947.23-P1P2|ADAM19_+_157002997.23-P1P2
ADAM2	P1P2	ADAM2_-_39695904.23-P1P2	ADAM2_-_39695783.23-P1P2	predicted	predicted	GTGCAGGACAAGCACTCCAC	GGAAGCGCGAGATGACGCCC	ADAM2_-_39695904.23-P1P2|ADAM2_-_39695783.23-P1P2
ADAM20	P1P2	ADAM20_-_71001989.23-P1P2	ADAM20_+_71002211.23-P1P2	predicted	predicted	GTCAAACAGGGAGCTTATAA	Gtcactagtaaaggagacta	ADAM20_-_71001989.23-P1P2|ADAM20_+_71002211.23-P1P2
ADAM21	P1P2	ADAM21_+_70918673.23-P1P2	ADAM21_-_70918757.23-P1P2	predicted	predicted	GCTATGTCCCCTGACAGCAC	GTCGGAAGTGAGTATAGAAA	ADAM21_+_70918673.23-P1P2|ADAM21_-_70918757.23-P1P2
ADAM22	P1P2	ADAM22_+_87563470.23-P1P2	ADAM22_-_87563446.23-P1P2	predicted	predicted	GCGGGCGACAAGAGCTCGGC	GCGCCCTTGCCTGCGCGCGG	ADAM22_+_87563470.23-P1P2|ADAM22_-_87563446.23-P1P2
ADAM23	P1P2	ADAM23_-_207308155.23-P1P2	ADAM23_+_207308008.23-P1P2	predicted	predicted	GAGCACCCGAAGCCCCGCTC	GGCAGCCCAAGCAGCATCGG	ADAM23_-_207308155.23-P1P2|ADAM23_+_207308008.23-P1P2
ADAM28	P1P2	ADAM28_-_24151406.23-P1P2	ADAM28_-_24151399.23-P1P2	predicted	predicted	GTACTTTGGAGTGGGGAGTA	GAATGTACTACTTTGGAGTG	ADAM28_-_24151406.23-P1P2|ADAM28_-_24151399.23-P1P2
ADAM29	P1P2	ADAM29_-_175839213.23-P1P2	ADAM29_-_175839411.23-P1P2	predicted	predicted	GTTACAGCTAGGAAACAAAA	GCTGGGACTGAATAACTATC	ADAM29_-_175839213.23-P1P2|ADAM29_-_175839411.23-P1P2
ADAM30	P1P2	ADAM30_-_120439268.23-P1P2	ADAM30_-_120439284.23-P1P2	predicted	predicted	GGGCACGTGGGTTGGAGAGA	GAGAGGGTAGAGAACACCAT	ADAM30_-_120439268.23-P1P2|ADAM30_-_120439284.23-P1P2
ADAM32	P1P2	ADAM32_-_38965005.23-P1P2	ADAM32_-_38965088.23-P1P2	predicted	predicted	GACACAAAGCGAAAAGTTAG	GGGCTGGGGTGCGCCGGGAA	ADAM32_-_38965005.23-P1P2|ADAM32_-_38965088.23-P1P2
ADAM33	P1P2	ADAM33_-_3662900.23-P1P2	ADAM33_+_3662873.23-P1P2	predicted	predicted	GCCGGACCGCCGCCCCTCGA	GAGGGGCGGCGGTCCGGGAG	ADAM33_-_3662900.23-P1P2|ADAM33_+_3662873.23-P1P2
ADAM7	P1P2	ADAM7_+_24298390.23-P1P2	ADAM7_+_24298393.23-P1P2	predicted	predicted	GACAACTACCGAGGTGGTGG	GAAGACAACTACCGAGGTGG	ADAM7_+_24298390.23-P1P2|ADAM7_+_24298393.23-P1P2
ADAM8	P1P2	ADAM8_-_135090584.23-P1P2	ADAM8_+_135090502.23-P1P2	predicted	predicted	GCCGGCCAGAGCCCCGAGAG	GagggaggatGCTGGATTGT	ADAM8_-_135090584.23-P1P2|ADAM8_+_135090502.23-P1P2
ADAM9	P1P2	ADAM9_+_38854250.23-P1P2	ADAM9_-_38854303.23-P1P2	predicted	predicted	GGCCGGGCACGCCCACCTAG	GGCGGGGCGGATATGACTGG	ADAM9_+_38854250.23-P1P2|ADAM9_-_38854303.23-P1P2
ADAMDEC1	P1P2	ADAMDEC1_-_24241979.23-P1P2	ADAMDEC1_+_24241734.23-P1P2	predicted	predicted	GTCAACTTCTAAAGAGAAAT	GGTGTGAACTGAGACTGAGG	ADAMDEC1_-_24241979.23-P1P2|ADAMDEC1_+_24241734.23-P1P2
ADAMTS1	P1	ADAMTS1_-_28217843.23-P1	ADAMTS1_-_28217931.23-P1	predicted	predicted	GACGCCGCCCCCGGCTCCGT	GCCACTGCTCGTCAATCTAG	ADAMTS1_-_28217843.23-P1|ADAMTS1_-_28217931.23-P1
ADAMTS1	P2	ADAMTS1_+_28216738.23-P2	ADAMTS1_-_28216744.23-P2	predicted	predicted	GGCCCCAGGGGAGAAGCCGC	GGGAACTGTAGTGGTGCCGG	ADAMTS1_+_28216738.23-P2|ADAMTS1_-_28216744.23-P2
ADAMTS10	P1P2	ADAMTS10_+_8675763.23-P1P2	ADAMTS10_-_8675816.23-P1P2	predicted	predicted	GgcggggcggcccgAGTTCC	GcgcccccgccgcgTgggag	ADAMTS10_+_8675763.23-P1P2|ADAMTS10_-_8675816.23-P1P2
ADAMTS12	P1P2	ADAMTS12_+_33892259.23-P1P2	ADAMTS12_-_33892204.23-P1P2	predicted	predicted	GAGGCCGCGGGGCATGCGGG	GACAGTGTCCGCTTTCGGCG	ADAMTS12_+_33892259.23-P1P2|ADAMTS12_-_33892204.23-P1P2
ADAMTS13	P1P2	ADAMTS13_+_136287270.23-P1P2	ADAMTS13_+_136287335.23-P1P2	predicted	predicted	GTGCACGCCCACCCCCTTAG	GCTAAGATGGTTGCAGTTCA	ADAMTS13_+_136287270.23-P1P2|ADAMTS13_+_136287335.23-P1P2
ADAMTS14	P1P2	ADAMTS14_-_72431983.23-P1P2	ADAMTS14_-_72432046.23-P1P2	predicted	predicted	GAGGCCCTGCGGCCAAGAAA	GGGGATCCCAGGCGTCTGAG	ADAMTS14_-_72431983.23-P1P2|ADAMTS14_-_72432046.23-P1P2
ADAMTS15	P1P2	ADAMTS15_-_130318400.23-P1P2	ADAMTS15_+_130318365.23-P1P2	predicted	predicted	GTGGCTCTCCGCTCTGGAGG	GGAGAGCCACTTGGCGGGGA	ADAMTS15_-_130318400.23-P1P2|ADAMTS15_+_130318365.23-P1P2
ADAMTS16	P1	ADAMTS16_+_5146260.23-P1	ADAMTS16_+_5146184.23-P1	predicted	predicted	GCCCCTGTGGTCAACCTCGT	GCGGAATTCCGAGAAGAATC	ADAMTS16_+_5146260.23-P1|ADAMTS16_+_5146184.23-P1
ADAMTS16	P2	ADAMTS16_+_5140258.23-P2	ADAMTS16_+_5140247.23-P2	predicted	predicted	Gggaggaggcgaggtcagcg	Gggtcagcggggcgctgagg	ADAMTS16_+_5140258.23-P2|ADAMTS16_+_5140247.23-P2
ADAMTS17	P1P2	ADAMTS17_+_100882282.23-P1P2	ADAMTS17_+_100882313.23-P1P2	predicted	predicted	GGCGGGGCGGAGGAAAGCGA	GCGACCCATCCCAACCAGTA	ADAMTS17_+_100882282.23-P1P2|ADAMTS17_+_100882313.23-P1P2
ADAMTS18	P1P2	ADAMTS18_-_77469131.23-P1P2	ADAMTS18_-_77469158.23-P1P2	predicted	predicted	Gaggctgggtgggagtgata	GgggaCCGACCGCCATGAGA	ADAMTS18_-_77469131.23-P1P2|ADAMTS18_-_77469158.23-P1P2
ADAMTS19	P1P2	ADAMTS19_-_128795831.23-P1P2	ADAMTS19_+_128795479.23-P1P2	predicted	predicted	GAATTCGCCAGGGAGCTCGA	GAGGGAATGAGTAGGGAGAT	ADAMTS19_-_128795831.23-P1P2|ADAMTS19_+_128795479.23-P1P2
ADAMTS2	P1P2	ADAMTS2_+_178772602.23-P1P2	ADAMTS2_+_178772627.23-P1P2	predicted	predicted	GcggccgcgccAAGATGCGC	GCGAAGAGGGAAgcgggcgg	ADAMTS2_+_178772602.23-P1P2|ADAMTS2_+_178772627.23-P1P2
ADAMTS20	P1P2	ADAMTS20_+_43946158.23-P1P2	ADAMTS20_+_43946140.23-P1P2	predicted	predicted	GGGGTACCGCAGTCCCCTTG	GGCGGCTGAGTGGAGAAGGG	ADAMTS20_+_43946158.23-P1P2|ADAMTS20_+_43946140.23-P1P2
ADAMTS3	P1P2	ADAMTS3_-_73435106.23-P1P2	ADAMTS3_-_73435277.23-P1P2	predicted	predicted	GGACCCGCGGGGCGCTAATA	GTCCGCCTAGGGCGAGAGGA	ADAMTS3_-_73435106.23-P1P2|ADAMTS3_-_73435277.23-P1P2
ADAMTS4	P1P2	ADAMTS4_+_161169086.23-P1P2	ADAMTS4_-_161168987.23-P1P2	predicted	predicted	GGGGCTCTGTCCCACCAAAA	GAAAAATGGGACTTGCCCAG	ADAMTS4_+_161169086.23-P1P2|ADAMTS4_-_161168987.23-P1P2
ADAMTS5	P1P2	ADAMTS5_-_28339556.23-P1P2	ADAMTS5_-_28339588.23-P1P2	predicted	predicted	GTCCGCGCCTAATCAGATGG	GAGGAGGGTGATCGAGGAAA	ADAMTS5_-_28339556.23-P1P2|ADAMTS5_-_28339588.23-P1P2
ADAMTS6	P1P2	ADAMTS6_-_64777841.23-P1P2	ADAMTS6_-_64777782.23-P1P2	predicted	predicted	GGGAGGTAGAGGTACAATCG	GGATGTGCCTGGGCTGCGTC	ADAMTS6_-_64777841.23-P1P2|ADAMTS6_-_64777782.23-P1P2
ADAMTS7	P1P2	ADAMTS7_-_79103944.23-P1P2	ADAMTS7_-_79103979.23-P1P2	predicted	predicted	GCAGGCCGTGCTCGCCTCAA	GCGCAGGCAGCGCCCCGCAA	ADAMTS7_-_79103944.23-P1P2|ADAMTS7_-_79103979.23-P1P2
ADAMTS8	P1P2	ADAMTS8_-_130298510.23-P1P2	ADAMTS8_+_130298583.23-P1P2	predicted	predicted	GACCCCGGGAAGCACCGAGT	GATCCCAGGGGAGGGGAAAC	ADAMTS8_-_130298510.23-P1P2|ADAMTS8_+_130298583.23-P1P2
ADAMTS9	P1P2	ADAMTS9_+_64674082.23-P1P2	ADAMTS9_+_64673830.23-P1P2	predicted	predicted	GAGGAAAAAGAGACTCGgaa	GCCGAGGAGGGGACATGGTC	ADAMTS9_+_64674082.23-P1P2|ADAMTS9_+_64673830.23-P1P2
ADAMTSL1	P1P2	ADAMTSL1_+_18473939.23-P1P2	ADAMTSL1_+_18474015.23-P1P2	predicted	predicted	GACGGTGCGAGCAAAAAAGG	GAGCAGGCAGCCAGCCAATC	ADAMTSL1_+_18473939.23-P1P2|ADAMTSL1_+_18474015.23-P1P2
ADAMTSL2	P1P2	ADAMTSL2_+_136399591.23-P1P2	ADAMTSL2_+_136399605.23-P1P2	predicted	predicted	GTTCCCGGGTCCAGAACTGG	GGCAGGGAGGCCTTCTTCCC	ADAMTSL2_+_136399591.23-P1P2|ADAMTSL2_+_136399605.23-P1P2
ADAMTSL3	P1P2	ADAMTSL3_-_84322684.23-P1P2	ADAMTSL3_-_84322711.23-P1P2	predicted	predicted	GCGCCTCCAGCTCAAGCCGA	GTGCCGGCGCGCAGGCTGAC	ADAMTSL3_-_84322684.23-P1P2|ADAMTSL3_-_84322711.23-P1P2
ADAMTSL4	P1P2	ADAMTSL4_+_150521588.23-P1P2	ADAMTSL4_-_150521778.23-P1P2	predicted	predicted	GGGACTTAAGCAGCCCGGGC	GAGGCAGACCGGCCCCACCC	ADAMTSL4_+_150521588.23-P1P2|ADAMTSL4_-_150521778.23-P1P2
ADAMTSL5	P1P2	ADAMTSL5_-_1513160.23-P1P2	ADAMTSL5_-_1513165.23-P1P2	predicted	predicted	GcgcggcgggcgcggATCTG	GcgggcgcggATCTGCGGCA	ADAMTSL5_-_1513160.23-P1P2|ADAMTSL5_-_1513165.23-P1P2
ADAP1	P1P2	ADAP1_+_994494.23-P1P2	ADAP1_+_994282.23-P1P2	predicted	predicted	GGCCTCGCGCCCAGGCAGGT	GACCGCGGCGGAGACACGAG	ADAP1_+_994494.23-P1P2|ADAP1_+_994282.23-P1P2
ADAP2	P1P2	ADAP2_+_29248840.23-P1P2	ADAP2_+_29248821.23-P1P2	predicted	predicted	GCTCCGCCGACGCGCGGGGa	Ggggacaggagcacgcaaat	ADAP2_+_29248840.23-P1P2|ADAP2_+_29248821.23-P1P2
ADAR	P1	ADAR_+_154580757.23-P1	ADAR_-_154580756.23-P1	predicted	predicted	GGAGGGGTTCGACTTGTAAC	GTTGCGCCACGCTTGGTTTC	ADAR_+_154580757.23-P1|ADAR_-_154580756.23-P1
ADAR	P2	ADAR_-_154600624.23-P2	ADAR_-_154600716.23-P2	predicted	predicted	GCAGTGGGGAGTAGGTACAT	GAAGGCCTGAGAAGATACGT	ADAR_-_154600624.23-P2|ADAR_-_154600716.23-P2
ADARB1	P1P2	ADARB1_+_46494364.23-P1P2	ADARB1_-_46494343.23-P1P2	predicted	predicted	GGGGCGCCCGTGTCTGTCGT	GCCGCCGCAGGTGGTCGTGA	ADARB1_+_46494364.23-P1P2|ADARB1_-_46494343.23-P1P2
ADARB2	ENST00000381312.1	ADARB2_-_1779914.23-ENST00000381312.1	ADARB2_-_1779920.23-ENST00000381312.1	predicted	predicted	GAGGCTGCTCCCGGGGAACA	GCTCCCGGGGAACAAGGACG	ADARB2_-_1779914.23-ENST00000381312.1|ADARB2_-_1779920.23-ENST00000381312.1
ADAT1	P1P2	ADAT1_-_75657270.23-P1P2	ADAT1_-_75657346.23-P1P2	predicted	predicted	GGGGCCCTGTAGTTTTTCCG	GTCTTAGAGAGGCGTGAAAC	ADAT1_-_75657270.23-P1P2|ADAT1_-_75657346.23-P1P2
ADAT2	P1P2	ADAT2_-_143772036.23-P1P2	ADAT2_+_143772007.23-P1P2	predicted	predicted	GGCTCCGGTGACAGTCTCTG	GACTGTCACCGGAGCGGCAA	ADAT2_-_143772036.23-P1P2|ADAT2_+_143772007.23-P1P2
ADAT3	P1	ADAT3_+_1905191.23-P1	ADAT3_+_1905329.23-P1	predicted	predicted	GGACCTCCGGGCGGCGGGAG	GTGGAGCCGCGGAGCACGAC	ADAT3_+_1905191.23-P1|ADAT3_+_1905329.23-P1
ADAT3	P2	ADAT3_+_1907846.23-P2	ADAT3_-_1907872.23-P2	predicted	predicted	GCTACCTGCTATGGCCCGGG	GCGGGCCATAGCAGGTAGGT	ADAT3_+_1907846.23-P2|ADAT3_-_1907872.23-P2
ADC	P1P2	ADC_-_33546604.23-P1P2	ADC_-_33546583.23-P1P2	predicted	predicted	GGGGGAGAAGACTACAGTAA	GGTAGCCACCGCCAGGCCTC	ADC_-_33546604.23-P1P2|ADC_-_33546583.23-P1P2
ADCK1	P1P2	ADCK1_+_78266316.23-P1P2	ADCK1_-_78266298.23-P1P2	predicted	predicted	GGTGGAGGCACAGGGGTCTC	GTCGCCCTGGCAAAGCAACA	ADCK1_+_78266316.23-P1P2|ADCK1_-_78266298.23-P1P2
ADCK2	P1P2	ADCK2_+_140372664.23-P1P2	ADCK2_+_140372574.23-P1P2	predicted	predicted	Gagggcgggcggagcgtcgg	Gaggggcgcgggagatggat	ADCK2_+_140372664.23-P1P2|ADCK2_+_140372574.23-P1P2
ADCK3	P1P2	ADCK3_-_227127783.23-P1P2	ADCK3_-_227127810.23-P1P2	predicted	predicted	GTAGCCGGGAGGTGGGGAAA	GAGGAGGGCCCTGTCCGCTA	ADCK3_-_227127783.23-P1P2|ADCK3_-_227127810.23-P1P2
ADCK4	P1P2	ADCK4_-_41222994.23-P1P2	ADCK4_-_41222924.23-P1P2	predicted	predicted	GACCCCTCGCGGGATTTAAA	GTAACCCTTGCGCGGCGGGG	ADCK4_-_41222994.23-P1P2|ADCK4_-_41222924.23-P1P2
ADCK5	P1P2	ADCK5_-_145597531.23-P1P2	ADCK5_+_145597451.23-P1P2	predicted	predicted	GGGAATGCGCAGTGCGCCGA	GCACGTGGATAATCCGGGGA	ADCK5_-_145597531.23-P1P2|ADCK5_+_145597451.23-P1P2
ADCY1	P1P2	ADCY1_+_45613903.23-P1P2	ADCY1_+_45613906.23-P1P2	predicted	predicted	GCCCCGACCGTGGTCCTCGG	GGCGCCCCGACCGTGGTCCT	ADCY1_+_45613903.23-P1P2|ADCY1_+_45613906.23-P1P2
ADCY10	P1P2	ADCY10_+_167883527.23-P1P2	ADCY10_+_167883463.23-P1P2	predicted	predicted	GGACCCTTGCCTCAAATGTG	GAGGCCACTCAGGTTGGTGG	ADCY10_+_167883527.23-P1P2|ADCY10_+_167883463.23-P1P2
ADCY2	P1P2	ADCY2_-_7396107.23-P1P2	ADCY2_+_7396027.23-P1P2	predicted	predicted	GACCGCCCCTGCACGGAggc	GACGGCGGGGGCTGTACGGT	ADCY2_-_7396107.23-P1P2|ADCY2_+_7396027.23-P1P2
ADCY3	P1P2	ADCY3_+_25143176.23-P1P2	ADCY3_-_25143213.23-P1P2	predicted	predicted	GCCGGAACGCGCCGCCGAGA	GTTCCGGAGTGGGGCGGCGA	ADCY3_+_25143176.23-P1P2|ADCY3_-_25143213.23-P1P2
ADCY4	P1P2	ADCY4_+_24804429.23-P1P2	ADCY4_-_24804470.23-P1P2	predicted	predicted	GCCCTGAAGGGGCTGAAGCG	GGGAAGGGCAATGTGGACCC	ADCY4_+_24804429.23-P1P2|ADCY4_-_24804470.23-P1P2
ADCY5	P1P2	ADCY5_+_123168814.23-P1P2	ADCY5_+_123168739.23-P1P2	predicted	predicted	GCGGCTCCTAGTCCCAGGGA	GAGGCCTGAGGATGCCCgcg	ADCY5_+_123168814.23-P1P2|ADCY5_+_123168739.23-P1P2
ADCY6	P1P2	ADCY6_+_49182960.23-P1P2	ADCY6_+_49182963.23-P1P2	predicted	predicted	GTCGGCCCCCACTTCTGGGG	GAACTCGGCCCCCACTTCTG	ADCY6_+_49182960.23-P1P2|ADCY6_+_49182963.23-P1P2
ADCY7	P1P2	ADCY7_-_50300370.23-P1P2	ADCY7_-_50300345.23-P1P2	predicted	predicted	GGGGCCCTGCACACCCCGAG	GAGAGCAGCACTGTGGCTGG	ADCY7_-_50300370.23-P1P2|ADCY7_-_50300345.23-P1P2
ADCY8	P1P2	ADCY8_-_132053243.23-P1P2	ADCY8_-_132053248.23-P1P2	predicted	predicted	GgggCGCCCCGCGACAGGGT	GCCCCGCGACAGGGTTGGAG	ADCY8_-_132053243.23-P1P2|ADCY8_-_132053248.23-P1P2
ADCY9	P1P2	ADCY9_+_4166522.23-P1P2	ADCY9_+_4166644.23-P1P2	predicted	predicted	Gcggcccgtgcgcgtgtccg	GACAGCCCGCCGCCTAGAAg	ADCY9_+_4166522.23-P1P2|ADCY9_+_4166644.23-P1P2
ADCYAP1	P1P2	ADCYAP1_-_904253.23-P1P2	ADCYAP1_+_904836.23-P1P2	predicted	predicted	GTATGAGAAGTCGATGACTC	GTAGACGCGCAGAACCAGGA	ADCYAP1_-_904253.23-P1P2|ADCYAP1_+_904836.23-P1P2
ADCYAP1R1	P1P2	ADCYAP1R1_+_31091828.23-P1P2	ADCYAP1R1_+_31091848.23-P1P2	predicted	predicted	GGGCGGGGTTAGATCGAGGG	GCAGGCCAATGAGCGCCCGG	ADCYAP1R1_+_31091828.23-P1P2|ADCYAP1R1_+_31091848.23-P1P2
ADD1	P1P2	ADD1_+_2845481.23-P1P2	ADD1_-_2845420.23-P1P2	predicted	predicted	GTGGCGGGACCCATGAGGGG	GCGGGACCCTGGGCCTCCGC	ADD1_+_2845481.23-P1P2|ADD1_-_2845420.23-P1P2
ADD2	P1P2	ADD2_+_70995489.23-P1P2	ADD2_+_70995540.23-P1P2	predicted	predicted	Ggggcgctgcggggcggtag	Gtggctaggggggtctgcgg	ADD2_+_70995489.23-P1P2|ADD2_+_70995540.23-P1P2
ADD3	P1P2	ADD3_-_111767627.23-P1P2	ADD3_-_111767550.23-P1P2	predicted	predicted	GGCGGGGCCAGAGGCGTAGG	GCGGGGCCAGAGAGAGCTCG	ADD3_-_111767627.23-P1P2|ADD3_-_111767550.23-P1P2
ADGB	P1P2	ADGB_+_146919935.23-P1P2	ADGB_+_146919943.23-P1P2	predicted	predicted	GGGGAGAAATCGAGGTTCTG	GGGTGTCTGGGGAGAAATCG	ADGB_+_146919935.23-P1P2|ADGB_+_146919943.23-P1P2
ADH1A	P1P2	ADH1A_+_100212424.23-P1P2	ADH1A_+_100212669.23-P1P2	predicted	predicted	GACCACTGTGGGACTAAGAG	Ggggctcagtcaatgctgat	ADH1A_+_100212424.23-P1P2|ADH1A_+_100212669.23-P1P2
ADH1B	P1P2	ADH1B_+_100242850.23-P1P2	ADH1B_+_100242642.23-P1P2	predicted	predicted	GAAGGCAGAACGACCTATGT	GGGGAATAATCCAGTGGGTG	ADH1B_+_100242850.23-P1P2|ADH1B_+_100242642.23-P1P2
ADH1C	P1P2	ADH1C_-_100274034.23-P1P2	ADH1C_+_100274179.23-P1P2	predicted	predicted	GTATCAAATCATAAAGAAAT	GAACTCTGAATGACCCCTGT	ADH1C_-_100274034.23-P1P2|ADH1C_+_100274179.23-P1P2
ADH4	P1P2	ADH4_+_100065517.23-P1P2	ADH4_+_100065590.23-P1P2	predicted	predicted	GCTGTGAATTACAGCAACAA	GGAGCTCACTGGGAGCAATG	ADH4_+_100065517.23-P1P2|ADH4_+_100065590.23-P1P2
ADH5	P1P2	ADH5_+_100010025.23-P1P2	ADH5_-_100009984.23-P1P2	predicted	predicted	GCTCGCCGGCGAGTGCACCC	GGCAATGGCTCCAACCGGAA	ADH5_+_100010025.23-P1P2|ADH5_-_100009984.23-P1P2
ADH6	P1P2	ADH6_+_100140583.23-P1P2	ADH6_+_100140565.23-P1P2	predicted	predicted	GCAAAAAAATGGATAATAAG	GGAGGGGACCTGTTTGATTA	ADH6_+_100140583.23-P1P2|ADH6_+_100140565.23-P1P2
ADH7	P1P2	ADH7_-_100356631.23-P1P2	ADH7_+_100356564.23-P1P2	predicted	predicted	GTATGATCAAACCAAGAGGA	GAGTTGGTCTGCAAAGGGTA	ADH7_-_100356631.23-P1P2|ADH7_+_100356564.23-P1P2
ADHFE1	P1P2	ADHFE1_+_67344601.23-P1P2	ADHFE1_+_67344636.23-P1P2	predicted	predicted	GCCTCAAGCCAGTCGGGCTC	GCCTGCCCACCCGCTTCGCG	ADHFE1_+_67344601.23-P1P2|ADHFE1_+_67344636.23-P1P2
ADI1	P1P2	ADI1_+_3523460.23-P1P2	ADI1_+_3523497.23-P1P2	predicted	predicted	GGGGCCTCAGGCAGGTCCGA	GGCCCGGCGCGTCTGGCGAA	ADI1_+_3523460.23-P1P2|ADI1_+_3523497.23-P1P2
ADIG	P1P2	ADIG_+_37209723.23-P1P2	ADIG_-_37209801.23-P1P2	predicted	predicted	GCATGCAGGGGACACTTTGA	GTCACAGCTTAGTCACAGTT	ADIG_+_37209723.23-P1P2|ADIG_-_37209801.23-P1P2
ADIPOQ	P1P2	ADIPOQ_-_186560322.23-P1P2	ADIPOQ_-_186560368.23-P1P2	predicted	predicted	GTGGCTTCCGAAGCCCAAGC	GAGGCTGTGGGCAACTGCCA	ADIPOQ_-_186560322.23-P1P2|ADIPOQ_-_186560368.23-P1P2
ADIPOR1	P1P2	ADIPOR1_+_202927498.23-P1P2	ADIPOR1_+_202927458.23-P1P2	predicted	predicted	GGGACTCCGCGAGAGGGCCT	GAGCCCGCGAGGAGGTGACG	ADIPOR1_+_202927498.23-P1P2|ADIPOR1_+_202927458.23-P1P2
ADIPOR2	P1P2	ADIPOR2_+_1800088.23-P1P2	ADIPOR2_+_1800032.23-P1P2	predicted	predicted	GCAGCCGCGCTGTCCTAAAC	GCATCGTGGGAGCTGTGGTT	ADIPOR2_+_1800088.23-P1P2|ADIPOR2_+_1800032.23-P1P2
ADIRF	P1P2	ADIRF_-_88728085.23-P1P2	ADIRF_+_88728103.23-P1P2	predicted	predicted	GTCCCACCGCGGCCCGTCTT	GCCCTGCTCCAGAGTCCGCA	ADIRF_-_88728085.23-P1P2|ADIRF_+_88728103.23-P1P2
ADK	P1	ADK_-_75936408.23-P1	ADK_+_75936337.23-P1	predicted	predicted	GCGGTGGCCCACGGCGTCTG	GGGGCTAGCGAGATGACTAG	ADK_-_75936408.23-P1|ADK_+_75936337.23-P1
ADK	P2	ADK_+_75910800.23-P2	ADK_-_75910830.23-P2	predicted	predicted	GAGGGACCCCAGACTGCGTT	GGTCTGGGGTCCCTCATGGT	ADK_+_75910800.23-P2|ADK_-_75910830.23-P2
ADM	P1P2	ADM_+_10326407.23-P1P2	ADM_-_10326425.23-P1P2	predicted	predicted	GTGCCCAGAGGGCTTAGGTA	GAGCCCATACCTAAGCCCTC	ADM_+_10326407.23-P1P2|ADM_-_10326425.23-P1P2
ADM2	P1P2	ADM2_-_50919811.23-P1P2	ADM2_+_50919866.23-P1P2	predicted	predicted	GCCAGAAGGCGCTTGGAGTG	GCGGCGAAGGGAGCGGTGGA	ADM2_-_50919811.23-P1P2|ADM2_+_50919866.23-P1P2
ADM5	P1P2	ADM5_+_50191482.23-P1P2	ADM5_-_50191295.23-P1P2	predicted	predicted	GCCTCAGCGCATCCGGTAGT	GAGGGTGGGACCAGCAGTTG	ADM5_+_50191482.23-P1P2|ADM5_-_50191295.23-P1P2
ADNP	P1P2	ADNP_+_49548215.23-P1P2	ADNP_-_49548038.23-P1P2	predicted	predicted	GGCGCCTCCTAGTGGGTCAA	GTGTCCAGCTAAATAGGGGG	ADNP_+_49548215.23-P1P2|ADNP_-_49548038.23-P1P2
ADNP2	P1P2	ADNP2_+_77867018.23-P1P2	ADNP2_+_77866875.23-P1P2	predicted	predicted	GCCCCTGCCTAAAGCTGGAC	GATGACGTCACTAAAGGGGT	ADNP2_+_77867018.23-P1P2|ADNP2_+_77866875.23-P1P2
ADO	P1P2	ADO_-_64564501.23-P1P2	ADO_+_64564489.23-P1P2	predicted	predicted	GGGCGCCCGGCCACCGTCGT	GCGGCCCGCACCTACGACGG	ADO_-_64564501.23-P1P2|ADO_+_64564489.23-P1P2
ADORA1	P1P2	ADORA1_+_203097305.23-P1P2	ADORA1_+_203097299.23-P1P2	predicted	predicted	GGGACTGGGGTGGCAGACGT	GGGGTGGCAGACGTGGGTCT	ADORA1_+_203097305.23-P1P2|ADORA1_+_203097299.23-P1P2
ADORA2A	P1P2	ADORA2A_+_24819784.23-P1P2	ADORA2A_+_24819730.23-P1P2	predicted	predicted	GCCGCTGCGCGGAGAAACCG	GGCCCGCAGGCGATCCTGGA	ADORA2A_+_24819784.23-P1P2|ADORA2A_+_24819730.23-P1P2
ADORA2B	P1P2	ADORA2B_-_15848318.23-P1P2	ADORA2B_-_15848416.23-P1P2	predicted	predicted	GCGGGCGCGAACTTTGGGCT	GGGCCCCGACCCGTGGGTCC	ADORA2B_-_15848318.23-P1P2|ADORA2B_-_15848416.23-P1P2
ADORA3	P1	ADORA3_+_112031595.23-P1	ADORA3_-_112031731.23-P1	predicted	predicted	GAGAAGCTTTGTGCTGGACA	GGCAGCTCCTGCCCTCCTGA	ADORA3_+_112031595.23-P1|ADORA3_-_112031731.23-P1
ADORA3	P2	ADORA3_-_112046483.23-P2	ADORA3_-_112046535.23-P2	predicted	predicted	GAGAAGGCTCGAGACAAGAT	GGGACAGTGCAGGATCAGGT	ADORA3_-_112046483.23-P2|ADORA3_-_112046535.23-P2
ADPGK	P1P2	ADPGK_-_73076196.23-P1P2	ADPGK_+_73076199.23-P1P2	predicted	predicted	GCGCCAGGACGGAGCGAGGG	GAGGCCTGGGACTGAGGCGT	ADPGK_-_73076196.23-P1P2|ADPGK_+_73076199.23-P1P2
ADPRH	P1P2	ADPRH_-_119298448.23-P1P2	ADPRH_+_119298430.23-P1P2	predicted	predicted	GGTCCCGTCCACTCTCGCTT	GGCACCCAAGCGAGAGTGGA	ADPRH_-_119298448.23-P1P2|ADPRH_+_119298430.23-P1P2
ADPRHL1	P1	ADPRHL1_-_114107986.23-P1	ADPRHL1_+_114107989.23-P1	predicted	predicted	GGGCACCAGCTCCTCAGCAG	GGCTGCCGGCAGAAGCTAGC	ADPRHL1_-_114107986.23-P1|ADPRHL1_+_114107989.23-P1
ADPRHL1	P2	ADPRHL1_-_114103638.23-P2	ADPRHL1_+_114103927.23-P2	predicted	predicted	GGAGTGAGCCCCGGTCAGAG	GAGGGTCGGGGCAGCCTGTG	ADPRHL1_-_114103638.23-P2|ADPRHL1_+_114103927.23-P2
ADPRHL2	P1P2	ADPRHL2_-_36554327.23-P1P2	ADPRHL2_-_36554459.23-P1P2	predicted	predicted	GTTAGCCCAGTGGTGAGGAG	GAGCGCTGCGGACGGAAGTA	ADPRHL2_-_36554327.23-P1P2|ADPRHL2_-_36554459.23-P1P2
ADPRM	P1P2	ADPRM_+_10600851.23-P1P2	ADPRM_+_10600844.23-P1P2	predicted	predicted	GCTACCGGAAATCGCGGGGA	GAAATCGCGGGGAGGGTCAA	ADPRM_+_10600851.23-P1P2|ADPRM_+_10600844.23-P1P2
ADRA1A	P1P2	ADRA1A_+_26724815.23-P1P2	ADRA1A_-_26724903.23-P1P2	predicted	predicted	GCGGTAGCAGCAGGAGATTA	GTTTTCCTCTGGCCTAGAGG	ADRA1A_+_26724815.23-P1P2|ADRA1A_-_26724903.23-P1P2
ADRA1B	P1P2	ADRA1B_+_159343419.23-P1P2	ADRA1B_-_159343261.23-P1P2	predicted	predicted	GCGGCACTAGGGGGCAATGC	GAACCCCAGCGGGCCGCCTA	ADRA1B_+_159343419.23-P1P2|ADRA1B_-_159343261.23-P1P2
ADRA1D	P1P2	ADRA1D_+_4230150.23-P1P2	ADRA1D_+_4230414.23-P1P2	predicted	predicted	GAACGCAAAGGGCACCGCTA	GGAGGTGCGGCAGATCCATG	ADRA1D_+_4230150.23-P1P2|ADRA1D_+_4230414.23-P1P2
ADRA2A	P1P2	ADRA2A_-_112836677.23-P1P2	ADRA2A_+_112836593.23-P1P2	predicted	predicted	GCGCTAGACTGGCGGAGGGG	GCGGGACGAGCCCTTTGGAG	ADRA2A_-_112836677.23-P1P2|ADRA2A_+_112836593.23-P1P2
ADRA2B	P1P2	ADRA2B_+_96782430.23-P1P2	ADRA2B_+_96782825.23-P1P2	predicted	predicted	GTCCGGGCGCGGGAAGTCCC	GAGGGGCAGCGCCTGGGAAA	ADRA2B_+_96782430.23-P1P2|ADRA2B_+_96782825.23-P1P2
ADRA2C	P1P2	ADRA2C_+_3767439.23-P1P2	ADRA2C_+_3767752.23-P1P2	predicted	predicted	GggcgagggcgcccccTCCA	Gggcgccgccgcgagtcctc	ADRA2C_+_3767439.23-P1P2|ADRA2C_+_3767752.23-P1P2
ADRB1	P1P2	ADRB1_-_115803460.23-P1P2	ADRB1_+_115803496.23-P1P2	predicted	predicted	GGAGCCGCTCAATTGCCAAC	GGCAAAGGCACGCCCCCGTC	ADRB1_-_115803460.23-P1P2|ADRB1_+_115803496.23-P1P2
ADRB2	P1P2	ADRB2_-_148206087.23-P1P2	ADRB2_+_148206078.23-P1P2	predicted	predicted	GggagTGCCTCGCCCCTTCG	GGCACGCCGGCAGCCGCGAA	ADRB2_-_148206087.23-P1P2|ADRB2_+_148206078.23-P1P2
ADRB3	P1P2	ADRB3_+_37824255.23-P1P2	ADRB3_+_37824159.23-P1P2	predicted	predicted	GGAAACGTGGAGCATCCCAT	GACTCCTCCCCCAAGAGCGG	ADRB3_+_37824255.23-P1P2|ADRB3_+_37824159.23-P1P2
ADRBK1	P1P2	ADRBK1_-_67033739.23-P1P2	ADRBK1_-_67033777.23-P1P2	predicted	predicted	GGGTCTCCGTCCAGCATCGA	GGGTCTGAGCCCGCGGTCGC	ADRBK1_-_67033739.23-P1P2|ADRBK1_-_67033777.23-P1P2
ADRBK2	P1P2	ADRBK2_-_25960540.23-P1P2	ADRBK2_+_25960431.23-P1P2	predicted	predicted	GCGGGAGGTCGGGGCAGTGA	GAACCCAAGGGGTTATGGGG	ADRBK2_-_25960540.23-P1P2|ADRBK2_+_25960431.23-P1P2
ADRM1	P1P2	ADRM1_-_60877923.23-P1P2	ADRM1_-_60877927.23-P1P2	predicted	predicted	GCGGGGAGGAGCGAGTGCGA	GGAGGAGCGAGTGCGATGGA	ADRM1_-_60877923.23-P1P2|ADRM1_-_60877927.23-P1P2
ADSL	P1P2	ADSL_-_40742342.23-P1P2	ADSL_+_40742458.23-P1P2	predicted	predicted	GtagcgcggctaagtaacGT	GGGGCGGGACTTCCTTCACG	ADSL_-_40742342.23-P1P2|ADSL_+_40742458.23-P1P2
ADSS	P1P2	ADSS_+_244615389.23-P1P2	ADSS_+_244615311.23-P1P2	predicted	predicted	GAAGGGGCGTGGCCTCGGTC	GGGCCTGCGCGGGGCAGTCA	ADSS_+_244615389.23-P1P2|ADSS_+_244615311.23-P1P2
ADSSL1	P1P2	ADSSL1_-_105190333.23-P1P2	ADSSL1_-_105190249.23-P1P2	predicted	predicted	GCCTCCGTTGGCAAATTCGT	GGAAGTCCTGGGCCCGGCAA	ADSSL1_-_105190333.23-P1P2|ADSSL1_-_105190249.23-P1P2
ADTRP	P1P2	ADTRP_-_11779125.23-P1P2	ADTRP_+_11779058.23-P1P2	predicted	predicted	GGGACTGAGAGTTCCAACAC	GCCGGCCTGCTGTTGGACTT	ADTRP_-_11779125.23-P1P2|ADTRP_+_11779058.23-P1P2
AEBP1	P1P2	AEBP1_+_44143654.23-P1P2	AEBP1_+_44143844.23-P1P2	predicted	predicted	GCTGGGGTGCGGGTCTGAGG	GgagCCGAGAGTGGACGGAG	AEBP1_+_44143654.23-P1P2|AEBP1_+_44143844.23-P1P2
AEBP2	P1P2	AEBP2_+_19592473.23-P1P2	AEBP2_+_19592455.23-P1P2	predicted	predicted	GTCAGCCTGCACACGCGCTA	GACGGAGCCCGCGCGGGGAC	AEBP2_+_19592473.23-P1P2|AEBP2_+_19592455.23-P1P2
AEN	P1P2	AEN_-_89164321.23-P1P2	AEN_+_89164427.23-P1P2	predicted	predicted	GGGAGCCGGGGAACACTGAT	GAGGCGGGCGAGAGCAGAAG	AEN_-_89164321.23-P1P2|AEN_+_89164427.23-P1P2
AES	P1P2	AES_+_3062686.23-P1P2	AES_-_3062648.23-P1P2	predicted	predicted	GCCGGCTGCCGGGTAGGAGA	Gcgcccgccgcggtgacctt	AES_+_3062686.23-P1P2|AES_-_3062648.23-P1P2
AFAP1	P1P2	AFAP1_+_7941632.23-P1P2	AFAP1_+_7941669.23-P1P2	predicted	predicted	Gtgggcgcccggctccgctg	GCGCGCAGCTCGCTTCCCAT	AFAP1_+_7941632.23-P1P2|AFAP1_+_7941669.23-P1P2
AFAP1L1	P1P2	AFAP1L1_+_148651226.23-P1P2	AFAP1L1_-_148651409.23-P1P2	predicted	predicted	GCTCCGCGGCGCTCCCACTT	GccggcgAGCATCCTGTCTG	AFAP1L1_+_148651226.23-P1P2|AFAP1L1_-_148651409.23-P1P2
AFAP1L2	P1P2	AFAP1L2_+_116164424.23-P1P2	AFAP1L2_+_116164325.23-P1P2	predicted	predicted	GTCGGCGGGCCGGAGTTCTC	GGCGGCCCCGCCAGGAGGTC	AFAP1L2_+_116164424.23-P1P2|AFAP1L2_+_116164325.23-P1P2
AFF1	P1P2	AFF1_+_87855988.23-P1P2	AFF1_+_87856016.23-P1P2	predicted	predicted	GCGGCCCTCCCGGGATTGGT	GGGCGCCACCCAAGCGGCAA	AFF1_+_87855988.23-P1P2|AFF1_+_87856016.23-P1P2
AFF2	P1P2	AFF2_-_147582044.23-P1P2	AFF2_-_147582007.23-P1P2	predicted	predicted	GCGAGCCCCTGCCAGATCCG	GGTGGGAGAGGGTTCCCGAA	AFF2_-_147582044.23-P1P2|AFF2_-_147582007.23-P1P2
AFF3	P1P2	AFF3_+_100759213.23-P1P2	AFF3_+_100759161.23-P1P2	predicted	predicted	GTCTCCCCAGAGTAGAGTCC	GCCCTGCCACAAGTGAGAGT	AFF3_+_100759213.23-P1P2|AFF3_+_100759161.23-P1P2
AFF4	P1P2	AFF4_+_132299514.23-P1P2	AFF4_-_132299583.23-P1P2	predicted	predicted	GGGCTCAGGCCTATACCGCT	GGGGCTGCCACGGCAGTACA	AFF4_+_132299514.23-P1P2|AFF4_-_132299583.23-P1P2
AFG3L2	P1P2	AFG3L2_-_12377381.23-P1P2	AFG3L2_-_12377332.23-P1P2	predicted	predicted	Gggggccgacggagcagcgt	GGCAGAAGACAGGACCAAAT	AFG3L2_-_12377381.23-P1P2|AFG3L2_-_12377332.23-P1P2
AFM	P1P2	AFM_+_74347257.23-P1P2	AFM_-_74347178.23-P1P2	predicted	predicted	GAGTTGGAACAAAAGTCCAC	GtgcttgattatatCTGTTC	AFM_+_74347257.23-P1P2|AFM_-_74347178.23-P1P2
AFMID	P1P2	AFMID_-_76183341.23-P1P2	AFMID_-_76183234.23-P1P2	predicted	predicted	GGACGTGGCTGATCGGGGTG	GCGCCCGGCCGCTGACCTGG	AFMID_-_76183341.23-P1P2|AFMID_-_76183234.23-P1P2
AFP	P1	AFP_+_74301755.23-P1	AFP_-_74301816.23-P1	predicted	predicted	GCAAGGACACAGAGCTCTTT	GCCGCTATGCTGTTAATTAT	AFP_+_74301755.23-P1|AFP_-_74301816.23-P1
AFP	P2	AFP_-_74316161.23-P2	AFP_-_74316274.23-P2	predicted	predicted	GATAATAGGAGTACAGGGAG	GGAGTCTGTGAGAAGAAGCA	AFP_-_74316161.23-P2|AFP_-_74316274.23-P2
AFTPH	P1P2	AFTPH_-_64751447.23-P1P2	AFTPH_+_64751402.23-P1P2	predicted	predicted	GCCCGGAAGTGACGTGTCGG	GCAGGTGGCTAGGTCGGGAC	AFTPH_-_64751447.23-P1P2|AFTPH_+_64751402.23-P1P2
AGA	P1P2	AGA_-_178363639.23-P1P2	AGA_-_178363708.23-P1P2	predicted	predicted	GCCCACGCCCGCTCTCTCGG	GCCGCGGGAGAGTTGTGTCA	AGA_-_178363639.23-P1P2|AGA_-_178363708.23-P1P2
AGAP1	P1P2	AGAP1_-_236402556.23-P1P2	AGAP1_+_236402514.23-P1P2	predicted	predicted	GGGGCCTGGCGCAATTCCCC	GCCGCCCCGCGCCTGCCTCT	AGAP1_-_236402556.23-P1P2|AGAP1_+_236402514.23-P1P2
AGAP10	ENST00000413193.2	AGAP10_+_47240232.23-ENST00000413193.2	AGAP10_-_47240283.23-ENST00000413193.2	predicted	predicted	GGTGACCTTTCCAAGTTTGA	GAAAGCAGACAAATTCTCAT	AGAP10_+_47240232.23-ENST00000413193.2|AGAP10_-_47240283.23-ENST00000413193.2
AGAP11	P1P2	AGAP11_-_88730028.23-P1P2	AGAP11_-_88729915.23-P1P2	predicted	predicted	GCGGGGCAGAAAGGTCTGGT	GGTGGGGCACCTGTAGTCGG	AGAP11_-_88730028.23-P1P2|AGAP11_-_88729915.23-P1P2
AGAP2	P1P2	AGAP2_+_58136072.23-P1P2	AGAP2_+_58136058.23-P1P2	predicted	predicted	GACTGGCTGGCAGGGTTGAT	GTTGATGGGCCAACACTAGA	AGAP2_+_58136072.23-P1P2|AGAP2_+_58136058.23-P1P2
AGAP3	P1P2	AGAP3_+_150783287.23-P1P2	AGAP3_-_150783283.23-P1P2	predicted	predicted	GcccacccGCATTGCCTCGA	GGCAGCTGTCCCCTCCGCGA	AGAP3_+_150783287.23-P1P2|AGAP3_-_150783283.23-P1P2
AGAP6	P1P2	AGAP6_-_51747700.23-P1P2	AGAP6_-_51747853.23-P1P2	predicted	predicted	GGACAAAAATGACCACTCGT	GATAGAGGAAGATGGCTTCA	AGAP6_-_51747700.23-P1P2|AGAP6_-_51747853.23-P1P2
AGAP9	ENST00000453919.1	AGAP9_-_48189116.23-ENST00000453919.1	AGAP9_+_48189065.23-ENST00000453919.1	predicted	predicted	GGTGACCTTTCCAAGTTTGA	GAAAGCAGACAAATTCTCAT	AGAP9_-_48189116.23-ENST00000453919.1|AGAP9_+_48189065.23-ENST00000453919.1
AGBL1	ENST00000421325.2	AGBL1_+_86686740.23-ENST00000421325.2	AGBL1_-_86686859.23-ENST00000421325.2	predicted	predicted	GGGGAAGAGGGTTGTGAAAT	GTGCTCTGTCTCTAGTTGGG	AGBL1_+_86686740.23-ENST00000421325.2|AGBL1_-_86686859.23-ENST00000421325.2
AGBL1	ENST00000441037.2	AGBL1_+_86685156.23-ENST00000441037.2	AGBL1_-_86685066.23-ENST00000441037.2	predicted	predicted	GATCAGGGATGTACATGGAA	GGAAGACTAAATATGGAGGG	AGBL1_+_86685156.23-ENST00000441037.2|AGBL1_-_86685066.23-ENST00000441037.2
AGBL2	P1P2	AGBL2_-_47737034.23-P1P2	AGBL2_-_47736999.23-P1P2	predicted	predicted	GGGAAGGTCTGCAACATGTA	GTAGGCCTCGCCCCCAAGGA	AGBL2_-_47737034.23-P1P2|AGBL2_-_47736999.23-P1P2
AGBL3	P1P2	AGBL3_+_134671129.23-P1P2	AGBL3_+_134671135.23-P1P2	predicted	predicted	GGATGCCGGGAACTCGGGGT	GCCAGAGGATGCCGGGAACT	AGBL3_+_134671129.23-P1P2|AGBL3_+_134671135.23-P1P2
AGBL4	P1P2	AGBL4_+_50489774.23-P1P2	AGBL4_-_50489802.23-P1P2	predicted	predicted	GACCTGGCCCCTGTGCTCTA	GGCACAGGGGCCAGGTCTGT	AGBL4_+_50489774.23-P1P2|AGBL4_-_50489802.23-P1P2
AGBL5	P1	AGBL5_+_27274391.23-P1	AGBL5_+_27274403.23-P1	predicted	predicted	GTGTCGTTCGGGGACGATGG	GTACCTGAGCGAGTGTCGTT	AGBL5_+_27274391.23-P1|AGBL5_+_27274403.23-P1
AGBL5	P2	AGBL5_+_27275819.23-P2	AGBL5_+_27275776.23-P2	predicted	predicted	GACAGCGCAGCTCCATGGTG	GCCGCTCTGGCCCTGAGAGC	AGBL5_+_27275819.23-P2|AGBL5_+_27275776.23-P2
AGER	P1P2	AGER_+_32152177.23-P1P2	AGER_+_32152198.23-P1P2	predicted	predicted	GGCTGGTAGTACCCAGGGGT	GGGGAAGTGACTGTACCCAG	AGER_+_32152177.23-P1P2|AGER_+_32152198.23-P1P2
AGFG1	P1P2	AGFG1_+_228336761.23-P1P2	AGFG1_+_228336733.23-P1P2	predicted	predicted	GAGTCACTGCGGCCTCGCTG	GCCGGGTCTGGAGCCAAGTA	AGFG1_+_228336761.23-P1P2|AGFG1_+_228336733.23-P1P2
AGFG2	P1P2	AGFG2_-_100136730.23-P1P2	AGFG2_-_100136607.23-P1P2	predicted	predicted	GCGGTGGGGCGGGGCATTGG	GGGAACTAGGAGGCGGGCCA	AGFG2_-_100136730.23-P1P2|AGFG2_-_100136607.23-P1P2
AGGF1	P1P2	AGGF1_+_76326122.23-P1P2	AGGF1_+_76326070.23-P1P2	predicted	predicted	GGCGGAGGGGCGTTACCTGA	GAGCCCTAAGAGCGACAGGG	AGGF1_+_76326122.23-P1P2|AGGF1_+_76326070.23-P1P2
AGK	P1P2	AGK_+_141251070.23-P1P2	AGK_+_141251101.23-P1P2	predicted	predicted	GGGAACCGGCTCGGATGCTC	GAGCGCGCGCGGGCCAGTTC	AGK_+_141251070.23-P1P2|AGK_+_141251101.23-P1P2
AGL	P1P2	AGL_-_100315585.23-P1P2	AGL_-_100315511.23-P1P2	predicted	predicted	GGGCCCGGAGCCGACTGAGA	GGGCCGGTGCACCTTCCCCA	AGL_-_100315585.23-P1P2|AGL_-_100315511.23-P1P2
AGMAT	P1P2	AGMAT_+_15911700.23-P1P2	AGMAT_-_15911608.23-P1P2	predicted	predicted	GGACACCCCTGGCACAGTGC	GGGGCGCCCTAGGATCAAGG	AGMAT_+_15911700.23-P1P2|AGMAT_-_15911608.23-P1P2
AGMO	P1P2	AGMO_-_15601702.23-P1P2	AGMO_-_15601771.23-P1P2	predicted	predicted	GGGGCGCTGGGCCAGAAACA	GAGTGCAGTTTGACTGTAGG	AGMO_-_15601702.23-P1P2|AGMO_-_15601771.23-P1P2
AGO1	P1P2	AGO1_+_36348604.23-P1P2	AGO1_-_36348679.23-P1P2	predicted	predicted	GCAGTGGTATAAGTGGGGCA	GCCGCCGGGCTGCATGGCGA	AGO1_+_36348604.23-P1P2|AGO1_-_36348679.23-P1P2
AGO2	P1P2	AGO2_+_141646084.23-P1P2	AGO2_+_141646042.23-P1P2	predicted	predicted	GGGGCCCGGCTCCTCCCCGT	GTGGCAGTGAAGGgtccccg	AGO2_+_141646084.23-P1P2|AGO2_+_141646042.23-P1P2
AGO3	P1P2	AGO3_+_36396586.23-P1P2	AGO3_+_36396538.23-P1P2	predicted	predicted	GACGTCGGGGCAGGAGCGGC	GGGAGCCGGGCCACATGCGG	AGO3_+_36396586.23-P1P2|AGO3_+_36396538.23-P1P2
AGO4	P1P2	AGO4_+_36273504.23-P1P2	AGO4_+_36273483.23-P1P2	predicted	predicted	GCGGTGGCCAACGGCTCTGG	GGCTACGTGCCATCCCCCCA	AGO4_+_36273504.23-P1P2|AGO4_+_36273483.23-P1P2
AGPAT1	P1	AGPAT1_+_32143987.23-P1	AGPAT1_+_32143976.23-P1	predicted	predicted	GGGGGCTCGCAAGAGGACAC	GGAGGACACTGGTAGATGTG	AGPAT1_+_32143987.23-P1|AGPAT1_+_32143976.23-P1
AGPAT1	P2	AGPAT1_+_32145021.23-P2	AGPAT1_-_32145085.23-P2	predicted	predicted	GTGACCCTCACTGTGACTAA	GACTCCCCGGGGTCCAACCT	AGPAT1_+_32145021.23-P2|AGPAT1_-_32145085.23-P2
AGPAT2	P1P2	AGPAT2_+_139582049.23-P1P2	AGPAT2_+_139581987.23-P1P2	predicted	predicted	Gggaagggggggccgtgtcg	Gaccgtgtcggggcgttgtt	AGPAT2_+_139582049.23-P1P2|AGPAT2_+_139581987.23-P1P2
AGPAT3	P1P2	AGPAT3_+_45284894.23-P1P2	AGPAT3_+_45284965.23-P1P2	predicted	predicted	Ggggacgcggaggggacacg	GgcggccgAGGGACACGCTg	AGPAT3_+_45284894.23-P1P2|AGPAT3_+_45284965.23-P1P2
AGPAT4	P1P2	AGPAT4_-_161695216.23-P1P2	AGPAT4_+_161695166.23-P1P2	predicted	predicted	GAAGTTAGCAGTTGCCGAGA	GTAAAAGGAAGTGACATGGG	AGPAT4_-_161695216.23-P1P2|AGPAT4_+_161695166.23-P1P2
AGPAT5	P1P2	AGPAT5_+_6565971.23-P1P2	AGPAT5_-_6565848.23-P1P2	predicted	predicted	GGCTCCCGGCGGCAAAGCAA	GGAGGTGGAACTATGGCAAC	AGPAT5_+_6565971.23-P1P2|AGPAT5_-_6565848.23-P1P2
AGPAT6	P1P2	AGPAT6_+_41435547.23-P1P2	AGPAT6_+_41435576.23-P1P2	predicted	predicted	GGACCCGCGGAGTCGCCCTC	GGTGCCGCGTGGACCGGTCG	AGPAT6_+_41435547.23-P1P2|AGPAT6_+_41435576.23-P1P2
AGPAT9	P1P2	AGPAT9_-_84457353.23-P1P2	AGPAT9_-_84457202.23-P1P2	predicted	predicted	GAGGGAACCTGGCTCGGGGA	GGAGCTCCCCCGTTGGGTGA	AGPAT9_-_84457353.23-P1P2|AGPAT9_-_84457202.23-P1P2
AGPS	P1P2	AGPS_+_178257430.23-P1P2	AGPS_+_178257194.23-P1P2	predicted	predicted	GCCGGCGCGACCATTCGCTG	GAACCCTGGGTGGTGTCCTC	AGPS_+_178257430.23-P1P2|AGPS_+_178257194.23-P1P2
AGR2	P1P2	AGR2_+_16844671.23-P1P2	AGR2_+_16844743.23-P1P2	predicted	predicted	GAAATGCAGCACTAGTGGGT	GCAAGGAACTCTTTAACCCA	AGR2_+_16844671.23-P1P2|AGR2_+_16844743.23-P1P2
AGR3	P1P2	AGR3_-_16921700.23-P1P2	AGR3_+_16921750.23-P1P2	predicted	predicted	GGAAACAAGAGCATAGTTAC	GGTGTGAGAAGCATGAGAAC	AGR3_-_16921700.23-P1P2|AGR3_+_16921750.23-P1P2
AGRN	P1P2	AGRN_-_955290.23-P1P2	AGRN_-_955277.23-P1P2	predicted	predicted	GCGTCCCGGGGCTTTGTTcg	GGCGCCGGGCGCTGCGTCCC	AGRN_-_955290.23-P1P2|AGRN_-_955277.23-P1P2
AGRP	P1P2	AGRP_+_67517567.23-P1P2	AGRP_-_67517628.23-P1P2	predicted	predicted	GGCTCAGGTTCAGGGAGTGA	GAGTGCCTATCTCCAATTTG	AGRP_+_67517567.23-P1P2|AGRP_-_67517628.23-P1P2
AGT	P1P2	AGT_-_230850035.23-P1P2	AGT_-_230850022.23-P1P2	predicted	predicted	GTCACGCTGGGACCTCTTCC	GCCAGAAGCGACACTCACGC	AGT_-_230850035.23-P1P2|AGT_-_230850022.23-P1P2
AGTPBP1	P1P2	AGTPBP1_-_88356982.23-P1P2	AGTPBP1_-_88356950.23-P1P2	predicted	predicted	GTGCGAGGCCGCGAAAGGGG	GTCCCAGCACGCGCAGGGAG	AGTPBP1_-_88356982.23-P1P2|AGTPBP1_-_88356950.23-P1P2
AGTR1	P1P2	AGTR1_-_148415568.23-P1P2	AGTR1_-_148415631.23-P1P2	predicted	predicted	GTCCCGAGAGGGAGGAGGTT	GCAAAACAGAGCCTCGTCCC	AGTR1_-_148415568.23-P1P2|AGTR1_-_148415631.23-P1P2
AGTR2	P1P2	AGTR2_+_115301751.23-P1P2	AGTR2_-_115301979.23-P1P2	predicted	predicted	GTTGAAGTCAGTGGCTTACT	GACAGACCAAACATATAAGA	AGTR2_+_115301751.23-P1P2|AGTR2_-_115301979.23-P1P2
AGTRAP	P1P2	AGTRAP_-_11796030.23-P1P2	AGTRAP_-_11796101.23-P1P2	predicted	predicted	GCGGCCCCCAAGTACTGCCT	GTCTCCTAGCAACCAAGCGG	AGTRAP_-_11796030.23-P1P2|AGTRAP_-_11796101.23-P1P2
AGXT	P1P2	AGXT_-_241808016.23-P1P2	AGXT_-_241808010.23-P1P2	predicted	predicted	GAGTGGGAGCGAGGAGGGCT	GACTCAGAGTGGGAGCGAGG	AGXT_-_241808016.23-P1P2|AGXT_-_241808010.23-P1P2
AGXT2	P1P2	AGXT2_+_35048343.23-P1P2	AGXT2_-_35048121.23-P1P2	predicted	predicted	GTACCCGGATGAAACTCCGA	GTAAAAGGGGAATCCTGGAG	AGXT2_+_35048343.23-P1P2|AGXT2_-_35048121.23-P1P2
AHCTF1	P1P2	AHCTF1_-_247095352.23-P1P2	AHCTF1_+_247095519.23-P1P2	predicted	predicted	GGGGACCAGAGTTCTCGCGA	GTTCACGCGCAAGGCACTGT	AHCTF1_-_247095352.23-P1P2|AHCTF1_+_247095519.23-P1P2
AHCY	P1P2	AHCY_-_32891325.23-P1P2	AHCY_+_32891322.23-P1P2	predicted	predicted	GCCCCAGGAGTCTCACTCAC	GCCGGCGCTCCCTTCCGGAC	AHCY_-_32891325.23-P1P2|AHCY_+_32891322.23-P1P2
AHCYL1	P1	AHCYL1_-_110527197.23-P1	AHCYL1_+_110527236.23-P1	predicted	predicted	GGAACCTCGCGCTGCTCCCA	GCTCGAGAGCGAAGTTCCCA	AHCYL1_-_110527197.23-P1|AHCYL1_+_110527236.23-P1
AHCYL1	P2	AHCYL1_-_110546620.23-P2	AHCYL1_-_110546579.23-P2	predicted	predicted	GCAAGGGTCAAACTACTCTT	GGTGAAGTGTTTAGTCTTAC	AHCYL1_-_110546620.23-P2|AHCYL1_-_110546579.23-P2
AHCYL2	P1P2	AHCYL2_-_128864748.23-P1P2	AHCYL2_-_128864790.23-P1P2	predicted	predicted	GAGGCCAGACCgggacgggg	Ggactggcgggcggagaaag	AHCYL2_-_128864748.23-P1P2|AHCYL2_-_128864790.23-P1P2
AHDC1	P1P2	AHDC1_-_27930791.23-P1P2	AHDC1_-_27930982.23-P1P2	predicted	predicted	GgccgcgccggcTGCTCCGA	GCGGGGTCTGAGAGTGGAAT	AHDC1_-_27930791.23-P1P2|AHDC1_-_27930982.23-P1P2
AHI1	P1P2	AHI1_+_135818995.23-P1P2	AHI1_+_135818945.23-P1P2	predicted	predicted	GTCCTCCTGGAAGAAGGCGG	GCCTAGAGCGCGGGACGCAT	AHI1_+_135818995.23-P1P2|AHI1_+_135818945.23-P1P2
AHNAK	P1	AHNAK_-_62314398.23-P1	AHNAK_+_62314474.23-P1	predicted	predicted	Ggggctgggactggcgagcg	GGGGGGCAGTGGATGCGGGG	AHNAK_-_62314398.23-P1|AHNAK_+_62314474.23-P1
AHNAK	P2	AHNAK_-_62313234.23-P2	AHNAK_+_62313138.23-P2	predicted	predicted	GACCACTCCTCCCTGAGTTC	GCGGGCTTGGCGTGGGAGGA	AHNAK_-_62313234.23-P2|AHNAK_+_62313138.23-P2
AHNAK2	P1	AHNAK2_-_105436987.23-P1	AHNAK2_+_105436977.23-P1	predicted	predicted	GAGTGGGCGGGTCCCCTGAT	GCAGGCTCCTGGCCCATCAG	AHNAK2_-_105436987.23-P1|AHNAK2_+_105436977.23-P1
AHNAK2	P2	AHNAK2_-_105444790.23-P2	AHNAK2_+_105444772.23-P2	predicted	predicted	GCAGCCCTGCCGGGCCACTG	GGCTCCGCAGTGGCCCGGCA	AHNAK2_-_105444790.23-P2|AHNAK2_+_105444772.23-P2
AHR	P1P2	AHR_-_17338168.23-P1P2	AHR_-_17338209.23-P1P2	predicted	predicted	GGGAATGGAATCCAGATggg	Ggggctacgcgggatctggg	AHR_-_17338168.23-P1P2|AHR_-_17338209.23-P1P2
AHRR	P1P2	AHRR_+_321718.23-P1P2	AHRR_+_321668.23-P1P2	predicted	predicted	GGGTCCGGCTGTCTCGGGTC	GACGCCATCCGGTTCCCCTG	AHRR_+_321718.23-P1P2|AHRR_+_321668.23-P1P2
AHSA1	P1P2	AHSA1_-_77924357.23-P1P2	AHSA1_-_77924364.23-P1P2	predicted	predicted	GTGGGACGGAAGTAACCGGT	GGAAGTAACCGGTGGGAGTG	AHSA1_-_77924357.23-P1P2|AHSA1_-_77924364.23-P1P2
AHSA2	P1P2	AHSA2_-_61404431.23-P1P2	AHSA2_-_61404501.23-P1P2	predicted	predicted	GACGCGCAGCGGAAccccgg	GcgACCCGCCTCCCAGATCC	AHSA2_-_61404431.23-P1P2|AHSA2_-_61404501.23-P1P2
AHSG	P1P2	AHSG_+_186330694.23-P1P2	AHSG_-_186330727.23-P1P2	predicted	predicted	GAAACAGGTTAGGACATCGC	GTAACCTGTTTGCTTTTCCA	AHSG_+_186330694.23-P1P2|AHSG_-_186330727.23-P1P2
AHSP	P1P2	AHSP_+_31539124.23-P1P2	AHSP_+_31539121.23-P1P2	predicted	predicted	GAGGGTGATAGGTCATTCTA	GGTGATAGGTCATTCTAGGG	AHSP_+_31539124.23-P1P2|AHSP_+_31539121.23-P1P2
AICDA	P1P2	AICDA_-_8765593.23-P1P2	AICDA_+_8765490.23-P1P2	predicted	predicted	GGGGTGGGTGGGGCTGTCAT	GTCAGGGGAGGAGCCCAAAA	AICDA_-_8765593.23-P1P2|AICDA_+_8765490.23-P1P2
AIDA	P1P2	AIDA_-_222885948.23-P1P2	AIDA_+_222885921.23-P1P2	predicted	predicted	GCTATTGCGGCATTCTCCCT	GGAGAATGCCGCAATAGCGA	AIDA_-_222885948.23-P1P2|AIDA_+_222885921.23-P1P2
AIF1	P1P2	AIF1_+_31583695.23-P1P2	AIF1_-_31583545.23-P1P2	predicted	predicted	GAGGGTGTAAGGAGCTAGAG	GACTGTAGGCGGTGGAGACA	AIF1_+_31583695.23-P1P2|AIF1_-_31583545.23-P1P2
AIF1L	P1P2	AIF1L_-_133971722.23-P1P2	AIF1L_+_133971747.23-P1P2	predicted	predicted	GCTCCAGCAGAGGGGTCGGC	GCGCTCCGCGGGCTTCAAAG	AIF1L_-_133971722.23-P1P2|AIF1L_+_133971747.23-P1P2
AIFM1	P1P2	AIFM1_-_129299826.23-P1P2	AIFM1_+_129299854.23-P1P2	predicted	predicted	GGAAGGGGAACGGCGACCGG	GGTGCGGACCAATCGCAATG	AIFM1_-_129299826.23-P1P2|AIFM1_+_129299854.23-P1P2
AIFM2	P1P2	AIFM2_-_71892672.23-P1P2	AIFM2_-_71892662.23-P1P2	predicted	predicted	GAAACGGTCCTGGCACGCTG	GCAGGCCCCGGAAACGGTCC	AIFM2_-_71892672.23-P1P2|AIFM2_-_71892662.23-P1P2
AIFM3	P1	AIFM3_+_21321369.23-P1	AIFM3_+_21321340.23-P1	predicted	predicted	GCTCTGTGGTGAACAGAAGT	GCCCGGGCCTGATGGGGTTA	AIFM3_+_21321369.23-P1|AIFM3_+_21321340.23-P1
AIFM3	P2	AIFM3_-_21319310.23-P2	AIFM3_+_21319253.23-P2	predicted	predicted	GACTCCGGTCCGGACGCCGA	GAGGCAGCCAGGGGCCGCTC	AIFM3_-_21319310.23-P2|AIFM3_+_21319253.23-P2
AIG1	P1P2	AIG1_+_143381687.23-P1P2	AIG1_-_143381758.23-P1P2	predicted	predicted	GCGACCTCTGAGTGCTACGA	GCCTCCTGGCCGGGTGTCCC	AIG1_+_143381687.23-P1P2|AIG1_-_143381758.23-P1P2
AIM1	P1P2	AIM1_-_106960321.23-P1P2	AIM1_-_106960246.23-P1P2	predicted	predicted	GCTCCCTGAGAGCGCTGCCA	GAGGTCCAGCGGCCGTAGGT	AIM1_-_106960321.23-P1P2|AIM1_-_106960246.23-P1P2
AIM1L	P1	AIM1L_+_26680689.23-P1	AIM1L_-_26680660.23-P1	predicted	predicted	GGCGGCCCTGAGGAATCTGA	GCCGTCCGGCACCCTGTGAT	AIM1L_+_26680689.23-P1|AIM1L_-_26680660.23-P1
AIM1L	P2	AIM1L_-_26663124.23-P2	AIM1L_+_26663011.23-P2	predicted	predicted	GACCGGCTGCAGCGAGGCGA	GCGCCCCCACGCAGAGGTAG	AIM1L_-_26663124.23-P2|AIM1L_+_26663011.23-P2
AIM2	P1P2	AIM2_-_159046642.23-P1P2	AIM2_+_159046713.23-P1P2	predicted	predicted	GTGACAACTGGAGCTCTAAT	GAATCAGTGTAGTTCCTATG	AIM2_-_159046642.23-P1P2|AIM2_+_159046713.23-P1P2
AIMP1	P1P2	AIMP1_-_107237426.23-P1P2	AIMP1_+_107237433.23-P1P2	predicted	predicted	GCCACCGCGACCCAACGCTG	GGGGAAGGACACCACAAGTC	AIMP1_-_107237426.23-P1P2|AIMP1_+_107237433.23-P1P2
AIMP2	P1P2	AIMP2_-_6048734.23-P1P2	AIMP2_+_6048716.23-P1P2	predicted	predicted	GCCGCCTCCTGAACTCCCAT	GCAGCCAATGGGAGTTCAGG	AIMP2_-_6048734.23-P1P2|AIMP2_+_6048716.23-P1P2
AIP	P1P2	AIP_+_67250428.23-P1P2	AIP_+_67250405.23-P1P2	predicted	predicted	GAGCGCGCGCGTCTGCTCGG	GGGAGCCTAGGAATGTCTCG	AIP_+_67250428.23-P1P2|AIP_+_67250405.23-P1P2
AIPL1	P1P2	AIPL1_-_6338494.23-P1P2	AIPL1_+_6338586.23-P1P2	predicted	predicted	GTCCGGGGAAGACACTTAGG	GACCACAGGCCCGGCCCGAG	AIPL1_-_6338494.23-P1P2|AIPL1_+_6338586.23-P1P2
AIRE	P1P2	AIRE_+_45705574.23-P1P2	AIRE_+_45705674.23-P1P2	predicted	predicted	GTGGCCTGACTCACCCACCA	GCCGCCCCGGCGCCCAATCA	AIRE_+_45705574.23-P1P2|AIRE_+_45705674.23-P1P2
AJAP1	P1P2	AJAP1_-_4714530.23-P1P2	AJAP1_-_4714137.23-P1P2	predicted	predicted	GACCCCGGCCCCCGCAAGGT	GGAGCAGAGGAGTCCCTCGT	AJAP1_-_4714530.23-P1P2|AJAP1_-_4714137.23-P1P2
AJUBA	P1P2	AJUBA_-_23451861.23-P1P2	AJUBA_-_23451893.23-P1P2	predicted	predicted	GTGGCCGGATCTACTTTCCT	GGCGGTGTGTGCGAGAGCGC	AJUBA_-_23451861.23-P1P2|AJUBA_-_23451893.23-P1P2
AK1	P1P2	AK1_+_130640205.23-P1P2	AK1_-_130640123.23-P1P2	predicted	predicted	Gcacagtcggggtatcgcaa	GTGCGCGGCGACACCGCACC	AK1_+_130640205.23-P1P2|AK1_-_130640123.23-P1P2
AK2	P1P2	AK2_-_33502722.23-P1P2	AK2_-_33502689.23-P1P2	predicted	predicted	GAGTGGGCGGGAAAACGCGA	GGGCCAGCATGTACTAAGGG	AK2_-_33502722.23-P1P2|AK2_-_33502689.23-P1P2
AK3	P1P2	AK3_+_4741310.23-P1P2	AK3_+_4741362.23-P1P2	predicted	predicted	GGGAACAGGCGCTCGGTCGG	GGGCCGAGCGAGCGCAGAGG	AK3_+_4741310.23-P1P2|AK3_+_4741362.23-P1P2
AK4	P1P2	AK4_+_65613776.23-P1P2	AK4_+_65613027.23-P1P2	predicted	predicted	GGTGCCCCGCCCTGCCGACT	GGGACCGCGGTCTACTGCAA	AK4_+_65613776.23-P1P2|AK4_+_65613027.23-P1P2
AK5	P1P2	AK5_+_77747582.23-P1P2	AK5_+_77747520.23-P1P2	predicted	predicted	GCCCCGAGCCGGGTCTGCGG	GTGGGGGCGGGCACGCGCAA	AK5_+_77747582.23-P1P2|AK5_+_77747520.23-P1P2
AK7	P1P2	AK7_+_96858344.23-P1P2	AK7_+_96858230.23-P1P2	predicted	predicted	Ggcggggaggggcgtgtcgt	Ggggcggggcgtgccgggta	AK7_+_96858344.23-P1P2|AK7_+_96858230.23-P1P2
AK8	P1P2	AK8_+_135753758.23-P1P2	AK8_+_135753796.23-P1P2	predicted	predicted	GGACCCGCGCGACCGAGGAT	GCCGCAGAGCGCGTCAGCCG	AK8_+_135753758.23-P1P2|AK8_+_135753796.23-P1P2
AK9	P1P2	AK9_-_110012489.23-P1P2	AK9_-_110012453.23-P1P2	predicted	predicted	GGAGGCGGGGCGCAGGGATC	GAGCCCCGCTCCCGACGTGA	AK9_-_110012489.23-P1P2|AK9_-_110012453.23-P1P2
AKAP1	P1P2	AKAP1_+_55162449.23-P1P2	AKAP1_-_55162556.23-P1P2	predicted	predicted	GTCTCCCAGCTGCGCCAGAG	GCGGGAGCGCGCGGGCACAA	AKAP1_+_55162449.23-P1P2|AKAP1_-_55162556.23-P1P2
AKAP10	P1P2	AKAP10_+_19881269.23-P1P2	AKAP10_+_19881302.23-P1P2	predicted	predicted	GCACCCAGGGCCCGGGAAAG	GAAAACAGCTGCAGGAACGG	AKAP10_+_19881269.23-P1P2|AKAP10_+_19881302.23-P1P2
AKAP11	P1P2	AKAP11_-_42846153.23-P1P2	AKAP11_-_42846166.23-P1P2	predicted	predicted	GTCTCGCGAGAGAGAGTGGG	GAGTGGGAGGCGTGGAGAGT	AKAP11_-_42846153.23-P1P2|AKAP11_-_42846166.23-P1P2
AKAP12	P1	AKAP12_+_151561304.23-P1	AKAP12_-_151561398.23-P1	predicted	predicted	GGGCGCCTCCCGTTTCTAAC	GTCTGGTCCCGGCAGCCTGG	AKAP12_+_151561304.23-P1|AKAP12_-_151561398.23-P1
AKAP12	P2	AKAP12_+_151646568.23-P2	AKAP12_-_151646630.23-P2	predicted	predicted	GAGTCCCGGGAGGGTTTAAA	GCTCACAGAGCCCAGCTCGG	AKAP12_+_151646568.23-P2|AKAP12_-_151646630.23-P2
AKAP13	P1P2	AKAP13_+_85923715.23-P1P2	AKAP13_-_85923664.23-P1P2	predicted	predicted	GGGAGCAAGAACTGCGAGCT	GCAACCTGAGTGCCCCGTCC	AKAP13_+_85923715.23-P1P2|AKAP13_-_85923664.23-P1P2
AKAP14	P1P2	AKAP14_-_119030138.23-P1P2	AKAP14_+_119029916.23-P1P2	predicted	predicted	GCACTTGCAAACATTCCATC	GCAGCCGAAGATGAGCTTAC	AKAP14_-_119030138.23-P1P2|AKAP14_+_119029916.23-P1P2
AKAP17A	P1P2	AKAP17A_-_1710389.23-P1P2	AKAP17A_-_1710334.23-P1P2	predicted	predicted	GCACGCGCAGTGCAAAAGGT	GACCTCCCCTGGTTACCCGC	AKAP17A_-_1710389.23-P1P2|AKAP17A_-_1710334.23-P1P2
AKAP2	P1P2	AKAP2_-_112810838.23-P1P2	AKAP2_-_112810868.23-P1P2	predicted	predicted	GGAGAAGGTGTGGGTAGATG	GGGAGGGAGGGGCGGTCCGT	AKAP2_-_112810838.23-P1P2|AKAP2_-_112810868.23-P1P2
AKAP3	P1	AKAP3_+_4758311.23-P1	AKAP3_+_4758248.23-P1	predicted	predicted	GGACAGGACCCGGACAACCC	GCAGCACTCCCGGCTGACTA	AKAP3_+_4758311.23-P1|AKAP3_+_4758248.23-P1
AKAP3	P2	AKAP3_-_4754480.23-P2	AKAP3_-_4754458.23-P2	predicted	predicted	GGGTGAAGATATACTCCAAG	GGGTCAACAGGACAAAGAGG	AKAP3_-_4754480.23-P2|AKAP3_-_4754458.23-P2
AKAP4	P1P2	AKAP4_+_49965636.23-P1P2	AKAP4_-_49965130.23-P1P2	predicted	predicted	GGGCAGTCAAGGCTGTAGGA	GTAAGCAAAGGTGGGCATGT	AKAP4_+_49965636.23-P1P2|AKAP4_-_49965130.23-P1P2
AKAP5	P1P2	AKAP5_-_64932041.23-P1P2	AKAP5_+_64932145.23-P1P2	predicted	predicted	GCGCCCGGGCGGAGCACGAT	GCAGGCAGCGCCAATGCgag	AKAP5_-_64932041.23-P1P2|AKAP5_+_64932145.23-P1P2
AKAP6	P1P2	AKAP6_-_32798421.23-P1P2	AKAP6_+_32798465.23-P1P2	predicted	predicted	GAGGGCTTCCGTATTGTCTC	GGGAAAGACTGCTGTTGCTA	AKAP6_-_32798421.23-P1P2|AKAP6_+_32798465.23-P1P2
AKAP7	P1P2	AKAP7_-_131456436.23-P1P2	AKAP7_+_131456510.23-P1P2	predicted	predicted	GGGCTGCCAAAGGCCGTCGG	GAAACTAGGGCCGGCGACTG	AKAP7_-_131456436.23-P1P2|AKAP7_+_131456510.23-P1P2
AKAP8	P1P2	AKAP8_+_15490691.23-P1P2	AKAP8_+_15490710.23-P1P2	predicted	predicted	GAGGCCAGCTGGGACGGCGA	GTGGATCGTAGCAGCCCGAA	AKAP8_+_15490691.23-P1P2|AKAP8_+_15490710.23-P1P2
AKAP8L	P1P2	AKAP8L_+_15530119.23-P1P2	AKAP8L_+_15529917.23-P1P2	predicted	predicted	GtccctctgGCGGGTCTCCA	GTCCAGCCACTGATATGAGG	AKAP8L_+_15530119.23-P1P2|AKAP8L_+_15529917.23-P1P2
AKAP9	P1P2	AKAP9_-_91570088.23-P1P2	AKAP9_-_91570049.23-P1P2	predicted	predicted	GGCCTGGCAAGGGTTGACCC	GTCTACGGCGGGATCCTCGC	AKAP9_-_91570088.23-P1P2|AKAP9_-_91570049.23-P1P2
AKIP1	P1P2	AKIP1_-_8932590.23-P1P2	AKIP1_+_8932636.23-P1P2	predicted	predicted	GAACTCGCGCGCAGACGCCA	Gcgggagaggcgggagaagt	AKIP1_-_8932590.23-P1P2|AKIP1_+_8932636.23-P1P2
AKIRIN1	P1P2	AKIRIN1_+_39456792.23-P1P2	AKIRIN1_+_39456803.23-P1P2	predicted	predicted	GTGAAGAAATGGAACGGTCT	GgcgcccccTGCTGAAGAAA	AKIRIN1_+_39456792.23-P1P2|AKIRIN1_+_39456803.23-P1P2
AKIRIN2	P1P2	AKIRIN2_+_88411936.23-P1P2	AKIRIN2_-_88412112.23-P1P2	predicted	predicted	GGGGTGGGAGAGTTCTACGA	GTCGGCTTGAAAGGCGGGAA	AKIRIN2_+_88411936.23-P1P2|AKIRIN2_-_88412112.23-P1P2
AKNA	P1	AKNA_+_117150432.23-P1	AKNA_+_117150443.23-P1	predicted	predicted	GACTGCGGAGGGCTTGCAAG	GGGGCAGCGCTGACTGCGGA	AKNA_+_117150432.23-P1|AKNA_+_117150443.23-P1
AKNA	P2	AKNA_-_117160934.23-P2	AKNA_-_117160954.23-P2	predicted	predicted	GCCCCAGGAACTCGGACATA	GGGAGCGCAAACCCTGCTGC	AKNA_-_117160934.23-P2|AKNA_-_117160954.23-P2
AKNAD1	ENST00000370001.3	AKNAD1_-_109399880.23-ENST00000370001.3	AKNAD1_-_109399892.23-ENST00000370001.3	predicted	predicted	GGCCAGTCCCTGAGTAGGAA	GGTAGGAATGGACAACAAGG	AKNAD1_-_109399880.23-ENST00000370001.3|AKNAD1_-_109399892.23-ENST00000370001.3
AKR1A1	P1P2	AKR1A1_-_46016448.23-P1P2	AKR1A1_-_46016354.23-P1P2	predicted	predicted	GTAGGCGCGCGGTGCAATGT	GATGGCATTGTGAATCCGGA	AKR1A1_-_46016448.23-P1P2|AKR1A1_-_46016354.23-P1P2
AKR1B1	P1P2	AKR1B1_-_134143985.23-P1P2	AKR1B1_+_134144039.23-P1P2	predicted	predicted	GCCGCGGCGGCCTTCCCCAA	GCGGGGCGCGGGCGAGCGTT	AKR1B1_-_134143985.23-P1P2|AKR1B1_+_134144039.23-P1P2
AKR1B10	P1P2	AKR1B10_+_134212131.23-P1P2	AKR1B10_+_134212085.23-P1P2	predicted	predicted	GTTGGAGTTTCTGCTTGTTC	GCAAAAGTTggaaggtaggg	AKR1B10_+_134212131.23-P1P2|AKR1B10_+_134212085.23-P1P2
AKR1B15	P1P2	AKR1B15_+_134233809.23-P1P2	AKR1B15_+_134233642.23-P1P2	predicted	predicted	Gccggtggcgaatctctctg	Gccttggcctaaagagggga	AKR1B15_+_134233809.23-P1P2|AKR1B15_+_134233642.23-P1P2
AKR1C1	P1P2	AKR1C1_+_5005505.23-P1P2	AKR1C1_+_5005516.23-P1P2	predicted	predicted	GCATGTGAGAGGAGGGACAG	GTTAACCAATGGCATGTGAG	AKR1C1_+_5005505.23-P1P2|AKR1C1_+_5005516.23-P1P2
AKR1C2	P1	AKR1C2_+_5046391.23-P1	AKR1C2_-_5046153.23-P1	predicted	predicted	GCAGAAGGAACTCATCATCA	GCATGTGAGAGGAGGGACAG	AKR1C2_+_5046391.23-P1|AKR1C2_-_5046153.23-P1
AKR1C2	P2	AKR1C2_+_5060451.23-P2	AKR1C2_+_5060378.23-P2	predicted	predicted	Gactccaagtaagacaagag	Ggaagcaccagaggttaggg	AKR1C2_+_5060451.23-P2|AKR1C2_+_5060378.23-P2
AKR1C3	P1P2	AKR1C3_+_5136495.23-P1P2	AKR1C3_+_5136475.23-P1P2	predicted	predicted	GCATGTAGGAGGAGGTACAT	GGGCAGTCTTATATGGTCTG	AKR1C3_+_5136495.23-P1P2|AKR1C3_+_5136475.23-P1P2
AKR1C4	P1P2	AKR1C4_+_5238708.23-P1P2	AKR1C4_+_5238746.23-P1P2	predicted	predicted	GGCTCCCTGGGGCTAATCAA	GCAGGGGTTATGTAAAACAT	AKR1C4_+_5238708.23-P1P2|AKR1C4_+_5238746.23-P1P2
AKR1D1	P1P2	AKR1D1_+_137760957.23-P1P2	AKR1D1_+_137761175.23-P1P2	predicted	predicted	GTGTCTGGCCTCtatcagtt	GGGCCTATTCCATCAAAGAA	AKR1D1_+_137760957.23-P1P2|AKR1D1_+_137761175.23-P1P2
AKR1E2	P1P2	AKR1E2_+_4868216.23-P1P2	AKR1E2_+_4868197.23-P1P2	predicted	predicted	GGCGCTCTGGACATCCTGAT	GTGGCTGGCGGCATAGACGA	AKR1E2_+_4868216.23-P1P2|AKR1E2_+_4868197.23-P1P2
AKR7A2	P1P2	AKR7A2_+_19638727.23-P1P2	AKR7A2_-_19638689.23-P1P2	predicted	predicted	GGCCGCGCGCTGGGCTGACC	GGGAGCGCGGAGGCAGTTGG	AKR7A2_+_19638727.23-P1P2|AKR7A2_-_19638689.23-P1P2
AKR7A3	P1P2	AKR7A3_-_19615644.23-P1P2	AKR7A3_-_19615633.23-P1P2	predicted	predicted	GACGGGGTGGGGTGGACCTA	GAGGGAGCGCTTACGGGGTG	AKR7A3_-_19615644.23-P1P2|AKR7A3_-_19615633.23-P1P2
AKT1	P1P2	AKT1_-_105262247.23-P1P2	AKT1_+_105262410.23-P1P2	predicted	predicted	GGGGGCAGCTCCCGACGACC	GCGCGCGGAGGCAGAAGTCC	AKT1_-_105262247.23-P1P2|AKT1_+_105262410.23-P1P2
AKT1S1	P1P2	AKT1S1_-_50380001.23-P1P2	AKT1S1_+_50380803.23-P1P2	predicted	predicted	GGGGCCGCCCGAGATCAAGA	GTATTCCACTGGAACCTCGA	AKT1S1_-_50380001.23-P1P2|AKT1S1_+_50380803.23-P1P2
AKT2	P1P2	AKT2_-_40791400.23-P1P2	AKT2_-_40791521.23-P1P2	predicted	predicted	GGAGCGAGAGCGCAAGAGCA	GAGGCGAGATGGGGCTACGC	AKT2_-_40791400.23-P1P2|AKT2_-_40791521.23-P1P2
AKT3	P1P2	AKT3_-_244013682.23-P1P2	AKT3_-_244013696.23-P1P2	predicted	predicted	GaggaggcggagACTCTACA	GCTACATGGGAATCGGATAT	AKT3_-_244013682.23-P1P2|AKT3_-_244013696.23-P1P2
AKTIP	P1P2	AKTIP_+_53537371.23-P1P2	AKTIP_-_53537444.23-P1P2	predicted	predicted	GGCGCTGTTACGTAAGGGGA	GGGCCCCCCGGGGAGGGATG	AKTIP_+_53537371.23-P1P2|AKTIP_-_53537444.23-P1P2
ALAD	P1P2	ALAD_-_116163697.23-P1P2	ALAD_-_116163783.23-P1P2	predicted	predicted	GGCCCCGCCCACACGCAACG	GTGTGCAGCGAACTGCAGGA	ALAD_-_116163697.23-P1P2|ALAD_-_116163783.23-P1P2
ALAS1	P1P2	ALAS1_+_52232034.23-P1P2	ALAS1_+_52231999.23-P1P2	predicted	predicted	GGCAGAGAGGCCCACTTCTT	GGGTGCTGCCGGGGATTCCC	ALAS1_+_52232034.23-P1P2|ALAS1_+_52231999.23-P1P2
ALAS2	P1P2	ALAS2_+_55057554.23-P1P2	ALAS2_+_55057499.23-P1P2	predicted	predicted	GGGGGAGGGGGTACACTAGA	GAGGGACTGAGATACCTTTG	ALAS2_+_55057554.23-P1P2|ALAS2_+_55057499.23-P1P2
ALB	P1	ALB_-_74269844.23-P1	ALB_-_74269825.23-P1	predicted	predicted	GTGGAGAAAACAGTTCCAGA	GATACATTGACAAGGTCTTG	ALB_-_74269844.23-P1|ALB_-_74269825.23-P1
ALB	P2	ALB_+_74274932.23-P2	ALB_-_74274959.23-P2	predicted	predicted	GAAGCTCAATTTGCACATGA	GTGTGCAAATTGAGCTTAAT	ALB_+_74274932.23-P2|ALB_-_74274959.23-P2
ALCAM	P1P2	ALCAM_-_105085416.23-P1P2	ALCAM_-_105085585.23-P1P2	predicted	predicted	GAGCCAGAGGCCTTATCACT	GTTCTCCCTGATCCCGGAGC	ALCAM_-_105085416.23-P1P2|ALCAM_-_105085585.23-P1P2
ALDH16A1	P1P2	ALDH16A1_+_49956389.23-P1P2	ALDH16A1_-_49956436.23-P1P2	predicted	predicted	GGCCCCGCCTACGTCCCCCA	GGGGTCCTAAGGAAAAAGTG	ALDH16A1_+_49956389.23-P1P2|ALDH16A1_-_49956436.23-P1P2
ALDH18A1	P1P2	ALDH18A1_+_97416589.23-P1P2	ALDH18A1_-_97416681.23-P1P2	predicted	predicted	GGGCCCGCCACGTGGAGCGC	GGGAACGCCCACGTCCCGGG	ALDH18A1_+_97416589.23-P1P2|ALDH18A1_-_97416681.23-P1P2
ALDH1A1	P1P2	ALDH1A1_+_75568128.23-P1P2	ALDH1A1_-_75568252.23-P1P2	predicted	predicted	GCTGGAGCACTGGTTTCTTA	GGCAGCTGCTCTGGCCACTA	ALDH1A1_+_75568128.23-P1P2|ALDH1A1_-_75568252.23-P1P2
ALDH1A2	P1P2	ALDH1A2_+_58358123.23-P1P2	ALDH1A2_+_58358008.23-P1P2	predicted	predicted	GAGGACTGTGGAGGCGGCGT	GAGGCTGCGCCGGGCGTCCT	ALDH1A2_+_58358123.23-P1P2|ALDH1A2_+_58358008.23-P1P2
ALDH1A3	P1	ALDH1A3_-_101419837.23-P1	ALDH1A3_+_101419822.23-P1	predicted	predicted	Gcgggcgccgggacggtccg	Gcgcgtgccgcggaccgtcc	ALDH1A3_-_101419837.23-P1|ALDH1A3_+_101419822.23-P1
ALDH1A3	P2	ALDH1A3_-_101438257.23-P2	ALDH1A3_-_101438153.23-P2	predicted	predicted	GCCAAGTTCAGCAACATCCA	GCAGTGAAGGGACGGCATCG	ALDH1A3_-_101438257.23-P2|ALDH1A3_-_101438153.23-P2
ALDH1B1	P1P2	ALDH1B1_-_38392543.23-P1P2	ALDH1B1_-_38392561.23-P1P2	predicted	predicted	GCTTGCGGAGACCCGAGGGA	GAGGGAGCGCTGAAGCGGTG	ALDH1B1_-_38392543.23-P1P2|ALDH1B1_-_38392561.23-P1P2
ALDH1L1	P1P2	ALDH1L1_-_125899564.23-P1P2	ALDH1L1_-_125899568.23-P1P2	predicted	predicted	GGAGCGCAGCGCACCCTCTC	GGCAGCGCACCCTCTCCGGG	ALDH1L1_-_125899564.23-P1P2|ALDH1L1_-_125899568.23-P1P2
ALDH1L2	P1P2	ALDH1L2_+_105478347.23-P1P2	ALDH1L2_+_105478398.23-P1P2	predicted	predicted	GGAGGGGTGCGGACTAGCAG	GCGGGGCCTTGCAGCTGGTA	ALDH1L2_+_105478347.23-P1P2|ALDH1L2_+_105478398.23-P1P2
ALDH2	P1P2	ALDH2_-_112204657.23-P1P2	ALDH2_+_112204677.23-P1P2	predicted	predicted	GCCATCCCGAGGAATGGTAG	GGCAGCCAATGGAAAggcgg	ALDH2_-_112204657.23-P1P2|ALDH2_+_112204677.23-P1P2
ALDH3A1	P1P2	ALDH3A1_+_19651748.23-P1P2	ALDH3A1_+_19652002.23-P1P2	predicted	predicted	GCCCCAAAACCTGGGCTGTA	GGAGCTGCATGCTCTCACTG	ALDH3A1_+_19651748.23-P1P2|ALDH3A1_+_19652002.23-P1P2
ALDH3A2	P1P2	ALDH3A2_-_19552011.23-P1P2	ALDH3A2_-_19552042.23-P1P2	predicted	predicted	GTGGGCGAGGCCGTGAACAG	GGGGCCGCCCAGGCCAATAG	ALDH3A2_-_19552011.23-P1P2|ALDH3A2_-_19552042.23-P1P2
ALDH3B1	P1P2	ALDH3B1_+_67777593.23-P1P2	ALDH3B1_-_67777677.23-P1P2	predicted	predicted	GAGGCTAGAGCCACACAGCA	GGAGATGTCGAGGCCCCCGA	ALDH3B1_+_67777593.23-P1P2|ALDH3B1_-_67777677.23-P1P2
ALDH3B2	P1P2	ALDH3B2_-_67442366.23-P1P2	ALDH3B2_+_67442162.23-P1P2	predicted	predicted	GAACCCCAGGGGAAGGTCAC	GGGTCCTGGCAGTGAGACAA	ALDH3B2_-_67442366.23-P1P2|ALDH3B2_+_67442162.23-P1P2
ALDH4A1	P1P2	ALDH4A1_+_19229480.23-P1P2	ALDH4A1_+_19229564.23-P1P2	predicted	predicted	GAACCCGGGGCGCACGCCAG	GGGGTCGAGGAGTCTGGTAG	ALDH4A1_+_19229480.23-P1P2|ALDH4A1_+_19229564.23-P1P2
ALDH5A1	P1P2	ALDH5A1_+_24494922.23-P1P2	ALDH5A1_+_24494972.23-P1P2	predicted	predicted	GTCGCCAGTAGATGCACCTG	GCTGGCGCGACCTTCTCCCG	ALDH5A1_+_24494922.23-P1P2|ALDH5A1_+_24494972.23-P1P2
ALDH6A1	P1P2	ALDH6A1_+_74551319.23-P1P2	ALDH6A1_-_74551337.23-P1P2	predicted	predicted	GCTACCTCCGCCTACGTCAT	GCAGCCAATGACGTAGGCGG	ALDH6A1_+_74551319.23-P1P2|ALDH6A1_-_74551337.23-P1P2
ALDH7A1	P1P2	ALDH7A1_+_125931023.23-P1P2	ALDH7A1_-_125931085.23-P1P2	predicted	predicted	GGGCTCCTCCGGAAGACCAG	GGAACAATGGGAGTGCTACA	ALDH7A1_+_125931023.23-P1P2|ALDH7A1_-_125931085.23-P1P2
ALDH8A1	P1P2	ALDH8A1_+_135271260.23-P1P2	ALDH8A1_+_135271285.23-P1P2	predicted	predicted	GGGAAGGGGGAGGCTCACTC	GTTGGTAAAGGGGAAGATGG	ALDH8A1_+_135271260.23-P1P2|ALDH8A1_+_135271285.23-P1P2
ALDH9A1	P1P2	ALDH9A1_+_165667976.23-P1P2	ALDH9A1_-_165668009.23-P1P2	predicted	predicted	GTGTGTGGGGTATGGCGGGG	GACCCCACACAGTCTCCAGG	ALDH9A1_+_165667976.23-P1P2|ALDH9A1_-_165668009.23-P1P2
ALDOA	P1P2	ALDOA_+_30076922.23-P1P2	ALDOA_+_30076925.23-P1P2	predicted	predicted	GAGGCCGCGCTAGGAAGGGG	GCAGAGGCCGCGCTAGGAAG	ALDOA_+_30076922.23-P1P2|ALDOA_+_30076925.23-P1P2
ALDOB	P1	ALDOB_-_104198369.23-P1	ALDOB_-_104198388.23-P1	predicted	predicted	Gagtcaatgatggagctcta	GgggtccaTTAAATGATACT	ALDOB_-_104198369.23-P1|ALDOB_-_104198388.23-P1
ALDOB	P2	ALDOB_+_104188075.23-P2	ALDOB_-_104188102.23-P2	predicted	predicted	GTAGTTGTGCTCAGTGGCTA	GCCACTGAGCACAACTAAAC	ALDOB_+_104188075.23-P2|ALDOB_-_104188102.23-P2
ALDOC	P1P2	ALDOC_+_26904067.23-P1P2	ALDOC_-_26904037.23-P1P2	predicted	predicted	GGGGCAGTCCCTAACAGCCA	GCACGCCCTCAGAGGCGGGG	ALDOC_+_26904067.23-P1P2|ALDOC_-_26904037.23-P1P2
ALG1	P1P2	ALG1_+_5121717.23-P1P2	ALG1_+_5121773.23-P1P2	predicted	predicted	GAGGGGCCCGGGGAACCCCC	GCAGACCGAGCCTCCGAAGT	ALG1_+_5121717.23-P1P2|ALG1_+_5121773.23-P1P2
ALG10	P1P2	ALG10_-_34175316.23-P1P2	ALG10_-_34175246.23-P1P2	predicted	predicted	GCCGGGCAATGCGATTGAGA	GAGCCACGCACCTCCCGCGC	ALG10_-_34175316.23-P1P2|ALG10_-_34175246.23-P1P2
ALG10B	P1P2	ALG10B_-_38710470.23-P1P2	ALG10B_+_38710394.23-P1P2	predicted	predicted	GTGCGCCCCGAGTAATGTGA	GGATTTCGCGAGCGCGGGAG	ALG10B_-_38710470.23-P1P2|ALG10B_+_38710394.23-P1P2
ALG11	P1P2	ALG11_+_52586390.23-P1P2	ALG11_-_52586408.23-P1P2	predicted	predicted	GCAGCCAATAGAATATGCCG	GACGCCTCGGCATATTCTAT	ALG11_+_52586390.23-P1P2|ALG11_-_52586408.23-P1P2
ALG12	P1P2	ALG12_+_50312307.23-P1P2	ALG12_+_50312186.23-P1P2	predicted	predicted	GCCGCGCCGGCCTGTCCCCC	GCGCCACGAGAGGTGACCAA	ALG12_+_50312307.23-P1P2|ALG12_+_50312186.23-P1P2
ALG13	P1P2	ALG13_+_110924278.23-P1P2	ALG13_+_110924275.23-P1P2	predicted	predicted	GGGGTGGGGCAAAAGACTAT	GTGGGGCAAAAGACTATTGG	ALG13_+_110924278.23-P1P2|ALG13_+_110924275.23-P1P2
ALG14	P1P2	ALG14_-_95538560.23-P1P2	ALG14_-_95538540.23-P1P2	predicted	predicted	GGGAGGACGCACGTCTTGGT	GTGCCGAAGCGACTCAAACG	ALG14_-_95538560.23-P1P2|ALG14_-_95538540.23-P1P2
ALG2	P1P2	ALG2_-_101984322.23-P1P2	ALG2_+_101984273.23-P1P2	predicted	predicted	GCATCAGCGCAAATCTGTGA	GAACTGACGCACGTACGGCA	ALG2_-_101984322.23-P1P2|ALG2_+_101984273.23-P1P2
ALG3	P1P2	ALG3_+_183966889.23-P1P2	ALG3_+_183967618.23-P1P2	predicted	predicted	Gggagcgtggagtgcatcag	GTCTAGGAGGGCACGGAAGG	ALG3_+_183966889.23-P1P2|ALG3_+_183967618.23-P1P2
ALG5	P1P2	ALG5_-_37573599.23-P1P2	ALG5_-_37573627.23-P1P2	predicted	predicted	GCGTGCCCTCGGCGCCCAGT	GGGAGCGCTAGGTTCCACAG	ALG5_-_37573599.23-P1P2|ALG5_-_37573627.23-P1P2
ALG6	P1P2	ALG6_+_63833196.23-P1P2	ALG6_+_63833121.23-P1P2	predicted	predicted	GCGAGCCCGTCGAGCGTGAG	GAGAGCCGATGGAACCCGAG	ALG6_+_63833196.23-P1P2|ALG6_+_63833121.23-P1P2
ALG8	P1P2	ALG8_-_77850830.23-P1P2	ALG8_-_77850757.23-P1P2	predicted	predicted	GGTCTCACCCCGGGCCGGAA	GGCGAGCGGCGCAGCCAGTC	ALG8_-_77850830.23-P1P2|ALG8_-_77850757.23-P1P2
ALG9	P1P2	ALG9_+_111742457.23-P1P2	ALG9_+_111742419.23-P1P2	predicted	predicted	GCTGAAAAGTGACGGAAAAG	GAATGGCTAGAGTTAGAAGC	ALG9_+_111742457.23-P1P2|ALG9_+_111742419.23-P1P2
ALK	P1P2	ALK_+_30144561.23-P1P2	ALK_+_30144627.23-P1P2	predicted	predicted	GGGGCGAGGCCGGACTGCGT	GGGCCTCTGCAGATTTGCAT	ALK_+_30144561.23-P1P2|ALK_+_30144627.23-P1P2
ALKBH1	P1P2	ALKBH1_-_78174484.23-P1P2	ALKBH1_+_78174342.23-P1P2	predicted	predicted	GTCAGCAGCGAGAGGTGCTG	GAGGGTATAGGCCGCGAGAT	ALKBH1_-_78174484.23-P1P2|ALKBH1_+_78174342.23-P1P2
ALKBH2	P1P2	ALKBH2_-_109531467.23-P1P2	ALKBH2_-_109531430.23-P1P2	predicted	predicted	GACGGCTGGGGTGAGAACTG	GTTCCCGTTGATCACCTGTT	ALKBH2_-_109531467.23-P1P2|ALKBH2_-_109531430.23-P1P2
ALKBH3	P1P2	ALKBH3_+_43902230.23-P1P2	ALKBH3_+_43902218.23-P1P2	predicted	predicted	GTGGAGGGCCTAATCACCGA	GTCACCGAAGGTGCTGATGA	ALKBH3_+_43902230.23-P1P2|ALKBH3_+_43902218.23-P1P2
ALKBH4	P1P2	ALKBH4_+_102105672.23-P1P2	ALKBH4_-_102105598.23-P1P2	predicted	predicted	GACAAGCGGGCCGTTGGGGA	GCGACCGGCTGGGGAAGATC	ALKBH4_+_102105672.23-P1P2|ALKBH4_-_102105598.23-P1P2
ALKBH5	P1P2	ALKBH5_+_18086824.23-P1P2	ALKBH5_-_18087034.23-P1P2	predicted	predicted	GCCCCAGGGCGCATTCACCA	GAGGGGCGGCGGACGGCAAG	ALKBH5_+_18086824.23-P1P2|ALKBH5_-_18087034.23-P1P2
ALKBH6	P1P2	ALKBH6_+_36505281.23-P1P2	ALKBH6_-_36505327.23-P1P2	predicted	predicted	GCCTCCTGCCAATGGCTCAG	GTGGGCGGGGCATCGTCGTC	ALKBH6_+_36505281.23-P1P2|ALKBH6_-_36505327.23-P1P2
ALKBH7	P1P2	ALKBH7_+_6372606.23-P1P2	ALKBH7_-_6372658.23-P1P2	predicted	predicted	GCCCGCCTGACTTACACCAG	GCCAATAAGCTCAAGAGAGG	ALKBH7_+_6372606.23-P1P2|ALKBH7_-_6372658.23-P1P2
ALKBH8	P1P2	ALKBH8_+_107436503.23-P1P2	ALKBH8_+_107436866.23-P1P2	predicted	predicted	GGGGAGGCGAAGAGGACTGT	Gagcagagggatgactcaga	ALKBH8_+_107436503.23-P1P2|ALKBH8_+_107436866.23-P1P2
ALLC	P1P2	ALLC_+_3705405.23-P1P2	ALLC_-_3705594.23-P1P2	predicted	predicted	Gaagacaggggcccttggga	GGCCGGAGGCAGCTTTGTTA	ALLC_+_3705405.23-P1P2|ALLC_-_3705594.23-P1P2
ALMS1	P1P2	ALMS1_+_73612809.23-P1P2	ALMS1_+_73612827.23-P1P2	predicted	predicted	GCGGGAACGCCTTAGGGCGG	GACGCCGCGCGAGGCCCGGC	ALMS1_+_73612809.23-P1P2|ALMS1_+_73612827.23-P1P2
ALOX12	P1P2	ALOX12_-_6899910.23-P1P2	ALOX12_+_6899154.23-P1P2	predicted	predicted	GCGGGGAGAGCTCAGTTAAT	GAGGGTGAGGCCAACGGGGT	ALOX12_-_6899910.23-P1P2|ALOX12_+_6899154.23-P1P2
ALOX12B	P1P2	ALOX12B_+_7991154.23-P1P2	ALOX12B_-_7991299.23-P1P2	predicted	predicted	GCCCTCCCGCAACTTCCCTA	GGGCAGTGAGTGACTTGCAT	ALOX12B_+_7991154.23-P1P2|ALOX12B_-_7991299.23-P1P2
ALOX15	P1P2	ALOX15_-_4545166.23-P1P2	ALOX15_-_4545050.23-P1P2	predicted	predicted	GCGGTGTCCTGGCGAGAGCA	GGTCGCTTGGGGTCGGAATG	ALOX15_-_4545166.23-P1P2|ALOX15_-_4545050.23-P1P2
ALOX15B	P1P2	ALOX15B_-_7942184.23-P1P2	ALOX15B_+_7942156.23-P1P2	predicted	predicted	GCCAACTGGGTCCCAACTCT	GTTGGGACCCAGTTGGGGTG	ALOX15B_-_7942184.23-P1P2|ALOX15B_+_7942156.23-P1P2
ALOX5	P1P2	ALOX5_-_45869553.23-P1P2	ALOX5_-_45869535.23-P1P2	predicted	predicted	GTGGGAGAGAAGTACTgcgg	GTCGGCGCCGCGTGAAGAGT	ALOX5_-_45869553.23-P1P2|ALOX5_-_45869535.23-P1P2
ALOX5AP	P1P2	ALOX5AP_+_31309673.23-P1P2	ALOX5AP_-_31309422.23-P1P2	predicted	predicted	GAACCTGCCCTGTACAGGAA	GTCGTGCTGGTCATGGTCTT	ALOX5AP_+_31309673.23-P1P2|ALOX5AP_-_31309422.23-P1P2
ALOXE3	P1P2	ALOXE3_+_8021755.23-P1P2	ALOXE3_+_8021953.23-P1P2	predicted	predicted	GAATGGGGAGGAACAGATCT	GCGTGGGGGGATCGGTGTAT	ALOXE3_+_8021755.23-P1P2|ALOXE3_+_8021953.23-P1P2
ALPI	P1P2	ALPI_+_233320596.23-P1P2	ALPI_-_233320782.23-P1P2	predicted	predicted	GTAGGCCAGGGCCCGGGTTA	GGGGTCAAGATGGACACCAG	ALPI_+_233320596.23-P1P2|ALPI_-_233320782.23-P1P2
ALPK1	P1P2	ALPK1_-_113218415.23-P1P2	ALPK1_-_113218402.23-P1P2	predicted	predicted	GCCTAAAGGGGTGTGTCTTA	GCACCGAAGCAATTCCTAAA	ALPK1_-_113218415.23-P1P2|ALPK1_-_113218402.23-P1P2
ALPK2	ENST00000361673.3	ALPK2_-_56296431.23-ENST00000361673.3	ALPK2_+_56296413.23-ENST00000361673.3	predicted	predicted	GAACCCAGACGAGCTGTCAC	GCAGCCAGTGACAGCTCGTC	ALPK2_-_56296431.23-ENST00000361673.3|ALPK2_+_56296413.23-ENST00000361673.3
ALPK3	P1P2	ALPK3_-_85360148.23-P1P2	ALPK3_-_85360218.23-P1P2	predicted	predicted	GGCAAGGCGAGGGTCAGTCA	GTCTAGCCCAAGCTGGCCAG	ALPK3_-_85360148.23-P1P2|ALPK3_-_85360218.23-P1P2
ALPL	P1	ALPL_+_21835713.23-P1	ALPL_+_21835745.23-P1	predicted	predicted	GCGGGAGCGGAGCTAGGAAC	GCGGTCGTGCCACGAGGCCA	ALPL_+_21835713.23-P1|ALPL_+_21835745.23-P1
ALPL	P2	ALPL_+_21877669.23-P2	ALPL_-_21877507.23-P2	predicted	predicted	GGCCCTAAGGAAGGTTGTGG	GGAAACgggtcccagggtac	ALPL_+_21877669.23-P2|ALPL_-_21877507.23-P2
ALPP	P1P2	ALPP_-_233243402.23-P1P2	ALPP_-_233243146.23-P1P2	predicted	predicted	GAGGGTCAAGGTGGCAACGA	GGGTGAATGATCCAGTGACA	ALPP_-_233243402.23-P1P2|ALPP_-_233243146.23-P1P2
ALPPL2	P1P2	ALPPL2_-_233271496.23-P1P2	ALPPL2_-_233271501.23-P1P2	predicted	predicted	GGGGTCAAGGTGGTAACAAG	GAAGGTGGTAACAAGGGGAG	ALPPL2_-_233271496.23-P1P2|ALPPL2_-_233271501.23-P1P2
ALS2	P1P2	ALS2_-_202645785.23-P1P2	ALS2_-_202645730.23-P1P2	predicted	predicted	GGCTCCTGGGAATTGTTCTT	GGCTGCAGGGCGACTAGCGA	ALS2_-_202645785.23-P1P2|ALS2_-_202645730.23-P1P2
ALS2CL	P1P2	ALS2CL_+_46735351.23-P1P2	ALS2CL_-_46735287.23-P1P2	predicted	predicted	GGACGCCAGAGGGAGGCCTC	GTGTTGCTCTGGAGTTGCGG	ALS2CL_+_46735351.23-P1P2|ALS2CL_-_46735287.23-P1P2
ALS2CR11	P1P2	ALS2CR11_+_202484154.23-P1P2	ALS2CR11_+_202484165.23-P1P2	predicted	predicted	GACTCGTGAGGGCTACAGGG	GGGGAGAAAAGGACTCGTGA	ALS2CR11_+_202484154.23-P1P2|ALS2CR11_+_202484165.23-P1P2
ALS2CR12	P1P2	ALS2CR12_-_202222154.23-P1P2	ALS2CR12_-_202222388.23-P1P2	predicted	predicted	GGTAGCTCCTCATTGGCTCA	GTACCAGGCAGGATCTGTGA	ALS2CR12_-_202222154.23-P1P2|ALS2CR12_-_202222388.23-P1P2
ALX1	P1P2	ALX1_+_85673913.23-P1P2	ALX1_-_85673636.23-P1P2	predicted	predicted	GAAAGCGAGCGCTGCGGCGT	GGTCACGGCGGCAATGAATC	ALX1_+_85673913.23-P1P2|ALX1_-_85673636.23-P1P2
ALX3	P1P2	ALX3_+_110613418.23-P1P2	ALX3_+_110613422.23-P1P2	predicted	predicted	GGGGCCACACGTGACGTGGA	GCACGGGGCCACACGTGACG	ALX3_+_110613418.23-P1P2|ALX3_+_110613422.23-P1P2
ALX4	P1P2	ALX4_+_44331749.23-P1P2	ALX4_-_44331728.23-P1P2	predicted	predicted	GagagagagGCCGGCGTGGA	GTGGCTGTGCACTCCTTGCC	ALX4_+_44331749.23-P1P2|ALX4_-_44331728.23-P1P2
ALYREF	P1P2	ALYREF_+_79849796.23-P1P2	ALYREF_-_79849638.23-P1P2	predicted	predicted	GCGGGCGGAGCGTGCGGGGA	GACTCGGCGGGCGCTGTTGA	ALYREF_+_79849796.23-P1P2|ALYREF_-_79849638.23-P1P2
AMACR	P1P2	AMACR_+_34008320.23-P1P2	AMACR_+_34008253.23-P1P2	predicted	predicted	GTGGCACTGGCGGTCCCGGG	GCAGGCCCGCAAAAGAGGGA	AMACR_+_34008320.23-P1P2|AMACR_+_34008253.23-P1P2
AMBN	P1P2	AMBN_-_71457849.23-P1P2	AMBN_+_71457901.23-P1P2	predicted	predicted	GGTCCCTGCACGCAATAAAA	GAAGTGAAGCAAAATGGCGA	AMBN_-_71457849.23-P1P2|AMBN_+_71457901.23-P1P2
AMBP	P1P2	AMBP_-_116840710.23-P1P2	AMBP_-_116840734.23-P1P2	predicted	predicted	GTGGGGTCAGCAGTACCAAG	GGGGATGGCTGCTTCAGAAG	AMBP_-_116840710.23-P1P2|AMBP_-_116840734.23-P1P2
AMBRA1	P1P2	AMBRA1_-_46615694.23-P1P2	AMBRA1_+_46615722.23-P1P2	predicted	predicted	GTCAACTCCTACTCAAGGTC	GAACCCGTGGCTTATGATCT	AMBRA1_-_46615694.23-P1P2|AMBRA1_+_46615722.23-P1P2
AMD1	P1P2	AMD1_+_111195777.23-P1P2	AMD1_-_111195912.23-P1P2	predicted	predicted	GCTCTGGCCGGCTCCTGAGT	GCAGCAGCTATAGGCCGTGG	AMD1_+_111195777.23-P1P2|AMD1_-_111195912.23-P1P2
AMDHD1	P1P2	AMDHD1_+_96336776.23-P1P2	AMDHD1_+_96336792.23-P1P2	predicted	predicted	GTGAGGGCACCCGGAGTGTT	GTCAAGGGTTGGCTGGGTGA	AMDHD1_+_96336776.23-P1P2|AMDHD1_+_96336792.23-P1P2
AMDHD2	P1P2	AMDHD2_+_2570158.23-P1P2	AMDHD2_-_2570299.23-P1P2	predicted	predicted	GGCCACGGGCCCGGCGGTGA	GCGGGCGCTGCCGGTCACGT	AMDHD2_+_2570158.23-P1P2|AMDHD2_-_2570299.23-P1P2
AMELX	P1P2	AMELX_-_11311239.23-P1P2	AMELX_+_11311330.23-P1P2	predicted	predicted	GAGAACTGAGGAAAAGGCGA	GGGGCAATAATAGGTTTAAC	AMELX_-_11311239.23-P1P2|AMELX_+_11311330.23-P1P2
AMELY	P1P2	AMELY_-_6742501.23-P1P2	AMELY_-_6742211.23-P1P2	predicted	predicted	GAAAGCGCCAAAAGTCTCTC	GGCAACCATGGCTAAATATA	AMELY_-_6742501.23-P1P2|AMELY_-_6742211.23-P1P2
AMER1	P1P2	AMER1_-_63425821.23-P1P2	AMER1_-_63425815.23-P1P2	predicted	predicted	GGGTGCGGAACCACTGGCTG	GGGAGAGGGTGCGGAACCAC	AMER1_-_63425821.23-P1P2|AMER1_-_63425815.23-P1P2
AMER2	P1P2	AMER2_-_25746674.23-P1P2	AMER2_+_25745889.23-P1P2	predicted	predicted	GCCCCTCCCCCATACCACCA	GTATATAAGCCCTTGCGGGA	AMER2_-_25746674.23-P1P2|AMER2_+_25745889.23-P1P2
AMER3	P1P2	AMER3_-_131512874.23-P1P2	AMER3_-_131512724.23-P1P2	predicted	predicted	GAGGGAGCCCACCAAGCTCA	GGGTAGGTCACCCAAGGGTG	AMER3_-_131512874.23-P1P2|AMER3_-_131512724.23-P1P2
AMFR	P1P2	AMFR_-_56459558.23-P1P2	AMFR_+_56459545.23-P1P2	predicted	predicted	GCGGTCGCGCCGCCGCCTAG	GGGCTACGCCCGCTAGGCGG	AMFR_-_56459558.23-P1P2|AMFR_+_56459545.23-P1P2
AMH	P1P2	AMH_-_2248401.23-P1P2	AMH_+_2248422.23-P1P2	predicted	predicted	GCCTCCCGGGGTCCATCCGT	GTTGAGGGGTGAACTCCCGG	AMH_-_2248401.23-P1P2|AMH_+_2248422.23-P1P2
AMHR2	P1P2	AMHR2_+_53818764.23-P1P2	AMHR2_-_53818742.23-P1P2	predicted	predicted	GAAAGCGTGGGGCGGGAGTA	GGGGCCCAGGTTAGGATGAG	AMHR2_+_53818764.23-P1P2|AMHR2_-_53818742.23-P1P2
AMICA1	P1P2	AMICA1_+_118095946.23-P1P2	AMICA1_+_118096258.23-P1P2	predicted	predicted	GAGGGCTTGTCATCTAAAAG	GTCACCCAAGAGGTTCTCTA	AMICA1_+_118095946.23-P1P2|AMICA1_+_118096258.23-P1P2
AMIGO1	P1P2	AMIGO1_+_110052374.23-P1P2	AMIGO1_+_110052467.23-P1P2	predicted	predicted	Gcgcacgcgccccgaggctc	GTCCGGAGCTCGCTGGTTGA	AMIGO1_+_110052374.23-P1P2|AMIGO1_+_110052467.23-P1P2
AMIGO2	P1P2	AMIGO2_+_47473827.23-P1P2	AMIGO2_-_47474050.23-P1P2	predicted	predicted	GAGGCCGCGGGGCGGTATGA	GGGGTCCAGGAAGGCTAAAG	AMIGO2_+_47473827.23-P1P2|AMIGO2_-_47474050.23-P1P2
AMIGO3	P1	AMIGO3_+_49761525.23-P1	AMIGO3_-_49761472.23-P1	predicted	predicted	GGTCCCGGCCCGGGTCTCCA	GGCCGCCGGCGTCGGAACGT	AMIGO3_+_49761525.23-P1|AMIGO3_-_49761472.23-P1
AMIGO3	P2	AMIGO3_+_49757210.23-P2	AMIGO3_-_49757247.23-P2	predicted	predicted	GCGGGGCCATTGGGCACAAA	GGCCCCGCATGACCGCCAGA	AMIGO3_+_49757210.23-P2|AMIGO3_-_49757247.23-P2
AMMECR1	P1P2	AMMECR1_+_109561526.23-P1P2	AMMECR1_+_109561468.23-P1P2	predicted	predicted	GgctCAGAAGAGGCACGAGT	GGGAGCGCGCACCGAGGCGG	AMMECR1_+_109561526.23-P1P2|AMMECR1_+_109561468.23-P1P2
AMMECR1L	P1P2	AMMECR1L_-_128644108.23-P1P2	AMMECR1L_-_128643989.23-P1P2	predicted	predicted	GGGGATCCGCGTCGGGTTGT	GGGCGCCCGGCTGTCAAAAC	AMMECR1L_-_128644108.23-P1P2|AMMECR1L_-_128643989.23-P1P2
AMN	P1	AMN_-_103388871.23-P1	AMN_-_103388906.23-P1	predicted	predicted	GTGCAGGGGCGGGTAAGGGG	GTCCCAGGGGCCTGAAGAGT	AMN_-_103388871.23-P1|AMN_-_103388906.23-P1
AMN	P2	AMN_-_103394897.23-P2	AMN_-_103394926.23-P2	predicted	predicted	GTCTGGAAAGGCATGTTCAG	GTGGAGGGAAGGCGCGTCGA	AMN_-_103394897.23-P2|AMN_-_103394926.23-P2
AMN1	P1P2	AMN1_-_31882157.23-P1P2	AMN1_-_31882205.23-P1P2	predicted	predicted	GAGGGCTGCGCGGAAGAGGC	GAACTCGGATGCAACGTGAC	AMN1_-_31882157.23-P1P2|AMN1_-_31882205.23-P1P2
AMOT	P1P2	AMOT_-_112084147.23-P1P2	AMOT_-_112084166.23-P1P2	predicted	predicted	GCGGCGGGAGGGGTGGACGA	GGGGAGGAAGGCGGAGTAGA	AMOT_-_112084147.23-P1P2|AMOT_-_112084166.23-P1P2
AMOTL1	P1P2	AMOTL1_-_94501403.23-P1P2	AMOTL1_-_94501411.23-P1P2	predicted	predicted	GGCGGCGGGTGTCTGCAGAC	GTGTCTGCAGACGGGCTCTA	AMOTL1_-_94501403.23-P1P2|AMOTL1_-_94501411.23-P1P2
AMOTL2	P1P2	AMOTL2_+_134093466.23-P1P2	AMOTL2_+_134093618.23-P1P2	predicted	predicted	GGCGCCGCCTCCCCGGAGGA	GTGGGAGTGGAGGCGATAAT	AMOTL2_+_134093466.23-P1P2|AMOTL2_+_134093618.23-P1P2
AMPD1	P1P2	AMPD1_-_115238340.23-P1P2	AMPD1_+_115238690.23-P1P2	predicted	predicted	GTGGGATTAGAAGATATCTG	GAAGTGGTAACTGGATACTC	AMPD1_-_115238340.23-P1P2|AMPD1_+_115238690.23-P1P2
AMPD2	P1	AMPD2_-_110162342.23-P1	AMPD2_+_110162329.23-P1	predicted	predicted	GggaACTGGCCCAAGACCCA	GTGAGCCGACCCTGGGTCTT	AMPD2_-_110162342.23-P1|AMPD2_+_110162329.23-P1
AMPD2	P2	AMPD2_-_110163621.23-P2	AMPD2_-_110163576.23-P2	predicted	predicted	GATGGAGGCCCCACTCCCCG	GGTCACTCCTGGGACTGAGG	AMPD2_-_110163621.23-P2|AMPD2_-_110163576.23-P2
AMPD3	P1P2	AMPD3_+_10476545.23-P1P2	AMPD3_-_10476633.23-P1P2	predicted	predicted	GTGCACAGAGCAGTATTACA	GGGACATGCGGAGGTGACTC	AMPD3_+_10476545.23-P1P2|AMPD3_-_10476633.23-P1P2
AMPH	P1P2	AMPH_-_38671167.23-P1P2	AMPH_-_38671151.23-P1P2	predicted	predicted	Ggggcgggatgcgtcgggac	Gtaaagcgacagagcggggg	AMPH_-_38671167.23-P1P2|AMPH_-_38671151.23-P1P2
AMT	P1P2	AMT_+_49460075.23-P1P2	AMT_-_49460021.23-P1P2	predicted	predicted	GAGTCAGCCGAAAGAGCTGG	GGGGGCGTGGGCAGCCCCAA	AMT_+_49460075.23-P1P2|AMT_-_49460021.23-P1P2
AMTN	P1P2	AMTN_-_71384177.23-P1P2	AMTN_-_71384121.23-P1P2	predicted	predicted	GACCCACCTAATGAAGTGTT	GGAAACACCTTCTATTCAAA	AMTN_-_71384177.23-P1P2|AMTN_-_71384121.23-P1P2
AMY1A	ENST00000370083.4	AMY1A_+_104198208.23-ENST00000370083.4	AMY1A_-_104197943.23-ENST00000370083.4	predicted	predicted	GGGTATGTACAGATACCAAG	Ggtcagggagaaacagaata	AMY1A_+_104198208.23-ENST00000370083.4|AMY1A_-_104197943.23-ENST00000370083.4
AMY1B	ENST00000330330.5,ENST00000370080.3	AMY1B_+_104239265.23-ENST00000330330.5,ENST00000370080.3	AMY1B_+_104239269.23-ENST00000330330.5,ENST00000370080.3	predicted	predicted	Ggggagaaacagaatacgga	Ggtcagggagaaacagaata	AMY1B_+_104239265.23-ENST00000330330.5,ENST00000370080.3|AMY1B_+_104239269.23-ENST00000330330.5,ENST00000370080.3
AMY1C	ENST00000370079.3	AMY1C_-_104292527.23-ENST00000370079.3	AMY1C_-_104292537.23-ENST00000370079.3	predicted	predicted	GTGTTCTGAGATTTATCTAG	GTTTATCTAGAGGCTGGGAA	AMY1C_-_104292527.23-ENST00000370079.3|AMY1C_-_104292537.23-ENST00000370079.3
AMY2A	P1P2	AMY2A_+_104159426.23-P1P2	AMY2A_-_104159041.23-P1P2	predicted	predicted	GCAGACTCACCGAGCCAGAC	Gactacattcactgctggtc	AMY2A_+_104159426.23-P1P2|AMY2A_-_104159041.23-P1P2
AMY2B	P1P2	AMY2B_+_104104177.23-P1P2	AMY2B_-_104104190.23-P1P2	predicted	predicted	GTTAAAGACCCGATTGGCAT	GAACCCAGCCCTATGCCAAT	AMY2B_+_104104177.23-P1P2|AMY2B_-_104104190.23-P1P2
AMZ1	P1P2	AMZ1_+_2727367.23-P1P2	AMZ1_-_2727665.23-P1P2	predicted	predicted	GTGAACGAGGCCACCAGGTG	GCCCCTGCCCGGGTGTTTCT	AMZ1_+_2727367.23-P1P2|AMZ1_-_2727665.23-P1P2
AMZ2	P1P2	AMZ2_-_66244154.23-P1P2	AMZ2_-_66244075.23-P1P2	predicted	predicted	Ggcgcggcgcgtggcgtaag	GCAGGCGGCCGCACGCTCAG	AMZ2_-_66244154.23-P1P2|AMZ2_-_66244075.23-P1P2
ANAPC1	P1P2	ANAPC1_-_112641835.23-P1P2	ANAPC1_-_112641861.23-P1P2	predicted	predicted	GCTGGCGCCTGCGCTGTTGA	GCCGCGGCGGGTTACAACTT	ANAPC1_-_112641835.23-P1P2|ANAPC1_-_112641861.23-P1P2
ANAPC10	P1P2	ANAPC10_+_146019651.23-P1P2	ANAPC10_+_146019378.23-P1P2	predicted	predicted	GCCACCTAAGGCCTAACCAA	GCGGAACCCTGGAGGTAGGT	ANAPC10_+_146019651.23-P1P2|ANAPC10_+_146019378.23-P1P2
ANAPC11	P1P2	ANAPC11_-_79849458.23-P1P2	ANAPC11_-_79849498.23-P1P2	predicted	predicted	GCGGGCGCGGAATCGGGCAT	GCACGCCGGCACGTCACTTC	ANAPC11_-_79849458.23-P1P2|ANAPC11_-_79849498.23-P1P2
ANAPC13	P1P2	ANAPC13_-_134204934.23-P1P2	ANAPC13_-_134205066.23-P1P2	predicted	predicted	GTGCAGGGGAAGTCTGGAGA	GTAACGGCGGGAAGGCTCAG	ANAPC13_-_134204934.23-P1P2|ANAPC13_-_134205066.23-P1P2
ANAPC15	P1P2	ANAPC15_+_71823801.23-P1P2	ANAPC15_+_71823888.23-P1P2	predicted	predicted	GCGGGAGCGGGGAAAACAAA	GCAAGGCGGGGCAGATAGGT	ANAPC15_+_71823801.23-P1P2|ANAPC15_+_71823888.23-P1P2
ANAPC16	P1P2	ANAPC16_+_73975746.23-P1P2	ANAPC16_+_73975684.23-P1P2	predicted	predicted	GCGCGCGCCCGTGCCGTGGT	GCGCTCGCGTAGAGGAATTC	ANAPC16_+_73975746.23-P1P2|ANAPC16_+_73975684.23-P1P2
ANAPC2	P1P2	ANAPC2_+_140083098.23-P1P2	ANAPC2_-_140083145.23-P1P2	predicted	predicted	GCCTGCGCACGACTCCCCCA	GGACAGCGCTGCTTCCGCGG	ANAPC2_+_140083098.23-P1P2|ANAPC2_-_140083145.23-P1P2
ANAPC4	P1P2	ANAPC4_+_25378785.23-P1P2	ANAPC4_+_25378708.23-P1P2	predicted	predicted	GCGGGGCGCGCACCGGTCTT	Gaggagcgaggggcggatcg	ANAPC4_+_25378785.23-P1P2|ANAPC4_+_25378708.23-P1P2
ANAPC5	P1P2	ANAPC5_-_121790355.23-P1P2	ANAPC5_-_121790415.23-P1P2	predicted	predicted	GAATGTACAAGAGTGCGGGG	GCGAGTGGGAGCAGGTTCCC	ANAPC5_-_121790355.23-P1P2|ANAPC5_-_121790415.23-P1P2
ANAPC7	P1P2	ANAPC7_+_110841969.23-P1P2	ANAPC7_-_110841537.23-P1P2	predicted	predicted	GGAACCAAGGAGTTCCCCCA	GGGCGTCGCCGGGGTCCATC	ANAPC7_+_110841969.23-P1P2|ANAPC7_-_110841537.23-P1P2
ANG	P1P2	ANG_-_21152632.23-P1P2	ANG_+_21152474.23-P1P2	predicted	predicted	GGCTGCGGCGCCAGCTCCAA	GAGAGCAGATGGCGGGAAAC	ANG_-_21152632.23-P1P2|ANG_+_21152474.23-P1P2
ANGEL1	P1P2	ANGEL1_-_77279312.23-P1P2	ANGEL1_+_77279344.23-P1P2	predicted	predicted	GTATTGGGAGCGCAGGTCTA	GAGGGGTGGCTAGTTGCCAT	ANGEL1_-_77279312.23-P1P2|ANGEL1_+_77279344.23-P1P2
ANGEL2	P1P2	ANGEL2_+_213188944.23-P1P2	ANGEL2_+_213188928.23-P1P2	predicted	predicted	GGGGAAGAGGCCGGTCAGTA	GGTAGGGCTGGGTACTCGGA	ANGEL2_+_213188944.23-P1P2|ANGEL2_+_213188928.23-P1P2
ANGPT1	P1P2	ANGPT1_+_108510351.23-P1P2	ANGPT1_-_108510263.23-P1P2	predicted	predicted	GGGCTCAAGGCAATTGTCTG	GTGAGTGTGCCCCTATACTA	ANGPT1_+_108510351.23-P1P2|ANGPT1_-_108510263.23-P1P2
ANGPT2	P1P2	ANGPT2_-_6420833.23-P1P2	ANGPT2_+_6420856.23-P1P2	predicted	predicted	GGCAGCCAGACATGTGTAGT	GACCCCCTACAGGAAGATAA	ANGPT2_-_6420833.23-P1P2|ANGPT2_+_6420856.23-P1P2
ANGPT4	P1P2	ANGPT4_+_897135.23-P1P2	ANGPT4_+_897141.23-P1P2	predicted	predicted	GTGGTGCACGCTTAGGGTAA	GCAAGGTTGGTGCACGCTTA	ANGPT4_+_897135.23-P1P2|ANGPT4_+_897141.23-P1P2
ANGPTL1	P1P2	ANGPTL1_-_178840406.23-P1P2	ANGPTL1_+_178840328.23-P1P2	predicted	predicted	GTGTGTGCAGGTTGAAGGAA	GGATCCCACCCCCCTATTTA	ANGPTL1_-_178840406.23-P1P2|ANGPTL1_+_178840328.23-P1P2
ANGPTL2	P1P2	ANGPTL2_+_129885062.23-P1P2	ANGPTL2_+_129885032.23-P1P2	predicted	predicted	GGGGCGGCCCGCCTCTGTCT	GGAGGCCCGGAGCCTTTCTG	ANGPTL2_+_129885062.23-P1P2|ANGPTL2_+_129885032.23-P1P2
ANGPTL3	P1P2	ANGPTL3_+_63063126.23-P1P2	ANGPTL3_-_63063076.23-P1P2	predicted	predicted	GTGCCCAGAAAAGGTAAGGT	GTCTAACTCAATGTGGAAGA	ANGPTL3_+_63063126.23-P1P2|ANGPTL3_-_63063076.23-P1P2
ANGPTL4	P1P2	ANGPTL4_-_8428910.23-P1P2	ANGPTL4_+_8428727.23-P1P2	predicted	predicted	GCCCCAGCCCGCAGACTACC	GCCGCCCCCGCCTTACCCAG	ANGPTL4_-_8428910.23-P1P2|ANGPTL4_+_8428727.23-P1P2
ANGPTL5	P1P2	ANGPTL5_+_101778823.23-P1P2	ANGPTL5_+_101778759.23-P1P2	predicted	predicted	GAAAATGTCAGGATCTCCAG	GCATGGAAACTAGTAAGTTT	ANGPTL5_+_101778823.23-P1P2|ANGPTL5_+_101778759.23-P1P2
ANGPTL6	P1P2	ANGPTL6_-_10213594.23-P1P2	ANGPTL6_+_10213602.23-P1P2	predicted	predicted	GGCAGAGCCCAGAGCGTGGG	GATCACGCCTGGCTGCCCCA	ANGPTL6_-_10213594.23-P1P2|ANGPTL6_+_10213602.23-P1P2
ANGPTL7	P1P2	ANGPTL7_+_11249280.23-P1P2	ANGPTL7_+_11249260.23-P1P2	predicted	predicted	GGCCTGTTGGGTGAAGTCAG	GGGCAACTTAGGCCAGAGGA	ANGPTL7_+_11249280.23-P1P2|ANGPTL7_+_11249260.23-P1P2
ANHX	P1P2	ANHX_-_133812605.23-P1P2	ANHX_+_133812558.23-P1P2	predicted	predicted	GGGAGCTGAGGGGTCCGTGG	GGACTCCGCGGTCGCATCGG	ANHX_-_133812605.23-P1P2|ANHX_+_133812558.23-P1P2
ANK1	P1P2	ANK1_+_41655318.23-P1P2	ANK1_-_41655334.23-P1P2	predicted	predicted	GGGCAACCAGGGGTCCGCGC	GCTCGGCCGGCGCGGACCCC	ANK1_+_41655318.23-P1P2|ANK1_-_41655334.23-P1P2
ANK2	ENST00000264366.6	ANK2_+_113970752.23-ENST00000264366.6	ANK2_+_113970747.23-ENST00000264366.6	predicted	predicted	GGAAGGGGCGCGCACTGGGA	GGGCGCGCACTGGGAGGGTA	ANK2_+_113970752.23-ENST00000264366.6|ANK2_+_113970747.23-ENST00000264366.6
ANK3	P1P2	ANK3_-_62149650.23-P1P2	ANK3_-_62149663.23-P1P2	predicted	predicted	GTAAGTGATTCCTCGGAAGG	GGGAAGGGGGAATGCTGCAA	ANK3_-_62149650.23-P1P2|ANK3_-_62149663.23-P1P2
ANKAR	P1P2	ANKAR_+_190539178.23-P1P2	ANKAR_+_190539112.23-P1P2	predicted	predicted	GCGGCGCCCGGCCCCTTGGC	GTAGTCCAGCGGCATGCCGT	ANKAR_+_190539178.23-P1P2|ANKAR_+_190539112.23-P1P2
ANKDD1A	P1P2	ANKDD1A_-_65203932.23-P1P2	ANKDD1A_-_65203791.23-P1P2	predicted	predicted	GGCCTCGGGCGCGGAGGGGT	GAGTCCCGAGAGGCGCGAGG	ANKDD1A_-_65203932.23-P1P2|ANKDD1A_-_65203791.23-P1P2
ANKDD1B	P1P2	ANKDD1B_+_74907182.23-P1P2	ANKDD1B_-_74907227.23-P1P2	predicted	predicted	GGTGCTAAGGTTTGGTTCTC	GTGCACGCCACACCTGAGGG	ANKDD1B_+_74907182.23-P1P2|ANKDD1B_-_74907227.23-P1P2
ANKEF1	P1P2	ANKEF1_+_10015476.23-P1P2	ANKEF1_+_10015613.23-P1P2	predicted	predicted	GTGGCCGGCCTGGGCGGGAT	GCAACCGCAGCGTGCGCGGT	ANKEF1_+_10015476.23-P1P2|ANKEF1_+_10015613.23-P1P2
ANKFN1	P1P2	ANKFN1_+_54230660.23-P1P2	ANKFN1_+_54230655.23-P1P2	predicted	predicted	GGGCAGGGGAAGTGCCACAC	GGGGAAGTGCCACACAGGCT	ANKFN1_+_54230660.23-P1P2|ANKFN1_+_54230655.23-P1P2
ANKFY1	P1P2	ANKFY1_-_4167356.23-P1P2	ANKFY1_-_4167368.23-P1P2	predicted	predicted	GCGGCAAAAGGCGGAGCCGA	GGAGCCGAGGGTAGGAAAGT	ANKFY1_-_4167356.23-P1P2|ANKFY1_-_4167368.23-P1P2
ANKH	P1P2	ANKH_+_14872036.23-P1P2	ANKH_-_14871957.23-P1P2	predicted	predicted	GGCAGGCGACGGCACAGGAA	GgccgccCGGAGGAAATcag	ANKH_+_14872036.23-P1P2|ANKH_-_14871957.23-P1P2
ANKHD1	P1P2	ANKHD1_-_139781274.23-P1P2	ANKHD1_+_139781256.23-P1P2	predicted	predicted	GCAACCGCCTAGGCCTGCGC	GTGACCCGCGCAGGCCTAGG	ANKHD1_-_139781274.23-P1P2|ANKHD1_+_139781256.23-P1P2
ANKHD1-EIF4EBP3	P1P2	ANKHD1-EIF4EBP3_-_139781274.23-P1P2	ANKHD1-EIF4EBP3_+_139781256.23-P1P2	predicted	predicted	GCAACCGCCTAGGCCTGCGC	GTGACCCGCGCAGGCCTAGG	ANKHD1-EIF4EBP3_-_139781274.23-P1P2|ANKHD1-EIF4EBP3_+_139781256.23-P1P2
ANKIB1	P1P2	ANKIB1_+_91875121.23-P1P2	ANKIB1_-_91875080.23-P1P2	predicted	predicted	GGTGCTGAGGTGCGAGGAGA	GCCCCAAAAGCTCAGGTCTC	ANKIB1_+_91875121.23-P1P2|ANKIB1_-_91875080.23-P1P2
ANKK1	P1P2	ANKK1_-_113258257.23-P1P2	ANKK1_-_113258362.23-P1P2	predicted	predicted	GAAACTGGATCCAACTTCTC	GGAAATGCGAGGGCTTCGGA	ANKK1_-_113258257.23-P1P2|ANKK1_-_113258362.23-P1P2
ANKLE1	P1P2	ANKLE1_-_17392544.23-P1P2	ANKLE1_+_17392500.23-P1P2	predicted	predicted	GCGGGTGTCAAGGGCCCCTG	GAGGCGCTCAAGCAGGGTCT	ANKLE1_-_17392544.23-P1P2|ANKLE1_+_17392500.23-P1P2
ANKLE2	P1P2	ANKLE2_+_133338404.23-P1P2	ANKLE2_+_133338563.23-P1P2	predicted	predicted	Gcggggcgcgggcttctcgg	GcccgcccgcTTGGGTCCCA	ANKLE2_+_133338404.23-P1P2|ANKLE2_+_133338563.23-P1P2
ANKMY1	P1P2	ANKMY1_+_241500540.23-P1P2	ANKMY1_-_241500620.23-P1P2	predicted	predicted	GCGCCCGGAAAACTCGTCCC	GGGGCGGGTCTCTCTCGTGA	ANKMY1_+_241500540.23-P1P2|ANKMY1_-_241500620.23-P1P2
ANKMY2	P1P2	ANKMY2_+_16685697.23-P1P2	ANKMY2_-_16685505.23-P1P2	predicted	predicted	GCAGACTGCGCCACTCCCGG	GATCGCCATTGGAGCAACCT	ANKMY2_+_16685697.23-P1P2|ANKMY2_-_16685505.23-P1P2
ANKRA2	P1P2	ANKRA2_+_72861490.23-P1P2	ANKRA2_-_72861610.23-P1P2	predicted	predicted	GGGGCGGGGCGATCTGGAGT	GGGTTCGCTGTGTGTGTCGC	ANKRA2_+_72861490.23-P1P2|ANKRA2_-_72861610.23-P1P2
ANKRD1	P1P2	ANKRD1_+_92680912.23-P1P2	ANKRD1_-_92680939.23-P1P2	predicted	predicted	GGGGGGTGGGAGTGTTACTT	GTAACACTCCCACCCCCATT	ANKRD1_+_92680912.23-P1P2|ANKRD1_-_92680939.23-P1P2
ANKRD10	P1P2	ANKRD10_+_111567513.23-P1P2	ANKRD10_-_111567561.23-P1P2	predicted	predicted	GCGGCGGCTCCAGAGGTCCG	GGGGGCGGGGCTTGAGCCGG	ANKRD10_+_111567513.23-P1P2|ANKRD10_-_111567561.23-P1P2
ANKRD11	P1P2	ANKRD11_+_89557185.23-P1P2	ANKRD11_-_89557198.23-P1P2	predicted	predicted	GGACCCTGCCCAATCGTTAC	GAGGACGTCCCGGTAACGAT	ANKRD11_+_89557185.23-P1P2|ANKRD11_-_89557198.23-P1P2
ANKRD12	P1P2	ANKRD12_-_9136568.23-P1P2	ANKRD12_+_9136505.23-P1P2	predicted	predicted	GCACTAGTCCGAGTGGGGCG	GACACTATCCGACAAAGGAG	ANKRD12_-_9136568.23-P1P2|ANKRD12_+_9136505.23-P1P2
ANKRD13A	P1P2	ANKRD13A_+_110436941.23-P1P2	ANKRD13A_-_110437010.23-P1P2	predicted	predicted	GCCATTGGCTCTGAAGTCAG	GCATGGGGCTACTGGAGCAG	ANKRD13A_+_110436941.23-P1P2|ANKRD13A_-_110437010.23-P1P2
ANKRD13B	P1P2	ANKRD13B_+_27919958.23-P1P2	ANKRD13B_+_27920043.23-P1P2	predicted	predicted	GCGGGGCCCTGACGCCAGGT	GGGTGGCAGGTGGCCGAAGA	ANKRD13B_+_27919958.23-P1P2|ANKRD13B_+_27920043.23-P1P2
ANKRD13C	P1P2	ANKRD13C_+_70820563.23-P1P2	ANKRD13C_+_70820513.23-P1P2	predicted	predicted	GGGGAGTGCGGGTTCGGGGT	GCGGAAACACACTGCCTCGG	ANKRD13C_+_70820563.23-P1P2|ANKRD13C_+_70820513.23-P1P2
ANKRD13D	P1P2	ANKRD13D_-_67056460.23-P1P2	ANKRD13D_-_67055968.23-P1P2	predicted	predicted	GCACGCGCGTGCACTACCGA	GGAGGCCTGCACCCTAGTTC	ANKRD13D_-_67056460.23-P1P2|ANKRD13D_-_67055968.23-P1P2
ANKRD16	P1P2	ANKRD16_-_5932023.23-P1P2	ANKRD16_-_5932003.23-P1P2	predicted	predicted	GGGGCGTGGCCCGGTAGCTG	GCCCGAGCGGAAGCGCGGAT	ANKRD16_-_5932023.23-P1P2|ANKRD16_-_5932003.23-P1P2
ANKRD17	P1P2	ANKRD17_+_74124717.23-P1P2	ANKRD17_-_74124672.23-P1P2	predicted	predicted	GTGTCCCCGCCGTTCCCCTT	GCGGGTGTCGGGAGAACCAG	ANKRD17_+_74124717.23-P1P2|ANKRD17_-_74124672.23-P1P2
ANKRD18A	ENST00000564591.1,ENST00000566717.2	ANKRD18A_-_38577748.23-ENST00000564591.1,ENST00000566717.2	ANKRD18A_+_38577609.23-ENST00000564591.1,ENST00000566717.2	predicted	predicted	GTTTTTCTAGAACTCTACGA	GGAATTTGATGATTAAGACC	ANKRD18A_-_38577748.23-ENST00000564591.1,ENST00000566717.2|ANKRD18A_+_38577609.23-ENST00000564591.1,ENST00000566717.2
ANKRD18B	P1P2	ANKRD18B_-_33524082.23-P1P2	ANKRD18B_+_33524166.23-P1P2	predicted	predicted	GAGTCACGGCCAGGCGGGAA	GAGCTCGCGTGGCCCGCAGA	ANKRD18B_-_33524082.23-P1P2|ANKRD18B_+_33524166.23-P1P2
ANKRD2	P1P2	ANKRD2_-_99332343.23-P1P2	ANKRD2_+_99332117.23-P1P2	predicted	predicted	GAGTGCCCTCCGGCTCTAAT	GAGGGCCTGAAAACCAAACG	ANKRD2_-_99332343.23-P1P2|ANKRD2_+_99332117.23-P1P2
ANKRD20A1	ENST00000377477.2	ANKRD20A1_-_67926577.23-ENST00000377477.2	ANKRD20A1_+_67926706.23-ENST00000377477.2	predicted	predicted	GGGACCGTCTTCTGGGAGCT	GctccGCTATTTCAAATCTA	ANKRD20A1_-_67926577.23-ENST00000377477.2|ANKRD20A1_+_67926706.23-ENST00000377477.2
ANKRD20A2	ENST00000377601.2	ANKRD20A2_+_42367797.23-ENST00000377601.2	ANKRD20A2_-_42367776.23-ENST00000377601.2	predicted	predicted	GAGGGATGGAGGCAGAGTCA	GGTGGCACTGGCAGCAGTGA	ANKRD20A2_+_42367797.23-ENST00000377601.2|ANKRD20A2_-_42367776.23-ENST00000377601.2
ANKRD20A3	ENST00000254835.2	ANKRD20A3_-_43134062.23-ENST00000254835.2	ANKRD20A3_+_43133799.23-ENST00000254835.2	predicted	predicted	GTCTGGCCCTGAAATCTGTG	GCTGCTGGCGCGCGCCTCTA	ANKRD20A3_-_43134062.23-ENST00000254835.2|ANKRD20A3_+_43133799.23-ENST00000254835.2
ANKRD20A4	ENST00000357336.3	ANKRD20A4_+_69381418.23-ENST00000357336.3	ANKRD20A4_-_69381287.23-ENST00000357336.3	predicted	predicted	GGGGATGGAGGCAGAGTCAG	GAGGAGCGGACCTTGAGGCC	ANKRD20A4_+_69381418.23-ENST00000357336.3|ANKRD20A4_-_69381287.23-ENST00000357336.3
ANKRD22	P1P2	ANKRD22_+_90611898.23-P1P2	ANKRD22_-_90611862.23-P1P2	predicted	predicted	GTGGAAAAGCGTTACTTGTT	GTGTGAGAGCCACACGTGTC	ANKRD22_+_90611898.23-P1P2|ANKRD22_-_90611862.23-P1P2
ANKRD23	P1	ANKRD23_+_97523806.23-P1	ANKRD23_+_97523841.23-P1	predicted	predicted	GACGCCGAGCGGCCAGATCA	GTTGGCGAGAAGGCGGGACT	ANKRD23_+_97523806.23-P1|ANKRD23_+_97523841.23-P1
ANKRD23	P2	ANKRD23_-_97510113.23-P2	ANKRD23_-_97509864.23-P2	predicted	predicted	GCCTGGGCCTCCATGTTGTA	GCCCTGGGCCAGATGACTCT	ANKRD23_-_97510113.23-P2|ANKRD23_-_97509864.23-P2
ANKRD24	P1P2	ANKRD24_+_4198277.23-P1P2	ANKRD24_+_4198128.23-P1P2	predicted	predicted	GctccccCACGGGATGGAAT	GGCCGCCGGCTGCATCTCCA	ANKRD24_+_4198277.23-P1P2|ANKRD24_+_4198128.23-P1P2
ANKRD26	P1P2	ANKRD26_-_27389482.23-P1P2	ANKRD26_-_27389532.23-P1P2	predicted	predicted	GCGTGCGCACGAAGGCCCAG	GGCCCAGACCTCGCAAATCT	ANKRD26_-_27389482.23-P1P2|ANKRD26_-_27389532.23-P1P2
ANKRD27	P1P2	ANKRD27_-_33166289.23-P1P2	ANKRD27_+_33166090.23-P1P2	predicted	predicted	GCGCGTGCCCAGAACGTGAG	GCCACGGCGGAGTAAGGGGT	ANKRD27_-_33166289.23-P1P2|ANKRD27_+_33166090.23-P1P2
ANKRD28	P1P2	ANKRD28_+_15839651.23-P1P2	ANKRD28_+_15839433.23-P1P2	predicted	predicted	GAGTACACCAGATTTCCTTG	GACTAGGCATTTCATCCTGT	ANKRD28_+_15839651.23-P1P2|ANKRD28_+_15839433.23-P1P2
ANKRD29	P1P2	ANKRD29_+_21243085.23-P1P2	ANKRD29_+_21243156.23-P1P2	predicted	predicted	Gagtgtggaaagtatgtgtg	GGGGGCAGACCAGTCTATTT	ANKRD29_+_21243085.23-P1P2|ANKRD29_+_21243156.23-P1P2
ANKRD30A	P1P2	ANKRD30A_-_37414318.23-P1P2	ANKRD30A_+_37414387.23-P1P2	predicted	predicted	GCGTGCCCAGCATCAGGGTC	GCCTCCCTGGAGCGGAAAGT	ANKRD30A_-_37414318.23-P1P2|ANKRD30A_+_37414387.23-P1P2
ANKRD30B	P1P2	ANKRD30B_+_14747872.23-P1P2	ANKRD30B_+_14748017.23-P1P2	predicted	predicted	GGGGACCGACCCCCTCACTT	GTGTGGGGCTCCCTGCAACA	ANKRD30B_+_14747872.23-P1P2|ANKRD30B_+_14748017.23-P1P2
ANKRD31	P1P2	ANKRD31_-_74532849.23-P1P2	ANKRD31_+_74532840.23-P1P2	predicted	predicted	GCGCGCGCGCAGGCCTACTC	GGGCAGGCCACGCCCAGAGT	ANKRD31_-_74532849.23-P1P2|ANKRD31_+_74532840.23-P1P2
ANKRD32	P1P2	ANKRD32_+_93954238.23-P1P2	ANKRD32_+_93954105.23-P1P2	predicted	predicted	GTGAGTCTGGCCAGCGGGTC	GCCGAGAAGTGAGTGGGCGA	ANKRD32_+_93954238.23-P1P2|ANKRD32_+_93954105.23-P1P2
ANKRD33	P1P2	ANKRD33_+_52281730.23-P1P2	ANKRD33_+_52281747.23-P1P2	predicted	predicted	GGGCGGAGATGCTGCCTCGT	GTCAGCCTTGGGGACGCCGG	ANKRD33_+_52281730.23-P1P2|ANKRD33_+_52281747.23-P1P2
ANKRD33B	P1P2	ANKRD33B_-_10564299.23-P1P2	ANKRD33B_+_10564432.23-P1P2	predicted	predicted	GTCTGAACTCTGGCCAGGAA	GCTCGGCGGAAACCGGCACC	ANKRD33B_-_10564299.23-P1P2|ANKRD33B_+_10564432.23-P1P2
ANKRD34A	P1	ANKRD34A_-_145472318.23-P1	ANKRD34A_-_145472274.23-P1	predicted	predicted	GCGGCTGAGAAAAGGAAGTC	GAGTCCCCTAAGGAACACTT	ANKRD34A_-_145472318.23-P1|ANKRD34A_-_145472274.23-P1
ANKRD34A	P2	ANKRD34A_-_145470288.23-P2	ANKRD34A_-_145470390.23-P2	predicted	predicted	GTGGCCGGGGTGAACAAGTT	GGTACTGGGCTTCCTCAAGT	ANKRD34A_-_145470288.23-P2|ANKRD34A_-_145470390.23-P2
ANKRD34B	P1	ANKRD34B_-_79866233.23-P1	ANKRD34B_+_79866320.23-P1	predicted	predicted	GCAGCGAGGCGCTTCCGCTG	GTGGGACTTACGGGGACAGA	ANKRD34B_-_79866233.23-P1|ANKRD34B_+_79866320.23-P1
ANKRD34B	P2	ANKRD34B_+_79865079.23-P2	ANKRD34B_+_79865170.23-P2	predicted	predicted	GCGCAGGGACCGCTCCGCAG	GGGTGCGCCTGCTCCGGGAT	ANKRD34B_+_79865079.23-P2|ANKRD34B_+_79865170.23-P2
ANKRD34C	P1P2	ANKRD34C_-_79574968.23-P1P2	ANKRD34C_+_79574898.23-P1P2	predicted	predicted	GCCCCAAGAGCTAGGGTCGA	GGGGCTCCTAGACTCCCCGA	ANKRD34C_-_79574968.23-P1P2|ANKRD34C_+_79574898.23-P1P2
ANKRD35	P1P2	ANKRD35_-_145562102.23-P1P2	ANKRD35_-_145562131.23-P1P2	predicted	predicted	GGGCTCGAGGAGAGCCTCTA	GGAGGGGAAAAGGCCCTAGG	ANKRD35_-_145562102.23-P1P2|ANKRD35_-_145562131.23-P1P2
ANKRD36	P1P2	ANKRD36_-_97778435.23-P1P2	ANKRD36_+_97778419.23-P1P2	predicted	predicted	GCCTGCCCATCACAGGACTC	GTGTCGCCCGAGTCCTGTGA	ANKRD36_-_97778435.23-P1P2|ANKRD36_+_97778419.23-P1P2
ANKRD36C	P1P2	ANKRD36C_-_96658339.23-P1P2	ANKRD36C_-_96658513.23-P1P2	predicted	predicted	GGCGGCCGGCCAGCGCCCAA	GGTCGCCCAAGTCCTATGAT	ANKRD36C_-_96658339.23-P1P2|ANKRD36C_-_96658513.23-P1P2
ANKRD37	P1P2	ANKRD37_+_186317681.23-P1P2	ANKRD37_-_186317178.23-P1P2	predicted	predicted	GCGTGCGCAGGGTAAGTCAG	GCACCCGCGGGGCCGGACAG	ANKRD37_+_186317681.23-P1P2|ANKRD37_-_186317178.23-P1P2
ANKRD39	P1P2	ANKRD39_+_97524013.23-P1P2	ANKRD39_+_97523806.23-P1P2	predicted	predicted	GCGGCCCGGCGGCCCTCCAG	GACGCCGAGCGGCCAGATCA	ANKRD39_+_97524013.23-P1P2|ANKRD39_+_97523806.23-P1P2
ANKRD40	P1P2	ANKRD40_+_48785303.23-P1P2	ANKRD40_-_48785418.23-P1P2	predicted	predicted	GCCGGAGCCCCGGGTCGGAA	GCCCCACCCCGCAGTTTCAA	ANKRD40_+_48785303.23-P1P2|ANKRD40_-_48785418.23-P1P2
ANKRD42	P1P2	ANKRD42_-_82904726.23-P1P2	ANKRD42_-_82904688.23-P1P2	predicted	predicted	GAGCGTGGGCCGTGAGGAAC	GAAAGCCATGGAATAGCTGA	ANKRD42_-_82904726.23-P1P2|ANKRD42_-_82904688.23-P1P2
ANKRD44	ENST00000328737.2	ANKRD44_-_198062864.23-ENST00000328737.2	ANKRD44_-_198062941.23-ENST00000328737.2	predicted	predicted	Gaggctgtgagcagaagcta	Ggtaagctgagtagtagaca	ANKRD44_-_198062864.23-ENST00000328737.2|ANKRD44_-_198062941.23-ENST00000328737.2
ANKRD44	ENST00000450567.1	ANKRD44_+_198051973.23-ENST00000450567.1	ANKRD44_+_198052043.23-ENST00000450567.1	predicted	predicted	Gcccactggacttcttgtaa	GGTTCAGGTTAGAGACTATC	ANKRD44_+_198051973.23-ENST00000450567.1|ANKRD44_+_198052043.23-ENST00000450567.1
ANKRD45	P1P2	ANKRD45_-_173639060.23-P1P2	ANKRD45_-_173639228.23-P1P2	predicted	predicted	GAGCGCGGGAAGGTTATTCT	GTTGGTTGTTGGCCTGTCTT	ANKRD45_-_173639060.23-P1P2|ANKRD45_-_173639228.23-P1P2
ANKRD46	P1P2	ANKRD46_-_101571995.23-P1P2	ANKRD46_-_101572128.23-P1P2	predicted	predicted	GTCAAGGAGGCGGTGACGGG	GTGCTCTGAGTCAGAGACTC	ANKRD46_-_101571995.23-P1P2|ANKRD46_-_101572128.23-P1P2
ANKRD49	P1P2	ANKRD49_-_94227092.23-P1P2	ANKRD49_-_94226994.23-P1P2	predicted	predicted	GGCTACCGCACGCAGTGAGG	GGCCGTAAACCTGAATTCCG	ANKRD49_-_94227092.23-P1P2|ANKRD49_-_94226994.23-P1P2
ANKRD50	P1P2	ANKRD50_+_125634015.23-P1P2	ANKRD50_-_125634081.23-P1P2	predicted	predicted	GCTGCGGGAGAGCGCGGTGG	GGCCGCCTGGGACCCGCTGC	ANKRD50_+_125634015.23-P1P2|ANKRD50_-_125634081.23-P1P2
ANKRD52	P1P2	ANKRD52_+_56652504.23-P1P2	ANKRD52_+_56652298.23-P1P2	predicted	predicted	GGGGGTGTGGAATCGCTGAC	GCGCGCGAGTTCGGGGGTGC	ANKRD52_+_56652504.23-P1P2|ANKRD52_+_56652298.23-P1P2
ANKRD53	P1P2	ANKRD53_-_71205661.23-P1P2	ANKRD53_-_71205672.23-P1P2	predicted	predicted	GAGAGGCAGCCGAACCCTAG	GAACCCTAGCGGCCTGGAAG	ANKRD53_-_71205661.23-P1P2|ANKRD53_-_71205672.23-P1P2
ANKRD54	P1P2	ANKRD54_-_38240461.23-P1P2	ANKRD54_-_38240465.23-P1P2	predicted	predicted	GTCCCAAAACCAATCGGAAA	GAAAACCAATCGGAAAGGGA	ANKRD54_-_38240461.23-P1P2|ANKRD54_-_38240465.23-P1P2
ANKRD55	ENST00000341048.4	ANKRD55_+_55529373.23-ENST00000341048.4	ANKRD55_-_55529420.23-ENST00000341048.4	predicted	predicted	GCTCCCTGTCAATTGGAGAA	GGGGAAAGGCGTCATTTGAA	ANKRD55_+_55529373.23-ENST00000341048.4|ANKRD55_-_55529420.23-ENST00000341048.4
ANKRD6	P1P2	ANKRD6_+_90142758.23-P1P2	ANKRD6_+_90142739.23-P1P2	predicted	predicted	GGACCCTCGCGAGAGAGAGG	GTGGCACCGCGGAGGCCCTG	ANKRD6_+_90142758.23-P1P2|ANKRD6_+_90142739.23-P1P2
ANKRD60	ENST00000457363.1	ANKRD60_-_56803714.23-ENST00000457363.1	ANKRD60_+_56803865.23-ENST00000457363.1	predicted	predicted	GcgcggccgcgcgTCATCCG	GCGCCCATCGGTCTCCCTGG	ANKRD60_-_56803714.23-ENST00000457363.1|ANKRD60_+_56803865.23-ENST00000457363.1
ANKRD61	P1P2	ANKRD61_-_6070756.23-P1P2	ANKRD61_+_6070801.23-P1P2	predicted	predicted	GGGAGAGAAATCAGAAATAA	GCAAATGTCAGCAGTTTTTA	ANKRD61_-_6070756.23-P1P2|ANKRD61_+_6070801.23-P1P2
ANKRD62	P1P2	ANKRD62_-_12093806.23-P1P2	ANKRD62_-_12093852.23-P1P2	predicted	predicted	GTCTCCGCGGATGGCCTCGT	GGGTGCCTAACGGCTCTGCT	ANKRD62_-_12093806.23-P1P2|ANKRD62_-_12093852.23-P1P2
ANKRD63	P1P2	ANKRD63_-_40575447.23-P1P2	ANKRD63_-_40575499.23-P1P2	predicted	predicted	GGGAGCGGACTGCGCCGTCA	GCTGACCCCCACCCCTTCGT	ANKRD63_-_40575447.23-P1P2|ANKRD63_-_40575499.23-P1P2
ANKRD65	P1	ANKRD65_+_1356741.23-P1	ANKRD65_+_1356925.23-P1	predicted	predicted	GAAGGCAGGGCCTTCCTAAG	GGCACATCGGGGTACATCCA	ANKRD65_+_1356741.23-P1|ANKRD65_+_1356925.23-P1
ANKRD65	P2	ANKRD65_+_1355640.23-P2	ANKRD65_+_1355628.23-P2	predicted	predicted	GGACGCGCGCGGCTGGACGG	GTGGACGGCGGCGCACTggg	ANKRD65_+_1355640.23-P2|ANKRD65_+_1355628.23-P2
ANKRD66	P1P2	ANKRD66_-_46714602.23-P1P2	ANKRD66_-_46714428.23-P1P2	predicted	predicted	GCCACCCCACCAGACACCTA	GCTCCGTCACAGTATTATGT	ANKRD66_-_46714602.23-P1P2|ANKRD66_-_46714428.23-P1P2
ANKRD7	P1	ANKRD7_-_117864619.23-P1	ANKRD7_+_117864537.23-P1	predicted	predicted	GCCAAGGTTCATGATCTAAT	GCCTTCAAAAGCAGATCTAA	ANKRD7_-_117864619.23-P1|ANKRD7_+_117864537.23-P1
ANKRD7	P2	ANKRD7_+_117854518.23-P2	ANKRD7_-_117854549.23-P2	predicted	predicted	GTGACCCAGCGCTAGTGTAA	GAGCGCTGGGTCAAAGAAGC	ANKRD7_+_117854518.23-P2|ANKRD7_-_117854549.23-P2
ANKRD9	P1P2	ANKRD9_-_102976238.23-P1P2	ANKRD9_+_102976168.23-P1P2	predicted	predicted	GGGGCGCACCGCTGGACCCG	GGTGCAGCGCGGCGGCCAAT	ANKRD9_-_102976238.23-P1P2|ANKRD9_+_102976168.23-P1P2
ANKS1A	P1P2	ANKS1A_-_34856986.23-P1P2	ANKS1A_-_34856853.23-P1P2	predicted	predicted	GCGCCCAGCTAGGTGAGCTA	GTCGGGAGGCGCGTACAGGT	ANKS1A_-_34856986.23-P1P2|ANKS1A_-_34856853.23-P1P2
ANKS1B	ENST00000329257.7,ENST00000547776.2	ANKS1B_-_100378444.23-ENST00000329257.7,ENST00000547776.2	ANKS1B_-_100378327.23-ENST00000329257.7,ENST00000547776.2	predicted	predicted	GGGAGCGCAGGGAACACCCG	GCGGGTGCGGCGTGAGGGGG	ANKS1B_-_100378444.23-ENST00000329257.7,ENST00000547776.2|ANKS1B_-_100378327.23-ENST00000329257.7,ENST00000547776.2
ANKS3	P1P2	ANKS3_-_4784284.23-P1P2	ANKS3_+_4784360.23-P1P2	predicted	predicted	GCCCGGAAGTAGTTGCGGGA	GGAAGCTGACCGGAAGGTCC	ANKS3_-_4784284.23-P1P2|ANKS3_+_4784360.23-P1P2
ANKS4B	P1P2	ANKS4B_+_21244961.23-P1P2	ANKS4B_-_21244565.23-P1P2	predicted	predicted	GAGCTGGTTAATTAGTGACA	Gtggcatgagggatctttaa	ANKS4B_+_21244961.23-P1P2|ANKS4B_-_21244565.23-P1P2
ANKS6	P1P2	ANKS6_+_101558973.23-P1P2	ANKS6_+_101558967.23-P1P2	predicted	predicted	GTCCCTGGACTCCCGAATAC	GGACTCCCGAATACGGGCAC	ANKS6_+_101558973.23-P1P2|ANKS6_+_101558967.23-P1P2
ANKUB1	ENST00000446160.1	ANKUB1_-_149510948.23-ENST00000446160.1	ANKUB1_-_149510793.23-ENST00000446160.1	predicted	predicted	GAACCCCCACTTAGTGTTGG	GACCAGGGAGATGAATGTGT	ANKUB1_-_149510948.23-ENST00000446160.1|ANKUB1_-_149510793.23-ENST00000446160.1
ANKZF1	P1P2	ANKZF1_+_220094473.23-P1P2	ANKZF1_-_220094411.23-P1P2	predicted	predicted	GCCCACGTAGAGCACACTAT	GACGGGGGGCGGAGACACAA	ANKZF1_+_220094473.23-P1P2|ANKZF1_-_220094411.23-P1P2
ANLN	P1P2	ANLN_+_36429338.23-P1P2	ANLN_+_36429255.23-P1P2	predicted	predicted	GCGGGCCGGGTGGTTCCCAG	GGGCGCTTCCTGCTCTCCAA	ANLN_+_36429338.23-P1P2|ANLN_+_36429255.23-P1P2
ANO1	P1P2	ANO1_-_69924301.23-P1P2	ANO1_-_69924480.23-P1P2	predicted	predicted	GAAAACTTGGAGGGGCCCGC	GGGGACCAGCAGCCGGGTGG	ANO1_-_69924301.23-P1P2|ANO1_-_69924480.23-P1P2
ANO10	P1P2	ANO10_-_43663557.23-P1P2	ANO10_+_43663715.23-P1P2	predicted	predicted	Gacgcggcggggcctagatg	GCCAGGCGACAGCCCAATGA	ANO10_-_43663557.23-P1P2|ANO10_+_43663715.23-P1P2
ANO2	P1P2	ANO2_-_6054612.23-P1P2	ANO2_-_6054643.23-P1P2	predicted	predicted	GGGGAGCGGGGCGTCGAGAA	GCCGCGGCCGGGTTGAGTCC	ANO2_-_6054612.23-P1P2|ANO2_-_6054643.23-P1P2
ANO3	P1P2	ANO3_-_26353587.23-P1P2	ANO3_+_26353530.23-P1P2	predicted	predicted	GTGGACGCGCGGGGGATGCG	GGGTGGGCGTTGAGCGGGGT	ANO3_-_26353587.23-P1P2|ANO3_+_26353530.23-P1P2
ANO4	P1P2	ANO4_+_101188465.23-P1P2	ANO4_+_101188477.23-P1P2	predicted	predicted	GGCAGGGGAGGCATGGTCGG	GCCCTCCCCAGGTGCAGGGG	ANO4_+_101188465.23-P1P2|ANO4_+_101188477.23-P1P2
ANO5	P1P2	ANO5_-_22214477.23-P1P2	ANO5_-_22214469.23-P1P2	predicted	predicted	GGACGGCTTGAGCGGAGAGG	GGACCTGGGGACGGCTTGAG	ANO5_-_22214477.23-P1P2|ANO5_-_22214469.23-P1P2
ANO6	P1P2	ANO6_+_45609736.23-P1P2	ANO6_+_45609712.23-P1P2	predicted	predicted	GCGCGGGGGAACTAGCTGGA	GAGGCGGGAACACGTGAGTG	ANO6_+_45609736.23-P1P2|ANO6_+_45609712.23-P1P2
ANO7	P1P2	ANO7_+_242157089.23-P1P2	ANO7_-_242157645.23-P1P2	predicted	predicted	GGAACTGCAGCACTGCGGGG	GCGCCTCGCGCTGACCCCTC	ANO7_+_242157089.23-P1P2|ANO7_-_242157645.23-P1P2
ANO8	P1P2	ANO8_+_17445655.23-P1P2	ANO8_-_17445695.23-P1P2	predicted	predicted	GGGGCCGGGAAGGAGAATCG	GCCCGATGCACGTCACTCTA	ANO8_+_17445655.23-P1P2|ANO8_-_17445695.23-P1P2
ANO9	P1P2	ANO9_+_442093.23-P1P2	ANO9_-_442092.23-P1P2	predicted	predicted	GAGGGGCTGGGGTACTCTCC	GCGGGGCGGAGCCAGCATCC	ANO9_+_442093.23-P1P2|ANO9_-_442092.23-P1P2
ANP32A	P1P2	ANP32A_-_69113407.23-P1P2	ANP32A_+_69113380.23-P1P2	predicted	predicted	GAGGCTCGGCCATTTGGTAG	GCCAAATGGCCGAGCCTCCC	ANP32A_-_69113407.23-P1P2|ANP32A_+_69113380.23-P1P2
ANP32B	P1P2	ANP32B_+_100745411.23-P1P2	ANP32B_-_100745290.23-P1P2	predicted	predicted	GAAAGGCGCAGCCCGAATAG	GGCTCCGGGCGCGACGACGT	ANP32B_+_100745411.23-P1P2|ANP32B_-_100745290.23-P1P2
ANP32D	P1P2	ANP32D_-_48866136.23-P1P2	ANP32D_-_48866266.23-P1P2	predicted	predicted	Ggtccgtgagatatatacta	Gctaaggttttggagcaact	ANP32D_-_48866136.23-P1P2|ANP32D_-_48866266.23-P1P2
ANP32E	P1P2	ANP32E_+_150208436.23-P1P2	ANP32E_-_150208617.23-P1P2	predicted	predicted	GTCTCTGAGCAGCCATTGAA	GCCAGAAATTCCGTACCTAT	ANP32E_+_150208436.23-P1P2|ANP32E_-_150208617.23-P1P2
ANPEP	P1	ANPEP_+_90358387.23-P1	ANPEP_+_90358297.23-P1	predicted	predicted	GGCTCCCTGCGGGACACTCA	GGCGACAGGGACCCCGTCGG	ANPEP_+_90358387.23-P1|ANPEP_+_90358297.23-P1
ANPEP	P2	ANPEP_-_90350105.23-P2	ANPEP_-_90350097.23-P2	predicted	predicted	GATCAGGCCCGAGGGCTGAA	GGGCCTGGGATCAGGCCCGA	ANPEP_-_90350105.23-P2|ANPEP_-_90350097.23-P2
ANTXR1	P1P2	ANTXR1_+_69240120.23-P1P2	ANTXR1_+_69240109.23-P1P2	predicted	predicted	GAAAGCACGCGTGGGACCCG	GGGGACCCGCGGGAGTGCGT	ANTXR1_+_69240120.23-P1P2|ANTXR1_+_69240109.23-P1P2
ANTXR2	P1P2	ANTXR2_-_80994407.23-P1P2	ANTXR2_-_80994346.23-P1P2	predicted	predicted	GAGTGTGCGCCTGGGGACGA	GCTGGAGAGAAGCCACGCCG	ANTXR2_-_80994407.23-P1P2|ANTXR2_-_80994346.23-P1P2
ANXA1	P1P2	ANXA1_+_75766703.23-P1P2	ANXA1_-_75766492.23-P1P2	predicted	predicted	GGCAACCAGAAGTTAGTAAT	GTGTGCCAATCACTGGTATT	ANXA1_+_75766703.23-P1P2|ANXA1_-_75766492.23-P1P2
ANXA10	P1P2	ANXA10_-_169013603.23-P1P2	ANXA10_+_169013506.23-P1P2	predicted	predicted	GCAACTGGGGATTAGGTTAA	GTGAAAAAGCTGATGACTTA	ANXA10_-_169013603.23-P1P2|ANXA10_+_169013506.23-P1P2
ANXA11	P1P2	ANXA11_+_81965458.23-P1P2	ANXA11_-_81965372.23-P1P2	predicted	predicted	GGCGCCGCAGGGGTTAGGGG	GCGGCCCCGCCCCCAAGATG	ANXA11_+_81965458.23-P1P2|ANXA11_-_81965372.23-P1P2
ANXA13	P1P2	ANXA13_-_124749725.23-P1P2	ANXA13_+_124750159.23-P1P2	predicted	predicted	GTGAATACATTGTTGGGGAT	GACTCACGGAAAACCTCTGG	ANXA13_-_124749725.23-P1P2|ANXA13_+_124750159.23-P1P2
ANXA2	P1P2	ANXA2_-_60690377.23-P1P2	ANXA2_-_60690325.23-P1P2	predicted	predicted	GGAGCCGCGCCACGCGGGAG	GGTGACTCACCCCGGCCCGC	ANXA2_-_60690377.23-P1P2|ANXA2_-_60690325.23-P1P2
ANXA2R	P1P2	ANXA2R_-_43040523.23-P1P2	ANXA2R_-_43040483.23-P1P2	predicted	predicted	GACCGGAAAACTGTCTGCTA	GGCCAAGAACCACCCGTTTC	ANXA2R_-_43040523.23-P1P2|ANXA2R_-_43040483.23-P1P2
ANXA3	P1P2	ANXA3_-_79472769.23-P1P2	ANXA3_-_79472796.23-P1P2	predicted	predicted	GGAAGCTTAGAGACCGGTGA	GAGCTGGGGCGCCTGTGTAC	ANXA3_-_79472769.23-P1P2|ANXA3_-_79472796.23-P1P2
ANXA4	P1P2	ANXA4_+_69969142.23-P1P2	ANXA4_-_69968989.23-P1P2	predicted	predicted	GACCGGAAAATCCCTCTCTA	GAGCGGGGCTGGCGATACTG	ANXA4_+_69969142.23-P1P2|ANXA4_-_69968989.23-P1P2
ANXA5	P1P2	ANXA5_+_122618286.23-P1P2	ANXA5_-_122618304.23-P1P2	predicted	predicted	GGCGCCGCGGGAGACCAACT	GCGTCCCAGTTGGTCTCCCG	ANXA5_+_122618286.23-P1P2|ANXA5_-_122618304.23-P1P2
ANXA6	P1P2	ANXA6_+_150537379.23-P1P2	ANXA6_+_150537433.23-P1P2	predicted	predicted	GCCTCTGCGCGCCACGTGTC	GaGCTAAGGAGCTAGAGGGG	ANXA6_+_150537379.23-P1P2|ANXA6_+_150537433.23-P1P2
ANXA7	P1P2	ANXA7_-_75173906.23-P1P2	ANXA7_-_75174122.23-P1P2	predicted	predicted	GAACACCCCCGGAGCCGGAG	GAGTGGCGGGCGGTAGAGAA	ANXA7_-_75173906.23-P1P2|ANXA7_-_75174122.23-P1P2
ANXA8	P1P2	ANXA8_+_48255221.23-P1P2	ANXA8_+_48255191.23-P1P2	predicted	predicted	GTGGCTTTGGGCATCTCCTG	GCCCCACCCAGACACTGCCC	ANXA8_+_48255221.23-P1P2|ANXA8_+_48255191.23-P1P2
ANXA8L1	ENST00000359178.4	ANXA8L1_+_47174139.23-ENST00000359178.4	ANXA8L1_-_47174124.23-ENST00000359178.4	predicted	predicted	GAGCAGGCCTGGGCAGTGTC	GTGGCTTTGGGCATCTCCTG	ANXA8L1_+_47174139.23-ENST00000359178.4|ANXA8L1_-_47174124.23-ENST00000359178.4
ANXA9	P1P2	ANXA9_+_150954655.23-P1P2	ANXA9_-_150954642.23-P1P2	predicted	predicted	GCCCAGACGTGGGAGAGGAC	GCAGGAAGGTGTCTGCATGT	ANXA9_+_150954655.23-P1P2|ANXA9_-_150954642.23-P1P2
AOAH	P1P2	AOAH_-_36764160.23-P1P2	AOAH_-_36764156.23-P1P2	predicted	predicted	GCGGAACTGATCTGTTGGGT	GTTGCCGGAACTGATCTGTT	AOAH_-_36764160.23-P1P2|AOAH_-_36764156.23-P1P2
AOC1	P1	AOC1_-_150549400.23-P1	AOC1_+_150549506.23-P1	predicted	predicted	GAAGCCAAGGCAAATTCTTG	GCTGGCCTAGGAGGGGCCTA	AOC1_-_150549400.23-P1|AOC1_+_150549506.23-P1
AOC1	P2	AOC1_-_150553395.23-P2	AOC1_+_150553501.23-P2	predicted	predicted	GGGCGCTGGGGACTATGCAT	GATGAACTTAGTTGTCTTAT	AOC1_-_150553395.23-P2|AOC1_+_150553501.23-P2
AOC2	P1P2	AOC2_+_40996314.23-P1P2	AOC2_-_40996471.23-P1P2	predicted	predicted	GCTAACCTCCAGTTTCCACC	GGTGCCCTGGGCCAAACCAC	AOC2_+_40996314.23-P1P2|AOC2_-_40996471.23-P1P2
AOC3	P1P2	AOC3_+_41003045.23-P1P2	AOC3_-_41002946.23-P1P2	predicted	predicted	GTTGGGGAGAGTTGGGGCTA	GTCTGGCCCTGACTAAGTGG	AOC3_+_41003045.23-P1P2|AOC3_-_41002946.23-P1P2
AOX1	P1	AOX1_+_201450587.23-P1	AOX1_-_201450668.23-P1	predicted	predicted	GTCACTGGCGCCCTCTATGT	GGCAAAGAGCTCAGGAACGT	AOX1_+_201450587.23-P1|AOX1_-_201450668.23-P1
AOX1	P2	AOX1_-_201473855.23-P2	AOX1_-_201473899.23-P2	predicted	predicted	GGGGTCCCAGATCAGGAACA	GAACTCTGGTATGCATCCCT	AOX1_-_201473855.23-P2|AOX1_-_201473899.23-P2
AP1AR	P1P2	AP1AR_-_113152774.23-P1P2	AP1AR_+_113152812.23-P1P2	predicted	predicted	GGCGAGCGGAAGTGACGCAC	GCCTCTCCCGCGCCCCAATT	AP1AR_-_113152774.23-P1P2|AP1AR_+_113152812.23-P1P2
AP1B1	P1P2	AP1B1_-_29784657.23-P1P2	AP1B1_+_29784666.23-P1P2	predicted	predicted	GCGTGGGGCGGGGCAAGAAA	GGCCGAGGGGTTAATACCGT	AP1B1_-_29784657.23-P1P2|AP1B1_+_29784666.23-P1P2
AP1G1	P1P2	AP1G1_-_71843069.23-P1P2	AP1G1_-_71843000.23-P1P2	predicted	predicted	GAGTCTGAGCGAGAAAGATC	GGCAAACGTAGCAAGGATCG	AP1G1_-_71843069.23-P1P2|AP1G1_-_71843000.23-P1P2
AP1G2	P1P2	AP1G2_-_24037142.23-P1P2	AP1G2_+_24037180.23-P1P2	predicted	predicted	GAGCGGAGAGACAGCATGAT	GCAAACTGAGGCTCTCCGGG	AP1G2_-_24037142.23-P1P2|AP1G2_+_24037180.23-P1P2
AP1M1	P1P2	AP1M1_-_16308587.23-P1P2	AP1M1_+_16308545.23-P1P2	predicted	predicted	GCCCACCGGGCCTTACTTCC	GGGCGGGGCCGACCAAATCA	AP1M1_-_16308587.23-P1P2|AP1M1_+_16308545.23-P1P2
AP1M2	P1P2	AP1M2_-_10698158.23-P1P2	AP1M2_+_10698059.23-P1P2	predicted	predicted	GGCCACCCAGGAGTAATGAC	GCCCGCAGCCATCTTCAAGT	AP1M2_-_10698158.23-P1P2|AP1M2_+_10698059.23-P1P2
AP1S1	P1P2	AP1S1_+_100797640.23-P1P2	AP1S1_-_100797712.23-P1P2	predicted	predicted	GGGCGCGCCACGCACTGCGC	GGGGCTTCGGGCGAGAGGGA	AP1S1_+_100797640.23-P1P2|AP1S1_-_100797712.23-P1P2
AP1S2	P1P2	AP1S2_-_15873082.23-P1P2	AP1S2_-_15873055.23-P1P2	predicted	predicted	GCGGTCGCCAGCGGCACCGG	GCTAGGCGACGCGCGGGAAG	AP1S2_-_15873082.23-P1P2|AP1S2_-_15873055.23-P1P2
AP1S3	P1P2	AP1S3_+_224702347.23-P1P2	AP1S3_+_224702511.23-P1P2	predicted	predicted	GCAGCGGGGAGGAGCGTGCA	GACAGCTGCAGCCGAGGCGG	AP1S3_+_224702347.23-P1P2|AP1S3_+_224702511.23-P1P2
AP2A1	P1P2	AP2A1_-_50270181.23-P1P2	AP2A1_+_50269912.23-P1P2	predicted	predicted	GAGGAGCTCAAGCCAGTGGG	GAAGGGAGGGACGTGAAGGA	AP2A1_-_50270181.23-P1P2|AP2A1_+_50269912.23-P1P2
AP2A2	P1P2	AP2A2_-_925738.23-P1P2	AP2A2_-_925877.23-P1P2	predicted	predicted	GCCCCCGCGCCTGCCTCGAC	GcgcgcgGCGGCCCAGAAAG	AP2A2_-_925738.23-P1P2|AP2A2_-_925877.23-P1P2
AP2B1	P1P2	AP2B1_+_33914438.23-P1P2	AP2B1_+_33914295.23-P1P2	predicted	predicted	GGCCCTGAACTCACcggagg	GTGCCAGGGACAAAGATGGT	AP2B1_+_33914438.23-P1P2|AP2B1_+_33914295.23-P1P2
AP2M1	P1	AP2M1_-_183892453.23-P1	AP2M1_-_183892505.23-P1	predicted	predicted	GGGAATGTGTATTTCTGGTA	GGGCGGGGGCGGTTTCTCGA	AP2M1_-_183892453.23-P1|AP2M1_-_183892505.23-P1
AP2M1	P2	AP2M1_-_183894425.23-P2	AP2M1_+_183894379.23-P2	predicted	predicted	GCGAGAGTCTGCACAGGAGG	GTCCCGCCAGTGACTCACTA	AP2M1_-_183894425.23-P2|AP2M1_+_183894379.23-P2
AP2S1	P1P2	AP2S1_-_47354205.23-P1P2	AP2S1_+_47354230.23-P1P2	predicted	predicted	GGGCCAGCCTGGGTGAAGAT	GGGGATCTGACTCGTTTGGT	AP2S1_-_47354205.23-P1P2|AP2S1_+_47354230.23-P1P2
AP3B1	P1P2	AP3B1_-_77590683.23-P1P2	AP3B1_+_77590616.23-P1P2	predicted	predicted	GTGCGAGCCGGACTGCGGAA	GGGAGCAGGAAAGTCCGCGC	AP3B1_-_77590683.23-P1P2|AP3B1_+_77590616.23-P1P2
AP3B2	P1P2	AP3B2_-_83378718.23-P1P2	AP3B2_-_83378704.23-P1P2	predicted	predicted	GCGACAGGGGCGGTGCGTCA	GTGTCCGCGAGGAGGCGACA	AP3B2_-_83378718.23-P1P2|AP3B2_-_83378704.23-P1P2
AP3D1	P1P2	AP3D1_+_2151915.23-P1P2	AP3D1_-_2151697.23-P1P2	predicted	predicted	GGCGGAGCTCCAGTCTTCCT	GACGACGACAGGTAGTCCAA	AP3D1_+_2151915.23-P1P2|AP3D1_-_2151697.23-P1P2
AP3M1	P1P2	AP3M1_-_75910918.23-P1P2	AP3M1_+_75910800.23-P1P2	predicted	predicted	GGATGACAGCGGCACAGAAT	GAGGGACCCCAGACTGCGTT	AP3M1_-_75910918.23-P1P2|AP3M1_+_75910800.23-P1P2
AP3M2	P1P2	AP3M2_-_42010447.23-P1P2	AP3M2_-_42010477.23-P1P2	predicted	predicted	GCAACAGCGATCAATCAGAG	GCTCCCAGATACCCAATCAG	AP3M2_-_42010447.23-P1P2|AP3M2_-_42010477.23-P1P2
AP3S1	P1P2	AP3S1_+_115177511.23-P1P2	AP3S1_+_115177553.23-P1P2	predicted	predicted	GTCCGAGCCAGCGGCCTAAC	GCTGGGCGGGGCAGGCACTA	AP3S1_+_115177511.23-P1P2|AP3S1_+_115177553.23-P1P2
AP3S2	P1P2	AP3S2_+_90437417.23-P1P2	AP3S2_-_90437369.23-P1P2	predicted	predicted	GTGGGCGAGGGACATAGATC	GAGGGCAGGTGCGGATGCCG	AP3S2_+_90437417.23-P1P2|AP3S2_-_90437369.23-P1P2
AP4B1	P1P2	AP4B1_+_114447624.23-P1P2	AP4B1_+_114447590.23-P1P2	predicted	predicted	GGGACGCGGCGCTGGAAATC	GAAGTAGCGGGAGCGATCTG	AP4B1_+_114447624.23-P1P2|AP4B1_+_114447590.23-P1P2
AP4E1	P1P2	AP4E1_+_51200779.23-P1P2	AP4E1_-_51200738.23-P1P2	predicted	predicted	GAGGGCGCAAGAGACCGCGG	GTACCCCGTCGCGAGAAAGG	AP4E1_+_51200779.23-P1P2|AP4E1_-_51200738.23-P1P2
AP4M1	P1P2	AP4M1_-_99699143.23-P1P2	AP4M1_-_99699176.23-P1P2	predicted	predicted	GCGGGCCTAGAATGAGTGAC	GGGCGTCGGAAGGGAATCTC	AP4M1_-_99699143.23-P1P2|AP4M1_-_99699176.23-P1P2
AP4S1	P1P2	AP4S1_-_31494681.23-P1P2	AP4S1_+_31494555.23-P1P2	predicted	predicted	GGGGGGTGGTCCGGAAAAGG	GCTAGGGTGCACAGTGACTT	AP4S1_-_31494681.23-P1P2|AP4S1_+_31494555.23-P1P2
AP5B1	P1P2	AP5B1_-_65548429.23-P1P2	AP5B1_+_65548398.23-P1P2	predicted	predicted	GCCGCCGCGGGCACTCAGGC	GTGCCCGCGGCGGCTGAGTC	AP5B1_-_65548429.23-P1P2|AP5B1_+_65548398.23-P1P2
AP5M1	P1P2	AP5M1_-_57735649.23-P1P2	AP5M1_-_57735645.23-P1P2	predicted	predicted	GCGCCAGGGAGGTTGTCGGG	GCGCGCGCCAGGGAGGTTGT	AP5M1_-_57735649.23-P1P2|AP5M1_-_57735645.23-P1P2
AP5S1	P1P2	AP5S1_-_3800953.23-P1P2	AP5S1_-_3800966.23-P1P2	predicted	predicted	GCTGGGGCTCCGCTGATCTA	GGATCTAGGGCAACGAGCGG	AP5S1_-_3800953.23-P1P2|AP5S1_-_3800966.23-P1P2
AP5Z1	P1P2	AP5Z1_+_4815133.23-P1P2	AP5Z1_-_4815181.23-P1P2	predicted	predicted	GGGGCGGGGCGTAGGTGCCG	GGCTCCACGCCAAAGCCCAT	AP5Z1_+_4815133.23-P1P2|AP5Z1_-_4815181.23-P1P2
APAF1	P1P2	APAF1_+_99038941.23-P1P2	APAF1_-_99038830.23-P1P2	predicted	predicted	GCCGCCGCGCACTCCTGCCA	GGGGTCGCGCGCGCCACGTC	APAF1_+_99038941.23-P1P2|APAF1_-_99038830.23-P1P2
APBA1	P1P2	APBA1_+_72287411.23-P1P2	APBA1_+_72287439.23-P1P2	predicted	predicted	GAGGCAGGGGCGCTACTAGC	GgccgcgcgcgcACGCGAGT	APBA1_+_72287411.23-P1P2|APBA1_+_72287439.23-P1P2
APBA2	P1P2	APBA2_+_29131071.23-P1P2	APBA2_+_29131234.23-P1P2	predicted	predicted	GATCGCGCGCCGTGAAGAGA	GACGCAGCGTACGGCACGCA	APBA2_+_29131071.23-P1P2|APBA2_+_29131234.23-P1P2
APBA3	P1P2	APBA3_+_3761811.23-P1P2	APBA3_+_3761796.23-P1P2	predicted	predicted	GGGCCAGCCGGGGCAGTCTG	GTCTGCGGGCCGGGAAGCCT	APBA3_+_3761811.23-P1P2|APBA3_+_3761796.23-P1P2
APBB1	P1P2	APBB1_+_6440490.23-P1P2	APBB1_+_6440552.23-P1P2	predicted	predicted	GTGCAGGGGTGTCTGCTGGG	GTGAGTCTGTGGAATAGTAG	APBB1_+_6440490.23-P1P2|APBB1_+_6440552.23-P1P2
APBB1IP	P1P2	APBB1IP_-_26727160.23-P1P2	APBB1IP_-_26727111.23-P1P2	predicted	predicted	GCCTGCACCGCGTCCCCTGA	GCCGAGAGACAGCTGAACTC	APBB1IP_-_26727160.23-P1P2|APBB1IP_-_26727111.23-P1P2
APBB2	P1P2	APBB2_-_41216654.23-P1P2	APBB2_-_41216760.23-P1P2	predicted	predicted	GGCAGCGGCTGCGCGAGGGA	GCTCCCAGGGCGACCCCTGC	APBB2_-_41216654.23-P1P2|APBB2_-_41216760.23-P1P2
APBB3	P1P2	APBB3_-_139944047.23-P1P2	APBB3_-_139944067.23-P1P2	predicted	predicted	GCAGGGGTGGTGCGTGTAAA	GGGGCGTCTGGATCCCCGAA	APBB3_-_139944047.23-P1P2|APBB3_-_139944067.23-P1P2
APC	P1	APC_-_112073440.23-P1	APC_-_112073368.23-P1	predicted	predicted	GCCACTGCGGAGTGCGGGTC	GCGCGAGGGCATACCCCCGA	APC_-_112073440.23-P1|APC_-_112073368.23-P1
APC	P2	APC_-_112043056.23-P2	APC_-_112043159.23-P2	predicted	predicted	GAAGTGCTGCAACTGAGACT	GCATAACAGGCTCTAGTCTC	APC_-_112043056.23-P2|APC_-_112043159.23-P2
APC2	P1	APC2_+_1450054.23-P1	APC2_+_1450062.23-P1	predicted	predicted	GAATGAGGGCGCGGGAAGAC	GAGACAGCCAATGAGGGCGC	APC2_+_1450054.23-P1|APC2_+_1450062.23-P1
APC2	P2	APC2_+_1446137.23-P2	APC2_+_1446112.23-P2	predicted	predicted	GGGCGGGGCTCCTCCCGAAA	GAGGGCGTACCGTGGGGTCT	APC2_+_1446137.23-P2|APC2_+_1446112.23-P2
APCDD1	P1P2	APCDD1_+_10454491.23-P1P2	APCDD1_+_10454483.23-P1P2	predicted	predicted	GggAGCGCGGAGACTTGAAA	GGAGACTTGAAAGGGCGCGT	APCDD1_+_10454491.23-P1P2|APCDD1_+_10454483.23-P1P2
APCDD1L	P1P2	APCDD1L_-_57090585.23-P1P2	APCDD1L_-_57090577.23-P1P2	predicted	predicted	GCAGCCGTGAGGCGGAGGAC	GAAGCGAGGCAGCCGTGAGG	APCDD1L_-_57090585.23-P1P2|APCDD1L_-_57090577.23-P1P2
APCS	P1P2	APCS_+_159557365.23-P1P2	APCS_+_159557495.23-P1P2	predicted	predicted	GGGGCAGCAGGGTTATGGAT	GGGCGCTTACGGTGAAGGAG	APCS_+_159557365.23-P1P2|APCS_+_159557495.23-P1P2
APEH	P1P2	APEH_+_49711595.23-P1P2	APEH_+_49711623.23-P1P2	predicted	predicted	GAGAGCAGGGGTCTCGCCAG	GCCTGGGAGCGAGAAGTCCT	APEH_+_49711595.23-P1P2|APEH_+_49711623.23-P1P2
APEX1	P1P2	APEX1_-_20923224.23-P1P2	APEX1_-_20923216.23-P1P2	predicted	predicted	GAAACAGCCCGAGGGAGGGT	GACAACGATAAACAGCCCGA	APEX1_-_20923224.23-P1P2|APEX1_-_20923216.23-P1P2
APEX2	P1P2	APEX2_+_55026637.23-P1P2	APEX2_+_55026648.23-P1P2	predicted	predicted	GGACGCTGAAGGAAGCAAAG	GGGAACTGGGTGGACGCTGA	APEX2_+_55026637.23-P1P2|APEX2_+_55026648.23-P1P2
APH1A	P1P2	APH1A_-_150241557.23-P1P2	APH1A_-_150241499.23-P1P2	predicted	predicted	GGAGGCCTTGACTTCGTCCT	GAATGGAGAATCAGCGCGGG	APH1A_-_150241557.23-P1P2|APH1A_-_150241499.23-P1P2
APH1B	P1P2	APH1B_+_63569577.23-P1P2	APH1B_+_63569516.23-P1P2	predicted	predicted	GGGCGTGGGGGTAAACGCTA	GCGCAGGGGCGGGCTCAAGG	APH1B_+_63569577.23-P1P2|APH1B_+_63569516.23-P1P2
API5	P1P2	API5_-_43333456.23-P1P2	API5_-_43333470.23-P1P2	predicted	predicted	GAGGGCGACAAAAACCGCGG	GCGCGGAGGCGCATTGGGGT	API5_-_43333456.23-P1P2|API5_-_43333470.23-P1P2
APIP	P1P2	APIP_-_34937996.23-P1P2	APIP_-_34938208.23-P1P2	predicted	predicted	GgggTCTGGTAAGGCCCCGC	GGAGAAGGCCGTCAAGATGG	APIP_-_34937996.23-P1P2|APIP_-_34938208.23-P1P2
APITD1	P1P2	APITD1_-_10490580.23-P1P2	APITD1_+_10490540.23-P1P2	predicted	predicted	GGGTCGGCCCGCAGTGATGG	GACCCTGGGCAAACGCAGGA	APITD1_-_10490580.23-P1P2|APITD1_+_10490540.23-P1P2
APITD1-CORT	P1P2	APITD1-CORT_-_10490580.23-P1P2	APITD1-CORT_+_10490540.23-P1P2	predicted	predicted	GGGTCGGCCCGCAGTGATGG	GACCCTGGGCAAACGCAGGA	APITD1-CORT_-_10490580.23-P1P2|APITD1-CORT_+_10490540.23-P1P2
APLF	P1P2	APLF_-_68694574.23-P1P2	APLF_-_68694578.23-P1P2	predicted	predicted	GGCCCGGCGTCCTCCAAGAT	GGGCGTCCTCCAAGATGGGA	APLF_-_68694574.23-P1P2|APLF_-_68694578.23-P1P2
APLN	P1P2	APLN_-_128789111.23-P1P2	APLN_+_128789084.23-P1P2	predicted	predicted	GCCCGAGCGTGAGCGCGAGA	GCGCGCTCACGCTCGGGCTG	APLN_-_128789111.23-P1P2|APLN_+_128789084.23-P1P2
APLNR	P1P2	APLNR_-_57004948.23-P1P2	APLNR_+_57005013.23-P1P2	predicted	predicted	GTGGCCCCGCCTCTCCTTTC	GGAGGAGGGAGTGCCCTAAA	APLNR_-_57004948.23-P1P2|APLNR_+_57005013.23-P1P2
APLP1	P1P2	APLP1_-_36359299.23-P1P2	APLP1_-_36359275.23-P1P2	predicted	predicted	GGGGACGCCTGGAATCTCGA	GTCCTGGCTGGGCCCTTCAT	APLP1_-_36359299.23-P1P2|APLP1_-_36359275.23-P1P2
APLP2	P1P2	APLP2_-_129939621.23-P1P2	APLP2_+_129939711.23-P1P2	predicted	predicted	Gggggggcgcgcggttggac	GTTACCACGCCCTCCTTCTG	APLP2_-_129939621.23-P1P2|APLP2_+_129939711.23-P1P2
APMAP	P1P2	APMAP_+_24973437.23-P1P2	APMAP_+_24973454.23-P1P2	predicted	predicted	GAGGGGCGGGGAGAACGCTG	GCCGCCCATGAGGCCGGAAG	APMAP_+_24973437.23-P1P2|APMAP_+_24973454.23-P1P2
APOA1	P1P2	APOA1_-_116708521.23-P1P2	APOA1_-_116708501.23-P1P2	predicted	predicted	GGGCAAACAGCAAGCTGCGG	GGGGGCTGGGCAAATAGAGT	APOA1_-_116708521.23-P1P2|APOA1_-_116708501.23-P1P2
APOA1BP	P1P2	APOA1BP_+_156561469.23-P1P2	APOA1BP_-_156561437.23-P1P2	predicted	predicted	GCGCTCGGGGCTGGAGTCTT	GAAGGGAAGCTGGACCGGGT	APOA1BP_+_156561469.23-P1P2|APOA1BP_-_156561437.23-P1P2
APOA2	P1P2	APOA2_-_161193582.23-P1P2	APOA2_-_161193615.23-P1P2	predicted	predicted	GATGGAAGACTCATGGTGAT	GGGGGTACAGCTCTTAGTGG	APOA2_-_161193582.23-P1P2|APOA2_-_161193615.23-P1P2
APOA4	P1P2	APOA4_+_116694324.23-P1P2	APOA4_+_116694132.23-P1P2	predicted	predicted	GGCCTCGAGGCATCAGTCCC	GAAAGTCCAAGAGGCCTCTT	APOA4_+_116694324.23-P1P2|APOA4_+_116694132.23-P1P2
APOA5	P1P2	APOA5_-_116662887.23-P1P2	APOA5_+_116662779.23-P1P2	predicted	predicted	GACCCCAGGAACAGTTCTCT	GCGCCCTCTTCCCATGTCTG	APOA5_-_116662887.23-P1P2|APOA5_+_116662779.23-P1P2
APOB	P1P2	APOB_-_21267219.23-P1P2	APOB_-_21267126.23-P1P2	predicted	predicted	GGGGCCATGGCCAGCGCCTC	GATGCAGCCGCAGCCACCAG	APOB_-_21267219.23-P1P2|APOB_-_21267126.23-P1P2
APOBEC1	P1P2	APOBEC1_-_7818630.23-P1P2	APOBEC1_-_7818659.23-P1P2	predicted	predicted	GTGAGCTGTCTGTACAAACA	GTGAGAGGGACATTATCGTG	APOBEC1_-_7818630.23-P1P2|APOBEC1_-_7818659.23-P1P2
APOBEC2	P1P2	APOBEC2_+_41020758.23-P1P2	APOBEC2_-_41020638.23-P1P2	predicted	predicted	GGGAACCTGGCAGGTGGGTA	GGGCCACCCTCCTAAATCTC	APOBEC2_+_41020758.23-P1P2|APOBEC2_-_41020638.23-P1P2
APOBEC3A	P1P2	APOBEC3A_+_39353394.23-P1P2	APOBEC3A_-_39353429.23-P1P2	predicted	predicted	GGACACTGTGGAGTGACAAT	GACAGTGTCTGGTGGTTCAG	APOBEC3A_+_39353394.23-P1P2|APOBEC3A_-_39353429.23-P1P2
APOBEC3A_B	P1P2	APOBEC3A_B_+_39353394.23-P1P2	APOBEC3A_B_-_39353429.23-P1P2	predicted	predicted	GGACACTGTGGAGTGACAAT	GACAGTGTCTGGTGGTTCAG	APOBEC3A_B_+_39353394.23-P1P2|APOBEC3A_B_-_39353429.23-P1P2
APOBEC3B	P1P2	APOBEC3B_-_39378238.23-P1P2	APOBEC3B_-_39378338.23-P1P2	predicted	predicted	GTGCCAGCGGGAAGGGTCCG	GGGAGGGGCCATGACTCATA	APOBEC3B_-_39378238.23-P1P2|APOBEC3B_-_39378338.23-P1P2
APOBEC3C	P1P2	APOBEC3C_+_39410123.23-P1P2	APOBEC3C_+_39410129.23-P1P2	predicted	predicted	GGGGCCCCTCCTACTGGCAG	GTTCTCCGGGCCCCTCCTAC	APOBEC3C_+_39410123.23-P1P2|APOBEC3C_+_39410129.23-P1P2
APOBEC3D	P1P2	APOBEC3D_+_39410123.23-P1P2	APOBEC3D_+_39410129.23-P1P2	predicted	predicted	GGGGCCCCTCCTACTGGCAG	GTTCTCCGGGCCCCTCCTAC	APOBEC3D_+_39410123.23-P1P2|APOBEC3D_+_39410129.23-P1P2
APOBEC3F	P1P2	APOBEC3F_+_39436424.23-P1P2	APOBEC3F_+_39436636.23-P1P2	predicted	predicted	GCAGGTGTCTGCCTCTCCCC	GCAGCCAGCGCCCGCGAGGT	APOBEC3F_+_39436424.23-P1P2|APOBEC3F_+_39436636.23-P1P2
APOBEC3G	P1P2	APOBEC3G_-_39472830.23-P1P2	APOBEC3G_+_39472843.23-P1P2	predicted	predicted	GCCTCCGAGGGTGACGGCCT	GGGAGGGAGAGTAAATGGCC	APOBEC3G_-_39472830.23-P1P2|APOBEC3G_+_39472843.23-P1P2
APOBEC3H	P1P2	APOBEC3H_+_39493178.23-P1P2	APOBEC3H_-_39493061.23-P1P2	predicted	predicted	GTCCACCCTCTTCCTTTTGT	GTGTACCTGGAGAGGGAATT	APOBEC3H_+_39493178.23-P1P2|APOBEC3H_-_39493061.23-P1P2
APOBEC4	P1P2	APOBEC4_-_183622582.23-P1P2	APOBEC4_+_183622675.23-P1P2	predicted	predicted	GGGACTGCATATCCCAGTCT	GCTACTCTAGACCAGGAGAA	APOBEC4_-_183622582.23-P1P2|APOBEC4_+_183622675.23-P1P2
APOBR	P1	APOBR_+_28505715.23-P1	APOBR_-_28505894.23-P1	predicted	predicted	GGGAGACCTTAGAACTGGGG	GCTGGGGTGGGGACGCATCA	APOBR_+_28505715.23-P1|APOBR_-_28505894.23-P1
APOBR	P2	APOBR_-_28508191.23-P2	APOBR_-_28508252.23-P2	predicted	predicted	GGGCAGGTCCCAGGCACGCG	GTGGGAAAACCGCACGAGAA	APOBR_-_28508191.23-P2|APOBR_-_28508252.23-P2
APOC1	P1P2	APOC1_-_45417827.23-P1P2	APOC1_-_45417711.23-P1P2	predicted	predicted	GACCCCAACGCTCACGGGAC	GGTGGGGAAAGGGACTAAGG	APOC1_-_45417827.23-P1P2|APOC1_-_45417711.23-P1P2
APOC2	P1P2	APOC2_+_45449142.23-P1P2	APOC2_-_45449162.23-P1P2	predicted	predicted	GTCCCCCAAGGTCACGTCAC	GCCCTGTGACGTGACCTTGG	APOC2_+_45449142.23-P1P2|APOC2_-_45449162.23-P1P2
APOC3	P1P2	APOC3_-_116700376.23-P1P2	APOC3_+_116700481.23-P1P2	predicted	predicted	GGGGAGCCAGTCAGCTAGGA	GTCCAGATGCAGCAAGCGGG	APOC3_-_116700376.23-P1P2|APOC3_+_116700481.23-P1P2
APOC4	P1P2	APOC4_-_45445263.23-P1P2	APOC4_-_45445350.23-P1P2	predicted	predicted	Gaaactgaggccagcaaatg	GttctctcagggcacTGTGT	APOC4_-_45445263.23-P1P2|APOC4_-_45445350.23-P1P2
APOD	P1P2	APOD_+_195310971.23-P1P2	APOD_-_195310910.23-P1P2	predicted	predicted	GCAGCTGTGAAGGAAATCGG	GCGCCCCCATCCAGTCAGGA	APOD_+_195310971.23-P1P2|APOD_-_195310910.23-P1P2
APOE	P1P2	APOE_+_45408951.23-P1P2	APOE_-_45408866.23-P1P2	predicted	predicted	GCAGCCCCCAGTCACGAGGT	GCGAGGTGTCCTCCCTTCCT	APOE_+_45408951.23-P1P2|APOE_-_45408866.23-P1P2
APOF	P1P2	APOF_+_56756710.23-P1P2	APOF_+_56756691.23-P1P2	predicted	predicted	GAACAGGACTGTAGGCATAG	GAGGTTGAGTGTGTGACAAG	APOF_+_56756710.23-P1P2|APOF_+_56756691.23-P1P2
APOH	P1	APOH_+_64225676.23-P1	APOH_+_64225865.23-P1	predicted	predicted	GCATAACAGAGCCACATAAG	GCCAAGGCTGTGAGTGAAAC	APOH_+_64225676.23-P1|APOH_+_64225865.23-P1
APOH	P2	APOH_+_64224465.23-P2	APOH_-_64224313.23-P2	predicted	predicted	Gccttcaaatggttgttgag	GAAATCATCTGGCTTGGGAC	APOH_+_64224465.23-P2|APOH_-_64224313.23-P2
APOL1	P1P2	APOL1_-_36649032.23-P1P2	APOL1_-_36649011.23-P1P2	predicted	predicted	GGTCTCAGGCTGCTCCTCTA	GTGAGAGGGATCTGGATGTC	APOL1_-_36649032.23-P1P2|APOL1_-_36649011.23-P1P2
APOL2	P1P2	APOL2_+_36635738.23-P1P2	APOL2_-_36635756.23-P1P2	predicted	predicted	GGACCCGGATGTCTGGTCTG	GCAGCCGCAGACCAGACATC	APOL2_+_36635738.23-P1P2|APOL2_-_36635756.23-P1P2
APOL3	P1P2	APOL3_+_36556990.23-P1P2	APOL3_+_36556939.23-P1P2	predicted	predicted	GTGGCCAAGAAGGACGTCTG	GCAAGGGTGCTGCTGGACCA	APOL3_+_36556990.23-P1P2|APOL3_+_36556939.23-P1P2
APOL4	P1P2	APOL4_+_36597970.23-P1P2	APOL4_+_36597964.23-P1P2	predicted	predicted	GTGGGCTGCACAATTGGGCA	GGCACAATTGGGCAGGGCTT	APOL4_+_36597970.23-P1P2|APOL4_+_36597964.23-P1P2
APOL5	ENST00000249044.2	APOL5_-_36113859.23-ENST00000249044.2	APOL5_+_36113419.23-ENST00000249044.2	predicted	predicted	GGAGAGACAGGTTTCAGGCA	Gtggtctcattttggcacct	APOL5_-_36113859.23-ENST00000249044.2|APOL5_+_36113419.23-ENST00000249044.2
APOL6	P1P2	APOL6_+_36044427.23-P1P2	APOL6_+_36044343.23-P1P2	predicted	predicted	GGGCTCTTCCAGGAAATCAT	GAAAGAGCAGAATCCAAGTC	APOL6_+_36044427.23-P1P2|APOL6_+_36044343.23-P1P2
APOLD1	P1P2	APOLD1_-_12938326.23-P1P2	APOLD1_+_12938453.23-P1P2	predicted	predicted	GGAAAGGCAGGGTATCCCAC	GCTAGAAGGACGTGACATGG	APOLD1_-_12938326.23-P1P2|APOLD1_+_12938453.23-P1P2
APOM	P1P2	APOM_-_31620013.23-P1P2	APOM_-_31619743.23-P1P2	predicted	predicted	GGACCCGAAACGGCACTCAC	GACAAAGGGCAGGAGATCGA	APOM_-_31620013.23-P1P2|APOM_-_31619743.23-P1P2
APOO	P1P2	APOO_-_23926150.23-P1P2	APOO_-_23926115.23-P1P2	predicted	predicted	GGTACGCGGAGGCGCGAGGA	GCTAGGCGGCAAGAAAGCGC	APOO_-_23926150.23-P1P2|APOO_-_23926115.23-P1P2
APOOL	P1P2	APOOL_-_84258835.23-P1P2	APOOL_-_84258830.23-P1P2	predicted	predicted	GGCAAGGGGCGTAACGGGGT	GGGCAGGCAAGGGGCGTAAC	APOOL_-_84258835.23-P1P2|APOOL_-_84258830.23-P1P2
APOPT1	P1P2	APOPT1_-_104029080.23-P1P2	APOPT1_-_104029164.23-P1P2	predicted	predicted	GAACCCGGGGACACCTCCTC	GAGTGACCGCGACCAAGGAg	APOPT1_-_104029080.23-P1P2|APOPT1_-_104029164.23-P1P2
APP	P1P2	APP_+_27543156.23-P1P2	APP_+_27543279.23-P1P2	predicted	predicted	GGCCGCTAGGGGTCTCTCTC	GTGGGCCGTCGGCCGGGGAG	APP_+_27543156.23-P1P2|APP_+_27543279.23-P1P2
APPBP2	P1P2	APPBP2_-_58603726.23-P1P2	APPBP2_+_58603684.23-P1P2	predicted	predicted	GAAGCGGCCCCggagtggag	GTGGAAGGGACGCTCTCCGT	APPBP2_-_58603726.23-P1P2|APPBP2_+_58603684.23-P1P2
APPL1	P1P2	APPL1_+_57261650.23-P1P2	APPL1_-_57261658.23-P1P2	predicted	predicted	GTGGTCGGGAGGTTCCCGTG	GGGAGAGCCTAGCGCCGCAC	APPL1_+_57261650.23-P1P2|APPL1_-_57261658.23-P1P2
APPL2	P1P2	APPL2_-_105630130.23-P1P2	APPL2_+_105630016.23-P1P2	predicted	predicted	GGGTGCCAGTCCCGTTGCTG	GCCGGAGCTCACCACACTTC	APPL2_-_105630130.23-P1P2|APPL2_+_105630016.23-P1P2
APRT	P1P2	APRT_-_88878939.23-P1P2	APRT_+_88878857.23-P1P2	predicted	predicted	GCCAGGGCGCGCATCCGCGA	GCGGGGAAGAGCCGCCTCAA	APRT_-_88878939.23-P1P2|APRT_+_88878857.23-P1P2
APTX	P1	APTX_+_33001732.23-P1	APTX_-_33001643.23-P1	predicted	predicted	GAGAGAGAACCCAATTGGGG	GCGCTGCGGGATGACGTCAG	APTX_+_33001732.23-P1|APTX_-_33001643.23-P1
APTX	P2	APTX_+_33025403.23-P2	APTX_-_33025208.23-P2	predicted	predicted	GGCGCCAGCCAGGGGACTAG	GTGGCAGCGGCCGAGAAGGG	APTX_+_33025403.23-P2|APTX_-_33025208.23-P2
AQP1	ENST00000509504.1	AQP1_+_30892798.23-ENST00000509504.1	AQP1_-_30892815.23-ENST00000509504.1	predicted	predicted	GGGTACCGCTGGAGTCGTCA	GTGAACCCTGACGACTCCAG	AQP1_+_30892798.23-ENST00000509504.1|AQP1_-_30892815.23-ENST00000509504.1
AQP10	P1P2	AQP10_-_154293405.23-P1P2	AQP10_-_154293417.23-P1P2	predicted	predicted	GGGGTAAAAGAGACAGAGGT	GCAGAGGTTGGGTAAACTCC	AQP10_-_154293405.23-P1P2|AQP10_-_154293417.23-P1P2
AQP11	P1P2	AQP11_-_77300712.23-P1P2	AQP11_-_77300740.23-P1P2	predicted	predicted	GcccgccTACAAGGCCCTGA	GCGGAGGGTGAGTGCGCGGT	AQP11_-_77300712.23-P1P2|AQP11_-_77300740.23-P1P2
AQP12A	P1P2	AQP12A_-_241630755.23-P1P2	AQP12A_-_241630764.23-P1P2	predicted	predicted	GGGTCAAAGAACAGGTGCAG	GACAGGTGCAGGGGCCATGA	AQP12A_-_241630755.23-P1P2|AQP12A_-_241630764.23-P1P2
AQP12B	P1P2	AQP12B_+_241622264.23-P1P2	AQP12B_+_241622853.23-P1P2	predicted	predicted	GTGCAGGCACAGCATCTCGG	GGCAGGAGGGAGCTTCACCT	AQP12B_+_241622264.23-P1P2|AQP12B_+_241622853.23-P1P2
AQP2	P1P2	AQP2_-_50344279.23-P1P2	AQP2_-_50344269.23-P1P2	predicted	predicted	GGCAGCCCTGGGGTAACCAA	GCCCTGGGGCAGCAGCCCTG	AQP2_-_50344279.23-P1P2|AQP2_-_50344269.23-P1P2
AQP3	P1	AQP3_-_33447832.23-P1	AQP3_+_33447707.23-P1	predicted	predicted	GAAGGGAGGGGACGTCAAGG	GCCTCCCAGCCGAGGTGGGG	AQP3_-_33447832.23-P1|AQP3_+_33447707.23-P1
AQP3	P2	AQP3_+_33443372.23-P2	AQP3_-_33443213.23-P2	predicted	predicted	GAAGCTGCCCATCTACACCC	GAATGAGTGAGTCATGAGCC	AQP3_+_33443372.23-P2|AQP3_-_33443213.23-P2
AQP4	P1P2	AQP4_-_24445724.23-P1P2	AQP4_-_24445855.23-P1P2	predicted	predicted	GTGTGCTGGGAGTCAGATTA	GTGTAGACACAGGGCATTTC	AQP4_-_24445724.23-P1P2|AQP4_-_24445855.23-P1P2
AQP5	P1P2	AQP5_+_50355619.23-P1P2	AQP5_-_50355506.23-P1P2	predicted	predicted	GCTGGGGCGCGCTATATAgg	GccggggTTGCGCTGGACGA	AQP5_+_50355619.23-P1P2|AQP5_-_50355506.23-P1P2
AQP6	P1P2	AQP6_-_50366628.23-P1P2	AQP6_+_50366530.23-P1P2	predicted	predicted	GCCGCCCTGGAAATCATCGT	GGCAGGGCAGCGGGGCTCAT	AQP6_-_50366628.23-P1P2|AQP6_+_50366530.23-P1P2
AQP7	P1P2	AQP7_+_33402642.23-P1P2	AQP7_+_33402649.23-P1P2	predicted	predicted	GGGCACTGCTGGCCGGACGA	GTCTCCACGGCACTGCTGGC	AQP7_+_33402642.23-P1P2|AQP7_+_33402649.23-P1P2
AQP8	P1P2	AQP8_+_25228253.23-P1P2	AQP8_+_25228185.23-P1P2	predicted	predicted	GGACCTGCTGATCACACTAT	GAAAGCAATAAACCTCAGGT	AQP8_+_25228253.23-P1P2|AQP8_+_25228185.23-P1P2
AQP9	P1P2	AQP9_-_58430405.23-P1P2	AQP9_-_58430417.23-P1P2	predicted	predicted	GAGGGCCCGTCACTGTGATT	GTGTGATTTGGCAACACAAC	AQP9_-_58430405.23-P1P2|AQP9_-_58430417.23-P1P2
AQPEP	P1P2	AQPEP_-_115298016.23-P1P2	AQPEP_+_115297955.23-P1P2	predicted	predicted	GCCTGGAGGCATCTTCCGTG	GTGGTCAAGCCAAACGAATC	AQPEP_-_115298016.23-P1P2|AQPEP_+_115297955.23-P1P2
AQR	P1P2	AQR_+_35262073.23-P1P2	AQR_+_35262070.23-P1P2	predicted	predicted	GCGCTAGAGGGCGTGTACAG	GTAGAGGGCGTGTACAGAGG	AQR_+_35262073.23-P1P2|AQR_+_35262070.23-P1P2
AR	P1P2	AR_-_66763753.23-P1P2	AR_+_66763712.23-P1P2	predicted	predicted	GTTAGCGCGCGGTgagggga	GAACGCCTGCCTAGTGGCTT	AR_-_66763753.23-P1P2|AR_+_66763712.23-P1P2
ARAF	P1P2	ARAF_-_47420531.23-P1P2	ARAF_+_47420430.23-P1P2	predicted	predicted	GGACCCTGACCCAATAAGGG	GCCTGAAACGTCAAGATCTG	ARAF_-_47420531.23-P1P2|ARAF_+_47420430.23-P1P2
ARAP1	P1	ARAP1_-_72433514.23-P1	ARAP1_+_72433544.23-P1	predicted	predicted	GGATCTTGCAGGCCCTCACA	GGGTGGAGAGGCCACCGCCA	ARAP1_-_72433514.23-P1|ARAP1_+_72433544.23-P1
ARAP1	P2	ARAP1_-_72463587.23-P2	ARAP1_-_72463629.23-P2	predicted	predicted	GCCCTCCCCCCGCCTAGTCA	GGCCCGCCCGCCGGACCCGT	ARAP1_-_72463587.23-P2|ARAP1_-_72463629.23-P2
ARAP2	P1P2	ARAP2_-_36246195.23-P1P2	ARAP2_+_36246254.23-P1P2	predicted	predicted	GggAAGCCGGAGCTCAACGG	GGCCAGGCGCGGCCAAGTCG	ARAP2_-_36246195.23-P1P2|ARAP2_+_36246254.23-P1P2
ARAP3	P1P2	ARAP3_-_141061992.23-P1P2	ARAP3_+_141061961.23-P1P2	predicted	predicted	GCCCTCTCGCAGGCCGAGAA	GCCTGCGAGAGGGCAGACTG	ARAP3_-_141061992.23-P1P2|ARAP3_+_141061961.23-P1P2
ARC	P1P2	ARC_-_143696008.23-P1P2	ARC_+_143696097.23-P1P2	predicted	predicted	GCTCCCGGGCGGCAAGGGAC	GTCAGTCCCTCGGTCCCCGC	ARC_-_143696008.23-P1P2|ARC_+_143696097.23-P1P2
ARCN1	P1P2	ARCN1_-_118442957.23-P1P2	ARCN1_+_118443075.23-P1P2	predicted	predicted	GAAGGCGATGACAGTGAAAG	GGGAAGCGGCGCAGGTCAAA	ARCN1_-_118442957.23-P1P2|ARCN1_+_118443075.23-P1P2
AREG	P1P2	AREG_-_75310948.23-P1P2	AREG_-_75310798.23-P1P2	predicted	predicted	GCTCCCCAAGCCTTCGAGAG	GGGCCGGGCCTTGACGTCAT	AREG_-_75310948.23-P1P2|AREG_-_75310798.23-P1P2
AREL1	P1P2	AREL1_-_75179927.23-P1P2	AREL1_-_75179976.23-P1P2	predicted	predicted	GAGAGAAGACGGTCCAAGAA	GGAAGGAGGTAGTCAGACCG	AREL1_-_75179927.23-P1P2|AREL1_-_75179976.23-P1P2
ARF1	P1P2	ARF1_-_228270258.23-P1P2	ARF1_+_228270295.23-P1P2	predicted	predicted	GTGCGCGCGAGCTAAGACCG	GAGGCGCGCTGGCTCCGGTA	ARF1_-_228270258.23-P1P2|ARF1_+_228270295.23-P1P2
ARF3	P1P2	ARF3_+_49351289.23-P1P2	ARF3_-_49351467.23-P1P2	predicted	predicted	GGGGAGGTGGGAAGTATCCC	GgaggcgggagcCGTGAATG	ARF3_+_49351289.23-P1P2|ARF3_-_49351467.23-P1P2
ARF4	P1P2	ARF4_-_57583341.23-P1P2	ARF4_-_57583431.23-P1P2	predicted	predicted	GGCTGAGGCACATGCGTACT	GCCCGGATGAAGGTATTGTC	ARF4_-_57583341.23-P1P2|ARF4_-_57583431.23-P1P2
ARF5	P1	ARF5_-_127228312.23-P1	ARF5_+_127228209.23-P1	predicted	predicted	GTAAGGGCCGCACGGGACCC	GCCCGAGCGCGGCTGAGGAA	ARF5_-_127228312.23-P1|ARF5_+_127228209.23-P1
ARF5	P2	ARF5_-_127229372.23-P2	ARF5_+_127229076.23-P2	predicted	predicted	GTACGTGGATACCGGAGGCA	GAGGGAGCCCCCTAGAGACC	ARF5_-_127229372.23-P2|ARF5_+_127229076.23-P2
ARF6	P1	ARF6_+_50359679.23-P1	ARF6_-_50359692.23-P1	predicted	predicted	GCCCGCGCGCCTAGCGTCAT	GGCGTGGCGCCCATGACGCT	ARF6_+_50359679.23-P1|ARF6_-_50359692.23-P1
ARF6	P2	ARF6_+_50361026.23-P2	ARF6_-_50361036.23-P2	predicted	predicted	GGTGGCGATAATCCTATGAA	GAAATCAAAAACCCATTCAT	ARF6_+_50361026.23-P2|ARF6_-_50361036.23-P2
ARFGAP1	P1P2	ARFGAP1_-_61904096.23-P1P2	ARFGAP1_-_61904101.23-P1P2	predicted	predicted	GGGGCGGGTGCGCGCGTCAG	GGGTGCGCGCGTCAGGGGCT	ARFGAP1_-_61904096.23-P1P2|ARFGAP1_-_61904101.23-P1P2
ARFGAP2	P1P2	ARFGAP2_+_47198979.23-P1P2	ARFGAP2_+_47198708.23-P1P2	predicted	predicted	GCTAGCGTCTGTTATGGGGC	GCGTGGGGGCGACTCCACCT	ARFGAP2_+_47198979.23-P1P2|ARFGAP2_+_47198708.23-P1P2
ARFGAP3	P1P2	ARFGAP3_+_43253324.23-P1P2	ARFGAP3_+_43253410.23-P1P2	predicted	predicted	GGGTGGACGGGCCCGGTCGT	GCACGCGCGTGCAGCGCCTG	ARFGAP3_+_43253324.23-P1P2|ARFGAP3_+_43253410.23-P1P2
ARFGEF1	P1P2	ARFGEF1_-_68256165.23-P1P2	ARFGEF1_-_68256250.23-P1P2	predicted	predicted	GGGCCCGAGCCGCAGCGCTA	GGCACCGCGCCCAGCACTTC	ARFGEF1_-_68256165.23-P1P2|ARFGEF1_-_68256250.23-P1P2
ARFGEF2	P1P2	ARFGEF2_+_47538125.23-P1P2	ARFGEF2_+_47538074.23-P1P2	predicted	predicted	Gagacagaaggcgagggtgg	Ggggcatgggcgaagggtat	ARFGEF2_+_47538125.23-P1P2|ARFGEF2_+_47538074.23-P1P2
ARFIP1	P1P2	ARFIP1_+_153700880.23-P1P2	ARFIP1_+_153700902.23-P1P2	predicted	predicted	GCAGCGACCTAATGCGCGCG	GCGTTGCCCGGGTAATTTTC	ARFIP1_+_153700880.23-P1P2|ARFIP1_+_153700902.23-P1P2
ARFIP2	P1P2	ARFIP2_-_6502715.23-P1P2	ARFIP2_-_6502754.23-P1P2	predicted	predicted	GCGGCACCGAGAAGCTGAAA	GCGCCGGTGGCGTGATGGag	ARFIP2_-_6502715.23-P1P2|ARFIP2_-_6502754.23-P1P2
ARFRP1	P1P2	ARFRP1_-_62339397.23-P1P2	ARFRP1_-_62339430.23-P1P2	predicted	predicted	GCCCGCGCGCCAAGCACTTC	GCTCGGGAGGAAGTGCCGAT	ARFRP1_-_62339397.23-P1P2|ARFRP1_-_62339430.23-P1P2
ARG1	P1P2	ARG1_+_131894156.23-P1P2	ARG1_+_131894179.23-P1P2	predicted	predicted	GGTAACCTAACTCTGAGTCT	GTATGGGGTTACTTCATACA	ARG1_+_131894156.23-P1P2|ARG1_+_131894179.23-P1P2
ARG2	P1P2	ARG2_-_68086478.23-P1P2	ARG2_-_68086523.23-P1P2	predicted	predicted	GAGTGGGGTGACGTCATCGA	GTGGGCGGGGCCTGCGAAGA	ARG2_-_68086478.23-P1P2|ARG2_-_68086523.23-P1P2
ARGFX	P1P2	ARGFX_-_121286719.23-P1P2	ARGFX_-_121286583.23-P1P2	predicted	predicted	GGGTGTGTCTGGGTGGTGCA	GCGCCTTGAAGGGTTGTCAA	ARGFX_-_121286719.23-P1P2|ARGFX_-_121286583.23-P1P2
ARGLU1	P1P2	ARGLU1_+_107220862.23-P1P2	ARGLU1_+_107220826.23-P1P2	predicted	predicted	Gtgtctccattctacgaatg	Ggcagcaagtgatgagtgca	ARGLU1_+_107220862.23-P1P2|ARGLU1_+_107220826.23-P1P2
ARHGAP1	P1P2	ARHGAP1_-_46722303.23-P1P2	ARHGAP1_+_46722272.23-P1P2	predicted	predicted	GCCCGCCTAAGTTCCTGCCT	GAACTTAGGCGGGCATGTGC	ARHGAP1_-_46722303.23-P1P2|ARHGAP1_+_46722272.23-P1P2
ARHGAP10	P1P2	ARHGAP10_-_148652966.23-P1P2	ARHGAP10_-_148653042.23-P1P2	predicted	predicted	GCCCGGGAGCCCAAGCAAAG	GACGCCTCGGAAGGAAGAGG	ARHGAP10_-_148652966.23-P1P2|ARHGAP10_-_148653042.23-P1P2
ARHGAP11A	P1P2	ARHGAP11A_-_32908029.23-P1P2	ARHGAP11A_-_32907745.23-P1P2	predicted	predicted	GGAACCAGACGGGGACAGTA	GGGGTGTCTGCGGAGGAGCT	ARHGAP11A_-_32908029.23-P1P2|ARHGAP11A_-_32907745.23-P1P2
ARHGAP11B	P1P2	ARHGAP11B_+_30917956.23-P1P2	ARHGAP11B_-_30917966.23-P1P2	predicted	predicted	GTTACGAAGAAACCGTTCTA	GCAACTGGGCTTCCGTAGAA	ARHGAP11B_+_30917956.23-P1P2|ARHGAP11B_-_30917966.23-P1P2
ARHGAP12	P1P2	ARHGAP12_-_32217889.23-P1P2	ARHGAP12_-_32217920.23-P1P2	predicted	predicted	GGGACGGTCTGGGGTGGCTA	GCCCGGCGGGGATCCGAATA	ARHGAP12_-_32217889.23-P1P2|ARHGAP12_-_32217920.23-P1P2
ARHGAP15	P1P2	ARHGAP15_-_143886821.23-P1P2	ARHGAP15_+_143886919.23-P1P2	predicted	predicted	GAGTAATGATGTGATGTGTG	GCGTAAGAGTAGGCCTGTGT	ARHGAP15_-_143886821.23-P1P2|ARHGAP15_+_143886919.23-P1P2
ARHGAP17	P1P2	ARHGAP17_+_25026815.23-P1P2	ARHGAP17_+_25026745.23-P1P2	predicted	predicted	GTCTTCGCCCGTGTCAGGTA	GcggctcggcCAGACCTAGA	ARHGAP17_+_25026815.23-P1P2|ARHGAP17_+_25026745.23-P1P2
ARHGAP18	P1P2	ARHGAP18_-_130031412.23-P1P2	ARHGAP18_-_130031505.23-P1P2	predicted	predicted	GTGGCGATTCACACGGGGAG	GTGGACAATTGCACTCTGGG	ARHGAP18_-_130031412.23-P1P2|ARHGAP18_-_130031505.23-P1P2
ARHGAP19	P1P2	ARHGAP19_+_99052563.23-P1P2	ARHGAP19_-_99052581.23-P1P2	predicted	predicted	GCCTCCCTCTTTTTCCGCCA	GCAGCCCTGGCGGAAAAAGA	ARHGAP19_+_99052563.23-P1P2|ARHGAP19_-_99052581.23-P1P2
ARHGAP20	P1P2	ARHGAP20_+_110583287.23-P1P2	ARHGAP20_+_110583278.23-P1P2	predicted	predicted	GCGCGCCgcaggctgggacg	Gggctgggacgaggctagga	ARHGAP20_+_110583287.23-P1P2|ARHGAP20_+_110583278.23-P1P2
ARHGAP21	P1P2	ARHGAP21_+_25013000.23-P1P2	ARHGAP21_-_25012992.23-P1P2	predicted	predicted	GAGCACCCCGCTCCGGCCTC	GGGGAACCGACGCTGGAGAA	ARHGAP21_+_25013000.23-P1P2|ARHGAP21_-_25012992.23-P1P2
ARHGAP22	P1P2	ARHGAP22_-_49813259.23-P1P2	ARHGAP22_+_49813297.23-P1P2	predicted	predicted	GTGGCCCGGGAGAGGGTACT	GCTCCCAGGCGGCGGCTGAA	ARHGAP22_-_49813259.23-P1P2|ARHGAP22_+_49813297.23-P1P2
ARHGAP23	P1P2	ARHGAP23_-_36584582.23-P1P2	ARHGAP23_+_36584540.23-P1P2	predicted	predicted	GGCACCCAGAAGGGAGCGCG	GCCCCGGCGGCCTCGCTCAA	ARHGAP23_-_36584582.23-P1P2|ARHGAP23_+_36584540.23-P1P2
ARHGAP24	P1P2	ARHGAP24_+_86396162.23-P1P2	ARHGAP24_+_86396159.23-P1P2	predicted	predicted	GGACTCGAGCCGCACTACAG	GTCGAGCCGCACTACAGGGG	ARHGAP24_+_86396162.23-P1P2|ARHGAP24_+_86396159.23-P1P2
ARHGAP25	P1P2	ARHGAP25_-_68961703.23-P1P2	ARHGAP25_-_68961692.23-P1P2	predicted	predicted	GGATCCGTTAGGTGAGGAAG	GTTTGGATGCTTGATCCGTT	ARHGAP25_-_68961703.23-P1P2|ARHGAP25_-_68961692.23-P1P2
ARHGAP26	P1P2	ARHGAP26_+_142149705.23-P1P2	ARHGAP26_+_142149835.23-P1P2	predicted	predicted	GGTTGCAGACCCCGAAACCT	GAGGACGCCCGGCCCTTCCG	ARHGAP26_+_142149705.23-P1P2|ARHGAP26_+_142149835.23-P1P2
ARHGAP27	P1	ARHGAP27_+_43487936.23-P1	ARHGAP27_+_43487924.23-P1	predicted	predicted	GCCACACCATGGCTATGTCT	GTATGTCTGGGCCTCGGATG	ARHGAP27_+_43487936.23-P1|ARHGAP27_+_43487924.23-P1
ARHGAP27	P2	ARHGAP27_-_43503175.23-P2	ARHGAP27_-_43503189.23-P2	predicted	predicted	GATCCCAGAGTCAGGACCAA	GACCAAGGGAAGAGTCTCAG	ARHGAP27_-_43503175.23-P2|ARHGAP27_-_43503189.23-P2
ARHGAP28	P1P2	ARHGAP28_-_6729663.23-P1P2	ARHGAP28_-_6729623.23-P1P2	predicted	predicted	GCGAATTcgcgcgcccgggg	GCGCCCCCACTCCAGCCCGT	ARHGAP28_-_6729663.23-P1P2|ARHGAP28_-_6729623.23-P1P2
ARHGAP29	P1P2	ARHGAP29_-_94703268.23-P1P2	ARHGAP29_-_94703264.23-P1P2	predicted	predicted	GcgaccgcggcAGGTACGGG	GccggcgaccgcggcAGGTA	ARHGAP29_-_94703268.23-P1P2|ARHGAP29_-_94703264.23-P1P2
ARHGAP30	P1P2	ARHGAP30_+_161039949.23-P1P2	ARHGAP30_-_161039881.23-P1P2	predicted	predicted	GcctgtgtcaACTTGCTCCC	GGGTGGGGTGATGGCGTCTG	ARHGAP30_+_161039949.23-P1P2|ARHGAP30_-_161039881.23-P1P2
ARHGAP31	P1P2	ARHGAP31_+_119013084.23-P1P2	ARHGAP31_-_119013388.23-P1P2	predicted	predicted	GCTAGAGGAAGTAGGTGGGT	GTCTCCGGGGCACTTAGTAA	ARHGAP31_+_119013084.23-P1P2|ARHGAP31_-_119013388.23-P1P2
ARHGAP32	ENST00000310343.9	ARHGAP32_-_129062323.23-ENST00000310343.9	ARHGAP32_+_129062286.23-ENST00000310343.9	predicted	predicted	GTAGACCCTCCCACTGCCTT	GGGTCTAGGTGTCACCAGTA	ARHGAP32_-_129062323.23-ENST00000310343.9|ARHGAP32_+_129062286.23-ENST00000310343.9
ARHGAP33	P1P2	ARHGAP33_-_36266257.23-P1P2	ARHGAP33_+_36266301.23-P1P2	predicted	predicted	GTGGCGCTGTCAAACTTCGA	GCCACCCGGAGGCTTCTCAT	ARHGAP33_-_36266257.23-P1P2|ARHGAP33_+_36266301.23-P1P2
ARHGAP35	ENST00000404338.3	ARHGAP35_-_47421861.23-ENST00000404338.3	ARHGAP35_-_47421796.23-ENST00000404338.3	predicted	predicted	GCCACCCCCACTAATAATGT	GTGGTGAACAGTGACCATAC	ARHGAP35_-_47421861.23-ENST00000404338.3|ARHGAP35_-_47421796.23-ENST00000404338.3
ARHGAP36	P1P2	ARHGAP36_+_130192202.23-P1P2	ARHGAP36_+_130192205.23-P1P2	predicted	predicted	GCTCGAGCATGTCACGAAGG	GCACCTCGAGCATGTCACGA	ARHGAP36_+_130192202.23-P1P2|ARHGAP36_+_130192205.23-P1P2
ARHGAP39	P1P2	ARHGAP39_+_145911422.23-P1P2	ARHGAP39_+_145911377.23-P1P2	predicted	predicted	GGAGGCCTCTGGCGCGGCGA	GATGCCGCGCGCGCCCTCCG	ARHGAP39_+_145911422.23-P1P2|ARHGAP39_+_145911377.23-P1P2
ARHGAP4	P1	ARHGAP4_-_153200587.23-P1	ARHGAP4_+_153200735.23-P1	predicted	predicted	Gacaggccagcgcacggggc	GcTGCCGAGGCGCGGAATAA	ARHGAP4_-_153200587.23-P1|ARHGAP4_+_153200735.23-P1
ARHGAP4	P2	ARHGAP4_+_153191862.23-P2	ARHGAP4_+_153191888.23-P2	predicted	predicted	GGGCAAGGCCGGGGCACAGT	GTAGGTGCAGGCCCAATGGG	ARHGAP4_+_153191862.23-P2|ARHGAP4_+_153191888.23-P2
ARHGAP40	P1P2	ARHGAP40_+_37230333.23-P1P2	ARHGAP40_-_37230363.23-P1P2	predicted	predicted	GCTGCACTGGAACTGCGAGG	GAGTTCCAGTGCAGGCGGGT	ARHGAP40_+_37230333.23-P1P2|ARHGAP40_-_37230363.23-P1P2
ARHGAP42	P1P2	ARHGAP42_-_100557871.23-P1P2	ARHGAP42_-_100557757.23-P1P2	predicted	predicted	Gggagggcaaaggggcgaag	GGAAACCAGGGGCCCAAGAG	ARHGAP42_-_100557871.23-P1P2|ARHGAP42_-_100557757.23-P1P2
ARHGAP44	P1P2	ARHGAP44_-_12692730.23-P1P2	ARHGAP44_+_12692777.23-P1P2	predicted	predicted	GCAAACTTTGGACAGAGGAA	GCGGTCCCCGTGCGCCTGTG	ARHGAP44_-_12692730.23-P1P2|ARHGAP44_+_12692777.23-P1P2
ARHGAP5	P1P2	ARHGAP5_+_32546027.23-P1P2	ARHGAP5_-_32546126.23-P1P2	predicted	predicted	GAAGGCGCGAGCTATCCAGT	Ggaggcgtcgcgaggtgaag	ARHGAP5_+_32546027.23-P1P2|ARHGAP5_-_32546126.23-P1P2
ARHGAP6	P1P2	ARHGAP6_+_11446096.23-P1P2	ARHGAP6_+_11446145.23-P1P2	predicted	predicted	GCCAGCCTGACACCTGTCGT	GGGTCCCACGGGTCCGGGGA	ARHGAP6_+_11446096.23-P1P2|ARHGAP6_+_11446145.23-P1P2
ARHGAP8	P1	ARHGAP8_-_45097909.23-P1	ARHGAP8_+_45097962.23-P1	predicted	predicted	GAGGGTGAGCACGTCCTCAG	Ggcgagggggcgtgtgcaag	ARHGAP8_-_45097909.23-P1|ARHGAP8_+_45097962.23-P1
ARHGAP8	P2	ARHGAP8_-_45148259.23-P2	ARHGAP8_-_45148274.23-P2	predicted	predicted	GCCGGGAATCGGGGTGCCCA	GCCCAGGGTGCGATGTGCGA	ARHGAP8_-_45148259.23-P2|ARHGAP8_-_45148274.23-P2
ARHGAP9	P1P2	ARHGAP9_-_57871831.23-P1P2	ARHGAP9_-_57871900.23-P1P2	predicted	predicted	GCAGAGAAGGGTCTACAGAA	GGGGCAAGTCACATCTCTAG	ARHGAP9_-_57871831.23-P1P2|ARHGAP9_-_57871900.23-P1P2
ARHGDIA	P1P2	ARHGDIA_-_79829264.23-P1P2	ARHGDIA_-_79829353.23-P1P2	predicted	predicted	GGCCCTGCCTGTCACTTCCG	GGCACGCCGTCGCCATCTTG	ARHGDIA_-_79829264.23-P1P2|ARHGDIA_-_79829353.23-P1P2
ARHGDIB	P1P2	ARHGDIB_+_15114615.23-P1P2	ARHGDIB_+_15114648.23-P1P2	predicted	predicted	GATAGGCAGTGCAAAGGAAC	GACAAGAATGCTGCTCAAGT	ARHGDIB_+_15114615.23-P1P2|ARHGDIB_+_15114648.23-P1P2
ARHGDIG	P1P2	ARHGDIG_+_330396.23-P1P2	ARHGDIG_-_330457.23-P1P2	predicted	predicted	GACGCGGACGCACGCAGCCG	GGGTCCTGGCACGCCGGCGG	ARHGDIG_+_330396.23-P1P2|ARHGDIG_-_330457.23-P1P2
ARHGEF1	P1	ARHGEF1_-_42387162.23-P1	ARHGEF1_-_42386999.23-P1	predicted	predicted	Gggcgggcaagcggcgagaa	GTTGCCCCCCAGCACCTCCG	ARHGEF1_-_42387162.23-P1|ARHGEF1_-_42386999.23-P1
ARHGEF1	P2	ARHGEF1_-_42388384.23-P2	ARHGEF1_+_42388309.23-P2	predicted	predicted	GGGGAGGAGTAGAGTCGTCG	GAGGCCAGATAGGGCCGCTC	ARHGEF1_-_42388384.23-P2|ARHGEF1_+_42388309.23-P2
ARHGEF10	P1P2	ARHGEF10_-_1771967.23-P1P2	ARHGEF10_-_1771977.23-P1P2	predicted	predicted	GGGCGGCCACGTGGCCTCGA	GTGGCCTCGAAGGAATGCGC	ARHGEF10_-_1771967.23-P1P2|ARHGEF10_-_1771977.23-P1P2
ARHGEF10L	P1P2	ARHGEF10L_-_17866046.23-P1P2	ARHGEF10L_+_17866076.23-P1P2	predicted	predicted	GGGGCTGCCGGGACCGCTGG	GTGCTCCCAGCGCGCCGCGA	ARHGEF10L_-_17866046.23-P1P2|ARHGEF10L_+_17866076.23-P1P2
ARHGEF11	P1P2	ARHGEF11_+_157015807.23-P1P2	ARHGEF11_+_157015639.23-P1P2	predicted	predicted	GACAGGGGCGGGCCGGTCGG	Ggggaaggagaaaggctcgc	ARHGEF11_+_157015807.23-P1P2|ARHGEF11_+_157015639.23-P1P2
ARHGEF12	P1P2	ARHGEF12_-_120206976.23-P1P2	ARHGEF12_-_120207012.23-P1P2	predicted	predicted	GGGGGCCATAAAGTCGGCGG	GCTCGCGCCGGACGCGGCCA	ARHGEF12_-_120206976.23-P1P2|ARHGEF12_-_120207012.23-P1P2
ARHGEF15	P1P2	ARHGEF15_+_8213591.23-P1P2	ARHGEF15_+_8213479.23-P1P2	predicted	predicted	GccttggagcgaggaatgCA	GCCCACCCAGCCATTGTGTC	ARHGEF15_+_8213591.23-P1P2|ARHGEF15_+_8213479.23-P1P2
ARHGEF16	P1P2	ARHGEF16_-_3371083.23-P1P2	ARHGEF16_-_3371034.23-P1P2	predicted	predicted	GGCTCCAGCCGGCCCAGGTG	GCGGCTCGGCGGGAATCGAG	ARHGEF16_-_3371083.23-P1P2|ARHGEF16_-_3371034.23-P1P2
ARHGEF17	P1P2	ARHGEF17_+_73019253.23-P1P2	ARHGEF17_+_73019197.23-P1P2	predicted	predicted	GGCCTCGCGCCCAAAAGAGG	GTGGTGGGAGGGAATCAGGG	ARHGEF17_+_73019253.23-P1P2|ARHGEF17_+_73019197.23-P1P2
ARHGEF18	P1P2	ARHGEF18_+_7459871.23-P1P2	ARHGEF18_+_7459922.23-P1P2	predicted	predicted	GGCTCCCCGAGCCGTGGTGA	GGAAGGAGGCGTGCCCTCGA	ARHGEF18_+_7459871.23-P1P2|ARHGEF18_+_7459922.23-P1P2
ARHGEF19	P1P2	ARHGEF19_+_16533655.23-P1P2	ARHGEF19_+_16533690.23-P1P2	predicted	predicted	GGGCCAGCGCCCGCGAACTG	GCCCCCAGCCGTCCTCTATC	ARHGEF19_+_16533655.23-P1P2|ARHGEF19_+_16533690.23-P1P2
ARHGEF2	P1P2	ARHGEF2_-_155948470.23-P1P2	ARHGEF2_-_155948492.23-P1P2	predicted	predicted	GGGGACGCCAGGGTTTGTGT	GGGCAGCTCGGAGAGGTACG	ARHGEF2_-_155948470.23-P1P2|ARHGEF2_-_155948492.23-P1P2
ARHGEF25	P1P2	ARHGEF25_-_58005144.23-P1P2	ARHGEF25_-_58005071.23-P1P2	predicted	predicted	GGAACCCGGCGCAGGCAGGA	GTGGGGAGGGGAAAAAGCGC	ARHGEF25_-_58005144.23-P1P2|ARHGEF25_-_58005071.23-P1P2
ARHGEF26	P1P2	ARHGEF26_-_153839066.23-P1P2	ARHGEF26_-_153839076.23-P1P2	predicted	predicted	GGGAGACTGGGGCTGATTGT	GGCTGATTGTAGGCACGCGG	ARHGEF26_-_153839066.23-P1P2|ARHGEF26_-_153839076.23-P1P2
ARHGEF28	P1P2	ARHGEF28_+_72921978.23-P1P2	ARHGEF28_-_72921884.23-P1P2	predicted	predicted	GGGGCTGAAGCCAAGGTTTA	GTGGGCAGGCGGGGATCCAG	ARHGEF28_+_72921978.23-P1P2|ARHGEF28_-_72921884.23-P1P2
ARHGEF3	P1P2	ARHGEF3_-_56836125.23-P1P2	ARHGEF3_+_56836185.23-P1P2	predicted	predicted	GTGGGGCTGCGAGGGGCGTG	GAATCGCGGCCCACGCTCTG	ARHGEF3_-_56836125.23-P1P2|ARHGEF3_+_56836185.23-P1P2
ARHGEF33	ENST00000398800.4	ARHGEF33_+_39146297.23-ENST00000398800.4	ARHGEF33_+_39146343.23-ENST00000398800.4	predicted	predicted	GAATTCATTATTCAAATTTA	GAAGTACACATTTAGCATAA	ARHGEF33_+_39146297.23-ENST00000398800.4|ARHGEF33_+_39146343.23-ENST00000398800.4
ARHGEF35	ENST00000378115.2	ARHGEF35_-_143892912.23-ENST00000378115.2	ARHGEF35_+_143892900.23-ENST00000378115.2	predicted	predicted	GAGTGCCGGGCCGGCGGAGA	GCCCGGGCTCCCCTCTCCGC	ARHGEF35_-_143892912.23-ENST00000378115.2|ARHGEF35_+_143892900.23-ENST00000378115.2
ARHGEF35	ENST00000543357.1	ARHGEF35_+_143991308.23-ENST00000543357.1	ARHGEF35_-_143991487.23-ENST00000543357.1	predicted	predicted	GGCCAGGGGCGGGTCGCGGG	GTGGGAAGTgccgggccggc	ARHGEF35_+_143991308.23-ENST00000543357.1|ARHGEF35_-_143991487.23-ENST00000543357.1
ARHGEF37	P1	ARHGEF37_-_148960762.23-P1	ARHGEF37_+_148960875.23-P1	predicted	predicted	GCCGGGGTCAGCATTCCCAC	GTGGCTGGCAGCCAACCCGA	ARHGEF37_-_148960762.23-P1|ARHGEF37_+_148960875.23-P1
ARHGEF37	P2	ARHGEF37_-_148931046.23-P2	ARHGEF37_-_148931055.23-P2	predicted	predicted	GCGAAGGATCGGCAGCGAGA	GGGCAGCGAGAGGGCGGAAC	ARHGEF37_-_148931046.23-P2|ARHGEF37_-_148931055.23-P2
ARHGEF38	P1P2	ARHGEF38_+_106473476.23-P1P2	ARHGEF38_+_106473462.23-P1P2	predicted	predicted	GGGTGTGTGCAGGTGCACTC	GCACTCAGGGCACTGTGTTG	ARHGEF38_+_106473476.23-P1P2|ARHGEF38_+_106473462.23-P1P2
ARHGEF39	P1P2	ARHGEF39_+_35665327.23-P1P2	ARHGEF39_-_35665397.23-P1P2	predicted	predicted	GAAAGCGCCGCTCTGGCGGT	GcagggcagggcaaggTTGG	ARHGEF39_+_35665327.23-P1P2|ARHGEF39_-_35665397.23-P1P2
ARHGEF4	P1P2	ARHGEF4_+_131792477.23-P1P2	ARHGEF4_+_131792418.23-P1P2	predicted	predicted	GGCAACCCTGGCAACCAAGC	GAGGCTCAGAGGGACCGCGG	ARHGEF4_+_131792477.23-P1P2|ARHGEF4_+_131792418.23-P1P2
ARHGEF40	P1P2	ARHGEF40_-_21538323.23-P1P2	ARHGEF40_-_21538302.23-P1P2	predicted	predicted	GGGAGACAGAGTCCCGGCAA	GAACGGCAGAGATCTCGGCG	ARHGEF40_-_21538323.23-P1P2|ARHGEF40_-_21538302.23-P1P2
ARHGEF5	P1P2	ARHGEF5_+_144052316.23-P1P2	ARHGEF5_+_144052260.23-P1P2	predicted	predicted	GTGGGAAGTgccgggccggc	GcTGTCCCAGGGAGCCCCGA	ARHGEF5_+_144052316.23-P1P2|ARHGEF5_+_144052260.23-P1P2
ARHGEF6	P1P2	ARHGEF6_+_135863094.23-P1P2	ARHGEF6_-_135863164.23-P1P2	predicted	predicted	GGCAGATGCAATCGCGGATG	GTCGGGTGCTTGCAGAGCAA	ARHGEF6_+_135863094.23-P1P2|ARHGEF6_-_135863164.23-P1P2
ARHGEF7	ENST00000370623.3	ARHGEF7_-_111767532.23-ENST00000370623.3	ARHGEF7_+_111767720.23-ENST00000370623.3	predicted	predicted	GcGCGCACGGCCTGGAGCGG	GCGGCCCAGCAGGTCCGGCC	ARHGEF7_-_111767532.23-ENST00000370623.3|ARHGEF7_+_111767720.23-ENST00000370623.3
ARHGEF9	P1P2	ARHGEF9_+_62975075.23-P1P2	ARHGEF9_+_62975107.23-P1P2	predicted	predicted	GTGGTCGGCGGGTATGTCAG	GGGCAGCGAACGTGCTACTG	ARHGEF9_+_62975075.23-P1P2|ARHGEF9_+_62975107.23-P1P2
ARID1B	P1	ARID1B_-_157098655.23-P1	ARID1B_-_157098738.23-P1	predicted	predicted	GGGAGCAGGCCCAGAGCGTA	GGGGCCGCGTGGATGCGCAC	ARID1B_-_157098655.23-P1|ARID1B_-_157098738.23-P1
ARID1B	P2	ARID1B_+_157099950.23-P2	ARID1B_-_157099854.23-P2	predicted	predicted	GCCGGCTGTAGCCCGGATAA	GACAACAAAGCCCCGGGATG	ARID1B_+_157099950.23-P2|ARID1B_-_157099854.23-P2
ARID2	P1P2	ARID2_+_46123117.23-P1P2	ARID2_+_46123100.23-P1P2	predicted	predicted	GCAAGGCGAGCCGATGGTGA	GGAGGGGTCTGGGCGGCCAG	ARID2_+_46123117.23-P1P2|ARID2_+_46123100.23-P1P2
ARID3A	P1P2	ARID3A_-_925866.23-P1P2	ARID3A_+_925869.23-P1P2	predicted	predicted	GGGGCGTGCGGGGAAAAGTG	GgcgcgggAGGGCCTCGCCA	ARID3A_-_925866.23-P1P2|ARID3A_+_925869.23-P1P2
ARID3B	P1P2	ARID3B_+_74833318.23-P1P2	ARID3B_+_74833437.23-P1P2	predicted	predicted	GGCAAAGTGCGGACACAGAG	GCTGCTAGAAAGGGACCGGG	ARID3B_+_74833318.23-P1P2|ARID3B_+_74833437.23-P1P2
ARID3C	P1P2	ARID3C_-_34628746.23-P1P2	ARID3C_-_34628663.23-P1P2	predicted	predicted	Gagagggaccgacagagaca	Gtagacaggggttgagatat	ARID3C_-_34628746.23-P1P2|ARID3C_-_34628663.23-P1P2
ARID4A	P1P2	ARID4A_+_58765189.23-P1P2	ARID4A_+_58764976.23-P1P2	predicted	predicted	GACGCCGAAGAGCTTCGGAT	GCACTGATTGGTGAATTGAG	ARID4A_+_58765189.23-P1P2|ARID4A_+_58764976.23-P1P2
ARID4B	P1P2	ARID4B_+_235491628.23-P1P2	ARID4B_-_235491655.23-P1P2	predicted	predicted	GACCAATAGGAACAGTGTAT	GCACTGTTCCTATTGGTCCC	ARID4B_+_235491628.23-P1P2|ARID4B_-_235491655.23-P1P2
ARID5A	P1P2	ARID5A_+_97202343.23-P1P2	ARID5A_-_97202360.23-P1P2	predicted	predicted	GGGGACCGCCCTTGAGTCCG	GAGGTCCCCGGACTCAAGGG	ARID5A_+_97202343.23-P1P2|ARID5A_-_97202360.23-P1P2
ARID5B	ENST00000279873.7	ARID5B_-_63660959.23-ENST00000279873.7	ARID5B_-_63660971.23-ENST00000279873.7	predicted	predicted	GAGAAAGAGGAGCAGCGCCC	GAGCGCCCCGGAATCTCTGC	ARID5B_-_63660959.23-ENST00000279873.7|ARID5B_-_63660971.23-ENST00000279873.7
ARIH1	P1P2	ARIH1_+_72766525.23-P1P2	ARIH1_-_72766504.23-P1P2	predicted	predicted	GCCTGGGCCTGGGACCCGAG	GAGCGGCAGCGGATCGAACC	ARIH1_+_72766525.23-P1P2|ARIH1_-_72766504.23-P1P2
ARIH2	P1P2	ARIH2_-_48956150.23-P1P2	ARIH2_-_48956106.23-P1P2	predicted	predicted	GCCGTACCCTGGTCAGACTC	GGACGCTGGTAGGCGAATAG	ARIH2_-_48956150.23-P1P2|ARIH2_-_48956106.23-P1P2
ARIH2OS	P1P2	ARIH2OS_-_48957394.23-P1P2	ARIH2OS_+_48956874.23-P1P2	predicted	predicted	GTCCCCTGAACATGTGACTT	GCCGGGGCCGCACATCCCTA	ARIH2OS_-_48957394.23-P1P2|ARIH2OS_+_48956874.23-P1P2
ARL1	P1P2	ARL1_+_101801440.23-P1P2	ARL1_+_101801513.23-P1P2	predicted	predicted	GAATCACTGAAGATCGGCGA	GAGTCCGACGTGGAAGTTGC	ARL1_+_101801440.23-P1P2|ARL1_+_101801513.23-P1P2
ARL10	P1P2	ARL10_-_175792443.23-P1P2	ARL10_+_175792307.23-P1P2	predicted	predicted	GACAGCGGCAGTGCATTGTG	GGAAGGAGAGGCTGTGCCTG	ARL10_-_175792443.23-P1P2|ARL10_+_175792307.23-P1P2
ARL11	P1P2	ARL11_-_50202555.23-P1P2	ARL11_-_50202517.23-P1P2	predicted	predicted	GACTGCTCTGAGGCGCCCTA	GAGAGCCGGGGACCTCTCTG	ARL11_-_50202555.23-P1P2|ARL11_-_50202517.23-P1P2
ARL13A	P1P2	ARL13A_-_100224608.23-P1P2	ARL13A_-_100224250.23-P1P2	predicted	predicted	GGTTGCTATGAACCAGGTAG	GAGAGCAGAGGCAGTTTCTC	ARL13A_-_100224608.23-P1P2|ARL13A_-_100224250.23-P1P2
ARL13B	P1P2	ARL13B_+_93698915.23-P1P2	ARL13B_+_93698909.23-P1P2	predicted	predicted	GACTGCGCTCGCCCAATCAT	GCTCGCCCAATCATCGGTTG	ARL13B_+_93698915.23-P1P2|ARL13B_+_93698909.23-P1P2
ARL14	P1P2	ARL14_+_160394749.23-P1P2	ARL14_+_160394893.23-P1P2	predicted	predicted	GGAAATCTAGAGGAACCTGA	GCAGTCCCAGCCAATCCTGA	ARL14_+_160394749.23-P1P2|ARL14_+_160394893.23-P1P2
ARL14EP	P1P2	ARL14EP_-_30344473.23-P1P2	ARL14EP_+_30344544.23-P1P2	predicted	predicted	GCACATCCCTAACCTCTCGG	GGCCGCCTCCGGGGACGGAA	ARL14EP_-_30344473.23-P1P2|ARL14EP_+_30344544.23-P1P2
ARL14EPL	ENST00000601302.2	ARL14EPL_-_115387045.23-ENST00000601302.2	ARL14EPL_-_115386982.23-ENST00000601302.2	predicted	predicted	GTGGGAGTACAGATACAGTC	GCCTCAGTAGGGTGGTCTGG	ARL14EPL_-_115387045.23-ENST00000601302.2|ARL14EPL_-_115386982.23-ENST00000601302.2
ARL15	P1P2	ARL15_-_53606554.23-P1P2	ARL15_-_53606520.23-P1P2	predicted	predicted	GGGTGGCAGGAGAGAAACGC	GTGGCTGCGGCGCCTATAAA	ARL15_-_53606554.23-P1P2|ARL15_-_53606520.23-P1P2
ARL16	P1P2	ARL16_-_79651018.23-P1P2	ARL16_+_79650977.23-P1P2	predicted	predicted	GTGCGCGCACTGGAGGGAAA	GCACGCGCACGTCACCGCGC	ARL16_-_79651018.23-P1P2|ARL16_+_79650977.23-P1P2
ARL17A	ENST00000329240.4,ENST00000336125.5,ENST00000445552.2	ARL17A_+_44657565.23-ENST00000329240.4,ENST00000336125.5,ENST00000445552.2	ARL17A_+_44657569.23-ENST00000329240.4,ENST00000336125.5,ENST00000445552.2	predicted	predicted	GAATCTGTGTAGAGGTGGGA	GTGAAAATCTGTGTAGAGGT	ARL17A_+_44657565.23-ENST00000329240.4,ENST00000336125.5,ENST00000445552.2|ARL17A_+_44657569.23-ENST00000329240.4,ENST00000336125.5,ENST00000445552.2
ARL17B	ENST00000434041.2,ENST00000450673.3,ENST00000570618.1	ARL17B_+_44439458.23-ENST00000434041.2,ENST00000450673.3,ENST00000570618.1	ARL17B_+_44439640.23-ENST00000434041.2,ENST00000450673.3,ENST00000570618.1	predicted	predicted	GTGTCCCCTCCCGGTTGGTG	GAATCTGTGTAGAGGTGGGA	ARL17B_+_44439458.23-ENST00000434041.2,ENST00000450673.3,ENST00000570618.1|ARL17B_+_44439640.23-ENST00000434041.2,ENST00000450673.3,ENST00000570618.1
ARL2	P1P2	ARL2_+_64781446.23-P1P2	ARL2_-_64781529.23-P1P2	predicted	predicted	GCTGACGCTGCGCCTCCCGA	GACCCTCGCAGCAGCTGCGC	ARL2_+_64781446.23-P1P2|ARL2_-_64781529.23-P1P2
ARL2BP	P1P2	ARL2BP_-_57278988.23-P1P2	ARL2BP_+_57278948.23-P1P2	predicted	predicted	GCGGCCGTGAGGCGGTGGAA	GCCGGCCGGCATCCAATCAC	ARL2BP_-_57278988.23-P1P2|ARL2BP_+_57278948.23-P1P2
ARL3	P1P2	ARL3_-_104474293.23-P1P2	ARL3_-_104474342.23-P1P2	predicted	predicted	GTGGAGAAAGCCTGCCCACG	GGGTCGAAAAGGAGGGGCGT	ARL3_-_104474293.23-P1P2|ARL3_-_104474342.23-P1P2
ARL4A	P1P2	ARL4A_-_12726341.23-P1P2	ARL4A_+_12727020.23-P1P2	predicted	predicted	GCTACCCGGAGCAACCGTTC	GAAAAGGCGGCGTTCCCAGA	ARL4A_-_12726341.23-P1P2|ARL4A_+_12727020.23-P1P2
ARL4C	P1P2	ARL4C_+_235405845.23-P1P2	ARL4C_+_235405481.23-P1P2	predicted	predicted	Gcgaagcgcgcgaaaacggc	GGGAGGGCGCCGAACATCTG	ARL4C_+_235405845.23-P1P2|ARL4C_+_235405481.23-P1P2
ARL4D	P1P2	ARL4D_+_41476237.23-P1P2	ARL4D_-_41476255.23-P1P2	predicted	predicted	GCAGCCCCCACCATACGCGG	GGCCCCTCCGCGTATGGTGG	ARL4D_+_41476237.23-P1P2|ARL4D_-_41476255.23-P1P2
ARL5A	P1P2	ARL5A_-_152685082.23-P1P2	ARL5A_+_152685086.23-P1P2	predicted	predicted	GAGGGGCGGAGCGTAGGAAA	GCAAATAAGCGAGGACAGGG	ARL5A_-_152685082.23-P1P2|ARL5A_+_152685086.23-P1P2
ARL5B	P1P2	ARL5B_-_18948194.23-P1P2	ARL5B_+_18948215.23-P1P2	predicted	predicted	GGAAGAAAACGCCACGTCGA	GGAAGCTAGGCGCGTGACGA	ARL5B_-_18948194.23-P1P2|ARL5B_+_18948215.23-P1P2
ARL5C	P1P2	ARL5C_+_37322594.23-P1P2	ARL5C_+_37322379.23-P1P2	predicted	predicted	GAGAAGTTGCCAAGCATCAA	GAGACATGGCACTCAGAGGA	ARL5C_+_37322594.23-P1P2|ARL5C_+_37322379.23-P1P2
ARL6	P1P2	ARL6_+_97483359.23-P1P2	ARL6_-_97483297.23-P1P2	predicted	predicted	GGTAGCATCATGGGAGTTGT	GTGGATCCCCAGGAAGACCA	ARL6_+_97483359.23-P1P2|ARL6_-_97483297.23-P1P2
ARL6IP1	P1	ARL6IP1_-_18813112.23-P1	ARL6IP1_-_18813082.23-P1	predicted	predicted	GACGCCCCGCCCAGCGCTGT	GAGTGCCCAATCAGCGCCCA	ARL6IP1_-_18813112.23-P1|ARL6IP1_-_18813082.23-P1
ARL6IP1	P2	ARL6IP1_-_18809549.23-P2	ARL6IP1_-_18809567.23-P2	predicted	predicted	Ggctgatatcatagctgcag	GgtggttaaGTATATATCAa	ARL6IP1_-_18809549.23-P2|ARL6IP1_-_18809567.23-P2
ARL6IP4	P1P2	ARL6IP4_+_123465040.23-P1P2	ARL6IP4_-_123465153.23-P1P2	predicted	predicted	GGAAGCTGCGCCCACTTCCA	GCGCGCCCGGGACGGAACCT	ARL6IP4_+_123465040.23-P1P2|ARL6IP4_-_123465153.23-P1P2
ARL6IP5	P1P2	ARL6IP5_+_69133989.23-P1P2	ARL6IP5_+_69134055.23-P1P2	predicted	predicted	GTGGTTGGGTACAGGAAAAC	GCAGCAGAGCAAAGGAAATT	ARL6IP5_+_69133989.23-P1P2|ARL6IP5_+_69134055.23-P1P2
ARL6IP6	P1P2	ARL6IP6_-_153574153.23-P1P2	ARL6IP6_+_153574314.23-P1P2	predicted	predicted	GGCGTCGCCTGCATGGGGGG	GGGCGTACGTAACTCGGGCG	ARL6IP6_-_153574153.23-P1P2|ARL6IP6_+_153574314.23-P1P2
ARL8A	P1P2	ARL8A_+_202113963.23-P1P2	ARL8A_-_202114002.23-P1P2	predicted	predicted	GGGCCCCCCGGCTCCAGCGA	GGGCCAGGGGCCGCACCCGC	ARL8A_+_202113963.23-P1P2|ARL8A_-_202114002.23-P1P2
ARL8B	P1P2	ARL8B_-_5163843.23-P1P2	ARL8B_+_5163865.23-P1P2	predicted	predicted	GAAGCCTCAAGGGGGCCCGA	GGCTGGCATCGCCACCTGGT	ARL8B_-_5163843.23-P1P2|ARL8B_+_5163865.23-P1P2
ARL9	P1P2	ARL9_+_57371416.23-P1P2	ARL9_-_57371447.23-P1P2	predicted	predicted	GTGTCTCCAGACTACTACCC	GAGTCTGGAGACACTCCTAG	ARL9_+_57371416.23-P1P2|ARL9_-_57371447.23-P1P2
ARMC1	P1P2	ARMC1_+_66546603.23-P1P2	ARMC1_-_66546582.23-P1P2	predicted	predicted	GGGTGGACGGCGAGTAGTTA	GTCAAGGGACTGATCCAATG	ARMC1_+_66546603.23-P1P2|ARMC1_-_66546582.23-P1P2
ARMC10	P1P2	ARMC10_+_102715089.23-P1P2	ARMC10_+_102715459.23-P1P2	predicted	predicted	GCGTCGGTGGGGAGTTAGAA	GCGGGGCGCTGCACACCGGG	ARMC10_+_102715089.23-P1P2|ARMC10_+_102715459.23-P1P2
ARMC12	P1P2	ARMC12_+_35704741.23-P1P2	ARMC12_+_35704714.23-P1P2	predicted	predicted	GAAGGAAACTGGGGAGATAA	GAGGGCAGTGGTCAGGAAAT	ARMC12_+_35704741.23-P1P2|ARMC12_+_35704714.23-P1P2
ARMC2	P1P2	ARMC2_-_109169470.23-P1P2	ARMC2_+_109169497.23-P1P2	predicted	predicted	GGGGAGCAACAAATGTGGTT	GTCAGAGCAGGCGTCGTGGG	ARMC2_-_109169470.23-P1P2|ARMC2_+_109169497.23-P1P2
ARMC3	P1P2	ARMC3_+_23216876.23-P1P2	ARMC3_+_23216906.23-P1P2	predicted	predicted	GGCGCCCATTGTCCCGCCGA	GTGCGCCCTGGGAACGCTCG	ARMC3_+_23216876.23-P1P2|ARMC3_+_23216906.23-P1P2
ARMC4	P1P2	ARMC4_+_28288124.23-P1P2	ARMC4_-_28288193.23-P1P2	predicted	predicted	GCACCGCGTGGAGTGAGTTA	GTGAGCAGTTGCGGGGTCGG	ARMC4_+_28288124.23-P1P2|ARMC4_-_28288193.23-P1P2
ARMC5	P1P2	ARMC5_-_31470699.23-P1P2	ARMC5_-_31470430.23-P1P2	predicted	predicted	GGTGCAAGGACAGACTTCCG	GGGGCCGCACCACCGCTGGG	ARMC5_-_31470699.23-P1P2|ARMC5_-_31470430.23-P1P2
ARMC6	P1P2	ARMC6_+_19144378.23-P1P2	ARMC6_+_19144244.23-P1P2	predicted	predicted	GccTGCGCACCAGGACTCGG	GTCCGCGCGCGGTGGTCTCG	ARMC6_+_19144378.23-P1P2|ARMC6_+_19144244.23-P1P2
ARMC7	P1P2	ARMC7_+_73105997.23-P1P2	ARMC7_-_73106015.23-P1P2	predicted	predicted	GGGGCCGTCGCCGAACTCCT	GGCGCCAAGGAGTTCGGCGA	ARMC7_+_73105997.23-P1P2|ARMC7_-_73106015.23-P1P2
ARMC8	P1P2	ARMC8_+_137906205.23-P1P2	ARMC8_+_137906227.23-P1P2	predicted	predicted	GCAAAAGGGAATGGCGTCAG	GGAAAGGCCCGCAGAAAGAA	ARMC8_+_137906205.23-P1P2|ARMC8_+_137906227.23-P1P2
ARMC9	P1P2	ARMC9_-_232063283.23-P1P2	ARMC9_-_232063286.23-P1P2	predicted	predicted	GCTCCCAGGCTGCTCCGCGT	GCCAGGCTGCTCCGCGTCGG	ARMC9_-_232063283.23-P1P2|ARMC9_-_232063286.23-P1P2
ARMCX1	P1P2	ARMCX1_-_100805375.23-P1P2	ARMCX1_-_100805379.23-P1P2	predicted	predicted	Gaagctacttctagtctccg	Gtacttctagtctccggggt	ARMCX1_-_100805375.23-P1P2|ARMCX1_-_100805379.23-P1P2
ARMCX2	P1P2	ARMCX2_-_100915112.23-P1P2	ARMCX2_+_100914983.23-P1P2	predicted	predicted	Gaggggctgcatcttctcgg	Gtgacaggacctgatgtggt	ARMCX2_-_100915112.23-P1P2|ARMCX2_+_100914983.23-P1P2
ARMCX3	P1P2	ARMCX3_-_100878098.23-P1P2	ARMCX3_-_100878026.23-P1P2	predicted	predicted	GGGAAATTGGGGACCCGAGT	GAGTAATAAGGCCTGGTGTG	ARMCX3_-_100878098.23-P1P2|ARMCX3_-_100878026.23-P1P2
ARMCX4	P1P2	ARMCX4_-_100740165.23-P1P2	ARMCX4_+_100740266.23-P1P2	predicted	predicted	GCTCCCCTGTAACTGAAGAT	GCACAGACATCCCCGTTCTC	ARMCX4_-_100740165.23-P1P2|ARMCX4_+_100740266.23-P1P2
ARMCX5	P1P2	ARMCX5_-_101854348.23-P1P2	ARMCX5_+_101854400.23-P1P2	predicted	predicted	GCGGCCACAGGGTACAGGAC	GGGGATCCGGCTTATGGAAG	ARMCX5_-_101854348.23-P1P2|ARMCX5_+_101854400.23-P1P2
ARMCX5-GPRASP2	P1P2	ARMCX5-GPRASP2_-_101854348.23-P1P2	ARMCX5-GPRASP2_+_101854400.23-P1P2	predicted	predicted	GCGGCCACAGGGTACAGGAC	GGGGATCCGGCTTATGGAAG	ARMCX5-GPRASP2_-_101854348.23-P1P2|ARMCX5-GPRASP2_+_101854400.23-P1P2
ARMCX6	P1P2	ARMCX6_+_100873032.23-P1P2	ARMCX6_+_100873220.23-P1P2	predicted	predicted	GCGCCTGCCGCACTGCTTGT	GGTAAATGAAGGGTAGACTC	ARMCX6_+_100873032.23-P1P2|ARMCX6_+_100873220.23-P1P2
ARMS2	P1P2	ARMS2_-_124214196.23-P1P2	ARMS2_+_124213755.23-P1P2	predicted	predicted	GAGTGAGATGGCAGCTGGCT	Gaacttgaatgatgtagcga	ARMS2_-_124214196.23-P1P2|ARMS2_+_124213755.23-P1P2
ARNT	P1P2	ARNT_-_150849249.23-P1P2	ARNT_-_150849190.23-P1P2	predicted	predicted	GGAGACCCCGCCTATATAGT	GACCGCGGAATCCAAGATGG	ARNT_-_150849249.23-P1P2|ARNT_-_150849190.23-P1P2
ARNT2	P1P2	ARNT2_-_80696629.23-P1P2	ARNT2_+_80696524.23-P1P2	predicted	predicted	GgccccccgccgcgcgACAA	GGGACCCCCAAGTTGGGCGC	ARNT2_-_80696629.23-P1P2|ARNT2_+_80696524.23-P1P2
ARNTL	P1P2	ARNTL_-_13299200.23-P1P2	ARNTL_-_13299253.23-P1P2	predicted	predicted	GTCCCTTCGGGCGTTCGGAT	GCGGCTCCTCCATTGGTGGG	ARNTL_-_13299200.23-P1P2|ARNTL_-_13299253.23-P1P2
ARNTL2	P1P2	ARNTL2_+_27485547.23-P1P2	ARNTL2_+_27485723.23-P1P2	predicted	predicted	GACCCTCGGGGCAAAGGTAA	GGGAAAGAGACCCGGGCCAA	ARNTL2_+_27485547.23-P1P2|ARNTL2_+_27485723.23-P1P2
ARPC1A	P1P2	ARPC1A_-_98923363.23-P1P2	ARPC1A_+_98923436.23-P1P2	predicted	predicted	GGGGCAGCATCTCCTCTGAA	GCCGCGCATGCGCACAGCTC	ARPC1A_-_98923363.23-P1P2|ARPC1A_+_98923436.23-P1P2
ARPC1B	P1P2	ARPC1B_-_98972228.23-P1P2	ARPC1B_+_98972186.23-P1P2	predicted	predicted	GGCAGCACCCCCACCCCGAA	GCCGGTACCCGCGCAGACGT	ARPC1B_-_98972228.23-P1P2|ARPC1B_+_98972186.23-P1P2
ARPC2	P1	ARPC2_+_219081760.23-P1	ARPC2_-_219081706.23-P1	predicted	predicted	GGGCGCGCCGGAGGAAACGG	GGTAGGCGGTAGACGTAAGC	ARPC2_+_219081760.23-P1|ARPC2_-_219081706.23-P1
ARPC2	P2	ARPC2_+_219103379.23-P2	ARPC2_+_219103424.23-P2	predicted	predicted	GAAGAGACATTGTATCCTGG	GCAATGGAATCCTTGGATGC	ARPC2_+_219103379.23-P2|ARPC2_+_219103424.23-P2
ARPC3	P1	ARPC3_-_110888307.23-P1	ARPC3_-_110888168.23-P1	predicted	predicted	GCAGCGCCCAGAATGGAGAT	GAGGCGGAAGCGAAACGGAA	ARPC3_-_110888307.23-P1|ARPC3_-_110888168.23-P1
ARPC3	P2	ARPC3_-_110883503.23-P2	ARPC3_-_110883495.23-P2	predicted	predicted	GTAGCAGcattgaggtgcga	GAGAAGGGATAGCAGcattg	ARPC3_-_110883503.23-P2|ARPC3_-_110883495.23-P2
ARPC4	P1P2	ARPC4_-_9834665.23-P1P2	ARPC4_-_9834191.23-P1P2	predicted	predicted	GAAGGCCCAAGCGTTCGTAA	GCCCCTTGCAGTTGACGCGG	ARPC4_-_9834665.23-P1P2|ARPC4_-_9834191.23-P1P2
ARPC4-TTLL3	P1	ARPC4-TTLL3_+_9834072.23-P1	ARPC4-TTLL3_+_9834086.23-P1	predicted	predicted	GGTAGGAGGCCGCAGCGAGG	GCGGCCCCTGGGGCCGTAGG	ARPC4-TTLL3_+_9834072.23-P1|ARPC4-TTLL3_+_9834086.23-P1
ARPC4-TTLL3	P2	ARPC4-TTLL3_+_9839072.23-P2	ARPC4-TTLL3_+_9839200.23-P2	predicted	predicted	GTAACCTGGGGTCAGACCAG	GACTGTGAACAGAACAGACT	ARPC4-TTLL3_+_9839072.23-P2|ARPC4-TTLL3_+_9839200.23-P2
ARPC5	P1P2	ARPC5_+_183604994.23-P1P2	ARPC5_-_183605092.23-P1P2	predicted	predicted	GGGAAGAGCAGGGGCAGCGT	GTCTCCGCAGGCAAGGGGCG	ARPC5_+_183604994.23-P1P2|ARPC5_-_183605092.23-P1P2
ARPC5L	P1	ARPC5L_+_127631339.23-P1	ARPC5L_-_127631322.23-P1	predicted	predicted	GGGCACCTGGAGTGCGGTAT	GCGTGGAAGGGACACTGAGG	ARPC5L_+_127631339.23-P1|ARPC5L_-_127631322.23-P1
ARPC5L	P2	ARPC5L_-_127624243.23-P2	ARPC5L_-_127624248.23-P2	predicted	predicted	GTCCGAGGGAAAGAGGAAGT	GGGGAAAGAGGAAGTAGGCG	ARPC5L_-_127624243.23-P2|ARPC5L_-_127624248.23-P2
ARPP19	P1P2	ARPP19_+_52861307.23-P1P2	ARPP19_-_52861422.23-P1P2	predicted	predicted	GGGGAGAAGCGGGGTCAAGT	GTGGCTGCCGAGTGCTTCCT	ARPP19_+_52861307.23-P1P2|ARPP19_-_52861422.23-P1P2
ARPP21	ENST00000187397.4	ARPP21_+_35683617.23-ENST00000187397.4	ARPP21_+_35683447.23-ENST00000187397.4	predicted	predicted	GTCTGAGCTAAATACTGCAA	GGAATGGCATAAATCATGCC	ARPP21_+_35683617.23-ENST00000187397.4|ARPP21_+_35683447.23-ENST00000187397.4
ARR3	P1P2	ARR3_+_69488041.23-P1P2	ARR3_+_69487819.23-P1P2	predicted	predicted	GAGTTCAGGTGCCAAGAGTT	GCATGGTGGGGGATTGAAAT	ARR3_+_69488041.23-P1P2|ARR3_+_69487819.23-P1P2
ARRB1	P1P2	ARRB1_-_75062870.23-P1P2	ARRB1_-_75062939.23-P1P2	predicted	predicted	GCAGGGGCGTGGAACCGCGC	GCGCGCCGCCCAGCGAGGCA	ARRB1_-_75062870.23-P1P2|ARRB1_-_75062939.23-P1P2
ARRB2	P1P2	ARRB2_-_4613775.23-P1P2	ARRB2_-_4613768.23-P1P2	predicted	predicted	GAAGGAGCGCGAAGGGCTGG	GGGCTGGGAAGGAGCGCGAA	ARRB2_-_4613775.23-P1P2|ARRB2_-_4613768.23-P1P2
ARRDC1	P1P2	ARRDC1_-_140499976.23-P1P2	ARRDC1_-_140499944.23-P1P2	predicted	predicted	GCCTCCGAGCGGCAGTCCGC	GCGGATGGGGCGGGGAATAG	ARRDC1_-_140499976.23-P1P2|ARRDC1_-_140499944.23-P1P2
ARRDC2	P1	ARRDC2_-_18118813.23-P1	ARRDC2_+_18118737.23-P1	predicted	predicted	GCGGGGTCCGCGAGGGAAGG	GGGTCTCTCGCGGACCCCGG	ARRDC2_-_18118813.23-P1|ARRDC2_+_18118737.23-P1
ARRDC2	P2	ARRDC2_-_18111754.23-P2	ARRDC2_-_18111926.23-P2	predicted	predicted	GAGGGGCGAATGAGACCATA	GCGGCCCGCGTGCGTCACGG	ARRDC2_-_18111754.23-P2|ARRDC2_-_18111926.23-P2
ARRDC4	P1P2	ARRDC4_+_98503758.23-P1P2	ARRDC4_+_98503788.23-P1P2	predicted	predicted	GGGAAGGCCGTGCGTGATCA	GCATTGGCGCTCCCACGCGT	ARRDC4_+_98503758.23-P1P2|ARRDC4_+_98503788.23-P1P2
ARRDC5	P1P2	ARRDC5_-_4902979.23-P1P2	ARRDC5_-_4903001.23-P1P2	predicted	predicted	GGGGACCCCAGTGGCCAGGA	GGAGGCAAAACTGTTGTTTA	ARRDC5_-_4902979.23-P1P2|ARRDC5_-_4903001.23-P1P2
ARSA	P1P2	ARSA_-_51066783.23-P1P2	ARSA_-_51066691.23-P1P2	predicted	predicted	GGCCCTGGCTGAGGCGTCCC	GGCTGCGCGTGCTCGCTCCG	ARSA_-_51066783.23-P1P2|ARSA_-_51066691.23-P1P2
ARSB	P1P2	ARSB_+_78281180.23-P1P2	ARSB_-_78281197.23-P1P2	predicted	predicted	GCAAGCCCACGGCCCGCTGG	GGGCACCCCCAGCGGGCCGT	ARSB_+_78281180.23-P1P2|ARSB_-_78281197.23-P1P2
ARSD	P1P2	ARSD_-_2847490.23-P1P2	ARSD_-_2847500.23-P1P2	predicted	predicted	GGGGACCTGCGCGTGGAAAC	GCGTGGAAACAGGTTTTCCC	ARSD_-_2847490.23-P1P2|ARSD_-_2847500.23-P1P2
ARSE	P1P2	ARSE_+_2882683.23-P1P2	ARSE_-_2882359.23-P1P2	predicted	predicted	GGCACCCTGTGTAACAGCAC	GGGCAGAGAGCACTTGCACA	ARSE_+_2882683.23-P1P2|ARSE_-_2882359.23-P1P2
ARSF	P1P2	ARSF_-_2984647.23-P1P2	ARSF_+_2984772.23-P1P2	predicted	predicted	GAAGAAAGGCTGTAGGTATT	GACCTCTCTCTCCCATGGGA	ARSF_-_2984647.23-P1P2|ARSF_+_2984772.23-P1P2
ARSG	ENST00000448504.2	ARSG_-_66255225.23-ENST00000448504.2	ARSG_+_66255018.23-ENST00000448504.2	predicted	predicted	GGGCCGCGTTGCTCCCTCTT	GACTAACTCCACAGGTGCCC	ARSG_-_66255225.23-ENST00000448504.2|ARSG_+_66255018.23-ENST00000448504.2
ARSH	ENST00000381130.2	ARSH_-_2924461.23-ENST00000381130.2	ARSH_+_2924398.23-ENST00000381130.2	predicted	predicted	GTTTCTGAGTAAGACAACAC	GAAAAACTAATGTTCTATAC	ARSH_-_2924461.23-ENST00000381130.2|ARSH_+_2924398.23-ENST00000381130.2
ARSI	P1P2	ARSI_-_149682608.23-P1P2	ARSI_-_149682658.23-P1P2	predicted	predicted	GCCCGCCCCTGACCGGGATG	GCGATGGAACAGCTCCAGAA	ARSI_-_149682608.23-P1P2|ARSI_-_149682658.23-P1P2
ARSJ	P1P2	ARSJ_-_114901142.23-P1P2	ARSJ_+_114901075.23-P1P2	predicted	predicted	GCGGCGGCGCGAATGGGGAA	GGGCAGGAGGCGACACTCTT	ARSJ_-_114901142.23-P1P2|ARSJ_+_114901075.23-P1P2
ARSK	P1P2	ARSK_+_94890699.23-P1P2	ARSK_-_94890673.23-P1P2	predicted	predicted	GAGTCACGTGAATGAGTCCT	GTCCTCTTCTACAAACGCCG	ARSK_+_94890699.23-P1P2|ARSK_-_94890673.23-P1P2
ART1	P1P2	ART1_-_3666218.23-P1P2	ART1_+_3666240.23-P1P2	predicted	predicted	GACACTGGGCAGGTCAGACT	GTATTTCTGGATGTCTCCTC	ART1_-_3666218.23-P1P2|ART1_+_3666240.23-P1P2
ART3	P1	ART3_-_76995682.23-P1	ART3_+_76995645.23-P1	predicted	predicted	GCAGAACTGAATGTGCTGTG	GGTTCTGAGCCCACAGTTCT	ART3_-_76995682.23-P1|ART3_+_76995645.23-P1
ART3	P2	ART3_-_76932202.23-P2	ART3_+_76932126.23-P2	predicted	predicted	GagcgcacaCGCATGAGGGA	GcTCAGACGGGGAGCGTCGC	ART3_-_76932202.23-P2|ART3_+_76932126.23-P2
ART4	P1P2	ART4_-_14996547.23-P1P2	ART4_-_14996537.23-P1P2	predicted	predicted	GCGCCACCCTGGGTGTCTAT	GGCTGGGAACGCGCCACCCT	ART4_-_14996547.23-P1P2|ART4_-_14996537.23-P1P2
ART5	P1P2	ART5_-_3663419.23-P1P2	ART5_+_3663402.23-P1P2	predicted	predicted	GAGGACCCACTTGAAGGCTG	GGCTTCCGCAGCCTTCAAGT	ART5_-_3663419.23-P1P2|ART5_+_3663402.23-P1P2
ARTN	P1	ARTN_-_44399303.23-P1	ARTN_+_44399233.23-P1	predicted	predicted	GGGACCTAGCCAAGCTAGGG	GGGGAGGGGCCCCTCGGATA	ARTN_-_44399303.23-P1|ARTN_+_44399233.23-P1
ARTN	P2	ARTN_-_44401458.23-P2	ARTN_-_44401490.23-P2	predicted	predicted	GTGACTGGTGAGGGAGAGCA	GGCAGCGGTTAGGTGTGGGA	ARTN_-_44401458.23-P2|ARTN_-_44401490.23-P2
ARV1	P1P2	ARV1_-_231114699.23-P1P2	ARV1_-_231114718.23-P1P2	predicted	predicted	GGGGAGAAGCATTGTGTGCT	GGGGAATGGTAGTCCCAGCT	ARV1_-_231114699.23-P1P2|ARV1_-_231114718.23-P1P2
ARVCF	P1	ARVCF_+_19974918.23-P1	ARVCF_+_19974847.23-P1	predicted	predicted	GTCCAGGCCGGCAGTGGGTG	GCCCGCCCCCTGTCTCTGGG	ARVCF_+_19974918.23-P1|ARVCF_+_19974847.23-P1
ARVCF	P2	ARVCF_+_20004519.23-P2	ARVCF_+_20004668.23-P2	predicted	predicted	GGGCCGCGGCCCCTCCGCGA	GGCTACGCGGCCAGAGTCCG	ARVCF_+_20004519.23-P2|ARVCF_+_20004668.23-P2
ARX	P1	ARX_-_25034145.23-P1	ARX_-_25034224.23-P1	predicted	predicted	GCTGAGAGGCGCCCTCTGAT	GATTCCAGAGGGGCAGGCGG	ARX_-_25034145.23-P1|ARX_-_25034224.23-P1
ARX	P2	ARX_+_25031306.23-P2	ARX_+_25031446.23-P2	predicted	predicted	GGAGCCCCGGCGCTGTCCTG	GCGGCTGCGGGTGGTGGCAC	ARX_+_25031306.23-P2|ARX_+_25031446.23-P2
AS3MT	P1P2	AS3MT_-_104629078.23-P1P2	AS3MT_-_104629186.23-P1P2	predicted	predicted	GTCGCAGTGGAGCGAACAAG	GCGAGGGGCTAGAGCGGGAT	AS3MT_-_104629078.23-P1P2|AS3MT_-_104629186.23-P1P2
ASAH1	P1P2	ASAH1_-_17941933.23-P1P2	ASAH1_-_17941920.23-P1P2	predicted	predicted	GCACCCGTGGCGCCTCGATG	GGGGCCGGGAGCTTCACCCG	ASAH1_-_17941933.23-P1P2|ASAH1_-_17941920.23-P1P2
ASAH2	ENST00000395526.4	ASAH2_+_52008544.23-ENST00000395526.4	ASAH2_+_52008523.23-ENST00000395526.4	predicted	predicted	Ggattggtcttgtctgccat	Ggcttggtctatggaatgag	ASAH2_+_52008544.23-ENST00000395526.4|ASAH2_+_52008523.23-ENST00000395526.4
ASAH2B	P1P2	ASAH2B_-_52499456.23-P1P2	ASAH2B_+_52499426.23-P1P2	predicted	predicted	GTCGCGGAGGACTAAGGCGA	GTAGTCCTCCGCGAAGGCCA	ASAH2B_-_52499456.23-P1P2|ASAH2B_+_52499426.23-P1P2
ASAP1	P1P2	ASAP1_-_131456112.23-P1P2	ASAP1_+_131456027.23-P1P2	predicted	predicted	GGGCCCGCCGGCAGCCACGA	GGGGCCGGGAATGCTTAGTC	ASAP1_-_131456112.23-P1P2|ASAP1_+_131456027.23-P1P2
ASAP2	P1P2	ASAP2_-_9346756.23-P1P2	ASAP2_+_9346440.23-P1P2	predicted	predicted	GGCGGCCAGGAACGGCTcgg	GACCCTGCGGGGACCACAGC	ASAP2_-_9346756.23-P1P2|ASAP2_+_9346440.23-P1P2
ASAP3	P1P2	ASAP3_+_23810756.23-P1P2	ASAP3_+_23810824.23-P1P2	predicted	predicted	GAGAGCGGCTGGAGGGTcgg	Gggagcctggaccttggcgg	ASAP3_+_23810756.23-P1P2|ASAP3_+_23810824.23-P1P2
ASB1	P1P2	ASB1_+_239335503.23-P1P2	ASB1_-_239335536.23-P1P2	predicted	predicted	GTCGCTGTCTAGCAGGGCGC	GTAGACAGCGAGGCCGGAAG	ASB1_+_239335503.23-P1P2|ASB1_-_239335536.23-P1P2
ASB10	P1P2	ASB10_+_150885032.23-P1P2	ASB10_-_150885051.23-P1P2	predicted	predicted	GAGCCCTGGGGTGAAGCTCA	GAACCCTGAGCTTCACCCCA	ASB10_+_150885032.23-P1P2|ASB10_-_150885051.23-P1P2
ASB11	P1	ASB11_+_15333929.23-P1	ASB11_+_15333828.23-P1	predicted	predicted	GTAGAACTATTGGATGTTTC	GCTACAGAGATCTCGGTAAC	ASB11_+_15333929.23-P1|ASB11_+_15333828.23-P1
ASB11	P2	ASB11_-_15332864.23-P2	ASB11_-_15332799.23-P2	predicted	predicted	GGACAATCCCAGGAGTGACA	GCAAACACTAAAAATACACG	ASB11_-_15332864.23-P2|ASB11_-_15332799.23-P2
ASB12	ENST00000362002.2	ASB12_+_63450698.23-ENST00000362002.2	ASB12_-_63450684.23-ENST00000362002.2	predicted	predicted	GGGGAGGGATATAGGAGGAT	GCAGGTGCCTGGTGAGGCTA	ASB12_+_63450698.23-ENST00000362002.2|ASB12_-_63450684.23-ENST00000362002.2
ASB12	ENST00000396130.2	ASB12_-_63445733.23-ENST00000396130.2	ASB12_+_63445601.23-ENST00000396130.2	predicted	predicted	GACACTGCCAAAACAGGTCA	GTCAAGGAGCGTGCATGGTC	ASB12_-_63445733.23-ENST00000396130.2|ASB12_+_63445601.23-ENST00000396130.2
ASB13	P1P2	ASB13_+_5708646.23-P1P2	ASB13_-_5708685.23-P1P2	predicted	predicted	GGGGAACCTCGCCAAGGCGG	GTCCCGGAGGCGCTGTCCCT	ASB13_+_5708646.23-P1P2|ASB13_-_5708685.23-P1P2
ASB14	P1P2	ASB14_+_57326758.23-P1P2	ASB14_+_57327017.23-P1P2	predicted	predicted	GTAATGGAATGGTCACTACA	GGGGTCAGAGCAAAATGTTT	ASB14_+_57326758.23-P1P2|ASB14_+_57327017.23-P1P2
ASB15	P1P2	ASB15_+_123241708.23-P1P2	ASB15_-_123241746.23-P1P2	predicted	predicted	GAGATTATCTCTGTCCTGAT	GAATCTTATTATACCTCTGT	ASB15_+_123241708.23-P1P2|ASB15_-_123241746.23-P1P2
ASB16	P1P2	ASB16_-_42247861.23-P1P2	ASB16_-_42247869.23-P1P2	predicted	predicted	GAAGGTGGATGCAGATGCTG	GTGCAGATGCTGGGGTTCGG	ASB16_-_42247861.23-P1P2|ASB16_-_42247869.23-P1P2
ASB17	P1P2	ASB17_-_76398194.23-P1P2	ASB17_-_76398212.23-P1P2	predicted	predicted	GGTCACCAGCATAGGTCAGA	GAGGGGATATTGTATGTAAC	ASB17_-_76398194.23-P1P2|ASB17_-_76398212.23-P1P2
ASB18	P1P2	ASB18_+_237173096.23-P1P2	ASB18_+_237173116.23-P1P2	predicted	predicted	GGGGACTGTAAGAGGAGCCA	GCTGGCAGGTGGCCCTCCGC	ASB18_+_237173096.23-P1P2|ASB18_+_237173116.23-P1P2
ASB2	P1P2	ASB2_-_94443278.23-P1P2	ASB2_-_94443230.23-P1P2	predicted	predicted	Gagttgggagacaaagagtg	GTGCAGTGGGTCAGAGACAg	ASB2_-_94443278.23-P1P2|ASB2_-_94443230.23-P1P2
ASB3	P1P2	ASB3_+_54087407.23-P1P2	ASB3_-_54087263.23-P1P2	predicted	predicted	GAGGCCCGCAAAGACCTCCC	GCCGCTGCCCGCCTCACGAG	ASB3_+_54087407.23-P1P2|ASB3_-_54087263.23-P1P2
ASB4	P1P2	ASB4_+_95115192.23-P1P2	ASB4_-_95115027.23-P1P2	predicted	predicted	GTGGAGAGTCCACAAACTGT	GCATGCCTGGAAATGTATCA	ASB4_+_95115192.23-P1P2|ASB4_-_95115027.23-P1P2
ASB5	P1P2	ASB5_-_177190738.23-P1P2	ASB5_+_177190406.23-P1P2	predicted	predicted	GTAAATCAGTACACAGTCCA	GAGTTTGCGAAGAACTTTTA	ASB5_-_177190738.23-P1P2|ASB5_+_177190406.23-P1P2
ASB6	P1P2	ASB6_-_132404591.23-P1P2	ASB6_+_132404613.23-P1P2	predicted	predicted	GTGGGCGGCCCCAGCGGAGT	GCCCGCCTGAGTCTCGGATC	ASB6_-_132404591.23-P1P2|ASB6_+_132404613.23-P1P2
ASB7	P1P2	ASB7_+_101142572.23-P1P2	ASB7_-_101142536.23-P1P2	predicted	predicted	GAAGGGAGGCGTGCCGAACG	GCCACCACGGGGAAGCTGTA	ASB7_+_101142572.23-P1P2|ASB7_-_101142536.23-P1P2
ASB8	P1P2	ASB8_-_48551441.23-P1P2	ASB8_+_48551392.23-P1P2	predicted	predicted	GCCCTCCAGAGGCCTAGTTA	GCTGCTGCACAAGTCTGCGC	ASB8_-_48551441.23-P1P2|ASB8_+_48551392.23-P1P2
ASB9	P1P2	ASB9_+_15288283.23-P1P2	ASB9_+_15288449.23-P1P2	predicted	predicted	GCAGCAACTTCGCAGACTTA	GTAACAAACGGATCTCAGCA	ASB9_+_15288283.23-P1P2|ASB9_+_15288449.23-P1P2
ASCC1	P1P2	ASCC1_-_73975918.23-P1P2	ASCC1_-_73976276.23-P1P2	predicted	predicted	GTAAGAGGCCGAGGGGTCGA	GTACAGCTGCGGCATCTATT	ASCC1_-_73975918.23-P1P2|ASCC1_-_73976276.23-P1P2
ASCC2	P1P2	ASCC2_+_30234373.23-P1P2	ASCC2_+_30234370.23-P1P2	predicted	predicted	GGCTACAGACGCCGAGTGTG	GACAGACGCCGAGTGTGGGG	ASCC2_+_30234373.23-P1P2|ASCC2_+_30234370.23-P1P2
ASCC3	P1P2	ASCC3_+_101329335.23-P1P2	ASCC3_-_101329350.23-P1P2	predicted	predicted	GTCTGCTCCTCCGAACCCAG	GTCTAGTCCGCTGGGTTCGG	ASCC3_+_101329335.23-P1P2|ASCC3_-_101329350.23-P1P2
ASCL1	P1P2	ASCL1_-_103351271.23-P1P2	ASCL1_-_103351302.23-P1P2	predicted	predicted	Gcgggagaaaggaacgggag	Ggaggaggagggggagttta	ASCL1_-_103351271.23-P1P2|ASCL1_-_103351302.23-P1P2
ASCL2	P1P2	ASCL2_+_2292344.23-P1P2	ASCL2_+_2292490.23-P1P2	predicted	predicted	GCAAACGGGTGGCCCACGAT	GGCGCCCAGCCCAGTCGCGG	ASCL2_+_2292344.23-P1P2|ASCL2_+_2292490.23-P1P2
ASCL3	P1P2	ASCL3_-_8964732.23-P1P2	ASCL3_-_8964715.23-P1P2	predicted	predicted	GAAAGGCGTGCTTACAAAAC	GATAACCATACTAAATAGAA	ASCL3_-_8964732.23-P1P2|ASCL3_-_8964715.23-P1P2
ASCL4	ENST00000342331.4	ASCL4_-_108168018.23-ENST00000342331.4	ASCL4_-_108168015.23-ENST00000342331.4	predicted	predicted	GTGGGTGAGATTAGAAGAGG	GTCCTGGGTGAGATTAGAAG	ASCL4_-_108168018.23-ENST00000342331.4|ASCL4_-_108168015.23-ENST00000342331.4
ASCL5	P1P2	ASCL5_-_201096538.23-P1P2	ASCL5_-_201096488.23-P1P2	predicted	predicted	GGGCAAGTGACATGCAGCTC	GAAGGAGAGAGGGCCACTCC	ASCL5_-_201096538.23-P1P2|ASCL5_-_201096488.23-P1P2
ASF1A	P1P2	ASF1A_-_119215283.23-P1P2	ASF1A_+_119215271.23-P1P2	predicted	predicted	GGAGCGGGAGCCCATCTTGC	GCCTCGGCAGCCAGCAAGAT	ASF1A_-_119215283.23-P1P2|ASF1A_+_119215271.23-P1P2
ASF1B	P1P2	ASF1B_-_14247534.23-P1P2	ASF1B_-_14247571.23-P1P2	predicted	predicted	GGGCGCGCGCCCAGACTCCT	GTCCCTCTCCGCAGCGTGTG	ASF1B_-_14247534.23-P1P2|ASF1B_-_14247571.23-P1P2
ASGR1	P1P2	ASGR1_+_7082850.23-P1P2	ASGR1_-_7082780.23-P1P2	predicted	predicted	GCACGGAAGAGTGAGGTGAC	GTGGAACTTAGGGGAGTGTG	ASGR1_+_7082850.23-P1P2|ASGR1_-_7082780.23-P1P2
ASGR2	P1P2	ASGR2_+_7018344.23-P1P2	ASGR2_-_7018135.23-P1P2	predicted	predicted	GTCggaggcaggaagtgaga	GACCTCCTGGCCTGGGACTT	ASGR2_+_7018344.23-P1P2|ASGR2_-_7018135.23-P1P2
ASH1L	P1P2	ASH1L_+_155532701.23-P1P2	ASH1L_+_155532709.23-P1P2	predicted	predicted	GCGCACGCGCGAGGGGTGGA	GGTGGGAGGCGCACGCGCGA	ASH1L_+_155532701.23-P1P2|ASH1L_+_155532709.23-P1P2
ASH2L	P1P2	ASH2L_-_37963062.23-P1P2	ASH2L_-_37963157.23-P1P2	predicted	predicted	GCTCGCGAGAAGTCCAGGGG	GTGCAACAGGGGCAGAAGAG	ASH2L_-_37963062.23-P1P2|ASH2L_-_37963157.23-P1P2
ASIC1	P1P2	ASIC1_+_50451281.23-P1P2	ASIC1_-_50451114.23-P1P2	predicted	predicted	GGATCCGGGAGCGGGACCCA	GGCGGGGAGAGGGACGCTAG	ASIC1_+_50451281.23-P1P2|ASIC1_-_50451114.23-P1P2
ASIC2	ENST00000359872.6	ASIC2_-_32484490.23-ENST00000359872.6	ASIC2_-_32484628.23-ENST00000359872.6	predicted	predicted	GCTAGTGGGGGCTTCTTCGA	GCCAGCCTGGGATCTCCAGA	ASIC2_-_32484490.23-ENST00000359872.6|ASIC2_-_32484628.23-ENST00000359872.6
ASIC3	P1P2	ASIC3_+_150748145.23-P1P2	ASIC3_+_150748176.23-P1P2	predicted	predicted	GCACAGTTCTTGTACTGCTG	GGGAGGCTCGCCCTTACCTA	ASIC3_+_150748145.23-P1P2|ASIC3_+_150748176.23-P1P2
ASIC4	P1P2	ASIC4_-_220378903.23-P1P2	ASIC4_-_220378909.23-P1P2	predicted	predicted	GGATCTGGGGACCCAGTGAG	GGGGACCCAGTGAGCGGCTA	ASIC4_-_220378903.23-P1P2|ASIC4_-_220378909.23-P1P2
ASIC5	P1P2	ASIC5_+_156787727.23-P1P2	ASIC5_+_156787600.23-P1P2	predicted	predicted	GACGTTCCCGGGTGAGTCAT	GTCACTCATGAAATCACTCT	ASIC5_+_156787727.23-P1P2|ASIC5_+_156787600.23-P1P2
ASIP	P1P2	ASIP_+_32781777.23-P1P2	ASIP_-_32781974.23-P1P2	predicted	predicted	GCATGGGAAGAGGTAACCTC	GGCTCCTGACTCCAAGCTGT	ASIP_+_32781777.23-P1P2|ASIP_-_32781974.23-P1P2
ASL	P1P2	ASL_-_65540697.23-P1P2	ASL_-_65540733.23-P1P2	predicted	predicted	GCACGGCCAGGATTGGAGGA	GCCGCCGGGCGGCCTCCTAT	ASL_-_65540697.23-P1P2|ASL_-_65540733.23-P1P2
ASMT	P1P2	ASMT_-_1733835.23-P1P2	ASMT_-_1733832.23-P1P2	predicted	predicted	GGATGAGTCAAGGGCTCGGG	GGCTGATGAGTCAAGGGCTC	ASMT_-_1733835.23-P1P2|ASMT_-_1733832.23-P1P2
ASMTL	P1P2	ASMTL_+_1572001.23-P1P2	ASMTL_+_1571921.23-P1P2	predicted	predicted	GTGGTCTCAGGGGAGATCAA	GCTGACGGAGTGTTCAATGG	ASMTL_+_1572001.23-P1P2|ASMTL_+_1571921.23-P1P2
ASNA1	P1P2	ASNA1_-_12848113.23-P1P2	ASNA1_+_12848079.23-P1P2	predicted	predicted	GGATGTGTTCATTAGGTAGG	GGAACACATCGGTACGGTCT	ASNA1_-_12848113.23-P1P2|ASNA1_+_12848079.23-P1P2
ASNS	P1P2	ASNS_-_97501860.23-P1P2	ASNS_-_97501872.23-P1P2	predicted	predicted	GGGGCGGAGCAGGACTAAGT	GACTAAGTGGGGCGGCGGAA	ASNS_-_97501860.23-P1P2|ASNS_-_97501872.23-P1P2
ASNSD1	P1P2	ASNSD1_+_190526025.23-P1P2	ASNSD1_-_190526187.23-P1P2	predicted	predicted	GAGGGAGCGAGTAAACAGTC	GTGGAAGCGCGCATGCGCTG	ASNSD1_+_190526025.23-P1P2|ASNSD1_-_190526187.23-P1P2
ASPA	P1P2	ASPA_-_3379180.23-P1P2	ASPA_-_3379107.23-P1P2	predicted	predicted	GTAGATCTACTGACCATCTG	GCTGGATGACATCCTAGCTG	ASPA_-_3379180.23-P1P2|ASPA_-_3379107.23-P1P2
ASPDH	P1P2	ASPDH_-_51018059.23-P1P2	ASPDH_-_51018407.23-P1P2	predicted	predicted	GAGAGCGTGAACGGGAGCAT	GCCACTACGAGGGGAGAAGG	ASPDH_-_51018059.23-P1P2|ASPDH_-_51018407.23-P1P2
ASPG	P1	ASPG_+_104551869.23-P1	ASPG_+_104551938.23-P1	predicted	predicted	GGGGTCCCGGGGACTGTCCA	Ggagtggagtctgcccggga	ASPG_+_104551869.23-P1|ASPG_+_104551938.23-P1
ASPG	P2	ASPG_+_104570893.23-P2	ASPG_-_104571105.23-P2	predicted	predicted	GGCCCCCAGCCCATGAGGGG	GTCGGGCTGTGGGCAACCCT	ASPG_+_104570893.23-P2|ASPG_-_104571105.23-P2
ASPH	P1P2	ASPH_-_62627475.23-P1P2	ASPH_-_62627260.23-P1P2	predicted	predicted	GACAGGGCGCGGTGCGGAAT	GGCCTGGGACCCAATCGCAA	ASPH_-_62627475.23-P1P2|ASPH_-_62627260.23-P1P2
ASPHD1	P1P2	ASPHD1_+_29911668.23-P1P2	ASPHD1_-_29911542.23-P1P2	predicted	predicted	GAGAAGGGGCGGGTCGTATC	GTAGGGCCAGCGGGAGTCac	ASPHD1_+_29911668.23-P1P2|ASPHD1_-_29911542.23-P1P2
ASPHD2	P1P2	ASPHD2_+_26825021.23-P1P2	ASPHD2_-_26825088.23-P1P2	predicted	predicted	GCCAGCCCGAGGTTGCGCGC	GCTGCCAGGACCCTCCGGAG	ASPHD2_+_26825021.23-P1P2|ASPHD2_-_26825088.23-P1P2
ASPM	P1P2	ASPM_-_197115947.23-P1P2	ASPM_-_197115857.23-P1P2	predicted	predicted	GCGCCAATCGCTATCTGCGG	GGCACCGCCCTCCTCGTCAC	ASPM_-_197115947.23-P1P2|ASPM_-_197115857.23-P1P2
ASPN	P1P2	ASPN_+_95244934.23-P1P2	ASPN_-_95244882.23-P1P2	predicted	predicted	GACTCCGACTGCACTTTCAA	GCTAAACTCTAGACGTCTAC	ASPN_+_95244934.23-P1P2|ASPN_-_95244882.23-P1P2
ASPRV1	ENST00000320256.4	ASPRV1_+_70189567.23-ENST00000320256.4	ASPRV1_+_70189478.23-ENST00000320256.4	predicted	predicted	GAATGACCAGCTTGGGGAGT	GAGGGTGGAGACAATGCTCA	ASPRV1_+_70189567.23-ENST00000320256.4|ASPRV1_+_70189478.23-ENST00000320256.4
ASPSCR1	P1P2	ASPSCR1_-_79935321.23-P1P2	ASPSCR1_-_79935315.23-P1P2	predicted	predicted	GCCGCGCTTCCCGGAGGCAG	GTCCAAGCCGCGCTTCCCGG	ASPSCR1_-_79935321.23-P1P2|ASPSCR1_-_79935315.23-P1P2
ASRGL1	P1P2	ASRGL1_-_62104872.23-P1P2	ASRGL1_+_62104755.23-P1P2	predicted	predicted	GCCGGCCTTCGGGGCTTTAT	GGAACCTCCTGCTCCTGACC	ASRGL1_-_62104872.23-P1P2|ASRGL1_+_62104755.23-P1P2
ASS1	P1P2	ASS1_-_133320149.23-P1P2	ASS1_-_133320112.23-P1P2	predicted	predicted	GGCCCAGGCCCGGACCTGGT	GccgccggcgcgccccTGGG	ASS1_-_133320149.23-P1P2|ASS1_-_133320112.23-P1P2
ASTE1	P1P2	ASTE1_+_130745682.23-P1P2	ASTE1_+_130745773.23-P1P2	predicted	predicted	GCGGGGCATACTGGGAAGTC	GCGGGCAGGCCTCAAACTAG	ASTE1_+_130745682.23-P1P2|ASTE1_+_130745773.23-P1P2
ASTL	ENST00000342380.2	ASTL_+_96804692.23-ENST00000342380.2	ASTL_+_96804498.23-ENST00000342380.2	predicted	predicted	GCACAGGCCGGGGTAGGAAA	GGGGCTGGGGTGGGAACCAC	ASTL_+_96804692.23-ENST00000342380.2|ASTL_+_96804498.23-ENST00000342380.2
ASTN1	P1P2	ASTN1_+_177133999.23-P1P2	ASTN1_-_177134041.23-P1P2	predicted	predicted	GCCGGGAAACAAAGAATCCG	GGAGCTGCTTATCTggagaa	ASTN1_+_177133999.23-P1P2|ASTN1_-_177134041.23-P1P2
ASTN2	P1P2	ASTN2_+_120177433.23-P1P2	ASTN2_+_120177535.23-P1P2	predicted	predicted	GGGGAGCCGGAGATCGGGGA	GAATGCTGTGAGGGCGGAAT	ASTN2_+_120177433.23-P1P2|ASTN2_+_120177535.23-P1P2
ASUN	P1P2	ASUN_+_27091076.23-P1P2	ASUN_-_27091047.23-P1P2	predicted	predicted	GAGCGGGTGGAAAATCTCGA	GTCGCCGAACAGGAAGAGGG	ASUN_+_27091076.23-P1P2|ASUN_-_27091047.23-P1P2
ASXL1	P1P2	ASXL1_+_30945889.23-P1P2	ASXL1_-_30945956.23-P1P2	predicted	predicted	GACGGGTCGCTGTTCGGGGA	GCTAGGCGGAGGACGCGAGA	ASXL1_+_30945889.23-P1P2|ASXL1_-_30945956.23-P1P2
ASXL2	P1P2	ASXL2_+_26101372.23-P1P2	ASXL2_+_26101501.23-P1P2	predicted	predicted	GCGGCTGCGTACAGTAGTGA	GCGCGCATGCTCCTGCGGAG	ASXL2_+_26101372.23-P1P2|ASXL2_+_26101501.23-P1P2
ASXL3	P1P2	ASXL3_-_31158223.23-P1P2	ASXL3_-_31158050.23-P1P2	predicted	predicted	GGGGCCGAGCGGAGCATCCC	GAGGGAGAGGGGTCTCGCGA	ASXL3_-_31158223.23-P1P2|ASXL3_-_31158050.23-P1P2
ASZ1	P1P2	ASZ1_-_117067704.23-P1P2	ASZ1_+_117067687.23-P1P2	predicted	predicted	GCCGTCCCTCCCTAACCTTG	GGAAGCCTCAAGGTTAGGGA	ASZ1_-_117067704.23-P1P2|ASZ1_+_117067687.23-P1P2
ATAD1	P1P2	ATAD1_-_89578082.23-P1P2	ATAD1_+_89578047.23-P1P2	predicted	predicted	GGCGGAGGGGGCGTGCTCCC	GCCCTCCGCGCCGGCGACCG	ATAD1_-_89578082.23-P1P2|ATAD1_+_89578047.23-P1P2
ATAD2	P1P2	ATAD2_-_124408842.23-P1P2	ATAD2_-_124408834.23-P1P2	predicted	predicted	GCCAACGTGGAGAGGAACAC	GAGGCCGGGCCAACGTGGAG	ATAD2_-_124408842.23-P1P2|ATAD2_-_124408834.23-P1P2
ATAD2B	P1P2	ATAD2B_-_24150133.23-P1P2	ATAD2B_-_24150113.23-P1P2	predicted	predicted	GGGCCGGGGAGCGACGCTCT	GGCGCGGCGTCAGCGCTCGG	ATAD2B_-_24150133.23-P1P2|ATAD2B_-_24150113.23-P1P2
ATAD3A	P1P2	ATAD3A_+_1447372.23-P1P2	ATAD3A_+_1447294.23-P1P2	predicted	predicted	GGCGGCGAAGCATCTGGCTA	GCCCCGCGCCGCATCCGCGT	ATAD3A_+_1447372.23-P1P2|ATAD3A_+_1447294.23-P1P2
ATAD3B	P1	ATAD3B_+_1406940.23-P1	ATAD3B_+_1406964.23-P1	predicted	predicted	GCCGCACCGGGACAAAACTC	GTGGTGAAGCGTCTGGGTAC	ATAD3B_+_1406940.23-P1|ATAD3B_+_1406964.23-P1
ATAD3B	P2	ATAD3B_+_1412999.23-P2	ATAD3B_-_1412834.23-P2	predicted	predicted	GGAAGAAGACCCCCTCCCTC	GAGGGCCAGGGGCGTGTACA	ATAD3B_+_1412999.23-P2|ATAD3B_-_1412834.23-P2
ATAD3C	P1P2	ATAD3C_-_1397730.23-P1P2	ATAD3C_-_1397890.23-P1P2	predicted	predicted	GTAACGGCCATGCGCCCTGT	GTCAAGGGGGCATCTGGCAT	ATAD3C_-_1397730.23-P1P2|ATAD3C_-_1397890.23-P1P2
ATAD5	P1P2	ATAD5_+_29158897.23-P1P2	ATAD5_-_29158915.23-P1P2	predicted	predicted	GACTCCCTCGGCGAACCCGC	GCCTCCCGCGGGTTCGCCGA	ATAD5_+_29158897.23-P1P2|ATAD5_-_29158915.23-P1P2
ATAT1	P1P2	ATAT1_-_30594493.23-P1P2	ATAT1_-_30594614.23-P1P2	predicted	predicted	GGAAAGGAGTGGCACTGCTA	GAGGCGGTGCGGCGAGAGGA	ATAT1_-_30594493.23-P1P2|ATAT1_-_30594614.23-P1P2
ATCAY	P1P2	ATCAY_+_3880563.23-P1P2	ATCAY_-_3880574.23-P1P2	predicted	predicted	GAGAATCCGATCCTCCCCAT	GTGTCTGTCAGCCAATGGGG	ATCAY_+_3880563.23-P1P2|ATCAY_-_3880574.23-P1P2
ATE1	P1P2	ATE1_+_123687689.23-P1P2	ATE1_-_123687707.23-P1P2	predicted	predicted	GTCACCCTCACTGACGACGG	GGGGCCGCCGTCGTCAGTGA	ATE1_+_123687689.23-P1P2|ATE1_-_123687707.23-P1P2
ATF1	P1P2	ATF1_-_51157712.23-P1P2	ATF1_+_51157701.23-P1P2	predicted	predicted	GGAACCCCTAGCCACAAGTC	GTGTACGCGGTCCTGACTTG	ATF1_-_51157712.23-P1P2|ATF1_+_51157701.23-P1P2
ATF2	P1P2	ATF2_+_176032967.23-P1P2	ATF2_-_176033172.23-P1P2	predicted	predicted	GGGGAGGGGCGCCAGAAGGA	GGGGCGGGAAGCAGTTCTGG	ATF2_+_176032967.23-P1P2|ATF2_-_176033172.23-P1P2
ATF3	P1P2	ATF3_+_212781926.23-P1P2	ATF3_+_212781893.23-P1P2	predicted	predicted	GCCAAGGCGGGGCCGAAGGC	GGGCACTGGTGATGCAAGTT	ATF3_+_212781926.23-P1P2|ATF3_+_212781893.23-P1P2
ATF4	P1P2	ATF4_-_39916446.23-P1P2	ATF4_-_39916280.23-P1P2	predicted	predicted	GTAAACGGTTGGGGCGTCAA	GTGCGCTGACACCGGAAGCG	ATF4_-_39916446.23-P1P2|ATF4_-_39916280.23-P1P2
ATF5	P1P2	ATF5_-_50432120.23-P1P2	ATF5_-_50432235.23-P1P2	predicted	predicted	GGGTCTGCGGGAAGAGAATG	GACCCCGGAGCCACAAGGAG	ATF5_-_50432120.23-P1P2|ATF5_-_50432235.23-P1P2
ATF6	P1P2	ATF6_+_161735901.23-P1P2	ATF6_+_161736005.23-P1P2	predicted	predicted	GTGTTTTATGGGGAAGGCGG	GCGAGGGATTTGTACGACAC	ATF6_+_161735901.23-P1P2|ATF6_+_161736005.23-P1P2
ATF6B	P1P2	ATF6B_-_32096139.23-P1P2	ATF6B_-_32096152.23-P1P2	predicted	predicted	GGCACGTGAATCAACAGATG	GCAGATGCGGATGACTGTGT	ATF6B_-_32096139.23-P1P2|ATF6B_-_32096152.23-P1P2
ATF7	P1P2	ATF7_-_54020231.23-P1P2	ATF7_-_54020295.23-P1P2	predicted	predicted	GGGAAGGGCGAGATCCGTGG	GAAGGGGCCGGGCTTACTGT	ATF7_-_54020231.23-P1P2|ATF7_-_54020295.23-P1P2
ATF7IP	P1	ATF7IP_+_14518543.23-P1	ATF7IP_+_14518413.23-P1	predicted	predicted	GAATATGGGCGGGGCTCCGG	GCTCCTGCGTGGAAAAGAGA	ATF7IP_+_14518543.23-P1|ATF7IP_+_14518413.23-P1
ATF7IP	P2	ATF7IP_-_14538145.23-P2	ATF7IP_-_14537944.23-P2	predicted	predicted	GCAGGCTGACAAAGTGGGAG	GCTCTGTAACTGCTAATATG	ATF7IP_-_14538145.23-P2|ATF7IP_-_14537944.23-P2
ATF7IP2	P1P2	ATF7IP2_+_10479751.23-P1P2	ATF7IP2_+_10479771.23-P1P2	predicted	predicted	GGGAAATGGAAGTAGGCTGA	GCGGGGCGAAGGGTCGCGAG	ATF7IP2_+_10479751.23-P1P2|ATF7IP2_+_10479771.23-P1P2
ATG10	P1P2	ATG10_-_81267907.23-P1P2	ATG10_-_81267678.23-P1P2	predicted	predicted	GAGGCCGCGGACCTGACTGA	GAGAGCTGCCCGCCAGGCGA	ATG10_-_81267907.23-P1P2|ATG10_-_81267678.23-P1P2
ATG12	P1P2	ATG12_+_115177511.23-P1P2	ATG12_-_115177477.23-P1P2	predicted	predicted	GTCCGAGCCAGCGGCCTAAC	GACCTCGGGAGAGGAGCGGT	ATG12_+_115177511.23-P1P2|ATG12_-_115177477.23-P1P2
ATG13	P1P2	ATG13_-_46638759.23-P1P2	ATG13_+_46638706.23-P1P2	predicted	predicted	GGGAACCGGCGACTGCACAG	GCCAACCCGGCTGGGTGGGT	ATG13_-_46638759.23-P1P2|ATG13_+_46638706.23-P1P2
ATG14	P1P2	ATG14_-_55878730.23-P1P2	ATG14_-_55878869.23-P1P2	predicted	predicted	GGGGCAACAGGTCCCGAAGC	GGATTCTGGGAAAACGGAAT	ATG14_-_55878730.23-P1P2|ATG14_-_55878869.23-P1P2
ATG16L1	P1P2	ATG16L1_+_234160177.23-P1P2	ATG16L1_-_234160173.23-P1P2	predicted	predicted	GGGAAGCGTCAGCTGCAGAG	GGGGCCCGGACGCCCCCAAG	ATG16L1_+_234160177.23-P1P2|ATG16L1_-_234160173.23-P1P2
ATG16L2	P1P2	ATG16L2_+_72525373.23-P1P2	ATG16L2_+_72525325.23-P1P2	predicted	predicted	GGGCGGCGGCGGGGAATCCC	GAGGACCGAAGGCCGACGCC	ATG16L2_+_72525373.23-P1P2|ATG16L2_+_72525325.23-P1P2
ATG2A	P1P2	ATG2A_-_64684858.23-P1P2	ATG2A_-_64684839.23-P1P2	predicted	predicted	GGGGCTCTCTGCATGATATA	GCGGGCGCGAAAAAGGGACT	ATG2A_-_64684858.23-P1P2|ATG2A_-_64684839.23-P1P2
ATG2B	P1P2	ATG2B_+_96829847.23-P1P2	ATG2B_-_96829876.23-P1P2	predicted	predicted	GGGCGACTGGAGCCGACCGG	GCGGCTCCAGTCGCCTCCGG	ATG2B_+_96829847.23-P1P2|ATG2B_-_96829876.23-P1P2
ATG3	P1P2	ATG3_-_112280840.23-P1P2	ATG3_-_112280920.23-P1P2	predicted	predicted	GGGCACGTGACGTGAGAAAG	GTGCCTGCGCAATGGGTGTC	ATG3_-_112280840.23-P1P2|ATG3_-_112280920.23-P1P2
ATG4A	P1P2	ATG4A_+_107334843.23-P1P2	ATG4A_+_107334866.23-P1P2	predicted	predicted	GAACGAGGAAGGCCGGTGAT	GCGCGCGACGGGAAAAGAAA	ATG4A_+_107334843.23-P1P2|ATG4A_+_107334866.23-P1P2
ATG4B	P1P2	ATG4B_+_242576900.23-P1P2	ATG4B_+_242576940.23-P1P2	predicted	predicted	GGGGTCGTGTCGTGGGACGA	GCGGGCCGACGCGAGCCCCG	ATG4B_+_242576900.23-P1P2|ATG4B_+_242576940.23-P1P2
ATG4C	P1P2	ATG4C_-_63249630.23-P1P2	ATG4C_+_63249686.23-P1P2	predicted	predicted	GTGCTGCATTGGTGGATTAG	GAGCGATAGCAGCGGCGTAA	ATG4C_-_63249630.23-P1P2|ATG4C_+_63249686.23-P1P2
ATG4D	P1P2	ATG4D_-_10654411.23-P1P2	ATG4D_-_10654443.23-P1P2	predicted	predicted	GCCTCCGATAAGGGCCTGAA	GTCCTGGCGGTGTGATAAGG	ATG4D_-_10654411.23-P1P2|ATG4D_-_10654443.23-P1P2
ATG5	P1P2	ATG5_-_106773638.23-P1P2	ATG5_+_106773662.23-P1P2	predicted	predicted	GAATACAACCGGCAACGCTG	GTCCGGGCGCCGAGGGTGAC	ATG5_-_106773638.23-P1P2|ATG5_+_106773662.23-P1P2
ATG7	P1P2	ATG7_+_11314000.23-P1P2	ATG7_+_11313922.23-P1P2	predicted	predicted	GCGCGTGCGCAAAGGAGCAG	GAGGAGGGCGGGGCATCAGG	ATG7_+_11314000.23-P1P2|ATG7_+_11313922.23-P1P2
ATG9A	P1P2	ATG9A_+_220094473.23-P1P2	ATG9A_+_220094518.23-P1P2	predicted	predicted	GCCCACGTAGAGCACACTAT	GGAGCAGCGAAGAGGACAAC	ATG9A_+_220094473.23-P1P2|ATG9A_+_220094518.23-P1P2
ATG9B	P1P2	ATG9B_-_150721747.23-P1P2	ATG9B_-_150721720.23-P1P2	predicted	predicted	GAGAGGGGCATCAGTTTAAG	GACCTGAGGCCAAATCCCTC	ATG9B_-_150721747.23-P1P2|ATG9B_-_150721720.23-P1P2
ATHL1	P1P2	ATHL1_-_289005.23-P1P2	ATHL1_-_288981.23-P1P2	predicted	predicted	GGCTGCCAGCGGGGACCGAG	GCCCCCGGACGCGACCCACG	ATHL1_-_289005.23-P1P2|ATHL1_-_288981.23-P1P2
ATIC	P1P2	ATIC_+_216176655.23-P1P2	ATIC_+_216176620.23-P1P2	predicted	predicted	GCCGGGGCTGAAGGGAACGG	GTCTGCCTGGCGCGCCTGGG	ATIC_+_216176655.23-P1P2|ATIC_+_216176620.23-P1P2
ATL1	P1P2	ATL1_-_51026748.23-P1P2	ATL1_-_51026778.23-P1P2	predicted	predicted	GGGGGTGGACTGAGGTAGGG	GCTGGTATCTGTGTGAACTC	ATL1_-_51026748.23-P1P2|ATL1_-_51026778.23-P1P2
ATL2	P1P2	ATL2_+_38604588.23-P1P2	ATL2_+_38604729.23-P1P2	predicted	predicted	Gggcggagcgagcgagcgat	GGAGCCTGGCCCAGCGCTAA	ATL2_+_38604588.23-P1P2|ATL2_+_38604729.23-P1P2
ATL3	P1P2	ATL3_-_63439002.23-P1P2	ATL3_-_63439023.23-P1P2	predicted	predicted	GTGGCCCAACGGACAGCCcg	Ggcgtggcgagcgcaggacg	ATL3_-_63439002.23-P1P2|ATL3_-_63439023.23-P1P2
ATM	P1P2	ATM_-_108093536.23-P1P2	ATM_-_108093545.23-P1P2	predicted	predicted	GAGGGCGGGGAGGACGACGA	GAGGACGACGAGGGCGAAGA	ATM_-_108093536.23-P1P2|ATM_-_108093545.23-P1P2
ATMIN	P1P2	ATMIN_+_81069323.23-P1P2	ATMIN_-_81069453.23-P1P2	predicted	predicted	GgcggagggcgcgccTTGGA	Gggggcggggcctacgaact	ATMIN_+_81069323.23-P1P2|ATMIN_-_81069453.23-P1P2
ATN1	P1P2	ATN1_+_7036825.23-P1P2	ATN1_-_7036737.23-P1P2	predicted	predicted	Gagcgcgaggcaagccgcga	GGGCTCCCCACATTCCGCCA	ATN1_+_7036825.23-P1P2|ATN1_-_7036737.23-P1P2
ATOH1	P1P2	ATOH1_-_94749818.23-P1P2	ATOH1_-_94749798.23-P1P2	predicted	predicted	GGGCTGAGAAGACACGCGAC	GGCCTGCCCGCGCCCTCCAT	ATOH1_-_94749818.23-P1P2|ATOH1_-_94749798.23-P1P2
ATOH7	P1P2	ATOH7_-_69991993.23-P1P2	ATOH7_+_69992080.23-P1P2	predicted	predicted	GTACCCTGGGAACTGCGGGG	GACAGCCAGGCCACTCCAGA	ATOH7_-_69991993.23-P1P2|ATOH7_+_69992080.23-P1P2
ATOH8	P1P2	ATOH8_-_85980882.23-P1P2	ATOH8_-_85980848.23-P1P2	predicted	predicted	GGTAGGGAGCCCGCGGACAA	GGGTTCTGGGCCAAGGGGAT	ATOH8_-_85980882.23-P1P2|ATOH8_-_85980848.23-P1P2
ATOX1	P1P2	ATOX1_+_151138272.23-P1P2	ATOX1_+_151138304.23-P1P2	predicted	predicted	GGGCAGGGATCAGGACTGGA	GGGCCCGGCCCGCAGAAAGG	ATOX1_+_151138272.23-P1P2|ATOX1_+_151138304.23-P1P2
ATP10A	P1P2	ATP10A_-_26108595.23-P1P2	ATP10A_-_26108632.23-P1P2	predicted	predicted	GACTGGGCCACGCCGGATAG	GCGAGCTGGAAACTTCAGAG	ATP10A_-_26108595.23-P1P2|ATP10A_-_26108632.23-P1P2
ATP10B	P1P2	ATP10B_-_160279268.23-P1P2	ATP10B_+_160279254.23-P1P2	predicted	predicted	GCCGAGTCCCAGAACAGTGA	GAACACTGCCTTCACTGTTC	ATP10B_-_160279268.23-P1P2|ATP10B_+_160279254.23-P1P2
ATP10D	P1P2	ATP10D_-_47487267.23-P1P2	ATP10D_-_47487248.23-P1P2	predicted	predicted	GCGGGGCGGTGGGCGATTGG	GGCTGCTACGTCACGGAGGG	ATP10D_-_47487267.23-P1P2|ATP10D_-_47487248.23-P1P2
ATP11A	P1P2	ATP11A_+_113344296.23-P1P2	ATP11A_-_113344387.23-P1P2	predicted	predicted	GCTCCGGGCGCGCACGTCAC	GGGGGAGGAGGAGACTCGGG	ATP11A_+_113344296.23-P1P2|ATP11A_-_113344387.23-P1P2
ATP11B	P1P2	ATP11B_+_182511172.23-P1P2	ATP11B_-_182511162.23-P1P2	predicted	predicted	GccccCGGACGTGACGAAAG	GGGGCGCGCCAGGCCCCCCT	ATP11B_+_182511172.23-P1P2|ATP11B_-_182511162.23-P1P2
ATP11C	ENST00000361648.2	ATP11C_+_138914543.23-ENST00000361648.2	ATP11C_+_138914472.23-ENST00000361648.2	predicted	predicted	GGTACTGCTTTGAGCTCTTA	GGAACTAGGCAAGCCATAAT	ATP11C_+_138914543.23-ENST00000361648.2|ATP11C_+_138914472.23-ENST00000361648.2
ATP12A	P1P2	ATP12A_+_25254562.23-P1P2	ATP12A_+_25254382.23-P1P2	predicted	predicted	GGGGACCGACAGCTAGGGGT	GGCACGCCCACGTCCTGTCC	ATP12A_+_25254562.23-P1P2|ATP12A_+_25254382.23-P1P2
ATP13A1	P1P2	ATP13A1_-_19774657.23-P1P2	ATP13A1_-_19774681.23-P1P2	predicted	predicted	GAGGCTGTGGCCGGAAGAAG	GGGGCGTCGCCATGACAGAG	ATP13A1_-_19774657.23-P1P2|ATP13A1_-_19774681.23-P1P2
ATP13A2	P1P2	ATP13A2_+_17338522.23-P1P2	ATP13A2_-_17338539.23-P1P2	predicted	predicted	GCCGCCCCCGGTGTGTGCGG	GTGCTCCTCCGCACACACCG	ATP13A2_+_17338522.23-P1P2|ATP13A2_-_17338539.23-P1P2
ATP13A3	P1P2	ATP13A3_-_194207806.23-P1P2	ATP13A3_-_194207843.23-P1P2	predicted	predicted	GGGGCGCGGGCGACGTCAGG	GGAGGGGCGGGGCGATTTAT	ATP13A3_-_194207806.23-P1P2|ATP13A3_-_194207843.23-P1P2
ATP13A4	P1P2	ATP13A4_-_193272855.23-P1P2	ATP13A4_+_193272773.23-P1P2	predicted	predicted	GAGAGCAGCTGTCTCAAAGG	GCTAGCAGAGGGCGACTCGT	ATP13A4_-_193272855.23-P1P2|ATP13A4_+_193272773.23-P1P2
ATP13A5	P1P2	ATP13A5_-_193096701.23-P1P2	ATP13A5_-_193096817.23-P1P2	predicted	predicted	GAGAAAATCTTCTCAGGAAC	GAAGAAGTTGGCAAACTAGA	ATP13A5_-_193096701.23-P1P2|ATP13A5_-_193096817.23-P1P2
ATP1A1	P1P2	ATP1A1_+_116915682.23-P1P2	ATP1A1_-_116915731.23-P1P2	predicted	predicted	GGCCAGTCCTGGCTCCCGGC	GAGGCGCTGTCCGGGCCCGT	ATP1A1_+_116915682.23-P1P2|ATP1A1_-_116915731.23-P1P2
ATP1A2	P1	ATP1A2_+_160085355.23-P1	ATP1A2_-_160085415.23-P1	predicted	predicted	GGGCTCCTCTCAACCCCCTC	GGGGACAAACGGGCTGTCTA	ATP1A2_+_160085355.23-P1|ATP1A2_-_160085415.23-P1
ATP1A2	P2	ATP1A2_+_160097993.23-P2	ATP1A2_+_160098074.23-P2	predicted	predicted	GAAAAGAGAGAATGGTAGGA	GaggcctgagAATCAGTGTA	ATP1A2_+_160097993.23-P2|ATP1A2_+_160098074.23-P2
ATP1A3	P1P2	ATP1A3_+_42498401.23-P1P2	ATP1A3_+_42498520.23-P1P2	predicted	predicted	GCGGACGCGGGCATATGAGG	GCGGCCGCGCCGCCACTTTG	ATP1A3_+_42498401.23-P1P2|ATP1A3_+_42498520.23-P1P2
ATP1A4	P1	ATP1A4_-_160146774.23-P1	ATP1A4_-_160147036.23-P1	predicted	predicted	Ggtcaggtgtgggagaccaa	GAATtgggagagggaatcag	ATP1A4_-_160146774.23-P1|ATP1A4_-_160147036.23-P1
ATP1A4	P2	ATP1A4_+_160121256.23-P2	ATP1A4_+_160121343.23-P2	predicted	predicted	GTCCAGGTCTGCTGTCGCAA	GGTTGCTGGGGCAATGACCC	ATP1A4_+_160121256.23-P2|ATP1A4_+_160121343.23-P2
ATP1B1	P1P2	ATP1B1_-_169075805.23-P1P2	ATP1B1_-_169075745.23-P1P2	predicted	predicted	GCGGCTGCGCGCCCACCAAT	GGGAGCCCCCGACCCCCCAA	ATP1B1_-_169075805.23-P1P2|ATP1B1_-_169075745.23-P1P2
ATP1B2	P1P2	ATP1B2_+_7554026.23-P1P2	ATP1B2_-_7554098.23-P1P2	predicted	predicted	GTACTAGACTGGGACAGGGT	GAGGTCCCTAAGAGAAGTCA	ATP1B2_+_7554026.23-P1P2|ATP1B2_-_7554098.23-P1P2
ATP1B3	P1P2	ATP1B3_+_141595303.23-P1P2	ATP1B3_+_141595346.23-P1P2	predicted	predicted	GcgccccgcAGTAGCCTCGG	GgcgcTGCCTGAGGCGGCGA	ATP1B3_+_141595303.23-P1P2|ATP1B3_+_141595346.23-P1P2
ATP1B4	P1P2	ATP1B4_+_119495788.23-P1P2	ATP1B4_-_119495743.23-P1P2	predicted	predicted	GCAAGCTCATCATTACAAGG	GGGTGGAAAGACATATAAAG	ATP1B4_+_119495788.23-P1P2|ATP1B4_-_119495743.23-P1P2
ATP2A1	P1P2	ATP2A1_-_28889225.23-P1P2	ATP2A1_-_28889653.23-P1P2	predicted	predicted	GGCAACCCCTCCCTAGGGTA	GCCCTCATGAGTGACATCTC	ATP2A1_-_28889225.23-P1P2|ATP2A1_-_28889653.23-P1P2
ATP2A2	P1P2	ATP2A2_-_110718861.23-P1P2	ATP2A2_-_110718870.23-P1P2	predicted	predicted	GGCGCGCGCGGCCTCGATCC	GGCCTCGATCCGGGTTCCTA	ATP2A2_-_110718861.23-P1P2|ATP2A2_-_110718870.23-P1P2
ATP2A3	P1P2	ATP2A3_+_3867807.23-P1P2	ATP2A3_-_3867858.23-P1P2	predicted	predicted	GCGGCCGGAAGGGGTGTGAT	GGCCCCGGGGCGCACCGCCT	ATP2A3_+_3867807.23-P1P2|ATP2A3_-_3867858.23-P1P2
ATP2B1	P1P2	ATP2B1_+_90102729.23-P1P2	ATP2B1_-_90103214.23-P1P2	predicted	predicted	GCGCCCTGTGTGCCGCTCTG	GAGGAACCGCGGCTCGGACC	ATP2B1_+_90102729.23-P1P2|ATP2B1_-_90103214.23-P1P2
ATP2B2	P1	ATP2B2_-_10547361.23-P1	ATP2B2_-_10547635.23-P1	predicted	predicted	GCGGCAAAATGCAATCTCGG	GGCACGGAGAGGGTAGGGCT	ATP2B2_-_10547361.23-P1|ATP2B2_-_10547635.23-P1
ATP2B2	P2	ATP2B2_+_10749959.23-P2	ATP2B2_+_10749969.23-P2	predicted	predicted	GACACGCCCCGGGGCAAGAC	GGTACCTGGAGACACGCCCC	ATP2B2_+_10749959.23-P2|ATP2B2_+_10749969.23-P2
ATP2B3	P1P2	ATP2B3_+_152782867.23-P1P2	ATP2B3_-_152782959.23-P1P2	predicted	predicted	GTGGGTGGGGATGGAAACTG	GGGGCACCCTCGCGCGTCCT	ATP2B3_+_152782867.23-P1P2|ATP2B3_-_152782959.23-P1P2
ATP2B4	P1P2	ATP2B4_-_203595772.23-P1P2	ATP2B4_-_203595767.23-P1P2	predicted	predicted	GAAGAAAGCCGACAGGGGAG	GCGGGGAAGAAAGCCGACAG	ATP2B4_-_203595772.23-P1P2|ATP2B4_-_203595767.23-P1P2
ATP2C1	P1P2	ATP2C1_-_130612919.23-P1P2	ATP2C1_-_130612970.23-P1P2	predicted	predicted	GGGCGGAGCGCAGGAGTCGG	GCCGGCCCGGCGGACCGTGA	ATP2C1_-_130612919.23-P1P2|ATP2C1_-_130612970.23-P1P2
ATP2C2	P1P2	ATP2C2_-_84401921.23-P1P2	ATP2C2_-_84402036.23-P1P2	predicted	predicted	GCCCACTCCAGGTGATTCTT	GGGGTCCCAGGCGAGCTCGC	ATP2C2_-_84401921.23-P1P2|ATP2C2_-_84402036.23-P1P2
ATP4A	P1	ATP4A_+_36054753.23-P1	ATP4A_-_36054692.23-P1	predicted	predicted	GTTGCTGCAGCGGTTCCCAG	GCACCTCAGGCATTCCCTCC	ATP4A_+_36054753.23-P1|ATP4A_-_36054692.23-P1
ATP4A	P2	ATP4A_-_36048881.23-P2	ATP4A_-_36048859.23-P2	predicted	predicted	GCTCTGAGAGCTGCGGGGAA	GggggccgagagcTCGGTGC	ATP4A_-_36048881.23-P2|ATP4A_-_36048859.23-P2
ATP4B	P1P2	ATP4B_+_114312654.23-P1P2	ATP4B_+_114312683.23-P1P2	predicted	predicted	GCGCCCCAGGGGCAACAGCC	GGCAGCAGGGTGAGGAAAGC	ATP4B_+_114312654.23-P1P2|ATP4B_+_114312683.23-P1P2
ATP5A1	P1	ATP5A1_-_43678306.23-P1	ATP5A1_+_43678488.23-P1	predicted	predicted	GACAGCCGGCCCACCTGACC	GGTCACCCGGGGCAACCACA	ATP5A1_-_43678306.23-P1|ATP5A1_+_43678488.23-P1
ATP5A1	P2	ATP5A1_-_43670002.23-P2	ATP5A1_+_43670008.23-P2	predicted	predicted	GGAACATCAATGAAGCTGAA	GGTAGTATTGGTGTATGGGG	ATP5A1_-_43670002.23-P2|ATP5A1_+_43670008.23-P2
ATP5B	P1P2	ATP5B_+_57039817.23-P1P2	ATP5B_+_57039317.23-P1P2	predicted	predicted	GGACCTGCCTACTGCAGCGT	GGGGTCTTGTGCATGCGGAT	ATP5B_+_57039817.23-P1P2|ATP5B_+_57039317.23-P1P2
ATP5C1	P1P2	ATP5C1_-_7830005.23-P1P2	ATP5C1_-_7830009.23-P1P2	predicted	predicted	GCCAGCTGAGAGGCGGAAGG	GCTGAGAGGCGGAAGGAGGT	ATP5C1_-_7830005.23-P1P2|ATP5C1_-_7830009.23-P1P2
ATP5D	P1P2	ATP5D_+_1241746.23-P1P2	ATP5D_+_1241591.23-P1P2	predicted	predicted	GACGACGCGCAGGGACGTCT	GCCAGGGGGTGGTCAGATAA	ATP5D_+_1241746.23-P1P2|ATP5D_+_1241591.23-P1P2
ATP5E	P1P2	ATP5E_+_57607616.23-P1P2	ATP5E_-_57607583.23-P1P2	predicted	predicted	GCCCGCCGGGGTAATACGGA	GgccggccgcgcccACCTAT	ATP5E_+_57607616.23-P1P2|ATP5E_-_57607583.23-P1P2
ATP5F1	P1P2	ATP5F1_+_111991904.23-P1P2	ATP5F1_-_111991939.23-P1P2	predicted	predicted	GCTCGCGAGAAGTAGAGTTG	GCTCGCGAGAATTGCTTCTA	ATP5F1_+_111991904.23-P1P2|ATP5F1_-_111991939.23-P1P2
ATP5G1	P1P2	ATP5G1_+_46970001.23-P1P2	ATP5G1_-_46969812.23-P1P2	predicted	predicted	GCCCGCCTCCATGCGGATAG	GGGCCCAAGCGCCCGAATGA	ATP5G1_+_46970001.23-P1P2|ATP5G1_-_46969812.23-P1P2
ATP5G2	P1P2	ATP5G2_-_54070074.23-P1P2	ATP5G2_-_54070052.23-P1P2	predicted	predicted	GAGCGCCGACTGCAGAAATG	GTTCGAGAGGAGAAACTACA	ATP5G2_-_54070074.23-P1P2|ATP5G2_-_54070052.23-P1P2
ATP5G3	P1P2	ATP5G3_-_176046633.23-P1P2	ATP5G3_-_176046498.23-P1P2	predicted	predicted	GAAAAACTGTAGATTCACCC	GCACCCGGATGAAGAAGGCG	ATP5G3_-_176046633.23-P1P2|ATP5G3_-_176046498.23-P1P2
ATP5H	P1P2	ATP5H_+_73043257.23-P1P2	ATP5H_+_73043136.23-P1P2	predicted	predicted	GAGCCGGGCCGGCCCATCGG	GAACCAGCCCTCATCTCTAT	ATP5H_+_73043257.23-P1P2|ATP5H_+_73043136.23-P1P2
ATP5I	P1P2	ATP5I_-_668251.23-P1P2	ATP5I_+_668183.23-P1P2	predicted	predicted	GCGCACGCGCACAAAGGCTG	GGGGGCGCGCAGTCACCCTT	ATP5I_-_668251.23-P1P2|ATP5I_+_668183.23-P1P2
ATP5J	P1P2	ATP5J_-_27107339.23-P1P2	ATP5J_+_27107502.23-P1P2	predicted	predicted	GAGACAGTCTGCGACCGGAC	GCGGAGGGGAGCTTGAACTA	ATP5J_-_27107339.23-P1P2|ATP5J_+_27107502.23-P1P2
ATP5J2	P1P2	ATP5J2_-_99063943.23-P1P2	ATP5J2_-_99063913.23-P1P2	predicted	predicted	GCCTGGACAGCAAAAATCCG	GCTAGAAGGCCATGAAGCGA	ATP5J2_-_99063943.23-P1P2|ATP5J2_-_99063913.23-P1P2
ATP5J2-PTCD1	P1	ATP5J2-PTCD1_-_99063943.23-P1	ATP5J2-PTCD1_-_99063913.23-P1	predicted	predicted	GCCTGGACAGCAAAAATCCG	GCTAGAAGGCCATGAAGCGA	ATP5J2-PTCD1_-_99063943.23-P1|ATP5J2-PTCD1_-_99063913.23-P1
ATP5J2-PTCD1	P2	ATP5J2-PTCD1_+_99036463.23-P2	ATP5J2-PTCD1_+_99036523.23-P2	predicted	predicted	GCTAGCCGCCAGCCGAACAC	GCCGGCCCTTGCGCCTGTCC	ATP5J2-PTCD1_+_99036463.23-P2|ATP5J2-PTCD1_+_99036523.23-P2
ATP5L	P1P2	ATP5L_+_118272113.23-P1P2	ATP5L_+_118272097.23-P1P2	predicted	predicted	GGAGAAGCAGGCATTTTGTG	GGTGGGGCAGCCACTCGTAG	ATP5L_+_118272113.23-P1P2|ATP5L_+_118272097.23-P1P2
ATP5L2	ENST00000505920.1	ATP5L2_+_43036768.23-ENST00000505920.1	ATP5L2_-_43036710.23-ENST00000505920.1	predicted	predicted	Gccttgttctcacgttgaga	Gtgagtggttcacttataca	ATP5L2_+_43036768.23-ENST00000505920.1|ATP5L2_-_43036710.23-ENST00000505920.1
ATP5O	P1P2	ATP5O_-_35288209.23-P1P2	ATP5O_+_35288247.23-P1P2	predicted	predicted	GAGGCGCAGAGACCTCCCTC	GCCCTGTGGCTCCACCCCGA	ATP5O_-_35288209.23-P1P2|ATP5O_+_35288247.23-P1P2
ATP5S	P1P2	ATP5S_+_50778869.23-P1P2	ATP5S_+_50778887.23-P1P2	predicted	predicted	GAGGGAGGGGAGCGTGCGTA	GGGCTTCTTCTGAGCGCTGA	ATP5S_+_50778869.23-P1P2|ATP5S_+_50778887.23-P1P2
ATP5SL	P1P2	ATP5SL_-_41945998.23-P1P2	ATP5SL_+_41945962.23-P1P2	predicted	predicted	GTCAAAACGAGACACAGGTC	GGTTTTGAAGCTCAGGGAGA	ATP5SL_-_41945998.23-P1P2|ATP5SL_+_41945962.23-P1P2
ATP6AP1	P1P2	ATP6AP1_+_153656798.23-P1P2	ATP6AP1_-_153656935.23-P1P2	predicted	predicted	GGGGCCCAGCTAGACCGACT	GTACCTGCGGCCCTGCCGGT	ATP6AP1_+_153656798.23-P1P2|ATP6AP1_-_153656935.23-P1P2
ATP6AP1L	P1P2	ATP6AP1L_-_81575503.23-P1P2	ATP6AP1L_-_81575388.23-P1P2	predicted	predicted	Ggagtagtgtggcattagat	Gggggtggctactctggata	ATP6AP1L_-_81575503.23-P1P2|ATP6AP1L_-_81575388.23-P1P2
ATP6AP2	P1P2	ATP6AP2_-_40439843.23-P1P2	ATP6AP2_-_40439922.23-P1P2	predicted	predicted	GGCTGGCGTCCGTAGCCGGG	GAGAAAGATCTGCACTCGGG	ATP6AP2_-_40439843.23-P1P2|ATP6AP2_-_40439922.23-P1P2
ATP6V0A1	P1P2	ATP6V0A1_+_40610773.23-P1P2	ATP6V0A1_+_40610694.23-P1P2	predicted	predicted	GCAGCAGTGCGGAGTCACGG	GCTGGGGAGGGTTAGCGGGT	ATP6V0A1_+_40610773.23-P1P2|ATP6V0A1_+_40610694.23-P1P2
ATP6V0A2	P1P2	ATP6V0A2_+_124196773.23-P1P2	ATP6V0A2_-_124196790.23-P1P2	predicted	predicted	GCCAACCAGCGCGAACCCGG	GGTACCCGCCGGGTTCGCGC	ATP6V0A2_+_124196773.23-P1P2|ATP6V0A2_-_124196790.23-P1P2
ATP6V0A4	P1	ATP6V0A4_-_138458794.23-P1	ATP6V0A4_+_138458694.23-P1	predicted	predicted	GAGCTCTGTTGTATCAACAC	GAAGCCACCTGCGGATTCAC	ATP6V0A4_-_138458794.23-P1|ATP6V0A4_+_138458694.23-P1
ATP6V0A4	P2	ATP6V0A4_-_138483130.23-P2	ATP6V0A4_-_138483134.23-P2	predicted	predicted	GCTGGGGCAGGGGGGGTCTT	GGGCAGGGGGGGTCTTAGGT	ATP6V0A4_-_138483130.23-P2|ATP6V0A4_-_138483134.23-P2
ATP6V0B	P1P2	ATP6V0B_+_44440526.23-P1P2	ATP6V0B_+_44440500.23-P1P2	predicted	predicted	GCCGCCGCCCGTCTAGAGCA	GGCTGGAACCGCAGGCGCTG	ATP6V0B_+_44440526.23-P1P2|ATP6V0B_+_44440500.23-P1P2
ATP6V0C	P1P2	ATP6V0C_-_2563536.23-P1P2	ATP6V0C_-_2563611.23-P1P2	predicted	predicted	GACCAGCGCCCGGAGGGGTG	GGTACAAAGAAAAGCGTCGC	ATP6V0C_-_2563536.23-P1P2|ATP6V0C_-_2563611.23-P1P2
ATP6V0D1	P1P2	ATP6V0D1_-_67515340.23-P1P2	ATP6V0D1_-_67515191.23-P1P2	predicted	predicted	GGGGCGGGCGGGGTAAAGAA	GGGAAGCGCGGTGCAGGCGT	ATP6V0D1_-_67515340.23-P1P2|ATP6V0D1_-_67515191.23-P1P2
ATP6V0D2	P1P2	ATP6V0D2_-_87110898.23-P1P2	ATP6V0D2_+_87110949.23-P1P2	predicted	predicted	GCTGGGAAGGGTCCCATCTG	GCAGGCAACAAACCACGATT	ATP6V0D2_-_87110898.23-P1P2|ATP6V0D2_+_87110949.23-P1P2
ATP6V0E1	P1P2	ATP6V0E1_-_172410645.23-P1P2	ATP6V0E1_+_172410707.23-P1P2	predicted	predicted	GTGACCGAATCCCTAGCTCT	GCGCCCCTCGGGGAGCCCAG	ATP6V0E1_-_172410645.23-P1P2|ATP6V0E1_+_172410707.23-P1P2
ATP6V0E2	P1P2	ATP6V0E2_-_149570915.23-P1P2	ATP6V0E2_-_149570972.23-P1P2	predicted	predicted	GCGGCCGCGCCCCTATTCCT	GAGCGAGTGGGCTCCTAGGC	ATP6V0E2_-_149570915.23-P1P2|ATP6V0E2_-_149570972.23-P1P2
ATP6V1A	P1P2	ATP6V1A_+_113465786.23-P1P2	ATP6V1A_+_113465500.23-P1P2	predicted	predicted	GCCAGCGCTCTACATCTCGG	GGGAGGGTAGCCAATCTATC	ATP6V1A_+_113465786.23-P1P2|ATP6V1A_+_113465500.23-P1P2
ATP6V1B1	P1P2	ATP6V1B1_-_71162733.23-P1P2	ATP6V1B1_-_71162658.23-P1P2	predicted	predicted	GGCACCTGATGGTCCAGGGG	GGGGCAGCCTGCCAGAAGTT	ATP6V1B1_-_71162733.23-P1P2|ATP6V1B1_-_71162658.23-P1P2
ATP6V1B2	P1P2	ATP6V1B2_+_20054680.23-P1P2	ATP6V1B2_-_20054779.23-P1P2	predicted	predicted	GCGCGCGGGCGCAGAGGGAA	GGCGCGAAGTCACGAGGCTg	ATP6V1B2_+_20054680.23-P1P2|ATP6V1B2_-_20054779.23-P1P2
ATP6V1C1	P1P2	ATP6V1C1_+_104033154.23-P1P2	ATP6V1C1_+_104033176.23-P1P2	predicted	predicted	GCAAGGGGACCCTATATTCG	GGGACTAGGAGGCTACGGGG	ATP6V1C1_+_104033154.23-P1P2|ATP6V1C1_+_104033176.23-P1P2
ATP6V1C2	P1P2	ATP6V1C2_-_10861581.23-P1P2	ATP6V1C2_+_10861647.23-P1P2	predicted	predicted	GGCCCTCGCGCGTAGGGGAC	GTCCCGCCTCGCTCCAGCCA	ATP6V1C2_-_10861581.23-P1P2|ATP6V1C2_+_10861647.23-P1P2
ATP6V1D	P1P2	ATP6V1D_+_67826661.23-P1P2	ATP6V1D_+_67826669.23-P1P2	predicted	predicted	GGGGAGGCGAACCGGAATTG	GGAGGGGTTGGGAGGCGAAC	ATP6V1D_+_67826661.23-P1P2|ATP6V1D_+_67826669.23-P1P2
ATP6V1E1	P1P2	ATP6V1E1_+_18111641.23-P1P2	ATP6V1E1_+_18111575.23-P1P2	predicted	predicted	GCACGAGTCAGCGACGTAGA	GGGCGTCGCTCTCTTCCCAT	ATP6V1E1_+_18111641.23-P1P2|ATP6V1E1_+_18111575.23-P1P2
ATP6V1E2	P1P2	ATP6V1E2_+_46769770.23-P1P2	ATP6V1E2_-_46769797.23-P1P2	predicted	predicted	Gccaacccgggcccctcccg	Ggaggggcccgggttggcgc	ATP6V1E2_+_46769770.23-P1P2|ATP6V1E2_-_46769797.23-P1P2
ATP6V1F	P1P2	ATP6V1F_-_128502867.23-P1P2	ATP6V1F_-_128502722.23-P1P2	predicted	predicted	GAGGACTGCGCATGCTCGAA	GaacgaatgaatgCCCGCGA	ATP6V1F_-_128502867.23-P1P2|ATP6V1F_-_128502722.23-P1P2
ATP6V1G1	P1P2	ATP6V1G1_-_117350045.23-P1P2	ATP6V1G1_-_117349886.23-P1P2	predicted	predicted	GAGCAAGCGCAGATTGTGGG	GACTGCGCAGTAGACTGCAC	ATP6V1G1_-_117350045.23-P1P2|ATP6V1G1_-_117349886.23-P1P2
ATP6V1G2	P1P2	ATP6V1G2_+_31514510.23-P1P2	ATP6V1G2_+_31514513.23-P1P2	predicted	predicted	GAGGACCAGTCATCAATAGG	GAGGAGGACCAGTCATCAAT	ATP6V1G2_+_31514510.23-P1P2|ATP6V1G2_+_31514513.23-P1P2
ATP6V1G3	P1P2	ATP6V1G3_-_198509956.23-P1P2	ATP6V1G3_-_198509953.23-P1P2	predicted	predicted	GTCCCAAGGAAAGCCCAAGG	GGGGTCCCAAGGAAAGCCCA	ATP6V1G3_-_198509956.23-P1P2|ATP6V1G3_-_198509953.23-P1P2
ATP6V1H	P1P2	ATP6V1H_-_54755995.23-P1P2	ATP6V1H_-_54755941.23-P1P2	predicted	predicted	GGGGCCCCGGAGCGACGCAA	GCGCTGCGGCGGGGCTTGTT	ATP6V1H_-_54755995.23-P1P2|ATP6V1H_-_54755941.23-P1P2
ATP7A	P1P2	ATP7A_-_77166117.23-P1P2	ATP7A_-_77166129.23-P1P2	predicted	predicted	GAGGGGCATCACCCGGAAGT	GCGGAAGTGGGGGTAGTCGA	ATP7A_-_77166117.23-P1P2|ATP7A_-_77166129.23-P1P2
ATP7B	P1P2	ATP7B_-_52586304.23-P1P2	ATP7B_-_52586264.23-P1P2	predicted	predicted	GAGCGACGGCTGTCAATCAC	GCAGGCGGGGGCTTCTAGTG	ATP7B_-_52586304.23-P1P2|ATP7B_-_52586264.23-P1P2
ATP8A1	P1P2	ATP8A1_+_42659356.23-P1P2	ATP8A1_-_42659243.23-P1P2	predicted	predicted	GGTCAACCAACTCCACAGGG	GAGCAAGGAAGGCGGGTGAG	ATP8A1_+_42659356.23-P1P2|ATP8A1_-_42659243.23-P1P2
ATP8A2	P1P2	ATP8A2_+_25945974.23-P1P2	ATP8A2_+_25946001.23-P1P2	predicted	predicted	GGCGATGGGGAGGGCTTGGT	GGACCGGGGCTTTTAGGTGT	ATP8A2_+_25945974.23-P1P2|ATP8A2_+_25946001.23-P1P2
ATP8B1	P1P2	ATP8B1_+_55470744.23-P1P2	ATP8B1_+_55470714.23-P1P2	predicted	predicted	GGGGCTCGGAAGACTGAAAG	GTGACTCCAGGACGCACGGA	ATP8B1_+_55470744.23-P1P2|ATP8B1_+_55470714.23-P1P2
ATP8B2	P1	ATP8B2_-_154297890.23-P1	ATP8B2_-_154297652.23-P1	predicted	predicted	GGCCACGCCGAGGCTCGGAA	GGCTCCGAGGAGCGAGAGTC	ATP8B2_-_154297890.23-P1|ATP8B2_-_154297652.23-P1
ATP8B2	P2	ATP8B2_+_154301186.23-P2	ATP8B2_-_154301078.23-P2	predicted	predicted	GGACACGCCGAGCACGCCCA	GGCAGTCCGCTCACCCGCAT	ATP8B2_+_154301186.23-P2|ATP8B2_-_154301078.23-P2
ATP8B3	P1P2	ATP8B3_-_1812400.23-P1P2	ATP8B3_-_1812448.23-P1P2	predicted	predicted	Gtggggccaaggcgaagaag	Ggagcacggccgagcaggat	ATP8B3_-_1812400.23-P1P2|ATP8B3_-_1812448.23-P1P2
ATP8B4	P1P2	ATP8B4_-_50411473.23-P1P2	ATP8B4_+_50411680.23-P1P2	predicted	predicted	GAAAACAAACTGGGTCTCTA	GCAGCAGGAGCAGGCAACTA	ATP8B4_-_50411473.23-P1P2|ATP8B4_+_50411680.23-P1P2
ATP9A	P1P2	ATP9A_-_50385055.23-P1P2	ATP9A_+_50385205.23-P1P2	predicted	predicted	Ggggccgggcccgcagcgag	Ggacactgcagcggtcgcgg	ATP9A_-_50385055.23-P1P2|ATP9A_+_50385205.23-P1P2
ATP9B	P1P2	ATP9B_-_76829275.23-P1P2	ATP9B_-_76829295.23-P1P2	predicted	predicted	GCCGCCGCTCGTTACGTCAT	GGGACCTCGCCGCTTGGCGG	ATP9B_-_76829275.23-P1P2|ATP9B_-_76829295.23-P1P2
ATPAF1	P1P2	ATPAF1_+_47134200.23-P1P2	ATPAF1_+_47134197.23-P1P2	predicted	predicted	GGCGGGCCGTGGCATACACA	GGGCCGTGGCATACACAGGG	ATPAF1_+_47134200.23-P1P2|ATPAF1_+_47134197.23-P1P2
ATPAF2	P1P2	ATPAF2_-_17942718.23-P1P2	ATPAF2_+_17942627.23-P1P2	predicted	predicted	GTGAGCCAATCGGAAGGGGC	GGGCGGGAGGAGAAAACACG	ATPAF2_-_17942718.23-P1P2|ATPAF2_+_17942627.23-P1P2
ATPIF1	P1P2	ATPIF1_+_28562466.23-P1P2	ATPIF1_-_28562492.23-P1P2	predicted	predicted	GAGCAAGGGCTTAGGGCCAA	GGGCCCTAAGCCCTTGCTAG	ATPIF1_+_28562466.23-P1P2|ATPIF1_-_28562492.23-P1P2
ATR	P1P2	ATR_+_142297811.23-P1P2	ATR_-_142297743.23-P1P2	predicted	predicted	GTTCACGAACGTCGCTCGCT	GGGAAGCCGGGAAGCCGTTA	ATR_+_142297811.23-P1P2|ATR_-_142297743.23-P1P2
ATRAID	P1P2	ATRAID_-_27434957.23-P1P2	ATRAID_-_27435166.23-P1P2	predicted	predicted	GTCCGGACGCGGGGAACACC	GAGGCCACGCCCGGGGAAGA	ATRAID_-_27434957.23-P1P2|ATRAID_-_27435166.23-P1P2
ATRIP	P1P2	ATRIP_+_48488012.23-P1P2	ATRIP_-_48487908.23-P1P2	predicted	predicted	GTCCACGGGCGGGATTCGGC	GCCTGCGCGGCCCTCCTCCA	ATRIP_+_48488012.23-P1P2|ATRIP_-_48487908.23-P1P2
ATRN	P1P2	ATRN_+_3451583.23-P1P2	ATRN_+_3451555.23-P1P2	predicted	predicted	Gcgcgcgtgcgcgagtacgt	GcgtgcgGGGGCGCAGACAG	ATRN_+_3451583.23-P1P2|ATRN_+_3451555.23-P1P2
ATRNL1	P1P2	ATRNL1_-_116852928.23-P1P2	ATRNL1_+_116853043.23-P1P2	predicted	predicted	GgggcggccccACGCATCGT	GTGGGCGCGCCCAACGTGGA	ATRNL1_-_116852928.23-P1P2|ATRNL1_+_116853043.23-P1P2
ATRX	P1P2	ATRX_-_77041829.23-P1P2	ATRX_+_77041845.23-P1P2	predicted	predicted	GTGGGGGCCTGTTGCTAAGG	GCCCCTGCGAAAAGGTGGAG	ATRX_-_77041829.23-P1P2|ATRX_+_77041845.23-P1P2
ATXN1	P1P2	ATXN1_+_16761889.23-P1P2	ATXN1_-_16761916.23-P1P2	predicted	predicted	GAAGTCGGATCCTTGAGCTG	GCTCAAGGATCCGACTTCAT	ATXN1_+_16761889.23-P1P2|ATXN1_-_16761916.23-P1P2
ATXN10	P1P2	ATXN10_+_46067580.23-P1P2	ATXN10_+_46067667.23-P1P2	predicted	predicted	GCAGACGGGGCTCCTCCGAG	GgAAGTCCCGCCTGAGGGGA	ATXN10_+_46067580.23-P1P2|ATXN10_+_46067667.23-P1P2
ATXN1L	P1P2	ATXN1L_+_71879707.23-P1P2	ATXN1L_+_71879604.23-P1P2	predicted	predicted	GGGACCGGGTCACGTGAATA	GAGCCCCGGGGCGTGGTCAT	ATXN1L_+_71879707.23-P1P2|ATXN1L_+_71879604.23-P1P2
ATXN2	P1P2	ATXN2_-_112037277.23-P1P2	ATXN2_-_112037445.23-P1P2	predicted	predicted	GGCGAAGCGGCGAGACTCGG	GGGGCCGGGAGGGACACGTG	ATXN2_-_112037277.23-P1P2|ATXN2_-_112037445.23-P1P2
ATXN2L	P1P2	ATXN2L_+_28834273.23-P1P2	ATXN2L_-_28834085.23-P1P2	predicted	predicted	GCGGGTGGGAGCTCCCgggg	GCGGCCGCCGGCTTCTAAGG	ATXN2L_+_28834273.23-P1P2|ATXN2L_-_28834085.23-P1P2
ATXN3	P1P2	ATXN3_-_92573081.23-P1P2	ATXN3_+_92573107.23-P1P2	predicted	predicted	GGAAGAGCGAGTGAACGCCG	GAGGCCCGCTAACAGAAGCT	ATXN3_-_92573081.23-P1P2|ATXN3_+_92573107.23-P1P2
ATXN3L	P1P2	ATXN3L_-_13338294.23-P1P2	ATXN3L_+_13338345.23-P1P2	predicted	predicted	GGTAAACCTAAAGTGAATAT	GGGACATCTGAAATTCCAAC	ATXN3L_-_13338294.23-P1P2|ATXN3L_+_13338345.23-P1P2
ATXN7	ENST00000398590.3	ATXN7_+_63849827.23-ENST00000398590.3	ATXN7_+_63849675.23-ENST00000398590.3	predicted	predicted	GTCCGGGCGAGCTCACCTGG	GgccgcccccggggAGTACC	ATXN7_+_63849827.23-ENST00000398590.3|ATXN7_+_63849675.23-ENST00000398590.3
ATXN7	ENST00000538065.1	ATXN7_+_63898031.23-ENST00000538065.1	ATXN7_-_63898304.23-ENST00000538065.1	predicted	predicted	GGACTCCCGCGGCCGCCCGA	GCGGGCCGCGGATGACGTCA	ATXN7_+_63898031.23-ENST00000538065.1|ATXN7_-_63898304.23-ENST00000538065.1
ATXN7L1	P1P2	ATXN7L1_-_105517376.23-P1P2	ATXN7L1_+_105517131.23-P1P2	predicted	predicted	GCCGACGCGGGGCCGAAGGA	GCGCGCGAGCCCCACCGAGC	ATXN7L1_-_105517376.23-P1P2|ATXN7L1_+_105517131.23-P1P2
ATXN7L2	P1P2	ATXN7L2_-_110026416.23-P1P2	ATXN7L2_-_110026516.23-P1P2	predicted	predicted	GCAGAAGGCTGTGAGTGGGT	GGGGAGGCGTGCCCgcgacg	ATXN7L2_-_110026416.23-P1P2|ATXN7L2_-_110026516.23-P1P2
ATXN7L3	P1P2	ATXN7L3_+_42275884.23-P1P2	ATXN7L3_-_42277665.23-P1P2	predicted	predicted	GAGTCTTTAGGGAAGGCGGG	GTGGGGCGGCGTTCAAGGTG	ATXN7L3_+_42275884.23-P1P2|ATXN7L3_-_42277665.23-P1P2
ATXN7L3B	P1P2	ATXN7L3B_+_74931522.23-P1P2	ATXN7L3B_-_74931599.23-P1P2	predicted	predicted	GTGGTTCCGCGCAGACTCTT	GGCGGGGCTAGGCCCGACAG	ATXN7L3B_+_74931522.23-P1P2|ATXN7L3B_-_74931599.23-P1P2
AUH	P1P2	AUH_+_94124307.23-P1P2	AUH_+_94124295.23-P1P2	predicted	predicted	GGGCTTCggcggggcagtga	Ggcagtgaggggcgggaaca	AUH_+_94124307.23-P1P2|AUH_+_94124295.23-P1P2
AUNIP	P1P2	AUNIP_+_26186013.23-P1P2	AUNIP_+_26186050.23-P1P2	predicted	predicted	GCGTGGGCGGGGCACAGCGA	GCCGCACGCACTCAAGGGAC	AUNIP_+_26186013.23-P1P2|AUNIP_+_26186050.23-P1P2
AUP1	P1P2	AUP1_+_74756994.23-P1P2	AUP1_-_74757106.23-P1P2	predicted	predicted	GCCGGGACCAGGATTCCGGG	GGTGCCGCCTCTGAGTAGGG	AUP1_+_74756994.23-P1P2|AUP1_-_74757106.23-P1P2
AURKA	P1P2	AURKA_+_54967481.23-P1P2	AURKA_+_54967526.23-P1P2	predicted	predicted	GCCGACCGCGGAGAGCACCC	GGCGTCAAGCTTGACGTCAA	AURKA_+_54967481.23-P1P2|AURKA_+_54967526.23-P1P2
AURKAIP1	P1P2	AURKAIP1_+_1310661.23-P1P2	AURKAIP1_-_1310881.23-P1P2	predicted	predicted	GTGAGCCAATGCAGAATCGG	GCAGGGGCCGGATTCCCAAC	AURKAIP1_+_1310661.23-P1P2|AURKAIP1_-_1310881.23-P1P2
AURKB	P1P2	AURKB_-_8114044.23-P1P2	AURKB_-_8114014.23-P1P2	predicted	predicted	GGGAAGAGGCGGAATGAGAA	GGTCCTGTGACGTAAGTCAT	AURKB_-_8114044.23-P1P2|AURKB_-_8114014.23-P1P2
AURKC	P1P2	AURKC_+_57742317.23-P1P2	AURKC_+_57742253.23-P1P2	predicted	predicted	GGGAAGTGCGCCCAATAGAA	GGAACTGGAGTGCTGCGGTC	AURKC_+_57742317.23-P1P2|AURKC_+_57742253.23-P1P2
AUTS2	P1P2	AUTS2_+_69063202.23-P1P2	AUTS2_-_69063228.23-P1P2	predicted	predicted	GgccggcgggATCACGTGGA	GCACGTGATcccgccggccg	AUTS2_+_69063202.23-P1P2|AUTS2_-_69063228.23-P1P2
AVEN	P1P2	AVEN_-_34331446.23-P1P2	AVEN_+_34331351.23-P1P2	predicted	predicted	GggCCGGCGTCCCGCAGGTG	GCCCGCGCCTCGCTGCTACC	AVEN_-_34331446.23-P1P2|AVEN_+_34331351.23-P1P2
AVIL	P1P2	AVIL_-_58212783.23-P1P2	AVIL_-_58212833.23-P1P2	predicted	predicted	GATGCAGGAAAGAGGTTGGA	GGATGCATTATGGTGATGAC	AVIL_-_58212783.23-P1P2|AVIL_-_58212833.23-P1P2
AVL9	P1P2	AVL9_+_32534971.23-P1P2	AVL9_+_32534968.23-P1P2	predicted	predicted	Gaggagagatcgactctgtg	Gagagatcgactctgtgggg	AVL9_+_32534971.23-P1P2|AVL9_+_32534968.23-P1P2
AVP	P1P2	AVP_-_3065732.23-P1P2	AVP_-_3065633.23-P1P2	predicted	predicted	GAGAGGGTAAGAGGAACCGA	GCTGCAGCGCTCTGGATTCA	AVP_-_3065732.23-P1P2|AVP_-_3065633.23-P1P2
AVPI1	P1P2	AVPI1_+_99447223.23-P1P2	AVPI1_-_99447114.23-P1P2	predicted	predicted	GGGGACTGACGTCAATGAAg	GCCTCCGCTGGCCTCGAAAG	AVPI1_+_99447223.23-P1P2|AVPI1_-_99447114.23-P1P2
AVPR1A	P1P2	AVPR1A_+_63545193.23-P1P2	AVPR1A_+_63545203.23-P1P2	predicted	predicted	GTAGCGAGGAAGGCTAGTGA	GTTAAGGAGGCTAGCGAGGA	AVPR1A_+_63545193.23-P1P2|AVPR1A_+_63545203.23-P1P2
AVPR1B	P1P2	AVPR1B_-_206223829.23-P1P2	AVPR1B_+_206223810.23-P1P2	predicted	predicted	GGGCCTCTCGGTCATCCCGC	GACCCGGCGGGATGACCGAG	AVPR1B_-_206223829.23-P1P2|AVPR1B_+_206223810.23-P1P2
AVPR2	P1P2	AVPR2_-_153170007.23-P1P2	AVPR2_-_153169997.23-P1P2	predicted	predicted	GTGGAGGCTATGGCAGTGGG	GAGGGTGGGCGTGGAGGCTA	AVPR2_-_153170007.23-P1P2|AVPR2_-_153169997.23-P1P2
AWAT1	P1P2	AWAT1_-_69454355.23-P1P2	AWAT1_-_69454340.23-P1P2	predicted	predicted	GGAGCTGGACCAGACCTGAC	GAGTCAAAGGGCAAATGAGC	AWAT1_-_69454355.23-P1P2|AWAT1_-_69454340.23-P1P2
AWAT2	P1P2	AWAT2_+_69269980.23-P1P2	AWAT2_+_69269972.23-P1P2	predicted	predicted	GCCCAAGTGGGTAAAAGTAC	GGGTAAAAGTACAGGTGAGT	AWAT2_+_69269980.23-P1P2|AWAT2_+_69269972.23-P1P2
AXDND1	P1P2	AXDND1_-_179335054.23-P1P2	AXDND1_+_179334781.23-P1P2	predicted	predicted	GTGAAGGCAGCCCCTATGGA	GACGCACGCGGGTTAAGCAA	AXDND1_-_179335054.23-P1P2|AXDND1_+_179334781.23-P1P2
AXIN1	P1P2	AXIN1_-_402816.23-P1P2	AXIN1_-_402872.23-P1P2	predicted	predicted	Gagcgcggggacgaggtaaa	Gaaagcgcgaggataaagtg	AXIN1_-_402816.23-P1P2|AXIN1_-_402872.23-P1P2
AXIN2	P1	AXIN2_-_63556664.23-P1	AXIN2_+_63556591.23-P1	predicted	predicted	GACAGCGACGCGACCCCCGG	GTGCGCGCGGGAGTGCCTTT	AXIN2_-_63556664.23-P1|AXIN2_+_63556591.23-P1
AXIN2	P2	AXIN2_+_63557866.23-P2	AXIN2_+_63557856.23-P2	predicted	predicted	GCGGAGGAGAGGCCGGGGAA	GGCCGGGGAAGGGTTAACGC	AXIN2_+_63557866.23-P2|AXIN2_+_63557856.23-P2
AXL	P1P2	AXL_-_41724835.23-P1P2	AXL_+_41724881.23-P1P2	predicted	predicted	GTGAGAGGGGAGTGGAGTTC	GAGGCCGTGTCTCTCTATCC	AXL_-_41724835.23-P1P2|AXL_+_41724881.23-P1P2
AZGP1	P1P2	AZGP1_-_99573930.23-P1P2	AZGP1_-_99573867.23-P1P2	predicted	predicted	GGGTAGGAGGTGCGTGTGAT	GTGAGTCCAGAGTTGATCTC	AZGP1_-_99573930.23-P1P2|AZGP1_-_99573867.23-P1P2
AZI1	P1P2	AZI1_-_79196938.23-P1P2	AZI1_-_79196900.23-P1P2	predicted	predicted	GAGGAGCGGCGGATGGCTGA	GGGGCCGCTCGGCTGTCCTT	AZI1_-_79196938.23-P1P2|AZI1_-_79196900.23-P1P2
AZI2	P1P2	AZI2_-_28390585.23-P1P2	AZI2_+_28390525.23-P1P2	predicted	predicted	GAAGCCAGGTTCGGTCGTGG	GCTCCCTCGGGCCTGACTTC	AZI2_-_28390585.23-P1P2|AZI2_+_28390525.23-P1P2
AZIN1	P1P2	AZIN1_-_103876594.23-P1P2	AZIN1_-_103876508.23-P1P2	predicted	predicted	GGGGTCATGCAGGTGCAGAC	GGGTTGCAGCCCGGAGAAAA	AZIN1_-_103876594.23-P1P2|AZIN1_-_103876508.23-P1P2
AZU1	P1	AZU1_-_827685.23-P1	AZU1_-_827798.23-P1	predicted	predicted	GGATCAGTGCAGAATGTAGG	GGGGACGCCACCAACTGCCA	AZU1_-_827685.23-P1|AZU1_-_827798.23-P1
AZU1	P2	AZU1_-_825025.23-P2	AZU1_-_825002.23-P2	predicted	predicted	GAGAGTCTATCCCTGTCTCA	GCAGCACTGTTCTGTCTAGA	AZU1_-_825025.23-P2|AZU1_-_825002.23-P2
B2M	P1	B2M_-_45003626.23-P1	B2M_+_45003597.23-P1	predicted	predicted	GTAACCTGGCACTGCGTCGC	GGCAGTGCCAGGTTAGAGAG	B2M_-_45003626.23-P1|B2M_+_45003597.23-P1
B2M	P2	B2M_+_45007566.23-P2	B2M_+_45007614.23-P2	predicted	predicted	GTGCCAGGGTATTTCACTTG	GTGAATCTTTGGAGTACCTG	B2M_+_45007566.23-P2|B2M_+_45007614.23-P2
B3GALNT1	P1P2	B3GALNT1_+_160823195.23-P1P2	B3GALNT1_+_160823217.23-P1P2	predicted	predicted	GCGCGCCATGCGAGCTCACA	GGTGACCGCGAGGACCCAGA	B3GALNT1_+_160823195.23-P1P2|B3GALNT1_+_160823217.23-P1P2
B3GALNT2	P1P2	B3GALNT2_+_235668008.23-P1P2	B3GALNT2_-_235667887.23-P1P2	predicted	predicted	GGGGTGGCAGCAAACGTCAA	GGGGAGCTGAAGTCCCGCTC	B3GALNT2_+_235668008.23-P1P2|B3GALNT2_-_235667887.23-P1P2
B3GALT1	P1P2	B3GALT1_+_168725224.23-P1P2	B3GALT1_+_168725244.23-P1P2	predicted	predicted	GGGTATAAGAATTGCCCTCA	GACTGAAATAAACATAACAA	B3GALT1_+_168725224.23-P1P2|B3GALT1_+_168725244.23-P1P2
B3GALT2	P1P2	B3GALT2_-_193155847.23-P1P2	B3GALT2_+_193155801.23-P1P2	predicted	predicted	GTGACTAAAAACCTAAGGTA	GTGAATGCAAACAATCACGT	B3GALT2_-_193155847.23-P1P2|B3GALT2_+_193155801.23-P1P2
B3GALT4	P1P2	B3GALT4_-_33244756.23-P1P2	B3GALT4_+_33244820.23-P1P2	predicted	predicted	GTCTCCCTGGTGGAGTACGT	GGCGGCAGGGCGCGGAAACC	B3GALT4_-_33244756.23-P1P2|B3GALT4_+_33244820.23-P1P2
B3GALT5	ENST00000343118.4,ENST00000398714.2	B3GALT5_+_41029614.23-ENST00000343118.4,ENST00000398714.2	B3GALT5_+_41029537.23-ENST00000343118.4,ENST00000398714.2	predicted	predicted	Gggtaggtaggtaagtcggt	Gttggctagcgtgattacgg	B3GALT5_+_41029614.23-ENST00000343118.4,ENST00000398714.2|B3GALT5_+_41029537.23-ENST00000343118.4,ENST00000398714.2
B3GALT5	ENST00000380618.1	B3GALT5_-_41028940.23-ENST00000380618.1	B3GALT5_-_41028902.23-ENST00000380618.1	predicted	predicted	GAGGGCGGGAGCCAGCAGAT	GAGGCACTATGGCCAGAAGG	B3GALT5_-_41028940.23-ENST00000380618.1|B3GALT5_-_41028902.23-ENST00000380618.1
B3GALT5	ENST00000380620.4	B3GALT5_-_40928251.23-ENST00000380620.4	B3GALT5_+_40928285.23-ENST00000380620.4	predicted	predicted	GTGAAGAGGCAAACTGTGGA	GGGCTCTCAGAGCCACTTCA	B3GALT5_-_40928251.23-ENST00000380620.4|B3GALT5_+_40928285.23-ENST00000380620.4
B3GALT6	P1P2	B3GALT6_-_1167478.23-P1P2	B3GALT6_-_1167403.23-P1P2	predicted	predicted	GCGAGGTTGACCAATGACAA	GAACGGGCGCGACCTCACGG	B3GALT6_-_1167478.23-P1P2|B3GALT6_-_1167403.23-P1P2
B3GALTL	P1P2	B3GALTL_-_31773986.23-P1P2	B3GALTL_-_31774035.23-P1P2	predicted	predicted	GCCGCAGCAGCCCGTCGGGC	GGACGCTGGAAGCGCGCACA	B3GALTL_-_31773986.23-P1P2|B3GALTL_-_31774035.23-P1P2
B3GAT1	P1P2	B3GAT1_+_134282294.23-P1P2	B3GAT1_-_134282287.23-P1P2	predicted	predicted	GGAGGTGATACCAATCCCGG	GCGAGGAGGGAGGCCGGCGA	B3GAT1_+_134282294.23-P1P2|B3GAT1_-_134282287.23-P1P2
B3GAT2	P1P2	B3GAT2_+_71666918.23-P1P2	B3GAT2_-_71666889.23-P1P2	predicted	predicted	GGGGCCGTTAGCGCCAGACC	GGTGGAGAGGGGCTGCGAGA	B3GAT2_+_71666918.23-P1P2|B3GAT2_-_71666889.23-P1P2
B3GAT3	P1P2	B3GAT3_+_62389616.23-P1P2	B3GAT3_-_62389750.23-P1P2	predicted	predicted	GAATCAAGTCTACAAGGCGG	GTAGGTGCAGAATCTCGAGT	B3GAT3_+_62389616.23-P1P2|B3GAT3_-_62389750.23-P1P2
B3GNT1	P1P2	B3GNT1_-_66115232.23-P1P2	B3GNT1_+_66115220.23-P1P2	predicted	predicted	GGGCTCGCCCCCTACGAGGG	GgTGGCTCCTCCTCCCTCGT	B3GNT1_-_66115232.23-P1P2|B3GNT1_+_66115220.23-P1P2
B3GNT2	P1P2	B3GNT2_-_62423106.23-P1P2	B3GNT2_+_62422892.23-P1P2	predicted	predicted	GGTGGGTCCTGGTACCGGGT	GTTGTGGGTGGCCCCTCTTG	B3GNT2_-_62423106.23-P1P2|B3GNT2_+_62422892.23-P1P2
B3GNT3	P1P2	B3GNT3_-_17905816.23-P1P2	B3GNT3_-_17905788.23-P1P2	predicted	predicted	GCCGGCAGAGAACTTCGCCT	GGGAAGAGGCATGGCCGGGG	B3GNT3_-_17905816.23-P1P2|B3GNT3_-_17905788.23-P1P2
B3GNT4	P1P2	B3GNT4_-_122688056.23-P1P2	B3GNT4_+_122688100.23-P1P2	predicted	predicted	GGTCCCGCCGCACGCGTCGG	GGGTCCGCACGAGCCGGGTC	B3GNT4_-_122688056.23-P1P2|B3GNT4_+_122688100.23-P1P2
B3GNT5	P1P2	B3GNT5_-_182970803.23-P1P2	B3GNT5_-_182970851.23-P1P2	predicted	predicted	GAGGACATTCATGTGCACTC	GATCGCAATTAACTGACGAG	B3GNT5_-_182970803.23-P1P2|B3GNT5_-_182970851.23-P1P2
B3GNT6	P1P2	B3GNT6_-_76745287.23-P1P2	B3GNT6_+_76745256.23-P1P2	predicted	predicted	GTCACTGGACCCACACTCTA	GTGGGTCCAGTGAATATCCT	B3GNT6_-_76745287.23-P1P2|B3GNT6_+_76745256.23-P1P2
B3GNT7	P1P2	B3GNT7_-_232260336.23-P1P2	B3GNT7_-_232260211.23-P1P2	predicted	predicted	GcgggccctgggcgccgAAG	GGATTGGAGGTGACCCCCGT	B3GNT7_-_232260336.23-P1P2|B3GNT7_-_232260211.23-P1P2
B3GNT8	P1P2	B3GNT8_-_41934003.23-P1P2	B3GNT8_-_41933992.23-P1P2	predicted	predicted	GGCCCTGTGGGGTGCTCATG	GGGGTTGCGGAAGCCCTGTG	B3GNT8_-_41934003.23-P1P2|B3GNT8_-_41933992.23-P1P2
B3GNT9	P1P2	B3GNT9_-_67184998.23-P1P2	B3GNT9_+_67185017.23-P1P2	predicted	predicted	GTGGGGACTAATCCCTGAGA	GCAGACCAGCCCTTCCCAGA	B3GNT9_-_67184998.23-P1P2|B3GNT9_+_67185017.23-P1P2
B3GNTL1	P1	B3GNTL1_+_81009836.23-P1	B3GNTL1_-_81009785.23-P1	predicted	predicted	GGGCCCAGGGCGGAAGACTG	GAGGGGTGGGCCTCCCggag	B3GNTL1_+_81009836.23-P1|B3GNTL1_-_81009785.23-P1
B3GNTL1	P2	B3GNTL1_-_81006512.23-P2	B3GNTL1_+_81006607.23-P2	predicted	predicted	GTCAACCGTTGCTTACACTG	GGTGGCTGGACGAATGTTTG	B3GNTL1_-_81006512.23-P2|B3GNTL1_+_81006607.23-P2
B4GALNT1	P1P2	B4GALNT1_+_58027384.23-P1P2	B4GALNT1_+_58027465.23-P1P2	predicted	predicted	GTGCACCAAGCGGCAGTTCG	GGGTATCAGGCTATGACCTA	B4GALNT1_+_58027384.23-P1P2|B4GALNT1_+_58027465.23-P1P2
B4GALNT2	P1P2	B4GALNT2_-_47209897.23-P1P2	B4GALNT2_-_47209877.23-P1P2	predicted	predicted	GGGACCGTGGTGATAGACTA	GTAGCGAGGAAGGAACGGTA	B4GALNT2_-_47209897.23-P1P2|B4GALNT2_-_47209877.23-P1P2
B4GALNT3	P1P2	B4GALNT3_-_569271.23-P1P2	B4GALNT3_+_569005.23-P1P2	predicted	predicted	GGCCTGCGACGGGAGAGGCG	GAGGCCATTCGGCTTCCCTA	B4GALNT3_-_569271.23-P1P2|B4GALNT3_+_569005.23-P1P2
B4GALNT4	P1P2	B4GALNT4_+_369294.23-P1P2	B4GALNT4_+_369439.23-P1P2	predicted	predicted	GGAGGGGTGCGGGACGGACA	GCCAGGCCGCGGGGAGCCAA	B4GALNT4_+_369294.23-P1P2|B4GALNT4_+_369439.23-P1P2
B4GALT1	P1P2	B4GALT1_-_33167432.23-P1P2	B4GALT1_-_33167715.23-P1P2	predicted	predicted	GGggttttctggacgagggc	GAGCGCGGCGGCGGAGAGAA	B4GALT1_-_33167432.23-P1P2|B4GALT1_-_33167715.23-P1P2
B4GALT2	P1P2	B4GALT2_+_44444773.23-P1P2	B4GALT2_+_44445508.23-P1P2	predicted	predicted	GccTGCCGGCGGCCGAACCC	GCAGGCCGCACAGACCGGGT	B4GALT2_+_44444773.23-P1P2|B4GALT2_+_44445508.23-P1P2
B4GALT3	P1P2	B4GALT3_+_161147580.23-P1P2	B4GALT3_-_161147451.23-P1P2	predicted	predicted	GTCAGCGGAGCACCAGAAAC	GTAGGCGACCCCCTGGGGAG	B4GALT3_+_161147580.23-P1P2|B4GALT3_-_161147451.23-P1P2
B4GALT4	P1P2	B4GALT4_-_118959921.23-P1P2	B4GALT4_+_118959865.23-P1P2	predicted	predicted	GAGCACCGGGAGGGAAACGG	GGGTGTGGTCGATTTGGCGG	B4GALT4_-_118959921.23-P1P2|B4GALT4_+_118959865.23-P1P2
B4GALT5	P1P2	B4GALT5_+_48330673.23-P1P2	B4GALT5_+_48330561.23-P1P2	predicted	predicted	GGCCCCTTGGCCCCCGAGAT	GACTCCATGCGGGCTGCTGT	B4GALT5_+_48330673.23-P1P2|B4GALT5_+_48330561.23-P1P2
B4GALT6	P1P2	B4GALT6_-_29264574.23-P1P2	B4GALT6_-_29264868.23-P1P2	predicted	predicted	Ggggagcggacggaatgaat	GAAGCCCCGTGCTTAAGGTC	B4GALT6_-_29264574.23-P1P2|B4GALT6_-_29264868.23-P1P2
B4GALT7	P1P2	B4GALT7_+_177026994.23-P1P2	B4GALT7_+_177026907.23-P1P2	predicted	predicted	GCGGGCGCGCCTCCCTCTCT	Gggcctcccaacaaatcact	B4GALT7_+_177026994.23-P1P2|B4GALT7_+_177026907.23-P1P2
B9D1	P1P2	B9D1_+_19266096.23-P1P2	B9D1_-_19266069.23-P1P2	predicted	predicted	GCTAAGGAGGGGTGGAGCCT	GAACGGGCGCCGTTATAAGG	B9D1_+_19266096.23-P1P2|B9D1_-_19266069.23-P1P2
B9D2	P1P2	B9D2_-_41870254.23-P1P2	B9D2_-_41870130.23-P1P2	predicted	predicted	GGAAGCTGCCATGTTGAGTG	GGGTGCTAGCCGTCTGCGGG	B9D2_-_41870254.23-P1P2|B9D2_-_41870130.23-P1P2
BAALC	P1P2	BAALC_-_104152832.23-P1P2	BAALC_-_104152828.23-P1P2	predicted	predicted	GGTCACGGAGCCCTGAGGGA	GGGCCGTCACGGAGCCCTGA	BAALC_-_104152832.23-P1P2|BAALC_-_104152828.23-P1P2
BAAT	P1	BAAT_+_104147712.23-P1	BAAT_+_104147756.23-P1	predicted	predicted	Gggaaaagaattgcattccc	Gctaaattcttcttgtagca	BAAT_+_104147712.23-P1|BAAT_+_104147756.23-P1
BAAT	P2	BAAT_+_104145991.23-P2	BAAT_+_104146061.23-P2	predicted	predicted	GGTAGTGGCAATCCCTAAGA	GTGCCCTAATGGTGCCAATA	BAAT_+_104145991.23-P2|BAAT_+_104146061.23-P2
BABAM1	P1P2	BABAM1_+_17378073.23-P1P2	BABAM1_+_17377929.23-P1P2	predicted	predicted	GGCGGGACCTGGAATGTGAT	GGTGGAGCTTGCAATGTGAT	BABAM1_+_17378073.23-P1P2|BABAM1_+_17377929.23-P1P2
BACE1	P1P2	BACE1_-_117187063.23-P1P2	BACE1_-_117187129.23-P1P2	predicted	predicted	GGCAGGCAATCCGGCTTCCG	GCTGCAAGGCCCTGGCGGGA	BACE1_-_117187063.23-P1P2|BACE1_-_117187129.23-P1P2
BACE2	P1P2	BACE2_-_42539648.23-P1P2	BACE2_+_42539927.23-P1P2	predicted	predicted	GGGGGCCGGGGCCCTAGTTC	GCAGCCCGCGCCGCCAAGTT	BACE2_-_42539648.23-P1P2|BACE2_+_42539927.23-P1P2
BACH1	P1P2	BACH1_+_30670991.23-P1P2	BACH1_-_30671070.23-P1P2	predicted	predicted	GCGGCCGGAAGCCCACGCGG	GTCGCTGACAGAGGCTTCGA	BACH1_+_30670991.23-P1P2|BACH1_-_30671070.23-P1P2
BACH2	P1P2	BACH2_-_91006719.23-P1P2	BACH2_-_91006758.23-P1P2	predicted	predicted	GCGCTGGGGCGCGGTACGCC	GTCCGCGAATGGCGCTCcgg	BACH2_-_91006719.23-P1P2|BACH2_-_91006758.23-P1P2
BAD	P1P2	BAD_+_64052316.23-P1P2	BAD_-_64052291.23-P1P2	predicted	predicted	GGAGCCCCGGGGCCGAAGGA	GcgcccccccgccggATCCA	BAD_+_64052316.23-P1P2|BAD_-_64052291.23-P1P2
BAG1	P1P2	BAG1_-_33264945.23-P1P2	BAG1_+_33264854.23-P1P2	predicted	predicted	GGAAGACCCGGCTGAAAATC	GGGGGCGGGGTGTTGGTAGA	BAG1_-_33264945.23-P1P2|BAG1_+_33264854.23-P1P2
BAG2	P1P2	BAG2_+_57036992.23-P1P2	BAG2_+_57037177.23-P1P2	predicted	predicted	GCCCACGCGAAGGTTCCTAT	GTGGGGAGCGCAAGTCTCTG	BAG2_+_57036992.23-P1P2|BAG2_+_57037177.23-P1P2
BAG3	P1P2	BAG3_-_121410786.23-P1P2	BAG3_-_121410700.23-P1P2	predicted	predicted	GCACGCGCACGAGTCGGAAG	GGGCCCCAGTCCAGCTCGTC	BAG3_-_121410786.23-P1P2|BAG3_-_121410700.23-P1P2
BAG4	P1P2	BAG4_+_38034213.23-P1P2	BAG4_-_38034252.23-P1P2	predicted	predicted	GCCCGAAAGCTGAGGGACGG	GCGGGGTTCGGCAGCAGAAG	BAG4_+_38034213.23-P1P2|BAG4_-_38034252.23-P1P2
BAG5	P1P2	BAG5_-_104029080.23-P1P2	BAG5_+_104029138.23-P1P2	predicted	predicted	GAACCCGGGGACACCTCCTC	GCCTTGGTCGCGGTCACTCC	BAG5_-_104029080.23-P1P2|BAG5_+_104029138.23-P1P2
BAG6	P1P2	BAG6_+_31620728.23-P1P2	BAG6_-_31620607.23-P1P2	predicted	predicted	GGGGCGCAGCGAGGGCAATA	GACTGCCTCGAGAGGGGCTA	BAG6_+_31620728.23-P1P2|BAG6_-_31620607.23-P1P2
BAGE	P1P2	BAGE_+_11098924.23-P1P2	BAGE_-_11098934.23-P1P2	predicted	predicted	Gcaggcctcacgccagttta	Ggataccagagaccctaaac	BAGE_+_11098924.23-P1P2|BAGE_-_11098934.23-P1P2
BAGE3	P1P2	BAGE3_+_11099138.23-P1P2	BAGE3_-_11098975.23-P1P2	predicted	predicted	Gttcgtggactacactttcc	Ggcacatggggttacgcgca	BAGE3_+_11099138.23-P1P2|BAGE3_-_11098975.23-P1P2
BAGE4	P1P2	BAGE4_+_11099138.23-P1P2	BAGE4_-_11098975.23-P1P2	predicted	predicted	Gttcgtggactacactttcc	Ggcacatggggttacgcgca	BAGE4_+_11099138.23-P1P2|BAGE4_-_11098975.23-P1P2
BAGE5	P1P2	BAGE5_+_11099138.23-P1P2	BAGE5_-_11098975.23-P1P2	predicted	predicted	Gttcgtggactacactttcc	Ggcacatggggttacgcgca	BAGE5_+_11099138.23-P1P2|BAGE5_-_11098975.23-P1P2
BAHCC1	P1P2	BAHCC1_-_79373059.23-P1P2	BAHCC1_-_79373047.23-P1P2	predicted	predicted	GGGACCCGCGGGGACGAGAA	GCCCTAGCTGCAGGGACCCG	BAHCC1_-_79373059.23-P1P2|BAHCC1_-_79373047.23-P1P2
BAHD1	P1P2	BAHD1_+_40731765.23-P1P2	BAHD1_-_40733033.23-P1P2	predicted	predicted	GTGGGCCCCAGGAACGCCTT	GGGGGAGCCGAGGGCCGGAT	BAHD1_+_40731765.23-P1P2|BAHD1_-_40733033.23-P1P2
BAI1	P1P2	BAI1_+_143530702.23-P1P2	BAI1_+_143530818.23-P1P2	predicted	predicted	GGGAGGGGAGCGAGATAAGG	GTGAAACTGGATCCCGAATC	BAI1_+_143530702.23-P1P2|BAI1_+_143530818.23-P1P2
BAI2	P1P2	BAI2_+_32230137.23-P1P2	BAI2_-_32230063.23-P1P2	predicted	predicted	GCTGGGCGGGGGCTTACCCA	GCGCGCCGCCTCCTGTTAAA	BAI2_+_32230137.23-P1P2|BAI2_-_32230063.23-P1P2
BAI3	P1P2	BAI3_-_69345064.23-P1P2	BAI3_+_69345126.23-P1P2	predicted	predicted	GCCGCAGCTGTGCATAAGAA	Gcggggggtgcgcgtgtccc	BAI3_-_69345064.23-P1P2|BAI3_+_69345126.23-P1P2
BAIAP2	P1P2	BAIAP2_-_79008790.23-P1P2	BAIAP2_-_79008779.23-P1P2	predicted	predicted	GAATGGAAAgggcggtgcgg	GCGGAACCCACCAATGGAAA	BAIAP2_-_79008790.23-P1P2|BAIAP2_-_79008779.23-P1P2
BAIAP2L1	P1P2	BAIAP2L1_+_98030603.23-P1P2	BAIAP2L1_-_98030594.23-P1P2	predicted	predicted	GGCCCTGTCCGCCACAGGTG	GGGAAGCGGGCCCCCCGAGT	BAIAP2L1_+_98030603.23-P1P2|BAIAP2L1_-_98030594.23-P1P2
BAIAP2L2	P1	BAIAP2L2_+_38485025.23-P1	BAIAP2L2_+_38485105.23-P1	predicted	predicted	GCTGCAGCAGGAGGGATCGA	GTCCCTGCCCCGCACGCCGT	BAIAP2L2_+_38485025.23-P1|BAIAP2L2_+_38485105.23-P1
BAIAP2L2	P2	BAIAP2L2_+_38506932.23-P2	BAIAP2L2_+_38506905.23-P2	predicted	predicted	GGGGCAGCGCCCGCCCAGTA	GAATGCCTGGTATAGGCAGG	BAIAP2L2_+_38506932.23-P2|BAIAP2L2_+_38506905.23-P2
BAIAP3	P1P2	BAIAP3_-_1383532.23-P1P2	BAIAP3_+_1383357.23-P1P2	predicted	predicted	GACCCCGGCCGGGTCCCCTA	GTGGCGCGTGGGGTCTAGAA	BAIAP3_-_1383532.23-P1P2|BAIAP3_+_1383357.23-P1P2
BAK1	P1P2	BAK1_-_33548176.23-P1P2	BAK1_-_33548092.23-P1P2	predicted	predicted	GCAGGCAGGGCGGCTGTCAG	GCACAGGCCGACAGCCTGTA	BAK1_-_33548176.23-P1P2|BAK1_-_33548092.23-P1P2
BAMBI	P1P2	BAMBI_-_28966182.23-P1P2	BAMBI_+_28966257.23-P1P2	predicted	predicted	GCTCCCCCGGCGCCTCGCGA	GCGAGCGGCGCCGGCGTCTG	BAMBI_-_28966182.23-P1P2|BAMBI_+_28966257.23-P1P2
BANF1	P1P2	BANF1_+_65769704.23-P1P2	BANF1_+_65769610.23-P1P2	predicted	predicted	GACCCGGAACTCAAGGACTT	GCGGAAGTACGGTTTTCGGA	BANF1_+_65769704.23-P1P2|BANF1_+_65769610.23-P1P2
BANF2	P1P2	BANF2_+_17680402.23-P1P2	BANF2_-_17680335.23-P1P2	predicted	predicted	GGGTTGCTGGGAAAGAGTGA	GCAGGTGAGAATAGGAACCG	BANF2_+_17680402.23-P1P2|BANF2_-_17680335.23-P1P2
BANK1	P1P2	BANK1_+_102711846.23-P1P2	BANK1_-_102711788.23-P1P2	predicted	predicted	GGCTCATGCCCGCAAGGCCA	GCAAAGCGGCCTTTTGAGAA	BANK1_+_102711846.23-P1P2|BANK1_-_102711788.23-P1P2
BANP	P1P2	BANP_+_87984935.23-P1P2	BANP_-_87984843.23-P1P2	predicted	predicted	GgggcACCCCTGTGGCAGTG	GGGCGTGGGCGAAAAACGGG	BANP_+_87984935.23-P1P2|BANP_-_87984843.23-P1P2
BAP1	P1P2	BAP1_-_52444153.23-P1P2	BAP1_-_52444125.23-P1P2	predicted	predicted	GCGCACGCGCGGAGGGACGG	GGATGCGGGCATGCGCTCGA	BAP1_-_52444153.23-P1P2|BAP1_-_52444125.23-P1P2
BARD1	P1P2	BARD1_-_215674553.23-P1P2	BARD1_-_215674547.23-P1P2	predicted	predicted	GTGGGCGGGACCTAGGGGTG	GGCCGAGTGGGCGGGACCTA	BARD1_-_215674553.23-P1P2|BARD1_-_215674547.23-P1P2
BARHL1	P1P2	BARHL1_+_135457880.23-P1P2	BARHL1_+_135457544.23-P1P2	predicted	predicted	GCCAAGTTGGGGAGAGCAAA	GGCGCCTCCCTGCTCCTCGG	BARHL1_+_135457880.23-P1P2|BARHL1_+_135457544.23-P1P2
BARHL2	P1P2	BARHL2_-_91183059.23-P1P2	BARHL2_-_91183282.23-P1P2	predicted	predicted	GAACGACTGCGCACGTGGCg	GCGCCCTCGGAACTCCCCCG	BARHL2_-_91183059.23-P1P2|BARHL2_-_91183282.23-P1P2
BARX1	P1P2	BARX1_-_96717789.23-P1P2	BARX1_-_96717826.23-P1P2	predicted	predicted	GGAAGGGAGGCCAAAAAGGA	GGCCGGCCGACCGAGACCGA	BARX1_-_96717789.23-P1P2|BARX1_-_96717826.23-P1P2
BARX2	P1P2	BARX2_-_129245208.23-P1P2	BARX2_-_129245374.23-P1P2	predicted	predicted	GTCCACGCGGGGAAGGAGAA	GAGGCAGTAAGGTGCTCATG	BARX2_-_129245208.23-P1P2|BARX2_-_129245374.23-P1P2
BASP1	P1P2	BASP1_-_17217520.23-P1P2	BASP1_-_17217490.23-P1P2	predicted	predicted	GAGGGTCTGCGCCggaggag	GCGGGCGTGTCCAGGCTGGA	BASP1_-_17217520.23-P1P2|BASP1_-_17217490.23-P1P2
BATF	P1P2	BATF_+_75988745.23-P1P2	BATF_-_75988398.23-P1P2	predicted	predicted	GACGCTGGAAGTCACATGGG	GGAGGCTGGCTGGACTTAAG	BATF_+_75988745.23-P1P2|BATF_-_75988398.23-P1P2
BATF2	P1P2	BATF2_-_64764683.23-P1P2	BATF2_-_64764623.23-P1P2	predicted	predicted	GGTATGAGGAGGGTGTTCTA	GGGGCCCCTTCTCTGGAAAG	BATF2_-_64764683.23-P1P2|BATF2_-_64764623.23-P1P2
BATF3	P1P2	BATF3_-_212873455.23-P1P2	BATF3_+_212873487.23-P1P2	predicted	predicted	GCTTCGTGGAAGTCACGTGG	GCCCGGGCGTCGCCTCGCGT	BATF3_-_212873455.23-P1P2|BATF3_+_212873487.23-P1P2
BAX	P1P2	BAX_+_49458010.23-P1P2	BAX_-_49457951.23-P1P2	predicted	predicted	GCCTGCCTCGCTCCCTCGGG	GTGGACGGACGGCTGTTGGA	BAX_+_49458010.23-P1P2|BAX_-_49457951.23-P1P2
BAZ1A	P1P2	BAZ1A_-_35344678.23-P1P2	BAZ1A_-_35344656.23-P1P2	predicted	predicted	GAAGAGACAGCGGAGAGCCT	GTACAGCCTGTCACTGATAC	BAZ1A_-_35344678.23-P1P2|BAZ1A_-_35344656.23-P1P2
BAZ1B	P1P2	BAZ1B_-_72936840.23-P1P2	BAZ1B_-_72936822.23-P1P2	predicted	predicted	GTAGGCGTGCGGGCCTCCGA	GTTATGTAAGCGCCCGTGAT	BAZ1B_-_72936840.23-P1P2|BAZ1B_-_72936822.23-P1P2
BAZ2A	P1	BAZ2A_+_57024211.23-P1	BAZ2A_+_57024197.23-P1	predicted	predicted	GCGGCGCTAGGACCCAGGTC	GAGGTCCGGGTCGGAAAGAT	BAZ2A_+_57024211.23-P1|BAZ2A_+_57024197.23-P1
BAZ2A	P2	BAZ2A_-_57030253.23-P2	BAZ2A_-_57030387.23-P2	predicted	predicted	GCAGACCAGGAGAAATATGG	GGAAGGACGTGAACATGTTG	BAZ2A_-_57030253.23-P2|BAZ2A_-_57030387.23-P2
BAZ2B	P1P2	BAZ2B_-_160472348.23-P1P2	BAZ2B_+_160472167.23-P1P2	predicted	predicted	GGCGGCCGGCACAAAGGCGG	GTCCCTGCCGGGGTAGTTTC	BAZ2B_-_160472348.23-P1P2|BAZ2B_+_160472167.23-P1P2
BBC3	P1P2	BBC3_-_47734727.23-P1P2	BBC3_+_47734613.23-P1P2	predicted	predicted	GGGGGAGATCGCCCAGACAC	GAACCCCCGGCGCGGAGGTA	BBC3_-_47734727.23-P1P2|BBC3_+_47734613.23-P1P2
BBIP1	P1P2	BBIP1_-_112679101.23-P1P2	BBIP1_-_112679111.23-P1P2	predicted	predicted	GCTAGCCAGAGGCGCCCAGT	GGCGCCCAGTGGGCGGGAGA	BBIP1_-_112679101.23-P1P2|BBIP1_-_112679111.23-P1P2
BBOX1	P1	BBOX1_+_27076817.23-P1	BBOX1_-_27076850.23-P1	predicted	predicted	GACTCAGCTGTCAGAGTCTG	GACAGCTGAGTGAATAGCAG	BBOX1_+_27076817.23-P1|BBOX1_-_27076850.23-P1
BBOX1	P2	BBOX1_+_27062796.23-P2	BBOX1_+_27062785.23-P2	predicted	predicted	GAAGGTGTAGCAACTACTGA	GACTACTGAAGGGAGCTTGG	BBOX1_+_27062796.23-P2|BBOX1_+_27062785.23-P2
BBS1	P1P2	BBS1_-_66277885.23-P1P2	BBS1_+_66277999.23-P1P2	predicted	predicted	GTGGAAGCCAGAGGGCTCTG	GCAGGCTCAGGAGGACGCGC	BBS1_-_66277885.23-P1P2|BBS1_+_66277999.23-P1P2
BBS10	P1P2	BBS10_-_76742240.23-P1P2	BBS10_+_76742649.23-P1P2	predicted	predicted	GAATAGGCGGGGAGAAAACC	GGTAAGGAGAGCAACTCGTG	BBS10_-_76742240.23-P1P2|BBS10_+_76742649.23-P1P2
BBS12	P1P2	BBS12_+_123653788.23-P1P2	BBS12_+_123653604.23-P1P2	predicted	predicted	GGGGACGTCACGCTATTGGT	GAGGTGACGCCGGGAGGTCC	BBS12_+_123653788.23-P1P2|BBS12_+_123653604.23-P1P2
BBS2	P1P2	BBS2_-_56554063.23-P1P2	BBS2_+_56554053.23-P1P2	predicted	predicted	GGCGCAGTGGAACCCCTGCT	GCGCACCCGCGGCCCAGCAG	BBS2_-_56554063.23-P1P2|BBS2_+_56554053.23-P1P2
BBS4	P1P2	BBS4_+_72978376.23-P1P2	BBS4_+_72978494.23-P1P2	predicted	predicted	GCCTCTGAAAGAGTCGGGGA	GGAGGCAAGCGGAAGTCGTA	BBS4_+_72978376.23-P1P2|BBS4_+_72978494.23-P1P2
BBS5	P1P2	BBS5_-_170335839.23-P1P2	BBS5_-_170335895.23-P1P2	predicted	predicted	GAGGTCAGGCACGCTCCCCT	GCCTGCCTCGCATCTCAAAT	BBS5_-_170335839.23-P1P2|BBS5_-_170335895.23-P1P2
BBS7	P1P2	BBS7_-_122791741.23-P1P2	BBS7_+_122791801.23-P1P2	predicted	predicted	GGACAGCGTGTTCCAATCAG	GGGAGCCAAGACTGCGTCTG	BBS7_-_122791741.23-P1P2|BBS7_+_122791801.23-P1P2
BBS9	P1P2	BBS9_-_33168882.23-P1P2	BBS9_+_33169116.23-P1P2	predicted	predicted	GCACACGCACCGAGGGGAGA	GCGTGCCGCGCCGACTTCTG	BBS9_-_33168882.23-P1P2|BBS9_+_33169116.23-P1P2
BBX	P1P2	BBX_-_107241455.23-P1P2	BBX_+_107241617.23-P1P2	predicted	predicted	GTCTTCCATGGGGCACCAAA	GTTCGGGACCTGTAGACAGT	BBX_-_107241455.23-P1P2|BBX_+_107241617.23-P1P2
BCAM	P1P2	BCAM_+_45312155.23-P1P2	BCAM_+_45312194.23-P1P2	predicted	predicted	GCCCAAGCCTAGAGCTGTCC	GCCTCCCAGTGCACGGGGCC	BCAM_+_45312155.23-P1P2|BCAM_+_45312194.23-P1P2
BCAN	P1P2	BCAN_+_156611696.23-P1P2	BCAN_+_156611788.23-P1P2	predicted	predicted	GTCAGCGGATGAGAAGCCGA	GGGGCTCTCGGGACGGTCAC	BCAN_+_156611696.23-P1P2|BCAN_+_156611788.23-P1P2
BCAP29	P1P2	BCAP29_+_107220602.23-P1P2	BCAP29_+_107220568.23-P1P2	predicted	predicted	GCCCGCCCGCGGGTCCGTCC	GGCGGCGCGACCACGTTTAT	BCAP29_+_107220602.23-P1P2|BCAP29_+_107220568.23-P1P2
BCAP31	P1P2	BCAP31_+_152989958.23-P1P2	BCAP31_-_152990165.23-P1P2	predicted	predicted	GGCGCCGGCCCTCCGCTCCG	GGGGCGAGAACGGGAGGTGG	BCAP31_+_152989958.23-P1P2|BCAP31_-_152990165.23-P1P2
BCAR1	P1	BCAR1_+_75285624.23-P1	BCAR1_-_75285637.23-P1	predicted	predicted	GCGCCCGCGCCCCCGACAGG	GCAAATAAGCCGCCTGTCGG	BCAR1_+_75285624.23-P1|BCAR1_-_75285637.23-P1
BCAR1	P2	BCAR1_+_75300093.23-P2	BCAR1_+_75300021.23-P2	predicted	predicted	GCCACAGGGCAGTGTAGTGT	GGCGAGGGATCGGCGAGGAG	BCAR1_+_75300093.23-P2|BCAR1_+_75300021.23-P2
BCAR3	P1	BCAR3_+_94147626.23-P1	BCAR3_+_94147518.23-P1	predicted	predicted	GGGAAGGAGTGGATTCGACG	GCTAAAATCCGGGCAGAGGA	BCAR3_+_94147626.23-P1|BCAR3_+_94147518.23-P1
BCAR3	P2	BCAR3_-_94312956.23-P2	BCAR3_-_94313001.23-P2	predicted	predicted	GGGGTCGCCGACCTTGTTGA	GAGCCTGCGGCTGGCGTTTG	BCAR3_-_94312956.23-P2|BCAR3_-_94313001.23-P2
BCAS1	ENST00000395961.3	BCAS1_+_52687306.23-ENST00000395961.3	BCAS1_+_52687284.23-ENST00000395961.3	predicted	predicted	GCGGCAGCCTCAGTAGGTGA	GGCACTGGGTAGAATACTTG	BCAS1_+_52687306.23-ENST00000395961.3|BCAS1_+_52687284.23-ENST00000395961.3
BCAS2	P1P2	BCAS2_+_115124454.23-P1P2	BCAS2_-_115124418.23-P1P2	predicted	predicted	GAAAAAGGGGCAGTAAGCAG	GCGGACGTGACGTAACGTCT	BCAS2_+_115124454.23-P1P2|BCAS2_-_115124418.23-P1P2
BCAS3	P1P2	BCAS3_+_58755081.23-P1P2	BCAS3_-_58755058.23-P1P2	predicted	predicted	GCAACCAGCAAGTAGGAAAG	GCCCTCCAGCCCCAGCGGAT	BCAS3_+_58755081.23-P1P2|BCAS3_-_58755058.23-P1P2
BCAS4	P1P2	BCAS4_-_49411439.23-P1P2	BCAS4_-_49411406.23-P1P2	predicted	predicted	GCGCGCCGCTCGCCACTGGG	GtgATGCCCAGGTGCTGCGG	BCAS4_-_49411439.23-P1P2|BCAS4_-_49411406.23-P1P2
BCAT1	P1P2	BCAT1_-_25102099.23-P1P2	BCAT1_-_25102126.23-P1P2	predicted	predicted	GCATCAGCAGGAAGACACTA	GCCCCCAGGCCGCCCCCAGA	BCAT1_-_25102099.23-P1P2|BCAT1_-_25102126.23-P1P2
BCAT2	P1P2	BCAT2_+_49314408.23-P1P2	BCAT2_-_49314481.23-P1P2	predicted	predicted	GTGCGCCCCGCAGCAGTGTC	GCGGTCCCTgccaggcgaag	BCAT2_+_49314408.23-P1P2|BCAT2_-_49314481.23-P1P2
BCCIP	P1P2	BCCIP_-_127512011.23-P1P2	BCCIP_-_127512094.23-P1P2	predicted	predicted	GGAATCCAGCAGGGGCATTG	GGGTCCGGAAGGTCAGGCAA	BCCIP_-_127512011.23-P1P2|BCCIP_-_127512094.23-P1P2
BCDIN3D	P1P2	BCDIN3D_-_50236972.23-P1P2	BCDIN3D_-_50236966.23-P1P2	predicted	predicted	GCGCGTGCGTCGAACGGCTA	GCCAGCGCGCGTGCGTCGAA	BCDIN3D_-_50236972.23-P1P2|BCDIN3D_-_50236966.23-P1P2
BCHE	P1P2	BCHE_-_165555298.23-P1P2	BCHE_-_165555270.23-P1P2	predicted	predicted	GCAACTTGAAATCTGTTCAG	GTGACAAAGCTCGCGAGAGT	BCHE_-_165555298.23-P1P2|BCHE_-_165555270.23-P1P2
BCKDHA	P1	BCKDHA_+_41903440.23-P1	BCKDHA_-_41903405.23-P1	predicted	predicted	GGTAAAGCGGATCAATGCCA	GCAGTCCCACCTCCTAACTC	BCKDHA_+_41903440.23-P1|BCKDHA_-_41903405.23-P1
BCKDHA	P2	BCKDHA_+_41882204.23-P2	BCKDHA_-_41882420.23-P2	predicted	predicted	Gaaactggcaagccgaggtt	GGAAGGCCCTGGAGAATCCG	BCKDHA_+_41882204.23-P2|BCKDHA_-_41882420.23-P2
BCKDHB	P1P2	BCKDHB_+_80816243.23-P1P2	BCKDHB_+_80816264.23-P1P2	predicted	predicted	GGGAAGGCGACGTGACGAGC	GGAACTGGAAATTTAGGGGC	BCKDHB_+_80816243.23-P1P2|BCKDHB_+_80816264.23-P1P2
BCKDK	P1P2	BCKDK_+_31119819.23-P1P2	BCKDK_-_31119583.23-P1P2	predicted	predicted	GGGGCCTCCGCGGACTGAGT	GAGCCTCGAGAGCCGTGTGG	BCKDK_+_31119819.23-P1P2|BCKDK_-_31119583.23-P1P2
BCL10	P1P2	BCL10_+_85742283.23-P1P2	BCL10_+_85742287.23-P1P2	predicted	predicted	GTGAGCCTCTACGAGAGGGA	GCGCCTGAGCCTCTACGAGA	BCL10_+_85742283.23-P1P2|BCL10_+_85742287.23-P1P2
BCL11A	P1P2	BCL11A_-_60780918.23-P1P2	BCL11A_+_60780940.23-P1P2	predicted	predicted	GCCAATGGCCAGTGCGGGGA	Ggggccgcgtctggcgtccg	BCL11A_-_60780918.23-P1P2|BCL11A_+_60780940.23-P1P2
BCL11B	P1P2	BCL11B_+_99738310.23-P1P2	BCL11B_-_99738531.23-P1P2	predicted	predicted	GCCTGCCAGGTGAACTGGGA	GGGAGCTCTCGGTCTCTCTA	BCL11B_+_99738310.23-P1P2|BCL11B_-_99738531.23-P1P2
BCL2	P1P2	BCL2_+_60987422.23-P1P2	BCL2_-_60987579.23-P1P2	predicted	predicted	GTACGCACAGGAAACCGGTC	GGAGTGGCGCGTCCCGCCGG	BCL2_+_60987422.23-P1P2|BCL2_-_60987579.23-P1P2
BCL2A1	P1P2	BCL2A1_+_80263619.23-P1P2	BCL2A1_-_80263576.23-P1P2	predicted	predicted	GCCTACGCACGAAAGTGACT	GGACACATGATGATACATGG	BCL2A1_+_80263619.23-P1P2|BCL2A1_-_80263576.23-P1P2
BCL2L1	P1	BCL2L1_+_30310660.23-P1	BCL2L1_-_30310526.23-P1	predicted	predicted	GGAGCGGCCGCCCTCGATCC	GGGGATGCCGGTAACTCAGC	BCL2L1_+_30310660.23-P1|BCL2L1_-_30310526.23-P1
BCL2L1	P2	BCL2L1_-_30311859.23-P2	BCL2L1_-_30311828.23-P2	predicted	predicted	GCCCCCTCGCGGTAGATCTG	GAGTGACTGGCATCAGGACC	BCL2L1_-_30311859.23-P2|BCL2L1_-_30311828.23-P2
BCL2L10	P1P2	BCL2L10_-_52404852.23-P1P2	BCL2L10_+_52404981.23-P1P2	predicted	predicted	GGCGCAGTACCCCAGGTAGT	GcACGGCAGCCCTACCCTGG	BCL2L10_-_52404852.23-P1P2|BCL2L10_+_52404981.23-P1P2
BCL2L11	P1	BCL2L11_-_111878356.23-P1	BCL2L11_+_111878318.23-P1	predicted	predicted	GCCGAGCCTGCAcgcgccgg	GCTCGGACAGGTAAAGGCGG	BCL2L11_-_111878356.23-P1|BCL2L11_+_111878318.23-P1
BCL2L11	P2	BCL2L11_-_111880135.23-P2	BCL2L11_+_111880128.23-P2	predicted	predicted	GCGACCGCGCGCGGACCAAT	GgGGTGCCCGCGTTCCCAAT	BCL2L11_-_111880135.23-P2|BCL2L11_+_111880128.23-P2
BCL2L12	P1P2	BCL2L12_+_50169115.23-P1P2	BCL2L12_+_50169108.23-P1P2	predicted	predicted	GTGGCCGGAAACCCAAAAAA	GAAACCCAAAAAAGGGCATA	BCL2L12_+_50169115.23-P1P2|BCL2L12_+_50169108.23-P1P2
BCL2L13	P1P2	BCL2L13_-_18121418.23-P1P2	BCL2L13_+_18121287.23-P1P2	predicted	predicted	GCTGGACGGAGAGACCTCCG	GGAGGGGTTGGGATTCTGAC	BCL2L13_-_18121418.23-P1P2|BCL2L13_+_18121287.23-P1P2
BCL2L14	P1	BCL2L14_-_12223849.23-P1	BCL2L14_-_12223662.23-P1	predicted	predicted	GCCAGGGGCAGGGCGTAATA	Ggtacctgtaccatgttagg	BCL2L14_-_12223849.23-P1|BCL2L14_-_12223662.23-P1
BCL2L14	P2	BCL2L14_+_12202721.23-P2	BCL2L14_+_12202694.23-P2	predicted	predicted	GGTGTAGAACGGTGTTTCTA	GTATTTCTAGAATTCCGCCT	BCL2L14_+_12202721.23-P2|BCL2L14_+_12202694.23-P2
BCL2L15	P1P2	BCL2L15_+_114430352.23-P1P2	BCL2L15_+_114430414.23-P1P2	predicted	predicted	GTGCAGGACCTAAGAAGTCG	GATAAACAGAAGTTGAACGC	BCL2L15_+_114430352.23-P1P2|BCL2L15_+_114430414.23-P1P2
BCL2L2	P1P2	BCL2L2_+_23775844.23-P1P2	BCL2L2_+_23775897.23-P1P2	predicted	predicted	GCTGGCTGAGAGGGCACGGt	GCTGCAAAGGGCCACTACTC	BCL2L2_+_23775844.23-P1P2|BCL2L2_+_23775897.23-P1P2
BCL2L2-PABPN1	P1P2	BCL2L2-PABPN1_+_23775897.23-P1P2	BCL2L2-PABPN1_+_23775844.23-P1P2	predicted	predicted	GCTGCAAAGGGCCACTACTC	GCTGGCTGAGAGGGCACGGt	BCL2L2-PABPN1_+_23775897.23-P1P2|BCL2L2-PABPN1_+_23775844.23-P1P2
BCL3	P1P2	BCL3_+_45251864.23-P1P2	BCL3_-_45251894.23-P1P2	predicted	predicted	GggccACCCGTACGCCCCAG	GCGTACGGGTggccccgggg	BCL3_+_45251864.23-P1P2|BCL3_-_45251894.23-P1P2
BCL6	P1P2	BCL6_+_187463453.23-P1P2	BCL6_+_187463473.23-P1P2	predicted	predicted	GGGCCCCTCGAGCCTCGAAC	GGGGAGGGAGAGCCACCTTC	BCL6_+_187463453.23-P1P2|BCL6_+_187463473.23-P1P2
BCL6B	P1P2	BCL6B_+_6926206.23-P1P2	BCL6B_+_6926188.23-P1P2	predicted	predicted	GGGGCGGGACCTCAGAAACA	GAAGGGGTGGTCGTAACGTA	BCL6B_+_6926206.23-P1P2|BCL6B_+_6926188.23-P1P2
BCL7A	P1P2	BCL7A_+_122459554.23-P1P2	BCL7A_+_122459529.23-P1P2	predicted	predicted	GCGCGCTGACCCTTCCTCGG	GCAGGTGCCGAGGGGTCCAT	BCL7A_+_122459554.23-P1P2|BCL7A_+_122459529.23-P1P2
BCL7B	P1P2	BCL7B_+_72972115.23-P1P2	BCL7B_+_72972146.23-P1P2	predicted	predicted	GGACTCCCGGGGCACTCAGG	GTCGCACCCCGGCCCGGGTA	BCL7B_+_72972115.23-P1P2|BCL7B_+_72972146.23-P1P2
BCL7C	P1P2	BCL7C_+_30905400.23-P1P2	BCL7C_-_30905621.23-P1P2	predicted	predicted	GgggACTTGCGGAGGCGTTG	GCGGACGCGCGAGTTGGGGA	BCL7C_+_30905400.23-P1P2|BCL7C_-_30905621.23-P1P2
BCL9	P1P2	BCL9_-_147013037.23-P1P2	BCL9_+_147013219.23-P1P2	predicted	predicted	GCTGCGAGCCTGCCTGTCAC	GGCTGCGGTGACACTTGGTA	BCL9_-_147013037.23-P1P2|BCL9_+_147013219.23-P1P2
BCLAF1	P1P2	BCLAF1_-_136611126.23-P1P2	BCLAF1_-_136611049.23-P1P2	predicted	predicted	GGTCTCGCGGGAAGATGTGA	GCCACCCTTCCGCTCCGGTC	BCLAF1_-_136611126.23-P1P2|BCLAF1_-_136611049.23-P1P2
BCMO1	P1P2	BCMO1_+_81272020.23-P1P2	BCMO1_-_81272085.23-P1P2	predicted	predicted	GAAGAGATGCTGGGAATCAG	GCCAGCTCTTGGATTACGTC	BCMO1_+_81272020.23-P1P2|BCMO1_-_81272085.23-P1P2
BCO2	P1P2	BCO2_+_112046179.23-P1P2	BCO2_-_112046064.23-P1P2	predicted	predicted	GAGGACGCAGCTTAAGGGGC	GTTAACTGTAGTGTGAGAAC	BCO2_+_112046179.23-P1P2|BCO2_-_112046064.23-P1P2
BCOR	P1P2	BCOR_-_39957251.23-P1P2	BCOR_+_39957316.23-P1P2	predicted	predicted	GCCAACGCGTcccccctccc	GAGGGGAGGCGGCTGTTggg	BCOR_-_39957251.23-P1P2|BCOR_+_39957316.23-P1P2
BCORL1	P1P2	BCORL1_+_129116278.23-P1P2	BCORL1_+_129116444.23-P1P2	predicted	predicted	GGACCGAGCGGATTCCGGAG	GAATGCGGCCTACGCgggtg	BCORL1_+_129116278.23-P1P2|BCORL1_+_129116444.23-P1P2
BCR	P1P2	BCR_-_23522264.23-P1P2	BCR_-_23522198.23-P1P2	predicted	predicted	GGGGGGGAGGTTGCTTCTGT	GGGCCTCTGACACGACGACT	BCR_-_23522264.23-P1P2|BCR_-_23522198.23-P1P2
BCS1L	P1P2	BCS1L_+_219524306.23-P1P2	BCS1L_+_219524227.23-P1P2	predicted	predicted	GGCTCTCGATGGTGCTTCTC	GTACCCCGGCAGCCGGCAAG	BCS1L_+_219524306.23-P1P2|BCS1L_+_219524227.23-P1P2
BDH1	P1	BDH1_+_197283019.23-P1	BDH1_-_197283102.23-P1	predicted	predicted	GCGGTCGGGGAGCGAGAAGG	GGAAAGGGTTGCAGCCTCGC	BDH1_+_197283019.23-P1|BDH1_-_197283102.23-P1
BDH1	P2	BDH1_+_197300357.23-P2	BDH1_-_197300250.23-P2	predicted	predicted	GTGATCCTCTGCTTGTCAGA	GTGTGTGACAAGTACAGTGG	BDH1_+_197300357.23-P2|BDH1_-_197300250.23-P2
BDH2	P1P2	BDH2_-_104021127.23-P1P2	BDH2_-_104021277.23-P1P2	predicted	predicted	GCTGCCATCTAGTGGAATTC	GGTGCCAGGGTAGACGAGAT	BDH2_-_104021127.23-P1P2|BDH2_-_104021277.23-P1P2
BDKRB1	P1P2	BDKRB1_-_96722370.23-P1P2	BDKRB1_+_96722313.23-P1P2	predicted	predicted	GGCAGATGGTACCAAAGTAA	GCTGCCCAAGACCTGTATGT	BDKRB1_-_96722370.23-P1P2|BDKRB1_+_96722313.23-P1P2
BDKRB2	P1P2	BDKRB2_+_96671035.23-P1P2	BDKRB2_+_96670894.23-P1P2	predicted	predicted	GTGTGGGGCCGGGAAGGCTG	GCTCCCGGCTGACCACAAAG	BDKRB2_+_96671035.23-P1P2|BDKRB2_+_96670894.23-P1P2
BDNF	P1P2	BDNF_-_27722182.23-P1P2	BDNF_-_27722210.23-P1P2	predicted	predicted	GTCCTCGCGCGGGGAACCGA	GGGAACTCCCCGCTCCCCCG	BDNF_-_27722182.23-P1P2|BDNF_-_27722210.23-P1P2
BDP1	P1P2	BDP1_+_70751390.23-P1P2	BDP1_+_70751346.23-P1P2	predicted	predicted	GGACGTCAGACGCACAGCAC	GACTGAGACTGGGTTACCTG	BDP1_+_70751390.23-P1P2|BDP1_+_70751346.23-P1P2
BEAN1	P1P2	BEAN1_-_66461016.23-P1P2	BEAN1_+_66460890.23-P1P2	predicted	predicted	Ggcggcgcggggacgacggg	GgTCACTCCGAGATgcgggg	BEAN1_-_66461016.23-P1P2|BEAN1_+_66460890.23-P1P2
BECN1	P1P2	BECN1_+_40976459.23-P1P2	BECN1_-_40976472.23-P1P2	predicted	predicted	GGGAGCCTCCCCATTCTCTG	GAGCCAAGGCCGCAGAGAAT	BECN1_+_40976459.23-P1P2|BECN1_-_40976472.23-P1P2
BEGAIN	P1	BEGAIN_-_101053861.23-P1	BEGAIN_-_101053961.23-P1	predicted	predicted	GcggccggggcgcAAGTGGT	GGAACCCGCGCCAGCTTGAA	BEGAIN_-_101053861.23-P1|BEGAIN_-_101053961.23-P1
BEGAIN	P2	BEGAIN_+_101014503.23-P2	BEGAIN_-_101014693.23-P2	predicted	predicted	GCCCGGAGGCAGACCCACGT	GGGGACTCCTATGCCATCCT	BEGAIN_+_101014503.23-P2|BEGAIN_-_101014693.23-P2
BEND2	P1P2	BEND2_+_18239105.23-P1P2	BEND2_+_18239451.23-P1P2	predicted	predicted	GTAAGAAAGTAGGTCAAAAG	GAGGCCATCGAGGTGTGCGA	BEND2_+_18239105.23-P1P2|BEND2_+_18239451.23-P1P2
BEND3	P1P2	BEND3_+_107436793.23-P1P2	BEND3_-_107436684.23-P1P2	predicted	predicted	GGTACAGGGGACATTGTTcg	GAGCTCGGGCGCGCACTCCC	BEND3_+_107436793.23-P1P2|BEND3_-_107436684.23-P1P2
BEND4	P1P2	BEND4_+_42154510.23-P1P2	BEND4_-_42154502.23-P1P2	predicted	predicted	GTTCCCCCGCTCCCCGTCGG	GgcccgcggggTCTGCCTGG	BEND4_+_42154510.23-P1P2|BEND4_-_42154502.23-P1P2
BEND5	P1P2	BEND5_-_49242747.23-P1P2	BEND5_-_49242706.23-P1P2	predicted	predicted	GGACGAGGGGCGGATGAGGG	GTTCGCCTGGGCGCGGAAAA	BEND5_-_49242747.23-P1P2|BEND5_-_49242706.23-P1P2
BEND6	P1P2	BEND6_-_56819576.23-P1P2	BEND6_+_56819776.23-P1P2	predicted	predicted	GGCGCTACGCGAGTGATCCA	GGGGATGCTGAGGTCGGCGG	BEND6_-_56819576.23-P1P2|BEND6_+_56819776.23-P1P2
BEND7	P1P2	BEND7_-_13571137.23-P1P2	BEND7_+_13571119.23-P1P2	predicted	predicted	Gcggccgccgccatccccgg	Gcggcccccggggatggcgg	BEND7_-_13571137.23-P1P2|BEND7_+_13571119.23-P1P2
BEST1	P1	BEST1_+_61717511.23-P1	BEST1_-_61717767.23-P1	predicted	predicted	GGCCTTGCAGAGAGAGTTGG	GTTAGGGAGTCAAGTGACGG	BEST1_+_61717511.23-P1|BEST1_-_61717767.23-P1
BEST1	P2	BEST1_+_61722529.23-P2	BEST1_+_61722485.23-P2	predicted	predicted	GTGTGGACGCAGCGAGGAGA	GCCCGGCCCTGGGTAGGAGT	BEST1_+_61722529.23-P2|BEST1_+_61722485.23-P2
BEST2	P1P2	BEST2_-_12862429.23-P1P2	BEST2_+_12862402.23-P1P2	predicted	predicted	GGACCTGCCAGTGAGCGACT	GCGCTCACTGGCAGGTCCTA	BEST2_-_12862429.23-P1P2|BEST2_+_12862402.23-P1P2
BEST3	P1P2	BEST3_-_70093399.23-P1P2	BEST3_-_70093325.23-P1P2	predicted	predicted	GCCCTGGGATCAAGGAAGAA	GACCCCTTTGAATGAGAAGT	BEST3_-_70093399.23-P1P2|BEST3_-_70093325.23-P1P2
BEST4	P1P2	BEST4_+_45253936.23-P1P2	BEST4_+_45253976.23-P1P2	predicted	predicted	GTCCCAGCACCAGGGGAAGC	GGGCCAGCCCAACCCTACAG	BEST4_+_45253936.23-P1P2|BEST4_+_45253976.23-P1P2
BET1	P1P2	BET1_-_93633835.23-P1P2	BET1_+_93633872.23-P1P2	predicted	predicted	GACGGGGCGTCCGGAAAAGG	GAGCGGAACAGCGGGAACGT	BET1_-_93633835.23-P1P2|BET1_+_93633872.23-P1P2
BET1L	P1P2	BET1L_-_207553.23-P1P2	BET1L_+_207452.23-P1P2	predicted	predicted	GGAAGCGATGGGCATATCTG	GAAGGGGCTGGGCTATCTAG	BET1L_-_207553.23-P1P2|BET1L_+_207452.23-P1P2
BEX1	P1P2	BEX1_-_102319216.23-P1P2	BEX1_+_102319189.23-P1P2	predicted	predicted	GGGGCCGGCGGCCAGTTAAC	GAACTGGCCGCCGGCCCGTG	BEX1_-_102319216.23-P1P2|BEX1_+_102319189.23-P1P2
BEX2	P1P2	BEX2_+_102566020.23-P1P2	BEX2_+_102566026.23-P1P2	predicted	predicted	GGGGACTCCCGGTGAGGATG	GTTAAAAGGGACTCCCGGTG	BEX2_+_102566020.23-P1P2|BEX2_+_102566026.23-P1P2
BEX4	P1P2	BEX4_-_102469933.23-P1P2	BEX4_-_102469961.23-P1P2	predicted	predicted	GAGACTCCGGATGAGGATAG	GCGAAAGCCCCGCCTGACTC	BEX4_-_102469933.23-P1P2|BEX4_-_102469961.23-P1P2
BEX5	P1P2	BEX5_+_101411018.23-P1P2	BEX5_-_101411053.23-P1P2	predicted	predicted	GTGCGGGTGTGAATGGTAAT	GCACCCGCAGTGCGGCAGGA	BEX5_+_101411018.23-P1P2|BEX5_-_101411053.23-P1P2
BFAR	P1P2	BFAR_-_14726624.23-P1P2	BFAR_+_14726651.23-P1P2	predicted	predicted	GGTCTCTGGGTGAAGAGGAA	GACTCCCAGCCGGAGGAAGT	BFAR_-_14726624.23-P1P2|BFAR_+_14726651.23-P1P2
BFSP1	P1	BFSP1_-_17539533.23-P1	BFSP1_-_17539634.23-P1	predicted	predicted	GACTCACTGGCTCAAGGGGT	GGGACCACCTCTTAATGACT	BFSP1_-_17539533.23-P1|BFSP1_-_17539634.23-P1
BFSP1	P2	BFSP1_+_17512179.23-P2	BFSP1_-_17512194.23-P2	predicted	predicted	GTCCAACCCCGGAGCTGTAT	GTAGCGGCCCATACAGCTCC	BFSP1_+_17512179.23-P2|BFSP1_-_17512194.23-P2
BFSP2	P1P2	BFSP2_+_133118807.23-P1P2	BFSP2_-_133118820.23-P1P2	predicted	predicted	GGGAATCTCCCCTATCCCTG	GCAAAGCAGCCCCAGGGATA	BFSP2_+_133118807.23-P1P2|BFSP2_-_133118820.23-P1P2
BGLAP	P1P2	BGLAP_+_156182642.23-P1P2	BGLAP_+_156182654.23-P1P2	predicted	predicted	GGAGGCTGAGGGCAGCGGGG	GGGGAAGTCATCGGAGGCTG	BGLAP_+_156182642.23-P1P2|BGLAP_+_156182654.23-P1P2
BGN	P1P2	BGN_+_152760266.23-P1P2	BGN_+_152760165.23-P1P2	predicted	predicted	GCCCCCCTGGCAGCTTCAAA	GGGGGCAGACAGCAAAGGAA	BGN_+_152760266.23-P1P2|BGN_+_152760165.23-P1P2
BHLHA15	P1P2	BHLHA15_-_97840501.23-P1P2	BHLHA15_-_97840602.23-P1P2	predicted	predicted	Gctgtcttgggggacgaggg	GGCTGCGCGGCCACCTGGTC	BHLHA15_-_97840501.23-P1P2|BHLHA15_-_97840602.23-P1P2
BHLHA9	P1P2	BHLHA9_-_1173539.23-P1P2	BHLHA9_-_1173552.23-P1P2	predicted	predicted	GAGGCAGGGCAAGGTCCCCG	GTCCCCGGGGCAGCGTGGCC	BHLHA9_-_1173539.23-P1P2|BHLHA9_-_1173552.23-P1P2
BHLHB9	P1P2	BHLHB9_-_101975621.23-P1P2	BHLHB9_+_101975562.23-P1P2	predicted	predicted	GGTCACGTGGGGCTGACGGT	GTCGCCGCAGTCCTGTACCA	BHLHB9_-_101975621.23-P1P2|BHLHB9_+_101975562.23-P1P2
BHLHE22	P1P2	BHLHE22_-_65492647.23-P1P2	BHLHE22_+_65492508.23-P1P2	predicted	predicted	GCAAGCTAAAGGCAGTTGTT	GGCGAAGCCTGGGAGTCCTG	BHLHE22_-_65492647.23-P1P2|BHLHE22_+_65492508.23-P1P2
BHLHE23	P1P2	BHLHE23_-_61638475.23-P1P2	BHLHE23_+_61638646.23-P1P2	predicted	predicted	GGGTGGGGGCTCTGGACCGA	GTGGCCCCTGCGTGTCGCCA	BHLHE23_-_61638475.23-P1P2|BHLHE23_+_61638646.23-P1P2
BHLHE40	P1P2	BHLHE40_-_5020486.23-P1P2	BHLHE40_+_5020499.23-P1P2	predicted	predicted	GAAAGAAACCCCAGCCTCTG	GCGCTGCGGAGGGAGTCGCC	BHLHE40_-_5020486.23-P1P2|BHLHE40_+_5020499.23-P1P2
BHLHE41	P1P2	BHLHE41_-_26278099.23-P1P2	BHLHE41_-_26278125.23-P1P2	predicted	predicted	Gcgggggcgtcgggagaagg	Gagaaggcgaacggcaggag	BHLHE41_-_26278099.23-P1P2|BHLHE41_-_26278125.23-P1P2
BHMT	P1P2	BHMT_-_78407611.23-P1P2	BHMT_-_78407510.23-P1P2	predicted	predicted	GCCCAACTGCGGGTATAAAG	GCCAGGTTCCCAACAGGAGG	BHMT_-_78407611.23-P1P2|BHMT_-_78407510.23-P1P2
BHMT2	P1P2	BHMT2_-_78365455.23-P1P2	BHMT2_+_78365413.23-P1P2	predicted	predicted	GACGGAGCATGACTAGGCCG	GTCCCGGCGCGCAGCTGCTG	BHMT2_-_78365455.23-P1P2|BHMT2_+_78365413.23-P1P2
BICC1	P1P2	BICC1_-_60272471.23-P1P2	BICC1_-_60272569.23-P1P2	predicted	predicted	GGAAAGTGGCAGTGTGTACG	GAATGAGCGCGCGGCTGTAG	BICC1_-_60272471.23-P1P2|BICC1_-_60272569.23-P1P2
BICD1	P1P2	BICD1_-_32259667.23-P1P2	BICD1_+_32259584.23-P1P2	predicted	predicted	GcgcccggcgggAGGCGCCT	GGAGGCGCAGGCGACGGGTC	BICD1_-_32259667.23-P1P2|BICD1_+_32259584.23-P1P2
BICD2	P1P2	BICD2_-_95527321.23-P1P2	BICD2_+_95527260.23-P1P2	predicted	predicted	GGACGCCAATGTGGCCCAGG	GCCCGCCCCTCACAGAGCAT	BICD2_-_95527321.23-P1P2|BICD2_+_95527260.23-P1P2
BID	P1P2	BID_-_18257390.23-P1P2	BID_+_18257302.23-P1P2	predicted	predicted	GCGGCAGCGCAGTGAGAACC	GGGTCCCCGCAAGCCGCCGg	BID_-_18257390.23-P1P2|BID_+_18257302.23-P1P2
BIK	P1P2	BIK_+_43506639.23-P1P2	BIK_-_43506537.23-P1P2	predicted	predicted	GCACCCCGAGCGCGGAATCC	GAGGGGAAACAGCGACGCAC	BIK_+_43506639.23-P1P2|BIK_-_43506537.23-P1P2
BIN1	P1P2	BIN1_-_127864854.23-P1P2	BIN1_-_127864927.23-P1P2	predicted	predicted	GACCGCCAGGTCCGCGAGGA	GCAGCTGCACCGCCCCGGGG	BIN1_-_127864854.23-P1P2|BIN1_-_127864927.23-P1P2
BIN2	P1P2	BIN2_+_51718086.23-P1P2	BIN2_+_51717943.23-P1P2	predicted	predicted	GGCTGCCTGAGGGTAGGCCC	GAGCCCGCACTTCCTCCTCG	BIN2_+_51718086.23-P1P2|BIN2_+_51717943.23-P1P2
BIN3	P1P2	BIN3_-_22526693.23-P1P2	BIN3_+_22526712.23-P1P2	predicted	predicted	GCCCGGAAGAGGCGGTTGGG	GCGAGCACGCAGCAGCAGAA	BIN3_-_22526693.23-P1P2|BIN3_+_22526712.23-P1P2
BIRC2	P1P2	BIRC2_+_102217868.23-P1P2	BIRC2_+_102217815.23-P1P2	predicted	predicted	GGGAGGCTGGGGCCGGAAAG	GAACCTCCGGGAAAGACGCT	BIRC2_+_102217868.23-P1P2|BIRC2_+_102217815.23-P1P2
BIRC3	P1P2	BIRC3_-_102188162.23-P1P2	BIRC3_-_102188055.23-P1P2	predicted	predicted	GGGAACGCCTGGTACAGATA	GTGCCAGGCCACTGATTAAG	BIRC3_-_102188162.23-P1P2|BIRC3_-_102188055.23-P1P2
BIRC5	P1P2	BIRC5_-_76210173.23-P1P2	BIRC5_-_76210230.23-P1P2	predicted	predicted	GGGGGCGCTAGGTGTGGGCA	GCACGGGCAGAGCCACGCGG	BIRC5_-_76210173.23-P1P2|BIRC5_-_76210230.23-P1P2
BIRC6	P1P2	BIRC6_+_32582126.23-P1P2	BIRC6_+_32582122.23-P1P2	predicted	predicted	GCCGGAGGGGCCAAACTCGG	GAGGGGCCAAACTCGGAGGG	BIRC6_+_32582126.23-P1P2|BIRC6_+_32582122.23-P1P2
BIRC7	P1P2	BIRC7_+_61866938.23-P1P2	BIRC7_+_61867006.23-P1P2	predicted	predicted	GGTGACCTCCCACCTTGCGG	GCAGCCTCCGGAAGCAGAGA	BIRC7_+_61866938.23-P1P2|BIRC7_+_61867006.23-P1P2
BIRC8	P1P2	BIRC8_+_53794715.23-P1P2	BIRC8_-_53794966.23-P1P2	predicted	predicted	GAAGAACGAGACACGGGCGT	Gtatctgttcgggcacattg	BIRC8_+_53794715.23-P1P2|BIRC8_-_53794966.23-P1P2
BIVM	P1	BIVM_-_103451364.23-P1	BIVM_-_103451228.23-P1	predicted	predicted	GAGGTTCCAGCCAAGGTGTA	GCCCCGGCGCGCCCAGGTGA	BIVM_-_103451364.23-P1|BIVM_-_103451228.23-P1
BIVM	P2	BIVM_+_103452600.23-P2	BIVM_+_103452560.23-P2	predicted	predicted	GGGACGCTGTTGGTGTTAAA	GGCATCCGGGCTAAGAGCTG	BIVM_+_103452600.23-P2|BIVM_+_103452560.23-P2
BIVM-ERCC5	ENST00000602836.1	BIVM-ERCC5_+_103459487.23-ENST00000602836.1	BIVM-ERCC5_+_103459483.23-ENST00000602836.1	predicted	predicted	GTGCAAAATGAGCTCCTAAG	GAAATGAGCTCCTAAGAGGA	BIVM-ERCC5_+_103459487.23-ENST00000602836.1|BIVM-ERCC5_+_103459483.23-ENST00000602836.1
BLCAP	P1P2	BLCAP_+_36156294.23-P1P2	BLCAP_+_36156519.23-P1P2	predicted	predicted	GGGCTCGACTAGAAGACTAA	GAGGGGACCCGGCCGCGCTT	BLCAP_+_36156294.23-P1P2|BLCAP_+_36156519.23-P1P2
BLID	ENST00000560104.1	BLID_-_121987282.23-ENST00000560104.1	BLID_+_121987103.23-ENST00000560104.1	predicted	predicted	GCCTCGCCATGGCAGACCAC	GCTTAGGTCTGTTCACAGTA	BLID_-_121987282.23-ENST00000560104.1|BLID_+_121987103.23-ENST00000560104.1
BLK	P1P2	BLK_-_11351831.23-P1P2	BLK_+_11351719.23-P1P2	predicted	predicted	GGCCCACAGGAGCTTCAGAA	GTCCCTGGCCCTGGGCAACG	BLK_-_11351831.23-P1P2|BLK_+_11351719.23-P1P2
BLM	P1P2	BLM_+_91260462.23-P1P2	BLM_+_91260402.23-P1P2	predicted	predicted	GCGGGGTCGCCGTACAGCGC	GCGGGAGGGTCAGATGACTA	BLM_+_91260462.23-P1P2|BLM_+_91260402.23-P1P2
BLMH	P1P2	BLMH_-_28619147.23-P1P2	BLMH_+_28619220.23-P1P2	predicted	predicted	GTGGGTCCGCCAGCGCCCGG	GCCCGGAGGCGGGAACCTAG	BLMH_-_28619147.23-P1P2|BLMH_+_28619220.23-P1P2
BLNK	P1P2	BLNK_-_98031593.23-P1P2	BLNK_+_98031620.23-P1P2	predicted	predicted	GCTATAACTGGGAACTTCCT	GTCTCCAAGAGAGGTTCAGA	BLNK_-_98031593.23-P1P2|BLNK_+_98031620.23-P1P2
BLOC1S1	P1P2	BLOC1S1_+_56109768.23-P1P2	BLOC1S1_+_56109738.23-P1P2	predicted	predicted	GAGACCTTGGGTGAAGATCT	GAGAGGTAGAGGGTTGCGGA	BLOC1S1_+_56109768.23-P1P2|BLOC1S1_+_56109738.23-P1P2
BLOC1S2	P1P2	BLOC1S2_-_102046555.23-P1P2	BLOC1S2_+_102046339.23-P1P2	predicted	predicted	GACACAGCAAAGGGCGATTC	GGTACCCGGAATGGATGGGG	BLOC1S2_-_102046555.23-P1P2|BLOC1S2_+_102046339.23-P1P2
BLOC1S3	P1	BLOC1S3_+_45681876.23-P1	BLOC1S3_+_45681812.23-P1	predicted	predicted	GTGCAGAAGAGTCACATGAA	GTTGTGCGACGAGGAAAGTC	BLOC1S3_+_45681876.23-P1|BLOC1S3_+_45681812.23-P1
BLOC1S3	P2	BLOC1S3_+_45683367.23-P2	BLOC1S3_+_45683339.23-P2	predicted	predicted	GGGGAGAGGAACCAGATCTA	GGGGCCCTGGTCTCCGCAGT	BLOC1S3_+_45683367.23-P2|BLOC1S3_+_45683339.23-P2
BLOC1S4	P1P2	BLOC1S4_-_6717802.23-P1P2	BLOC1S4_-_6717799.23-P1P2	predicted	predicted	Ggggaggccggaaacaaagg	Ggctgggaggccggaaacaa	BLOC1S4_-_6717802.23-P1P2|BLOC1S4_-_6717799.23-P1P2
BLOC1S5	P1P2	BLOC1S5_-_8064755.23-P1P2	BLOC1S5_-_8064774.23-P1P2	predicted	predicted	GCCAGCGGGCGGTTCCGGAA	GAGGCGCCTGCCGTGTAGTC	BLOC1S5_-_8064755.23-P1P2|BLOC1S5_-_8064774.23-P1P2
BLOC1S6	P1P2	BLOC1S6_+_45879395.23-P1P2	BLOC1S6_+_45879410.23-P1P2	predicted	predicted	GTCAGCGGACTCAGCAGTGT	GGCCCCGGACGCAGTGTCAG	BLOC1S6_+_45879395.23-P1P2|BLOC1S6_+_45879410.23-P1P2
BLVRA	P1	BLVRA_+_43798178.23-P1	BLVRA_+_43798164.23-P1	predicted	predicted	Ggaccggaggcggtggggaa	Ggggaagggagtggacggaa	BLVRA_+_43798178.23-P1|BLVRA_+_43798164.23-P1
BLVRA	P2	BLVRA_+_43803773.23-P2	BLVRA_+_43803770.23-P2	predicted	predicted	GGCACAACTCACAAGTGCGG	GCAACTCACAAGTGCGGGGG	BLVRA_+_43803773.23-P2|BLVRA_+_43803770.23-P2
BLVRB	P1P2	BLVRB_-_40971760.23-P1P2	BLVRB_+_40971820.23-P1P2	predicted	predicted	GCGCGGCTCAGGTCAAGGGG	GTCTAAGTGGCGCGCAGAGA	BLVRB_-_40971760.23-P1P2|BLVRB_+_40971820.23-P1P2
BLZF1	P1P2	BLZF1_+_169337125.23-P1P2	BLZF1_-_169337163.23-P1P2	predicted	predicted	GGAGGGGCGGGTCTGTCGAT	GCCCTCCACGCTGTCGCCTG	BLZF1_+_169337125.23-P1P2|BLZF1_-_169337163.23-P1P2
BMF	P1P2	BMF_+_40401284.23-P1P2	BMF_-_40401323.23-P1P2	predicted	predicted	GACAGAATCCGCACTGGCGA	GCTGTCCCTAACACAGGCTC	BMF_+_40401284.23-P1P2|BMF_-_40401323.23-P1P2
BMI1	P1P2	BMI1_+_22609937.23-P1P2	BMI1_+_22609916.23-P1P2	predicted	predicted	GTGCTCCCCTCATTCCTTAA	GGCGGCCTGGGAATTAGTGT	BMI1_+_22609937.23-P1P2|BMI1_+_22609916.23-P1P2
BMP1	P1P2	BMP1_+_22022742.23-P1P2	BMP1_-_22022759.23-P1P2	predicted	predicted	Gccgccccccgctcggtccg	Gggagccgcggaccgagcgg	BMP1_+_22022742.23-P1P2|BMP1_-_22022759.23-P1P2
BMP10	P1P2	BMP10_+_69098701.23-P1P2	BMP10_+_69098684.23-P1P2	predicted	predicted	GTACACTAGGGAGATAAGAA	GAAAGGCTAGGCCCCTATAG	BMP10_+_69098701.23-P1P2|BMP10_+_69098684.23-P1P2
BMP15	ENST00000252677.3	BMP15_+_50653735.23-ENST00000252677.3	BMP15_-_50653417.23-ENST00000252677.3	predicted	predicted	GGGCCCCAACACAAGCCCAA	GTGTAGGGGCAAGTAGGATC	BMP15_+_50653735.23-ENST00000252677.3|BMP15_-_50653417.23-ENST00000252677.3
BMP2	P1	BMP2_-_6748236.23-P1	BMP2_+_6748200.23-P1	predicted	predicted	GCCGCCCGCTCGGGGATCCC	GCGGGCGGGAGCTGCGCGCA	BMP2_-_6748236.23-P1|BMP2_+_6748200.23-P1
BMP2	P2	BMP2_+_6750589.23-P2	BMP2_+_6750599.23-P2	predicted	predicted	GCAAACGTTTGGGATAATGA	GGACCGAAGCTCAAACGTTT	BMP2_+_6750589.23-P2|BMP2_+_6750599.23-P2
BMP2K	P1P2	BMP2K_+_79697351.23-P1P2	BMP2K_+_79697312.23-P1P2	predicted	predicted	GGGAGCGCGAGCCGGGGTAG	GTGGGCGGCCGGCCCCTCCA	BMP2K_+_79697351.23-P1P2|BMP2K_+_79697312.23-P1P2
BMP3	P1P2	BMP3_-_81951803.23-P1P2	BMP3_-_81951791.23-P1P2	predicted	predicted	GGCTAAGAGGGCGAGGACGA	GAGCCTGGTGCAAGCTAAGA	BMP3_-_81951803.23-P1P2|BMP3_-_81951791.23-P1P2
BMP4	P1	BMP4_+_54423678.23-P1	BMP4_+_54423681.23-P1	predicted	predicted	GCCTGCTAGGCGAGGTCGGG	GGGGCCTGCTAGGCGAGGTC	BMP4_+_54423678.23-P1|BMP4_+_54423681.23-P1
BMP4	P2	BMP4_-_54420232.23-P2	BMP4_-_54420335.23-P2	predicted	predicted	GCCCGCGGCAGGCGGCGAAA	GGCCCGAGCCTCAGCGGTCC	BMP4_-_54420232.23-P2|BMP4_-_54420335.23-P2
BMP5	P1P2	BMP5_-_55740556.23-P1P2	BMP5_-_55740409.23-P1P2	predicted	predicted	GATGGGACATACAAATTCTA	GAGTGTAAGCACAACCCTGC	BMP5_-_55740556.23-P1P2|BMP5_-_55740409.23-P1P2
BMP6	P1P2	BMP6_+_7726249.23-P1P2	BMP6_-_7726198.23-P1P2	predicted	predicted	GGACAGGCTGGCAGCCAATG	GAGGCGACGCCTCTCGGGAG	BMP6_+_7726249.23-P1P2|BMP6_-_7726198.23-P1P2
BMP7	P1P2	BMP7_+_55841596.23-P1P2	BMP7_-_55841907.23-P1P2	predicted	predicted	GCGCGCCGGAGGTTGGAAGA	Ggcgggacgtcgcggggatg	BMP7_+_55841596.23-P1P2|BMP7_-_55841907.23-P1P2
BMP8A	P1P2	BMP8A_+_39957139.23-P1P2	BMP8A_-_39957302.23-P1P2	predicted	predicted	GCGACCCCGAGGTGCGACCT	GAGCCGGGGCAAGGACTCGC	BMP8A_+_39957139.23-P1P2|BMP8A_-_39957302.23-P1P2
BMP8B	P1P2	BMP8B_-_40254666.23-P1P2	BMP8B_-_40254646.23-P1P2	predicted	predicted	Ggggctgcggccggtgtcgc	Gcacgcctgcgagggggccc	BMP8B_-_40254666.23-P1P2|BMP8B_-_40254646.23-P1P2
BMPER	P1P2	BMPER_+_33944914.23-P1P2	BMPER_+_33945031.23-P1P2	predicted	predicted	GCCCCTCAGCGCCGGAGAGG	GGGGAGAGACCAAGGTGTGG	BMPER_+_33944914.23-P1P2|BMPER_+_33945031.23-P1P2
BMPR1A	P1P2	BMPR1A_+_88516182.23-P1P2	BMPR1A_+_88516161.23-P1P2	predicted	predicted	GGAAGCGCCCGAAGAGTTCG	GGAGCCCGGCGCCCAGTTGC	BMPR1A_+_88516182.23-P1P2|BMPR1A_+_88516161.23-P1P2
BMPR1B	P1P2	BMPR1B_-_95678988.23-P1P2	BMPR1B_-_95678951.23-P1P2	predicted	predicted	GCACTAGTGGGAGCTGGAGA	GAATCCCTCCGCTAAGTACT	BMPR1B_-_95678988.23-P1P2|BMPR1B_-_95678951.23-P1P2
BMPR2	P1P2	BMPR2_+_203240832.23-P1P2	BMPR2_+_203240828.23-P1P2	predicted	predicted	GcggccccgccccTCGTTCG	GcccgccccTCGTTCGGGGC	BMPR2_+_203240832.23-P1P2|BMPR2_+_203240828.23-P1P2
BMS1	P1P2	BMS1_-_43278083.23-P1P2	BMS1_+_43277856.23-P1P2	predicted	predicted	GTGGAAGGACCTGGACCCGG	GTCACCGTGCCAAGGACGGA	BMS1_-_43278083.23-P1P2|BMS1_+_43277856.23-P1P2
BMX	P1P2	BMX_-_15518754.23-P1P2	BMX_+_15518811.23-P1P2	predicted	predicted	GATGTACCCGAGAGCTGCCT	GTGATTGAACGCAACAAAAA	BMX_-_15518754.23-P1P2|BMX_+_15518811.23-P1P2
BNC1	P1P2	BNC1_+_83953555.23-P1P2	BNC1_+_83953652.23-P1P2	predicted	predicted	Gaagcagcgcccgcggcgtg	GAGGTCTCCGCGGTCTGCGG	BNC1_+_83953555.23-P1P2|BNC1_+_83953652.23-P1P2
BNC2	P1P2	BNC2_+_16870902.23-P1P2	BNC2_+_16870763.23-P1P2	predicted	predicted	GAGGAGCCGGGGAACCGTGC	GaggcCCGGAGGAACTCGGA	BNC2_+_16870902.23-P1P2|BNC2_+_16870763.23-P1P2
BNIP1	P1P2	BNIP1_-_172571372.23-P1P2	BNIP1_+_172571403.23-P1P2	predicted	predicted	GAGGGCCATACCAAGAGGAG	GGAGGGTCACTGCGCAGAGT	BNIP1_-_172571372.23-P1P2|BNIP1_+_172571403.23-P1P2
BNIP2	P1P2	BNIP2_+_59981648.23-P1P2	BNIP2_-_59981665.23-P1P2	predicted	predicted	GCTAGCCCGTGACGTCTGAG	GCAACCCCCTCAGACGTCAC	BNIP2_+_59981648.23-P1P2|BNIP2_-_59981665.23-P1P2
BNIP3	P1P2	BNIP3_-_133795544.23-P1P2	BNIP3_+_133795606.23-P1P2	predicted	predicted	Gtgcgcgtgcgcaggggcgt	Gcccgcgtcccgcgcaccgc	BNIP3_-_133795544.23-P1P2|BNIP3_+_133795606.23-P1P2
BNIP3L	P1P2	BNIP3L_+_26240451.23-P1P2	BNIP3L_-_26240529.23-P1P2	predicted	predicted	GGGGCAGGGGCGCTCCCCTG	GTGGGCGGGCCCTGACGTCA	BNIP3L_+_26240451.23-P1P2|BNIP3L_-_26240529.23-P1P2
BNIPL	P1P2	BNIPL_-_151008893.23-P1P2	BNIPL_+_151008925.23-P1P2	predicted	predicted	GGAGAGGGATATATGGAGTC	GTTCTAGTGGGGGCCAGTCT	BNIPL_-_151008893.23-P1P2|BNIPL_+_151008925.23-P1P2
BOC	P1P2	BOC_-_112930137.23-P1P2	BOC_-_112930181.23-P1P2	predicted	predicted	GCCCCTGGGTTCGGGGAAAA	GGGAAAGCAAAAGAAGTTGG	BOC_-_112930137.23-P1P2|BOC_-_112930181.23-P1P2
BOD1	P1P2	BOD1_+_173043782.23-P1P2	BOD1_+_173043613.23-P1P2	predicted	predicted	GAGCAAGCACGAACCCTGCC	GACAACCTCTGCTGTATCAG	BOD1_+_173043782.23-P1P2|BOD1_+_173043613.23-P1P2
BOD1L1	P1	BOD1L1_+_13629424.23-P1	BOD1L1_-_13629413.23-P1	predicted	predicted	GGCCCGGCGACGGTCGAAAC	GGACGAAAGTCCGGCGACGG	BOD1L1_+_13629424.23-P1|BOD1L1_-_13629413.23-P1
BOD1L1	P2	BOD1L1_+_13616179.23-P2	BOD1L1_-_13616400.23-P2	predicted	predicted	GGACTCTGGAGGTGAAGGAC	GAATATCGACATGGCATCAT	BOD1L1_+_13616179.23-P2|BOD1L1_-_13616400.23-P2
BOD1L2	P1P2	BOD1L2_+_54814180.23-P1P2	BOD1L2_+_54814196.23-P1P2	predicted	predicted	Gagtgggcaagggcgaaaca	Ggtgggaaacaaatgccagt	BOD1L2_+_54814180.23-P1P2|BOD1L2_+_54814196.23-P1P2
BOK	P1P2	BOK_-_242498046.23-P1P2	BOK_+_242498036.23-P1P2	predicted	predicted	GCGGCCTGGTCGCCTTCTCC	GCCCTGGATGCGCCCGGAGA	BOK_-_242498046.23-P1P2|BOK_+_242498036.23-P1P2
BOLA1	P1	BOLA1_+_149858302.23-P1	BOLA1_+_149858310.23-P1	predicted	predicted	GAGGTCCGCACACGGACCAA	GAAAACGCAAGGTCCGCACA	BOLA1_+_149858302.23-P1|BOLA1_+_149858310.23-P1
BOLA1	P2	BOLA1_-_149871144.23-P2	BOLA1_-_149871037.23-P2	predicted	predicted	GTCCCAGCGTGCCTCAGGAA	GTCTGACCACCTTACCAGTG	BOLA1_-_149871144.23-P2|BOLA1_-_149871037.23-P2
BOLA2	ENST00000330978.3	BOLA2_-_29466374.23-ENST00000330978.3	BOLA2_-_29466437.23-ENST00000330978.3	predicted	predicted	GAGGCGGGGCGTCTGTGGTG	GGCCCGGGGCATCTCCGCGG	BOLA2_-_29466374.23-ENST00000330978.3|BOLA2_-_29466437.23-ENST00000330978.3
BOLA2B	ENST00000305321.4	BOLA2B_-_30205716.23-ENST00000305321.4	BOLA2B_-_30205779.23-ENST00000305321.4	predicted	predicted	GAGGCGGGGCGTCTGTGGTG	GGCCCGGGGCATCTCCGCGG	BOLA2B_-_30205716.23-ENST00000305321.4|BOLA2B_-_30205779.23-ENST00000305321.4
BOLA3	P1P2	BOLA3_+_74375197.23-P1P2	BOLA3_+_74375070.23-P1P2	predicted	predicted	GGCAGGCGCTGCAGTGTCGG	GGCGGCCTCTCCCACGGCGG	BOLA3_+_74375197.23-P1P2|BOLA3_+_74375070.23-P1P2
BOLL	P1P2	BOLL_+_198650191.23-P1P2	BOLL_-_198651228.23-P1P2	predicted	predicted	GGACCCGGACACTCTAGCCC	GGGGACTGGTGGGTTTCGAG	BOLL_+_198650191.23-P1P2|BOLL_-_198651228.23-P1P2
BOP1	P1	BOP1_-_145515243.23-P1	BOP1_-_145515300.23-P1	predicted	predicted	Gggcctgcgtgctcgcgccg	GcgCGCCCGTTGCAAGATGG	BOP1_-_145515243.23-P1|BOP1_-_145515300.23-P1
BOP1	P2	BOP1_-_145513001.23-P2	BOP1_+_145513146.23-P2	predicted	predicted	GGGGGGCTGCAAGGAAACAC	GGATGAGGAAGGCTCAGGTT	BOP1_-_145513001.23-P2|BOP1_+_145513146.23-P2
BORA	P1P2	BORA_-_73301873.23-P1P2	BORA_+_73301933.23-P1P2	predicted	predicted	GCGCGCTCGCCGCCGGCGTG	GGCCGCGTAGGAAATTCGAA	BORA_-_73301873.23-P1P2|BORA_+_73301933.23-P1P2
BPGM	P1P2	BPGM_+_134331304.23-P1P2	BPGM_+_134331297.23-P1P2	predicted	predicted	GGTCGCTGGTGCAAAACCTC	GGTGCAAAACCTCGGGTGCG	BPGM_+_134331304.23-P1P2|BPGM_+_134331297.23-P1P2
BPHL	P1P2	BPHL_-_3118714.23-P1P2	BPHL_+_3118800.23-P1P2	predicted	predicted	GCCGACGGGGACACTCATCC	GctgccGGGTGCTTTCCCAT	BPHL_-_3118714.23-P1P2|BPHL_+_3118800.23-P1P2
BPI	P1P2	BPI_-_36932467.23-P1P2	BPI_-_36932346.23-P1P2	predicted	predicted	GTGTGGGGCCCTAACCACAA	GGGAATGGGGTGCCTAGGGA	BPI_-_36932467.23-P1P2|BPI_-_36932346.23-P1P2
BPIFA1	P1	BPIFA1_-_31823573.23-P1	BPIFA1_+_31823744.23-P1	predicted	predicted	GCCCAACCTTGGCTCCGCTC	GGGGACGAGGAAGCATGTGT	BPIFA1_-_31823573.23-P1|BPIFA1_+_31823744.23-P1
BPIFA1	P2	BPIFA1_-_31825302.23-P2	BPIFA1_+_31825246.23-P2	predicted	predicted	Gtaacaggtgcccatgtctt	Gggtgaggaccactgatcag	BPIFA1_-_31825302.23-P2|BPIFA1_+_31825246.23-P2
BPIFA2	P1P2	BPIFA2_+_31755800.23-P1P2	BPIFA2_+_31755767.23-P1P2	predicted	predicted	GTCCAACTCAAAGGTCACCC	GGAAACGGATGGCTATGGAG	BPIFA2_+_31755800.23-P1P2|BPIFA2_+_31755767.23-P1P2
BPIFA3	P1P2	BPIFA3_+_31804947.23-P1P2	BPIFA3_-_31805061.23-P1P2	predicted	predicted	GAACCCCAGGCTCTCCAATT	GTCTGGGAGAGGACTCCTGT	BPIFA3_+_31804947.23-P1P2|BPIFA3_-_31805061.23-P1P2
BPIFB1	P1P2	BPIFB1_-_31870889.23-P1P2	BPIFB1_+_31870830.23-P1P2	predicted	predicted	GTCCCAAGGCTGCCTCCGGG	GTTTGGAGAAAGGAAGGTCC	BPIFB1_-_31870889.23-P1P2|BPIFB1_+_31870830.23-P1P2
BPIFB2	P1P2	BPIFB2_-_31595317.23-P1P2	BPIFB2_-_31595370.23-P1P2	predicted	predicted	GTAGCCCCAGGGGCTTGTAG	GGCAGCCCCAGCGCACATGT	BPIFB2_-_31595317.23-P1P2|BPIFB2_-_31595370.23-P1P2
BPIFB3	ENST00000375494.3	BPIFB3_+_31642954.23-ENST00000375494.3	BPIFB3_-_31643001.23-ENST00000375494.3	predicted	predicted	Ggggaaaactgagaccgaaa	GgagaaatggAACCCAATGA	BPIFB3_+_31642954.23-ENST00000375494.3|BPIFB3_-_31643001.23-ENST00000375494.3
BPIFB4	P1P2	BPIFB4_-_31667268.23-P1P2	BPIFB4_-_31667285.23-P1P2	predicted	predicted	GGCTCATGTGACACCATCTG	GTGGGGCTGAGTGCAAGTCT	BPIFB4_-_31667268.23-P1P2|BPIFB4_-_31667285.23-P1P2
BPIFB6	P1P2	BPIFB6_-_31611129.23-P1P2	BPIFB6_+_31611140.23-P1P2	predicted	predicted	GCCTCCTCTGACCTGGTCCA	GTATCACCACGTAGCCCTGA	BPIFB6_-_31611129.23-P1P2|BPIFB6_+_31611140.23-P1P2
BPIFC	P1P2	BPIFC_+_32860584.23-P1P2	BPIFC_-_32860559.23-P1P2	predicted	predicted	GTGGCACTGTCTGTTTATCT	GCTTCACTACAATTACCCAA	BPIFC_+_32860584.23-P1P2|BPIFC_-_32860559.23-P1P2
BPNT1	P1P2	BPNT1_+_220263256.23-P1P2	BPNT1_+_220263235.23-P1P2	predicted	predicted	GGGAGAGCTTGGAGAAAACA	GGACAAGTGGAATTTTCCCG	BPNT1_+_220263256.23-P1P2|BPNT1_+_220263235.23-P1P2
BPTF	P1P2	BPTF_+_65821494.23-P1P2	BPTF_+_65821529.23-P1P2	predicted	predicted	Gcgcgggagcgtcgagtcgg	GAcggagcgaagcggcgcgg	BPTF_+_65821494.23-P1P2|BPTF_+_65821529.23-P1P2
BPY2	ENST00000331070.3,ENST00000382585.1	BPY2_-_25129925.23-ENST00000331070.3,ENST00000382585.1	BPY2_+_25129862.23-ENST00000331070.3,ENST00000382585.1	predicted	predicted	GgtactgttcagccagggAC	Gtagcaatgtgtcactatgc	BPY2_-_25129925.23-ENST00000331070.3,ENST00000382585.1|BPY2_+_25129862.23-ENST00000331070.3,ENST00000382585.1
BPY2B	ENST00000382392.1	BPY2B_-_26763666.23-ENST00000382392.1	BPY2B_+_26763603.23-ENST00000382392.1	predicted	predicted	GgtactgttcagccagggAC	Gtagcaatgtgtcactatgc	BPY2B_-_26763666.23-ENST00000382392.1|BPY2B_+_26763603.23-ENST00000382392.1
BPY2C	ENST00000382287.1	BPY2C_+_27198734.23-ENST00000382287.1	BPY2C_-_27198797.23-ENST00000382287.1	predicted	predicted	GgtactgttcagccagggAC	Gtagcaatgtgtcactatgc	BPY2C_+_27198734.23-ENST00000382287.1|BPY2C_-_27198797.23-ENST00000382287.1
BRAF	P1P2	BRAF_-_140624854.23-P1P2	BRAF_+_140624902.23-P1P2	predicted	predicted	GCGGTGCGTGACGTAATCTG	GAGGCAAAGTGTGAGAGCGC	BRAF_-_140624854.23-P1P2|BRAF_+_140624902.23-P1P2
BRAP	P1P2	BRAP_-_112123838.23-P1P2	BRAP_-_112123868.23-P1P2	predicted	predicted	GACCGCGCACAGCGATTGGG	GGGGTCACCCACTGCTCTTC	BRAP_-_112123838.23-P1P2|BRAP_-_112123868.23-P1P2
BRAT1	P1P2	BRAT1_-_2595308.23-P1P2	BRAT1_-_2595429.23-P1P2	predicted	predicted	GGAAGGAGTTCAAGCTGAGA	GTCGAGGGCGGGGATCTCTG	BRAT1_-_2595308.23-P1P2|BRAT1_-_2595429.23-P1P2
BRCA1	P1P2	BRCA1_-_41277555.23-P1P2	BRCA1_-_41277587.23-P1P2	predicted	predicted	GGTCTCTCGGGGCTCTGGAT	GTGCCCCCGGATGACGTAAA	BRCA1_-_41277555.23-P1P2|BRCA1_-_41277587.23-P1P2
BRCA2	P1P2	BRCA2_-_32889490.23-P1P2	BRCA2_+_32889551.23-P1P2	predicted	predicted	GCGGTCAGATACTGACGGTT	GCACGCACCACCCGGAAGTC	BRCA2_-_32889490.23-P1P2|BRCA2_+_32889551.23-P1P2
BRCC3	P1P2	BRCC3_-_154299696.23-P1P2	BRCC3_+_154299666.23-P1P2	predicted	predicted	GAACCCGCGCGCCGAAGGCC	GCGGCGCGCGGGTTCCTAgg	BRCC3_-_154299696.23-P1P2|BRCC3_+_154299666.23-P1P2
BRD1	P1P2	BRD1_+_50219728.23-P1P2	BRD1_+_50219714.23-P1P2	predicted	predicted	GCGGCGTCCCGGGTGCACTA	GCACTAGGGTCGCTCTCTGC	BRD1_+_50219728.23-P1P2|BRD1_+_50219714.23-P1P2
BRD2	P1	BRD2_-_32940541.23-P1	BRD2_+_32940174.23-P1	predicted	predicted	GTTTCGTGCCGGCCAGGCAG	GACAGACTCCGAGGATTGGG	BRD2_-_32940541.23-P1|BRD2_+_32940174.23-P1
BRD2	P2	BRD2_-_32938439.23-P2	BRD2_+_32938605.23-P2	predicted	predicted	GGCCCAGGTTTTCTCGGGTG	GGAGGGGCAGGAGCCATTTT	BRD2_-_32938439.23-P2|BRD2_+_32938605.23-P2
BRD3	P1P2	BRD3_-_136933170.23-P1P2	BRD3_+_136933317.23-P1P2	predicted	predicted	GGACGCGCCGGAGCCGAGCA	Gccgctctcggccgggtcgg	BRD3_-_136933170.23-P1P2|BRD3_+_136933317.23-P1P2
BRD4	ENST00000263377.2,ENST00000371835.4	BRD4_-_15391392.23-ENST00000263377.2,ENST00000371835.4	BRD4_-_15391386.23-ENST00000263377.2,ENST00000371835.4	predicted	predicted	GTGCTGAAGTCATGAGGTGT	GCCACTGTGCTGAAGTCATG	BRD4_-_15391392.23-ENST00000263377.2,ENST00000371835.4|BRD4_-_15391386.23-ENST00000263377.2,ENST00000371835.4
BRD7	P1P2	BRD7_+_50403044.23-P1P2	BRD7_+_50403409.23-P1P2	predicted	predicted	GAGAAAGACGAGAGTCTGAG	GGGGTCTGGCACCCAGTATG	BRD7_+_50403044.23-P1P2|BRD7_+_50403409.23-P1P2
BRD8	P1P2	BRD8_-_137514890.23-P1P2	BRD8_+_137514380.23-P1P2	predicted	predicted	GGGAGCAAGTGGCACGTCTT	GAGGCACCGCGAACCAACGC	BRD8_-_137514890.23-P1P2|BRD8_+_137514380.23-P1P2
BRD9	P1P2	BRD9_+_893079.23-P1P2	BRD9_-_893026.23-P1P2	predicted	predicted	GAGCAGTGGGGACCCAACCA	GAAGCTAGGGCGGGGCCCGC	BRD9_+_893079.23-P1P2|BRD9_-_893026.23-P1P2
BRDT	P1P2	BRDT_+_92414819.23-P1P2	BRDT_+_92414805.23-P1P2	predicted	predicted	GAGTCTGAGCCGGGCAGCTC	GAGCTCAGGCCTGTTAGGGC	BRDT_+_92414819.23-P1P2|BRDT_+_92414805.23-P1P2
BRE	P1P2	BRE_+_28113506.23-P1P2	BRE_+_28113552.23-P1P2	predicted	predicted	GccgagccgggcgcTCGGAA	GCCTCTGCGGCCCCGAAGCT	BRE_+_28113506.23-P1P2|BRE_+_28113552.23-P1P2
BRF1	P1P2	BRF1_-_105767473.23-P1P2	BRF1_-_105767431.23-P1P2	predicted	predicted	GCAGCCGGGGACGGGACCCA	GACACCGGGGACTAGAGCTA	BRF1_-_105767473.23-P1P2|BRF1_-_105767431.23-P1P2
BRF2	P1P2	BRF2_-_37707531.23-P1P2	BRF2_+_37707467.23-P1P2	predicted	predicted	GGCTAGGAGAGGAGGTTCCT	GCGGAGGCACAGACCGGAAG	BRF2_-_37707531.23-P1P2|BRF2_+_37707467.23-P1P2
BRI3	P1P2	BRI3_+_97910858.23-P1P2	BRI3_+_97910917.23-P1P2	predicted	predicted	GccggcggggcgTCTTAAAG	GGGGCCCAGTCACAAGACCG	BRI3_+_97910858.23-P1P2|BRI3_+_97910917.23-P1P2
BRI3BP	P1P2	BRI3BP_-_125478075.23-P1P2	BRI3BP_-_125478125.23-P1P2	predicted	predicted	GATGAGAAGCCGCACCGGGT	Gccccggggccgggtcgcgt	BRI3BP_-_125478075.23-P1P2|BRI3BP_-_125478125.23-P1P2
BRICD5	P1P2	BRICD5_-_2261100.23-P1P2	BRICD5_-_2261074.23-P1P2	predicted	predicted	GGCCGCGTGGAAATCCAGTC	GTCAGGGTCTGGGAGGCGTA	BRICD5_-_2261100.23-P1P2|BRICD5_-_2261074.23-P1P2
BRINP1	P1P2	BRINP1_-_122131872.23-P1P2	BRINP1_-_122131860.23-P1P2	predicted	predicted	GAACGCCGGGGTTGCTTCCG	GAGGGAGGAGCTGAACGCCG	BRINP1_-_122131872.23-P1P2|BRINP1_-_122131860.23-P1P2
BRINP2	P1P2	BRINP2_-_177139885.23-P1P2	BRINP2_+_177139866.23-P1P2	predicted	predicted	GCCCCACTGCAACGCTGGGA	GAACCCTCCCAGCGTTGCAG	BRINP2_-_177139885.23-P1P2|BRINP2_+_177139866.23-P1P2
BRINP3	P1	BRINP3_-_190447368.23-P1	BRINP3_+_190447244.23-P1	predicted	predicted	GGGTGCGGGCGGTGATCGAA	GTGGGGGAATTGGTTGTGTT	BRINP3_-_190447368.23-P1|BRINP3_+_190447244.23-P1
BRINP3	P2	BRINP3_-_190444238.23-P2	BRINP3_-_190443982.23-P2	predicted	predicted	GCACCGCCCTCCAGATTCTT	GTGGAACCAGCAGTAACCAG	BRINP3_-_190444238.23-P2|BRINP3_-_190443982.23-P2
BRIP1	P1P2	BRIP1_-_59941056.23-P1P2	BRIP1_-_59940983.23-P1P2	predicted	predicted	GAAGGGCTCAAGGTACGCGG	GCAGTCCCGGTGCGAGGTGA	BRIP1_-_59941056.23-P1P2|BRIP1_-_59940983.23-P1P2
BRIX1	P1P2	BRIX1_-_34915747.23-P1P2	BRIX1_+_34915678.23-P1P2	predicted	predicted	GCAGACCTGGAGGACGACCG	GGCGGCACGCGCGGCTCTCT	BRIX1_-_34915747.23-P1P2|BRIX1_+_34915678.23-P1P2
BRK1	P1P2	BRK1_+_10157262.23-P1P2	BRK1_-_10157305.23-P1P2	predicted	predicted	GAATTCTCGGGCACTATGAT	GCGTGGGTGCTCAAGAGGAT	BRK1_+_10157262.23-P1P2|BRK1_-_10157305.23-P1P2
BRMS1	P1P2	BRMS1_-_66112683.23-P1P2	BRMS1_+_66112684.23-P1P2	predicted	predicted	GGGCCGGTCTCCATAGTAAC	GCGAAGGCCTGCGCGAATGT	BRMS1_-_66112683.23-P1P2|BRMS1_+_66112684.23-P1P2
BRMS1L	P1P2	BRMS1L_+_36295479.23-P1P2	BRMS1L_-_36295443.23-P1P2	predicted	predicted	GTGCCCTGCTCTGGTACGAT	GACCTACGAACTACAACTCC	BRMS1L_+_36295479.23-P1P2|BRMS1L_-_36295443.23-P1P2
BROX	P1P2	BROX_+_222885817.23-P1P2	BROX_-_222885411.23-P1P2	predicted	predicted	GGAGCCGCAAAGTTTGGCTG	GTCGCTGGGGCTGGTGGCGA	BROX_+_222885817.23-P1P2|BROX_-_222885411.23-P1P2
BRPF1	P1P2	BRPF1_-_9773138.23-P1P2	BRPF1_+_9773223.23-P1P2	predicted	predicted	GAGGAGGCAGGGAGCGGATA	GGGGATCTGGGGTCGTCGGG	BRPF1_-_9773138.23-P1P2|BRPF1_+_9773223.23-P1P2
BRPF3	P1P2	BRPF3_-_36164429.23-P1P2	BRPF3_+_36165056.23-P1P2	predicted	predicted	GAGAGCCCGCAGAGTCAGGG	GGGGACCTAGGGCCGCTCAA	BRPF3_-_36164429.23-P1P2|BRPF3_+_36165056.23-P1P2
BRS3	P1P2	BRS3_-_135569910.23-P1P2	BRS3_+_135570008.23-P1P2	predicted	predicted	GCCTGGGTAGATATGAAAAC	GCTGTCATAAGGAGAGGGAG	BRS3_-_135569910.23-P1P2|BRS3_+_135570008.23-P1P2
BRSK1	P1P2	BRSK1_+_55795196.23-P1P2	BRSK1_-_55795209.23-P1P2	predicted	predicted	Gagagaggacccaacagatg	Gcatctctgccccatctgtt	BRSK1_+_55795196.23-P1P2|BRSK1_-_55795209.23-P1P2
BRSK2	P1P2	BRSK2_+_1410946.23-P1P2	BRSK2_+_1410775.23-P1P2	predicted	predicted	Ggaacagccgagccgaacag	GAGCGCTCGGGGAGACTCTA	BRSK2_+_1410946.23-P1P2|BRSK2_+_1410775.23-P1P2
BRWD1	P1P2	BRWD1_-_40685578.23-P1P2	BRWD1_-_40685718.23-P1P2	predicted	predicted	GTGGACCGACGCCTCCGCGG	GTGCCTCCGGGGACTCGATG	BRWD1_-_40685578.23-P1P2|BRWD1_-_40685718.23-P1P2
BRWD3	P1P2	BRWD3_-_80065436.23-P1P2	BRWD3_-_80065389.23-P1P2	predicted	predicted	GGGAGGGTAAAAATGGTGAT	GGCCGAAGTGGCGAAGAGGT	BRWD3_-_80065436.23-P1P2|BRWD3_-_80065389.23-P1P2
BSCL2	P1	BSCL2_+_62473998.23-P1	BSCL2_-_62473868.23-P1	predicted	predicted	GTCCCCTGGGGCACATCTTG	GGGGTCCAGCACggcggggc	BSCL2_+_62473998.23-P1|BSCL2_-_62473868.23-P1
BSCL2	P2	BSCL2_+_62477145.23-P2	BSCL2_-_62477126.23-P2	predicted	predicted	GGAGAACGCCGGTTGCCTGG	GTCACGGAGTTTACCGTACA	BSCL2_+_62477145.23-P2|BSCL2_-_62477126.23-P2
BSDC1	P1P2	BSDC1_+_32860047.23-P1P2	BSDC1_+_32860149.23-P1P2	predicted	predicted	GGTGCCGTGTCGGAAGTCAA	GGGGAGGCGGGACCTAATGA	BSDC1_+_32860047.23-P1P2|BSDC1_+_32860149.23-P1P2
BSG	P1P2	BSG_+_572446.23-P1P2	BSG_+_572424.23-P1P2	predicted	predicted	GCACGCTCGCATGTACGCGC	GCTCCGGCAGGCTCACGCTA	BSG_+_572446.23-P1P2|BSG_+_572424.23-P1P2
BSN	P1P2	BSN_+_49591784.23-P1P2	BSN_-_49591866.23-P1P2	predicted	predicted	GCCCGCGCATGCGCTGTCCA	GAGCGCGCACAGGGGAAGGG	BSN_+_49591784.23-P1P2|BSN_-_49591866.23-P1P2
BSND	P1P2	BSND_+_55464550.23-P1P2	BSND_+_55464467.23-P1P2	predicted	predicted	GTGAGCGAGGGAGCACACAG	GCCTACTGTGGGGTTGAGCT	BSND_+_55464550.23-P1P2|BSND_+_55464467.23-P1P2
BSPH1	P1P2	BSPH1_-_48495583.23-P1P2	BSPH1_-_48495545.23-P1P2	predicted	predicted	GAACAAGTGGTGCAGCCTTA	GTAACCTAATGGGCTGCAGA	BSPH1_-_48495583.23-P1P2|BSPH1_-_48495545.23-P1P2
BSPRY	P1P2	BSPRY_-_116111744.23-P1P2	BSPRY_-_116111740.23-P1P2	predicted	predicted	GATGGGAGCGCGGGTTGGGT	GCGGGATGGGAGCGCGGGTT	BSPRY_-_116111744.23-P1P2|BSPRY_-_116111740.23-P1P2
BST1	P1P2	BST1_+_15704397.23-P1P2	BST1_+_15704413.23-P1P2	predicted	predicted	Ggtgaggaggcttgacccca	Gacctgcgaggtgagatgtg	BST1_+_15704397.23-P1P2|BST1_+_15704413.23-P1P2
BST2	P1P2	BST2_+_17516610.23-P1P2	BST2_+_17516639.23-P1P2	predicted	predicted	GCCAGCTGGGAAGGGCCCAA	GTGTCCCAGGCAGCCACAGT	BST2_+_17516610.23-P1P2|BST2_+_17516639.23-P1P2
BSX	P1P2	BSX_-_122852619.23-P1P2	BSX_+_122852717.23-P1P2	predicted	predicted	GGCCGGGAGAGCCAATGACG	GGTAGGAACAAGAACCCTGC	BSX_-_122852619.23-P1P2|BSX_+_122852717.23-P1P2
BTAF1	P1P2	BTAF1_-_93683562.23-P1P2	BTAF1_-_93683570.23-P1P2	predicted	predicted	GCGCCCGCGTCAGCAAAGAG	GTCAGCAAAGAGCGGAGCTG	BTAF1_-_93683562.23-P1P2|BTAF1_-_93683570.23-P1P2
BTBD1	P1P2	BTBD1_-_83736102.23-P1P2	BTBD1_+_83736032.23-P1P2	predicted	predicted	GCGGCCGCGGGAGGTGTAAC	GGGCGCGCGCGGTCAGGGAG	BTBD1_-_83736102.23-P1P2|BTBD1_+_83736032.23-P1P2
BTBD10	P1	BTBD10_-_13484951.23-P1	BTBD10_-_13484894.23-P1	predicted	predicted	GCGGCCACGGGTGGGATCTC	GGTGCTCTCCGCCCAGGGGT	BTBD10_-_13484951.23-P1|BTBD10_-_13484894.23-P1
BTBD10	P2	BTBD10_-_13461914.23-P2	BTBD10_-_13461985.23-P2	predicted	predicted	GAACAAAACGCAGGAGTTGA	GTAGCTCTGCCAGCTTGCCA	BTBD10_-_13461914.23-P2|BTBD10_-_13461985.23-P2
BTBD11	P1	BTBD11_+_107712138.23-P1	BTBD11_-_107712042.23-P1	predicted	predicted	GGGCGTATGCAAAGCAGGGG	GCAGCCTCGGTGTCCGCCGG	BTBD11_+_107712138.23-P1|BTBD11_-_107712042.23-P1
BTBD11	P2	BTBD11_+_107974708.23-P2	BTBD11_-_107974739.23-P2	predicted	predicted	Ggaccccggggcaggctctc	GtgccccggggtcacCGGTG	BTBD11_+_107974708.23-P2|BTBD11_-_107974739.23-P2
BTBD16	ENST00000260723.4,ENST00000368994.2	BTBD16_+_124030672.23-ENST00000260723.4,ENST00000368994.2	BTBD16_-_124030534.23-ENST00000260723.4,ENST00000368994.2	predicted	predicted	GGGCATCTCAGAGACCAGTG	Gcaccccagaatgccagagc	BTBD16_+_124030672.23-ENST00000260723.4,ENST00000368994.2|BTBD16_-_124030534.23-ENST00000260723.4,ENST00000368994.2
BTBD17	P1P2	BTBD17_-_72358214.23-P1P2	BTBD17_-_72358192.23-P1P2	predicted	predicted	GCCCCCAAGGGGAACAGATC	GGGGCTATTGTGCTGCCTGT	BTBD17_-_72358214.23-P1P2|BTBD17_-_72358192.23-P1P2
BTBD18	ENST00000422652.1	BTBD18_-_57519450.23-ENST00000422652.1	BTBD18_-_57519404.23-ENST00000422652.1	predicted	predicted	GCCTGACTGACCCTGGTAGT	GCCAAGGACGTTGCCACCCT	BTBD18_-_57519450.23-ENST00000422652.1|BTBD18_-_57519404.23-ENST00000422652.1
BTBD18	ENST00000436147.3	BTBD18_-_57518953.23-ENST00000436147.3	BTBD18_+_57519351.23-ENST00000436147.3	predicted	predicted	Gtggctgtataatctcacac	GGACCTTCCCGCAGAGTCAG	BTBD18_-_57518953.23-ENST00000436147.3|BTBD18_+_57519351.23-ENST00000436147.3
BTBD19	P1P2	BTBD19_-_45274111.23-P1P2	BTBD19_+_45274085.23-P1P2	predicted	predicted	GGGCCTGCCCGGGAGATGGG	GCATCTCCCGGGCAGGCCCA	BTBD19_-_45274111.23-P1P2|BTBD19_+_45274085.23-P1P2
BTBD2	P1P2	BTBD2_-_2016160.23-P1P2	BTBD2_+_2015687.23-P1P2	predicted	predicted	Gagtaggaggggcctgtaga	GCCACAAAATGGCGGCGGGT	BTBD2_-_2016160.23-P1P2|BTBD2_+_2015687.23-P1P2
BTBD3	P1P2	BTBD3_+_11871309.23-P1P2	BTBD3_+_11871433.23-P1P2	predicted	predicted	GAACCCGGGCTTGGAGAAGG	GAGCGCGCGTGCCCGGTCAC	BTBD3_+_11871309.23-P1P2|BTBD3_+_11871433.23-P1P2
BTBD6	P1P2	BTBD6_+_105714735.23-P1P2	BTBD6_-_105714747.23-P1P2	predicted	predicted	GCAGAGGTAGCCGTGGAAGG	GCGCCGGGAGCCGCCTTCCA	BTBD6_+_105714735.23-P1P2|BTBD6_-_105714747.23-P1P2
BTBD7	P1P2	BTBD7_-_93799520.23-P1P2	BTBD7_+_93799484.23-P1P2	predicted	predicted	GCGAGTCGGGCCGCGTGGGG	GCGACTCGCGCGGCGACGTC	BTBD7_-_93799520.23-P1P2|BTBD7_+_93799484.23-P1P2
BTBD8	P1P2	BTBD8_+_92545800.23-P1P2	BTBD8_+_92545949.23-P1P2	predicted	predicted	GGCGGGGCAAACCAATCCTC	GTCCCAGAGAAGCCGGACCG	BTBD8_+_92545800.23-P1P2|BTBD8_+_92545949.23-P1P2
BTBD9	P1P2	BTBD9_-_38607831.23-P1P2	BTBD9_+_38607776.23-P1P2	predicted	predicted	GAGGCCCAGAAAGTCGCCTA	GCCAGCAGCCCGCTGTCGAT	BTBD9_-_38607831.23-P1P2|BTBD9_+_38607776.23-P1P2
BTC	P1P2	BTC_+_75719851.23-P1P2	BTC_+_75719863.23-P1P2	predicted	predicted	GTGTCCCTGGGTGTGGGTAT	GGCAGCCCGAATATGTCCCT	BTC_+_75719851.23-P1P2|BTC_+_75719863.23-P1P2
BTD	P1P2	BTD_-_15643412.23-P1P2	BTD_-_15643123.23-P1P2	predicted	predicted	GCTAAGAGCAGGTACGGAGG	GTTAAACAACGGGAAGGAAG	BTD_-_15643412.23-P1P2|BTD_-_15643123.23-P1P2
BTF3	P1P2	BTF3_-_72794081.23-P1P2	BTF3_+_72794094.23-P1P2	predicted	predicted	GTGGCCTCTCCCAGAGGTAC	GAGGCCCTACGAGAGACTGC	BTF3_-_72794081.23-P1P2|BTF3_+_72794094.23-P1P2
BTF3L4	P1P2	BTF3L4_+_52521798.23-P1P2	BTF3L4_-_52521787.23-P1P2	predicted	predicted	GGTGGCCGCGCGGCATCCTG	GGGGACACAACAGAACGCTC	BTF3L4_+_52521798.23-P1P2|BTF3L4_-_52521787.23-P1P2
BTG3	P1P2	BTG3_-_18985290.23-P1P2	BTG3_+_18985400.23-P1P2	predicted	predicted	GAGGGGCGATGACCCGGGAA	GCAGGCTCAGGGTAGGGCGA	BTG3_-_18985290.23-P1P2|BTG3_+_18985400.23-P1P2
BTG4	P1P2	BTG4_+_111383214.23-P1P2	BTG4_-_111383331.23-P1P2	predicted	predicted	GTGCGCCCCGCCGCTCTGAG	GCCGAGGAGGCGAAGGGGAA	BTG4_+_111383214.23-P1P2|BTG4_-_111383331.23-P1P2
BTK	P1P2	BTK_+_100641314.23-P1P2	BTK_+_100641317.23-P1P2	predicted	predicted	GGTCCCAAGCAAATGAAGGG	GGAGGTCCCAAGCAAATGAA	BTK_+_100641314.23-P1P2|BTK_+_100641317.23-P1P2
BTLA	P1P2	BTLA_+_112218508.23-P1P2	BTLA_+_112218516.23-P1P2	predicted	predicted	GGGGCAAAAACGTGGTAGAG	GTCAACCTGGGGCAAAAACG	BTLA_+_112218508.23-P1P2|BTLA_+_112218516.23-P1P2
BTN1A1	ENST00000244513.6	BTN1A1_-_26501333.23-ENST00000244513.6	BTN1A1_-_26501330.23-ENST00000244513.6	predicted	predicted	GAAATCCATACTGGGGATGG	GTAAAAATCCATACTGGGGA	BTN1A1_-_26501333.23-ENST00000244513.6|BTN1A1_-_26501330.23-ENST00000244513.6
BTN2A1	P1P2	BTN2A1_+_26457896.23-P1P2	BTN2A1_-_26457903.23-P1P2	predicted	predicted	GTCCTTGGGGAGATTCCCTG	GACCTCAGTGACAAACCCCA	BTN2A1_+_26457896.23-P1P2|BTN2A1_-_26457903.23-P1P2
BTN2A2	P1P2	BTN2A2_+_26383273.23-P1P2	BTN2A2_-_26383279.23-P1P2	predicted	predicted	GGTGAGGCTGAACCAACCAA	GATAAGGCTCGAGACACCAT	BTN2A2_+_26383273.23-P1P2|BTN2A2_-_26383279.23-P1P2
BTN3A1	P1P2	BTN3A1_-_26402355.23-P1P2	BTN3A1_-_26402351.23-P1P2	predicted	predicted	GGATAAACAGTAAGGGAGGT	GAAGAGATAAACAGTAAGGG	BTN3A1_-_26402355.23-P1P2|BTN3A1_-_26402351.23-P1P2
BTN3A2	P1P2	BTN3A2_+_26365416.23-P1P2	BTN3A2_-_26365356.23-P1P2	predicted	predicted	GAACAGTAAGAGTCGCTCTT	GTCATTTCAACGTTCCTCAG	BTN3A2_+_26365416.23-P1P2|BTN3A2_-_26365356.23-P1P2
BTN3A3	P1P2	BTN3A3_+_26440647.23-P1P2	BTN3A3_+_26440358.23-P1P2	predicted	predicted	GTGGGAGGAAACCACTGAGG	GCATGAATATGGGTACCTGA	BTN3A3_+_26440647.23-P1P2|BTN3A3_+_26440358.23-P1P2
BTNL2	P1P2	BTNL2_+_32379629.23-P1P2	BTNL2_+_32379654.23-P1P2	predicted	predicted	GTGTGTGAGGACCTAACTGG	GCGCTGATGTGTGGGACGGT	BTNL2_+_32379629.23-P1P2|BTNL2_+_32379654.23-P1P2
BTNL3	P1P2	BTNL3_+_180415744.23-P1P2	BTNL3_+_180415731.23-P1P2	predicted	predicted	GAGAGTAGGGTACACTTGGA	GCTTGGAGGGACTTTGTTCT	BTNL3_+_180415744.23-P1P2|BTNL3_+_180415731.23-P1P2
BTNL8	P1P2	BTNL8_+_180325990.23-P1P2	BTNL8_+_180326027.23-P1P2	predicted	predicted	GGCAAAACGATGCCCTGTGT	GATAGTGTGGATAAGATTGG	BTNL8_+_180325990.23-P1P2|BTNL8_+_180326027.23-P1P2
BTNL9	P1	BTNL9_+_180467107.23-P1	BTNL9_+_180467110.23-P1	predicted	predicted	GTCTCCAGGGTCACAGAAGG	GATCTCTCCAGGGTCACAGA	BTNL9_+_180467107.23-P1|BTNL9_+_180467110.23-P1
BTNL9	P2	BTNL9_-_180479931.23-P2	BTNL9_-_180479963.23-P2	predicted	predicted	GGCGGGAAGACGCGGGGCGA	GGCCGCAGAAGCCTCGAGCC	BTNL9_-_180479931.23-P2|BTNL9_-_180479963.23-P2
BTRC	P1P2	BTRC_+_103113757.23-P1P2	BTRC_-_103113687.23-P1P2	predicted	predicted	GTGCGCAGGCGAAAGCCCAC	GACGCTGCCGCAGTGAACTG	BTRC_+_103113757.23-P1P2|BTRC_-_103113687.23-P1P2
BUB1	P1P2	BUB1_+_111435754.23-P1P2	BUB1_-_111435881.23-P1P2	predicted	predicted	GGAGCTACTGGCTCAAGGGA	GGGGGGAGCAGGCTTGGCTC	BUB1_+_111435754.23-P1P2|BUB1_-_111435881.23-P1P2
BUB1B	P1P2	BUB1B_+_40453166.23-P1P2	BUB1B_+_40453118.23-P1P2	predicted	predicted	GTCTCGCCCAAGGCATTCTG	GCGAACTCGCGGTGCATAAT	BUB1B_+_40453166.23-P1P2|BUB1B_+_40453118.23-P1P2
BUB3	P1P2	BUB3_-_124913794.23-P1P2	BUB3_+_124913699.23-P1P2	predicted	predicted	GGAGCCGGAACAGGATGACT	GGGGGCATCAGCGTTCGAGC	BUB3_-_124913794.23-P1P2|BUB3_+_124913699.23-P1P2
BUD13	P1P2	BUD13_-_116643785.23-P1P2	BUD13_+_116643845.23-P1P2	predicted	predicted	GGGGCCACGGCCGGAAGTGG	GCCGAAGGTGCGCACGTCCC	BUD13_-_116643785.23-P1P2|BUD13_+_116643845.23-P1P2
BUD31	P1P2	BUD31_+_99006273.23-P1P2	BUD31_+_99006350.23-P1P2	predicted	predicted	GGCCACTGCGGCCACTGAAG	GGGGCAAGCCTGGACTTAGG	BUD31_+_99006273.23-P1P2|BUD31_+_99006350.23-P1P2
BVES	P1P2	BVES_+_105585169.23-P1P2	BVES_-_105585585.23-P1P2	predicted	predicted	GCAGACCCGCAGCGGAGTCG	GCTCCTGCTGCGGAGGAAGA	BVES_+_105585169.23-P1P2|BVES_-_105585585.23-P1P2
BYSL	P1P2	BYSL_+_41888934.23-P1P2	BYSL_+_41888949.23-P1P2	predicted	predicted	GTCAGTGGAGGCGTCACCGA	GAATCCGCAGATGATGTCAG	BYSL_+_41888934.23-P1P2|BYSL_+_41888949.23-P1P2
BZRAP1	P1P2	BZRAP1_-_56406296.23-P1P2	BZRAP1_+_56406356.23-P1P2	predicted	predicted	GTGAACCGGCTGACAGGGTC	GAATGTGTGAAGATGAGGGT	BZRAP1_-_56406296.23-P1P2|BZRAP1_+_56406356.23-P1P2
BZW1	P1P2	BZW1_+_201676154.23-P1P2	BZW1_+_201676230.23-P1P2	predicted	predicted	GCCTCCGCCCTGGCCGGGAT	GGGGCCCTCGGGTCGTGCGG	BZW1_+_201676154.23-P1P2|BZW1_+_201676230.23-P1P2
BZW2	P1P2	BZW2_-_16685397.23-P1P2	BZW2_+_16685697.23-P1P2	predicted	predicted	GCTCGGGCGAGCCAGGCGGA	GCAGACTGCGCCACTCCCGG	BZW2_-_16685397.23-P1P2|BZW2_+_16685697.23-P1P2
C10orf10	P1P2	C10orf10_-_45474455.23-P1P2	C10orf10_+_45474556.23-P1P2	predicted	predicted	GTACGCTGCAGGGCAGGAAA	GGGGTGGTGTAACACAGAGT	C10orf10_-_45474455.23-P1P2|C10orf10_+_45474556.23-P1P2
C10orf105	P1P2	C10orf105_-_73479733.23-P1P2	C10orf105_-_73479747.23-P1P2	predicted	predicted	GTCTCCTTGGAGCCCTCTCA	GTCTCAGGGGTGGAAGACTC	C10orf105_-_73479733.23-P1P2|C10orf105_-_73479747.23-P1P2
C10orf107	P1P2	C10orf107_+_63422596.23-P1P2	C10orf107_+_63422519.23-P1P2	predicted	predicted	GCCTCTGCCCGCCGGGTAGA	GACGGAGGCCCTGAATCCTC	C10orf107_+_63422596.23-P1P2|C10orf107_+_63422519.23-P1P2
C10orf11	ENST00000372499.1	C10orf11_+_77542325.23-ENST00000372499.1	C10orf11_+_77542427.23-ENST00000372499.1	predicted	predicted	GCAGCACCCTGGCCGACCTC	GACTCTACTTGGAACTGCAC	C10orf11_+_77542325.23-ENST00000372499.1|C10orf11_+_77542427.23-ENST00000372499.1
C10orf111	P1P2	C10orf111_+_15139555.23-P1P2	C10orf111_-_15139795.23-P1P2	predicted	predicted	GCTGGGCGGCCCAACCGGGA	GCCAGGGGCGGCGTGCAGTG	C10orf111_+_15139555.23-P1P2|C10orf111_-_15139795.23-P1P2
C10orf112	ENST00000454679.2	C10orf112_-_19493067.23-ENST00000454679.2	C10orf112_+_19492966.23-ENST00000454679.2	predicted	predicted	GTAGCATGAGATGTAGATAG	GCTATCTGTACCACCCATAA	C10orf112_-_19493067.23-ENST00000454679.2|C10orf112_+_19492966.23-ENST00000454679.2
C10orf113	ENST00000529198.1,ENST00000534331.1	C10orf113_-_21435642.23-ENST00000529198.1,ENST00000534331.1	C10orf113_-_21435825.23-ENST00000529198.1,ENST00000534331.1	predicted	predicted	GGAAAAGAATTGCAATGCCC	GTAAACAGCTGTCGAAGCTC	C10orf113_-_21435642.23-ENST00000529198.1,ENST00000534331.1|C10orf113_-_21435825.23-ENST00000529198.1,ENST00000534331.1
C10orf118	P1	C10orf118_+_115934132.23-P1	C10orf118_+_115934192.23-P1	predicted	predicted	GCCTCTCGGGCCGCAAGGTG	GGACCCGGCTCTCCAGGTCG	C10orf118_+_115934132.23-P1|C10orf118_+_115934192.23-P1
C10orf118	P2	C10orf118_-_115904479.23-P2	C10orf118_+_115904440.23-P2	predicted	predicted	GCCAGTAACACTATAATCAA	GCTGGACTGATTACTTTGTG	C10orf118_-_115904479.23-P2|C10orf118_+_115904440.23-P2
C10orf12	ENST00000286067.2	C10orf12_+_98740858.23-ENST00000286067.2	C10orf12_-_98740874.23-ENST00000286067.2	predicted	predicted	GCTGTTCCGTCAAGTGTAGA	GCACAGCCCTCTACACTTGA	C10orf12_+_98740858.23-ENST00000286067.2|C10orf12_-_98740874.23-ENST00000286067.2
C10orf120	P1P2	C10orf120_-_124459540.23-P1P2	C10orf120_-_124459493.23-P1P2	predicted	predicted	GAATGGATAGAGAATGTGGC	GGAAATGGACACACATTACC	C10orf120_-_124459540.23-P1P2|C10orf120_-_124459493.23-P1P2
C10orf126	ENST00000375520.1	C10orf126_-_29135135.23-ENST00000375520.1	C10orf126_+_29135228.23-ENST00000375520.1	predicted	predicted	Ggatgtgagcatcgtcctca	Ggactcctgaaacccctcca	C10orf126_-_29135135.23-ENST00000375520.1|C10orf126_+_29135228.23-ENST00000375520.1
C10orf128	P1P2	C10orf128_+_50396563.23-P1P2	C10orf128_+_50396536.23-P1P2	predicted	predicted	GGTGGAGTCCAGAATGACAG	GTTCAGCCCTGTCTTCAGAG	C10orf128_+_50396563.23-P1P2|C10orf128_+_50396536.23-P1P2
C10orf129	P1P2	C10orf129_+_96953888.23-P1P2	C10orf129_-_96953657.23-P1P2	predicted	predicted	GAGTCCTGGCTCACTTTCAT	GAGGGTGTGGTTACCTCACC	C10orf129_+_96953888.23-P1P2|C10orf129_-_96953657.23-P1P2
C10orf131	P1P2	C10orf131_-_97667544.23-P1P2	C10orf131_+_97667408.23-P1P2	predicted	predicted	GCTACAACTCACACGCTCAC	GATACCCAGCGGGTGAGTAC	C10orf131_-_97667544.23-P1P2|C10orf131_+_97667408.23-P1P2
C10orf137	P1P2	C10orf137_-_127408191.23-P1P2	C10orf137_-_127408167.23-P1P2	predicted	predicted	GGCGAAGGTGGCACCCGCAG	GCGCACTACAATTCCCGCCC	C10orf137_-_127408191.23-P1P2|C10orf137_-_127408167.23-P1P2
C10orf2	P1P2	C10orf2_-_102747243.23-P1P2	C10orf2_+_102747147.23-P1P2	predicted	predicted	GAGCCTAAGCAGCGAGGAGA	GTGGCCAGCGTTCTCCACAA	C10orf2_-_102747243.23-P1P2|C10orf2_+_102747147.23-P1P2
C10orf25	P1P2	C10orf25_-_45496412.23-P1P2	C10orf25_-_45496380.23-P1P2	predicted	predicted	GGCCCAGCGAGCCAGAGTGG	GGCGAGGCCCTCACTTCCGG	C10orf25_-_45496412.23-P1P2|C10orf25_-_45496380.23-P1P2
C10orf32	P1P2	C10orf32_+_104613840.23-P1P2	C10orf32_+_104613916.23-P1P2	predicted	predicted	GGGGTCCAGGCAAACATCTC	GGGACGCATGCGCCTGATGG	C10orf32_+_104613840.23-P1P2|C10orf32_+_104613916.23-P1P2
C10orf35	P1P2	C10orf35_+_71389900.23-P1P2	C10orf35_+_71389858.23-P1P2	predicted	predicted	GCACCTGCCCGGCCCAGGGT	GGGTCGGGGAGATGGGGCGT	C10orf35_+_71389900.23-P1P2|C10orf35_+_71389858.23-P1P2
C10orf53	P1P2	C10orf53_-_50887612.23-P1P2	C10orf53_+_50887614.23-P1P2	predicted	predicted	GAGGGTCACGTGAGCAGCTT	GTGGCGCTAGGGGATCCTCC	C10orf53_-_50887612.23-P1P2|C10orf53_+_50887614.23-P1P2
C10orf54	P1P2	C10orf54_-_73533424.23-P1P2	C10orf54_-_73533469.23-P1P2	predicted	predicted	GTCCCGGAGGCCGGCCCCGT	GCGAGTCAGCTCCACTTGAT	C10orf54_-_73533424.23-P1P2|C10orf54_-_73533469.23-P1P2
C10orf55	P1P2	C10orf55_-_75677025.23-P1P2	C10orf55_+_75677020.23-P1P2	predicted	predicted	GCCCCCACGTGACAGTGCCT	GTGCAGAATAATACATTCCC	C10orf55_-_75677025.23-P1P2|C10orf55_+_75677020.23-P1P2
C10orf62	P1P2	C10orf62_-_99349353.23-P1P2	C10orf62_+_99349269.23-P1P2	predicted	predicted	GCCTGCCAGGCTAGACATGA	GGTCCCCAGGCTCAGTGAAA	C10orf62_-_99349353.23-P1P2|C10orf62_+_99349269.23-P1P2
C10orf67	P1P2	C10orf67_-_23633711.23-P1P2	C10orf67_+_23633723.23-P1P2	predicted	predicted	GGGACCAAGGCCATCATAAG	GCAGGTGGAGACAGCTTATT	C10orf67_-_23633711.23-P1P2|C10orf67_+_23633723.23-P1P2
C10orf71	P1P2	C10orf71_+_50507111.23-P1P2	C10orf71_-_50507085.23-P1P2	predicted	predicted	GCACGAGTAACAGATCACTT	GTGGAATCGTGGTTAGGGTC	C10orf71_+_50507111.23-P1P2|C10orf71_-_50507085.23-P1P2
C10orf76	P1P2	C10orf76_+_103815944.23-P1P2	C10orf76_-_103816126.23-P1P2	predicted	predicted	GGACACGGGAAGGGTCGGGG	GCAGTGGACTTGTCTATTGA	C10orf76_+_103815944.23-P1P2|C10orf76_-_103816126.23-P1P2
C10orf82	P1P2	C10orf82_+_118429913.23-P1P2	C10orf82_-_118429895.23-P1P2	predicted	predicted	GCCCCTCCTAACAGGAGACA	GTCCAATACAGGAGCTTCCT	C10orf82_+_118429913.23-P1P2|C10orf82_-_118429895.23-P1P2
C10orf88	P1P2	C10orf88_-_124713907.23-P1P2	C10orf88_+_124713802.23-P1P2	predicted	predicted	GGCGCGGCGTTCAAAGTGTG	GAAGCGGCGGGTACTTGAAG	C10orf88_-_124713907.23-P1P2|C10orf88_+_124713802.23-P1P2
C10orf90	ENST00000284694.7	C10orf90_+_128210115.23-ENST00000284694.7	C10orf90_-_128210103.23-ENST00000284694.7	predicted	predicted	GACAAGAAATGTCACAAGGT	GTTTACAGGGCAACCAGGGG	C10orf90_+_128210115.23-ENST00000284694.7|C10orf90_-_128210103.23-ENST00000284694.7
C10orf91	P1P2	C10orf91_-_134257381.23-P1P2	C10orf91_+_134258576.23-P1P2	predicted	predicted	GCCAGCAGCTGGGGTGTCTG	GGTACCCTGCAGAGAGGGTA	C10orf91_-_134257381.23-P1P2|C10orf91_+_134258576.23-P1P2
C10orf95	P1P2	C10orf95_+_104211396.23-P1P2	C10orf95_+_104211386.23-P1P2	predicted	predicted	GAGGCTGGGGTGTAGTGACT	GGTAGTGACTGGGAGCTAAC	C10orf95_+_104211396.23-P1P2|C10orf95_+_104211386.23-P1P2
C10orf99	P1P2	C10orf99_+_85933358.23-P1P2	C10orf99_-_85933329.23-P1P2	predicted	predicted	GCCCAGAGAGGTTTCAGAAC	GCTAGACAGTGGCTCTTCCT	C10orf99_+_85933358.23-P1P2|C10orf99_-_85933329.23-P1P2
C11orf1	P1P2	C11orf1_-_111750009.23-P1P2	C11orf1_+_111749990.23-P1P2	predicted	predicted	GAGCCGGTGTACCGACTCCC	GCACCGGGGAGTCGGTACAC	C11orf1_-_111750009.23-P1P2|C11orf1_+_111749990.23-P1P2
C11orf16	P1P2	C11orf16_+_8954518.23-P1P2	C11orf16_-_8954658.23-P1P2	predicted	predicted	GTGGCAACCAGGAGTCGGTT	GGGGTGGGGCAGGAAGTGAT	C11orf16_+_8954518.23-P1P2|C11orf16_-_8954658.23-P1P2
C11orf21	P1P2	C11orf21_-_2323403.23-P1P2	C11orf21_-_2323292.23-P1P2	predicted	predicted	GGGGCCTTGGAGTCGAGTCA	GCGGATGCAGCCTACCTCCT	C11orf21_-_2323403.23-P1P2|C11orf21_-_2323292.23-P1P2
C11orf24	P1P2	C11orf24_-_68039540.23-P1P2	C11orf24_-_68039558.23-P1P2	predicted	predicted	GCGGCGGGGCCTGTGGCGAA	GACGGAGGCGAGCCGGAAGT	C11orf24_-_68039540.23-P1P2|C11orf24_-_68039558.23-P1P2
C11orf30	P1P2	C11orf30_-_76155757.23-P1P2	C11orf30_-_76155762.23-P1P2	predicted	predicted	GAGCAGAGAGCGCAGCCGAT	GAGAGCGCAGCCGATTGGCT	C11orf30_-_76155757.23-P1P2|C11orf30_-_76155762.23-P1P2
C11orf31	P1P2	C11orf31_+_57508882.23-P1P2	C11orf31_+_57508928.23-P1P2	predicted	predicted	GTGGCCTGGAGGCGGACCTT	GGAAACCTCTCTCAAAGGAA	C11orf31_+_57508882.23-P1P2|C11orf31_+_57508928.23-P1P2
C11orf34	P1P2	C11orf34_+_112131473.23-P1P2	C11orf34_+_112131607.23-P1P2	predicted	predicted	GGTGACTGGTGATTCATTCC	GGGTATTCACATCTTCTCAA	C11orf34_+_112131473.23-P1P2|C11orf34_+_112131607.23-P1P2
C11orf35	P1P2	C11orf35_-_560839.23-P1P2	C11orf35_-_560855.23-P1P2	predicted	predicted	GgcgACGAGCCAATGGGTCG	GTCGGGGAGGGGCGTGACAG	C11orf35_-_560839.23-P1P2|C11orf35_-_560855.23-P1P2
C11orf40	ENST00000307616.1	C11orf40_+_4599320.23-ENST00000307616.1	C11orf40_-_4599211.23-ENST00000307616.1	predicted	predicted	GAGAAGCATGGGAGCAACAA	Gcaaacttgctgaatcatgc	C11orf40_+_4599320.23-ENST00000307616.1|C11orf40_-_4599211.23-ENST00000307616.1
C11orf42	P1P2	C11orf42_+_6226606.23-P1P2	C11orf42_+_6226731.23-P1P2	predicted	predicted	GATTAGGGGAAGAAAATGCA	GCCACTGCATGACATCATAG	C11orf42_+_6226606.23-P1P2|C11orf42_+_6226731.23-P1P2
C11orf44	ENST00000317019.2	C11orf44_-_130542794.23-ENST00000317019.2	C11orf44_+_130542541.23-ENST00000317019.2	predicted	predicted	GTGGGGACACCATTGGATGG	GCCTCCCAGCAAATCATCAG	C11orf44_-_130542794.23-ENST00000317019.2|C11orf44_+_130542541.23-ENST00000317019.2
C11orf45	P1	C11orf45_+_128774706.23-P1	C11orf45_-_128774737.23-P1	predicted	predicted	GTCATAGCACATGATGGAGT	GCATGTGCTATGAAACAAAC	C11orf45_+_128774706.23-P1|C11orf45_-_128774737.23-P1
C11orf45	P2	C11orf45_-_128776028.23-P2	C11orf45_-_128776165.23-P2	predicted	predicted	Gaggagggctcctgtaaacc	Gcctcagctccaggcaaaat	C11orf45_-_128776028.23-P2|C11orf45_-_128776165.23-P2
C11orf48	P1	C11orf48_-_62432793.23-P1	C11orf48_+_62432829.23-P1	predicted	predicted	GGTGCGGGAGGCCTTTCGGA	GCACTCCCGGCCGCCCAATC	C11orf48_-_62432793.23-P1|C11orf48_+_62432829.23-P1
C11orf48	P2	C11orf48_-_62439949.23-P2	C11orf48_+_62439845.23-P2	predicted	predicted	GTGTCCCACCCCACCAGAAG	GCGACTGCAGGGCTCATTCT	C11orf48_-_62439949.23-P2|C11orf48_+_62439845.23-P2
C11orf49	P1P2	C11orf49_+_46958257.23-P1P2	C11orf49_-_46958200.23-P1P2	predicted	predicted	GGCACCCACGCGGCGGAAGG	GACTGCCCCCGGAACTTGAG	C11orf49_+_46958257.23-P1P2|C11orf49_-_46958200.23-P1P2
C11orf52	P1	C11orf52_-_111783331.23-P1	C11orf52_-_111783300.23-P1	predicted	predicted	GACAGCTGAAGAGTGTGCGG	GGACCCTCAGCTGTCCTCTC	C11orf52_-_111783331.23-P1|C11orf52_-_111783300.23-P1
C11orf52	P2	C11orf52_-_111789513.23-P2	C11orf52_+_111789529.23-P2	predicted	predicted	GCGTGTGTTGTTCTACCCTT	GACCTGCTGGAATGATTCCC	C11orf52_-_111789513.23-P2|C11orf52_+_111789529.23-P2
C11orf53	P1P2	C11orf53_+_111154717.23-P1P2	C11orf53_-_111154534.23-P1P2	predicted	predicted	GTGCAGCTGAGTCTCTGCCT	Gacagcgccggtcaccggga	C11orf53_+_111154717.23-P1P2|C11orf53_-_111154534.23-P1P2
C11orf54	P1P2	C11orf54_-_93474744.23-P1P2	C11orf54_-_93474661.23-P1P2	predicted	predicted	GCGGGAAGAAGGCGAGCGGT	GCCAACCGTGCGGAAGAAAA	C11orf54_-_93474744.23-P1P2|C11orf54_-_93474661.23-P1P2
C11orf57	P1P2	C11orf57_+_111944940.23-P1P2	C11orf57_+_111944828.23-P1P2	predicted	predicted	GAGCCCAGAGACTCCCACAA	GCAAGCCTGGCACCAGAAGG	C11orf57_+_111944940.23-P1P2|C11orf57_+_111944828.23-P1P2
C11orf58	P1P2	C11orf58_-_16760028.23-P1P2	C11orf58_+_16759970.23-P1P2	predicted	predicted	GCCGAAGGCGGGGCCTCTGA	GTTCCCGCGGATGTGTATGG	C11orf58_-_16760028.23-P1P2|C11orf58_+_16759970.23-P1P2
C11orf63	P1P2	C11orf63_+_122753480.23-P1P2	C11orf63_+_122753381.23-P1P2	predicted	predicted	GACCCCCGGCCCTGGCACGG	GCGGACTTCCCAGCGCCGGA	C11orf63_+_122753480.23-P1P2|C11orf63_+_122753381.23-P1P2
C11orf65	P1P2	C11orf65_-_108338349.23-P1P2	C11orf65_-_108338245.23-P1P2	predicted	predicted	GCGCGCTCTGACAAAGTGCA	GGACTCCTAGGTAACGTCGC	C11orf65_-_108338349.23-P1P2|C11orf65_-_108338245.23-P1P2
C11orf68	P1P2	C11orf68_-_65686854.23-P1P2	C11orf68_-_65686752.23-P1P2	predicted	predicted	GACTCCGCGGGAAACGGCGG	GGGGAGCGGCGGTCCAGACT	C11orf68_-_65686854.23-P1P2|C11orf68_-_65686752.23-P1P2
C11orf70	P1P2	C11orf70_+_101917983.23-P1P2	C11orf70_+_101917978.23-P1P2	predicted	predicted	GTGGCGGTTAGGGAAACTAG	GGTTAGGGAAACTAGGGGTC	C11orf70_+_101917983.23-P1P2|C11orf70_+_101917978.23-P1P2
C11orf71	P1P2	C11orf71_-_114271322.23-P1P2	C11orf71_+_114271574.23-P1P2	predicted	predicted	GCAGGGAGCGTGAGGACGTG	GCACCCGTCGGGTCCCCTGA	C11orf71_-_114271322.23-P1P2|C11orf71_+_114271574.23-P1P2
C11orf73	P1P2	C11orf73_+_86013165.23-P1P2	C11orf73_-_86013191.23-P1P2	predicted	predicted	GAGGGCACCGCGCCAGTTTC	GAACTGGCGCGGTGCCCTCT	C11orf73_+_86013165.23-P1P2|C11orf73_-_86013191.23-P1P2
C11orf74	P1P2	C11orf74_+_36615949.23-P1P2	C11orf74_+_36615899.23-P1P2	predicted	predicted	GCTAGGGAGCATATAGTCCG	GAATGGCAGTAAAGGTTCTG	C11orf74_+_36615949.23-P1P2|C11orf74_+_36615899.23-P1P2
C11orf80	P1P2	C11orf80_-_66512106.23-P1P2	C11orf80_+_66512048.23-P1P2	predicted	predicted	GGGCGCTCAGAGGCTCTAGG	GCCCGCAGGTGGGAGGTTCG	C11orf80_-_66512106.23-P1P2|C11orf80_+_66512048.23-P1P2
C11orf82	P1P2	C11orf82_+_82612485.23-P1P2	C11orf82_-_82612782.23-P1P2	predicted	predicted	GTGGCGGGGTGACTGAAAGA	GAGGACGCGGGAGATTCGAT	C11orf82_+_82612485.23-P1P2|C11orf82_-_82612782.23-P1P2
[truncated: 19,503 more rows]

## Sheet: 3-4 library
gene	transcript	sgID_A	sgID_B	source_A	source_B	protospacer_A	protospacer_B	sgID_AB
ARID1A	P1P2	ARID1A_+_27022167.23-P1P2	ARID1A_-_27022241.23-P1P2	gamma	gamma	GCCGCCTGGCAAACCCGGAG	GGAGCCTCGTGTCGGAGTGA	ARID1A_+_27022167.23-P1P2|ARID1A_-_27022241.23-P1P2
ARRDC3	P1P2	ARRDC3_+_90679274.23-P1P2	ARRDC3_+_90679367.23-P1P2	gamma	gamma	GTACTGTACCCGGGAGCGAG	GCGGTAGCCTGCCTACCAAT	ARRDC3_+_90679274.23-P1P2|ARRDC3_+_90679367.23-P1P2
BCL9L	P1P2	BCL9L_-_118796808.23-P1P2	BCL9L_-_118796816.23-P1P2	gamma	gamma	GCGGCTAGCGGGAGGCAGGT	GGGGAGGCAGGTTGGCCCGG	BCL9L_-_118796808.23-P1P2|BCL9L_-_118796816.23-P1P2
BTG1	P1P2	BTG1_-_92539759.23-P1P2	BTG1_-_92539877.23-P1P2	gamma	gamma	GGGTTCGGAGCCGAAAGGGG	GACCCAGTTGCTTGTGTCGA	BTG1_-_92539759.23-P1P2|BTG1_-_92539877.23-P1P2
BTG2	P1P2	BTG2_+_203274415.23-P1P2	BTG2_-_203274380.23-P1P2	gamma	gamma	GAGTGCTAGGAACCTGCGCC	GGAGCTCTCAGTCCCGTCCC	BTG2_+_203274415.23-P1P2|BTG2_-_203274380.23-P1P2
C3orf72	P1P2	C3orf72_-_138665809.23-P1P2	C3orf72_+_138665897.23-P1P2	gamma	gamma	GGGGAGTCCGCCCAACAGAG	GGGGTCGTGCTTCGGGAAAC	C3orf72_-_138665809.23-P1P2|C3orf72_+_138665897.23-P1P2
CBFA2T3	P2	CBFA2T3_+_89043555.23-P2	CBFA2T3_+_89043673.23-P2	gamma	gamma	GGCCCCAGATGGTTCCTGTC	GGCCCAGTGGCCACGCTGTA	CBFA2T3_+_89043555.23-P2|CBFA2T3_+_89043673.23-P2
CBL	P1P2	CBL_-_119076576.23-P1P2	CBL_-_119076622.23-P1P2	gamma	gamma	GCGCCAACCTCCCGCCCACA	GTACTGCGCAGACTCCACCT	CBL_-_119076576.23-P1P2|CBL_-_119076622.23-P1P2
CCNA2	P1P2	CCNA2_-_122745207.23-P1P2	CCNA2_-_122745310.23-P1P2	gamma	gamma	GAGGGAGAAACAAACTGGCT	GAGTGAGCGAGGCTGTCCGA	CCNA2_-_122745207.23-P1P2|CCNA2_-_122745310.23-P1P2
CDKN1A	P1P2	CDKN1A_+_36646320.23-P1P2	CDKN1A_+_36646379.23-P1P2	gamma	gamma	GAGCCTGGCCGAGTTCCAGC	GCGCCCGGGACCGCCCTCCC	CDKN1A_+_36646320.23-P1P2|CDKN1A_+_36646379.23-P1P2
CDKN1B	P1P2	CDKN1B_+_12869867.23-P1P2	CDKN1B_-_12870178.23-P1P2	gamma	gamma	GAGCTCGCTAGGAGCCGGGG	GCGCGCTCGGGAACGAGGGG	CDKN1B_+_12869867.23-P1P2|CDKN1B_-_12870178.23-P1P2
CDKN1C	P1P2	CDKN1C_+_2907170.23-P1P2	CDKN1C_-_2907177.23-P1P2	gamma	gamma	GGGGTGTGCGCGCGGCCAAT	GgcccccgcgcaccgcccAT	CDKN1C_+_2907170.23-P1P2|CDKN1C_-_2907177.23-P1P2
CDKN2C	P1	CDKN2C_-_51435827.23-P1	CDKN2C_+_51435814.23-P1	gamma	gamma	GGCGAGGAGCCCCTCTCCAA	GAAACTGAGCCATTGGAGAG	CDKN2C_-_51435827.23-P1|CDKN2C_+_51435814.23-P1
CEBPA	P1P2	CEBPA_+_33793600.23-P1P2	CEBPA_+_33793774.23-P1P2	gamma	gamma	Gttgcgccgcggcctgcctg	GGCAGCCTCGGGATACTCCT	CEBPA_+_33793600.23-P1P2|CEBPA_+_33793774.23-P1P2
CEBPB	P1P2	CEBPB_-_48807249.23-P1P2	CEBPB_-_48807319.23-P1P2	gamma	gamma	GCCTGCCGCCGTCCTCCCGG	GaggggccggcgTGACGCAG	CEBPB_-_48807249.23-P1P2|CEBPB_-_48807319.23-P1P2
CEBPE	P1P2	CEBPE_+_23588348.23-P1P2	CEBPE_+_23588887.23-P1P2	gamma	gamma	GGGCAGCCGGAGCACCCCAA	GCCAGAGGAAGGCGTGTCAA	CEBPE_+_23588348.23-P1P2|CEBPE_+_23588887.23-P1P2
CERKL	P2	CERKL_+_182545493.23-P2	CERKL_+_182545425.23-P2	gamma	gamma	GCTGGACCGGGAAGACCATA	Gtgaggggagcggttgtcgg	CERKL_+_182545493.23-P2|CERKL_+_182545425.23-P2
CITED1	P1	CITED1_+_71526082.23-P1	CITED1_-_71526006.23-P1	gamma	gamma	GCGGGTGCCCGCTTCTCCCG	GGAGCCAGAGCGTCCAGATG	CITED1_+_71526082.23-P1|CITED1_-_71526006.23-P1
CNN1	P1	CNN1_+_11649605.23-P1	CNN1_+_11649451.23-P1	gamma	gamma	GGCGACCCGGGTCTCTTCCA	GGGGCAGCCTGCGTTATTCT	CNN1_+_11649605.23-P1|CNN1_+_11649451.23-P1
COL1A1	P1P2	COL1A1_-_48279239.23-P1P2	COL1A1_+_48279177.23-P1P2	gamma	gamma	GGGGCCAGAGGTGCTGTGGT	GGGGAGGCAGAGCTGCGAAG	COL1A1_-_48279239.23-P1P2|COL1A1_+_48279177.23-P1P2
COL2A1	P1P2	COL2A1_+_48398458.23-P1P2	COL2A1_-_48398489.23-P1P2	gamma	gamma	GCCACTCGGCGCACTAGGGG	GTGCGCCGAGTGGCCTGATC	COL2A1_+_48398458.23-P1P2|COL2A1_-_48398489.23-P1P2
DLX2	P1P2	DLX2_-_172967767.23-P1P2	DLX2_-_172967763.23-P1P2	gamma	gamma	GGGGGCGGGCGTCACATGGT	GCCAAGGGGCGGGCGTCACA	DLX2_-_172967767.23-P1P2|DLX2_-_172967763.23-P1P2
DUSP7	P1	DUSP7_+_52090712.23-P1	DUSP7_-_52090773.23-P1	gamma	gamma	GCCGCTGGTCTCCCGGGCTC	GCCTCCGCACCGTTGCCCCC	DUSP7_+_52090712.23-P1|DUSP7_-_52090773.23-P1
DUSP9	P1	DUSP9_+_152912527.23-P1	DUSP9_+_152912564.23-P1	gamma	gamma	GTCGGGTGGGACCTGCGAGT	GGgcgggccggTGAGCCAAC	DUSP9_+_152912527.23-P1|DUSP9_+_152912564.23-P1
EEF1A1	P1P2	EEF1A1_+_74230932.23-P1P2	EEF1A1_+_74230838.23-P1P2	gamma	gamma	GAGGCTCCGGTGCCCGTCAG	GAGGTGGCGCGGGGTAAACT	EEF1A1_+_74230932.23-P1P2|EEF1A1_+_74230838.23-P1P2
ELMSAN1	P1	ELMSAN1_+_74227182.23-P1	ELMSAN1_-_74227099.23-P1	gamma	gamma	GCCCGCCAGCAAAGCCATCG	GGGCGTCCTTAAACCTCAGG	ELMSAN1_+_74227182.23-P1|ELMSAN1_-_74227099.23-P1
EP300	P1P2	EP300_+_41487536.23-P1P2	EP300_-_41487607.23-P1P2	gamma	gamma	GCTCCCCCGGCGTCACCCTG	GCTAGGGCGGATCCCGTGAT	EP300_+_41487536.23-P1P2|EP300_-_41487607.23-P1P2
ETS2	P1P2	ETS2_+_40177604.23-P1P2	ETS2_+_40177667.23-P1P2	gamma	gamma	Ggaggagagggaacgcacga	Gcaggatggggagaagcggg	ETS2_+_40177604.23-P1P2|ETS2_+_40177667.23-P1P2
FEV	P1P2	FEV_+_219850336.23-P1P2	FEV_-_219850288.23-P1P2	gamma	gamma	GGACTGGAAGAAGGGCTCTA	GACTCTCTGCAAACAGTGAT	FEV_+_219850336.23-P1P2|FEV_-_219850288.23-P1P2
FOXA1	P1P2	FOXA1_-_38064567.23-P1P2	FOXA1_-_38064867.23-P1P2	gamma	gamma	GCTCGCACCTACAAAGCCCG	GGGCGGTGGCGTCGGAGACT	FOXA1_-_38064567.23-P1P2|FOXA1_-_38064867.23-P1P2
FOXA3	P1P2	FOXA3_-_46367461.23-P1P2	FOXA3_+_46367435.23-P1P2	gamma	gamma	GGCGCCTGAGGTCTGTCTCC	GAGACAGACCTCAGGCGCCG	FOXA3_-_46367461.23-P1P2|FOXA3_+_46367435.23-P1P2
FOXF1	P1P2	FOXF1_-_86544025.23-P1P2	FOXF1_+_86543930.23-P1P2	gamma	gamma	GGAGAAGTGGCCGCCGATGA	GGAGCTGCTGGATCCGCCGG	FOXF1_-_86544025.23-P1P2|FOXF1_+_86543930.23-P1P2
FOXL2	P1P2	FOXL2_+_138666175.23-P1P2	FOXL2_+_138666114.23-P1P2	gamma	gamma	GCAGCCCGCAGAGCGAGTAC	GCCCTGAGGCTCGCTGGGCG	FOXL2_+_138666175.23-P1P2|FOXL2_+_138666114.23-P1P2
FOXO3	P2	FOXO3_+_108882011.23-P2	FOXO3_-_108880798.23-P1	gamma	gamma	GTCCCTCCCGGGCTAGGCGG	GGCGGGAGCCCGCCGAGTCC	FOXO3_+_108882011.23-P2|FOXO3_-_108880798.23-P1
FOXO4	P1P2	FOXO4_-_70315963.23-P1P2	FOXO4_-_70315671.23-P1P2	gamma	gamma	GagggCAGCAATCCGGGTGG	GGTGGCACGACTGCAGAACT	FOXO4_-_70315963.23-P1P2|FOXO4_-_70315671.23-P1P2
GAB2	P1P2	GAB2_+_78128979.23-P1P2	GAB2_-_78129205.23-P1P2	gamma	gamma	GGCTGCAGCTGCTCCCCCGG	GTGGCGCTGGCGGGTGTGAG	GAB2_+_78128979.23-P1P2|GAB2_-_78129205.23-P1P2
GATA1	P1P2	GATA1_-_48644657.23-P1P2	GATA1_+_48644841.23-P1P2	gamma	gamma	GCCGGCCCCGCACAAATTAA	GGGGCGGGTCCCATGCTTGT	GATA1_-_48644657.23-P1P2|GATA1_+_48644841.23-P1P2
GRB10	P1	GRB10_+_50861243.23-P1	GRB10_+_50861426.23-P1	gamma	gamma	GGAGCAGGAAAAGTAGCcgg	GAGTCCCGAGGACAGCAGGA	GRB10_+_50861243.23-P1|GRB10_+_50861426.23-P1
HELZ2	P1	HELZ2_-_62205719.23-P1	HELZ2_-_62205700.23-P1	gamma	gamma	GGGGAAGCGCCAGCGAGCAG	GCCCGCTGCGAGGGAACCTC	HELZ2_-_62205719.23-P1|HELZ2_-_62205700.23-P1
HK2	P1P2	HK2_+_75060993.23-P1P2	HK2_+_75061021.23-P1P2	gamma	gamma	GGCTAAAGGCTGGGACGGAA	GgcgccTGAGATGGGACGTG	HK2_+_75060993.23-P1P2|HK2_+_75061021.23-P1P2
HNF4A	P1P2	HNF4A_+_43029791.23-P1P2	HNF4A_+_43029649.23-P1P2	gamma	gamma	GTGGTTAATCGGTCCCCCGC	GGGCAGGCATCATGACTCAC	HNF4A_+_43029791.23-P1P2|HNF4A_+_43029649.23-P1P2
HOXB9	P1P2	HOXB9_-_46703952.23-P1P2	HOXB9_-_46703948.23-P1P2	gamma	gamma	GCCGCACTCCATATCGAGGA	GCGCACCGCACTCCATATCG	HOXB9_-_46703952.23-P1P2|HOXB9_-_46703948.23-P1P2
HOXC13	P1P2	HOXC13_+_54332230.23-P1P2	HOXC13_-_54332182.23-P1P2	gamma	gamma	GGCCGACGCAAAGGGGTGTA	GGGTAGGGGGTCTGTCTCTC	HOXC13_+_54332230.23-P1P2|HOXC13_-_54332182.23-P1P2
ID3	P1P2	ID3_-_23886177.23-P1P2	ID3_-_23886154.23-P1P2	gamma	gamma	GGCCGCGGATTCAAAGAATG	GGGTCTGACGCCGAAGACCG	ID3_-_23886177.23-P1P2|ID3_-_23886154.23-P1P2
IER5L	P1P2	IER5L_+_131940706.23-P1P2	IER5L_+_131940722.23-P1P2	gamma	gamma	GTGGAGGCCCGGGGTCCGTT	GGAGGCAGCAGCGGCGTTGG	IER5L_+_131940706.23-P1P2|IER5L_+_131940722.23-P1P2
IGDCC3	P1P2	IGDCC3_+_65670505.23-P1P2	IGDCC3_-_65670887.23-P1P2	gamma	gamma	GCCGCGCAGCCGGGAATGTC	GGAGTCCTGGCGCTCCGCTG	IGDCC3_+_65670505.23-P1P2|IGDCC3_-_65670887.23-P1P2
IGF2BP1	P1P2	IGF2BP1_+_47074582.23-P1P2	IGF2BP1_-_47074659.23-P1P2	gamma	gamma	GTCACCCCCGGGGTAAACTG	GGGTTTGGCCGGAGGGCCGA	IGF2BP1_+_47074582.23-P1P2|IGF2BP1_-_47074659.23-P1P2
IGSF1	P1P2	IGSF1_+_130423449.23-P1P2	IGSF1_+_130423502.23-P1P2	gamma	gamma	GCTGCAGGGAGTCCGGAGAG	GAACTCTGAGAGACAGGCGA	IGSF1_+_130423449.23-P1P2|IGSF1_+_130423502.23-P1P2
IKZF3	P1P2	IKZF3_-_38020516.23-P1P2	IKZF3_-_38020596.23-P1P2	gamma	gamma	GCGGGATCCGGCAGCCGCGT	GTGGCTGGCGGCGGCTTTAA	IKZF3_-_38020516.23-P1P2|IKZF3_-_38020596.23-P1P2
INTS8	P1P2	INTS8_-_95835468.23-P1P2	INTS8_+_95835370.23-P1P2	gamma	gamma	GTGGTCCGAAGGCGCGGCGG	GTCCCGGTTGCCATAGGAGA	INTS8_-_95835468.23-P1P2|INTS8_+_95835370.23-P1P2
IRF1	P1P2	IRF1_-_131826612.23-P1P2	IRF1_+_131826642.23-P1P2	gamma	gamma	GCAGGCTGTTGTAGAGCTAG	GcgcccggccggAGAGGGTG	IRF1_-_131826612.23-P1P2|IRF1_+_131826642.23-P1P2
ISL2	P1P2	ISL2_-_76628842.23-P1P2	ISL2_+_76628966.23-P1P2	gamma	gamma	GCAGGCCCGGGGCATGAGAG	GTGGGGATCCAGGGGCTGAT	ISL2_-_76628842.23-P1P2|ISL2_+_76628966.23-P1P2
JUN	P1P2	JUN_+_59249856.23-P1P2	JUN_+_59249915.23-P1P2	gamma	gamma	GCCCAGAGAAGAATCTTCTA	GgaagggCCCGACTGTAGGA	JUN_+_59249856.23-P1P2|JUN_+_59249915.23-P1P2
KIAA0754	P1P2	KIAA0754_+_39874570.23-P1P2	KIAA0754_+_39874515.23-P1P2	gamma	gamma	GAGAGGAGCGACTCCGAGAG	GCCGAAGGAGGGGCTTCTGC	KIAA0754_+_39874570.23-P1P2|KIAA0754_+_39874515.23-P1P2
KIF2C	P1P2	KIF2C_+_45205298.23-P1P2	KIF2C_+_45205418.23-P1P2	gamma	gamma	GGGTCTGGGGCTCCCATTTC	GGCGCCCTGCGGAGCCTTGG	KIF2C_+_45205298.23-P1P2|KIF2C_+_45205418.23-P1P2
KLF1	P1P2	KLF1_+_12998353.23-P1P2	KLF1_+_12998453.23-P1P2	gamma	gamma	GGGGCTGTGGAGCCTCAATC	GTAGCAGCCTCCAACGTCTG	KLF1_+_12998353.23-P1P2|KLF1_+_12998453.23-P1P2
KLF16	P1P2	KLF16_+_1863856.23-P1P2	KLF16_+_1863850.23-P1P2	gamma	gamma	GGCTCCGGGCCTAAGACGCT	GGGCCTAAGACGCTAGGCGC	KLF16_+_1863856.23-P1P2|KLF16_+_1863850.23-P1P2
KLF3	P1P2	KLF3_-_38665525.23-P1P2	KLF3_-_38665573.23-P1P2	gamma	gamma	GCGCGCCTCGTGGGACAGGT	GGGAATAATGAGTGTCTGTC	KLF3_-_38665525.23-P1P2|KLF3_-_38665573.23-P1P2
KLF5	P1P2	KLF5_-_73632932.23-P1P2	KLF5_-_73632719.23-P1P2	gamma	gamma	GAAGTTGTGTACAAACTGCG	GCCCTACCTAGCTGCCTTCT	KLF5_-_73632932.23-P1P2|KLF5_-_73632719.23-P1P2
KMT2A	P1P2	KMT2A_-_118306877.23-P1P2	KMT2A_+_118307175.23-P1P2	gamma	gamma	GCGGAACCCGCGCTCTGCTC	GGAGAGGCGACAACACAGGG	KMT2A_-_118306877.23-P1P2|KMT2A_+_118307175.23-P1P2
LHX4	P1P2	LHX4_-_180199347.23-P1P2	LHX4_+_180199422.23-P1P2	gamma	gamma	GCGGGCGGCCGGCACGCgaa	GCGGGGTTGGTGCACATCCC	LHX4_-_180199347.23-P1P2|LHX4_+_180199422.23-P1P2
LOXL4	P1P2	LOXL4_-_100028126.23-P1P2	LOXL4_-_100028221.23-P1P2	gamma	gamma	Ggacacaggccaggtggcgg	GggAGCGGAGCTCTCGGGAA	LOXL4_-_100028126.23-P1P2|LOXL4_-_100028221.23-P1P2
LPAR5	P1	LPAR5_+_6745276.23-P1	LPAR5_+_6745209.23-P1	gamma	gamma	GCAGTCCGTGAAGGCCTCTG	GTGAGTGCACTGAGCTGGGA	LPAR5_+_6745276.23-P1|LPAR5_+_6745209.23-P1
LTA	P1P2	LTA_+_31539893.23-P1P2	LTA_+_31539859.23-P1P2	gamma	gamma	GAGGCCTAGGAGAGAACCAC	GGCGACTGAGTTCTGGGAAA	LTA_+_31539893.23-P1P2|LTA_+_31539859.23-P1P2
LYL1	P1P2	LYL1_+_13213830.23-P1P2	LYL1_-_13213730.23-P1P2	gamma	gamma	GAGGCCCGGGGTCCCTACAG	GTGACCCCGGAGGAAACCAG	LYL1_+_13213830.23-P1P2|LYL1_-_13213730.23-P1P2
MAML2	P1P2	MAML2_-_96076499.23-P1P2	MAML2_-_96076530.23-P1P2	gamma	gamma	GAGTAATCGCAGCCAGGCAC	GAACGCAGAGGGCCTCCCAG	MAML2_-_96076499.23-P1P2|MAML2_-_96076530.23-P1P2
MAML3	P1P2	MAML3_-_141075566.23-P1P2	MAML3_+_141075439.23-P1P2	gamma	gamma	GAGCCCAGAGCCGTCGGCGA	GGTGCCGCGCCCGCTCCTGC	MAML3_-_141075566.23-P1P2|MAML3_+_141075439.23-P1P2
MAP2K3	P1P2	MAP2K3_-_21187851.23-P1P2	MAP2K3_-_21188034.23-P1P2	gamma	gamma	GTGGCGGACTTGACAGAGAG	GGCGCTGCCCAGTCTGTCTC	MAP2K3_-_21187851.23-P1P2|MAP2K3_-_21188034.23-P1P2
MAP4K3	P1P2	MAP4K3_-_39664372.23-P1P2	MAP4K3_-_39664522.23-P1P2	gamma	gamma	GgAACCTGGTCACACCCACA	GGCGCAGCCGCGATCCCGGA	MAP4K3_-_39664372.23-P1P2|MAP4K3_-_39664522.23-P1P2
MAP4K5	P1P2	MAP4K5_-_50999426.23-P1P2	MAP4K5_+_50999383.23-P1P2	gamma	gamma	GGAACCAGAGTGCCGCCCTG	GTGCGGCCGGAGTGCTCGGG	MAP4K5_-_50999426.23-P1P2|MAP4K5_+_50999383.23-P1P2
MEIS1	P1P2	MEIS1_+_66662273.23-P1P2	MEIS1_+_66662171.23-P1P2	gamma	gamma	GGTGTGTTGCACAGGCGGAG	GGCAAGTAGGCTCCTCGGCA	MEIS1_+_66662273.23-P1P2|MEIS1_+_66662171.23-P1P2
MEIS2	P1P2	MEIS2_-_37392696.23-P1P2	MEIS2_+_37392729.23-P1P2	gamma	gamma	GGAGACACATCCCGGGAGTG	GCGCACTCGTTGCATATCAG	MEIS2_-_37392696.23-P1P2|MEIS2_+_37392729.23-P1P2
MEX3B	P1	MEX3B_-_82338513.23-P1	MEX3B_-_82338522.23-P1	gamma	gamma	GGCAGCCAGACGACTCCGGA	GCGACTCCGGAGGGGGACGA	MEX3B_-_82338513.23-P1|MEX3B_-_82338522.23-P1
MIDN	P2	MIDN_-_1248449.23-P2	MIDN_-_1249590.23-P1	gamma	gamma	GCAGCCGTCAAGGCGCCCCA	GGGCTCCGGGCGCTTATGAA	MIDN_-_1248449.23-P2|MIDN_-_1249590.23-P1
MYOD1	P1P2	MYOD1_-_17740881.23-P1P2	MYOD1_-_17741120.23-P1P2	gamma	gamma	GAGCCAAGTGCAGCCGCCTA	GGGCGCCTGGCGAGAAGCTA	MYOD1_-_17740881.23-P1P2|MYOD1_-_17741120.23-P1P2
NEUROD1	P1P2	NEUROD1_+_182545418.23-P1P2	NEUROD1_+_182545428.23-P1P2	gamma	gamma	Gagcggttgtcggaggaggg	Ggggtgaggggagcggttgt	NEUROD1_+_182545418.23-P1P2|NEUROD1_+_182545428.23-P1P2
NEUROG2	P1P2	NEUROG2_-_113437670.23-P1P2	NEUROG2_+_113437711.23-P1P2	gamma	gamma	GGGAGCTGGCGAAGCCGCAG	GCGCGAGCCACCAATCACAA	NEUROG2_-_113437670.23-P1P2|NEUROG2_+_113437711.23-P1P2
NPM1	P1P2	NPM1_-_170814567.23-P1P2	NPM1_-_170814750.23-P1P2	gamma	gamma	GGAGCGGGAGAGGACGTGGA	GCGCTTGCGCAGGACGGCTA	NPM1_-_170814567.23-P1P2|NPM1_-_170814750.23-P1P2
OTOP2	P1P2	OTOP2_-_72920177.23-P1P2	OTOP2_+_72920215.23-P1P2	gamma	gamma	GCCTGGCCGCACCGGGGTGA	GAGCCCGCTGGAGCCAGATA	OTOP2_-_72920177.23-P1P2|OTOP2_+_72920215.23-P1P2
PITX1	P1P2	PITX1_+_134370386.23-P1P2	PITX1_-_134370246.23-P1P2	gamma	gamma	GCGCCCCGGCGCTGGCTCGA	GCTGGCCTGCGAGTCCCGGG	PITX1_+_134370386.23-P1P2|PITX1_-_134370246.23-P1P2
PLK4	P1P2	PLK4_+_128801943.23-P1P2	PLK4_+_128801913.23-P1P2	gamma	gamma	GTTCTAGACTTCGGGGCCAA	GGCTGCGGAGAGTTTAGTTC	PLK4_+_128801943.23-P1P2|PLK4_+_128801913.23-P1P2
POU3F2	P1P2	POU3F2_-_99282447.23-P1P2	POU3F2_-_99282182.23-P1P2	gamma	gamma	GGCCGGCGCTGCCAagagag	GGCGGGGCCCATCCGAGAGA	POU3F2_-_99282447.23-P1P2|POU3F2_-_99282182.23-P1P2
PPP2R5D	P1P2	PPP2R5D_+_42952056.23-P1P2	PPP2R5D_+_42952065.23-P1P2	gamma	gamma	GAACCCAAGCTTGGCTAGGA	GATAAGGGGAAACCCAAGCT	PPP2R5D_+_42952056.23-P1P2|PPP2R5D_+_42952065.23-P1P2
PRDM1	P1P2	PRDM1_-_106534123.23-P1P2	PRDM1_-_106534113.23-P1P2	gamma	gamma	GGAAAGCCCTGGGCTCGGCC	GCAATCTGGGGGAAAGCCCT	PRDM1_-_106534123.23-P1P2|PRDM1_-_106534113.23-P1P2
PRTG	P1P2	PRTG_-_56035302.23-P1P2	PRTG_+_56035608.23-P1P2	gamma	gamma	GGGCGAGGCTGGTGCTCGGA	GGTGGCTCTGTCCCCGACGG	PRTG_-_56035302.23-P1P2|PRTG_+_56035608.23-P1P2
PTPN9	P1P2	PTPN9_+_75871797.23-P1P2	PTPN9_-_75871826.23-P1P2	gamma	gamma	GGACTGCGTCCTCGCTCCGC	GGCGAGGACGCAGTCCggga	PTPN9_+_75871797.23-P1P2|PTPN9_-_75871826.23-P1P2
RASA2	P1P2	RASA2_+_141205673.23-P1P2	RASA2_-_141205759.23-P1P2	gamma	gamma	GGGCTTGGGGCGCTGGCTAA	GAAGGCGGTGAATGGAGACC	RASA2_+_141205673.23-P1P2|RASA2_-_141205759.23-P1P2
RASA3	P1P2	RASA3_-_114898235.23-P1P2	RASA3_-_114898208.23-P1P2	gamma	gamma	GACCCGGGGGGCGCAGGGAT	GCAGGGACGGCGCTGGCGGG	RASA3_-_114898235.23-P1P2|RASA3_-_114898208.23-P1P2
RBPMS2	P1P2	RBPMS2_-_65067934.23-P1P2	RBPMS2_+_65067957.23-P1P2	gamma	gamma	GcccgccgcgcggTCTCCGG	GgccggggcgAGCCCACGGT	RBPMS2_-_65067934.23-P1P2|RBPMS2_+_65067957.23-P1P2
RCOR1	P1P2	RCOR1_-_103058837.23-P1P2	RCOR1_+_103058823.23-P1P2	gamma	gamma	GgAGCCAACCCCGCTGCCGC	GTGGACAGCCAGCGGCAGCG	RCOR1_-_103058837.23-P1P2|RCOR1_+_103058823.23-P1P2
RHOXF2	ENST00000371388.3	RHOXF2_+_119292286.23-ENST00000371388.3	RHOXF2_+_119292358.23-ENST00000371388.3	gamma	gamma	GCATGCGTTGTCCTGTAGAC	Gaagtggtgtagtagggtgt	RHOXF2_+_119292286.23-ENST00000371388.3|RHOXF2_+_119292358.23-ENST00000371388.3
RHOXF2B	ENST00000371402.2	RHOXF2B_-_119211886.23-ENST00000371402.2	RHOXF2B_-_119211814.23-ENST00000371402.2	gamma	gamma	GCATGCGTTGTCCTGTAGAC	Gaagtggtgtagtagggtgt	RHOXF2B_-_119211886.23-ENST00000371402.2|RHOXF2B_-_119211814.23-ENST00000371402.2
RREB1	P1P2	RREB1_-_7107845.23-P1P2	RREB1_+_7107896.23-P1P2	gamma	gamma	GCATCCCGGGATGGCAACTG	GGcggcggcggcgCTCGGAC	RREB1_-_7107845.23-P1P2|RREB1_+_7107896.23-P1P2
SAMD1	P1P2	SAMD1_-_14201639.23-P1P2	SAMD1_+_14201736.23-P1P2	gamma	gamma	GccctgcgcccgggACACTC	GGAGCGCAGGGTAAAggggg	SAMD1_-_14201639.23-P1P2|SAMD1_+_14201736.23-P1P2
SAMD4B	P1P2	SAMD4B_+_39832922.23-P1P2	SAMD4B_+_39832948.23-P1P2	gamma	gamma	GAGGTGTGAGCCGAGTAAGG	GGCGGCGAGGGCAGCCCGAA	SAMD4B_+_39832922.23-P1P2|SAMD4B_+_39832948.23-P1P2
SGK1	P1	SGK1_+_134496115.23-P1	SGK1_-_134496133.23-P1	gamma	gamma	GTAGCCGCCAGCAAACCGCG	GCCGCCTCGCGGTTTGCTGG	SGK1_+_134496115.23-P1|SGK1_-_134496133.23-P1
SLC38A3	P1P2	SLC38A3_+_50242586.23-P1P2	SLC38A3_-_50242557.23-P1P2	gamma	gamma	GCTGGTCGGGGGAATGGCGG	GTAGGGGCTCCCTAACGCTC	SLC38A3_+_50242586.23-P1P2|SLC38A3_-_50242557.23-P1P2
SLC4A1	P1P2	SLC4A1_+_42345722.23-P1P2	SLC4A1_+_42345700.23-P1P2	gamma	gamma	GCAGGAGAACCATGGGGACC	GAGGGCCCCGAGAGGCCTTG	SLC4A1_+_42345722.23-P1P2|SLC4A1_+_42345700.23-P1P2
SLC6A14	P1P2	SLC6A14_-_115567724.23-P1P2	SLC6A14_+_115567676.23-P1P2	gamma	gamma	GACACTACTGGACACCCAGG	GACCGGAAGGGACTAAAGTG	SLC6A14_-_115567724.23-P1P2|SLC6A14_+_115567676.23-P1P2
SLC7A1	P1P2	SLC7A1_-_30170044.23-P1P2	SLC7A1_+_30170111.23-P1P2	gamma	gamma	GCCCCAACCTGGGGTTCCCG	GTGGCGCGGTGCGCTCAGAT	SLC7A1_-_30170044.23-P1P2|SLC7A1_+_30170111.23-P1P2
SLC7A2	P1P2	SLC7A2_+_17354393.23-P1P2	SLC7A2_+_17354363.23-P1P2	gamma	gamma	GCCTGGAGCCGAGCACACGT	GAGCCCCGGGCTAGGCCGGT	SLC7A2_+_17354393.23-P1P2|SLC7A2_+_17354363.23-P1P2
SLC7A3	P1P2	SLC7A3_+_70151017.23-P1P2	SLC7A3_+_70151141.23-P1P2	gamma	gamma	GgtgtgtAGCGAGGAGGATT	GCACGCCAGGCTTGCTAGTG	SLC7A3_+_70151017.23-P1P2|SLC7A3_+_70151141.23-P1P2
SLC7A6	P1P2	SLC7A6_-_68298188.23-P1P2	SLC7A6_+_68298286.23-P1P2	gamma	gamma	GGAGGCCCCATCTAACTCCA	GCCACGGCCTGGCCGGTACG	SLC7A6_-_68298188.23-P1P2|SLC7A6_+_68298286.23-P1P2
SNAI1	P1P2	SNAI1_+_48599301.23-P1P2	SNAI1_+_48599319.23-P1P2	gamma	gamma	GCGGGGACTCCTCCGAGGCG	GTGGCGGTGAGAGCCCGGGC	SNAI1_+_48599301.23-P1P2|SNAI1_+_48599319.23-P1P2
SOS1	P1P2	SOS1_+_39348102.23-P1P2	SOS1_-_39348480.23-P1P2	gamma	gamma	GcggccgcggcggcACCTCA	GGTCCCTGGGCCCTTCGTTT	SOS1_+_39348102.23-P1P2|SOS1_-_39348480.23-P1P2
SOX1	P1P2	SOX1_+_112721256.23-P1P2	SOX1_-_112721304.23-P1P2	gamma	gamma	GCGGGGCCGTGCGCTCGGAG	GGCAGCGGGCAGCCCATCCC	SOX1_+_112721256.23-P1P2|SOX1_-_112721304.23-P1P2
SPI1	P1P2	SPI1_-_47400294.23-P1P2	SPI1_-_47400297.23-P1P2	gamma	gamma	GGGACTGAGAGGGATGACTT	GCTGAGAGGGATGACTTTGG	SPI1_-_47400294.23-P1P2|SPI1_-_47400297.23-P1P2
TBX3	P1P2	TBX3_-_115122171.23-P1P2	TBX3_+_115122285.23-P1P2	gamma	gamma	GTAACGTCGCAGCGCCGCAT	GAGCGAGCGAGCGAGCTCAG	TBX3_-_115122171.23-P1P2|TBX3_+_115122285.23-P1P2
TGFBR2	P1P2	TGFBR2_-_30648024.23-P1P2	TGFBR2_-_30647920.23-P1P2	gamma	gamma	GAAGGCTCTCGGGCGGAGAG	GGTGAGGGGCAGCTGAAAGT	TGFBR2_-_30648024.23-P1P2|TGFBR2_-_30647920.23-P1P2
TIPARP	P1P2	TIPARP_+_156392301.23-P1P2	TIPARP_+_156392198.23-P1P2	gamma	gamma	GTGGGCGGCCGGAGTTCGGT	GGAGGCGCGCGAGTTCTGTG	TIPARP_+_156392301.23-P1P2|TIPARP_+_156392198.23-P1P2
TP73	P1P2	TP73_-_3568813.23-P1P2	TP73_-_3568729.23-P1P2	gamma	gamma	GACCTGCTTCGGCCCTGCGT	GTCGGGCACAGAGTCGGCAC	TP73_-_3568813.23-P1P2|TP73_-_3568729.23-P1P2
TSC22D1	P1P2	TSC22D1_-_45011161.23-P1P2	TSC22D1_-_45011365.23-P1P2	gamma	gamma	GtctcCAGATCCCGCTCGTG	GGTGTCCCGCGGCTGCTTAA	TSC22D1_-_45011161.23-P1P2|TSC22D1_-_45011365.23-P1P2
TTC6	P1	TTC6_+_38064617.23-P1	TTC6_-_38064583.23-P1	gamma	gamma	GGCGCGCAGCGGTGAAgcgg	GCCGAGGTGCACCTGCAAgg	TTC6_+_38064617.23-P1|TTC6_-_38064583.23-P1
UBASH3A	P1P2	UBASH3A_-_43823852.23-P1P2	UBASH3A_+_43823760.23-P1P2	gamma	gamma	GTCCCGTGGTGGAAACAGTT	GAGGGACTTGGCTAGTATTC	UBASH3A_-_43823852.23-P1P2|UBASH3A_+_43823760.23-P1P2
WT1	P1P2	WT1_+_32457259.23-P1P2	WT1_-_32457253.23-P1P2	gamma	gamma	GGAGGAGGGTGTCTCCGAGA	GGGGGTGAGGGCGGGTCCGA	WT1_+_32457259.23-P1P2|WT1_-_32457253.23-P1P2
YAP1	P1P2	YAP1_+_101981365.23-P1P2	YAP1_-_101981092.23-P1P2	gamma	gamma	GcgccccggctccACTGGTC	GcgggcgggcgcgcAGAGGA	YAP1_+_101981365.23-P1P2|YAP1_-_101981092.23-P1P2
ZBTB10	P1P2	ZBTB10_-_81398128.23-P1P2	ZBTB10_+_81398406.23-P1P2	gamma	gamma	GGGCGCGGGTAGGTGCGTGT	GGGTAGCAGTAACCgctgga	ZBTB10_-_81398128.23-P1P2|ZBTB10_+_81398406.23-P1P2
ZBTB25	P1P2	ZBTB25_-_64971407.23-P1P2	ZBTB25_+_64971436.23-P1P2	gamma	gamma	GGACGCCGCAGCGAACTGGT	GCTGCCGCACCGCACTGAGC	ZBTB25_-_64971407.23-P1P2|ZBTB25_+_64971436.23-P1P2
ZEB2	P1	ZEB2_+_145277983.23-P1	ZEB2_+_145278050.23-P1	gamma	gamma	Gggaggcgaaggcgaaaggg	GATGATGCCAAAGGCTTGAC	ZEB2_+_145277983.23-P1|ZEB2_+_145278050.23-P1
ZMYM2	P1P2	ZMYM2_-_20532649.23-P1P2	ZMYM2_-_20532558.23-P1P2	gamma	gamma	Gggacccggccaggagtcga	GAGCCGAAGCGGGTTCGGTA	ZMYM2_-_20532649.23-P1P2|ZMYM2_-_20532558.23-P1P2
ZNF148	P1P2	ZNF148_-_125094287.23-P1P2	ZNF148_+_125094257.23-P1P2	gamma	gamma	GTCTGGCGCAGAGACCTGGC	GTCTCTGCGCCAGACGAGGG	ZNF148_-_125094287.23-P1P2|ZNF148_+_125094257.23-P1P2
ZNF281	P1P2	ZNF281_-_200379258.23-P1P2	ZNF281_-_200379343.23-P1P2	gamma	gamma	GCTGCGCCGCAGCTTCCGCC	GATTTGGAGCCCTGCTAAAA	ZNF281_-_200379258.23-P1P2|ZNF281_-_200379343.23-P1P2
ZNF296	P1P2	ZNF296_+_45579847.23-P1P2	ZNF296_-_45579862.23-P1P2	gamma	gamma	GACACTGCCTAGATTGAGTT	GCGGCGGCCTAACTCAATCT	ZNF296_+_45579847.23-P1P2|ZNF296_-_45579862.23-P1P2
ZNF362	P1P2	ZNF362_-_33721962.23-P1P2	ZNF362_-_33721930.23-P1P2	gamma	gamma	Gctgcgcagccggagaggcg	Gcccactcgcgggagccccc	ZNF362_-_33721962.23-P1P2|ZNF362_-_33721930.23-P1P2
A1BG	P1	A1BG_+_58859110.23-P1	A1BG_-_58859158.23-P1	predicted	predicted	GAAGACAGGGAAGATGAAgc	GTGGGCGCAGAGGGCTCCTC	A1BG_+_58859110.23-P1|A1BG_-_58859158.23-P1
A1BG	P2	A1BG_-_58864933.23-P2	A1BG_+_58865122.23-P2	predicted	predicted	GTGTCCTTCCCGGAAGGCGG	GAGCAGCTCCAGGTAGAGTG	A1BG_-_58864933.23-P2|A1BG_+_58865122.23-P2
A1CF	P1P2	A1CF_+_52645511.23-P1P2	A1CF_-_52645463.23-P1P2	predicted	predicted	GATCTGGTCAAAGGGCTGCA	GGGTTCAGTGGCTTTAGGTT	A1CF_+_52645511.23-P1P2|A1CF_-_52645463.23-P1P2
A2M	P1P2	A2M_-_9268620.23-P1P2	A2M_+_9268794.23-P1P2	predicted	predicted	GGAGGTCTCTGAACATTCTC	GATGTGAGAAGCACCATAAA	A2M_-_9268620.23-P1P2|A2M_+_9268794.23-P1P2
A2ML1	P1P2	A2ML1_-_8975026.23-P1P2	A2ML1_+_8975069.23-P1P2	predicted	predicted	GGAACCAGTATGGATGTTCC	GTAACCACCAGGTTAGGTGG	A2ML1_-_8975026.23-P1P2|A2ML1_+_8975069.23-P1P2
A3GALT2	ENST00000442999.3	A3GALT2_-_33786839.23-ENST00000442999.3	A3GALT2_+_33786914.23-ENST00000442999.3	predicted	predicted	GCCCACAGGAGCAGTCAGGA	GCAGGTGATTGGCCCCAAAA	A3GALT2_-_33786839.23-ENST00000442999.3|A3GALT2_+_33786914.23-ENST00000442999.3
A4GALT	P1P2	A4GALT_+_43117061.23-P1P2	A4GALT_+_43117057.23-P1P2	predicted	predicted	GGGGAGCGCTCCCTACCTGT	GGCGCTCCCTACCTGTTGGC	A4GALT_+_43117061.23-P1P2|A4GALT_+_43117057.23-P1P2
A4GNT	P1P2	A4GNT_+_137851419.23-P1P2	A4GNT_+_137851367.23-P1P2	predicted	predicted	GACAGGCAGGATTAGTGTGT	GTTCCCAAGTGGCTGTGTTT	A4GNT_+_137851419.23-P1P2|A4GNT_+_137851367.23-P1P2
AAAS	P1P2	AAAS_-_53715389.23-P1P2	AAAS_+_53715556.23-P1P2	predicted	predicted	GACGGCGAGGCGGAACTCAA	GGGGAAAAACAGTAGTCTCA	AAAS_-_53715389.23-P1P2|AAAS_+_53715556.23-P1P2
AACS	P1P2	AACS_-_125549890.23-P1P2	AACS_-_125549875.23-P1P2	predicted	predicted	GCGGAGGGTTACAGGCGGGA	GCGGCGCTGCACTCAGCGGA	AACS_-_125549890.23-P1P2|AACS_-_125549875.23-P1P2
AADAC	P1P2	AADAC_+_151531365.23-P1P2	AADAC_-_151531298.23-P1P2	predicted	predicted	GGGAAGTGGGGACGGGGTTT	GCCCGTCAGACCCAAGTCAC	AADAC_+_151531365.23-P1P2|AADAC_-_151531298.23-P1P2
AADACL2	P1P2	AADACL2_+_151451607.23-P1P2	AADACL2_-_151451485.23-P1P2	predicted	predicted	GCAGATCTCATAATTCATGA	GTTATTCAGTGCTGtcattt	AADACL2_+_151451607.23-P1P2|AADACL2_-_151451485.23-P1P2
AADACL3	P1P2	AADACL3_-_12775815.23-P1P2	AADACL3_+_12775987.23-P1P2	predicted	predicted	GTGGAGTTGAATCACAGAGT	GAGGATGTGGTTCTAGGACA	AADACL3_-_12775815.23-P1P2|AADACL3_+_12775987.23-P1P2
AADACL4	P1P2	AADACL4_+_12704396.23-P1P2	AADACL4_-_12704476.23-P1P2	predicted	predicted	GTCTCAGGGTAAGCACAAAA	GCCCAGAGAGAGTGAGGTGG	AADACL4_+_12704396.23-P1P2|AADACL4_-_12704476.23-P1P2
AADAT	P1P2	AADAT_+_171011507.23-P1P2	AADAT_-_171011434.23-P1P2	predicted	predicted	GAGTCCCAGTGACTGAGAGG	GAACCATCTGGCGGCGACTT	AADAT_+_171011507.23-P1P2|AADAT_-_171011434.23-P1P2
AAED1	P1P2	AAED1_-_99417731.23-P1P2	AAED1_-_99417754.23-P1P2	predicted	predicted	GCTGTCGGAGTGAACCCCAC	GGGTTCTGACTCAGCTCTCA	AAED1_-_99417731.23-P1P2|AAED1_-_99417754.23-P1P2
AAGAB	P1P2	AAGAB_+_67547095.23-P1P2	AAGAB_+_67547201.23-P1P2	predicted	predicted	GGGAGCGGAAGGGGGTCTAG	GGGAACGGCTACCTCCGCGG	AAGAB_+_67547095.23-P1P2|AAGAB_+_67547201.23-P1P2
AAK1	P1P2	AAK1_-_69870957.23-P1P2	AAK1_+_69870922.23-P1P2	predicted	predicted	GGCCGCCGGAAGTGCCCCTC	GCCGGCGGCGGTTCACTTCC	AAK1_-_69870957.23-P1P2|AAK1_+_69870922.23-P1P2
AAMDC	P1P2	AAMDC_-_77532073.23-P1P2	AAMDC_-_77531865.23-P1P2	predicted	predicted	GAATGAAAACAAGGGAAGCG	GACAGGAGGCGCTCTCAAGT	AAMDC_-_77532073.23-P1P2|AAMDC_-_77531865.23-P1P2
AAMP	P1P2	AAMP_-_219135073.23-P1P2	AAMP_-_219135004.23-P1P2	predicted	predicted	GTGACTCCGCCCCCAACTGG	GACCAATCACAGAGCGGCAT	AAMP_-_219135073.23-P1P2|AAMP_-_219135004.23-P1P2
AANAT	P1P2	AANAT_+_74463370.23-P1P2	AANAT_-_74463386.23-P1P2	predicted	predicted	Gacaagcccacctcttatgt	Gctccccccacataagaggt	AANAT_+_74463370.23-P1P2|AANAT_-_74463386.23-P1P2
AAR2	P1P2	AAR2_+_34824309.23-P1P2	AAR2_+_34824126.23-P1P2	predicted	predicted	GCCCTGGGTCGCGGGAAGAA	GGGTCACTAAAGCACAGCCA	AAR2_+_34824309.23-P1P2|AAR2_+_34824126.23-P1P2
AARD	P1P2	AARD_-_117950596.23-P1P2	AARD_-_117950667.23-P1P2	predicted	predicted	GCCCGCGTGCGACTTCTTCG	GGCTGGAGGACCTCAGACGA	AARD_-_117950596.23-P1P2|AARD_-_117950667.23-P1P2
AARS	P1P2	AARS_-_70323698.23-P1P2	AARS_+_70323525.23-P1P2	predicted	predicted	GCTCCCGGAGGTCGACATTT	GGATTCGTCCTCAGTTTGAC	AARS_-_70323698.23-P1P2|AARS_+_70323525.23-P1P2
AARS2	P1P2	AARS2_+_44281112.23-P1P2	AARS2_-_44281201.23-P1P2	predicted	predicted	GGGCCGCTGTAGGAAACGCC	GAAGCGATCGATTGGGTCGC	AARS2_+_44281112.23-P1P2|AARS2_-_44281201.23-P1P2
AARSD1	P1	AARSD1_+_41116733.23-P1	AARSD1_-_41116538.23-P1	predicted	predicted	GACATCCCTGGGGCCCCAAG	GGTGGGACAAACGTCATCAA	AARSD1_+_41116733.23-P1|AARSD1_-_41116538.23-P1
AARSD1	P2	AARSD1_+_41132260.23-P2	AARSD1_+_41132306.23-P2	predicted	predicted	GTCTGAAGACCCCACGGTGA	GTGCCCTGGTTCCAGCAGAT	AARSD1_+_41132260.23-P2|AARSD1_+_41132306.23-P2
AASDH	P1P2	AASDH_-_57253832.23-P1P2	AASDH_+_57253649.23-P1P2	predicted	predicted	GTCGCGCATGGTCTCGGACA	GGACGCGGAAGATTTACGTA	AASDH_-_57253832.23-P1P2|AASDH_+_57253649.23-P1P2
AASDHPPT	P1P2	AASDHPPT_+_105948188.23-P1P2	AASDHPPT_-_105948308.23-P1P2	predicted	predicted	GCAAGTAGGCGAGGCTTCGG	GAGTCGGGGGCGGGCTGGGA	AASDHPPT_+_105948188.23-P1P2|AASDHPPT_-_105948308.23-P1P2
AASS	P1P2	AASS_+_121784429.23-P1P2	AASS_+_121784363.23-P1P2	predicted	predicted	GCCGGGCATGACGTAGCAAC	GGCTGCTGATTGGCTACGGG	AASS_+_121784429.23-P1P2|AASS_+_121784363.23-P1P2
AATF	P1P2	AATF_+_35306199.23-P1P2	AATF_+_35306129.23-P1P2	predicted	predicted	GGGCGTTGCTAGCATGAAGG	GCGTGCGCGTGCGAGTGCGC	AATF_+_35306199.23-P1P2|AATF_+_35306129.23-P1P2
AATK	ENST00000326724.4	AATK_+_79139934.23-ENST00000326724.4	AATK_-_79140196.23-ENST00000326724.4	predicted	predicted	GCCCACCGGTGCGGGCTCTG	Gacacggaggggaggcatgg	AATK_+_79139934.23-ENST00000326724.4|AATK_-_79140196.23-ENST00000326724.4
ABAT	P1	ABAT_-_8768381.23-P1	ABAT_+_8768193.23-P1	predicted	predicted	GCCGTGGCGGGCGCACCCAT	GAGGACCCCCGTCAAGTTGT	ABAT_-_8768381.23-P1|ABAT_+_8768193.23-P1
ABAT	P2	ABAT_+_8807096.23-P2	ABAT_+_8807078.23-P2	predicted	predicted	GGGGACAAAGCAGAAATCCC	GCGGGCTTCAGATTCCTAAA	ABAT_+_8807096.23-P2|ABAT_+_8807078.23-P2
ABCA1	P1P2	ABCA1_+_107690622.23-P1P2	ABCA1_+_107690542.23-P1P2	predicted	predicted	GAACTCCCTAGATGTGTCGT	GGACTGAACTACATAAACAG	ABCA1_+_107690622.23-P1P2|ABCA1_+_107690542.23-P1P2
ABCA10	P1P2	ABCA10_+_67225208.23-P1P2	ABCA10_-_67225301.23-P1P2	predicted	predicted	GTCAGATGAAACTTTCTCAT	Ggtactagaaagtgttctaa	ABCA10_+_67225208.23-P1P2|ABCA10_-_67225301.23-P1P2
ABCA12	P1P2	ABCA12_-_216003484.23-P1P2	ABCA12_-_216003679.23-P1P2	predicted	predicted	GGTCTGCTCTAGCAGAGGCA	GTTGGGGGAAGAAACTATGT	ABCA12_-_216003484.23-P1P2|ABCA12_-_216003679.23-P1P2
ABCA13	P1P2	ABCA13_+_48210948.23-P1P2	ABCA13_-_48210919.23-P1P2	predicted	predicted	GGTGATGCAAGAGAGATTAC	GCAGCAGATGCCGAACAAGA	ABCA13_+_48210948.23-P1P2|ABCA13_-_48210919.23-P1P2
ABCA2	P1P2	ABCA2_+_139922862.23-P1P2	ABCA2_+_139922959.23-P1P2	predicted	predicted	Gggcggcgcgcgcagggtct	GAGGGTCCCCCGGCCTACGA	ABCA2_+_139922862.23-P1P2|ABCA2_+_139922959.23-P1P2
ABCA3	P1P2	ABCA3_-_2390945.23-P1P2	ABCA3_+_2391032.23-P1P2	predicted	predicted	GCAGCCACCCTGCGAGTACG	GAGGCCACCGCGCCCTCGCT	ABCA3_-_2390945.23-P1P2|ABCA3_+_2391032.23-P1P2
ABCA4	P1P2	ABCA4_-_94586785.23-P1P2	ABCA4_-_94586874.23-P1P2	predicted	predicted	GTAAGCCCTTAGTTGGGGAG	GACCAGGGAAATTGAGGTGG	ABCA4_-_94586785.23-P1P2|ABCA4_-_94586874.23-P1P2
ABCA5	P1P2	ABCA5_-_67323536.23-P1P2	ABCA5_-_67323373.23-P1P2	predicted	predicted	GCCCCTGAGCCACTAGAGTC	GGCAGAGCGCACCTGAGGGC	ABCA5_-_67323536.23-P1P2|ABCA5_-_67323373.23-P1P2
ABCA6	P1P2	ABCA6_-_67138222.23-P1P2	ABCA6_-_67138145.23-P1P2	predicted	predicted	GAGGGGGAAAACGGTAAACA	GGAAATGACTGTTCCGTGGT	ABCA6_-_67138222.23-P1P2|ABCA6_-_67138145.23-P1P2
ABCA7	P1	ABCA7_+_1039947.23-P1	ABCA7_+_1040027.23-P1	predicted	predicted	GCCTAGCCGGGTTTCTTAAA	GCGACCTGCCCGTCACTCAC	ABCA7_+_1039947.23-P1|ABCA7_+_1040027.23-P1
ABCA7	P2	ABCA7_-_1041049.23-P2	ABCA7_+_1041114.23-P2	predicted	predicted	GTAAGCCCAAACTCGGTCCC	GAGCCGTCCTCGCATCTGAT	ABCA7_-_1041049.23-P2|ABCA7_+_1041114.23-P2
ABCA8	P1P2	ABCA8_-_66951671.23-P1P2	ABCA8_-_66951528.23-P1P2	predicted	predicted	GCCTGGCTATATCATATTAT	GAAGACTGCTTTCAGAGTGG	ABCA8_-_66951671.23-P1P2|ABCA8_-_66951528.23-P1P2
ABCA9	P1P2	ABCA9_+_67057323.23-P1P2	ABCA9_-_67057286.23-P1P2	predicted	predicted	GAGAAAGGCTAGATTCTCCT	GGGGAGTTTGTAGTTGCAGA	ABCA9_+_67057323.23-P1P2|ABCA9_-_67057286.23-P1P2
ABCB1	ENST00000265724.3	ABCB1_-_87342674.23-ENST00000265724.3	ABCB1_+_87342707.23-ENST00000265724.3	predicted	predicted	GGGAGGAGCTACATGAACTA	GTCCACCCAAACTTATCCTT	ABCB1_-_87342674.23-ENST00000265724.3|ABCB1_+_87342707.23-ENST00000265724.3
ABCB10	P1P2	ABCB10_+_229694605.23-P1P2	ABCB10_-_229694617.23-P1P2	predicted	predicted	GAGCTGCAGTCCCCGGAGTG	GGCCTCTCCGCCCCACTCCG	ABCB10_+_229694605.23-P1P2|ABCB10_-_229694617.23-P1P2
ABCB11	P1P2	ABCB11_+_169888003.23-P1P2	ABCB11_-_169888002.23-P1P2	predicted	predicted	GGGTGAATCAGCAATTTCCA	GACCCTCTGAGGGTGTCAAC	ABCB11_+_169888003.23-P1P2|ABCB11_-_169888002.23-P1P2
ABCB4	P1P2	ABCB4_+_87105085.23-P1P2	ABCB4_-_87105166.23-P1P2	predicted	predicted	GGCCCTCGCCCTGGCTGCAA	GCTCTCCCCAGGCTAGGCGC	ABCB4_+_87105085.23-P1P2|ABCB4_-_87105166.23-P1P2
ABCB5	P1P2	ABCB5_-_20686802.23-P1P2	ABCB5_-_20686798.23-P1P2	predicted	predicted	GAGGGGTCACCCAACAAGGA	GTTCAAGGGGTCACCCAACA	ABCB5_-_20686802.23-P1P2|ABCB5_-_20686798.23-P1P2
ABCB6	P1P2	ABCB6_-_220083828.23-P1P2	ABCB6_-_220083771.23-P1P2	predicted	predicted	GTAGAGAAGCAGAGCCGGCT	GTGGCCAAATGTCTCCGAGG	ABCB6_-_220083828.23-P1P2|ABCB6_-_220083771.23-P1P2
ABCB7	P1P2	ABCB7_-_74376223.23-P1P2	ABCB7_-_74376157.23-P1P2	predicted	predicted	GCAGGGCCCCAGACCGGAAA	GGAGGATTATGGGACACTGG	ABCB7_-_74376223.23-P1P2|ABCB7_-_74376157.23-P1P2
ABCB8	P1P2	ABCB8_-_150725307.23-P1P2	ABCB8_-_150725517.23-P1P2	predicted	predicted	GCCAGTCGGGCCACACCCTT	GAAGGCGCGAGGGGGTTGTC	ABCB8_-_150725307.23-P1P2|ABCB8_-_150725517.23-P1P2
ABCB9	P1	ABCB9_-_123451165.23-P1	ABCB9_-_123451127.23-P1	predicted	predicted	GGGGCGGGGCCCCCGAGGAG	GGCGGGGCCTCAGGAGGAGT	ABCB9_-_123451165.23-P1|ABCB9_-_123451127.23-P1
ABCB9	P2	ABCB9_-_123465891.23-P2	ABCB9_+_123465931.23-P2	predicted	predicted	GAGGAGGCGCAGTTACTACC	GCTCAGGCCCGGCTGCACAG	ABCB9_-_123465891.23-P2|ABCB9_+_123465931.23-P2
ABCC1	P1P2	ABCC1_-_16043343.23-P1P2	ABCC1_-_16043113.23-P1P2	predicted	predicted	GCGCCGAGAGGTGGCTGGTC	GAAGGCGCCCGGTACACTCC	ABCC1_-_16043343.23-P1P2|ABCC1_-_16043113.23-P1P2
ABCC10	P1P2	ABCC10_+_43395315.23-P1P2	ABCC10_-_43395305.23-P1P2	predicted	predicted	GTGGCACCCCACCTAGAGGT	GTGGGCGTGGCGAATAGCGC	ABCC10_+_43395315.23-P1P2|ABCC10_-_43395305.23-P1P2
ABCC11	P1	ABCC11_+_48278372.23-P1	ABCC11_-_48278290.23-P1	predicted	predicted	GCTGGTGCGCATGGTGGAGC	GTGACAGCCCCCAGTGCGAA	ABCC11_+_48278372.23-P1|ABCC11_-_48278290.23-P1
ABCC11	P2	ABCC11_+_48281632.23-P2	ABCC11_+_48281540.23-P2	predicted	predicted	GGCTTGAAAGGATATTGTAC	GCTACTAAGCAGAAAAATGC	ABCC11_+_48281632.23-P2|ABCC11_+_48281540.23-P2
ABCC12	ENST00000311303.3	ABCC12_+_48181025.23-ENST00000311303.3	ABCC12_-_48181024.23-ENST00000311303.3	predicted	predicted	GACAGAAGTGTGGGGAATGT	GGGACCAGCCACATCTGGAC	ABCC12_+_48181025.23-ENST00000311303.3|ABCC12_-_48181024.23-ENST00000311303.3
ABCC2	P1P2	ABCC2_-_101542361.23-P1P2	ABCC2_+_101542318.23-P1P2	predicted	predicted	GACAGAGGCCTCTTGTACTT	GAGGAGTGGCCATACATAAA	ABCC2_-_101542361.23-P1P2|ABCC2_+_101542318.23-P1P2
ABCC3	P1P2	ABCC3_-_48712176.23-P1P2	ABCC3_-_48712142.23-P1P2	predicted	predicted	GACCCAGAGGCACTGGGGTA	GGTCGCAACCCGCGGGACGG	ABCC3_-_48712176.23-P1P2|ABCC3_-_48712142.23-P1P2
ABCC4	P1P2	ABCC4_-_95953856.23-P1P2	ABCC4_+_95953902.23-P1P2	predicted	predicted	GGACCGACGGGTGACGCGGC	GCACCCCTGGGCGTAGCTCT	ABCC4_-_95953856.23-P1P2|ABCC4_+_95953902.23-P1P2
ABCC5	P1P2	ABCC5_+_183735858.23-P1P2	ABCC5_+_183735865.23-P1P2	predicted	predicted	GCGGGAGCTCGGTGGGAAGA	GACAGAGCCGGGAGCTCGGT	ABCC5_+_183735858.23-P1P2|ABCC5_+_183735865.23-P1P2
ABCC6	ENST00000205557.7	ABCC6_-_16317856.23-ENST00000205557.7	ABCC6_-_16317851.23-ENST00000205557.7	predicted	predicted	GATTATGCAATGGGCTGGCA	GAGAAGATTATGCAATGGGC	ABCC6_-_16317856.23-ENST00000205557.7|ABCC6_-_16317851.23-ENST00000205557.7
ABCC8	P1P2	ABCC8_+_17498524.23-P1P2	ABCC8_-_17498665.23-P1P2	predicted	predicted	GCAAGCGTAGCAGGGCCGGT	GGCAGGCTAAGATGGGGAGT	ABCC8_+_17498524.23-P1P2|ABCC8_-_17498665.23-P1P2
ABCC9	P1P2	ABCC9_-_22094763.23-P1P2	ABCC9_+_22094549.23-P1P2	predicted	predicted	GCAGCCGCCGCGCTATCGAA	GCCAAATCCGCTTCCTTACG	ABCC9_-_22094763.23-P1P2|ABCC9_+_22094549.23-P1P2
ABCD1	P1P2	ABCD1_+_152990083.23-P1P2	ABCD1_+_152990254.23-P1P2	predicted	predicted	GGCCGCGCGGACTAGAGAAG	GTTCCCcaggggcgagtcgg	ABCD1_+_152990083.23-P1P2|ABCD1_+_152990254.23-P1P2
ABCD2	P1P2	ABCD2_-_40013834.23-P1P2	ABCD2_-_40013800.23-P1P2	predicted	predicted	GATCTGCTGGCGAACAAAAC	GAAAATGTCTATTTTTGGAG	ABCD2_-_40013834.23-P1P2|ABCD2_-_40013800.23-P1P2
ABCD3	P1P2	ABCD3_-_94883730.23-P1P2	ABCD3_+_94883803.23-P1P2	predicted	predicted	GGCAGCACTGACGCCTCGCA	GCGTGGGCGGAACAGTTCCC	ABCD3_-_94883730.23-P1P2|ABCD3_+_94883803.23-P1P2
ABCD4	P1P2	ABCD4_+_74769817.23-P1P2	ABCD4_-_74769806.23-P1P2	predicted	predicted	GGAAGTCTCCCAGAAAATAT	GGTGGACTCGGCTGACCCGG	ABCD4_+_74769817.23-P1P2|ABCD4_-_74769806.23-P1P2
ABCE1	P1P2	ABCE1_+_146019382.23-P1P2	ABCE1_-_146019352.23-P1P2	predicted	predicted	GGAGGCGGAACCCTGGAGGT	GCGCCAACGGCGTTGAACAA	ABCE1_+_146019382.23-P1P2|ABCE1_-_146019352.23-P1P2
ABCF1	P1	ABCF1_+_30539093.23-P1	ABCF1_+_30539115.23-P1	predicted	predicted	GCGTGGCCCTGGTTCAGTGG	GAGCTTCGCCGTCATCTCGG	ABCF1_+_30539093.23-P1|ABCF1_+_30539115.23-P1
ABCF1	P2	ABCF1_+_30546203.23-P2	ABCF1_-_30546149.23-P2	predicted	predicted	GGAAGTCAGTAGGATGGTCA	GCGCCCCAAAACCCCGCGGA	ABCF1_+_30546203.23-P2|ABCF1_-_30546149.23-P2
ABCF2	P1P2	ABCF2_+_150924501.23-P1P2	ABCF2_-_150924475.23-P1P2	predicted	predicted	GCCCGCTAGCAGAGAGCTCT	GGACGCCATCAGGATGCGCG	ABCF2_+_150924501.23-P1P2|ABCF2_-_150924475.23-P1P2
ABCF3	P1P2	ABCF3_+_183903847.23-P1P2	ABCF3_+_183903666.23-P1P2	predicted	predicted	GGGAGTGCGCAGAGCCCGGT	GGGGAGCTCAAGGTTTATCG	ABCF3_+_183903847.23-P1P2|ABCF3_+_183903666.23-P1P2
ABCG1	P1P2	ABCG1_+_43639053.23-P1P2	ABCG1_-_43639082.23-P1P2	predicted	predicted	GGAGGCCTCGCAGGCGGCAT	GGCCTGCGAGGCCTCGGCTC	ABCG1_+_43639053.23-P1P2|ABCG1_-_43639082.23-P1P2
ABCG2	P1P2	ABCG2_-_89079989.23-P1P2	ABCG2_-_89080000.23-P1P2	predicted	predicted	GGGGAGACCCGGACATCCAG	GACATCCAGGGGACGAGCTC	ABCG2_-_89079989.23-P1P2|ABCG2_-_89080000.23-P1P2
ABCG4	P1P2	ABCG4_+_119019549.23-P1P2	ABCG4_+_119019678.23-P1P2	predicted	predicted	GAGAGCTGGAGTCACTCCGT	GagcccgcggggggcgAGGA	ABCG4_+_119019549.23-P1P2|ABCG4_+_119019678.23-P1P2
ABCG5	P1P2	ABCG5_+_44066240.23-P1P2	ABCG5_-_44066283.23-P1P2	predicted	predicted	GCACTCACCGAGGTATCCTG	GAGCAATGGGAAGTCGGCCC	ABCG5_+_44066240.23-P1P2|ABCG5_-_44066283.23-P1P2
ABCG8	P1P2	ABCG8_+_44065865.23-P1P2	ABCG8_-_44066042.23-P1P2	predicted	predicted	GCCCAACTGAAGCCACTCTG	GAACACACACGTTTGTAGGT	ABCG8_+_44065865.23-P1P2|ABCG8_-_44066042.23-P1P2
ABHD1	P1P2	ABHD1_-_27346534.23-P1P2	ABHD1_-_27346571.23-P1P2	predicted	predicted	GGCACAGCCAAGAACCGCGG	GAGGGCGGGAGGCCATTCGC	ABHD1_-_27346534.23-P1P2|ABHD1_-_27346571.23-P1P2
ABHD10	P1P2	ABHD10_+_111697814.23-P1P2	ABHD10_-_111697877.23-P1P2	predicted	predicted	GTGCGCTTCAGGCTGGAAGG	GGCGTAGCGTGTCCCTCAGT	ABHD10_+_111697814.23-P1P2|ABHD10_-_111697877.23-P1P2
ABHD11	P1P2	ABHD11_+_73153286.23-P1P2	ABHD11_+_73153239.23-P1P2	predicted	predicted	Ggcggggccggactgttctc	Ggcggagaatcccgcgatgg	ABHD11_+_73153286.23-P1P2|ABHD11_+_73153239.23-P1P2
ABHD12	P1P2	ABHD12_+_25371576.23-P1P2	ABHD12_-_25371679.23-P1P2	predicted	predicted	GCTCCTTGGAACTAGAGAGG	GCAGCGGCGCGTCATCTGCA	ABHD12_+_25371576.23-P1P2|ABHD12_-_25371679.23-P1P2
ABHD12B	P1P2	ABHD12B_+_51338757.23-P1P2	ABHD12B_+_51338760.23-P1P2	predicted	predicted	GAGGCAGGCTGGTACGGCGG	GGTCAGGCAGGCTGGTACGG	ABHD12B_+_51338757.23-P1P2|ABHD12B_+_51338760.23-P1P2
ABHD13	P1P2	ABHD13_-_108870764.23-P1P2	ABHD13_+_108870692.23-P1P2	predicted	predicted	GCGGGCAGGGTTCCCACTCC	GCAGTGAGCCCCCGCGACGG	ABHD13_-_108870764.23-P1P2|ABHD13_+_108870692.23-P1P2
ABHD14A	P1P2	ABHD14A_-_52008686.23-P1P2	ABHD14A_+_52009025.23-P1P2	predicted	predicted	GCAGCCCAGGCTCTGACCGT	GACCGAGTCGTCTGCGTGGA	ABHD14A_-_52008686.23-P1P2|ABHD14A_+_52009025.23-P1P2
ABHD14B	P1	ABHD14B_+_52008190.23-P1	ABHD14B_-_52008218.23-P1	predicted	predicted	GTGGGGCATGTGAGACCGAG	GGTCTCACATGCCCCAAACG	ABHD14B_+_52008190.23-P1|ABHD14B_-_52008218.23-P1
ABHD14B	P2	ABHD14B_+_52017455.23-P2	ABHD14B_-_52017521.23-P2	predicted	predicted	GTGGCCGAGGCCGGATGTCG	GCCTGAGCCTGCGACCTCGC	ABHD14B_+_52017455.23-P2|ABHD14B_-_52017521.23-P2
ABHD15	P1P2	ABHD15_-_27894474.23-P1P2	ABHD15_-_27894315.23-P1P2	predicted	predicted	Gccggctcccgggaccccgt	GGGGAGAGCGGTGTTGGCCA	ABHD15_-_27894474.23-P1P2|ABHD15_-_27894315.23-P1P2
ABHD16A	P1P2	ABHD16A_+_31671198.23-P1P2	ABHD16A_+_31671120.23-P1P2	predicted	predicted	GACTGCGCGAAACTCTTCTC	GAGGGCACACAACACCTCAG	ABHD16A_+_31671198.23-P1P2|ABHD16A_+_31671120.23-P1P2
ABHD16B	P1P2	ABHD16B_-_62492639.23-P1P2	ABHD16B_-_62492635.23-P1P2	predicted	predicted	GTAGCTGCTCAAATCATGGG	GACAGTAGCTGCTCAAATCA	ABHD16B_-_62492639.23-P1P2|ABHD16B_-_62492635.23-P1P2
ABHD17A	P1P2	ABHD17A_-_1885642.23-P1P2	ABHD17A_-_1885670.23-P1P2	predicted	predicted	GTGTGGGCGGGGCCAAACTT	GTCACTTGGggacccggaat	ABHD17A_-_1885642.23-P1P2|ABHD17A_-_1885670.23-P1P2
ABHD17B	P1P2	ABHD17B_+_74526310.23-P1P2	ABHD17B_+_74526189.23-P1P2	predicted	predicted	GGTAGTCCATCAAATCAAAG	GCCGGGCGGCCTCTGATTGG	ABHD17B_+_74526310.23-P1P2|ABHD17B_+_74526189.23-P1P2
ABHD17C	P1P2	ABHD17C_-_80987551.23-P1P2	ABHD17C_+_80987533.23-P1P2	predicted	predicted	GgcgccTCGCCTGGGTTCCG	GCGGCCCCGGAACCCAGGCG	ABHD17C_-_80987551.23-P1P2|ABHD17C_+_80987533.23-P1P2
ABHD2	P1P2	ABHD2_-_89631642.23-P1P2	ABHD2_+_89631401.23-P1P2	predicted	predicted	GTGGCAGAAGCGGTCGTCAG	GGATAAGGCCAGCCCGGAGT	ABHD2_-_89631642.23-P1P2|ABHD2_+_89631401.23-P1P2
ABHD3	P1P2	ABHD3_-_19284965.23-P1P2	ABHD3_-_19284953.23-P1P2	predicted	predicted	GGGGCGATGGGGATCCCCAA	GCTAGGTCGCAGTGGGCGAT	ABHD3_-_19284965.23-P1P2|ABHD3_-_19284953.23-P1P2
ABHD4	P1P2	ABHD4_+_23067128.23-P1P2	ABHD4_+_23067075.23-P1P2	predicted	predicted	GGGGAGGCCGCGGGGAGCAA	GCGGGCCGGCGGTCGGCGGT	ABHD4_+_23067128.23-P1P2|ABHD4_+_23067075.23-P1P2
ABHD5	P1P2	ABHD5_-_43732268.23-P1P2	ABHD5_-_43732293.23-P1P2	predicted	predicted	GTACACCCGGGAGCGTCGGG	GAACTAGTGCATGCTGGCTG	ABHD5_-_43732268.23-P1P2|ABHD5_-_43732293.23-P1P2
ABHD6	P1P2	ABHD6_-_58223402.23-P1P2	ABHD6_+_58223253.23-P1P2	predicted	predicted	GGAACTGGGGATAAGCGCCC	GGGATCGCCTACAGAGGTAC	ABHD6_-_58223402.23-P1P2|ABHD6_+_58223253.23-P1P2
ABHD8	P1P2	ABHD8_-_17414352.23-P1P2	ABHD8_+_17414344.23-P1P2	predicted	predicted	GAGAGGCGGCAATTCCGTAG	GCCAGAGCCCGCCTCCACTA	ABHD8_-_17414352.23-P1P2|ABHD8_+_17414344.23-P1P2
ABI1	P1P2	ABI1_+_27149978.23-P1P2	ABI1_+_27149957.23-P1P2	predicted	predicted	GCGAGAGAACGAGGTTCAGG	GGCTGCACGAAGGGGGTGGA	ABI1_+_27149978.23-P1P2|ABI1_+_27149957.23-P1P2
ABI2	P1P2	ABI2_+_204192895.23-P1P2	ABI2_+_204193039.23-P1P2	predicted	predicted	GCTAGCGACGGCGGGGGTAG	GAGCCGACGGACTCCGAGGA	ABI2_+_204192895.23-P1P2|ABI2_+_204193039.23-P1P2
ABI3	P1P2	ABI3_+_47287750.23-P1P2	ABI3_-_47287527.23-P1P2	predicted	predicted	GAGAGGAAACTGGTCGGCTG	GACCCCTCTTGCTGCCGCAT	ABI3_+_47287750.23-P1P2|ABI3_-_47287527.23-P1P2
ABI3BP	P1P2	ABI3BP_+_100712307.23-P1P2	ABI3BP_-_100712323.23-P1P2	predicted	predicted	GGCCGCCCGCCTCTGTCACT	GTGTCTCCCAGTGACAGAGG	ABI3BP_+_100712307.23-P1P2|ABI3BP_-_100712323.23-P1P2
ABL1	ENST00000372348.2	ABL1_+_133588940.23-ENST00000372348.2	ABL1_+_133589018.23-ENST00000372348.2	predicted	predicted	GGGAGACCCCTTGACAGCAA	GCTGAGACTAAGGGGGCCGT	ABL1_+_133588940.23-ENST00000372348.2|ABL1_+_133589018.23-ENST00000372348.2
ABL2	P1	ABL2_-_179112398.23-P1	ABL2_-_179112762.23-P1	predicted	predicted	GGCAAAAGACTGAGTCAGAA	GTGGCTCTATAGCTTAATAA	ABL2_-_179112398.23-P1|ABL2_-_179112762.23-P1
ABL2	P2	ABL2_+_179199028.23-P2	ABL2_+_179199071.23-P2	predicted	predicted	GGAGGTGCGGCGACAGGACG	GCGCGGGAGGGGGTCGGCTG	ABL2_+_179199028.23-P2|ABL2_+_179199071.23-P2
[truncated: 21,267 more rows]

## Sheet: 5-6 library
gene	transcript	sgID_A	sgID_B	source_A	source_B	protospacer_A	protospacer_B	sgID_AB
[truncated: 21,498 more rows]
