# Supplementary material for: Maximizing CRISPRi efficacy and accessibility with dual-sgRNA libraries and optimal effectors
Source: eLife. 2022 Dec 28;11:e81856. doi: 10.7554/eLife.81856 (PMC9829409; doi:10.7554/eLife.81856)
Supplement: Supplementary file 10. [file elife-81856-supp10.xlsx]

## Sheet: Supplementary_file_14
gene	transcript	sgID_A	protospacer_A	rank_A	sgID_B	protospacer_B	rank_B	sgID_AB
Gimap6	P1P2	Gimap6_-_48707984.23-P1P2	GGGCTGGCTGACAGGCAAGA	1	Gimap6_+_48707993.23-P1P2	GACCAGTGCTACTGAAGTCG	2	Gimap6_-_48707984.23-P1P2|Gimap6_+_48707993.23-P1P2
Nckap5	ENSMUST00000112583.1,ENSMUST00000094609.3	Nckap5_+_126830728.23-ENSMUST00000112583.1,ENSMUST00000094609.3	GGATCACGAGGAGAACTTCG	1	Nckap5_+_126830353.23-ENSMUST00000112583.1,ENSMUST00000094609.3	GCCCCGGAGCAGGCTAACGG	2	Nckap5_+_126830728.23-ENSMUST00000112583.1,ENSMUST00000094609.3|Nckap5_+_126830353.23-ENSMUST00000112583.1,ENSMUST00000094609.3
Adamts8	P1P2	Adamts8_-_30942574.23-P1P2	GAGGAAGGAGGCGACTGCAC	1	Adamts8_+_30942578.23-P1P2	GCGCGAGCGCGCGTCCTCCG	2	Adamts8_-_30942574.23-P1P2|Adamts8_+_30942578.23-P1P2
4931429L15Rik	P1P2	4931429L15Rik_-_46315915.23-P1P2	GGTGTTCTAAACAGGCTGAA	1	4931429L15Rik_-_46315587.23-P1P2	GGAAGGAGGCGACCCACTGG	2	4931429L15Rik_-_46315915.23-P1P2|4931429L15Rik_-_46315587.23-P1P2
Asxl1	P1P2	Asxl1_+_153346068.23-P1P2	GCTGCGTCAGTCGCCCACGG	1	Asxl1_+_153346062.23-P1P2	GCAGTCGCCCACGGTGGCAG	2	Asxl1_+_153346068.23-P1P2|Asxl1_+_153346062.23-P1P2
Dnmt3l	P1P2	Dnmt3l_+_78054903.23-P1P2	GTGGGCTCTGTCCCCAGAGT	1	Dnmt3l_-_78054914.23-P1P2	GATGATAGATCCCCACTCTG	2	Dnmt3l_+_78054903.23-P1P2|Dnmt3l_-_78054914.23-P1P2
Creb1	P1P2	Creb1_-_64532904.23-P1P2	GGCTGGGAGAAGCGGAGTGT	1	Creb1_-_64532855.23-P1P2	GGCTGCGGCTCCTCAGTCGG	2	Creb1_-_64532904.23-P1P2|Creb1_-_64532855.23-P1P2
Ermard	ENSMUST00000097393.3	Ermard_+_15042095.23-ENSMUST00000097393.3	GACAGTGCTTAGACACTTGA	1	Ermard_-_15042138.23-ENSMUST00000097393.3	GTCTACGCATAGAGCTATTA	2	Ermard_+_15042095.23-ENSMUST00000097393.3|Ermard_-_15042138.23-ENSMUST00000097393.3
Xpo6	P1P2	Xpo6_-_126200272.23-P1P2	GGCCTCAGCCGAGACTGAAG	1	Xpo6_+_126200342.23-P1P2	GCCCGCCGCGAGGACAGAGG	2	Xpo6_-_126200272.23-P1P2|Xpo6_+_126200342.23-P1P2
Olfr178	ENSMUST00000058564.3	Olfr178_-_58890186.23-ENSMUST00000058564.3	GCCCACCAGGATGAATTGTG	1	Olfr178_-_58889745.23-ENSMUST00000058564.3	GAGACACCCTACATGAAGAA	2	Olfr178_-_58890186.23-ENSMUST00000058564.3|Olfr178_-_58889745.23-ENSMUST00000058564.3
Tmcc2	P1P2	Tmcc2_-_132367824.23-P1P2	GAAGGAGCCTGTAGAGTCCT	1	Tmcc2_+_132367809.23-P1P2	GAGTGGACCTAGGACTCTAC	2	Tmcc2_-_132367824.23-P1P2|Tmcc2_+_132367809.23-P1P2
2210016F16Rik	P1P2	2210016F16Rik_+_58385203.23-P1P2	GGGACCTCAGACCCGGAAGT	1	2210016F16Rik_-_58385189.23-P1P2	GGGAGCCTCGGCCTCCGCCA	2	2210016F16Rik_+_58385203.23-P1P2|2210016F16Rik_-_58385189.23-P1P2
Olfr843	ENSMUST00000061365.2	Olfr843_+_19249393.23-ENSMUST00000061365.2	GGTAATATGCAGTAGCAACA	1	Olfr843_+_19249438.23-ENSMUST00000061365.2	GCCAAAACAATAACAAAATT	2	Olfr843_+_19249393.23-ENSMUST00000061365.2|Olfr843_+_19249438.23-ENSMUST00000061365.2
Olfr1167	ENSMUST00000099832.2	Olfr1167_-_88150039.23-ENSMUST00000099832.2	GACTTTCCAGATTAAACATG	1	Olfr1167_-_88150069.23-ENSMUST00000099832.2	GAAAATGAGACTTATGGAAC	2	Olfr1167_-_88150039.23-ENSMUST00000099832.2|Olfr1167_-_88150069.23-ENSMUST00000099832.2
Adc	P1P2	Adc_-_128962214.23-P1P2	GCGAGGCCCCTGCTGAGAGG	1	Adc_+_128962087.23-P1P2	GGCCCCCGCGAAGGAGGACG	2	Adc_-_128962214.23-P1P2|Adc_+_128962087.23-P1P2
Ralyl	ENSMUST00000108372.2	Ralyl_+_13946445.23-ENSMUST00000108372.2	GGAAGTAATTGGTTTGACCA	1	Ralyl_+_13946613.23-ENSMUST00000108372.2	GACTACCAGCAGCTATCGGA	2	Ralyl_+_13946445.23-ENSMUST00000108372.2|Ralyl_+_13946613.23-ENSMUST00000108372.2
Clock	P1P2	Clock_+_76304699.23-P1P2	GGGAGAGAGGAAACCCCGGA	1	Clock_-_76304486.23-P1P2	GCGGGAGCCGGCAGCACCAG	2	Clock_+_76304699.23-P1P2|Clock_-_76304486.23-P1P2
Dab2ip	ENSMUST00000112983.1	Dab2ip_-_35696754.23-ENSMUST00000112983.1	GCACAGAGCTGGACTGACTG	1	Dab2ip_+_35696769.23-ENSMUST00000112983.1	GAGAGTAGCCATCTAGCCAC	2	Dab2ip_-_35696754.23-ENSMUST00000112983.1|Dab2ip_+_35696769.23-ENSMUST00000112983.1
Kcnd2	P1P2	Kcnd2_+_21215420.23-P1P2	GCCTGGCAAAGTGCGCACCG	1	Kcnd2_+_21215437.23-P1P2	GCTCGCCCGCGGTACATACC	2	Kcnd2_+_21215420.23-P1P2|Kcnd2_+_21215437.23-P1P2
Hsph1	P1P2	Hsph1_+_149636203.23-P1P2	GGGCGGCGGCTGCGTGAGAG	1	Hsph1_+_149636050.23-P1P2	GCGGTGGTTGGGCTAGACGT	2	Hsph1_+_149636203.23-P1P2|Hsph1_+_149636050.23-P1P2
Arhgap11a	P1P2	Arhgap11a_+_113848650.23-P1P2	GGATGTGTGCCGAGAAGGTG	1	Arhgap11a_-_113848701.23-P1P2	GCGCGACCGCACCTGAGCAG	2	Arhgap11a_+_113848650.23-P1P2|Arhgap11a_-_113848701.23-P1P2
Penk	P1P2	Penk_-_4138747.23-P1P2	GCGCGTCGGGGAGCTCTGCG	1	Penk_-_4138735.23-P1P2	GGTGTAAAGCGGCCGCGTCG	2	Penk_-_4138747.23-P1P2|Penk_-_4138735.23-P1P2
Senp6	P1P2	Senp6_+_80066978.23-P1P2	GAGAGCATCAGCCCAGGCCT	1	Senp6_-_80067214.23-P1P2	GagcggagggagcTCCTCAG	2	Senp6_+_80066978.23-P1P2|Senp6_-_80067214.23-P1P2
5430435G22Rik	P1P2	5430435G22Rik_-_131688716.23-P1P2	GAGTCTGTGCACAGAAAGAG	1	5430435G22Rik_-_131688738.23-P1P2	GAGGAAAACTCAGAGGGAAG	2	5430435G22Rik_-_131688716.23-P1P2|5430435G22Rik_-_131688738.23-P1P2
Rapgef1	P1P2	Rapgef1_-_29619813.23-P1P2	Ggcggctcgcggccccggag	1	Rapgef1_-_29619956.23-P1P2	GGAGCACCGGTCCAGTAGAG	2	Rapgef1_-_29619813.23-P1P2|Rapgef1_-_29619956.23-P1P2
Ccnf	P1P2	Ccnf_+_24251329.23-P1P2	GGCTTGAGAGCGGTCTAAAG	1	Ccnf_+_24251339.23-P1P2	GGCGCGGGCGCGCTTGAGAG	2	Ccnf_+_24251329.23-P1P2|Ccnf_+_24251339.23-P1P2
Ankrd60	P1P2	Ankrd60_+_173578194.23-P1P2	GGGCCCGCGCACAGGTTAGG	1	Ankrd60_+_173578197.23-P1P2	GCAGGGCCCGCGCACAGGTT	2	Ankrd60_+_173578194.23-P1P2|Ankrd60_+_173578197.23-P1P2
Desi1	P1P2	Desi1_-_82016152.23-P1P2	GACCGGCAACGACTACTGTG	1	Desi1_-_82016135.23-P1P2	GGCGCCCGGACACCCGCGAC	2	Desi1_-_82016152.23-P1P2|Desi1_-_82016135.23-P1P2
Anapc15	P1P2	Anapc15_+_101896435.23-P1P2	GCACTTACCGCGCCAAGAGC	1	Anapc15_+_101897176.23-P1P2	GTGGCCCAGCACTGTAGGAA	2	Anapc15_+_101896435.23-P1P2|Anapc15_+_101897176.23-P1P2
A1bg	P1P2	A1bg_+_60920999.23-P1P2	GGGCAGTGAACCTAAACTAT	1	A1bg_-_60921304.23-P1P2	GCTGTAGGGAGCATCTGCGG	2	A1bg_+_60920999.23-P1P2|A1bg_-_60921304.23-P1P2
Agpat6	P1P2	Agpat6_+_23208316.23-P1P2	GAGCGGCAGTCACCGAGGAC	1	Agpat6_+_23208301.23-P1P2	GGGACTGGAGCCGAGCCTCA	2	Agpat6_+_23208316.23-P1P2|Agpat6_+_23208301.23-P1P2
Per2	P1P2	Per2_+_91459255.23-P1P2	GGCGGCGCTACTGGGACTAG	1	Per2_+_91459279.23-P1P2	GACAGCGGAGGGCGACGCGG	2	Per2_+_91459255.23-P1P2|Per2_+_91459279.23-P1P2
4930550L24Rik	P1P2	4930550L24Rik_-_58911534.23-P1P2	GGTCTTCGTTCAGCTGAAGG	1	4930550L24Rik_+_58911501.23-P1P2	GGAACGAAGACGTCTGCACC	2	4930550L24Rik_-_58911534.23-P1P2|4930550L24Rik_+_58911501.23-P1P2
Sarnp	P1P2	Sarnp_+_128822110.23-P1P2	GAAGGTAGGCCTAAGAAAGG	1	Sarnp_-_128821897.23-P1P2	GGCCTAAGCGCCTGAGGTGG	2	Sarnp_+_128822110.23-P1P2|Sarnp_-_128821897.23-P1P2
Mettl7a3	P1P2	Mettl7a3_+_100334882.23-P1P2	GATGGCTGCGAGTGTCTCTT	1	Mettl7a3_+_100334981.23-P1P2	GAGAATGTTCAGCAGAAATA	2	Mettl7a3_+_100334882.23-P1P2|Mettl7a3_+_100334981.23-P1P2
Kif27	ENSMUST00000043605.5	Kif27_-_58354832.23-ENSMUST00000043605.5	GGCAGAGCAGAGGTCTGATT	1	Kif27_+_58354837.23-ENSMUST00000043605.5	GGAAGAAATACCAATAAAAG	2	Kif27_-_58354832.23-ENSMUST00000043605.5|Kif27_+_58354837.23-ENSMUST00000043605.5
Pygm	P2	Pygm_+_6397654.23-P2	GAACAGGTCAGGCTGCTTGG	1	Pygm_-_6397738.23-P2	GCTGCTGGCGAGGCTGCGTG	2	Pygm_+_6397654.23-P2|Pygm_-_6397738.23-P2
1110025L11Rik	ENSMUST00000089104.2	1110025L11Rik_-_89063701.23-ENSMUST00000089104.2	GAGCCAGTAAGAGTATCTCA	1	1110025L11Rik_-_89063645.23-ENSMUST00000089104.2	GTCTAAGGTTCAGAAAGAAT	2	1110025L11Rik_-_89063701.23-ENSMUST00000089104.2|1110025L11Rik_-_89063645.23-ENSMUST00000089104.2
Arrdc3	P1P2	Arrdc3_+_80883405.23-P1P2	GGTCTCCTTACAAAGACGGG	1	Arrdc3_-_80883422.23-P1P2	GCCAGCCGCCCGTCTTTGTA	2	Arrdc3_+_80883405.23-P1P2|Arrdc3_-_80883422.23-P1P2
Tns1	ENSMUST00000169786.1	Tns1_+_74124604.23-ENSMUST00000169786.1	GCCACTGCCTGGCAGAGCGG	1	Tns1_+_74124601.23-ENSMUST00000169786.1	GCTGCCTGGCAGAGCGGTGG	2	Tns1_+_74124604.23-ENSMUST00000169786.1|Tns1_+_74124601.23-ENSMUST00000169786.1
Capza3	P1P2	Capza3_+_140041540.23-P1P2	GTATGCTGGTCTATGAAGAA	1	Capza3_-_140041598.23-P1P2	GAATGAGTAACACCTTGAAT	2	Capza3_+_140041540.23-P1P2|Capza3_-_140041598.23-P1P2
Hsdl2	P1P2	Hsdl2_+_59581764.23-P1P2	GCGTCCTCTTACCCAGTGTT	1	Hsdl2_-_59581775.23-P1P2	GGGTCATGCTGCCCAACACT	2	Hsdl2_+_59581764.23-P1P2|Hsdl2_-_59581775.23-P1P2
Slfn4	P1P2	Slfn4_-_83175247.23-P1P2	GGCTGCGAGCATTCATACAG	1	Slfn4_+_83175265.23-P1P2	GGGGAGAGCAACTGATTCTG	2	Slfn4_-_83175247.23-P1P2|Slfn4_+_83175265.23-P1P2
Mslnl	P1P2	Mslnl_-_25735978.23-P1P2	GTGCTATGCCTGGGCCCAAG	1	Mslnl_-_25735998.23-P1P2	GGGTTGATACAAGCATTACC	2	Mslnl_-_25735978.23-P1P2|Mslnl_-_25735998.23-P1P2
Otx2	P2	Otx2_-_48665044.23-P2	GCCTCCAGGAGCAAGCGACT	1	Otx2_+_48665104.23-P2	GTGCAGGCCGGCGCAGGCAG	2	Otx2_-_48665044.23-P2|Otx2_+_48665104.23-P2
Atp5k	P1P2	Atp5k_-_108434397.23-P1P2	GCGCGCCGGAAGCTCAACTG	1	Atp5k_+_108434324.23-P1P2	GCAGGTCTCTCCACTCATCA	2	Atp5k_-_108434397.23-P1P2|Atp5k_+_108434324.23-P1P2
Ncor1	P1	Ncor1_+_62457274.23-P1	GTAAGGTGGCGAAGCTGCGG	1	Ncor1_+_62457271.23-P1	GGGTGGCGAAGCTGCGGCGG	2	Ncor1_+_62457274.23-P1|Ncor1_+_62457271.23-P1
Cldn11	P1P2	Cldn11_+_31150017.23-P1P2	GCTCCGGGCTACTCGAGATG	1	Cldn11_+_31149956.23-P1P2	GGGGACAGGTGCGCCTGGAG	2	Cldn11_+_31150017.23-P1P2|Cldn11_+_31149956.23-P1P2
Acad11	P1P2	Acad11_-_104063754.23-P1P2	GGATTCCTCGGTGACAACAG	1	Acad11_-_104063757.23-P1P2	GTCCTCGGTGACAACAGTGG	2	Acad11_-_104063754.23-P1P2|Acad11_-_104063757.23-P1P2
Olfr1222	ENSMUST00000099794.1	Olfr1222_-_89125745.23-ENSMUST00000099794.1	GTGCATGGTTCTCAAGAAGA	1	Olfr1222_-_89125528.23-ENSMUST00000099794.1	GAGAGGAAGTGCAAGCATCC	2	Olfr1222_-_89125745.23-ENSMUST00000099794.1|Olfr1222_-_89125528.23-ENSMUST00000099794.1
Afm	P1P2	Afm_+_90519033.23-P1P2	GGGGCTAGGGATTCAGTCAA	1	Afm_+_90519053.23-P1P2	GGTCCTGAGGCTTTGTGGGT	2	Afm_+_90519033.23-P1P2|Afm_+_90519053.23-P1P2
Ceacam20	P1P2	Ceacam20_-_19965460.23-P1P2	GAGCCAGGAGAGGGACTACC	1	Ceacam20_+_19965441.23-P1P2	GTGCCAGGTAGTCCCTCTCC	2	Ceacam20_-_19965460.23-P1P2|Ceacam20_+_19965441.23-P1P2
Dmd	P1P2	Dmd_+_82948914.23-P1P2	GAAGAGCTGAGTCCTGTAAG	1	Dmd_-_82948940.23-P1P2	GTACAGGACTCAGCTCTTGA	2	Dmd_+_82948914.23-P1P2|Dmd_-_82948940.23-P1P2
Ap2b1	P1P2	Ap2b1_+_83302868.23-P1P2	GAAGCACCGCGAGTCAGTCA	1	Ap2b1_+_83302831.23-P1P2	GGCCGCCTTGAACTCACcgg	2	Ap2b1_+_83302868.23-P1P2|Ap2b1_+_83302831.23-P1P2
Vps13b	P1P2	Vps13b_-_35371549.23-P1P2	GGCGGACGCCAGGTACCCGG	1	Vps13b_+_35371561.23-P1P2	GTAAACACGCCACAGAGCGG	2	Vps13b_-_35371549.23-P1P2|Vps13b_+_35371561.23-P1P2
Armc9	P1P2	Armc9_+_86154832.23-P1P2	GGCCGCGCTTACCTGCTGCA	1	Armc9_+_86154784.23-P1P2	GAGCTCGCCGGCCGTCACCC	2	Armc9_+_86154832.23-P1P2|Armc9_+_86154784.23-P1P2
Arhgef4	P1	Arhgef4_+_34801772.23-P1	GTCACGCCCGGCCAACCTCC	1	Arhgef4_-_34801779.23-P1	GCCCGGCGATAGGAGCCCGG	2	Arhgef4_+_34801772.23-P1|Arhgef4_-_34801779.23-P1
Pate4	P1P2	Pate4_-_35611850.23-P1P2	GTTCGTCACTGAATTCATGT	1	Pate4_-_35611877.23-P1P2	GAGAAGGCAGCTTGAGGTAA	2	Pate4_-_35611850.23-P1P2|Pate4_-_35611877.23-P1P2
Atp6v0c	P1P2	Atp6v0c_+_24169395.23-P1P2	GGAGCGCAGCGCCTGACTGG	1	Atp6v0c_-_24169406.23-P1P2	GGAAGGCGACCCCGCCAGTC	2	Atp6v0c_+_24169395.23-P1P2|Atp6v0c_-_24169406.23-P1P2
Arhgef5	P1P2	Arhgef5_-_43265702.23-P1P2	GcgggcgcccggACCTGGAG	1	Arhgef5_+_43265693.23-P1P2	GTGGCCCGAGAGTCCCCTCC	2	Arhgef5_-_43265702.23-P1P2|Arhgef5_+_43265693.23-P1P2
Bzrap1	P1	Bzrap1_+_87760605.23-P1	GTCAGCTCGAGGGACTGCAA	1	Bzrap1_+_87760566.23-P1	GGCTCCCCAAATGAGATGGT	2	Bzrap1_+_87760605.23-P1|Bzrap1_+_87760566.23-P1
Kmt2d	P1P2	Kmt2d_-_98871142.23-P1P2	GGGCTTAGGGAGACCAAGAA	1	Kmt2d_-_98871122.23-P1P2	GAGCCGCCCCCCACTCGGGG	2	Kmt2d_-_98871142.23-P1P2|Kmt2d_-_98871122.23-P1P2
Srsf7	P1P2	Srsf7_-_80207265.23-P1P2	GAGCGCGAGTAGCACGGAAG	1	Srsf7_-_80207308.23-P1P2	GCAATCCCGGCGGCACTACA	2	Srsf7_-_80207265.23-P1P2|Srsf7_-_80207308.23-P1P2
Cd3e	P1P2	Cd3e_-_45009601.23-P1P2	GCACCAGACGCAGACAGGGG	1	Cd3e_-_45009598.23-P1P2	GAGGCACCAGACGCAGACAG	2	Cd3e_-_45009601.23-P1P2|Cd3e_-_45009598.23-P1P2
Fmo3	P1P2	Fmo3_+_162984484.23-P1P2	GGTTTAAACACAGAGAAGAA	1	Fmo3_+_162984507.23-P1P2	GTCAGAGTCCCCAGAAGACT	2	Fmo3_+_162984484.23-P1P2|Fmo3_+_162984507.23-P1P2
Zbtb44	P1P2	Zbtb44_-_31030441.23-P1P2	GCAGGCTGGAGTGAAACGAG	1	Zbtb44_-_31030447.23-P1P2	GGGAGTGAAACGAGCGGCTA	2	Zbtb44_-_31030441.23-P1P2|Zbtb44_-_31030447.23-P1P2
Cftr	P1P2	Cftr_-_18170624.23-P1P2	GGCGCTGGCTTTAACCTGGG	1	Cftr_-_18170678.23-P1P2	GAGGTGTGTGGGACCCGAGT	2	Cftr_-_18170624.23-P1P2|Cftr_-_18170678.23-P1P2
Cts7	P1P2	Cts7_+_61358124.23-P1P2	GTAGCAGCAATCATCAGAGG	1	Cts7_-_61358183.23-P1P2	GAGTCTCTTCAGAGGTTGTT	2	Cts7_+_61358124.23-P1P2|Cts7_-_61358183.23-P1P2
Trp53rk	P1	Trp53rk_-_166793833.23-P1	GATGGCTGGTGTGTCCTCGG	1	Trp53rk_-_166793836.23-P1	GGCTGGTGTGTCCTCGGAGG	2	Trp53rk_-_166793833.23-P1|Trp53rk_-_166793836.23-P1
Wdr86	P1P2	Wdr86_+_24730620.23-P1P2	GTACCGGCTTCAGACCTGGT	1	Wdr86_-_24730596.23-P1P2	GACCTTCTCGGGGCTCAGGA	2	Wdr86_+_24730620.23-P1P2|Wdr86_-_24730596.23-P1P2
Akirin1	P1P2	Akirin1_-_123750271.23-P1P2	GCCGGCTCCAATGGCGCCTC	1	Akirin1_+_123750296.23-P1P2	GACGCCCGTGACGTCACAGG	2	Akirin1_-_123750271.23-P1P2|Akirin1_+_123750296.23-P1P2
Tnk2	P1P2	Tnk2_-_32643953.23-P1P2	GGGTggccgaggtcgagtgt	1	Tnk2_-_32643956.23-P1P2	Gggccgaggtcgagtgtggg	2	Tnk2_-_32643953.23-P1P2|Tnk2_-_32643956.23-P1P2
Olfr46	ENSMUST00000072655.2	Olfr46_+_140610376.23-ENSMUST00000072655.2	GCATGGTCGCTAAGTTGCAC	1	Olfr46_-_140610630.23-ENSMUST00000072655.2	GTCTGTGGGACCTTTGCCGT	2	Olfr46_+_140610376.23-ENSMUST00000072655.2|Olfr46_-_140610630.23-ENSMUST00000072655.2
Plxna3	P1P2	Plxna3_-_74329131.23-P1P2	GAGGCTGCGGGGCCAAGCGA	1	Plxna3_-_74329219.23-P1P2	GTCGCGGTGGAGGGACAGGT	2	Plxna3_-_74329131.23-P1P2|Plxna3_-_74329219.23-P1P2
Ssr1	P1P2	Ssr1_-_37994120.23-P1P2	GGTCCGGTGCGGGTCCGCTA	1	Ssr1_+_37994112.23-P1P2	GGAGCCTCCGAGAGCCCTAG	2	Ssr1_-_37994120.23-P1P2|Ssr1_+_37994112.23-P1P2
4933402J07Rik	P1P2	4933402J07Rik_+_87563901.23-P1P2	GCCTCTGGATGTAGTGACAA	1	4933402J07Rik_+_87563964.23-P1P2	GAGTCTGTCACTCTTCTCTC	2	4933402J07Rik_+_87563901.23-P1P2|4933402J07Rik_+_87563964.23-P1P2
Ckap4	P1P2	Ckap4_+_84533931.23-P1P2	GCCGCCCGCGCAGTCCCCGT	1	Ckap4_-_84533992.23-P1P2	GTCGGAGCGGCCGGGAACGT	2	Ckap4_+_84533931.23-P1P2|Ckap4_-_84533992.23-P1P2
Spata31d1b	ENSMUST00000165133.1	Spata31d1b_+_59712556.23-ENSMUST00000165133.1	GAAGCTCACCCCACAGCCAG	1	Spata31d1b_-_59712783.23-ENSMUST00000165133.1	Ggaggagaggagagcgatgg	2	Spata31d1b_+_59712556.23-ENSMUST00000165133.1|Spata31d1b_-_59712783.23-ENSMUST00000165133.1
Rnf25	P1P2	Rnf25_-_74601292.23-P1P2	GAGTTCCCGGCACCAGATCC	1	Rnf25_+_74601163.23-P1P2	GCTACTGGACCGGGAACGGA	2	Rnf25_-_74601292.23-P1P2|Rnf25_+_74601163.23-P1P2
Vps9d1	P1P2	Vps9d1_+_123254000.23-P1P2	GAGGCCATCGAGCTAGACAC	1	Vps9d1_+_123254060.23-P1P2	Gccgctgcggccggggacgg	2	Vps9d1_+_123254000.23-P1P2|Vps9d1_+_123254060.23-P1P2
Ifrd1	P1	Ifrd1_-_40223105.23-P1	GGAGCGGCGCGGGTGAGAAG	1	Ifrd1_-_40223079.23-P1	GAGTCTCGGGCTAACAAGAG	2	Ifrd1_-_40223105.23-P1|Ifrd1_-_40223079.23-P1
Wnt3	P1P2	Wnt3_+_103774199.23-P1P2	GGAGCGACGCCCCCAATAGT	1	Wnt3_+_103774221.23-P1P2	GTGCCGGCGATCATGAAGAG	2	Wnt3_+_103774199.23-P1P2|Wnt3_+_103774221.23-P1P2
Prdx6b	P1P2	Prdx6b_+_80292545.23-P1P2	GTCACTGTCGAGTCTGATCG	1	Prdx6b_-_80292524.23-P1P2	GGGTAAACACTGAGTTGAAT	2	Prdx6b_+_80292545.23-P1P2|Prdx6b_-_80292524.23-P1P2
Derl1	P1P2	Derl1_-_57892419.23-P1P2	GTGCAGGAGGCGGAGACCGA	1	Derl1_-_57892108.23-P1P2	GTAGCCGCGGGGACACCTGG	2	Derl1_-_57892419.23-P1P2|Derl1_-_57892108.23-P1P2
Sec62	P1P2	Sec62_-_30793376.23-P1P2	GACGCAGGCGACACAAGAAG	1	Sec62_-_30793350.23-P1P2	GCCGGGCGGAGCGGCCAACA	2	Sec62_-_30793376.23-P1P2|Sec62_-_30793350.23-P1P2
Tll2	P1P2	Tll2_-_41206813.23-P1P2	GTCGTCCGGCCTGGACACCC	1	Tll2_-_41206765.23-P1P2	GTGGCTGCCAGGCACCGGTA	2	Tll2_-_41206813.23-P1P2|Tll2_-_41206765.23-P1P2
Tnnt3	P1P2	Tnnt3_-_142498934.23-P1P2	GGAACAGCCCGCGTAGGAGT	1	Tnnt3_-_142498928.23-P1P2	GGGATGTGAACAGCCCGCGT	2	Tnnt3_-_142498934.23-P1P2|Tnnt3_-_142498928.23-P1P2
Cox8a	P1P2	Cox8a_-_7217538.23-P1P2	GCGCGGAACGACCACGGACG	1	Cox8a_-_7217556.23-P1P2	GGAGGACCAGTCCAAGGTCA	2	Cox8a_-_7217538.23-P1P2|Cox8a_-_7217556.23-P1P2
Trappc4	P1P2	Trappc4_+_44407297.23-P1P2	GCCTATCCGTAGCACAGTGA	1	Trappc4_+_44407260.23-P1P2	GACGTGGTGAACAAAGCCGG	2	Trappc4_+_44407297.23-P1P2|Trappc4_+_44407260.23-P1P2
Podnl1	P1	Podnl1_-_84127611.23-P1	GCACCCAGGCCTGCCTGATG	1	Podnl1_+_84127602.23-P1	GGGGACTCAAAGGCCTCATC	2	Podnl1_-_84127611.23-P1|Podnl1_+_84127602.23-P1
Agtr1b	P1P2	Agtr1b_-_20367132.23-P1P2	GAGGCTGTGCGTGTCTTGTC	1	Agtr1b_+_20367082.23-P1P2	GGCCAGCAGCACTGTAGATG	2	Agtr1b_-_20367132.23-P1P2|Agtr1b_+_20367082.23-P1P2
Glb1l	P2	Glb1l_+_75210749.23-P2	GGTGGGGACCCGGAAGTGAG	1	Glb1l_+_75210727.23-P2	GCTGGGGCCCGGCTAGACCT	2	Glb1l_+_75210749.23-P2|Glb1l_+_75210727.23-P2
Olfr1390	ENSMUST00000062719.1	Olfr1390_+_49340592.23-ENSMUST00000062719.1	GGAGAAGGAGTTCCAGTTGA	1	Olfr1390_+_49340855.23-ENSMUST00000062719.1	GAGGAGCACACTCTCTGTGG	2	Olfr1390_+_49340592.23-ENSMUST00000062719.1|Olfr1390_+_49340855.23-ENSMUST00000062719.1
Catsperg1	P1P2	Catsperg1_+_29211509.23-P1P2	GAGTCCCCTGAGGGGCACAG	1	Catsperg1_+_29211440.23-P1P2	GACTTGGCGAAGAGTAGGTT	2	Catsperg1_+_29211509.23-P1P2|Catsperg1_+_29211440.23-P1P2
Sowahb	P1P2	Sowahb_-_93045028.23-P1P2	GTCCCCAGGGCGCTCCAGGA	1	Sowahb_-_93045015.23-P1P2	GGGCGCCGCCCGCATCCCCA	2	Sowahb_-_93045028.23-P1P2|Sowahb_-_93045015.23-P1P2
Ly75	P1P2	Ly75_+_60383244.23-P1P2	GAAGCCGGTGCGGGCAGGAG	1	Ly75_+_60383220.23-P1P2	GTGGGACTGGAGATGCGGAC	2	Ly75_+_60383244.23-P1P2|Ly75_+_60383220.23-P1P2
Csn1s2a	P1P2	Csn1s2a_+_87774583.23-P1P2	GTCCCCAAATGGAAGACGAG	1	Csn1s2a_+_87774577.23-P1P2	GAATGGAAGACGAGAGGAAT	2	Csn1s2a_+_87774583.23-P1P2|Csn1s2a_+_87774577.23-P1P2
Prune	P1P2	Prune_-_95281721.23-P1P2	GGTCTAGAGCCGAGAGTCAG	1	Prune_-_95281725.23-P1P2	GAGAGCCGAGAGTCAGGGGG	2	Prune_-_95281721.23-P1P2|Prune_-_95281725.23-P1P2
Nmrk2	P1P2	Nmrk2_+_81201999.23-P1P2	GgtgcagcAGGGGCCACCTC	1	Nmrk2_+_81201821.23-P1P2	GGAGCTTGGTGACCACTGAG	2	Nmrk2_+_81201999.23-P1P2|Nmrk2_+_81201821.23-P1P2
Mrpl3	P1P2	Mrpl3_-_105053340.23-P1P2	GGGCCTACTACGAACTCCTG	1	Mrpl3_+_105053321.23-P1P2	GAACCCCAGGAGTTCGTAGT	2	Mrpl3_-_105053340.23-P1P2|Mrpl3_+_105053321.23-P1P2
Aknad1	P1P2	Aknad1_-_108744435.23-P1P2	GGACTGAGCTGGGTAGTATC	1	Aknad1_+_108744444.23-P1P2	GACAGGTGGTGGGAAAGGAC	2	Aknad1_-_108744435.23-P1P2|Aknad1_+_108744444.23-P1P2
Car6	P2	Car6_+_150198137.23-P2	GAGCTTGGTGAACTATGAGA	1	Car6_-_150198176.23-P2	GAGCTCAGGGGCTTCAAGGA	2	Car6_+_150198137.23-P2|Car6_-_150198176.23-P2
Trnp1	P1P2	Trnp1_-_133498529.23-P1P2	GTGGGCACGAGACTAGTGAG	1	Trnp1_-_133498496.23-P1P2	GCCAGGGTTGTCGGTGCGTG	2	Trnp1_-_133498529.23-P1P2|Trnp1_-_133498496.23-P1P2
Rab37	P1P2	Rab37_-_115154205.23-P1P2	GGACTGTCCGGGGACATGAC	1	Rab37_+_115154179.23-P1P2	GCATGTCCCCGGACAGTCAG	2	Rab37_-_115154205.23-P1P2|Rab37_+_115154179.23-P1P2
Kif18a	P1P2	Kif18a_+_109280866.23-P1P2	GAGAAGTGACCGTCACAACT	1	Kif18a_-_109280893.23-P1P2	GTGTGACGGTCACTTCTTGT	2	Kif18a_+_109280866.23-P1P2|Kif18a_-_109280893.23-P1P2
Zfp184	P1P2	Zfp184_+_21945353.23-P1P2	GCTGGCCCGGCCCAGAACAA	1	Zfp184_+_21945168.23-P1P2	GAGTCTTGTGACGCACTCCA	2	Zfp184_+_21945353.23-P1P2|Zfp184_+_21945168.23-P1P2
Coq2	P1P2	Coq2_+_100674224.23-P1P2	GGCGCCATGCTGCGCTGGGG	1	Coq2_-_100674279.23-P1P2	GCGGTCGGTGGCGTCATCCA	2	Coq2_+_100674224.23-P1P2|Coq2_-_100674279.23-P1P2
Gm11744	P1	Gm11744_+_116657164.23-P1	GCAGGGCCGGGGAGCCACAA	1	Gm11744_-_116657201.23-P1	GGCCCTGTGGCCTTCTTCAG	2	Gm11744_+_116657164.23-P1|Gm11744_-_116657201.23-P1
Tox3	P1P2	Tox3_-_90348301.23-P1P2	GGTGCGCGGCGAAGCTGGGA	1	Tox3_+_90348337.23-P1P2	GCGGCTCAGTCCGCCCGGGG	2	Tox3_-_90348301.23-P1P2|Tox3_+_90348337.23-P1P2
Usp43	P1P2	Usp43_-_67922133.23-P1P2	GGGTCCTCACCGCCTCCCGG	1	Usp43_-_67921988.23-P1P2	GCAGGCGGCGAAGGGAAcgg	2	Usp43_-_67922133.23-P1P2|Usp43_-_67921988.23-P1P2
Exosc8	P1P2	Exosc8_+_54735017.23-P1P2	GGAGCGGGCCGGAAAAATGG	1	Exosc8_+_54734996.23-P1P2	GGCTGGGTTCAAGTGAGTGG	2	Exosc8_+_54735017.23-P1P2|Exosc8_+_54734996.23-P1P2
St8sia4	P1P2	St8sia4_-_95667510.23-P1P2	GGCTCTGCGCCGCCTCCCTG	1	St8sia4_-_95667418.23-P1P2	GAGGTCGCTAGGATGTTCAG	2	St8sia4_-_95667510.23-P1P2|St8sia4_-_95667418.23-P1P2
Pex10	P1P2	Pex10_+_155067084.23-P1P2	GGCTGCCCGGATCACTTCAG	1	Pex10_-_155067101.23-P1P2	GGGTGCCCCTGAAGTGATCC	2	Pex10_+_155067084.23-P1P2|Pex10_-_155067101.23-P1P2
Fermt1	P1P2	Fermt1_+_132945496.23-P1P2	GCGGGACTCGGACCGTGCTT	1	Fermt1_-_132945432.23-P1P2	GGGACCGCACCAAGGTACAG	2	Fermt1_+_132945496.23-P1P2|Fermt1_-_132945432.23-P1P2
Crisp2	P1P2	Crisp2_+_40793983.23-P1P2	GAGAGTGGATGTGACCAGGG	1	Crisp2_+_40794087.23-P1P2	GCGTTGCTCACCGAGGGGAG	2	Crisp2_+_40793983.23-P1P2|Crisp2_+_40794087.23-P1P2
Chst11	P1P2	Chst11_+_82985412.23-P1P2	GCAGTGATCTATATATTCCA	1	Chst11_-_82985466.23-P1P2	GAGTAGCTTTTGGCGAGGGA	2	Chst11_+_82985412.23-P1P2|Chst11_-_82985466.23-P1P2
Csrnp2	P1P2	Csrnp2_-_100494998.23-P1P2	GCTGCTGCCAGGCAAGGACG	1	Csrnp2_+_100494823.23-P1P2	GGCTAGCTCGAGGGATGGAT	2	Csrnp2_-_100494998.23-P1P2|Csrnp2_+_100494823.23-P1P2
Gstz1	P1P2	Gstz1_+_87147748.23-P1P2	GAGCGGGGTCCAGAGAGCGA	1	Gstz1_-_87148111.23-P1P2	GGGTAGACAGACCTCTTCTA	2	Gstz1_+_87147748.23-P1P2|Gstz1_-_87148111.23-P1P2
Stk32c	P1	Stk32c_+_139188462.23-P1	GGCGAGCCAGAGCAGATACC	1	Stk32c_-_139188488.23-P1	GTATCTGCTCTGGCTCGCCA	2	Stk32c_+_139188462.23-P1|Stk32c_-_139188488.23-P1
Bpifa2	P1P2	Bpifa2_+_154008339.23-P1P2	GCTCCTGTGGACTCTCAGAT	1	Bpifa2_+_154008244.23-P1P2	GACGATCTCCTGGGATTCTA	2	Bpifa2_+_154008339.23-P1P2|Bpifa2_+_154008244.23-P1P2
Arpc5l	P1P2	Arpc5l_-_39008143.23-P1P2	GAAGCGGAGCCGGTGCGGAG	1	Arpc5l_-_39008170.23-P1P2	GGGAAAGAGCGAAGCCTAGG	2	Arpc5l_-_39008143.23-P1P2|Arpc5l_-_39008170.23-P1P2
Lsamp	P1P2	Lsamp_+_41533075.23-P1P2	GAGGCGACTGTCAATGGCAG	1	Lsamp_+_41533081.23-P1P2	GATGAGGAGGCGACTGTCAA	2	Lsamp_+_41533075.23-P1P2|Lsamp_+_41533081.23-P1P2
E2f2	P1P2	E2f2_-_136172759.23-P1P2	GGCGCGCGCCAGACCCGAGT	1	E2f2_-_136172765.23-P1P2	GGCCAGACCCGAGTGGGTAG	2	E2f2_-_136172759.23-P1P2|E2f2_-_136172765.23-P1P2
Vmn1r194	ENSMUST00000091737.1	Vmn1r194_+_22244516.23-ENSMUST00000091737.1	GGACAGCCTGGACTGTACTG	1	Vmn1r194_-_22244677.23-ENSMUST00000091737.1	GACTATATAACAGCAGGCAG	2	Vmn1r194_+_22244516.23-ENSMUST00000091737.1|Vmn1r194_-_22244677.23-ENSMUST00000091737.1
Man1a	P1P2	Man1a_+_54075702.23-P1P2	GGCCGCGACGGAGGGCAGTA	1	Man1a_-_54075699.23-P1P2	GCGGCGTGAGCCAGCGAACC	2	Man1a_+_54075702.23-P1P2|Man1a_-_54075699.23-P1P2
Glycam1	P1P2	Glycam1_-_103565032.23-P1P2	GAGGACAGTGAAGAATTTCA	1	Glycam1_-_103565063.23-P1P2	GAACAAGGTCAGCTTTCCCT	2	Glycam1_-_103565032.23-P1P2|Glycam1_-_103565063.23-P1P2
Ccnyl1	P1P2	Ccnyl1_-_64691408.23-P1P2	GGAGATGCCCGAAGGTGAGG	1	Ccnyl1_-_64690940.23-P1P2	GCGCAGACTAGTCCGCTGTg	2	Ccnyl1_-_64691408.23-P1P2|Ccnyl1_-_64690940.23-P1P2
A630001G21Rik	P1P2	A630001G21Rik_-_85736496.23-P1P2	GGGTCTGGGGGAGTCCGCAG	1	A630001G21Rik_-_85736584.23-P1P2	GAAGCTAGGACCTCGATCTG	2	A630001G21Rik_-_85736496.23-P1P2|A630001G21Rik_-_85736584.23-P1P2
Prss38	P1P2	Prss38_-_59375659.23-P1P2	GAGTCGCAGCCCAGCAGGAG	1	Prss38_-_59375621.23-P1P2	GGACGCCCAAGCCGGAAGTG	2	Prss38_-_59375659.23-P1P2|Prss38_-_59375621.23-P1P2
4933430I17Rik	P1P2	4933430I17Rik_+_62525139.23-P1P2	GCGGGGCTGATGTAGCAGAG	1	4933430I17Rik_-_62525400.23-P1P2	GTGCCTAGCTTGGAAAGGGT	2	4933430I17Rik_+_62525139.23-P1P2|4933430I17Rik_-_62525400.23-P1P2
1700025G04Rik	P1P2	1700025G04Rik_-_152090249.23-P1P2	GGGAACGGCCCCCCGGGAGT	1	1700025G04Rik_+_152090038.23-P1P2	GGAGCCCCGGCCACACTGTA	2	1700025G04Rik_-_152090249.23-P1P2|1700025G04Rik_+_152090038.23-P1P2
Toe1	P1P2	Toe1_-_116807491.23-P1P2	GCAGAGGGCGTTGGAACTGG	1	Toe1_+_116807515.23-P1P2	GAGGCTGGCGAGGGGCGTCA	2	Toe1_-_116807491.23-P1P2|Toe1_+_116807515.23-P1P2
Rara	P2	Rara_-_98960522.23-P2	GcggaggcggggccgTACAG	1	Rara_+_98960525.23-P2	GAGATTCCGGGTGCGGGTGG	2	Rara_-_98960522.23-P2|Rara_+_98960525.23-P2
Pfkm	P1	Pfkm_-_98108611.23-P1	GGAGGAGAGCTAAAACTACA	1	Pfkm_-_98108593.23-P1	GTGCAAGAAAGCAGCGGCGG	2	Pfkm_-_98108611.23-P1|Pfkm_-_98108593.23-P1
Tcea1	P1P2	Tcea1_-_4857776.23-P1P2	GACTGGCACGGCCTAGGGGG	1	Tcea1_-_4858044.23-P1P2	GGCCCACGCGGAGTCAGTCA	2	Tcea1_-_4857776.23-P1P2|Tcea1_-_4858044.23-P1P2
Rspo1	P1P2	Rspo1_-_124986505.23-P1P2	Ggagcccgggcggcgcactg	1	Rspo1_-_124986623.23-P1P2	GACGGCAACGCGGGACCCAG	2	Rspo1_-_124986505.23-P1P2|Rspo1_-_124986623.23-P1P2
Hps5	P1P2	Hps5_+_46795624.23-P1P2	GCGATCGCTGGTCTCTGGGG	1	Hps5_-_46795611.23-P1P2	GAGAACCTCAGGCTGACTAG	2	Hps5_+_46795624.23-P1P2|Hps5_-_46795611.23-P1P2
Rhox3c	ENSMUST00000115188.2	Rhox3c_-_37458978.23-ENSMUST00000115188.2	GTGTCTTCTGAGACCTTTAA	1	Rhox3c_+_37458723.23-ENSMUST00000115188.2	GTGTGTCCTGTGAAGCCTGT	2	Rhox3c_-_37458978.23-ENSMUST00000115188.2|Rhox3c_+_37458723.23-ENSMUST00000115188.2
Cacna1h	P1P2	Cacna1h_-_25433731.23-P1P2	GggcgcggccgAGCCAGAGA	1	Cacna1h_+_25433742.23-P1P2	GTGTGCGCGGACGGGCTCCA	2	Cacna1h_-_25433731.23-P1P2|Cacna1h_+_25433742.23-P1P2
Prpf4b	P1P2	Prpf4b_+_34875582.23-P1P2	GTGGACGCCAGTGGAAGCGG	1	Prpf4b_+_34875585.23-P1P2	GCCGTGGACGCCAGTGGAAG	2	Prpf4b_+_34875582.23-P1P2|Prpf4b_+_34875585.23-P1P2
Srsf11	P2	Srsf11_-_158031716.23-P2	GGCCGCCGGCCGCACACAAA	1	Srsf11_+_158031743.23-P2	GGGCGGGCGTGTGGAATTGT	2	Srsf11_-_158031716.23-P2|Srsf11_+_158031743.23-P2
Krtap13-1	P1P2	Krtap13-1_+_88728881.23-P1P2	GCAGCCGTAGGACATGTTGA	1	Krtap13-1_-_88728899.23-P1P2	GCTGCCATCAACATGTCCTA	2	Krtap13-1_+_88728881.23-P1P2|Krtap13-1_-_88728899.23-P1P2
S100a16	P1	S100a16_-_90537410.23-P1	GCTGGAGGAGGTGGACTCAC	1	S100a16_-_90537437.23-P1	GGGTGAGCCCCCAGGCCCAG	2	S100a16_-_90537410.23-P1|S100a16_-_90537437.23-P1
Atic	P1P2	Atic_+_71557225.23-P1P2	GGGGTCGCGGAGTCAAGGGA	1	Atic_+_71557229.23-P1P2	GCGTTGGGTCGCGGAGTCAA	2	Atic_+_71557225.23-P1P2|Atic_+_71557229.23-P1P2
Casc5	P1P2	Casc5_-_119047193.23-P1P2	GGAGGTGACGTCCGACTCCA	1	Casc5_-_119047175.23-P1P2	GATACTTCAGGGACGTTGAG	2	Casc5_-_119047193.23-P1P2|Casc5_-_119047175.23-P1P2
Tnf	P1P2	Tnf_+_35201975.23-P1P2	GCCCTCAGCGAGGACAGCAA	1	Tnf_-_35201750.23-P1P2	GTGAGAAGAGGCTGAGACAT	2	Tnf_+_35201975.23-P1P2|Tnf_-_35201750.23-P1P2
Zfp687	P1P2	Zfp687_+_95015410.23-P1P2	GGAGAAGCAGGAAGTAgcgg	1	Zfp687_+_95015433.23-P1P2	GGGGAGAGGGGAGGCCGAAG	2	Zfp687_+_95015410.23-P1P2|Zfp687_+_95015433.23-P1P2
BC049352	P2	BC049352_-_45182016.23-P2	GATGGCTGCAGGGGAAGTAG	1	BC049352_-_45182031.23-P2	GGTAGAGGACAGCAGGTACT	2	BC049352_-_45182016.23-P2|BC049352_-_45182031.23-P2
Plac8l1	P1P2	Plac8l1_+_42196660.23-P1P2	GTGGTCTCCTTATTGTCCAA	1	Plac8l1_-_42196675.23-P1P2	GTCCTTTCCCTTGGACAATA	2	Plac8l1_+_42196660.23-P1P2|Plac8l1_-_42196675.23-P1P2
Cd83	P1P2	Cd83_+_43785211.23-P1P2	GAGCTGGAGGCCTTGCGACA	1	Cd83_+_43785224.23-P1P2	GGCCTAGAAACAGGAGCTGG	2	Cd83_+_43785211.23-P1P2|Cd83_+_43785224.23-P1P2
Cbfa2t2	P1P2	Cbfa2t2_-_154436475.23-P1P2	GgcggcgcgcggccTAAcgg	1	Cbfa2t2_-_154436478.23-P1P2	GgcgcgcggccTAAcggcgg	2	Cbfa2t2_-_154436475.23-P1P2|Cbfa2t2_-_154436478.23-P1P2
Sostdc1	P1P2	Sostdc1_-_36314249.23-P1P2	GCCACAGTGCAGAAGCAAGG	1	Sostdc1_+_36314284.23-P1P2	GCAGGAGGAAGCATGATGAG	2	Sostdc1_-_36314249.23-P1P2|Sostdc1_+_36314284.23-P1P2
Coa5	P1P2	Coa5_+_37429988.23-P1P2	GCGAGGGCCGTGATCCAGTG	1	Coa5_-_37430033.23-P1P2	GCACCCCGCACGGCCCGGAA	2	Coa5_+_37429988.23-P1P2|Coa5_-_37430033.23-P1P2
Cxcl15	P1P2	Cxcl15_-_90794573.23-P1P2	GGTCAGGCCACAGACGGACA	1	Cxcl15_-_90794567.23-P1P2	GACCAGAGTCAGGCCACAGA	2	Cxcl15_-_90794573.23-P1P2|Cxcl15_-_90794567.23-P1P2
Tdpoz2	ENSMUST00000178358.1	Tdpoz2_-_93652483.23-ENSMUST00000178358.1	GTTCTTCATCAAACCCGTTT	1	Tdpoz2_-_93652357.23-ENSMUST00000178358.1	GATTCAAGCTCTGCGTATAT	2	Tdpoz2_-_93652483.23-ENSMUST00000178358.1|Tdpoz2_-_93652357.23-ENSMUST00000178358.1
Tmie	P1P2	Tmie_-_110880042.23-P1P2	GAGCTCGCGGACCGACCGAA	1	Tmie_-_110880019.23-P1P2	GACAGCCAGGGTGCGATCCT	2	Tmie_-_110880042.23-P1P2|Tmie_-_110880019.23-P1P2
Spink8	P1P2	Spink8_+_109816741.23-P1P2	GATGGTGACAGACCTGTGGA	1	Spink8_-_109816689.23-P1P2	GAGCTGAGGCTCCTTCAGTC	2	Spink8_+_109816741.23-P1P2|Spink8_-_109816689.23-P1P2
Arhgef18	P1P2	Arhgef18_-_3393073.23-P1P2	GGACCCGGGAGCCAGCAGGG	1	Arhgef18_-_3393059.23-P1P2	GGAGACTGCGAGAGCGACCC	2	Arhgef18_-_3393073.23-P1P2|Arhgef18_-_3393059.23-P1P2
Oxld1	P1P2	Oxld1_+_120458013.23-P1P2	GGGCAGCCGCACCAGCTATG	1	Oxld1_-_120458024.23-P1P2	GGCAGCGGCGACCCCATAGC	2	Oxld1_+_120458013.23-P1P2|Oxld1_-_120458024.23-P1P2
Zfp568	P1P2	Zfp568_+_29983971.23-P1P2	GGCCAGCCCCTCCACTCGGG	1	Zfp568_+_29983974.23-P1P2	GACGGCCAGCCCCTCCACTC	2	Zfp568_+_29983971.23-P1P2|Zfp568_+_29983974.23-P1P2
Nacc1	P1P2	Nacc1_+_84687831.23-P1P2	GCGGCCTGGCCCACAATGAA	1	Nacc1_-_84687844.23-P1P2	GCGCGGCGGCCATTCATTGT	2	Nacc1_+_84687831.23-P1P2|Nacc1_-_84687844.23-P1P2
AI987944	P1P2	AI987944_+_41393317.23-P1P2	GGGCAGTTTCAGCTCTATAA	1	AI987944_-_41393355.23-P1P2	GCTGCCGCAAGGAACCCGGA	2	AI987944_+_41393317.23-P1P2|AI987944_-_41393355.23-P1P2
As3mt	P1P2	As3mt_+_46707700.23-P1P2	GCACCACACAGAGAACGACA	1	As3mt_+_46707681.23-P1P2	GGGGCTGAAGCCAAGATGGA	2	As3mt_+_46707700.23-P1P2|As3mt_+_46707681.23-P1P2
Nceh1	P1P2	Nceh1_+_27183037.23-P1P2	GTCCGGAGCTGACCGCGGTA	1	Nceh1_+_27183042.23-P1P2	GGGCTGTCCGGAGCTGACCG	2	Nceh1_+_27183037.23-P1P2|Nceh1_+_27183042.23-P1P2
Palld	ENSMUST00000121785.1,ENSMUST00000034057.7	Palld_-_61902623.23-ENSMUST00000121785.1,ENSMUST00000034057.7	GAAGGCAATGGATTTCCCAG	1	Palld_-_61902605.23-ENSMUST00000121785.1,ENSMUST00000034057.7	GTGGTTTGAAGCCTTCCCAA	2	Palld_-_61902623.23-ENSMUST00000121785.1,ENSMUST00000034057.7|Palld_-_61902605.23-ENSMUST00000121785.1,ENSMUST00000034057.7
Mroh5	ENSMUST00000110021.2	Mroh5_+_73819369.23-ENSMUST00000110021.2	GCAGCTGTTCCAGGTCTTGG	1	Mroh5_-_73819417.23-ENSMUST00000110021.2	GTGTGTCGGCAGGAGATCTG	2	Mroh5_+_73819369.23-ENSMUST00000110021.2|Mroh5_-_73819417.23-ENSMUST00000110021.2
Ccdc18	P1P2	Ccdc18_+_108132898.23-P1P2	GACTCTCGCAGCCCACGACA	1	Ccdc18_+_108132855.23-P1P2	GGAGAACCAGCGAACCTCCG	2	Ccdc18_+_108132898.23-P1P2|Ccdc18_+_108132855.23-P1P2
Tfdp2	P1	Tfdp2_+_96196353.23-P1	GCCCGCGTGCCAGGCAGCGA	1	Tfdp2_+_96196386.23-P1	GGAAGCCTGCAGTGCAGGAA	2	Tfdp2_+_96196353.23-P1|Tfdp2_+_96196386.23-P1
Zfp551	P1P2	Zfp551_+_12422466.23-P1P2	GATGCCCCGAGCCAGGCCTA	1	Zfp551_-_12422436.23-P1P2	GCAGCCATTGGATTCTGTAG	2	Zfp551_+_12422466.23-P1P2|Zfp551_-_12422436.23-P1P2
Wdr95	P1P2	Wdr95_-_149529727.23-P1P2	GGGATAGCTATCCTCGGTAT	1	Wdr95_-_149529721.23-P1P2	GGGTATGGGATAGCTATCCT	2	Wdr95_-_149529727.23-P1P2|Wdr95_-_149529721.23-P1P2
Tpbpb	P1P2	Tpbpb_-_60904767.23-P1P2	GATCTGCTCTGGCAGAGTCA	1	Tpbpb_+_60904444.23-P1P2	GTCTGTGCAGAAGGAATACC	2	Tpbpb_-_60904767.23-P1P2|Tpbpb_+_60904444.23-P1P2
Orm3	P1P2	Orm3_+_63356181.23-P1P2	GCCATGCTGAGGATACTCAG	1	Orm3_+_63356424.23-P1P2	GCACCAGGGTATACACAAGT	2	Orm3_+_63356181.23-P1P2|Orm3_+_63356424.23-P1P2
1700003E16Rik	P1P2	1700003E16Rik_-_83156535.23-P1P2	GCAACGATGGAGGGTCCTGA	1	1700003E16Rik_+_83156488.23-P1P2	GTGCAGTGGCCGCGACCCAA	2	1700003E16Rik_-_83156535.23-P1P2|1700003E16Rik_+_83156488.23-P1P2
Hist4h4	ENSMUST00000179285.1	Hist4h4_+_136804356.23-ENSMUST00000179285.1	GTGTCAGGACGAGGAAAAGG	1	Hist4h4_+_136804371.23-ENSMUST00000179285.1	GGGTTGTTTACTAATATGTC	2	Hist4h4_+_136804356.23-ENSMUST00000179285.1|Hist4h4_+_136804371.23-ENSMUST00000179285.1
Ifna5	ENSMUST00000102804.1	Ifna5_-_88835908.23-ENSMUST00000102804.1	GTGTGTGATGCAACAGGTCG	1	Ifna5_-_88835902.23-ENSMUST00000102804.1	GAAAGCCTGTGTGATGCAAC	2	Ifna5_-_88835908.23-ENSMUST00000102804.1|Ifna5_-_88835902.23-ENSMUST00000102804.1
Gm4787	ENSMUST00000062182.7	Gm4787_-_81379486.23-ENSMUST00000062182.7	GTACAACCCTGCTAAGTAAA	1	Gm4787_+_81378975.23-ENSMUST00000062182.7	GCACTAGATACCTGCACTGG	2	Gm4787_-_81379486.23-ENSMUST00000062182.7|Gm4787_+_81378975.23-ENSMUST00000062182.7
Thap4	P1P2	Thap4_+_93754598.23-P1P2	GGTGTCGCCGCGCTCCCTCG	1	Thap4_+_93754595.23-P1P2	GTCGCCGCGCTCCCTCGGGG	2	Thap4_+_93754598.23-P1P2|Thap4_+_93754595.23-P1P2
Cd163l1	P1P2	Cd163l1_-_140218340.23-P1P2	GCTTCAGTGGTTATCAGTAT	1	Cd163l1_+_140218441.23-P1P2	GTACAGTAAGAGCCTCTCCA	2	Cd163l1_-_140218340.23-P1P2|Cd163l1_+_140218441.23-P1P2
Obfc1	P1P2	Obfc1_-_47536939.23-P1P2	GTCACCTCTGGGAAGAGCGG	1	Obfc1_+_47537010.23-P1P2	GCTCGCAACCGGAACTGGTT	2	Obfc1_-_47536939.23-P1P2|Obfc1_+_47537010.23-P1P2
Slc39a7	P1P2	Slc39a7_+_34031625.23-P1P2	GTCGGGGCGCAGGCAAGAAA	1	Slc39a7_-_34031549.23-P1P2	GAGCAGCAGGGACCTCTCAC	2	Slc39a7_+_34031625.23-P1P2|Slc39a7_-_34031549.23-P1P2
Gabbr1	P2	Gabbr1_-_37050666.23-P2	GCGGCGAGGAGAGTCCGCGG	1	Gabbr1_+_37050624.23-P2	GGACTGACCGACCGACAGAA	2	Gabbr1_-_37050666.23-P2|Gabbr1_+_37050624.23-P2
Apbb2	P1P2	Apbb2_+_66618664.23-P1P2	GAGCCAGTGCTGCTCTAAGT	1	Apbb2_-_66618645.23-P1P2	GTGAGCACCCGGATCAGCTG	2	Apbb2_+_66618664.23-P1P2|Apbb2_-_66618645.23-P1P2
Nol12	P1P2	Nol12_+_78935173.23-P1P2	GGAGCTCCAGCTACATCCAG	1	Nol12_+_78935231.23-P1P2	GGTAAACAGCGAGGGAGGAG	2	Nol12_+_78935173.23-P1P2|Nol12_+_78935231.23-P1P2
Tmco5	P1P2	Tmco5_-_116878771.23-P1P2	GAAGCACATCGGTAGAAGGG	1	Tmco5_-_116878786.23-P1P2	GAGGGAGGTAGAGTTTGTAG	2	Tmco5_-_116878771.23-P1P2|Tmco5_-_116878786.23-P1P2
Gng12	P1P2	Gng12_-_66896478.23-P1P2	GGGAGAGCCGGACTCCCAgg	1	Gng12_-_66896527.23-P1P2	GcggcgAAGAGTGAGTGCCA	2	Gng12_-_66896478.23-P1P2|Gng12_-_66896527.23-P1P2
Slc24a5	P1P2	Slc24a5_+_125068255.23-P1P2	GGCAGGGAGACACCACGGAC	1	Slc24a5_-_125068216.23-P1P2	GGGCCCAACTTGGACAAGGA	2	Slc24a5_+_125068255.23-P1P2|Slc24a5_-_125068216.23-P1P2
Col9a1	P1P2	Col9a1_+_24195266.23-P1P2	GGGACTTCCAAATTCACCCA	1	Col9a1_-_24195331.23-P1P2	GTGGGGTATAGAAGTCTAGA	2	Col9a1_+_24195266.23-P1P2|Col9a1_-_24195331.23-P1P2
Rora	P1P2	Rora_-_69289985.23-P1P2	GGGCTCCGGGGTCGGACGGT	1	Rora_+_69289968.23-P1P2	GAGAGCCGACCGTCCGACCC	2	Rora_-_69289985.23-P1P2|Rora_+_69289968.23-P1P2
Cdc7	P1P2	Cdc7_-_106964391.23-P1P2	GCTCAGTGGGACGCTCCTGA	1	Cdc7_-_106964403.23-P1P2	GCTCCTGAGGGAAGCGACCG	2	Cdc7_-_106964391.23-P1P2|Cdc7_-_106964403.23-P1P2
Vdac2	P1P2	Vdac2_+_21831558.23-P1P2	GCGGCTGGAGGGCGAAGTGA	1	Vdac2_-_21831552.23-P1P2	GGGCTTGCGGCGGGGCGCAA	2	Vdac2_+_21831558.23-P1P2|Vdac2_-_21831552.23-P1P2
Smap2	P1P2	Smap2_+_121017165.23-P1P2	GCCGAGGCGGGAAGCACAGC	1	Smap2_+_121017226.23-P1P2	GAAGAGCTGCCGGAAGTAGG	2	Smap2_+_121017165.23-P1P2|Smap2_+_121017226.23-P1P2
Fgf10	P1P2	Fgf10_-_118714719.23-P1P2	GGGCTTTCCAAGGGACTTGG	1	Fgf10_-_118714699.23-P1P2	GGCTTCAACCTGTTTACAAG	2	Fgf10_-_118714719.23-P1P2|Fgf10_-_118714699.23-P1P2
Tifab	P1P2	Tifab_+_56178636.23-P1P2	GACAGTGCACGCCCGAACCA	1	Tifab_-_56178621.23-P1P2	GCCTGGGCTGGAGGAAGACC	2	Tifab_+_56178636.23-P1P2|Tifab_-_56178621.23-P1P2
Scn4a	P1P2	Scn4a_-_106349370.23-P1P2	GGACCAGGGGGGACCAGGGT	1	Scn4a_-_106349549.23-P1P2	GGTCAGGGAGGTGGGTGTCC	2	Scn4a_-_106349370.23-P1P2|Scn4a_-_106349549.23-P1P2
Tfdp1	P1P2	Tfdp1_+_13338800.23-P1P2	GCGGGACGCGGGCTCACCCT	1	Tfdp1_+_13338812.23-P1P2	GAGCCAGCGGCGCCGGGACG	2	Tfdp1_+_13338800.23-P1P2|Tfdp1_+_13338812.23-P1P2
AI593442	P1P2	AI593442_-_52679364.23-P1P2	GGACCAAGCCGGAGGACCCG	1	AI593442_-_52679460.23-P1P2	GGCTAGCCTCCACCAGGGAA	2	AI593442_-_52679364.23-P1P2|AI593442_-_52679460.23-P1P2
Ptov1	P1P2	Ptov1_+_44869629.23-P1P2	GGGCCGCGGCGACCCCTCAG	1	Ptov1_-_44869672.23-P1P2	GGAACCACTGCAGCGAACAG	2	Ptov1_+_44869629.23-P1P2|Ptov1_-_44869672.23-P1P2
Sspn	P1P2	Sspn_+_145934190.23-P1P2	GAGGCAGCTCCTGAGCCCTG	1	Sspn_-_145934169.23-P1P2	GCAGGCGCAGGCACCACCGA	2	Sspn_+_145934190.23-P1P2|Sspn_-_145934169.23-P1P2
Olfr1351	ENSMUST00000080730.1	Olfr1351_-_79017326.23-ENSMUST00000080730.1	GCATAGGCGTGTCAAACACA	1	Olfr1351_+_79017423.23-ENSMUST00000080730.1	GGTGACAGTCACTAGGTACA	2	Olfr1351_-_79017326.23-ENSMUST00000080730.1|Olfr1351_+_79017423.23-ENSMUST00000080730.1
Kdm5d	P1P2	Kdm5d_-_897824.23-P1P2	GATGGTGGAACCGAACGAGG	1	Kdm5d_-_897821.23-P1P2	GAAAATGGTGGAACCGAACG	2	Kdm5d_-_897824.23-P1P2|Kdm5d_-_897821.23-P1P2
Rep15	P1P2	Rep15_-_147032572.23-P1P2	GGTGGTGGCTTTAACAGATG	1	Rep15_-_147032783.23-P1P2	GGAAGCTGAAGGAGTACCTC	2	Rep15_-_147032572.23-P1P2|Rep15_-_147032783.23-P1P2
Olfr884	ENSMUST00000181088.1	Olfr884_-_38046630.23-ENSMUST00000181088.1	GCTCAGAATCCCAAAGAATG	1	Olfr884_-_38046810.23-ENSMUST00000181088.1	GATCCGGTCTCAAACTACAA	2	Olfr884_-_38046630.23-ENSMUST00000181088.1|Olfr884_-_38046810.23-ENSMUST00000181088.1
E030019B06Rik	P1P2	E030019B06Rik_+_139616306.23-P1P2	GGACACCTGGGGGAGAGCAG	1	E030019B06Rik_-_139616084.23-P1P2	GCCAGTTGGCCTCAGGCTAG	2	E030019B06Rik_+_139616306.23-P1P2|E030019B06Rik_-_139616084.23-P1P2
Hsp90aa1	P1P2	Hsp90aa1_-_110696343.23-P1P2	GCTGCGCCGGCCTTATATAG	1	Hsp90aa1_+_110696315.23-P1P2	GATAAGGCCGGCGCAGGGGG	2	Hsp90aa1_-_110696343.23-P1P2|Hsp90aa1_+_110696315.23-P1P2
Olfr822	ENSMUST00000080460.2	Olfr822_+_130074419.23-ENSMUST00000080460.2	GGAAAATTGTCACCCTTGTA	1	Olfr822_+_130074387.23-ENSMUST00000080460.2	GTGATTCTCTGACTGTTATA	2	Olfr822_+_130074419.23-ENSMUST00000080460.2|Olfr822_+_130074387.23-ENSMUST00000080460.2
Prpmp5	ENSMUST00000048686.8	Prpmp5_+_132314569.23-ENSMUST00000048686.8	GGGAGATAGAAAACCGACAG	1	Prpmp5_+_132314329.23-ENSMUST00000048686.8	GGTGTTTGCCTTGTTTGTAG	2	Prpmp5_+_132314569.23-ENSMUST00000048686.8|Prpmp5_+_132314329.23-ENSMUST00000048686.8
Tapt1	P1P2	Tapt1_+_44226565.23-P1P2	GACGCGGCCGCCCCGGGAGA	1	Tapt1_+_44226596.23-P1P2	GTGTGGCTCTCGGAACATGG	2	Tapt1_+_44226565.23-P1P2|Tapt1_+_44226596.23-P1P2
Ufsp2	P1P2	Ufsp2_+_45975569.23-P1P2	GTACCAAGCACCACTGGCGA	1	Ufsp2_+_45975612.23-P1P2	GCCTAGGGGTAAATACGGGG	2	Ufsp2_+_45975569.23-P1P2|Ufsp2_+_45975612.23-P1P2
Nek2	P1P2	Nek2_-_191821558.23-P1P2	GACTCAGGCAGGCAGACGAG	1	Nek2_-_191821725.23-P1P2	GCCGCTGTCAGAAGATTCGG	2	Nek2_-_191821558.23-P1P2|Nek2_-_191821725.23-P1P2
Dlg3	P1	Dlg3_+_100777349.23-P1	GTGGCGCTCAGTCGGAGTCC	1	Dlg3_+_100777518.23-P1	GGCAGTCGAGGAAGCCAAGG	2	Dlg3_+_100777349.23-P1|Dlg3_+_100777518.23-P1
Tm6sf2	P1P2	Tm6sf2_+_70072992.23-P1P2	GGCTAGGGGCGGGATGTCCA	1	Tm6sf2_+_70072986.23-P1P2	GGGCGGGATGTCCATGGCAG	2	Tm6sf2_+_70072992.23-P1P2|Tm6sf2_+_70072986.23-P1P2
Myoz1	P1P2	Myoz1_+_20656457.23-P1P2	GCCGAAGCTGCTGGACCCCG	1	Myoz1_+_20656419.23-P1P2	GTGAGCAGCTGGTAAGTCTA	2	Myoz1_+_20656457.23-P1P2|Myoz1_+_20656419.23-P1P2
Atg2b	P1P2	Atg2b_+_105685247.23-P1P2	GGAGTACGTGCCGGGAGTCT	1	Atg2b_-_105685177.23-P1P2	GGCGAGACAAGACTCCGACG	2	Atg2b_+_105685247.23-P1P2|Atg2b_-_105685177.23-P1P2
Clec4b2	P1P2	Clec4b2_-_123172939.23-P1P2	GCTAGTGAATTTAGCTTAGG	1	Clec4b2_-_123173086.23-P1P2	GGACCAGCCCAAGGTAAGGT	2	Clec4b2_-_123172939.23-P1P2|Clec4b2_-_123173086.23-P1P2
Nlrp4c	P1P2	Nlrp4c_+_6045211.23-P1P2	GTTGCTGACTCACCGCCCTG	1	Nlrp4c_+_6045325.23-P1P2	GCTGGTGTGTCAAGGCACGA	2	Nlrp4c_+_6045211.23-P1P2|Nlrp4c_+_6045325.23-P1P2
Chrdl1	P1P2	Chrdl1_+_143393873.23-P1P2	GTGCGAGCCCCAGACCTCGG	1	Chrdl1_+_143393876.23-P1P2	GACCTGCGAGCCCCAGACCT	2	Chrdl1_+_143393873.23-P1P2|Chrdl1_+_143393876.23-P1P2
Cacng3	P1P2	Cacng3_+_122671386.23-P1P2	GCACAGCCCCGAGAGACTCA	1	Cacng3_-_122671376.23-P1P2	GtcacacacCAGACCTCTCT	2	Cacng3_+_122671386.23-P1P2|Cacng3_-_122671376.23-P1P2
Fam193a	P1P2	Fam193a_+_34369948.23-P1P2	GCAGAGTTAAGAGTCCAATA	1	Fam193a_-_34369977.23-P1P2	GGACTCTTAACTCTGGTCAG	2	Fam193a_+_34369948.23-P1P2|Fam193a_-_34369977.23-P1P2
Zfp334	P1P2	Zfp334_+_165388234.23-P1P2	GCTTCCAGGCGAGGCTCGAG	1	Zfp334_-_165388270.23-P1P2	GCTGGAAGAGCCCCACGAAA	2	Zfp334_+_165388234.23-P1P2|Zfp334_-_165388270.23-P1P2
Adamdec1	P1P2	Adamdec1_-_68582039.23-P1P2	GTGGGTAGCCGAGAAGTCCC	1	Adamdec1_-_68582067.23-P1P2	GACAGCTATGGTCTCTCCAG	2	Adamdec1_-_68582039.23-P1P2|Adamdec1_-_68582067.23-P1P2
Dscc1	P1P2	Dscc1_-_55090441.23-P1P2	GGACATCTCGCAGCACGGAG	1	Dscc1_-_55090418.23-P1P2	GTCCTCCGGGAAGCGCTCGG	2	Dscc1_-_55090441.23-P1P2|Dscc1_-_55090418.23-P1P2
Rpa2	P1P2	Rpa2_-_132768380.23-P1P2	GGAAGGCTGCCACGCCAGAG	1	Rpa2_+_132768390.23-P1P2	GACGAAAACTAAGAACACTT	2	Rpa2_-_132768380.23-P1P2|Rpa2_+_132768390.23-P1P2
Ctgf	P1P2	Ctgf_-_24595578.23-P1P2	GGAGACCGACCTCCTCCAGA	1	Ctgf_+_24595759.23-P1P2	GCAGAGAGCGAGGAGCACCA	2	Ctgf_-_24595578.23-P1P2|Ctgf_+_24595759.23-P1P2
C1ql4	ENSMUST00000064462.3	C1ql4_-_99087741.23-ENSMUST00000064462.3	GAGCACCATGGCCACCCCGA	1	C1ql4_-_99087767.23-ENSMUST00000064462.3	GGCCCGCCACCCGCTTGCGG	2	C1ql4_-_99087741.23-ENSMUST00000064462.3|C1ql4_-_99087767.23-ENSMUST00000064462.3
Zfp623	P1P2	Zfp623_+_75941092.23-P1P2	GCATCCAGGCGGGTAACCCC	1	Zfp623_+_75941106.23-P1P2	GACCAAGCCGAGCAGCATCC	2	Zfp623_+_75941092.23-P1P2|Zfp623_+_75941106.23-P1P2
Plekhh2	P1P2	Plekhh2_-_84511909.23-P1P2	GCGGCGCGGGCTGAGAGCCG	1	Plekhh2_-_84511968.23-P1P2	GCAGGCGCCGCCGCAGAGGT	2	Plekhh2_-_84511909.23-P1P2|Plekhh2_-_84511968.23-P1P2
Pglyrp2	P2	Pglyrp2_-_32424075.23-P2	Gaggagagaggaacttctgt	1	Pglyrp2_+_32424048.23-P2	Ggaagttcctctctcctcaa	2	Pglyrp2_-_32424075.23-P2|Pglyrp2_+_32424048.23-P2
Pter	P1P2	Pter_-_12924134.23-P1P2	GAGTTCCCAGGGGGAGAAGG	1	Pter_-_12924125.23-P1P2	GCTCAAGTCAAGTTCCCAGG	2	Pter_-_12924134.23-P1P2|Pter_-_12924125.23-P1P2
Eif3f	P1P2	Eif3f_+_108934444.23-P1P2	GGGAGGGACATTAGCCGGTA	1	Eif3f_+_108934449.23-P1P2	GTGGCAGGAGGGACATTAGC	2	Eif3f_+_108934444.23-P1P2|Eif3f_+_108934449.23-P1P2
Themis2	P1P2	Themis2_-_132796311.23-P1P2	GCACGCGCGGAAGGGAGGTG	1	Themis2_+_132796349.23-P1P2	GTCTAGTCGGAACGCGACCA	2	Themis2_-_132796311.23-P1P2|Themis2_+_132796349.23-P1P2
Zcchc14	P1P2	Zcchc14_-_121652823.23-P1P2	GGCGCGGCGGAGGGATCCAG	1	Zcchc14_-_121652886.23-P1P2	GAGAGCGCGCTCGCGAGCAC	2	Zcchc14_-_121652823.23-P1P2|Zcchc14_-_121652886.23-P1P2
Sertad1	P1P2	Sertad1_-_27487013.23-P1P2	GGAACAAGCTAGCGATGCTA	1	Sertad1_+_27486961.23-P1P2	GAACCGACACCTGGGACGGT	2	Sertad1_-_27487013.23-P1P2|Sertad1_+_27486961.23-P1P2
Gm382	P1P2	Gm382_+_127040012.23-P1P2	GGTAAGCTTGATACCTGGAA	1	Gm382_+_127039982.23-P1P2	GCCAGACTGGACAAAGCTGG	2	Gm382_+_127040012.23-P1P2|Gm382_+_127039982.23-P1P2
Vstm2b	P1P2	Vstm2b_-_40898847.23-P1P2	GACGCCAGGTCTGCACGCCG	1	Vstm2b_+_40898829.23-P1P2	GCAGCCGCGGCGTGCAGACC	2	Vstm2b_-_40898847.23-P1P2|Vstm2b_+_40898829.23-P1P2
Elf4	P1P2	Elf4_+_48454134.23-P1P2	GCCTCGGCGCAGCTCTCCAG	1	Elf4_-_48454125.23-P1P2	GGGCACCCGCTGATGAGGAG	2	Elf4_+_48454134.23-P1P2|Elf4_-_48454125.23-P1P2
Cds2	P1P2	Cds2_-_132263244.23-P1P2	GGCGGCCGCTGGGGAAACAG	1	Cds2_-_132263503.23-P1P2	GCCTCCGGAGGACAAGGTAG	2	Cds2_-_132263244.23-P1P2|Cds2_-_132263503.23-P1P2
Lynx1	P1P2	Lynx1_-_74752977.23-P1P2	GCATCGCAGGCAGGCCAAGT	1	Lynx1_-_74752988.23-P1P2	GGGCCAAGTAGGCTCCGCCG	2	Lynx1_-_74752977.23-P1P2|Lynx1_-_74752988.23-P1P2
Il13ra1	P1P2	Il13ra1_-_36112139.23-P1P2	GGAAGTGGGAGCAAGAACAG	1	Il13ra1_-_36112157.23-P1P2	GGAGGAGGCGGAGACTGCCG	2	Il13ra1_-_36112139.23-P1P2|Il13ra1_-_36112157.23-P1P2
Esrrb	P1	Esrrb_+_86421677.23-P1	GCAGAGGGGACGCCAAGCCG	1	Esrrb_+_86421674.23-P1	GAGGGGACGCCAAGCCGTGG	2	Esrrb_+_86421677.23-P1|Esrrb_+_86421674.23-P1
Htra3	P1	Htra3_-_35679429.23-P1	GCTGGCCCGGAGCGCAAACA	1	Htra3_+_35679448.23-P1	GAGCTCGGCTGAGAGAGGCC	2	Htra3_-_35679429.23-P1|Htra3_+_35679448.23-P1
Gid4	P1P2	Gid4_-_60417439.23-P1P2	Gtgtacccgcgagggcaagt	1	Gid4_-_60417497.23-P1P2	GGCAGGTCTCCGGGTCCAGG	2	Gid4_-_60417439.23-P1P2|Gid4_-_60417497.23-P1P2
Uba2	P1P2	Uba2_-_34168561.23-P1P2	GGGAGGCGGGAGAACCAGAG	1	Uba2_+_34168527.23-P1P2	GCCCGCCTCCGACTGTGAGG	2	Uba2_-_34168561.23-P1P2|Uba2_+_34168527.23-P1P2
Hpgds	P1P2	Hpgds_+_65144689.23-P1P2	GAGACACGGAGACACGGCAC	1	Hpgds_-_65144632.23-P1P2	GTCTCAAGCTGGGGAAGACG	2	Hpgds_+_65144689.23-P1P2|Hpgds_-_65144632.23-P1P2
Krt2	P1P2	Krt2_+_101818157.23-P1P2	GGTCTCCCGACAGCACACTT	1	Krt2_-_101818149.23-P1P2	GATATTCCTGAGCAGATCCG	2	Krt2_+_101818157.23-P1P2|Krt2_-_101818149.23-P1P2
1700013H16Rik	P1P2	1700013H16Rik_+_53757768.23-P1P2	GGGCCGCTGAAGCCGACCAG	1	1700013H16Rik_-_53757814.23-P1P2	GGAGGAGAGGCCAAGACCTC	2	1700013H16Rik_+_53757768.23-P1P2|1700013H16Rik_-_53757814.23-P1P2
Gm9846	ENSMUST00000053150.5	Gm9846_-_114982744.23-ENSMUST00000053150.5	GCGTCACCGCCGGAAAGCAA	1	Gm9846_+_114982728.23-ENSMUST00000053150.5	GCTTATCCCTTGCTTTCCGG	2	Gm9846_-_114982744.23-ENSMUST00000053150.5|Gm9846_+_114982728.23-ENSMUST00000053150.5
Lrrc26	P1P2	Lrrc26_+_25290246.23-P1P2	GCATTGGCGAAGGCACCCGG	1	Lrrc26_-_25289941.23-P1P2	Ggttaatacttgtgcaggtg	2	Lrrc26_+_25290246.23-P1P2|Lrrc26_-_25289941.23-P1P2
Acsl1	P1P2	Acsl1_-_46471252.23-P1P2	GTGAGTGCGCCAGCCGCGAA	1	Acsl1_+_46471655.23-P1P2	GGCAGGGGCACGTCACAGAG	2	Acsl1_-_46471252.23-P1P2|Acsl1_+_46471655.23-P1P2
Kcnh7	P1P2	Kcnh7_+_63184267.23-P1P2	GGTGCGAGGCCCCCTCCGGA	1	Kcnh7_+_63184250.23-P1P2	GGAAGGTGAGCGGGATGGAT	2	Kcnh7_+_63184267.23-P1P2|Kcnh7_+_63184250.23-P1P2
Etv2	P1P2	Etv2_-_30636302.23-P1P2	GTGCGCACGGGTCCCTGGAA	1	Etv2_-_30636473.23-P1P2	GGTGTGACATGAAAAGTGGT	2	Etv2_-_30636302.23-P1P2|Etv2_-_30636473.23-P1P2
Bdkrb1	ENSMUST00000041229.4	Bdkrb1_+_105604124.23-ENSMUST00000041229.4	GAGGAggccaagcccagctg	1	Bdkrb1_+_105604169.23-ENSMUST00000041229.4	GGGCCTGGGACGCCATCCAC	2	Bdkrb1_+_105604124.23-ENSMUST00000041229.4|Bdkrb1_+_105604169.23-ENSMUST00000041229.4
Chac2	P1P2	Chac2_-_30986299.23-P1P2	GGAACGAGACTGCTACCGAG	1	Chac2_-_30986308.23-P1P2	GTGCTACCGAGGGGAGTAAC	2	Chac2_-_30986299.23-P1P2|Chac2_-_30986308.23-P1P2
Commd4	P1P2	Commd4_+_57158287.23-P1P2	GGCCGGAAGAAGCTCTGGAT	1	Commd4_+_57158292.23-P1P2	GGTCAAGCCGGAAGAAGCTC	2	Commd4_+_57158287.23-P1P2|Commd4_+_57158292.23-P1P2
Commd3	P1P2	Commd3_-_18672492.23-P1P2	GTCTCGGAGTCTGTGCAAAG	1	Commd3_+_18672519.23-P1P2	GGCGAAGGCGTTGGAGTCAA	2	Commd3_-_18672492.23-P1P2|Commd3_+_18672519.23-P1P2
Btc	P1P2	Btc_-_91402890.23-P1P2	GCAGAGCAGGGAAACACCCG	1	Btc_-_91402878.23-P1P2	GGCAGCCTGCCTACAGAGCA	2	Btc_-_91402890.23-P1P2|Btc_-_91402878.23-P1P2
Mapk14	P1P2	Mapk14_+_28691412.23-P1P2	GCCAGTGGCGGCGATCCCAC	1	Mapk14_-_28691446.23-P1P2	GCGCCACTGGAGCCCAAGCG	2	Mapk14_+_28691412.23-P1P2|Mapk14_-_28691446.23-P1P2
Zfp873	P1P2	Zfp873_-_82048144.23-P1P2	GGGTTTGACTGTGAGTCTTA	1	Zfp873_-_82048156.23-P1P2	GAGTCTTAGGGAAGCTCTTG	2	Zfp873_-_82048144.23-P1P2|Zfp873_-_82048156.23-P1P2
Olfr209	ENSMUST00000055868.3	Olfr209_+_59362201.23-ENSMUST00000055868.3	GGGGTGTGATGGAGCTGAAC	1	Olfr209_+_59361935.23-ENSMUST00000055868.3	GAGAATGACATGATATCCAT	2	Olfr209_+_59362201.23-ENSMUST00000055868.3|Olfr209_+_59361935.23-ENSMUST00000055868.3
Sec23a	P1P2	Sec23a_-_59011935.23-P1P2	GGCCGTGGCACCGCAATCAg	1	Sec23a_+_59011872.23-P1P2	GGACTGACGACTGTGCAAGG	2	Sec23a_-_59011935.23-P1P2|Sec23a_+_59011872.23-P1P2
Spink4	P1P2	Spink4_+_40920133.23-P1P2	GCCCTGTCCATGCCAAGGAG	1	Spink4_+_40920119.23-P1P2	GAGGAGGGGAACCAAGGTCA	2	Spink4_+_40920133.23-P1P2|Spink4_+_40920119.23-P1P2
Nubpl	P1P2	Nubpl_-_52097794.23-P1P2	GGCCGCGCGCCATGGGGACC	1	Nubpl_-_52097788.23-P1P2	GGCAAGAGCCGCGCGCCATG	2	Nubpl_-_52097794.23-P1P2|Nubpl_-_52097788.23-P1P2
Trim12c	P1P2	Trim12c_+_104353326.23-P1P2	GCGTTTCTCTAGCTTCGAGT	1	Trim12c_-_104352942.23-P1P2	GGAAAGGGAATGTCTGTGGT	2	Trim12c_+_104353326.23-P1P2|Trim12c_-_104352942.23-P1P2
Cybb	P1P2	Cybb_-_9469260.23-P1P2	GCAGTTCCCCATGTTAGCAA	1	Cybb_-_9469271.23-P1P2	GGTTAGCAAAGGTTAAGTGT	2	Cybb_-_9469260.23-P1P2|Cybb_-_9469271.23-P1P2
BC100530	P1P2	BC100530_-_36367627.23-P1P2	GCTTATCTCCGAAATATCTG	1	BC100530_+_36367224.23-P1P2	GACCTAATCACACTTTTTAC	2	BC100530_-_36367627.23-P1P2|BC100530_+_36367224.23-P1P2
Arc	P1P2	Arc_-_74672528.23-P1P2	GGTCGCCGCTGAAGCTAGAG	1	Arc_+_74672346.23-P1P2	GAGCTGGACCATATGACCAC	2	Arc_-_74672528.23-P1P2|Arc_+_74672346.23-P1P2
Nkd2	P1P2	Nkd2_-_73847586.23-P1P2	GGCCCGGCAACCGGAGACAC	1	Nkd2_-_73847527.23-P1P2	GCCGAGCTGAGAGCAACTCG	2	Nkd2_-_73847586.23-P1P2|Nkd2_-_73847527.23-P1P2
Ccnk	P1P2	Ccnk_+_108179911.23-P1P2	GCACCAGGAGCGCAGACGGT	1	Ccnk_+_108179805.23-P1P2	GTCTTGGAGGTGGAATGTCG	2	Ccnk_+_108179911.23-P1P2|Ccnk_+_108179805.23-P1P2
Igkv1-115	ENSMUST00000168090.1	Igkv1-115_+_68161406.23-ENSMUST00000168090.1	GGTCAACAGAACATCGCTGC	1	Igkv1-115_+_68161583.23-ENSMUST00000168090.1	GGGAACACCAGAATGTCGTT	2	Igkv1-115_+_68161406.23-ENSMUST00000168090.1|Igkv1-115_+_68161583.23-ENSMUST00000168090.1
Tceal3	P1P2	Tceal3_-_136666508.23-P1P2	GAGCAGGACGAGCTGTGAGT	1	Tceal3_+_136666431.23-P1P2	GGTGCCAAGACCAGACCGTA	2	Tceal3_-_136666508.23-P1P2|Tceal3_+_136666431.23-P1P2
Micu3	ENSMUST00000068999.7	Micu3_-_40307657.23-ENSMUST00000068999.7	GCTCGGAGCATCAGAGAATT	1	Micu3_+_40307796.23-ENSMUST00000068999.7	GGCCACGCCGTGGTAGAGGA	2	Micu3_-_40307657.23-ENSMUST00000068999.7|Micu3_+_40307796.23-ENSMUST00000068999.7
Vmn2r59	ENSMUST00000168489.1	Vmn2r59_-_42058954.23-ENSMUST00000168489.1	GCAAACAAATTGGAATATAC	1	Vmn2r59_-_42058944.23-ENSMUST00000168489.1	GTAAAGGCACACAAACAAAT	2	Vmn2r59_-_42058954.23-ENSMUST00000168489.1|Vmn2r59_-_42058944.23-ENSMUST00000168489.1
Myo7b	P1P2	Myo7b_-_32036938.23-P1P2	GCACCCTGAAAGATCCAGGT	1	Myo7b_-_32036934.23-P1P2	GTGGGCACCCTGAAAGATCC	2	Myo7b_-_32036938.23-P1P2|Myo7b_-_32036934.23-P1P2
Ccm2	P1P2	Ccm2_-_6546947.23-P1P2	GgcccAGAGCGAGCATGTAG	1	Ccm2_-_6547005.23-P1P2	GgccgcacgcggcgACATGG	2	Ccm2_-_6546947.23-P1P2|Ccm2_-_6547005.23-P1P2
Cep55	P1P2	Cep55_-_38055044.23-P1P2	GCGGTGTCCTGGTTGATAAG	1	Cep55_-_38055051.23-P1P2	GCTGGTTGATAAGTGGTCTG	2	Cep55_-_38055044.23-P1P2|Cep55_-_38055051.23-P1P2
Eif4e2	P1P2	Eif4e2_-_87213991.23-P1P2	GGAGGCAGTGGCGACAGCGG	1	Eif4e2_-_87213973.23-P1P2	GGAGCGGAAGTCACTCCGTG	2	Eif4e2_-_87213991.23-P1P2|Eif4e2_-_87213973.23-P1P2
Olfr1164	ENSMUST00000099834.2	Olfr1164_+_88093921.23-ENSMUST00000099834.2	GCTGCTCAGGATGAATTCTG	1	Olfr1164_+_88093870.23-ENSMUST00000099834.2	GGAGGGAAATCGAAGCATGG	2	Olfr1164_+_88093921.23-ENSMUST00000099834.2|Olfr1164_+_88093870.23-ENSMUST00000099834.2
Lfng	P1P2	Lfng_-_140607378.23-P1P2	GCTCGGGCAGCCGGACCAGT	1	Lfng_+_140607410.23-P1P2	GCCGCACCGCTGGAGCATGG	2	Lfng_-_140607378.23-P1P2|Lfng_+_140607410.23-P1P2
Bend5	P1P2	Bend5_+_111415222.23-P1P2	GAGTCGCGCACGCACGACAC	1	Bend5_+_111414975.23-P1P2	GCTGGGCGCGGAAAAGGGAG	2	Bend5_+_111415222.23-P1P2|Bend5_+_111414975.23-P1P2
Idh3g	P1P2	Idh3g_+_73786642.23-P1P2	GGCTGTGCGAGCCATAGGAG	1	Idh3g_+_73786823.23-P1P2	GAGGTGGCGATAGCTGCTGG	2	Idh3g_+_73786642.23-P1P2|Idh3g_+_73786823.23-P1P2
Kctd9	P1P2	Kctd9_-_67716243.23-P1P2	GAAGGGCGGAGAGTCCGGGT	1	Kctd9_-_67716202.23-P1P2	GGTGCGTGCGTGAGGAGTGT	2	Kctd9_-_67716243.23-P1P2|Kctd9_-_67716202.23-P1P2
Spib	P1P2	Spib_+_44532021.23-P1P2	GTGGAGGCTGCACAGTAAGT	1	Spib_-_44532017.23-P1P2	GGTCCCAAGAACAGGATTGG	2	Spib_+_44532021.23-P1P2|Spib_-_44532017.23-P1P2
Slc38a6	P1P2	Slc38a6_-_73286938.23-P1P2	GGAGCACCATGCAGGCGTCC	1	Slc38a6_-_73286954.23-P1P2	GTCCCGGCACAGCATCCAAG	2	Slc38a6_-_73286938.23-P1P2|Slc38a6_-_73286954.23-P1P2
Ptpn7	P1P2	Ptpn7_-_135132762.23-P1P2	GCTGGCAAGAGGCAGCCTGG	1	Ptpn7_-_135132751.23-P1P2	GCTGACAGACAGCTGGCAAG	2	Ptpn7_-_135132762.23-P1P2|Ptpn7_-_135132751.23-P1P2
N6amt1	P1P2	N6amt1_+_87354276.23-P1P2	GGACCCACGTGCCCGTACAA	1	N6amt1_+_87354261.23-P1P2	GACAACGGCGTGGGGACACT	2	N6amt1_+_87354276.23-P1P2|N6amt1_+_87354261.23-P1P2
Tcerg1l	P1P2	Tcerg1l_+_138397584.23-P1P2	Ggccccagcagccccggtgg	1	Tcerg1l_-_138397516.23-P1P2	GCCAAGCCGGAGCAGCCCGG	2	Tcerg1l_+_138397584.23-P1P2|Tcerg1l_-_138397516.23-P1P2
Otud7b	P1P2	Otud7b_-_96104575.23-P1P2	GCCAGCCGCTGGAGTCGGAG	1	Otud7b_-_96104588.23-P1P2	GTCGGAGTGGCGACCCGGTG	2	Otud7b_-_96104575.23-P1P2|Otud7b_-_96104588.23-P1P2
Zfyve9	P1P2	Zfyve9_-_108780668.23-P1P2	GGCTTACGGCGGGACAACCG	1	Zfyve9_-_108780685.23-P1P2	GCGAGGCGATGCAGGCAGAC	2	Zfyve9_-_108780668.23-P1P2|Zfyve9_-_108780685.23-P1P2
Klrc2	ENSMUST00000071920.4,ENSMUST00000118401.1,ENSMUST00000119533.1	Klrc2_-_129660289.23-ENSMUST00000071920.4,ENSMUST00000118401.1,ENSMUST00000119533.1	GACTTGCATTATAACTGCAT	1	Klrc2_+_129660332.23-ENSMUST00000071920.4,ENSMUST00000118401.1,ENSMUST00000119533.1	GGGTGCCAGCAAGCATGCAG	2	Klrc2_-_129660289.23-ENSMUST00000071920.4,ENSMUST00000118401.1,ENSMUST00000119533.1|Klrc2_+_129660332.23-ENSMUST00000071920.4,ENSMUST00000118401.1,ENSMUST00000119533.1
Atxn1	P1P2	Atxn1_-_45964914.23-P1P2	GCTCTAGCTGCGGCTCCACA	1	Atxn1_-_45964955.23-P1P2	GCAGTGAAACAGGTCCTGTA	2	Atxn1_-_45964914.23-P1P2|Atxn1_-_45964955.23-P1P2
Atp13a1	P1P2	Atp13a1_+_69791320.23-P1P2	GGCAATCGCGACCCAGGCTG	1	Atp13a1_-_69791257.23-P1P2	GAGCGCAGCGCTGGGAAAGA	2	Atp13a1_+_69791320.23-P1P2|Atp13a1_-_69791257.23-P1P2
Aaas	P1P2	Aaas_-_102350651.23-P1P2	GGAGAGCGTCTGGAATCGAC	1	Aaas_-_102350610.23-P1P2	GGGCGGGGGGAACAACCCCA	2	Aaas_-_102350651.23-P1P2|Aaas_-_102350610.23-P1P2
BC028528	P1P2	BC028528_-_95891888.23-P1P2	GGTCAGAAGGAGACTTACCC	1	BC028528_-_95891910.23-P1P2	GATGAGTGGTGCAACAAGGA	2	BC028528_-_95891888.23-P1P2|BC028528_-_95891910.23-P1P2
Smyd5	P1P2	Smyd5_-_85432010.23-P1P2	GAGAGGCGTGCCCAAGATGG	1	Smyd5_+_85432011.23-P1P2	GGAGAACACGTCGCACATGG	2	Smyd5_-_85432010.23-P1P2|Smyd5_+_85432011.23-P1P2
Morc2a	P1P2	Morc2a_-_3649295.23-P1P2	GTGCGCTTACGGAGACAAAG	1	Morc2a_-_3649520.23-P1P2	GATTCCACGGGGAGGGACAA	2	Morc2a_-_3649295.23-P1P2|Morc2a_-_3649520.23-P1P2
Iqub	P1P2	Iqub_+_24515022.23-P1P2	GCAGAAAGGAGCTGCTTCCG	1	Iqub_-_24515011.23-P1P2	GATAGCTATCACAGACCAAG	2	Iqub_+_24515022.23-P1P2|Iqub_-_24515011.23-P1P2
Fhl3	P1P2	Fhl3_+_124700759.23-P1P2	GACCTGTGGGCCAGGCGGAG	1	Fhl3_+_124700711.23-P1P2	GCGGCTGCGACTGACTGTGT	2	Fhl3_+_124700759.23-P1P2|Fhl3_+_124700711.23-P1P2
Zfp120	P1P2	Zfp120_+_150136589.23-P1P2	GTCCTGGGTGCGGGGACCTC	1	Zfp120_+_150136566.23-P1P2	GAAGCCCAGAAGTTCCGACA	2	Zfp120_+_150136589.23-P1P2|Zfp120_+_150136566.23-P1P2
Prl7b1	P1P2	Prl7b1_+_27610534.23-P1P2	Gagtgccccacaaactgtgg	1	Prl7b1_-_27610551.23-P1P2	Gagttcctccacagtttgtg	2	Prl7b1_+_27610534.23-P1P2|Prl7b1_-_27610551.23-P1P2
Tmx2	P1P2	Tmx2_-_84677835.23-P1P2	GTCAAGGTCGAGAGCTGGTA	1	Tmx2_-_84677841.23-P1P2	GTCGAGAGCTGGTAAGGCAG	2	Tmx2_-_84677835.23-P1P2|Tmx2_-_84677841.23-P1P2
Gemin2	P1P2	Gemin2_+_59013435.23-P1P2	GCTCAATCGGCGCCCAGAGT	1	Gemin2_+_59013653.23-P1P2	GGCACCAGGGCTGTACACAG	2	Gemin2_+_59013435.23-P1P2|Gemin2_+_59013653.23-P1P2
Osbpl2	P1P2	Osbpl2_-_180119366.23-P1P2	GAGCACGGCGGGCTGTAGGT	1	Osbpl2_-_180119354.23-P1P2	GCGAGCGGCGAGCAGCACGG	2	Osbpl2_-_180119366.23-P1P2|Osbpl2_-_180119354.23-P1P2
Srgap1	P1P2	Srgap1_+_122047783.23-P1P2	GAGGCAGCGGAGGACCCTCG	1	Srgap1_+_122047834.23-P1P2	GGGCAGCAGCGGCCAGTGGG	2	Srgap1_+_122047783.23-P1P2|Srgap1_+_122047834.23-P1P2
2310002J15Rik	P1	2310002J15Rik_-_25239809.23-P1	GCTAGACAAGGACTCACCTG	1	2310002J15Rik_-_25239757.23-P1	GAGCGTCCAGGGGAGAGCAG	2	2310002J15Rik_-_25239809.23-P1|2310002J15Rik_-_25239757.23-P1
Gm14085	ENSMUST00000110521.2	Gm14085_+_122485201.23-ENSMUST00000110521.2	Ggttccttacctccattgta	1	Gm14085_-_122485403.23-ENSMUST00000110521.2	Gggtggagggactaaggaat	2	Gm14085_+_122485201.23-ENSMUST00000110521.2|Gm14085_-_122485403.23-ENSMUST00000110521.2
Ache	P1P2	Ache_-_137288315.23-P1P2	GAGCCTGCGCCGGGGAACAT	1	Ache_+_137288361.23-P1P2	GGGGTTGGGAGACTCACCTG	2	Ache_-_137288315.23-P1P2|Ache_+_137288361.23-P1P2
Vmn1r172	ENSMUST00000038694.7,ENSMUST00000173101.1	Vmn1r172_+_23658357.23-ENSMUST00000038694.7,ENSMUST00000173101.1	GCTTCCTTTGAAGACTCTCT	1	Vmn1r172_-_23658461.23-ENSMUST00000038694.7,ENSMUST00000173101.1	GCCTGATCCTTGATGTGATT	2	Vmn1r172_+_23658357.23-ENSMUST00000038694.7,ENSMUST00000173101.1|Vmn1r172_-_23658461.23-ENSMUST00000038694.7,ENSMUST00000173101.1
Recql5	P1P2	Recql5_+_115933448.23-P1P2	GACTTCGCTGACTTCTCGGG	1	Recql5_+_115933423.23-P1P2	GGGCTTCTGAGTTCGAGTTA	2	Recql5_+_115933448.23-P1P2|Recql5_+_115933423.23-P1P2
Them5	P1P2	Them5_+_94342154.23-P1P2	GGGACCAGGCACACCTAACA	1	Them5_+_94342168.23-P1P2	GAGGCAGCCTTGCTTGGACC	2	Them5_+_94342154.23-P1P2|Them5_+_94342168.23-P1P2
RP24-242F4.9	P1P2	RP24-242F4.9_-_67360528.23-P1P2	GATGTCAGAGATCCAAACGA	1	RP24-242F4.9_+_67360361.23-P1P2	GGTTGTGCTGACCTAGGCTA	2	RP24-242F4.9_-_67360528.23-P1P2|RP24-242F4.9_+_67360361.23-P1P2
Olfr889	ENSMUST00000072290.4	Olfr889_-_38115741.23-ENSMUST00000072290.4	GGTGATAGATTGAAGATGGA	1	Olfr889_-_38115737.23-ENSMUST00000072290.4	GTAGTGTGATAGATTGAAGA	2	Olfr889_-_38115741.23-ENSMUST00000072290.4|Olfr889_-_38115737.23-ENSMUST00000072290.4
Flnc	P1P2	Flnc_+_29433345.23-P1P2	GACTTCGTTAGCGCTCTGGG	1	Flnc_+_29433269.23-P1P2	GTCTCTCTCCCGGGGCGGAG	2	Flnc_+_29433345.23-P1P2|Flnc_+_29433269.23-P1P2
Ankrd63	P1P2	Ankrd63_+_118703810.23-P1P2	GGGAGCCACCCGCTCAACAG	1	Ankrd63_+_118703802.23-P1P2	GCCGCTCAACAGGGGAGCAG	2	Ankrd63_+_118703810.23-P1P2|Ankrd63_+_118703802.23-P1P2
Ifi44l	ENSMUST00000046739.4	Ifi44l_-_151762844.23-ENSMUST00000046739.4	GTCCTTCAGAGGCGGAGAGG	1	Ifi44l_-_151762882.23-ENSMUST00000046739.4	GCGGCTTCATCGGCTCACAG	2	Ifi44l_-_151762844.23-ENSMUST00000046739.4|Ifi44l_-_151762882.23-ENSMUST00000046739.4
Dido1	P1P2	Dido1_+_180701965.23-P1P2	GAATGGCTGCGGGATCCCGG	1	Dido1_+_180702029.23-P1P2	GGCGGCCTACCACTCTAGGA	2	Dido1_+_180701965.23-P1P2|Dido1_+_180702029.23-P1P2
Olfr827	ENSMUST00000058123.5	Olfr827_-_130210892.23-ENSMUST00000058123.5	GGAGTAGGAGAGGTCAATCA	1	Olfr827_-_130211035.23-ENSMUST00000058123.5	GGACACTGTGGAGCTCTGGA	2	Olfr827_-_130210892.23-ENSMUST00000058123.5|Olfr827_-_130211035.23-ENSMUST00000058123.5
Cdk20	P1P2	Cdk20_-_64432435.23-P1P2	GACTGCCGAAGGCTGCGGAA	1	Cdk20_-_64432430.23-P1P2	GGAGTGACTGCCGAAGGCTG	2	Cdk20_-_64432435.23-P1P2|Cdk20_-_64432430.23-P1P2
Ubxn6	P1P2	Ubxn6_-_56074999.23-P1P2	GGGAGCAGGCGGCCAACCAC	1	Ubxn6_+_56074611.23-P1P2	GTGTGTGGTGTAGCACGGGT	2	Ubxn6_-_56074999.23-P1P2|Ubxn6_+_56074611.23-P1P2
Kcna7	ENSMUST00000107774.1	Kcna7_-_45406014.23-ENSMUST00000107774.1	Gccgggcaatccgaaggatg	1	Kcna7_-_45406008.23-ENSMUST00000107774.1	Gtgtcacccgggcaatccga	2	Kcna7_-_45406014.23-ENSMUST00000107774.1|Kcna7_-_45406008.23-ENSMUST00000107774.1
Ube2j2	P1P2	Ube2j2_-_155943902.23-P1P2	GAGGCTGCTTGCGGCGGGTG	1	Ube2j2_+_155944114.23-P1P2	GCAGCCGGCGACGTAACCAA	2	Ube2j2_-_155943902.23-P1P2|Ube2j2_+_155944114.23-P1P2
Dcaf6	P1P2	Dcaf6_+_165460432.23-P1P2	GGTAGTCTGAGGAGAGTATG	1	Dcaf6_-_165460376.23-P1P2	GggcgccgcgACTCAGAGGG	2	Dcaf6_+_165460432.23-P1P2|Dcaf6_-_165460376.23-P1P2
Zcwpw1	P1P2	Zcwpw1_-_137787853.23-P1P2	GTCCTCGCGCCTTCTCCTGG	1	Zcwpw1_-_137787893.23-P1P2	GGTGGAAGGGATGTGCGGAA	2	Zcwpw1_-_137787853.23-P1P2|Zcwpw1_-_137787893.23-P1P2
Klk7	P1P2	Klk7_-_43811493.23-P1P2	GGCCTCGCCAAGTCACTCCC	1	Klk7_+_43811428.23-P1P2	GGTGTCTCCAGCCTTCTATA	2	Klk7_-_43811493.23-P1P2|Klk7_+_43811428.23-P1P2
Satb1	P1P2	Satb1_-_51832624.23-P1P2	GCGGCCGCCGCGGAAGTTAA	1	Satb1_-_51832443.23-P1P2	GCCCAGAGCGGGAGCAGCAC	2	Satb1_-_51832624.23-P1P2|Satb1_-_51832443.23-P1P2
Atp1a4	P1P2	Atp1a4_-_172258399.23-P1P2	GCAGCAGGTGGGAAGTGCAG	1	Atp1a4_-_172258408.23-P1P2	GGGAAGTGCAGTGGGAGCCG	2	Atp1a4_-_172258399.23-P1P2|Atp1a4_-_172258408.23-P1P2
Rnase6	P1P2	Rnase6_-_51129063.23-P1P2	GGCCTTCCTGTGCCCCACCT	1	Rnase6_+_51129053.23-P1P2	GGGTCACAGCTGCCTAGGTG	2	Rnase6_-_51129063.23-P1P2|Rnase6_+_51129053.23-P1P2
Rftn1	P1P2	Rftn1_+_50190407.23-P1P2	GGCGCGGCGGCCACTGGCTC	1	Rftn1_+_50190211.23-P1P2	GCTGGTCCCCTAAGGTAGGT	2	Rftn1_+_50190407.23-P1P2|Rftn1_+_50190211.23-P1P2
Alg5	P1P2	Alg5_-_54735586.23-P1P2	GCAAGTGTGGAGCTGCGGGA	1	Alg5_+_54735655.23-P1P2	GGGAGCACCGGACTCCACCA	2	Alg5_-_54735586.23-P1P2|Alg5_+_54735655.23-P1P2
Krtap26-1	P1P2	Krtap26-1_-_88647775.23-P1P2	GGGTCTAAGAGCAGCTGGGA	1	Krtap26-1_-_88647755.23-P1P2	GGAACTTGAGAGAGTGGTAG	2	Krtap26-1_-_88647775.23-P1P2|Krtap26-1_-_88647755.23-P1P2
Socs7	P1P2	Socs7_+_97362321.23-P1P2	GcccggAGCGACAGCGCTAA	1	Socs7_+_97362292.23-P1P2	GGGCCTCTGCCTCATAGAgg	2	Socs7_+_97362321.23-P1P2|Socs7_+_97362292.23-P1P2
Cdx4	ENSMUST00000033689.2	Cdx4_-_103321438.23-ENSMUST00000033689.2	GAGTAGTCCGAGCCGCGCAG	1	Cdx4_-_103321647.23-ENSMUST00000033689.2	GGAAGCAGTACAGCCGGAGT	2	Cdx4_-_103321438.23-ENSMUST00000033689.2|Cdx4_-_103321647.23-ENSMUST00000033689.2
Rbm25	P1P2	Rbm25_-_83632330.23-P1P2	GACCAGTCTCTAGAGTCGGG	1	Rbm25_-_83632327.23-P1P2	GGGAACCAGTCTCTAGAGTC	2	Rbm25_-_83632330.23-P1P2|Rbm25_-_83632327.23-P1P2
Vill	P2	Vill_-_119063524.23-P2	GGAAGGAAGAGGGTGTGTCC	1	Vill_-_119063498.23-P2	GTAGCGAGGTGTGTCCCCTA	2	Vill_-_119063524.23-P2|Vill_-_119063498.23-P2
Gm3448	P1	Gm3448_-_15041000.23-P1	GGTATAAACTCACTAGAGGT	1	Gm3448_-_15040996.23-P1	GTATGGTATAAACTCACTAG	2	Gm3448_-_15041000.23-P1|Gm3448_-_15040996.23-P1
Kif13b	P1P2	Kif13b_-_64652573.23-P1P2	GCGGTGGCCGAGGTAGACGG	1	Kif13b_-_64652605.23-P1P2	GACCCCGGCGGTAGCACGAT	2	Kif13b_-_64652573.23-P1P2|Kif13b_-_64652605.23-P1P2
Gcdh	P1P2	Gcdh_+_84893731.23-P1P2	GCGCAAGCACCAGGTATGAA	1	Gcdh_+_84893720.23-P1P2	GGGTATGAAGGGTATGGGGT	2	Gcdh_+_84893731.23-P1P2|Gcdh_+_84893720.23-P1P2
Gabrg2	P1P2	Gabrg2_-_42000246.23-P1P2	GCCCTGGGTAGAGCGATAGC	1	Gabrg2_-_42000231.23-P1P2	GAAACGGCCCATCTTACCCT	2	Gabrg2_-_42000246.23-P1P2|Gabrg2_-_42000231.23-P1P2
Ddrgk1	P1P2	Ddrgk1_+_130664537.23-P1P2	GGGGCCCTGGGTGTATCTGG	1	Ddrgk1_-_130664555.23-P1P2	GCCGCCACCAGATACACCCA	2	Ddrgk1_+_130664537.23-P1P2|Ddrgk1_-_130664555.23-P1P2
Phkg2	P1P2	Phkg2_+_127573604.23-P1P2	Gaaggtggctcggaagaagg	1	Phkg2_+_127573634.23-P1P2	Ggaagaggatagggaagggc	2	Phkg2_+_127573604.23-P1P2|Phkg2_+_127573634.23-P1P2
4933426M11Rik	P1P2	4933426M11Rik_+_80790593.23-P1P2	GTCCTGAGGATGGAACGCGG	1	4933426M11Rik_+_80790645.23-P1P2	GCGGGCGCTGACGAAGGAGG	2	4933426M11Rik_+_80790593.23-P1P2|4933426M11Rik_+_80790645.23-P1P2
5430402E10Rik	ENSMUST00000063127.3	5430402E10Rik_+_77924710.23-ENSMUST00000063127.3	GTTCTGTCTAGTACGAAAGA	1	5430402E10Rik_-_77924995.23-ENSMUST00000063127.3	GTAATGCAATCACAATTAGC	2	5430402E10Rik_+_77924710.23-ENSMUST00000063127.3|5430402E10Rik_-_77924995.23-ENSMUST00000063127.3
Olfr132	ENSMUST00000087128.1	Olfr132_-_38131151.23-ENSMUST00000087128.1	GCTTGTCAGAGAAGCCACGG	1	Olfr132_-_38131167.23-ENSMUST00000087128.1	GCGGAGGATGAAATCACCAT	2	Olfr132_-_38131151.23-ENSMUST00000087128.1|Olfr132_-_38131167.23-ENSMUST00000087128.1
Fam83b	P1P2	Fam83b_+_76567087.23-P1P2	GCTGGGCGCCACCTTCgcag	1	Fam83b_+_76567047.23-P1P2	GcggcggGTGAGTGGAGCAC	2	Fam83b_+_76567087.23-P1P2|Fam83b_+_76567047.23-P1P2
H2afb3	ENSMUST00000122050.1	H2afb3_-_120312622.23-ENSMUST00000122050.1	GTTTATTTGATAACACAATT	1	H2afb3_-_120312627.23-ENSMUST00000122050.1	GTTGATAACACAATTGGGAG	2	H2afb3_-_120312622.23-ENSMUST00000122050.1|H2afb3_-_120312627.23-ENSMUST00000122050.1
Pi4k2b	P1P2	Pi4k2b_+_52741640.23-P1P2	GGCATCACGCCAAACCGCGG	1	Pi4k2b_-_52741633.23-P1P2	GCTGGTGAGGTGGCGTCGGT	2	Pi4k2b_+_52741640.23-P1P2|Pi4k2b_-_52741633.23-P1P2
Asah2	P1P2	Asah2_+_32061359.23-P1P2	GTCAGCCTGAGCAACCTGCA	1	Asah2_+_32061352.23-P1P2	GGAGCAACCTGCAAGGCACA	2	Asah2_+_32061359.23-P1P2|Asah2_+_32061352.23-P1P2
Gm10081	ENSMUST00000081044.3	Gm10081_+_107106441.23-ENSMUST00000081044.3	GTCTAGCACCATGACATGGA	1	Gm10081_+_107106404.23-ENSMUST00000081044.3	GCTACAGTGTCATGGACTAG	2	Gm10081_+_107106441.23-ENSMUST00000081044.3|Gm10081_+_107106404.23-ENSMUST00000081044.3
Gnb4	P1P2	Gnb4_+_32616433.23-P1P2	GTGGCGGCCGGGCTCCAGGT	1	Gnb4_+_32616495.23-P1P2	GGTGTGGTGGAGCCAGCTAG	2	Gnb4_+_32616433.23-P1P2|Gnb4_+_32616495.23-P1P2
Ccl12	P1P2	Ccl12_+_82101922.23-P1P2	GGGTGGTAGCTATGAGCAGG	1	Ccl12_+_82101864.23-P1P2	GACTTCGAAATGAAAGCTAG	2	Ccl12_+_82101922.23-P1P2|Ccl12_+_82101864.23-P1P2
Phf12	P1P2	Phf12_-_77982848.23-P1P2	GGCCGGGACGCAGACGGCAG	1	Phf12_-_77982842.23-P1P2	GGCGGCAGCCGGGACGCAGA	2	Phf12_-_77982848.23-P1P2|Phf12_-_77982842.23-P1P2
Dhrs7c	P1P2	Dhrs7c_+_67798496.23-P1P2	GGCTCAGAGTCTCTCCTCCA	1	Dhrs7c_-_67798477.23-P1P2	GCAGCTGGGAAGGACCTCCC	2	Dhrs7c_+_67798496.23-P1P2|Dhrs7c_-_67798477.23-P1P2
Olfr1440	ENSMUST00000054567.1	Olfr1440_+_12394305.23-ENSMUST00000054567.1	GAAAATCTGAGAATCCCACA	1	Olfr1440_+_12394359.23-ENSMUST00000054567.1	GTGTGGAGAGATAACTTCCC	2	Olfr1440_+_12394305.23-ENSMUST00000054567.1|Olfr1440_+_12394359.23-ENSMUST00000054567.1
Zfp600	ENSMUST00000092750.5	Zfp600_+_146157717.23-ENSMUST00000092750.5	GATATCAATGAAGTCATGGT	1	Zfp600_+_146157800.23-ENSMUST00000092750.5	GCATCACAGCACAGCATGGT	2	Zfp600_+_146157717.23-ENSMUST00000092750.5|Zfp600_+_146157800.23-ENSMUST00000092750.5
Nek5	P1P2	Nek5_+_22125033.23-P1P2	GCTGCGTCTGGGAGGCTTAG	1	Nek5_+_22125044.23-P1P2	GTGGCCCTGCCCCTGCGTCT	2	Nek5_+_22125033.23-P1P2|Nek5_+_22125044.23-P1P2
Zfp518b	P1P2	Zfp518b_-_38684716.23-P1P2	GGCACGGTCCCAGATCCCAG	1	Zfp518b_+_38684770.23-P1P2	GCCCGGGTAGGGACCTACAG	2	Zfp518b_-_38684716.23-P1P2|Zfp518b_+_38684770.23-P1P2
Tmem151a	P1	Tmem151a_-_5085426.23-P1	GCTCGGGGCATGATAAGCAG	1	Tmem151a_+_5085477.23-P1	GGGCTCCGCGCACTCTTCAG	2	Tmem151a_-_5085426.23-P1|Tmem151a_+_5085477.23-P1
Dalrd3	P1P2	Dalrd3_-_108569935.23-P1P2	GCGACCGGGCGCCTTGGGGT	1	Dalrd3_+_108569950.23-P1P2	GGGCCCTACAGCTGCATTAA	2	Dalrd3_-_108569935.23-P1P2|Dalrd3_+_108569950.23-P1P2
Cntn5	P1P2	Cntn5_-_10904779.23-P1P2	GGATGCAGGCAGGTGCAAGT	1	Cntn5_-_10904689.23-P1P2	GAGCAGAAGGGACCCAGGTG	2	Cntn5_-_10904779.23-P1P2|Cntn5_-_10904689.23-P1P2
1700001C19Rik	P1P2	1700001C19Rik_+_47421857.23-P1P2	GGTGCCCTCCCAAGACACCC	1	1700001C19Rik_-_47421839.23-P1P2	GGGTGAAATGGGACTTCTGG	2	1700001C19Rik_+_47421857.23-P1P2|1700001C19Rik_-_47421839.23-P1P2
Bace1	P1P2	Bace1_-_45838643.23-P1P2	GGCTGGGAGCTGGATTATGG	1	Bace1_+_45838608.23-P1P2	GCTCCCAGCTCCCAGCACCT	2	Bace1_-_45838643.23-P1P2|Bace1_+_45838608.23-P1P2
Fcgr3	P1P2	Fcgr3_-_171059308.23-P1P2	GCAGTGGTGGAAGTAGCCAT	1	Fcgr3_-_171059295.23-P1P2	GGCAGCAGAATTGTCAGTGG	2	Fcgr3_-_171059308.23-P1P2|Fcgr3_-_171059295.23-P1P2
Snrpa1	P1P2	Snrpa1_-_66060585.23-P1P2	GAGGCGCAGGCTGGTGTCGG	1	Snrpa1_-_66060613.23-P1P2	GTCCGCGGGCTGCGACAGGA	2	Snrpa1_-_66060585.23-P1P2|Snrpa1_-_66060613.23-P1P2
Kbtbd2	P1P2	Kbtbd2_+_56797708.23-P1P2	GCCGGTGGGGCAGAGGAAAA	1	Kbtbd2_+_56797463.23-P1P2	GGCGGTGAGCTGGGCGACCG	2	Kbtbd2_+_56797708.23-P1P2|Kbtbd2_+_56797463.23-P1P2
Lenep	P1P2	Lenep_-_89402602.23-P1P2	GGGGCATCTCTGAGAGAGAA	1	Lenep_-_89402583.23-P1P2	GTGGAGGCCAGTGCCTCGAA	2	Lenep_-_89402602.23-P1P2|Lenep_-_89402583.23-P1P2
Prrc2a	P1P2	Prrc2a_+_35164846.23-P1P2	GCCAGCCGCGGAGTGAGCGA	1	Prrc2a_-_35164863.23-P1P2	GGTCTCCCTCGCTCACTCCG	2	Prrc2a_+_35164846.23-P1P2|Prrc2a_-_35164863.23-P1P2
Mrps7	P1P2	Mrps7_+_115604184.23-P1P2	GCCAGCCCGGACCAGCGAAG	1	Mrps7_+_115604167.23-P1P2	GAGCGGAGCGCGCAGCGCGG	2	Mrps7_+_115604184.23-P1P2|Mrps7_+_115604167.23-P1P2
9630033F20Rik	P1P2	9630033F20Rik_+_127109487.23-P1P2	GCTGCTGCAGAGCCGGGTCG	1	9630033F20Rik_+_127109521.23-P1P2	GGCAAAGTGGTCCCAGAGTC	2	9630033F20Rik_+_127109487.23-P1P2|9630033F20Rik_+_127109521.23-P1P2
Cep68	P1P2	Cep68_+_20249183.23-P1P2	GCGCGGCCTGGAGGGCACAA	1	Cep68_-_20249363.23-P1P2	GGTAGCTGGGCCAGGGTCCC	2	Cep68_+_20249183.23-P1P2|Cep68_-_20249363.23-P1P2
Hmgn5	P1P2	Hmgn5_+_109013327.23-P1P2	GAGTCGCTCGCGGAGCGGTC	1	Hmgn5_+_109013332.23-P1P2	GAACTCAGTCGCTCGCGGAG	2	Hmgn5_+_109013327.23-P1P2|Hmgn5_+_109013332.23-P1P2
Slc28a3	P1P2	Slc28a3_+_58610611.23-P1P2	GGAGAGCCTAGCAGAGCCGT	1	Slc28a3_+_58610644.23-P1P2	GCGCTGTTGTGAGAGAAGTA	2	Slc28a3_+_58610611.23-P1P2|Slc28a3_+_58610644.23-P1P2
Tcl1b2	ENSMUST00000081379.6	Tcl1b2_+_105147124.23-ENSMUST00000081379.6	GTGTGGAGATCAGAACTTGT	1	Tcl1b2_+_105147110.23-ENSMUST00000081379.6	GCTTGTGGGAGTAGCCTCGG	2	Tcl1b2_+_105147124.23-ENSMUST00000081379.6|Tcl1b2_+_105147110.23-ENSMUST00000081379.6
Opn5	ENSMUST00000068355.6	Opn5_-_42611289.23-ENSMUST00000068355.6	GAGGCGCTCATCCTGAGGTA	1	Opn5_+_42611073.23-ENSMUST00000068355.6	GAGTACGTGGGTATTAGCAG	2	Opn5_-_42611289.23-ENSMUST00000068355.6|Opn5_+_42611073.23-ENSMUST00000068355.6
Hpgd	P1P2	Hpgd_-_56294632.23-P1P2	GGACCCGCCATGCACGTGAA	1	Hpgd_-_56294671.23-P1P2	GCCGGCGCGGCACAGGGCAT	2	Hpgd_-_56294632.23-P1P2|Hpgd_-_56294671.23-P1P2
Rnf152	P1P2	Rnf152_-_105356634.23-P1P2	GCCAGGCACCGGACACTGAG	1	Rnf152_+_105356651.23-P1P2	GTTCAGTGCTTGGGTCTCTG	2	Rnf152_-_105356634.23-P1P2|Rnf152_+_105356651.23-P1P2
Akr1d1	P1P2	Akr1d1_+_37530298.23-P1P2	GAGGTTCCAAGCCCAATGAG	1	Akr1d1_+_37530267.23-P1P2	GCCCATCACTTAGGGATATT	2	Akr1d1_+_37530298.23-P1P2|Akr1d1_+_37530267.23-P1P2
Zfp263	P1P2	Zfp263_+_3744155.23-P1P2	GAACTTAAGTCGCAGGGCCC	1	Zfp263_-_3744112.23-P1P2	GGGAAGTCCGTCCTGACTAG	2	Zfp263_+_3744155.23-P1P2|Zfp263_-_3744112.23-P1P2
Olfr497	ENSMUST00000076406.1	Olfr497_-_108422904.23-ENSMUST00000076406.1	GGAGCCTGGCTGATTTCTTT	1	Olfr497_+_108422835.23-ENSMUST00000076406.1	GAATGGTATTTCTCTCAATC	2	Olfr497_-_108422904.23-ENSMUST00000076406.1|Olfr497_+_108422835.23-ENSMUST00000076406.1
Dand5	P1P2	Dand5_+_84832222.23-P1P2	GTGCGCGGCGGAAACACCGG	1	Dand5_+_84832225.23-P1P2	GGCCTGCGCGGCGGAAACAC	2	Dand5_+_84832222.23-P1P2|Dand5_+_84832225.23-P1P2
Plagl1	P1P2	Plagl1_-_13090866.23-P1P2	GGGCAGGCGGGAGAACGCTC	1	Plagl1_-_13090909.23-P1P2	GGGCTCGCGGCTATCGGGAC	2	Plagl1_-_13090866.23-P1P2|Plagl1_-_13090909.23-P1P2
Ly6g6c	P1P2	Ly6g6c_+_35067420.23-P1P2	GGAGACCCAGCAGTAGAGTA	1	Ly6g6c_+_35067387.23-P1P2	GAGCAACAGGAGGTGTTTCA	2	Ly6g6c_+_35067420.23-P1P2|Ly6g6c_+_35067387.23-P1P2
Tcta	P1P2	Tcta_+_108305940.23-P1P2	GGTGGGGCGCTGGCCAGTCA	1	Tcta_+_108305937.23-P1P2	GGGGCGCTGGCCAGTCATGG	2	Tcta_+_108305940.23-P1P2|Tcta_+_108305937.23-P1P2
Tmem50b	P1P2	Tmem50b_-_91597634.23-P1P2	GGCAGGAGCAGGGACGTCGA	1	Tmem50b_+_91597660.23-P1P2	GTCCCGGACTGAGGTTGATC	2	Tmem50b_-_91597634.23-P1P2|Tmem50b_+_91597660.23-P1P2
Ralgds	P1	Ralgds_+_28533502.23-P1	Gcggcgggccgcgagacccg	1	Ralgds_+_28533711.23-P1	GCTCCAGGCGCGGCAGATCA	2	Ralgds_+_28533502.23-P1|Ralgds_+_28533711.23-P1
Ebi3	P1P2	Ebi3_+_55952878.23-P1P2	GGGCCCAGAGGGCAAGTGAC	1	Ebi3_+_55952728.23-P1P2	GCTCAGTTGTCCAGTGTATG	2	Ebi3_+_55952878.23-P1P2|Ebi3_+_55952728.23-P1P2
Extl3	P1P2	Extl3_+_65098020.23-P1P2	GACTTTCACGCAGGCAACGG	1	Extl3_+_65098056.23-P1P2	GGCGCAGCCGGCGGCCAGAG	2	Extl3_+_65098020.23-P1P2|Extl3_+_65098056.23-P1P2
Hscb	P1P2	Hscb_+_110839721.23-P1P2	GCGAGCGGCCGTCCCAATGT	1	Hscb_-_110839731.23-P1P2	GGGCTCCGCATCCCCACATT	2	Hscb_+_110839721.23-P1P2|Hscb_-_110839731.23-P1P2
Lce3d	ENSMUST00000059053.9	Lce3d_+_92957389.23-ENSMUST00000059053.9	GGTCTGTGTAGAAGAAGCTG	1	Lce3d_+_92957592.23-ENSMUST00000059053.9	GGTTCCTGATGTACCCACAG	2	Lce3d_+_92957389.23-ENSMUST00000059053.9|Lce3d_+_92957592.23-ENSMUST00000059053.9
Dsg3	P1P2	Dsg3_-_20510258.23-P1P2	GGGCCACCAGGAGAGTCCTG	1	Dsg3_+_20510300.23-P1P2	GCCTGGGTGTCTGTATATCT	2	Dsg3_-_20510258.23-P1P2|Dsg3_+_20510300.23-P1P2
Olfr641	ENSMUST00000098183.1	Olfr641_+_104039847.23-ENSMUST00000098183.1	GGTGGAGGCTCTCCAGACCA	1	Olfr641_+_104039835.23-ENSMUST00000098183.1	GCAGACCAGGGATACCAGTC	2	Olfr641_+_104039847.23-ENSMUST00000098183.1|Olfr641_+_104039835.23-ENSMUST00000098183.1
Olfr788	ENSMUST00000056961.3	Olfr788_+_129472722.23-ENSMUST00000056961.3	GGTCATCAGAAAGGCCTAAG	1	Olfr788_+_129472743.23-ENSMUST00000056961.3	GAATCACAATCTGAAGGTCA	2	Olfr788_+_129472722.23-ENSMUST00000056961.3|Olfr788_+_129472743.23-ENSMUST00000056961.3
Vmn1r148	ENSMUST00000177774.1	Vmn1r148_+_22412325.23-ENSMUST00000177774.1	GCTGCAGAGCACAGCTTCTA	1	Vmn1r148_+_22412242.23-ENSMUST00000177774.1	GAATGCAATGAAATTCAGAA	2	Vmn1r148_+_22412325.23-ENSMUST00000177774.1|Vmn1r148_+_22412242.23-ENSMUST00000177774.1
Lyrm5	P1P2	Lyrm5_-_145211204.23-P1P2	GGCCGCAAAGCGCTGGAGTG	1	Lyrm5_+_145211257.23-P1P2	GGCCCGGAAGCCCTCGCCTA	2	Lyrm5_-_145211204.23-P1P2|Lyrm5_+_145211257.23-P1P2
Luc7l3	P1P2	Luc7l3_+_94321909.23-P1P2	GTGTCTTCTCGGCTCCTCTC	1	Luc7l3_+_94321873.23-P1P2	GGCTTGAGAGTGGGCCGAGG	2	Luc7l3_+_94321909.23-P1P2|Luc7l3_+_94321873.23-P1P2
Chmp1a	P1P2	Chmp1a_+_123212728.23-P1P2	GGAAGCCCTCGCGGAGACAG	1	Chmp1a_-_123212754.23-P1P2	GGTCTCCGCGAGGGCTTCCG	2	Chmp1a_+_123212728.23-P1P2|Chmp1a_-_123212754.23-P1P2
Enc1	P1P2	Enc1_-_97241146.23-P1P2	GAGAGCCAGCGGCGCGACGG	1	Enc1_-_97241162.23-P1P2	GCGGAGGCGCTGCAGAGACC	2	Enc1_-_97241146.23-P1P2|Enc1_-_97241162.23-P1P2
Slitrk4	P1P2	Slitrk4_+_64276915.23-P1P2	GCTGCTAAAGGCTGTTCTGT	1	Slitrk4_+_64276899.23-P1P2	GTGTGGGCTTGACCAGCGAG	2	Slitrk4_+_64276915.23-P1P2|Slitrk4_+_64276899.23-P1P2
D6Ertd527e	P1P2	D6Ertd527e_+_87104793.23-P1P2	Gcagggcaggaggttcctag	1	D6Ertd527e_-_87104775.23-P1P2	Gctgtaacaagttcctccgt	2	D6Ertd527e_+_87104793.23-P1P2|D6Ertd527e_-_87104775.23-P1P2
Iqcf4	P1P2	Iqcf4_-_106570940.23-P1P2	GCCCATGGCTGGGGTTACGA	1	Iqcf4_-_106570945.23-P1P2	GGGCTGGGGTTACGATGGAA	2	Iqcf4_-_106570940.23-P1P2|Iqcf4_-_106570945.23-P1P2
Extl2	P1P2	Extl2_-_116008407.23-P1P2	GCCTAGGTTATCAATTGGAC	1	Extl2_-_116008391.23-P1P2	GTGCAGGCGGCGCATTTCCT	2	Extl2_-_116008407.23-P1P2|Extl2_-_116008391.23-P1P2
Abcc9	P1P2	Abcc9_-_142702231.23-P1P2	GAGGAGCTCACGCACTCCAT	1	Abcc9_+_142702244.23-P1P2	GCGCCGGCTGCTGACCCGGG	2	Abcc9_-_142702231.23-P1P2|Abcc9_+_142702244.23-P1P2
Gnb1	P1P2	Gnb1_-_155491387.23-P1P2	GGCCGCCGCGCCCATCCTGA	1	Gnb1_+_155491375.23-P1P2	GCGCCTCCAGCCATCAGGAT	2	Gnb1_-_155491387.23-P1P2|Gnb1_+_155491375.23-P1P2
Reep5	P1P2	Reep5_-_34373310.23-P1P2	GCGGTCGAACCTCTCCCTCA	1	Reep5_-_34373387.23-P1P2	GCGCGGAACCCAGCTGAccg	2	Reep5_-_34373310.23-P1P2|Reep5_-_34373387.23-P1P2
Ppm1m	P1P2	Ppm1m_-_106199163.23-P1P2	GTGGAAGTGGACCCCCGGGT	1	Ppm1m_-_106199169.23-P1P2	GTGGACCCCCGGGTAGGAAG	2	Ppm1m_-_106199163.23-P1P2|Ppm1m_-_106199169.23-P1P2
H2-M2	P1P2	H2-M2_-_37483502.23-P1P2	GCAGCAGGTAGAGAGTGAAG	1	H2-M2_-_37483320.23-P1P2	GTCCAGGGCAGGTGGTAGAA	2	H2-M2_-_37483502.23-P1P2|H2-M2_-_37483320.23-P1P2
Rbp7	P1P2	Rbp7_+_149454930.23-P1P2	GCCATGCCAGCAGACCTCAG	1	Rbp7_-_149454990.23-P1P2	GGCCAAAGCCCAAGAGTCAC	2	Rbp7_+_149454930.23-P1P2|Rbp7_-_149454990.23-P1P2
Acap3	P1P2	Acap3_+_155892650.23-P1P2	GCGCGAGGTGATCAGCACAG	1	Acap3_-_155892333.23-P1P2	GGGCGCCACAGACGGTCCAC	2	Acap3_+_155892650.23-P1P2|Acap3_-_155892333.23-P1P2
Gvin1	ENSMUST00000006667.4,ENSMUST00000183409.1	Gvin1_-_106215282.23-ENSMUST00000006667.4,ENSMUST00000183409.1	GTGCTCTAGAGAGTAATTGG	1	Gvin1_+_106215068.23-ENSMUST00000006667.4,ENSMUST00000183409.1	GTCCAGGTTGCTAGAACCTA	2	Gvin1_-_106215282.23-ENSMUST00000006667.4,ENSMUST00000183409.1|Gvin1_+_106215068.23-ENSMUST00000006667.4,ENSMUST00000183409.1
Tex2	P1P2	Tex2_+_106612895.23-P1P2	GCGCGGCGGCCGCCAAGTAC	1	Tex2_+_106612874.23-P1P2	GGCGCCGGTGTAGTAGGATG	2	Tex2_+_106612895.23-P1P2|Tex2_+_106612874.23-P1P2
Vmn2r6	ENSMUST00000176481.1	Vmn2r6_+_64564836.23-ENSMUST00000176481.1	GCTCCTTGTGAAAAAAATGG	1	Vmn2r6_+_64564839.23-ENSMUST00000176481.1	GCAGCTCCTTGTGAAAAAAA	2	Vmn2r6_+_64564836.23-ENSMUST00000176481.1|Vmn2r6_+_64564839.23-ENSMUST00000176481.1
Pstpip1	P1P2	Pstpip1_+_56090095.23-P1P2	GTCGCCAGCCCCACTGATGG	1	Pstpip1_-_56090109.23-P1P2	GGCGTCCTCCTCCATCAGTG	2	Pstpip1_+_56090095.23-P1P2|Pstpip1_-_56090109.23-P1P2
Crebrf	P1P2	Crebrf_+_26715768.23-P1P2	GACCGCTCGGCATTCACCTG	1	Crebrf_+_26715726.23-P1P2	GGGATCCGGCCGCGCTTACG	2	Crebrf_+_26715768.23-P1P2|Crebrf_+_26715726.23-P1P2
Focad	P1P2	Focad_-_88094646.23-P1P2	GCGTGGGACACGTCAGGCAC	1	Focad_-_88094827.23-P1P2	GCCCGCGGCGGAGCATGTGG	2	Focad_-_88094646.23-P1P2|Focad_-_88094827.23-P1P2
Tmem255a	P1P2	Tmem255a_+_38252391.23-P1P2	GCGCTAGGGAAGACCGAGAG	1	Tmem255a_+_38252405.23-P1P2	GTCAGTCCCTCTCAGCGCTA	2	Tmem255a_+_38252391.23-P1P2|Tmem255a_+_38252405.23-P1P2
Paip1	P1P2	Paip1_-_119428937.23-P1P2	GCGGCAGCCGAAGGGAGCCG	1	Paip1_+_119429008.23-P1P2	GCCTCACTCAGGCCTCATGG	2	Paip1_-_119428937.23-P1P2|Paip1_+_119429008.23-P1P2
Cpsf2	P1P2	Cpsf2_-_101976015.23-P1P2	GGATGGCGGCCACCACACAG	1	Cpsf2_+_101976036.23-P1P2	GAGAGCTAGCGCGCGCTCAG	2	Cpsf2_-_101976015.23-P1P2|Cpsf2_+_101976036.23-P1P2
Rnaseh1	P1P2	Rnaseh1_-_28649667.23-P1P2	GGGCTCGCGGGCAGCAATGT	1	Rnaseh1_-_28649655.23-P1P2	GTCGCCGGCGGGAGGCTCGC	2	Rnaseh1_-_28649667.23-P1P2|Rnaseh1_-_28649655.23-P1P2
Fam115a	P2	Fam115a_-_42693007.23-P2	GCTGAACAGGGGATTCTCGG	1	Fam115a_-_42692985.23-P2	GTTCTAGGACCGCACCAGGA	2	Fam115a_-_42693007.23-P2|Fam115a_-_42692985.23-P2
Taf12	P1P2	Taf12_-_132274421.23-P1P2	GGAGGGCCGCGCAGTCGGAC	1	Taf12_-_132274467.23-P1P2	GGGCAGTCTCCGCATATCAT	2	Taf12_-_132274421.23-P1P2|Taf12_-_132274467.23-P1P2
Fam20b	P1P2	Fam20b_+_156718842.23-P1P2	GTGAGTGGCGCGGTTGGAGA	1	Fam20b_+_156718679.23-P1P2	GTGCTAAGGACGGTCCCCAG	2	Fam20b_+_156718842.23-P1P2|Fam20b_+_156718679.23-P1P2
Gm44	ENSMUST00000172155.1	Gm44_-_90892177.23-ENSMUST00000172155.1	GAAGAGTAAGCTAAATGCCA	1	Gm44_+_90892185.23-ENSMUST00000172155.1	GAGCATAATTTCTGGCACGG	2	Gm44_-_90892177.23-ENSMUST00000172155.1|Gm44_+_90892185.23-ENSMUST00000172155.1
Defb42	P1P2	Defb42_-_63046983.23-P1P2	GGCCCTCAAGAGACCCAGAT	1	Defb42_+_63047174.23-P1P2	GGGCAATTCATGGCTGGGAG	2	Defb42_-_63046983.23-P1P2|Defb42_+_63047174.23-P1P2
Zmynd8	P2	Zmynd8_-_165858131.23-P2	GGACAGTAGCAAGCTCCCGG	1	Zmynd8_-_165858128.23-P2	GGAGGACAGTAGCAAGCTCC	2	Zmynd8_-_165858131.23-P2|Zmynd8_-_165858128.23-P2
Ptbp3	P1P2	Ptbp3_-_59549244.23-P1P2	GGCTCCGGGAAACCAGCGAG	1	Ptbp3_-_59549274.23-P1P2	GCGCAGCTCCGGCCGGTCAG	2	Ptbp3_-_59549244.23-P1P2|Ptbp3_-_59549274.23-P1P2
Rnf19b	P1P2	Rnf19b_-_129058169.23-P1P2	GTCTGGGAGGACTGCCGAgg	1	Rnf19b_-_129058175.23-P1P2	GAGGACTGCCGAggcggtgg	2	Rnf19b_-_129058169.23-P1P2|Rnf19b_-_129058175.23-P1P2
Gdf9	P2	Gdf9_-_53431076.23-P2	GAGTAGTGAACGCACGGGAG	1	Gdf9_-_53431071.23-P2	GCGGTAAGTAGTGAACGCAC	2	Gdf9_-_53431076.23-P2|Gdf9_-_53431071.23-P2
B3gat3	P1P2	B3gat3_-_8920444.23-P1P2	GCGTTCCCGGGAACTAGTAA	1	B3gat3_+_8920625.23-P1P2	GGAGCTGCACCAGAGCGTAG	2	B3gat3_-_8920444.23-P1P2|B3gat3_+_8920625.23-P1P2
Gtsf1l	P1P2	Gtsf1l_-_163087804.23-P1P2	GGAAACAGTAGCTTCCAAGG	1	Gtsf1l_-_163087417.23-P1P2	GCTTTCTGATGGGAACCACG	2	Gtsf1l_-_163087804.23-P1P2|Gtsf1l_-_163087417.23-P1P2
Tgfb1i1	P1P2	Tgfb1i1_-_128247008.23-P1P2	GGCACCGCCATGGAGGACCT	1	Tgfb1i1_+_128247022.23-P1P2	GGGAAGGATGAGAGGCTAGG	2	Tgfb1i1_-_128247008.23-P1P2|Tgfb1i1_+_128247022.23-P1P2
Hmx1	P1P2	Hmx1_-_35388871.23-P1P2	GACCGCTCGGAGAAACGCGA	1	Hmx1_-_35388889.23-P1P2	GAGGGAGGCTGCTGCGGGAA	2	Hmx1_-_35388871.23-P1P2|Hmx1_-_35388889.23-P1P2
Hdhd3	P1P2	Hdhd3_+_62502195.23-P1P2	GATCGCCTACATAGAGCCGG	1	Hdhd3_-_62502201.23-P1P2	GGACGCAGCGGCTGCTCCAC	2	Hdhd3_+_62502195.23-P1P2|Hdhd3_-_62502201.23-P1P2
Zfp60	P1P2	Zfp60_-_27731488.23-P1P2	GAGAGTAAGGCCGGGAGTCC	1	Zfp60_-_27731480.23-P1P2	GGTCTCTGCAGAGTAAGGCC	2	Zfp60_-_27731488.23-P1P2|Zfp60_-_27731480.23-P1P2
Sdr16c6	P1P2	Sdr16c6_-_4077476.23-P1P2	Gcaagaaaggagttaaaggt	1	Sdr16c6_-_4077463.23-P1P2	Gcatgaagggaagtcaagaa	2	Sdr16c6_-_4077476.23-P1P2|Sdr16c6_-_4077463.23-P1P2
Rtp4	P1P2	Rtp4_-_23609964.23-P1P2	GTGAGCTGCTGAGTAACCCG	1	Rtp4_+_23609979.23-P1P2	GCGGGGAACAGCATTCTCAG	2	Rtp4_-_23609964.23-P1P2|Rtp4_+_23609979.23-P1P2
Lrrc3b	P1P2	Lrrc3b_-_15438947.23-P1P2	GGGAGACAAAGATGCGAGGG	1	Lrrc3b_+_15438962.23-P1P2	GGACTGAGCCGCCTGCACGT	2	Lrrc3b_-_15438947.23-P1P2|Lrrc3b_+_15438962.23-P1P2
Sncg	P1P2	Sncg_-_34374619.23-P1P2	GACCTGGCTGCTGCAAGCTA	1	Sncg_-_34374624.23-P1P2	GGCTGCTGCAAGCTATGGAC	2	Sncg_-_34374619.23-P1P2|Sncg_-_34374624.23-P1P2
Oxct2a	P1P2	Oxct2a_+_123323579.23-P1P2	GCCGTGGCCGTGGACGATGG	1	Oxct2a_+_123323582.23-P1P2	GGCCCCGTGGCCGTGGACGA	2	Oxct2a_+_123323579.23-P1P2|Oxct2a_+_123323582.23-P1P2
Setd3	P1P2	Setd3_+_108179297.23-P1P2	GgAGCCGGGTTGGGCCTAGG	1	Setd3_+_108178971.23-P1P2	GGGCAGGCCCGGTCCCTGAG	2	Setd3_+_108179297.23-P1P2|Setd3_+_108178971.23-P1P2
Akr1b10	P1P2	Akr1b10_+_34384348.23-P1P2	GCCGGTAAGGAGCGTCACGA	1	Akr1b10_-_34384269.23-P1P2	GGCCTGTCTCCTCAAGGACA	2	Akr1b10_+_34384348.23-P1P2|Akr1b10_-_34384269.23-P1P2
Epsti1	P1P2	Epsti1_+_77904428.23-P1P2	GGAGGGACGGATGCTGGTAA	1	Epsti1_+_77904416.23-P1P2	GCTGGTAAGGGCTTCTAAGG	2	Epsti1_+_77904428.23-P1P2|Epsti1_+_77904416.23-P1P2
Ndc80	P1P2	Ndc80_+_71526799.23-P1P2	GCGCCTTGGGTTGACGGAAG	1	Ndc80_+_71526785.23-P1P2	GGGAAGCGGACGCTCTGGTT	2	Ndc80_+_71526799.23-P1P2|Ndc80_+_71526785.23-P1P2
Muc19	ENSMUST00000178108.1	Muc19_+_91870509.23-ENSMUST00000178108.1	GGTAAATTACCTGAAGTACT	1	Muc19_+_91870485.23-ENSMUST00000178108.1	GTGGGTGTTCTAGTCGTAGT	2	Muc19_+_91870509.23-ENSMUST00000178108.1|Muc19_+_91870485.23-ENSMUST00000178108.1
Olfr775	ENSMUST00000097163.2	Olfr775_-_129250776.23-ENSMUST00000097163.2	GTTTCTGTCCCTAGATTTTT	1	Olfr775_+_129250999.23-ENSMUST00000097163.2	GGTGGATAAGCATGATTAAA	2	Olfr775_-_129250776.23-ENSMUST00000097163.2|Olfr775_+_129250999.23-ENSMUST00000097163.2
Ccm2l	P1P2	Ccm2l_-_153066094.23-P1P2	GTCTCTGAAGGTGGATACAG	1	Ccm2l_-_153065993.23-P1P2	GAGGAGGGTGGCAGGACAAG	2	Ccm2l_-_153066094.23-P1P2|Ccm2l_-_153065993.23-P1P2
Acvr1	P1P2	Acvr1_-_58567113.23-P1P2	Ggggcggaggaaacttgcgg	1	Acvr1_+_58566563.23-P1P2	GTGGCTGCCGGTGGGATCCG	2	Acvr1_-_58567113.23-P1P2|Acvr1_+_58566563.23-P1P2
Anxa2	P1P2	Anxa2_+_69453734.23-P1P2	GGGCCGCGCCCCACTTACCT	1	Anxa2_-_69453712.23-P1P2	GGGCTGCTCCGCTTCAAGGG	2	Anxa2_+_69453734.23-P1P2|Anxa2_-_69453712.23-P1P2
Olfr417	ENSMUST00000085862.1	Olfr417_+_174369004.23-ENSMUST00000085862.1	GAGTGACCATATACAGGCAA	1	Olfr417_+_174368985.23-ENSMUST00000085862.1	GAGGAAGACCACAAAGAGCC	2	Olfr417_+_174369004.23-ENSMUST00000085862.1|Olfr417_+_174368985.23-ENSMUST00000085862.1
Ccdc50	P1P2	Ccdc50_-_27389141.23-P1P2	GGCCGGGCGTGAAGGAAGGT	1	Ccdc50_-_27389091.23-P1P2	GCGAGGCCCAGCGGCCGCCA	2	Ccdc50_-_27389141.23-P1P2|Ccdc50_-_27389091.23-P1P2
3110021N24Rik	ENSMUST00000178992.1	3110021N24Rik_-_108719707.23-ENSMUST00000178992.1	GGTCCTGTCTCAGAAACTGT	1	3110021N24Rik_+_108719662.23-ENSMUST00000178992.1	GCAGCTGAAAGTCTTCTCTC	2	3110021N24Rik_-_108719707.23-ENSMUST00000178992.1|3110021N24Rik_+_108719662.23-ENSMUST00000178992.1
Pprc1	P1P2	Pprc1_-_46056596.23-P1P2	GTGTTCAGGGGCCAAGATGG	1	Pprc1_+_46056632.23-P1P2	GCAGGACCCGGGCCCCCAGT	2	Pprc1_-_46056596.23-P1P2|Pprc1_+_46056632.23-P1P2
Sdhd	P1P2	Sdhd_+_50603782.23-P1P2	GGCCCTCGAAAGCGACATGG	1	Sdhd_+_50603736.23-P1P2	GGCAGTGGCCAAGGAGCTCG	2	Sdhd_+_50603782.23-P1P2|Sdhd_+_50603736.23-P1P2
Nfatc4	P1P2	Nfatc4_-_55825042.23-P1P2	GGCTCCGGCCGGATCCATGG	1	Nfatc4_-_55825063.23-P1P2	GGCCGCAAGCTGCGAGGATG	2	Nfatc4_-_55825042.23-P1P2|Nfatc4_-_55825063.23-P1P2
Ptx3	P1P2	Ptx3_+_66219969.23-P1P2	GGCCCGGGAGAGATAGTGTG	1	Ptx3_-_66220000.23-P1P2	GTCTCTCCCGGGCTCAAACT	2	Ptx3_+_66219969.23-P1P2|Ptx3_-_66220000.23-P1P2
Adck4	P1	Adck4_-_27233072.23-P1	GACCTGGAGCCTAAACCTGG	1	Adck4_-_27233056.23-P1	GGCCCAGCGGGTGCTAGACC	2	Adck4_-_27233072.23-P1|Adck4_-_27233056.23-P1
Olfr293	ENSMUST00000081474.1	Olfr293_+_86663691.23-ENSMUST00000081474.1	GATGAACTCGGTAACCAAGG	1	Olfr293_+_86663676.23-ENSMUST00000081474.1	GAAGGTGGAATTGGTAACTA	2	Olfr293_+_86663691.23-ENSMUST00000081474.1|Olfr293_+_86663676.23-ENSMUST00000081474.1
Trim30d	P1P2	Trim30d_+_104507786.23-P1P2	GATCATCAGGACTTAGACTC	1	Trim30d_+_104507627.23-P1P2	GAAAGCAGGAGGGTGTTGGA	2	Trim30d_+_104507786.23-P1P2|Trim30d_+_104507627.23-P1P2
1700084C01Rik	P1P2	1700084C01Rik_+_169929014.23-P1P2	GGCTTCACCCAAAAATACAG	1	1700084C01Rik_-_169929029.23-P1P2	GTGCTACCCCCTGTATTTTT	2	1700084C01Rik_+_169929014.23-P1P2|1700084C01Rik_-_169929029.23-P1P2
Scoc	P1	Scoc_+_83442415.23-P1	GGCGCTTCAGACgcaaggtg	1	Scoc_+_83442226.23-P1	GCTCAGTGGGAAGAGCCCGG	2	Scoc_+_83442415.23-P1|Scoc_+_83442226.23-P1
Chrdl2	P1P2	Chrdl2_-_100006094.23-P1P2	GGCGCCCGAGGCGTGCACAG	1	Chrdl2_+_100006116.23-P1P2	GGCGACAAGACCCTCGGTGG	2	Chrdl2_-_100006094.23-P1P2|Chrdl2_+_100006116.23-P1P2
Armc7	P1P2	Armc7_-_115475679.23-P1P2	GTCCGCCCTGAACCAGGAAG	1	Armc7_-_115475698.23-P1P2	GCGGTGCAGGGAGTGTGGTA	2	Armc7_-_115475679.23-P1P2|Armc7_-_115475698.23-P1P2
Mkrn3	P1P2	Mkrn3_-_62420119.23-P1P2	GTGAATTGCGGAGCTGGAGA	1	Mkrn3_+_62419772.23-P1P2	GCTGGTCCGGAGCGCAACAG	2	Mkrn3_-_62420119.23-P1P2|Mkrn3_+_62419772.23-P1P2
Gabra4	P1P2	Gabra4_+_71657850.23-P1P2	GCTGCCCAGGGCATCTCGAG	1	Gabra4_-_71657885.23-P1P2	GCTGGGCAGGGTGCGAGGAG	2	Gabra4_+_71657850.23-P1P2|Gabra4_-_71657885.23-P1P2
Abcd4	P1P2	Abcd4_-_84617342.23-P1P2	GACCCGGGATGCAAGCGACG	1	Abcd4_+_84617355.23-P1P2	GTCTGCCCGGGGAGGACACC	2	Abcd4_-_84617342.23-P1P2|Abcd4_+_84617355.23-P1P2
Cul4a	P1P2	Cul4a_-_13105780.23-P1P2	GCGGACGAGGGCCCTCGGAA	1	Cul4a_-_13105761.23-P1P2	GgCGTCCGGCCCAGCCATGG	2	Cul4a_-_13105780.23-P1P2|Cul4a_-_13105761.23-P1P2
Aldh1l2	P1P2	Aldh1l2_-_83534069.23-P1P2	GCGGGAGTGGGTAGGTACCA	1	Aldh1l2_-_83534047.23-P1P2	GCGAGCGATTGCCAGGCGGG	2	Aldh1l2_-_83534069.23-P1P2|Aldh1l2_-_83534047.23-P1P2
Trmt1l	P1P2	Trmt1l_+_151428739.23-P1P2	GGCGTGCCACAGACAAACGG	1	Trmt1l_-_151428680.23-P1P2	GGGAAGGGGAAGCCGGCGAA	2	Trmt1l_+_151428739.23-P1P2|Trmt1l_-_151428680.23-P1P2
Olfr799	ENSMUST00000071126.2	Olfr799_+_129647397.23-ENSMUST00000071126.2	GTGACTGATACAAGCAGCAT	1	Olfr799_+_129647391.23-ENSMUST00000071126.2	GATACAAGCAGCATAGGCAA	2	Olfr799_+_129647397.23-ENSMUST00000071126.2|Olfr799_+_129647391.23-ENSMUST00000071126.2
Mtx1	P1P2	Mtx1_+_89213856.23-P1P2	GGAGCTGTTCTGCTGGTCAG	1	Mtx1_+_89213889.23-P1P2	GGGTCAGAGAGCGTACAAGA	2	Mtx1_+_89213856.23-P1P2|Mtx1_+_89213889.23-P1P2
2310039H08Rik	P1P2	2310039H08Rik_-_46772864.23-P1P2	GGCGGTGTCTCCAGTCCGAG	1	2310039H08Rik_+_46772852.23-P1P2	GGCCAGTGCACCGCTCGGAC	2	2310039H08Rik_-_46772864.23-P1P2|2310039H08Rik_+_46772852.23-P1P2
Mroh7	ENSMUST00000106770.1	Mroh7_-_106727905.23-ENSMUST00000106770.1	GTGCCTTGTGGAGGCCGTAA	1	Mroh7_+_106727910.23-ENSMUST00000106770.1	GTGGGACAGTATCAAGGGTA	2	Mroh7_-_106727905.23-ENSMUST00000106770.1|Mroh7_+_106727910.23-ENSMUST00000106770.1
Atp8b2	P1	Atp8b2_-_89963292.23-P1	GGGCTCTCCTGAcccccccg	1	Atp8b2_+_89963284.23-P1	GTAgcgggccggggccccgg	2	Atp8b2_-_89963292.23-P1|Atp8b2_+_89963284.23-P1
Cit	P1P2	Cit_-_115845288.23-P1P2	GCGGGAGACTCAGGGCGGAG	1	Cit_-_115845312.23-P1P2	GCGGGGCGAATGTAAGCCGG	2	Cit_-_115845288.23-P1P2|Cit_-_115845312.23-P1P2
Alyref	P1P2	Alyref_+_120598183.23-P1P2	GCCGCGCGGGTGAATCGAGG	1	Alyref_+_120598186.23-P1P2	GCCGCCGCGCGGGTGAATCG	2	Alyref_+_120598183.23-P1P2|Alyref_+_120598186.23-P1P2
6430571L13Rik	P1P2	6430571L13Rik_+_107340667.23-P1P2	GGGCGACAGGTCCCGACTCA	1	6430571L13Rik_-_107340677.23-P1P2	GCGCAAGGCGGACCTTGAGT	2	6430571L13Rik_+_107340667.23-P1P2|6430571L13Rik_-_107340677.23-P1P2
Prl8a2	P1P2	Prl8a2_-_27345675.23-P1P2	GGTAGAACTAGCCTAATGTA	1	Prl8a2_+_27345711.23-P1P2	GTGGCCAGGACTTTCCAAGC	2	Prl8a2_-_27345675.23-P1P2|Prl8a2_+_27345711.23-P1P2
Hephl1	P1P2	Hephl1_+_15112081.23-P1P2	GTGTTTCTGAAGCAGCCGGG	1	Hephl1_-_15112088.23-P1P2	GGGAGAAGGATGCAGCCACC	2	Hephl1_+_15112081.23-P1P2|Hephl1_-_15112088.23-P1P2
Rogdi	P1P2	Rogdi_+_5013503.23-P1P2	GCGGTGCGCGGCTAGGAGGA	1	Rogdi_+_5013491.23-P1P2	GAGGAGGATGGCGACCGCGA	2	Rogdi_+_5013503.23-P1P2|Rogdi_+_5013491.23-P1P2
Adh6b	P1P2	Adh6b_-_138352407.23-P1P2	GTCTCCAACTGGATTAATGT	1	Adh6b_+_138352389.23-P1P2	GCATCCAACATTAATCCAGT	2	Adh6b_-_138352407.23-P1P2|Adh6b_+_138352389.23-P1P2
Dbi	P1P2	Dbi_-_120120957.23-P1P2	GCGCAGTACCTGAGACATAC	1	Dbi_-_120120962.23-P1P2	GTACCTGAGACATACTGGTG	2	Dbi_-_120120957.23-P1P2|Dbi_-_120120962.23-P1P2
Ndufa7	P1P2	Ndufa7_+_33824857.23-P1P2	GGCTAAAGCCAGGCAATCTA	1	Ndufa7_-_33824679.23-P1P2	GGCTGCGGAACTGGGCGTCT	2	Ndufa7_+_33824857.23-P1P2|Ndufa7_-_33824679.23-P1P2
Olfml1	P1P2	Olfml1_-_107567500.23-P1P2	GCTGTGCATGGCCAAGCTGA	1	Olfml1_+_107567467.23-P1P2	GCCATGCACAGACCCTCTCC	2	Olfml1_-_107567500.23-P1P2|Olfml1_+_107567467.23-P1P2
Cwf19l2	P1P2	Cwf19l2_-_3404103.23-P1P2	GTCGACGGCAACAACTATGG	1	Cwf19l2_-_3404100.23-P1P2	GTTTTCGACGGCAACAACTA	2	Cwf19l2_-_3404103.23-P1P2|Cwf19l2_-_3404100.23-P1P2
Olfr1160	ENSMUST00000099839.1	Olfr1160_-_88006563.23-ENSMUST00000099839.1	GTATGAAGGATAACATACAG	1	Olfr1160_+_88006776.23-ENSMUST00000099839.1	GTTCCATTATTATTATACCT	2	Olfr1160_-_88006563.23-ENSMUST00000099839.1|Olfr1160_+_88006776.23-ENSMUST00000099839.1
Zmym1	P1P2	Zmym1_-_127061060.23-P1P2	GCTGGAAAAGCGGGCCTGAG	1	Zmym1_+_127061063.23-P1P2	GGACAGATCAGCCATCCTCG	2	Zmym1_-_127061060.23-P1P2|Zmym1_+_127061063.23-P1P2
Pogk	P1P2	Pogk_+_166409793.23-P1P2	GCTCCCGAGGGGCCGCGCTG	1	Pogk_-_166409752.23-P1P2	GCAAAGGGCGACGAAGGCTG	2	Pogk_+_166409793.23-P1P2|Pogk_-_166409752.23-P1P2
Marcks	P1P2	Marcks_+_37138838.23-P1P2	GACAGTGCGGCTACAAATCT	1	Marcks_-_37138869.23-P1P2	GTAGCCGCACTGTAGACAAG	2	Marcks_+_37138838.23-P1P2|Marcks_-_37138869.23-P1P2
Dusp11	P1P2	Dusp11_-_85961630.23-P1P2	GAAGAGGCCGCGGGATCCAG	1	Dusp11_-_85961604.23-P1P2	GCAAAGTGGCGACTTCAGGG	2	Dusp11_-_85961630.23-P1P2|Dusp11_-_85961604.23-P1P2
Fut2	P1P2	Fut2_-_45666269.23-P1P2	GCGTGGCTCTGCGGACTGGA	1	Fut2_+_45666242.23-P1P2	GAGTCCGCAGAGCCACGCTG	2	Fut2_-_45666269.23-P1P2|Fut2_+_45666242.23-P1P2
Slc41a1	P1P2	Slc41a1_-_131828075.23-P1P2	GCGCGGGCAAGAGGCGATTG	1	Slc41a1_-_131828196.23-P1P2	GGAGCGGCGGCCTCACAGGA	2	Slc41a1_-_131828075.23-P1P2|Slc41a1_-_131828196.23-P1P2
Gprc5c	P1P2	Gprc5c_-_114851900.23-P1P2	GCCTGGAGGTGAGTCGGAGG	1	Gprc5c_-_114851894.23-P1P2	GGCCGAGCCTGGAGGTGAGT	2	Gprc5c_-_114851900.23-P1P2|Gprc5c_-_114851894.23-P1P2
Ugt1a6b	P1P2	Ugt1a6b_-_88103248.23-P1P2	GTCCCTCTTTGGTGGTGGTT	1	Ugt1a6b_-_88103280.23-P1P2	GTTCAGATGCTGGCTGATGG	2	Ugt1a6b_-_88103248.23-P1P2|Ugt1a6b_-_88103280.23-P1P2
1600014C23Rik	P1P2	1600014C23Rik_-_45733666.23-P1P2	GACTCCCAGTGGGTAGACTG	1	1600014C23Rik_+_45733631.23-P1P2	GCTGGGAGTCCCGGAAAGGG	2	1600014C23Rik_-_45733666.23-P1P2|1600014C23Rik_+_45733631.23-P1P2
Tma16	P1P2	Tma16_+_66486480.23-P1P2	GGAAGAAGCGGACTTGAGAG	1	Tma16_-_66486525.23-P1P2	GTAACACACGTGGGCCCCGG	2	Tma16_+_66486480.23-P1P2|Tma16_-_66486525.23-P1P2
Cyp2c38	P1P2	Cyp2c38_+_39463050.23-P1P2	GTGAATAAGGAGGGTTTCTA	1	Cyp2c38_+_39463059.23-P1P2	GTCAACTGTATGAATAAGGA	2	Cyp2c38_+_39463050.23-P1P2|Cyp2c38_+_39463059.23-P1P2
Suds3	P1P2	Suds3_-_117115931.23-P1P2	GCGGGCACCGGGACTCCCCT	1	Suds3_+_117115874.23-P1P2	GGCGAGGTTGCGGGGCTCCG	2	Suds3_-_117115931.23-P1P2|Suds3_+_117115874.23-P1P2
Gstm5	P1P2	Gstm5_+_107895907.23-P1P2	GGGATACAGCGATGGACTGT	1	Gstm5_+_107895915.23-P1P2	GCCCTTCGGGGATACAGCGA	2	Gstm5_+_107895907.23-P1P2|Gstm5_+_107895915.23-P1P2
Sbno1	P1P2	Sbno1_-_124425525.23-P1P2	GCCGGAGGCGACAGGAgcgg	1	Sbno1_-_124425510.23-P1P2	GCGAACGGGTGAGGAGCCGG	2	Sbno1_-_124425525.23-P1P2|Sbno1_-_124425510.23-P1P2
Vmn1r47	ENSMUST00000074881.1	Vmn1r47_+_90022356.23-ENSMUST00000074881.1	GTTATTCATGGTCAAATTGA	1	Vmn1r47_+_90022333.23-ENSMUST00000074881.1	GGGCAGTGATGGATATAAAG	2	Vmn1r47_+_90022356.23-ENSMUST00000074881.1|Vmn1r47_+_90022333.23-ENSMUST00000074881.1
Rpap1	P1P2	Rpap1_+_119787496.23-P1P2	GGTCCGCACGGCCAAGATGG	1	Rpap1_+_119787469.23-P1P2	GAGGCGGGTTTGGTTGGAGT	2	Rpap1_+_119787496.23-P1P2|Rpap1_+_119787469.23-P1P2
Moap1	P2	Moap1_+_102743640.23-P2	GAGCTTCGCGCCGCCTCCAG	1	Moap1_-_102743649.23-P2	GAACAGACAACCGCCTCTGG	2	Moap1_+_102743640.23-P2|Moap1_-_102743649.23-P2
Grem2	P1P2	Grem2_-_174921766.23-P1P2	GGCCCAGTGGAGCGCACAGA	1	Grem2_+_174921598.23-P1P2	GGAGACACACAAGGGAACCG	2	Grem2_-_174921766.23-P1P2|Grem2_+_174921598.23-P1P2
Ube2o	P1P2	Ube2o_-_116581438.23-P1P2	GGCTCTGCGCGAGTCTCGgg	1	Ube2o_+_116581409.23-P1P2	GGACTCGCGCAGAGCAGTTA	2	Ube2o_-_116581438.23-P1P2|Ube2o_+_116581409.23-P1P2
Ttc27	P1P2	Ttc27_-_74717965.23-P1P2	GCTTCTGAGGGGCTTCTCCA	1	Ttc27_-_74717804.23-P1P2	GTGCATGTATAATCTCACAT	2	Ttc27_-_74717965.23-P1P2|Ttc27_-_74717804.23-P1P2
Trabd2b	P1P2	Trabd2b_+_114406289.23-P1P2	GCCCCGAGCCCGGCTCAGAg	1	Trabd2b_+_114406286.23-P1P2	GCGAGCCCGGCTCAGAgggg	2	Trabd2b_+_114406289.23-P1P2|Trabd2b_+_114406286.23-P1P2
Gsdmc4	P1P2	Gsdmc4_-_63912251.23-P1P2	Gactagaatccagaagaact	1	Gsdmc4_-_63912060.23-P1P2	GGCTTTAAAGGTTCCGTCAG	2	Gsdmc4_-_63912251.23-P1P2|Gsdmc4_-_63912060.23-P1P2
Skiv2l	P1P2	Skiv2l_+_34850099.23-P1P2	Gggaggagagtggacgggag	1	Skiv2l_+_34850162.23-P1P2	GGGCTGCTCGGGAGCTGCCG	2	Skiv2l_+_34850099.23-P1P2|Skiv2l_+_34850162.23-P1P2
Ccdc117	P1P2	Ccdc117_+_5542135.23-P1P2	GCTCAGAGGCAGGTAATCGT	1	Ccdc117_+_5542167.23-P1P2	GTAGAAGGCGTGAGGTTGGG	2	Ccdc117_+_5542135.23-P1P2|Ccdc117_+_5542167.23-P1P2
Cuta	P1P2	Cuta_+_26939439.23-P1P2	GGGCTACTGCAGGTAAGAGG	1	Cuta_+_26939506.23-P1P2	GAGGTCTGGAGACTCCGGGA	2	Cuta_+_26939439.23-P1P2|Cuta_+_26939506.23-P1P2
Col19a1	P1P2	Col19a1_-_24587377.23-P1P2	GTGGTGTCAGAGCCCCTGGG	1	Col19a1_-_24587398.23-P1P2	GGCGCGGTGGAGTCCGGACA	2	Col19a1_-_24587377.23-P1P2|Col19a1_-_24587398.23-P1P2
S100a10	P1P2	S100a10_+_93555158.23-P1P2	GAGCTGGGCACACCACGATG	1	S100a10_+_93555235.23-P1P2	GGCGGGTGTGGGGTTCCCAG	2	S100a10_+_93555158.23-P1P2|S100a10_+_93555235.23-P1P2
Samd1	P1P2	Samd1_+_83997559.23-P1P2	GctcctccgcctccccccGG	1	Samd1_+_83997534.23-P1P2	GCAGCGCCTCGGCGGAGCGG	2	Samd1_+_83997559.23-P1P2|Samd1_+_83997534.23-P1P2
Ccdc38	P1P2	Ccdc38_+_93540677.23-P1P2	GTCCAGGCTCCCTTCATCCT	1	Ccdc38_-_93540690.23-P1P2	GAAGCGGTTCCCAGGATGAA	2	Ccdc38_+_93540677.23-P1P2|Ccdc38_-_93540690.23-P1P2
Gm806	P1P2	Gm806_+_50467353.23-P1P2	GCCCAAAAGTCACCAATCTA	1	Gm806_-_50467757.23-P1P2	GTGGTCCAGAGAAGGATCTT	2	Gm806_+_50467353.23-P1P2|Gm806_-_50467757.23-P1P2
Ssbp4	P1P2	Ssbp4_-_70608258.23-P1P2	GCATGTCCGCGCGGGAGCTC	1	Ssbp4_+_70608288.23-P1P2	GCGCTTCCCGGAACAGCCCG	2	Ssbp4_-_70608258.23-P1P2|Ssbp4_+_70608288.23-P1P2
Ccdc83	P1P2	Ccdc83_-_90265390.23-P1P2	GGAGTGGTGAAAGAGGGGCA	1	Ccdc83_-_90265384.23-P1P2	GTCTCCAGAGTGGTGAAAGA	2	Ccdc83_-_90265390.23-P1P2|Ccdc83_-_90265384.23-P1P2
Metap1d	P1P2	Metap1d_-_71453364.23-P1P2	GGTGACCGGAGCCAACATGG	1	Metap1d_+_71453379.23-P1P2	GTACCTCCACGGACGAGCAG	2	Metap1d_-_71453364.23-P1P2|Metap1d_+_71453379.23-P1P2
Ank1	P1P2	Ank1_-_23035142.23-P1P2	GAGCAGTGGCAAGTCCCCTA	1	Ank1_+_23035185.23-P1P2	GTGCCGGCCGGAGGGCTGGA	2	Ank1_-_23035142.23-P1P2|Ank1_+_23035185.23-P1P2
Mast3	P2	Mast3_-_70796975.23-P2	GCGCGGGAACCGACGCCCGG	1	Mast3_-_70796947.23-P2	GTTCTCCCTGCGGGACTTCA	2	Mast3_-_70796975.23-P2|Mast3_-_70796947.23-P2
Tlr9	P1P2	Tlr9_+_106222654.23-P1P2	GCTCCCTCTGACAAACTGGG	1	Tlr9_+_106222657.23-P1P2	GAGGCTCCCTCTGACAAACT	2	Tlr9_+_106222654.23-P1P2|Tlr9_+_106222657.23-P1P2
Abcd2	P1P2	Abcd2_+_91191781.23-P1P2	GGACTCGCCCCCGGAGGATG	1	Abcd2_-_91191685.23-P1P2	GTCCGCGGAAAGCCCAGCAA	2	Abcd2_+_91191781.23-P1P2|Abcd2_-_91191685.23-P1P2
Olfr1034	ENSMUST00000079298.2	Olfr1034_-_86046480.23-ENSMUST00000079298.2	GAAACATAGACATTATATTA	1	Olfr1034_-_86046822.23-ENSMUST00000079298.2	GCACGTGGAGGTCTATATTC	2	Olfr1034_-_86046480.23-ENSMUST00000079298.2|Olfr1034_-_86046822.23-ENSMUST00000079298.2
Arsj	P1P2	Arsj_-_126363923.23-P1P2	GACTGCCTGGCGAACAGAGG	1	Arsj_-_126363920.23-P1P2	GGCGACTGCCTGGCGAACAG	2	Arsj_-_126363923.23-P1P2|Arsj_-_126363920.23-P1P2
Lcmt2	P1P2	Lcmt2_-_121140609.23-P1P2	GTCGCGGGCCCATGACGAGA	1	Lcmt2_+_121140656.23-P1P2	GGAAGTGACGCACCCAGAAG	2	Lcmt2_-_121140609.23-P1P2|Lcmt2_+_121140656.23-P1P2
Fam26f	P1P2	Fam26f_+_34127905.23-P1P2	GCCAGTGTGAGCAGAACCCA	1	Fam26f_-_34127730.23-P1P2	GCCCAGGAGGAAAAGCGCGA	2	Fam26f_+_34127905.23-P1P2|Fam26f_-_34127730.23-P1P2
Usp27x	P1P2	Usp27x_+_7375796.23-P1P2	Gaggaaggtggaggcggaga	1	Usp27x_+_7375403.23-P1P2	GcctgagAGGCAGCCCGAGA	2	Usp27x_+_7375796.23-P1P2|Usp27x_+_7375403.23-P1P2
Itgad	P1P2	Itgad_+_128174010.23-P1P2	GAGGCTTACCCCAGCCACAC	1	Itgad_+_128174029.23-P1P2	GGACCCCCTGCCCTGCTGTA	2	Itgad_+_128174010.23-P1P2|Itgad_+_128174029.23-P1P2
Tmem108	P1P2	Tmem108_-_103761785.23-P1P2	GGCGCTCCGGCTCCCTCCGA	1	Tmem108_+_103761753.23-P1P2	GAGCCGGAGCGCTTCTCCCG	2	Tmem108_-_103761785.23-P1P2|Tmem108_+_103761753.23-P1P2
9430007A20Rik	P1P2	9430007A20Rik_-_144519882.23-P1P2	GTCCCTCTGAAGGAATACAA	1	9430007A20Rik_+_144519854.23-P1P2	GATTCCTTCAGAGGGAGCCG	2	9430007A20Rik_-_144519882.23-P1P2|9430007A20Rik_+_144519854.23-P1P2
Sh2d1a	P1P2	Sh2d1a_+_42502635.23-P1P2	GGCCGCTGCAGTGGCTTACT	1	Sh2d1a_+_42502832.23-P1P2	GACACAGGCAGTACACGCCA	2	Sh2d1a_+_42502635.23-P1P2|Sh2d1a_+_42502832.23-P1P2
Fam49b	P1	Fam49b_-_63998064.23-P1	GGCGAAGAGCCAGGCGACAG	1	Fam49b_-_63998038.23-P1	GTCCGCACCTGCCCCTCTGG	2	Fam49b_-_63998064.23-P1|Fam49b_-_63998038.23-P1
Tal1	P1	Tal1_-_115059536.23-P1	GCAGACCGCGCAGGACCTCA	1	Tal1_+_115059592.23-P1	GGCTGGAGAGGGGTCGAGGT	2	Tal1_-_115059536.23-P1|Tal1_+_115059592.23-P1
Fam124b	P1P2	Fam124b_+_80213798.23-P1P2	GGCCAGGAGCATGTGTGATC	1	Fam124b_+_80213825.23-P1P2	GACATTCCCCGCTGGAGCAC	2	Fam124b_+_80213798.23-P1P2|Fam124b_+_80213825.23-P1P2
Hist3h2a	P1P2	Hist3h2a_-_58954744.23-P1P2	GGTTATCAGTGGAAGATGTC	1	Hist3h2a_-_58954750.23-P1P2	GAGTGGAAGATGTCTGGTCG	2	Hist3h2a_-_58954744.23-P1P2|Hist3h2a_-_58954750.23-P1P2
Egln2	P1P2	Egln2_+_27166708.23-P1P2	GgggcggCTGGCACAAACGG	1	Egln2_+_27166650.23-P1P2	GGCGCGAAGGGAAAGACCCG	2	Egln2_+_27166708.23-P1P2|Egln2_+_27166650.23-P1P2
Uros	P2	Uros_-_133702443.23-P2	GCTGCGGCAGAGCGAGGAAA	1	Uros_+_133702468.23-P2	GTCTCCTTCCAACATCACCT	2	Uros_-_133702443.23-P2|Uros_+_133702468.23-P2
Bend4	P1P2	Bend4_-_67428040.23-P1P2	GCTCGGCTGTGGACGTGAGG	1	Bend4_-_67428046.23-P1P2	GTGTGGACGTGAGGCGGCAG	2	Bend4_-_67428040.23-P1P2|Bend4_-_67428046.23-P1P2
Hoxa9	P1P2	Hoxa9_-_52225840.23-P1P2	GCGCCTGGGGATGCACGTAG	1	Hoxa9_+_52225984.23-P1P2	GGACCCTGGGTCAACCCCCA	2	Hoxa9_-_52225840.23-P1P2|Hoxa9_+_52225984.23-P1P2
Il17rd	P1P2	Il17rd_-_27039089.23-P1P2	GAGCGGAGACCGGCCCAACT	1	Il17rd_-_27039058.23-P1P2	GGGACTAGAGAGCGAGCTAC	2	Il17rd_-_27039089.23-P1P2|Il17rd_-_27039058.23-P1P2
Abca9	P1P2	Abca9_-_110168130.23-P1P2	GTTCTTCTGAGGGTTCAGAC	1	Abca9_+_110167847.23-P1P2	GGGAGAAAGTCGCCAAGTGT	2	Abca9_-_110168130.23-P1P2|Abca9_+_110167847.23-P1P2
Pmpcb	P1P2	Pmpcb_+_21737187.23-P1P2	GAACAGCGTCCGGGATAGAG	1	Pmpcb_-_21737183.23-P1P2	GTTCTCCACCGCAGAGATGG	2	Pmpcb_+_21737187.23-P1P2|Pmpcb_-_21737183.23-P1P2
Coprs	P1P2	Coprs_+_13890222.23-P1P2	GCGGCCGGGCATGGACCCTC	1	Coprs_+_13890025.23-P1P2	GCAGAGAGCCTGGCCGGTAA	2	Coprs_+_13890222.23-P1P2|Coprs_+_13890025.23-P1P2
BC051665	ENSMUST00000026078.8	BC051665_+_60786287.23-ENSMUST00000026078.8	GGCCCAGCTATGTACATCCC	1	BC051665_-_60786292.23-ENSMUST00000026078.8	GGAGCTATGGGGGCTCACCT	2	BC051665_+_60786287.23-ENSMUST00000026078.8|BC051665_-_60786292.23-ENSMUST00000026078.8
Olfr1497	ENSMUST00000061993.2	Olfr1497_-_13795375.23-ENSMUST00000061993.2	GCAGCACAGCCAGCATCTGA	1	Olfr1497_+_13795605.23-ENSMUST00000061993.2	GAGGTAAACTTCTAGATGGA	2	Olfr1497_-_13795375.23-ENSMUST00000061993.2|Olfr1497_+_13795605.23-ENSMUST00000061993.2
Gemin4	P1	Gemin4_-_76217491.23-P1	GAACCCACCTAGGTCCATGG	1	Gemin4_+_76217516.23-P1	GCGCGGCCTTGGACTAGGAG	2	Gemin4_-_76217491.23-P1|Gemin4_+_76217516.23-P1
Klhl35	P2	Klhl35_+_99468707.23-P2	GGAGGCGAGCGAGAAGGCGG	1	Klhl35_+_99468710.23-P2	GAGGGAGGCGAGCGAGAAGG	2	Klhl35_+_99468707.23-P2|Klhl35_+_99468710.23-P2
Pdlim4	P1P2	Pdlim4_-_54068971.23-P1P2	GCCAGAGCTGGAGCCGGACA	1	Pdlim4_+_54068983.23-P1P2	Gggccaggcggcggcaacag	2	Pdlim4_-_54068971.23-P1P2|Pdlim4_+_54068983.23-P1P2
Ankrd29	P1P2	Ankrd29_+_12305657.23-P1P2	GGAGcgagcggggaccgagc	1	Ankrd29_+_12305668.23-P1P2	GGCGGGCGCAGAGAGcgagc	2	Ankrd29_+_12305657.23-P1P2|Ankrd29_+_12305668.23-P1P2
Olfr498	ENSMUST00000074787.1	Olfr498_-_108465328.23-ENSMUST00000074787.1	GGGAGCAGTTATGTGTCTCA	1	Olfr498_-_108465380.23-ENSMUST00000074787.1	GTGACAGAGTTTTTTTTATT	2	Olfr498_-_108465328.23-ENSMUST00000074787.1|Olfr498_-_108465380.23-ENSMUST00000074787.1
Brinp3	P2	Brinp3_-_146497719.23-P2	GTAATCAGTGTGACACAGTG	1	Brinp3_-_146497740.23-P2	GGCACAGACGTTCGCTGTCT	2	Brinp3_-_146497719.23-P2|Brinp3_-_146497740.23-P2
Ckmt2	P1P2	Ckmt2_-_91876834.23-P1P2	GTGACTGACCTTGAAGCTGG	1	Ckmt2_-_91876898.23-P1P2	GAGTGTAACAGGAGCCTGTG	2	Ckmt2_-_91876834.23-P1P2|Ckmt2_-_91876898.23-P1P2
Hoxc9	P1P2	Hoxc9_+_102976435.23-P1P2	GGCAGCCTCCCGCCCAGGGA	1	Hoxc9_-_102976500.23-P1P2	GGGAGCCAAGAAGCAGGTAA	2	Hoxc9_+_102976435.23-P1P2|Hoxc9_-_102976500.23-P1P2
Pramel6	ENSMUST00000111572.1	Pramel6_-_87507503.23-ENSMUST00000111572.1	GCCTGGTATGGATGGTCAAG	1	Pramel6_+_87507472.23-ENSMUST00000111572.1	GATCCATACCAGGCTTAAAT	2	Pramel6_-_87507503.23-ENSMUST00000111572.1|Pramel6_+_87507472.23-ENSMUST00000111572.1
Phospho1	P1P2	Phospho1_-_95824511.23-P1P2	GGCGGTGGGCCCGGGTGCTG	1	Phospho1_-_95824564.23-P1P2	GGGCTCCCCGGCATTTAAAG	2	Phospho1_-_95824511.23-P1P2|Phospho1_-_95824564.23-P1P2
Cfl1	P1P2	Cfl1_-_5490743.23-P1P2	GGATTAAGGGTCTCATTGAA	1	Cfl1_-_5490536.23-P1P2	GGCCGCGTTCAGTCGGATCC	2	Cfl1_-_5490743.23-P1P2|Cfl1_-_5490536.23-P1P2
Hn1	P1P2	Hn1_+_115514358.23-P1P2	GGAAGCTCGTGGAGCCCTGG	1	Hn1_+_115514382.23-P1P2	GAGTCCGGCGAGCCCCGCGG	2	Hn1_+_115514358.23-P1P2|Hn1_+_115514382.23-P1P2
Tle1	P1P2	Tle1_+_72200636.23-P1P2	GCTAAGAGCCGAGGAGGGGA	1	Tle1_+_72200679.23-P1P2	GGGTCGTGAGAACTTTGCGG	2	Tle1_+_72200636.23-P1P2|Tle1_+_72200679.23-P1P2
Zfp109	P1P2	Zfp109_+_24237638.23-P1P2	GCTCCGGGTGTGCCAGGGAG	1	Zfp109_-_24237606.23-P1P2	GGGACACTCAGGGAACACGG	2	Zfp109_+_24237638.23-P1P2|Zfp109_-_24237606.23-P1P2
Ccdc25	P1P2	Ccdc25_+_65837437.23-P1P2	GCATGATCCTGGTAGAAGAG	1	Ccdc25_-_65837369.23-P1P2	GGTCCGCCGGAAGTGTCCTG	2	Ccdc25_+_65837437.23-P1P2|Ccdc25_-_65837369.23-P1P2
Zfp260	P1P2	Zfp260_+_30095191.23-P1P2	GACCCAGACAAAGGCGACGA	1	Zfp260_-_30095211.23-P1P2	GGCCATCGTCGCCTTTGTCT	2	Zfp260_+_30095191.23-P1P2|Zfp260_-_30095211.23-P1P2
Atp6ap1l	P1P2	Atp6ap1l_-_90905355.23-P1P2	GTGTAGAGCAAGCAGAGCAG	1	Atp6ap1l_+_90905287.23-P1P2	GGAAGCATACACTTCTTGAT	2	Atp6ap1l_-_90905355.23-P1P2|Atp6ap1l_+_90905287.23-P1P2
Clec2g	P1P2	Clec2g_+_128934436.23-P1P2	GAGTGGTGTTGAGCATAGGT	1	Clec2g_-_128934431.23-P1P2	GTCTGAGATGAACATTACAA	2	Clec2g_+_128934436.23-P1P2|Clec2g_-_128934431.23-P1P2
Hist1h1a	P1P2	Hist1h1a_+_23763756.23-P1P2	GGCAGCAGCAGGTTTCTCCG	1	Hist1h1a_-_23763728.23-P1P2	GTCAGCAACCATGTCGGAGA	2	Hist1h1a_+_23763756.23-P1P2|Hist1h1a_-_23763728.23-P1P2
Lcn5	P1P2	Lcn5_-_25657968.23-P1P2	GAAAAGCTATGGCTTCTGGT	1	Lcn5_+_25658177.23-P1P2	GAGTAGTAAAGGGTTCTACA	2	Lcn5_-_25657968.23-P1P2|Lcn5_+_25658177.23-P1P2
Dbil5	P1P2	Dbil5_+_76217708.23-P1P2	GGGAAGCCTAGGCCGAGAGG	1	Dbil5_+_76217641.23-P1P2	GAGTACGCGTGCGCCTTGAA	2	Dbil5_+_76217708.23-P1P2|Dbil5_+_76217641.23-P1P2
Pdpk1	P2	Pdpk1_-_24150833.23-P2	GTCAGGGCAACGAACAGGAG	1	Pdpk1_-_24150817.23-P2	GAGTCTGGCTGCCCACCTCA	2	Pdpk1_-_24150833.23-P2|Pdpk1_-_24150817.23-P2
Vmn1r184	ENSMUST00000057123.6	Vmn1r184_+_26266846.23-ENSMUST00000057123.6	GCTGGCAGCCAGATTCCAGA	1	Vmn1r184_-_26267044.23-ENSMUST00000057123.6	GCAGGAGTGCCCCACATAAT	2	Vmn1r184_+_26266846.23-ENSMUST00000057123.6|Vmn1r184_-_26267044.23-ENSMUST00000057123.6
Iqgap3	P1P2	Iqgap3_-_88082041.23-P1P2	GGCGGCGGGAGATTCAAAAC	1	Iqgap3_-_88082070.23-P1P2	GAGGAACATGGAGCCGTGCG	2	Iqgap3_-_88082041.23-P1P2|Iqgap3_-_88082070.23-P1P2
Zfp839	P1P2	Zfp839_+_110850300.23-P1P2	GGCCATGGCGGCCTATGGGG	1	Zfp839_-_110850343.23-P1P2	GAGGCGCGGAACCGGAGTCC	2	Zfp839_+_110850300.23-P1P2|Zfp839_-_110850343.23-P1P2
Mthfd1	P1P2	Mthfd1_-_76255422.23-P1P2	GGGGAGGTCCCTGAGCACGT	1	Mthfd1_-_76255666.23-P1P2	GGAAGAGAGGACATCGACAC	2	Mthfd1_-_76255422.23-P1P2|Mthfd1_-_76255666.23-P1P2
Sla2	P1P2	Sla2_+_156887151.23-P1P2	GTACACGGGCTCAGGTCCCT	1	Sla2_-_156887157.23-P1P2	GGGACAAAGAGCGTGGCCTA	2	Sla2_+_156887151.23-P1P2|Sla2_-_156887157.23-P1P2
Trim32	P1P2	Trim32_-_65605073.23-P1P2	GGAGCTGCGGGCGGTCAGGT	1	Trim32_-_65605076.23-P1P2	GCTGCGGGCGGTCAGGTAGG	2	Trim32_-_65605073.23-P1P2|Trim32_-_65605076.23-P1P2
Trit1	P1P2	Trit1_-_123016661.23-P1P2	GCTGTGAGCTCTGGATTCCG	1	Trit1_+_123016678.23-P1P2	GCCCCGAGAATCACTACAAG	2	Trit1_-_123016661.23-P1P2|Trit1_+_123016678.23-P1P2
Btnl1	P1P2	Btnl1_-_34377210.23-P1P2	GCTCTAAAGCCAGAGCCTGG	1	Btnl1_-_34377361.23-P1P2	GAGTGCACTGAGGATCCCTG	2	Btnl1_-_34377210.23-P1P2|Btnl1_-_34377361.23-P1P2
Rab11a	P1P2	Rab11a_-_64737645.23-P1P2	GGCGCGGCCGAGGAGCTGAG	1	Rab11a_-_64737681.23-P1P2	GGCAACGGCGGCGGGACCAG	2	Rab11a_-_64737645.23-P1P2|Rab11a_-_64737681.23-P1P2
Lrrc58	P1P2	Lrrc58_+_37868462.23-P1P2	GCCGGGCCCGCGAGCCGAGG	1	Lrrc58_+_37868452.23-P1P2	GGAGCCGAGGCGGCGCGCCC	2	Lrrc58_+_37868462.23-P1P2|Lrrc58_+_37868452.23-P1P2
Fgf11	ENSMUST00000102585.1	Fgf11_+_69801791.23-ENSMUST00000102585.1	GCTAGTCAGGGCCCAAGGGT	1	Fgf11_+_69801795.23-ENSMUST00000102585.1	GGGAGCTAGTCAGGGCCCAA	2	Fgf11_+_69801791.23-ENSMUST00000102585.1|Fgf11_+_69801795.23-ENSMUST00000102585.1
Slc25a53	ENSMUST00000171738.1	Slc25a53_+_136993061.23-ENSMUST00000171738.1	GGCTAATGCCTGCCAGAGGG	1	Slc25a53_-_136993071.23-ENSMUST00000171738.1	GTCTAGCAGGTTCCCCCCTC	2	Slc25a53_+_136993061.23-ENSMUST00000171738.1|Slc25a53_-_136993071.23-ENSMUST00000171738.1
Rab22a	P1P2	Rab22a_+_173660088.23-P1P2	GGCCATGGCCCGGGAACCAG	1	Rab22a_-_173659833.23-P1P2	GAGAAGGTGGCTGCCGAAGT	2	Rab22a_+_173660088.23-P1P2|Rab22a_-_173659833.23-P1P2
L3mbtl1	P1P2	L3mbtl1_-_162943551.23-P1P2	GAGCCATGCAGGTAAGAACG	1	L3mbtl1_+_162943494.23-P1P2	GGCACCGAGCGACCGACCGT	2	L3mbtl1_-_162943551.23-P1P2|L3mbtl1_+_162943494.23-P1P2
Cyp2j9	P1P2	Cyp2j9_+_96591317.23-P1P2	GGCGGCAGCCGGCTCCCTAG	1	Cyp2j9_-_96591362.23-P1P2	GGCATGGCTGATATCAGAGC	2	Cyp2j9_+_96591317.23-P1P2|Cyp2j9_-_96591362.23-P1P2
Racgap1	P1P2	Racgap1_-_99651583.23-P1P2	GCGGCCGCCGCGCCCCAGGA	1	Racgap1_+_99651574.23-P1P2	GGGTAGACAGCAGCCCTCCT	2	Racgap1_-_99651583.23-P1P2|Racgap1_+_99651574.23-P1P2
Rela	P1P2	Rela_+_5637817.23-P1P2	GTCCATGGTCAGGGTCCCGG	1	Rela_+_5637873.23-P1P2	GCGCAGGCCCCGGAGCTCTA	2	Rela_+_5637817.23-P1P2|Rela_+_5637873.23-P1P2
Olfr446	ENSMUST00000101461.1	Olfr446_+_42927443.23-ENSMUST00000101461.1	GATCTTAGGGGCAGTGCTGG	1	Olfr446_-_42927655.23-ENSMUST00000101461.1	GTGGAGAGTATGCTCCATCC	2	Olfr446_+_42927443.23-ENSMUST00000101461.1|Olfr446_-_42927655.23-ENSMUST00000101461.1
Capsl	P1P2	Capsl_-_9436089.23-P1P2	GGAGGGAGACACAGGACCAT	1	Capsl_-_9436109.23-P1P2	GGGAGGAGACTAGAGTCCCC	2	Capsl_-_9436089.23-P1P2|Capsl_-_9436109.23-P1P2
Wdr35	P1P2	Wdr35_+_8974211.23-P1P2	GCGGCGGGCTACAGGAATGG	1	Wdr35_-_8974090.23-P1P2	GCACCAGTGCTCGCAAATGG	2	Wdr35_+_8974211.23-P1P2|Wdr35_-_8974090.23-P1P2
Clk1	P1P2	Clk1_-_58423975.23-P1P2	GGACAAAGCTTACAAGGCGA	1	Clk1_-_58423969.23-P1P2	GGGCGAAGACAAAGCTTACA	2	Clk1_-_58423975.23-P1P2|Clk1_-_58423969.23-P1P2
Smarcd1	P1P2	Smarcd1_+_99702341.23-P1P2	GGCCGCTCGGAGCCACAGAC	1	Smarcd1_-_99702361.23-P1P2	GTCCAGTCTGTGGCTCCGAG	2	Smarcd1_+_99702341.23-P1P2|Smarcd1_-_99702361.23-P1P2
Adrm1	P1P2	Adrm1_+_180171649.23-P1P2	GCGGCCTAGGGGCACCGTCC	1	Adrm1_-_180171639.23-P1P2	GGGCCCGGCAGGCGCCGAGG	2	Adrm1_+_180171649.23-P1P2|Adrm1_-_180171639.23-P1P2
C2	P1P2	C2_-_34882027.23-P1P2	GCAGTAGAACGGAGAGCTAG	1	C2_-_34881852.23-P1P2	GACCAGGCCAGATGAGAGAG	2	C2_-_34882027.23-P1P2|C2_-_34881852.23-P1P2
Ky	P1P2	Ky_-_102506145.23-P1P2	GCGGGAGGGAGGCGGCACCA	1	Ky_+_102506332.23-P1P2	GCCCCGGCGAGAGGACCCGG	2	Ky_-_102506145.23-P1P2|Ky_+_102506332.23-P1P2
Pnrc2	P1P2	Pnrc2_-_135873777.23-P1P2	GACAGCCCACGAACGAGTCA	1	Pnrc2_+_135873591.23-P1P2	GAGAGGAAGTGAGGCCGGTC	2	Pnrc2_-_135873777.23-P1P2|Pnrc2_+_135873591.23-P1P2
Orc2	P1P2	Orc2_-_58504887.23-P1P2	GCCGGGGAGGCCAGCGTCTA	1	Orc2_+_58504898.23-P1P2	GGCGCAGGTTCGGCTTGGAC	2	Orc2_-_58504887.23-P1P2|Orc2_+_58504898.23-P1P2
Vmn1r132	ENSMUST00000098736.3	Vmn1r132_+_21612810.23-ENSMUST00000098736.3	GTTTCCTAGTGCCTAAATTG	1	Vmn1r132_+_21612839.23-ENSMUST00000098736.3	GCTGCAGAGCACAGCTTCTA	2	Vmn1r132_+_21612810.23-ENSMUST00000098736.3|Vmn1r132_+_21612839.23-ENSMUST00000098736.3
Kdm3a	P1P2	Kdm3a_+_71632887.23-P1P2	GAGAGCTAGAGTCGGCTGGG	1	Kdm3a_-_71632873.23-P1P2	GCCTGAGTCACCCACGACGG	2	Kdm3a_+_71632887.23-P1P2|Kdm3a_-_71632873.23-P1P2
Bicd1	P1P2	Bicd1_-_149409066.23-P1P2	GCCTCCCACGGAGCATTGGG	1	Bicd1_-_149409037.23-P1P2	GGCAGGGCCCAGCAAGCAGG	2	Bicd1_-_149409066.23-P1P2|Bicd1_-_149409037.23-P1P2
Lhfpl1	P1P2	Lhfpl1_-_145348900.23-P1P2	GCAGCTTGTCAGACAGGGAT	1	Lhfpl1_-_145348895.23-P1P2	GTCTCACAGCTTGTCAGACA	2	Lhfpl1_-_145348900.23-P1P2|Lhfpl1_-_145348895.23-P1P2
Bnip3l	P1	Bnip3l_+_67008866.23-P1	GTGCGCAGACGCAGAAAAGG	1	Bnip3l_+_67008407.23-P1	GAGGCGCACGCAACTCGGGG	2	Bnip3l_+_67008866.23-P1|Bnip3l_+_67008407.23-P1
Nfkb1	P1P2	Nfkb1_+_135691455.23-P1P2	GGGACGAGAGAGAAGTACCG	1	Nfkb1_-_135691424.23-P1P2	GGCGCGCAGCCGGGCTGCTC	2	Nfkb1_+_135691455.23-P1P2|Nfkb1_-_135691424.23-P1P2
Vit	P1P2	Vit_+_78508187.23-P1P2	GAAGAAGCAAGAGGAGGTCG	1	Vit_-_78508224.23-P1P2	GCTTCTTCTTTAGAATAATT	2	Vit_+_78508187.23-P1P2|Vit_-_78508224.23-P1P2
Epha6	P1P2	Epha6_+_60605205.23-P1P2	GGCCGCCAGGAGCTCCCCGG	1	Epha6_+_60605251.23-P1P2	GTCGCTCGAGCGGGACACGG	2	Epha6_+_60605205.23-P1P2|Epha6_+_60605251.23-P1P2
Gm13011	P1P2	Gm13011_-_137409792.23-P1P2	GGGTGATAAGAAAGATGTGG	1	Gm13011_-_137409637.23-P1P2	GGGTATGGAGTGTCTCCCAG	2	Gm13011_-_137409792.23-P1P2|Gm13011_-_137409637.23-P1P2
Arid2	P1P2	Arid2_+_96287594.23-P1P2	GGCGCCCGGAGCCCATTCCT	1	Arid2_-_96287605.23-P1P2	GCCACCGCCGGCCGAGGAAT	2	Arid2_+_96287594.23-P1P2|Arid2_-_96287605.23-P1P2
Ddx39b	P1P2	Ddx39b_+_35241826.23-P1P2	GGCACTGCGAGCGTGTATGG	1	Ddx39b_+_35241863.23-P1P2	GTGGCGGTGGATGGTGCACA	2	Ddx39b_+_35241826.23-P1P2|Ddx39b_+_35241863.23-P1P2
Atp6v1h	P1P2	Atp6v1h_+_5083181.23-P1P2	GGAGACCCAGAGCAGAACGA	1	Atp6v1h_+_5083169.23-P1P2	GAGAACGAAGGCGACTCCGT	2	Atp6v1h_+_5083181.23-P1P2|Atp6v1h_+_5083169.23-P1P2
Astn2	P1P2	Astn2_-_66404409.23-P1P2	GGTGGCGACCGTGAAGAAGA	1	Astn2_-_66404469.23-P1P2	GAACCAGGACGCCCGAGCTA	2	Astn2_-_66404409.23-P1P2|Astn2_-_66404469.23-P1P2
Vpreb3	P1P2	Vpreb3_+_75948365.23-P1P2	GGAGCAGAGGCAGGCAACCA	1	Vpreb3_+_75948378.23-P1P2	GAGGTTCCTATCAGGAGCAG	2	Vpreb3_+_75948365.23-P1P2|Vpreb3_+_75948378.23-P1P2
Hemk1	P1P2	Hemk1_+_107338275.23-P1P2	GAGCGTGCATGCCCTCTGGT	1	Hemk1_-_107338286.23-P1P2	GCTGGTGCATACCTACCAGA	2	Hemk1_+_107338275.23-P1P2|Hemk1_-_107338286.23-P1P2
Angptl4	P1P2	Angptl4_-_33781519.23-P1P2	GTCTGGTGCAGAAGAAGATC	1	Angptl4_-_33781363.23-P1P2	GGTAGCCGCGCATAGCACCA	2	Angptl4_-_33781519.23-P1P2|Angptl4_-_33781363.23-P1P2
Irgc1	P1	Irgc1_+_24435488.23-P1	GCACCAGCTGGGAGAGTGTG	1	Irgc1_-_24435459.23-P1	GCTGGAGAGCCTGGCCCTCA	2	Irgc1_+_24435488.23-P1|Irgc1_-_24435459.23-P1
Gfi1b	P1P2	Gfi1b_+_28621897.23-P1P2	GGCAGTCCCCAGGGACAGTG	1	Gfi1b_-_28621855.23-P1P2	GCTGGCAGCACTCACCGTCA	2	Gfi1b_+_28621897.23-P1P2|Gfi1b_-_28621855.23-P1P2
Jak1	P1P2	Jak1_-_101265161.23-P1P2	GGACACCCGCGGCTAAGGAG	1	Jak1_-_101265171.23-P1P2	GGCTAAGGAGAGGCACCGAA	2	Jak1_-_101265161.23-P1P2|Jak1_-_101265171.23-P1P2
Prop1	P2	Prop1_+_50952422.23-P2	GGCAGCCAGAGCAGCGGTAA	1	Prop1_+_50952447.23-P2	GAGGTGACGCACAAACGTGT	2	Prop1_+_50952422.23-P2|Prop1_+_50952447.23-P2
Ctns	P1P2	Ctns_-_73198986.23-P1P2	GCTCGCACCAGAAACCGCTT	1	Ctns_-_73198995.23-P1P2	GGAAACCGCTTAGGAGTGTA	2	Ctns_-_73198986.23-P1P2|Ctns_-_73198995.23-P1P2
3110035E14Rik	P1P2	3110035E14Rik_-_9601328.23-P1P2	GCCTAGCTGAGAGGGAGAGA	1	3110035E14Rik_-_9601228.23-P1P2	GAGCTGTGCGCTAACTGAGT	2	3110035E14Rik_-_9601328.23-P1P2|3110035E14Rik_-_9601228.23-P1P2
Slc17a5	P1P2	Slc17a5_-_78587960.23-P1P2	GCCGCCGGACCCCGAAGCAG	1	Slc17a5_-_78587975.23-P1P2	GGCAGGGGCCTCATAACGCC	2	Slc17a5_-_78587960.23-P1P2|Slc17a5_-_78587975.23-P1P2
Coro2a	P1P2	Coro2a_+_46601810.23-P1P2	GCGCGGCAGCCAACAAGGTA	1	Coro2a_+_46601881.23-P1P2	GACTGGGCGCGGGGACTCGG	2	Coro2a_+_46601810.23-P1P2|Coro2a_+_46601881.23-P1P2
Pmf1	P1P2	Pmf1_+_88410265.23-P1P2	GTAGCGAGGCTGCGGAAAGG	1	Pmf1_-_88410039.23-P1P2	GCCGCGGCGAGAGGTTTCAG	2	Pmf1_+_88410265.23-P1P2|Pmf1_-_88410039.23-P1P2
Cd300ld	P1P2	Cd300ld_+_114989818.23-P1P2	GTCGTCAACAAGGACATGAG	1	Cd300ld_-_114989850.23-P1P2	GCTTGTTGACGACAGATGTC	2	Cd300ld_+_114989818.23-P1P2|Cd300ld_-_114989850.23-P1P2
Vegfb	P1P2	Vegfb_-_6987405.23-P1P2	GCAGCAGGCGACGGAGCAGG	1	Vegfb_-_6987634.23-P1P2	GGGCAGGCGGCCTGTAGTGG	2	Vegfb_-_6987405.23-P1P2|Vegfb_-_6987634.23-P1P2
Ddo	P1P2	Ddo_-_40630061.23-P1P2	GGTGTTGGTGCCAGGACCTC	1	Ddo_+_40630049.23-P1P2	GTGGTATCCACCGGAGGTCC	2	Ddo_-_40630061.23-P1P2|Ddo_+_40630049.23-P1P2
Eif3i	P1P2	Eif3i_-_129600568.23-P1P2	GGCCTACTGAGGCCCCCCGA	1	Eif3i_-_129600651.23-P1P2	GTGGGACCGGAAAAAGACTA	2	Eif3i_-_129600568.23-P1P2|Eif3i_-_129600651.23-P1P2
Atp5j2	P1P2	Atp5j2_-_145191488.23-P1P2	GCCAACCCCAAGGCCAGGAA	1	Atp5j2_+_145191531.23-P1P2	GGCGCGCGGCTGGAGTTCTG	2	Atp5j2_-_145191488.23-P1P2|Atp5j2_+_145191531.23-P1P2
Olfr1357	ENSMUST00000095473.2	Olfr1357_-_78617995.23-ENSMUST00000095473.2	GTAGTCCCCAGGAAGGGTAC	1	Olfr1357_-_78617998.23-ENSMUST00000095473.2	GTCCCCAGGAAGGGTACAGG	2	Olfr1357_-_78617995.23-ENSMUST00000095473.2|Olfr1357_-_78617998.23-ENSMUST00000095473.2
Ucp2	P2	Ucp2_+_100498224.23-P2	GTCTCGTGCAATGGTCTTGT	1	Ucp2_-_100498197.23-P2	GCTCAGGCCCGGGCTGGTGG	2	Ucp2_+_100498224.23-P2|Ucp2_-_100498197.23-P2
Fam131a	P2	Fam131a_+_20693347.23-P2	GCGCGGTCACCACCAGGGAG	1	Fam131a_+_20693326.23-P2	GGACAGCTTGTGAGAAGGGG	2	Fam131a_+_20693347.23-P2|Fam131a_+_20693326.23-P2
Patl2	P1P2	Patl2_+_122186136.23-P1P2	GACTGAAAGAATAGCTGTGG	1	Patl2_+_122186181.23-P1P2	GCAAGGGGAAAGGGCGGGAA	2	Patl2_+_122186136.23-P1P2|Patl2_+_122186181.23-P1P2
Krtap27-1	P1P2	Krtap27-1_-_88671642.23-P1P2	GGCTCCTGAATGACTGGCAA	1	Krtap27-1_+_88671664.23-P1P2	GTTTAACTAACTTCAATTAA	2	Krtap27-1_-_88671642.23-P1P2|Krtap27-1_+_88671664.23-P1P2
Nsun6	P1	Nsun6_+_15049245.23-P1	GAGCATGTCAGAGTGGATCT	1	Nsun6_+_15049283.23-P1	GCTTTCTGTTCCGAAGCTGG	2	Nsun6_+_15049245.23-P1|Nsun6_+_15049283.23-P1
Zfp462	P1	Zfp462_-_54948063.23-P1	GGAGTCTGAGGAGCCGAGGA	1	Zfp462_-_54948059.23-P1	GCAGCGAGTCTGAGGAGCCG	2	Zfp462_-_54948063.23-P1|Zfp462_-_54948059.23-P1
Kif20b	P1P2	Kif20b_-_34922406.23-P1P2	GGAAGTGGAATTCTGCAGGT	1	Kif20b_-_34922410.23-P1P2	GTGGAATTCTGCAGGTGGGG	2	Kif20b_-_34922406.23-P1P2|Kif20b_-_34922410.23-P1P2
Ddit4	P1P2	Ddit4_-_59951749.23-P1P2	GGAGCGCTCTGCCTCTCGAA	1	Ddit4_+_59951792.23-P1P2	GAGGTGCGAGAGGGTTCGAA	2	Ddit4_-_59951749.23-P1P2|Ddit4_+_59951792.23-P1P2
Tlr6	P1P2	Tlr6_+_64960067.23-P1P2	GCCAGGCTTAGGACTAGGGT	1	Tlr6_-_64960097.23-P1P2	GGTCCTAAGCCTGGGAACCA	2	Tlr6_+_64960067.23-P1P2|Tlr6_-_64960097.23-P1P2
Flywch2	P1P2	Flywch2_+_23786035.23-P1P2	GGAGGCTGAGGGACCCGCCA	1	Flywch2_+_23786018.23-P1P2	GCACGGCTCCGTCGTCCGAG	2	Flywch2_+_23786035.23-P1P2|Flywch2_+_23786018.23-P1P2
Cd200r2	P1P2	Cd200r2_-_44867121.23-P1P2	GCTGCTCGTTGTCATTGGTT	1	Cd200r2_-_44867116.23-P1P2	GCTGCTCTGCTCGTTGTCAT	2	Cd200r2_-_44867121.23-P1P2|Cd200r2_-_44867116.23-P1P2
Dennd3	P1P2	Dennd3_-_73512614.23-P1P2	GCTGGCAACCAGCCCAAGAG	1	Dennd3_+_73512604.23-P1P2	GAAGCCTCCCCGCCTCTCTT	2	Dennd3_-_73512614.23-P1P2|Dennd3_+_73512604.23-P1P2
Vsx1	P1P2	Vsx1_+_150688985.23-P1P2	GGCCAGAGAGGACTCAACTC	1	Vsx1_+_150688782.23-P1P2	GTCCAACAGCGGAGATCCAG	2	Vsx1_+_150688985.23-P1P2|Vsx1_+_150688782.23-P1P2
Ptprn	P1P2	Ptprn_+_75264121.23-P1P2	GCTCAGAGCCGGGAAGGATG	1	Ptprn_+_75264127.23-P1P2	GAGAGAGCTCAGAGCCGGGA	2	Ptprn_+_75264121.23-P1P2|Ptprn_+_75264127.23-P1P2
Ska3	P1P2	Ska3_+_57826120.23-P1P2	GAGGTCAGCAGTCGGCTCGG	1	Ska3_+_57826123.23-P1P2	GTGGAGGTCAGCAGTCGGCT	2	Ska3_+_57826120.23-P1P2|Ska3_+_57826123.23-P1P2
Shank2	ENSMUST00000105902.1	Shank2_-_144001969.23-ENSMUST00000105902.1	GCCATCCAGAGTGCAGGCTG	1	Shank2_-_144001994.23-ENSMUST00000105902.1	GCTGTAGGGAGCCTTCCTGT	2	Shank2_-_144001969.23-ENSMUST00000105902.1|Shank2_-_144001994.23-ENSMUST00000105902.1
Rnh1	P1P2	Rnh1_-_141172799.23-P1P2	GAGCGACCTCCGGACTGAAG	1	Rnh1_+_141172816.23-P1P2	GCCCCACAGCGAGGACACGA	2	Rnh1_-_141172799.23-P1P2|Rnh1_+_141172816.23-P1P2
Vmn1r51	ENSMUST00000072859.5	Vmn1r51_+_90128501.23-ENSMUST00000072859.5	GGCTCTTTACACACCGAACA	1	Vmn1r51_+_90128544.23-ENSMUST00000072859.5	GGCCATGTGCTTGTATCAGG	2	Vmn1r51_+_90128501.23-ENSMUST00000072859.5|Vmn1r51_+_90128544.23-ENSMUST00000072859.5
Nmt1	P1P2	Nmt1_-_103028577.23-P1P2	GCTCTCGCAACCCAAGATGG	1	Nmt1_+_103028604.23-P1P2	GTCAGTGGCAACGAAGGTGC	2	Nmt1_-_103028577.23-P1P2|Nmt1_+_103028604.23-P1P2
Cltb	P1P2	Cltb_+_54611322.23-P1P2	GAGTGACAGGCAAGCCGGGC	1	Cltb_+_54611326.23-P1P2	GCCGCAGTGACAGGCAAGCC	2	Cltb_+_54611322.23-P1P2|Cltb_+_54611326.23-P1P2
Fbxw10	P1P2	Fbxw10_+_62847148.23-P1P2	GAACATCTGGAGAAACCGTA	1	Fbxw10_+_62847133.23-P1P2	GCGTAAGGCACTGCGATGGA	2	Fbxw10_+_62847148.23-P1P2|Fbxw10_+_62847133.23-P1P2
Olfr194	ENSMUST00000072608.1	Olfr194_+_59120024.23-ENSMUST00000072608.1	GTGTCTGATTTTGTTCTCAA	1	Olfr194_-_59119995.23-ENSMUST00000072608.1	GAGAAGAACAGGAGAAACAG	2	Olfr194_+_59120024.23-ENSMUST00000072608.1|Olfr194_-_59119995.23-ENSMUST00000072608.1
BC021785	P1P2	BC021785_+_39986605.23-P1P2	GTTCTGGTCAGACAGAACAG	1	BC021785_-_39986415.23-P1P2	GGCAGCGTTCAGAACCACAG	2	BC021785_+_39986605.23-P1P2|BC021785_-_39986415.23-P1P2
Ext2	P1P2	Ext2_-_93822520.23-P1P2	GAGGTACCCTGGAGCCAGCG	1	Ext2_-_93822550.23-P1P2	GGCCGGCCTCCAGTTCCCCA	2	Ext2_-_93822520.23-P1P2|Ext2_-_93822550.23-P1P2
Podnl1	P2	Podnl1_-_84126050.23-P2	GTAGTCACAGCAGACACTGG	1	Podnl1_-_84126075.23-P2	GTGAGTGCTGGACAGAAGCT	2	Podnl1_-_84126050.23-P2|Podnl1_-_84126075.23-P2
Met	P1P2	Met_+_17464020.23-P1P2	GGCTCCGCACAGGGTCACCC	1	Met_-_17464077.23-P1P2	GCCGCTGACTCGCTGGAGAA	2	Met_+_17464020.23-P1P2|Met_-_17464077.23-P1P2
Cdc123	P1P2	Cdc123_+_5844918.23-P1P2	GGGAAAGGCGGCTATTGACG	1	Cdc123_+_5844626.23-P1P2	GGAGCGAGTCGAGGGAGGTA	2	Cdc123_+_5844918.23-P1P2|Cdc123_+_5844626.23-P1P2
Slc31a1	P1P2	Slc31a1_+_62360778.23-P1P2	GTGGATCCCCTAGTCCGGTA	1	Slc31a1_-_62360786.23-P1P2	GGCTTGGTAGAAGTCCGTAC	2	Slc31a1_+_62360778.23-P1P2|Slc31a1_-_62360786.23-P1P2
Sdk1	P1P2	Sdk1_+_141241630.23-P1P2	GGCCCCGCAGCGCTCTGTGA	1	Sdk1_+_141241778.23-P1P2	GggAGCGCGCAGACCCGCTG	2	Sdk1_+_141241630.23-P1P2|Sdk1_+_141241778.23-P1P2
Hist1h2bn	P1P2	Hist1h2bn_+_21754120.23-P1P2	GGACTTAGCGGGTTCAGGCA	1	Hist1h2bn_-_21754163.23-P1P2	GCGCTCCCGCCCCGAAGAAG	2	Hist1h2bn_+_21754120.23-P1P2|Hist1h2bn_-_21754163.23-P1P2
Dedd	P1P2	Dedd_-_171329503.23-P1P2	GGGCGCGGATGGATCCAACA	1	Dedd_+_171329520.23-P1P2	Gcgccccgccgcctcactct	2	Dedd_-_171329503.23-P1P2|Dedd_+_171329520.23-P1P2
5730455P16Rik	P1P2	5730455P16Rik_+_80377913.23-P1P2	GTGGAGAGCAGCGAAGAGGG	1	5730455P16Rik_+_80377989.23-P1P2	GGGGACACAGGGCCCCGAGG	2	5730455P16Rik_+_80377913.23-P1P2|5730455P16Rik_+_80377989.23-P1P2
Olfr1465	ENSMUST00000080142.1	Olfr1465_+_13314026.23-ENSMUST00000080142.1	GTCATGAGTGGGCTCCTAAA	1	Olfr1465_-_13314211.23-ENSMUST00000080142.1	GGATTAGAAGTATCATGAAG	2	Olfr1465_+_13314026.23-ENSMUST00000080142.1|Olfr1465_-_13314211.23-ENSMUST00000080142.1
Sult2a7	P1P2	Sult2a7_-_14493008.23-P1P2	GTGGGTTCTACTCCAGGCTT	1	Sult2a7_+_14492998.23-P1P2	GCTGCAGACATGCCCAAGCC	2	Sult2a7_-_14493008.23-P1P2|Sult2a7_+_14492998.23-P1P2
Tm2d3	P1P2	Tm2d3_+_65693510.23-P1P2	GCAGCACGCGGGACAGGTGG	1	Tm2d3_-_65693484.23-P1P2	GCGCGCAGCGACAAAAATGG	2	Tm2d3_+_65693510.23-P1P2|Tm2d3_-_65693484.23-P1P2
Rdh11	P1P2	Rdh11_+_79191782.23-P1P2	GTCGGTGGTGCTGAGATGTT	1	Rdh11_-_79191558.23-P1P2	GCTGGCCGTGCCCACATCCA	2	Rdh11_+_79191782.23-P1P2|Rdh11_-_79191558.23-P1P2
Aff2	P1P2	Aff2_+_69360593.23-P1P2	GCTGCGCTCCGGAGCAGTGG	1	Aff2_+_69360422.23-P1P2	GTGGCGggtggcgacggcag	2	Aff2_+_69360593.23-P1P2|Aff2_+_69360422.23-P1P2
Ang	P1	Ang_-_51096452.23-P1	GAGCTGGACACATTCCCAGT	1	Ang_-_51096455.23-P1	GTGGACACATTCCCAGTCGG	2	Ang_-_51096452.23-P1|Ang_-_51096455.23-P1
Mmp16	P1P2	Mmp16_-_17853361.23-P1P2	GCCCTTCCCGCAGAAACTGG	1	Mmp16_-_17853382.23-P1P2	GGCACCGGCGGCGTAGGAGG	2	Mmp16_-_17853361.23-P1P2|Mmp16_-_17853382.23-P1P2
Spcs3	P1P2	Spcs3_+_54529936.23-P1P2	GGAGCCTGAAGTGCGAGTGT	1	Spcs3_-_54529909.23-P1P2	GGACAGGACGGTGTTCATCG	2	Spcs3_+_54529936.23-P1P2|Spcs3_-_54529909.23-P1P2
Loh12cr1	P1P2	Loh12cr1_-_134641116.23-P1P2	GCGAGCGGCGTGCTTTCCAG	1	Loh12cr1_+_134641082.23-P1P2	GCGCCGCTCGCGTTGACAGG	2	Loh12cr1_-_134641116.23-P1P2|Loh12cr1_+_134641082.23-P1P2
Kank1	P1P2	Kank1_-_25237002.23-P1P2	GCGGCGCTGGAGGTGAGTAG	1	Kank1_-_25237204.23-P1P2	GTCACCGCTGGCGCTCGAGG	2	Kank1_-_25237002.23-P1P2|Kank1_-_25237204.23-P1P2
Slc8a2	P1P2	Slc8a2_+_16130354.23-P1P2	GGCCTCCGCCCgaggagaaa	1	Slc8a2_+_16130377.23-P1P2	GCCCGCTGGGCCCCCGCGGT	2	Slc8a2_+_16130354.23-P1P2|Slc8a2_+_16130377.23-P1P2
Tmc5	ENSMUST00000057320.7	Tmc5_-_118633797.23-ENSMUST00000057320.7	GCTCCTAAGGAGTCCCCCCA	1	Tmc5_-_118633957.23-ENSMUST00000057320.7	GGAAGAACAAGAGTCTTCGT	2	Tmc5_-_118633797.23-ENSMUST00000057320.7|Tmc5_-_118633957.23-ENSMUST00000057320.7
Plscr1	P1P2	Plscr1_-_92250248.23-P1P2	GCTAGAGGATTCAGGAGTGC	1	Plscr1_-_92250297.23-P1P2	GCCCTCTGCGAGGGAAAGCC	2	Plscr1_-_92250248.23-P1P2|Plscr1_-_92250297.23-P1P2
Galm	P1P2	Galm_+_80127734.23-P1P2	GGAGGGCAGCTCTCCAAACA	1	Galm_-_80127880.23-P1P2	GCAGGGGAAAGCCTCAGACG	2	Galm_+_80127734.23-P1P2|Galm_-_80127880.23-P1P2
Lamtor1	P1P2	Lamtor1_-_101906002.23-P1P2	GCCCGGCCCGACCCCGCCAT	1	Lamtor1_+_101906212.23-P1P2	GCCTAGGCAGAAGTAAGACT	2	Lamtor1_-_101906002.23-P1P2|Lamtor1_+_101906212.23-P1P2
Slc23a3	P1P2	Slc23a3_+_75133859.23-P1P2	GCCAAGACGCAATCAAGTCA	1	Slc23a3_-_75133832.23-P1P2	GCCCTCAGATAGAAGTGGAA	2	Slc23a3_+_75133859.23-P1P2|Slc23a3_-_75133832.23-P1P2
Gdf3	P1P2	Gdf3_+_122609948.23-P1P2	GGACCATGCAGCCTTATCAA	1	Gdf3_-_122609982.23-P1P2	GTGCATGGTCGTCTGAGCCA	2	Gdf3_+_122609948.23-P1P2|Gdf3_-_122609982.23-P1P2
Dusp14	P2	Dusp14_-_84068286.23-P2	GGTACCGAGTGTGCCGGTGG	1	Dusp14_-_84068283.23-P2	GCCCGTACCGAGTGTGCCGG	2	Dusp14_-_84068286.23-P2|Dusp14_-_84068283.23-P2
Cyp24a1	P1P2	Cyp24a1_+_170497128.23-P1P2	GAGCTCGGGGAGGCACAAGG	1	Cyp24a1_+_170497138.23-P1P2	GTAAGCCCGGGAGCTCGGGG	2	Cyp24a1_+_170497128.23-P1P2|Cyp24a1_+_170497138.23-P1P2
AI317395	P1P2	AI317395_+_40025133.23-P1P2	GGAGGGACCTCGGAGACTGG	1	AI317395_-_40025099.23-P1P2	GGGCTGCGGAGAGCTACTGG	2	AI317395_+_40025133.23-P1P2|AI317395_-_40025099.23-P1P2
Vmn1r233	ENSMUST00000056339.1	Vmn1r233_+_20994639.23-ENSMUST00000056339.1	GATGCCAGTGAACTGTCTGT	1	Vmn1r233_-_20994657.23-ENSMUST00000056339.1	GACTCCTACAGACAGTTCAC	2	Vmn1r233_+_20994639.23-ENSMUST00000056339.1|Vmn1r233_-_20994657.23-ENSMUST00000056339.1
Evi2b	P1	Evi2b_-_79523685.23-P1	GGATTTGGCTGAGAGAGCAA	1	Evi2b_-_79523731.23-P1	GGGTCTCCAGCGCACTGAGA	2	Evi2b_-_79523685.23-P1|Evi2b_-_79523731.23-P1
Msl3	P2	Msl3_+_168672461.23-P2	GCAGCTCTCGATCTAAAGGG	1	Msl3_+_168672464.23-P2	GACCCAGCTCTCGATCTAAA	2	Msl3_+_168672461.23-P2|Msl3_+_168672464.23-P2
Coa6	P1P2	Coa6_-_126422535.23-P1P2	GGCCGGGGCAGGTCAATCGG	1	Coa6_+_126422611.23-P1P2	GCCTACGTGGGAGAGCGGTG	2	Coa6_-_126422535.23-P1P2|Coa6_+_126422611.23-P1P2
Zfhx4	P1P2	Zfhx4_-_5218703.23-P1P2	GCAAACAGCGAGACCGCGGT	1	Zfhx4_-_5218699.23-P1P2	GCAAGCAAACAGCGAGACCG	2	Zfhx4_-_5218703.23-P1P2|Zfhx4_-_5218699.23-P1P2
Psmg3	P1P2	Psmg3_-_139826831.23-P1P2	GCACCAGCAGCGCCAGAAAG	1	Psmg3_-_139826793.23-P1P2	GCAGTTGGGACCGAAACCCT	2	Psmg3_-_139826831.23-P1P2|Psmg3_-_139826793.23-P1P2
Zfp142	P1P2	Zfp142_+_74587982.23-P1P2	GCTCCCGCCAGCCCACGGGT	1	Zfp142_+_74587961.23-P1P2	GGAGGTGAGAGAGCGGCTGT	2	Zfp142_+_74587982.23-P1P2|Zfp142_+_74587961.23-P1P2
Dis3	P1P2	Dis3_-_99099718.23-P1P2	GGCCGTCAGCTAAGAAACCG	1	Dis3_-_99099697.23-P1P2	GGCCTCGCGGCGTGGGATCC	2	Dis3_-_99099718.23-P1P2|Dis3_-_99099697.23-P1P2
Ifitm1	P1P2	Ifitm1_+_140968456.23-P1P2	GGTACCACCTGGGTAAGTCA	1	Ifitm1_+_140968466.23-P1P2	GcacaACCCAGGTACCACCT	2	Ifitm1_+_140968456.23-P1P2|Ifitm1_+_140968466.23-P1P2
Polr2k	P1P2	Polr2k_-_36174086.23-P1P2	GTCTTCCAGCTGTGGAGGTA	1	Polr2k_+_36174240.23-P1P2	Gtaagccaggctcaaagtca	2	Polr2k_-_36174086.23-P1P2|Polr2k_+_36174240.23-P1P2
Chrm3	ENSMUST00000063093.9	Chrm3_+_9878919.23-ENSMUST00000063093.9	GTGGGTGCACAGTCCCTCAG	1	Chrm3_-_9878928.23-ENSMUST00000063093.9	GAGGGCAGCCCCGCCTCTGA	2	Chrm3_+_9878919.23-ENSMUST00000063093.9|Chrm3_-_9878928.23-ENSMUST00000063093.9
Gata1	P1P2	Gata1_-_7967832.23-P1P2	GGAGTTCAGGGTGATCCCAA	1	Gata1_-_7967844.23-P1P2	GATCCCAAGGGAGTCCTCAC	2	Gata1_-_7967832.23-P1P2|Gata1_-_7967844.23-P1P2
Olfr1477	ENSMUST00000096201.2	Olfr1477_+_13500632.23-ENSMUST00000096201.2	GAAAATAGGAGTAAAACGGA	1	Olfr1477_+_13500851.23-ENSMUST00000096201.2	GATGGTTGTAAGTAGAGCAA	2	Olfr1477_+_13500632.23-ENSMUST00000096201.2|Olfr1477_+_13500851.23-ENSMUST00000096201.2
Csnk2a1	P1P2	Csnk2a1_+_152226599.23-P1P2	GCCATCAGGCATACAAACGA	1	Csnk2a1_+_152226820.23-P1P2	GCTCCCAACCAGAGGCGGGG	2	Csnk2a1_+_152226599.23-P1P2|Csnk2a1_+_152226820.23-P1P2
Minos1	P1P2	Minos1_+_139130954.23-P1P2	GTCCGAGCTGGGCAGAAAGT	1	Minos1_+_139130978.23-P1P2	GTTGCCAGTGAGGAACATGT	2	Minos1_+_139130954.23-P1P2|Minos1_+_139130978.23-P1P2
BC025446	P1P2	BC025446_-_75216754.23-P1P2	GCCCTATTGTGTGCAGAAGG	1	BC025446_-_75216873.23-P1P2	GATGCTGTGGCCAGTCGACT	2	BC025446_-_75216754.23-P1P2|BC025446_-_75216873.23-P1P2
Bcl2l1	P1	Bcl2l1_-_152830428.23-P1	GAGCAAGCAGGTACAACCCC	1	Bcl2l1_-_152830432.23-P1	GAGCAGGTACAACCCCCGGA	2	Bcl2l1_-_152830428.23-P1|Bcl2l1_-_152830432.23-P1
Chd6	P1P2	Chd6_-_161108758.23-P1P2	GAGCGCGCGGCAGCCGGGAG	1	Chd6_-_161108887.23-P1P2	GCAGCCCCGCTCCATTCATA	2	Chd6_-_161108758.23-P1P2|Chd6_-_161108887.23-P1P2
Prr5l	P1P2	Prr5l_+_101797639.23-P1P2	GCTACGGCGGAGAGAAACCT	1	Prr5l_+_101797655.23-P1P2	GAGCCTGACTCTGAGAGCTA	2	Prr5l_+_101797639.23-P1P2|Prr5l_+_101797655.23-P1P2
Slc44a4	P1P2	Slc44a4_-_34914532.23-P1P2	GAGGCTCACGGTAAGGCTAG	1	Slc44a4_-_34914475.23-P1P2	GTCCGTGGCTCCAATCACTC	2	Slc44a4_-_34914532.23-P1P2|Slc44a4_-_34914475.23-P1P2
Wiz	P1	Wiz_-_32364432.23-P1	GACTCGGCACTGGGCGGTGG	1	Wiz_+_32364436.23-P1	GGCGTGCGCCGGAGCCAAGA	2	Wiz_-_32364432.23-P1|Wiz_+_32364436.23-P1
C3ar1	P1P2	C3ar1_+_122856012.23-P1P2	GGCTCGCAGATCATCAGTCC	1	C3ar1_-_122856016.23-P1P2	GGATGGAATCCAAAGGCTCC	2	C3ar1_+_122856012.23-P1P2|C3ar1_-_122856016.23-P1P2
Med13l	P1P2	Med13l_-_118560345.23-P1P2	Gggagaagcgcggccgactg	1	Med13l_+_118560286.23-P1P2	GCTCGCTCTGACAGCAATGG	2	Med13l_-_118560345.23-P1P2|Med13l_+_118560286.23-P1P2
Mme	P2	Mme_-_63296222.23-P2	GTCCGCCCAGGAGTTCTGTT	1	Mme_-_63296268.23-P2	GTGCACCGGGGTTCATTTGG	2	Mme_-_63296222.23-P2|Mme_-_63296268.23-P2
Zfp386	P1P2	Zfp386_+_116047809.23-P1P2	GGATTTCGTAAGGGCCACCG	1	Zfp386_-_116047835.23-P1P2	GGTGGCCCTTACGAAATCAC	2	Zfp386_+_116047809.23-P1P2|Zfp386_-_116047835.23-P1P2
Kif20a	P1P2	Kif20a_+_34624990.23-P1P2	GCCGCGCAGCAAGACTCCTG	1	Kif20a_-_34625016.23-P1P2	GGGAGTCTTGCTGCGCGGGT	2	Kif20a_+_34624990.23-P1P2|Kif20a_-_34625016.23-P1P2
Usp49	P1P2	Usp49_+_47611661.23-P1P2	GCCCATAGCGAAGGATCAAA	1	Usp49_+_47611658.23-P1P2	GATAGCGAAGGATCAAAAGG	2	Usp49_+_47611661.23-P1P2|Usp49_+_47611658.23-P1P2
Fstl3	P2	Fstl3_+_79780619.23-P2	GGAGAGTTGGCGCTACACAG	1	Fstl3_+_79780632.23-P2	GCCTGGACACGCCCGAGAGT	2	Fstl3_+_79780619.23-P2|Fstl3_+_79780632.23-P2
Wbp2	P1P2	Wbp2_+_116086921.23-P1P2	GACCCCAGTGGGAGAGACTA	1	Wbp2_+_116086932.23-P1P2	GCGAGTCTCGGGACCCCAGT	2	Wbp2_+_116086921.23-P1P2|Wbp2_+_116086932.23-P1P2
Gal	P1P2	Gal_-_3414434.23-P1P2	GACTGCACGGCGCAGCTCAG	1	Gal_+_3414456.23-P1P2	GCCTGCCACGGACACGTCGA	2	Gal_-_3414434.23-P1P2|Gal_+_3414456.23-P1P2
F9	P1P2	F9_-_59999499.23-P1P2	GACCGTCATGGCAGAATCCC	1	F9_-_59999487.23-P1P2	GAAGCACCTGAACACCGTCA	2	F9_-_59999499.23-P1P2|F9_-_59999487.23-P1P2
Cobl	P1P2	Cobl_-_12464903.23-P1P2	GGGGGGCGTGCGGAGAGAGA	1	Cobl_-_12464868.23-P1P2	GAGAGGACGGAAGCGACCTG	2	Cobl_-_12464903.23-P1P2|Cobl_-_12464868.23-P1P2
Ctse	P1	Ctse_+_131661981.23-P1	GGGCTTCATTGTGGTCCAAG	1	Ctse_-_131661988.23-P1	GTGAGAGAGAAGCTACCCCT	2	Ctse_+_131661981.23-P1|Ctse_-_131661988.23-P1
Hrnr	P1P2	Hrnr_+_93319774.23-P1P2	GGTTCACCAGAGGAACAGTA	1	Hrnr_+_93319770.23-P1P2	GACCAGAGGAACAGTAGGGA	2	Hrnr_+_93319774.23-P1P2|Hrnr_+_93319770.23-P1P2
Sh2d6	P1P2	Sh2d6_-_72521683.23-P1P2	GAGTCTCACCATGGCAAGGT	1	Sh2d6_-_72521640.23-P1P2	GGGAGTCTCAGCAGGTATAT	2	Sh2d6_-_72521683.23-P1P2|Sh2d6_-_72521640.23-P1P2
1700094D03Rik	P1P2	1700094D03Rik_+_90062806.23-P1P2	GAAGTTTGGGGACACTGGGA	1	1700094D03Rik_-_90062896.23-P1P2	GTAGAAGAGGTATGGAGGGT	2	1700094D03Rik_+_90062806.23-P1P2|1700094D03Rik_-_90062896.23-P1P2
Qrich1	P1P2	Qrich1_-_108517133.23-P1P2	GTGGCGCCCAGGGAGCTGTG	1	Qrich1_-_108517312.23-P1P2	GGCAGGCCCACCCTACACAA	2	Qrich1_-_108517133.23-P1P2|Qrich1_-_108517312.23-P1P2
Tmem202	P1P2	Tmem202_+_59525470.23-P1P2	GagtgttgagaCAAATTCCG	1	Tmem202_+_59525450.23-P1P2	GGGCAGTTAGAAAGTTGAAC	2	Tmem202_+_59525470.23-P1P2|Tmem202_+_59525450.23-P1P2
Kel	P1P2	Kel_+_41704249.23-P1P2	GCCAGGGCCACTGGGACTAG	1	Kel_-_41704277.23-P1P2	GTCCCAGTGGCCCTGGAGAA	2	Kel_+_41704249.23-P1P2|Kel_-_41704277.23-P1P2
Gm17677	P1P2	Gm17677_+_35740952.23-P1P2	GCTCTGGGCAGGATGTGAAA	1	Gm17677_-_35741345.23-P1P2	GGGTATTGTGATAGACTCAG	2	Gm17677_+_35740952.23-P1P2|Gm17677_-_35741345.23-P1P2
Chi3l4	P1P2	Chi3l4_+_106219370.23-P1P2	GCTTACAGAATCTGACAAGG	1	Chi3l4_-_106219010.23-P1P2	GCAATGGAAAGTGGCAATGA	2	Chi3l4_+_106219370.23-P1P2|Chi3l4_-_106219010.23-P1P2
Dlx2	P1P2	Dlx2_+_71546726.23-P1P2	GCAATCGTAAAGCTGCTCGG	1	Dlx2_-_71546697.23-P1P2	GAGAGCGGTCAGACCCGGTA	2	Dlx2_+_71546726.23-P1P2|Dlx2_-_71546697.23-P1P2
Olfr1109	ENSMUST00000099863.1	Olfr1109_+_87093326.23-ENSMUST00000099863.1	GCTTAACAGAAAATCCCGAT	1	Olfr1109_+_87093348.23-ENSMUST00000099863.1	GTGAAGGAATTCATACTCCT	2	Olfr1109_+_87093326.23-ENSMUST00000099863.1|Olfr1109_+_87093348.23-ENSMUST00000099863.1
Zcchc16	P1P2	Zcchc16_-_144689128.23-P1P2	GGTGGTGGCAGAGACCCGAG	1	Zcchc16_+_144688934.23-P1P2	GGCTACAGAGCGGGCAGGAG	2	Zcchc16_-_144689128.23-P1P2|Zcchc16_+_144688934.23-P1P2
Gcgr	P1P2	Gcgr_-_120530767.23-P1P2	GGGCCGAGGCGAGCAGTCGC	1	Gcgr_-_120530923.23-P1P2	GACCTGGGCGCACAGAAGAG	2	Gcgr_-_120530767.23-P1P2|Gcgr_-_120530923.23-P1P2
Padi1	P1P2	Padi1_+_140845728.23-P1P2	GGTGTCCCCAAGGAGATCTG	1	Padi1_-_140845783.23-P1P2	GTAGGAGCGTGCCTTCTGAT	2	Padi1_+_140845728.23-P1P2|Padi1_-_140845783.23-P1P2
9930012K11Rik	P1P2	9930012K11Rik_-_70159430.23-P1P2	GGCGGCACCGGAGTGATCTC	1	9930012K11Rik_+_70159434.23-P1P2	GCAGCACAGCTAGGGACTTG	2	9930012K11Rik_-_70159430.23-P1P2|9930012K11Rik_+_70159434.23-P1P2
Rps8	P1P2	Rps8_-_117156002.23-P1P2	GCATGCGTCGGGAGGCAGGA	1	Rps8_-_117155991.23-P1P2	GGTCGGGCCGAGCATGCGTC	2	Rps8_-_117156002.23-P1P2|Rps8_-_117155991.23-P1P2
Speer2	P1P2	Speer2_-_69863663.23-P1P2	Gtccctctttataaactcct	1	Speer2_+_69863678.23-P1P2	Gcaggatcacccagtgcttc	2	Speer2_-_69863663.23-P1P2|Speer2_+_69863678.23-P1P2
Wipi2	P1P2	Wipi2_-_142629634.23-P1P2	GGTCCCCGCGCAGCGAGAGG	1	Wipi2_-_142629603.23-P1P2	GCAAGAGTGGGGACGGGATG	2	Wipi2_-_142629634.23-P1P2|Wipi2_-_142629603.23-P1P2
Phf21a	P2	Phf21a_+_92185564.23-P2	GTTGCGAGCGTGGTCAaggg	1	Phf21a_+_92185567.23-P2	GCCATTGCGAGCGTGGTCAa	2	Phf21a_+_92185564.23-P2|Phf21a_+_92185567.23-P2
Pmpca	P1P2	Pmpca_-_26389382.23-P1P2	GGCGATGGCGACGGCAGTGT	1	Pmpca_-_26389412.23-P1P2	GCGGCTGCTTCGGGGATCTG	2	Pmpca_-_26389382.23-P1P2|Pmpca_-_26389412.23-P1P2
Qser1	P1P2	Qser1_-_104816919.23-P1P2	GTCGGACGTCAGGAGAGCGG	1	Qser1_-_104816916.23-P1P2	GGGCTCGGACGTCAGGAGAG	2	Qser1_-_104816919.23-P1P2|Qser1_-_104816916.23-P1P2
Tmem30b	P1P2	Tmem30b_+_73546380.23-P1P2	GGAGGCTCGCCGCTGATCCT	1	Tmem30b_-_73546340.23-P1P2	GGCCGTGGCGCTCCAGGTCA	2	Tmem30b_+_73546380.23-P1P2|Tmem30b_-_73546340.23-P1P2
Chd5	P1P2	Chd5_+_152338682.23-P1P2	Gtcccgcagccggccgaggg	1	Chd5_+_152338679.23-P1P2	Gcgcagccggccgagggtgg	2	Chd5_+_152338682.23-P1P2|Chd5_+_152338679.23-P1P2
BC035947	P1P2	BC035947_+_78512094.23-P1P2	GGGCTGTGCGCAGTAGGGTA	1	BC035947_+_78512099.23-P1P2	GCCAGAGGCTGTGCGCAGTA	2	BC035947_+_78512094.23-P1P2|BC035947_+_78512099.23-P1P2
Spag17	P1P2	Spag17_+_99885479.23-P1P2	GTGGGTGCCATGCGAAGGAT	1	Spag17_+_99885476.23-P1P2	GGTGCCATGCGAAGGATGGG	2	Spag17_+_99885479.23-P1P2|Spag17_+_99885476.23-P1P2
Itgam	P1P2	Itgam_-_128062778.23-P1P2	GCTTCTGGTCACAGGTATGT	1	Itgam_-_128062902.23-P1P2	GGTAGGTGGGGAGAGATCAA	2	Itgam_-_128062778.23-P1P2|Itgam_-_128062902.23-P1P2
Csnk1g2	P2	Csnk1g2_-_80629706.23-P2	GGCCAGGGCCCCAGCAAGAT	1	Csnk1g2_-_80629726.23-P2	GGGGGACCCCAAAAAGAACA	2	Csnk1g2_-_80629706.23-P2|Csnk1g2_-_80629726.23-P2
Mrps2	P1P2	Mrps2_+_28468106.23-P1P2	GCGGGTCAGCACGGCCGGAG	1	Mrps2_-_28468353.23-P1P2	GCAGTCAGCGAGCCCCAGGA	2	Mrps2_+_28468106.23-P1P2|Mrps2_-_28468353.23-P1P2
Tjap1	P1P2	Tjap1_+_46282971.23-P1P2	GAGATGGCTGCCTGAAGGAG	1	Tjap1_-_46282983.23-P1P2	GCTGCCGGGGCCTCTCCTTC	2	Tjap1_+_46282971.23-P1P2|Tjap1_-_46282983.23-P1P2
Slc6a1	P1P2	Slc6a1_-_114282820.23-P1P2	GTGCGCGAGCCCAGGAGCCC	1	Slc6a1_-_114282885.23-P1P2	GCCCCGGCCGCAGGTAGGAA	2	Slc6a1_-_114282820.23-P1P2|Slc6a1_-_114282885.23-P1P2
Ccl17	P1P2	Ccl17_-_94810459.23-P1P2	GCAATGCTGGGCACCAAGAC	1	Ccl17_+_94810484.23-P1P2	GCTCATGGTACCAAAAGCTG	2	Ccl17_-_94810459.23-P1P2|Ccl17_+_94810484.23-P1P2
Nsmce4a	P1P2	Nsmce4a_-_130547304.23-P1P2	GTCGCCTTGCAACTTCGGAG	1	Nsmce4a_-_130547250.23-P1P2	GCCGGCCCCGGCCCTCAGAC	2	Nsmce4a_-_130547304.23-P1P2|Nsmce4a_-_130547250.23-P1P2
Prdm4	P1P2	Prdm4_+_85916957.23-P1P2	GCGAGGGTGCGGCCCCGTGA	1	Prdm4_+_85916802.23-P1P2	GCCCAGCGCGGGCCTCAGGT	2	Prdm4_+_85916957.23-P1P2|Prdm4_+_85916802.23-P1P2
Golga7	P1P2	Golga7_+_23257022.23-P1P2	GAGCTGCTGGAGGGCCGAGG	1	Golga7_+_23257031.23-P1P2	GTGGCGCGACAGCTGCTGGA	2	Golga7_+_23257022.23-P1P2|Golga7_+_23257031.23-P1P2
Csnk1a1	P1P2	Csnk1a1_+_61555355.23-P1P2	GGGAAGCCGTCACTCCGCCG	1	Csnk1a1_-_61555354.23-P1P2	GAGCTAGAGTAACAAGATGG	2	Csnk1a1_+_61555355.23-P1P2|Csnk1a1_-_61555354.23-P1P2
Gm15386	P1P2	Gm15386_-_18265105.23-P1P2	GCAGTTTCTTGGACAAGAAA	1	Gm15386_-_18265081.23-P1P2	GAAAAATAGATGAAACTTCA	2	Gm15386_-_18265105.23-P1P2|Gm15386_-_18265081.23-P1P2
Atp6v0a4	P1P2	Atp6v0a4_-_38124538.23-P1P2	GACTTAGTGTGTACTATGAC	1	Atp6v0a4_+_38124549.23-P1P2	GGGGTCAAGGTTCTAGGAGC	2	Atp6v0a4_-_38124538.23-P1P2|Atp6v0a4_+_38124549.23-P1P2
Tas2r114	ENSMUST00000080619.2	Tas2r114_-_131690039.23-ENSMUST00000080619.2	GACTAGTTGAAACTGAAAGG	1	Tas2r114_-_131690036.23-ENSMUST00000080619.2	GCTCACTAGTTGAAACTGAA	2	Tas2r114_-_131690039.23-ENSMUST00000080619.2|Tas2r114_-_131690036.23-ENSMUST00000080619.2
Pml	P1P2	Pml_-_58249649.23-P1P2	GTGTCGACAGGGAGATCCAG	1	Pml_+_58249529.23-P1P2	GGCCCTGCAGAGGTACTACT	2	Pml_-_58249649.23-P1P2|Pml_+_58249529.23-P1P2
Tac2	P1P2	Tac2_+_127725434.23-P1P2	GTGGATAGCTGACAGGATCA	1	Tac2_-_127725469.23-P1P2	GGCTATCCAGCTCCACAGGT	2	Tac2_+_127725434.23-P1P2|Tac2_-_127725469.23-P1P2
9330159F19Rik	P1P2	9330159F19Rik_-_29211726.23-P1P2	GGCGTTTGTCAGGACCACTG	1	9330159F19Rik_-_29211737.23-P1P2	GGACCACTGTGGAAGATGAA	2	9330159F19Rik_-_29211726.23-P1P2|9330159F19Rik_-_29211737.23-P1P2
Spata3	P1P2	Spata3_+_86021977.23-P1P2	GCCTGGCTCCCTCCCTAGGT	1	Spata3_-_86021990.23-P1P2	GGGAGACTGCCTACCTAGGG	2	Spata3_+_86021977.23-P1P2|Spata3_-_86021990.23-P1P2
Chrna1	P1P2	Chrna1_+_73580299.23-P1P2	GAAGCCGCTGGCGGCCACAG	1	Chrna1_-_73580289.23-P1P2	GGAACAGTCGAGAGCTCCAT	2	Chrna1_+_73580299.23-P1P2|Chrna1_-_73580289.23-P1P2
Nfyc	P1	Nfyc_+_120815708.23-P1	GGGAGGCTGCAGGGCTTCAT	1	Nfyc_+_120815725.23-P1	GTGACTGTTAAAGTGGAAGG	2	Nfyc_+_120815708.23-P1|Nfyc_+_120815725.23-P1
Inpp5b	P2	Inpp5b_-_124741916.23-P2	GCCACCGGTGACAGCTCGGG	1	Inpp5b_-_124741920.23-P2	GCGGTGACAGCTCGGGAGGT	2	Inpp5b_-_124741916.23-P2|Inpp5b_-_124741920.23-P2
Olfr1013	ENSMUST00000065626.2	Olfr1013_+_85769859.23-ENSMUST00000065626.2	GACAGGACCTTCTGTATCAC	1	Olfr1013_+_85770008.23-ENSMUST00000065626.2	GGTAGACAGAAGACAATCCA	2	Olfr1013_+_85769859.23-ENSMUST00000065626.2|Olfr1013_+_85770008.23-ENSMUST00000065626.2
Mug2	ENSMUST00000081777.6	Mug2_+_122007020.23-ENSMUST00000081777.6	GAATTTAAGGAGGTTTTTAG	1	Mug2_+_122006998.23-ENSMUST00000081777.6	GAAGGGACTGTAAAGGGAAA	2	Mug2_+_122007020.23-ENSMUST00000081777.6|Mug2_+_122006998.23-ENSMUST00000081777.6
Spats2l	P1P2	Spats2l_+_57774929.23-P1P2	GCTGAGGGAAAGCGGCGGTA	1	Spats2l_-_57774920.23-P1P2	GAGGAATCCAGCCTGCCCAG	2	Spats2l_+_57774929.23-P1P2|Spats2l_-_57774920.23-P1P2
Gpbp1	P1P2	Gpbp1_+_111489821.23-P1P2	GGGACTGAGACTGGTTGTGG	1	Gpbp1_+_111489853.23-P1P2	GAGAACATTGCGGATCGGGT	2	Gpbp1_+_111489821.23-P1P2|Gpbp1_+_111489853.23-P1P2
Cnbp	P1P2	Cnbp_-_87850975.23-P1P2	GAAGGCGACTCGCAAAGCAG	1	Cnbp_-_87850957.23-P1P2	GCTCGGACGAAGAACCAAGA	2	Cnbp_-_87850975.23-P1P2|Cnbp_-_87850957.23-P1P2
Yrdc	P1P2	Yrdc_+_124850866.23-P1P2	GCTCAGGAGGGCGTAGGAGG	1	Yrdc_+_124850808.23-P1P2	GCCCATGCCGGCCGCCACGG	2	Yrdc_+_124850866.23-P1P2|Yrdc_+_124850808.23-P1P2
Mcm9	P1P2	Mcm9_+_53629943.23-P1P2	GCACCCGGAAGAAGCCCCAG	1	Mcm9_-_53629910.23-P1P2	GGAAGGACTTGAGCTTCCCG	2	Mcm9_+_53629943.23-P1P2|Mcm9_-_53629910.23-P1P2
Rhbdl3	P1P2	Rhbdl3_-_80300891.23-P1P2	GAGGCTCGCGCGCAGAGCGG	1	Rhbdl3_-_80300928.23-P1P2	GAGGAGCGCGGGGAGCGGTA	2	Rhbdl3_-_80300891.23-P1P2|Rhbdl3_-_80300928.23-P1P2
Cd209e	P1P2	Cd209e_-_3854243.23-P1P2	GTACCCAGAGAGCCCATCTG	1	Cd209e_+_3854280.23-P1P2	GTAAGCAGGACCAGGCACCA	2	Cd209e_-_3854243.23-P1P2|Cd209e_+_3854280.23-P1P2
Dnajc8	P1P2	Dnajc8_-_132535591.23-P1P2	GTGGTTAGCCGGGAAAATGG	1	Dnajc8_+_132535810.23-P1P2	GACCTCAGTAGCCACAGTGG	2	Dnajc8_-_132535591.23-P1P2|Dnajc8_+_132535810.23-P1P2
Folr4	P2	Folr4_+_14903685.23-P2	GTCTGAAGACAATGCTGAGG	1	Folr4_+_14903711.23-P2	GCAGGAGGGCCCTGCCTTGA	2	Folr4_+_14903685.23-P2|Folr4_+_14903711.23-P2
Acvr2a	P1P2	Acvr2a_-_48814221.23-P1P2	GCACAGCCTGGACCAGAACT	1	Acvr2a_-_48814173.23-P1P2	GGGCCAGGAGACCGAAAACG	2	Acvr2a_-_48814221.23-P1P2|Acvr2a_-_48814173.23-P1P2
Cyp2e1	P1P2	Cyp2e1_+_140763869.23-P1P2	GATCCAGACAAGCAAGGCAA	1	Cyp2e1_-_140763856.23-P1P2	GAGCCCCATCGGCACCATGG	2	Cyp2e1_+_140763869.23-P1P2|Cyp2e1_-_140763856.23-P1P2
Ces2c	P1P2	Ces2c_-_104847117.23-P1P2	GATCTTAGCAGCACAGACTT	1	Ces2c_-_104847140.23-P1P2	GCTGAGAGCTGATCATGACA	2	Ces2c_-_104847117.23-P1P2|Ces2c_-_104847140.23-P1P2
Gosr1	P1P2	Gosr1_-_76763506.23-P1P2	GCCCGGTGGAACCCACTCCG	1	Gosr1_+_76763496.23-P1P2	GTGAGGGCAAGGCCTCGGAG	2	Gosr1_-_76763506.23-P1P2|Gosr1_+_76763496.23-P1P2
Zfp251	P1P2	Zfp251_+_76871372.23-P1P2	GGGCCAGGCTGGGTGTAGGT	1	Zfp251_+_76871357.23-P1P2	GAGGTGGGTGCCTGGTCCAG	2	Zfp251_+_76871372.23-P1P2|Zfp251_+_76871357.23-P1P2
Myf5	P1P2	Myf5_-_107485992.23-P1P2	GAGGGAGACACGCCAGTCCC	1	Myf5_-_107486019.23-P1P2	GGCAGGCCAGCAAATCCAGG	2	Myf5_-_107485992.23-P1P2|Myf5_-_107486019.23-P1P2
Unk	P1P2	Unk_-_116030371.23-P1P2	GTAAAAGGGGAGCGGCGAAG	1	Unk_-_116030358.23-P1P2	GGCAGACTGAATAATAAAAG	2	Unk_-_116030371.23-P1P2|Unk_-_116030358.23-P1P2
Ubxn8	P1P2	Ubxn8_-_33641892.23-P1P2	GGAGCTCCAGACACAAGAGA	1	Ubxn8_+_33641923.23-P1P2	GTCCGCGCCATGGCTTCTCG	2	Ubxn8_-_33641892.23-P1P2|Ubxn8_+_33641923.23-P1P2
Irf8	P1P2	Irf8_-_120736405.23-P1P2	GCGGGCAGCGTGGGAACCGG	1	Irf8_-_120736413.23-P1P2	GGTGGGAACCGGCGGCAGGT	2	Irf8_-_120736405.23-P1P2|Irf8_-_120736413.23-P1P2
Pax7	P1P2	Pax7_+_139832904.23-P1P2	GCCAGCGTGCGCAGGAATGG	1	Pax7_+_139832907.23-P1P2	GTCTCCAGCGTGCGCAGGAA	2	Pax7_+_139832904.23-P1P2|Pax7_+_139832907.23-P1P2
L3mbtl3	P1	L3mbtl3_+_26375938.23-P1	GGTCAGGACTACTCGTGAGA	1	L3mbtl3_+_26375954.23-P1	GCAGCCCTGGACCATTTGTC	2	L3mbtl3_+_26375938.23-P1|L3mbtl3_+_26375954.23-P1
Sntg1	P1P2	Sntg1_-_9299269.23-P1P2	GTGGCCGGGAGCCCCAGACA	1	Sntg1_+_9299205.23-P1P2	GTACAGCCTCTCGGAAACAA	2	Sntg1_-_9299269.23-P1P2|Sntg1_+_9299205.23-P1P2
Rab5b	P1P2	Rab5b_+_128696158.23-P1P2	GGAGCTGATGGAGCCCACAA	1	Rab5b_+_128696199.23-P1P2	GACAGGCTTGGGCCCGACGG	2	Rab5b_+_128696158.23-P1P2|Rab5b_+_128696199.23-P1P2
Olfr390	ENSMUST00000120081.1	Olfr390_-_73783019.23-ENSMUST00000120081.1	GAATATGGGACTAGGATCTC	1	Olfr390_-_73783025.23-ENSMUST00000120081.1	GGGACTAGGATCTCAGGCTG	2	Olfr390_-_73783019.23-ENSMUST00000120081.1|Olfr390_-_73783025.23-ENSMUST00000120081.1
Golm1	P1P2	Golm1_-_59675716.23-P1P2	GTGGCCGCGCTGCATCCCAC	1	Golm1_+_59675709.23-P1P2	GCGCAGGTGAGCTCTCCCGT	2	Golm1_-_59675716.23-P1P2|Golm1_+_59675709.23-P1P2
Ltbp1	ENSMUST00000112514.1	Ltbp1_+_75178810.23-ENSMUST00000112514.1	GGCTCTCTCTCTCTATCCAG	1	Ltbp1_+_75179023.23-ENSMUST00000112514.1	GGGTTACTCACTAGGAGTAG	2	Ltbp1_+_75178810.23-ENSMUST00000112514.1|Ltbp1_+_75179023.23-ENSMUST00000112514.1
Atp4a	P2	Atp4a_+_30717703.23-P2	GGAGTCGCGTGGATCCTCCA	1	Atp4a_+_30717751.23-P2	GCGCTCCAGCACGCGCTCAG	2	Atp4a_+_30717703.23-P2|Atp4a_+_30717751.23-P2
Hmgb3	P1P2	Hmgb3_+_71556063.23-P1P2	GGCGCGGGCGGAAAGTTGTG	1	Hmgb3_-_71556283.23-P1P2	GGCTCGGCGGGCGCCCCCAG	2	Hmgb3_+_71556063.23-P1P2|Hmgb3_-_71556283.23-P1P2
Fbxw14	ENSMUST00000066901.4,ENSMUST00000112041.2	Fbxw14_-_109287252.23-ENSMUST00000066901.4,ENSMUST00000112041.2	GGATTTGAGGTCTTCACAGT	1	Fbxw14_-_109287523.23-ENSMUST00000066901.4,ENSMUST00000112041.2	GTCATGTAGGGTGCACCTAA	2	Fbxw14_-_109287252.23-ENSMUST00000066901.4,ENSMUST00000112041.2|Fbxw14_-_109287523.23-ENSMUST00000066901.4,ENSMUST00000112041.2
Olfr702	ENSMUST00000080899.2	Olfr702_+_106826649.23-ENSMUST00000080899.2	GACAAGCAAGGAAGTATATA	1	Olfr702_-_106826739.23-ENSMUST00000080899.2	GTAGAATAAATTCTAATATA	2	Olfr702_+_106826649.23-ENSMUST00000080899.2|Olfr702_-_106826739.23-ENSMUST00000080899.2
Smndc1	P1P2	Smndc1_-_53390559.23-P1P2	GAGAAAGTCCGCCAGCGAGG	1	Smndc1_-_53390562.23-P1P2	GAAGTCCGCCAGCGAGGGGG	2	Smndc1_-_53390559.23-P1P2|Smndc1_-_53390562.23-P1P2
Arhgap30	P1P2	Arhgap30_-_171389010.23-P1P2	GGAGCTGCACAGGACGAGAA	1	Arhgap30_+_171389071.23-P1P2	GGGCCACACGGAAGTAGATA	2	Arhgap30_-_171389010.23-P1P2|Arhgap30_+_171389071.23-P1P2
A830010M20Rik	P1P2	A830010M20Rik_-_107497850.23-P1P2	GATCAGCAGAAAATTCAAGT	1	A830010M20Rik_-_107497802.23-P1P2	GTCTATGCTGTTCGTCACAC	2	A830010M20Rik_-_107497850.23-P1P2|A830010M20Rik_-_107497802.23-P1P2
Use1	P1P2	Use1_+_71367427.23-P1P2	GCGCCGCGGACCAGAAGGAG	1	Use1_-_71367302.23-P1P2	GGTTGGAGTTGAACCTGGTA	2	Use1_+_71367427.23-P1P2|Use1_-_71367302.23-P1P2
Slc31a2	P1P2	Slc31a2_-_62286508.23-P1P2	GGAGTCCTGAGTAGAGTCCC	1	Slc31a2_+_62286491.23-P1P2	GTCAGCCCGGGACTCTACTC	2	Slc31a2_-_62286508.23-P1P2|Slc31a2_+_62286491.23-P1P2
Fam110a	P1P2	Fam110a_+_151980124.23-P1P2	GTTCTCCCGGAGGGAATCGT	1	Fam110a_-_151980092.23-P1P2	GGGCTACTACGTGTGAAGAC	2	Fam110a_+_151980124.23-P1P2|Fam110a_-_151980092.23-P1P2
Myocd	P1P2	Myocd_+_65269926.23-P1P2	GTGTTCCCGGCCACCCTCAG	1	Myocd_+_65269923.23-P1P2	GTCCCGGCCACCCTCAGAGG	2	Myocd_+_65269926.23-P1P2|Myocd_+_65269923.23-P1P2
Fam136a	P1P2	Fam136a_+_86365947.23-P1P2	GTCGCGCCAGATCACCTCAG	1	Fam136a_+_86365915.23-P1P2	GCTCGTCACCGAGGCCAGGT	2	Fam136a_+_86365947.23-P1P2|Fam136a_+_86365915.23-P1P2
Bpifa5	P1P2	Bpifa5_+_154162668.23-P1P2	GAGTGGTGTAGCAGAGGATT	1	Bpifa5_+_154162685.23-P1P2	GAGCCTCCTGCTACCCAGAG	2	Bpifa5_+_154162668.23-P1P2|Bpifa5_+_154162685.23-P1P2
Gabrd	P1P2	Gabrd_-_155398051.23-P1P2	GCCGCGCGGCGGCACCAGAA	1	Gabrd_-_155398054.23-P1P2	GCGCGGCGGCACCAGAAGGG	2	Gabrd_-_155398051.23-P1P2|Gabrd_-_155398054.23-P1P2
Cpsf7	P1P2	Cpsf7_+_10525313.23-P1P2	GcCCGTTACCGGGAATATGG	1	Cpsf7_-_10525309.23-P1P2	GGCCTAGTCGGGACTCTCCG	2	Cpsf7_+_10525313.23-P1P2|Cpsf7_-_10525309.23-P1P2
Xpa	P1P2	Xpa_+_46196271.23-P1P2	GGAGTAGGGCCGGGTACTTG	1	Xpa_-_46196302.23-P1P2	GCCGGCCCTACTCCATCACC	2	Xpa_+_46196271.23-P1P2|Xpa_-_46196302.23-P1P2
Anxa7	P1P2	Anxa7_-_20479873.23-P1P2	GACCGACGGAAGAACAGCAA	1	Anxa7_-_20479859.23-P1P2	GGAACGAGCTGACTGACCGA	2	Anxa7_-_20479873.23-P1P2|Anxa7_-_20479859.23-P1P2
Dpy19l4	P1P2	Dpy19l4_+_11322073.23-P1P2	GGCGGGGTTTGGATACTCGG	1	Dpy19l4_-_11322045.23-P1P2	GGGAGACCCGAGTGGCCCTA	2	Dpy19l4_+_11322073.23-P1P2|Dpy19l4_-_11322045.23-P1P2
Hsf1	P1P2	Hsf1_-_76477460.23-P1P2	GGAGCGCGCCGGTCGCAAGA	1	Hsf1_+_76477430.23-P1P2	GGACCGGCGCGCTCTCGCTA	2	Hsf1_-_76477460.23-P1P2|Hsf1_+_76477430.23-P1P2
Wnt4	P1P2	Wnt4_-_137277565.23-P1P2	GGGCGCGGCCGGCTGCTCGG	1	Wnt4_+_137277725.23-P1P2	GCTCGCGGCGGCCGAGAACA	2	Wnt4_-_137277565.23-P1P2|Wnt4_+_137277725.23-P1P2
Olfr656	ENSMUST00000098172.2	Olfr656_+_104617689.23-ENSMUST00000098172.2	GGATCCAAGTCCGTGTGATT	1	Olfr656_+_104617678.23-ENSMUST00000098172.2	GGTGTGATTAGGAGACTCCA	2	Olfr656_+_104617689.23-ENSMUST00000098172.2|Olfr656_+_104617678.23-ENSMUST00000098172.2
Ttc13	P1P2	Ttc13_+_124721942.23-P1P2	GAGATGGCACCTGCCGGCTG	1	Ttc13_+_124721958.23-P1P2	GCCTGCGCCGTGCGGGAAGA	2	Ttc13_+_124721942.23-P1P2|Ttc13_+_124721958.23-P1P2
Pacsin1	P1	Pacsin1_+_27655921.23-P1	GTCAAGCCAAGAGCATCCGG	1	Pacsin1_-_27655765.23-P1	GTGCTCCGGCGCCCAGGTAG	2	Pacsin1_+_27655921.23-P1|Pacsin1_-_27655765.23-P1
Msl1	P1P2	Msl1_-_98795582.23-P1P2	GTCTgcggcgaaggcgacgg	1	Msl1_-_98795579.23-P1P2	GGCCTCTgcggcgaaggcga	2	Msl1_-_98795582.23-P1P2|Msl1_-_98795579.23-P1P2
Nxf7	P1P2	Nxf7_-_135598590.23-P1P2	GGACTGGCATAGGAGCCCAC	1	Nxf7_+_135598561.23-P1P2	GCTCCTATGCCAGTCCACTT	2	Nxf7_-_135598590.23-P1P2|Nxf7_+_135598561.23-P1P2
Tmc3	P1P2	Tmc3_+_83585144.23-P1P2	GGTCCTGGTAGAGATAACAC	1	Tmc3_+_83585159.23-P1P2	GCCCAAGAAGCAGGGAGTCC	2	Tmc3_+_83585144.23-P1P2|Tmc3_+_83585159.23-P1P2
Trim21	P1P2	Trim21_+_102565387.23-P1P2	GAAAGCTGAGGACCCTGGTT	1	Trim21_-_102565397.23-P1P2	GAGTCTCACTCACCTAACCA	2	Trim21_+_102565387.23-P1P2|Trim21_-_102565397.23-P1P2
Nrip3	P1P2	Nrip3_+_109781506.23-P1P2	GGGTTGAAGGTGCTTGGCAG	1	Nrip3_+_109781519.23-P1P2	GTCCAGGAGCTCGAGGTTGA	2	Nrip3_+_109781506.23-P1P2|Nrip3_+_109781519.23-P1P2
Sult2a1	P1P2	Sult2a1_+_13837364.23-P1P2	GAATCCTAAGAGAACCTACA	1	Sult2a1_-_13837382.23-P1P2	GACTCCTTGTAGGTTCTCTT	2	Sult2a1_+_13837364.23-P1P2|Sult2a1_-_13837382.23-P1P2
Vmn2r80	ENSMUST00000165834.2	Vmn2r80_+_79149137.23-ENSMUST00000165834.2	GAAACAAAATTAGAGAACTT	1	Vmn2r80_+_79149004.23-ENSMUST00000165834.2	GAATAATTATCCGTGTCCAT	2	Vmn2r80_+_79149137.23-ENSMUST00000165834.2|Vmn2r80_+_79149004.23-ENSMUST00000165834.2
Rhox1	ENSMUST00000115210.1	Rhox1_+_37222226.23-ENSMUST00000115210.1	Gaccccatggtggtcacaag	1	Rhox1_+_37222103.23-ENSMUST00000115210.1	Gacactggtgaggcatagta	2	Rhox1_+_37222226.23-ENSMUST00000115210.1|Rhox1_+_37222103.23-ENSMUST00000115210.1
Olfr669	ENSMUST00000098164.1	Olfr669_+_104938759.23-ENSMUST00000098164.1	GAAGAGGGCATTGGGGACAG	1	Olfr669_+_104938645.23-ENSMUST00000098164.1	GAGGCCAAGGTTGCCTACTA	2	Olfr669_+_104938759.23-ENSMUST00000098164.1|Olfr669_+_104938645.23-ENSMUST00000098164.1
Tmem70	P1P2	Tmem70_-_16665455.23-P1P2	GAGCCAGAGCGGCTCCGGAG	1	Tmem70_+_16665286.23-P1P2	GTGCTGCGAGTTGGAGAAGG	2	Tmem70_-_16665455.23-P1P2|Tmem70_+_16665286.23-P1P2
Mrpl30	P1P2	Mrpl30_+_37890581.23-P1P2	GCTCCCACGACCGCACTCAC	1	Mrpl30_-_37890609.23-P1P2	GGTGCGGTCGTGGGAGCTAG	2	Mrpl30_+_37890581.23-P1P2|Mrpl30_-_37890609.23-P1P2
Prpf4	P1P2	Prpf4_+_62408868.23-P1P2	GCTCGTGAGGAGGCCATGCC	1	Prpf4_+_62408881.23-P1P2	GACCGTGGAGGAGGCTCGTG	2	Prpf4_+_62408868.23-P1P2|Prpf4_+_62408881.23-P1P2
Cul7	P1P2	Cul7_+_46650644.23-P1P2	GAGGGACGCGCGGAACACGA	1	Cul7_+_46650641.23-P1P2	GGACGCGCGGAACACGATGG	2	Cul7_+_46650644.23-P1P2|Cul7_+_46650641.23-P1P2
Adam24	P1P2	Adam24_+_40675096.23-P1P2	GAGAAGTAGTGATAATATCT	1	Adam24_-_40675138.23-P1P2	GTCCTGGTAAGTCACTCAAG	2	Adam24_+_40675096.23-P1P2|Adam24_-_40675138.23-P1P2
Asb18	P1P2	Asb18_-_90014558.23-P1P2	GAGCTGAGGGGGTAATCTGG	1	Asb18_+_90014589.23-P1P2	GAGAAGGCTGGCCCTGCACA	2	Asb18_-_90014558.23-P1P2|Asb18_+_90014589.23-P1P2
Ethe1	P1P2	Ethe1_-_24587551.23-P1P2	GTCGGACCTGCACCTCCCAG	1	Ethe1_-_24587572.23-P1P2	GGGCGCTGGGACGCCGTTGG	2	Ethe1_-_24587551.23-P1P2|Ethe1_-_24587572.23-P1P2
Zfp369	P1P2	Zfp369_+_65278890.23-P1P2	GGATAGGAGTTGTCCCCGAC	1	Zfp369_-_65278829.23-P1P2	GGACCAGCGAGCCGACTCAG	2	Zfp369_+_65278890.23-P1P2|Zfp369_-_65278829.23-P1P2
Rbms1	ENSMUST00000028347.6	Rbms1_-_60963169.23-ENSMUST00000028347.6	GATACAAGTGGAAAGTACGG	1	Rbms1_-_60963232.23-ENSMUST00000028347.6	GGTGCGCCCGATAGCGAGAG	2	Rbms1_-_60963169.23-ENSMUST00000028347.6|Rbms1_-_60963232.23-ENSMUST00000028347.6
Gm13103	P1P2	Gm13103_+_143846521.23-P1P2	GACCATAATCAGACAGAGTT	1	Gm13103_-_143846512.23-P1P2	GGTCTCAGTCTCTTGGAGCT	2	Gm13103_+_143846521.23-P1P2|Gm13103_-_143846512.23-P1P2
Fam168a	P1P2	Fam168a_+_100706681.23-P1P2	GCCGCGGAGAAACCCGACAG	1	Fam168a_+_100706648.23-P1P2	GGCTCGGCTGCAGGCAAGAG	2	Fam168a_+_100706681.23-P1P2|Fam168a_+_100706648.23-P1P2
2022-03-02	P1P2	March2_-_33718631.23-P1P2	GcggcccggcccgTCAGCAG	1	March2_+_33718443.23-P1P2	GTACTCGAGCGGGACAGATA	2	March2_-_33718631.23-P1P2|March2_+_33718443.23-P1P2
Apol7e	P1P2	Apol7e_-_77699273.23-P1P2	GTATTGCAATTGGGAAAGGG	1	Apol7e_-_77699307.23-P1P2	GGTGTTTGATGTCTAAGAAC	2	Apol7e_-_77699273.23-P1P2|Apol7e_-_77699307.23-P1P2
Arhgap23	P1P2	Arhgap23_+_97415624.23-P1P2	GACGCGGCGGGATCCCGACC	1	Arhgap23_-_97415803.23-P1P2	GGAACAGCTGCGCTAGGCAA	2	Arhgap23_+_97415624.23-P1P2|Arhgap23_-_97415803.23-P1P2
Zfp385b	ENSMUST00000090766.5	Zfp385b_-_77719525.23-ENSMUST00000090766.5	GGCACTGAGCCCTGGACCGG	1	Zfp385b_+_77719697.23-ENSMUST00000090766.5	GCCGGGGCTTTGAAGAAAAG	2	Zfp385b_-_77719525.23-ENSMUST00000090766.5|Zfp385b_+_77719697.23-ENSMUST00000090766.5
Ccdc11	P1P2	Ccdc11_+_74283147.23-P1P2	GAGGAAACTAGAAAGCACGG	1	Ccdc11_-_74283137.23-P1P2	GCAACCAGCACTCTGCGTCT	2	Ccdc11_+_74283147.23-P1P2|Ccdc11_-_74283137.23-P1P2
Enox2	P1P2	Enox2_+_49288202.23-P1P2	GGGTTGGGAAGACAGTTGTG	1	Enox2_+_49288217.23-P1P2	GTAGTAGAAGGTGCACGGTT	2	Enox2_+_49288202.23-P1P2|Enox2_+_49288217.23-P1P2
Nkx2-4	P1P2	Nkx2-4_+_147085421.23-P1P2	GCGCTGCCGCCGGGCCGAAG	1	Nkx2-4_-_147085449.23-P1P2	GGGCCCGGCGGCAGCGCCAG	2	Nkx2-4_+_147085421.23-P1P2|Nkx2-4_-_147085449.23-P1P2
Dhx33	P1P2	Dhx33_+_71004446.23-P1P2	GGCACGTGGCGAGAAAGGGG	1	Dhx33_+_71004449.23-P1P2	GCCTGCACGTGGCGAGAAAG	2	Dhx33_+_71004446.23-P1P2|Dhx33_+_71004449.23-P1P2
Map2	P1	Map2_+_66175349.23-P1	GAGAGGCCGTAGGGAAGCGG	1	Map2_+_66175341.23-P1	GTAGGGAAGCGGAGGTAGAG	2	Map2_+_66175349.23-P1|Map2_+_66175341.23-P1
Nono	P1P2	Nono_-_101429705.23-P1P2	GGGTCGCGCGCTCTTTTCTC	1	Nono_+_101429919.23-P1P2	GCGCTCTGGCCCCCATGGGT	2	Nono_-_101429705.23-P1P2|Nono_+_101429919.23-P1P2
Sub1	P1P2	Sub1_+_11995973.23-P1P2	GAGGCGAGCGAGCGAGGCAG	1	Sub1_-_11995788.23-P1P2	GTCGGCTCGGCTCCCCAGAG	2	Sub1_+_11995973.23-P1P2|Sub1_-_11995788.23-P1P2
Lrdd	P1P2	Lrdd_+_141443957.23-P1P2	GCAGCGTGGCAGGTACTCAA	1	Lrdd_+_141443953.23-P1P2	GGTGGCAGGTACTCAATGGG	2	Lrdd_+_141443957.23-P1P2|Lrdd_+_141443953.23-P1P2
Casp9	P1P2	Casp9_+_141793852.23-P1P2	GTGCCGGTCCGCCTCGTCCA	1	Casp9_+_141794068.23-P1P2	GAAGGGCAGGAGCTCCGTAG	2	Casp9_+_141793852.23-P1P2|Casp9_+_141794068.23-P1P2
Ggta1	P1P2	Ggta1_+_35461189.23-P1P2	GGCGCTCTCAGGCTCTGGGT	1	Ggta1_+_35461183.23-P1P2	GTCAGGCTCTGGGTAGGCAA	2	Ggta1_+_35461189.23-P1P2|Ggta1_+_35461183.23-P1P2
Jmjd6	P1P2	Jmjd6_+_116843353.23-P1P2	GGCCCAACCCAAAGCTCCGG	1	Jmjd6_+_116843294.23-P1P2	GGGCGCCGGGCCGGAGCGAA	2	Jmjd6_+_116843353.23-P1P2|Jmjd6_+_116843294.23-P1P2
Ing1	P2	Ing1_-_11556508.23-P2	GTTTCCACGTTGGACAAGTG	1	Ing1_-_11556516.23-P2	GTTGGACAAGTGCGGCGAGG	2	Ing1_-_11556508.23-P2|Ing1_-_11556516.23-P2
Atp6v1a	P1P2	Atp6v1a_+_44138990.23-P1P2	GGAGCCTCTGGGTCCCGTCT	1	Atp6v1a_-_44138768.23-P1P2	GCTCAACCCAGGGAAAAGGT	2	Atp6v1a_+_44138990.23-P1P2|Atp6v1a_-_44138768.23-P1P2
Tsfm	P1P2	Tsfm_+_127030763.23-P1P2	GCGGTCGCTGCGCTTCTTCC	1	Tsfm_-_127030749.23-P1P2	GGGCGCGCGCGCTCACCGAG	2	Tsfm_+_127030763.23-P1P2|Tsfm_-_127030749.23-P1P2
Fam98c	P1P2	Fam98c_-_29156171.23-P1P2	GGCTACCATGGCCCCATCCA	1	Fam98c_+_29156128.23-P1P2	GGGGTGACCTTCTGACACTG	2	Fam98c_-_29156171.23-P1P2|Fam98c_+_29156128.23-P1P2
Chtf18	P1P2	Chtf18_+_25727369.23-P1P2	GGCGGCGCGGGAAGTTCTGA	1	Chtf18_+_25727321.23-P1P2	GGGCTCCATGGAAGACTACG	2	Chtf18_+_25727369.23-P1P2|Chtf18_+_25727321.23-P1P2
4930571K23Rik	P1P2	4930571K23Rik_-_125369070.23-P1P2	GCCACCAAGGCGGAAAACAG	1	4930571K23Rik_-_125369060.23-P1P2	GCTGCCCCCCGCCACCAAGG	2	4930571K23Rik_-_125369070.23-P1P2|4930571K23Rik_-_125369060.23-P1P2
Gm5615	P1P2	Gm5615_-_36541826.23-P1P2	GCCTCCGCAAAGCAGATAAA	1	Gm5615_-_36541876.23-P1P2	GTTTGTCACCGGATTCATGT	2	Gm5615_-_36541826.23-P1P2|Gm5615_-_36541876.23-P1P2
Ccdc87	P1P2	Ccdc87_-_4839499.23-P1P2	GAAGATGGAACCACACAGTC	1	Ccdc87_-_4839484.23-P1P2	GCGGAACCACCTGGTAAAGA	2	Ccdc87_-_4839499.23-P1P2|Ccdc87_-_4839484.23-P1P2
Pnpla7	P1P2	Pnpla7_-_24976332.23-P1P2	GAGGTAGGTAGACCAGACAT	1	Pnpla7_-_24976076.23-P1P2	GCCACGTGAGGGCTGTTTAC	2	Pnpla7_-_24976332.23-P1P2|Pnpla7_-_24976076.23-P1P2
Fank1	P1P2	Fank1_-_133776910.23-P1P2	GACGAAGACAGGCGTTAGGA	1	Fank1_-_133776924.23-P1P2	GTAGGAGGGCGGCGCCGCCA	2	Fank1_-_133776910.23-P1P2|Fank1_-_133776924.23-P1P2
Crygc	P1P2	Crygc_+_65073495.23-P1P2	GGGTCAGCCAGCCATGGGGA	1	Crygc_-_65073506.23-P1P2	GGTTCTGCTCACCTTCCCCA	2	Crygc_+_65073495.23-P1P2|Crygc_-_65073506.23-P1P2
Gm10696	ENSMUST00000167916.1	Gm10696_+_94176186.23-ENSMUST00000167916.1	GGGAGAGAAATATCAAAGTA	1	Gm10696_+_94176181.23-ENSMUST00000167916.1	GGAAATATCAAAGTATGGAG	2	Gm10696_+_94176186.23-ENSMUST00000167916.1|Gm10696_+_94176181.23-ENSMUST00000167916.1
BC067074	ENSMUST00000078163.7	BC067074_-_113342626.23-ENSMUST00000078163.7	GGTGTTCTGAGGATCGAGTG	1	BC067074_-_113342629.23-ENSMUST00000078163.7	GTTCTGAGGATCGAGTGAGG	2	BC067074_-_113342626.23-ENSMUST00000078163.7|BC067074_-_113342629.23-ENSMUST00000078163.7
Maged1	P1P2	Maged1_+_94541979.23-P1P2	GCTGGACGCGGAGAGAGTGC	1	Maged1_-_94541959.23-P1P2	GGACTCAAGAGGATCGGGAA	2	Maged1_+_94541979.23-P1P2|Maged1_-_94541959.23-P1P2
E330009J07Rik	P1P2	E330009J07Rik_-_40436075.23-P1P2	GTCCTGCGGCACAGAGACCG	1	E330009J07Rik_+_40436121.23-P1P2	GGCTCCGCCTCGCCTCGCCA	2	E330009J07Rik_-_40436075.23-P1P2|E330009J07Rik_+_40436121.23-P1P2
AU041133	P1P2	AU041133_+_82128022.23-P1P2	GTCACTGCGCCCAACATGGA	1	AU041133_+_82128026.23-P1P2	GAGGGTCACTGCGCCCAACA	2	AU041133_+_82128022.23-P1P2|AU041133_+_82128026.23-P1P2
Aim2	ENSMUST00000147604.1	Aim2_-_173350917.23-ENSMUST00000147604.1	GTGCTGTGTCAATATCAAGT	1	Aim2_+_173351242.23-ENSMUST00000147604.1	GAAGCTGAGGAGCCCCCAAG	2	Aim2_-_173350917.23-ENSMUST00000147604.1|Aim2_+_173351242.23-ENSMUST00000147604.1
Gm10639	P1P2	Gm10639_+_78289908.23-P1P2	GTAAGGTAAATTCTTACCCA	1	Gm10639_+_78290251.23-P1P2	GCCAAAAGAAGGAATAGTGG	2	Gm10639_+_78289908.23-P1P2|Gm10639_+_78290251.23-P1P2
Aldh3b2	P1P2	Aldh3b2_-_3972522.23-P1P2	GTGACCCCACCTAGAAGGAT	1	Aldh3b2_-_3972490.23-P1P2	GGGCGCTGCACTGCCAGATA	2	Aldh3b2_-_3972522.23-P1P2|Aldh3b2_-_3972490.23-P1P2
P2ry1	P1P2	P2ry1_-_61002858.23-P1P2	GGGACTGTGAGCGGGGTACA	1	P2ry1_+_61002830.23-P1P2	GCCCCGCTCACAGTCCATGA	2	P2ry1_-_61002858.23-P1P2|P2ry1_+_61002830.23-P1P2
Aldh1a1	P1P2	Aldh1a1_-_20602205.23-P1P2	GAGTTAGTGGCCTGATTCAG	1	Aldh1a1_+_20602042.23-P1P2	GATCTTCAAGTCGGCCAGTG	2	Aldh1a1_-_20602205.23-P1P2|Aldh1a1_+_20602042.23-P1P2
Olfr1262	ENSMUST00000111508.1	Olfr1262_-_90000187.23-ENSMUST00000111508.1	GACAGAAGAATCCAAACAAA	1	Olfr1262_-_90000351.23-ENSMUST00000111508.1	GACATTGTTCCCAGACTCTT	2	Olfr1262_-_90000187.23-ENSMUST00000111508.1|Olfr1262_-_90000351.23-ENSMUST00000111508.1
Foxn3	ENSMUST00000085108.1	Foxn3_-_99450071.23-ENSMUST00000085108.1	GATCGCTCCAGAAAGGACAA	1	Foxn3_-_99450064.23-ENSMUST00000085108.1	GGGTCAGCATCGCTCCAGAA	2	Foxn3_-_99450071.23-ENSMUST00000085108.1|Foxn3_-_99450064.23-ENSMUST00000085108.1
Zfp524	P1P2	Zfp524_+_5015742.23-P1P2	GAGCGGCGCGGGGACATTGG	1	Zfp524_+_5015563.23-P1P2	GACCCGGGCCCCCCGCCTCT	2	Zfp524_+_5015742.23-P1P2|Zfp524_+_5015563.23-P1P2
Galnt14	P1P2	Galnt14_+_73710336.23-P1P2	GGCGCACAGCAGCATCGCAG	1	Galnt14_+_73710366.23-P1P2	GTCGCGGCAGCAGCGGGCAA	2	Galnt14_+_73710336.23-P1P2|Galnt14_+_73710366.23-P1P2
Gyk	P1P2	Gyk_-_85776566.23-P1P2	GTCTCCGGGGTGACTGTGGA	1	Gyk_-_85776540.23-P1P2	GCAGAGCAGAGAGCTTAACA	2	Gyk_-_85776566.23-P1P2|Gyk_-_85776540.23-P1P2
Tmed7	P1P2	Tmed7_-_46597476.23-P1P2	GGGCAGTGGGCAGGGAGACC	1	Tmed7_-_46597463.23-P1P2	GGGAAGACCCGAGGGGCAGT	2	Tmed7_-_46597476.23-P1P2|Tmed7_-_46597463.23-P1P2
Trap1a	P1P2	Trap1a_+_139333888.23-P1P2	GGAGTAGAGTCGCAAGCTAG	1	Trap1a_+_139334058.23-P1P2	GAGACCAGCCACCCTAGATA	2	Trap1a_+_139333888.23-P1P2|Trap1a_+_139334058.23-P1P2
Dmkn	P1P2	Dmkn_-_30763776.23-P1P2	GCTGGAAAGCAGGGAAGTCT	1	Dmkn_-_30763980.23-P1P2	GGCCCTATGTCTGGGTGGTG	2	Dmkn_-_30763776.23-P1P2|Dmkn_-_30763980.23-P1P2
Adamts20	P1P2	Adamts20_+_94404266.23-P1P2	GGCAGCGCGCGATGAGGCAG	1	Adamts20_+_94404272.23-P1P2	GAGGCGGGCAGCGCGCGATG	2	Adamts20_+_94404266.23-P1P2|Adamts20_+_94404272.23-P1P2
Zfp939	P1P2	Zfp939_-_39449530.23-P1P2	GTACCCACCCACCACCATCG	1	Zfp939_+_39449519.23-P1P2	GCAGATCCCAACCCCGATGG	2	Zfp939_-_39449530.23-P1P2|Zfp939_+_39449519.23-P1P2
Ms4a15	P1P2	Ms4a15_+_10993160.23-P1P2	GTGTGAATGTGGGAGCGCAG	1	Ms4a15_-_10993110.23-P1P2	GCTTTCTGGAAGGACAATGG	2	Ms4a15_+_10993160.23-P1P2|Ms4a15_-_10993110.23-P1P2
Dbn1	P1P2	Dbn1_-_55488018.23-P1P2	GCGACCGACACCGGAGGGAG	1	Dbn1_-_55488013.23-P1P2	GCGGACCGACCGACACCGGA	2	Dbn1_-_55488018.23-P1P2|Dbn1_-_55488013.23-P1P2
Tnfrsf25	P1P2	Tnfrsf25_-_152116111.23-P1P2	GCTGCTGCGGGGCTGCGTGG	1	Tnfrsf25_-_152116081.23-P1P2	GCAGGCGGTACAGACCGCAA	2	Tnfrsf25_-_152116111.23-P1P2|Tnfrsf25_-_152116081.23-P1P2
Lce3b	P1P2	Lce3b_+_92933010.23-P1P2	GGGATACTCACTAGATTCAA	1	Lce3b_-_92933036.23-P1P2	GGAATCTAGTGAGTATCCAG	2	Lce3b_+_92933010.23-P1P2|Lce3b_-_92933036.23-P1P2
Mpp1	P1P2	Mpp1_-_75130934.23-P1P2	GACGAGCTAGACTAAGGCGG	1	Mpp1_-_75130940.23-P1P2	GTAGACTAAGGCGGCGGAGG	2	Mpp1_-_75130934.23-P1P2|Mpp1_-_75130940.23-P1P2
Prkcg	P1P2	Prkcg_+_3303557.23-P1P2	GAAGGAGCCGCAGGCACGGG	1	Prkcg_+_3303560.23-P1P2	GATCAAGGAGCCGCAGGCAC	2	Prkcg_+_3303557.23-P1P2|Prkcg_+_3303560.23-P1P2
Tstd2	P1P2	Tstd2_+_46138393.23-P1P2	GGTGAAGGGAGACCCAGGAA	1	Tstd2_+_46138407.23-P1P2	GGCAGCGCCAAGTTGGTGAA	2	Tstd2_+_46138393.23-P1P2|Tstd2_+_46138407.23-P1P2
Gca	P1P2	Gca_+_62664342.23-P1P2	GCAAGTGCGTGCGACAGGTG	1	Gca_+_62664372.23-P1P2	GGCGTCAGCGCGGCTTAGAG	2	Gca_+_62664342.23-P1P2|Gca_+_62664372.23-P1P2
Defb19	P1P2	Defb19_-_152580263.23-P1P2	GCTCATGGTGGCACCACCCA	1	Defb19_-_152580269.23-P1P2	GGTGGCACCACCCAGGGTGG	2	Defb19_-_152580263.23-P1P2|Defb19_-_152580269.23-P1P2
Cdk8	P1P2	Cdk8_-_146231262.23-P1P2	GcctcTCTCGGAGGAGCTAC	1	Cdk8_-_146231273.23-P1P2	GGGAGCTACCGGCTGTTGTG	2	Cdk8_-_146231262.23-P1P2|Cdk8_-_146231273.23-P1P2
Spag11a	P1P2	Spag11a_-_19158112.23-P1P2	GACAGAGTTGGACCACTCTG	1	Spag11a_+_19157910.23-P1P2	GGCTCTCTGTGCAGGAAAGC	2	Spag11a_-_19158112.23-P1P2|Spag11a_+_19157910.23-P1P2
Rho	P1P2	Rho_-_115931934.23-P1P2	GGCGCTGTGGGAGCCGTCAG	1	Rho_-_115931983.23-P1P2	GTGTCTACGAAGAGCCCGTG	2	Rho_-_115931934.23-P1P2|Rho_-_115931983.23-P1P2
Birc7	P1P2	Birc7_-_180929100.23-P1P2	GAGCCTCTGGGAAGGACTAG	1	Birc7_+_180929035.23-P1P2	GCAAGCTGCTAGATGCTCAG	2	Birc7_-_180929100.23-P1P2|Birc7_+_180929035.23-P1P2
Ppef2	P1P2	Ppef2_-_92256278.23-P1P2	GCCGTGGGCAGCAACACCCT	1	Ppef2_-_92256263.23-P1P2	GATGTCCACCTTCAAGCCGT	2	Ppef2_-_92256278.23-P1P2|Ppef2_-_92256263.23-P1P2
Atg3	P1P2	Atg3_-_45158825.23-P1P2	GGAGGAAGGGGAAGCCGGAA	1	Atg3_-_45158775.23-P1P2	GAGTCACGTGAGGCCTTAGG	2	Atg3_-_45158825.23-P1P2|Atg3_-_45158775.23-P1P2
Mcm3ap	P1P2	Mcm3ap_-_76468981.23-P1P2	GGAGGCTGCACGCAGACTGT	1	Mcm3ap_+_76469050.23-P1P2	GCAACTCGGCAAAGACACAA	2	Mcm3ap_-_76468981.23-P1P2|Mcm3ap_+_76469050.23-P1P2
1500009L16Rik	P1P2	1500009L16Rik_-_83722979.23-P1P2	GCCAGAGCGCGGCTTCCCTG	1	1500009L16Rik_-_83722992.23-P1P2	GTCCCTGCGGGTGGCGCGAT	2	1500009L16Rik_-_83722979.23-P1P2|1500009L16Rik_-_83722992.23-P1P2
Sele	P1P2	Sele_-_164048289.23-P1P2	GGCAGGAGCAATACACCTAA	1	Sele_+_164048282.23-P1P2	GTTCTGGCGTTGGATCCCTT	2	Sele_-_164048289.23-P1P2|Sele_+_164048282.23-P1P2
Zbtbd6	P1P2	Zbtbd6_-_79451897.23-P1P2	GTCGGCTACGCGATAAAGGG	1	Zbtbd6_-_79451894.23-P1P2	GCCGTCGGCTACGCGATAAA	2	Zbtbd6_-_79451897.23-P1P2|Zbtbd6_-_79451894.23-P1P2
2010001E11Rik	P1P2	2010001E11Rik_+_39926866.23-P1P2	GGGCTGTGGCCCCGACGACT	1	2010001E11Rik_+_39926898.23-P1P2	GGCCAAGCTGGAGCTAGAAC	2	2010001E11Rik_+_39926866.23-P1P2|2010001E11Rik_+_39926898.23-P1P2
Camkv	P1P2	Camkv_-_107935938.23-P1P2	GGGAGGTTCTGGAGTCGAAG	1	Camkv_-_107935921.23-P1P2	GGAGCGACTGGCGATGCTGG	2	Camkv_-_107935938.23-P1P2|Camkv_-_107935921.23-P1P2
Xcr1	P1P2	Xcr1_+_123862002.23-P1P2	GCTACGTGAAACTCTAGCAC	1	Xcr1_+_123861940.23-P1P2	GCTGACATGGACTCAGAGTC	2	Xcr1_+_123862002.23-P1P2|Xcr1_+_123861940.23-P1P2
Plcb1	P1P2	Plcb1_-_134786218.23-P1P2	GTGAATGGTGCGCTTCCAGG	1	Plcb1_-_134786242.23-P1P2	GGCCGAGCAGGATCCAGCGG	2	Plcb1_-_134786218.23-P1P2|Plcb1_-_134786242.23-P1P2
Chchd1	P1P2	Chchd1_+_20703082.23-P1P2	GCCAGGCGGCCGCGTAGACT	1	Chchd1_-_20703095.23-P1P2	GTGGCGACGCCCAGTCTACG	2	Chchd1_+_20703082.23-P1P2|Chchd1_-_20703095.23-P1P2
Pld1	P1	Pld1_-_27984226.23-P1	GCTGTTTATGTGGATTTGTA	1	Pld1_+_27984157.23-P1	GGCTTTGGCAGGCTCCCTAA	2	Pld1_-_27984226.23-P1|Pld1_+_27984157.23-P1
Snurf	P1P2	Snurf_+_60005096.23-P1P2	GGACTAGCGCAGAGAGGAGA	1	Snurf_+_60005102.23-P1P2	GCGGCAAGACTAGCGCAGAG	2	Snurf_+_60005096.23-P1P2|Snurf_+_60005102.23-P1P2
Stard10	P1P2	Stard10_-_101321167.23-P1P2	GAGCCCCGAGCCTAGCGGGA	1	Stard10_-_101321352.23-P1P2	GccggcAGAGAAGCCCGCAC	2	Stard10_-_101321167.23-P1P2|Stard10_-_101321352.23-P1P2
Epha1	P1P2	Epha1_-_42373245.23-P1P2	GCCTGGGACCACGGCCCCTA	1	Epha1_+_42373237.23-P1P2	GCGACCTGGCCCAGCCGTAG	2	Epha1_-_42373245.23-P1P2|Epha1_+_42373237.23-P1P2
Cyp2u1	P1P2	Cyp2u1_+_131303140.23-P1P2	GCTGCAGCGGAGCTAGATGC	1	Cyp2u1_-_131303134.23-P1P2	GCCGAGCGAGGACATGTCCC	2	Cyp2u1_+_131303140.23-P1P2|Cyp2u1_-_131303134.23-P1P2
Folr4	P1	Folr4_+_14902505.23-P1	GGCAGGTCATGGCACAGTGG	1	Folr4_+_14902516.23-P1	GTTCTCTCTGTGGCAGGTCA	2	Folr4_+_14902505.23-P1|Folr4_+_14902516.23-P1
Igfbp3	P1P2	Igfbp3_+_7213904.23-P1P2	GCCCAGATGCGAGCTTAGAG	1	Igfbp3_-_7213847.23-P1P2	GTGGAGCACGCGGGATGAGG	2	Igfbp3_+_7213904.23-P1P2|Igfbp3_-_7213847.23-P1P2
Col24a1	P1P2	Col24a1_-_145292784.23-P1P2	GGAACCGCAAGTGAACTCCA	1	Col24a1_+_145292758.23-P1P2	GGAGTTCACTTGCGGTTCAA	2	Col24a1_-_145292784.23-P1P2|Col24a1_+_145292758.23-P1P2
Sun3	P2	Sun3_+_9048945.23-P2	GGGAGCTGGCAGGTCCACTG	1	Sun3_+_9048959.23-P2	GACGCCTCACGCCCAGGAGC	2	Sun3_+_9048945.23-P2|Sun3_+_9048959.23-P2
Bclaf1	P1P2	Bclaf1_+_20312503.23-P1P2	GGAGAGGAAGACCATAGAGG	1	Bclaf1_-_20312502.23-P1P2	GGAGCCGAGCTAGCGCGACG	2	Bclaf1_+_20312503.23-P1P2|Bclaf1_-_20312502.23-P1P2
Fhod3	P1P2	Fhod3_-_24709509.23-P1P2	GGAGCCCGCGAGCCTGCTAG	1	Fhod3_-_24709512.23-P1P2	GCCCGCGAGCCTGCTAGCGG	2	Fhod3_-_24709509.23-P1P2|Fhod3_-_24709512.23-P1P2
Cops7a	P1P2	Cops7a_-_124965396.23-P1P2	GCCGGACCGACTGCAACCGA	1	Cops7a_+_124965443.23-P1P2	GGAGCCGCTGCCGGAGGTGA	2	Cops7a_-_124965396.23-P1P2|Cops7a_+_124965443.23-P1P2
4921530L21Rik	P1P2	4921530L21Rik_-_95881277.23-P1P2	GGAACAGAGCAATGTAAGTC	1	4921530L21Rik_+_95881303.23-P1P2	GGCATTTACTTAGCGTTCTT	2	4921530L21Rik_-_95881277.23-P1P2|4921530L21Rik_+_95881303.23-P1P2
Wbscr27	P1P2	Wbscr27_+_134932387.23-P1P2	GGCGCGGAACCCCCTTCTCC	1	Wbscr27_+_134932403.23-P1P2	GAGGCTCAGAACTCACCGCG	2	Wbscr27_+_134932387.23-P1P2|Wbscr27_+_134932403.23-P1P2
Medag	P1P2	Medag_-_149411833.23-P1P2	GTGCCTGCAGCGCTCCACAA	1	Medag_-_149411849.23-P1P2	GCAAGGGTGGGCAACCTTCA	2	Medag_-_149411833.23-P1P2|Medag_-_149411849.23-P1P2
Olfr15	ENSMUST00000080917.1	Olfr15_-_3839003.23-ENSMUST00000080917.1	GGGACAGCAACAGCTCCTCT	1	Olfr15_-_3838983.23-ENSMUST00000080917.1	GAGGCAGCCGGTGATGGAGG	2	Olfr15_-_3839003.23-ENSMUST00000080917.1|Olfr15_-_3838983.23-ENSMUST00000080917.1
Grb2	P1	Grb2_+_115708568.23-P1	GCTGGCGAGGAGCGGAAGCT	1	Grb2_+_115708534.23-P1	GTTCTGCGATCgggcggcgg	2	Grb2_+_115708568.23-P1|Grb2_+_115708534.23-P1
Olfr1535	ENSMUST00000068163.1	Olfr1535_+_21556003.23-ENSMUST00000068163.1	GCTGCAATGAACAGAGCTAA	1	Olfr1535_-_21556036.23-ENSMUST00000068163.1	GTTCATTGCAGTCTACCTGT	2	Olfr1535_+_21556003.23-ENSMUST00000068163.1|Olfr1535_-_21556036.23-ENSMUST00000068163.1
Pfn3	P1P2	Pfn3_-_55415210.23-P1P2	GCTTGTGCTTGCATTAGGGG	1	Pfn3_-_55415242.23-P1P2	GCATTCAGAGCTAAGAACAC	2	Pfn3_-_55415210.23-P1P2|Pfn3_-_55415242.23-P1P2
Dexi	P1P2	Dexi_+_10543074.23-P1P2	GTGGGAAGCCCAGAGCGACT	1	Dexi_+_10543011.23-P1P2	GGTGCCTGAGGAACGCCTCG	2	Dexi_+_10543074.23-P1P2|Dexi_+_10543011.23-P1P2
Cdhr1	P1P2	Cdhr1_-_37098231.23-P1P2	GGGGCGCTGGATGAGAGCAG	1	Cdhr1_-_37098212.23-P1P2	GGGACCTCGGAGCATGCCCT	2	Cdhr1_-_37098231.23-P1P2|Cdhr1_-_37098212.23-P1P2
Ctsh	P1P2	Ctsh_+_90054564.23-P1P2	GAGGCCCCAGCGCACAGCAG	1	Ctsh_+_90054607.23-P1P2	GGCGTTCACGGTCAGCTCGG	2	Ctsh_+_90054564.23-P1P2|Ctsh_+_90054607.23-P1P2
Hsd3b6	P1P2	Hsd3b6_-_98814418.23-P1P2	Ggccagtcaactcagatgag	1	Hsd3b6_+_98814398.23-P1P2	Gccctctcatctgagttgac	2	Hsd3b6_-_98814418.23-P1P2|Hsd3b6_+_98814398.23-P1P2
Scnm1	P1P2	Scnm1_+_95133920.23-P1P2	GAGCAGCGAAGTAGGCGTAG	1	Scnm1_+_95133928.23-P1P2	GCCTAAAGGAGCAGCGAAGT	2	Scnm1_+_95133920.23-P1P2|Scnm1_+_95133928.23-P1P2
Tcte1	P1P2	Tcte1_-_45523468.23-P1P2	GAGGAGGGCGCCAACGCCCA	1	Tcte1_-_45523471.23-P1P2	GAGGGCGCCAACGCCCAGGG	2	Tcte1_-_45523468.23-P1P2|Tcte1_-_45523471.23-P1P2
Sorcs2	P1P2	Sorcs2_-_36398063.23-P1P2	GCATGGTCGCTGGTAGGTAA	1	Sorcs2_-_36398088.23-P1P2	GGGCGGTGCGGACGACACCG	2	Sorcs2_-_36398063.23-P1P2|Sorcs2_-_36398088.23-P1P2
Pyhin1	P1P2	Pyhin1_-_173630811.23-P1P2	GAGATGCACTCTGCCGGGAG	1	Pyhin1_+_173630802.23-P1P2	GAAACAGGAAGTTCCCCTCC	2	Pyhin1_-_173630811.23-P1P2|Pyhin1_+_173630802.23-P1P2
Itm2a	P1P2	Itm2a_-_107403362.23-P1P2	GCAGCAGCGAGCTCAGGTCT	1	Itm2a_-_107403340.23-P1P2	GTCCTCTCCCAGTCTTCCAC	2	Itm2a_-_107403362.23-P1P2|Itm2a_-_107403340.23-P1P2
Klhl17	P1P2	Klhl17_-_156234791.23-P1P2	GAAGCCGCGACCCTGATGGA	1	Klhl17_-_156234797.23-P1P2	GCGACCCTGATGGACGGATT	2	Klhl17_-_156234791.23-P1P2|Klhl17_-_156234797.23-P1P2
D630045J12Rik	P1P2	D630045J12Rik_-_38254110.23-P1P2	GGAGACTGGGCGCCTAGCAC	1	D630045J12Rik_-_38254097.23-P1P2	GGTCCGCTGCGGCGGAGACT	2	D630045J12Rik_-_38254110.23-P1P2|D630045J12Rik_-_38254097.23-P1P2
Papln	P1P2	Papln_-_83763691.23-P1P2	GCCCAGGCTGGGCACCGATA	1	Papln_-_83763702.23-P1P2	GCACCGATAAGGCGGCTCCA	2	Papln_-_83763691.23-P1P2|Papln_-_83763702.23-P1P2
Rimklb	P1P2	Rimklb_+_122486255.23-P1P2	Gcgcgaggccgtgagaaagt	1	Rimklb_+_122486490.23-P1P2	GgcgcggcgccTCGGTCTGG	2	Rimklb_+_122486255.23-P1P2|Rimklb_+_122486490.23-P1P2
Ssu2	P1P2	Ssu2_+_112387977.23-P1P2	GATGGACAGGGACCCGAGTG	1	Ssu2_+_112387974.23-P1P2	GGACAGGGACCCGAGTGAGG	2	Ssu2_+_112387977.23-P1P2|Ssu2_+_112387974.23-P1P2
Atg4a	P1P2	Atg4a_+_140956914.23-P1P2	GTCCACCGGCAACTTGACTA	1	Atg4a_-_140956983.23-P1P2	GTGGAGTCAGGTAATGGGAG	2	Atg4a_+_140956914.23-P1P2|Atg4a_-_140956983.23-P1P2
Ascc1	P1P2	Ascc1_+_60002866.23-P1P2	GGCGTAGGAAGAGACCCTGG	1	Ascc1_+_60002881.23-P1P2	GCAGGACTAACTGGGAGCGT	2	Ascc1_+_60002866.23-P1P2|Ascc1_+_60002881.23-P1P2
Pabpc1	P1P2	Pabpc1_+_36608938.23-P1P2	GGCGGTTAGTGCTGAGAGTG	1	Pabpc1_+_36608956.23-P1P2	GTGCTTCCCCTTCTCCCCGG	2	Pabpc1_+_36608938.23-P1P2|Pabpc1_+_36608956.23-P1P2
Plg	P1P2	Plg_-_12378670.23-P1P2	GCTGTTGGCCAGTCCCAACA	1	Plg_-_12378679.23-P1P2	GAGTCCCAACATGGACCATA	2	Plg_-_12378670.23-P1P2|Plg_-_12378679.23-P1P2
Cand1	P1P2	Cand1_+_119240034.23-P1P2	GGAGCGAGTGCGGAGGGAGT	1	Cand1_+_119240041.23-P1P2	GCCCTAGGGAGCGAGTGCGG	2	Cand1_+_119240034.23-P1P2|Cand1_+_119240041.23-P1P2
Mthfd2	P1P2	Mthfd2_+_83317525.23-P1P2	GCGGGCACCGGCGCGAGCCA	1	Mthfd2_+_83317549.23-P1P2	GCCGCGCGCGCGCTTCTCTC	2	Mthfd2_+_83317525.23-P1P2|Mthfd2_+_83317549.23-P1P2
Lhfpl2	P2	Lhfpl2_+_94174127.23-P2	GAGGTCCGGGAAGGAAGTCT	1	Lhfpl2_+_94174136.23-P2	GGTAGCGAGGAGGTCCGGGA	2	Lhfpl2_+_94174127.23-P2|Lhfpl2_+_94174136.23-P2
Nme2	P1P2	Nme2_-_93955901.23-P1P2	GGAACGACCACCAGCCGGCG	1	Nme2_-_93955838.23-P1P2	GAGCCTTACCGAAAGCCGGT	2	Nme2_-_93955901.23-P1P2|Nme2_-_93955838.23-P1P2
Stat3	P1P2	Stat3_+_100939379.23-P1P2	GAGCCCTAACCGGATCGCTG	1	Stat3_-_100939371.23-P1P2	GGCGGTCAGGCGACACCGAG	2	Stat3_+_100939379.23-P1P2|Stat3_-_100939371.23-P1P2
Cmtm2a	P2	Cmtm2a_+_104292839.23-P2	GGAGAGGTCCTCAGAAGTAG	1	Cmtm2a_+_104292981.23-P2	GGGACACGACCCCAAAAAGG	2	Cmtm2a_+_104292839.23-P2|Cmtm2a_+_104292981.23-P2
Slc37a2	P1P2	Slc37a2_-_37255394.23-P1P2	GTCGAAGCTGAGACTATGGA	1	Slc37a2_+_37255351.23-P1P2	GGTGCCGGCGCCTCAAGATG	2	Slc37a2_-_37255394.23-P1P2|Slc37a2_+_37255351.23-P1P2
Tprg	P1P2	Tprg_-_25286893.23-P1P2	GAAGTGCGGCTGGGTATCAG	1	Tprg_-_25286884.23-P1P2	GCAGCTACAGAAGTGCGGCT	2	Tprg_-_25286893.23-P1P2|Tprg_-_25286884.23-P1P2
Srms	P1P2	Srms_+_181213090.23-P1P2	GGAAGAGTATGTAGACTAGG	1	Srms_+_181213076.23-P1P2	GCTAGGAGGAGCAGCCCGTG	2	Srms_+_181213090.23-P1P2|Srms_+_181213076.23-P1P2
Spdyb	P1P2	Spdyb_+_143225870.23-P1P2	GGAGGAGAGACACTCCATGG	1	Spdyb_-_143225812.23-P1P2	GGCGTCCCTTCCCCCATCTA	2	Spdyb_+_143225870.23-P1P2|Spdyb_-_143225812.23-P1P2
Olfr90	ENSMUST00000070808.2	Olfr90_+_37086233.23-ENSMUST00000070808.2	GGTGTCCTGAGAAGTAGTCA	1	Olfr90_-_37086185.23-ENSMUST00000070808.2	GGTCTCTGTATCTAGTTGGA	2	Olfr90_+_37086233.23-ENSMUST00000070808.2|Olfr90_-_37086185.23-ENSMUST00000070808.2
1700034E13Rik	P1P2	1700034E13Rik_-_52646255.23-P1P2	GCAGCCATGCCCGAATATCA	1	1700034E13Rik_-_52646276.23-P1P2	GGCAGCATCCTAGGATCCTG	2	1700034E13Rik_-_52646255.23-P1P2|1700034E13Rik_-_52646276.23-P1P2
Nckap1l	P1	Nckap1l_-_103453832.23-P1	GGCCAGGCTGAGAATATTTG	1	Nckap1l_+_103453859.23-P1	GATGATGGCCACCGAGAGAG	2	Nckap1l_-_103453832.23-P1|Nckap1l_+_103453859.23-P1
Tmem54	P1P2	Tmem54_-_129105595.23-P1P2	GGCCGGGCTGGGCGACTGAG	1	Tmem54_-_129105602.23-P1P2	GTGGGCGACTGAGGGGTGCA	2	Tmem54_-_129105595.23-P1P2|Tmem54_-_129105602.23-P1P2
Sp3	P1P2	Sp3_-_72979013.23-P1P2	GTAGCGGCCAGCAGAGCGAG	1	Sp3_+_72978975.23-P1P2	GCGCTACCTGCAGCAAGATA	2	Sp3_-_72979013.23-P1P2|Sp3_+_72978975.23-P1P2
Clec4g	P1	Clec4g_+_3720589.23-P1	GCAATTGAAGAGGTCTCCAG	1	Clec4g_+_3720585.23-P1	GTGAAGAGGTCTCCAGAGGT	2	Clec4g_+_3720589.23-P1|Clec4g_+_3720585.23-P1
Olfr507	ENSMUST00000080014.1	Olfr507_+_108621800.23-ENSMUST00000080014.1	GGATACCCATGGGACAGTGT	1	Olfr507_+_108621810.23-ENSMUST00000080014.1	GCATCCTTCAGGATACCCAT	2	Olfr507_+_108621800.23-ENSMUST00000080014.1|Olfr507_+_108621810.23-ENSMUST00000080014.1
Itgal	P1P2	Itgal_+_127296388.23-P1P2	GCTGGCAACCTAGACCCGGG	1	Itgal_+_127296391.23-P1P2	GTTGCTGGCAACCTAGACCC	2	Itgal_+_127296388.23-P1P2|Itgal_+_127296391.23-P1P2
Dym	P1P2	Dym_+_75018750.23-P1P2	GGACGCGTCTGGGGACCGAA	1	Dym_+_75018826.23-P1P2	GCACCGCGTTCCAGCCCCAG	2	Dym_+_75018750.23-P1P2|Dym_+_75018826.23-P1P2
Nptxr	P1P2	Nptxr_+_79804706.23-P1P2	GCTCAGAGCGGCGGCAGTAG	1	Nptxr_-_79804673.23-P1P2	Gggagcgcgggagccggaac	2	Nptxr_+_79804706.23-P1P2|Nptxr_-_79804673.23-P1P2
Ptpn13	P1P2	Ptpn13_+_103425261.23-P1P2	GGGCAGCGGCGCGGAGACCT	1	Ptpn13_+_103425303.23-P1P2	GCCAGGAGGCTGAGGCGGAC	2	Ptpn13_+_103425261.23-P1P2|Ptpn13_+_103425303.23-P1P2
Art4	P1P2	Art4_-_136857596.23-P1P2	GCTGTCTAGTCGGCATGCAG	1	Art4_-_136857542.23-P1P2	GAGATGTGCGCGGCACAGAA	2	Art4_-_136857596.23-P1P2|Art4_-_136857542.23-P1P2
Gm94	P1P2	Gm94_+_43792838.23-P1P2	GATACCCAAGACAACAGGAA	1	Gm94_-_43792795.23-P1P2	GGCCCGGCATGTCAGGATTA	2	Gm94_+_43792838.23-P1P2|Gm94_-_43792795.23-P1P2
Cacna1d	P1P2	Cacna1d_+_30353465.23-P1P2	GCGCGGTCCCGAGCCAgcgg	1	Cacna1d_+_30353492.23-P1P2	GCGTCCCCGGATGTGAGCTC	2	Cacna1d_+_30353465.23-P1P2|Cacna1d_+_30353492.23-P1P2
Fbxl12	P1P2	Fbxl12_+_20644691.23-P1P2	GGCTAAGAATGGATTTACAG	1	Fbxl12_-_20644782.23-P1P2	GGGAACCCGGAAGCACCTAA	2	Fbxl12_+_20644691.23-P1P2|Fbxl12_-_20644782.23-P1P2
Thnsl2	P1P2	Thnsl2_-_71144297.23-P1P2	GCTGGGCGAGGTTACCGTAG	1	Thnsl2_-_71144330.23-P1P2	GCTGGAGACCCGAGTCCAGT	2	Thnsl2_-_71144297.23-P1P2|Thnsl2_-_71144330.23-P1P2
Zfp239	P1P2	Zfp239_+_117863132.23-P1P2	GAGCTCTGCTCACCTCTTGT	1	Zfp239_-_117863126.23-P1P2	GGTCCTGCGTTACCAGGTGT	2	Zfp239_+_117863132.23-P1P2|Zfp239_-_117863126.23-P1P2
Rpl14	P1P2	Rpl14_+_120571584.23-P1P2	GCCCGCCCGGGGCAGAAGAC	1	Rpl14_+_120571554.23-P1P2	GCGGCCGCACTCGGAGCTCT	2	Rpl14_+_120571584.23-P1P2|Rpl14_+_120571554.23-P1P2
Zfp451	P1P2	Zfp451_+_33814535.23-P1P2	GAAGCGGCGCTGGAAGCTAG	1	Zfp451_+_33814420.23-P1P2	GCCGGGCGAGAGGGAAGTCg	2	Zfp451_+_33814535.23-P1P2|Zfp451_+_33814420.23-P1P2
Olfr1459	ENSMUST00000078299.3	Olfr1459_-_13146720.23-ENSMUST00000078299.3	GAAGCAAAATGAGTACAATA	1	Olfr1459_+_13146400.23-ENSMUST00000078299.3	GTCATAGCTGGAATCCTCAC	2	Olfr1459_-_13146720.23-ENSMUST00000078299.3|Olfr1459_+_13146400.23-ENSMUST00000078299.3
Fastk	P1P2	Fastk_-_24445152.23-P1P2	GCCCGCGGCCTCCTCATCAG	1	Fastk_+_24445181.23-P1P2	GGCGTCTGGGGGCGATCCGG	2	Fastk_-_24445152.23-P1P2|Fastk_+_24445181.23-P1P2
Mdga1	P1P2	Mdga1_+_29888558.23-P1P2	GGCACAGCGAAGCCCAAGTT	1	Mdga1_+_29888548.23-P1P2	GGCCCAAGTTAGGGAGCGAG	2	Mdga1_+_29888558.23-P1P2|Mdga1_+_29888548.23-P1P2
Igsf9	P1P2	Igsf9_-_172482266.23-P1P2	GTGCTGTGCAGAGCAGGTGA	1	Igsf9_-_172482227.23-P1P2	GGGGTCCGCCCCCTATTGTG	2	Igsf9_-_172482266.23-P1P2|Igsf9_-_172482227.23-P1P2
Plcxd2	P1P2	Plcxd2_+_46010286.23-P1P2	GACCAGCCCGGGGAAACCCA	1	Plcxd2_+_46010176.23-P1P2	GGTGTGAGTAGCTCCGGGTG	2	Plcxd2_+_46010286.23-P1P2|Plcxd2_+_46010176.23-P1P2
Vmn2r22	ENSMUST00000170808.1	Vmn2r22_-_123650296.23-ENSMUST00000170808.1	GAGTGGAAGTGTAGCGGTAG	1	Vmn2r22_-_123650290.23-ENSMUST00000170808.1	GCTGGACAGTGGAAGTGTAG	2	Vmn2r22_-_123650296.23-ENSMUST00000170808.1|Vmn2r22_-_123650290.23-ENSMUST00000170808.1
Bdkrb2	P1P2	Bdkrb2_-_105563165.23-P1P2	GCTCAGGGGAGTGGATAGTA	1	Bdkrb2_+_105563190.23-P1P2	GTCCCTCGGTCCAGGTTCAG	2	Bdkrb2_-_105563165.23-P1P2|Bdkrb2_+_105563190.23-P1P2
Ttc26	P1P2	Ttc26_+_38381762.23-P1P2	Gaggagggaagagagcatcg	1	Ttc26_-_38381569.23-P1P2	GTGCAGACTATCTGCAGCGG	2	Ttc26_+_38381762.23-P1P2|Ttc26_-_38381569.23-P1P2
Stfa1	P1P2	Stfa1_-_36277208.23-P1P2	GGCATCAAGATGAGTCTTGG	1	Stfa1_-_36277111.23-P1P2	GACACTAGAGGAGGAGCTTT	2	Stfa1_-_36277208.23-P1P2|Stfa1_-_36277111.23-P1P2
Olfr340	ENSMUST00000072854.1	Olfr340_+_36452624.23-ENSMUST00000072854.1	GTCGAATGGGGAGTCCCAAG	1	Olfr340_+_36453028.23-ENSMUST00000072854.1	GTTGGCAGTAGATAAAGTCC	2	Olfr340_+_36452624.23-ENSMUST00000072854.1|Olfr340_+_36453028.23-ENSMUST00000072854.1
Olfr53	ENSMUST00000084456.3	Olfr53_-_140646466.23-ENSMUST00000084456.3	GGTCAGTGACCTCTATAAAA	1	Olfr53_+_140646488.23-ENSMUST00000084456.3	GCTGCAAGCAGCAAGTCTTT	2	Olfr53_-_140646466.23-ENSMUST00000084456.3|Olfr53_+_140646488.23-ENSMUST00000084456.3
2810403A07Rik	P1P2	2810403A07Rik_+_88685844.23-P1P2	GGCGCTCCCTGCGGACATGG	1	2810403A07Rik_-_88685860.23-P1P2	GGCAGGCCGCCATGTCCGCA	2	2810403A07Rik_+_88685844.23-P1P2|2810403A07Rik_-_88685860.23-P1P2
Tex19.2	P1P2	Tex19.2_-_121118277.23-P1P2	GCACCGAGCGAGGACCAACA	1	Tex19.2_+_121118135.23-P1P2	GTGGGCCGGGTGAGCACGGT	2	Tex19.2_-_121118277.23-P1P2|Tex19.2_+_121118135.23-P1P2
Pthlh	P1P2	Pthlh_-_147263793.23-P1P2	GGGCAGCACTCTGGGTCGTG	1	Pthlh_+_147263855.23-P1P2	GCAAGTGGCTGTGCACCCAG	2	Pthlh_-_147263793.23-P1P2|Pthlh_+_147263855.23-P1P2
Morf4l2	P2	Morf4l2_-_136743630.23-P2	GTCTCCGATGCAGGCGCCTA	1	Morf4l2_-_136743672.23-P2	GCGGCTCAAGGTGTCTCTCC	2	Morf4l2_-_136743630.23-P2|Morf4l2_-_136743672.23-P2
Ptpn3	P1P2	Ptpn3_+_57300349.23-P1P2	GTCAGACGGCGGCCAGGTCG	1	Ptpn3_+_57300360.23-P1P2	GACTGGGCATGCTCAGACGG	2	Ptpn3_+_57300349.23-P1P2|Ptpn3_+_57300360.23-P1P2
Ctbp1	P1P2	Ctbp1_-_33274784.23-P1P2	GCGCGCGCGGCCTTACCCAG	1	Ctbp1_+_33274934.23-P1P2	Gtggcggctcggcacggcgg	2	Ctbp1_-_33274784.23-P1P2|Ctbp1_+_33274934.23-P1P2
Tas2r105	ENSMUST00000053652.4	Tas2r105_-_131687436.23-ENSMUST00000053652.4	GTTCAACAGTTGCAATGGAA	1	Tas2r105_-_131687439.23-ENSMUST00000053652.4	GAACAGTTGCAATGGAAAGG	2	Tas2r105_-_131687436.23-ENSMUST00000053652.4|Tas2r105_-_131687439.23-ENSMUST00000053652.4
Ceacam3	P1P2	Ceacam3_-_17150323.23-P1P2	GGGCCACCTAGCTCAAGAGG	1	Ceacam3_-_17150320.23-P1P2	GAGAGGCCACCTAGCTCAAG	2	Ceacam3_-_17150323.23-P1P2|Ceacam3_-_17150320.23-P1P2
Tph1	P1	Tph1_+_46667284.23-P1	GGAAGACTCCCAGCAAGGAC	1	Tph1_-_46667250.23-P1	GCGAAGAGCAGAGCCCTGAG	2	Tph1_+_46667284.23-P1|Tph1_-_46667250.23-P1
Hdac8	P1P2	Hdac8_+_102505141.23-P1P2	GCACCGCTGGGGCTGAACAG	1	Hdac8_-_102505098.23-P1P2	GCCGTCCGCGAGCCAAAGTC	2	Hdac8_+_102505141.23-P1P2|Hdac8_-_102505098.23-P1P2
Padi2	P2	Padi2_-_140924351.23-P2	GGACGCAGATCGGGATGGAG	1	Padi2_-_140924346.23-P2	GATGTGGACGCAGATCGGGA	2	Padi2_-_140924351.23-P2|Padi2_-_140924346.23-P2
Olfr804	ENSMUST00000077312.2	Olfr804_+_129704932.23-ENSMUST00000077312.2	GAACCACAATTTGCAACTGT	1	Olfr804_+_129705107.23-ENSMUST00000077312.2	GCAATGGCTGTCAAGAATTT	2	Olfr804_+_129704932.23-ENSMUST00000077312.2|Olfr804_+_129705107.23-ENSMUST00000077312.2
2022-03-09	P1P2	March9_+_127060099.23-P1P2	GCCGAGAGGACGACGATGGG	1	March9_+_127060121.23-P1P2	GGGCAGTCGGAGCGGGACTG	2	March9_+_127060099.23-P1P2|March9_+_127060121.23-P1P2
Ctcf	P1P2	Ctcf_+_105637023.23-P1P2	GGCCTCGAGGGTAGAGACAA	1	Ctcf_-_105636607.23-P1P2	GCGCGGAGCTGCTTCTTTGG	2	Ctcf_+_105637023.23-P1P2|Ctcf_-_105636607.23-P1P2
Naip5	P1P2	Naip5_-_100247104.23-P1P2	GGCTCCTTCCCTGTAGAGAA	1	Naip5_-_100247109.23-P1P2	GTTCCCTGTAGAGAAGGGGC	2	Naip5_-_100247104.23-P1P2|Naip5_-_100247109.23-P1P2
Crybg3	P1P2	Crybg3_+_59553924.23-P1P2	GTCAGTGGTGATGGGAGTTC	1	Crybg3_+_59553932.23-P1P2	GTGTATGGATCAGTGGTGAT	2	Crybg3_+_59553924.23-P1P2|Crybg3_+_59553932.23-P1P2
Ttll8	P1P2	Ttll8_-_88954402.23-P1P2	GAGGTTGAACAGGCGTGGTG	1	Ttll8_-_88954354.23-P1P2	GGGGAGGCCGTTACGAAGTT	2	Ttll8_-_88954402.23-P1P2|Ttll8_-_88954354.23-P1P2
Dera	P1P2	Dera_-_137754610.23-P1P2	GCTTTCAGCGGTGGCCACAA	1	Dera_-_137754584.23-P1P2	GGTGTGGCGACCTGGAGCAA	2	Dera_-_137754610.23-P1P2|Dera_-_137754584.23-P1P2
Polr1c	P1P2	Polr1c_+_46247930.23-P1P2	GTCAGGCGGTGGAGGAGATG	1	Polr1c_-_46247988.23-P1P2	GCGCCACTCGCTGTAAAAGG	2	Polr1c_+_46247930.23-P1P2|Polr1c_-_46247988.23-P1P2
Gpr34	P1P2	Gpr34_-_13632831.23-P1P2	GGAGCCCAGCTGACACAACC	1	Gpr34_-_13632807.23-P1P2	GTTGCACCACCACCACCGGA	2	Gpr34_-_13632831.23-P1P2|Gpr34_-_13632807.23-P1P2
Birc5	P1P2	Birc5_+_117849345.23-P1P2	GAGCGCCGGAGCTCCCATGA	1	Birc5_-_117849354.23-P1P2	GGTTGTGGTGACGCCATCAT	2	Birc5_+_117849345.23-P1P2|Birc5_-_117849354.23-P1P2
Hbb-bt	P1P2	Hbb-bt_+_103813734.23-P1P2	GCAGCTCACAAGTAGAAGTT	1	Hbb-bt_+_103813727.23-P1P2	GCAAGTAGAAGTTGGGTGCT	2	Hbb-bt_+_103813734.23-P1P2|Hbb-bt_+_103813727.23-P1P2
Acnat1	P1P2	Acnat1_-_49473839.23-P1P2	GCCTGTTTGTTAGGTTCCCA	1	Acnat1_-_49473928.23-P1P2	GCAACTGAGCTGCTCCAGAA	2	Acnat1_-_49473839.23-P1P2|Acnat1_-_49473928.23-P1P2
4933415F23Rik	P1P2	4933415F23Rik_-_23102216.23-P1P2	GCAAAGCTGGCCCCCCCGAG	1	4933415F23Rik_+_23102204.23-P1P2	GGGACAGCGGCCCCTCGGGG	2	4933415F23Rik_-_23102216.23-P1P2|4933415F23Rik_+_23102204.23-P1P2
Cald1	P2	Cald1_+_34709545.23-P2	GACACGGGCCATATTATCTG	1	Cald1_-_34709511.23-P2	GGACCCAAGTGTTAACACAA	2	Cald1_+_34709545.23-P2|Cald1_-_34709511.23-P2
Olfr1537	ENSMUST00000073248.1	Olfr1537_+_39237940.23-ENSMUST00000073248.1	GTCTGTTCATCCTTTAACAC	1	Olfr1537_+_39238300.23-ENSMUST00000073248.1	GTCTATCTGATCACCATGGC	2	Olfr1537_+_39237940.23-ENSMUST00000073248.1|Olfr1537_+_39238300.23-ENSMUST00000073248.1
Cd300a	P1P2	Cd300a_-_114890317.23-P1P2	GCCCCAGCGGGACTGAACCG	1	Cd300a_-_114890359.23-P1P2	GCTGCCGGTGACCCGTGTGT	2	Cd300a_-_114890317.23-P1P2|Cd300a_-_114890359.23-P1P2
Spatc1l	P1P2	Spatc1l_-_76562368.23-P1P2	GGTGTGAGTACCTGACACCA	1	Spatc1l_+_76562321.23-P1P2	GGCCTGTGGCCCCATGGAGA	2	Spatc1l_-_76562368.23-P1P2|Spatc1l_+_76562321.23-P1P2
Spata9	P1P2	Spata9_-_75967927.23-P1P2	GCTACTGTAACTGGGACTAT	1	Spata9_-_75967748.23-P1P2	GAGTGAACCAGTGAACCAAC	2	Spata9_-_75967927.23-P1P2|Spata9_-_75967748.23-P1P2
Upk2	P1P2	Upk2_-_44454675.23-P1P2	GCCAGCAGAATCAGGATCAG	1	Upk2_-_44454690.23-P1P2	GTCAGGGGCAAGGTCTGGAC	2	Upk2_-_44454675.23-P1P2|Upk2_-_44454690.23-P1P2
Aim2	ENSMUST00000166137.2	Aim2_-_173455407.23-ENSMUST00000166137.2	GACCGGCCTGGACCACATCA	1	Aim2_-_173455410.23-ENSMUST00000166137.2	GGGCCTGGACCACATCACGG	2	Aim2_-_173455407.23-ENSMUST00000166137.2|Aim2_-_173455410.23-ENSMUST00000166137.2
Hsh2d	P1P2	Hsh2d_+_72189682.23-P1P2	GGGATGTAGGATGCATACCT	1	Hsh2d_+_72189657.23-P1P2	GGCTTGGGTTGTGTTCCGAA	2	Hsh2d_+_72189682.23-P1P2|Hsh2d_+_72189657.23-P1P2
Gm4951	P1P2	Gm4951_+_60211993.23-P1P2	GGTGCTTGCTACCCAATCAC	1	Gm4951_-_60212004.23-P1P2	GTGCACACTCCCCTGTGATT	2	Gm4951_+_60211993.23-P1P2|Gm4951_-_60212004.23-P1P2
Napa	P1P2	Napa_-_16098690.23-P1P2	GCGACGTCATGGACAACTCC	1	Napa_-_16098679.23-P1P2	GGAGCAGCTGCGCGACGTCA	2	Napa_-_16098690.23-P1P2|Napa_-_16098679.23-P1P2
Exph5	ENSMUST00000051014.1	Exph5_+_53301556.23-ENSMUST00000051014.1	GGGACCAGCCCACACATACA	1	Exph5_-_53301623.23-ENSMUST00000051014.1	GAAAGGCGCGGAGCTATTAT	2	Exph5_+_53301556.23-ENSMUST00000051014.1|Exph5_-_53301623.23-ENSMUST00000051014.1
Rab4b	P1P2	Rab4b_-_27178821.23-P1P2	GGCTGGCAGCCGCTCCACTC	1	Rab4b_+_27178841.23-P1P2	GGCGGCGCCGGGTCCAGAAG	2	Rab4b_-_27178821.23-P1P2|Rab4b_+_27178841.23-P1P2
Gabrg1	P1P2	Gabrg1_+_70842241.23-P1P2	GTTGGGGACTGAGCTAGTGG	1	Gabrg1_-_70842315.23-P1P2	GACACAGTGAGTACAAGGAG	2	Gabrg1_+_70842241.23-P1P2|Gabrg1_-_70842315.23-P1P2
Obp2a	P1P2	Obp2a_+_25700471.23-P1P2	GGAGGTCTACACGTCAAAGA	1	Obp2a_+_25700221.23-P1P2	GCCCCTCAGCGTCAAGCAGT	2	Obp2a_+_25700471.23-P1P2|Obp2a_+_25700221.23-P1P2
Mrvi1	P1P2	Mrvi1_-_110981805.23-P1P2	GCAGGAGAGCCAGGAGTAAG	1	Mrvi1_-_110982072.23-P1P2	GTGAAGAGGCAGGTTATTCT	2	Mrvi1_-_110981805.23-P1P2|Mrvi1_-_110982072.23-P1P2
Khdc1a	P1P2	Khdc1a_+_21349711.23-P1P2	GGGAGTAGAGAAGTCGCTGG	1	Khdc1a_-_21349619.23-P1P2	Gcagcctggtctatttaatg	2	Khdc1a_+_21349711.23-P1P2|Khdc1a_-_21349619.23-P1P2
Irx2	P1P2	Irx2_+_72628836.23-P1P2	GGCCGGCGGTCGGGATTTGG	1	Irx2_+_72628874.23-P1P2	GGCGGCAGCGCGGAGCCGGT	2	Irx2_+_72628836.23-P1P2|Irx2_+_72628874.23-P1P2
Mageh1	P1P2	Mageh1_+_153037525.23-P1P2	GGCGCTACAGGGAGTGCGGG	1	Mageh1_+_153037295.23-P1P2	GCGGCGCCGCCGGAACGCAA	2	Mageh1_+_153037525.23-P1P2|Mageh1_+_153037295.23-P1P2
Vmn1r51	ENSMUST00000174204.1	Vmn1r51_-_90122978.23-ENSMUST00000174204.1	GTGTATGGTGCAGTTTCTAG	1	Vmn1r51_-_90122810.23-ENSMUST00000174204.1	GGTTTGAAGGTCCTCAGCAC	2	Vmn1r51_-_90122978.23-ENSMUST00000174204.1|Vmn1r51_-_90122810.23-ENSMUST00000174204.1
Fam134c	P1P2	Fam134c_+_101119793.23-P1P2	GGCCGTGGCCCCGGATGTTG	1	Fam134c_-_101119807.23-P1P2	GTCAGCAGCCACAACATCCG	2	Fam134c_+_101119793.23-P1P2|Fam134c_-_101119807.23-P1P2
Klra2	P1P2	Klra2_-_131247303.23-P1P2	GGAATTAATCCACTAACTGA	1	Klra2_-_131247312.23-P1P2	GCACTAACTGAGGGACAAGT	2	Klra2_-_131247303.23-P1P2|Klra2_-_131247312.23-P1P2
D730048I06RIK	P1P2	D730048I06RIK_-_35790057.23-P1P2	GTAGCCGGCTCTATTAGCAC	1	D730048I06RIK_+_35790039.23-P1P2	GTGTCCGGTGCTAATAGAGC	2	D730048I06RIK_-_35790057.23-P1P2|D730048I06RIK_+_35790039.23-P1P2
Cyp3a25	P1P2	Cyp3a25_-_146009333.23-P1P2	GTGAGTGGAAGCCCATAGGA	1	Cyp3a25_-_146009721.23-P1P2	GGCACAATGCTCGAACTTGT	2	Cyp3a25_-_146009333.23-P1P2|Cyp3a25_-_146009721.23-P1P2
Zfp955a	ENSMUST00000008830.8	Zfp955a_+_33255031.23-ENSMUST00000008830.8	GGGAGGACACCTGGATGCAT	1	Zfp955a_-_33254937.23-ENSMUST00000008830.8	GCCGCGCCAGGGTAACGTCA	2	Zfp955a_+_33255031.23-ENSMUST00000008830.8|Zfp955a_-_33254937.23-ENSMUST00000008830.8
Mta3	P1P2	Mta3_-_83706293.23-P1P2	GTACCGGGTCGGAGGTAGGA	1	Mta3_-_83706289.23-P1P2	GCATGTACCGGGTCGGAGGT	2	Mta3_-_83706293.23-P1P2|Mta3_-_83706289.23-P1P2
Pafah2	P2	Pafah2_-_134397410.23-P2	GGGACAGAGCTGCTCGCTAG	1	Pafah2_+_134397446.23-P2	GAGCCCAAAGGGAAAAAACA	2	Pafah2_-_134397410.23-P2|Pafah2_+_134397446.23-P2
Snapin	P1P2	Snapin_+_90490983.23-P1P2	GCGGCAGGCTGAGGGCGTCA	1	Snapin_+_90490970.23-P1P2	GGCGTCAGGGCAGTTCGCGA	2	Snapin_+_90490983.23-P1P2|Snapin_+_90490970.23-P1P2
Aif1l	P1P2	Aif1l_+_31950255.23-P1P2	GGTGTGGCGACGGGACCCAG	1	Aif1l_+_31950331.23-P1P2	GCATGGTATGAGCCCGACTC	2	Aif1l_+_31950255.23-P1P2|Aif1l_+_31950331.23-P1P2
Cxcr6	P1P2	Cxcr6_-_123806532.23-P1P2	GCACTCTGGAACAAAGCTAC	1	Cxcr6_+_123806581.23-P1P2	GCACAGGTCCTGCTGCAGAC	2	Cxcr6_-_123806532.23-P1P2|Cxcr6_+_123806581.23-P1P2
Gphb5	ENSMUST00000051079.2	Gphb5_+_75416771.23-ENSMUST00000051079.2	GAGGCAGCCTGATAACAGAA	1	Gphb5_+_75416351.23-ENSMUST00000051079.2	GAGGGCAGAGGTAATCTATG	2	Gphb5_+_75416771.23-ENSMUST00000051079.2|Gphb5_+_75416351.23-ENSMUST00000051079.2
Ccdc28b	P1	Ccdc28b_+_129623794.23-P1	GCAGGTCAGTAGAACCCCAA	1	Ccdc28b_-_129623663.23-P1	GGACCCAGTAAGAGACCTGA	2	Ccdc28b_+_129623794.23-P1|Ccdc28b_-_129623663.23-P1
Rspry1	P1P2	Rspry1_-_94601995.23-P1P2	GGGTGGGCCCCTGCGCGTAA	1	Rspry1_+_94602024.23-P1P2	GTGTGACAGGTCCAAGAGAG	2	Rspry1_-_94601995.23-P1P2|Rspry1_+_94602024.23-P1P2
Cav1	P1	Cav1_+_17307731.23-P1	GAGCTTCAACCTCGAAGGAA	1	Cav1_+_17307777.23-P1	GAGTCAGCCTGGCTGTGCGG	2	Cav1_+_17307731.23-P1|Cav1_+_17307777.23-P1
Lgi3	P1P2	Lgi3_-_70530935.23-P1P2	GCGAGGTCAGGAGGAATAGG	1	Lgi3_-_70530898.23-P1P2	GGCAGCGCTCCGGAGCTGAA	2	Lgi3_-_70530935.23-P1P2|Lgi3_-_70530898.23-P1P2
Pglyrp3	ENSMUST00000047660.4	Pglyrp3_+_92014624.23-ENSMUST00000047660.4	GTGGTCCCAGGACACCAACA	1	Pglyrp3_+_92014646.23-ENSMUST00000047660.4	GAAGCCTGGGCAACATCTTA	2	Pglyrp3_+_92014624.23-ENSMUST00000047660.4|Pglyrp3_+_92014646.23-ENSMUST00000047660.4
Dync1i2	P1P2	Dync1i2_-_71212001.23-P1P2	GGGACGCCGCGGATCTGCGG	1	Dync1i2_-_71212017.23-P1P2	GCGGCGGCGACAGTTGGAGA	2	Dync1i2_-_71212001.23-P1P2|Dync1i2_-_71212017.23-P1P2
Lbr	P1P2	Lbr_-_181842323.23-P1P2	GCGGGAACTCCAGCCACTCC	1	Lbr_+_181842276.23-P1P2	GAGCGCGGCCAGGTGAGCGT	2	Lbr_-_181842323.23-P1P2|Lbr_+_181842276.23-P1P2
Npb	P1P2	Npb_-_120608522.23-P1P2	GCAGCTCCATGGCCCGGTGT	1	Npb_+_120608533.23-P1P2	GAGGAGCAGCGCCAGGGCAG	2	Npb_-_120608522.23-P1P2|Npb_+_120608533.23-P1P2
Agpat1	P1P2	Agpat1_+_34605976.23-P1P2	GTATCGGTAGGAATGGTGGG	1	Agpat1_-_34605949.23-P1P2	GGACCCTCAGAGAGCCGGCA	2	Agpat1_+_34605976.23-P1P2|Agpat1_-_34605949.23-P1P2
Ncoa6	P1P2	Ncoa6_+_155473739.23-P1P2	Gcgccgacggccggacagac	1	Ncoa6_-_155473785.23-P1P2	GggccgcccgCAGCCCGACC	2	Ncoa6_+_155473739.23-P1P2|Ncoa6_-_155473785.23-P1P2
Syngap1	ENSMUST00000081285.3	Syngap1_+_26941506.23-ENSMUST00000081285.3	GACCACCGTACCTCTGAAGG	1	Syngap1_-_26941483.23-ENSMUST00000081285.3	GTCGAGCCTCCATCCATCGG	2	Syngap1_+_26941506.23-ENSMUST00000081285.3|Syngap1_-_26941483.23-ENSMUST00000081285.3
Pcdhb17	P1P2	Pcdhb17_-_37485033.23-P1P2	GTCTTTTTCGGCCAAAGCAT	1	Pcdhb17_-_37485006.23-P1P2	GTCTCACCACCTAGAATCAA	2	Pcdhb17_-_37485033.23-P1P2|Pcdhb17_-_37485006.23-P1P2
Adap1	P1P2	Adap1_-_139325506.23-P1P2	Gcgcgcggggccgccctgag	1	Adap1_+_139325497.23-P1P2	Ggcgcgcgcagctccgctca	2	Adap1_-_139325506.23-P1P2|Adap1_+_139325497.23-P1P2
Slc35g2	P1P2	Slc35g2_-_100571074.23-P1P2	GCTGCAGCCTGGACTGCCAG	1	Slc35g2_+_100571059.23-P1P2	GTGGCCGCCCCTGGCAGTCC	2	Slc35g2_-_100571074.23-P1P2|Slc35g2_+_100571059.23-P1P2
Xab2	P1P2	Xab2_-_3621065.23-P1P2	GCGAGCCATGAGGGTACGTA	1	Xab2_+_3621242.23-P1P2	GGCGAGTTCCGCGTTCCGAG	2	Xab2_-_3621065.23-P1P2|Xab2_+_3621242.23-P1P2
Vmn1r86	ENSMUST00000094828.2	Vmn1r86_+_13102493.23-ENSMUST00000094828.2	GTACGGGTATATGCTTGATT	1	Vmn1r86_-_13102537.23-ENSMUST00000094828.2	GATAAGTAGATTAATCAGCC	2	Vmn1r86_+_13102493.23-ENSMUST00000094828.2|Vmn1r86_-_13102537.23-ENSMUST00000094828.2
Alx3	P1P2	Alx3_+_107595196.23-P1P2	GCCGCCGGCCCCACGGAGAA	1	Alx3_-_107595173.23-P1P2	GGCGGCCTGTGAGCCCGAGC	2	Alx3_+_107595196.23-P1P2|Alx3_-_107595173.23-P1P2
Olfr1039	ENSMUST00000099910.1	Olfr1039_-_86131271.23-ENSMUST00000099910.1	GAGGCATGAGGACCACATAG	1	Olfr1039_+_86131650.23-ENSMUST00000099910.1	GTTGTACAATCCATGGCTGA	2	Olfr1039_-_86131271.23-ENSMUST00000099910.1|Olfr1039_+_86131650.23-ENSMUST00000099910.1
Ltbr	P1P2	Ltbr_+_125313833.23-P1P2	GCCCGGCGCTGGAGCCCTGG	1	Ltbr_-_125313538.23-P1P2	GAGGCAGGGTCAGCTCTGGA	2	Ltbr_+_125313833.23-P1P2|Ltbr_-_125313538.23-P1P2
Fkrp	P1P2	Fkrp_+_16816535.23-P1P2	GGGATCCCCGGCAGGCTGAG	1	Fkrp_+_16816717.23-P1P2	GggcggccATTGCTCCAAGA	2	Fkrp_+_16816535.23-P1P2|Fkrp_+_16816717.23-P1P2
Fam101a	P1P2	Fam101a_+_125003505.23-P1P2	GCCCGCCACCACTGAGCCAG	1	Fam101a_-_125003519.23-P1P2	GTGTTGCTCCTCTGGCTCAG	2	Fam101a_+_125003505.23-P1P2|Fam101a_-_125003519.23-P1P2
Grk4	P1P2	Grk4_+_34660423.23-P1P2	GACGGCGACAGCTCCAGCAG	1	Grk4_+_34660447.23-P1P2	GACTCGAGAGCGGTCTCCAG	2	Grk4_+_34660423.23-P1P2|Grk4_+_34660447.23-P1P2
Mcfd2	P1P2	Mcfd2_+_87265866.23-P1P2	GCAGCTGGCAAGGTTCACGT	1	Mcfd2_+_87265833.23-P1P2	GACTGCGTCGGGGATTATCG	2	Mcfd2_+_87265866.23-P1P2|Mcfd2_+_87265833.23-P1P2
Lrrc49	P1P2	Lrrc49_+_60687886.23-P1P2	GTGTAGGATTACCTCGAAGG	1	Lrrc49_+_60687889.23-P1P2	GAGCTGTAGGATTACCTCGA	2	Lrrc49_+_60687886.23-P1P2|Lrrc49_+_60687889.23-P1P2
H2-DMb1	P2	H2-DMb1_+_34145705.23-P2	GTCATGCCAGGCACCATGTT	1	H2-DMb1_+_34145825.23-P2	GagacaaacagacCAACAGG	2	H2-DMb1_+_34145705.23-P2|H2-DMb1_+_34145825.23-P2
Cfh	P1P2	Cfh_+_140183282.23-P1P2	GACCACAGTTCATAGCAGAG	1	Cfh_-_140183302.23-P1P2	GTCCTCTCTGCTATGAACTG	2	Cfh_+_140183282.23-P1P2|Cfh_-_140183302.23-P1P2
Tspan10	P1P2	Tspan10_-_120442699.23-P1P2	GCAGAGAAGCCAAGGGACAC	1	Tspan10_+_120442744.23-P1P2	GAGAAAACCACGGAGAGCAG	2	Tspan10_-_120442699.23-P1P2|Tspan10_+_120442744.23-P1P2
Adck5	P1P2	Adck5_-_76576451.23-P1P2	GTGGGCACCAGGGACGTCTG	1	Adck5_-_76576461.23-P1P2	GGGACGTCTGCGGCGAAACC	2	Adck5_-_76576451.23-P1P2|Adck5_-_76576461.23-P1P2
Mboat4	P1P2	Mboat4_-_34115067.23-P1P2	GGGCACCGCTTAGGGACTCT	1	Mboat4_-_34115071.23-P1P2	GCCGCTTAGGGACTCTAGGA	2	Mboat4_-_34115067.23-P1P2|Mboat4_-_34115071.23-P1P2
Mettl5	P1P2	Mettl5_+_69885570.23-P1P2	GGACCGCGAGGACCAGCTAG	1	Mettl5_-_69885555.23-P1P2	GCGTGGAACCCAGACGCTCC	2	Mettl5_+_69885570.23-P1P2|Mettl5_-_69885555.23-P1P2
Tigd3	P1P2	Tigd3_-_5894092.23-P1P2	GCCGAGAGGCTGCTCTGGAG	1	Tigd3_-_5894135.23-P1P2	GCCCTCACCCGGGTCTCTCA	2	Tigd3_-_5894092.23-P1P2|Tigd3_-_5894135.23-P1P2
Tmem171	P1P2	Tmem171_+_98694797.23-P1P2	GGACCAGCAGCGCAGGTAAG	1	Tmem171_-_98694769.23-P1P2	GAGAGGAGAATGTCTTTGCG	2	Tmem171_+_98694797.23-P1P2|Tmem171_-_98694769.23-P1P2
Olfr1385	ENSMUST00000071807.1	Olfr1385_+_49494768.23-ENSMUST00000071807.1	GGAAGATTTATGAGAAGCTG	1	Olfr1385_+_49494679.23-ENSMUST00000071807.1	GTGCAGTCGAAGGTCCATTT	2	Olfr1385_+_49494768.23-ENSMUST00000071807.1|Olfr1385_+_49494679.23-ENSMUST00000071807.1
Snrpg	P1P2	Snrpg_+_86371536.23-P1P2	GCAACGGCGAAGGAGTGAGC	1	Snrpg_-_86371713.23-P1P2	GAGTGGCGCTAAGGTCCGGT	2	Snrpg_+_86371536.23-P1P2|Snrpg_-_86371713.23-P1P2
Fam47e	P2	Fam47e_-_92555084.23-P2	GCAGTGCCATGGCGGAGTGT	1	Fam47e_+_92555097.23-P2	GGTCTAGGAGCCAGGGTCGT	2	Fam47e_-_92555084.23-P2|Fam47e_+_92555097.23-P2
Hnf1a	P1P2	Hnf1a_-_114971043.23-P1P2	GCCCAGCGGCCAGTGAATCA	1	Hnf1a_-_114970998.23-P1P2	GCCCACTAGTCAAGCTCTGT	2	Hnf1a_-_114971043.23-P1P2|Hnf1a_-_114970998.23-P1P2
Cyp2d9	P1P2	Cyp2d9_+_82452522.23-P1P2	GGCGCTGGCGCTGGTGGGTC	1	Cyp2d9_+_82452528.23-P1P2	GAGTCCAGCGCTGGCGCTGG	2	Cyp2d9_+_82452522.23-P1P2|Cyp2d9_+_82452528.23-P1P2
Ppfia1	P1P2	Ppfia1_-_144553692.23-P1P2	GCTAGCGAGCGCAGAGAACC	1	Ppfia1_+_144553661.23-P1P2	GTGCGCTCGCTAGTGTCCCG	2	Ppfia1_-_144553692.23-P1P2|Ppfia1_+_144553661.23-P1P2
Cyp2c50	P1P2	Cyp2c50_+_40090190.23-P1P2	GCGAAAGAAATGGAAATGTT	1	Cyp2c50_+_40090200.23-P1P2	GAACTAGGAATCGAAAGAAA	2	Cyp2c50_+_40090190.23-P1P2|Cyp2c50_+_40090200.23-P1P2
Olfr773	ENSMUST00000072976.3	Olfr773_-_129186957.23-ENSMUST00000072976.3	GTAGGCCAAGGCTAAGTGGG	1	Olfr773_-_129186954.23-ENSMUST00000072976.3	GATTTAGGCCAAGGCTAAGT	2	Olfr773_-_129186957.23-ENSMUST00000072976.3|Olfr773_-_129186954.23-ENSMUST00000072976.3
Serpinb9	P1P2	Serpinb9_-_33004661.23-P1P2	GAAGCCTACTGGGAGCATCA	1	Serpinb9_+_33005020.23-P1P2	GATCCACAGGGAGAAGACAG	2	Serpinb9_-_33004661.23-P1P2|Serpinb9_+_33005020.23-P1P2
Kif17	P1P2	Kif17_-_138250494.23-P1P2	GAGCTGTGAGACCTGCCAGG	1	Kif17_-_138250499.23-P1P2	GTGAGACCTGCCAGGAGGCG	2	Kif17_-_138250494.23-P1P2|Kif17_-_138250499.23-P1P2
2310014L17Rik	P1P2	2310014L17Rik_-_12927466.23-P1P2	GCACAAGGAAAGGTGTCTAC	1	2310014L17Rik_-_12927395.23-P1P2	GGGAGCACTTAGCTACCTAG	2	2310014L17Rik_-_12927466.23-P1P2|2310014L17Rik_-_12927395.23-P1P2
Olfr157	ENSMUST00000079234.2	Olfr157_-_43836267.23-ENSMUST00000079234.2	GACTAAGGGAACGGAGGAGG	1	Olfr157_-_43836261.23-ENSMUST00000079234.2	GTCAAGGACTAAGGGAACGG	2	Olfr157_-_43836267.23-ENSMUST00000079234.2|Olfr157_-_43836261.23-ENSMUST00000079234.2
Actn3	P1P2	Actn3_+_4877820.23-P1P2	GATGCAGCCCGAGGGTCTGG	1	Actn3_+_4877873.23-P1P2	GCTCGCCCAGTGAAGCAGAG	2	Actn3_+_4877820.23-P1P2|Actn3_+_4877873.23-P1P2
Nxnl1	P1P2	Nxnl1_-_71566626.23-P1P2	GCCCAGAGAGGGATCCGATG	1	Nxnl1_+_71566606.23-P1P2	GGCCACATCGGATCCCTCTC	2	Nxnl1_-_71566626.23-P1P2|Nxnl1_+_71566606.23-P1P2
Krtap5-3	P1P2	Krtap5-3_+_142201374.23-P1P2	GTCAGAGGAGCAGGTGGTGA	1	Krtap5-3_+_142201405.23-P1P2	GGGTTCTGGTTATTGGTTGG	2	Krtap5-3_+_142201374.23-P1P2|Krtap5-3_+_142201405.23-P1P2
Pcsk7	P1P2	Pcsk7_-_45907032.23-P1P2	Ggcagcgacagtagcaacag	1	Pcsk7_-_45906986.23-P1P2	GGGAAGCCGAGAGTTTCCGT	2	Pcsk7_-_45907032.23-P1P2|Pcsk7_-_45906986.23-P1P2
Arxes1	ENSMUST00000057625.2	Arxes1_+_136033417.23-ENSMUST00000057625.2	GtggctggctggctCGGCAC	1	Arxes1_+_136033458.23-ENSMUST00000057625.2	GCCCTCCACGCGGGCTCCAC	2	Arxes1_+_136033417.23-ENSMUST00000057625.2|Arxes1_+_136033458.23-ENSMUST00000057625.2
Dmrtc1b	ENSMUST00000101324.2	Dmrtc1b_-_102708249.23-ENSMUST00000101324.2	GGGGCTAGACACAgatcata	1	Dmrtc1b_-_102708230.23-ENSMUST00000101324.2	GATATGCAGCGCAGTTGCAA	2	Dmrtc1b_-_102708249.23-ENSMUST00000101324.2|Dmrtc1b_-_102708230.23-ENSMUST00000101324.2
Pde1a	ENSMUST00000102655.3,ENSMUST00000102654.4	Pde1a_+_80128965.23-ENSMUST00000102655.3,ENSMUST00000102654.4	GTTCTGGCAGAGCCTTCCTT	1	Pde1a_+_80128981.23-ENSMUST00000102655.3,ENSMUST00000102654.4	GCTGTCAAAGACGGCAGTTC	2	Pde1a_+_80128965.23-ENSMUST00000102655.3,ENSMUST00000102654.4|Pde1a_+_80128981.23-ENSMUST00000102655.3,ENSMUST00000102654.4
Krt15	P1P2	Krt15_+_100135883.23-P1P2	GGAGTCTCTCCTGCTTGCTA	1	Krt15_+_100135748.23-P1P2	GGTGGAGGGAGTCTCTATGG	2	Krt15_+_100135883.23-P1P2|Krt15_+_100135748.23-P1P2
Peg10	P2	Peg10_-_4756734.23-P2	GGAGCGCACAGCCTGCCCAG	1	Peg10_+_4757147.23-P2	GgCTGCGGAGGAGGATACTG	2	Peg10_-_4756734.23-P2|Peg10_+_4757147.23-P2
Ccr10	P1P2	Ccr10_+_101175386.23-P1P2	GACAGAGCAggtgggagtcg	1	Ccr10_+_101175394.23-P1P2	GCCAAGCCCACAGAGCAggt	2	Ccr10_+_101175386.23-P1P2|Ccr10_+_101175394.23-P1P2
St7l	P1P2	St7l_-_104865097.23-P1P2	GGCCTGCCGGAGCCGCAAGA	1	St7l_-_104865118.23-P1P2	GGCGGACGGAGACTACTTCG	2	St7l_-_104865097.23-P1P2|St7l_-_104865118.23-P1P2
Xrcc6	P1P2	Xrcc6_+_82016432.23-P1P2	GCACTGGGACAGCAGAAGGT	1	Xrcc6_-_82016412.23-P1P2	GGCTGATTGGGCGAGAGACA	2	Xrcc6_+_82016432.23-P1P2|Xrcc6_-_82016412.23-P1P2
Fam175a	P1P2	Fam175a_+_100820909.23-P1P2	GACCGAGGCGGCAGTATGGA	1	Fam175a_+_100820893.23-P1P2	GGGAGGGCGAGAGCACGTTG	2	Fam175a_+_100820909.23-P1P2|Fam175a_+_100820893.23-P1P2
Ddx27	P1P2	Ddx27_-_167015319.23-P1P2	GCACTCGCTACGTCCGGAAG	1	Ddx27_-_167015381.23-P1P2	GACCATCGGCGAGAATGACG	2	Ddx27_-_167015319.23-P1P2|Ddx27_-_167015381.23-P1P2
Podxl2	P1P2	Podxl2_-_88874767.23-P1P2	GGCATCCAGCGCCCAGGACA	1	Podxl2_+_88874975.23-P1P2	Ggggcggcaacgctgcacca	2	Podxl2_-_88874767.23-P1P2|Podxl2_+_88874975.23-P1P2
9130011E15Rik	P1P2	9130011E15Rik_+_45998419.23-P1P2	GAGGGTGCTAGAGAAGCCGG	1	9130011E15Rik_-_45998474.23-P1P2	GGCCTGCTCGCTCCCGACTC	2	9130011E15Rik_+_45998419.23-P1P2|9130011E15Rik_-_45998474.23-P1P2
Hp1bp3	P1P2	Hp1bp3_-_138217294.23-P1P2	GGCCATTACGGAGTCCCCAG	1	Hp1bp3_-_138216677.23-P1P2	GGGACAGCGGTGTCGCGAGT	2	Hp1bp3_-_138217294.23-P1P2|Hp1bp3_-_138216677.23-P1P2
Pes1	P1P2	Pes1_+_3964012.23-P1P2	GCTCCACGTTGAGAAATTCA	1	Pes1_-_3964000.23-P1P2	GGTGCGGGAGGAAGTAGCTC	2	Pes1_+_3964012.23-P1P2|Pes1_-_3964000.23-P1P2
Ripply1	P1P2	Ripply1_-_139782316.23-P1P2	GaggcagcGGGGTCCATCCT	1	Ripply1_+_139782339.23-P1P2	GTGCTGAAGGTTCTGAGAAC	2	Ripply1_-_139782316.23-P1P2|Ripply1_+_139782339.23-P1P2
Dzank1	P1P2	Dzank1_-_144527446.23-P1P2	GCGGGAGCCGAGCAGATGAT	1	Dzank1_+_144527376.23-P1P2	GGTGGAAACGCAAGCTGCAG	2	Dzank1_-_144527446.23-P1P2|Dzank1_+_144527376.23-P1P2
Ifngr1	P1P2	Ifngr1_-_19592068.23-P1P2	GAGCGCGGGTCCCCTGTCAG	1	Ifngr1_+_19592190.23-P1P2	GGCTCGGAGAGATTACCCGA	2	Ifngr1_-_19592068.23-P1P2|Ifngr1_+_19592190.23-P1P2
Snx14	P1P2	Snx14_-_88438844.23-P1P2	GGAGGACGTGCCGCCCTCAG	1	Snx14_-_88438876.23-P1P2	GGGGCACCCCCAAACCCCGG	2	Snx14_-_88438844.23-P1P2|Snx14_-_88438876.23-P1P2
Ms4a18	P1P2	Ms4a18_+_11017914.23-P1P2	GAACTGCCAGGGCCTAAAGA	1	Ms4a18_+_11017890.23-P1P2	GACAGACTTGCCAGGACTCA	2	Ms4a18_+_11017914.23-P1P2|Ms4a18_+_11017890.23-P1P2
Smim20	P1P2	Smim20_+_53267151.23-P1P2	GTCGCGACCCAGCTCGGAAG	1	Smim20_+_53267231.23-P1P2	GCCGCTGCCATGGAGAGAAA	2	Smim20_+_53267151.23-P1P2|Smim20_+_53267231.23-P1P2
Kap	P1P2	Kap_-_133853655.23-P1P2	GGTTAAGGCAACCAGTGAAC	1	Kap_-_133853634.23-P1P2	GAAAGCATCATGCTTTAGTA	2	Kap_-_133853655.23-P1P2|Kap_-_133853634.23-P1P2
Trank1	P1P2	Trank1_+_111311618.23-P1P2	GAAGGGCCGCGAAGTCGTGA	1	Trank1_+_111311608.23-P1P2	GAAGTCGTGAGGGTGAGGCG	2	Trank1_+_111311618.23-P1P2|Trank1_+_111311608.23-P1P2
Fam84b	P1P2	Fam84b_-_60824886.23-P1P2	GGCGCCGGAGCGGGAGGGAC	1	Fam84b_-_60824881.23-P1P2	GAACAAGCGCCGGAGCGGGA	2	Fam84b_-_60824886.23-P1P2|Fam84b_-_60824881.23-P1P2
Sh3bp2	P2	Sh3bp2_-_34549689.23-P2	GTGGCGAGAGACAGGCTCCA	1	Sh3bp2_-_34549635.23-P2	GCCTGGGGCTCTACGAGCTA	2	Sh3bp2_-_34549689.23-P2|Sh3bp2_-_34549635.23-P2
Pld4	P1P2	Pld4_-_112760759.23-P1P2	GACAGTGGCTGGAACCAGGA	1	Pld4_-_112760755.23-P1P2	GGCAGACAGTGGCTGGAACC	2	Pld4_-_112760759.23-P1P2|Pld4_-_112760755.23-P1P2
Clec4n	P1P2	Clec4n_-_123229890.23-P1P2	GGCAGCATTGGCCCGCTCTG	1	Clec4n_-_123230048.23-P1P2	GGAAAGACAATCCCAAGGTG	2	Clec4n_-_123229890.23-P1P2|Clec4n_-_123230048.23-P1P2
Syce1	P1P2	Syce1_+_140787820.23-P1P2	GGCTGCGGCAGCTGAGGAAG	1	Syce1_-_140787806.23-P1P2	GATACCCAACGGCTGCGGTC	2	Syce1_+_140787820.23-P1P2|Syce1_-_140787806.23-P1P2
Timm44	P1P2	Timm44_+_4275897.23-P1P2	GCGACGCAGGAAGGTCACAC	1	Timm44_+_4275861.23-P1P2	GCGGCGGCAGCTCTGCGGGG	2	Timm44_+_4275897.23-P1P2|Timm44_+_4275861.23-P1P2
Cldn10	P1P2	Cldn10_+_118855017.23-P1P2	GCCCGAGATGGAGACTACGA	1	Cldn10_-_118854992.23-P1P2	GGCGCCGCTGCAGCCCAGCA	2	Cldn10_+_118855017.23-P1P2|Cldn10_-_118854992.23-P1P2
Hmha1	P1P2	Hmha1_+_80016773.23-P1P2	GGGACAGGCGGGCAACGGCA	1	Hmha1_+_80016788.23-P1P2	GAGTGGCCCTAGGTGAGGAC	2	Hmha1_+_80016773.23-P1P2|Hmha1_+_80016788.23-P1P2
Znrd1as	P1P2	Znrd1as_-_36958624.23-P1P2	GTCAATGGCGCACATATTGG	1	Znrd1as_+_36958725.23-P1P2	GGTGCGGAGCGGGAAAGTAG	2	Znrd1as_-_36958624.23-P1P2|Znrd1as_+_36958725.23-P1P2
Dnajc5	P1P2	Dnajc5_+_181520560.23-P1P2	GTAGCAGCGGCAGAGGACGG	1	Dnajc5_+_181520591.23-P1P2	GTCGGCCTGAGGATCCCGGG	2	Dnajc5_+_181520560.23-P1P2|Dnajc5_+_181520591.23-P1P2
Ccdc136	P1P2	Ccdc136_-_29396690.23-P1P2	Ggcggcgggagcagccatgg	1	Ccdc136_-_29396639.23-P1P2	GCTCCCGGTCCCCGGCCCGG	2	Ccdc136_-_29396690.23-P1P2|Ccdc136_-_29396639.23-P1P2
Chmp6	P1	Chmp6_-_119913838.23-P1	GTACGGTGGCCGCAGAGCGG	1	Chmp6_-_119913835.23-P1	GGAGTACGGTGGCCGCAGAG	2	Chmp6_-_119913838.23-P1|Chmp6_-_119913835.23-P1
Ppox	P1P2	Ppox_-_171281075.23-P1P2	GCCCAGCACAAACCCTTCGG	1	Ppox_-_171281072.23-P1P2	GCTCCCCAGCACAAACCCTT	2	Ppox_-_171281075.23-P1P2|Ppox_-_171281072.23-P1P2
Plscr5	P1P2	Plscr5_-_92193143.23-P1P2	GGAGGCGGGCTGCAAGCGAC	1	Plscr5_-_92193128.23-P1P2	GTCTGCAAGCTGACATGAGG	2	Plscr5_-_92193143.23-P1P2|Plscr5_-_92193128.23-P1P2
Il31	P1P2	Il31_-_123482538.23-P1P2	GCCATCTGTGGGAATTCCGG	1	Il31_-_123482527.23-P1P2	GCACAGAGCGATCCATCTGT	2	Il31_-_123482538.23-P1P2|Il31_-_123482527.23-P1P2
Cpne8	P1P2	Cpne8_-_90679281.23-P1P2	GTCCATCTCGAGCTGAGGAA	1	Cpne8_+_90679297.23-P1P2	GCCCGCCGCAGCTTGGATGT	2	Cpne8_-_90679281.23-P1P2|Cpne8_+_90679297.23-P1P2
Shmt2	P1P2	Shmt2_-_127522340.23-P1P2	GTCGCTACAGGAGGCACAGG	1	Shmt2_-_127522376.23-P1P2	GCTGTATCGGTGTAGTACCG	2	Shmt2_-_127522340.23-P1P2|Shmt2_-_127522376.23-P1P2
Mybpc2	P1P2	Mybpc2_-_44524631.23-P1P2	GCCAGGACTTGGGACCGCAG	1	Mybpc2_+_44524623.23-P1P2	GGGCCTGGTTAGAGCCACTG	2	Mybpc2_-_44524631.23-P1P2|Mybpc2_+_44524623.23-P1P2
Cdk2ap1	P1	Cdk2ap1_+_124354747.23-P1	GACCGCAGCCCCCCAAACTT	1	Cdk2ap1_-_124354761.23-P1	GcAACTTGCCAAAGTTTGGG	2	Cdk2ap1_+_124354747.23-P1|Cdk2ap1_-_124354761.23-P1
Csad	P2	Csad_-_102189012.23-P2	GAGCCAGAGTCACATGGCAG	1	Csad_-_102188819.23-P2	GCAGTATCCGAGGAGATGGT	2	Csad_-_102189012.23-P2|Csad_-_102188819.23-P2
Hoxa10	P2	Hoxa10_-_52234900.23-P2	GACATTGTTGTGGGATAATT	1	Hoxa10_-_52234761.23-P2	GGGCAGGTAGACCCCACCGT	2	Hoxa10_-_52234900.23-P2|Hoxa10_-_52234761.23-P2
Npas1	P1P2	Npas1_+_16476751.23-P1P2	GAAGTCTGCGAGGCCGCCGT	1	Npas1_-_16476720.23-P1P2	GGGCCGCTCCATAGACCCCG	2	Npas1_+_16476751.23-P1P2|Npas1_-_16476720.23-P1P2
Rhog	P1P2	Rhog_-_102250061.23-P1P2	GTCACCTGGTGCCCTccccg	1	Rhog_-_102250105.23-P1P2	GggcggcTCTGGGCTCAAGA	2	Rhog_-_102250061.23-P1P2|Rhog_-_102250105.23-P1P2
Gmfg	P1P2	Gmfg_+_28440964.23-P1P2	GACCCCAGGCTGAGAGGGAT	1	Gmfg_+_28440991.23-P1P2	GCAGTTCCTCTGTCTTCTAG	2	Gmfg_+_28440964.23-P1P2|Gmfg_+_28440991.23-P1P2
Polr3gl	P1	Polr3gl_+_96594094.23-P1	GCTGCGTGGGCCCTGAGTGG	1	Polr3gl_+_96594149.23-P1	GGGAGGCGGGCCTAGAACGA	2	Polr3gl_+_96594094.23-P1|Polr3gl_+_96594149.23-P1
Dhrs7	P1P2	Dhrs7_+_72664767.23-P1P2	GGGCAGAGTCGGGTAGGCAA	1	Dhrs7_+_72664751.23-P1P2	GCAAGGGACAGCGATGAGCT	2	Dhrs7_+_72664767.23-P1P2|Dhrs7_+_72664751.23-P1P2
Mkks	P1P2	Mkks_+_136891139.23-P1P2	GTTGCCGCGCAGGGCAAAGG	1	Mkks_+_136891045.23-P1P2	GTAGAGGTGCAGCTGCTGGT	2	Mkks_+_136891139.23-P1P2|Mkks_+_136891045.23-P1P2
C1qtnf7	P1P2	C1qtnf7_+_43515597.23-P1P2	GTTCTGCAAACCCCAGACGG	1	C1qtnf7_+_43515573.23-P1P2	GGATGTGAAGCAAGGGTCTC	2	C1qtnf7_+_43515597.23-P1P2|C1qtnf7_+_43515573.23-P1P2
Bglap3	P2	Bglap3_-_88372727.23-P2	Gtccaggaataagtctccac	1	Bglap3_+_88372707.23-P2	Gtcctgtggagacttattcc	2	Bglap3_-_88372727.23-P2|Bglap3_+_88372707.23-P2
Fn3k	P1P2	Fn3k_+_121435034.23-P1P2	GCCCCCTCCGGAGCTCCCAA	1	Fn3k_-_121434991.23-P1P2	GTCTGCACCTCAACTCTCCA	2	Fn3k_+_121435034.23-P1P2|Fn3k_-_121434991.23-P1P2
Dyrk4	P1P2	Dyrk4_+_126921615.23-P1P2	GCGGGTGCGCGAAGGAGAAG	1	Dyrk4_-_126921790.23-P1P2	GAAGTCGGAGGAGCTGCATC	2	Dyrk4_+_126921615.23-P1P2|Dyrk4_-_126921790.23-P1P2
Slmo1	P1P2	Slmo1_-_67464935.23-P1P2	GGGCTGCGGCGATGAAGATC	1	Slmo1_-_67464970.23-P1P2	GTGTTCGGGTGAGCCAGCGG	2	Slmo1_-_67464935.23-P1P2|Slmo1_-_67464970.23-P1P2
Cd63	P1P2	Cd63_-_128909996.23-P1P2	GACCCGGGGGACGTCCGTGG	1	Cd63_-_128910146.23-P1P2	GCGGCGGGCGGAGATCTACC	2	Cd63_-_128909996.23-P1P2|Cd63_-_128910146.23-P1P2
Paxbp1	P1P2	Paxbp1_-_91044407.23-P1P2	GTCGCTGACTGAGAGGACGA	1	Paxbp1_-_91044400.23-P1P2	GCAGCCGCTCGCTGACTGAG	2	Paxbp1_-_91044407.23-P1P2|Paxbp1_-_91044400.23-P1P2
Mbd3l1	P1P2	Mbd3l1_-_18478392.23-P1P2	GAGTCCAGGTAGCCGGTTAG	1	Mbd3l1_-_18478378.23-P1P2	GTGAAGGTTCCAAGTAGTCC	2	Mbd3l1_-_18478392.23-P1P2|Mbd3l1_-_18478378.23-P1P2
Susd2	P1P2	Susd2_-_75643944.23-P1P2	GGGCAGGAGGGCCAGCTTCA	1	Susd2_+_75643949.23-P1P2	GCCTGCTGGTTGCAGACACA	2	Susd2_-_75643944.23-P1P2|Susd2_+_75643949.23-P1P2
Krt5	P1P2	Krt5_-_101712874.23-P1P2	GGAGGTGCTGGCGAGGTCAG	1	Krt5_-_101712839.23-P1P2	GCTGGAGGAGCAAGAACACT	2	Krt5_-_101712874.23-P1P2|Krt5_-_101712839.23-P1P2
Tfap2d	P1P2	Tfap2d_-_19103104.23-P1P2	GGCAAGGAGCTATCTGATCC	1	Tfap2d_+_19103056.23-P1P2	GACCCACTTAAAAAACCTGT	2	Tfap2d_-_19103104.23-P1P2|Tfap2d_+_19103056.23-P1P2
Pdzd7	P1P2	Pdzd7_+_45046596.23-P1P2	GGCCCGCCAGCGGGCGACAA	1	Pdzd7_+_45046568.23-P1P2	GCGGCACACGGGACCAGGTG	2	Pdzd7_+_45046596.23-P1P2|Pdzd7_+_45046568.23-P1P2
Mettl23	P1P2	Mettl23_+_116843594.23-P1P2	GCACTGTCCATGGCAAACAC	1	Mettl23_+_116843550.23-P1P2	GCGGCCGGAAGGAGACCGCA	2	Mettl23_+_116843594.23-P1P2|Mettl23_+_116843550.23-P1P2
Olfr348	ENSMUST00000112950.1	Olfr348_+_36784351.23-ENSMUST00000112950.1	GTAATAAGTAGGGTCTCTAA	1	Olfr348_+_36784361.23-ENSMUST00000112950.1	GGGAGACAGTATAATAAGTA	2	Olfr348_+_36784351.23-ENSMUST00000112950.1|Olfr348_+_36784361.23-ENSMUST00000112950.1
Mst1r	P1P2	Mst1r_+_107906943.23-P1P2	GGGACCCACGGACACGGCAA	1	Mst1r_+_107906924.23-P1P2	GTGGCACGATCACCTCACCA	2	Mst1r_+_107906943.23-P1P2|Mst1r_+_107906924.23-P1P2
Strn	P1P2	Strn_-_78736536.23-P1P2	GCTGCCTAGGCGCCCAGCAG	1	Strn_+_78736518.23-P1P2	GCCGCCGCTGCTGGGCGCCT	2	Strn_-_78736536.23-P1P2|Strn_+_78736518.23-P1P2
Zcchc13	P1P2	Zcchc13_-_103630636.23-P1P2	GCTCGGGGCCCGTGGCAGTG	1	Zcchc13_-_103630621.23-P1P2	GTCCTAGGCAGGTAGCCTCG	2	Zcchc13_-_103630636.23-P1P2|Zcchc13_-_103630621.23-P1P2
Pcdhb8	P1P2	Pcdhb8_+_37355126.23-P1P2	GCCCTTCTGATTCCCAGGAA	1	Pcdhb8_+_37355117.23-P1P2	GTTCCCAGGAATGGCGTCCT	2	Pcdhb8_+_37355126.23-P1P2|Pcdhb8_+_37355117.23-P1P2
Olfr730	ENSMUST00000051453.1	Olfr730_+_50187151.23-ENSMUST00000051453.1	GCTGGGACTCTCTAATTCCT	1	Olfr730_-_50186991.23-ENSMUST00000051453.1	GATCATCTTGGGAGTAGCAA	2	Olfr730_+_50187151.23-ENSMUST00000051453.1|Olfr730_-_50186991.23-ENSMUST00000051453.1
Palmd	P1P2	Palmd_-_116968708.23-P1P2	GCGAACTGTCAGGAGCGGAG	1	Palmd_-_116968703.23-P1P2	GAATTCCGAACTGTCAGGAG	2	Palmd_-_116968708.23-P1P2|Palmd_-_116968703.23-P1P2
Ccdc147	P1P2	Ccdc147_+_47937724.23-P1P2	GCTGCCCCCAGTGTCTAAAA	1	Ccdc147_+_47937682.23-P1P2	GCAGCCCGGGCGCCGAAATC	2	Ccdc147_+_47937724.23-P1P2|Ccdc147_+_47937682.23-P1P2
Rad54l2	P1P2	Rad54l2_+_106789138.23-P1P2	GGCCGGAGAAGACCGACCCT	1	Rad54l2_-_106789148.23-P1P2	GGCTGGCTCTGGCCGAGGGT	2	Rad54l2_+_106789138.23-P1P2|Rad54l2_-_106789148.23-P1P2
Gm10591	ENSMUST00000178168.1	Gm10591_+_42612642.23-ENSMUST00000178168.1	GTGGGGCTGGAGGCTGGTCC	1	Gm10591_+_42612639.23-ENSMUST00000178168.1	GGGCTGGAGGCTGGTCCAGG	2	Gm10591_+_42612642.23-ENSMUST00000178168.1|Gm10591_+_42612639.23-ENSMUST00000178168.1
Cux2	P1P2	Cux2_-_122049813.23-P1P2	GGGAGGAGCACCGAGCGTCC	1	Cux2_-_122049832.23-P1P2	GTGGCTGCAGCAGCcggtgg	2	Cux2_-_122049813.23-P1P2|Cux2_-_122049832.23-P1P2
Ptprt	P1P2	Ptprt_+_162661002.23-P1P2	GGCCAGCCCCGGGAGCCCAG	1	Ptprt_-_162661033.23-P1P2	GCCCGGGGCTGGCTCCTCTC	2	Ptprt_+_162661002.23-P1P2|Ptprt_-_162661033.23-P1P2
Skint7	P1P2	Skint7_-_111972975.23-P1P2	GAGGGTGATAAATATCTCCC	1	Skint7_-_111973130.23-P1P2	GAGCTCAAGTAAGTGATCTG	2	Skint7_-_111972975.23-P1P2|Skint7_-_111973130.23-P1P2
Smarcb1	P1P2	Smarcb1_-_75921552.23-P1P2	GGAGCGCTCGTGTCACTACT	1	Smarcb1_-_75921529.23-P1P2	GAGGGCAAGCCGGGCGAACC	2	Smarcb1_-_75921552.23-P1P2|Smarcb1_-_75921529.23-P1P2
9530068E07Rik	P1P2	9530068E07Rik_-_52396455.23-P1P2	GAGCAACAGCGCAGGCTCGG	1	9530068E07Rik_+_52396462.23-P1P2	GAGGGCGGAGGCGGCCATAA	2	9530068E07Rik_-_52396455.23-P1P2|9530068E07Rik_+_52396462.23-P1P2
Cops7b	P2	Cops7b_+_86582964.23-P2	GCAGAAACCAACCCCATAGG	1	Cops7b_-_86582975.23-P2	GTATTTGAAATCCTCCTATG	2	Cops7b_+_86582964.23-P2|Cops7b_-_86582975.23-P2
Nap1l1	P1P2	Nap1l1_-_111473459.23-P1P2	GTGCGGCCTGAGGGAccccg	1	Nap1l1_+_111473452.23-P1P2	Gcagccgccggcgctccccg	2	Nap1l1_-_111473459.23-P1P2|Nap1l1_+_111473452.23-P1P2
Tmem229b	P2	Tmem229b_+_78980764.23-P2	GTCCAGGCCATATGTCATGG	1	Tmem229b_+_78980740.23-P2	GCAAATGGTGGACGGTGATA	2	Tmem229b_+_78980764.23-P2|Tmem229b_+_78980740.23-P2
Phf7	P1P2	Phf7_+_31251146.23-P1P2	GCCCTCGGCGACAGCTGGGT	1	Phf7_+_31251124.23-P1P2	GCAGCCTGGGCTGAAAGCGG	2	Phf7_+_31251146.23-P1P2|Phf7_+_31251124.23-P1P2
Smad4	P1P2	Smad4_-_73703755.23-P1P2	GGCAGCGGCGACGACGACCA	1	Smad4_-_73703706.23-P1P2	GGGCGGACGGACGCGAACAC	2	Smad4_-_73703755.23-P1P2|Smad4_-_73703706.23-P1P2
Olfr282	ENSMUST00000075851.3	Olfr282_+_98437804.23-ENSMUST00000075851.3	GGCCATGACAGAGAGCAGGC	1	Olfr282_+_98437532.23-ENSMUST00000075851.3	GAAAAAGTAGAGCCGGGATC	2	Olfr282_+_98437804.23-ENSMUST00000075851.3|Olfr282_+_98437532.23-ENSMUST00000075851.3
Olfr305	ENSMUST00000069236.3	Olfr305_+_86364294.23-ENSMUST00000069236.3	GTAACTGGATTCATACTTAT	1	Olfr305_+_86364309.23-ENSMUST00000069236.3	GCCAATGTCACTGCAGTAAC	2	Olfr305_+_86364294.23-ENSMUST00000069236.3|Olfr305_+_86364309.23-ENSMUST00000069236.3
Vmn2r91	ENSMUST00000172359.1	Vmn2r91_-_18085437.23-ENSMUST00000172359.1	GTTATTTTCCTCACTGAGGG	1	Vmn2r91_-_18085447.23-ENSMUST00000172359.1	GCACTGAGGGTGGGGGAGGT	2	Vmn2r91_-_18085437.23-ENSMUST00000172359.1|Vmn2r91_-_18085447.23-ENSMUST00000172359.1
Olfr855	ENSMUST00000061693.4	Olfr855_+_19584624.23-ENSMUST00000061693.4	GTAAGTATATGAACAGGAAG	1	Olfr855_+_19584630.23-ENSMUST00000061693.4	GGGTGACTAAGTATATGAAC	2	Olfr855_+_19584624.23-ENSMUST00000061693.4|Olfr855_+_19584630.23-ENSMUST00000061693.4
Eif4e3	P1P2	Eif4e3_+_99666748.23-P1P2	GGCCTGGCCGGCGGAGAACA	1	Eif4e3_+_99666792.23-P1P2	GcTGGCGCCGGGAGACTACT	2	Eif4e3_+_99666748.23-P1P2|Eif4e3_+_99666792.23-P1P2
Meaf6	P1P2	Meaf6_+_125085203.23-P1P2	GGCCGGGTGTCTGGGATCTG	1	Meaf6_-_125085179.23-P1P2	GCCGCCGCTTGAGCCCAACA	2	Meaf6_+_125085203.23-P1P2|Meaf6_-_125085179.23-P1P2
Arl10	P1P2	Arl10_+_54575062.23-P1P2	GAGCAAGACCGACCAGCCTG	1	Arl10_+_54575288.23-P1P2	GTAGGCCTCCCTGACCTCGG	2	Arl10_+_54575062.23-P1P2|Arl10_+_54575288.23-P1P2
Grik5	P1P2	Grik5_-_25072726.23-P1P2	GGCCCTGGTGAGACCAAGAA	1	Grik5_-_25072738.23-P1P2	GCCAAGAAGGGAGGCAGACG	2	Grik5_-_25072726.23-P1P2|Grik5_-_25072738.23-P1P2
Pdpr	P1P2	Pdpr_-_111094830.23-P1P2	GAGTCGCGGGCCCGTGAGGT	1	Pdpr_-_111094826.23-P1P2	GCGCGAGTCGCGGGCCCGTG	2	Pdpr_-_111094830.23-P1P2|Pdpr_-_111094826.23-P1P2
Kcng4	P1P2	Kcng4_-_119635516.23-P1P2	GGCAAGGTGGCTCTCTAGAA	1	Kcng4_-_119635503.23-P1P2	GGAAGAGCAGAGGCGCAAGG	2	Kcng4_-_119635516.23-P1P2|Kcng4_-_119635503.23-P1P2
Creb3l3	P1P2	Creb3l3_+_81092549.23-P1P2	GGTGACAGGGACCCGAAAAG	1	Creb3l3_+_81092570.23-P1P2	GTGGCAAAGGCTGTAGCAGG	2	Creb3l3_+_81092549.23-P1P2|Creb3l3_+_81092570.23-P1P2
Lhfpl5	P1P2	Lhfpl5_-_28575760.23-P1P2	GACCCTGGCCGACCTAGAGG	1	Lhfpl5_-_28575793.23-P1P2	GAGCCCATCCTGGTCAGAAC	2	Lhfpl5_-_28575760.23-P1P2|Lhfpl5_-_28575793.23-P1P2
Psmb2	P1P2	Psmb2_+_126677702.23-P1P2	GACGGACAGGGACACTTCCC	1	Psmb2_+_126677714.23-P1P2	GGCTGCAGAGGCCACGGACA	2	Psmb2_+_126677702.23-P1P2|Psmb2_+_126677714.23-P1P2
Slc46a3	P1P2	Slc46a3_+_147894778.23-P1P2	GGGCGGCCGAGTCACCACTA	1	Slc46a3_+_147894795.23-P1P2	GGCAGAGTGATGATGCTCGG	2	Slc46a3_+_147894778.23-P1P2|Slc46a3_+_147894795.23-P1P2
Ttc39d	P1P2	Ttc39d_+_80207519.23-P1P2	GGGAGGGAGCAGGAGACCGC	1	Ttc39d_+_80207564.23-P1P2	GAGAGGTTAGGAGGACCCAC	2	Ttc39d_+_80207519.23-P1P2|Ttc39d_+_80207564.23-P1P2
Olfr1134	ENSMUST00000099857.3	Olfr1134_-_87658460.23-ENSMUST00000099857.3	GCCAGGACTAGAGATATTAG	1	Olfr1134_-_87658443.23-ENSMUST00000099857.3	GACTTGTCTATACCTGATCC	2	Olfr1134_-_87658460.23-ENSMUST00000099857.3|Olfr1134_-_87658443.23-ENSMUST00000099857.3
Ddx42	P1P2	Ddx42_-_106216981.23-P1P2	GTCAGCAACGGGCCGTGAGG	1	Ddx42_-_106216978.23-P1P2	GCAGTCAGCAACGGGCCGTG	2	Ddx42_-_106216981.23-P1P2|Ddx42_-_106216978.23-P1P2
Olfr1120	ENSMUST00000058737.2	Olfr1120_+_87357467.23-ENSMUST00000058737.2	GACTGAGGTTGCATTATCCA	1	Olfr1120_+_87357438.23-ENSMUST00000058737.2	GCTCTGAGTGTTCCATCTGT	2	Olfr1120_+_87357467.23-ENSMUST00000058737.2|Olfr1120_+_87357438.23-ENSMUST00000058737.2
Rabl6	P1P2	Rabl6_+_25608396.23-P1P2	GAGGGCCGTGGAAGCCGGAG	1	Rabl6_-_25608425.23-P1P2	GGCTTCCACGGCCCTCGGCG	2	Rabl6_+_25608396.23-P1P2|Rabl6_-_25608425.23-P1P2
Prrt2	P1P2	Prrt2_-_127021105.23-P1P2	GctgcagcagccgcAGACCG	1	Prrt2_-_127021108.23-P1P2	GcagcagccgcAGACCGGGG	2	Prrt2_-_127021105.23-P1P2|Prrt2_-_127021108.23-P1P2
Itpr3	P1P2	Itpr3_+_27057380.23-P1P2	GGACCCGGGTCCGGGTGAGG	1	Itpr3_+_27057436.23-P1P2	GCGATCGGGACGGCAGGAGT	2	Itpr3_+_27057380.23-P1P2|Itpr3_+_27057436.23-P1P2
Tpm3-rs7	P1P2	Tpm3-rs7_-_113315074.23-P1P2	GGAAGAGGTGGCTCGTAAGT	1	Tpm3-rs7_-_113314608.23-P1P2	GAAGTTATAAAGTCAAGAAG	2	Tpm3-rs7_-_113315074.23-P1P2|Tpm3-rs7_-_113314608.23-P1P2
Purg	P1P2	Purg_-_33385875.23-P1P2	GGGTGCCCGAATCCAGGCAG	1	Purg_-_33385890.23-P1P2	GGCAGCGGCCGCAGGAGGCG	2	Purg_-_33385875.23-P1P2|Purg_-_33385890.23-P1P2
Pold3	P1P2	Pold3_+_100121419.23-P1P2	GGCTCGAAGCCGCACCACCA	1	Pold3_+_100121416.23-P1P2	GCGAAGCCGCACCACCATGG	2	Pold3_+_100121419.23-P1P2|Pold3_+_100121416.23-P1P2
Unc5d	P1P2	Unc5d_+_29219585.23-P1P2	GGGTAGTCCCGGACCCGGAG	1	Unc5d_+_29219525.23-P1P2	GGCGCCGCAGGAGGCGATGG	2	Unc5d_+_29219585.23-P1P2|Unc5d_+_29219525.23-P1P2
Ifi44	P1P2	Ifi44_-_151749873.23-P1P2	GACCGAGGCTGGCACCGAGG	1	Ifi44_-_151749858.23-P1P2	GGTGTGAAGAGTCTGTACCG	2	Ifi44_-_151749873.23-P1P2|Ifi44_-_151749858.23-P1P2
Afmid	P2	Afmid_+_117825932.23-P2	GGCCATGGCCAGATCCGGAG	1	Afmid_+_117825958.23-P2	GTCTGGCCCGCAGAAAGGGA	2	Afmid_+_117825932.23-P2|Afmid_+_117825958.23-P2
Olfr1333	ENSMUST00000106361.1	Olfr1333_-_118835903.23-ENSMUST00000106361.1	GATGAGGGTGATGCAGACCA	1	Olfr1333_-_118835931.23-ENSMUST00000106361.1	GAAGAAGAAAAGGCAATAAG	2	Olfr1333_-_118835903.23-ENSMUST00000106361.1|Olfr1333_-_118835931.23-ENSMUST00000106361.1
Tmem71	P1P2	Tmem71_-_66560974.23-P1P2	GAGGGCAATTTGGTGGTCAG	1	Tmem71_-_66561026.23-P1P2	GAGAATAGCTTGTCATTCTT	2	Tmem71_-_66560974.23-P1P2|Tmem71_-_66561026.23-P1P2
Dynll2	P1P2	Dynll2_-_87987471.23-P1P2	GCCCGGCCGACCGCCTGTCT	1	Dynll2_+_87987437.23-P1P2	GTCGGCCGGGTGGCACGAGG	2	Dynll2_-_87987471.23-P1P2|Dynll2_+_87987437.23-P1P2
Elane	P1P2	Elane_+_79886329.23-P1P2	GAGTCTGCCAAGGGCCATGG	1	Elane_-_79886337.23-P1P2	GGCGAGAACACAGCCCACCA	2	Elane_+_79886329.23-P1P2|Elane_-_79886337.23-P1P2
Gpihbp1	P1P2	Gpihbp1_+_75596673.23-P1P2	GGCCCTGAGAGCCTTCATCC	1	Gpihbp1_+_75596698.23-P1P2	GACTTAGTAGCAAGATCAGG	2	Gpihbp1_+_75596673.23-P1P2|Gpihbp1_+_75596698.23-P1P2
Crbn	P1P2	Crbn_+_106800032.23-P1P2	GGCCGGCGAGGGAGATCAGC	1	Crbn_+_106800049.23-P1P2	GGCGGGTAAACAGACATGGC	2	Crbn_+_106800032.23-P1P2|Crbn_+_106800049.23-P1P2
Ythdf2	P1P2	Ythdf2_-_132212024.23-P1P2	GACGGGAGCAGAGGGTGCGG	1	Ythdf2_-_132212060.23-P1P2	GGACACTCGGAGCCTCGCCT	2	Ythdf2_-_132212024.23-P1P2|Ythdf2_-_132212060.23-P1P2
Atl1	P1P2	Atl1_-_69893287.23-P1P2	GCCAGTGGCCGGCGGACTAG	1	Atl1_-_69893294.23-P1P2	GCCGGCGGACTAGAGGAGGA	2	Atl1_-_69893287.23-P1P2|Atl1_-_69893294.23-P1P2
Fbxo4	P1P2	Fbxo4_+_3979486.23-P1P2	GCCGGGTCGTACCAGCGGGG	1	Fbxo4_+_3979489.23-P1P2	GAGCCCGGGTCGTACCAGCG	2	Fbxo4_+_3979486.23-P1P2|Fbxo4_+_3979489.23-P1P2
Scrg1	P1P2	Scrg1_+_57456049.23-P1P2	GACTGGGGCAGTCTGGGCAA	1	Scrg1_-_57456077.23-P1P2	GCCAGACTGCCCCAGTGAGC	2	Scrg1_+_57456049.23-P1P2|Scrg1_-_57456077.23-P1P2
Gigyf2	P1P2	Gigyf2_-_87327102.23-P1P2	GCCGGACCGCAGGTAACCAG	1	Gigyf2_-_87327062.23-P1P2	GTGAGGCTGAGGATTGACTT	2	Gigyf2_-_87327102.23-P1P2|Gigyf2_-_87327062.23-P1P2
Hsd17b12	P1P2	Hsd17b12_-_94157839.23-P1P2	GGCTCGCGCCCACCCAGTAC	1	Hsd17b12_-_94157870.23-P1P2	GGCCGGGGGAGCGCACTCCA	2	Hsd17b12_-_94157839.23-P1P2|Hsd17b12_-_94157870.23-P1P2
2510003E04Rik	P1P2	2510003E04Rik_+_62578421.23-P1P2	GGCAACGCGGAGGCCTCCAG	1	2510003E04Rik_+_62578402.23-P1P2	GTGGCTGCTGGTCCACGGAC	2	2510003E04Rik_+_62578421.23-P1P2|2510003E04Rik_+_62578402.23-P1P2
Kcnmb4	P1P2	Kcnmb4_-_116473884.23-P1P2	GCCCGACGCTGGGAGCGACT	1	Kcnmb4_-_116473668.23-P1P2	GGGCGCGCGCGAGAACAAAg	2	Kcnmb4_-_116473884.23-P1P2|Kcnmb4_-_116473668.23-P1P2
Rhox11	P1P2	Rhox11_+_38085129.23-P1P2	GCTAAACTAGAGCCTCACAC	1	Rhox11_-_38085162.23-P1P2	GTCTAGTTTAGGCACACACG	2	Rhox11_+_38085129.23-P1P2|Rhox11_-_38085162.23-P1P2
Myl2	P1P2	Myl2_-_122101004.23-P1P2	GGGCTCCTCGAACTCTCCAG	1	Myl2_-_122101036.23-P1P2	GCCTCAGACACCATGGTGAG	2	Myl2_-_122101004.23-P1P2|Myl2_-_122101036.23-P1P2
Arl2bp	P1P2	Arl2bp_+_94666701.23-P1P2	GCGGCGATCGCGCGAGGACG	1	Arl2bp_-_94666674.23-P1P2	GTAGCCCCGCGAGAGGCCGG	2	Arl2bp_+_94666701.23-P1P2|Arl2bp_-_94666674.23-P1P2
Sprr2e	ENSMUST00000068399.1	Sprr2e_-_92352166.23-ENSMUST00000068399.1	GCTCCTGGTACTCAGGTCCT	1	Sprr2e_-_92352175.23-ENSMUST00000068399.1	GCTCAGGTCCTAGGCTACTT	2	Sprr2e_-_92352166.23-ENSMUST00000068399.1|Sprr2e_-_92352175.23-ENSMUST00000068399.1
Abhd14a	P1P2	Abhd14a_+_106447622.23-P1P2	GAGCCGTCTGGTTACCAAGG	1	Abhd14a_-_106447561.23-P1P2	GGGAGTGACCAGAAAGGCTC	2	Abhd14a_+_106447622.23-P1P2|Abhd14a_-_106447561.23-P1P2
Tmem89	P1P2	Tmem89_+_108914681.23-P1P2	GACCAGCCTTGGCTAGGGAC	1	Tmem89_+_108914668.23-P1P2	GAGGGACAGGCATCACCAAC	2	Tmem89_+_108914681.23-P1P2|Tmem89_+_108914668.23-P1P2
Pla2g2e	P2	Pla2g2e_-_138877993.23-P2	GCAGAGCTGCAGGGTGTACC	1	Pla2g2e_+_138878053.23-P2	GTACCTCTGCCACCTCCCAG	2	Pla2g2e_-_138877993.23-P2|Pla2g2e_+_138878053.23-P2
Smtn	P1P2	Smtn_-_3539198.23-P1P2	GTAGAGACCGGCAGACCGAC	1	Smtn_-_3539201.23-P1P2	GAGACCGGCAGACCGACGGG	2	Smtn_-_3539198.23-P1P2|Smtn_-_3539201.23-P1P2
Fam21	P1P2	Fam21_-_116208149.23-P1P2	GTGAGGACGGCGGCCCAGGA	1	Fam21_-_116208116.23-P1P2	GTTTGGAGCTTGCTGAGTGG	2	Fam21_-_116208149.23-P1P2|Fam21_-_116208116.23-P1P2
Niacr1	P1P2	Niacr1_-_123865484.23-P1P2	GAGAGTGCCTCACCTAGCGA	1	Niacr1_+_123865450.23-P1P2	GAGGCACTCTGAAGCTGGAC	2	Niacr1_-_123865484.23-P1P2|Niacr1_+_123865450.23-P1P2
Lce1f	P1P2	Lce1f_+_92720285.23-P1P2	GTAAGTGTCCACAGGAGGTA	1	Lce1f_-_92720318.23-P1P2	GTGGACACTTACCAAGACTG	2	Lce1f_+_92720285.23-P1P2|Lce1f_-_92720318.23-P1P2
Olfr477	ENSMUST00000091605.2	Olfr477_-_107990372.23-ENSMUST00000091605.2	GCATTTCACACCTGAGATGG	1	Olfr477_-_107990648.23-ENSMUST00000091605.2	GCATACAGTAACACTCTCTG	2	Olfr477_-_107990372.23-ENSMUST00000091605.2|Olfr477_-_107990648.23-ENSMUST00000091605.2
Gpr97	P1P2	Gpr97_+_95017950.23-P1P2	GTGGACAGGGATGACCTGGA	1	Gpr97_+_95018038.23-P1P2	GGGTTCCAGCCAGAACAGAT	2	Gpr97_+_95017950.23-P1P2|Gpr97_+_95018038.23-P1P2
Bod1l	P1P2	Bod1l_-_41844260.23-P1P2	GGCCGCCTGAGGGAAGCCAA	1	Bod1l_-_41844225.23-P1P2	GGCAGGCGCTCCGAGGAAGG	2	Bod1l_-_41844260.23-P1P2|Bod1l_-_41844225.23-P1P2
Cbfa2t3	P2	Cbfa2t3_+_122699043.23-P2	GTGGAGCCTCCAAGGAACAG	1	Cbfa2t3_+_122699067.23-P2	GCCGGCTGTAGTGACTAGAA	2	Cbfa2t3_+_122699043.23-P2|Cbfa2t3_+_122699067.23-P2
Olfr1058	ENSMUST00000102631.1	Olfr1058_-_86386356.23-ENSMUST00000102631.1	GTAATGGAGGCTGCAGTTCA	1	Olfr1058_-_86386360.23-ENSMUST00000102631.1	GGGAGGCTGCAGTTCAGGGC	2	Olfr1058_-_86386356.23-ENSMUST00000102631.1|Olfr1058_-_86386360.23-ENSMUST00000102631.1
Tbxa2r	P1P2	Tbxa2r_+_81328777.23-P1P2	GCCTGGGGCCGTGGGTACAG	1	Tbxa2r_+_81328749.23-P1P2	GGGAGACCCTCAGGCGTCCA	2	Tbxa2r_+_81328777.23-P1P2|Tbxa2r_+_81328749.23-P1P2
Grap	P1	Grap_-_61653337.23-P1	GGGTCCTCGGCTGAAGCCCA	1	Grap_+_61653359.23-P1	GGTAGCCTGGAAGCTGTACA	2	Grap_-_61653337.23-P1|Grap_+_61653359.23-P1
Slc25a39	P1P2	Slc25a39_+_102407456.23-P1P2	GGCACGCGCGGACCCTGCAC	1	Slc25a39_-_102407447.23-P1P2	GGGGCCTGGCGGGCCCATAG	2	Slc25a39_+_102407456.23-P1P2|Slc25a39_-_102407447.23-P1P2
Brms1l	P1P2	Brms1l_-_55836452.23-P1P2	GGGCGCGCCCTTCACCGAAG	1	Brms1l_-_55836425.23-P1P2	GTCGGTGGCCGGGTGGGTCG	2	Brms1l_-_55836452.23-P1P2|Brms1l_-_55836425.23-P1P2
Myo10	P1P2	Myo10_-_25622596.23-P1P2	GGAGCCGGCCGCGCCTGGGG	1	Myo10_-_25622550.23-P1P2	GCGGGGCGGACCGAGCACAA	2	Myo10_-_25622596.23-P1P2|Myo10_-_25622550.23-P1P2
Adamts14	P1P2	Adamts14_+_61273404.23-P1P2	GccggctcGCCGAGTCCCTG	1	Adamts14_+_61273351.23-P1P2	GCCGCTGGAGCCAACAGTGA	2	Adamts14_+_61273404.23-P1P2|Adamts14_+_61273351.23-P1P2
Espn	P1	Espn_+_152128851.23-P1	GGAGCTGGGCAGTTGATGGT	1	Espn_-_152128813.23-P1	GGGCCCCTGGGAGTTCATGG	2	Espn_+_152128851.23-P1|Espn_-_152128813.23-P1
Mip	P1P2	Mip_+_128225900.23-P1P2	GAATATGGCCCTCCAAAAGG	1	Mip_+_128225879.23-P1P2	GGCAGACCGAAGTTCCCACA	2	Mip_+_128225900.23-P1P2|Mip_+_128225879.23-P1P2
Cxcl1	P1P2	Cxcl1_+_90891265.23-P1P2	GGAGTCTGGAGTGCTGGAAC	1	Cxcl1_+_90891308.23-P1P2	GGAGCGGGTGGCTGGGATCA	2	Cxcl1_+_90891265.23-P1P2|Cxcl1_+_90891308.23-P1P2
Pecr	P1P2	Pecr_+_72284179.23-P1P2	GACTGGTCAGAGCTACCTAG	1	Pecr_+_72284196.23-P1P2	GCCATGGGCTCTTGGAAGAC	2	Pecr_+_72284179.23-P1P2|Pecr_+_72284196.23-P1P2
Tdp2	P1P2	Tdp2_-_24831706.23-P1P2	GCGGGAAGCAGCGTGAAGAG	1	Tdp2_-_24831919.23-P1P2	GCGTCCTGCGGGAGAACGAC	2	Tdp2_-_24831706.23-P1P2|Tdp2_-_24831919.23-P1P2
Nap1l4	P1P2	Nap1l4_+_143549065.23-P1P2	GCCCGGAGCGAGCTTAGGAC	1	Nap1l4_+_143549035.23-P1P2	GCCGCAGGAGGCGCGAGGTG	2	Nap1l4_+_143549065.23-P1P2|Nap1l4_+_143549035.23-P1P2
Zfp462	P2	Zfp462_-_54945091.23-P2	GTCCGGAGCTCTCTCAATGT	1	Zfp462_+_54945112.23-P2	GACGCCACGGGCTACCACCC	2	Zfp462_-_54945091.23-P2|Zfp462_+_54945112.23-P2
Olfr1446	ENSMUST00000081236.2	Olfr1446_-_12890337.23-ENSMUST00000081236.2	GGAAGCTCAGTCATCACTGT	1	Olfr1446_-_12890386.23-ENSMUST00000081236.2	GAACCAAGGACAGATTACCA	2	Olfr1446_-_12890337.23-ENSMUST00000081236.2|Olfr1446_-_12890386.23-ENSMUST00000081236.2
Gpr84	P1P2	Gpr84_-_103310409.23-P1P2	GCAGGCTTCCAGCTTTTCTA	1	Gpr84_+_103310395.23-P1P2	GTGGCTGTCCCTAGAAAAGC	2	Gpr84_-_103310409.23-P1P2|Gpr84_+_103310395.23-P1P2
Gm5538	P1P2	Gm5538_-_59729822.23-P1P2	GTTAAAGGAAGACGTACCAT	1	Gm5538_-_59729807.23-P1P2	GATCATTGCACAGAGGTTAA	2	Gm5538_-_59729822.23-P1P2|Gm5538_-_59729807.23-P1P2
Dnajc28	P1P2	Dnajc28_-_91618979.23-P1P2	GAACAGAGGACAGACTCCCC	1	Dnajc28_-_91618965.23-P1P2	GACCATCCCCCACGGAACAG	2	Dnajc28_-_91618979.23-P1P2|Dnajc28_-_91618965.23-P1P2
Gucy1b2	P1P2	Gucy1b2_+_62454945.23-P1P2	GAGGCAGCTTCCCTCAGTCC	1	Gucy1b2_+_62454964.23-P1P2	GTCACTCTTCTGGAGTGAAG	2	Gucy1b2_+_62454945.23-P1P2|Gucy1b2_+_62454964.23-P1P2
Naf1	P1P2	Naf1_-_66860312.23-P1P2	GGGCTTCAGCGTGGCCGAGT	1	Naf1_-_66860292.23-P1P2	GGGTTACCTGAGAAACGCGC	2	Naf1_-_66860312.23-P1P2|Naf1_-_66860292.23-P1P2
Scn2a1	P2	Scn2a1_+_65668777.23-P2	GTACAGAGTTTTGGGTTGAT	1	Scn2a1_+_65668948.23-P2	GCCCATGCCTGGTGTTCTAG	2	Scn2a1_+_65668777.23-P2|Scn2a1_+_65668948.23-P2
Gpr137c	P1P2	Gpr137c_-_45219834.23-P1P2	GAGGAACCGAGCCCCCCGGG	1	Gpr137c_+_45220228.23-P1P2	GCCACGCGAGACACAGGAAG	2	Gpr137c_-_45219834.23-P1P2|Gpr137c_+_45220228.23-P1P2
Mpnd	P1P2	Mpnd_-_56009252.23-P1P2	GTGCCGGGACACAGCGTCCA	1	Mpnd_+_56009331.23-P1P2	GCCCCGGGAGACAGAGACTC	2	Mpnd_-_56009252.23-P1P2|Mpnd_+_56009331.23-P1P2
Hspa12a	P1P2	Hspa12a_+_58860905.23-P1P2	GCACCGGAGGCTCCTTTCCC	1	Hspa12a_+_58860921.23-P1P2	GGGAGCCTAAGATTTAGCAC	2	Hspa12a_+_58860905.23-P1P2|Hspa12a_+_58860921.23-P1P2
Ifngr2	P2	Ifngr2_+_91561353.23-P2	GGGCCCCGGTGCAATTGGAG	1	Ifngr2_-_91561323.23-P2	GGCAGGCCTGTCGGTCTTAG	2	Ifngr2_+_91561353.23-P2|Ifngr2_-_91561323.23-P2
Ano8	P1P2	Ano8_-_71485934.23-P1P2	GGGGCTCATGAGGACCGGAG	1	Ano8_-_71485955.23-P1P2	GGCACCACCGAGCGCGCCGG	2	Ano8_-_71485934.23-P1P2|Ano8_-_71485955.23-P1P2
Wdr36	P1P2	Wdr36_-_32837324.23-P1P2	GCCGGCACGGGCTCTTCCTG	1	Wdr36_+_32837318.23-P1P2	GGAGAGCCGCAACACGCCCC	2	Wdr36_-_32837324.23-P1P2|Wdr36_+_32837318.23-P1P2
Lce1j	ENSMUST00000107304.2	Lce1j_+_92789236.23-ENSMUST00000107304.2	GGCTGTAGCTCTGGTGGCGG	1	Lce1j_-_92789433.23-ENSMUST00000107304.2	GTTTTGGAGGACACTTGGCA	2	Lce1j_+_92789236.23-ENSMUST00000107304.2|Lce1j_-_92789433.23-ENSMUST00000107304.2
Slc35b1	P1P2	Slc35b1_+_95384952.23-P1P2	GGAGCAGGTAGCGGTACCGG	1	Slc35b1_+_95384961.23-P1P2	GATCCGTTCAGAGCAGGTAG	2	Slc35b1_+_95384952.23-P1P2|Slc35b1_+_95384961.23-P1P2
Cgn	P1P2	Cgn_+_94786463.23-P1P2	GGGGAGCTCAGAGCTCGGAG	1	Cgn_-_94786418.23-P1P2	GGGATTCACACACCCCGCAG	2	Cgn_+_94786463.23-P1P2|Cgn_-_94786418.23-P1P2
Gal3st4	P1P2	Gal3st4_-_138272742.23-P1P2	GAGGCACTCACCAGGCCATA	1	Gal3st4_+_138272695.23-P1P2	GAAGCTGAGGCTGGAACCGG	2	Gal3st4_-_138272742.23-P1P2|Gal3st4_+_138272695.23-P1P2
Rab19	P1P2	Rab19_+_39381621.23-P1P2	GAGTGCCCGGGACTCTACAA	1	Rab19_-_39381429.23-P1P2	GCTGCAAGACAAGAGGACGA	2	Rab19_+_39381621.23-P1P2|Rab19_-_39381429.23-P1P2
Pop7	P1P2	Pop7_-_137502395.23-P1P2	GGGATCGGAAGAGGAACGCC	1	Pop7_-_137502374.23-P1P2	GTGCAGAAGAAGAACGGAGA	2	Pop7_-_137502395.23-P1P2|Pop7_-_137502374.23-P1P2
Arhgap28	P1P2	Arhgap28_-_68004089.23-P1P2	GAGCTCCGGGAGCGGGTCAG	1	Arhgap28_+_68004056.23-P1P2	GTCCCGGAGCTAGTCCACGT	2	Arhgap28_-_68004089.23-P1P2|Arhgap28_+_68004056.23-P1P2
Ctcfl	P1P2	Ctcfl_+_173119378.23-P1P2	GGCAGGGCTCTGGTAGAGGG	1	Ctcfl_+_173119382.23-P1P2	GCTGCGCAGGGCTCTGGTAG	2	Ctcfl_+_173119378.23-P1P2|Ctcfl_+_173119382.23-P1P2
AI747448	P1P2	AI747448_+_144932410.23-P1P2	GCTTCCTTGATAAAGCTGAA	1	AI747448_-_144932466.23-P1P2	GAAGCAGGTACAAGAGGAAG	2	AI747448_+_144932410.23-P1P2|AI747448_-_144932466.23-P1P2
Lrrc34	P1P2	Lrrc34_+_30647812.23-P1P2	GTAGTGGGCCGAGCCCTGTG	1	Lrrc34_-_30647778.23-P1P2	GCTAAAGAGGAAGGCCGCCG	2	Lrrc34_+_30647812.23-P1P2|Lrrc34_-_30647778.23-P1P2
Incenp	P1P2	Incenp_-_9899466.23-P1P2	GCCGCAGGCGAGGACCTACC	1	Incenp_-_9899419.23-P1P2	GGCTTCCCGCCACGCCGGAC	2	Incenp_-_9899466.23-P1P2|Incenp_-_9899419.23-P1P2
Rtn2	P1	Rtn2_-_19291114.23-P1	GCCTCGGGTCCCTCTCAAGT	1	Rtn2_-_19291176.23-P1	GGAGCCAAGATGGGGAGTAA	2	Rtn2_-_19291114.23-P1|Rtn2_-_19291176.23-P1
Olfr1436	ENSMUST00000087812.1	Olfr1436_+_12299123.23-ENSMUST00000087812.1	GACACTAACTAGGATCATGG	1	Olfr1436_+_12299126.23-ENSMUST00000087812.1	GAAAACACTAACTAGGATCA	2	Olfr1436_+_12299123.23-ENSMUST00000087812.1|Olfr1436_+_12299126.23-ENSMUST00000087812.1
2022-03-01	P1P2	Marc1_-_184811140.23-P1P2	GCCGCACCCATGACTGGAGA	1	Marc1_+_184811124.23-P1P2	GTCCCGCCCTCTCCAGTCAT	2	Marc1_-_184811140.23-P1P2|Marc1_+_184811124.23-P1P2
Vwa1	P1P2	Vwa1_-_155774518.23-P1P2	GAGCATCGCGCCTGGAGTGG	1	Vwa1_-_155774515.23-P1P2	GAACAGCATCGCGCCTGGAG	2	Vwa1_-_155774518.23-P1P2|Vwa1_-_155774515.23-P1P2
Drd5	P1P2	Drd5_+_38319430.23-P1P2	GGCTCGCGGGCCGATCCTGT	1	Drd5_-_38319456.23-P1P2	GAGGATCGGCCCGCGAGCAC	2	Drd5_+_38319430.23-P1P2|Drd5_-_38319456.23-P1P2
Rfx3	P1P2	Rfx3_-_28011114.23-P1P2	GGCCAGGACTACGGTGACTA	1	Rfx3_-_28011136.23-P1P2	GCGCTTGATTCACAAGGCAA	2	Rfx3_-_28011114.23-P1P2|Rfx3_-_28011136.23-P1P2
Slfnl1	P1P2	Slfnl1_+_120532290.23-P1P2	GGCTCCTCCAGGGGCATAGG	1	Slfnl1_-_120532283.23-P1P2	GAAGGAGTTGTGGGAGCTCG	2	Slfnl1_+_120532290.23-P1P2|Slfnl1_-_120532283.23-P1P2
Pdgfa	P1	Pdgfa_-_138994886.23-P1	GCTCAGGGAGCGCGGCCCGG	1	Pdgfa_-_138994962.23-P1	GTGCAAAGCCAGCGAGGAGG	2	Pdgfa_-_138994886.23-P1|Pdgfa_-_138994962.23-P1
Insl6	P1P2	Insl6_-_29325321.23-P1P2	GGCACAGCTGCTTCATCCCT	1	Insl6_+_29325324.23-P1P2	GAGCGCGCCCGGCCCTGTGG	2	Insl6_-_29325321.23-P1P2|Insl6_+_29325324.23-P1P2
Sbk2	P1P2	Sbk2_+_4964287.23-P1P2	GTGAGCCCAGGTCAGAAGTA	1	Sbk2_+_4964314.23-P1P2	GCCTTGGAGAAGGCGAAGTC	2	Sbk2_+_4964287.23-P1P2|Sbk2_+_4964314.23-P1P2
Olfr434	ENSMUST00000076752.3	Olfr434_+_43217233.23-ENSMUST00000076752.3	GAGGAGCACACATTCAGTGT	1	Olfr434_+_43217212.23-ENSMUST00000076752.3	GGCAAAAGCCAAGAAGAGAA	2	Olfr434_+_43217233.23-ENSMUST00000076752.3|Olfr434_+_43217212.23-ENSMUST00000076752.3
Ppap2c	P1P2	Ppap2c_+_79533702.23-P1P2	GGGACAGCTGGGGCAAGCGG	1	Ppap2c_-_79533751.23-P1P2	GCCCCAGGATCACATGGCGG	2	Ppap2c_+_79533702.23-P1P2|Ppap2c_-_79533751.23-P1P2
Grn	P1P2	Grn_+_102430501.23-P1P2	GCTCCCTGGGAGGCATCTGG	1	Grn_-_102430520.23-P1P2	GGACCGCCAGATGCCTCCCA	2	Grn_+_102430501.23-P1P2|Grn_-_102430520.23-P1P2
Tpd52l2	P1P2	Tpd52l2_+_181497229.23-P1P2	GAGCCCCGAGGACTGCAAGC	1	Tpd52l2_+_181497241.23-P1P2	GCTACAGGAGCCCAGCCCCG	2	Tpd52l2_+_181497229.23-P1P2|Tpd52l2_+_181497241.23-P1P2
Ebpl	P1P2	Ebpl_-_61360409.23-P1P2	GATGGCTCCACAGCACACCA	1	Ebpl_-_61360208.23-P1P2	GCCCAAGGCAGGCTGCGACG	2	Ebpl_-_61360409.23-P1P2|Ebpl_-_61360208.23-P1P2
Tm4sf20	P1P2	Tm4sf20_+_82768440.23-P1P2	GGAGCCCAGCCACCCTGAGG	1	Tm4sf20_+_82768443.23-P1P2	GCACGAGCCCAGCCACCCTG	2	Tm4sf20_+_82768440.23-P1P2|Tm4sf20_+_82768443.23-P1P2
Panx3	P1P2	Panx3_+_37669176.23-P1P2	GGTCCTAGCACAGAGATGTG	1	Panx3_-_37669157.23-P1P2	GTCAGGCAGCTAGTTTTCAG	2	Panx3_+_37669176.23-P1P2|Panx3_-_37669157.23-P1P2
Ppp4r2	P1P2	Ppp4r2_-_100833658.23-P1P2	GGACGTGCCGGGCGCCATGT	1	Ppp4r2_-_100833622.23-P1P2	GCGCGAGGACGACAGCTGTG	2	Ppp4r2_-_100833658.23-P1P2|Ppp4r2_-_100833622.23-P1P2
Hoxd9	P1P2	Hoxd9_-_74698036.23-P1P2	GGGGCAGTGGAACCTTGGGT	1	Hoxd9_+_74698053.23-P1P2	GAGGGTGCCACTGGACGACA	2	Hoxd9_-_74698036.23-P1P2|Hoxd9_+_74698053.23-P1P2
Igdcc4	P1P2	Igdcc4_-_65101512.23-P1P2	Gcccaggcgcccggacgcgg	1	Igdcc4_-_65101509.23-P1P2	Gcggcccaggcgcccggacg	2	Igdcc4_-_65101512.23-P1P2|Igdcc4_-_65101509.23-P1P2
Olfr945	ENSMUST00000076903.2	Olfr945_+_39258186.23-ENSMUST00000076903.2	GTGTGCATCAGTTCACACAG	1	Olfr945_+_39258548.23-ENSMUST00000076903.2	GTATATCTAATCACTGTGGT	2	Olfr945_+_39258186.23-ENSMUST00000076903.2|Olfr945_+_39258548.23-ENSMUST00000076903.2
Tpi1	P2	Tpi1_+_124812937.23-P2	GACCGGGAGCCTGAAGAGTG	1	Tpi1_-_124812918.23-P2	GGGTGCACAAACCACCTCTG	2	Tpi1_+_124812937.23-P2|Tpi1_-_124812918.23-P2
Ildr1	P1P2	Ildr1_+_36694058.23-P1P2	GGCATCTCCGAGGAGCCCGT	1	Ildr1_+_36694068.23-P1P2	GGCCAGGACACGCATCTCCG	2	Ildr1_+_36694058.23-P1P2|Ildr1_+_36694068.23-P1P2
Lpar1	P1P2	Lpar1_-_58553200.23-P1P2	GCTCCCGGGCTGAGTTCCAC	1	Lpar1_+_58553181.23-P1P2	GAGCCGGTGGAACTCAGCCC	2	Lpar1_-_58553200.23-P1P2|Lpar1_+_58553181.23-P1P2
Magel2	P1P2	Magel2_-_62377212.23-P1P2	GAGAGCTGCGGAGAGAACCG	1	Magel2_-_62377101.23-P1P2	GAGCACTTGGCTGAAAGCTG	2	Magel2_-_62377212.23-P1P2|Magel2_-_62377101.23-P1P2
Acbd6	P1P2	Acbd6_+_155558204.23-P1P2	GCGGGCCTCGGTGACAGACA	1	Acbd6_+_155558130.23-P1P2	GACCCGGATAGGGCCCCCAG	2	Acbd6_+_155558204.23-P1P2|Acbd6_+_155558130.23-P1P2
Klri1	P1P2	Klri1_+_129717180.23-P1P2	GATGTGCATGTGATTCTATG	1	Klri1_+_129717231.23-P1P2	GAAGCAAACATTTCTAACAA	2	Klri1_+_129717180.23-P1P2|Klri1_+_129717231.23-P1P2
Stap1	P1P2	Stap1_+_86071759.23-P1P2	GAAATCTCCGTAGTGTTGAG	1	Stap1_-_86071994.23-P1P2	GTAATTGTAACCCTGAACAT	2	Stap1_+_86071759.23-P1P2|Stap1_-_86071994.23-P1P2
Rasd1	P1P2	Rasd1_-_59964882.23-P1P2	GGCAGAGAACTCCGGAGTGA	1	Rasd1_-_59964919.23-P1P2	GGGACTGCGCGAGCTGGTCT	2	Rasd1_-_59964882.23-P1P2|Rasd1_-_59964919.23-P1P2
Myh7	P1	Myh7_-_54994516.23-P1	GAGCTCCCACTCCTACCTGA	1	Myh7_+_54994500.23-P1	GTGCTACCCTCAGGTAGGAG	2	Myh7_-_54994516.23-P1|Myh7_+_54994500.23-P1
Smarcad1	P1P2	Smarcad1_+_65042638.23-P1P2	GGCCTGGCCGGGACCTTCCA	1	Smarcad1_-_65042653.23-P1P2	GGCGCTGCCTTGGAAGGTCC	2	Smarcad1_+_65042638.23-P1P2|Smarcad1_-_65042653.23-P1P2
Cps1	P1P2	Cps1_+_67123051.23-P1P2	GTGTGGCGACAGTACAGTTG	1	Cps1_+_67123044.23-P1P2	GACAGTACAGTTGAGGCTGT	2	Cps1_+_67123051.23-P1P2|Cps1_+_67123044.23-P1P2
Irx3	P1P2	Irx3_+_91801372.23-P1P2	GcgccgcGGAGCAGATCAAT	1	Irx3_-_91801398.23-P1P2	GTGATCTGCTCCgcggcggg	2	Irx3_+_91801372.23-P1P2|Irx3_-_91801398.23-P1P2
Rps29	P1P2	Rps29_-_69159108.23-P1P2	GGGAACGAGTCGGCTCGCGC	1	Rps29_-_69158811.23-P1P2	GTAATGGAGCCGCCACAGTA	2	Rps29_-_69159108.23-P1P2|Rps29_-_69158811.23-P1P2
Upb1	P1P2	Upb1_-_75407025.23-P1P2	GGAGGGCAGGCCATTCGTGT	1	Upb1_+_75406954.23-P1P2	GCAGCCTGGCAGGTCTCCAG	2	Upb1_-_75407025.23-P1P2|Upb1_+_75406954.23-P1P2
Osr1	P1P2	Osr1_+_9574482.23-P1P2	GGCGAGAACTTGCTGGGGAG	1	Osr1_-_9574575.23-P1P2	GCCCGGCGGGTAGAACTCCG	2	Osr1_+_9574482.23-P1P2|Osr1_-_9574575.23-P1P2
Stk11	P1P2	Stk11_-_80115852.23-P1P2	GTGTCGGTCTAGGAAAGGGG	1	Stk11_-_80115848.23-P1P2	GGGCGTGTCGGTCTAGGAAA	2	Stk11_-_80115852.23-P1P2|Stk11_-_80115848.23-P1P2
Pcyox1l	P1P2	Pcyox1l_-_61707567.23-P1P2	GGCCAGCACGGCGAGCAGCG	1	Pcyox1l_+_61707607.23-P1P2	GCAACCGCTAGAGGCCGATC	2	Pcyox1l_-_61707567.23-P1P2|Pcyox1l_+_61707607.23-P1P2
Mrpl28	P1P2	Mrpl28_-_26123553.23-P1P2	GGCGCTCTCCTAGAAGTAGA	1	Mrpl28_+_26123539.23-P1P2	GCGCGCGACCCTCTACTTCT	2	Mrpl28_-_26123553.23-P1P2|Mrpl28_+_26123539.23-P1P2
Srrd	P1P2	Srrd_+_112342986.23-P1P2	GCTCGAGCCCTGGAGCGCGG	1	Srrd_-_112342983.23-P1P2	GCCGCGCGCTTCCTCCTCCG	2	Srrd_+_112342986.23-P1P2|Srrd_-_112342983.23-P1P2
Hist1h4d	P1P2	Hist1h4d_-_23581623.23-P1P2	GTGTCTGGACGCGGGAAAGG	1	Hist1h4d_-_23581641.23-P1P2	GGCGGCAAGGGTCTTGGTAA	2	Hist1h4d_-_23581623.23-P1P2|Hist1h4d_-_23581641.23-P1P2
Tmem55b	P1P2	Tmem55b_+_50930829.23-P1P2	GAGGGACCcggtagcgacgg	1	Tmem55b_+_50930832.23-P1P2	GCTTAGGGACCcggtagcga	2	Tmem55b_+_50930829.23-P1P2|Tmem55b_+_50930832.23-P1P2
Atp5g1	P1P2	Atp5g1_+_96075389.23-P1P2	GCGGCCGCTGGGGAGAGTAG	1	Atp5g1_+_96075625.23-P1P2	GACCAAGGGCTAAAGCTGGG	2	Atp5g1_+_96075389.23-P1P2|Atp5g1_+_96075625.23-P1P2
9330182O14Rik	P1P2	9330182O14Rik_+_40134534.23-P1P2	Gcaagggtaagagtccattg	1	9330182O14Rik_+_40134816.23-P1P2	Gctgtagggagaccagtcct	2	9330182O14Rik_+_40134534.23-P1P2|9330182O14Rik_+_40134816.23-P1P2
Xkrx	P1P2	Xkrx_+_134162446.23-P1P2	GTGCGAGCAGGCTAGCTAAT	1	Xkrx_-_134162264.23-P1P2	GCCCCCGAGGCTCCTTTCAG	2	Xkrx_+_134162446.23-P1P2|Xkrx_-_134162264.23-P1P2
Fmnl3	P1P2	Fmnl3_+_99370411.23-P1P2	GCTGCGAGGCGCCCCCTGAG	1	Fmnl3_-_99370422.23-P1P2	GGATTCCTCCGCCCCTCAGG	2	Fmnl3_+_99370411.23-P1P2|Fmnl3_-_99370422.23-P1P2
Kctd7	P1P2	Kctd7_-_130144929.23-P1P2	GTGGTCGTTAGACTGTTGGA	1	Kctd7_+_130144943.23-P1P2	GCGAGGACCTGCAAGCAGTT	2	Kctd7_-_130144929.23-P1P2|Kctd7_+_130144943.23-P1P2
Trp53bp1	P1P2	Trp53bp1_-_121271311.23-P1P2	GTGCCTCGCGCTGGATCTAG	1	Trp53bp1_-_121271340.23-P1P2	GACGCTGCCCAGGCCCCTCC	2	Trp53bp1_-_121271311.23-P1P2|Trp53bp1_-_121271340.23-P1P2
Vamp8	P1P2	Vamp8_+_72390513.23-P1P2	GCCTTGGGTGGAAACAGACT	1	Vamp8_+_72390525.23-P1P2	GAAGCTGTGGCTGCCTTGGG	2	Vamp8_+_72390513.23-P1P2|Vamp8_+_72390525.23-P1P2
Postn	P1P2	Postn_+_54361157.23-P1P2	GGCAGCAGCAGAGCATATAA	1	Postn_-_54361135.23-P1P2	GTCTTCCTGGACGGAGCTCA	2	Postn_+_54361157.23-P1P2|Postn_-_54361135.23-P1P2
Klk10	P1P2	Klk10_+_43781053.23-P1P2	GCCTCTGACCAGGGACCCCT	1	Klk10_+_43781141.23-P1P2	GGGTGCAACCCGCTTCACCT	2	Klk10_+_43781053.23-P1P2|Klk10_+_43781141.23-P1P2
Cdca7	P1P2	Cdca7_-_72476296.23-P1P2	GGTACCCGCCGCCAACATGG	1	Cdca7_-_72476224.23-P1P2	GCCCGGAGCTCGGGTTGTTC	2	Cdca7_-_72476296.23-P1P2|Cdca7_-_72476224.23-P1P2
Sbk1	P1P2	Sbk1_-_126272622.23-P1P2	GCTGGAGCCCGAGTGCCGGG	1	Sbk1_-_126272726.23-P1P2	GCGGCGCCCGAACCCCCCAG	2	Sbk1_-_126272622.23-P1P2|Sbk1_-_126272726.23-P1P2
Wbscr17	P1P2	Wbscr17_+_131307241.23-P1P2	GGCGTGACTGCGGAGCCTGG	1	Wbscr17_+_131307092.23-P1P2	GCGCCTGCGGGCGAGAGTGT	2	Wbscr17_+_131307241.23-P1P2|Wbscr17_+_131307092.23-P1P2
Bsg	P1P2	Bsg_-_79704523.23-P1P2	GCCTGGACGAGGCGACATGG	1	Bsg_+_79704545.23-P1P2	GTGGCCGCTCAAGAGCGTGA	2	Bsg_-_79704523.23-P1P2|Bsg_+_79704545.23-P1P2
Tmem200b	P1P2	Tmem200b_+_131921508.23-P1P2	GCGGGGCTCGGGTGCAGCCG	1	Tmem200b_+_131921564.23-P1P2	GCGGAGCTGGGAGCCAGCGT	2	Tmem200b_+_131921508.23-P1P2|Tmem200b_+_131921564.23-P1P2
Phf20	P1P2	Phf20_+_156196790.23-P1P2	GTCGCCACGAGCTCACCTCA	1	Phf20_-_156196759.23-P1P2	GGCGCGCACAGTCCTTCTGT	2	Phf20_+_156196790.23-P1P2|Phf20_-_156196759.23-P1P2
Mul1	P1P2	Mul1_-_138434716.23-P1P2	GGGGCTGCGCGGCTGCGTAG	1	Mul1_+_138434757.23-P1P2	GGGTCGCGAACCGCTCTCCA	2	Mul1_-_138434716.23-P1P2|Mul1_+_138434757.23-P1P2
Atp9b	P1P2	Atp9b_-_80934030.23-P1P2	GAGGGCCGAAGCGCACCCCA	1	Atp9b_-_80934033.23-P1P2	GGCCGAAGCGCACCCCAggg	2	Atp9b_-_80934030.23-P1P2|Atp9b_-_80934033.23-P1P2
Allc	P1P2	Allc_+_28582504.23-P1P2	GTTCAAAACACTGGACTGTG	1	Allc_+_28582477.23-P1P2	GCCTTGAATCCTGAAGACTG	2	Allc_+_28582504.23-P1P2|Allc_+_28582477.23-P1P2
Nf1	P1P2	Nf1_-_79339693.23-P1P2	GCACTTCCGGTGGGGTGTCA	1	Nf1_-_79339722.23-P1P2	GTCGGACTGTGATGGCTGAG	2	Nf1_-_79339693.23-P1P2|Nf1_-_79339722.23-P1P2
Rsph3b	P1P2	Rsph3b_+_6948284.23-P1P2	GGTTCCCGAGAGAAACCTGA	1	Rsph3b_-_6948291.23-P1P2	GGCAGGTTGCTGGTACCCTC	2	Rsph3b_+_6948284.23-P1P2|Rsph3b_-_6948291.23-P1P2
Fhl5	P1P2	Fhl5_-_25242800.23-P1P2	GTGAGAACTCTGAGTAGTGT	1	Fhl5_+_25242872.23-P1P2	GCAATCGGTGTCAGCACCTG	2	Fhl5_-_25242800.23-P1P2|Fhl5_+_25242872.23-P1P2
Nipa2	P1P2	Nipa2_-_55962399.23-P1P2	GAGCCGAGAGGAGCCTACCT	1	Nipa2_-_55962387.23-P1P2	GCCTCCATGGGAGAGCCGAG	2	Nipa2_-_55962399.23-P1P2|Nipa2_-_55962387.23-P1P2
Rps7	P1P2	Rps7_-_28635869.23-P1P2	GAACCTACCTGACGGATCGC	1	Rps7_+_28635680.23-P1P2	GCCGCGCCCCAGGTGACCGG	2	Rps7_-_28635869.23-P1P2|Rps7_+_28635680.23-P1P2
Ttc39c	P1P2	Ttc39c_+_12643862.23-P1P2	GGGCACACGAGGCCTCGAGT	1	Ttc39c_+_12643839.23-P1P2	GCGAGGCGAGGTGCCGGAGG	2	Ttc39c_+_12643862.23-P1P2|Ttc39c_+_12643839.23-P1P2
Map3k19	ENSMUST00000061512.2	Map3k19_+_127840267.23-ENSMUST00000061512.2	GTGGATTCTATGCCCAGACC	1	Map3k19_-_127840048.23-ENSMUST00000061512.2	GTAGATGAAGTGgagtataa	2	Map3k19_+_127840267.23-ENSMUST00000061512.2|Map3k19_-_127840048.23-ENSMUST00000061512.2
Ech1	P1P2	Ech1_+_28825382.23-P1P2	GAGCAGGCCGCGGAGTTTAC	1	Ech1_+_28825392.23-P1P2	GACGCTGCATCAGCAGGCCG	2	Ech1_+_28825382.23-P1P2|Ech1_+_28825392.23-P1P2
Fzd2	P1P2	Fzd2_-_102604422.23-P1P2	GCCGAGGTGAGGGCTGAAGG	1	Fzd2_-_102604449.23-P1P2	GAGGAGTCGCTGGGTAGAGG	2	Fzd2_-_102604422.23-P1P2|Fzd2_-_102604449.23-P1P2
Ms4a8a	P1P2	Ms4a8a_+_11081056.23-P1P2	GCAGGGTGCAGTCAATCTCT	1	Ms4a8a_-_11080721.23-P1P2	GAGGCCAGAAGATAACTGGT	2	Ms4a8a_+_11081056.23-P1P2|Ms4a8a_-_11080721.23-P1P2
Usp34	P1P2	Usp34_+_23306538.23-P1P2	GAGGCGAAGGAGCCGAAGAG	1	Usp34_-_23306548.23-P1P2	GTGCGCGAGGCGCCTCTCTT	2	Usp34_+_23306538.23-P1P2|Usp34_-_23306548.23-P1P2
Olfr690	ENSMUST00000061920.4	Olfr690_-_105330242.23-ENSMUST00000061920.4	GAAACTAATGGAGAGACAGT	1	Olfr690_-_105330230.23-ENSMUST00000061920.4	GCCGTGACGACTAAAACTAA	2	Olfr690_-_105330242.23-ENSMUST00000061920.4|Olfr690_-_105330230.23-ENSMUST00000061920.4
D930020B18Rik	P1P2	D930020B18Rik_-_121641666.23-P1P2	GGGCTCGGGGAACACGACTC	1	D930020B18Rik_+_121641892.23-P1P2	GCCGCGTCGTACACCTCCGG	2	D930020B18Rik_-_121641666.23-P1P2|D930020B18Rik_+_121641892.23-P1P2
Slc9a3r2	P1	Slc9a3r2_+_24650085.23-P1	GTGCGCGGAGAGCAAGGGTA	1	Slc9a3r2_-_24650216.23-P1	GCCACCCGCAGGCTGGAGTG	2	Slc9a3r2_+_24650085.23-P1|Slc9a3r2_-_24650216.23-P1
Fbxw2	P1P2	Fbxw2_+_34826170.23-P1P2	GGAGCAGCGGCCGTAGGTCC	1	Fbxw2_+_34826203.23-P1P2	GCGGAAGCCGCTCCCCTGTG	2	Fbxw2_+_34826170.23-P1P2|Fbxw2_+_34826203.23-P1P2
C030006K11Rik	P1P2	C030006K11Rik_+_76723797.23-P1P2	GAGAATGTGGCCGCCTAGTG	1	C030006K11Rik_-_76723809.23-P1P2	GTACGCACTGCCCCACTAGG	2	C030006K11Rik_+_76723797.23-P1P2|C030006K11Rik_-_76723809.23-P1P2
Timd4	P1P2	Timd4_+_46810831.23-P1P2	GGAGCTCCGTCACCAGCCAG	1	Timd4_+_46810828.23-P1P2	GCTCCGTCACCAGCCAGAGG	2	Timd4_+_46810831.23-P1P2|Timd4_+_46810828.23-P1P2
Tnr	ENSMUST00000111669.3	Tnr_+_159737586.23-ENSMUST00000111669.3	GGTGATGTCGTCCTCTCTGA	1	Tnr_-_159737537.23-ENSMUST00000111669.3	GGCATCAACTCATTGCTCAG	2	Tnr_+_159737586.23-ENSMUST00000111669.3|Tnr_-_159737537.23-ENSMUST00000111669.3
Lyzl6	P1P2	Lyzl6_+_103638817.23-P1P2	GGGCCAGAGAGTGCTTGGTA	1	Lyzl6_+_103638808.23-P1P2	GGTGCTTGGTAAGGAAGAGG	2	Lyzl6_+_103638817.23-P1P2|Lyzl6_+_103638808.23-P1P2
Slbp	P1P2	Slbp_-_33652283.23-P1P2	GAGTCTGAAGGGCAGCTCGG	1	Slbp_-_33652272.23-P1P2	GATGGCGGCAGAAGTCTGAA	2	Slbp_-_33652283.23-P1P2|Slbp_-_33652272.23-P1P2
Gm11992	P1P2	Gm11992_+_9048641.23-P1P2	GGCTGAACTTCGTACCAAGA	1	Gm11992_-_9048671.23-P1P2	GTACGAAGTTCAGCTACAGG	2	Gm11992_+_9048641.23-P1P2|Gm11992_-_9048671.23-P1P2
Cops6	P1P2	Cops6_-_138161118.23-P1P2	Ggcgggcgcggggaaaatgg	1	Cops6_-_138161149.23-P1P2	Gcggcgggggcgaatgggag	2	Cops6_-_138161118.23-P1P2|Cops6_-_138161149.23-P1P2
Olfr1230	ENSMUST00000099787.1	Olfr1230_-_89296873.23-ENSMUST00000099787.1	GCATACTCGGGGACTAACAA	1	Olfr1230_+_89296837.23-ENSMUST00000099787.1	GGAGTATGCTGGCTGATGGT	2	Olfr1230_-_89296873.23-ENSMUST00000099787.1|Olfr1230_+_89296837.23-ENSMUST00000099787.1
Olfr1186	ENSMUST00000075025.3	Olfr1186_+_88525563.23-ENSMUST00000075025.3	GTGATGTCAATGTCTGCAGT	1	Olfr1186_+_88525592.23-ENSMUST00000075025.3	GAATGAATTCAGTCATCGTA	2	Olfr1186_+_88525563.23-ENSMUST00000075025.3|Olfr1186_+_88525592.23-ENSMUST00000075025.3
Arhgap9	P2	Arhgap9_-_127323751.23-P2	GAGAAGAGCAAAGACTGTGA	1	Arhgap9_-_127323865.23-P2	GGAGAGATCGGGAGGGACAG	2	Arhgap9_-_127323751.23-P2|Arhgap9_-_127323865.23-P2
Timm10	P1P2	Timm10_+_84827070.23-P1P2	GAAAAAGTTACCGGGTACCA	1	Timm10_-_84827248.23-P1P2	GAGACCCACCCCGGGAACCT	2	Timm10_+_84827070.23-P1P2|Timm10_-_84827248.23-P1P2
Mdk	P1P2	Mdk_+_91931479.23-P1P2	GTCCTAGCGGAGAAGAGACT	1	Mdk_-_91931662.23-P1P2	GGGCAGAGCAGCCGCCTGAA	2	Mdk_+_91931479.23-P1P2|Mdk_-_91931662.23-P1P2
Kank2	P1P2	Kank2_+_21798472.23-P1P2	GTCGAGCGTGCCAGGCGAGT	1	Kank2_+_21798524.23-P1P2	GAAGCTTGCGGCGACTGAGG	2	Kank2_+_21798472.23-P1P2|Kank2_+_21798524.23-P1P2
Prpf19	P1P2	Prpf19_-_10895272.23-P1P2	GCGTTAGCTGCAGAAGGCTG	1	Prpf19_+_10895277.23-P1P2	GCACGTGGGGAGGTGGCCGG	2	Prpf19_-_10895272.23-P1P2|Prpf19_+_10895277.23-P1P2
Ttll10	P2	Ttll10_+_156059367.23-P2	GGGGCCTGAGAACACCATGT	1	Ttll10_+_156059333.23-P2	GGGCCCCTAGGAGTCTGACA	2	Ttll10_+_156059367.23-P2|Ttll10_+_156059333.23-P2
Cdkal1	P1P2	Cdkal1_-_29855625.23-P1P2	GAAACTGCACAGACTTCAGA	1	Cdkal1_+_29855593.23-P1P2	GCTGTGCAGTTTCCTGGCAG	2	Cdkal1_-_29855625.23-P1P2|Cdkal1_+_29855593.23-P1P2
Ugt1a6a	P1P2	Ugt1a6a_+_88138385.23-P1P2	GACACTCAGTGACTGACCTC	1	Ugt1a6a_+_88138763.23-P1P2	GGGAGGCACCGGGAAGAAAG	2	Ugt1a6a_+_88138385.23-P1P2|Ugt1a6a_+_88138763.23-P1P2
Pglyrp4	P1P2	Pglyrp4_+_90726944.23-P1P2	GAAGCCAGGACAGCATCCTC	1	Pglyrp4_-_90726940.23-P1P2	GTCCCCGTGTAGGTGTCCTG	2	Pglyrp4_+_90726944.23-P1P2|Pglyrp4_-_90726940.23-P1P2
Eps15	P1P2	Eps15_+_109280433.23-P1P2	GGGCGGCGTTACCTGTGTCA	1	Eps15_-_109280414.23-P1P2	GGTGCATGATGGAAACACCA	2	Eps15_+_109280433.23-P1P2|Eps15_-_109280414.23-P1P2
Msx3	P1P2	Msx3_-_140049055.23-P1P2	GTGGGACGCGTGGGACCCAG	1	Msx3_+_140049025.23-P1P2	GCCCACGCGTCCCAGCCGGG	2	Msx3_-_140049055.23-P1P2|Msx3_+_140049025.23-P1P2
Eea1	P1P2	Eea1_+_95940766.23-P1P2	GGCCCCGACTTCCCCACAGG	1	Eea1_+_95940769.23-P1P2	GGCGGCCCCGACTTCCCCAC	2	Eea1_+_95940766.23-P1P2|Eea1_+_95940769.23-P1P2
Npepps	P1P2	Npepps_+_97280296.23-P1P2	GGGAGAAGCGGCCCTTCGAG	1	Npepps_-_97280525.23-P1P2	GGGGCGGGGGACAGACCCAG	2	Npepps_+_97280296.23-P1P2|Npepps_-_97280525.23-P1P2
Ctag2	P1P2	Ctag2_-_65047738.23-P1P2	GGCAGGTGGTGAAGAAGACG	1	Ctag2_-_65047702.23-P1P2	GACCATGCAGGATCCTAGTG	2	Ctag2_-_65047738.23-P1P2|Ctag2_-_65047702.23-P1P2
Adam7	P1P2	Adam7_+_68533724.23-P1P2	GAGGCTGGGCATCCTTGCAG	1	Adam7_+_68533703.23-P1P2	GGAAGCAAGAACGGGGAGTA	2	Adam7_+_68533724.23-P1P2|Adam7_+_68533703.23-P1P2
Olfr601	ENSMUST00000080474.2	Olfr601_-_103359120.23-ENSMUST00000080474.2	GAATCCCAATCCACACATGA	1	Olfr601_+_103359108.23-ENSMUST00000080474.2	GCCTAGAACACCTTCATGTG	2	Olfr601_-_103359120.23-ENSMUST00000080474.2|Olfr601_+_103359108.23-ENSMUST00000080474.2
Emd	P1P2	Emd_+_74254885.23-P1P2	GCGGCCGGGGCCTACAGACA	1	Emd_-_74254861.23-P1P2	GCTCTGGCGCTTCTTCTTCT	2	Emd_+_74254885.23-P1P2|Emd_-_74254861.23-P1P2
Slc30a8	P1P2	Slc30a8_-_52295740.23-P1P2	GCCCACAACACTGATATAGG	1	Slc30a8_+_52295928.23-P1P2	GAGAGGGAAGGCGTACATCT	2	Slc30a8_-_52295740.23-P1P2|Slc30a8_+_52295928.23-P1P2
Ercc3	P1P2	Ercc3_-_32240354.23-P1P2	GAGTAACTCCTGCGGAGAGG	1	Ercc3_-_32240357.23-P1P2	GAACTCCTGCGGAGAGGAGG	2	Ercc3_-_32240354.23-P1P2|Ercc3_-_32240357.23-P1P2
Gpld1	P1P2	Gpld1_-_24943606.23-P1P2	GGTTAGCAGAGCAGCTGAGG	1	Gpld1_+_24943579.23-P1P2	GCAGCTGCTCTGCTAACGTG	2	Gpld1_-_24943606.23-P1P2|Gpld1_+_24943579.23-P1P2
Gpr111	P1P2	Gpr111_+_42742163.23-P1P2	GCAGTACAGATGCTACTCTC	1	Gpr111_+_42742087.23-P1P2	GGAGGAAGCACCCAGCACGG	2	Gpr111_+_42742163.23-P1P2|Gpr111_+_42742087.23-P1P2
Zfp282	P1P2	Zfp282_-_47877670.23-P1P2	GAGCGGGGAACAGCACTCCC	1	Zfp282_+_47877764.23-P1P2	GGGTGGCAGACCTCCTCCGG	2	Zfp282_-_47877670.23-P1P2|Zfp282_+_47877764.23-P1P2
Cd200	P1P2	Cd200_+_45408862.23-P1P2	GTGCGGCCCAGAGCAAGGAT	1	Cd200_+_45408987.23-P1P2	GGTAGAGTCTGCCTGTGCAG	2	Cd200_+_45408862.23-P1P2|Cd200_+_45408987.23-P1P2
Cwc27	P1P2	Cwc27_+_104816870.23-P1P2	GGAGTAACTAGTGATTAGTA	1	Cwc27_+_104816902.23-P1P2	GACATGGCGGCGTCCATGAT	2	Cwc27_+_104816870.23-P1P2|Cwc27_+_104816902.23-P1P2
Pls1	P2	Pls1_+_95845212.23-P2	GGCGGAGCGGACCAGACCAG	1	Pls1_+_95845253.23-P2	GCGCGAGCGCAGGAGCAAGG	2	Pls1_+_95845212.23-P2|Pls1_+_95845253.23-P2
Far1	P1P2	Far1_-_113513889.23-P1P2	GAGTGAGGAGAGCGCGACCA	1	Far1_-_113513908.23-P1P2	GCGGCGTAGCCATCGCTGAA	2	Far1_-_113513889.23-P1P2|Far1_-_113513908.23-P1P2
Serpinb3d	ENSMUST00000023861.3	Serpinb3d_+_107083222.23-ENSMUST00000023861.3	GCAATACAGCTTGATGCCTG	1	Serpinb3d_+_107083143.23-ENSMUST00000023861.3	GTCCTTCCCAAACACGGTCC	2	Serpinb3d_+_107083222.23-ENSMUST00000023861.3|Serpinb3d_+_107083143.23-ENSMUST00000023861.3
Ak1	P1	Ak1_-_32625494.23-P1	GTGCAGGCGGCTGAGAGGAC	1	Ak1_-_32625509.23-P1	GGGACAGGCAGGGCACTCAC	2	Ak1_-_32625494.23-P1|Ak1_-_32625509.23-P1
Clic6	P1P2	Clic6_+_92498211.23-P1P2	GTCTGTGCAGGCCAGGGTGT	1	Clic6_+_92498143.23-P1P2	GTGGTTCCCTGCGGTCTCAA	2	Clic6_+_92498211.23-P1P2|Clic6_+_92498143.23-P1P2
Klf7	P1P2	Klf7_+_64121398.23-P1P2	GACAGCGCTGCAGATATAGA	1	Klf7_-_64121369.23-P1P2	GTCCAGCGCGTGGATCAGGA	2	Klf7_+_64121398.23-P1P2|Klf7_-_64121369.23-P1P2
A130010J15Rik	P1P2	A130010J15Rik_+_193173628.23-P1P2	GCCCTCCCACGCCCCACACT	1	A130010J15Rik_-_193173679.23-P1P2	GCGCTGGCGGGCAGGCGGAA	2	A130010J15Rik_+_193173628.23-P1P2|A130010J15Rik_-_193173679.23-P1P2
Nop10	P1P2	Nop10_-_112261984.23-P1P2	GGGCGCACTCGGAGTAAACG	1	Nop10_+_112262031.23-P1P2	GCTGCTCGTTGAGGTAATAT	2	Nop10_-_112261984.23-P1P2|Nop10_+_112262031.23-P1P2
Cux1	P1P2	Cux1_+_136567223.23-P1P2	GTCAAGATGGCGGCCAATGT	1	Cux1_-_136567308.23-P1P2	GGAGTTCAGGAGCCGCCAGG	2	Cux1_+_136567223.23-P1P2|Cux1_-_136567308.23-P1P2
Dohh	P1P2	Dohh_+_81384485.23-P1P2	GAGCTCCAAGAACAGGTCCG	1	Dohh_-_81384453.23-P1P2	GGGTCACGTGGCCATCAAGA	2	Dohh_+_81384485.23-P1P2|Dohh_-_81384453.23-P1P2
Fbxo45	P1P2	Fbxo45_+_32246909.23-P1P2	GCGGCTGGCGCTGAAAGGGG	1	Fbxo45_-_32247128.23-P1P2	GAGTTGAGGGCAAGAAGCAA	2	Fbxo45_+_32246909.23-P1P2|Fbxo45_-_32247128.23-P1P2
Osm	P1P2	Osm_+_4236845.23-P1P2	GTCTGGCCCGTGCCTCTCAG	1	Osm_-_4236855.23-P1P2	GAAGCTGTGTCACCCCTGAG	2	Osm_+_4236845.23-P1P2|Osm_-_4236855.23-P1P2
Pla2g4a	P1P2	Pla2g4a_+_149961230.23-P1P2	GCTCCCGACTGAGAGCCAGA	1	Pla2g4a_+_149961252.23-P1P2	GTAGAAGTCGGAACTGTGAA	2	Pla2g4a_+_149961230.23-P1P2|Pla2g4a_+_149961252.23-P1P2
Sh2d1b1	P1P2	Sh2d1b1_-_170277324.23-P1P2	GCCTCTTCACAGCACCTCCT	1	Sh2d1b1_-_170277546.23-P1P2	GTCATGCAGGCGAACCCTGA	2	Sh2d1b1_-_170277324.23-P1P2|Sh2d1b1_-_170277546.23-P1P2
Icosl	P1P2	Icosl_+_78069398.23-P1P2	GCTTGGGGCGCTGAAATCTG	1	Icosl_-_78069371.23-P1P2	GCTAGCGAGCGCAGTTACAG	2	Icosl_+_78069398.23-P1P2|Icosl_-_78069371.23-P1P2
Lce1h	P1P2	Lce1h_+_92764986.23-P1P2	GAAGTGTTTACTGGAGCTAA	1	Lce1h_-_92764849.23-P1P2	GTCTCTTAGTATCAATGGTG	2	Lce1h_+_92764986.23-P1P2|Lce1h_-_92764849.23-P1P2
Synpo	P2	Synpo_-_60648255.23-P2	GTATGCCCGGCCTCTGTCCA	1	Synpo_+_60648243.23-P2	GAGCAGGCTGCCGTGGACAG	2	Synpo_-_60648255.23-P2|Synpo_+_60648243.23-P2
Pdia6	P1P2	Pdia6_-_17266606.23-P1P2	GGGCAGAGCCGAGGCAGCGG	1	Pdia6_-_17266622.23-P1P2	GCGGCGGCACGGACAGAATG	2	Pdia6_-_17266606.23-P1P2|Pdia6_-_17266622.23-P1P2
2410089E03Rik	P1P2	2410089E03Rik_+_8169115.23-P1P2	GCTCCCACCGAGGACCGCAG	1	2410089E03Rik_-_8169074.23-P1P2	GTCGCCTGGACACGGCTCTG	2	2410089E03Rik_+_8169115.23-P1P2|2410089E03Rik_-_8169074.23-P1P2
Gins2	P1P2	Gins2_+_120589011.23-P1P2	GGGCCGCCTACTCTTCAACA	1	Gins2_+_120589047.23-P1P2	GCTGCCTCTGAGTCGCGGAG	2	Gins2_+_120589011.23-P1P2|Gins2_+_120589047.23-P1P2
Krt35	P1P2	Krt35_+_100096197.23-P1P2	GAGCTCTACTGCTTACACCT	1	Krt35_+_100096277.23-P1P2	GGGCCAACCAACACCCACTG	2	Krt35_+_100096197.23-P1P2|Krt35_+_100096277.23-P1P2
Ddx18	P1P2	Ddx18_+_121567887.23-P1P2	GTGTCTCGGTGCAGACGGCT	1	Ddx18_+_121567647.23-P1P2	GGCCCCCGTGGACCCTTCAT	2	Ddx18_+_121567887.23-P1P2|Ddx18_+_121567647.23-P1P2
Gzmc	P1P2	Gzmc_+_56234507.23-P1P2	GAGGTGAGTGAACACCCCTG	1	Gzmc_-_56234494.23-P1P2	GAAGTCAGCAGAGGTGCCAT	2	Gzmc_+_56234507.23-P1P2|Gzmc_-_56234494.23-P1P2
Agr2	P1P2	Agr2_-_35992937.23-P1P2	GACTTGGACGGCAACCCTTG	1	Agr2_-_35992925.23-P1P2	GGCACACTGAGAAACTTGGA	2	Agr2_-_35992937.23-P1P2|Agr2_-_35992925.23-P1P2
Purb	P1P2	Purb_+_6476002.23-P1P2	Gggcggcgaccggcgatgag	1	Purb_+_6475882.23-P1P2	Ggaggcggcggccgagaaga	2	Purb_+_6476002.23-P1P2|Purb_+_6475882.23-P1P2
Fat4	P1P2	Fat4_-_38886532.23-P1P2	GGGCTGTCTCCAGGGTGCAG	1	Fat4_+_38886519.23-P1P2	GCCACAGAGCCCCTGCACCC	2	Fat4_-_38886532.23-P1P2|Fat4_+_38886519.23-P1P2
Oxt	P1P2	Oxt_+_130576217.23-P1P2	GCAGGCAGCAAGCGAGACTG	1	Oxt_+_130576429.23-P1P2	GCCCACGCGAGGCCTTGGTA	2	Oxt_+_130576217.23-P1P2|Oxt_+_130576429.23-P1P2
Syna	ENSMUST00000149604.3	Syna_-_134560156.23-ENSMUST00000149604.3	GGCTGTCCTGAGAGTTCCAA	1	Syna_-_134560057.23-ENSMUST00000149604.3	GCGAGTAGGCAGAGGAACAA	2	Syna_-_134560156.23-ENSMUST00000149604.3|Syna_-_134560057.23-ENSMUST00000149604.3
Fkbp6	P1P2	Fkbp6_+_135349962.23-P1P2	GTCTTCTCGCGCCTCAGGAA	1	Fkbp6_+_135349995.23-P1P2	GGCCTTTGGAGACAGTTGTG	2	Fkbp6_+_135349962.23-P1P2|Fkbp6_+_135349995.23-P1P2
Nqo1	P1P2	Nqo1_-_107403170.23-P1P2	GCTCTTCGGAGAGATCCTTA	1	Nqo1_+_107403014.23-P1P2	GTACTCTGAGGAGGATGTAG	2	Nqo1_-_107403170.23-P1P2|Nqo1_+_107403014.23-P1P2
Card10	P1P2	Card10_+_78802871.23-P1P2	GGCACAGAGCCGGGAGCTCA	1	Card10_-_78802859.23-P1P2	GTCCTCCCCGCACTCACCAC	2	Card10_+_78802871.23-P1P2|Card10_-_78802859.23-P1P2
Gbe1	P1P2	Gbe1_+_70314113.23-P1P2	GGAGTAGCCGAGGCCCGAGA	1	Gbe1_+_70314104.23-P1P2	GAGGCCCGAGAGGGTCGAGT	2	Gbe1_+_70314113.23-P1P2|Gbe1_+_70314104.23-P1P2
2310030G06Rik	P1P2	2310030G06Rik_-_50746341.23-P1P2	GCTCTGCTCCACCTAGGACG	1	2310030G06Rik_-_50746474.23-P1P2	GCAGCAGAGCCGGTTTCCCA	2	2310030G06Rik_-_50746341.23-P1P2|2310030G06Rik_-_50746474.23-P1P2
Cep170b	P1P2	Cep170b_+_112722250.23-P1P2	GggcgcggcccgCACGCTGG	1	Cep170b_-_112722246.23-P1P2	GCTGCCCGTGGGCTCGGCCG	2	Cep170b_+_112722250.23-P1P2|Cep170b_-_112722246.23-P1P2
Olfr654	ENSMUST00000098173.2	Olfr654_+_104587777.23-ENSMUST00000098173.2	GCCCTGGTAAAGTACCTGAA	1	Olfr654_+_104587979.23-ENSMUST00000098173.2	GAGAAGAGAAGCAGGAACAT	2	Olfr654_+_104587777.23-ENSMUST00000098173.2|Olfr654_+_104587979.23-ENSMUST00000098173.2
Acbd7	P1P2	Acbd7_-_3336236.23-P1P2	GTTGCAGGTAAGCCAGATCT	1	Acbd7_+_3336194.23-P1P2	GAGGACATAATGATGAGACA	2	Acbd7_-_3336236.23-P1P2|Acbd7_+_3336194.23-P1P2
Hbs1l	P1P2	Hbs1l_-_21296027.23-P1P2	GGCTCGGCGCAGAGGCCTGG	1	Hbs1l_-_21296345.23-P1P2	GGACCTGAGAGGAACACCCG	2	Hbs1l_-_21296027.23-P1P2|Hbs1l_-_21296345.23-P1P2
Vmn1r74	ENSMUST00000050416.1	Vmn1r74_-_11846838.23-ENSMUST00000050416.1	GAGATTGCCATGGGAATAAT	1	Vmn1r74_-_11846829.23-ENSMUST00000050416.1	GTCTTCTTCCAGATTGCCAT	2	Vmn1r74_-_11846838.23-ENSMUST00000050416.1|Vmn1r74_-_11846829.23-ENSMUST00000050416.1
Igdcc3	P1P2	Igdcc3_+_65141228.23-P1P2	GTAGCGGGGATCGGGTATCA	1	Igdcc3_-_65141417.23-P1P2	GCAGCGGACCGAGAGACCGA	2	Igdcc3_+_65141228.23-P1P2|Igdcc3_-_65141417.23-P1P2
Car6	P1	Car6_-_150201083.23-P1	GTGGATGCCCAGGAAGAACA	1	Car6_-_150201110.23-P1	GACGCTCACCAGGGCCCTCA	2	Car6_-_150201083.23-P1|Car6_-_150201110.23-P1
Drd2	P1P2	Drd2_+_49340406.23-P1P2	GCGCGAGAGGCGACCAGCTC	1	Drd2_+_49340450.23-P1P2	GCGCAGCGCGGGGACCAGGC	2	Drd2_+_49340406.23-P1P2|Drd2_+_49340450.23-P1P2
BC048943	P1P2	BC048943_+_111981084.23-P1P2	GCCTCAGCTAGGAGCATCTG	1	BC048943_+_111981113.23-P1P2	GAGCAGAGCATCACACCACG	2	BC048943_+_111981084.23-P1P2|BC048943_+_111981113.23-P1P2
Inpp5d	P1P2	Inpp5d_+_87620414.23-P1P2	GGTAGTTCAGGGCCCTCTCT	1	Inpp5d_-_87620403.23-P1P2	GATTTCTGAGAGGCAACAGG	2	Inpp5d_+_87620414.23-P1P2|Inpp5d_-_87620403.23-P1P2
Srp54b	ENSMUST00000110708.2	Srp54b_+_55155088.23-ENSMUST00000110708.2	GAGAGTACAGAACTCCGGGA	1	Srp54b_+_55155249.23-ENSMUST00000110708.2	GCCCCCGATAAGGGTAGAAG	2	Srp54b_+_55155088.23-ENSMUST00000110708.2|Srp54b_+_55155249.23-ENSMUST00000110708.2
Zcchc17	P1P2	Zcchc17_+_130359900.23-P1P2	GGGCGTTCCTAGCTATGAAG	1	Zcchc17_+_130359931.23-P1P2	GCATCGTGGGTGAGAACGAG	2	Zcchc17_+_130359900.23-P1P2|Zcchc17_+_130359931.23-P1P2
Acrbp	P1P2	Acrbp_-_125049969.23-P1P2	GGCGAGGCTCGGCCCGTTGG	1	Acrbp_+_125049959.23-P1P2	GCAACAAAGCGACCTCCAAC	2	Acrbp_-_125049969.23-P1P2|Acrbp_+_125049959.23-P1P2
Fam120b	P1P2	Fam120b_-_15396292.23-P1P2	GAGACTGTGGGTCTGAAATC	1	Fam120b_-_15396279.23-P1P2	GGTGAGCACGCCGTAGACTG	2	Fam120b_-_15396292.23-P1P2|Fam120b_-_15396279.23-P1P2
D330045A20Rik	P1P2	D330045A20Rik_+_139480516.23-P1P2	GCGTGCGAGGGTCCCGGCTG	1	D330045A20Rik_+_139480522.23-P1P2	GGACCAGCGTGCGAGGGTCC	2	D330045A20Rik_+_139480516.23-P1P2|D330045A20Rik_+_139480522.23-P1P2
Ackr2	P1P2	Ackr2_+_121898516.23-P1P2	GGCAGCACCACCCTCCCCAA	1	Ackr2_+_121898457.23-P1P2	GACATCCGCCGGAGTCTGAG	2	Ackr2_+_121898516.23-P1P2|Ackr2_+_121898457.23-P1P2
1810065E05Rik	P1P2	1810065E05Rik_+_58421379.23-P1P2	GACTCCTCTGGAGGCAGGGG	1	1810065E05Rik_+_58421200.23-P1P2	GCAGGTGTCATGGCCCACAC	2	1810065E05Rik_+_58421379.23-P1P2|1810065E05Rik_+_58421200.23-P1P2
Ccno	P1P2	Ccno_+_112987849.23-P1P2	GTCTACGACGCCCGGAGCGT	1	Ccno_-_112987900.23-P1P2	GGCGCTACCCGATTGTAACA	2	Ccno_+_112987849.23-P1P2|Ccno_-_112987900.23-P1P2
Olfr693	ENSMUST00000057817.2	Olfr693_+_106678458.23-ENSMUST00000057817.2	GAGCCCTGGAACTCCACCTT	1	Olfr693_-_106678263.23-ENSMUST00000057817.2	GGCTTTGGGACTGATAACTG	2	Olfr693_+_106678458.23-ENSMUST00000057817.2|Olfr693_-_106678263.23-ENSMUST00000057817.2
Cacna2d3	P1P2	Cacna2d3_+_29721473.23-P1P2	GACCCAGTGGCGGGAGACTA	1	Cacna2d3_+_29721584.23-P1P2	GAGCGCCCGAGAGAGACCCG	2	Cacna2d3_+_29721473.23-P1P2|Cacna2d3_+_29721584.23-P1P2
Tubb4b	P1P2	Tubb4b_-_25224452.23-P1P2	GGTATCCAGGACGCAATGAA	1	Tubb4b_+_25224686.23-P1P2	GGACGAGGGCGGGTCATAAG	2	Tubb4b_-_25224452.23-P1P2|Tubb4b_+_25224686.23-P1P2
Gm17252	P1P2	Gm17252_-_35687344.23-P1P2	GCAAATAGCACAGAAAGATG	1	Gm17252_-_35687360.23-P1P2	GATGAGGCATCTCAGTAATT	2	Gm17252_-_35687344.23-P1P2|Gm17252_-_35687360.23-P1P2
Dfnb59	P2	Dfnb59_-_76650295.23-P2	GCAAACTACTTGGTGAGCGT	1	Dfnb59_-_76650350.23-P2	GCATCAAGGAAGGCTTAGTT	2	Dfnb59_-_76650295.23-P2|Dfnb59_-_76650350.23-P2
Azgp1	P1P2	Azgp1_+_137981551.23-P1P2	GAGGACAGGCACCATTGCTA	1	Azgp1_-_137981545.23-P1P2	GCTGTGTAGACTGTTCTCCC	2	Azgp1_+_137981551.23-P1P2|Azgp1_-_137981545.23-P1P2
Myh8	P1P2	Myh8_-_67277249.23-P1P2	GCCAGAGGTAAGTGATGGAT	1	Myh8_+_67277209.23-P1P2	GTGGGCTCTTGGCGGAGATA	2	Myh8_-_67277249.23-P1P2|Myh8_+_67277209.23-P1P2
4930427A07Rik	P1P2	4930427A07Rik_+_113156476.23-P1P2	GGCGGCGACAGCCTCAGGCA	1	4930427A07Rik_-_113156444.23-P1P2	GTAGTGCTGGCTGTATGCGG	2	4930427A07Rik_+_113156476.23-P1P2|4930427A07Rik_-_113156444.23-P1P2
Mycbp2	P1P2	Mycbp2_-_103346757.23-P1P2	GCCACCCGCGGAGTGTGAGG	1	Mycbp2_+_103346787.23-P1P2	GTTGCGGGCAACTCcggtgg	2	Mycbp2_-_103346757.23-P1P2|Mycbp2_+_103346787.23-P1P2
Higd1a	P1P2	Higd1a_-_121857574.23-P1P2	GCACCCGAGTGCGAGAACAC	1	Higd1a_+_121857350.23-P1P2	GGCCGAGGGAACGAGAGTCG	2	Higd1a_-_121857574.23-P1P2|Higd1a_+_121857350.23-P1P2
Erdr1	ENSMUST00000177591.1,ENSMUST00000177671.1,ENSMUST00000179077.1	Erdr1_+_90785570.23-ENSMUST00000177591.1,ENSMUST00000177671.1,ENSMUST00000179077.1	GAGGCTGAACAGAGAAACAC	1	Erdr1_-_90785723.23-ENSMUST00000177591.1,ENSMUST00000177671.1,ENSMUST00000179077.1	GcggacggacTCCACAAGGT	2	Erdr1_+_90785570.23-ENSMUST00000177591.1,ENSMUST00000177671.1,ENSMUST00000179077.1|Erdr1_-_90785723.23-ENSMUST00000177591.1,ENSMUST00000177671.1,ENSMUST00000179077.1
R3hcc1l	P1P2	R3hcc1l_-_42518827.23-P1P2	GAAGAGCAGGCGCTTCATGG	1	R3hcc1l_-_42518798.23-P1P2	GGGCCTGGCGCGCACCCCAG	2	R3hcc1l_-_42518827.23-P1P2|R3hcc1l_-_42518798.23-P1P2
Bdh1	P2	Bdh1_-_31422395.23-P2	GAGCCCGGAGAGATTTCCCT	1	Bdh1_+_31422376.23-P2	GTGCCCAGGGAAATCTCTCC	2	Bdh1_-_31422395.23-P2|Bdh1_+_31422376.23-P2
Zfp457	P1P2	Zfp457_-_67306242.23-P1P2	GAGGTCAGCACAGCACCTCA	1	Zfp457_-_67306356.23-P1P2	GTTCCCTGCACCAACCTCCA	2	Zfp457_-_67306242.23-P1P2|Zfp457_-_67306356.23-P1P2
Kcnip2	P2	Kcnip2_+_45812246.23-P2	GCAGGTGCCGGAGCCCGTTG	1	Kcnip2_-_45812273.23-P2	GCGGGCTCCGGCACCTGCGA	2	Kcnip2_+_45812246.23-P2|Kcnip2_-_45812273.23-P2
Lmo2	P2	Lmo2_+_103969603.23-P2	GGACAGTGCGGCTCTGCTGG	1	Lmo2_+_103969615.23-P2	GTGCGATGCCCGAGACAGTG	2	Lmo2_+_103969603.23-P2|Lmo2_+_103969615.23-P2
3110043O21Rik	P1P2	3110043O21Rik_+_35225786.23-P1P2	GAGGCGCAGCAGCGGCGAGT	1	3110043O21Rik_+_35225794.23-P1P2	GGGCGGTGAAGGCGCAGCAG	2	3110043O21Rik_+_35225786.23-P1P2|3110043O21Rik_+_35225794.23-P1P2
Syf2	P1P2	Syf2_-_134931031.23-P1P2	GAAGTTGTGGTGAGTATCAC	1	Syf2_-_134931000.23-P1P2	GAGAGAGAAGGCTGTAATGG	2	Syf2_-_134931031.23-P1P2|Syf2_-_134931000.23-P1P2
Prnd	ENSMUST00000110170.1,ENSMUST00000110172.2,ENSMUST00000110171.2,ENSMUST00000110169.1	Prnd_+_131951033.23-ENSMUST00000110170.1,ENSMUST00000110172.2,ENSMUST00000110171.2,ENSMUST00000110169.1	GTCAGAGCATAGGAATACTG	1	Prnd_+_131951043.23-ENSMUST00000110170.1,ENSMUST00000110172.2,ENSMUST00000110171.2,ENSMUST00000110169.1	GCCCAGTAGCATCAGAGCAT	2	Prnd_+_131951033.23-ENSMUST00000110170.1,ENSMUST00000110172.2,ENSMUST00000110171.2,ENSMUST00000110169.1|Prnd_+_131951043.23-ENSMUST00000110170.1,ENSMUST00000110172.2,ENSMUST00000110171.2,ENSMUST00000110169.1
Zfp593	P1P2	Zfp593_+_134245555.23-P1P2	GCGGAAGCGCCAACACGTGT	1	Zfp593_-_134245548.23-P1P2	GGACCAAGAAACAGGGAGTA	2	Zfp593_+_134245555.23-P1P2|Zfp593_-_134245548.23-P1P2
4930433I11Rik	P1P2	4930433I11Rik_-_40987638.23-P1P2	GAGTTTGGTGAGATCAGTCA	1	4930433I11Rik_-_40987799.23-P1P2	GAGAAGACTATGGATCCTAG	2	4930433I11Rik_-_40987638.23-P1P2|4930433I11Rik_-_40987799.23-P1P2
Helt	P1P2	Helt_+_46294553.23-P1P2	GGCGATCGTGTGAGACTCAG	1	Helt_+_46294541.23-P1P2	GGACTCAGCGGTGGGACTAA	2	Helt_+_46294553.23-P1P2|Helt_+_46294541.23-P1P2
Sohlh1	P1P2	Sohlh1_+_25847272.23-P1P2	GCCTGGGGTAGGCACAGTGT	1	Sohlh1_+_25847314.23-P1P2	GTGCATAAGAGTGGGCACCC	2	Sohlh1_+_25847272.23-P1P2|Sohlh1_+_25847314.23-P1P2
Prss52	P1P2	Prss52_+_64104318.23-P1P2	GATGGGGAGCTCCAACACTG	1	Prss52_-_64104372.23-P1P2	GAGGCAAGCCGATGAAACGA	2	Prss52_+_64104318.23-P1P2|Prss52_-_64104372.23-P1P2
Prkar2b	P1P2	Prkar2b_-_32061230.23-P1P2	GCCGGCGAGGCTGCTCCGTG	1	Prkar2b_-_32061268.23-P1P2	GAGCACAGCCCGGGGAGGGT	2	Prkar2b_-_32061230.23-P1P2|Prkar2b_-_32061268.23-P1P2
Pigp	P1P2	Pigp_-_94370465.23-P1P2	GCAGCCTTCGTGAGGCTCAG	1	Pigp_+_94370483.23-P1P2	GTCGGTGCTCGCAGGACTCA	2	Pigp_-_94370465.23-P1P2|Pigp_+_94370483.23-P1P2
Parg	P1P2	Parg_-_32202019.23-P1P2	GATCTCGAGCCGAGTGGAAG	1	Parg_+_32202006.23-P1P2	GGGGACGCGCCGCTTCCACT	2	Parg_-_32202019.23-P1P2|Parg_+_32202006.23-P1P2
Csnk2b	P1P2	Csnk2b_-_35121236.23-P1P2	GCAGCAGACGAAGTAGGGAG	1	Csnk2b_-_35121231.23-P1P2	GGGCCGCAGCAGACGAAGTA	2	Csnk2b_-_35121236.23-P1P2|Csnk2b_-_35121231.23-P1P2
Tex9	P1P2	Tex9_+_72491924.23-P1P2	GGGGCGAAGTGTTAGAGTGC	1	Tex9_+_72491945.23-P1P2	GCCGGGGTTGGTAAAGATGG	2	Tex9_+_72491924.23-P1P2|Tex9_+_72491945.23-P1P2
Kl	P1P2	Kl_+_150952697.23-P1P2	GCATGCTGCGGGAGCCGGGA	1	Kl_+_150952746.23-P1P2	Gaacggagcagcaccagccg	2	Kl_+_150952697.23-P1P2|Kl_+_150952746.23-P1P2
Gm17660	P1P2	Gm17660_-_104077594.23-P1P2	GTCCTTGGAGCGACAGATTC	1	Gm17660_+_104077504.23-P1P2	GAAGTATGTGGGATATTCTT	2	Gm17660_-_104077594.23-P1P2|Gm17660_+_104077504.23-P1P2
Pax3	P1P2	Pax3_+_78197084.23-P1P2	GTCACGACGGGAGGAGACTT	1	Pax3_-_78197061.23-P1P2	GGCGAAGATCGGGTGAGGGA	2	Pax3_+_78197084.23-P1P2|Pax3_-_78197061.23-P1P2
Lactb2	P1P2	Lactb2_-_13660442.23-P1P2	GTGCTCGATGCGCTGCAGAG	1	Lactb2_-_13660476.23-P1P2	GTATCTACCTCGGTGACCGC	2	Lactb2_-_13660442.23-P1P2|Lactb2_-_13660476.23-P1P2
C1qtnf9	P1P2	C1qtnf9_-_60768183.23-P1P2	GGCTCAGGTAAGTGCACTAA	1	C1qtnf9_+_60768144.23-P1P2	GGAGCCCAGGAGTTGCAGGC	2	C1qtnf9_-_60768183.23-P1P2|C1qtnf9_+_60768144.23-P1P2
Bai2	P1P2	Bai2_+_129984864.23-P1P2	GCGCGCGCCGGGCCGAGTGA	1	Bai2_+_129984908.23-P1P2	GccaccgAACCGGATTCCTC	2	Bai2_+_129984864.23-P1P2|Bai2_+_129984908.23-P1P2
Stx7	P1P2	Stx7_-_24149374.23-P1P2	GGTGGGCCCCCGGGTGACAG	1	Stx7_+_24149358.23-P1P2	GTCCAGCCGCTGTCACCCGG	2	Stx7_-_24149374.23-P1P2|Stx7_+_24149358.23-P1P2
Gns	P1P2	Gns_-_121365353.23-P1P2	GACCAGGACGCGGAGCTCGG	1	Gns_+_121365169.23-P1P2	GTGGCGGCCAAGCTCCGCGG	2	Gns_-_121365353.23-P1P2|Gns_+_121365169.23-P1P2
Dmtf1	P1P2	Dmtf1_-_9161702.23-P1P2	GAAGCAGCCGCGGGAGAGAG	1	Dmtf1_+_9161687.23-P1P2	GCTGCAGCCACTCTCTCCCG	2	Dmtf1_-_9161702.23-P1P2|Dmtf1_+_9161687.23-P1P2
Ccnl2	P1P2	Ccnl2_-_155812517.23-P1P2	GGGAAGGGCCCGAGAAGAGT	1	Ccnl2_-_155812520.23-P1P2	GAGGGCCCGAGAAGAGTCGG	2	Ccnl2_-_155812517.23-P1P2|Ccnl2_-_155812520.23-P1P2
Cdh13	P1P2	Cdh13_-_118283771.23-P1P2	GAGGCAGAGCCTCTCCTCAA	1	Cdh13_+_118283824.23-P1P2	GGACTAGAAGAAGCGCCTGG	2	Cdh13_-_118283771.23-P1P2|Cdh13_+_118283824.23-P1P2
Cst7	P1P2	Cst7_+_150570487.23-P1P2	GAATGCAGGGAGCATGTAGT	1	Cst7_+_150570452.23-P1P2	GAAGTACAGCTCCAGGACCA	2	Cst7_+_150570487.23-P1P2|Cst7_+_150570452.23-P1P2
Cdk10	P1P2	Cdk10_-_123224873.23-P1P2	GCGCTGGAAGAGGGCGGCAG	1	Cdk10_-_123224864.23-P1P2	GACGCCTGCGCGCTGGAAGA	2	Cdk10_-_123224873.23-P1P2|Cdk10_-_123224864.23-P1P2
Irf2bp2	P1P2	Irf2bp2_+_126593488.23-P1P2	GcgcgcgcgggATCCACGGG	1	Irf2bp2_+_126593918.23-P1P2	GgcaggagcTGAGGCGCAGT	2	Irf2bp2_+_126593488.23-P1P2|Irf2bp2_+_126593918.23-P1P2
Fam162b	P1P2	Fam162b_-_51590406.23-P1P2	GGCCTAGTCGCAGAACGCTG	1	Fam162b_+_51590434.23-P1P2	GGCGCTACAGAAGGCGACTG	2	Fam162b_-_51590406.23-P1P2|Fam162b_+_51590434.23-P1P2
Isoc2a	P1P2	Isoc2a_-_4877133.23-P1P2	GACTAGTGACAGTCCAGTGG	1	Isoc2a_-_4877158.23-P1P2	GGTGCGCTGAAGGGACCTAG	2	Isoc2a_-_4877133.23-P1P2|Isoc2a_-_4877158.23-P1P2
Rps24	P1P2	Rps24_-_24490758.23-P1P2	GTCCGGCGCCGTAGCCATCA	1	Rps24_+_24490766.23-P1P2	GGGATAGTGCTGAGAGCCCG	2	Rps24_-_24490758.23-P1P2|Rps24_+_24490766.23-P1P2
Wdfy2	P1P2	Wdfy2_-_62837743.23-P1P2	GCGGCTTGCGGCTAGTGTGG	1	Wdfy2_-_62837752.23-P1P2	GGCTAGTGTGGCGGCGGTGT	2	Wdfy2_-_62837743.23-P1P2|Wdfy2_-_62837752.23-P1P2
Guk1	P2	Guk1_+_59187701.23-P2	GAGGCTGCAACACATCAAGT	1	Guk1_+_59187684.23-P2	GGTAGGTGGGTGCCATCCTG	2	Guk1_+_59187701.23-P2|Guk1_+_59187684.23-P2
Gm21119	ENSMUST00000178438.1	Gm21119_-_20615468.23-ENSMUST00000178438.1	GCAGGGCCACATCCTAATGG	1	Gm21119_+_20615494.23-ENSMUST00000178438.1	GACAATGTAGGGGACCCCAG	2	Gm21119_-_20615468.23-ENSMUST00000178438.1|Gm21119_+_20615494.23-ENSMUST00000178438.1
Dis3l2	P1P2	Dis3l2_-_86703871.23-P1P2	GGCCGGCCTCCCGGGAGCGA	1	Dis3l2_-_86703876.23-P1P2	GCCTCCCGGGAGCGACGGTG	2	Dis3l2_-_86703871.23-P1P2|Dis3l2_-_86703876.23-P1P2
Il4ra	P1P2	Il4ra_-_125552328.23-P1P2	GGCGTGGAGCCTGAACTCGC	1	Il4ra_-_125552341.23-P1P2	GACTCGCAGGTAGGAACGGG	2	Il4ra_-_125552328.23-P1P2|Il4ra_-_125552341.23-P1P2
Spef2	P1P2	Spef2_-_9748816.23-P1P2	GCAGGTGCTAGGAACTTTCC	1	Spef2_-_9748597.23-P1P2	GGGCTAGGTAGCACTGAGGA	2	Spef2_-_9748816.23-P1P2|Spef2_-_9748597.23-P1P2
Tiprl	P1P2	Tiprl_+_165236924.23-P1P2	GGGCGGGGCCGAGATGGTAA	1	Tiprl_-_165236882.23-P1P2	GGAGCAAGCGCCTGCGGCAG	2	Tiprl_+_165236924.23-P1P2|Tiprl_-_165236882.23-P1P2
Pcdh20	ENSMUST00000061628.5	Pcdh20_+_88471163.23-ENSMUST00000061628.5	GTTGGTGGGTTGTCCAGGAG	1	Pcdh20_-_88471029.23-ENSMUST00000061628.5	GCAGAGCGCTCCAGAAGGGA	2	Pcdh20_+_88471163.23-ENSMUST00000061628.5|Pcdh20_-_88471029.23-ENSMUST00000061628.5
Zfp784	P1P2	Zfp784_-_5038372.23-P1P2	GGGGATGGCGACTCCCGGGT	1	Zfp784_-_5038390.23-P1P2	GTCGGTGAGCTCGGAATCGG	2	Zfp784_-_5038372.23-P1P2|Zfp784_-_5038390.23-P1P2
Synpo2l	P1	Synpo2l_-_20664470.23-P1	GTGGCCGAGGGGCTCTTGGA	1	Synpo2l_-_20664473.23-P1	GCCGAGGGGCTCTTGGATGG	2	Synpo2l_-_20664470.23-P1|Synpo2l_-_20664473.23-P1
Ttc34	P1P2	Ttc34_+_154856256.23-P1P2	GTAGTCCAGCGCGCCCAGGA	1	Ttc34_-_154856265.23-P1P2	GTGGCGGGTAGCGCCTTCCT	2	Ttc34_+_154856256.23-P1P2|Ttc34_-_154856265.23-P1P2
Gzmg	P1P2	Gzmg_-_56159268.23-P1P2	GAACAACTGGGAGAATCTAG	1	Gzmg_+_56159133.23-P1P2	GTAATGACCAGTCTGCAATG	2	Gzmg_-_56159268.23-P1P2|Gzmg_+_56159133.23-P1P2
Megf9	P1P2	Megf9_+_70534895.23-P1P2	GGCGATGGTGCTCTTGGTGG	1	Megf9_-_70534766.23-P1P2	GGCGGCCGCGCAGCACAACA	2	Megf9_+_70534895.23-P1P2|Megf9_-_70534766.23-P1P2
Olfr1044	ENSMUST00000099906.1	Olfr1044_-_86171375.23-ENSMUST00000099906.1	GAGGAAGCTGTAGCTATAGG	1	Olfr1044_-_86171767.23-ENSMUST00000099906.1	GCAGCTCCTCGCGATCTGTG	2	Olfr1044_-_86171375.23-ENSMUST00000099906.1|Olfr1044_-_86171767.23-ENSMUST00000099906.1
Ces2a	P1P2	Ces2a_-_104734212.23-P1P2	GCCCAGTTCGGCAAAGTCAG	1	Ces2a_-_104734257.23-P1P2	GCCAGGAAGGGAAAAGGAGC	2	Ces2a_-_104734212.23-P1P2|Ces2a_-_104734257.23-P1P2
Metap2	P1P2	Metap2_-_93889744.23-P1P2	GgagagggagcgagaACGAG	1	Metap2_+_93889767.23-P1P2	GCCGGCGTCGCTGGTGGAGG	2	Metap2_-_93889744.23-P1P2|Metap2_+_93889767.23-P1P2
Drg1	P1P2	Drg1_-_3266314.23-P1P2	GGCTAAGGTCCCGCTCATGG	1	Drg1_+_3266338.23-P1P2	GGGGGACCTAACCAGTGTGG	2	Drg1_-_3266314.23-P1P2|Drg1_+_3266338.23-P1P2
Slc2a12	P1P2	Slc2a12_-_22645155.23-P1P2	GCTGTCAGCGCGGTAGGTCT	1	Slc2a12_-_22645166.23-P1P2	GGTAGGTCTGGGTGGTCCGG	2	Slc2a12_-_22645155.23-P1P2|Slc2a12_-_22645166.23-P1P2
Amotl2	P1P2	Amotl2_+_102717819.23-P1P2	GGGAGGTGCGCACTAGTCGG	1	Amotl2_+_102717860.23-P1P2	GGGCGCACGCAGACCCGGTT	2	Amotl2_+_102717819.23-P1P2|Amotl2_+_102717860.23-P1P2
Gpr83	P1P2	Gpr83_-_14860255.23-P1P2	GCGCCACCGAGGACCGAGGT	1	Gpr83_-_14860251.23-P1P2	GCGAGCGCCACCGAGGACCG	2	Gpr83_-_14860255.23-P1P2|Gpr83_-_14860251.23-P1P2
Zfp941	P1P2	Zfp941_-_140822094.23-P1P2	GGCCTCTGGGACCAGATCAC	1	Zfp941_+_140822074.23-P1P2	GTCCTGTGATCTGGTCCCAG	2	Zfp941_-_140822094.23-P1P2|Zfp941_+_140822074.23-P1P2
Commd7	P1P2	Commd7_+_153632719.23-P1P2	GAAGCGCAGCGAGACCCGGG	1	Commd7_+_153632722.23-P1P2	GCGGAAGCGCAGCGAGACCC	2	Commd7_+_153632719.23-P1P2|Commd7_+_153632722.23-P1P2
Slc6a13	P1P2	Slc6a13_-_121300312.23-P1P2	GAATTCTCCGACAAGACCTC	1	Slc6a13_-_121300533.23-P1P2	GCTTAAGGGTGACAGAGGAG	2	Slc6a13_-_121300312.23-P1P2|Slc6a13_-_121300533.23-P1P2
Ptpro	P1P2	Ptpro_-_137252537.23-P1P2	GAGGAGAGCGATCCATCCGG	1	Ptpro_-_137252518.23-P1P2	GCAGGACTCGGGCACAGAAG	2	Ptpro_-_137252537.23-P1P2|Ptpro_-_137252518.23-P1P2
Ropn1	P2	Ropn1_+_34651287.23-P2	GAAAGCCTGGAAGTCTAAGT	1	Ropn1_-_34651229.23-P2	GAGACAGTAAGTAAGTGGAG	2	Ropn1_+_34651287.23-P2|Ropn1_-_34651229.23-P2
Reep6	P1P2	Reep6_+_80330228.23-P1P2	GCGCTGGCGCAGACCGTCCA	1	Reep6_-_80330237.23-P1P2	GCGCCCGCCGCTGCCATGGA	2	Reep6_+_80330228.23-P1P2|Reep6_-_80330237.23-P1P2
Eif5b	P1P2	Eif5b_+_37998135.23-P1P2	GAGACCCGCGCACTGGGACA	1	Eif5b_-_37998178.23-P1P2	GGTGGAGAGCCGGGTGCGAG	2	Eif5b_+_37998135.23-P1P2|Eif5b_-_37998178.23-P1P2
G6pdx	P1P2	G6pdx_-_74428885.23-P1P2	GGCGCACAGCCAGTTTCCGG	1	G6pdx_+_74428821.23-P1P2	GGGCAGCGGCAACTAAACTC	2	G6pdx_-_74428885.23-P1P2|G6pdx_+_74428821.23-P1P2
Crtc1	P1P2	Crtc1_+_70439605.23-P1P2	GGGTGGCTCCCGAGAGTGGG	1	Crtc1_+_70439534.23-P1P2	GGGCGACTTCGAACAATCCG	2	Crtc1_+_70439605.23-P1P2|Crtc1_+_70439534.23-P1P2
Vmn1r216	ENSMUST00000080253.2	Vmn1r216_+_23099119.23-ENSMUST00000080253.2	GACTAGGAAAAAACCTTAGA	1	Vmn1r216_-_23099179.23-ENSMUST00000080253.2	GTTTGGAGTGATCTCGTCCA	2	Vmn1r216_+_23099119.23-ENSMUST00000080253.2|Vmn1r216_-_23099179.23-ENSMUST00000080253.2
Ankrd36	P1	Ankrd36_-_5569705.23-P1	GGTCCTGCCAACTGCCTAAG	1	Ankrd36_-_5569712.23-P1	GCAACTGCCTAAGAGGTGGA	2	Ankrd36_-_5569705.23-P1|Ankrd36_-_5569712.23-P1
Esm1	P1P2	Esm1_-_113209810.23-P1P2	GCCTCCAGCAAAGACCACGA	1	Esm1_-_113209996.23-P1P2	GGGACAGTGCTGGATGACTG	2	Esm1_-_113209810.23-P1P2|Esm1_-_113209996.23-P1P2
H2-DMa	P1	H2-DMa_-_34135660.23-P1	GGGTAGCTCCCATTTACTGT	1	H2-DMa_-_34135673.23-P1	GTACTGTGGGTGTTAAGGTA	2	H2-DMa_-_34135660.23-P1|H2-DMa_-_34135673.23-P1
Dapk1	P1P2	Dapk1_-_60602034.23-P1P2	GCTGCGCCCGACGCAAGGAG	1	Dapk1_-_60601974.23-P1P2	GCGAGCGCAGCGGAGGAGGA	2	Dapk1_-_60602034.23-P1P2|Dapk1_-_60601974.23-P1P2
Vmn2r9	ENSMUST00000170419.1	Vmn2r9_-_108852244.23-ENSMUST00000170419.1	GGAGGGCAGAACCTCACAGT	1	Vmn2r9_+_108852108.23-ENSMUST00000170419.1	GTTACTACAATGGATTGTGA	2	Vmn2r9_-_108852244.23-ENSMUST00000170419.1|Vmn2r9_+_108852108.23-ENSMUST00000170419.1
Fhl1	ENSMUST00000114772.2	Fhl1_+_56779746.23-ENSMUST00000114772.2	GCAGAGGCCAAGTTCAGGAG	1	Fhl1_-_56779722.23-ENSMUST00000114772.2	GGCCAAAGCGTTATCATCTG	2	Fhl1_+_56779746.23-ENSMUST00000114772.2|Fhl1_-_56779722.23-ENSMUST00000114772.2
Fbln1	P1P2	Fbln1_+_85206063.23-P1P2	GACACGCTCGAGCCAGGCCT	1	Fbln1_+_85206097.23-P1P2	GCCGGCGGCGGACAAAGGCA	2	Fbln1_+_85206063.23-P1P2|Fbln1_+_85206097.23-P1P2
Gpr149	P1P2	Gpr149_-_62605096.23-P1P2	GagagagagaggagaTATAC	1	Gpr149_-_62604986.23-P1P2	GTGCTCAGAGCTGGATTCAA	2	Gpr149_-_62605096.23-P1P2|Gpr149_-_62604986.23-P1P2
Phka2	P1P2	Phka2_+_160502515.23-P1P2	GGCTCGACAGAACCTAGACT	1	Phka2_-_160502485.23-P1P2	GGCCGCCTCCCAAAACAGAG	2	Phka2_+_160502515.23-P1P2|Phka2_-_160502485.23-P1P2
Bhlhe22	P1P2	Bhlhe22_+_18054409.23-P1P2	GCAGCCGCCGCCACAGACGG	1	Bhlhe22_-_18054516.23-P1P2	GGCGGGATTGGACTCAGAGG	2	Bhlhe22_+_18054409.23-P1P2|Bhlhe22_-_18054516.23-P1P2
9130401M01Rik	ENSMUST00000100655.3	9130401M01Rik_-_58034323.23-ENSMUST00000100655.3	GGGCAAGGTAGAGTGTAGAG	1	9130401M01Rik_-_58034303.23-ENSMUST00000100655.3	GAGCCGCGCCAAGGCTGCCG	2	9130401M01Rik_-_58034323.23-ENSMUST00000100655.3|9130401M01Rik_-_58034303.23-ENSMUST00000100655.3
Defb10	ENSMUST00000054162.3	Defb10_-_21859047.23-ENSMUST00000054162.3	GAGATGCAGAAAACTGAAGC	1	Defb10_+_21859010.23-ENSMUST00000054162.3	GGCATCTCCATGTCCTGAGC	2	Defb10_-_21859047.23-ENSMUST00000054162.3|Defb10_+_21859010.23-ENSMUST00000054162.3
Noxo1	P2	Noxo1_-_24696530.23-P2	GTGGCTCAGACACCTAAGGG	1	Noxo1_-_24696320.23-P2	GcaggccgaggcggCACTGG	2	Noxo1_-_24696530.23-P2|Noxo1_-_24696320.23-P2
Tmed11	P1P2	Tmed11_-_108795363.23-P1P2	GCTTGAATAGGAGCAGTTAA	1	Tmed11_+_108795106.23-P1P2	GAATGCTAATTAATCTCCAG	2	Tmed11_-_108795363.23-P1P2|Tmed11_+_108795106.23-P1P2
Ptprk	P1P2	Ptprk_+_28074851.23-P1P2	GCGCTCTCCATGCTAGGCAG	1	Ptprk_+_28075078.23-P1P2	GGCAGCGGCCGCCACATCCA	2	Ptprk_+_28074851.23-P1P2|Ptprk_+_28075078.23-P1P2
Poglut1	P1P2	Poglut1_+_38550154.23-P1P2	GCTGCGGGTGATGGAGCGTC	1	Poglut1_-_38550185.23-P1P2	GCATCACCCGCAGACCACTG	2	Poglut1_+_38550154.23-P1P2|Poglut1_-_38550185.23-P1P2
Krtap22-2	P1P2	Krtap22-2_-_89010556.23-P1P2	GCATGGGCGATAGGTACTGT	1	Krtap22-2_+_89010697.23-P1P2	GTTCCTGACAGCATGTGCTA	2	Krtap22-2_-_89010556.23-P1P2|Krtap22-2_+_89010697.23-P1P2
Ahrr	P1P2	Ahrr_+_74292264.23-P1P2	GGCCTCCGCGGCTCCCTCAG	1	Ahrr_-_74292258.23-P1P2	GAGGCGGGGCGCAGAAGATC	2	Ahrr_+_74292264.23-P1P2|Ahrr_-_74292258.23-P1P2
Bsx	P1P2	Bsx_+_40874031.23-P1P2	GTACGGACCTGGGCTATCCC	1	Bsx_-_40874016.23-P1P2	GACCTACCCCGGCGCTGGAG	2	Bsx_+_40874031.23-P1P2|Bsx_-_40874016.23-P1P2
Pds5b	P1P2	Pds5b_-_150673936.23-P1P2	GGGAGGAGCGCGAGGAGTGT	1	Pds5b_-_150673968.23-P1P2	GCCGGAGGTAGGAGCGACTC	2	Pds5b_-_150673936.23-P1P2|Pds5b_-_150673968.23-P1P2
Them6	P1P2	Them6_+_74721267.23-P1P2	GCAGCGGGCACCTGGTGTCC	1	Them6_-_74721279.23-P1P2	GCAGCGGGCTCCTGGACACC	2	Them6_+_74721267.23-P1P2|Them6_-_74721279.23-P1P2
Mif4gd	P1P2	Mif4gd_+_115612882.23-P1P2	GGCAAGGGATATGGTGACCC	1	Mif4gd_-_115612922.23-P1P2	GTGCCCCGCTCAGGTGAACT	2	Mif4gd_+_115612882.23-P1P2|Mif4gd_-_115612922.23-P1P2
Idh3a	P1	Idh3a_-_54586510.23-P1	GGTCGCCGCGGTGAGGGAAG	1	Idh3a_-_54586534.23-P1	GGCGATGGCCGGGTCCGCGT	2	Idh3a_-_54586510.23-P1|Idh3a_-_54586534.23-P1
Ace3	P1P2	Ace3_+_105994706.23-P1P2	GCAAGAGTTGCCGGTGAGAG	1	Ace3_+_105994728.23-P1P2	GCTCCCACAGTCCTGAGCCA	2	Ace3_+_105994706.23-P1P2|Ace3_+_105994728.23-P1P2
Pyroxd2	P1P2	Pyroxd2_+_42752432.23-P1P2	GGGCGGCCGAGGTCTCATCA	1	Pyroxd2_-_42752242.23-P1P2	GCAGGTCGTGCCCATAGGAG	2	Pyroxd2_+_42752432.23-P1P2|Pyroxd2_-_42752242.23-P1P2
Arhgef1	P2	Arhgef1_-_24904506.23-P2	GCCCATCCGACAGGTGAGAT	1	Arhgef1_-_24904472.23-P2	GTCGGTTCCTGAGGCTGCAG	2	Arhgef1_-_24904506.23-P2|Arhgef1_-_24904472.23-P2
Dcpp2	P1P2	Dcpp2_-_23898897.23-P1P2	GACTGATTCTTGCCTTCTTG	1	Dcpp2_-_23899186.23-P1P2	GCACAACCCAGGAGACACGG	2	Dcpp2_-_23898897.23-P1P2|Dcpp2_-_23899186.23-P1P2
Gpr155	P1P2	Gpr155_-_73386418.23-P1P2	GCACGTTCCGAGAAAGGGAG	1	Gpr155_+_73386423.23-P1P2	GGTAGCTGACAGGACCGCAG	2	Gpr155_-_73386418.23-P1P2|Gpr155_+_73386423.23-P1P2
Wisp3	ENSMUST00000076713.4	Wisp3_+_39163751.23-ENSMUST00000076713.4	GACTGGGACAGATCCTCAGA	1	Wisp3_+_39163736.23-ENSMUST00000076713.4	GCAGACGGAAAGTGCAACCC	2	Wisp3_+_39163751.23-ENSMUST00000076713.4|Wisp3_+_39163736.23-ENSMUST00000076713.4
Lpxn	P1P2	Lpxn_+_12798586.23-P1P2	GGTGAAGAAGAGGACCACAA	1	Lpxn_-_12798669.23-P1P2	GCATCGCAGGTATAGGACAA	2	Lpxn_+_12798586.23-P1P2|Lpxn_-_12798669.23-P1P2
Txn1	P1P2	Txn1_+_57956016.23-P1P2	GGTACGGGAGATGCACTCGT	1	Txn1_-_57956283.23-P1P2	GATGGATCCAAGGCGCCCAA	2	Txn1_+_57956016.23-P1P2|Txn1_-_57956283.23-P1P2
Tmprss13	P1P2	Tmprss13_+_45319076.23-P1P2	GTCGAGGGTAAGATCCATGT	1	Tmprss13_-_45319075.23-P1P2	GCCACACGCTGGGGGACTGG	2	Tmprss13_+_45319076.23-P1P2|Tmprss13_-_45319075.23-P1P2
Nav1	P1P2	Nav1_+_135688096.23-P1P2	GCCGCGGCCGCCCTAGTGAG	1	Nav1_-_135688108.23-P1P2	GGGCCTTCAGCCTCTCACTA	2	Nav1_+_135688096.23-P1P2|Nav1_-_135688108.23-P1P2
Plekhf1	P1P2	Plekhf1_+_38227920.23-P1P2	GAGGTAAGCAGGCTACGGAG	1	Plekhf1_-_38227949.23-P1P2	GTAGCCTGCTTACCTCCCGT	2	Plekhf1_+_38227920.23-P1P2|Plekhf1_-_38227949.23-P1P2
Hcrtr1	P1P2	Hcrtr1_+_130139126.23-P1P2	GGGACCACGCAGCCACTGAG	1	Hcrtr1_+_130139104.23-P1P2	GACAGCGCCGCCTCAGGAGG	2	Hcrtr1_+_130139126.23-P1P2|Hcrtr1_+_130139104.23-P1P2
Atp9a	P1P2	Atp9a_-_168741907.23-P1P2	GgcccgcgcggcccgACCGA	1	Atp9a_-_168741852.23-P1P2	Gggccgggcccgcagcgcag	2	Atp9a_-_168741907.23-P1P2|Atp9a_-_168741852.23-P1P2
Ralb	P1P2	Ralb_+_119504585.23-P1P2	GAGCCAGAGCGGCGGTGGGA	1	Ralb_+_119504596.23-P1P2	GGTTGTGCGCATAGCCAGAG	2	Ralb_+_119504585.23-P1P2|Ralb_+_119504596.23-P1P2
Ppil1	P1P2	Ppil1_-_29263893.23-P1P2	GTAGTCTCCAGGTAGACGTT	1	Ppil1_+_29263864.23-P1P2	GCTACCTGGAGACTAGGTGA	2	Ppil1_-_29263893.23-P1P2|Ppil1_+_29263864.23-P1P2
Grxcr2	P1P2	Grxcr2_+_41999015.23-P1P2	GGGAGGCCTGGAAACCTGAG	1	Grxcr2_+_41999032.23-P1P2	GGTTTCACTGGGCTACTCGG	2	Grxcr2_+_41999015.23-P1P2|Grxcr2_+_41999032.23-P1P2
Prss34	P1P2	Prss34_+_25298438.23-P1P2	GCGGCAGCCAGGAGACCTGA	1	Prss34_+_25298423.23-P1P2	GCTGAGGGCAGAGGTGCTAA	2	Prss34_+_25298438.23-P1P2|Prss34_+_25298423.23-P1P2
Olfr403	ENSMUST00000076675.1	Olfr403_+_74195915.23-ENSMUST00000076675.1	GCCAGCAGGACACAAAGTTG	1	Olfr403_+_74195724.23-ENSMUST00000076675.1	GATCTTGGGAATAGTTACAG	2	Olfr403_+_74195915.23-ENSMUST00000076675.1|Olfr403_+_74195724.23-ENSMUST00000076675.1
Galnt11	P2	Galnt11_-_25247435.23-P2	GGAGTGTTCTAGGTCTAACA	1	Galnt11_+_25247658.23-P2	GTGGACCTCGAGTGAAACGT	2	Galnt11_-_25247435.23-P2|Galnt11_+_25247658.23-P2
Mrpl49	P1P2	Mrpl49_-_6057688.23-P1P2	GTCGCCCGTAGCTCCGACCG	1	Mrpl49_+_6057732.23-P1P2	GCTCAGTTGAGGCGCCAAGA	2	Mrpl49_-_6057688.23-P1P2|Mrpl49_+_6057732.23-P1P2
Brat1	P1P2	Brat1_-_140705080.23-P1P2	GCGGGGTGGAGATCCTGGTA	1	Brat1_-_140705066.23-P1P2	GAGGCGCACGCAGGCCGGGG	2	Brat1_-_140705080.23-P1P2|Brat1_-_140705066.23-P1P2
Atxn1l	P1P2	Atxn1l_+_109737500.23-P1P2	GCCGCGGGCCCCCTAAACAG	1	Atxn1l_+_109737649.23-P1P2	GGACGAGCGGGAGGAGTCCT	2	Atxn1l_+_109737500.23-P1P2|Atxn1l_+_109737649.23-P1P2
Rcbtb2	P1P2	Rcbtb2_+_73143018.23-P1P2	Ggagcgagaagagaaaccag	1	Rcbtb2_+_73142537.23-P1P2	Ggcaccaacagaaagtagag	2	Rcbtb2_+_73143018.23-P1P2|Rcbtb2_+_73142537.23-P1P2
Rassf2	P1P2	Rassf2_-_132029803.23-P1P2	GCGCAGGGGTTGGAAAGTGG	1	Rassf2_+_132029841.23-P1P2	GAGCGGGTCCCGCGGATCAC	2	Rassf2_-_132029803.23-P1P2|Rassf2_+_132029841.23-P1P2
Fam109b	P1P2	Fam109b_-_82341227.23-P1P2	GCAGAGCGAGAAAGCCCAGG	1	Fam109b_+_82341422.23-P1P2	GCTTTGTGGGCCCCAAGGAG	2	Fam109b_-_82341227.23-P1P2|Fam109b_+_82341422.23-P1P2
Spsb1	P1P2	Spsb1_+_149954711.23-P1P2	GCAGAGCGTGGGCATAGGGT	1	Spsb1_+_149954993.23-P1P2	GCGCAGGAGTCGCGCTCGAG	2	Spsb1_+_149954711.23-P1P2|Spsb1_+_149954993.23-P1P2
Acot4	P1P2	Acot4_+_84038410.23-P1P2	GTCTAGGACCCAGACAAGAG	1	Acot4_-_84038407.23-P1P2	GCCAAATTGCTGACAGATCA	2	Acot4_+_84038410.23-P1P2|Acot4_-_84038407.23-P1P2
Mapk15	P2	Mapk15_+_75996800.23-P2	GGCCATGCCCCTCTCCGTAA	1	Mapk15_-_75996815.23-P2	GGAGCATCCCTTACGGAGAG	2	Mapk15_+_75996800.23-P2|Mapk15_-_75996815.23-P2
Mettl15	P1	Mettl15_-_109278284.23-P1	GACACCTAAGTCCCGAGTGG	1	Mettl15_-_109278095.23-P1	GAGTACACCGGAGGGGACGG	2	Mettl15_-_109278284.23-P1|Mettl15_-_109278095.23-P1
Il13ra2	P1P2	Il13ra2_-_147403782.23-P1P2	GGAGAGAGGTCACTGTTCAG	1	Il13ra2_-_147403768.23-P1P2	GCAAAGCACTGTCTTGAGAG	2	Il13ra2_-_147403782.23-P1P2|Il13ra2_-_147403768.23-P1P2
D10Bwg1379e	P1P2	D10Bwg1379e_-_18743691.23-P1P2	GGGACGCGCCTAGGAGGCCT	1	D10Bwg1379e_-_18743671.23-P1P2	GCGACCCCGAGATCGCGCAG	2	D10Bwg1379e_-_18743691.23-P1P2|D10Bwg1379e_-_18743671.23-P1P2
Olfr1057	ENSMUST00000099892.1	Olfr1057_-_86375117.23-ENSMUST00000099892.1	GAGGAATCCTCCAAGCTGCG	1	Olfr1057_+_86375102.23-ENSMUST00000099892.1	GAATGTGCCACGCAGCTTGG	2	Olfr1057_-_86375117.23-ENSMUST00000099892.1|Olfr1057_+_86375102.23-ENSMUST00000099892.1
Tmsb15a	P1P2	Tmsb15a_+_135720583.23-P1P2	GGAGCTGTTGGTCTGATAGG	1	Tmsb15a_+_135720586.23-P1P2	GACAGAGCTGTTGGTCTGAT	2	Tmsb15a_+_135720583.23-P1P2|Tmsb15a_+_135720586.23-P1P2
Dtx4	P1P2	Dtx4_+_12502093.23-P1P2	GGACGAGGATGAGGTAATAA	1	Dtx4_+_12502082.23-P1P2	GGGTAATAACGGACAGAACA	2	Dtx4_+_12502093.23-P1P2|Dtx4_+_12502082.23-P1P2
Kcnj3	P1	Kcnj3_+_55437188.23-P1	GGTGCAGACATAATACGGAG	1	Kcnj3_+_55437193.23-P1	GTCGGAGTGCAGACATAATA	2	Kcnj3_+_55437188.23-P1|Kcnj3_+_55437193.23-P1
Man1a2	P1P2	Man1a2_-_100685420.23-P1P2	GCCCTCAGCCGAGGCCGCGA	1	Man1a2_-_100685426.23-P1P2	GGCCGAGGCCGCGAGGGCGA	2	Man1a2_-_100685420.23-P1P2|Man1a2_-_100685426.23-P1P2
Gmnn	P1P2	Gmnn_-_24761862.23-P1P2	GTGAGAGCCGCACAAGGCCC	1	Gmnn_+_24761916.23-P1P2	GGGCGCGTCAGCTACCGGGT	2	Gmnn_-_24761862.23-P1P2|Gmnn_+_24761916.23-P1P2
Olfr784	ENSMUST00000082342.2	Olfr784_+_129388098.23-ENSMUST00000082342.2	GGAGTCCCAAGAGTAAAGGG	1	Olfr784_-_129388083.23-ENSMUST00000082342.2	GTCTCAGCTCTTGGGTTACT	2	Olfr784_+_129388098.23-ENSMUST00000082342.2|Olfr784_-_129388083.23-ENSMUST00000082342.2
Wdr34	P1P2	Wdr34_-_30048850.23-P1P2	GCAACGCGCCGAAAAGGCCT	1	Wdr34_+_30048805.23-P1P2	GAGCGCTGGAGCTGCTGCCC	2	Wdr34_-_30048850.23-P1P2|Wdr34_+_30048805.23-P1P2
Ndufaf5	P1P2	Ndufaf5_+_140170686.23-P1P2	GCAGCCCGGGCGCCACAGCA	1	Ndufaf5_+_140170743.23-P1P2	GCGCTGGCCGGCCAAGCAGT	2	Ndufaf5_+_140170686.23-P1P2|Ndufaf5_+_140170743.23-P1P2
Tex37	P1P2	Tex37_+_70918882.23-P1P2	GCATACAGCTGGGGCACCTG	1	Tex37_+_70918873.23-P1P2	GGGGGCACCTGGGGTTGAAA	2	Tex37_+_70918882.23-P1P2|Tex37_+_70918873.23-P1P2
Olfr1511	ENSMUST00000078171.1	Olfr1511_+_52390320.23-ENSMUST00000078171.1	GAAGTTGTGCACAATTCTAG	1	Olfr1511_-_52390521.23-ENSMUST00000078171.1	GTGAAGTTTAATATAATCCG	2	Olfr1511_+_52390320.23-ENSMUST00000078171.1|Olfr1511_-_52390521.23-ENSMUST00000078171.1
Mras	P1P2	Mras_+_99436691.23-P1P2	GGCGCGGAGCCGTCAGTcgg	1	Mras_-_99436445.23-P1P2	GAGCCAGAGCCGGTGGTAGG	2	Mras_+_99436691.23-P1P2|Mras_-_99436445.23-P1P2
Cep135	P1P2	Cep135_+_76588741.23-P1P2	GCCGGAGCGGCCCACAGTgg	1	Cep135_-_76588725.23-P1P2	GGCCGAAAGCCGCCATCTcc	2	Cep135_+_76588741.23-P1P2|Cep135_-_76588725.23-P1P2
Prss30	P1P2	Prss30_-_23975181.23-P1P2	GCACCTTGCCCGGGACTCCA	1	Prss30_+_23975184.23-P1P2	GACTGCGTTGTGGACCGGAG	2	Prss30_-_23975181.23-P1P2|Prss30_+_23975184.23-P1P2
Zfp507	P1P2	Zfp507_+_35802954.23-P1P2	GTGGAGCCACGGCCGAGGAA	1	Zfp507_+_35802943.23-P1P2	GCCGAGGAAGGGGCAAAAAG	2	Zfp507_+_35802954.23-P1P2|Zfp507_+_35802943.23-P1P2
Cycs	P1P2	Cycs_+_50566535.23-P1P2	GCGCACGTCGGGCCGCGGAC	1	Cycs_+_50566521.23-P1P2	GCGGACGGGCGGAACAAGTG	2	Cycs_+_50566535.23-P1P2|Cycs_+_50566521.23-P1P2
Scn3b	P1P2	Scn3b_-_40269244.23-P1P2	GGAGCTGCCTGCGCATGTCA	1	Scn3b_+_40269272.23-P1P2	GATCAAGCCGCCCCTCTCCA	2	Scn3b_-_40269244.23-P1P2|Scn3b_+_40269272.23-P1P2
Psd4	P1	Psd4_+_24385358.23-P1	GCTCAATTCAGCCCAGGACT	1	Psd4_-_24385369.23-P1	GCCAACCTAAACCTAGTCCT	2	Psd4_+_24385358.23-P1|Psd4_-_24385369.23-P1
Hipk1	P1P2	Hipk1_+_103791244.23-P1P2	GCCGTGGCCCCGGACCGCAG	1	Hipk1_+_103791286.23-P1P2	GTCGGGTCTGGTGACAACGG	2	Hipk1_+_103791244.23-P1P2|Hipk1_+_103791286.23-P1P2
Tlr11	ENSMUST00000185091.1	Tlr11_+_50358008.23-ENSMUST00000185091.1	GCTTACCTTTGAGCATGGGG	1	Tlr11_-_50358157.23-ENSMUST00000185091.1	GCAAAGATCAGGGCCAGTGG	2	Tlr11_+_50358008.23-ENSMUST00000185091.1|Tlr11_-_50358157.23-ENSMUST00000185091.1
Olfr138	ENSMUST00000071871.4	Olfr138_+_38275161.23-ENSMUST00000071871.4	GGTTCATAATGAGAGTGTAG	1	Olfr138_+_38275023.23-ENSMUST00000071871.4	GGGTTTTTCTGGAGCTTCCC	2	Olfr138_+_38275161.23-ENSMUST00000071871.4|Olfr138_+_38275023.23-ENSMUST00000071871.4
Aim1	P1P2	Aim1_+_44004327.23-P1P2	GCGCCAGAGGAGCACCTCGT	1	Aim1_+_44004318.23-P1P2	GAGCACCTCGTGGGAGGAGT	2	Aim1_+_44004327.23-P1P2|Aim1_+_44004318.23-P1P2
Tmem205	P1P2	Tmem205_-_21927333.23-P1P2	GGCGTAGGGACCAAGAACCG	1	Tmem205_-_21927318.23-P1P2	GAGCACACGAGCTCAGGCGT	2	Tmem205_-_21927333.23-P1P2|Tmem205_-_21927318.23-P1P2
0610009D07Rik	P1P2	0610009D07Rik_-_4817813.23-P1P2	GGCGATGCAAGCGGCTAAGA	1	0610009D07Rik_+_4818002.23-P1P2	GGCCAGGGGGCTCTCAATAG	2	0610009D07Rik_-_4817813.23-P1P2|0610009D07Rik_+_4818002.23-P1P2
Olfr513	ENSMUST00000055146.1	Olfr513_+_108754931.23-ENSMUST00000055146.1	GCAGGAACACCACAAAGAGG	1	Olfr513_-_108754903.23-ENSMUST00000055146.1	GTAACAGAATTTGTCCTCAT	2	Olfr513_+_108754931.23-ENSMUST00000055146.1|Olfr513_-_108754903.23-ENSMUST00000055146.1
Dnah14	ENSMUST00000160345.1	Dnah14_+_181741048.23-ENSMUST00000160345.1	GGAGATGCAGAGTTGTAGAC	1	Dnah14_+_181741104.23-ENSMUST00000160345.1	GCACAAGAGAACATAAATAG	2	Dnah14_+_181741048.23-ENSMUST00000160345.1|Dnah14_+_181741104.23-ENSMUST00000160345.1
Vmn2r74	ENSMUST00000166355.1	Vmn2r74_-_85961035.23-ENSMUST00000166355.1	GTAATGGGAGTCTCTCTAAT	1	Vmn2r74_-_85961185.23-ENSMUST00000166355.1	GTTTGGTTATCTCCTAGCAA	2	Vmn2r74_-_85961035.23-ENSMUST00000166355.1|Vmn2r74_-_85961185.23-ENSMUST00000166355.1
Kcnk5	P1P2	Kcnk5_+_20181758.23-P1P2	GACTGTCGCGCGCGCAGAGG	1	Kcnk5_-_20181723.23-P1P2	GCTCTCGATCCTGAAGGGTA	2	Kcnk5_+_20181758.23-P1P2|Kcnk5_-_20181723.23-P1P2
Rhod	P1P2	Rhod_-_4439389.23-P1P2	GCGGTGCgcggagcagcagg	1	Rhod_-_4439399.23-P1P2	Gagcagcaggcggtacgcgg	2	Rhod_-_4439389.23-P1P2|Rhod_-_4439399.23-P1P2
Snrpd1	P1P2	Snrpd1_+_10617847.23-P1P2	GTTCAGGCTCCAGAGATCCA	1	Snrpd1_+_10617842.23-P1P2	GGCTCCAGAGATCCACGGAC	2	Snrpd1_+_10617847.23-P1P2|Snrpd1_+_10617842.23-P1P2
Lhb	P1	Lhb_+_45418382.23-P1	GGGCCCATATCGAAGAGCTA	1	Lhb_+_45418404.23-P1	GTTCAGAAATGGGAGACCAA	2	Lhb_+_45418382.23-P1|Lhb_+_45418404.23-P1
Hars	P1P2	Hars_+_36783056.23-P1P2	GAGGAGCTGGTACGACTCCA	1	Hars_+_36783108.23-P1P2	GGACAGCCGTCAGTTCCTGC	2	Hars_+_36783056.23-P1P2|Hars_+_36783108.23-P1P2
Vmn1r65	ENSMUST00000086338.1	Vmn1r65_+_6010936.23-ENSMUST00000086338.1	GCACAGTGAAGATCTTTGAG	1	Vmn1r65_-_6010804.23-ENSMUST00000086338.1	GAATACACTAGATCTTAGGA	2	Vmn1r65_+_6010936.23-ENSMUST00000086338.1|Vmn1r65_-_6010804.23-ENSMUST00000086338.1
Ak8	P1P2	Ak8_+_28700206.23-P1P2	GTCCGGGGGAATGCGATGAG	1	Ak8_+_28700220.23-P1P2	GCGTACTGAGGCATTTCCGG	2	Ak8_+_28700206.23-P1P2|Ak8_+_28700220.23-P1P2
Ifnlr1	P1P2	Ifnlr1_+_135686495.23-P1P2	GCCGCCGCAAGGCCCCTGGG	1	Ifnlr1_-_135686546.23-P1P2	GGACCCCAGGGACCGAAATG	2	Ifnlr1_+_135686495.23-P1P2|Ifnlr1_-_135686546.23-P1P2
Tmem210	P1P2	Tmem210_+_25288215.23-P1P2	GCAGACATATCAGGCCAAGG	1	Tmem210_+_25288187.23-P1P2	GGCTGGGCAGGATTCAGGCT	2	Tmem210_+_25288215.23-P1P2|Tmem210_+_25288187.23-P1P2
Tpbpa	P1P2	Tpbpa_-_60941828.23-P1P2	GTCTCCAGGGAGTTCCTCCA	1	Tpbpa_+_60941658.23-P1P2	GAAGTCTGAGCCTTGTTACA	2	Tpbpa_-_60941828.23-P1P2|Tpbpa_+_60941658.23-P1P2
H2-M11	ENSMUST00000041964.6	H2-M11_-_36547125.23-ENSMUST00000041964.6	GCTGCTGCTGCAGGTTCTGT	1	H2-M11_+_36547306.23-ENSMUST00000041964.6	GACAAACCCCAGGGATAAGT	2	H2-M11_-_36547125.23-ENSMUST00000041964.6|H2-M11_+_36547306.23-ENSMUST00000041964.6
D6Wsu163e	P1P2	D6Wsu163e_+_126940052.23-P1P2	GTGGGTCCTCCACACTGAAG	1	D6Wsu163e_-_126940026.23-P1P2	GCTTTGGTGTCTGATGAGAG	2	D6Wsu163e_+_126940052.23-P1P2|D6Wsu163e_-_126940026.23-P1P2
Hist1h3a	ENSMUST00000091701.2	Hist1h3a_-_23762393.23-ENSMUST00000091701.2	GGCTGGTGAGCACTTGGAGA	1	Hist1h3a_-_23762438.23-ENSMUST00000091701.2	GGTATGCAAAGGATAGTGAT	2	Hist1h3a_-_23762393.23-ENSMUST00000091701.2|Hist1h3a_-_23762438.23-ENSMUST00000091701.2
Usp30	P1P2	Usp30_+_114100343.23-P1P2	GATGAGGAGCCCAAGACAGG	1	Usp30_+_114100328.23-P1P2	GCAGGAGGCTCGCAAAGTGG	2	Usp30_+_114100343.23-P1P2|Usp30_+_114100328.23-P1P2
Bahd1	P1P2	Bahd1_+_118901689.23-P1P2	GTGGCCGGGCTGGAATCCGG	1	Bahd1_+_118901672.23-P1P2	GGGCGGCTGGAACCCCCCGG	2	Bahd1_+_118901689.23-P1P2|Bahd1_+_118901672.23-P1P2
Rpia	P1P2	Rpia_+_70791979.23-P1P2	GAGACCCGCGGCGACAAGGG	1	Rpia_+_70791982.23-P1P2	GCGGAGACCCGCGGCGACAA	2	Rpia_+_70791979.23-P1P2|Rpia_+_70791982.23-P1P2
Sbpl	P1P2	Sbpl_+_23955219.23-P1P2	GAGCCTGGTGCAGCCAGAGA	1	Sbpl_-_23955266.23-P1P2	GCTCTCCTCCATTCTTACCT	2	Sbpl_+_23955219.23-P1P2|Sbpl_-_23955266.23-P1P2
Gm7073	ENSMUST00000166562.2	Gm7073_-_60539185.23-ENSMUST00000166562.2	GTTGTGGATTGTGATTCTGT	1	Gm7073_-_60539151.23-ENSMUST00000166562.2	GCCATTATGGACAAGTATGG	2	Gm7073_-_60539185.23-ENSMUST00000166562.2|Gm7073_-_60539151.23-ENSMUST00000166562.2
Rnf10	P1P2	Rnf10_+_115272839.23-P1P2	GCAGCTCGGCCTCGGCCCAG	1	Rnf10_-_115272872.23-P1P2	GGGCCGAGCTGCTCCGGGAA	2	Rnf10_+_115272839.23-P1P2|Rnf10_-_115272872.23-P1P2
9430038I01Rik	P1P2	9430038I01Rik_-_137410743.23-P1P2	GCGCCTCTCAGGCCACTCGG	1	9430038I01Rik_+_137410724.23-P1P2	GCGCCTCCGAGTGGCCTGAG	2	9430038I01Rik_-_137410743.23-P1P2|9430038I01Rik_+_137410724.23-P1P2
Apba2	P1P2	Apba2_+_64502110.23-P1P2	GAGCCCGGGAAGCTGGATAG	1	Apba2_-_64502219.23-P1P2	GGCCTCGCCGACCCAGTCGG	2	Apba2_+_64502110.23-P1P2|Apba2_-_64502219.23-P1P2
Lipk	P1P2	Lipk_-_34008317.23-P1P2	GGCTGATAGGAAACTCTGGA	1	Lipk_-_34008431.23-P1P2	GTGGTATGTTAGTGAGACAT	2	Lipk_-_34008317.23-P1P2|Lipk_-_34008431.23-P1P2
Nfkbid	P1	Nfkbid_+_30421796.23-P1	GTGCAGACTGTGGGCCCCCA	1	Nfkbid_-_30421750.23-P1	GTAGATCGGGGACCCGGCGG	2	Nfkbid_+_30421796.23-P1|Nfkbid_-_30421750.23-P1
Ralbp1	P1P2	Ralbp1_+_65884805.23-P1P2	GTAAACAGGCGAAGGCTGGG	1	Ralbp1_-_65884426.23-P1P2	GAGCAACACAGGACACACCC	2	Ralbp1_+_65884805.23-P1P2|Ralbp1_-_65884426.23-P1P2
Rrad	P1P2	Rrad_+_104631204.23-P1P2	GAGGGTCTGAGTCTGAACAG	1	Rrad_+_104631222.23-P1P2	GGCAGTCGTGACAGCGACAA	2	Rrad_+_104631204.23-P1P2|Rrad_+_104631222.23-P1P2
Rtn4rl2	P1P2	Rtn4rl2_-_84887033.23-P1P2	GTGCTCGCCGAGGGAGAGTG	1	Rtn4rl2_-_84886984.23-P1P2	GGCGCGGCCCCGCAGGGAGT	2	Rtn4rl2_-_84887033.23-P1P2|Rtn4rl2_-_84886984.23-P1P2
Trim16	P1P2	Trim16_+_62820472.23-P1P2	GCTCTGCGGACTAAGGACTA	1	Trim16_-_62820507.23-P1P2	GCCGCAGAGCCTCCACCAGA	2	Trim16_+_62820472.23-P1P2|Trim16_-_62820507.23-P1P2
Adig	P1P2	Adig_+_158502697.23-P1P2	GCCACCTGGATTCAGCGGGA	1	Adig_+_158502751.23-P1P2	GCGCTCACCAGAGGCACCAG	2	Adig_+_158502697.23-P1P2|Adig_+_158502751.23-P1P2
4930568D16Rik	P1P2	4930568D16Rik_-_35367692.23-P1P2	GTACCAGCTCAGGTATTGTG	1	4930568D16Rik_+_35367673.23-P1P2	GTACCACACAATACCTGAGC	2	4930568D16Rik_-_35367692.23-P1P2|4930568D16Rik_+_35367673.23-P1P2
Car7	P1P2	Car7_-_104540848.23-P1P2	GACAGAGCGAGCGGACAGAA	1	Car7_-_104540839.23-P1P2	GGAGCCGCAGACAGAGCGAG	2	Car7_-_104540848.23-P1P2|Car7_-_104540839.23-P1P2
Defb20	P1P2	Defb20_+_152477093.23-P1P2	GGATCCTCCCGAGACAGCAG	1	Defb20_+_152477084.23-P1P2	GGAGACAGCAGGGGATCCTG	2	Defb20_+_152477093.23-P1P2|Defb20_+_152477084.23-P1P2
Rsph3a	P1P2	Rsph3a_+_7946030.23-P1P2	GCCGCTCTCGGAGAAACGGG	1	Rsph3a_+_7946033.23-P1P2	GACGCCGCTCTCGGAGAAAC	2	Rsph3a_+_7946030.23-P1P2|Rsph3a_+_7946033.23-P1P2
Mcm5	P1P2	Mcm5_-_75109649.23-P1P2	GAATTGCGGGACCCCGTCTA	1	Mcm5_+_75109638.23-P1P2	GGCGGGAGCTTCCCTAGACG	2	Mcm5_-_75109649.23-P1P2|Mcm5_+_75109638.23-P1P2
Tff3	P1P2	Tff3_+_31129555.23-P1P2	GCATGGAGACCAGAGCCCTC	1	Tff3_-_31129568.23-P1P2	GAGCATTAGCCAGAGGGCTC	2	Tff3_+_31129555.23-P1P2|Tff3_-_31129568.23-P1P2
Fut1	P1P2	Fut1_+_45617583.23-P1P2	GGAAGGCTCAGAGACCGGTG	1	Fut1_-_45617621.23-P1P2	GCCTTCAGTCAGTTTCAGGA	2	Fut1_+_45617583.23-P1P2|Fut1_-_45617621.23-P1P2
Tyrp1	P1P2	Tyrp1_+_80834246.23-P1P2	GAGATTCCTCACACTGGGAG	1	Tyrp1_-_80834419.23-P1P2	GCTGGTGAGCAGCTCTGTGG	2	Tyrp1_+_80834246.23-P1P2|Tyrp1_-_80834419.23-P1P2
Dgke	P1P2	Dgke_-_89060724.23-P1P2	GAGATCTGCGTGGGATGAGG	1	Dgke_+_89060686.23-P1P2	GGATCTCGCGGCCTGAGGGT	2	Dgke_-_89060724.23-P1P2|Dgke_+_89060686.23-P1P2
Arpc5	P1P2	Arpc5_-_152766645.23-P1P2	GGACGCCCCAGAGCGGAAGA	1	Arpc5_+_152766858.23-P1P2	GAGCGTAAGGATATTGCCGT	2	Arpc5_-_152766645.23-P1P2|Arpc5_+_152766858.23-P1P2
Muc4	P1P2	Muc4_-_32736355.23-P1P2	GGTGCTGTGGGGATTCCTGA	1	Muc4_+_32736328.23-P1P2	GGGAATCCCCACAGCACTTG	2	Muc4_-_32736355.23-P1P2|Muc4_+_32736328.23-P1P2
Prl8a8	P1P2	Prl8a8_-_27513110.23-P1P2	GCCAAGAGAGGAATAGGGGT	1	Prl8a8_-_27513106.23-P1P2	GTTTACCAAGAGAGGAATAG	2	Prl8a8_-_27513110.23-P1P2|Prl8a8_-_27513106.23-P1P2
Dnmt3b	P1P2	Dnmt3b_+_153649513.23-P1P2	GCAGGCGAGAGCGTCCACGC	1	Dnmt3b_+_153649471.23-P1P2	GGCGGCGACGAGGACGCTAC	2	Dnmt3b_+_153649513.23-P1P2|Dnmt3b_+_153649471.23-P1P2
Rqcd1	P1P2	Rqcd1_-_74506390.23-P1P2	GAGCCGCTGAAGCTGGGACG	1	Rqcd1_-_74506384.23-P1P2	GCATCAGAGCCGCTGAAGCT	2	Rqcd1_-_74506390.23-P1P2|Rqcd1_-_74506384.23-P1P2
Olfr672	ENSMUST00000050599.4	Olfr672_-_104996618.23-ENSMUST00000050599.4	GTGAGCTACACAGTCCCTAA	1	Olfr672_-_104996910.23-ENSMUST00000050599.4	GTGCCTGGTGACATGTTGTC	2	Olfr672_-_104996618.23-ENSMUST00000050599.4|Olfr672_-_104996910.23-ENSMUST00000050599.4
Rhno1	P1P2	Rhno1_+_128362859.23-P1P2	GCGCTCGGTGTCCTGAGGAg	1	Rhno1_+_128362856.23-P1P2	GTCGGTGTCCTGAGGAgcgg	2	Rhno1_+_128362859.23-P1P2|Rhno1_+_128362856.23-P1P2
Gpr35	P1P2	Gpr35_+_92973182.23-P1P2	GGAACCCCGTGGGAGACAGT	1	Gpr35_+_92973192.23-P1P2	GTACCTCTGTGGAACCCCGT	2	Gpr35_+_92973182.23-P1P2|Gpr35_+_92973192.23-P1P2
Gp49a	ENSMUST00000102894.3	Gp49a_+_51480834.23-ENSMUST00000102894.3	GGAACCAGAGGGCATCCCCT	1	Gp49a_-_51480852.23-ENSMUST00000102894.3	GCATCCTAGGGGATGCCCTC	2	Gp49a_+_51480834.23-ENSMUST00000102894.3|Gp49a_-_51480852.23-ENSMUST00000102894.3
Rnf123	P1P2	Rnf123_+_108079280.23-P1P2	GTGTTGTGAGCCGGTCGCGG	1	Rnf123_-_108079273.23-P1P2	GGCCGCCTCTCACTCACCCC	2	Rnf123_+_108079280.23-P1P2|Rnf123_-_108079273.23-P1P2
Sdhb	P1P2	Sdhb_+_140961450.23-P1P2	GAGGCCGACTCTGCCGAGAA	1	Sdhb_-_140961410.23-P1P2	GACGTCAGGAGCCAAAATGG	2	Sdhb_+_140961450.23-P1P2|Sdhb_-_140961410.23-P1P2
Dcaf11	P1P2	Dcaf11_-_55560529.23-P1P2	GCTGGCCGCCAGAAGCGTGA	1	Dcaf11_-_55560535.23-P1P2	GGCCAGAAGCGTGACGGACG	2	Dcaf11_-_55560529.23-P1P2|Dcaf11_-_55560535.23-P1P2
Pla2g4e	P1P2	Pla2g4e_-_120245177.23-P1P2	GcACTACGTAGTGCTAGACG	1	Pla2g4e_+_120245148.23-P1P2	GAGCACTACGTAGTgcgggg	2	Pla2g4e_-_120245177.23-P1P2|Pla2g4e_+_120245148.23-P1P2
Faim	P1P2	Faim_-_98986416.23-P1P2	GCGGAAGGCAGTAGGAGGCT	1	Faim_+_98986454.23-P1P2	GACGTAGTCAGCAGCTCTCG	2	Faim_-_98986416.23-P1P2|Faim_+_98986454.23-P1P2
Fbxl6	P1P2	Fbxl6_-_76538709.23-P1P2	GTAACTCGCCTAGAGGCCAC	1	Fbxl6_-_76538725.23-P1P2	GCACGGGAGCCATAGCCCCC	2	Fbxl6_-_76538709.23-P1P2|Fbxl6_-_76538725.23-P1P2
Desi2	P1P2	Desi2_-_178187729.23-P1P2	GTCTGGCCGGGTCCTCGTAC	1	Desi2_-_178187888.23-P1P2	GGCGGAGACCGAGCGGCTGG	2	Desi2_-_178187729.23-P1P2|Desi2_-_178187888.23-P1P2
Mtmr6	P1P2	Mtmr6_+_60265289.23-P1P2	GGCCTCAGGAGAGCACCATC	1	Mtmr6_+_60265277.23-P1P2	GCACCATCGGGAGAGAAACG	2	Mtmr6_+_60265289.23-P1P2|Mtmr6_+_60265277.23-P1P2
Olfr516	ENSMUST00000071410.1	Olfr516_-_108845623.23-ENSMUST00000071410.1	GTAATCACGGGGTAAGATAG	1	Olfr516_-_108845837.23-ENSMUST00000071410.1	GTTGCAGAAACAGGTACATA	2	Olfr516_-_108845623.23-ENSMUST00000071410.1|Olfr516_-_108845837.23-ENSMUST00000071410.1
Olfr998	ENSMUST00000052307.2	Olfr998_-_85590544.23-ENSMUST00000052307.2	GAACAGAACTCAACTTACAA	1	Olfr998_+_85590582.23-ENSMUST00000052307.2	GGAGATGATCTGTTAGGCCC	2	Olfr998_-_85590544.23-ENSMUST00000052307.2|Olfr998_+_85590582.23-ENSMUST00000052307.2
Rplp2	P1P2	Rplp2_-_141447741.23-P1P2	GCCGCCTGGGCCGCGAACAG	1	Rplp2_+_141447703.23-P1P2	GGGCGGCCAGGCTACTCACT	2	Rplp2_-_141447741.23-P1P2|Rplp2_+_141447703.23-P1P2
Stxbp6	P1P2	Stxbp6_-_45074399.23-P1P2	GGAGGGGTCGGGGAAACTCC	1	Stxbp6_-_45074291.23-P1P2	GCTGCCCCGCGCGGAGATCG	2	Stxbp6_-_45074399.23-P1P2|Stxbp6_-_45074291.23-P1P2
Hars2	P1P2	Hars2_-_36783260.23-P1P2	GTCAGGGAGCGTGAGATCCT	1	Hars2_+_36783288.23-P1P2	GAGCTGGAAACACCTGAGAT	2	Hars2_-_36783260.23-P1P2|Hars2_+_36783288.23-P1P2
Dhcr7	P1	Dhcr7_+_143830244.23-P1	GCCTGAGTGCGGAATCCAGG	1	Dhcr7_+_143830247.23-P1	GTCACCTGAGTGCGGAATCC	2	Dhcr7_+_143830244.23-P1|Dhcr7_+_143830247.23-P1
Nr2e1	P1P2	Nr2e1_-_42583548.23-P1P2	GGGGACAGCCGCGCACGCAG	1	Nr2e1_-_42583364.23-P1P2	GCCACACAGGCGTGCAGAGT	2	Nr2e1_-_42583548.23-P1P2|Nr2e1_-_42583364.23-P1P2
Trim6	P1P2	Trim6_-_104218866.23-P1P2	GAAGTCCTCGGCACTGATCC	1	Trim6_-_104218883.23-P1P2	GCCAGGCACGGATTCCAGAT	2	Trim6_-_104218866.23-P1P2|Trim6_-_104218883.23-P1P2
Eif1a	P1P2	Eif1a_-_46597737.23-P1P2	GGCCGGCCGTTGCCTAGGAA	1	Eif1a_-_46597772.23-P1P2	GTGCTCGTCCGGCTGTGACG	2	Eif1a_-_46597737.23-P1P2|Eif1a_-_46597772.23-P1P2
Eif3a	P1P2	Eif3a_-_60790582.23-P1P2	GTGGCCTGGACCGGGAGAGA	1	Eif3a_-_60790563.23-P1P2	GGCGTCAGCGAACTCCCTAG	2	Eif3a_-_60790582.23-P1P2|Eif3a_-_60790563.23-P1P2
Cd99l2	P1P2	Cd99l2_-_71492555.23-P1P2	GGGTGGCCAAGGAGAAAACG	1	Cd99l2_-_71492608.23-P1P2	GTGGCTGGGAGCAGGCGCAG	2	Cd99l2_-_71492555.23-P1P2|Cd99l2_-_71492608.23-P1P2
Eif3m	P1P2	Eif3m_+_105017052.23-P1P2	GGGTTGTGCGTAACCCTGTA	1	Eif3m_+_105016671.23-P1P2	GCCGCGGCCACAGGCGACGG	2	Eif3m_+_105017052.23-P1P2|Eif3m_+_105016671.23-P1P2
Rtbdn	P2	Rtbdn_-_84947050.23-P2	GAACCCTAGACAGAACGGGA	1	Rtbdn_+_84947060.23-P2	GAGTTACAGGCTGCCACCCA	2	Rtbdn_-_84947050.23-P2|Rtbdn_+_84947060.23-P2
Cnot4	P1P2	Cnot4_-_35133674.23-P1P2	GCAGCTTTCGGTGGGTTCCA	1	Cnot4_-_35133702.23-P1P2	GGGGCCACCATCTTACATTA	2	Cnot4_-_35133674.23-P1P2|Cnot4_-_35133702.23-P1P2
F5	P1P2	F5_-_164151843.23-P1P2	GGGTTAGACAGCCACCACAG	1	F5_+_164151882.23-P1P2	GGCGCGCTGATCTGTCTCCC	2	F5_-_164151843.23-P1P2|F5_+_164151882.23-P1P2
Baz1b	P1P2	Baz1b_+_135187330.23-P1P2	GACTCCTCTCCAGCGGGCAC	1	Baz1b_+_135187327.23-P1P2	GCCTCTCCAGCGGGCACGGG	2	Baz1b_+_135187330.23-P1P2|Baz1b_+_135187327.23-P1P2
Med14	P1P2	Med14_+_12761752.23-P1P2	GTGCGGTCACCGAGCCCGGG	1	Med14_+_12761769.23-P1P2	GGCCCGCGCCCGCCTCGGTG	2	Med14_+_12761752.23-P1P2|Med14_+_12761769.23-P1P2
Ranbp6	P1P2	Ranbp6_+_29812907.23-P1P2	GGGGTTGCCGGCGACCGTGT	1	Ranbp6_+_29812926.23-P1P2	GGGCGGCGGCCGGGTCTGCA	2	Ranbp6_+_29812907.23-P1P2|Ranbp6_+_29812926.23-P1P2
Jund	P1P2	Jund_-_70698968.23-P1P2	GCATCGGAGCCGGTCTGTAC	1	Jund_+_70698955.23-P1P2	GGTCCGCTGCCCGTACAGAC	2	Jund_-_70698968.23-P1P2|Jund_+_70698955.23-P1P2
Gm933	ENSMUST00000179384.2	Gm933_-_32810269.23-ENSMUST00000179384.2	GGGTTCTAGCCATCAGAAGG	1	Gm933_-_32810501.23-ENSMUST00000179384.2	GAGCTCCAATAGCTACTCAC	2	Gm933_-_32810269.23-ENSMUST00000179384.2|Gm933_-_32810501.23-ENSMUST00000179384.2
Npy	P1P2	Npy_+_49822771.23-P1P2	GGCGGGCAGTCGTCGCTGAG	1	Npy_-_49822750.23-P1P2	GTGGATCTCTTCTCTCACAG	2	Npy_+_49822771.23-P1P2|Npy_-_49822750.23-P1P2
Rps3a2	P1P2	Rps3a2_+_88123812.23-P1P2	GTCCCTTTTGGCTCTCCAGT	1	Rps3a2_+_88123824.23-P1P2	GAAATTTTGATGTTCCCTTT	2	Rps3a2_+_88123812.23-P1P2|Rps3a2_+_88123824.23-P1P2
G6pc3	P1P2	G6pc3_-_102189723.23-P1P2	GGAGGAAACAGTACCAGCTA	1	G6pc3_-_102189705.23-P1P2	GGGCCGAGGAAGAAAGCCGG	2	G6pc3_-_102189723.23-P1P2|G6pc3_-_102189705.23-P1P2
Mxra8	P1P2	Mxra8_+_155839855.23-P1P2	GCAGTTTCCACAGCAGGACG	1	Mxra8_+_155840090.23-P1P2	GCTGGAGCCACACAGAATGT	2	Mxra8_+_155839855.23-P1P2|Mxra8_+_155840090.23-P1P2
Slc14a1	P2	Slc14a1_-_78142098.23-P2	GGGGCTTCTGACTACCCCAC	1	Slc14a1_-_78142070.23-P2	GCCACTGGGCCCCTGCAGTG	2	Slc14a1_-_78142098.23-P2|Slc14a1_-_78142070.23-P2
Ccdc33	P1P2	Ccdc33_+_58102243.23-P1P2	GACCCCACTTCACCCTCCTG	1	Ccdc33_-_58102239.23-P1P2	GAGGTTAGGGAACGGATTCC	2	Ccdc33_+_58102243.23-P1P2|Ccdc33_-_58102239.23-P1P2
Epha3	P1P2	Epha3_-_63864073.23-P1P2	GTGGTGCACCGGGCAGTGAG	1	Epha3_-_63864111.23-P1P2	GGCATACCACTGATGTGAGG	2	Epha3_-_63864073.23-P1P2|Epha3_-_63864111.23-P1P2
Sprr2a3	ENSMUST00000090872.4	Sprr2a3_-_92288856.23-ENSMUST00000090872.4	GGTGACCACCCAACAAGTGA	1	Sprr2a3_+_92288842.23-ENSMUST00000090872.4	GTGGGAGGCCTTCACTTGTT	2	Sprr2a3_-_92288856.23-ENSMUST00000090872.4|Sprr2a3_+_92288842.23-ENSMUST00000090872.4
Negr1	P1P2	Negr1_+_156561879.23-P1P2	GCCGGAGCGTGGCTAATCCC	1	Negr1_+_156561876.23-P1P2	GGAGCGTGGCTAATCCCTGG	2	Negr1_+_156561879.23-P1P2|Negr1_+_156561876.23-P1P2
Shisa3	P1P2	Shisa3_-_67607947.23-P1P2	GCCGCCTGCGTGACAGTCAG	1	Shisa3_+_67607963.23-P1P2	GTGCAGGTCTCGGGGACCAA	2	Shisa3_-_67607947.23-P1P2|Shisa3_+_67607963.23-P1P2
Ush1g	P1P2	Ush1g_+_115321989.23-P1P2	GGCTCCGCATCCACCATCTG	1	Ush1g_-_115322007.23-P1P2	GCTGCCGCAGATGGTGGATG	2	Ush1g_+_115321989.23-P1P2|Ush1g_-_115322007.23-P1P2
Gabrp	P1P2	Gabrp_+_33578926.23-P1P2	GCGCCACTCCATCGGAGACT	1	Gabrp_+_33578934.23-P1P2	GAGAGAGCGCGCCACTCCAT	2	Gabrp_+_33578926.23-P1P2|Gabrp_+_33578934.23-P1P2
Igsf3	P1P2	Igsf3_-_101377161.23-P1P2	GGGCGTGCGGGACACAGGAC	1	Igsf3_-_101377138.23-P1P2	GGGAGGAAGCCGTGCGTCTT	2	Igsf3_-_101377161.23-P1P2|Igsf3_-_101377138.23-P1P2
0610009B22Rik	P1P2	0610009B22Rik_-_51688574.23-P1P2	GCGACTTCCCTCTAGTTCAG	1	0610009B22Rik_-_51688592.23-P1P2	GGGGGCAGACAAGCTCAAAG	2	0610009B22Rik_-_51688574.23-P1P2|0610009B22Rik_-_51688592.23-P1P2
Lpin1	P1P2	Lpin1_+_16589755.23-P1P2	GGCCCGCTGTTTGCATACAA	1	Lpin1_-_16589751.23-P1P2	GGAGCAGGCGCGCACGCGTG	2	Lpin1_+_16589755.23-P1P2|Lpin1_-_16589751.23-P1P2
Csmd3	P1P2	Csmd3_+_48791895.23-P1P2	GGCTCGCGAATAATATGAAA	1	Csmd3_+_48791937.23-P1P2	GGCAACAACTCTACTGCGCT	2	Csmd3_+_48791895.23-P1P2|Csmd3_+_48791937.23-P1P2
Cphx1	ENSMUST00000184016.1	Cphx1_-_25942578.23-ENSMUST00000184016.1	GGAGCAAGGTCTGAGATTGG	1	Cphx1_-_25942575.23-ENSMUST00000184016.1	GACCGAGCAAGGTCTGAGAT	2	Cphx1_-_25942578.23-ENSMUST00000184016.1|Cphx1_-_25942575.23-ENSMUST00000184016.1
Fam229b	P1P2	Fam229b_-_39133863.23-P1P2	GATGCTCAAGGATGTTGACA	1	Fam229b_-_39133851.23-P1P2	GCCGGAGCTGCAGATGCTCA	2	Fam229b_-_39133863.23-P1P2|Fam229b_-_39133851.23-P1P2
2810408A11Rik	P1P2	2810408A11Rik_+_69900882.23-P1P2	GCCTCAGCGCCAGGGAGAAG	1	2810408A11Rik_+_69900783.23-P1P2	GTATGTGCAGCTAGAAGGGT	2	2810408A11Rik_+_69900882.23-P1P2|2810408A11Rik_+_69900783.23-P1P2
Pex11a	P1P2	Pex11a_+_79742998.23-P1P2	GCGTCCCAGGGGACCCACGA	1	Pex11a_-_79743016.23-P1P2	GGCTCCCTCGTGGGTCCCCT	2	Pex11a_+_79742998.23-P1P2|Pex11a_-_79743016.23-P1P2
Ccr9	P2	Ccr9_+_123678376.23-P2	GGGTGCGGTGCCGTCTACAG	1	Ccr9_+_123678431.23-P2	GGGCTCCAGCAGGTGCAGGG	2	Ccr9_+_123678376.23-P2|Ccr9_+_123678431.23-P2
Edn2	P1P2	Edn2_+_120161486.23-P1P2	GGCAGCAGCGGCAGAGTGCT	1	Edn2_+_120161516.23-P1P2	GAGAGCGATGGAACACCAGG	2	Edn2_+_120161486.23-P1P2|Edn2_+_120161516.23-P1P2
Klri2	P1P2	Klri2_+_129740450.23-P1P2	GGCAAGTTACCAAGACTGAG	1	Klri2_+_129740215.23-P1P2	GCCAGGACAGGATTCGATGT	2	Klri2_+_129740450.23-P1P2|Klri2_+_129740215.23-P1P2
Gpr160	P1P2	Gpr160_-_30856002.23-P1P2	GGCCGCTCAGGCAGTTACGG	1	Gpr160_-_30856036.23-P1P2	GGGCTACTCACGCTACGCCA	2	Gpr160_-_30856002.23-P1P2|Gpr160_-_30856036.23-P1P2
Ldlrap1	P1P2	Ldlrap1_+_134767921.23-P1P2	Ggcggtagcggcgtcagtgg	1	Ldlrap1_+_134767903.23-P1P2	Ggcggcggcgacaaccggag	2	Ldlrap1_+_134767921.23-P1P2|Ldlrap1_+_134767903.23-P1P2
Olfr1100	ENSMUST00000094913.3	Olfr1100_-_86978590.23-ENSMUST00000094913.3	GAGTTGAGTAACTGAGATCG	1	Olfr1100_-_86978409.23-ENSMUST00000094913.3	GTGATAACTGGGTATTGTAA	2	Olfr1100_-_86978590.23-ENSMUST00000094913.3|Olfr1100_-_86978409.23-ENSMUST00000094913.3
Tigd4	P1P2	Tigd4_+_84593787.23-P1P2	GTGAGTCCCGATATCCACAG	1	Tigd4_-_84593780.23-P1P2	GGCACAAGCCGCATCTGAGA	2	Tigd4_+_84593787.23-P1P2|Tigd4_-_84593780.23-P1P2
4930503E14Rik	ENSMUST00000100688.2	4930503E14Rik_-_44171114.23-ENSMUST00000100688.2	GAGTTCTTAATATCTACTGA	1	4930503E14Rik_+_44171359.23-ENSMUST00000100688.2	GTGTGACATCACCTGGGTTG	2	4930503E14Rik_-_44171114.23-ENSMUST00000100688.2|4930503E14Rik_+_44171359.23-ENSMUST00000100688.2
Ccpg1	P1P2	Ccpg1_-_72985654.23-P1P2	GGACAGCTGGCGCGGTCGGG	1	Ccpg1_-_72985651.23-P1P2	GGGTGACAGCTGGCGCGGTC	2	Ccpg1_-_72985654.23-P1P2|Ccpg1_-_72985651.23-P1P2
Lrrc63	P1P2	Lrrc63_+_75130875.23-P1P2	GGGCTTGGGGATGCTGCTAA	1	Lrrc63_+_75130813.23-P1P2	GGACCTCGCTAGACAGTCAC	2	Lrrc63_+_75130875.23-P1P2|Lrrc63_+_75130813.23-P1P2
Plaa	P1P2	Plaa_+_94602998.23-P1P2	GGAGCGGCGCCTCCAGATAC	1	Plaa_-_94602797.23-P1P2	GAGGAAGAGGGAGAGATTCA	2	Plaa_+_94602998.23-P1P2|Plaa_-_94602797.23-P1P2
Cntn4	P1P2	Cntn4_-_105677752.23-P1P2	GAGCTGCCACCAGCACAGGG	1	Cntn4_+_105677900.23-P1P2	GGACAGTGCGCTCCAGAGTC	2	Cntn4_-_105677752.23-P1P2|Cntn4_+_105677900.23-P1P2
Cul1	P1P2	Cul1_-_47454423.23-P1P2	GGAGGGACGCGGCCAGACCT	1	Cul1_-_47454647.23-P1P2	GGCCGGGCCGGAGAAGTCGT	2	Cul1_-_47454423.23-P1P2|Cul1_-_47454647.23-P1P2
Lrp6	P1P2	Lrp6_+_134566957.23-P1P2	GGCGCCGCTGCGAGAGGAAG	1	Lrp6_+_134566947.23-P1P2	GGAGAGGAAGAGGCTGAATG	2	Lrp6_+_134566957.23-P1P2|Lrp6_+_134566947.23-P1P2
Sqle	P1P2	Sqle_+_59315127.23-P1P2	GGGGTCCCCAGCATCCCTCG	1	Sqle_-_59315119.23-P1P2	GGGGCGCGCAGCGGTTACTC	2	Sqle_+_59315127.23-P1P2|Sqle_-_59315119.23-P1P2
Slc1a7	P1P2	Slc1a7_+_107968472.23-P1P2	GTACAGGTGAACAGAGTCCT	1	Slc1a7_-_107968469.23-P1P2	GTGGCTGCAAGGCTGCTGAT	2	Slc1a7_+_107968472.23-P1P2|Slc1a7_-_107968469.23-P1P2
Dnajc14	P1P2	Dnajc14_+_128805629.23-P1P2	GCAGCTGCGCCTGAGGCCAG	1	Dnajc14_+_128805670.23-P1P2	GGCGACGTACCGAGCAGCAG	2	Dnajc14_+_128805629.23-P1P2|Dnajc14_+_128805670.23-P1P2
Sval2	P1P2	Sval2_+_41860365.23-P1P2	GAGAGATGCATAAGAGCTCC	1	Sval2_+_41860567.23-P1P2	GACATTTAGTCACAGAATAT	2	Sval2_+_41860365.23-P1P2|Sval2_+_41860567.23-P1P2
Gnai2	P1P2	Gnai2_-_107635323.23-P1P2	GCCCTCTGCGGGAAGCTCTC	1	Gnai2_-_107635311.23-P1P2	GTCCCACCGCCGGCCCTCTG	2	Gnai2_-_107635323.23-P1P2|Gnai2_-_107635311.23-P1P2
Hmg20a	P1P2	Hmg20a_-_56418858.23-P1P2	GGAGTGAAGGCGATTGCGAG	1	Hmg20a_-_56418885.23-P1P2	GGGAATTGTCCTCTGTGCAA	2	Hmg20a_-_56418858.23-P1P2|Hmg20a_-_56418885.23-P1P2
Mdfic	P1P2	Mdfic_-_15720729.23-P1P2	GTGTAGGAGTGGCAGCGCGA	1	Mdfic_-_15720718.23-P1P2	GTGTTTGAAGAGTGTAGGAG	2	Mdfic_-_15720729.23-P1P2|Mdfic_-_15720718.23-P1P2
Gm10334	P1P2	Gm10334_+_41446003.23-P1P2	GGTGAGTTTCGTGCTTTCTA	1	Gm10334_-_41445944.23-P1P2	GTGAACATCAGAGAGAGCTA	2	Gm10334_+_41446003.23-P1P2|Gm10334_-_41445944.23-P1P2
Thoc5	P1P2	Thoc5_-_4895388.23-P1P2	GGGAGCATTCTGGTGAGCGA	1	Thoc5_-_4895395.23-P1P2	GTCTGGTGAGCGAGGGTAGA	2	Thoc5_-_4895388.23-P1P2|Thoc5_-_4895395.23-P1P2
Ncald	P2	Ncald_+_37792001.23-P2	GACGCTGGGAGCGGCCCTGG	1	Ncald_-_37791984.23-P2	GCCCGCTCCCTGCTAGAGGA	2	Ncald_+_37792001.23-P2|Ncald_-_37791984.23-P2
Glt6d1	P1P2	Glt6d1_-_25815798.23-P1P2	GCTTGGATCAGGGTGGTATT	1	Glt6d1_-_25815820.23-P1P2	GAGACAGGCAAAAATGTCCG	2	Glt6d1_-_25815798.23-P1P2|Glt6d1_-_25815820.23-P1P2
2310007B03Rik	P1P2	2310007B03Rik_+_93160891.23-P1P2	GCACCGGGCAGGGCACCCAC	1	2310007B03Rik_+_93160877.23-P1P2	GCCCACTGGCAGGTATGGAG	2	2310007B03Rik_+_93160891.23-P1P2|2310007B03Rik_+_93160877.23-P1P2
Aifm3	P1P2	Aifm3_+_17489708.23-P1P2	GCCGCGAGCGAGCTGTCCCG	1	Aifm3_-_17489678.23-P1P2	GcgcccgcggccACCAAGCC	2	Aifm3_+_17489708.23-P1P2|Aifm3_-_17489678.23-P1P2
Tefm	P1P2	Tefm_-_80142092.23-P1P2	GCCTACCTCCGGCCTTGATG	1	Tefm_+_80142132.23-P1P2	GTGAGGAGGAACACAGGCGT	2	Tefm_-_80142092.23-P1P2|Tefm_+_80142132.23-P1P2
Pik3cg	P1P2	Pik3cg_-_32208604.23-P1P2	GACGAATCTAGACCTACCCG	1	Pik3cg_-_32208542.23-P1P2	GGGCAGCCCTGGAGGTGATG	2	Pik3cg_-_32208604.23-P1P2|Pik3cg_-_32208542.23-P1P2
Paox	P1	Paox_+_140125723.23-P1	GCGCGGGCCAGGGAACGCCA	1	Paox_-_140125728.23-P1	GGAGGACCCTGAGCTAGCCA	2	Paox_+_140125723.23-P1|Paox_-_140125728.23-P1
Rnf165	P1P2	Rnf165_-_77565326.23-P1P2	GCGCAGCTGCCGCCACACAA	1	Rnf165_+_77565336.23-P1P2	GCGCTGCGCTCCGCTCCCAT	2	Rnf165_-_77565326.23-P1P2|Rnf165_+_77565336.23-P1P2
Tmem191c	P1P2	Tmem191c_-_17276365.23-P1P2	GTGCAGAAGGACAACCGAGA	1	Tmem191c_-_17276375.23-P1P2	GCAACCGAGATGGCCGCCTG	2	Tmem191c_-_17276365.23-P1P2|Tmem191c_-_17276375.23-P1P2
Grin3a	P1P2	Grin3a_+_49845714.23-P1P2	GCGCTCCTCCAAGGAAGCCG	1	Grin3a_-_49845731.23-P1P2	GACTTCCGCGGCTTCCTTGG	2	Grin3a_+_49845714.23-P1P2|Grin3a_-_49845731.23-P1P2
Pom121l2	P1P2	Pom121l2_-_21981527.23-P1P2	GCTCCGCCGAGGTTGAAACG	1	Pom121l2_+_21981551.23-P1P2	GGGTAGCTGCCCATGCTGAG	2	Pom121l2_-_21981527.23-P1P2|Pom121l2_+_21981551.23-P1P2
Fcer2a	P1P2	Fcer2a_-_3694137.23-P1P2	GTATGTGGAGCACTTGGATA	1	Fcer2a_-_3694146.23-P1P2	GCACTTGGATAAGGTAGCTC	2	Fcer2a_-_3694137.23-P1P2|Fcer2a_-_3694146.23-P1P2
Cenpe	P1P2	Cenpe_-_135212661.23-P1P2	GTAGTCTGCAGCGGACAGGA	1	Cenpe_-_135212670.23-P1P2	GGCGGACAGGATGGCCGAGG	2	Cenpe_-_135212661.23-P1P2|Cenpe_-_135212670.23-P1P2
Zfp366	P1P2	Zfp366_+_99184743.23-P1P2	GCCGATTGCAGGGAACTTAA	1	Zfp366_+_99184733.23-P1P2	GGGAACTTAAAGGACTCGCA	2	Zfp366_+_99184743.23-P1P2|Zfp366_+_99184733.23-P1P2
Thsd7b	P1P2	Thsd7b_-_129273513.23-P1P2	GTGCCAGACGCTGGAATGGG	1	Thsd7b_-_129273504.23-P1P2	GCAGCCGGGTTGCCAGACGC	2	Thsd7b_-_129273513.23-P1P2|Thsd7b_-_129273504.23-P1P2
Fbxo48	P1P2	Fbxo48_+_16951449.23-P1P2	GCTGGTCCCTGTGCAGGGAA	1	Fbxo48_-_16951440.23-P1P2	GCCGCGCCTTTAGGTAGGAG	2	Fbxo48_+_16951449.23-P1P2|Fbxo48_-_16951440.23-P1P2
Slmap	P1P2	Slmap_+_26534833.23-P1P2	GCTGGCAAGGTAAGCTGAgg	1	Slmap_+_26534830.23-P1P2	GGCAAGGTAAGCTGAggcgg	2	Slmap_+_26534833.23-P1P2|Slmap_+_26534830.23-P1P2
Eya2	P1	Eya2_-_165595045.23-P1	GTCCTCCGGGAGCGCAGCGG	1	Eya2_-_165595071.23-P1	GGAGAGCAGCGCGCACTGCA	2	Eya2_-_165595045.23-P1|Eya2_-_165595071.23-P1
Jkamp	P1P2	Jkamp_-_72086163.23-P1P2	GCTGATCCCCGGCTTCTCAG	1	Jkamp_-_72086152.23-P1P2	GGTTCGGACCCGCTGATCCC	2	Jkamp_-_72086163.23-P1P2|Jkamp_-_72086152.23-P1P2
Lzic	P1P2	Lzic_+_149485297.23-P1P2	GCGCCCGCTAGCGGATCCCA	1	Lzic_+_149485283.23-P1P2	GTCCCAGGGTTTGGAACCAG	2	Lzic_+_149485297.23-P1P2|Lzic_+_149485283.23-P1P2
Pdcd4	P1	Pdcd4_-_53903418.23-P1	GAGGCGCTCCGAGGCAGCGG	1	Pdcd4_-_53903437.23-P1	GCGGCGGAGGCTGAGGAACG	2	Pdcd4_-_53903418.23-P1|Pdcd4_-_53903437.23-P1
Ptgir	P1P2	Ptgir_-_16906557.23-P1P2	GGAGACTGAGGGACTTCAGA	1	Ptgir_-_16906534.23-P1P2	GCACAGACTCGCACACAGAC	2	Ptgir_-_16906557.23-P1P2|Ptgir_-_16906534.23-P1P2
Grina	P1P2	Grina_+_76246809.23-P1P2	GGTCCGCACCTGCACCCGCT	1	Grina_+_76246792.23-P1P2	GCTGGGCGGCCGGATTGCTT	2	Grina_+_76246809.23-P1P2|Grina_+_76246792.23-P1P2
Gm5416	P1P2	Gm5416_-_36210354.23-P1P2	GCCCGAGTCTCAGTGCTTAC	1	Gm5416_+_36210784.23-P1P2	GACACCAGCTTCAACTAGAG	2	Gm5416_-_36210354.23-P1P2|Gm5416_+_36210784.23-P1P2
Rbak	P1P2	Rbak_-_143180713.23-P1P2	GGCAAAGGCTGCGGGAGGGA	1	Rbak_+_143180339.23-P1P2	GCAGGCACTGAAGAACTCAA	2	Rbak_-_143180713.23-P1P2|Rbak_+_143180339.23-P1P2
B930041F14Rik	P1P2	B930041F14Rik_+_155694555.23-P1P2	GGGCGGCGTCGGGTCCACAG	1	B930041F14Rik_-_155694369.23-P1P2	GGCCTGGGCGTGAAGCGGGT	2	B930041F14Rik_+_155694555.23-P1P2|B930041F14Rik_-_155694369.23-P1P2
Olfr1220	ENSMUST00000099796.2	Olfr1220_-_89097728.23-ENSMUST00000099796.2	GGAAGTGCAAGTATCCAATA	1	Olfr1220_+_89097809.23-ENSMUST00000099796.2	GTATACCTAGCAACAATCGG	2	Olfr1220_-_89097728.23-ENSMUST00000099796.2|Olfr1220_+_89097809.23-ENSMUST00000099796.2
Prss28	P1P2	Prss28_+_25308728.23-P1P2	GGAGAGCCCCCCAAGTAGGT	1	Prss28_+_25308708.23-P1P2	GGGTGCATCCAGATTGCCTA	2	Prss28_+_25308728.23-P1P2|Prss28_+_25308708.23-P1P2
Mst1	P1P2	Mst1_+_108080540.23-P1P2	GGGCAGACTGGGATCAGGGT	1	Mst1_-_108080486.23-P1P2	GCCAGCTTAGGAGAATGGGG	2	Mst1_+_108080540.23-P1P2|Mst1_-_108080486.23-P1P2
Tbx2	P1P2	Tbx2_-_85832791.23-P1P2	GAGCGCAGGGGATCCGAACA	1	Tbx2_+_85833208.23-P1P2	GCTAGCGCCGGGAAGAAGGA	2	Tbx2_-_85832791.23-P1P2|Tbx2_+_85833208.23-P1P2
Stpg2	P1P2	Stpg2_-_139205941.23-P1P2	GGGCTCGACTGTGCCAACCG	1	Stpg2_-_139205963.23-P1P2	GCAGCACCGAGGAGCACGTG	2	Stpg2_-_139205941.23-P1P2|Stpg2_-_139205963.23-P1P2
Rsc1a1	P1P2	Rsc1a1_-_141685370.23-P1P2	GCTGCTGAGGAAGCAAGGTC	1	Rsc1a1_+_141685531.23-P1P2	GCAGGGCAGAGTCCTGAGGT	2	Rsc1a1_-_141685370.23-P1P2|Rsc1a1_+_141685531.23-P1P2
Tapbpl	P1P2	Tapbpl_+_125231687.23-P1P2	GGACCACAGGTGCTAAGTGA	1	Tapbpl_-_125231675.23-P1P2	GTGATCTCTGGCTGAAGAGG	2	Tapbpl_+_125231687.23-P1P2|Tapbpl_-_125231675.23-P1P2
Pycard	P1P2	Pycard_-_127993741.23-P1P2	GCTGCCAGCCCGCCAAGACC	1	Pycard_-_127993675.23-P1P2	GGCTCTGGGGTGGGCAGCCG	2	Pycard_-_127993741.23-P1P2|Pycard_-_127993675.23-P1P2
Lepr	P1P2	Lepr_-_101717958.23-P1P2	GGGTATGTTGAGGCCATCTA	1	Lepr_-_101717973.23-P1P2	GTCTAAGGCACTGGGTGTCG	2	Lepr_-_101717958.23-P1P2|Lepr_-_101717973.23-P1P2
Pnp	P1P2	Pnp_-_50944551.23-P1P2	GTGTCGCCGTGGAGCGGAAA	1	Pnp_-_50944545.23-P1P2	GAGACAGTGTCGCCGTGGAG	2	Pnp_-_50944551.23-P1P2|Pnp_-_50944545.23-P1P2
Cfhr2	P1P2	Cfhr2_-_139858702.23-P1P2	GACAATGCTGTGTATCACAT	1	Cfhr2_+_139858541.23-P1P2	GAAGGGGAAGGTAAGTGGAA	2	Cfhr2_-_139858702.23-P1P2|Cfhr2_+_139858541.23-P1P2
Nr4a2	P2	Nr4a2_+_57124118.23-P2	GGAGCCCGGCCGGGCTGACG	1	Nr4a2_-_57124117.23-P2	GccgcggccAAGCGCGTCAG	2	Nr4a2_+_57124118.23-P2|Nr4a2_-_57124117.23-P2
Dcun1d5	P1P2	Dcun1d5_+_7184542.23-P1P2	GAGTAGCAGCGAAGAGCAGG	1	Dcun1d5_+_7184571.23-P1P2	GGCAGCGAACGCCGACAGCG	2	Dcun1d5_+_7184542.23-P1P2|Dcun1d5_+_7184571.23-P1P2
Dusp13	P2	Dusp13_-_21742836.23-P2	GTGCCAAGGGCAGACTGCAG	1	Dusp13_+_21742855.23-P2	GACAGGTCTGTCTCCCTCCA	2	Dusp13_-_21742836.23-P2|Dusp13_+_21742855.23-P2
Prkacb	P1P2	Prkacb_+_146781389.23-P1P2	GTAGCTCTTAGCGTCTTGGT	1	Prkacb_-_146781186.23-P1P2	GAGTGTGCTCAGAGGCCCGA	2	Prkacb_+_146781389.23-P1P2|Prkacb_-_146781186.23-P1P2
Top3b	P1P2	Top3b_-_16870820.23-P1P2	GGCCGGAGCGAGAGGCGCAG	1	Top3b_-_16870828.23-P1P2	GGAGAGGCGCAGCGGCACGG	2	Top3b_-_16870820.23-P1P2|Top3b_-_16870828.23-P1P2
Zmym4	P1P2	Zmym4_-_126968077.23-P1P2	GTGGGCGCAAGGGCCTGCCG	1	Zmym4_-_126968059.23-P1P2	GGTCCCACGGGCGGGCGCGT	2	Zmym4_-_126968077.23-P1P2|Zmym4_-_126968059.23-P1P2
Fam118b	P1P2	Fam118b_+_35267742.23-P1P2	GCCGGTAGCTGCAGCTGGAG	1	Fam118b_+_35267709.23-P1P2	GGCAGACGCGGTGAGTGTGT	2	Fam118b_+_35267742.23-P1P2|Fam118b_+_35267709.23-P1P2
Supt16	P1P2	Supt16_-_52197175.23-P1P2	GCTGGACGCCGCTTCCCGTC	1	Supt16_-_52197194.23-P1P2	GGGGCTCCGAGAATCACGCG	2	Supt16_-_52197175.23-P1P2|Supt16_-_52197194.23-P1P2
Bcdin3d	P1P2	Bcdin3d_+_99474660.23-P1P2	GACGGGACATTGTCAAGAGG	1	Bcdin3d_+_99474625.23-P1P2	GGTGGAGGAAGAGCATCCGG	2	Bcdin3d_+_99474660.23-P1P2|Bcdin3d_+_99474625.23-P1P2
Olfr1425	ENSMUST00000087828.1	Olfr1425_+_12074611.23-ENSMUST00000087828.1	GGAGATGGAAAACTATACCA	1	Olfr1425_-_12074546.23-ENSMUST00000087828.1	GTGTCACATACACCAGGAGA	2	Olfr1425_+_12074611.23-ENSMUST00000087828.1|Olfr1425_-_12074546.23-ENSMUST00000087828.1
Kif15	P1P2	Kif15_-_122951099.23-P1P2	GCTTGAAGGGAGGATTCTGG	1	Kif15_-_122951127.23-P1P2	GCGTAAGCGAATCTCGGACG	2	Kif15_-_122951099.23-P1P2|Kif15_-_122951127.23-P1P2
Wdr46	P1P2	Wdr46_-_33940702.23-P1P2	GCCGCCGAGCTACTACTCAA	1	Wdr46_+_33940876.23-P1P2	GTAGCGCCGCGGTTTCTAAG	2	Wdr46_-_33940702.23-P1P2|Wdr46_+_33940876.23-P1P2
Araf	P1P2	Araf_-_20848639.23-P1P2	GGGTGAGGGCAGGCCCGGTA	1	Araf_-_20848601.23-P1P2	GCCCAAGATGGAGGCGGTGG	2	Araf_-_20848639.23-P1P2|Araf_-_20848601.23-P1P2
Wee2	P1P2	Wee2_-_40442973.23-P1P2	GGGCTGGCCCAGAGAAGAAG	1	Wee2_-_40443017.23-P1P2	GGGAGAACTGACCTACTCGG	2	Wee2_-_40442973.23-P1P2|Wee2_-_40443017.23-P1P2
Oxsm	P1	Oxsm_+_16243299.23-P1	GACTCGGTGGGCGCCCGCAA	1	Oxsm_+_16243311.23-P1	GGTGCGCATGCGCACTCGGT	2	Oxsm_+_16243299.23-P1|Oxsm_+_16243311.23-P1
Osgep	P1P2	Osgep_+_50924782.23-P1P2	GCTCACGACCGGGAGCCGTG	1	Osgep_+_50924792.23-P1P2	GGTCACTCGGCCTCACGACC	2	Osgep_+_50924782.23-P1P2|Osgep_+_50924792.23-P1P2
Cryba1	P1P2	Cryba1_+_77725249.23-P1P2	GAGACTGTGCAGCGGGAGTT	1	Cryba1_-_77725217.23-P1P2	GGCATCTGTCTATCGAGGAA	2	Cryba1_+_77725249.23-P1P2|Cryba1_-_77725217.23-P1P2
Olfr2	ENSMUST00000094109.2	Olfr2_+_107002565.23-ENSMUST00000094109.2	GAACTTGGTCTTGATGCTAA	1	Olfr2_-_107002491.23-ENSMUST00000094109.2	GCAGGACATGAAGTAGGTCC	2	Olfr2_+_107002565.23-ENSMUST00000094109.2|Olfr2_-_107002491.23-ENSMUST00000094109.2
Slc2a9	P2	Slc2a9_+_38491909.23-P2	GTAGACTAGAGTGGGCGAGG	1	Slc2a9_+_38491878.23-P2	GCAGGTGAGTTACTGACTTT	2	Slc2a9_+_38491909.23-P2|Slc2a9_+_38491878.23-P2
Isca1	P1P2	Isca1_+_59769510.23-P1P2	GCCGCGCGCGGAGCTCGATG	1	Isca1_+_59769785.23-P1P2	GGCGCCTGCGCAGGAGCTTG	2	Isca1_+_59769510.23-P1P2|Isca1_+_59769785.23-P1P2
Echdc1	P1P2	Echdc1_-_29313581.23-P1P2	GCAGGCGCCGCCGCGCAGGT	1	Echdc1_+_29313566.23-P1P2	GCACGAGCCCACCTGCGCGG	2	Echdc1_-_29313581.23-P1P2|Echdc1_+_29313566.23-P1P2
Tmem51	P1P2	Tmem51_-_142084208.23-P1P2	GCGCAGCCCGGGGACCTCTG	1	Tmem51_+_142084193.23-P1P2	GTGATCGCCACAGAGGTCCC	2	Tmem51_-_142084208.23-P1P2|Tmem51_+_142084193.23-P1P2
Ubr3	P1P2	Ubr3_-_69897303.23-P1P2	GTGAGCTCTCATCATggcgg	1	Ubr3_+_69897562.23-P1P2	GAGGCACTTACACCACTCCA	2	Ubr3_-_69897303.23-P1P2|Ubr3_+_69897562.23-P1P2
Fam122a	P1P2	Fam122a_+_24477433.23-P1P2	GAGATTCTCGAAggcggcgg	1	Fam122a_+_24477439.23-P1P2	GGCTGACAGATTCTCGAAgg	2	Fam122a_+_24477433.23-P1P2|Fam122a_+_24477439.23-P1P2
Ppp2r2a	P1P2	Ppp2r2a_-_67072399.23-P1P2	Ggcggcggctaggacagcga	1	Ppp2r2a_-_67072402.23-P1P2	Ggcggctaggacagcgacgg	2	Ppp2r2a_-_67072399.23-P1P2|Ppp2r2a_-_67072402.23-P1P2
Fzd9	P1P2	Fzd9_+_135251193.23-P1P2	GGGAGTggcggcggcatcgg	1	Fzd9_+_135251205.23-P1P2	GCCGGCTCTGGCTGGAGTgg	2	Fzd9_+_135251193.23-P1P2|Fzd9_+_135251205.23-P1P2
Olfr1239	ENSMUST00000099780.1	Olfr1239_+_89418349.23-ENSMUST00000099780.1	GGCCTGACTCAGAGTCCTGA	1	Olfr1239_-_89418369.23-ENSMUST00000099780.1	GGCCTTCAGGACTCTGAGTC	2	Olfr1239_+_89418349.23-ENSMUST00000099780.1|Olfr1239_-_89418369.23-ENSMUST00000099780.1
Il9r	P1P2	Il9r_-_32200230.23-P1P2	GCAGGGCCATGGAGAGTCTC	1	Il9r_+_32200214.23-P1P2	GGGCTGCCTGAGACTCTCCA	2	Il9r_-_32200230.23-P1P2|Il9r_+_32200214.23-P1P2
Cask	P1P2	Cask_-_13846516.23-P1P2	GGCCGCGGCAGCACCATGGA	1	Cask_-_13846542.23-P1P2	GTCGTCGCGAAGGGAGGTGG	2	Cask_-_13846516.23-P1P2|Cask_-_13846542.23-P1P2
Cdh10	P1P2	Cdh10_+_18818726.23-P1P2	GGAGCTGCAGCACTCGCCAT	1	Cdh10_+_18818722.23-P1P2	GTGCAGCACTCGCCATGGGA	2	Cdh10_+_18818726.23-P1P2|Cdh10_+_18818722.23-P1P2
Shq1	P1P2	Shq1_+_100671132.23-P1P2	GGTCCGGAAGCGCTGTGGTA	1	Shq1_-_100671097.23-P1P2	GAAGCCAACACAGCCCCGCT	2	Shq1_+_100671132.23-P1P2|Shq1_-_100671097.23-P1P2
Olfr919	ENSMUST00000071425.1	Olfr919_-_38698143.23-ENSMUST00000071425.1	GATCTTCGGGGTAATAACAG	1	Olfr919_+_38698117.23-ENSMUST00000071425.1	GGTTATTACCCCGAAGATGT	2	Olfr919_-_38698143.23-ENSMUST00000071425.1|Olfr919_+_38698117.23-ENSMUST00000071425.1
Ctbs	P1P2	Ctbs_+_146450543.23-P1P2	GCCGAGAGCCGTGCCAACAG	1	Ctbs_+_146450515.23-P1P2	GCAGCAGAGTGAATTCCGGG	2	Ctbs_+_146450543.23-P1P2|Ctbs_+_146450515.23-P1P2
Spinkl	P1P2	Spinkl_+_44174974.23-P1P2	GGGTGGGTAGAGTCACTCTG	1	Spinkl_-_44174952.23-P1P2	GGGACATGGGAAAATCCTTA	2	Spinkl_+_44174974.23-P1P2|Spinkl_-_44174952.23-P1P2
Ufsp1	P1P2	Ufsp1_+_137294729.23-P1P2	GGACTAGCTACGGGCAGTGT	1	Ufsp1_+_137294716.23-P1P2	GCAGTGTGGGCACGTAGAAC	2	Ufsp1_+_137294729.23-P1P2|Ufsp1_+_137294716.23-P1P2
Eaf2	ENSMUST00000114829.2	Eaf2_-_36828242.23-ENSMUST00000114829.2	GCTGGCTGCGAGCTTGAGTT	1	Eaf2_+_36828285.23-ENSMUST00000114829.2	GAGACTCGGGGCGCTCCAAG	2	Eaf2_-_36828242.23-ENSMUST00000114829.2|Eaf2_+_36828285.23-ENSMUST00000114829.2
Celf1	P2	Celf1_-_90965126.23-P2	GCCTGCTCAGGATTCAGCCA	1	Celf1_+_90965089.23-P2	GAGCAGGTCTGAAGCAATGT	2	Celf1_-_90965126.23-P2|Celf1_+_90965089.23-P2
Olfr787	ENSMUST00000077836.2	Olfr787_+_129462712.23-ENSMUST00000077836.2	GTGGATCGTCTGATATGCCC	1	Olfr787_+_129462685.23-ENSMUST00000077836.2	GAAACTCAGTAATCACAGAA	2	Olfr787_+_129462712.23-ENSMUST00000077836.2|Olfr787_+_129462685.23-ENSMUST00000077836.2
Scml4	P1P2	Scml4_-_42860737.23-P1P2	GGGCAGGCGTAGCACACGGG	1	Scml4_-_42860734.23-P1P2	GTGAGGCAGGCGTAGCACAC	2	Scml4_-_42860737.23-P1P2|Scml4_-_42860734.23-P1P2
Olfr1256	ENSMUST00000111520.1	Olfr1256_-_89841150.23-ENSMUST00000111520.1	GGAGGGCTGCACGTTCTGTC	1	Olfr1256_+_89841104.23-ENSMUST00000111520.1	GGTAACTGACACAATTGCTA	2	Olfr1256_-_89841150.23-ENSMUST00000111520.1|Olfr1256_+_89841104.23-ENSMUST00000111520.1
P2ry14	P1P2	P2ry14_+_59130556.23-P1P2	GACGTGAAGGAGTTCATGTA	1	P2ry14_-_59130542.23-P1P2	GCAGGCATCAGTGTGTCTGG	2	P2ry14_+_59130556.23-P1P2|P2ry14_-_59130542.23-P1P2
Foxn4	P1P2	Foxn4_-_114273742.23-P1P2	GGGTGGCGCTGCGGTAGGGG	1	Foxn4_+_114273746.23-P1P2	GCAGCGAGGGGCGAGCGAAA	2	Foxn4_-_114273742.23-P1P2|Foxn4_+_114273746.23-P1P2
C2cd4c	P1P2	C2cd4c_+_79614016.23-P1P2	GGGCGCGCGGCCGCAATCGG	1	C2cd4c_-_79613960.23-P1P2	GGGCGCAGCTGCGAGCGAGG	2	C2cd4c_+_79614016.23-P1P2|C2cd4c_-_79613960.23-P1P2
Axdnd1	ENSMUST00000178036.1	Axdnd1_-_156421081.23-ENSMUST00000178036.1	GGTCATGGGTAGTAGCAATA	1	Axdnd1_-_156421121.23-ENSMUST00000178036.1	GTGTTGTCTCGGAATGGGAT	2	Axdnd1_-_156421081.23-ENSMUST00000178036.1|Axdnd1_-_156421121.23-ENSMUST00000178036.1
Tmprss11a	P1P2	Tmprss11a_+_86469071.23-P1P2	GGGGATGTCATAGAGCTGAT	1	Tmprss11a_-_86469037.23-P1P2	GACATCACGAATGGGAGGAA	2	Tmprss11a_+_86469071.23-P1P2|Tmprss11a_-_86469037.23-P1P2
Klk1	P1P2	Klk1_+_44225740.23-P1P2	GGAGAAGCTCAGAAATGATC	1	Klk1_+_44225794.23-P1P2	GAGCGACATCTGAGGTCCTA	2	Klk1_+_44225740.23-P1P2|Klk1_+_44225794.23-P1P2
Esrp2	P1P2	Esrp2_-_106136813.23-P1P2	GCCACACACGCGGACCGACG	1	Esrp2_-_106136783.23-P1P2	GGTCATGGCCGCAGAGGAAG	2	Esrp2_-_106136813.23-P1P2|Esrp2_-_106136783.23-P1P2
Mrps36	P1P2	Mrps36_-_100744598.23-P1P2	GCGAGCAGGGGCAGCTTCCG	1	Mrps36_+_100744449.23-P1P2	GGCAGCGCCGGGAGGAAAGG	2	Mrps36_-_100744598.23-P1P2|Mrps36_+_100744449.23-P1P2
Maff	P1P2	Maff_+_79347560.23-P1P2	GGGAGCCGCGCGCAGTTGTA	1	Maff_-_79347622.23-P1P2	GCCCATAACAAAACTCGGAG	2	Maff_+_79347560.23-P1P2|Maff_-_79347622.23-P1P2
Adora2b	P1P2	Adora2b_+_62249034.23-P1P2	GGGGCTCAGGACAGCTGCTA	1	Adora2b_+_62249063.23-P1P2	GCCCGGGGAGTCCTCTACTG	2	Adora2b_+_62249034.23-P1P2|Adora2b_+_62249063.23-P1P2
Unc119b	P1	Unc119b_-_115134943.23-P1	GAAGATGGCCGCCACCTCAG	1	Unc119b_+_115134917.23-P1	GGAGGTGGCGGCCATCTTGG	2	Unc119b_-_115134943.23-P1|Unc119b_+_115134917.23-P1
Tgif2lx2	ENSMUST00000072518.6	Tgif2lx2_+_118427262.23-ENSMUST00000072518.6	GAGCTGCCCAGAGAGAGTCA	1	Tgif2lx2_-_118427278.23-ENSMUST00000072518.6	GGTCTTCCCTGACTCTCTCT	2	Tgif2lx2_+_118427262.23-ENSMUST00000072518.6|Tgif2lx2_-_118427278.23-ENSMUST00000072518.6
Lipt1	P1P2	Lipt1_-_37872268.23-P1P2	GAGTGTTCTGGGTTCCACGT	1	Lipt1_-_37872243.23-P1P2	GCCCAGCAACTGCGTCTAGA	2	Lipt1_-_37872268.23-P1P2|Lipt1_-_37872243.23-P1P2
Gnaz	P1P2	Gnaz_-_74967515.23-P1P2	GTGGGGACCCGAGATCTATA	1	Gnaz_-_74967164.23-P1P2	GCGACTccgccccctgccgg	2	Gnaz_-_74967515.23-P1P2|Gnaz_-_74967164.23-P1P2
F2rl2	P1P2	F2rl2_-_95697001.23-P1P2	GGCTCATACATGGAGCTGAG	1	F2rl2_-_95697169.23-P1P2	GTAGCATGGGGGTGAGAGAG	2	F2rl2_-_95697001.23-P1P2|F2rl2_-_95697169.23-P1P2
Eya3	P1P2	Eya3_+_132639120.23-P1P2	GACACTGCCCAGCACGACAT	1	Eya3_+_132639148.23-P1P2	GGCGGCGGGGACTCACCAGA	2	Eya3_+_132639120.23-P1P2|Eya3_+_132639148.23-P1P2
Fam19a4	P1P2	Fam19a4_-_97060351.23-P1P2	GGTCCCAGCCAGATCCCAGA	1	Fam19a4_-_97060394.23-P1P2	GAGCAAGTGCGCCCCGTCCA	2	Fam19a4_-_97060351.23-P1P2|Fam19a4_-_97060394.23-P1P2
Ccdc79	P1P2	Ccdc79_+_104509840.23-P1P2	GCACAGGGACGAGCTGGTGT	1	Ccdc79_+_104509814.23-P1P2	GACAGGGGCTCTGGGTTCCA	2	Ccdc79_+_104509840.23-P1P2|Ccdc79_+_104509814.23-P1P2
Tmsb10	P1P2	Tmsb10_+_72958178.23-P1P2	GGGGCTTCGGAGGGAGGGTG	1	Tmsb10_+_72958197.23-P1P2	GGCTAGCAGGCCACGCCCTG	2	Tmsb10_+_72958178.23-P1P2|Tmsb10_+_72958197.23-P1P2
0610030E20Rik	P1P2	0610030E20Rik_-_72347367.23-P1P2	GGCCGAAGGCCCTAATTCCG	1	0610030E20Rik_-_72347388.23-P1P2	GGCAGTTGTGGCGGTTACGG	2	0610030E20Rik_-_72347367.23-P1P2|0610030E20Rik_-_72347388.23-P1P2
Osbpl10	ENSMUST00000183104.1	Osbpl10_-_114978580.23-ENSMUST00000183104.1	GCGGGAGCCCGGAGCTGTAg	1	Osbpl10_-_114978586.23-ENSMUST00000183104.1	GCCCGGAGCTGTAgcggcag	2	Osbpl10_-_114978580.23-ENSMUST00000183104.1|Osbpl10_-_114978586.23-ENSMUST00000183104.1
Eri3	P1P2	Eri3_-_117550370.23-P1P2	GAGAGTGCGCGGAGGTGAGT	1	Eri3_+_117550413.23-P1P2	GGCTTCCCACAGCCCGTTCC	2	Eri3_-_117550370.23-P1P2|Eri3_+_117550413.23-P1P2
Scx	P1P2	Scx_-_76457512.23-P1P2	GCCGCCACCGCGGGGCGCAG	1	Scx_-_76457553.23-P1P2	GCTGTGGGGACCTAAAGAGG	2	Scx_-_76457512.23-P1P2|Scx_-_76457553.23-P1P2
Coq4	P1P2	Coq4_+_29788322.23-P1P2	GCGTACGGGGCCGAAGACTG	1	Coq4_+_29788282.23-P1P2	GAGCAGCAGCAGGGTCGCCA	2	Coq4_+_29788322.23-P1P2|Coq4_+_29788282.23-P1P2
Iqcf3	P1P2	Iqcf3_-_106561577.23-P1P2	GAACCCTGACTGACCATGGT	1	Iqcf3_+_106561603.23-P1P2	GAAAGGAGCAACACCTAGAG	2	Iqcf3_-_106561577.23-P1P2|Iqcf3_+_106561603.23-P1P2
Pdha1	P1P2	Pdha1_-_160138295.23-P1P2	GGCCAACACGCGGGATACAG	1	Pdha1_-_160138336.23-P1P2	GGCGCAGCAGACTCACGCGG	2	Pdha1_-_160138295.23-P1P2|Pdha1_-_160138336.23-P1P2
Slco6b1	P1P2	Slco6b1_+_96997394.23-P1P2	GGCCCCGGTGGACAATACTG	1	Slco6b1_+_96997370.23-P1P2	GCCTCCAGTGGACATCACTG	2	Slco6b1_+_96997394.23-P1P2|Slco6b1_+_96997370.23-P1P2
Ermard	ENSMUST00000040594.8	Ermard_+_15053141.23-ENSMUST00000040594.8	GAGTGAATGGCAGGGTATCC	1	Ermard_-_15053278.23-ENSMUST00000040594.8	GCCGGGATCGTATAAGCCAT	2	Ermard_+_15053141.23-ENSMUST00000040594.8|Ermard_-_15053278.23-ENSMUST00000040594.8
Zfp758	P1P2	Zfp758_-_22361700.23-P1P2	GTCAGCAGCGCAGCCCTGGA	1	Zfp758_-_22361696.23-P1P2	GAGAGTCAGCAGCGCAGCCC	2	Zfp758_-_22361700.23-P1P2|Zfp758_-_22361696.23-P1P2
Cox6c	P1P2	Cox6c_+_35938166.23-P1P2	GGCGCATGCGTGCTGCTGGA	1	Cox6c_+_35937932.23-P1P2	GGCCTGACCGGCCTGAACTC	2	Cox6c_+_35938166.23-P1P2|Cox6c_+_35937932.23-P1P2
Trim14	P1P2	Trim14_+_46536076.23-P1P2	GCAGCGGTTGCCACTGAGAA	1	Trim14_-_46536088.23-P1P2	GTCTCGCTCGCCATTCTCAG	2	Trim14_+_46536076.23-P1P2|Trim14_-_46536088.23-P1P2
Ccdc64b	P1P2	Ccdc64b_-_23660535.23-P1P2	GGGGATCGGGGAACCTCGGA	1	Ccdc64b_-_23660567.23-P1P2	GCGACAGGTGAGAGCCTAGG	2	Ccdc64b_-_23660535.23-P1P2|Ccdc64b_-_23660567.23-P1P2
Pip5k1b	P1P2	Pip5k1b_+_24556053.23-P1P2	GGTTCTGCCGACCAGAGGAG	1	Pip5k1b_-_24556229.23-P1P2	GCAGCGAGCAGGCTGCACGG	2	Pip5k1b_+_24556053.23-P1P2|Pip5k1b_-_24556229.23-P1P2
Nudt10	ENSMUST00000103006.3	Nudt10_-_6172926.23-ENSMUST00000103006.3	GCCGCGCAGCCGAGGAGCAA	1	Nudt10_+_6172858.23-ENSMUST00000103006.3	GCTGCAAGCGACCTCAGAGG	2	Nudt10_-_6172926.23-ENSMUST00000103006.3|Nudt10_+_6172858.23-ENSMUST00000103006.3
Cacna2d1	P1P2	Cacna2d1_+_15934786.23-P1P2	GTCGCCTGCGCCGCCATCAA	1	Cacna2d1_-_15934828.23-P1P2	GAGGCAGCCGTGGCACGGAG	2	Cacna2d1_+_15934786.23-P1P2|Cacna2d1_-_15934828.23-P1P2
Fmnl1	P1P2	Fmnl1_+_103171169.23-P1P2	GTAGGTGGCTCTCGGCTCAG	1	Fmnl1_+_103171215.23-P1P2	GCCGGGAGCCTGGAAGCGAA	2	Fmnl1_+_103171169.23-P1P2|Fmnl1_+_103171215.23-P1P2
Pfn1	P1P2	Pfn1_+_70654580.23-P1P2	GAACAGAGCCGCGTTCCGGA	1	Pfn1_-_70654395.23-P1P2	GGGACGGCGGCCCAGACGGA	2	Pfn1_+_70654580.23-P1P2|Pfn1_-_70654395.23-P1P2
Alcam	P1P2	Alcam_-_52452958.23-P1P2	Ggaggcagaggctgtagcgg	1	Alcam_-_52452940.23-P1P2	GTCTCCTCAggtggcagccg	2	Alcam_-_52452958.23-P1P2|Alcam_-_52452940.23-P1P2
Oit3	P1P2	Oit3_+_59441739.23-P1P2	GTAAGTGCTTGAGAGAACAA	1	Oit3_+_59441699.23-P1P2	GGGAATCTTCTATCCACTCC	2	Oit3_+_59441739.23-P1P2|Oit3_+_59441699.23-P1P2
Fam103a1	P1P2	Fam103a1_-_81763009.23-P1P2	GTTACCTTGGAGAGCCGGGT	1	Fam103a1_-_81763189.23-P1P2	GTCCGCAGCTCGGCTCCTGA	2	Fam103a1_-_81763009.23-P1P2|Fam103a1_-_81763189.23-P1P2
Ppp2r2b	ENSMUST00000025377.7	Ppp2r2b_+_43059486.23-ENSMUST00000025377.7	GGAAGCTTCAGCCAATGAAG	1	Ppp2r2b_+_43059144.23-ENSMUST00000025377.7	GTGAAGGTACAGATCAGAGG	2	Ppp2r2b_+_43059486.23-ENSMUST00000025377.7|Ppp2r2b_+_43059144.23-ENSMUST00000025377.7
Fuom	P1P2	Fuom_+_140102374.23-P1P2	GCGGCCATGGTTGCGCTCAA	1	Fuom_-_140102369.23-P1P2	GGCTCAGGAGACAGCACCTT	2	Fuom_+_140102374.23-P1P2|Fuom_-_140102369.23-P1P2
Gpank1	P1P2	Gpank1_+_35121546.23-P1P2	GATCAGCCCGAGGACCTACC	1	Gpank1_+_35121616.23-P1P2	GTGGCCTGGCACAGGGAAGA	2	Gpank1_+_35121546.23-P1P2|Gpank1_+_35121616.23-P1P2
Rtkn	P2	Rtkn_-_83137155.23-P2	GGCCAGCGTCGGGGAGTCAG	1	Rtkn_+_83137100.23-P2	GCCTTGGGTCTAAGTTGCTG	2	Rtkn_-_83137155.23-P2|Rtkn_+_83137100.23-P2
AI606181	ENSMUST00000099454.3	AI606181_-_41593384.23-ENSMUST00000099454.3	GCCCACTCATCTGTAACCCA	1	AI606181_+_41593364.23-ENSMUST00000099454.3	GACCATGGGTTACAGATGAG	2	AI606181_-_41593384.23-ENSMUST00000099454.3|AI606181_+_41593364.23-ENSMUST00000099454.3
F2	P1P2	F2_-_91636422.23-P1P2	GGTCAGCTCCTGGGATCTGA	1	F2_-_91636220.23-P1P2	GCTGGTCTGAGGACCACCTG	2	F2_-_91636422.23-P1P2|F2_-_91636220.23-P1P2
Nlrc3	P1P2	Nlrc3_-_3976516.23-P1P2	GCCTTCTCTGAAGAGATCAG	1	Nlrc3_-_3976462.23-P1P2	GGTCAGTGGCAGGTCAGCTG	2	Nlrc3_-_3976516.23-P1P2|Nlrc3_-_3976462.23-P1P2
Ddx26b	P1P2	Ddx26b_-_56454939.23-P1P2	GTAGGCAGTAGTCCTGGCAG	1	Ddx26b_-_56454921.23-P1P2	GTGAGCGTGGACGGATGCTT	2	Ddx26b_-_56454939.23-P1P2|Ddx26b_-_56454921.23-P1P2
Mllt4	P1P2	Mllt4_-_13760560.23-P1P2	Gcggctgaggcgggctgaag	1	Mllt4_-_13760601.23-P1P2	Ggagcccggcggaggacgcg	2	Mllt4_-_13760560.23-P1P2|Mllt4_-_13760601.23-P1P2
C1rl	P1P2	C1rl_-_124493183.23-P1P2	GAGAGGCCTGGTCCCAGAGC	1	C1rl_+_124493146.23-P1P2	GGCCTCTGAACCCTGACATC	2	C1rl_-_124493183.23-P1P2|C1rl_+_124493146.23-P1P2
Nkain2	P1P2	Nkain2_+_32890117.23-P1P2	GcACGCGGAGCGCAGAACAG	1	Nkain2_-_32890097.23-P1P2	GGGTGCGCGGGCTCCCGGGG	2	Nkain2_+_32890117.23-P1P2|Nkain2_-_32890097.23-P1P2
Slirp	P1P2	Slirp_-_87443952.23-P1P2	GGGCAGCCTCCGCCATAAAG	1	Slirp_+_87443969.23-P1P2	GGCAATAGGCCGACCAGTAC	2	Slirp_-_87443952.23-P1P2|Slirp_+_87443969.23-P1P2
Rgl3	P1P2	Rgl3_+_21989426.23-P1P2	GGCCCTTCCGCTTCACTCAG	1	Rgl3_-_21989368.23-P1P2	GCCCCAGCTTCCTCTTACCA	2	Rgl3_+_21989426.23-P1P2|Rgl3_-_21989368.23-P1P2
Lrrc30	P1P2	Lrrc30_-_67632651.23-P1P2	GCTCCCAACGTCAGACTGGT	1	Lrrc30_-_67632668.23-P1P2	GGTAGGCAGTGGCAGTGTGG	2	Lrrc30_-_67632651.23-P1P2|Lrrc30_-_67632668.23-P1P2
Capn9	P1P2	Capn9_+_124576147.23-P1P2	GTCAGGGACCGATGCAGGTA	1	Capn9_+_124576188.23-P1P2	GGATAGTCCTGGCATCCCCG	2	Capn9_+_124576147.23-P1P2|Capn9_+_124576188.23-P1P2
L1td1	P1P2	L1td1_-_98726845.23-P1P2	GACCTCGTGGCTCTCAGGTA	1	L1td1_+_98726861.23-P1P2	GAGAAACACGGGGACATCTG	2	L1td1_-_98726845.23-P1P2|L1td1_+_98726861.23-P1P2
Sh2b1	P1P2	Sh2b1_+_126475073.23-P1P2	GAGCCCGTCGCGGAGGCGGG	1	Sh2b1_+_126475083.23-P1P2	GGCGTGCTGGGAGCCCGTCG	2	Sh2b1_+_126475073.23-P1P2|Sh2b1_+_126475083.23-P1P2
Lmln	P1P2	Lmln_-_33062554.23-P1P2	GGACGCCGGCCCGAAGATGG	1	Lmln_-_33062551.23-P1P2	GAACGACGCCGGCCCGAAGA	2	Lmln_-_33062554.23-P1P2|Lmln_-_33062551.23-P1P2
Hint1	P1P2	Hint1_-_54866483.23-P1P2	GGCGCGGGAAGGACAGTGAG	1	Hint1_+_54866446.23-P1P2	GCCGCGCCGCGGCCACAGTG	2	Hint1_-_54866483.23-P1P2|Hint1_+_54866446.23-P1P2
Irs4	P1P2	Irs4_+_141725194.23-P1P2	GAAACCACGGTGCATCACCA	1	Irs4_+_141725159.23-P1P2	GCTCTGGCCACCAAGCGCTT	2	Irs4_+_141725194.23-P1P2|Irs4_+_141725159.23-P1P2
Trp53i11	P1P2	Trp53i11_+_93187646.23-P1P2	GGCGCCGCGCTAGGCAggca	1	Trp53i11_-_93187600.23-P1P2	GAGTGCGGGCCGCCAGACTC	2	Trp53i11_+_93187646.23-P1P2|Trp53i11_-_93187600.23-P1P2
Olfr1454	ENSMUST00000073732.2	Olfr1454_-_13063668.23-ENSMUST00000073732.2	GTCATAGCTGGATTTCTTAT	1	Olfr1454_-_13063613.23-ENSMUST00000073732.2	GCTAGGTAACCTGTCCTTGG	2	Olfr1454_-_13063668.23-ENSMUST00000073732.2|Olfr1454_-_13063613.23-ENSMUST00000073732.2
Cenpp	P1P2	Cenpp_-_49652713.23-P1P2	GTACCGACGTGGAACCCTGA	1	Cenpp_+_49652722.23-P1P2	GGCCCAGACTGCCATTCTCC	2	Cenpp_-_49652713.23-P1P2|Cenpp_+_49652722.23-P1P2
Trabd	P1P2	Trabd_+_89076126.23-P1P2	GGGCGTACCGAGAGAGGCGG	1	Trabd_+_89076129.23-P1P2	GCACGGCGTACCGAGAGAGG	2	Trabd_+_89076126.23-P1P2|Trabd_+_89076129.23-P1P2
Fpgt	P1P2	Fpgt_+_155093289.23-P1P2	GTCTGAGCTGAGAGGTACCA	1	Fpgt_+_155093326.23-P1P2	GTCTCCGCGAAGCCACCCTG	2	Fpgt_+_155093289.23-P1P2|Fpgt_+_155093326.23-P1P2
Vmn2r111	ENSMUST00000092491.5	Vmn2r111_-_22573142.23-ENSMUST00000092491.5	GTGTACTGCATGAATCACAA	1	Vmn2r111_-_22572823.23-ENSMUST00000092491.5	GTGTCTAGGAGAGATATTTA	2	Vmn2r111_-_22573142.23-ENSMUST00000092491.5|Vmn2r111_-_22572823.23-ENSMUST00000092491.5
Zfp112	P1P2	Zfp112_+_24112441.23-P1P2	GGAGGGGTCAGTAAAGGGGA	1	Zfp112_+_24112445.23-P1P2	GTCGGGAGGGGTCAGTAAAG	2	Zfp112_+_24112441.23-P1P2|Zfp112_+_24112445.23-P1P2
Zfp521	P1P2	Zfp521_-_13972434.23-P1P2	GcggcggcgAgagcaggagg	1	Zfp521_-_13972596.23-P1P2	GCATCAGGATGGCTCCAGAG	2	Zfp521_-_13972434.23-P1P2|Zfp521_-_13972596.23-P1P2
Golph3	P1P2	Golph3_+_12321480.23-P1P2	GAGCCCAGGAGCCCGAgcgg	1	Golph3_+_12321534.23-P1P2	GGCGTCGATGGGGTACACAA	2	Golph3_+_12321480.23-P1P2|Golph3_+_12321534.23-P1P2
Lrrc10b	P1P2	Lrrc10b_-_10457467.23-P1P2	GGCCGTGCCGAGCCGAGAGG	1	Lrrc10b_+_10457532.23-P1P2	GGCCAGTCGGCCTCCGGCGG	2	Lrrc10b_-_10457467.23-P1P2|Lrrc10b_+_10457532.23-P1P2
Wdr12	P1P2	Wdr12_-_60097481.23-P1P2	GGATCGGCTCCTGGAAGACA	1	Wdr12_+_60097495.23-P1P2	GGAGAACAAGAAGTAAGTAA	2	Wdr12_-_60097481.23-P1P2|Wdr12_+_60097495.23-P1P2
App	P1P2	App_+_85173670.23-P1P2	GGGCGGGAGGCGAGAGCACC	1	App_+_85173639.23-P1P2	GAGCGCGGGGCCACCGGAGA	2	App_+_85173670.23-P1P2|App_+_85173639.23-P1P2
Chmp4b	P1P2	Chmp4b_-_154657150.23-P1P2	Gagccgagccgagccggagt	1	Chmp4b_-_154657187.23-P1P2	GcggCGAGCAGCAACCATGT	2	Chmp4b_-_154657150.23-P1P2|Chmp4b_-_154657187.23-P1P2
Mrps16	P1P2	Mrps16_-_20393280.23-P1P2	Gtaatcacagggcctttggg	1	Mrps16_-_20393509.23-P1P2	GACCATGGTGCCTGGGCGAG	2	Mrps16_-_20393280.23-P1P2|Mrps16_-_20393509.23-P1P2
Rln1	P1P2	Rln1_+_29334626.23-P1P2	GCAGGAGCCCAGTCCCGCCA	1	Rln1_-_29334575.23-P1P2	GTAGCCAGAACCCCAGGAGC	2	Rln1_+_29334626.23-P1P2|Rln1_-_29334575.23-P1P2
8430427H17Rik	ENSMUST00000035346.7	8430427H17Rik_+_153529875.23-ENSMUST00000035346.7	GCCGCGCCAGAGCCACACCG	1	8430427H17Rik_-_153530084.23-ENSMUST00000035346.7	GTCCGGGCCCGGAGGTGCAG	2	8430427H17Rik_+_153529875.23-ENSMUST00000035346.7|8430427H17Rik_-_153530084.23-ENSMUST00000035346.7
Elk3	P1P2	Elk3_+_93310814.23-P1P2	GTGTCAGCATGGAAAGTCGG	1	Elk3_-_93310785.23-P1P2	GAGCGTTTGGGAGTCTTCTT	2	Elk3_+_93310814.23-P1P2|Elk3_-_93310785.23-P1P2
Slc34a1	P1P2	Slc34a1_-_55399746.23-P1P2	GCACAGTCAAGGTGAGCCCA	1	Slc34a1_+_55399685.23-P1P2	GTGCTTGGGGAAGTCTAAAG	2	Slc34a1_-_55399746.23-P1P2|Slc34a1_+_55399685.23-P1P2
Sytl1	P1	Sytl1_-_133263020.23-P1	GGTAGGGACGACAACTTCAA	1	Sytl1_-_133263070.23-P1	GAGAGACTAGAAAGGCTGTG	2	Sytl1_-_133263020.23-P1|Sytl1_-_133263070.23-P1
Kcnj5	P1P2	Kcnj5_-_32344272.23-P1P2	GTCGCAGGTCCAGCTAGCAG	1	Kcnj5_+_32344288.23-P1P2	GGCGAGGCAGACCGGTGAAG	2	Kcnj5_-_32344272.23-P1P2|Kcnj5_+_32344288.23-P1P2
Zfp397	P1P2	Zfp397_+_23954723.23-P1P2	GGGAGCCCCAGCTACAGCGG	1	Zfp397_+_23954706.23-P1P2	GGGAGGAGCAGCCCGAGTAG	2	Zfp397_+_23954723.23-P1P2|Zfp397_+_23954706.23-P1P2
Osbpl8	P1P2	Osbpl8_-_111164872.23-P1P2	GAGCTGggcggcggtggtag	1	Osbpl8_-_111164821.23-P1P2	GCAGAAAGGCGGTGTCAGGG	2	Osbpl8_-_111164872.23-P1P2|Osbpl8_-_111164821.23-P1P2
Eif1	P1P2	Eif1_+_100319978.23-P1P2	GCTCAGTGACTGGGGCGGAG	1	Eif1_+_100320538.23-P1P2	GCGTGCTGGAGAGACCTAGT	2	Eif1_+_100319978.23-P1P2|Eif1_+_100320538.23-P1P2
Baz1a	P1P2	Baz1a_+_54986310.23-P1P2	GACTTCCCGGGAGCGCGGAG	1	Baz1a_+_54986322.23-P1P2	GAGTAGCTCAGAAACTTCCC	2	Baz1a_+_54986310.23-P1P2|Baz1a_+_54986322.23-P1P2
Tpmt	P1P2	Tpmt_+_47043144.23-P1P2	GCACAGCTCCCGGCTTACAA	1	Tpmt_+_47043125.23-P1P2	GAGGCGGGCTAGTGTCTGAG	2	Tpmt_+_47043144.23-P1P2|Tpmt_+_47043125.23-P1P2
Pmepa1	P1P2	Pmepa1_+_173276458.23-P1P2	GGACTTGAATGAGGAGCGGG	1	Pmepa1_+_173276479.23-P1P2	GCGGCGCAACCCGATCTCCT	2	Pmepa1_+_173276458.23-P1P2|Pmepa1_+_173276479.23-P1P2
Bud13	P1P2	Bud13_+_46283022.23-P1P2	GGGAGCTGCCGCCATGGCAG	1	Bud13_+_46283052.23-P1P2	GCGCTTCAGATACTCAGCTT	2	Bud13_+_46283022.23-P1P2|Bud13_+_46283052.23-P1P2
Olfr8	ENSMUST00000081571.1	Olfr8_+_78955593.23-ENSMUST00000081571.1	GCAATGAATGTGTAATACAA	1	Olfr8_+_78955619.23-ENSMUST00000081571.1	GCATCAGTATACAGAGATGT	2	Olfr8_+_78955593.23-ENSMUST00000081571.1|Olfr8_+_78955619.23-ENSMUST00000081571.1
Papolg	P1P2	Papolg_+_23895147.23-P1P2	GGCCTCGGCTGTAGAGAGTG	1	Papolg_+_23895010.23-P1P2	GGAGATGTCTGCGTAAGTGG	2	Papolg_+_23895147.23-P1P2|Papolg_+_23895010.23-P1P2
Nudt16l1	P1P2	Nudt16l1_+_4939147.23-P1P2	GTTCAGCTCCGGAACCGTCG	1	Nudt16l1_-_4939182.23-P1P2	GGAGCTGAAACAGATCAGTC	2	Nudt16l1_+_4939147.23-P1P2|Nudt16l1_-_4939182.23-P1P2
Klhl34	P1P2	Klhl34_-_157818005.23-P1P2	GTCCTGGGGCACCCACAATA	1	Klhl34_+_157817958.23-P1P2	GAGGATGGTGGCTCTGATCG	2	Klhl34_-_157818005.23-P1P2|Klhl34_+_157817958.23-P1P2
Olfr1384	ENSMUST00000060434.2	Olfr1384_-_49513682.23-ENSMUST00000060434.2	GTAGAAGGTTTCCTGTTGGT	1	Olfr1384_+_49513671.23-ENSMUST00000060434.2	GGTCTGAGAAGCCTACCAAC	2	Olfr1384_-_49513682.23-ENSMUST00000060434.2|Olfr1384_+_49513671.23-ENSMUST00000060434.2
Gipc2	P1P2	Gipc2_-_152165902.23-P1P2	GCGGCATCTTGCAGGTCCCA	1	Gipc2_-_152165883.23-P1P2	GTCTTCCCGCGCAGTCCAAG	2	Gipc2_-_152165902.23-P1P2|Gipc2_-_152165883.23-P1P2
Olfr1505	ENSMUST00000081520.2	Olfr1505_+_13919298.23-ENSMUST00000081520.2	GTGGGCAGCACAACGTCCAT	1	Olfr1505_-_13919304.23-ENSMUST00000081520.2	GGTAAAACAGTCGTTTCCTA	2	Olfr1505_+_13919298.23-ENSMUST00000081520.2|Olfr1505_-_13919304.23-ENSMUST00000081520.2
Pemt	P1P2	Pemt_-_60036944.23-P1P2	GATAGCAGTTCTACCACACT	1	Pemt_+_60036660.23-P1P2	GGCTGGGAGGCAGGACGTAG	2	Pemt_-_60036944.23-P1P2|Pemt_+_60036660.23-P1P2
Zfp429	P1P2	Zfp429_+_67399557.23-P1P2	GGAGCGCTTCTGGGCTGGGT	1	Zfp429_+_67399593.23-P1P2	GTGGGGTGGGTGCCAGAGCA	2	Zfp429_+_67399557.23-P1P2|Zfp429_+_67399593.23-P1P2
Acad9	P1P2	Acad9_-_36066115.23-P1P2	GAAGTCAGGAGCAGCATGTC	1	Acad9_-_36066147.23-P1P2	GCTCTCGCGTGGGGCGACTG	2	Acad9_-_36066115.23-P1P2|Acad9_-_36066147.23-P1P2
Noa1	P1P2	Noa1_+_77309854.23-P1P2	GTATGCAGAAGGCCCGGACA	1	Noa1_-_77310049.23-P1P2	GGCCCGCAAGCCAGGCGCGC	2	Noa1_+_77309854.23-P1P2|Noa1_-_77310049.23-P1P2
Olfr655	ENSMUST00000057385.4	Olfr655_-_104597164.23-ENSMUST00000057385.4	GGAAAGTCATGAAACTGGAG	1	Olfr655_-_104597114.23-ENSMUST00000057385.4	GACAGAGAGCCACAAGTGTT	2	Olfr655_-_104597164.23-ENSMUST00000057385.4|Olfr655_-_104597114.23-ENSMUST00000057385.4
Tm2d2	P1P2	Tm2d2_-_25017286.23-P1P2	GGCGTACCCGACGTAGAGAG	1	Tm2d2_-_25017311.23-P1P2	GGACAGCGCCGGGCTCCGGT	2	Tm2d2_-_25017286.23-P1P2|Tm2d2_-_25017311.23-P1P2
Olfr91	ENSMUST00000087144.4	Olfr91_+_37093868.23-ENSMUST00000087144.4	GTCATAGCAGAAACAGACTA	1	Olfr91_+_37093423.23-ENSMUST00000087144.4	GCAGCTGTGGCCTGGATGAT	2	Olfr91_+_37093868.23-ENSMUST00000087144.4|Olfr91_+_37093423.23-ENSMUST00000087144.4
Fam89b	P1	Fam89b_+_5731680.23-P1	GACGGCAACATGGCCTTGAA	1	Fam89b_+_5731653.23-P1	GGTATGCGCTTGGGATGTTT	2	Fam89b_+_5731680.23-P1|Fam89b_+_5731653.23-P1
Clec10a	P1P2	Clec10a_+_70166726.23-P1P2	GATATCCCGGAGGGTTGGTG	1	Clec10a_-_70166894.23-P1P2	GCACAGAGAGGGAGGACGTT	2	Clec10a_+_70166726.23-P1P2|Clec10a_-_70166894.23-P1P2
Mon2	P1P2	Mon2_-_123076340.23-P1P2	GGCTTCAGCGATGCCCGCCC	1	Mon2_+_123076344.23-P1P2	GTAATGGCGTCGGCGGGTCT	2	Mon2_-_123076340.23-P1P2|Mon2_+_123076344.23-P1P2
Mgmt	P1P2	Mgmt_+_136894815.23-P1P2	GCCCGGGGCCAAGGGAAGTA	1	Mgmt_+_136894617.23-P1P2	GGTGCCTGAGCACCAAGATC	2	Mgmt_+_136894815.23-P1P2|Mgmt_+_136894617.23-P1P2
H60c	P1P2	H60c_+_3267500.23-P1P2	GGAGCAGCGCCCAGGGACCC	1	H60c_-_3267677.23-P1P2	GGACCATCAATATCAGAAGC	2	H60c_+_3267500.23-P1P2|H60c_-_3267677.23-P1P2
Wnt5a	P1	Wnt5a_+_28505837.23-P1	GCAGCAAGCGCAGGGCCGAG	1	Wnt5a_+_28505803.23-P1	GGGAGCCGCGGGTCCGACGA	2	Wnt5a_+_28505837.23-P1|Wnt5a_+_28505803.23-P1
Gm364	P1P2	Gm364_-_57409218.23-P1P2	GGCTTTAAGATGGGTCTCAG	1	Gm364_+_57409173.23-P1P2	GGCCTCAGGAACAACCATCC	2	Gm364_-_57409218.23-P1P2|Gm364_+_57409173.23-P1P2
Trub2	P1P2	Trub2_+_29787606.23-P1P2	GACCGCTGAGTTCCAGCCAT	1	Trub2_+_29787597.23-P1P2	GTTCCAGCCATGGGTTCTTC	2	Trub2_+_29787606.23-P1P2|Trub2_+_29787597.23-P1P2
Leap2	P1P2	Leap2_-_53423072.23-P1P2	GCAGCAGCAGCAGGCAAGTC	1	Leap2_+_53423035.23-P1P2	GCTGCTGGGTCAGGTAAGGA	2	Leap2_-_53423072.23-P1P2|Leap2_+_53423035.23-P1P2
Bmp10	P1P2	Bmp10_+_87429050.23-P1P2	GGGCAGAAGACGGCGCTCAG	1	Bmp10_+_87429000.23-P1P2	GTCAGCTCCCAGGCCAACCT	2	Bmp10_+_87429050.23-P1P2|Bmp10_+_87429000.23-P1P2
Fblim1	P1	Fblim1_+_141599833.23-P1	Gcgcggcaggtaagcgggtg	1	Fblim1_+_141599825.23-P1	GgtaagcgggtgcggCGTGG	2	Fblim1_+_141599833.23-P1|Fblim1_+_141599825.23-P1
Ecm2	P1P2	Ecm2_-_49504853.23-P1P2	GTGAAAGGCGTTTATCCCAA	1	Ecm2_-_49505046.23-P1P2	GAAGTTTCTACTATAGTATG	2	Ecm2_-_49504853.23-P1P2|Ecm2_-_49505046.23-P1P2
Ywhag	P1P2	Ywhag_-_135934594.23-P1P2	GCGCGGGACCCGGCGCAAGG	1	Ywhag_-_135934584.23-P1P2	GGAGCTGCGACCGCGGGACC	2	Ywhag_-_135934594.23-P1P2|Ywhag_-_135934584.23-P1P2
Ppp1r3b	P1P2	Ppp1r3b_+_35376704.23-P1P2	GCGCTGCTCGCTGGCCTCAT	1	Ppp1r3b_-_35376670.23-P1P2	GCGACGCTCACGTAGTTCAG	2	Ppp1r3b_+_35376704.23-P1P2|Ppp1r3b_-_35376670.23-P1P2
Dhx36	P1P2	Dhx36_+_62506974.23-P1P2	GGCCCGGACGCCATTTTCAG	1	Dhx36_-_62506944.23-P1P2	GGATAGTCGTAGCTCATTGT	2	Dhx36_+_62506974.23-P1P2|Dhx36_-_62506944.23-P1P2
Olfr224	ENSMUST00000108822.2	Olfr224_+_58570489.23-ENSMUST00000108822.2	GGGAGAGTCAGCATGACACA	1	Olfr224_+_58570509.23-ENSMUST00000108822.2	GATGGTGAGTAAAACCGGAC	2	Olfr224_+_58570489.23-ENSMUST00000108822.2|Olfr224_+_58570509.23-ENSMUST00000108822.2
Nfam1	P1P2	Nfam1_+_83033265.23-P1P2	GCTGAAGCGGAAGGAGGAAC	1	Nfam1_+_83033274.23-P1P2	GTGCAGTGACCTGAAGCGGA	2	Nfam1_+_83033265.23-P1P2|Nfam1_+_83033274.23-P1P2
Tcfl5	P1P2	Tcfl5_+_180642481.23-P1P2	GcgcggcgcTGGGAGAGCCG	1	Tcfl5_+_180642693.23-P1P2	GCCCAACGGCGCGCCCGCGG	2	Tcfl5_+_180642481.23-P1P2|Tcfl5_+_180642693.23-P1P2
Itgb1	P1P2	Itgb1_-_128685784.23-P1P2	GTGAAGAGCCGCCAGACCCG	1	Itgb1_+_128685797.23-P1P2	GTGGTCTCGGGTGGCGTCGG	2	Itgb1_-_128685784.23-P1P2|Itgb1_+_128685797.23-P1P2
Fibp	P1P2	Fibp_-_5460685.23-P1P2	GCTTCGGGCGAACCCGGCCC	1	Fibp_+_5460648.23-P1P2	GCCGAAGCTGGAGCTTGTAC	2	Fibp_-_5460685.23-P1P2|Fibp_+_5460648.23-P1P2
2610028H24Rik	P1P2	2610028H24Rik_-_76449173.23-P1P2	GGGCACCATGATCCCTGAGG	1	2610028H24Rik_+_76449156.23-P1P2	GAGAGCCCCCTCAGGGATCA	2	2610028H24Rik_-_76449173.23-P1P2|2610028H24Rik_+_76449156.23-P1P2
Fzd5	P1P2	Fzd5_+_64737680.23-P1P2	GACAGCTCGGAGCTCCCTGG	1	Fzd5_-_64737710.23-P1P2	GAGCTCCGAGCTGTGCGCGA	2	Fzd5_+_64737680.23-P1P2|Fzd5_-_64737710.23-P1P2
Svopl	P1	Svopl_+_38046973.23-P1	GGTGCTGCCAGAGGGCTGTG	1	Svopl_+_38046938.23-P1	GGCGCACAGGGACCTGGAAT	2	Svopl_+_38046973.23-P1|Svopl_+_38046938.23-P1
Akr1c20	P1P2	Akr1c20_+_4523325.23-P1P2	GTCAGTATCTTCTCAGTCAG	1	Akr1c20_+_4523276.23-P1P2	GAGACAGTTCTTCTAAATGA	2	Akr1c20_+_4523325.23-P1P2|Akr1c20_+_4523276.23-P1P2
Vmac	P1P2	Vmac_+_56716790.23-P1P2	GCCACCTCTGCAGATCCGGG	1	Vmac_-_56716808.23-P1P2	GTCGCCTCCCGGATCTGCAG	2	Vmac_+_56716790.23-P1P2|Vmac_-_56716808.23-P1P2
Zfml	P1P2	Zfml_-_83914403.23-P1P2	GGCGTGTAGTCCCATGGAGG	1	Zfml_-_83914400.23-P1P2	GCATGCGTGTAGTCCCATGG	2	Zfml_-_83914403.23-P1P2|Zfml_-_83914400.23-P1P2
4930563D23Rik	P1P2	4930563D23Rik_+_92321424.23-P1P2	GCTCCCAGAACTCCCCAGAT	1	4930563D23Rik_-_92321401.23-P1P2	GGTTTGTGAAGCGAGCCATG	2	4930563D23Rik_+_92321424.23-P1P2|4930563D23Rik_-_92321401.23-P1P2
Itga2b	P1P2	Itga2b_+_102469676.23-P1P2	GCTGCGCATGGCATTCCCTG	1	Itga2b_-_102469683.23-P1P2	GGTCCACTGCAGAAGCCACA	2	Itga2b_+_102469676.23-P1P2|Itga2b_-_102469683.23-P1P2
4933412E24Rik	P1P2	4933412E24Rik_+_60016518.23-P1P2	GAGAGTGGAGACCTCAACAC	1	4933412E24Rik_+_60016584.23-P1P2	GCTTCCGGGACTGGCAACAT	2	4933412E24Rik_+_60016518.23-P1P2|4933412E24Rik_+_60016584.23-P1P2
Katnbl1	P1P2	Katnbl1_-_112379251.23-P1P2	GgcgcgcggcggTGTTTGAA	1	Katnbl1_+_112379277.23-P1P2	GGGCAGCTCGGAGCGTCCCT	2	Katnbl1_-_112379251.23-P1P2|Katnbl1_+_112379277.23-P1P2
Lamp2	P1P2	Lamp2_-_38456407.23-P1P2	GACCACCGACCGAGGCACCC	1	Lamp2_-_38456399.23-P1P2	GCACGAGAGACCACCGACCG	2	Lamp2_-_38456407.23-P1P2|Lamp2_-_38456399.23-P1P2
Tarsl2	P1P2	Tarsl2_+_65644942.23-P1P2	GGCCAGGGCCTGGGCCGCCA	1	Tarsl2_-_65644962.23-P1P2	GACCATGGCGGCCCAGGCCC	2	Tarsl2_+_65644942.23-P1P2|Tarsl2_-_65644962.23-P1P2
Lrrtm2	P1P2	Lrrtm2_-_35214941.23-P1P2	GCTTGTTGATGGCAGATGGG	1	Lrrtm2_-_35215019.23-P1P2	GCCGAGAAACGGCACAAGAA	2	Lrrtm2_-_35214941.23-P1P2|Lrrtm2_-_35215019.23-P1P2
Bid	P1P2	Bid_+_120916821.23-P1P2	GGGCGAGCACGAGGAAAGGT	1	Bid_+_120916794.23-P1P2	GTAGAGCGCCGGGCCGAGTG	2	Bid_+_120916821.23-P1P2|Bid_+_120916794.23-P1P2
Omt2a	P1P2	Omt2a_-_78313408.23-P1P2	GAGTGTCCATGAAAGATGAA	1	Omt2a_-_78313431.23-P1P2	GGAGTGTAGATCTCAAATAA	2	Omt2a_-_78313408.23-P1P2|Omt2a_-_78313431.23-P1P2
Arhgap31	P1P2	Arhgap31_+_38712826.23-P1P2	GCGCCGCCGGAGCCCGAGTA	1	Arhgap31_+_38712823.23-P1P2	GCGCCGGAGCCCGAGTAGGG	2	Arhgap31_+_38712826.23-P1P2|Arhgap31_+_38712823.23-P1P2
Egfl7	P2	Egfl7_+_26581100.23-P2	GTCCCGGCAGAGCCCTACAT	1	Egfl7_+_26581116.23-P2	GAGAGGGAAGACCCAGGTCC	2	Egfl7_+_26581100.23-P2|Egfl7_+_26581116.23-P2
Olfr974	ENSMUST00000062833.5	Olfr974_-_39942254.23-ENSMUST00000062833.5	GCACTCAACTCATCACATCT	1	Olfr974_+_39942289.23-ENSMUST00000062833.5	GAACCCCTCAAGGACAAATA	2	Olfr974_-_39942254.23-ENSMUST00000062833.5|Olfr974_+_39942289.23-ENSMUST00000062833.5
Sult1c2	P1P2	Sult1c2_-_53845745.23-P1P2	GGAACATACACCAAAAAGTT	1	Sult1c2_-_53845465.23-P1P2	Gtacgtatggagcaggccca	2	Sult1c2_-_53845745.23-P1P2|Sult1c2_-_53845465.23-P1P2
Mrpl35	P1P2	Mrpl35_+_71823751.23-P1P2	GTAGGCAGGCTGCAAGATGG	1	Mrpl35_-_71823732.23-P1P2	GTGACCTGAGGCAGCTCTCA	2	Mrpl35_+_71823751.23-P1P2|Mrpl35_-_71823732.23-P1P2
Tmppe	P1P2	Tmppe_-_114401167.23-P1P2	GCAGAGCGCCCACTGCCTAA	1	Tmppe_-_114401183.23-P1P2	GTAACGGAGAGACCCCATCG	2	Tmppe_-_114401167.23-P1P2|Tmppe_-_114401183.23-P1P2
Dnaic1	P1P2	Dnaic1_-_41569881.23-P1P2	GTGGTGACTGGGAATTGAAG	1	Dnaic1_+_41569898.23-P1P2	GCTCCTTCTTGACCACACAC	2	Dnaic1_-_41569881.23-P1P2|Dnaic1_+_41569898.23-P1P2
Ttc9b	P1P2	Ttc9b_+_27653969.23-P1P2	GGGGCGCGGTGGAGGCTCCG	1	Ttc9b_-_27654322.23-P1P2	GCGCCTGGTGGAGAACACAG	2	Ttc9b_+_27653969.23-P1P2|Ttc9b_-_27654322.23-P1P2
Fam192a	P1P2	Fam192a_+_94601656.23-P1P2	GAGGAACAGGAAGCCCCGAA	1	Fam192a_+_94601648.23-P1P2	GGAAGCCCCGAAGGGTCAAA	2	Fam192a_+_94601656.23-P1P2|Fam192a_+_94601648.23-P1P2
Ier5l	P1P2	Ier5l_+_30474159.23-P1P2	GGGTGGCGCGCAACGCATGG	1	Ier5l_+_30474179.23-P1P2	GCTGGGGAGCGTGAGCCTGC	2	Ier5l_+_30474159.23-P1P2|Ier5l_+_30474179.23-P1P2
Tctex1d2	P1P2	Tctex1d2_+_32419828.23-P1P2	GGGAGTGAGCCGATAAGGAC	1	Tctex1d2_+_32419833.23-P1P2	GCCCTCGGAGTGAGCCGATA	2	Tctex1d2_+_32419828.23-P1P2|Tctex1d2_+_32419833.23-P1P2
Dpp6	P2	Dpp6_-_27049411.23-P2	GGCAGAGTCGCTCAACACCC	1	Dpp6_-_27049440.23-P2	GACTCGCGTGTGGCGCGGAG	2	Dpp6_-_27049411.23-P2|Dpp6_-_27049440.23-P2
Ankrd44	P1P2	Ankrd44_+_54926308.23-P1P2	GGGCTCTGAGAGGCAGGCGG	1	Ankrd44_-_54926282.23-P1P2	GCCAGGAGCTGGGCTCGCGA	2	Ankrd44_+_54926308.23-P1P2|Ankrd44_-_54926282.23-P1P2
Brox	ENSMUST00000057062.5	Brox_-_183296981.23-ENSMUST00000057062.5	GGGAGTCCTCCAGCGAGACA	1	Brox_-_183296949.23-ENSMUST00000057062.5	GCTCTTCCTGCTGAAGGAAA	2	Brox_-_183296981.23-ENSMUST00000057062.5|Brox_-_183296949.23-ENSMUST00000057062.5
Hist1h2af	P1P2	Hist1h2af_+_23533904.23-P1P2	GTGCCGCGTCCAGACATTGT	1	Hist1h2af_-_23533917.23-P1P2	GGCAAGGTACCTACAATGTC	2	Hist1h2af_+_23533904.23-P1P2|Hist1h2af_-_23533917.23-P1P2
Pglyrp2	P1	Pglyrp2_-_32420925.23-P1	GTCGGAGGCCCTAGGAGGAT	1	Pglyrp2_-_32420920.23-P1	GGAACCTCGGAGGCCCTAGG	2	Pglyrp2_-_32420925.23-P1|Pglyrp2_-_32420920.23-P1
Pydc3	P1P2	Pydc3_+_173673925.23-P1P2	GGTGGTATCCAGCCTTTGCA	1	Pydc3_+_173673972.23-P1P2	GTCATAGAGAAAGCACGGGG	2	Pydc3_+_173673925.23-P1P2|Pydc3_+_173673972.23-P1P2
Slc30a1	P1P2	Slc30a1_-_191906872.23-P1P2	GCCGATGCTCGGCAGCCCCT	1	Slc30a1_+_191906836.23-P1P2	GGCATCGGACCGAAGCGCTC	2	Slc30a1_-_191906872.23-P1P2|Slc30a1_+_191906836.23-P1P2
Col27a1	P1	Col27a1_+_63215489.23-P1	GGGCCGCTAGCGGTCTCTGG	1	Col27a1_-_63215439.23-P1	GCTCTCCTCCCCCAGGCCGG	2	Col27a1_+_63215489.23-P1|Col27a1_-_63215439.23-P1
Emp1	P1P2	Emp1_-_135363073.23-P1P2	GCAGCCTGCTCTACCACCCA	1	Emp1_+_135363080.23-P1P2	GCTGGAGTATCCAGTGAGAG	2	Emp1_-_135363073.23-P1P2|Emp1_+_135363080.23-P1P2
Fam222a	P1P2	Fam222a_+_114568384.23-P1P2	GGAAGGGCACCAAATCTCAG	1	Fam222a_+_114568400.23-P1P2	GTATCAGGCAGTCGGACGAA	2	Fam222a_+_114568384.23-P1P2|Fam222a_+_114568400.23-P1P2
Ccdc42	P2	Ccdc42_-_68594084.23-P2	GTGTCCAGGCCAGAGGTTAT	1	Ccdc42_-_68594285.23-P2	GCGGCTGGCCCGCTACATGG	2	Ccdc42_-_68594084.23-P2|Ccdc42_-_68594285.23-P2
Olfr1110	ENSMUST00000099861.1	Olfr1110_+_87136250.23-ENSMUST00000099861.1	GCCTGACTGAAAATCCTAAT	1	Olfr1110_+_87136276.23-ENSMUST00000099861.1	GGGTGTGAGTGAATTCATTC	2	Olfr1110_+_87136250.23-ENSMUST00000099861.1|Olfr1110_+_87136276.23-ENSMUST00000099861.1
Abcg3	P1P2	Abcg3_+_104982659.23-P1P2	GCTCCTGACCACGACCACAG	1	Abcg3_-_104982667.23-P1P2	GAGAGCTCTTGGAGCCTCTG	2	Abcg3_+_104982659.23-P1P2|Abcg3_-_104982667.23-P1P2
Reg2	P1P2	Reg2_+_78405137.23-P1P2	GATACTGCCTGGCTACGTAA	1	Reg2_-_78405363.23-P1P2	GTAAGTATATGGGGATACAA	2	Reg2_+_78405137.23-P1P2|Reg2_-_78405363.23-P1P2
Gm8765	ENSMUST00000099518.2	Gm8765_-_50698813.23-ENSMUST00000099518.2	Gttggttaatttcagaattc	1	Gm8765_+_50698394.23-ENSMUST00000099518.2	GTGGAGCTGTTGCTCATCCA	2	Gm8765_-_50698813.23-ENSMUST00000099518.2|Gm8765_+_50698394.23-ENSMUST00000099518.2
Lhx2	P1P2	Lhx2_+_38351274.23-P1P2	GCAAAGGCGAACTGGAGTAG	1	Lhx2_-_38351317.23-P1P2	GGTTGGGAACACACCCCGGG	2	Lhx2_+_38351274.23-P1P2|Lhx2_-_38351317.23-P1P2
Clec2d	P1P2	Clec2d_+_129180704.23-P1P2	GTGCCTGTGGGACTAAGCAT	1	Clec2d_+_129180700.23-P1P2	GTGTGGGACTAAGCATAGGT	2	Clec2d_+_129180704.23-P1P2|Clec2d_+_129180700.23-P1P2
Pcdhb7	P1P2	Pcdhb7_-_37341772.23-P1P2	GGACATTACGGAGCTATGAA	1	Pcdhb7_-_37341760.23-P1P2	GAAGAGCTTGGCAGACATTA	2	Pcdhb7_-_37341772.23-P1P2|Pcdhb7_-_37341760.23-P1P2
Anks6	P1P2	Anks6_+_47057275.23-P1P2	GggagcgggcggTCAGCGAT	1	Anks6_+_47057312.23-P1P2	Gacgcgcgcggccccggggt	2	Anks6_+_47057275.23-P1P2|Anks6_+_47057312.23-P1P2
Mier2	P1P2	Mier2_-_79555033.23-P1P2	GGCCGGACCAGGTCGACCCA	1	Mier2_+_79555061.23-P1P2	GCATGGCGGAGGTGAGTGAG	2	Mier2_-_79555033.23-P1P2|Mier2_+_79555061.23-P1P2
Zfp7	P1P2	Zfp7_-_76879349.23-P1P2	GTGGGATCCACCACGCGCCG	1	Zfp7_+_76879334.23-P1P2	GCACCTGCCCCGGCGCGTGG	2	Zfp7_-_76879349.23-P1P2|Zfp7_+_76879334.23-P1P2
Phf21b	P1	Phf21b_-_84856086.23-P1	GGCGCGCCTGGATCTCGCTG	1	Phf21b_+_84856130.23-P1	GGCCCCGGCCCGCTCCATCC	2	Phf21b_-_84856086.23-P1|Phf21b_+_84856130.23-P1
Mum1	P1P2	Mum1_+_80226745.23-P1P2	GGCCGCGGCGGTCCCAACGG	1	Mum1_+_80226748.23-P1P2	GCAGGCCGCGGCGGTCCCAA	2	Mum1_+_80226745.23-P1P2|Mum1_+_80226748.23-P1P2
Tlr5	P1P2	Tlr5_-_182954851.23-P1P2	GAGCCGAGTGAGGTCAGTCC	1	Tlr5_-_182954841.23-P1P2	GTGGTGCCTGGAGCCGAGTG	2	Tlr5_-_182954851.23-P1P2|Tlr5_-_182954841.23-P1P2
Skor2	P1P2	Skor2_+_76856188.23-P1P2	GGTGGGTGCGCGGAAACCCG	1	Skor2_+_76856170.23-P1P2	GGCGGCAAGCGAGCCCCAAG	2	Skor2_+_76856188.23-P1P2|Skor2_+_76856170.23-P1P2
Stc1	P1P2	Stc1_-_69029835.23-P1P2	GATGTTGGCACGCCTCACAG	1	Stc1_-_69029452.23-P1P2	GGCAGCTGCAGCGCACGAGG	2	Stc1_-_69029835.23-P1P2|Stc1_-_69029452.23-P1P2
Ghrh	P1P2	Ghrh_-_157346615.23-P1P2	GTGAGCAGGGAGCCGCAACC	1	Ghrh_-_157346632.23-P1P2	GCCAggagagacctgcgacc	2	Ghrh_-_157346615.23-P1P2|Ghrh_-_157346632.23-P1P2
Lman2	P1P2	Lman2_-_55362535.23-P1P2	GAGGAAGCCCAGGCCTCCCT	1	Lman2_+_55362592.23-P1P2	GGGAAGTGGCCGAGAGAACA	2	Lman2_-_55362535.23-P1P2|Lman2_+_55362592.23-P1P2
Srrm4	P1P2	Srrm4_+_116591795.23-P1P2	GGCACGCACGGCAGACGCCC	1	Srrm4_+_116591756.23-P1P2	GTCTGCGCGGTAGAGAAAGC	2	Srrm4_+_116591795.23-P1P2|Srrm4_+_116591756.23-P1P2
Endov	P1P2	Endov_+_119491416.23-P1P2	GTCCTCTGGCGGCCGCTCAG	1	Endov_+_119491430.23-P1P2	GACAGCGACAGGGTTTCCTC	2	Endov_+_119491416.23-P1P2|Endov_+_119491430.23-P1P2
Tbc1d19	P1P2	Tbc1d19_-_53809682.23-P1P2	GGGTCCGGGAGAAGTGTCAG	1	Tbc1d19_-_53809692.23-P1P2	GAAGTGTCAGCGGCCAGGAG	2	Tbc1d19_-_53809682.23-P1P2|Tbc1d19_-_53809692.23-P1P2
Il12rb1	P1P2	Il12rb1_-_70808497.23-P1P2	GTTTCTGAGCGTGGACAAGG	1	Il12rb1_-_70808663.23-P1P2	GCACTCTCCTGGGTAGGGAG	2	Il12rb1_-_70808497.23-P1P2|Il12rb1_-_70808663.23-P1P2
3110062M04Rik	P1P2	3110062M04Rik_-_34877985.23-P1P2	GGCAGAGGGCGCAGAGCCGG	1	3110062M04Rik_-_34878010.23-P1P2	GGGGGACAGGATGGAACCGT	2	3110062M04Rik_-_34877985.23-P1P2|3110062M04Rik_-_34878010.23-P1P2
Dusp10	P1P2	Dusp10_-_184034504.23-P1P2	GAATGAAGCTGAGTGAATGG	1	Dusp10_-_184034533.23-P1P2	GCGCGAGCGCATAGCTGGAG	2	Dusp10_-_184034504.23-P1P2|Dusp10_-_184034533.23-P1P2
Trim41	P1P2	Trim41_-_48817328.23-P1P2	GTAGCGCCATCCTACCGACC	1	Trim41_-_48817333.23-P1P2	GCCATCCTACCGACCAGGCA	2	Trim41_-_48817328.23-P1P2|Trim41_-_48817333.23-P1P2
Arhgef6	P2	Arhgef6_+_57326573.23-P2	GCTGGGTCTGGAAGAACCCT	1	Arhgef6_-_57326620.23-P2	GGCTGCCTGGAGCCAGAACC	2	Arhgef6_+_57326573.23-P2|Arhgef6_-_57326620.23-P2
Pla2g12b	P1P2	Pla2g12b_+_59403715.23-P1P2	GTCGTCCCCAACCCCAGCCA	1	Pla2g12b_-_59403704.23-P1P2	GAGGGCTGTGTATGTCCCCA	2	Pla2g12b_+_59403715.23-P1P2|Pla2g12b_-_59403704.23-P1P2
Rfc2	P1P2	Rfc2_-_134582786.23-P1P2	GTGGCGGGAAGAGCAGCCAC	1	Rfc2_+_134582780.23-P1P2	GTCCTGAACCTCCATTCCGG	2	Rfc2_-_134582786.23-P1P2|Rfc2_+_134582780.23-P1P2
Rhot2	P1P2	Rhot2_+_25844509.23-P1P2	GCGGGTTGAAGGAGAGGGTT	1	Rhot2_+_25844364.23-P1P2	GGGCCGCGGGAAGACCGGTA	2	Rhot2_+_25844509.23-P1P2|Rhot2_+_25844364.23-P1P2
1700028P14Rik	P1P2	1700028P14Rik_+_23652764.23-P1P2	GTAGAGCTGGACGGGCGCTG	1	1700028P14Rik_-_23652795.23-P1P2	GCGTCCAGCTCTACATTATA	2	1700028P14Rik_+_23652764.23-P1P2|1700028P14Rik_-_23652795.23-P1P2
Setd6	P1P2	Setd6_+_95715978.23-P1P2	GAGGGACAGGGCGCGACGAG	1	Setd6_-_95715974.23-P1P2	GGCGCGCGCGGGTAAGTGGC	2	Setd6_+_95715978.23-P1P2|Setd6_-_95715974.23-P1P2
Ppm1k	P1P2	Ppm1k_+_57535405.23-P1P2	GCCAGGAGTGGAAGAGACTG	1	Ppm1k_-_57535483.23-P1P2	GTGGCCAAATGGAGACCCGG	2	Ppm1k_+_57535405.23-P1P2|Ppm1k_-_57535483.23-P1P2
Chchd4	P1P2	Chchd4_+_91473406.23-P1P2	GGAAGCGGCGAGGGAGGTCA	1	Chchd4_-_91473371.23-P1P2	GAGTCCTCTGCAGCTCGCAG	2	Chchd4_+_91473406.23-P1P2|Chchd4_-_91473371.23-P1P2
Ccdc74a	P1P2	Ccdc74a_-_17646513.23-P1P2	GAGCAGCCAGTACTGAGCGG	1	Ccdc74a_+_17646497.23-P1P2	GCGTCGCCGCCGCTCAGTAC	2	Ccdc74a_-_17646513.23-P1P2|Ccdc74a_+_17646497.23-P1P2
Tlcd1	P1P2	Tlcd1_-_78178796.23-P1P2	GGCGCTGGCCAGAGAAGGAA	1	Tlcd1_-_78178773.23-P1P2	GCCCGCGGCAGAAACGATCG	2	Tlcd1_-_78178796.23-P1P2|Tlcd1_-_78178773.23-P1P2
Prdm9	P1P2	Prdm9_+_15564329.23-P1P2	GCAGCCTCGGAACTCCTCAG	1	Prdm9_-_15564302.23-P1P2	GCTCATGGTCCAGAATCCCG	2	Prdm9_+_15564329.23-P1P2|Prdm9_-_15564302.23-P1P2
Myh3	P1P2	Myh3_+_67078389.23-P1P2	GCAGGGAGGGCCACAGTCCA	1	Myh3_-_67078355.23-P1P2	GCACTTTCCTAGTATCTCTG	2	Myh3_+_67078389.23-P1P2|Myh3_-_67078355.23-P1P2
Gpam	P1	Gpam_+_55099439.23-P1	GAGGCGCAGAGCCGAAGCGC	1	Gpam_+_55099404.23-P1	GCCAGGCGCGAGCTGCCGGG	2	Gpam_+_55099439.23-P1|Gpam_+_55099404.23-P1
Tspan7	P1P2	Tspan7_-_10485160.23-P1P2	GCCGCCGGAGCTGAGTAGTA	1	Tspan7_+_10485245.23-P1P2	GCCGGCCAGTAGCCAGAAGT	2	Tspan7_-_10485160.23-P1P2|Tspan7_+_10485245.23-P1P2
Scgb1b2	P1P2	Scgb1b2_+_31291819.23-P1P2	GAAATGGGACCAAGCTGGGT	1	Scgb1b2_+_31291715.23-P1P2	GGGTGGGTATTACTGCGGTG	2	Scgb1b2_+_31291819.23-P1P2|Scgb1b2_+_31291715.23-P1P2
Pcyt2	P1P2	Pcyt2_-_120617882.23-P1P2	GGGCCCCCCGCAAATCCTGG	1	Pcyt2_-_120617879.23-P1P2	GGGAGGCCCCCCGCAAATCC	2	Pcyt2_-_120617882.23-P1P2|Pcyt2_-_120617879.23-P1P2
Zfp932	P1P2	Zfp932_-_109996741.23-P1P2	GGGGAATCAGCGGCCATGTG	1	Zfp932_-_109996633.23-P1P2	GCTTGGAAGTTGTGACATGG	2	Zfp932_-_109996741.23-P1P2|Zfp932_-_109996633.23-P1P2
Tnnt2	P1P2	Tnnt2_-_135836446.23-P1P2	GGTGTGCAGTCCCTGTTCAG	1	Tnnt2_-_135836457.23-P1P2	GCTGTTCAGAGGTAAGACAA	2	Tnnt2_-_135836446.23-P1P2|Tnnt2_-_135836457.23-P1P2
Mtap	P1P2	Mtap_+_89137443.23-P1P2	GGCCGCAGCGTGGGACCGGG	1	Mtap_+_89137452.23-P1P2	GCCACAGCGGGCCGCAGCGT	2	Mtap_+_89137443.23-P1P2|Mtap_+_89137452.23-P1P2
Irx1	P1P2	Irx1_+_71963678.23-P1P2	GCGGCGCGCGATCTCGGATA	1	Irx1_-_71963727.23-P1P2	GGCGGCCGCCCTCCGCTCGG	2	Irx1_+_71963678.23-P1P2|Irx1_-_71963727.23-P1P2
Iars	P1P2	Iars_+_49682177.23-P1P2	GGAACCCGGAGAGCTCGCTC	1	Iars_+_49682198.23-P1P2	GAAGAGGGTGCGGCTTACCT	2	Iars_+_49682177.23-P1P2|Iars_+_49682198.23-P1P2
Plekhb2	P1P2	Plekhb2_+_34850034.23-P1P2	GTGTTCAGGCCGCCAAGACA	1	Plekhb2_+_34850028.23-P1P2	GGGCCGCCAAGACAGGGATC	2	Plekhb2_+_34850034.23-P1P2|Plekhb2_+_34850028.23-P1P2
BC055324	P1P2	BC055324_+_163994764.23-P1P2	GGGGACGGCGTTCCAAGCTG	1	BC055324_+_163994701.23-P1P2	GAGAATGTCGCAGGACGATG	2	BC055324_+_163994764.23-P1P2|BC055324_+_163994701.23-P1P2
Vsig10	P1P2	Vsig10_+_117319353.23-P1P2	GCCAGCGGCGAGGGGCTCCC	1	Vsig10_+_117319368.23-P1P2	GCCTAGGACTCCCCGGCCAG	2	Vsig10_+_117319353.23-P1P2|Vsig10_+_117319368.23-P1P2
Olfr1020	ENSMUST00000055840.4	Olfr1020_-_85849466.23-ENSMUST00000055840.4	GCAACACAGATGGTCAGGAG	1	Olfr1020_+_85849685.23-ENSMUST00000055840.4	GGTGACAGAAGAAGAATAAG	2	Olfr1020_-_85849466.23-ENSMUST00000055840.4|Olfr1020_+_85849685.23-ENSMUST00000055840.4
Trim68	P1P2	Trim68_-_102687239.23-P1P2	GTCCGCAGCGTAGGAAGCAG	1	Trim68_-_102687279.23-P1P2	GGAAGCCGCGATAGCAGCGG	2	Trim68_-_102687239.23-P1P2|Trim68_-_102687279.23-P1P2
Prl3b1	P1P2	Prl3b1_+_27242448.23-P1P2	GAAGTGCTGACAACACCAGA	1	Prl3b1_-_27242423.23-P1P2	GATGGGAGGCATAGAGCTGA	2	Prl3b1_+_27242448.23-P1P2|Prl3b1_-_27242423.23-P1P2
Tex16	ENSMUST00000038546.6	Tex16_-_112093600.23-ENSMUST00000038546.6	GGATTCTGAGAGTTATTCAG	1	Tex16_-_112093531.23-ENSMUST00000038546.6	GGCTTCTGTACAAAGTCTGA	2	Tex16_-_112093600.23-ENSMUST00000038546.6|Tex16_-_112093531.23-ENSMUST00000038546.6
Rnf115	P1P2	Rnf115_-_96727715.23-P1P2	GGCGGCGGGCCGCCCAGAGG	1	Rnf115_-_96727748.23-P1P2	GGTGGCGACCGCAGCACGGG	2	Rnf115_-_96727715.23-P1P2|Rnf115_-_96727748.23-P1P2
Vps41	P1P2	Vps41_-_18717346.23-P1P2	GCAGAGGAGCAGGTAAACGC	1	Vps41_-_18717362.23-P1P2	GCGCTGGCAGAACTAGTTCG	2	Vps41_-_18717346.23-P1P2|Vps41_-_18717362.23-P1P2
Hrasls5	P1P2	Hrasls5_+_7612607.23-P1P2	GCGCCTAGCCCCGGGATCAT	1	Hrasls5_+_7612569.23-P1P2	GGCTGGAACGGAGGTGAGAG	2	Hrasls5_+_7612607.23-P1P2|Hrasls5_+_7612569.23-P1P2
Polrmt	P1P2	Polrmt_-_79746520.23-P1P2	GCGCAGAACCCGGCCAAGCC	1	Polrmt_+_79746534.23-P1P2	GCGGCATGTCGGCGCTCCGG	2	Polrmt_-_79746520.23-P1P2|Polrmt_+_79746534.23-P1P2
Kcnip3	ENSMUST00000088538.5	Kcnip3_-_127482512.23-ENSMUST00000088538.5	GGCCGCCCCAGGCTCCATCG	1	Kcnip3_+_127482546.23-ENSMUST00000088538.5	GCAAGGGACGAGTCCCAGAG	2	Kcnip3_-_127482512.23-ENSMUST00000088538.5|Kcnip3_+_127482546.23-ENSMUST00000088538.5
Gcm2	ENSMUST00000021791.6	Gcm2_+_41109926.23-ENSMUST00000021791.6	GGCAGACAGCACGCAGGACG	1	Gcm2_+_41109963.23-ENSMUST00000021791.6	GCCTGACTAGAGAGAACTAG	2	Gcm2_+_41109926.23-ENSMUST00000021791.6|Gcm2_+_41109963.23-ENSMUST00000021791.6
Sult1a1	P1P2	Sult1a1_+_126676319.23-P1P2	GTACCACTGAGCACCGAGGG	1	Sult1a1_+_126676300.23-P1P2	GAGGCATGGCTCAGAACCCC	2	Sult1a1_+_126676319.23-P1P2|Sult1a1_+_126676300.23-P1P2
B020031M17Rik	ENSMUST00000180768.1	B020031M17Rik_+_119950781.23-ENSMUST00000180768.1	Gtggcctgcctgctccctcc	1	B020031M17Rik_-_119950762.23-ENSMUST00000180768.1	Gcaaggaggctctactgcta	2	B020031M17Rik_+_119950781.23-ENSMUST00000180768.1|B020031M17Rik_-_119950762.23-ENSMUST00000180768.1
Arhgap4	P1P2	Arhgap4_-_73921832.23-P1P2	GCGTGAACGCGTGCACTCGG	1	Arhgap4_-_73921874.23-P1P2	GGACGATAGGAGCTTGGACT	2	Arhgap4_-_73921832.23-P1P2|Arhgap4_-_73921874.23-P1P2
H6pd	P2	H6pd_-_150003105.23-P2	GTCCCCTCATGGCCAATCTG	1	H6pd_+_150003147.23-P2	GTTAGAGGAGGCCGGAGAAA	2	H6pd_-_150003105.23-P2|H6pd_+_150003147.23-P2
Srsf2	P1P2	Srsf2_-_116853026.23-P1P2	GCGGTAGCTACAGTCCTCGT	1	Srsf2_-_116853035.23-P1P2	GCAGTCCTCGTGGGTAGGGA	2	Srsf2_-_116853026.23-P1P2|Srsf2_-_116853035.23-P1P2
Rnf144a	P1P2	Rnf144a_+_26415229.23-P1P2	GCAGGGCGGGGAGGCATAAA	1	Rnf144a_+_26415187.23-P1P2	GTGCACGCGGGAGGCTGACG	2	Rnf144a_+_26415229.23-P1P2|Rnf144a_+_26415187.23-P1P2
Olfr448	ENSMUST00000058668.3	Olfr448_+_42896499.23-ENSMUST00000058668.3	GCTGCATCCGCGGGCTGAGG	1	Olfr448_-_42896450.23-ENSMUST00000058668.3	GTCCACAGGGCCTGTCACGA	2	Olfr448_+_42896499.23-ENSMUST00000058668.3|Olfr448_-_42896450.23-ENSMUST00000058668.3
Srd5a2	P1P2	Srd5a2_-_74047812.23-P1P2	GTGCCAGCACCGGGACCTGA	1	Srd5a2_-_74047823.23-P1P2	GGGACCTGATGGCACACAAT	2	Srd5a2_-_74047812.23-P1P2|Srd5a2_-_74047823.23-P1P2
Olfr1442	ENSMUST00000057924.2	Olfr1442_+_12674238.23-ENSMUST00000057924.2	GTGCGTTCGTCAGTCCTAGG	1	Olfr1442_-_12674232.23-ENSMUST00000057924.2	GGAACAGAACAGAGATGACA	2	Olfr1442_+_12674238.23-ENSMUST00000057924.2|Olfr1442_-_12674232.23-ENSMUST00000057924.2
Calcoco1	P1P2	Calcoco1_+_102722046.23-P1P2	GGAACAGCTGATCCGTCCGT	1	Calcoco1_-_102722032.23-P1P2	GCGTAAGCCCACCCTCAGTT	2	Calcoco1_+_102722046.23-P1P2|Calcoco1_-_102722032.23-P1P2
Jup	P1P2	Jup_-_100397728.23-P1P2	GTGAGCTCGGCGCACTCGGG	1	Jup_-_100397725.23-P1P2	GAACTGAGCTCGGCGCACTC	2	Jup_-_100397728.23-P1P2|Jup_-_100397725.23-P1P2
5031414D18Rik	P1P2	5031414D18Rik_-_75016094.23-P1P2	GCGGAGCTGTTGGCACACGG	1	5031414D18Rik_+_75016102.23-P1P2	GCCCGTGGCAGCGACAGGTT	2	5031414D18Rik_-_75016094.23-P1P2|5031414D18Rik_+_75016102.23-P1P2
Mtcp1	P1P2	Mtcp1_+_75416532.23-P1P2	GACCTGGGAGAAGAGCGGGT	1	Mtcp1_+_75416592.23-P1P2	GAACAGCGCGGGTTCCACAG	2	Mtcp1_+_75416532.23-P1P2|Mtcp1_+_75416592.23-P1P2
Mrgpra2b	ENSMUST00000172559.1	Mrgpra2b_+_47528786.23-ENSMUST00000172559.1	GGAGGATTGGGGAAAGGTAA	1	Mrgpra2b_+_47528798.23-ENSMUST00000172559.1	GTACATCCAACAAGAGGATT	2	Mrgpra2b_+_47528786.23-ENSMUST00000172559.1|Mrgpra2b_+_47528798.23-ENSMUST00000172559.1
Vps37c	P1P2	Vps37c_+_10688821.23-P1P2	GTCCTGCCTTGTAGGCCTAG	1	Vps37c_-_10688837.23-P1P2	GGGCCACCCCTAGGCCTACA	2	Vps37c_+_10688821.23-P1P2|Vps37c_-_10688837.23-P1P2
Arl14ep	P1P2	Arl14ep_+_106974309.23-P1P2	GGGAGCCCAGCGGAGACCCG	1	Arl14ep_-_106974402.23-P1P2	GGCCCCGCGCAGAAACCGAG	2	Arl14ep_+_106974309.23-P1P2|Arl14ep_-_106974402.23-P1P2
Rpl7	P1P2	Rpl7_-_16104365.23-P1P2	GGGAGAGAAGAATCGACTTA	1	Rpl7_+_16104167.23-P1P2	GCAGTACCAGGAGCAAACTG	2	Rpl7_-_16104365.23-P1P2|Rpl7_+_16104167.23-P1P2
Lck	P1	Lck_-_129558317.23-P1	GTCAGCTCAGAGGCCCCCAT	1	Lck_-_129558344.23-P1	GGACAGAAGCGCTGAATCGT	2	Lck_-_129558317.23-P1|Lck_-_129558344.23-P1
Flrt2	P1	Flrt2_+_95692282.23-P1	GCCCAGCGCACATTCCTTGG	1	Flrt2_-_95692318.23-P1	GCGCTGGGAGATAACACCAA	2	Flrt2_+_95692282.23-P1|Flrt2_-_95692318.23-P1
Zfp329	P1P2	Zfp329_-_12818821.23-P1P2	GGCGCGGAAGGACTCACTAC	1	Zfp329_-_12818792.23-P1P2	GGGGAAGCTAAGGAACAGAA	2	Zfp329_-_12818821.23-P1P2|Zfp329_-_12818792.23-P1P2
1700057G04Rik	P1P2	1700057G04Rik_+_92309414.23-P1P2	GCTACCTTAGAGGTTATGGA	1	1700057G04Rik_+_92309418.23-P1P2	GATGGCTACCTTAGAGGTTA	2	1700057G04Rik_+_92309414.23-P1P2|1700057G04Rik_+_92309418.23-P1P2
Irf7	P1P2	Irf7_+_141266380.23-P1P2	GGCTCCGGTACCAGGTATGT	1	Irf7_+_141266335.23-P1P2	GAGGTGAGCTAGTGCCACAG	2	Irf7_+_141266380.23-P1P2|Irf7_+_141266335.23-P1P2
Bmpr1b	P2	Bmpr1b_-_141982145.23-P2	GCGGCAAGGCAGCTACGTAG	1	Bmpr1b_+_141982188.23-P2	GTGACACAGACCTGTGCCAT	2	Bmpr1b_-_141982145.23-P2|Bmpr1b_+_141982188.23-P2
Med25	P1P2	Med25_+_44892387.23-P1P2	GGGgacggcgacggcgtcag	1	Med25_+_44892402.23-P1P2	GACTTCTGTTCGTCCCGGga	2	Med25_+_44892387.23-P1P2|Med25_+_44892402.23-P1P2
Zmiz1	P1P2	Zmiz1_+_25459258.23-P1P2	GAAAGGAACTCGGCGTTAGG	1	Zmiz1_-_25459314.23-P1P2	GACATTAAAAAAGCGAgcgg	2	Zmiz1_+_25459258.23-P1P2|Zmiz1_-_25459314.23-P1P2
Dnajb12	P1P2	Dnajb12_+_59879646.23-P1P2	GCGAGCACGGAACCAGGGAG	1	Dnajb12_+_59879651.23-P1P2	GGAACCCGAGCACGGAACCA	2	Dnajb12_+_59879646.23-P1P2|Dnajb12_+_59879651.23-P1P2
Ccdc9	P1P2	Ccdc9_+_16286503.23-P1P2	GGGTTGGGCGGTGAACACGT	1	Ccdc9_+_16286743.23-P1P2	GCCGGGAGCTGTGGACGCGA	2	Ccdc9_+_16286503.23-P1P2|Ccdc9_+_16286743.23-P1P2
Upk3a	P1P2	Upk3a_-_85017216.23-P1P2	GCATCGCGAAGGCTCATCTC	1	Upk3a_-_85017187.23-P1P2	GGGAGCAGGTGCGCGTTCTC	2	Upk3a_-_85017216.23-P1P2|Upk3a_-_85017187.23-P1P2
[truncated: 20,102 more rows]

## Sheet: 3_4
gene	transcript	sgID_A	protospacer_A	rank_A	sgID_B	protospacer_B	rank_B	sgID_AB
Gimap6	P1P2	Gimap6_+_48708200.23-P1P2	GCAGCGAGCTGCTATTTTGA	3	Gimap6_-_48707964.23-P1P2	GCATACTGGGACTTACCACT	4	Gimap6_+_48708200.23-P1P2|Gimap6_-_48707964.23-P1P2
Nckap5	ENSMUST00000112583.1,ENSMUST00000094609.3	Nckap5_-_126830417.23-ENSMUST00000112583.1,ENSMUST00000094609.3	GGTCCTAGTGCTACCCAGGA	3	Nckap5_+_126830740.23-ENSMUST00000112583.1,ENSMUST00000094609.3	GCCGGGCGATCCCGATCACG	4	Nckap5_-_126830417.23-ENSMUST00000112583.1,ENSMUST00000094609.3|Nckap5_+_126830740.23-ENSMUST00000112583.1,ENSMUST00000094609.3
Adamts8	P1P2	Adamts8_-_30942583.23-P1P2	GGCGACTGCACGGGACGCCG	3	Adamts8_+_30942535.23-P1P2	GTCCTCGGGAAACACCGAGT	4	Adamts8_-_30942583.23-P1P2|Adamts8_+_30942535.23-P1P2
4931429L15Rik	P1P2	4931429L15Rik_-_46315855.23-P1P2	GTGTATGGACAAAGCGGTGT	3	4931429L15Rik_-_46315849.23-P1P2	GCTCACCTGTATGGACAAAG	4	4931429L15Rik_-_46315855.23-P1P2|4931429L15Rik_-_46315849.23-P1P2
Asxl1	P1P2	Asxl1_+_153346056.23-P1P2	GCCCACGGTGGCAGCGGCAG	3	Asxl1_+_153346026.23-P1P2	GCGATGGCTAAGGAATGCGG	4	Asxl1_+_153346056.23-P1P2|Asxl1_+_153346026.23-P1P2
Dnmt3l	P1P2	Dnmt3l_-_78054838.23-P1P2	GGCTCAGGAAGCTTGCCCTT	3	Dnmt3l_+_78054921.23-P1P2	GAGATGGATACAGTAGATGT	4	Dnmt3l_-_78054838.23-P1P2|Dnmt3l_+_78054921.23-P1P2
Creb1	P1P2	Creb1_+_64532868.23-P1P2	GTCCCAGCCGCCCGGGCCAC	3	Creb1_-_64532852.23-P1P2	GCTGGCTGCGGCTCCTCAGT	4	Creb1_+_64532868.23-P1P2|Creb1_-_64532852.23-P1P2
Ermard	ENSMUST00000097393.3	Ermard_-_15041651.23-ENSMUST00000097393.3	GGCCGGAAGCGATGGAGGTA	3	Ermard_+_15041698.23-ENSMUST00000097393.3	GGCTGCGGGCCTGCCAGGAC	4	Ermard_-_15041651.23-ENSMUST00000097393.3|Ermard_+_15041698.23-ENSMUST00000097393.3
Xpo6	P1P2	Xpo6_-_126200400.23-P1P2	GTGCGCGCCACCAGTAGCCG	3	Xpo6_-_126200450.23-P1P2	GCAGCCCAACGCGCCGGAAG	4	Xpo6_-_126200400.23-P1P2|Xpo6_-_126200450.23-P1P2
Olfr178	ENSMUST00000058564.3	Olfr178_+_58889730.23-ENSMUST00000058564.3	GTGATTTCCATTCTTCATGT	3	Olfr178_-_58889760.23-ENSMUST00000058564.3	GAGAATGGAAATCAGGTTAC	4	Olfr178_+_58889730.23-ENSMUST00000058564.3|Olfr178_-_58889760.23-ENSMUST00000058564.3
Tmcc2	P1P2	Tmcc2_-_132367786.23-P1P2	GAGCCAGAGGGCCACAGTCG	3	Tmcc2_-_132367806.23-P1P2	GGGACAGCGAGTAGCGAGGA	4	Tmcc2_-_132367786.23-P1P2|Tmcc2_-_132367806.23-P1P2
2210016F16Rik	P1P2	2210016F16Rik_-_58385147.23-P1P2	GACTCGCGCGGCGAAAGCGG	3	2210016F16Rik_+_58385178.23-P1P2	GAAGTGCTTGGCCCTGGCGG	4	2210016F16Rik_-_58385147.23-P1P2|2210016F16Rik_+_58385178.23-P1P2
Olfr843	ENSMUST00000061365.2	Olfr843_-_19249023.23-ENSMUST00000061365.2	GTACCTCAGAGGATGAACTA	3	Olfr843_-_19249119.23-ENSMUST00000061365.2	GTGGGACAGGCAGCCTGTAT	4	Olfr843_-_19249023.23-ENSMUST00000061365.2|Olfr843_-_19249119.23-ENSMUST00000061365.2
Olfr1167	ENSMUST00000099832.2	Olfr1167_+_88150023.23-ENSMUST00000099832.2	GTTCTTCCTCATGTTTAATC	3	Olfr1167_-_88150078.23-ENSMUST00000099832.2	GCTTATGGAACTGGAGAGAG	4	Olfr1167_+_88150023.23-ENSMUST00000099832.2|Olfr1167_-_88150078.23-ENSMUST00000099832.2
Adc	P1P2	Adc_-_128962135.23-P1P2	GCCAGGCGCGCTGCTAGGGG	3	Adc_-_128962362.23-P1P2	GAGCGAGTGAATCGGATCCT	4	Adc_-_128962135.23-P1P2|Adc_-_128962362.23-P1P2
Ralyl	ENSMUST00000108372.2	Ralyl_+_13946355.23-ENSMUST00000108372.2	GAATCACACAGTGAAAGCCA	3	Ralyl_+_13946617.23-ENSMUST00000108372.2	GTCCTACTACCAGCAGCTAT	4	Ralyl_+_13946355.23-ENSMUST00000108372.2|Ralyl_+_13946617.23-ENSMUST00000108372.2
Clock	P1P2	Clock_+_76304743.23-P1P2	GCCGGGAGGCAGCGCAATCA	3	Clock_+_76304737.23-P1P2	GGGCAGCGCAATCACGGACT	4	Clock_+_76304743.23-P1P2|Clock_+_76304737.23-P1P2
Dab2ip	ENSMUST00000112983.1	Dab2ip_-_35696763.23-ENSMUST00000112983.1	GGGACTGACTGAGGTTAGCA	3	Dab2ip_-_35696783.23-ENSMUST00000112983.1	GGGAACAGCCAGTGGCTAGA	4	Dab2ip_-_35696763.23-ENSMUST00000112983.1|Dab2ip_-_35696783.23-ENSMUST00000112983.1
Kcnd2	P1P2	Kcnd2_+_21215370.23-P1P2	GCTTGTACCCGGAAAGGGAA	3	Kcnd2_+_21215448.23-P1P2	GGCAGAACGCGCCTCGCCCG	4	Kcnd2_+_21215370.23-P1P2|Kcnd2_+_21215448.23-P1P2
Hsph1	P1P2	Hsph1_+_149636266.23-P1P2	GCTCCTCAGTAGGCTACATA	3	Hsph1_-_149635996.23-P1P2	GCAGCGGTCGCTGAACTCGT	4	Hsph1_+_149636266.23-P1P2|Hsph1_-_149635996.23-P1P2
Arhgap11a	P1P2	Arhgap11a_+_113848655.23-P1P2	GGGTCTGATGTGTGCCGAGA	3	Arhgap11a_+_113848590.23-P1P2	GGGCCACAGGCAAGGCTGAT	4	Arhgap11a_+_113848655.23-P1P2|Arhgap11a_+_113848590.23-P1P2
Penk	P1P2	Penk_-_4138595.23-P1P2	GGCACCGAGGGAACAGGCGA	3	Penk_-_4138563.23-P1P2	GTGAGGAACCCCGAGAAAGT	4	Penk_-_4138595.23-P1P2|Penk_-_4138563.23-P1P2
Senp6	P1P2	Senp6_-_80066983.23-P1P2	GTCCACATGGACAGTCGCCG	3	Senp6_+_80066963.23-P1P2	GGCCTCGGCGACTGTCCATG	4	Senp6_-_80066983.23-P1P2|Senp6_+_80066963.23-P1P2
5430435G22Rik	P1P2	5430435G22Rik_+_131688788.23-P1P2	GTGGGTCTCTCTTCTAGGAG	3	5430435G22Rik_-_131689092.23-P1P2	GCCAGCCTGGGAACCTGCAA	4	5430435G22Rik_+_131688788.23-P1P2|5430435G22Rik_-_131689092.23-P1P2
Rapgef1	P1P2	Rapgef1_-_29619859.23-P1P2	Gggagtggcaggcccggtgc	3	Rapgef1_-_29619839.23-P1P2	Gtgcgcgggaggtggagcgg	4	Rapgef1_-_29619859.23-P1P2|Rapgef1_-_29619839.23-P1P2
Ccnf	P1P2	Ccnf_+_24251319.23-P1P2	GGGTCTAAAGCGGCAGTGGA	3	Ccnf_+_24251323.23-P1P2	GGAGCGGTCTAAAGCGGCAG	4	Ccnf_+_24251319.23-P1P2|Ccnf_+_24251323.23-P1P2
Ankrd60	P1P2	Ankrd60_-_173578174.23-P1P2	GAAGTCTGGCGACACGGTGG	3	Ankrd60_+_173578184.23-P1P2	GCAGGTTAGGGGGCACACAG	4	Ankrd60_-_173578174.23-P1P2|Ankrd60_+_173578184.23-P1P2
Desi1	P1P2	Desi1_-_82015955.23-P1P2	GGCTTCACCGGATAGAGATT	3	Desi1_+_82016101.23-P1P2	GTCCGGGCGCGAGCAGCGCA	4	Desi1_-_82015955.23-P1P2|Desi1_+_82016101.23-P1P2
Anapc15	P1P2	Anapc15_+_101896521.23-P1P2	GTGCTAGGGAAGCGAGTCAA	3	Anapc15_-_101896421.23-P1P2	GGACCTGGGGAAACGCTTCC	4	Anapc15_+_101896521.23-P1P2|Anapc15_-_101896421.23-P1P2
A1bg	P1P2	A1bg_+_60920969.23-P1P2	GCAGTCCCTGCTGGAACCCT	3	A1bg_-_60921029.23-P1P2	GTAGGTTCACTGCCAGAATC	4	A1bg_+_60920969.23-P1P2|A1bg_-_60921029.23-P1P2
Agpat6	P1P2	Agpat6_-_23208300.23-P1P2	GCCAGGTCCATCCAACTCAC	3	Agpat6_+_23208395.23-P1P2	GCAGCGGCGTAGACAAAGAC	4	Agpat6_-_23208300.23-P1P2|Agpat6_+_23208395.23-P1P2
Per2	P1P2	Per2_+_91459245.23-P1P2	GTGGGACTAGCGGCTCCGGG	3	Per2_+_91459212.23-P1P2	GGCCGAGCGCACCAAGTGAC	4	Per2_+_91459245.23-P1P2|Per2_+_91459212.23-P1P2
4930550L24Rik	P1P2	4930550L24Rik_-_58911492.23-P1P2	GCGGCTATCTGAAGAAAGTA	3	4930550L24Rik_+_58911640.23-P1P2	GAGCAGCAGGGCTCTAGTGA	4	4930550L24Rik_-_58911492.23-P1P2|4930550L24Rik_+_58911640.23-P1P2
Sarnp	P1P2	Sarnp_+_128822113.23-P1P2	GTTCAAGGTAGGCCTAAGAA	3	Sarnp_-_128821996.23-P1P2	GCGTTACGCGGGGAAGGCTG	4	Sarnp_+_128822113.23-P1P2|Sarnp_-_128821996.23-P1P2
Mettl7a3	P1P2	Mettl7a3_-_100335310.23-P1P2	GCGCTTCGTGGTGGCAGTCG	3	Mettl7a3_-_100335313.23-P1P2	GTTCGTGGTGGCAGTCGGGG	4	Mettl7a3_-_100335310.23-P1P2|Mettl7a3_-_100335313.23-P1P2
Kif27	ENSMUST00000043605.5	Kif27_+_58354563.23-ENSMUST00000043605.5	GCCATCGGAGGAGGCCATGT	3	Kif27_-_58354663.23-ENSMUST00000043605.5	GCGATGAGCGACAGCACTAG	4	Kif27_+_58354563.23-ENSMUST00000043605.5|Kif27_-_58354663.23-ENSMUST00000043605.5
Pygm	P2	Pygm_-_6397712.23-P2	GTATGCTCATGCACCATGAC	3	Pygm_+_6397665.23-P2	GCAATGTCCTTGAACAGGTC	4	Pygm_-_6397712.23-P2|Pygm_+_6397665.23-P2
1110025L11Rik	ENSMUST00000089104.2	1110025L11Rik_-_89063679.23-ENSMUST00000089104.2	GGCAGTCCTAGAATCACAAT	3	1110025L11Rik_-_89063658.23-ENSMUST00000089104.2	GAAGAATGGGGTTGAGAATT	4	1110025L11Rik_-_89063679.23-ENSMUST00000089104.2|1110025L11Rik_-_89063658.23-ENSMUST00000089104.2
Arrdc3	P1P2	Arrdc3_+_80883408.23-P1P2	GGTGGTCTCCTTACAAAGAC	3	Arrdc3_+_80883713.23-P1P2	GGTGTCCCCGCTAGAATACA	4	Arrdc3_+_80883408.23-P1P2|Arrdc3_+_80883713.23-P1P2
Tns1	ENSMUST00000169786.1	Tns1_-_74124560.23-ENSMUST00000169786.1	GTCTGCGACGTGGGGAAGAA	3	Tns1_-_74124380.23-ENSMUST00000169786.1	Gggcccggcggagtcccggg	4	Tns1_-_74124560.23-ENSMUST00000169786.1|Tns1_-_74124380.23-ENSMUST00000169786.1
Capza3	P1P2	Capza3_+_140041627.23-P1P2	GTGAAATGAAGGGTGCTCAC	3	Capza3_+_140041667.23-P1P2	GCGCTGAGTGACATGGCCAG	4	Capza3_+_140041627.23-P1P2|Capza3_+_140041667.23-P1P2
Hsdl2	P1P2	Hsdl2_-_59581782.23-P1P2	GCTGCCCAACACTGGGTAAG	3	Hsdl2_-_59581814.23-P1P2	GGATGGGGTCAGGGGCCAGT	4	Hsdl2_-_59581782.23-P1P2|Hsdl2_-_59581814.23-P1P2
Slfn4	P1P2	Slfn4_+_83175284.23-P1P2	GATCAGAGCTCAACCGCGGA	3	Slfn4_+_83175198.23-P1P2	GAATGCTCGCTGAGGTAAAA	4	Slfn4_+_83175284.23-P1P2|Slfn4_+_83175198.23-P1P2
Mslnl	P1P2	Mslnl_+_25735923.23-P1P2	GTCAGCCCCAGGAGAAACTC	3	Mslnl_+_25736028.23-P1P2	GTGTGGCTGTGACACCTGCC	4	Mslnl_+_25735923.23-P1P2|Mslnl_+_25736028.23-P1P2
Otx2	P2	Otx2_+_48665058.23-P2	GGCTGATCTGCCGGACTGCA	3	Otx2_-_48665049.23-P2	GAGGAGCAAGCGACTGGGTC	4	Otx2_+_48665058.23-P2|Otx2_-_48665049.23-P2
Atp5k	P1P2	Atp5k_-_108434312.23-P1P2	GTGAGCACCGCGCAACAACG	3	Atp5k_-_108434174.23-P1P2	GTACTGGGAGAGGGAGTACG	4	Atp5k_-_108434312.23-P1P2|Atp5k_-_108434174.23-P1P2
Ncor1	P1	Ncor1_+_62457325.23-P1	GGCGGCCGCCCGGCCTGAGG	3	Ncor1_-_62457149.23-P1	GAGGCGCCGAGCCTACTCAC	4	Ncor1_+_62457325.23-P1|Ncor1_-_62457149.23-P1
Cldn11	P1P2	Cldn11_-_31150045.23-P1P2	GTCGAGTAGCCCGGAGCCAG	3	Cldn11_+_31149970.23-P1P2	GGACAGCGTGCAGCGGGGAC	4	Cldn11_-_31150045.23-P1P2|Cldn11_+_31149970.23-P1P2
Acad11	P1P2	Acad11_-_104063769.23-P1P2	GACAGTGGCGGTCATGGAGA	3	Acad11_+_104063716.23-P1P2	GGAATCCACAGACTGTACGG	4	Acad11_-_104063769.23-P1P2|Acad11_+_104063716.23-P1P2
Olfr1222	ENSMUST00000099794.1	Olfr1222_-_89125420.23-ENSMUST00000099794.1	GCTCAACTCCTGCAAAGAAG	3	Olfr1222_+_89125293.23-ENSMUST00000099794.1	GCTCTGTGGCACTCTCGTAA	4	Olfr1222_-_89125420.23-ENSMUST00000099794.1|Olfr1222_+_89125293.23-ENSMUST00000099794.1
Afm	P1P2	Afm_-_90519013.23-P1P2	GTGAGACACTTAAAACTTAC	3	Afm_-_90519079.23-P1P2	GCCACAAAGCCTCAGGACGT	4	Afm_-_90519013.23-P1P2|Afm_-_90519079.23-P1P2
Ceacam20	P1P2	Ceacam20_-_19965470.23-P1P2	GGGGACTACCTGGCACACTG	3	Ceacam20_-_19965581.23-P1P2	GACTTTGCTGGGTGGTTGGG	4	Ceacam20_-_19965470.23-P1P2|Ceacam20_-_19965581.23-P1P2
Dmd	P1P2	Dmd_-_82948924.23-P1P2	GTCACTCACTTGCCCCTTAC	3	Dmd_-_82948900.23-P1P2	GATGTTGACTCACTCAGTGT	4	Dmd_-_82948924.23-P1P2|Dmd_-_82948900.23-P1P2
Ap2b1	P1P2	Ap2b1_-_83302851.23-P1P2	GgcctccgGTGAGTTCAAGG	3	Ap2b1_+_83302780.23-P1P2	GcagTCGGAGAGCACAGCCG	4	Ap2b1_-_83302851.23-P1P2|Ap2b1_+_83302780.23-P1P2
Vps13b	P1P2	Vps13b_+_35371762.23-P1P2	GGCCTCACCTGACGAGGAGT	3	Vps13b_-_35371593.23-P1P2	GTGGCGTGTTTACCTTGGAG	4	Vps13b_+_35371762.23-P1P2|Vps13b_-_35371593.23-P1P2
Armc9	P1P2	Armc9_-_86154818.23-P1P2	GCGGCGAGCTGGCGGTCTGG	3	Armc9_+_86154984.23-P1P2	GCGCAGCGCAGCGGAGTCGG	4	Armc9_-_86154818.23-P1P2|Armc9_+_86154984.23-P1P2
Arhgef4	P1	Arhgef4_+_34801759.23-P1	GACCTCCGGGCTCCTATCGC	3	Arhgef4_-_34801788.23-P1	GAGGAGCCCGGAGGTTGGCC	4	Arhgef4_+_34801759.23-P1|Arhgef4_-_34801788.23-P1
Pate4	P1P2	Pate4_+_35611778.23-P1P2	GCCTTTCTCTGTTTTGTGGA	3	Pate4_+_35611968.23-P1P2	GATCATACATTTGGTTTATC	4	Pate4_+_35611778.23-P1P2|Pate4_+_35611968.23-P1P2
Atp6v0c	P1P2	Atp6v0c_-_24169447.23-P1P2	GGCACCGCAAAGCAAGATGG	3	Atp6v0c_+_24169601.23-P1P2	GCGCGGGCCAGCGAAGACCC	4	Atp6v0c_-_24169447.23-P1P2|Atp6v0c_+_24169601.23-P1P2
Arhgef5	P1P2	Arhgef5_-_43265697.23-P1P2	GcgcggcgggcgcccggACC	3	Arhgef5_-_43265892.23-P1P2	GCGCAGACTCCGGAAATGGG	4	Arhgef5_-_43265697.23-P1P2|Arhgef5_-_43265892.23-P1P2
Bzrap1	P1	Bzrap1_+_87760570.23-P1	GCGGAGCTCCCCAAATGAGA	3	Bzrap1_+_87760595.23-P1	GGGACTGCAAGGGTCCCTCG	4	Bzrap1_+_87760570.23-P1|Bzrap1_+_87760595.23-P1
Kmt2d	P1P2	Kmt2d_+_98871148.23-P1P2	GAAGGGTGACCACTCCGACC	3	Kmt2d_-_98871118.23-P1P2	GGCACAGCCGCCCCCCACTC	4	Kmt2d_+_98871148.23-P1P2|Kmt2d_-_98871118.23-P1P2
Srsf7	P1P2	Srsf7_+_80207151.23-P1P2	GTAAGCGGCCAGGGCCCCAG	3	Srsf7_-_80207259.23-P1P2	GGCTCACAGCGCGAGTAGCA	4	Srsf7_+_80207151.23-P1P2|Srsf7_-_80207259.23-P1P2
Cd3e	P1P2	Cd3e_-_45009539.23-P1P2	GTAGTAGGATGAAGGAGAGT	3	Cd3e_-_45009554.23-P1P2	GGAGTGGGGGGCACTTCACA	4	Cd3e_-_45009539.23-P1P2|Cd3e_-_45009554.23-P1P2
Fmo3	P1P2	Fmo3_-_162984521.23-P1P2	GTTAAACCCCTAGTCTTCTG	3	Fmo3_+_162984396.23-P1P2	GGAATGGGAAAGCAACATAG	4	Fmo3_-_162984521.23-P1P2|Fmo3_+_162984396.23-P1P2
Zbtb44	P1P2	Zbtb44_-_31030450.23-P1P2	GGTGAAACGAGCGGCTACGG	3	Zbtb44_+_31030636.23-P1P2	GCGCCCGTGGGCCTGAGGGG	4	Zbtb44_-_31030450.23-P1P2|Zbtb44_+_31030636.23-P1P2
Cftr	P1P2	Cftr_-_18170590.23-P1P2	GgTGGAGAGCAGCGACTGTG	3	Cftr_-_18170621.23-P1P2	GGCAGCGCTGGCTTTAACCT	4	Cftr_-_18170590.23-P1P2|Cftr_-_18170621.23-P1P2
Cts7	P1P2	Cts7_-_61357974.23-P1P2	GACAAACCTGGATCCAGGTG	3	Cts7_+_61357781.23-P1P2	GATGCAGAGGAAATAATAGG	4	Cts7_-_61357974.23-P1P2|Cts7_+_61357781.23-P1P2
Trp53rk	P1	Trp53rk_-_166793830.23-P1	GGGCATGGCTGGTGTGTCCT	3	Trp53rk_+_166794250.23-P1	GGGCAAGGCAACTCACAGAA	4	Trp53rk_-_166793830.23-P1|Trp53rk_+_166794250.23-P1
Wdr86	P1P2	Wdr86_-_24730628.23-P1P2	GCTGCGCAGAGGAGCCCACC	3	Wdr86_-_24730659.23-P1P2	GGGTAGAAGAACCCGAGAAG	4	Wdr86_-_24730628.23-P1P2|Wdr86_-_24730659.23-P1P2
Akirin1	P1P2	Akirin1_+_123750256.23-P1P2	GCGGGTGCCGGAGGCGCCAT	3	Akirin1_+_123749767.23-P1P2	GCCGGGGACGAGAGACATCC	4	Akirin1_+_123750256.23-P1P2|Akirin1_+_123749767.23-P1P2
Tnk2	P1P2	Tnk2_-_32643881.23-P1P2	GCGCGCGGGCTCTGAGAACC	3	Tnk2_+_32643937.23-P1P2	Gcgccgcccacactcgacct	4	Tnk2_-_32643881.23-P1P2|Tnk2_+_32643937.23-P1P2
Olfr46	ENSMUST00000072655.2	Olfr46_+_140610564.23-ENSMUST00000072655.2	GTAATGCAGGGGCAAACAGA	3	Olfr46_+_140610639.23-ENSMUST00000072655.2	GGATGCATTTAGTGCGCAGA	4	Olfr46_+_140610564.23-ENSMUST00000072655.2|Olfr46_+_140610639.23-ENSMUST00000072655.2
Plxna3	P1P2	Plxna3_+_74329322.23-P1P2	GAGCCTGGTCTGGAGAGGTA	3	Plxna3_-_74329134.23-P1P2	GCTGCGGGGCCAAGCGAGGG	4	Plxna3_+_74329322.23-P1P2|Plxna3_-_74329134.23-P1P2
Ssr1	P1P2	Ssr1_-_37994130.23-P1P2	GGGTCCGCTAGGGCTCTCGG	3	Ssr1_+_37994101.23-P1P2	GAGCCCTAGCGGACCCGCAC	4	Ssr1_-_37994130.23-P1P2|Ssr1_+_37994101.23-P1P2
4933402J07Rik	P1P2	4933402J07Rik_-_87564142.23-P1P2	GAGTGGCTGGAGCGGAGGCA	3	4933402J07Rik_+_87563880.23-P1P2	GGACAGAGGCAGGAAACAAG	4	4933402J07Rik_-_87564142.23-P1P2|4933402J07Rik_+_87563880.23-P1P2
Ckap4	P1P2	Ckap4_-_84533937.23-P1P2	GACGCTGGCTCCGGCTCCCA	3	Ckap4_-_84533949.23-P1P2	GGCTCCCACGGGGACTGCGC	4	Ckap4_-_84533937.23-P1P2|Ckap4_-_84533949.23-P1P2
Spata31d1b	ENSMUST00000165133.1	Spata31d1b_-_59712570.23-ENSMUST00000165133.1	GGTTCTGTCCTCTGGCTGTG	3	Spata31d1b_-_59712747.23-ENSMUST00000165133.1	Gggaaaggggatgggaagaa	4	Spata31d1b_-_59712570.23-ENSMUST00000165133.1|Spata31d1b_-_59712747.23-ENSMUST00000165133.1
Rnf25	P1P2	Rnf25_+_74601372.23-P1P2	GTCCGGTTCCGGCCAAGAGC	3	Rnf25_+_74601167.23-P1P2	GCGAGCTACTGGACCGGGAA	4	Rnf25_+_74601372.23-P1P2|Rnf25_+_74601167.23-P1P2
Vps9d1	P1P2	Vps9d1_-_123254052.23-P1P2	GGTTTCATGGCGCTCTGCAG	3	Vps9d1_-_123254072.23-P1P2	GGGCTTcgccccgccgtccc	4	Vps9d1_-_123254052.23-P1P2|Vps9d1_-_123254072.23-P1P2
Ifrd1	P1	Ifrd1_+_40223126.23-P1	GTCCGCTCGCAGCTCTTCAC	3	Ifrd1_+_40222935.23-P1	GGATGCCGAAGAACAAGAAG	4	Ifrd1_+_40223126.23-P1|Ifrd1_+_40222935.23-P1
Wnt3	P1P2	Wnt3_+_103774274.23-P1P2	GGTAGCAGCCCGAGCAGGTG	3	Wnt3_+_103774251.23-P1P2	GTCCATTAGAAGCAGCGCCG	4	Wnt3_+_103774274.23-P1P2|Wnt3_+_103774251.23-P1P2
Prdx6b	P1P2	Prdx6b_+_80292978.23-P1P2	GAGTTCTGTGGTACACACAG	3	Prdx6b_-_80292708.23-P1P2	Gtaagaagacaagccaaaaa	4	Prdx6b_+_80292978.23-P1P2|Prdx6b_-_80292708.23-P1P2
Derl1	P1P2	Derl1_-_57892425.23-P1P2	GAGGCGGAGACCGACGGACG	3	Derl1_+_57892300.23-P1P2	GGCGCAGCCGGTCACCTGAC	4	Derl1_-_57892425.23-P1P2|Derl1_+_57892300.23-P1P2
Sec62	P1P2	Sec62_-_30793361.23-P1P2	GGGCCAACATGGCGGAACGC	3	Sec62_-_30793396.23-P1P2	GGGATCCAGGTAGCTCGGCG	4	Sec62_-_30793361.23-P1P2|Sec62_-_30793396.23-P1P2
Tll2	P1P2	Tll2_-_41206649.23-P1P2	GGTGGTCGCAAGGGGCATAG	3	Tll2_-_41206786.23-P1P2	GGTACCAAGCAAGCCCAGTA	4	Tll2_-_41206649.23-P1P2|Tll2_-_41206786.23-P1P2
Tnnt3	P1P2	Tnnt3_-_142498908.23-P1P2	GACTCAACTACAGGTGTGTA	3	Tnnt3_-_142498948.23-P1P2	GGGAGTGGGCAACTGTGTCT	4	Tnnt3_-_142498908.23-P1P2|Tnnt3_-_142498948.23-P1P2
Cox8a	P1P2	Cox8a_-_7217550.23-P1P2	GACGGACGAGGACCAGTCCA	3	Cox8a_-_7217521.23-P1P2	GCAGGACAGACATGACGGCG	4	Cox8a_-_7217550.23-P1P2|Cox8a_-_7217521.23-P1P2
Trappc4	P1P2	Trappc4_+_44407244.23-P1P2	GCGGCGGCCTGATTTACCAG	3	Trappc4_+_44407263.23-P1P2	GTGTACGTGGTGAACAAAGC	4	Trappc4_+_44407244.23-P1P2|Trappc4_+_44407263.23-P1P2
Podnl1	P1	Podnl1_-_84127597.23-P1	GGCCCACTGTGCTCCCACCC	3	Podnl1_+_84127621.23-P1	GAAGTTCTCTAGCTGGTTGA	4	Podnl1_-_84127597.23-P1|Podnl1_+_84127621.23-P1
Agtr1b	P1P2	Agtr1b_+_20367022.23-P1P2	GACCGTGCACGGGTGAGTCG	3	Agtr1b_-_20366941.23-P1P2	GTGGTGAACTGTTCTAGGGA	4	Agtr1b_+_20367022.23-P1P2|Agtr1b_-_20366941.23-P1P2
Glb1l	P2	Glb1l_-_75210704.23-P2	GAGGGCCAAGTGGGAACCCT	3	Glb1l_+_75210780.23-P2	GGTATCCTAGCAACAAGAGG	4	Glb1l_-_75210704.23-P2|Glb1l_+_75210780.23-P2
Olfr1390	ENSMUST00000062719.1	Olfr1390_-_49340537.23-ENSMUST00000062719.1	GGGTGCACACGAAAGGCTAT	3	Olfr1390_+_49340943.23-ENSMUST00000062719.1	GTAGTGAGAGGCAGAGAACG	4	Olfr1390_-_49340537.23-ENSMUST00000062719.1|Olfr1390_+_49340943.23-ENSMUST00000062719.1
Catsperg1	P1P2	Catsperg1_+_29211504.23-P1P2	GCCTGAGGGGCACAGTGGTA	3	Catsperg1_+_29211539.23-P1P2	GTGGGCGGGGAACCTTTTGA	4	Catsperg1_+_29211504.23-P1P2|Catsperg1_+_29211539.23-P1P2
Sowahb	P1P2	Sowahb_+_93044658.23-P1P2	GCAGTGCGCCAGGACCCCGA	3	Sowahb_-_93044963.23-P1P2	GGTGTCACCTGCGCCCAGGG	4	Sowahb_+_93044658.23-P1P2|Sowahb_-_93044963.23-P1P2
Ly75	P1P2	Ly75_-_60383271.23-P1P2	GCTGCCCGCACCGGCTTCAG	3	Ly75_+_60383253.23-P1P2	GTCACCGCTGAAGCCGGTGC	4	Ly75_-_60383271.23-P1P2|Ly75_+_60383253.23-P1P2
Csn1s2a	P1P2	Csn1s2a_+_87774594.23-P1P2	GCATTACCTTGCTCCCCAAA	3	Csn1s2a_+_87774557.23-P1P2	GGGTAGATGATGATCTGCAG	4	Csn1s2a_+_87774594.23-P1P2|Csn1s2a_+_87774557.23-P1P2
Prune	P1P2	Prune_+_95281518.23-P1P2	GCTGGGAAGGACGAAGGTGT	3	Prune_+_95281510.23-P1P2	GGACGAAGGTGTGGGATCTG	4	Prune_+_95281518.23-P1P2|Prune_+_95281510.23-P1P2
Nmrk2	P1P2	Nmrk2_-_81201990.23-P1P2	GGTTTCATCTTGGGGACTGG	3	Nmrk2_-_81201944.23-P1P2	GGGTCACACTCCAGGCCCTA	4	Nmrk2_-_81201990.23-P1P2|Nmrk2_-_81201944.23-P1P2
Mrpl3	P1P2	Mrpl3_-_105053294.23-P1P2	GCCTCCGCGGAGGGCATTGG	3	Mrpl3_-_105053302.23-P1P2	GGAGGGCATTGGCGGACAAA	4	Mrpl3_-_105053294.23-P1P2|Mrpl3_-_105053302.23-P1P2
Aknad1	P1P2	Aknad1_+_108744454.23-P1P2	GTGTAGCCCTTACAGGTGGT	3	Aknad1_+_108744458.23-P1P2	GTTGCTGTAGCCCTTACAGG	4	Aknad1_+_108744454.23-P1P2|Aknad1_+_108744458.23-P1P2
Car6	P2	Car6_+_150198191.23-P2	GCCCATCGACGTGAAGACGG	3	Car6_+_150198128.23-P2	GAACTATGAGAAGGAGAACC	4	Car6_+_150198191.23-P2|Car6_+_150198128.23-P2
Trnp1	P1P2	Trnp1_+_133498409.23-P1P2	GCGGCCCAGGGGCCCAGGAA	3	Trnp1_-_133498306.23-P1P2	GCGGCCGCCTCgggtaaggg	4	Trnp1_+_133498409.23-P1P2|Trnp1_-_133498306.23-P1P2
Rab37	P1P2	Rab37_-_115154235.23-P1P2	GGAGCTGCTACCGCTGGGGA	3	Rab37_+_115154223.23-P1P2	GGGGGCCTCGCCATCCCCAG	4	Rab37_-_115154235.23-P1P2|Rab37_+_115154223.23-P1P2
Kif18a	P1P2	Kif18a_-_109281063.23-P1P2	GCTACCGAGTGTGCATGACA	3	Kif18a_-_109280905.23-P1P2	GTTCTTGTAGGTGAGTGAGG	4	Kif18a_-_109281063.23-P1P2|Kif18a_-_109280905.23-P1P2
Zfp184	P1P2	Zfp184_+_21945145.23-P1P2	GTCCTGGATCCAGATGACCT	3	Zfp184_-_21945173.23-P1P2	GCATCTGGATCCAGGATCCT	4	Zfp184_+_21945145.23-P1P2|Zfp184_-_21945173.23-P1P2
Coq2	P1P2	Coq2_-_100673994.23-P1P2	GGCCCGCCCCACTCACCTAT	3	Coq2_-_100674242.23-P1P2	GGCGCCTCCCCAGCGCAGCA	4	Coq2_-_100673994.23-P1P2|Coq2_-_100674242.23-P1P2
Gm11744	P1	Gm11744_+_116657175.23-P1	GGAAGAAGGCCACAGGGCCG	3	Gm11744_-_116657172.23-P1	GAGAGGTAGGCTGGCCATTG	4	Gm11744_+_116657175.23-P1|Gm11744_-_116657172.23-P1
Tox3	P1P2	Tox3_-_90348304.23-P1P2	GCGCGGCGAAGCTGGGAcgg	3	Tox3_-_90348266.23-P1P2	Ggcagcgcgtgggcccggga	4	Tox3_-_90348304.23-P1P2|Tox3_-_90348266.23-P1P2
Usp43	P1P2	Usp43_+_67922123.23-P1P2	GGGCGCCCGGCGCCTCCGGG	3	Usp43_-_67921985.23-P1P2	GAAGCAGGCGGCGAAGGGAA	4	Usp43_+_67922123.23-P1P2|Usp43_-_67921985.23-P1P2
Exosc8	P1P2	Exosc8_+_54734999.23-P1P2	GGCGGCTGGGTTCAAGTGAG	3	Exosc8_+_54735020.23-P1P2	GGCAGAGCGGGCCGGAAAAA	4	Exosc8_+_54734999.23-P1P2|Exosc8_+_54735020.23-P1P2
St8sia4	P1P2	St8sia4_+_95667481.23-P1P2	GAGGCGGCGCAGAGCGACCC	3	St8sia4_+_95667503.23-P1P2	GAAAAGAAACCTGAGCCCCA	4	St8sia4_+_95667481.23-P1P2|St8sia4_+_95667503.23-P1P2
Pex10	P1P2	Pex10_+_155067299.23-P1P2	GGGGCGTCTGGAGAATAAAT	3	Pex10_-_155067129.23-P1P2	GAGAAGGACGAGTACTACCT	4	Pex10_+_155067299.23-P1P2|Pex10_-_155067129.23-P1P2
Fermt1	P1P2	Fermt1_+_132945521.23-P1P2	GAGCCTGCGCCGCCAAGCTG	3	Fermt1_+_132945508.23-P1P2	GAAGCTGTGGCCCCGGGACT	4	Fermt1_+_132945521.23-P1P2|Fermt1_+_132945508.23-P1P2
Crisp2	P1P2	Crisp2_-_40794045.23-P1P2	GTACGCTGGTTCAACAGCAC	3	Crisp2_+_40794011.23-P1P2	GACCAGCGTAAATATTAGGG	4	Crisp2_-_40794045.23-P1P2|Crisp2_+_40794011.23-P1P2
Chst11	P1P2	Chst11_-_82985614.23-P1P2	GGGAGCATCGAGCAGAGGCG	3	Chst11_-_82985617.23-P1P2	GGCATCGAGCAGAGGCGAGG	4	Chst11_-_82985614.23-P1P2|Chst11_-_82985617.23-P1P2
Csrnp2	P1P2	Csrnp2_-_100495001.23-P1P2	GCTGCCAGGCAAGGACGAGG	3	Csrnp2_-_100495246.23-P1P2	GGCGAAGACCAGAACCGTCC	4	Csrnp2_-_100495001.23-P1P2|Csrnp2_-_100495246.23-P1P2
Gstz1	P1P2	Gstz1_+_87147763.23-P1P2	GAGATGACTGAGGCCTAGCG	3	Gstz1_-_87147731.23-P1P2	GGCGGGGCCAGCCCGAAGGA	4	Gstz1_+_87147763.23-P1P2|Gstz1_-_87147731.23-P1P2
Stk32c	P1	Stk32c_-_139188445.23-P1	GAGAGCAGAGCGCTAAGGGC	3	Stk32c_-_139188440.23-P1	GCTGGGAGAGCAGAGCGCTA	4	Stk32c_-_139188445.23-P1|Stk32c_-_139188440.23-P1
Bpifa2	P1P2	Bpifa2_-_154008358.23-P1P2	GTTCCCATCTGAGAGTCCAC	3	Bpifa2_+_154008635.23-P1P2	GCTCCCCAGAGAGCACATCT	4	Bpifa2_-_154008358.23-P1P2|Bpifa2_+_154008635.23-P1P2
Arpc5l	P1P2	Arpc5l_+_39008130.23-P1P2	GTCCCGGCTCCCCTCCGCAC	3	Arpc5l_+_39008314.23-P1P2	GGAGCCCGTCTACCTCGCAG	4	Arpc5l_+_39008130.23-P1P2|Arpc5l_+_39008314.23-P1P2
Lsamp	P1P2	Lsamp_+_41533412.23-P1P2	GGCAGTCTCAGTAGGACCAG	3	Lsamp_+_41533094.23-P1P2	GAAATGCTTTAATGATGAGG	4	Lsamp_+_41533412.23-P1P2|Lsamp_+_41533094.23-P1P2
E2f2	P1P2	E2f2_+_136172750.23-P1P2	GCGGCGCCCCCTACCCACTC	3	E2f2_+_136172745.23-P1P2	GCCCCCTACCCACTCGGGTC	4	E2f2_+_136172750.23-P1P2|E2f2_+_136172745.23-P1P2
Vmn1r194	ENSMUST00000091737.1	Vmn1r194_-_22244591.23-ENSMUST00000091737.1	GGGCCAAACCACAGACTTCG	3	Vmn1r194_+_22244577.23-ENSMUST00000091737.1	GGAACTTGCCTCGAAGTCTG	4	Vmn1r194_-_22244591.23-ENSMUST00000091737.1|Vmn1r194_+_22244577.23-ENSMUST00000091737.1
Man1a	P1P2	Man1a_-_54075650.23-P1P2	GGCTCTGAGGCCCCGGGACA	3	Man1a_-_54075531.23-P1P2	GGCAAGGGCGGCGCACCTCT	4	Man1a_-_54075650.23-P1P2|Man1a_-_54075531.23-P1P2
Glycam1	P1P2	Glycam1_-_103564941.23-P1P2	GCATGGCCTGTAGGAGACTA	3	Glycam1_+_103564760.23-P1P2	GCTAGACTGAACCCATAACA	4	Glycam1_-_103564941.23-P1P2|Glycam1_+_103564760.23-P1P2
Ccnyl1	P1P2	Ccnyl1_-_64690805.23-P1P2	GCTAGCGGCCTTCAGTTCGG	3	Ccnyl1_-_64690802.23-P1P2	GCGGCTAGCGGCCTTCAGTT	4	Ccnyl1_-_64690805.23-P1P2|Ccnyl1_-_64690802.23-P1P2
A630001G21Rik	P1P2	A630001G21Rik_-_85736534.23-P1P2	GTCACGGCGGGCGTCAATTG	3	A630001G21Rik_-_85736521.23-P1P2	GCCTTCAGCCTTCCTCACGG	4	A630001G21Rik_-_85736534.23-P1P2|A630001G21Rik_-_85736521.23-P1P2
Prss38	P1P2	Prss38_-_59375613.23-P1P2	GTATCCCAGGACGCCCAAGC	3	Prss38_-_59375454.23-P1P2	GAGGGCCGAGGTTCCACCCA	4	Prss38_-_59375613.23-P1P2|Prss38_-_59375454.23-P1P2
4933430I17Rik	P1P2	4933430I17Rik_+_62525158.23-P1P2	GCTACACTGGGGACTTGTGG	3	4933430I17Rik_+_62525161.23-P1P2	GGGGCTACACTGGGGACTTG	4	4933430I17Rik_+_62525158.23-P1P2|4933430I17Rik_+_62525161.23-P1P2
1700025G04Rik	P1P2	1700025G04Rik_+_152090235.23-P1P2	GCTCCCTGCCCACTCCCGGG	3	1700025G04Rik_-_152090234.23-P1P2	GCGGCGGCCGCGCCACGGAA	4	1700025G04Rik_+_152090235.23-P1P2|1700025G04Rik_-_152090234.23-P1P2
Toe1	P1P2	Toe1_-_116807488.23-P1P2	GCGTCAGAGGGCGTTGGAAC	3	Toe1_-_116807475.23-P1P2	GGGGAGCCGCTCACCGTCAG	4	Toe1_-_116807488.23-P1P2|Toe1_-_116807475.23-P1P2
Rara	P2	Rara_+_98960512.23-P2	GGGGTGGGGGAACCCCTGTA	3	Rara_+_98960674.23-P2	GCCGGTGGCCCAAGAACTCG	4	Rara_+_98960512.23-P2|Rara_+_98960674.23-P2
Pfkm	P1	Pfkm_-_98108643.23-P1	GGCCTTGGGTGGAGAGCGAG	3	Pfkm_+_98108793.23-P1	GTGCTGGGCGGTTAACCGAG	4	Pfkm_-_98108643.23-P1|Pfkm_+_98108793.23-P1
Tcea1	P1P2	Tcea1_-_4858157.23-P1P2	GGCTGGGCTGAGAGAATGTA	3	Tcea1_-_4857773.23-P1P2	GTTGACTGGCACGGCCTAGG	4	Tcea1_-_4858157.23-P1P2|Tcea1_-_4857773.23-P1P2
Rspo1	P1P2	Rspo1_-_124986545.23-P1P2	GcAGCACCAATGCACCGGGC	3	Rspo1_-_124986723.23-P1P2	GGGGTCCTGGGTCCACGTCC	4	Rspo1_-_124986545.23-P1P2|Rspo1_-_124986723.23-P1P2
Hps5	P1P2	Hps5_+_46795627.23-P1P2	GAAGCGATCGCTGGTCTCTG	3	Hps5_+_46796054.23-P1P2	GGAGCACGTGACCACCACCG	4	Hps5_+_46795627.23-P1P2|Hps5_+_46796054.23-P1P2
Rhox3c	ENSMUST00000115188.2	Rhox3c_+_37458817.23-ENSMUST00000115188.2	GTGTTGTCTCATGTCACATA	3	Rhox3c_+_37458849.23-ENSMUST00000115188.2	GAAGCTAAACCTAAGACCTA	4	Rhox3c_+_37458817.23-ENSMUST00000115188.2|Rhox3c_+_37458849.23-ENSMUST00000115188.2
Cacna1h	P1P2	Cacna1h_-_25433711.23-P1P2	Ggaccgcaggcacgggccgg	3	Cacna1h_-_25433704.23-P1P2	Ggggcgcggaccgcaggcac	4	Cacna1h_-_25433711.23-P1P2|Cacna1h_-_25433704.23-P1P2
Prpf4b	P1P2	Prpf4b_+_34875591.23-P1P2	GGGCGAACCGTGGACGCCAG	3	Prpf4b_+_34875616.23-P1P2	GTCCTCCGCGATGCTGGCGG	4	Prpf4b_+_34875591.23-P1P2|Prpf4b_+_34875616.23-P1P2
Srsf11	P2	Srsf11_+_158031717.23-P2	GCTGCGCTGCGCGAGGTCCG	3	Srsf11_+_158031703.23-P2	GGTCCGCGGCCGTTTGTGTG	4	Srsf11_+_158031717.23-P2|Srsf11_+_158031703.23-P2
Krtap13-1	P1P2	Krtap13-1_+_88729044.23-P1P2	GGTTCTGCTGACAGCCACTG	3	Krtap13-1_+_88728951.23-P1P2	GAGAGCCACAAGAGGAGTGA	4	Krtap13-1_+_88729044.23-P1P2|Krtap13-1_+_88728951.23-P1P2
S100a16	P1	S100a16_-_90537527.23-P1	GGAGGTGCCTGCCAGAAACA	3	S100a16_-_90537591.23-P1	GTAGGGTATGAGCAGTCCGG	4	S100a16_-_90537527.23-P1|S100a16_-_90537591.23-P1
Atic	P1P2	Atic_+_71557220.23-P1P2	GGCGGAGTCAAGGGACGGAC	3	Atic_+_71557261.23-P1P2	GGGGCCTCACCAAGCTGAGA	4	Atic_+_71557220.23-P1P2|Atic_+_71557261.23-P1P2
Casc5	P1P2	Casc5_-_119047143.23-P1P2	GAGCATGCGCATCACTAGGG	3	Casc5_-_119047233.23-P1P2	GAAGTCAAGCAGGTGGTCGG	4	Casc5_-_119047143.23-P1P2|Casc5_-_119047233.23-P1P2
Tnf	P1P2	Tnf_+_35201985.23-P1P2	GAGCAGAAGCTCCCTCAGCG	3	Tnf_+_35201772.23-P1P2	GCACTCCCCCAAAAGATGGG	4	Tnf_+_35201985.23-P1P2|Tnf_+_35201772.23-P1P2
Zfp687	P1P2	Zfp687_-_95015175.23-P1P2	GTGGTCCTCGAAGAAGAAGG	3	Zfp687_-_95015227.23-P1P2	GGGGCGGCGGCACGGAGAAG	4	Zfp687_-_95015175.23-P1P2|Zfp687_-_95015227.23-P1P2
BC049352	P2	BC049352_-_45182060.23-P2	GTCCTTGGAAATGAGGTGAC	3	BC049352_+_45182064.23-P2	GCCCAGCACTGTCTAGAAAA	4	BC049352_-_45182060.23-P2|BC049352_+_45182064.23-P2
Plac8l1	P1P2	Plac8l1_+_42196679.23-P1P2	GTTGAATCTGAGTTTCAAGT	3	Plac8l1_+_42196646.23-P1P2	GTCCAAGGGAAAGGATAGCC	4	Plac8l1_+_42196679.23-P1P2|Plac8l1_+_42196646.23-P1P2
Cd83	P1P2	Cd83_+_43785233.23-P1P2	GCGTACCGCAGCCTAGAAAC	3	Cd83_+_43785186.23-P1P2	GGAGCGCTGCGACACTGTCC	4	Cd83_+_43785233.23-P1P2|Cd83_+_43785186.23-P1P2
Cbfa2t2	P1P2	Cbfa2t2_-_154436449.23-P1P2	Ggcgtgccggggctgtctgg	3	Cbfa2t2_+_154436900.23-P1P2	GCTCTCGCGGACAGTCCATA	4	Cbfa2t2_-_154436449.23-P1P2|Cbfa2t2_+_154436900.23-P1P2
Sostdc1	P1P2	Sostdc1_+_36314281.23-P1P2	GGAGGAAGCATGATGAGTGG	3	Sostdc1_+_36314271.23-P1P2	GGATGAGTGGAGGATTTGCT	4	Sostdc1_+_36314281.23-P1P2|Sostdc1_+_36314271.23-P1P2
Coa5	P1P2	Coa5_+_37430004.23-P1P2	GGGCCGTGCGGGGTGACCGA	3	Coa5_+_37429979.23-P1P2	GTGATCCAGTGTGGTGAGGG	4	Coa5_+_37430004.23-P1P2|Coa5_+_37429979.23-P1P2
Cxcl15	P1P2	Cxcl15_+_90794558.23-P1P2	GGAGCAGCCATGTCCGTCTG	3	Cxcl15_-_90794619.23-P1P2	GTGCTGGCTGTCCTTAACCT	4	Cxcl15_+_90794558.23-P1P2|Cxcl15_-_90794619.23-P1P2
Tdpoz2	ENSMUST00000178358.1	Tdpoz2_+_93652631.23-ENSMUST00000178358.1	GACATGGAAGCCAAGATCTG	3	Tdpoz2_-_93652628.23-ENSMUST00000178358.1	GTCCTTAACACTGATCTGTG	4	Tdpoz2_+_93652631.23-ENSMUST00000178358.1|Tdpoz2_-_93652628.23-ENSMUST00000178358.1
Tmie	P1P2	Tmie_-_110880075.23-P1P2	GGTCTGGCGGGAGAGGCTCT	3	Tmie_+_110880035.23-P1P2	GGACTGCGAAAGCTCCCCTT	4	Tmie_-_110880075.23-P1P2|Tmie_+_110880035.23-P1P2
Spink8	P1P2	Spink8_+_109816678.23-P1P2	GGGAAGACACTCCTGACTGA	3	Spink8_+_109816745.23-P1P2	GCTTCATGGTGACAGACCTG	4	Spink8_+_109816678.23-P1P2|Spink8_+_109816745.23-P1P2
Arhgef18	P1P2	Arhgef18_+_3393081.23-P1P2	GCCTCCGCGGGGTCCCTCAC	3	Arhgef18_-_3393269.23-P1P2	GCTCCAAGTGGAGAATGTGG	4	Arhgef18_+_3393081.23-P1P2|Arhgef18_-_3393269.23-P1P2
Oxld1	P1P2	Oxld1_+_120458033.23-P1P2	GTCCCCAAGCTCCTTGGCTC	3	Oxld1_+_120457786.23-P1P2	GGGGCCCCAGACGAGTTAGT	4	Oxld1_+_120458033.23-P1P2|Oxld1_+_120457786.23-P1P2
Zfp568	P1P2	Zfp568_-_29983961.23-P1P2	GCTGTGCTCTGGGACATAAC	3	Zfp568_-_29983986.23-P1P2	GGCGCTGCCGCCCGAGTGGA	4	Zfp568_-_29983961.23-P1P2|Zfp568_-_29983986.23-P1P2
Nacc1	P1P2	Nacc1_+_84687853.23-P1P2	GCTTCCTCGGCGCTCGGCTG	3	Nacc1_-_84687881.23-P1P2	GCGAGCGCCGAGGAAGCGCA	4	Nacc1_+_84687853.23-P1P2|Nacc1_-_84687881.23-P1P2
AI987944	P1P2	AI987944_+_41393347.23-P1P2	GAGAGAAGGCGGGACCTTCC	3	AI987944_+_41393161.23-P1P2	GTGTGTAGCAGAAGTTGGTA	4	AI987944_+_41393347.23-P1P2|AI987944_+_41393161.23-P1P2
As3mt	P1P2	As3mt_-_46707516.23-P1P2	GAATCCTGGACAGGGAATCC	3	As3mt_+_46707667.23-P1P2	GATGGAGGGCGAGCAGGACA	4	As3mt_-_46707516.23-P1P2|As3mt_+_46707667.23-P1P2
Nceh1	P1P2	Nceh1_-_27183047.23-P1P2	GGTAGCATCGCACCGTACCG	3	Nceh1_+_27183094.23-P1P2	GAGCCAGCAGAGCGGCCAGT	4	Nceh1_-_27183047.23-P1P2|Nceh1_+_27183094.23-P1P2
Palld	ENSMUST00000121785.1,ENSMUST00000034057.7	Palld_-_61902656.23-ENSMUST00000121785.1,ENSMUST00000034057.7	GTCTCCTGGTGAGTGGAGGT	3	Palld_+_61902616.23-ENSMUST00000121785.1,ENSMUST00000034057.7	GAGAAAGAGGCAAAGCCCCT	4	Palld_-_61902656.23-ENSMUST00000121785.1,ENSMUST00000034057.7|Palld_+_61902616.23-ENSMUST00000121785.1,ENSMUST00000034057.7
Mroh5	ENSMUST00000110021.2	Mroh5_-_73819355.23-ENSMUST00000110021.2	GGGTCTCCTCCAAGACATCA	3	Mroh5_+_73819359.23-ENSMUST00000110021.2	GAGGTCTTGGTGGCAGTCAT	4	Mroh5_-_73819355.23-ENSMUST00000110021.2|Mroh5_+_73819359.23-ENSMUST00000110021.2
Ccdc18	P1P2	Ccdc18_+_108132876.23-P1P2	GAAGCCTCTGACTCTCGATG	3	Ccdc18_-_108132829.23-P1P2	GCCCGGGAGGCGGGTCCCAA	4	Ccdc18_+_108132876.23-P1P2|Ccdc18_-_108132829.23-P1P2
Tfdp2	P1	Tfdp2_-_96196321.23-P1	GGCCGCGGCCGTGTCGCTGA	3	Tfdp2_-_96196328.23-P1	GCCGTGTCGCTGAGGGCGGA	4	Tfdp2_-_96196321.23-P1|Tfdp2_-_96196328.23-P1
Zfp551	P1P2	Zfp551_-_12422450.23-P1P2	GTGTAGAGGAAGCAAGGACC	3	Zfp551_-_12422459.23-P1P2	GAGCAAGGACCAGGTCGCCG	4	Zfp551_-_12422450.23-P1P2|Zfp551_-_12422459.23-P1P2
Wdr95	P1P2	Wdr95_-_149529707.23-P1P2	GCACTAATAACACCAGGTAT	3	Wdr95_+_149529716.23-P1P2	GTTTAGCGGTGCCAATACCG	4	Wdr95_-_149529707.23-P1P2|Wdr95_+_149529716.23-P1P2
Tpbpb	P1P2	Tpbpb_-_60904756.23-P1P2	GATAAGTTCCCAATCTGCTC	3	Tpbpb_-_60904570.23-P1P2	GACTGGCACTCCCTGTGACC	4	Tpbpb_-_60904756.23-P1P2|Tpbpb_-_60904570.23-P1P2
Orm3	P1P2	Orm3_-_63356466.23-P1P2	GGGCATCCCCCTGTCTCCAA	3	Orm3_-_63356178.23-P1P2	GAGTTATCTCTTCCCAGCTC	4	Orm3_-_63356466.23-P1P2|Orm3_-_63356178.23-P1P2
1700003E16Rik	P1P2	1700003E16Rik_-_83156495.23-P1P2	GGGTTGCCGAGGAGACCGTT	3	1700003E16Rik_-_83156522.23-P1P2	GGCCACTGCAGCTACAACGA	4	1700003E16Rik_-_83156495.23-P1P2|1700003E16Rik_-_83156522.23-P1P2
Hist4h4	ENSMUST00000179285.1	Hist4h4_+_136804343.23-ENSMUST00000179285.1	GAAAAGGCGGCAAGGGTCTG	3	Hist4h4_+_136804359.23-ENSMUST00000179285.1	GATATGTCAGGACGAGGAAA	4	Hist4h4_+_136804343.23-ENSMUST00000179285.1|Hist4h4_+_136804359.23-ENSMUST00000179285.1
Ifna5	ENSMUST00000102804.1	Ifna5_-_88835723.23-ENSMUST00000102804.1	GGATTCCCACAGGAGAAGGT	3	Ifna5_-_88835914.23-ENSMUST00000102804.1	GATGCAACAGGTCGGGGTGC	4	Ifna5_-_88835723.23-ENSMUST00000102804.1|Ifna5_-_88835914.23-ENSMUST00000102804.1
Gm4787	ENSMUST00000062182.7	Gm4787_-_81379360.23-ENSMUST00000062182.7	GGGAGGGCCAAAGTCCAGGT	3	Gm4787_-_81379462.23-ENSMUST00000062182.7	GGAGAGCAGAGTGAGGCAAG	4	Gm4787_-_81379360.23-ENSMUST00000062182.7|Gm4787_-_81379462.23-ENSMUST00000062182.7
Thap4	P1P2	Thap4_-_93754606.23-P1P2	GCTGGCCCGACCCGCCCCGA	3	Thap4_+_93754554.23-P1P2	GGGCAAGGATCGGAGCCTGG	4	Thap4_-_93754606.23-P1P2|Thap4_+_93754554.23-P1P2
Cd163l1	P1P2	Cd163l1_-_140218343.23-P1P2	GCAGTGGTTATCAGTATGGG	3	Cd163l1_+_140218524.23-P1P2	GGCCTCAGCTGCAGCGATAA	4	Cd163l1_-_140218343.23-P1P2|Cd163l1_+_140218524.23-P1P2
Obfc1	P1P2	Obfc1_-_47536944.23-P1P2	GTCTGGGAAGAGCGGAGGAA	3	Obfc1_+_47537015.23-P1P2	GTCCTTCTCGCAACCGGAAC	4	Obfc1_-_47536944.23-P1P2|Obfc1_+_47537015.23-P1P2
Slc39a7	P1P2	Slc39a7_+_34031607.23-P1P2	GAGGGAGCTTCCGGATCTCG	3	Slc39a7_-_34031619.23-P1P2	GCTCGAGCTCCCGCGAGATC	4	Slc39a7_+_34031607.23-P1P2|Slc39a7_-_34031619.23-P1P2
Gabbr1	P2	Gabbr1_+_37050947.23-P2	GTGAGGCCGCGGGAGATGAG	3	Gabbr1_+_37050621.23-P2	GTGACCGACCGACAGAAGGG	4	Gabbr1_+_37050947.23-P2|Gabbr1_+_37050621.23-P2
Apbb2	P1P2	Apbb2_+_66618630.23-P1P2	GTGCAGCCCGCAGCTGATCC	3	Apbb2_-_66618373.23-P1P2	GGGCGAGCGGGACTCCGCAG	4	Apbb2_+_66618630.23-P1P2|Apbb2_-_66618373.23-P1P2
Nol12	P1P2	Nol12_-_78935420.23-P1P2	GCAGCCAAGCCTGAGACCAG	3	Nol12_+_78935308.23-P1P2	GACGACTGGGAGCCAGCTAT	4	Nol12_-_78935420.23-P1P2|Nol12_+_78935308.23-P1P2
Tmco5	P1P2	Tmco5_-_116878797.23-P1P2	GGTTTGTAGAGGAGGTTATA	3	Tmco5_-_116878760.23-P1P2	GTCAGAAAGCCAAAGCACAT	4	Tmco5_-_116878797.23-P1P2|Tmco5_-_116878760.23-P1P2
Gng12	P1P2	Gng12_+_66896522.23-P1P2	GTCCGGTCCCGGCGCTACCT	3	Gng12_+_66896560.23-P1P2	GACAGGCGGCCCCGAAGTAG	4	Gng12_+_66896522.23-P1P2|Gng12_+_66896560.23-P1P2
Slc24a5	P1P2	Slc24a5_-_125068212.23-P1P2	GATGGGGCCCAACTTGGACA	3	Slc24a5_+_125068197.23-P1P2	GGACCCTCCTTGTCCAAGTT	4	Slc24a5_-_125068212.23-P1P2|Slc24a5_+_125068197.23-P1P2
Col9a1	P1P2	Col9a1_-_24195363.23-P1P2	GCAGAGCCAGCCCAGAGGAT	3	Col9a1_+_24195286.23-P1P2	GAAGCGCATAAAGTAGCACC	4	Col9a1_-_24195363.23-P1P2|Col9a1_+_24195286.23-P1P2
Rora	P1P2	Rora_+_69289990.23-P1P2	GCCGCGGTGCGGAGAGCGCA	3	Rora_-_69289964.23-P1P2	GCGGGCGGCGGCGGCAAGAG	4	Rora_+_69289990.23-P1P2|Rora_-_69289964.23-P1P2
Cdc7	P1P2	Cdc7_+_106964642.23-P1P2	GCTCGACTGGAGCCGACCGA	3	Cdc7_-_106964378.23-P1P2	GCCTGGCGGCCCGGCTCAGT	4	Cdc7_+_106964642.23-P1P2|Cdc7_-_106964378.23-P1P2
Vdac2	P1P2	Vdac2_+_21831569.23-P1P2	GTGCAGCCACCGCGGCTGGA	3	Vdac2_-_21831585.23-P1P2	GCTTCGCCCTCCAGCCGCGG	4	Vdac2_+_21831569.23-P1P2|Vdac2_-_21831585.23-P1P2
Smap2	P1P2	Smap2_+_121017146.23-P1P2	GGGGCAGACCCTCAACACTC	3	Smap2_+_121017190.23-P1P2	GGAGCTGGTCGCAGCTGCCA	4	Smap2_+_121017146.23-P1P2|Smap2_+_121017190.23-P1P2
Fgf10	P1P2	Fgf10_-_118714710.23-P1P2	GTTTACAAGCGGCTTTCCAA	3	Fgf10_+_118714704.23-P1P2	GTCTCCACCTCCAAGTCCCT	4	Fgf10_-_118714710.23-P1P2|Fgf10_+_118714704.23-P1P2
Tifab	P1P2	Tifab_-_56178605.23-P1P2	GGTGTGATCAGGCAGGACCT	3	Tifab_+_56178489.23-P1P2	GAGGCTGGTGAGGCTAGGAG	4	Tifab_-_56178605.23-P1P2|Tifab_+_56178489.23-P1P2
Scn4a	P1P2	Scn4a_+_106349582.23-P1P2	GCCTGTGCATCAGCACACTC	3	Scn4a_-_106349421.23-P1P2	GGGGCTCAGGGGCCAGAGGG	4	Scn4a_+_106349582.23-P1P2|Scn4a_-_106349421.23-P1P2
Tfdp1	P1P2	Tfdp1_+_13339031.23-P1P2	GTCGAGGCCGACTCCAGCTG	3	Tfdp1_-_13338806.23-P1P2	GCGGCCCGACGCTCGGCCCA	4	Tfdp1_+_13339031.23-P1P2|Tfdp1_-_13338806.23-P1P2
AI593442	P1P2	AI593442_+_52679480.23-P1P2	GCGGCCTGCGCAGGCACCTC	3	AI593442_+_52679563.23-P1P2	GCAGGTAAGAGACAGTGGTC	4	AI593442_+_52679480.23-P1P2|AI593442_+_52679563.23-P1P2
Ptov1	P1P2	Ptov1_-_44869604.23-P1P2	GGCGCGGCTTCGGGGAGAAG	3	Ptov1_-_44869355.23-P1P2	GAGGCCGTGGGACTCACCAT	4	Ptov1_-_44869604.23-P1P2|Ptov1_-_44869355.23-P1P2
Sspn	P1P2	Sspn_-_145934178.23-P1P2	GGCACCACCGAGGGAACATG	3	Sspn_-_145934157.23-P1P2	GAGCAGCAAGGCCCAGGCGC	4	Sspn_-_145934178.23-P1P2|Sspn_-_145934157.23-P1P2
Olfr1351	ENSMUST00000080730.1	Olfr1351_-_79017333.23-ENSMUST00000080730.1	GGTGTCAAACACATGGAACC	3	Olfr1351_+_79017468.23-ENSMUST00000080730.1	GAGGTGGGAGTCGGCAGTGA	4	Olfr1351_-_79017333.23-ENSMUST00000080730.1|Olfr1351_+_79017468.23-ENSMUST00000080730.1
Kdm5d	P1P2	Kdm5d_-_897907.23-P1P2	GTGGGTGCCACGCAGTGAGT	3	Kdm5d_+_897992.23-P1P2	GACACAGGGCACTCAGGCGG	4	Kdm5d_-_897907.23-P1P2|Kdm5d_+_897992.23-P1P2
Rep15	P1P2	Rep15_-_147032528.23-P1P2	GTATATGGCTAGCCACATCA	3	Rep15_-_147032537.23-P1P2	GAGCCACATCAAGGAAGCTG	4	Rep15_-_147032528.23-P1P2|Rep15_-_147032537.23-P1P2
Olfr884	ENSMUST00000181088.1	Olfr884_+_38046593.23-ENSMUST00000181088.1	GTCTGAGGAACCATGAGTTC	3	Olfr884_+_38046648.23-ENSMUST00000181088.1	GGAGAGGGGGAAATCAATTT	4	Olfr884_+_38046593.23-ENSMUST00000181088.1|Olfr884_+_38046648.23-ENSMUST00000181088.1
E030019B06Rik	P1P2	E030019B06Rik_-_139616360.23-P1P2	GATGCATCAGTACCACAAGG	3	E030019B06Rik_-_139616323.23-P1P2	GACGGCCACTGCTCTCCCCC	4	E030019B06Rik_-_139616360.23-P1P2|E030019B06Rik_-_139616323.23-P1P2
Hsp90aa1	P1P2	Hsp90aa1_+_110696331.23-P1P2	GGCGGGCCCGCCTCTATATA	3	Hsp90aa1_-_110696346.23-P1P2	GCGCCGGCCTTATATAGAGG	4	Hsp90aa1_+_110696331.23-P1P2|Hsp90aa1_-_110696346.23-P1P2
Olfr822	ENSMUST00000080460.2	Olfr822_+_130074839.23-ENSMUST00000080460.2	GACTAATAAGCCAACAACTG	3	Olfr822_+_130074676.23-ENSMUST00000080460.2	GGCACAATTATTGTAAGAAA	4	Olfr822_+_130074839.23-ENSMUST00000080460.2|Olfr822_+_130074676.23-ENSMUST00000080460.2
Prpmp5	ENSMUST00000048686.8	Prpmp5_-_132314343.23-ENSMUST00000048686.8	GTCACTGTCCTCTACAAACA	3	Prpmp5_+_132314431.23-ENSMUST00000048686.8	GTATAAAAAGACCTTTTTTG	4	Prpmp5_-_132314343.23-ENSMUST00000048686.8|Prpmp5_+_132314431.23-ENSMUST00000048686.8
Tapt1	P1P2	Tapt1_-_44226580.23-P1P2	GCCGCCGCCTTCTCCCGGGG	3	Tapt1_+_44226599.23-P1P2	GGTGTGTGGCTCTCGGAACA	4	Tapt1_-_44226580.23-P1P2|Tapt1_+_44226599.23-P1P2
Ufsp2	P1P2	Ufsp2_+_45975531.23-P1P2	GGTGCAAGCAAGGGTCGTCC	3	Ufsp2_-_45975581.23-P1P2	GGTGTTCTTGCCATCGCCAG	4	Ufsp2_+_45975531.23-P1P2|Ufsp2_-_45975581.23-P1P2
Nek2	P1P2	Nek2_-_191821564.23-P1P2	GGCAGGCAGACGAGGGGCTC	3	Nek2_-_191821519.23-P1P2	GAAGCCCGCGACGGTTGACC	4	Nek2_-_191821564.23-P1P2|Nek2_-_191821519.23-P1P2
Dlg3	P1	Dlg3_+_100777515.23-P1	GGTCGAGGAAGCCAAGGTGG	3	Dlg3_-_100777329.23-P1	GCAGAGGGACCGGCCGGAGC	4	Dlg3_+_100777515.23-P1|Dlg3_-_100777329.23-P1
Tm6sf2	P1P2	Tm6sf2_+_70072972.23-P1P2	GGGCAGCGGCACCCCGACCC	3	Tm6sf2_-_70072966.23-P1P2	GACGGAGCCAAGCGTCCTGG	4	Tm6sf2_+_70072972.23-P1P2|Tm6sf2_-_70072966.23-P1P2
Myoz1	P1P2	Myoz1_-_20656452.23-P1P2	GCAGCTGCTCAGTTGGTGGT	3	Myoz1_-_20656464.23-P1P2	GTGGTGGTCGGCTCTCCCCG	4	Myoz1_-_20656452.23-P1P2|Myoz1_-_20656464.23-P1P2
Atg2b	P1P2	Atg2b_+_105685213.23-P1P2	GGCCAGGAGCGTGTCTCAGG	3	Atg2b_-_105685233.23-P1P2	GCCCGCCTGAGACACGCTCC	4	Atg2b_+_105685213.23-P1P2|Atg2b_-_105685233.23-P1P2
Clec4b2	P1P2	Clec4b2_-_123173172.23-P1P2	GGGTAATGGTACATCCAAGT	3	Clec4b2_-_123172936.23-P1P2	GATTCTAGTGAATTTAGCTT	4	Clec4b2_-_123173172.23-P1P2|Clec4b2_-_123172936.23-P1P2
Nlrp4c	P1P2	Nlrp4c_+_6045254.23-P1P2	GAAAGAAAATAAGTGCATAC	3	Nlrp4c_-_6045416.23-P1P2	GGGGTAGCCAAGACACTTTC	4	Nlrp4c_+_6045254.23-P1P2|Nlrp4c_-_6045416.23-P1P2
Chrdl1	P1P2	Chrdl1_-_143393721.23-P1P2	GACCCTGTGGGAACGTCCAG	3	Chrdl1_-_143393888.23-P1P2	GGGCGCTCCTCCGAGGTCTG	4	Chrdl1_-_143393721.23-P1P2|Chrdl1_-_143393888.23-P1P2
Cacng3	P1P2	Cacng3_-_122671583.23-P1P2	GACCCTCCCGAGGGCCATAG	3	Cacng3_-_122671591.23-P1P2	GGAGGGCCATAGAGGACTCG	4	Cacng3_-_122671583.23-P1P2|Cacng3_-_122671591.23-P1P2
Fam193a	P1P2	Fam193a_+_34370187.23-P1P2	GTCATGGCGGGAGTGAGGGA	3	Fam193a_-_34369980.23-P1P2	GTCTTAACTCTGGTCAGCGG	4	Fam193a_+_34370187.23-P1P2|Fam193a_-_34369980.23-P1P2
Zfp334	P1P2	Zfp334_-_165388233.23-P1P2	GAGGCAATTGTGGCGCACAG	3	Zfp334_+_165388279.23-P1P2	GCGCGGTCTCCTAGGCTCTA	4	Zfp334_-_165388233.23-P1P2|Zfp334_+_165388279.23-P1P2
Adamdec1	P1P2	Adamdec1_-_68582011.23-P1P2	GAGCAGGACCCAAGACATGC	3	Adamdec1_+_68582068.23-P1P2	GAACTAGAAGGAGATAAAAC	4	Adamdec1_-_68582011.23-P1P2|Adamdec1_+_68582068.23-P1P2
Dscc1	P1P2	Dscc1_-_55090405.23-P1P2	GACTTCCTCGCGGGTCCTCC	3	Dscc1_-_55090415.23-P1P2	GGGGTCCTCCGGGAAGCGCT	4	Dscc1_-_55090405.23-P1P2|Dscc1_-_55090415.23-P1P2
Rpa2	P1P2	Rpa2_+_132768736.23-P1P2	GGGCGACCCGAAGCCACCGG	3	Rpa2_+_132768414.23-P1P2	GGAGAGCGGCCCAAGACGCT	4	Rpa2_+_132768736.23-P1P2|Rpa2_+_132768414.23-P1P2
Ctgf	P1P2	Ctgf_+_24595551.23-P1P2	GGGAGGAGGTCGGTCTCCTG	3	Ctgf_+_24595568.23-P1P2	GTGGGGCTGCTGCCGTCTGG	4	Ctgf_+_24595551.23-P1P2|Ctgf_+_24595568.23-P1P2
C1ql4	ENSMUST00000064462.3	C1ql4_-_99087580.23-ENSMUST00000064462.3	GTGGCACCTGGAGGTAAGGA	3	C1ql4_+_99087773.23-ENSMUST00000064462.3	GGCTGGCCCTGGCCGCGTCA	4	C1ql4_-_99087580.23-ENSMUST00000064462.3|C1ql4_+_99087773.23-ENSMUST00000064462.3
Zfp623	P1P2	Zfp623_+_75941145.23-P1P2	GTCACTCACCCGGAGCTCGG	3	Zfp623_+_75941103.23-P1P2	GAAGCCGAGCAGCATCCAGG	4	Zfp623_+_75941145.23-P1P2|Zfp623_+_75941103.23-P1P2
Plekhh2	P1P2	Plekhh2_+_84511865.23-P1P2	GCCGCACTCGGAGCTCCGAG	3	Plekhh2_+_84511956.23-P1P2	GGCCCACCTGCCTACCTCTG	4	Plekhh2_+_84511865.23-P1P2|Plekhh2_+_84511956.23-P1P2
Pglyrp2	P2	Pglyrp2_-_32424047.23-P2	Gtggttggcctggacactct	3	Pglyrp2_-_32424118.23-P2	Gaacggagatgcaagaatgg	4	Pglyrp2_-_32424047.23-P2|Pglyrp2_-_32424118.23-P2
Pter	P1P2	Pter_-_12924146.23-P1P2	GGAGAAGGCGGCGCACAGCG	3	Pter_-_12924154.23-P1P2	GGGCGCACAGCGCGGAATGA	4	Pter_-_12924146.23-P1P2|Pter_-_12924154.23-P1P2
Eif3f	P1P2	Eif3f_+_108934491.23-P1P2	Gccggggctgcggtgacgac	3	Eif3f_+_108934483.23-P1P2	Ggcggtgacgaccggcgccg	4	Eif3f_+_108934491.23-P1P2|Eif3f_+_108934483.23-P1P2
Themis2	P1P2	Themis2_-_132796306.23-P1P2	GCGCAGCACGCGCGGAAGGG	3	Themis2_-_132796303.23-P1P2	GACCCGCAGCACGCGCGGAA	4	Themis2_-_132796306.23-P1P2|Themis2_-_132796303.23-P1P2
Zcchc14	P1P2	Zcchc14_-_121652832.23-P1P2	GAGGGATCCAGCGGGACCCG	3	Zcchc14_-_121652836.23-P1P2	GATCCAGCGGGACCCGCGGA	4	Zcchc14_-_121652832.23-P1P2|Zcchc14_-_121652836.23-P1P2
Sertad1	P1P2	Sertad1_+_27486965.23-P1P2	GCAGCAACCGACACCTGGGA	3	Sertad1_-_27487169.23-P1P2	GACCTCAGCTAGGTAGATGG	4	Sertad1_+_27486965.23-P1P2|Sertad1_-_27487169.23-P1P2
Gm382	P1P2	Gm382_-_127040021.23-P1P2	GCTGGTAGTTCATCCTTTCC	3	Gm382_+_127040066.23-P1P2	GTAGAATAATCAAAAGTCAA	4	Gm382_-_127040021.23-P1P2|Gm382_+_127040066.23-P1P2
Vstm2b	P1P2	Vstm2b_-_40898882.23-P1P2	GCGCCTTGAAGAGTGAGCGG	3	Vstm2b_-_40898821.23-P1P2	GCTCTCCCCGCGCTGCGCTA	4	Vstm2b_-_40898882.23-P1P2|Vstm2b_-_40898821.23-P1P2
Elf4	P1P2	Elf4_-_48454095.23-P1P2	GGGAGGCCGCGCCGAGGGAA	3	Elf4_+_48454109.23-P1P2	GGCGCCCCCCTCCTCATCAG	4	Elf4_-_48454095.23-P1P2|Elf4_+_48454109.23-P1P2
Cds2	P1P2	Cds2_-_132263457.23-P1P2	GCCCCAGCATGACCGAACTA	3	Cds2_-_132263214.23-P1P2	GTGGCTCGCAGCTTCCCGGG	4	Cds2_-_132263457.23-P1P2|Cds2_-_132263214.23-P1P2
Lynx1	P1P2	Lynx1_+_74752997.23-P1P2	GCAGTCGTGAGCAGGCACTG	3	Lynx1_+_74752756.23-P1P2	GGGCGGAGCTCCCCGAGATG	4	Lynx1_+_74752997.23-P1P2|Lynx1_+_74752756.23-P1P2
Il13ra1	P1P2	Il13ra1_+_36112176.23-P1P2	GGCCATGCAGCCCCTCGCCT	3	Il13ra1_+_36112152.23-P1P2	GCGTGGCCCGGCTGGAGCCG	4	Il13ra1_+_36112176.23-P1P2|Il13ra1_+_36112152.23-P1P2
Esrrb	P1	Esrrb_+_86421671.23-P1	GGGACGCCAAGCCGTGGAGG	3	Esrrb_-_86421661.23-P1	GGTTAGTGGGCTCCAAGTGT	4	Esrrb_+_86421671.23-P1|Esrrb_-_86421661.23-P1
Htra3	P1	Htra3_+_35679453.23-P1	GGCTGAAGCTCGGCTGAGAG	3	Htra3_+_35679261.23-P1	GCTGGCCCGGGAGCCCCCAG	4	Htra3_+_35679453.23-P1|Htra3_+_35679261.23-P1
Gid4	P1P2	Gid4_-_60417464.23-P1P2	GggagacccaGCTCAGGTCT	3	Gid4_-_60417458.23-P1P2	GgggaagggagacccaGCTC	4	Gid4_-_60417464.23-P1P2|Gid4_-_60417458.23-P1P2
Uba2	P1P2	Uba2_-_34168544.23-P1P2	GCGAGCCGCCTCACAGTCGG	3	Uba2_+_34168506.23-P1P2	GGCTCGTAGACGTCCCGCCA	4	Uba2_-_34168544.23-P1P2|Uba2_+_34168506.23-P1P2
Hpgds	P1P2	Hpgds_-_65144362.23-P1P2	GCACGTATACAGGGTTGAAG	3	Hpgds_-_65144768.23-P1P2	GGCAGTCACAAGACAGCCAG	4	Hpgds_-_65144362.23-P1P2|Hpgds_-_65144768.23-P1P2
Krt2	P1P2	Krt2_+_101817949.23-P1P2	GGCATAAGCCGCCACGGTGG	3	Krt2_-_101818186.23-P1P2	GTGCTGTCGGGAGACTCACA	4	Krt2_+_101817949.23-P1P2|Krt2_-_101818186.23-P1P2
1700013H16Rik	P1P2	1700013H16Rik_-_53757778.23-P1P2	GTCACCTTCACACCCCTGGT	3	1700013H16Rik_-_53757801.23-P1P2	GTTCAGCGGCCTTCGAGGAG	4	1700013H16Rik_-_53757778.23-P1P2|1700013H16Rik_-_53757801.23-P1P2
Gm9846	ENSMUST00000053150.5	Gm9846_+_114982731.23-ENSMUST00000053150.5	GGAACTTATCCCTTGCTTTC	3	Gm9846_+_114982345.23-ENSMUST00000053150.5	GaagaaCTTATCCCTTGgcc	4	Gm9846_+_114982731.23-ENSMUST00000053150.5|Gm9846_+_114982345.23-ENSMUST00000053150.5
Lrrc26	P1P2	Lrrc26_+_25290015.23-P1P2	Ggcagcagagagagttgcgg	3	Lrrc26_-_25289995.23-P1P2	Ggcccgaagccgcacatgcg	4	Lrrc26_+_25290015.23-P1P2|Lrrc26_-_25289995.23-P1P2
Acsl1	P1P2	Acsl1_-_46471207.23-P1P2	GTTGCAGTGACAGCCGCCTG	3	Acsl1_-_46471269.23-P1P2	GAAGGGCCGCGAGTCGGCCA	4	Acsl1_-_46471207.23-P1P2|Acsl1_-_46471269.23-P1P2
Kcnh7	P1P2	Kcnh7_+_63184260.23-P1P2	GGCCCCCTCCGGAAGGTGAG	3	Kcnh7_-_63184277.23-P1P2	GCATCCCGCTCACCTTCCGG	4	Kcnh7_+_63184260.23-P1P2|Kcnh7_-_63184277.23-P1P2
Etv2	P1P2	Etv2_+_30636113.23-P1P2	GCCCCCCTGGCTAGGAGAGA	3	Etv2_+_30636266.23-P1P2	GGTGCGCATCCCTAAAGCAG	4	Etv2_+_30636113.23-P1P2|Etv2_+_30636266.23-P1P2
Bdkrb1	ENSMUST00000041229.4	Bdkrb1_-_105604134.23-ENSMUST00000041229.4	Gtctgggatagaccacagct	3	Bdkrb1_+_105604293.23-ENSMUST00000041229.4	GAGACAGTGATGACAAACCC	4	Bdkrb1_-_105604134.23-ENSMUST00000041229.4|Bdkrb1_+_105604293.23-ENSMUST00000041229.4
Chac2	P1P2	Chac2_+_30986292.23-P1P2	GAGCAGCCGGTTACTCCCCT	3	Chac2_+_30986105.23-P1P2	GCGGGGTCCCAGGCAAGGTA	4	Chac2_+_30986292.23-P1P2|Chac2_+_30986105.23-P1P2
Commd4	P1P2	Commd4_-_57158099.23-P1P2	GGAGAGTCTGAGAATCCGGG	3	Commd4_+_57158264.23-P1P2	GTCTCCTGACATCATGGTGA	4	Commd4_-_57158099.23-P1P2|Commd4_+_57158264.23-P1P2
Commd3	P1P2	Commd3_-_18672467.23-P1P2	GGGTCACGGCGCGCTCACAA	3	Commd3_+_18672534.23-P1P2	GGCCCGGAGGAGAAGCGCGA	4	Commd3_-_18672467.23-P1P2|Commd3_+_18672534.23-P1P2
Btc	P1P2	Btc_-_91402893.23-P1P2	GAGCAGGGAAACACCCGGGG	3	Btc_-_91402807.23-P1P2	GCTGGGCCCTGGCACCGAGA	4	Btc_-_91402893.23-P1P2|Btc_-_91402807.23-P1P2
Mapk14	P1P2	Mapk14_+_28691490.23-P1P2	GCTGCAGCCGCTCCCCGGGG	3	Mapk14_-_28691474.23-P1P2	GAGCGCGAGCGGGTGTCTTG	4	Mapk14_+_28691490.23-P1P2|Mapk14_-_28691474.23-P1P2
Zfp873	P1P2	Zfp873_+_82048383.23-P1P2	GTGTACGCAGGCGCAGAGAG	3	Zfp873_+_82048339.23-P1P2	GGCCTCCGCCTGGGAGATGA	4	Zfp873_+_82048383.23-P1P2|Zfp873_+_82048339.23-P1P2
Olfr209	ENSMUST00000055868.3	Olfr209_-_59362141.23-ENSMUST00000055868.3	GGAGAAAGAACACCAGGAAC	3	Olfr209_+_59361737.23-ENSMUST00000055868.3	GTACATGGTCTACTTCATGT	4	Olfr209_-_59362141.23-ENSMUST00000055868.3|Olfr209_+_59361737.23-ENSMUST00000055868.3
Sec23a	P1P2	Sec23a_-_59011862.23-P1P2	GCTACCTAGAAGCTCCGTGA	3	Sec23a_+_59011869.23-P1P2	GTGACGACTGTGCAAGGCGG	4	Sec23a_-_59011862.23-P1P2|Sec23a_+_59011869.23-P1P2
Spink4	P1P2	Spink4_+_40920125.23-P1P2	GATGCCAAGGAGGGGAACCA	3	Spink4_-_40920111.23-P1P2	GCAGCATGGCTATGCATCTG	4	Spink4_+_40920125.23-P1P2|Spink4_-_40920111.23-P1P2
Nubpl	P1P2	Nubpl_-_52097955.23-P1P2	GTAGCGGGTTTGCTACAAGG	3	Nubpl_+_52097827.23-P1P2	GAGTGGCCGCGCCACCACCC	4	Nubpl_-_52097955.23-P1P2|Nubpl_+_52097827.23-P1P2
Trim12c	P1P2	Trim12c_-_104352957.23-P1P2	GTGGTAGGAAACAACGCTCT	3	Trim12c_-_104353021.23-P1P2	GTGAAGGGGGAGACTAAACC	4	Trim12c_-_104352957.23-P1P2|Trim12c_-_104353021.23-P1P2
Cybb	P1P2	Cybb_-_9469218.23-P1P2	GGTACTTACAATGACAAAGA	3	Cybb_-_9469045.23-P1P2	GtgcTGGGATTAAGAAGCCT	4	Cybb_-_9469218.23-P1P2|Cybb_-_9469045.23-P1P2
BC100530	P1P2	BC100530_+_36367613.23-P1P2	GCCCATTCCCTCAGATATTT	3	BC100530_+_36367487.23-P1P2	GTCATCAAGATGAGTCTCGG	4	BC100530_+_36367613.23-P1P2|BC100530_+_36367487.23-P1P2
Arc	P1P2	Arc_-_74672334.23-P1P2	GCCACCCCGCGGGGCAGGGT	3	Arc_+_74672231.23-P1P2	GACACGTACGGAGGACCCAC	4	Arc_-_74672334.23-P1P2|Arc_+_74672231.23-P1P2
Nkd2	P1P2	Nkd2_-_73847342.23-P1P2	GGGACACAGGGAAGACGGAA	3	Nkd2_-_73847555.23-P1P2	GGATCCGGGGCCGGGCAGTC	4	Nkd2_-_73847342.23-P1P2|Nkd2_-_73847555.23-P1P2
Ccnk	P1P2	Ccnk_-_108180090.23-P1P2	GGACAGGGTCGGGTCCTCTG	3	Ccnk_+_108180212.23-P1P2	GAAGCCGTGGGTGACCGGGT	4	Ccnk_-_108180090.23-P1P2|Ccnk_+_108180212.23-P1P2
Igkv1-115	ENSMUST00000168090.1	Igkv1-115_-_68161849.23-ENSMUST00000168090.1	GGCTGAGGGCATGTGCATCT	3	Igkv1-115_-_68161533.23-ENSMUST00000168090.1	GTGGAAATTCCTATTTGGAA	4	Igkv1-115_-_68161849.23-ENSMUST00000168090.1|Igkv1-115_-_68161533.23-ENSMUST00000168090.1
Tceal3	P1P2	Tceal3_-_136666404.23-P1P2	GACCGGCCAGGCGCAGACGT	3	Tceal3_-_136666443.23-P1P2	GGCTTGCCCGCCCTACGGTC	4	Tceal3_-_136666404.23-P1P2|Tceal3_-_136666443.23-P1P2
Micu3	ENSMUST00000068999.7	Micu3_+_40307660.23-ENSMUST00000068999.7	GCTGCTCTGGGTGCCCTGCT	3	Micu3_-_40307811.23-ENSMUST00000068999.7	GCGGGCGCCGTCCTCTACCA	4	Micu3_+_40307660.23-ENSMUST00000068999.7|Micu3_-_40307811.23-ENSMUST00000068999.7
Vmn2r59	ENSMUST00000168489.1	Vmn2r59_-_42058685.23-ENSMUST00000168489.1	GGATTTTTGAATGGAAAGGT	3	Vmn2r59_-_42058537.23-ENSMUST00000168489.1	GAAATATTCAAATTATATGG	4	Vmn2r59_-_42058685.23-ENSMUST00000168489.1|Vmn2r59_-_42058537.23-ENSMUST00000168489.1
Myo7b	P1P2	Myo7b_-_32036967.23-P1P2	GTCAAAACTCCTGGCAGTGT	3	Myo7b_+_32036896.23-P1P2	GGCCCAGGGTGTAGTCAAAA	4	Myo7b_-_32036967.23-P1P2|Myo7b_+_32036896.23-P1P2
Ccm2	P1P2	Ccm2_-_6547008.23-P1P2	GgcacgcggcgACATGGAGG	3	Ccm2_-_6547138.23-P1P2	GgcaggGACAGCGGTCAGGT	4	Ccm2_-_6547008.23-P1P2|Ccm2_-_6547138.23-P1P2
Cep55	P1P2	Cep55_+_38055140.23-P1P2	GGAGGTCTAGTCCTGCCCAG	3	Cep55_-_38055103.23-P1P2	GTAGTGAGTGGTCCCGGCCT	4	Cep55_+_38055140.23-P1P2|Cep55_-_38055103.23-P1P2
Eif4e2	P1P2	Eif4e2_-_87213979.23-P1P2	GAAGTCACTCCGTGAGGCAG	3	Eif4e2_-_87213957.23-P1P2	GGCGATGGGACCCGGTAGAG	4	Eif4e2_-_87213979.23-P1P2|Eif4e2_-_87213957.23-P1P2
Olfr1164	ENSMUST00000099834.2	Olfr1164_+_88093887.23-ENSMUST00000099834.2	GGAAGCCAAGTGTGGAATGA	3	Olfr1164_-_88093971.23-ENSMUST00000099834.2	GCAACACAGGAATGCGATGA	4	Olfr1164_+_88093887.23-ENSMUST00000099834.2|Olfr1164_-_88093971.23-ENSMUST00000099834.2
Lfng	P1P2	Lfng_-_140607384.23-P1P2	GCAGCCGGACCAGTTGGCAC	3	Lfng_-_140607353.23-P1P2	GAGAGGCGCGCAGCTGGACC	4	Lfng_-_140607384.23-P1P2|Lfng_-_140607353.23-P1P2
Bend5	P1P2	Bend5_+_111415101.23-P1P2	GGAGGTGGGGACCCCTAGAG	3	Bend5_+_111415343.23-P1P2	GAGCGCGCCCCAGTCCCGAG	4	Bend5_+_111415101.23-P1P2|Bend5_+_111415343.23-P1P2
Idh3g	P1P2	Idh3g_+_73786639.23-P1P2	GGTGCGAGCCATAGGAGGGG	3	Idh3g_+_73786812.23-P1P2	GGCTGCTGGCGGTGCTGCAA	4	Idh3g_+_73786639.23-P1P2|Idh3g_+_73786812.23-P1P2
Kctd9	P1P2	Kctd9_-_67716216.23-P1P2	GAGTGTGGGGCCGACCAGGA	3	Kctd9_-_67716181.23-P1P2	GCCCCGGGGTGTGGGACTGA	4	Kctd9_-_67716216.23-P1P2|Kctd9_-_67716181.23-P1P2
Spib	P1P2	Spib_-_44531990.23-P1P2	GGAGGATGCTGTGCTGAGTG	3	Spib_-_44532009.23-P1P2	GGGGTGGGGGTCCCAAGAAC	4	Spib_-_44531990.23-P1P2|Spib_-_44532009.23-P1P2
Slc38a6	P1P2	Slc38a6_-_73286930.23-P1P2	GCGGTCGCGGAGCACCATGC	3	Slc38a6_-_73287116.23-P1P2	GGAGGAGCCTTGGACTGCAG	4	Slc38a6_-_73286930.23-P1P2|Slc38a6_-_73287116.23-P1P2
Ptpn7	P1P2	Ptpn7_+_135132755.23-P1P2	GTGAAGAAGCTATGTCCCCC	3	Ptpn7_+_135133375.23-P1P2	GGAAGCACTGGATCCAGTCA	4	Ptpn7_+_135132755.23-P1P2|Ptpn7_+_135133375.23-P1P2
N6amt1	P1P2	N6amt1_-_87354235.23-P1P2	GGTACTCAACGCCCGCCCAT	3	N6amt1_-_87354246.23-P1P2	GCCGCCCATAGGAAGCGGAA	4	N6amt1_-_87354235.23-P1P2|N6amt1_-_87354246.23-P1P2
Tcerg1l	P1P2	Tcerg1l_-_138397441.23-P1P2	GGGCAGCCGCGGGAGCAACG	3	Tcerg1l_-_138397475.23-P1P2	GGCGCCGAGGCCAACAGCAC	4	Tcerg1l_-_138397441.23-P1P2|Tcerg1l_-_138397475.23-P1P2
Otud7b	P1P2	Otud7b_+_96104580.23-P1P2	GTCCGCCGGCTCCTCCACAC	3	Otud7b_+_96104540.23-P1P2	GGCGGCTGGTTCAGGATCGG	4	Otud7b_+_96104580.23-P1P2|Otud7b_+_96104540.23-P1P2
Zfyve9	P1P2	Zfyve9_-_108780539.23-P1P2	GAAGCCTCGCACTCCTGAGG	3	Zfyve9_-_108780690.23-P1P2	GCGATGCAGGCAGACGGGCT	4	Zfyve9_-_108780539.23-P1P2|Zfyve9_-_108780690.23-P1P2
Klrc2	ENSMUST00000071920.4,ENSMUST00000118401.1,ENSMUST00000119533.1	Klrc2_+_129660572.23-ENSMUST00000071920.4,ENSMUST00000118401.1,ENSMUST00000119533.1	GCAGAATTGATATCACTCAC	3	Klrc2_+_129660352.23-ENSMUST00000071920.4,ENSMUST00000118401.1,ENSMUST00000119533.1	GTCTCGGCATAACCATTCTA	4	Klrc2_+_129660572.23-ENSMUST00000071920.4,ENSMUST00000118401.1,ENSMUST00000119533.1|Klrc2_+_129660352.23-ENSMUST00000071920.4,ENSMUST00000118401.1,ENSMUST00000119533.1
Atxn1	P1P2	Atxn1_+_45964947.23-P1P2	GTACAGTGGAGGAGCCGTAC	3	Atxn1_+_45964961.23-P1P2	GGACATCATTTCTACTACAG	4	Atxn1_+_45964947.23-P1P2|Atxn1_+_45964961.23-P1P2
Atp13a1	P1P2	Atp13a1_-_69791267.23-P1P2	GTGGGAAAGATGGCGGTGGT	3	Atp13a1_+_69791278.23-P1P2	GCGCCAGGCCGGGCTCCGCA	4	Atp13a1_-_69791267.23-P1P2|Atp13a1_+_69791278.23-P1P2
Aaas	P1P2	Aaas_+_102350622.23-P1P2	GTTCCAGACGCTCTCCGGAC	3	Aaas_+_102350603.23-P1P2	GTGGCAAGATGTGCTCCCTG	4	Aaas_+_102350622.23-P1P2|Aaas_+_102350603.23-P1P2
BC028528	P1P2	BC028528_-_95891921.23-P1P2	GAACAAGGAGGGCTATAAAG	3	BC028528_-_95891906.23-P1P2	GCAGGATGAGTGGTGCAACA	4	BC028528_-_95891921.23-P1P2|BC028528_-_95891906.23-P1P2
Smyd5	P1P2	Smyd5_-_85431987.23-P1P2	GGACGGGGTCAAGGGTCAGA	3	Smyd5_+_85432059.23-P1P2	GCGGACTTCCACGGAACCCC	4	Smyd5_-_85431987.23-P1P2|Smyd5_+_85432059.23-P1P2
Morc2a	P1P2	Morc2a_-_3649304.23-P1P2	GGGAGACAAAGCGGTGGCTG	3	Morc2a_+_3649586.23-P1P2	GGGAGTTAGTCCCAGAGCCT	4	Morc2a_-_3649304.23-P1P2|Morc2a_+_3649586.23-P1P2
Iqub	P1P2	Iqub_+_24514961.23-P1P2	GACAGGTAAGAGGACACGTT	3	Iqub_-_24514804.23-P1P2	GACTAGAGAAGGGTCAAAAG	4	Iqub_+_24514961.23-P1P2|Iqub_-_24514804.23-P1P2
Fhl3	P1P2	Fhl3_+_124700737.23-P1P2	GGGCCGAGAGAGCAGCGGCG	3	Fhl3_+_124700772.23-P1P2	GCCCGGCGGCTCCTACCTGT	4	Fhl3_+_124700737.23-P1P2|Fhl3_+_124700772.23-P1P2
Zfp120	P1P2	Zfp120_+_150136487.23-P1P2	GGGAGTGCTGGGTCGTCCCA	3	Zfp120_+_150136539.23-P1P2	GGCCAGGCGGTCTCCCACAA	4	Zfp120_+_150136487.23-P1P2|Zfp120_+_150136539.23-P1P2
Prl7b1	P1P2	Prl7b1_+_27610579.23-P1P2	GTATGAAGTAAGGAGACATC	3	Prl7b1_+_27610124.23-P1P2	Gctgggacagtagagataga	4	Prl7b1_+_27610579.23-P1P2|Prl7b1_+_27610124.23-P1P2
Tmx2	P1P2	Tmx2_-_84678447.23-P1P2	GCCAGGAGCGCAGAGTGCTA	3	Tmx2_-_84678323.23-P1P2	GTAAGTTGCCGGAAGATGGT	4	Tmx2_-_84678447.23-P1P2|Tmx2_-_84678323.23-P1P2
Gemin2	P1P2	Gemin2_-_59013479.23-P1P2	GCTGGCGGGAGCGAGAACCA	3	Gemin2_-_59013464.23-P1P2	GGGGCGCCGATTGAGACTGG	4	Gemin2_-_59013479.23-P1P2|Gemin2_-_59013464.23-P1P2
Osbpl2	P1P2	Osbpl2_-_180119351.23-P1P2	GCGGCGAGCGGCGAGCAGCA	3	Osbpl2_-_180119371.23-P1P2	GGGCGGGCTGTAGGTCGGAG	4	Osbpl2_-_180119351.23-P1P2|Osbpl2_-_180119371.23-P1P2
Srgap1	P1P2	Srgap1_+_122047557.23-P1P2	GcccgcgcgggTCTCAACAA	3	Srgap1_+_122047742.23-P1P2	GAACTCCGCGGGGCTGACCG	4	Srgap1_+_122047557.23-P1P2|Srgap1_+_122047742.23-P1P2
2310002J15Rik	P1	2310002J15Rik_+_25239583.23-P1	GTCGGGATATGGCTCTCCAA	3	2310002J15Rik_+_25239846.23-P1	GGCTCACCCGCACTGGGACC	4	2310002J15Rik_+_25239583.23-P1|2310002J15Rik_+_25239846.23-P1
Gm14085	ENSMUST00000110521.2	Gm14085_-_122485113.23-ENSMUST00000110521.2	Gtggagatatcccactgaac	3	Gm14085_-_122485214.23-ENSMUST00000110521.2	Gaactctttccctacaatgg	4	Gm14085_-_122485113.23-ENSMUST00000110521.2|Gm14085_-_122485214.23-ENSMUST00000110521.2
Ache	P1P2	Ache_-_137288290.23-P1P2	GcggaggcggCTGTCACTGT	3	Ache_+_137288302.23-P1P2	GGGAGGCGGCCAATGTTCCC	4	Ache_-_137288290.23-P1P2|Ache_+_137288302.23-P1P2
Vmn1r172	ENSMUST00000038694.7,ENSMUST00000173101.1	Vmn1r172_-_23658465.23-ENSMUST00000038694.7,ENSMUST00000173101.1	GATCCTTGATGTGATTTGGC	3	Vmn1r172_-_23658847.23-ENSMUST00000038694.7,ENSMUST00000173101.1	GTCAACTGTGATGATGTTAT	4	Vmn1r172_-_23658465.23-ENSMUST00000038694.7,ENSMUST00000173101.1|Vmn1r172_-_23658847.23-ENSMUST00000038694.7,ENSMUST00000173101.1
Recql5	P1P2	Recql5_+_115933451.23-P1P2	GTCTACTTCGCTGACTTCTC	3	Recql5_+_115933299.23-P1P2	GGGCTCAGAGGAGGAACGGG	4	Recql5_+_115933451.23-P1P2|Recql5_+_115933299.23-P1P2
Them5	P1P2	Them5_-_94342163.23-P1P2	GCTAGAAGAAAGCCCGTGTT	3	Them5_+_94342102.23-P1P2	GGAAGAAACTGTGCAAGACT	4	Them5_-_94342163.23-P1P2|Them5_+_94342102.23-P1P2
RP24-242F4.9	P1P2	RP24-242F4.9_+_67360546.23-P1P2	GTTAACTTCTCCCCAGAGTT	3	RP24-242F4.9_+_67360403.23-P1P2	GCTGGGCTTGTTATGAGACA	4	RP24-242F4.9_+_67360546.23-P1P2|RP24-242F4.9_+_67360403.23-P1P2
[truncated: 21,792 more rows]

## Sheet: 5_6
gene	transcript	sgID_A	protospacer_A	rank_A	sgID_B	protospacer_B	rank_B	sgID_AB
[truncated: 22,100 more rows]
