# Supplementary material for: Maximizing CRISPRi efficacy and accessibility with dual-sgRNA libraries and optimal effectors
Source: eLife. 2022 Dec 28;11:e81856. doi: 10.7554/eLife.81856 (PMC9829409; doi:10.7554/eLife.81856)
Supplement: Supplementary file 11. [file elife-81856-supp11.xlsx]

## Sheet: 1_2
gene	transcript	sgID_A	protospacer_A	rank_A	sgID_B	protospacer_B	rank_B	sgID_AB
Dapl1	P1P2	Dapl1_-_59484559.23-P1P2	GCAAAGAGACTCAGGTTCCA	1	Dapl1_+_59484485.23-P1P2	GAAGCCAGGTAGATGTTTAC	2	Dapl1_-_59484559.23-P1P2|Dapl1_+_59484485.23-P1P2
E2f8	P1P2	E2f8_+_48881144.23-P1P2	GGGGACCTCTAGCCAATCGC	1	E2f8_-_48881161.23-P1P2	GAAGGCCTGCGATTGGCTAG	2	E2f8_+_48881144.23-P1P2|E2f8_-_48881161.23-P1P2
Rhoc	P1P2	Rhoc_+_104788873.23-P1P2	GAGGACCCGGCAAGGGGCGT	1	Rhoc_-_104788913.23-P1P2	GCCTCAGCCGGGGTGACCTG	2	Rhoc_+_104788873.23-P1P2|Rhoc_-_104788913.23-P1P2
Plscr3	P1P2	Plscr3_+_69846463.23-P1P2	GCCTTCCGCTCCGACTGCAG	1	Plscr3_-_69846497.23-P1P2	GAGCGGAAGGGGCGGAACCA	2	Plscr3_+_69846463.23-P1P2|Plscr3_-_69846497.23-P1P2
Cmtm6	P1P2	Cmtm6_-_114731068.23-P1P2	GGAGGCGCGGCAAACCATGG	1	Cmtm6_-_114731095.23-P1P2	GCAAAGGGAGAGAAATTCTA	2	Cmtm6_-_114731068.23-P1P2|Cmtm6_-_114731095.23-P1P2
Cdsn	P1P2	Cdsn_+_35551999.23-P1P2	GTCAGCAGAAGAGGTGACTG	1	Cdsn_+_35552060.23-P1P2	GTGCCTGAGGGAAGTTGGTG	2	Cdsn_+_35551999.23-P1P2|Cdsn_+_35552060.23-P1P2
Zfp1	P1P2	Zfp1_+_111643450.23-P1P2	GCGGCCGTTCCCAGAGTCCT	1	Zfp1_-_111643218.23-P1P2	GAAGGTGTGTGCTTCCAGTG	2	Zfp1_+_111643450.23-P1P2|Zfp1_-_111643218.23-P1P2
Olfr988	ENSMUST00000099928.2	Olfr988_-_85354065.23-ENSMUST00000099928.2	GTCTGTGATTCAACTCATGT	1	Olfr988_-_85354540.23-ENSMUST00000099928.2	Gggaataataataagctccc	2	Olfr988_-_85354065.23-ENSMUST00000099928.2|Olfr988_-_85354540.23-ENSMUST00000099928.2
Cst10	P1P2	Cst10_-_149405207.23-P1P2	GGGAAGAAGTTGTGAGTCAG	1	Cst10_-_149405241.23-P1P2	GTGGAACAAGGAGGATCTAG	2	Cst10_-_149405207.23-P1P2|Cst10_-_149405241.23-P1P2
Rbm24	P1P2	Rbm24_+_46418303.23-P1P2	GGCGCTGGGTCGCCTGGCTG	1	Rbm24_+_46418268.23-P1P2	GGCTGGGGCAGAGTTGGAAA	2	Rbm24_+_46418303.23-P1P2|Rbm24_+_46418268.23-P1P2
Scd4	P1P2	Scd4_+_44333153.23-P1P2	GAAGACTGAAGGCGAGAGAG	1	Scd4_+_44333108.23-P1P2	GTCACCTAAGGCAAGGCTAT	2	Scd4_+_44333153.23-P1P2|Scd4_+_44333108.23-P1P2
Gnai2	P1P2	Gnai2_-_107635554.23-P1P2	GGAGAGCGGGGCCGCAACGA	1	Gnai2_-_107635507.23-P1P2	GCGGAGCCAAGGGAGAAGTT	2	Gnai2_-_107635554.23-P1P2|Gnai2_-_107635507.23-P1P2
Pla2g2c	P1P2	Pla2g2c_+_138725143.23-P1P2	GTGGGTCCCCAGAAACTGAG	1	Pla2g2c_+_138725201.23-P1P2	GGGTCGCAGCCAGGCACCGG	2	Pla2g2c_+_138725143.23-P1P2|Pla2g2c_+_138725201.23-P1P2
2010111I01Rik	ENSMUST00000021911.8	2010111I01Rik_+_63014891.23-ENSMUST00000021911.8	GCTGCTCAGGGAAAAAAAGA	1	2010111I01Rik_-_63014970.23-ENSMUST00000021911.8	GCTGCAGGATCTGCAACTGC	2	2010111I01Rik_+_63014891.23-ENSMUST00000021911.8|2010111I01Rik_-_63014970.23-ENSMUST00000021911.8
Atat1	P1P2	Atat1_-_35910262.23-P1P2	GCCCTCCCAGTGAACAGCTG	1	Atat1_+_35910291.23-P1P2	GTGGTCTACCCGCAACTCCA	2	Atat1_-_35910262.23-P1P2|Atat1_+_35910291.23-P1P2
Sprr4	ENSMUST00000062129.1	Sprr4_+_92500685.23-ENSMUST00000062129.1	GAAAAGGCCCTTGAGAAGAA	1	Sprr4_+_92500554.23-ENSMUST00000062129.1	GACTGCTTGATGAGACAGGG	2	Sprr4_+_92500685.23-ENSMUST00000062129.1|Sprr4_+_92500554.23-ENSMUST00000062129.1
Rab6a	P1P2	Rab6a_+_100607627.23-P1P2	GAATCCCGGCTCCTCCCGTG	1	Rab6a_+_100607617.23-P1P2	GCCTCCCGTGCGGTGGAGAA	2	Rab6a_+_100607627.23-P1P2|Rab6a_+_100607617.23-P1P2
Il23r	P1P2	Il23r_-_67492188.23-P1P2	GggagctctaggccagGTGG	1	Il23r_+_67492156.23-P1P2	Gcctagagctcccatagacc	2	Il23r_-_67492188.23-P1P2|Il23r_+_67492156.23-P1P2
Sprr2a3	ENSMUST00000090872.4	Sprr2a3_+_92288336.23-ENSMUST00000090872.4	GTATTTCTGTTTCACACCAT	1	Sprr2a3_-_92288367.23-ENSMUST00000090872.4	GGAAACAGAAATAGATTCTT	2	Sprr2a3_+_92288336.23-ENSMUST00000090872.4|Sprr2a3_-_92288367.23-ENSMUST00000090872.4
Cdk2ap1	P1	Cdk2ap1_+_124355064.23-P1	GCTGGGATAGAGCCAGACGT	1	Cdk2ap1_-_124354817.23-P1	GcctcccgcgcgccgcTCAT	2	Cdk2ap1_+_124355064.23-P1|Cdk2ap1_-_124354817.23-P1
Elavl4	P1P2	Elavl4_+_110287833.23-P1P2	GAAGGACACTCCCACTGCGA	1	Elavl4_-_110287609.23-P1P2	GTGGCTGGGGAAACGAAGGG	2	Elavl4_+_110287833.23-P1P2|Elavl4_-_110287609.23-P1P2
Xrn2	P1P2	Xrn2_-_147012862.23-P1P2	GGAAGGCATCCGCCAGGAGT	1	Xrn2_+_147012969.23-P1P2	GCACCACCGCGGGGGATGCA	2	Xrn2_-_147012862.23-P1P2|Xrn2_+_147012969.23-P1P2
Casc1	P1P2	Casc1_+_145211087.23-P1P2	GACTACAGGCAGCAGTGTAT	1	Casc1_+_145211039.23-P1P2	GCGGGGCATCAGGCGGAAAT	2	Casc1_+_145211087.23-P1P2|Casc1_+_145211039.23-P1P2
Dcaf15	P1P2	Dcaf15_+_84104854.23-P1P2	GGGGAAGCGACAAGGAATGC	1	Dcaf15_+_84104977.23-P1P2	GTGGCCGAGGAGCGCCAAAG	2	Dcaf15_+_84104854.23-P1P2|Dcaf15_+_84104977.23-P1P2
Pip5k1a	P1P2	Pip5k1a_-_95107019.23-P1P2	GGTAGACCGTGAGTCTACGG	1	Pip5k1a_+_95106992.23-P1P2	GTAGACTCACGGTCTACGGT	2	Pip5k1a_-_95107019.23-P1P2|Pip5k1a_+_95106992.23-P1P2
Rac2	P1P2	Rac2_-_78572903.23-P1P2	GCACCAAGGGCACTTGACTT	1	Rac2_+_78572854.23-P1P2	GGCCCAACCTAGCACCTGTG	2	Rac2_-_78572903.23-P1P2|Rac2_+_78572854.23-P1P2
Dbx2	P1P2	Dbx2_-_95654881.23-P1P2	GGGCGTGGAGGGGACGGAAA	1	Dbx2_+_95654959.23-P1P2	GCGACCAAGTACATGTACCC	2	Dbx2_-_95654881.23-P1P2|Dbx2_+_95654959.23-P1P2
Ndufv3	P1P2	Ndufv3_-_31519976.23-P1P2	GTGGGCAGGCCCAAATCGGA	1	Ndufv3_-_31520100.23-P1P2	GAATGCGCGCGCAAACGCTT	2	Ndufv3_-_31519976.23-P1P2|Ndufv3_-_31520100.23-P1P2
Olfr1299	ENSMUST00000099610.2	Olfr1299_-_111664043.23-ENSMUST00000099610.2	GCTTCCACAGAAGTTAACAG	1	Olfr1299_+_111664025.23-ENSMUST00000099610.2	GGAGCCACTGTTAACTTCTG	2	Olfr1299_-_111664043.23-ENSMUST00000099610.2|Olfr1299_+_111664025.23-ENSMUST00000099610.2
Obox3	ENSMUST00000173912.1	Obox3_-_15640326.23-ENSMUST00000173912.1	Gatttaaccacaggatttca	1	Obox3_+_15640083.23-ENSMUST00000173912.1	Gaaagacccagggtgtgggg	2	Obox3_-_15640326.23-ENSMUST00000173912.1|Obox3_+_15640083.23-ENSMUST00000173912.1
Lhfpl1	P1P2	Lhfpl1_+_145349017.23-P1P2	GTCAAGTGCCTGCATGTCAG	1	Lhfpl1_+_145349073.23-P1P2	GTGGGATGTGGGTGGTGAAA	2	Lhfpl1_+_145349017.23-P1P2|Lhfpl1_+_145349073.23-P1P2
Rcsd1	P1P2	Rcsd1_+_165708273.23-P1P2	GGCGCTGCCCAGCCCATGTT	1	Rcsd1_+_165708244.23-P1P2	GAATGGAGTCGTGGCGGCTC	2	Rcsd1_+_165708273.23-P1P2|Rcsd1_+_165708244.23-P1P2
Ip6k3	P1P2	Ip6k3_-_27167828.23-P1P2	GGGAAACCACCTGACCCTCT	1	Ip6k3_-_27167852.23-P1P2	GTGAATGCCCAGCTGTCAGC	2	Ip6k3_-_27167828.23-P1P2|Ip6k3_-_27167852.23-P1P2
Serac1	P1P2	Serac1_-_6079911.23-P1P2	GCCTCTGCGCGCCTAGAAAA	1	Serac1_+_6079971.23-P1P2	GGGCCCGCCCACAGGACCGA	2	Serac1_-_6079911.23-P1P2|Serac1_+_6079971.23-P1P2
Col1a1	P2	Col1a1_+_94937408.23-P2	GGGCGGGGCTACAATGTGGA	1	Col1a1_+_94937412.23-P2	GAATGGGCGGGGCTACAATG	2	Col1a1_+_94937408.23-P2|Col1a1_+_94937412.23-P2
Akap10	P1P2	Akap10_+_61930319.23-P1P2	GCGAGGACGCCAGGTCACGT	1	Akap10_+_61930351.23-P1P2	GCCGAAGCCTCCAGGGGGAA	2	Akap10_+_61930319.23-P1P2|Akap10_+_61930351.23-P1P2
Slc7a11	P1P2	Slc7a11_+_50443869.23-P1P2	GCGGAGCTGCTTAAAGTCAC	1	Slc7a11_-_50443775.23-P1P2	GTAGCCTGTGGGTTGCTCAA	2	Slc7a11_+_50443869.23-P1P2|Slc7a11_-_50443775.23-P1P2
Unc13a	P1P2	Unc13a_+_71671925.23-P1P2	GGAAACGTGGAGACCTAGGT	1	Unc13a_+_71671896.23-P1P2	GCGGACAGAAATACTCATCG	2	Unc13a_+_71671925.23-P1P2|Unc13a_+_71671896.23-P1P2
Olfr616	ENSMUST00000106886.1	Olfr616_+_103565497.23-ENSMUST00000106886.1	GAGAGTGCTATGGAAGTCAA	1	Olfr616_+_103565673.23-ENSMUST00000106886.1	Gcatgggggcaacaagtcca	2	Olfr616_+_103565497.23-ENSMUST00000106886.1|Olfr616_+_103565673.23-ENSMUST00000106886.1
Faf2	P1P2	Faf2_+_54621713.23-P1P2	GTCTGCGCGCGCTAACTCGC	1	Faf2_-_54621681.23-P1P2	GACACGCGAACGTCGCCCTC	2	Faf2_+_54621713.23-P1P2|Faf2_-_54621681.23-P1P2
Vamp8	P1P2	Vamp8_+_72390577.23-P1P2	GGAGTCGCGGGATGGTCAGG	1	Vamp8_-_72390713.23-P1P2	GAAAGCTTAAGCAACAGGGT	2	Vamp8_+_72390577.23-P1P2|Vamp8_-_72390713.23-P1P2
Ms4a13	P1P2	Ms4a13_-_11196735.23-P1P2	GCAAGCCGCCGGGTTGTCAA	1	Ms4a13_-_11196788.23-P1P2	GAACCAGTGCGCAGACTCAC	2	Ms4a13_-_11196735.23-P1P2|Ms4a13_-_11196788.23-P1P2
Gm4884	ENSMUST00000164422.1	Gm4884_+_41032567.23-ENSMUST00000164422.1	GGATTGAGTGGGCAAGATCA	1	Gm4884_+_41032221.23-ENSMUST00000164422.1	GGTGACTATGTTGAAGGGCA	2	Gm4884_+_41032567.23-ENSMUST00000164422.1|Gm4884_+_41032221.23-ENSMUST00000164422.1
Cryba4	P1	Cryba4_-_112252674.23-P1	GGCTCTGCCTTTAGTGGGGA	1	Cryba4_-_112252714.23-P1	GGTCAGCACTAGGGAATATG	2	Cryba4_-_112252674.23-P1|Cryba4_-_112252714.23-P1
Clp1	P1P2	Clp1_-_84727475.23-P1P2	GTGTGTGGGAAGACGACCGG	1	Clp1_+_84727422.23-P1P2	GGCTGCCCCGCCCACCTCCG	2	Clp1_-_84727475.23-P1P2|Clp1_+_84727422.23-P1P2
Pde5a	P1P2	Pde5a_-_122729992.23-P1P2	GGCGGCGCGCACACAAAGGG	1	Pde5a_+_122729914.23-P1P2	GCCAGAAGAGGGATGACCAG	2	Pde5a_-_122729992.23-P1P2|Pde5a_+_122729914.23-P1P2
Trub1	P1P2	Trub1_-_57452690.23-P1P2	GacacaTGCAGGTTATGGGG	1	Trub1_+_57452774.23-P1P2	GAATGCTCTTAGTCGTGAAG	2	Trub1_-_57452690.23-P1P2|Trub1_+_57452774.23-P1P2
Cst8	P1P2	Cst8_+_148798683.23-P1P2	GTGGGTCCAAGCTCTTCAGA	1	Cst8_-_148798747.23-P1P2	GAAGAGTACTACTATGAGGT	2	Cst8_+_148798683.23-P1P2|Cst8_-_148798747.23-P1P2
Gal3st3	P1P2	Gal3st3_+_5298237.23-P1P2	GgggccTGGCGGCTCAGAGG	1	Gal3st3_-_5297985.23-P1P2	GGTAGAGGTGGGAAGTACGG	2	Gal3st3_+_5298237.23-P1P2|Gal3st3_-_5297985.23-P1P2
Vmn2r60	ENSMUST00000166447.1	Vmn2r60_-_42116303.23-ENSMUST00000166447.1	GCCACAACTCTCATTGATAG	1	Vmn2r60_-_42116421.23-ENSMUST00000166447.1	GTATACCTATTGGGCGTCAT	2	Vmn2r60_-_42116303.23-ENSMUST00000166447.1|Vmn2r60_-_42116421.23-ENSMUST00000166447.1
Col27a1	P2	Col27a1_+_63213979.23-P2	GCCCAAGTCGGAGTGGGGGA	1	Col27a1_+_63213947.23-P2	GCTGTACGAGGCATCCTGCA	2	Col27a1_+_63213979.23-P2|Col27a1_+_63213947.23-P2
Zfp367	P1P2	Zfp367_-_64153302.23-P1P2	GAGAGCCAATAGCCGGGTCC	1	Zfp367_-_64153275.23-P1P2	GGGCCACCGCGACGAGTGAC	2	Zfp367_-_64153302.23-P1P2|Zfp367_-_64153275.23-P1P2
Cd7	P1P2	Cd7_+_121039597.23-P1P2	GTGGGCCAGCCAACCAGCCA	1	Cd7_-_121039602.23-P1P2	GTGACCCCAACTGTCCTCCC	2	Cd7_+_121039597.23-P1P2|Cd7_-_121039602.23-P1P2
Coa3	P1P2	Coa3_-_101279480.23-P1P2	GTCAGGGAGACCCGGATCGT	1	Coa3_-_101279208.23-P1P2	GCGAGGGCAAACATATAGAA	2	Coa3_-_101279480.23-P1P2|Coa3_-_101279208.23-P1P2
Eng	P1P2	Eng_-_32646438.23-P1P2	GCACCAGCCAGCCTTGGCAA	1	Eng_-_32646464.23-P1P2	GTGGAGGGTGGGGTGCATGG	2	Eng_-_32646438.23-P1P2|Eng_-_32646464.23-P1P2
Gatsl3	P1P2	Gatsl3_-_4218086.23-P1P2	GGAAGGACTCAGATGGGTGA	1	Gatsl3_-_4218104.23-P1P2	GAGGGCTAGAAGAGTGGCTT	2	Gatsl3_-_4218086.23-P1P2|Gatsl3_-_4218104.23-P1P2
Gdf3	P1P2	Gdf3_+_122610148.23-P1P2	GCCAACCCGCGGGGAGTAGA	1	Gdf3_+_122610157.23-P1P2	GCACTGCTGACCAACCCGCG	2	Gdf3_+_122610148.23-P1P2|Gdf3_+_122610157.23-P1P2
Olfr1133	ENSMUST00000099855.1	Olfr1133_+_87646615.23-ENSMUST00000099855.1	GACACTGAGGAATGCTCTAT	1	Olfr1133_-_87646576.23-ENSMUST00000099855.1	GAATAAGCATAATTAAGTAG	2	Olfr1133_+_87646615.23-ENSMUST00000099855.1|Olfr1133_-_87646576.23-ENSMUST00000099855.1
Zbtb9	P1P2	Zbtb9_-_26973106.23-P1P2	GCGCACAGCCAATGAGGAGA	1	Zbtb9_+_26973011.23-P1P2	GAGTTCTGGAGTAGCAGTGA	2	Zbtb9_-_26973106.23-P1P2|Zbtb9_+_26973011.23-P1P2
Snrnp70	P1P2	Snrnp70_-_45395694.23-P1P2	GTCAGCTCGCGACCAGAACT	1	Snrnp70_+_45395907.23-P1P2	GAGTGTCTCGCGGTCATAGG	2	Snrnp70_-_45395694.23-P1P2|Snrnp70_+_45395907.23-P1P2
Olfr843	ENSMUST00000061365.2	Olfr843_+_19249654.23-ENSMUST00000061365.2	GGTATAAGAGATATGAGGAC	1	Olfr843_+_19249925.23-ENSMUST00000061365.2	GAGTCAACAGAATTGATAGC	2	Olfr843_+_19249654.23-ENSMUST00000061365.2|Olfr843_+_19249925.23-ENSMUST00000061365.2
Cdk18	P1P2	Cdk18_+_132139860.23-P1P2	GTCACCCTGTACTTAGTTTA	1	Cdk18_-_132139878.23-P1P2	GTGGCCCTAAACTAAGTACA	2	Cdk18_+_132139860.23-P1P2|Cdk18_-_132139878.23-P1P2
Kmt2c	P1P2	Kmt2c_+_25499266.23-P1P2	GGGAGAGCGGGCAAACGATA	1	Kmt2c_+_25498888.23-P1P2	Gcccgctcggcgccgccctc	2	Kmt2c_+_25499266.23-P1P2|Kmt2c_+_25498888.23-P1P2
Rps9	P1P2	Rps9_+_3703812.23-P1P2	GAACGAGGCTGCCCCTTCCA	1	Rps9_+_3703864.23-P1P2	GAGGTGGTTAGGCGATTAAA	2	Rps9_+_3703812.23-P1P2|Rps9_+_3703864.23-P1P2
Pibf1	P1P2	Pibf1_+_99099410.23-P1P2	GGGGCCGCGTGGTGACGAGG	1	Pibf1_-_99099697.23-P1P2	GGCCTCGCGGCGTGGGATCC	2	Pibf1_+_99099410.23-P1P2|Pibf1_-_99099697.23-P1P2
Syce3	P1P2	Syce3_+_89410538.23-P1P2	GTACCCGAGGCACGTAAGAA	1	Syce3_+_89410397.23-P1P2	GCAAACCCCAGGGTAAGACC	2	Syce3_+_89410538.23-P1P2|Syce3_+_89410397.23-P1P2
Fam187b	P2	Fam187b_+_30973666.23-P2	GCAGGTGGAGCACGCCCAGA	1	Fam187b_-_30973525.23-P2	GGGCCTCCCTCCCCGGAAGT	2	Fam187b_+_30973666.23-P2|Fam187b_-_30973525.23-P2
Drd1a	P1P2	Drd1a_-_54055836.23-P1P2	GTGTGTGTAACCAAGATGCA	1	Drd1a_-_54055789.23-P1P2	GACCCCGCCTGCGCCCTAGC	2	Drd1a_-_54055836.23-P1P2|Drd1a_-_54055789.23-P1P2
Cfl1	P1P2	Cfl1_+_5490349.23-P1P2	GTGAGGCGCAGAGTAGGCGG	1	Cfl1_+_5490335.23-P1P2	GGGCGGAGGCCGAGAGGCGT	2	Cfl1_+_5490349.23-P1P2|Cfl1_+_5490335.23-P1P2
U2af2	P1P2	U2af2_-_5061691.23-P1P2	GAAGGGGCGGAGTGACCCTG	1	U2af2_-_5062071.23-P1P2	GCCGTCCGAGAACAGCCGAC	2	U2af2_-_5061691.23-P1P2|U2af2_-_5062071.23-P1P2
Map3k10	P1P2	Map3k10_-_27674602.23-P1P2	GTCCCCGCCGGGGCTCTTGG	1	Map3k10_+_27674576.23-P1P2	GAAGAGCCCCGGCGGGGAGA	2	Map3k10_-_27674602.23-P1P2|Map3k10_+_27674576.23-P1P2
Tmem178	P1P2	Tmem178_-_80944510.23-P1P2	Gggaaagtgagagcgcggga	1	Tmem178_-_80944541.23-P1P2	Ggggcgggaggaggctcccg	2	Tmem178_-_80944510.23-P1P2|Tmem178_-_80944541.23-P1P2
Pde4dip	ENSMUST00000045243.8	Pde4dip_+_97768100.23-ENSMUST00000045243.8	GCTAGCAGGCGAGAATGGAT	1	Pde4dip_+_97768293.23-ENSMUST00000045243.8	GACCGTAGACAGACAGGGAG	2	Pde4dip_+_97768100.23-ENSMUST00000045243.8|Pde4dip_+_97768293.23-ENSMUST00000045243.8
Ddr1	P2	Ddr1_+_35704114.23-P2	GGTCCCCTCCCTCTCTGCGG	1	Ddr1_-_35704176.23-P2	GGAGGGGAGGCTGAGAACTA	2	Ddr1_+_35704114.23-P2|Ddr1_-_35704176.23-P2
Vmn2r22	ENSMUST00000170808.1	Vmn2r22_+_123651105.23-ENSMUST00000170808.1	GGCCCTTCCCCTCACAATCA	1	Vmn2r22_+_123650985.23-ENSMUST00000170808.1	GCATAGTGTACATACTCCAC	2	Vmn2r22_+_123651105.23-ENSMUST00000170808.1|Vmn2r22_+_123650985.23-ENSMUST00000170808.1
Tnfsf11	P1P2	Tnfsf11_+_78308207.23-P1P2	GCACCTCAGAGGGCCCTGAT	1	Tnfsf11_+_78308158.23-P1P2	GAAGAAGAGTGGGAGGGCGA	2	Tnfsf11_+_78308207.23-P1P2|Tnfsf11_+_78308158.23-P1P2
Kalrn	P1P2	Kalrn_-_34096156.23-P1P2	GTCCCTGAGCCTTATGAAAC	1	Kalrn_-_34096129.23-P1P2	GTGTTGGTTGGGGACACAGT	2	Kalrn_-_34096156.23-P1P2|Kalrn_-_34096129.23-P1P2
1700013D24Rik	P1P2	1700013D24Rik_-_124357121.23-P1P2	GAGAGACAATGGGTGAGATG	1	1700013D24Rik_-_124357132.23-P1P2	GGTGAGATGAGGATCTGATT	2	1700013D24Rik_-_124357121.23-P1P2|1700013D24Rik_-_124357132.23-P1P2
Fgf14	ENSMUST00000026631.5	Fgf14_+_124193178.23-ENSMUST00000026631.5	GtgtgtAGACACATCGGATG	1	Fgf14_+_124193164.23-ENSMUST00000026631.5	GGGATGGGGACCACATAGTT	2	Fgf14_+_124193178.23-ENSMUST00000026631.5|Fgf14_+_124193164.23-ENSMUST00000026631.5
Spdyb	P1P2	Spdyb_+_143226030.23-P1P2	GGGAGAATGGTCTTGGAAAA	1	Spdyb_+_143226011.23-P1P2	GGGGATGAGTGTAAGAGACA	2	Spdyb_+_143226030.23-P1P2|Spdyb_+_143226011.23-P1P2
Agap2	P1P2	Agap2_+_127078986.23-P1P2	GAGGGGAGGGGCGTGGATCC	1	Agap2_-_127078543.23-P1P2	GAGGGAGCTGGGTGATGAGA	2	Agap2_+_127078986.23-P1P2|Agap2_-_127078543.23-P1P2
Wdr77	P1P2	Wdr77_+_105959331.23-P1P2	GTCTCGCGATAGTGGGGAGG	1	Wdr77_-_105959421.23-P1P2	GCCGCTGCGGGGACAGGAGA	2	Wdr77_+_105959331.23-P1P2|Wdr77_-_105959421.23-P1P2
Cyp2a4	P1P2	Cyp2a4_-_26307101.23-P1P2	GAAACTTGGTGCACAATAGT	1	Cyp2a4_-_26306692.23-P1P2	GGGgtcgggtgtggtagtat	2	Cyp2a4_-_26307101.23-P1P2|Cyp2a4_-_26306692.23-P1P2
Trp53rk	P2	Trp53rk_-_166792352.23-P2	GTCACTGAAAGGTTTGAACC	1	Trp53rk_-_166792238.23-P2	GCAGAGAATAGGAGATAGTT	2	Trp53rk_-_166792352.23-P2|Trp53rk_-_166792238.23-P2
Ints2	P1P2	Ints2_+_86257637.23-P1P2	GGAAGCGGGGAGGGCGGTGA	1	Ints2_+_86257628.23-P1P2	GAGGGCGGTGACGGAGGAAG	2	Ints2_+_86257637.23-P1P2|Ints2_+_86257628.23-P1P2
Luzp2	P1P2	Luzp2_+_54835515.23-P1P2	GAGGGTGAGAGACAATTCGC	1	Luzp2_+_54835408.23-P1P2	GGCTCTGATTAGAGGCATAA	2	Luzp2_+_54835515.23-P1P2|Luzp2_+_54835408.23-P1P2
Krt6a	P1P2	Krt6a_+_101694620.23-P1P2	GCACACAGGGAGTGTCTACA	1	Krt6a_+_101694633.23-P1P2	GTGTGGTGAGGGGGCACACA	2	Krt6a_+_101694620.23-P1P2|Krt6a_+_101694633.23-P1P2
Scn10a	P1P2	Scn10a_-_119719360.23-P1P2	GTGCCCGTCCTTAGCAGGAT	1	Scn10a_+_119719341.23-P1P2	GAGCCCATCCTGCTAAGGAC	2	Scn10a_-_119719360.23-P1P2|Scn10a_+_119719341.23-P1P2
Ugt2a1	P1P2	Ugt2a1_-_87490933.23-P1P2	GTAGACAAGGTGATAGGATG	1	Ugt2a1_-_87490927.23-P1P2	GTCTTGCTAGACAAGGTGAT	2	Ugt2a1_-_87490933.23-P1P2|Ugt2a1_-_87490927.23-P1P2
Vmn1r233	ENSMUST00000056339.1	Vmn1r233_+_20994904.23-ENSMUST00000056339.1	GTTATGCCTGTAGTGTTAAG	1	Vmn1r233_+_20994721.23-ENSMUST00000056339.1	GGTATTCTGTGATACACTAC	2	Vmn1r233_+_20994904.23-ENSMUST00000056339.1|Vmn1r233_+_20994721.23-ENSMUST00000056339.1
Mageh1	P1P2	Mageh1_-_153037670.23-P1P2	GTAGCCGAAAGGAAAAGGAG	1	Mageh1_-_153037757.23-P1P2	GCCTGCGCGCAAGAGAATGT	2	Mageh1_-_153037670.23-P1P2|Mageh1_-_153037757.23-P1P2
Trim2	P2	Trim2_+_84259896.23-P2	GAACGCCCGGCGGTGGAGGC	1	Trim2_+_84259900.23-P2	GACCGAACGCCCGGCGGTGG	2	Trim2_+_84259896.23-P2|Trim2_+_84259900.23-P2
Mtx1	P1P2	Mtx1_+_89214286.23-P1P2	GCCCCCGCGGCGTCCGCTCA	1	Mtx1_+_89214095.23-P1P2	GCGGCCCTGCTCCCTTACGG	2	Mtx1_+_89214286.23-P1P2|Mtx1_+_89214095.23-P1P2
Wdr89	P1P2	Wdr89_-_75669678.23-P1P2	GCTACCTTCCGATTGGACGA	1	Wdr89_-_75669622.23-P1P2	GAGGCCGGACCATAACCAGC	2	Wdr89_-_75669678.23-P1P2|Wdr89_-_75669622.23-P1P2
Pank1	P1P2	Pank1_+_34877984.23-P1P2	GGGAACGGTGTGGACCAATG	1	Pank1_+_34877999.23-P1P2	GGACACCATGTGGGCCGGAA	2	Pank1_+_34877984.23-P1P2|Pank1_+_34877999.23-P1P2
BC049702	ENSMUST00000089246.5	BC049702_-_19481439.23-ENSMUST00000089246.5	GTGCTTGAACCAAAATGCAG	1	BC049702_+_19481354.23-ENSMUST00000089246.5	GTGTTAATCTCTTGTGTGGG	2	BC049702_-_19481439.23-ENSMUST00000089246.5|BC049702_+_19481354.23-ENSMUST00000089246.5
Cpxm2	P1P2	Cpxm2_+_132154818.23-P1P2	GAGGCCCTGGGCGGGTAGGA	1	Cpxm2_-_132154805.23-P1P2	GcccaggagaggctaggcgC	2	Cpxm2_+_132154818.23-P1P2|Cpxm2_-_132154805.23-P1P2
Smr3a	P1P2	Smr3a_+_88002534.23-P1P2	GTTTGAGGGGTGGAAGACTA	1	Smr3a_+_88002290.23-P1P2	GGTTTCAGATAAATACAGGG	2	Smr3a_+_88002534.23-P1P2|Smr3a_+_88002290.23-P1P2
Adap1	P1P2	Adap1_-_139325670.23-P1P2	GAACCCGCGCTGCGGAAGGA	1	Adap1_+_139325849.23-P1P2	GAGGGAGCGGGCCAGAGATC	2	Adap1_-_139325670.23-P1P2|Adap1_+_139325849.23-P1P2
Adcyap1r1	P1P2	Adcyap1r1_+_55451907.23-P1P2	GTAGGCCGGGGGCAGAGATG	1	Adcyap1r1_-_55451953.23-P1P2	GCCGCCCCCCGGGCTCTCAT	2	Adcyap1r1_+_55451907.23-P1P2|Adcyap1r1_-_55451953.23-P1P2
Fh1	P1P2	Fh1_-_175625799.23-P1P2	GCTAGTGCGGAAGGAATCAT	1	Fh1_-_175625786.23-P1P2	GGGTTCACGGGAAACTAGTG	2	Fh1_-_175625799.23-P1P2|Fh1_-_175625786.23-P1P2
Alkbh3	P1P2	Alkbh3_-_94010954.23-P1P2	GGGAGTCAGGGGCACATGTG	1	Alkbh3_-_94010928.23-P1P2	GAAGGGAATATGGTCGGAAT	2	Alkbh3_-_94010954.23-P1P2|Alkbh3_-_94010928.23-P1P2
Ptgds	P1P2	Ptgds_+_25470121.23-P1P2	GGGGTCATGGGACTTGGAGA	1	Ptgds_+_25469249.23-P1P2	GCAGCCTGCTAGAAAGGGAG	2	Ptgds_+_25470121.23-P1P2|Ptgds_+_25469249.23-P1P2
Kcnn2	ENSMUST00000183850.1,ENSMUST00000066890.7	Kcnn2_+_45268949.23-ENSMUST00000183850.1,ENSMUST00000066890.7	GCGGGAGAGCACTGGTGGAC	1	Kcnn2_+_45268943.23-ENSMUST00000183850.1,ENSMUST00000066890.7	GAGCACTGGTGGACGGGCGG	2	Kcnn2_+_45268949.23-ENSMUST00000183850.1,ENSMUST00000066890.7|Kcnn2_+_45268943.23-ENSMUST00000183850.1,ENSMUST00000066890.7
Pttg1	P1P2	Pttg1_+_43426466.23-P1P2	GTGGGTGAGTACCTTCTCGC	1	Pttg1_-_43426276.23-P1P2	GGGTCCCTCCGAGAGGAGGT	2	Pttg1_+_43426466.23-P1P2|Pttg1_-_43426276.23-P1P2
Rab27a	P1P2	Rab27a_+_73044704.23-P1P2	GGCCTCGCCTGGCACGGATC	1	Rab27a_-_73044772.23-P1P2	GCCTGCGGGCAGGTGACAGG	2	Rab27a_+_73044704.23-P1P2|Rab27a_-_73044772.23-P1P2
Ubr4	P2	Ubr4_+_139352411.23-P2	GAGCGCAGGCGGGGAAGAGA	1	Ubr4_-_139352451.23-P2	GGCTCCGCCCAGTGTCCTGA	2	Ubr4_+_139352411.23-P2|Ubr4_-_139352451.23-P2
Lamtor4	P1P2	Lamtor4_-_138255657.23-P1P2	GGGAAAGCGGGGCTCCGCAG	1	Lamtor4_-_138255575.23-P1P2	GACACTGCCCCGCGACTCTC	2	Lamtor4_-_138255657.23-P1P2|Lamtor4_-_138255575.23-P1P2
Plk2	P1P2	Plk2_+_110394906.23-P1P2	GGTGGCCGCCTGGATGTCGT	1	Plk2_+_110394939.23-P1P2	GGGCCCCGGAGTCCGCGCTG	2	Plk2_+_110394906.23-P1P2|Plk2_+_110394939.23-P1P2
Nedd1	P1P2	Nedd1_-_92722511.23-P1P2	GCCACCCTGGGGCGGTGCAG	1	Nedd1_+_92722524.23-P1P2	GATAAAGGAGCAGTAGCTAC	2	Nedd1_-_92722511.23-P1P2|Nedd1_+_92722524.23-P1P2
Umod	P1P2	Umod_+_119479232.23-P1P2	GGAAGCAGAGAATAATCTGA	1	Umod_+_119479257.23-P1P2	GCCCACAGAAACAATCTCAG	2	Umod_+_119479232.23-P1P2|Umod_+_119479257.23-P1P2
H1f0	P1P2	H1f0_-_79028277.23-P1P2	GGGGCAGAGACCTCGAGAGA	1	H1f0_-_79028251.23-P1P2	GTCCCCAGAAGGGAAGCCTA	2	H1f0_-_79028277.23-P1P2|H1f0_-_79028251.23-P1P2
Olfr26	ENSMUST00000104874.2	Olfr26_-_38854859.23-ENSMUST00000104874.2	GAACTGGGAGACAAGTTTGA	1	Olfr26_-_38855010.23-ENSMUST00000104874.2	GAGAACAGGTATGCTCATAT	2	Olfr26_-_38854859.23-ENSMUST00000104874.2|Olfr26_-_38855010.23-ENSMUST00000104874.2
Sypl	P1P2	Sypl_+_32954139.23-P1P2	Ggacgaaggggcatcggggc	1	Sypl_+_32954135.23-P1P2	Gaaggggcatcggggcggga	2	Sypl_+_32954139.23-P1P2|Sypl_+_32954135.23-P1P2
Olfr617	ENSMUST00000048265.4	Olfr617_-_103583845.23-ENSMUST00000048265.4	GACACACTCCAGAGCATCTG	1	Olfr617_-_103583805.23-ENSMUST00000048265.4	GGAACATCAGAACTTAATAG	2	Olfr617_-_103583845.23-ENSMUST00000048265.4|Olfr617_-_103583805.23-ENSMUST00000048265.4
Tmem210	P1P2	Tmem210_+_25287927.23-P1P2	GCCTGAGTCAGGGGATATTA	1	Tmem210_+_25287969.23-P1P2	GTGGAGCAGGTAAAGGGGAC	2	Tmem210_+_25287927.23-P1P2|Tmem210_+_25287969.23-P1P2
Rbm45	P1P2	Rbm45_-_76369944.23-P1P2	GGGGCGCTGCAGAATGTTCC	1	Rbm45_+_76369910.23-P1P2	GGCAGCGCCCCCTGGTGCCA	2	Rbm45_-_76369944.23-P1P2|Rbm45_+_76369910.23-P1P2
Foxp3	P1P2	Foxp3_+_7579546.23-P1P2	GTGTGCTGATAATTGCAGGG	1	Foxp3_+_7579271.23-P1P2	GCACAAAGGCATCCCGAGGC	2	Foxp3_+_7579546.23-P1P2|Foxp3_+_7579271.23-P1P2
Gpr15	P1P2	Gpr15_-_58718943.23-P1P2	GAGCACCCTGTGATTGGTAT	1	Gpr15_+_58718926.23-P1P2	GACAGCCAATACCAATCACA	2	Gpr15_-_58718943.23-P1P2|Gpr15_+_58718926.23-P1P2
Fblim1	P1	Fblim1_+_141600072.23-P1	GCCCCTCCCCGGTGCACCGT	1	Fblim1_-_141600092.23-P1	GCCCCACGGTGCACCGGGGA	2	Fblim1_+_141600072.23-P1|Fblim1_-_141600092.23-P1
Adh6b	P1P2	Adh6b_-_138352233.23-P1P2	GTCTACTGCCTCTACCCTAA	1	Adh6b_+_138352225.23-P1P2	GCTCACAGAAGTTGCCCTTA	2	Adh6b_-_138352233.23-P1P2|Adh6b_+_138352225.23-P1P2
Tuba3b	P1P2	Tuba3b_+_145615816.23-P1P2	GAGGGGAGAGAACTTAGGAT	1	Tuba3b_+_145615783.23-P1P2	GTCTGCGCATCCCTGACATC	2	Tuba3b_+_145615816.23-P1P2|Tuba3b_+_145615783.23-P1P2
Minpp1	P1P2	Minpp1_+_32485814.23-P1P2	GAGAAGGCAAGCGTGGTCTC	1	Minpp1_-_32485817.23-P1P2	GACTCGCTCGGTGACAGCAC	2	Minpp1_+_32485814.23-P1P2|Minpp1_-_32485817.23-P1P2
Tnfsf13	P1P2	Tnfsf13_-_69685588.23-P1P2	GCGGCCCCTAAGTTGGAGGA	1	Tnfsf13_+_69685435.23-P1P2	GTGTCACTAGCTCGACCCTG	2	Tnfsf13_-_69685588.23-P1P2|Tnfsf13_+_69685435.23-P1P2
Ndufs1	P1P2	Ndufs1_+_63177137.23-P1P2	GAGGCCGCGGCCAGCGCTGA	1	Ndufs1_+_63177173.23-P1P2	GGGGAGCTGTGCAAAAGCGG	2	Ndufs1_+_63177137.23-P1P2|Ndufs1_+_63177173.23-P1P2
Gak	P1P2	Gak_-_108629905.23-P1P2	GCCTAGGAGGCACGGAGGTA	1	Gak_-_108629892.23-P1P2	GCGGACCTCAAGCTCCTAGG	2	Gak_-_108629905.23-P1P2|Gak_-_108629892.23-P1P2
Ppid	P1P2	Ppid_-_79591311.23-P1P2	GAGGGGCCAGGCGCAGAAAC	1	Ppid_-_79591186.23-P1P2	Gtcgtggcagagtcgaggct	2	Ppid_-_79591311.23-P1P2|Ppid_-_79591186.23-P1P2
Rccd1	P1P2	Rccd1_+_80324292.23-P1P2	GCAACCGCGTCCACTGCTGT	1	Rccd1_-_80324249.23-P1P2	GCTGACCGGCACACATGCGC	2	Rccd1_+_80324292.23-P1P2|Rccd1_-_80324249.23-P1P2
Exosc2	P1P2	Exosc2_+_31670597.23-P1P2	GAAGTTAACTCGTGGAAGTG	1	Exosc2_+_31670654.23-P1P2	GGAGAAGCGACCAATGGGAA	2	Exosc2_+_31670597.23-P1P2|Exosc2_+_31670654.23-P1P2
Lrrc70	ENSMUST00000057427.4	Lrrc70_-_106847791.23-ENSMUST00000057427.4	GaagacaggggcttgttcAA	1	Lrrc70_-_106847439.23-ENSMUST00000057427.4	GCCCATGACAGCAAGATAAA	2	Lrrc70_-_106847791.23-ENSMUST00000057427.4|Lrrc70_-_106847439.23-ENSMUST00000057427.4
Rapgef6	P1P2	Rapgef6_+_54522785.23-P1P2	GGGCCGTGACGTAGAGAGAT	1	Rapgef6_-_54522711.23-P1P2	GCAACCGGAAGCTGGGTATG	2	Rapgef6_+_54522785.23-P1P2|Rapgef6_-_54522711.23-P1P2
Fance	P1P2	Fance_+_28313407.23-P1P2	GCGGAGCGGGGACGGAGCGA	1	Fance_+_28313400.23-P1P2	GGGGACGGAGCGAGGGCATC	2	Fance_+_28313407.23-P1P2|Fance_+_28313400.23-P1P2
Caln1	ENSMUST00000111287.1	Caln1_-_130447523.23-ENSMUST00000111287.1	GGAAAAGATAGGACTATCGT	1	Caln1_-_130447645.23-ENSMUST00000111287.1	GGAGGGGACCCTGATTAACT	2	Caln1_-_130447523.23-ENSMUST00000111287.1|Caln1_-_130447645.23-ENSMUST00000111287.1
Olfr506	ENSMUST00000077343.2	Olfr506_+_108611913.23-ENSMUST00000077343.2	GGTGTGCTATGGACTAATAA	1	Olfr506_-_108612035.23-ENSMUST00000077343.2	GCTTACTTATAAAACCACAG	2	Olfr506_+_108611913.23-ENSMUST00000077343.2|Olfr506_-_108612035.23-ENSMUST00000077343.2
Rarres2	P1P2	Rarres2_-_48572864.23-P1P2	GGAGCACCAAATGAGACTGC	1	Rarres2_+_48573006.23-P1P2	GGAAAGACTGGGTTGGGACT	2	Rarres2_-_48572864.23-P1P2|Rarres2_+_48573006.23-P1P2
Ppp1r7	P1P2	Ppp1r7_+_93343519.23-P1P2	GCGCGGGCGCAGTGTTTCAT	1	Ppp1r7_+_93343478.23-P1P2	GTCCGGCTCCACCTGGGTTA	2	Ppp1r7_+_93343519.23-P1P2|Ppp1r7_+_93343478.23-P1P2
Nppa	P1P2	Nppa_-_148000576.23-P1P2	GTGGAGCTGCTCAAGGCAAA	1	Nppa_-_148000440.23-P1P2	GAATCCTGAGGCGAGCGCCC	2	Nppa_-_148000576.23-P1P2|Nppa_-_148000440.23-P1P2
2310030G06Rik	P1P2	2310030G06Rik_+_50746636.23-P1P2	GTGGCTGCGAACAGTCACTT	1	2310030G06Rik_+_50746854.23-P1P2	GTGTGGTAGGGCAAACGTAG	2	2310030G06Rik_+_50746636.23-P1P2|2310030G06Rik_+_50746854.23-P1P2
Smarcad1	P1P2	Smarcad1_+_65042527.23-P1P2	GTCTGAGCGCGCCGTTGTCA	1	Smarcad1_-_65042475.23-P1P2	GTGTAGCCGGCGCGGTGAAA	2	Smarcad1_+_65042527.23-P1P2|Smarcad1_-_65042475.23-P1P2
Lig1	P1P2	Lig1_+_13278610.23-P1P2	GAGGTCGTAAGGGTGACAGT	1	Lig1_+_13278620.23-P1P2	GTGAGCCTGCGAGGTCGTAA	2	Lig1_+_13278610.23-P1P2|Lig1_+_13278620.23-P1P2
Crtc3	P1P2	Crtc3_-_80689022.23-P1P2	GCCTCCGGCGAGCCGACCGA	1	Crtc3_+_80688988.23-P1P2	GCGCCGGAGGTCGAGCTCCC	2	Crtc3_-_80689022.23-P1P2|Crtc3_+_80688988.23-P1P2
Nadk	P1P2	Nadk_+_155563626.23-P1P2	Ggcgaggcaaaggggaggcg	1	Nadk_+_155563634.23-P1P2	Gagggaggggcgaggcaaag	2	Nadk_+_155563626.23-P1P2|Nadk_+_155563634.23-P1P2
Olfr1490	ENSMUST00000080162.1	Olfr1490_-_13654178.23-ENSMUST00000080162.1	GaaaaaGTCAAGTccagtac	1	Olfr1490_+_13653945.23-ENSMUST00000080162.1	GAATCACTCCAAGTGTGATA	2	Olfr1490_-_13654178.23-ENSMUST00000080162.1|Olfr1490_+_13653945.23-ENSMUST00000080162.1
Rps7	P1P2	Rps7_+_28636110.23-P1P2	GCTGCCCAGGTCTCCAACTA	1	Rps7_-_28636034.23-P1P2	GTCCCTACTGGGAACTAATG	2	Rps7_+_28636110.23-P1P2|Rps7_-_28636034.23-P1P2
Arhgef1	P2	Arhgef1_+_24904244.23-P2	GTGGCCCGATAGGGCCGCTC	1	Arhgef1_-_24904220.23-P2	GGACAGGGGCAGTCGAAATA	2	Arhgef1_+_24904244.23-P2|Arhgef1_-_24904220.23-P2
Bpifb9a	ENSMUST00000088924.5	Bpifb9a_-_154257417.23-ENSMUST00000088924.5	GCCCACTGGCATCTCACTTG	1	Bpifb9a_+_154257662.23-ENSMUST00000088924.5	GAGCAGATCTTTTGATGGCA	2	Bpifb9a_-_154257417.23-ENSMUST00000088924.5|Bpifb9a_+_154257662.23-ENSMUST00000088924.5
Myl10	P2	Myl10_-_136697614.23-P2	GGGCCACTCAGAGACAGGTG	1	Myl10_-_136697708.23-P2	GTCAAAATAAATTTggtctg	2	Myl10_-_136697614.23-P2|Myl10_-_136697708.23-P2
Slc5a12	P1P2	Slc5a12_+_110597126.23-P1P2	GGGCATCTGTCTCCTGACTA	1	Slc5a12_-_110597054.23-P1P2	GTGATGTGGGCAAAGGTCTC	2	Slc5a12_+_110597126.23-P1P2|Slc5a12_-_110597054.23-P1P2
Smndc1	P1P2	Smndc1_-_53390731.23-P1P2	GGGAGCGGGTGTGGTCTGAT	1	Smndc1_-_53390717.23-P1P2	GCAGCCTCGGAAGGCGGAGC	2	Smndc1_-_53390731.23-P1P2|Smndc1_-_53390717.23-P1P2
Stk10	P1P2	Stk10_+_32533176.23-P1P2	GCGCCCCGAGACCCCTCAAT	1	Stk10_-_32533186.23-P1P2	GAGCTCCCGCAGCCAATTGA	2	Stk10_+_32533176.23-P1P2|Stk10_-_32533186.23-P1P2
Msh4	ENSMUST00000005630.4	Msh4_-_153906317.23-ENSMUST00000005630.4	GTACGGGACAGAGCACAACA	1	Msh4_+_153906228.23-ENSMUST00000005630.4	GGGGCACATGCTGTGTACTG	2	Msh4_-_153906317.23-ENSMUST00000005630.4|Msh4_+_153906228.23-ENSMUST00000005630.4
Tada2a	P1P2	Tada2a_-_84129822.23-P1P2	GGGCCCGGTGGCATGTGCTA	1	Tada2a_-_84129756.23-P1P2	GGTACCTGGCTGCTAGTCGG	2	Tada2a_-_84129822.23-P1P2|Tada2a_-_84129756.23-P1P2
Rnf32	P1P2	Rnf32_+_29195868.23-P1P2	GTCCGCCCGCGCTTACATCA	1	Rnf32_-_29195862.23-P1P2	GGACGCTGACGATACGCGAG	2	Rnf32_+_29195868.23-P1P2|Rnf32_-_29195862.23-P1P2
Coq3	P1P2	Coq3_-_21879467.23-P1P2	GACAGCACGGCGTGACTCGT	1	Coq3_-_21879480.23-P1P2	GACTCGTAGGACGAGAAGGT	2	Coq3_-_21879467.23-P1P2|Coq3_-_21879480.23-P1P2
Mrpl44	P1P2	Mrpl44_+_79776009.23-P1P2	GCGCTGGAGGACACCGAAGA	1	Mrpl44_+_79776025.23-P1P2	GCAGAGAGAGGCCTGAACGC	2	Mrpl44_+_79776009.23-P1P2|Mrpl44_+_79776025.23-P1P2
Fars2	P1P2	Fars2_+_36117591.23-P1P2	GGGGCCTAGGCAGGTGTAGG	1	Fars2_-_36117707.23-P1P2	GCTGCTGTGCACGAAAACGA	2	Fars2_+_36117591.23-P1P2|Fars2_-_36117707.23-P1P2
Ceacam13	P1P2	Ceacam13_-_18009772.23-P1P2	GTGTAGAGAACAGGAGATAG	1	Ceacam13_+_18009410.23-P1P2	Gaatctggagtgaagaactg	2	Ceacam13_-_18009772.23-P1P2|Ceacam13_+_18009410.23-P1P2
Dcaf4	P1	Dcaf4_+_83520439.23-P1	GTCAGTAGGGGCGGTCTTTA	1	Dcaf4_+_83520435.23-P1	GTAGGGGCGGTCTTTACGGA	2	Dcaf4_+_83520439.23-P1|Dcaf4_+_83520435.23-P1
Klra5	ENSMUST00000014683.6	Klra5_-_129913307.23-ENSMUST00000014683.6	GTCCTCTTTATCTAAGCAAA	1	Klra5_-_129913416.23-ENSMUST00000014683.6	GATAGACACTCCTACAGAGA	2	Klra5_-_129913307.23-ENSMUST00000014683.6|Klra5_-_129913416.23-ENSMUST00000014683.6
Ttc17	P2	Ttc17_+_94405201.23-P2	GCCCCTAGAAAAATACAGTA	1	Ttc17_+_94405109.23-P2	GTTGCTGAGGTCCGCGTGAA	2	Ttc17_+_94405201.23-P2|Ttc17_+_94405109.23-P2
Olfr137	ENSMUST00000057394.5	Olfr137_-_38305821.23-ENSMUST00000057394.5	Gtagctagtaagttttctaa	1	Olfr137_+_38305918.23-ENSMUST00000057394.5	Gttgaataacatgactataa	2	Olfr137_-_38305821.23-ENSMUST00000057394.5|Olfr137_+_38305918.23-ENSMUST00000057394.5
Olfr58	ENSMUST00000079660.3	Olfr58_-_19780104.23-ENSMUST00000079660.3	GGATTCTCCCTGAGGTAGGA	1	Olfr58_-_19779941.23-ENSMUST00000079660.3	GTTTTATCTGATATTTCATA	2	Olfr58_-_19780104.23-ENSMUST00000079660.3|Olfr58_-_19779941.23-ENSMUST00000079660.3
Ing1	P2	Ing1_-_11556376.23-P2	GccccggcccgggACGGTGA	1	Ing1_+_11556273.23-P2	GAGGGTCGCCGAGGGGACAG	2	Ing1_-_11556376.23-P2|Ing1_+_11556273.23-P2
Scgb2b2	P1P2	Scgb2b2_-_31302576.23-P1P2	GGAGAACATCAGGACATCTC	1	Scgb2b2_-_31302632.23-P1P2	GCTCCCTCCCCAGTTCAAGG	2	Scgb2b2_-_31302576.23-P1P2|Scgb2b2_-_31302632.23-P1P2
Nbas	P1P2	Nbas_+_13268984.23-P1P2	GCTAAACTTGACAGATCTGT	1	Nbas_+_13269063.23-P1P2	GGGACGCGGCCGCTGGTGAT	2	Nbas_+_13268984.23-P1P2|Nbas_+_13269063.23-P1P2
Nnat	P1P2	Nnat_-_157559927.23-P1P2	GCGGGCAGAGCAGAATCTTC	1	Nnat_+_157560026.23-P1P2	GTGGGGGATGTTGAGAAGGA	2	Nnat_-_157559927.23-P1P2|Nnat_+_157560026.23-P1P2
C1qtnf9	P1P2	C1qtnf9_-_60767963.23-P1P2	GCCTGGGCTGCTGTGAAGGG	1	C1qtnf9_+_60767885.23-P1P2	GGTGCCAGCAGGTGGAATGT	2	C1qtnf9_-_60767963.23-P1P2|C1qtnf9_+_60767885.23-P1P2
Cotl1	P1P2	Cotl1_+_119840735.23-P1P2	GGGGCTGGGGCCCACGGAGT	1	Cotl1_-_119840662.23-P1P2	GCGGCCAATCCCAGTCTGTG	2	Cotl1_+_119840735.23-P1P2|Cotl1_-_119840662.23-P1P2
Abi2	P1P2	Abi2_+_60409567.23-P1P2	GAGGACGGTCACCGCGGCGA	1	Abi2_+_60409635.23-P1P2	GACCCTACGGCGCGCGACGA	2	Abi2_+_60409567.23-P1P2|Abi2_+_60409635.23-P1P2
Pde4b	ENSMUST00000106908.2	Pde4b_-_102254738.23-ENSMUST00000106908.2	GTTAAAAGCACATGCTGGAT	1	Pde4b_-_102254616.23-ENSMUST00000106908.2	GCAGTGGAGGGTATTTTTCA	2	Pde4b_-_102254738.23-ENSMUST00000106908.2|Pde4b_-_102254616.23-ENSMUST00000106908.2
Igfbp5	P1P2	Igfbp5_+_72875067.23-P1P2	GAGGAGGAGGGCTCTGTGTA	1	Igfbp5_+_72875038.23-P1P2	GGGGAGCCCCCGTGTCTAGA	2	Igfbp5_+_72875067.23-P1P2|Igfbp5_+_72875038.23-P1P2
Olfr998	ENSMUST00000052307.2	Olfr998_+_85590410.23-ENSMUST00000052307.2	GGAAATGATTGTAGCTTCTG	1	Olfr998_-_85590337.23-ENSMUST00000052307.2	GATAACTACACAATCTTTGT	2	Olfr998_+_85590410.23-ENSMUST00000052307.2|Olfr998_-_85590337.23-ENSMUST00000052307.2
Slc9b2	P1P2	Slc9b2_-_135307554.23-P1P2	GGCTGGAAGCTGGGGCGCGT	1	Slc9b2_+_135307640.23-P1P2	GAGGTCCAGTGGCgcggggc	2	Slc9b2_-_135307554.23-P1P2|Slc9b2_+_135307640.23-P1P2
Prkra	P1P2	Prkra_+_76648144.23-P1P2	GGAGCCCGAGGAACGGGAAA	1	Prkra_+_76648201.23-P1P2	GAACCCAACTAGAGAGCGGG	2	Prkra_+_76648144.23-P1P2|Prkra_+_76648201.23-P1P2
Olfr532	ENSMUST00000073226.1	Olfr532_-_140420107.23-ENSMUST00000073226.1	GTCAGCTAAGGCATACCAAG	1	Olfr532_-_140419878.23-ENSMUST00000073226.1	GGGTCCAGGATTGCTTCTCA	2	Olfr532_-_140420107.23-ENSMUST00000073226.1|Olfr532_-_140419878.23-ENSMUST00000073226.1
Palb2	P1P2	Palb2_-_122133036.23-P1P2	GAGAGTCGAATGAGAGTCCA	1	Palb2_+_122132890.23-P1P2	GTGGCTCGGCAGGAACATAG	2	Palb2_-_122133036.23-P1P2|Palb2_+_122132890.23-P1P2
Reck	P1P2	Reck_+_43875289.23-P1P2	GCCGTGTCGGGGCACATAGG	1	Reck_-_43875388.23-P1P2	GCCCGGGAGCCCGAGTCCGA	2	Reck_+_43875289.23-P1P2|Reck_-_43875388.23-P1P2
Alkbh8	P1P2	Alkbh8_+_3335435.23-P1P2	GGGGCTACCACAACCCCCTT	1	Alkbh8_+_3335334.23-P1P2	GTTGGGTGAATAGTAATCGt	2	Alkbh8_+_3335435.23-P1P2|Alkbh8_+_3335334.23-P1P2
Coq2	P1P2	Coq2_-_100674279.23-P1P2	GCGGTCGGTGGCGTCATCCA	1	Coq2_-_100674260.23-P1P2	GATGGCGCCAGGCTGGACGC	2	Coq2_-_100674279.23-P1P2|Coq2_-_100674260.23-P1P2
Ryk	P1P2	Ryk_-_102834783.23-P1P2	GCGGCCCCCACCCCGACCTC	1	Ryk_+_102834767.23-P1P2	GTCAGACCTGAGGTCGGGGT	2	Ryk_-_102834783.23-P1P2|Ryk_+_102834767.23-P1P2
Yy2	P1	Yy2_+_157569135.23-P1	GGGAAGGTGTGCAATCAAAA	1	Yy2_+_157569177.23-P1	GTAAAATAGCAGGAAACCCA	2	Yy2_+_157569135.23-P1|Yy2_+_157569177.23-P1
Tubgcp5	P1P2	Tubgcp5_+_55794058.23-P1P2	GCAGCCCCGGAGCTGTGCCT	1	Tubgcp5_-_55794076.23-P1P2	GTTTCCCAGGCACAGCTCCG	2	Tubgcp5_+_55794058.23-P1P2|Tubgcp5_-_55794076.23-P1P2
Gpx3	P1P2	Gpx3_-_54902789.23-P1P2	GTCACCGTCGCCCCGGTCTG	1	Gpx3_+_54902753.23-P1P2	GACGGTGACACAAGCCTAGG	2	Gpx3_-_54902789.23-P1P2|Gpx3_+_54902753.23-P1P2
Lrrc55	P1P2	Lrrc55_-_85196883.23-P1P2	GGACCCAGTTGAGGTACCCC	1	Lrrc55_+_85196864.23-P1P2	GACCCTGGGGTACCTCAACT	2	Lrrc55_-_85196883.23-P1P2|Lrrc55_+_85196864.23-P1P2
Foxa2	P2	Foxa2_-_148047207.23-P2	GGGCCTTGTGGGATGACTTC	1	Foxa2_-_148047162.23-P2	GAGGGCAGTAGGTGGGGGTA	2	Foxa2_-_148047207.23-P2|Foxa2_-_148047162.23-P2
Armcx4	P1P2	Armcx4_+_134686287.23-P1P2	GGGTCCCTGGTTACTAGGAA	1	Armcx4_-_134686447.23-P1P2	GTGCCTGTGCGTACAGAAGG	2	Armcx4_+_134686287.23-P1P2|Armcx4_-_134686447.23-P1P2
Htr2b	P1P2	Htr2b_+_86112031.23-P1P2	GAAAGAGGAAACAACCTCTC	1	Htr2b_+_86111952.23-P1P2	GACTCAGAGCAAGTCAGTGG	2	Htr2b_+_86112031.23-P1P2|Htr2b_+_86111952.23-P1P2
Rassf2	P1P2	Rassf2_+_132030036.23-P1P2	GCCCCCTagaggggagggag	1	Rassf2_+_132029960.23-P1P2	GGGGTGGGTTGGTCAAGGAT	2	Rassf2_+_132030036.23-P1P2|Rassf2_+_132029960.23-P1P2
Dym	P1P2	Dym_+_75018750.23-P1P2	GGACGCGTCTGGGGACCGAA	1	Dym_+_75018572.23-P1P2	GACTGAGAGCTCTTGCGCAT	2	Dym_+_75018750.23-P1P2|Dym_+_75018572.23-P1P2
Prim1	P1P2	Prim1_-_128015189.23-P1P2	GCATGCGCGCGCAGGGATGG	1	Prim1_-_128015092.23-P1P2	GGATGCAGATGGACTCTAAA	2	Prim1_-_128015189.23-P1P2|Prim1_-_128015092.23-P1P2
Cbx8	P1P2	Cbx8_+_119041101.23-P1P2	GGGGTCACGTAGCAACGCAG	1	Cbx8_-_119041058.23-P1P2	GCGTCCTGGGCCCGTTCTGC	2	Cbx8_+_119041101.23-P1P2|Cbx8_-_119041058.23-P1P2
Man2b1	P1P2	Man2b1_-_85083149.23-P1P2	GTCTCCTGCCAAAAGAGCTC	1	Man2b1_+_85083209.23-P1P2	GGGCAGGGCCTGGGTCATCA	2	Man2b1_-_85083149.23-P1P2|Man2b1_+_85083209.23-P1P2
Olfr685	ENSMUST00000051355.5	Olfr685_+_105181509.23-ENSMUST00000051355.5	GTCAGCCTGGTTCAGATATG	1	Olfr685_+_105181705.23-ENSMUST00000051355.5	GTACTGAGTGCTGTGTCATG	2	Olfr685_+_105181509.23-ENSMUST00000051355.5|Olfr685_+_105181705.23-ENSMUST00000051355.5
Otud6b	P1P2	Otud6b_+_14826538.23-P1P2	GCAGGCGCCCTAGCCCATGT	1	Otud6b_+_14826570.23-P1P2	GTCCGGCGCGCCGCCCAGAG	2	Otud6b_+_14826538.23-P1P2|Otud6b_+_14826570.23-P1P2
Mthfr	P1	Mthfr_+_148038974.23-P1	GCGGAAGTCCCGCCCCAACA	1	Mthfr_-_148038911.23-P1	GGGAGTGGCTGCAGACGGGT	2	Mthfr_+_148038974.23-P1|Mthfr_-_148038911.23-P1
Cdk16	P1P2	Cdk16_+_20688393.23-P1P2	GCATGCGCACGCACACGCTG	1	Cdk16_+_20688285.23-P1P2	GGCGTGCCCAGCAGGGAATG	2	Cdk16_+_20688393.23-P1P2|Cdk16_+_20688285.23-P1P2
Ccdc85c	P1P2	Ccdc85c_+_108275528.23-P1P2	GcgggccggcgcACCGCGTA	1	Ccdc85c_+_108275519.23-P1P2	GgcACCGCGTAGGGGGACCT	2	Ccdc85c_+_108275528.23-P1P2|Ccdc85c_+_108275519.23-P1P2
Nrep	P1P2	Nrep_-_33463590.23-P1P2	GCCTCGGAAAAGGAGGGGAA	1	Nrep_+_33463931.23-P1P2	GGCCCTGTGCCCTAcggcgg	2	Nrep_-_33463590.23-P1P2|Nrep_+_33463931.23-P1P2
Sult2a6	P1P2	Sult2a6_+_14255065.23-P1P2	GGGTTTGTGGTCATGAACTC	1	Sult2a6_+_14255272.23-P1P2	Ggaaaggagggcgggctttg	2	Sult2a6_+_14255065.23-P1P2|Sult2a6_+_14255272.23-P1P2
Tti1	P1P2	Tti1_+_158028764.23-P1P2	GACAGCTCGGGGTACCAGGT	1	Tti1_-_158028634.23-P1P2	GCCTAAGGATCGTTTTCCTC	2	Tti1_+_158028764.23-P1P2|Tti1_-_158028634.23-P1P2
Ptrf	P1P2	Ptrf_-_100970782.23-P1P2	GTGGGCGCCCCACCCTGTTC	1	Ptrf_-_100970790.23-P1P2	GCCACCCTGTTCAGGATGGT	2	Ptrf_-_100970782.23-P1P2|Ptrf_-_100970790.23-P1P2
Kctd2	P1P2	Kctd2_+_115419950.23-P1P2	GTGGCCAAGGAGAGAACTTC	1	Kctd2_+_115420028.23-P1P2	GCGCGCCCGCCTTCCAGGAC	2	Kctd2_+_115419950.23-P1P2|Kctd2_+_115420028.23-P1P2
Olfr118	ENSMUST00000122036.1	Olfr118_-_37671560.23-ENSMUST00000122036.1	GGGTAAAGAGACAGTATCTG	1	Olfr118_-_37671870.23-ENSMUST00000122036.1	GTAAGCTATCATAATTGCTG	2	Olfr118_-_37671560.23-ENSMUST00000122036.1|Olfr118_-_37671870.23-ENSMUST00000122036.1
Erc2	P1P2	Erc2_-_27622332.23-P1P2	GTCCCAGCCGCGGCCCCTCC	1	Erc2_-_27622404.23-P1P2	GAGCGCGCGTGTCGGGACTG	2	Erc2_-_27622332.23-P1P2|Erc2_-_27622404.23-P1P2
Acadvl	P1P2	Acadvl_+_70015523.23-P1P2	GAAAACGGATCGTTTGAAGA	1	Acadvl_-_70015663.23-P1P2	GAGGTTGGAGGTAGACTGGA	2	Acadvl_+_70015523.23-P1P2|Acadvl_-_70015663.23-P1P2
Tulp4	ENSMUST00000039655.2	Tulp4_-_6137862.23-ENSMUST00000039655.2	GGGAGATGGTGCATCTTGGA	1	Tulp4_+_6138086.23-ENSMUST00000039655.2	GCCCTTCCCTCAAGCAGAGG	2	Tulp4_-_6137862.23-ENSMUST00000039655.2|Tulp4_+_6138086.23-ENSMUST00000039655.2
Prkar1b	P1P2	Prkar1b_+_139129867.23-P1P2	GGGCCTGCGCGACAGAGCTC	1	Prkar1b_+_139129943.23-P1P2	GCGGGCTAGCTTAGGAAGAG	2	Prkar1b_+_139129867.23-P1P2|Prkar1b_+_139129943.23-P1P2
Mfap1a	P1P2	Mfap1a_+_121506786.23-P1P2	GCAGTTCTGGAAAATGTCGA	1	Mfap1a_-_121506752.23-P1P2	GCGGATCGCTTAAAGGGCTA	2	Mfap1a_+_121506786.23-P1P2|Mfap1a_-_121506752.23-P1P2
Gm12794	ENSMUST00000052027.7	Gm12794_+_101940239.23-ENSMUST00000052027.7	GGCCCAACTATCCAATCTTG	1	Gm12794_+_101939890.23-ENSMUST00000052027.7	GAGGCCAGTGCGAGCAAGCA	2	Gm12794_+_101940239.23-ENSMUST00000052027.7|Gm12794_+_101939890.23-ENSMUST00000052027.7
Clint1	P1P2	Clint1_+_45851861.23-P1P2	GGCGCCCCCGGAGCGTGAGA	1	Clint1_-_45851837.23-P1P2	GCACGCGGAGGCTGTGTCAG	2	Clint1_+_45851861.23-P1P2|Clint1_-_45851837.23-P1P2
Prf1	P1P2	Prf1_-_61297681.23-P1P2	GCGGATGAGGAGGTGACAAC	1	Prf1_-_61297718.23-P1P2	GAACCTGTGACCACACTCTG	2	Prf1_-_61297681.23-P1P2|Prf1_-_61297718.23-P1P2
Tsnax	P1P2	Tsnax_-_125012734.23-P1P2	GAGGCTGCTCAGAGAGGCGA	1	Tsnax_-_125013042.23-P1P2	GCGGACGCAGCTCCCGGCTG	2	Tsnax_-_125012734.23-P1P2|Tsnax_-_125013042.23-P1P2
Wbscr22	P1P2	Wbscr22_+_135064208.23-P1P2	GGCGCCGAGGCAGCCAATGG	1	Wbscr22_-_135064315.23-P1P2	GGAGATGGTGGCAGGTCCGG	2	Wbscr22_+_135064208.23-P1P2|Wbscr22_-_135064315.23-P1P2
Epb4.1l2	P1P2	Epb4.1l2_+_25359702.23-P1P2	GCCCCGGCGCCTGCTGGCGT	1	Epb4.1l2_-_25359663.23-P1P2	GCACCCCTGCGGCGGGGCAC	2	Epb4.1l2_+_25359702.23-P1P2|Epb4.1l2_-_25359663.23-P1P2
Mnt	P1P2	Mnt_+_74830788.23-P1P2	GCGCACACGTGGCTTGGGTG	1	Mnt_+_74830794.23-P1P2	GCGCGCGCGCACACGTGGCT	2	Mnt_+_74830788.23-P1P2|Mnt_+_74830794.23-P1P2
Kctd4	P1P2	Kctd4_-_75954903.23-P1P2	GAGCAATGCGTAAGCAGGAA	1	Kctd4_-_75954970.23-P1P2	GGCAGGGTTAGGAAGTCCTC	2	Kctd4_-_75954903.23-P1P2|Kctd4_-_75954970.23-P1P2
Cox20	P1P2	Cox20_+_178318818.23-P1P2	GTCCCCGTGCTGGGCGCTGA	1	Cox20_+_178319115.23-P1P2	GCCCGCGACGGGAGCAACAC	2	Cox20_+_178318818.23-P1P2|Cox20_+_178319115.23-P1P2
Ces2g	P1P2	Ces2g_-_104961625.23-P1P2	GTGCCCTGCCTCCAGGCCAT	1	Ces2g_+_104961584.23-P1P2	GCAAAGTCGCtgtatttatc	2	Ces2g_-_104961625.23-P1P2|Ces2g_+_104961584.23-P1P2
Osbpl6	P1P2	Osbpl6_-_76406436.23-P1P2	GGAGCCCGCGGGAACGATCG	1	Osbpl6_-_76406386.23-P1P2	GGCTGGATCCCGCACGAAGG	2	Osbpl6_-_76406436.23-P1P2|Osbpl6_-_76406386.23-P1P2
Fhl5	P1P2	Fhl5_+_25243023.23-P1P2	GCCTCTGAGAATTCTTATGA	1	Fhl5_-_25243005.23-P1P2	GTCAGAGTATATTGGGAGAG	2	Fhl5_+_25243023.23-P1P2|Fhl5_-_25243005.23-P1P2
AI607873	P1P2	AI607873_+_173742192.23-P1P2	GTCTCAGAGCCACAAGTCTC	1	AI607873_-_173742219.23-P1P2	GACTTGTGGCTCTGAGATTT	2	AI607873_+_173742192.23-P1P2|AI607873_-_173742219.23-P1P2
Slc25a34	P1P2	Slc25a34_-_141623941.23-P1P2	GGGGCCTGGGCCATGGGATC	1	Slc25a34_-_141624009.23-P1P2	GGCCAAGCTAGAGTAGGGGA	2	Slc25a34_-_141623941.23-P1P2|Slc25a34_-_141624009.23-P1P2
Gm4027	ENSMUST00000164838.2	Gm4027_-_87618384.23-ENSMUST00000164838.2	Ggaagcgtcagaactattta	1	Gm4027_-_87618388.23-ENSMUST00000164838.2	Gcgtcagaactatttatgga	2	Gm4027_-_87618384.23-ENSMUST00000164838.2|Gm4027_-_87618388.23-ENSMUST00000164838.2
Tfcp2	P1P2	Tfcp2_+_100552135.23-P1P2	GAGCCCGCCCACTACTCCGG	1	Tfcp2_+_100551936.23-P1P2	GCGGTCGTGGTGGCTAAGGA	2	Tfcp2_+_100552135.23-P1P2|Tfcp2_+_100551936.23-P1P2
Gemin5	P1	Gemin5_-_58168630.23-P1	GCCGCCTGGAACTAAATTCC	1	Gemin5_+_58168581.23-P1	GGGAGCGAGAGGCGCGGGTT	2	Gemin5_-_58168630.23-P1|Gemin5_+_58168581.23-P1
Cir1	P1P2	Cir1_-_73312723.23-P1P2	GGCGCAGCAGAGGTAAGCTT	1	Cir1_+_73312727.23-P1P2	GAGCGAGCATCGCGCACAGG	2	Cir1_-_73312723.23-P1P2|Cir1_+_73312727.23-P1P2
Mrc1	P1P2	Mrc1_-_14229337.23-P1P2	GTGACAGGATATCTCTCAAT	1	Mrc1_+_14229167.23-P1P2	GGACCCAGGCCATGAGCAGC	2	Mrc1_-_14229337.23-P1P2|Mrc1_+_14229167.23-P1P2
Pfdn5	P1P2	Pfdn5_+_102325973.23-P1P2	GAAAGCTAGCACGGTaattt	1	Pfdn5_-_102326130.23-P1P2	GCACCACGGAGGTAACGCGG	2	Pfdn5_+_102325973.23-P1P2|Pfdn5_-_102326130.23-P1P2
Il1rl2	P1P2	Il1rl2_-_40324298.23-P1P2	GCTAAGGGAGAGAGACACGT	1	Il1rl2_-_40324282.23-P1P2	GGGGACAACCAAAATGGCTA	2	Il1rl2_-_40324298.23-P1P2|Il1rl2_-_40324282.23-P1P2
Atp6v1g1	P1P2	Atp6v1g1_-_63544617.23-P1P2	GTCTCAATGCGCAGGCGTAG	1	Atp6v1g1_+_63544591.23-P1P2	GACGCCTGCGCATTGAGAGA	2	Atp6v1g1_-_63544617.23-P1P2|Atp6v1g1_+_63544591.23-P1P2
Lancl3	P1P2	Lancl3_+_9199772.23-P1P2	GGACGTGCAGGGCACGGATC	1	Lancl3_+_9199783.23-P1P2	GAGAAGGCCTGGGACGTGCA	2	Lancl3_+_9199772.23-P1P2|Lancl3_+_9199783.23-P1P2
Ltv1	P1P2	Ltv1_-_13193243.23-P1P2	GCGGGGACTTCCGGGAGGTG	1	Ltv1_-_13193262.23-P1P2	GGGGCTAGCAGGACCTTCAG	2	Ltv1_-_13193243.23-P1P2|Ltv1_-_13193262.23-P1P2
Pdzk1	P1P2	Pdzk1_+_96829916.23-P1P2	GCCCACCCCAGCCTAACAAT	1	Pdzk1_+_96829911.23-P1P2	GCCCAGCCTAACAATGGGAA	2	Pdzk1_+_96829916.23-P1P2|Pdzk1_+_96829911.23-P1P2
Cped1	P1P2	Cped1_+_21985824.23-P1P2	GTTCTGCCCCAGCAAAGGGT	1	Cped1_-_21985858.23-P1P2	GGGGGCAGAAACTTATAACG	2	Cped1_+_21985824.23-P1P2|Cped1_-_21985858.23-P1P2
Stx3	P1P2	Stx3_-_11818932.23-P1P2	GcggcgccgcgcTCCAAATC	1	Stx3_+_11818974.23-P1P2	GGAGCGGCCCAGGTATGGGG	2	Stx3_-_11818932.23-P1P2|Stx3_+_11818974.23-P1P2
Slc16a12	P1P2	Slc16a12_+_34747329.23-P1P2	GCCCCAGCGCAGAGCGGATC	1	Slc16a12_-_34747295.23-P1P2	GTCAGTCACCGCAGCCCCGA	2	Slc16a12_+_34747329.23-P1P2|Slc16a12_-_34747295.23-P1P2
Olfr520	ENSMUST00000098264.1	Olfr520_-_99734957.23-ENSMUST00000098264.1	GTTGGTACTTGGCAGATCTG	1	Olfr520_-_99734969.23-ENSMUST00000098264.1	GAGATCTGGGGCTCAGAGGG	2	Olfr520_-_99734957.23-ENSMUST00000098264.1|Olfr520_-_99734969.23-ENSMUST00000098264.1
Tbc1d32	P1P2	Tbc1d32_-_56228849.23-P1P2	GAACTTGCTGAGGCTAACGT	1	Tbc1d32_-_56228803.23-P1P2	GTGGCGATGTGCTGGAAGAC	2	Tbc1d32_-_56228849.23-P1P2|Tbc1d32_-_56228803.23-P1P2
Thbs2	P1P2	Thbs2_+_14694257.23-P1P2	GGGAGGGGCGTTAGCTCTGA	1	Thbs2_+_14694273.23-P1P2	GCCTGGGTGGACCTGTAGGA	2	Thbs2_+_14694257.23-P1P2|Thbs2_+_14694273.23-P1P2
Defb22	P1P2	Defb22_-_152490328.23-P1P2	GTGCACTAGCCATGCCTTCA	1	Defb22_+_152490320.23-P1P2	GAGCCTTCCTACTTCCCTGA	2	Defb22_-_152490328.23-P1P2|Defb22_+_152490320.23-P1P2
Edc4	P1P2	Edc4_+_105880804.23-P1P2	GGAGCCCCAGTTCCTATCAG	1	Edc4_-_105880822.23-P1P2	GCTGCCTCTGATAGGAACTG	2	Edc4_+_105880804.23-P1P2|Edc4_-_105880822.23-P1P2
Uba3	P1P2	Uba3_-_97205855.23-P1P2	GACTAGAGGCGCGGCTTCAG	1	Uba3_-_97205733.23-P1P2	GAGAGGCGGAGCTGGGGTTT	2	Uba3_-_97205855.23-P1P2|Uba3_-_97205733.23-P1P2
Dnajb8	P1P2	Dnajb8_-_88222105.23-P1P2	GCGACCCCGCCTCTCCTCTT	1	Dnajb8_+_88222070.23-P1P2	GCGGGGTCGGGTCAGCGACA	2	Dnajb8_-_88222105.23-P1P2|Dnajb8_+_88222070.23-P1P2
Aox2	P1P2	Aox2_+_58278088.23-P1P2	GCACCCTGCCCCAGTCCCAA	1	Aox2_-_58278121.23-P1P2	GGGGCAGGGTGCAGGGTTTG	2	Aox2_+_58278088.23-P1P2|Aox2_-_58278121.23-P1P2
Cnga2	P1P2	Cnga2_-_71991673.23-P1P2	GATTTAGCCTCCAGTAAGGT	1	Cnga2_+_71991595.23-P1P2	GCCAGAGAGGGGAAATTCAA	2	Cnga2_-_71991673.23-P1P2|Cnga2_+_71991595.23-P1P2
Ikbke	P1P2	Ikbke_+_131279754.23-P1P2	GAGCCCCCAGCCTCCGTTCT	1	Ikbke_-_131279772.23-P1P2	GAAGCCAAGAACGGAGGCTG	2	Ikbke_+_131279754.23-P1P2|Ikbke_-_131279772.23-P1P2
Chi3l1	P1	Chi3l1_+_134182327.23-P1	GGGAGGCGGGGAGTCACCTG	1	Chi3l1_-_134182194.23-P1	GCTGGCAAGAAGCAAGACGT	2	Chi3l1_+_134182327.23-P1|Chi3l1_-_134182194.23-P1
Plekhg6	P1P2	Plekhg6_-_125380613.23-P1P2	GCACCCGGACAGAGAGGGTA	1	Plekhg6_-_125380608.23-P1P2	GCTGGTCACCCGGACAGAGA	2	Plekhg6_-_125380613.23-P1P2|Plekhg6_-_125380608.23-P1P2
Hes1	P1P2	Hes1_+_30065172.23-P1P2	GGGCCGCTAGGCACAAGGTC	1	Hes1_-_30065203.23-P1P2	GTGCCTAGCGGCCAATGGGG	2	Hes1_+_30065172.23-P1P2|Hes1_-_30065203.23-P1P2
AI427809	P1P2	AI427809_+_53270480.23-P1P2	GGGGTGTCAGATCGTTTAGA	1	AI427809_-_53270322.23-P1P2	Gcctccactgcgcatgtgct	2	AI427809_+_53270480.23-P1P2|AI427809_-_53270322.23-P1P2
Pax6	P1	Pax6_-_105668774.23-P1	GAAGAGAGGGAGTCTCCCGC	1	Pax6_-_105668729.23-P1	GCAGACCCCTGAAGACTCTT	2	Pax6_-_105668774.23-P1|Pax6_-_105668729.23-P1
Aldh1b1	P1P2	Aldh1b1_-_45798777.23-P1P2	GTATCAACAAGGTCTGTCAA	1	Aldh1b1_-_45798827.23-P1P2	GGAGCCGGGCATGTGATCCT	2	Aldh1b1_-_45798777.23-P1P2|Aldh1b1_-_45798827.23-P1P2
Hexdc	P1P2	Hexdc_+_121204315.23-P1P2	GCCCAGGGGTGGGACCTAAC	1	Hexdc_+_121204547.23-P1P2	GGGGCCCGATGGCGCCTCAG	2	Hexdc_+_121204315.23-P1P2|Hexdc_+_121204547.23-P1P2
S100a16	P2	S100a16_-_90541117.23-P2	GTTGGAGGGGCTCTGTGCAT	1	S100a16_+_90541018.23-P2	GCCCTCACCCAGCTGGTCCC	2	S100a16_-_90541117.23-P2|S100a16_+_90541018.23-P2
Nxpe3	P1P2	Nxpe3_+_55895535.23-P1P2	GTAACCCAAGCTCCCTGGGG	1	Nxpe3_-_55895553.23-P1P2	GCGACCGCCCCAGGGAGCTT	2	Nxpe3_+_55895535.23-P1P2|Nxpe3_-_55895553.23-P1P2
Tceb1	P1P2	Tceb1_-_16657049.23-P1P2	GTCTGGAGGAAGTGCGTTGT	1	Tceb1_+_16657083.23-P1P2	GCATCTCATTGGTTGGGATT	2	Tceb1_-_16657049.23-P1P2|Tceb1_+_16657083.23-P1P2
Zfp474	P1P2	Zfp474_+_52615802.23-P1P2	GGAAGCAGAAGTAGACTGGA	1	Zfp474_-_52615768.23-P1P2	GTCCTGGGTGTTCAGAACTT	2	Zfp474_+_52615802.23-P1P2|Zfp474_-_52615768.23-P1P2
2200002J24Rik	P1P2	2200002J24Rik_-_30698615.23-P1P2	GCAGCCTGGGCGTACATCTC	1	2200002J24Rik_-_30698754.23-P1P2	GGGGCCATCAGCTGTAAGCC	2	2200002J24Rik_-_30698615.23-P1P2|2200002J24Rik_-_30698754.23-P1P2
Vmn2r19	ENSMUST00000073948.6	Vmn2r19_-_123308151.23-ENSMUST00000073948.6	GGCAAAGCAGATTGTACTCC	1	Vmn2r19_+_123308061.23-ENSMUST00000073948.6	GCTCCAAGGGCTCAGGAACC	2	Vmn2r19_-_123308151.23-ENSMUST00000073948.6|Vmn2r19_+_123308061.23-ENSMUST00000073948.6
Olfr498	ENSMUST00000074787.1	Olfr498_+_108464991.23-ENSMUST00000074787.1	GAGACTTGGACCAGTAAGAT	1	Olfr498_-_108465172.23-ENSMUST00000074787.1	GGTACAAATAATGAAAATGG	2	Olfr498_+_108464991.23-ENSMUST00000074787.1|Olfr498_-_108465172.23-ENSMUST00000074787.1
Awat2	P1P2	Awat2_+_100412755.23-P1P2	GGGTGTCACAATCCCAACTC	1	Awat2_-_100412873.23-P1P2	GCCAAGGCCAGTCTGAAAAT	2	Awat2_+_100412755.23-P1P2|Awat2_-_100412873.23-P1P2
Ryr1	P1P2	Ryr1_+_29125238.23-P1P2	GTGGGCGGGGTTCTGAACAG	1	Ryr1_-_29125140.23-P1P2	GGAAGCCAGAGGCACCCGCG	2	Ryr1_+_29125238.23-P1P2|Ryr1_-_29125140.23-P1P2
Egr2	P1	Egr2_-_67537690.23-P1	GGACCCGGGTGGTTGTCCAC	1	Egr2_+_67537664.23-P1	GGGACAACCACCCGGGTCTG	2	Egr2_-_67537690.23-P1|Egr2_+_67537664.23-P1
Slc35a1	P1P2	Slc35a1_+_34687494.23-P1P2	GGGGGCCCATCCTCTCGGAG	1	Slc35a1_+_34687607.23-P1P2	GTAACCATGGAAGGCCGTGA	2	Slc35a1_+_34687494.23-P1P2|Slc35a1_+_34687607.23-P1P2
Fnbp1	P1P2	Fnbp1_+_31142256.23-P1P2	GGCTAGGCGCGATGGGTAGA	1	Fnbp1_-_31142144.23-P1P2	GGGAAGGACGTGAACCCCTG	2	Fnbp1_+_31142256.23-P1P2|Fnbp1_-_31142144.23-P1P2
Pomp	P1P2	Pomp_+_147860463.23-P1P2	GAGGGCCAAGGGCGCAGCTC	1	Pomp_+_147860481.23-P1P2	GGCTGTCCCCCGGTGAGCGA	2	Pomp_+_147860463.23-P1P2|Pomp_+_147860481.23-P1P2
Ephx3	P1P2	Ephx3_-_32189592.23-P1P2	GAGCCCTAGGACATGCTGGA	1	Ephx3_-_32189500.23-P1P2	GGGGCAGAACGAGACACTTA	2	Ephx3_-_32189592.23-P1P2|Ephx3_-_32189500.23-P1P2
Armc4	P1P2	Armc4_-_7298132.23-P1P2	GCAGCTCAGTCTAGGTACTT	1	Armc4_+_7298069.23-P1P2	GCAGGCTGCTGGAAGAATCC	2	Armc4_-_7298132.23-P1P2|Armc4_+_7298069.23-P1P2
Olfr43	ENSMUST00000078936.2	Olfr43_+_74207441.23-ENSMUST00000078936.2	GTTAAATGGCATTTTTTGTA	1	Olfr43_+_74207625.23-ENSMUST00000078936.2	GAGTGAGGCAAGTGTGATCC	2	Olfr43_+_74207441.23-ENSMUST00000078936.2|Olfr43_+_74207625.23-ENSMUST00000078936.2
Bach1	P1P2	Bach1_-_87698795.23-P1P2	GCGCAGGAGGCGAAATAGAG	1	Bach1_-_87698829.23-P1P2	GGAGGGCGTGGCCTGGAACG	2	Bach1_-_87698795.23-P1P2|Bach1_-_87698829.23-P1P2
Npl	P1P2	Npl_+_153549906.23-P1P2	GAGGACAGTGGGTATCCAAG	1	Npl_-_153549863.23-P1P2	GGCACTAGTTGCTCCTTCTT	2	Npl_+_153549906.23-P1P2|Npl_-_153549863.23-P1P2
Pin1	P1P2	Pin1_-_20651992.23-P1P2	GTGTAGGGGCGGTCCGACCG	1	Pin1_-_20651976.23-P1P2	GAAGGTGGGAGGCTGTGTGT	2	Pin1_-_20651992.23-P1P2|Pin1_-_20651976.23-P1P2
Fgfr2	P1P2	Fgfr2_+_130266423.23-P1P2	GGGGCCCCTCGCCTGCCTGG	1	Fgfr2_+_130266392.23-P1P2	GTGCGGCTGCTAGGCTTCGG	2	Fgfr2_+_130266423.23-P1P2|Fgfr2_+_130266392.23-P1P2
2410137M14Rik	P1P2	2410137M14Rik_-_36981429.23-P1P2	GGTGGTGCGGGGGTCAACCC	1	2410137M14Rik_+_36981401.23-P1P2	GTGACCCCCGCACCACCCCT	2	2410137M14Rik_-_36981429.23-P1P2|2410137M14Rik_+_36981401.23-P1P2
Bax	P1P2	Bax_+_45466853.23-P1P2	GTTGCGGGGCACCCACGTGA	1	Bax_+_45466867.23-P1P2	GGGGCGGAGGCCATGTTGCG	2	Bax_+_45466853.23-P1P2|Bax_+_45466867.23-P1P2
Tcte1	P1P2	Tcte1_-_45523396.23-P1P2	GAGCCAGAAAGCACGAGCGG	1	Tcte1_-_45523226.23-P1P2	GGACCACAGGGGAATTCCAG	2	Tcte1_-_45523396.23-P1P2|Tcte1_-_45523226.23-P1P2
Ank1	P1P2	Ank1_+_23034985.23-P1P2	GGCCGGGTCTACACAGACAC	1	Ank1_+_23035043.23-P1P2	GGTGGCCCTCAGATTGGCTT	2	Ank1_+_23034985.23-P1P2|Ank1_+_23035043.23-P1P2
Gpr112	ENSMUST00000096431.3	Gpr112_-_56963183.23-ENSMUST00000096431.3	GTGAAGGGGCAGAATTGAAA	1	Gpr112_-_56963159.23-ENSMUST00000096431.3	GACCTTGACAAAGACATAGT	2	Gpr112_-_56963183.23-ENSMUST00000096431.3|Gpr112_-_56963159.23-ENSMUST00000096431.3
Aqp1	P1P2	Aqp1_-_55336249.23-P1P2	GAGGCGGGTggagggagcaa	1	Aqp1_-_55336346.23-P1P2	GAGGAGGCTCGTGTGGTGTG	2	Aqp1_-_55336249.23-P1P2|Aqp1_-_55336346.23-P1P2
Adh5	P1P2	Adh5_+_138442987.23-P1P2	GGGCGGGCCTAATACCGGAA	1	Adh5_+_138443026.23-P1P2	GGGAGGAGGTGGCTGTGCGT	2	Adh5_+_138442987.23-P1P2|Adh5_+_138443026.23-P1P2
Pak3	P1	Pak3_+_143664225.23-P1	GGGCAGGAAGCGCCCTagga	1	Pak3_+_143664222.23-P1	GAGGAAGCGCCCTaggaggg	2	Pak3_+_143664225.23-P1|Pak3_+_143664222.23-P1
Krt33a	P1P2	Krt33a_+_100016395.23-P1P2	GGGCAAGGAGTCCCGACTGA	1	Krt33a_+_100016328.23-P1P2	GGAAGCAGAGCAAATGAATG	2	Krt33a_+_100016395.23-P1P2|Krt33a_+_100016328.23-P1P2
Commd10	P1P2	Commd10_+_46958728.23-P1P2	GCGAAGGCTTGTGCGTGGTC	1	Commd10_-_46958791.23-P1P2	GTCGAGGTCTCAAACCTGCC	2	Commd10_+_46958728.23-P1P2|Commd10_-_46958791.23-P1P2
Mast1	P1P2	Mast1_-_84937534.23-P1P2	GCCAATGCACCTCTCCCCCA	1	Mast1_+_84937625.23-P1P2	GGTGAACGGAGAGGCATCGT	2	Mast1_-_84937534.23-P1P2|Mast1_+_84937625.23-P1P2
Pou1f1	P1P2	Pou1f1_+_65520334.23-P1P2	GGACGTACAAAGTGAGGAGC	1	Pou1f1_-_65520436.23-P1P2	GACAAAGCAACACTCCTGTG	2	Pou1f1_+_65520334.23-P1P2|Pou1f1_-_65520436.23-P1P2
Col9a2	P1	Col9a2_+_121039542.23-P1	GTCCAGCTCCGCCCGGTCAG	1	Col9a2_-_121039367.23-P1	GCTTGCCCGGGGAAAGGATG	2	Col9a2_+_121039542.23-P1|Col9a2_-_121039367.23-P1
9130023H24Rik	P1P2	9130023H24Rik_+_128238229.23-P1P2	GCGGCCCAGGGGTGTCTCGT	1	9130023H24Rik_+_128238058.23-P1P2	GAGAGAGCGGAACTGGAAGA	2	9130023H24Rik_+_128238229.23-P1P2|9130023H24Rik_+_128238058.23-P1P2
Wdr19	P1P2	Wdr19_+_65199526.23-P1P2	GGGGAAGTTGAATGCTACGA	1	Wdr19_+_65199562.23-P1P2	GGGGTAGAGTCACGTGATGG	2	Wdr19_+_65199526.23-P1P2|Wdr19_+_65199562.23-P1P2
Kng2	P1P2	Kng2_-_23029145.23-P1P2	GAACAAGAGCATTGCAACAT	1	Kng2_-_23029332.23-P1P2	GTCTGCGTACGTGAACAATG	2	Kng2_-_23029145.23-P1P2|Kng2_-_23029332.23-P1P2
Maff	P1P2	Maff_-_79347377.23-P1P2	GCCAGCACGGAGAACCGTGG	1	Maff_-_79347469.23-P1P2	GGCTCCAGGCGGCCGCTCTG	2	Maff_-_79347377.23-P1P2|Maff_-_79347469.23-P1P2
Tpbpb	P1P2	Tpbpb_+_60905250.23-P1P2	GACAGTGGGGAAGTATCATG	1	Tpbpb_+_60905095.23-P1P2	GCCCACAAAGCACAATATCA	2	Tpbpb_+_60905250.23-P1P2|Tpbpb_+_60905095.23-P1P2
Banf1	P1P2	Banf1_-_5366766.23-P1P2	GCCAGCCGCGGCGCCCACGG	1	Banf1_+_5366777.23-P1P2	GATGGCTTCTTGAGAGGAAC	2	Banf1_-_5366766.23-P1P2|Banf1_+_5366777.23-P1P2
Rbm47	P1P2	Rbm47_-_66054706.23-P1P2	GAGGGGCCATAGCTGTCCTG	1	Rbm47_-_66054683.23-P1P2	GAAGGCGTGGCTCAGAAAGC	2	Rbm47_-_66054706.23-P1P2|Rbm47_-_66054683.23-P1P2
Loxhd1	P1P2	Loxhd1_+_77281530.23-P1P2	GTCCCACCTGGCCTCACGAC	1	Loxhd1_+_77281487.23-P1P2	GCCCCTCCAGGCCACTCCAA	2	Loxhd1_+_77281530.23-P1P2|Loxhd1_+_77281487.23-P1P2
Gpr111	P1P2	Gpr111_+_42742370.23-P1P2	GTGCCAGGATGAGAAGGTAT	1	Gpr111_+_42742084.23-P1P2	GGAAGCACCCAGCACGGCGG	2	Gpr111_+_42742370.23-P1P2|Gpr111_+_42742084.23-P1P2
Cma2	P1P2	Cma2_+_55950734.23-P1P2	GGGGTGGGGCCTAACTGGAG	1	Cma2_+_55950628.23-P1P2	GATAGCTTCCAGGTCTTCGT	2	Cma2_+_55950734.23-P1P2|Cma2_+_55950628.23-P1P2
Ttc8	P1P2	Ttc8_+_98920502.23-P1P2	GGCAGCGCGCCTGAAAACAG	1	Ttc8_+_98920497.23-P1P2	GGCGCCTGAAAACAGGGGAC	2	Ttc8_+_98920502.23-P1P2|Ttc8_+_98920497.23-P1P2
Vwa3b	P1P2	Vwa3b_+_37153783.23-P1P2	GCCAGAGCTTAGGGGAGTCA	1	Vwa3b_-_37153678.23-P1P2	GTCCTCTCAAACAGGGCTCT	2	Vwa3b_+_37153783.23-P1P2|Vwa3b_-_37153678.23-P1P2
Nynrin	P1P2	Nynrin_-_55853935.23-P1P2	GTCGAGGTCGAAGGGGAGGA	1	Nynrin_-_55854044.23-P1P2	GGTGCTGCGGCGGAAAGGGA	2	Nynrin_-_55853935.23-P1P2|Nynrin_-_55854044.23-P1P2
Brox	ENSMUST00000057062.5	Brox_+_183297261.23-ENSMUST00000057062.5	GAGGCCGCCCCAATCCTCGG	1	Brox_-_183297136.23-ENSMUST00000057062.5	GCCCGCTGTCGCGGCCCCGT	2	Brox_+_183297261.23-ENSMUST00000057062.5|Brox_-_183297136.23-ENSMUST00000057062.5
Gm5483	P1P2	Gm5483_-_36183628.23-P1P2	Gaaggtttatagtgaacccc	1	Gm5483_-_36183674.23-P1P2	GTTCCAAATATGTAATCAAT	2	Gm5483_-_36183628.23-P1P2|Gm5483_-_36183674.23-P1P2
Slc45a4	P1P2	Slc45a4_+_73645853.23-P1P2	GCCAGGGCGGGGCGCGGTAG	1	Slc45a4_+_73645915.23-P1P2	GTGGCAGGAAAACCAGGCGA	2	Slc45a4_+_73645853.23-P1P2|Slc45a4_+_73645915.23-P1P2
Plekhh2	P1P2	Plekhh2_-_84511761.23-P1P2	GTACTCCGAGGGGCACCGGG	1	Plekhh2_-_84511734.23-P1P2	GGGGAATACCTCTTGGGTCA	2	Plekhh2_-_84511761.23-P1P2|Plekhh2_-_84511734.23-P1P2
Dhx15	P1P2	Dhx15_+_52190641.23-P1P2	GGGGAAAGGGAGGAGCCCGC	1	Dhx15_-_52190622.23-P1P2	GGTCCCGCCCGCTGTGCGAT	2	Dhx15_+_52190641.23-P1P2|Dhx15_-_52190622.23-P1P2
Ccdc166	P1P2	Ccdc166_+_75982680.23-P1P2	GCTAAGACCCGGGTGAGTGG	1	Ccdc166_+_75982718.23-P1P2	GGGGCCTGAAGCGCAGCTAG	2	Ccdc166_+_75982680.23-P1P2|Ccdc166_+_75982718.23-P1P2
Rbmx2	P1P2	Rbmx2_+_48694943.23-P1P2	GCGCCTGCGCAGTAAGGTGA	1	Rbmx2_-_48694905.23-P1P2	GAGGGGGCGGGGACTGACTT	2	Rbmx2_+_48694943.23-P1P2|Rbmx2_-_48694905.23-P1P2
Ier3ip1	P1P2	Ier3ip1_-_76929923.23-P1P2	GCGGTCCCCTCCCTGGTCGC	1	Ier3ip1_+_76929890.23-P1P2	GGAGGGGACCGAAGAGAGTC	2	Ier3ip1_-_76929923.23-P1P2|Ier3ip1_+_76929890.23-P1P2
Exoc6b	P1P2	Exoc6b_-_85069596.23-P1P2	GTCTCTGGGTCAGGCTGAAC	1	Exoc6b_+_85069488.23-P1P2	GCGAGGGCGGGGTCGCGCTG	2	Exoc6b_-_85069596.23-P1P2|Exoc6b_+_85069488.23-P1P2
H2-M1	P1P2	H2-M1_+_36672352.23-P1P2	GTTGGTGAATCAGAGCCCTA	1	H2-M1_-_36672300.23-P1P2	GTAAGAAATCCCAATGGTAG	2	H2-M1_+_36672352.23-P1P2|H2-M1_-_36672300.23-P1P2
Pnpt1	P1P2	Pnpt1_-_29130514.23-P1P2	GcGGCGCGGGAAGTATTAAA	1	Pnpt1_-_29130612.23-P1P2	GTGAAAGAAACGCATTCTGG	2	Pnpt1_-_29130514.23-P1P2|Pnpt1_-_29130612.23-P1P2
Fam78a	P1P2	Fam78a_+_32085122.23-P1P2	GAATACAGGGTTGGGGTTTG	1	Fam78a_-_32083861.23-P1P2	GTAGCTCGAGGGAGGGGTGA	2	Fam78a_+_32085122.23-P1P2|Fam78a_-_32083861.23-P1P2
Car12	P1P2	Car12_-_66713546.23-P1P2	GGGCTCCCCCAAGTAACCTG	1	Car12_+_66713604.23-P1P2	GGGCAGGAGCCCCAGGTCCG	2	Car12_-_66713546.23-P1P2|Car12_+_66713604.23-P1P2
Psmb6	P1P2	Psmb6_+_70525297.23-P1P2	GTGGGAGCGAAGCTGCTTGA	1	Psmb6_+_70525289.23-P1P2	GAAGCTGCTTGACGGCAGAA	2	Psmb6_+_70525297.23-P1P2|Psmb6_+_70525289.23-P1P2
Arpp21	P1	Arpp21_-_112217463.23-P1	GTAGCTCTGACCACATAGGT	1	Arpp21_+_112217433.23-P1	GGTGGTCAGAGCTACAGCTG	2	Arpp21_-_112217463.23-P1|Arpp21_+_112217433.23-P1
Cd69	P1P2	Cd69_+_129275429.23-P1P2	GGGCTGAGTTGAGTGAGTAC	1	Cd69_+_129275421.23-P1P2	GTGAGTGAGTACAGGGTAGG	2	Cd69_+_129275429.23-P1P2|Cd69_+_129275421.23-P1P2
Tph2	P1P2	Tph2_-_115185226.23-P1P2	GTGGAGGGGAACAATACATC	1	Tph2_-_115185198.23-P1P2	GGTAGGTCGAGTAGCTCTTT	2	Tph2_-_115185226.23-P1P2|Tph2_-_115185198.23-P1P2
Txn2	P1	Txn2_-_77929091.23-P1	GAGGAGGACGGAAAAATGTA	1	Txn2_-_77929119.23-P1	GGGGCGCGACCGGAAGGAAT	2	Txn2_-_77929091.23-P1|Txn2_-_77929119.23-P1
Thbd	P1P2	Thbd_+_148408264.23-P1P2	GATCGCGCAGAGGTGATCCC	1	Thbd_+_148408238.23-P1P2	GAGGGCGGGCGCAAGGCGTC	2	Thbd_+_148408264.23-P1P2|Thbd_+_148408238.23-P1P2
Qpctl	P1P2	Qpctl_-_19149381.23-P1P2	GAGGCCCGCCTCCACGGAAG	1	Qpctl_-_19149394.23-P1P2	GCGGAAGAGGACCAGTCAAT	2	Qpctl_-_19149381.23-P1P2|Qpctl_-_19149394.23-P1P2
Bsdc1	P2	Bsdc1_+_129464359.23-P2	GTGACCTGGCATGACACAGT	1	Bsdc1_-_129464292.23-P2	GAAAATGTGCCAGTCACTAG	2	Bsdc1_+_129464359.23-P2|Bsdc1_-_129464292.23-P2
4430402I18Rik	P1	4430402I18Rik_+_28967944.23-P1	GGGCCAGGCTACCACCAGGG	1	4430402I18Rik_-_28967982.23-P1	GTGGCCCAGTGACTGTCTAA	2	4430402I18Rik_+_28967944.23-P1|4430402I18Rik_-_28967982.23-P1
Il25	P1P2	Il25_-_54932442.23-P1P2	GCCCCCGCCCGGAAAGTGCA	1	Il25_-_54932319.23-P1P2	GGGAAATGGTGCCCTTGGAA	2	Il25_-_54932442.23-P1P2|Il25_-_54932319.23-P1P2
Pla2g2f	P1P2	Pla2g2f_-_138757727.23-P1P2	GTCAGCCTACCCACCCCCTT	1	Pla2g2f_+_138757651.23-P1P2	GAAGGGCTGTATCAGTGGGA	2	Pla2g2f_-_138757727.23-P1P2|Pla2g2f_+_138757651.23-P1P2
1200014J11Rik	P1P2	1200014J11Rik_+_73047677.23-P1P2	GCGGGACGAAGCAGTGATGG	1	1200014J11Rik_+_73047680.23-P1P2	GGGGCGGGACGAAGCAGTGA	2	1200014J11Rik_+_73047677.23-P1P2|1200014J11Rik_+_73047680.23-P1P2
Chpt1	P1P2	Chpt1_+_88504133.23-P1P2	GGACCTGAGTCTGAAAGCGC	1	Chpt1_-_88504031.23-P1P2	Ggcaaggccgggccacgggg	2	Chpt1_+_88504133.23-P1P2|Chpt1_-_88504031.23-P1P2
Iglc2	P1P2	Iglc2_+_19200542.23-P1P2	GAAAATCAAGCCAAAATCAA	1	Iglc2_-_19200517.23-P1P2	GCAAAATGACATATTAATTC	2	Iglc2_+_19200542.23-P1P2|Iglc2_-_19200517.23-P1P2
Ccr3	P1P2	Ccr3_-_124022005.23-P1P2	GCGGAAGAACTGTAACAAGT	1	Ccr3_+_124021936.23-P1P2	GCTCTCTGTTGAGTTATCTA	2	Ccr3_-_124022005.23-P1P2|Ccr3_+_124021936.23-P1P2
Ube4a	P1P2	Ube4a_-_44965709.23-P1P2	GGGCAGCTAGCGAGGGTGGG	1	Ube4a_-_44965736.23-P1P2	GCGGAAGTGGCTTTGGGATT	2	Ube4a_-_44965709.23-P1P2|Ube4a_-_44965736.23-P1P2
Sbno1	P1P2	Sbno1_+_124426126.23-P1P2	GCGCATGCGCGCACGTTCAC	1	Sbno1_+_124426050.23-P1P2	GACCTCAACCggtggggcgg	2	Sbno1_+_124426126.23-P1P2|Sbno1_+_124426050.23-P1P2
Rs1	P1P2	Rs1_+_160767944.23-P1P2	GTAACTGTAAGGCGAGTAAT	1	Rs1_-_160768072.23-P1P2	GATGTGGCTTAATTGGATGG	2	Rs1_+_160767944.23-P1P2|Rs1_-_160768072.23-P1P2
Fam207a	P1P2	Fam207a_-_77516034.23-P1P2	GCGCGCGTCTGGGGTAGAAT	1	Fam207a_-_77515936.23-P1P2	GCGCTAGCGCGTTAGACGTG	2	Fam207a_-_77516034.23-P1P2|Fam207a_-_77515936.23-P1P2
Klhl34	P1P2	Klhl34_-_157817761.23-P1P2	GGGGTCGCCCGAGAGCCAGC	1	Klhl34_+_157817834.23-P1P2	GGGAGAGCAGGTCAGCTTAG	2	Klhl34_-_157817761.23-P1P2|Klhl34_+_157817834.23-P1P2
Lpar4	P1P2	Lpar4_+_106920619.23-P1P2	GGCCGCCGGGGGAACTCTTG	1	Lpar4_-_106920535.23-P1P2	GAGCGATTGGTGGTGACTAA	2	Lpar4_+_106920619.23-P1P2|Lpar4_-_106920535.23-P1P2
Zfp281	P1P2	Zfp281_+_136624665.23-P1P2	GCCAAGGGGCGGGAAGTCCG	1	Zfp281_+_136624783.23-P1P2	GGGGACTTGGAGGCGGACAG	2	Zfp281_+_136624665.23-P1P2|Zfp281_+_136624783.23-P1P2
Cit	P1P2	Cit_+_115845148.23-P1P2	GGACCCGCCCAGATCTCGGA	1	Cit_+_115844984.23-P1P2	GGGGTCCCCTGCGGAGTCTG	2	Cit_+_115845148.23-P1P2|Cit_+_115844984.23-P1P2
Nt5c1b	P1P2	Nt5c1b_-_10369736.23-P1P2	GTATGATGTGTGACAGAGTC	1	Nt5c1b_-_10369762.23-P1P2	GAAAAAACATAGGTATAATG	2	Nt5c1b_-_10369736.23-P1P2|Nt5c1b_-_10369762.23-P1P2
Tmem217	P1P2	Tmem217_-_29549835.23-P1P2	GGCTGGGAGCGGGTGACCGG	1	Tmem217_-_29549802.23-P1P2	GGGAGTGCCCACATCCAAGA	2	Tmem217_-_29549835.23-P1P2|Tmem217_-_29549802.23-P1P2
Gbp11	P1P2	Gbp11_-_105346627.23-P1P2	GTTAACTTAGCCAAGCTGGG	1	Gbp11_+_105346709.23-P1P2	GTAAACACATTTCACAGTAG	2	Gbp11_-_105346627.23-P1P2|Gbp11_+_105346709.23-P1P2
Bmp6	P1P2	Bmp6_-_38344989.23-P1P2	GAGGCAAGGCCCTGGGAGAA	1	Bmp6_+_38345037.23-P1P2	GAGGCTACCAGCCAATGGAG	2	Bmp6_-_38344989.23-P1P2|Bmp6_+_38345037.23-P1P2
Ccdc63	P1P2	Ccdc63_+_122132153.23-P1P2	GGAAGCTGGCTTGGTGGCCA	1	Ccdc63_+_122132131.23-P1P2	GTGGCCAAGGTGTTTGACAC	2	Ccdc63_+_122132153.23-P1P2|Ccdc63_+_122132131.23-P1P2
Ccdc135	P1P2	Ccdc135_+_95054978.23-P1P2	Gaccaccatagtgtgctgga	1	Ccdc135_-_95054887.23-P1P2	GGGGAGCAATAATTCTCTGG	2	Ccdc135_+_95054978.23-P1P2|Ccdc135_-_95054887.23-P1P2
Kctd13	P2	Kctd13_+_126941854.23-P2	Gaacacatcctcagaccact	1	Kctd13_+_126941724.23-P2	GACAGGTGGCACAGATGGGA	2	Kctd13_+_126941854.23-P2|Kctd13_+_126941724.23-P2
Spcs2	P1P2	Spcs2_+_99859057.23-P1P2	GAGGATGTGGCTAGCAACGG	1	Spcs2_-_99859013.23-P1P2	GAGGGCTGAAAGAGGCCGCG	2	Spcs2_+_99859057.23-P1P2|Spcs2_-_99859013.23-P1P2
Slc5a5	P1P2	Slc5a5_-_70892935.23-P1P2	GACACTTTCTCCCACATCTA	1	Slc5a5_-_70892894.23-P1P2	GGGGTGCGGGCAACGGGGTT	2	Slc5a5_-_70892935.23-P1P2|Slc5a5_-_70892894.23-P1P2
Trim46	P1P2	Trim46_+_89246026.23-P1P2	GGATGCAAGCTTCTAATAGG	1	Trim46_-_89245742.23-P1P2	GCGGACTAGTGCATCCATGA	2	Trim46_+_89246026.23-P1P2|Trim46_-_89245742.23-P1P2
Hist1h2al	ENSMUST00000091708.4	Hist1h2al_+_51203299.23-ENSMUST00000091708.4	GGGTGACTGAGCAGAAGTAA	1	Hist1h2al_-_51203260.23-ENSMUST00000091708.4	GtacactaggtaaCTACAGA	2	Hist1h2al_+_51203299.23-ENSMUST00000091708.4|Hist1h2al_-_51203260.23-ENSMUST00000091708.4
Olfr283	ENSMUST00000057386.5	Olfr283_-_98379298.23-ENSMUST00000057386.5	GGCTCCGgagataccttctt	1	Olfr283_+_98379280.23-ENSMUST00000057386.5	Ggctcccaagaaggtatctc	2	Olfr283_-_98379298.23-ENSMUST00000057386.5|Olfr283_+_98379280.23-ENSMUST00000057386.5
Mef2b	P1P2	Mef2b_-_70139533.23-P1P2	GTAGCAGGGAGTCCTTGACG	1	Mef2b_+_70139587.23-P1P2	GACACGAGATAGACGGAAGG	2	Mef2b_-_70139533.23-P1P2|Mef2b_+_70139587.23-P1P2
Ufsp1	P1P2	Ufsp1_+_137294364.23-P1P2	GAAGATGGGGAGCCCCTAGT	1	Ufsp1_-_137294537.23-P1P2	GGGAACAGAAGCCTCGGGAT	2	Ufsp1_+_137294364.23-P1P2|Ufsp1_-_137294537.23-P1P2
Rab4b	P1P2	Rab4b_-_27179019.23-P1P2	GGAGAGGGGCCGAGTCAAAA	1	Rab4b_-_27179005.23-P1P2	GCGGATTGGTGGCATGAGAG	2	Rab4b_-_27179019.23-P1P2|Rab4b_-_27179005.23-P1P2
Rps23	P1P2	Rps23_+_90923061.23-P1P2	GCCTGTACCGGGGAGTGTGT	1	Rps23_+_90923072.23-P1P2	GTCCAAGCGGCGCCTGTACC	2	Rps23_+_90923061.23-P1P2|Rps23_+_90923072.23-P1P2
Gm5127	P1P2	Gm5127_+_106582977.23-P1P2	GAAAAAGTGGCCAGCCTCTG	1	Gm5127_-_106582985.23-P1P2	GTGCCAGCAAGATTCCCCAG	2	Gm5127_+_106582977.23-P1P2|Gm5127_-_106582985.23-P1P2
Tmem30a	P1P2	Tmem30a_-_79793447.23-P1P2	Ggaaatggggagatgattga	1	Tmem30a_+_79793620.23-P1P2	GCCAACAGAAGCGTCCTCCC	2	Tmem30a_-_79793447.23-P1P2|Tmem30a_+_79793620.23-P1P2
Aacs	P1P2	Aacs_-_125475774.23-P1P2	GCGGCGGAGGGTTACAGAAG	1	Aacs_+_125475735.23-P1P2	GGCCGCGCCGCGCCTGCAAA	2	Aacs_-_125475774.23-P1P2|Aacs_+_125475735.23-P1P2
Akap17b	P1P2	Akap17b_+_36645478.23-P1P2	GTGGCCCTGGGGAAATCCTA	1	Akap17b_+_36645461.23-P1P2	GTAGGGGCGGGTCTAGTCGG	2	Akap17b_+_36645478.23-P1P2|Akap17b_+_36645461.23-P1P2
Plaa	P1P2	Plaa_-_94603283.23-P1P2	GTGACGCAGAGTGTGTGCGT	1	Plaa_-_94603337.23-P1P2	GCTTCTGCGCCCTGGATCGC	2	Plaa_-_94603283.23-P1P2|Plaa_-_94603337.23-P1P2
Prmt6	P1P2	Prmt6_+_110251198.23-P1P2	GaaccctgacAAGGGGTAAA	1	Prmt6_+_110251096.23-P1P2	GGGTGTGCCAAGATTGACTC	2	Prmt6_+_110251198.23-P1P2|Prmt6_+_110251096.23-P1P2
Pou6f2	ENSMUST00000184299.1	Pou6f2_-_18172716.23-ENSMUST00000184299.1	GGGAAGTCAGGGATGTGGTG	1	Pou6f2_-_18172762.23-ENSMUST00000184299.1	GAGGGAAGGAGCCTGAATTT	2	Pou6f2_-_18172716.23-ENSMUST00000184299.1|Pou6f2_-_18172762.23-ENSMUST00000184299.1
Mvp	P1P2	Mvp_-_127014766.23-P1P2	GAGGATGCAGCAGTAAGGGT	1	Mvp_-_127014720.23-P1P2	GTGAATCAGTGCTAACTGGC	2	Mvp_-_127014766.23-P1P2|Mvp_-_127014720.23-P1P2
Mxd1	P1P2	Mxd1_+_86669245.23-P1P2	GGGCACTTCCCCAATCGCGG	1	Mxd1_+_86669293.23-P1P2	GAAGCCCGGCCAACCGGCGG	2	Mxd1_+_86669245.23-P1P2|Mxd1_+_86669293.23-P1P2
Ccdc61	P1P2	Ccdc61_-_18910581.23-P1P2	GACGTGTGGGGAGACCTCCG	1	Ccdc61_+_18910405.23-P1P2	GAAGTGAGAAGGCCGGATGT	2	Ccdc61_-_18910581.23-P1P2|Ccdc61_+_18910405.23-P1P2
Pou3f3	P1P2	Pou3f3_+_42696701.23-P1P2	GGGGCGGGGACCCGTACTTC	1	Pou3f3_-_42696661.23-P1P2	GCAGAGTCCGCACTCGTCCG	2	Pou3f3_+_42696701.23-P1P2|Pou3f3_-_42696661.23-P1P2
Irf7	P1P2	Irf7_+_141266202.23-P1P2	GGGGATTGGGATCTGAGTAA	1	Irf7_+_141266380.23-P1P2	GGCTCCGGTACCAGGTATGT	2	Irf7_+_141266202.23-P1P2|Irf7_+_141266380.23-P1P2
Prl3a1	P1P2	Prl3a1_-_27259303.23-P1P2	GaccataagaCCATGAACTA	1	Prl3a1_+_27259333.23-P1P2	GACTCATCGTCTTGTCTAGC	2	Prl3a1_-_27259303.23-P1P2|Prl3a1_+_27259333.23-P1P2
Zfp58	P2	Zfp58_+_67500617.23-P2	GTTCTCTCATACACTCCTGT	1	Zfp58_+_67500575.23-P2	GAACAGCCCTAGCTGATTTC	2	Zfp58_+_67500617.23-P2|Zfp58_+_67500575.23-P2
Trim41	P1P2	Trim41_-_48817495.23-P1P2	GGGGCGGAGCCTGACGAAAC	1	Trim41_-_48817500.23-P1P2	GGAGCCTGACGAAACCGGCT	2	Trim41_-_48817495.23-P1P2|Trim41_-_48817500.23-P1P2
Xylt1	P1P2	Xylt1_-_117380816.23-P1P2	GGCCCGCCCTAGAACCCTGG	1	Xylt1_-_117380848.23-P1P2	GGACCCTGACCCAGGGAAAA	2	Xylt1_-_117380816.23-P1P2|Xylt1_-_117380848.23-P1P2
Mt3	P1P2	Mt3_-_94152580.23-P1P2	GCGGCTGCAGTGGCAAGGAG	1	Mt3_-_94152544.23-P1P2	GTGCAAAGATGGTACTGCGC	2	Mt3_-_94152580.23-P1P2|Mt3_-_94152544.23-P1P2
Scn8a	P1P2	Scn8a_-_100870752.23-P1P2	Ggcgcccggcagggtaggtg	1	Scn8a_-_100870747.23-P1P2	Gcgggcgcgcccggcagggt	2	Scn8a_-_100870752.23-P1P2|Scn8a_-_100870747.23-P1P2
Ino80d	P1P2	Ino80d_-_63114442.23-P1P2	GAACCCCCCCTCCCTCGCCT	1	Ino80d_+_63114427.23-P1P2	GTGTCAGCCTAGGCGAGGGA	2	Ino80d_-_63114442.23-P1P2|Ino80d_+_63114427.23-P1P2
Baalc	P1P2	Baalc_+_38933007.23-P1P2	Gtctgagcccaggaggtcct	1	Baalc_-_38933033.23-P1P2	Ggacctcctgggctcagaaa	2	Baalc_+_38933007.23-P1P2|Baalc_-_38933033.23-P1P2
Rbm10	P1P2	Rbm10_-_20617633.23-P1P2	GTAAAGAGCGGGCCTCTTAG	1	Rbm10_+_20617007.23-P1P2	GTAGGGGCCAATCTGGACCA	2	Rbm10_-_20617633.23-P1P2|Rbm10_+_20617007.23-P1P2
Iscu	P2	Iscu_+_113773534.23-P2	GGGAGTGTCTTGTACATCTG	1	Iscu_+_113773636.23-P2	GTCTCCCGCTAGTTACCAGG	2	Iscu_+_113773534.23-P2|Iscu_+_113773636.23-P2
Creb3l3	P1P2	Creb3l3_-_81092779.23-P1P2	GAGAGCAAAGTCTGGGGTGT	1	Creb3l3_+_81092795.23-P1P2	GAAACAGTAGCTGTAAGTAG	2	Creb3l3_-_81092779.23-P1P2|Creb3l3_+_81092795.23-P1P2
Lipf	P1P2	Lipf_-_33960862.23-P1P2	GGATCAGAGTAGCCAGTGGT	1	Lipf_-_33961132.23-P1P2	GTAGGTTTGTGCTTTAATAT	2	Lipf_-_33960862.23-P1P2|Lipf_-_33961132.23-P1P2
Enox2	P1P2	Enox2_+_49288303.23-P1P2	GATGCCCTAGCCAATGGGAG	1	Enox2_+_49288395.23-P1P2	GCAAATATTGGATACTTCTG	2	Enox2_+_49288303.23-P1P2|Enox2_+_49288395.23-P1P2
Zbtb43	P1P2	Zbtb43_-_33468692.23-P1P2	GGGTACTGGCGTCTGCGCAA	1	Zbtb43_-_33468645.23-P1P2	GTGCTCCAGGCGTGCTTTCG	2	Zbtb43_-_33468692.23-P1P2|Zbtb43_-_33468645.23-P1P2
Ttll11	P1P2	Ttll11_-_35979817.23-P1P2	GTCGGGACGGGGCCCCGCAA	1	Ttll11_+_35979868.23-P1P2	GGCCACCTCTGTGACAGGCC	2	Ttll11_-_35979817.23-P1P2|Ttll11_+_35979868.23-P1P2
Cyp2c44	P1P2	Cyp2c44_-_44029375.23-P1P2	GCTGGAGCCTGAGATCAAGA	1	Cyp2c44_-_44029483.23-P1P2	GCATGCGCACATTATtatgt	2	Cyp2c44_-_44029375.23-P1P2|Cyp2c44_-_44029483.23-P1P2
Lztfl1	P1P2	Lztfl1_-_123717675.23-P1P2	GGGCTCTCAGTGTCACGTGA	1	Lztfl1_+_123717772.23-P1P2	GTCTCTGTTGCCATTGGCAA	2	Lztfl1_-_123717675.23-P1P2|Lztfl1_+_123717772.23-P1P2
Adat3	P1P2	Adat3_-_80602702.23-P1P2	GGTCTCAAAGTGTCACAAAG	1	Adat3_+_80602640.23-P1P2	GGAGGCAGAAGGAGACTCTA	2	Adat3_-_80602702.23-P1P2|Adat3_+_80602640.23-P1P2
Amph	P1P2	Amph_+_18948235.23-P1P2	GAGCGGATGTGCGGCCACTA	1	Amph_+_18948092.23-P1P2	GGGCAGCTAGGGGTGAGAGA	2	Amph_+_18948235.23-P1P2|Amph_+_18948092.23-P1P2
C1rl	P1P2	C1rl_-_124492857.23-P1P2	GTCCACTAATAGCAAGCTGG	1	C1rl_+_124493042.23-P1P2	GGGAAATGAGTTGAGACTCT	2	C1rl_-_124492857.23-P1P2|C1rl_+_124493042.23-P1P2
Dcakd	P2	Dcakd_+_103028360.23-P2	GGAGGAGCGGGCAGCAATTC	1	Dcakd_-_103028314.23-P2	GGCCCCGCGACCACCCTATA	2	Dcakd_+_103028360.23-P2|Dcakd_-_103028314.23-P2
Clec18a	P1P2	Clec18a_+_111082053.23-P1P2	GAGGAGTGGAAGCTGTCCAT	1	Clec18a_-_111081937.23-P1P2	GGGCCCCTGCTAATCATTGT	2	Clec18a_+_111082053.23-P1P2|Clec18a_-_111081937.23-P1P2
Wnt10b	P1P2	Wnt10b_+_98778675.23-P1P2	GGGGACTGACAGGAGGTCTT	1	Wnt10b_+_98778695.23-P1P2	GTACCAGAAAAGGGGAGCAT	2	Wnt10b_+_98778675.23-P1P2|Wnt10b_+_98778695.23-P1P2
Vmn1r85	ENSMUST00000094829.1	Vmn1r85_+_13085367.23-ENSMUST00000094829.1	GCCTAGAATGGAGTACCCAG	1	Vmn1r85_-_13085364.23-ENSMUST00000094829.1	GGGTATTTCAGGTTCAGATG	2	Vmn1r85_+_13085367.23-ENSMUST00000094829.1|Vmn1r85_-_13085364.23-ENSMUST00000094829.1
4930523C07Rik	P1P2	4930523C07Rik_+_160044175.23-P1P2	GAAGGGCTGGGGTGTCTAAA	1	4930523C07Rik_-_160044332.23-P1P2	GGGCTCTGGCGTCCTGAAGG	2	4930523C07Rik_+_160044175.23-P1P2|4930523C07Rik_-_160044332.23-P1P2
Pola1	P1P2	Pola1_-_93632341.23-P1P2	GGGAACCTCGGCGAGGACCG	1	Pola1_-_93632278.23-P1P2	GCCGCCCCCGGCCTTCCCGC	2	Pola1_-_93632341.23-P1P2|Pola1_-_93632278.23-P1P2
Tex33	P1P2	Tex33_-_78396209.23-P1P2	Gtctgtctagggaaaggtgg	1	Tex33_-_78396144.23-P1P2	GGGGCTCAGATCAAGCATAA	2	Tex33_-_78396209.23-P1P2|Tex33_-_78396144.23-P1P2
Lrmp	P1P2	Lrmp_-_145121698.23-P1P2	GCCTGCGCAGAGGAAGTGCA	1	Lrmp_-_145121714.23-P1P2	GGCAGGGCGCAAGGGTGCAG	2	Lrmp_-_145121698.23-P1P2|Lrmp_-_145121714.23-P1P2
Mrpl10	P1P2	Mrpl10_-_97041408.23-P1P2	GGACGCCAGGTCTGACGGAA	1	Mrpl10_-_97041199.23-P1P2	GTGGTTGAACCCAGGTTGGA	2	Mrpl10_-_97041408.23-P1P2|Mrpl10_-_97041199.23-P1P2
Dusp11	P1P2	Dusp11_+_85961736.23-P1P2	GGCAGCACAGTCGAAACCGA	1	Dusp11_+_85961937.23-P1P2	Gcctctgccctgcacgacag	2	Dusp11_+_85961736.23-P1P2|Dusp11_+_85961937.23-P1P2
Odf3	P1P2	Odf3_-_140847608.23-P1P2	GCCCCTAAAGGAGAAGTCCA	1	Odf3_-_140847613.23-P1P2	GAAAGGAGAAGTCCACGGAG	2	Odf3_-_140847608.23-P1P2|Odf3_-_140847613.23-P1P2
Shc1	P2	Shc1_-_89418539.23-P2	GAAAGCAGACGGGTAAAGGA	1	Shc1_-_89418552.23-P2	GAAAGGAGGGACAGCGAGGT	2	Shc1_-_89418539.23-P2|Shc1_-_89418552.23-P2
Iqgap2	P1P2	Iqgap2_-_95892127.23-P1P2	GCGCCTCCCGCGAGAGGAAG	1	Iqgap2_+_95892035.23-P1P2	GCGGCGGCGCGCTCCCACCG	2	Iqgap2_-_95892127.23-P1P2|Iqgap2_+_95892035.23-P1P2
Pard3b	P1P2	Pard3b_+_61638619.23-P1P2	GGATCTGGGAGCTACCACAG	1	Pard3b_+_61638882.23-P1P2	GggcgcgcggggccAGAGTT	2	Pard3b_+_61638619.23-P1P2|Pard3b_+_61638882.23-P1P2
Sowaha	P1P2	Sowaha_-_53480283.23-P1P2	GCCACTCCCGGTTGCTAGGT	1	Sowaha_+_53480290.23-P1P2	GATACGCTGCAACATCCCCA	2	Sowaha_-_53480283.23-P1P2|Sowaha_+_53480290.23-P1P2
Cdh5	P1P2	Cdh5_-_104101497.23-P1P2	GCCAAGGCTTCCACGGGCCC	1	Cdh5_+_104101516.23-P1P2	GGATAGGCAAGCCCTACGGT	2	Cdh5_-_104101497.23-P1P2|Cdh5_+_104101516.23-P1P2
Hoxc8	P1P2	Hoxc8_-_102990233.23-P1P2	GTGGCCTTGTCCATTAGCTA	1	Hoxc8_+_102990200.23-P1P2	GGACAAGGCCAGCTTTTCCA	2	Hoxc8_-_102990233.23-P1P2|Hoxc8_+_102990200.23-P1P2
Nptx2	P1P2	Nptx2_+_144545772.23-P1P2	GGGCGTTCGCGTCACGCGGA	1	Nptx2_+_144545633.23-P1P2	GAAACGGTCAGAGAAAGCGT	2	Nptx2_+_144545772.23-P1P2|Nptx2_+_144545633.23-P1P2
2700089E24Rik	P1P2	2700089E24Rik_+_133105101.23-P1P2	GTTGCAAGGATCAAAGGTCG	1	2700089E24Rik_+_133105205.23-P1P2	GGGCAGTTATGTAACTGCTA	2	2700089E24Rik_+_133105101.23-P1P2|2700089E24Rik_+_133105205.23-P1P2
Prkcsh	P1P2	Prkcsh_+_22002834.23-P1P2	GGAAGTGTAGCGCTTAATGG	1	Prkcsh_-_22002821.23-P1P2	GTAACCCGCCACTCCCAAGA	2	Prkcsh_+_22002834.23-P1P2|Prkcsh_-_22002821.23-P1P2
Acrbp	P1P2	Acrbp_+_125049813.23-P1P2	GGGGCCATGTCAGGAGCCAC	1	Acrbp_-_125049692.23-P1P2	GCAGACCCGGGGTTACAGCT	2	Acrbp_+_125049813.23-P1P2|Acrbp_-_125049692.23-P1P2
Ces1a	P1P2	Ces1a_-_93048501.23-P1P2	GGGTCTGAGACCCTCAGAAA	1	Ces1a_-_93048439.23-P1P2	GTCCACCTTGAGCTTCCCAA	2	Ces1a_-_93048501.23-P1P2|Ces1a_-_93048439.23-P1P2
Sfmbt2	P2	Sfmbt2_-_10372148.23-P2	GCACTTGTGGAGGGAGTTGA	1	Sfmbt2_-_10372309.23-P2	GTCACCTTGTGGGCGGGAGA	2	Sfmbt2_-_10372148.23-P2|Sfmbt2_-_10372309.23-P2
Lrp10	P1P2	Lrp10_+_54464017.23-P1P2	GTTCAGATGTGTCTTGTCAA	1	Lrp10_-_54464072.23-P1P2	GCGGCAGCCAAAGGGCGATC	2	Lrp10_+_54464017.23-P1P2|Lrp10_-_54464072.23-P1P2
Arhgap20	P1P2	Arhgap20_+_51765166.23-P1P2	GACCTTGCGAGGTGCCTCCG	1	Arhgap20_-_51765193.23-P1P2	GAGGCACCTCGCAAGGTTAG	2	Arhgap20_+_51765166.23-P1P2|Arhgap20_-_51765193.23-P1P2
Nek1	P1P2	Nek1_+_60993072.23-P1P2	Ggggctggactaagagtgat	1	Nek1_+_60993068.23-P1P2	Gtggactaagagtgatgggg	2	Nek1_+_60993072.23-P1P2|Nek1_+_60993068.23-P1P2
Gm609	ENSMUST00000114585.2	Gm609_+_45493110.23-ENSMUST00000114585.2	Gctcaagacctccagctcaa	1	Gm609_-_45493179.23-ENSMUST00000114585.2	Gtcatgtgaaacaaataagt	2	Gm609_+_45493110.23-ENSMUST00000114585.2|Gm609_-_45493179.23-ENSMUST00000114585.2
Olfr1331	ENSMUST00000094831.1	Olfr1331_-_118868696.23-ENSMUST00000094831.1	Gaataaccaccccagtcttc	1	Olfr1331_-_118868720.23-ENSMUST00000094831.1	GtcTGCAGATACCAATCTTC	2	Olfr1331_-_118868696.23-ENSMUST00000094831.1|Olfr1331_-_118868720.23-ENSMUST00000094831.1
Tgfbi	P1P2	Tgfbi_-_56609476.23-P1P2	GTGAGCTGGGCGGTGCAGGA	1	Tgfbi_-_56609500.23-P1P2	GCGGGTGCTTAGTAGTGGCG	2	Tgfbi_-_56609476.23-P1P2|Tgfbi_-_56609500.23-P1P2
Pgap2	P2	Pgap2_-_102210381.23-P2	Ggaaaggagggacgatgggg	1	Pgap2_-_102210413.23-P2	GCCCACTCCCTCTGCCGCAA	2	Pgap2_-_102210381.23-P2|Pgap2_-_102210413.23-P2
Gm7694	ENSMUST00000179801.1	Gm7694_+_170306531.23-ENSMUST00000179801.1	GTAAAGGGGGCACAGAATAT	1	Gm7694_+_170306546.23-ENSMUST00000179801.1	GAAGATGGAGTTCTTGTAAA	2	Gm7694_+_170306531.23-ENSMUST00000179801.1|Gm7694_+_170306546.23-ENSMUST00000179801.1
Snrpd3	P1P2	Snrpd3_+_75517837.23-P1P2	GGTAACCCTGAGTACTGTAG	1	Snrpd3_+_75517865.23-P1P2	GCAATCCTGGAGCCCAACAA	2	Snrpd3_+_75517837.23-P1P2|Snrpd3_+_75517865.23-P1P2
Trim52	P1P2	Trim52_+_106106001.23-P1P2	GGTGCCAGGTCAGAGGTGAA	1	Trim52_+_106106008.23-P1P2	GGGAGAGCGTGCCAGGTCAG	2	Trim52_+_106106001.23-P1P2|Trim52_+_106106008.23-P1P2
Zfp866	P2	Zfp866_+_69791326.23-P2	GCCGGCCGCAATCGCGACCC	1	Zfp866_-_69791315.23-P2	GCTGGCGGGGCCCGGGACAA	2	Zfp866_+_69791326.23-P2|Zfp866_-_69791315.23-P2
Lgi2	P1P2	Lgi2_+_52566364.23-P1P2	GAGGCGCGGGTGCTGATGTC	1	Lgi2_+_52566495.23-P1P2	GTGCGGGTCCCTGCTCCCAG	2	Lgi2_+_52566364.23-P1P2|Lgi2_+_52566495.23-P1P2
Camp	P1P2	Camp_+_109849751.23-P1P2	GCTAAGGAATAGACAGTCAC	1	Camp_-_109849565.23-P1P2	GTGCCGGCCAGGGTGTGGGG	2	Camp_+_109849751.23-P1P2|Camp_-_109849565.23-P1P2
Fbxo27	P1P2	Fbxo27_-_28692977.23-P1P2	GCCTAAGCCGGAAGGAGGTG	1	Fbxo27_-_28693821.23-P1P2	GTGTAGGCTGTGAGACCAGA	2	Fbxo27_-_28692977.23-P1P2|Fbxo27_-_28693821.23-P1P2
Kansl3	P1P2	Kansl3_-_36369308.23-P1P2	GAAAGCGCGCGCGACTCCCG	1	Kansl3_-_36369279.23-P1P2	GGGGACCTGGCTAACCTGTG	2	Kansl3_-_36369308.23-P1P2|Kansl3_-_36369279.23-P1P2
Psd2	P1P2	Psd2_+_35964934.23-P1P2	GGGCGCGCCCGCAGCCTGGA	1	Psd2_-_35964885.23-P1P2	GTGGGCGCCCCGCACAAGGT	2	Psd2_+_35964934.23-P1P2|Psd2_-_35964885.23-P1P2
Ildr2	P1P2	Ildr2_-_166254011.23-P1P2	GCCACATGGTCCGCCCTCTG	1	Ildr2_+_166254063.23-P1P2	GACCGCCCGCCAAAGTTTCT	2	Ildr2_-_166254011.23-P1P2|Ildr2_+_166254063.23-P1P2
Sv2a	P1P2	Sv2a_+_96181006.23-P1P2	GGAACTGGAGGGGACTGTCA	1	Sv2a_+_96181123.23-P1P2	GCCCCCGCGCCAGTGAGCAG	2	Sv2a_+_96181006.23-P1P2|Sv2a_+_96181123.23-P1P2
Olfr891	ENSMUST00000062535.1	Olfr891_-_38180911.23-ENSMUST00000062535.1	GAAAAAGGACAGTTGGGTGC	1	Olfr891_-_38180873.23-ENSMUST00000062535.1	GGTGAAGGGTCACATTAGCA	2	Olfr891_-_38180911.23-ENSMUST00000062535.1|Olfr891_-_38180873.23-ENSMUST00000062535.1
Mrps18a	P1	Mrps18a_+_46110807.23-P1	GTAGACCTGTCAGGACAGAT	1	Mrps18a_-_46110881.23-P1	GAAAAACTAAGGAAACCGGG	2	Mrps18a_+_46110807.23-P1|Mrps18a_-_46110881.23-P1
Nphs2	P1P2	Nphs2_+_156310534.23-P1P2	GGACCTGAATGGGAGATTCT	1	Nphs2_+_156310477.23-P1P2	GACCACAGCAGGCTCTGCTT	2	Nphs2_+_156310534.23-P1P2|Nphs2_+_156310477.23-P1P2
Oprk1	P1P2	Oprk1_-_5588367.23-P1P2	GTTAGTGAGCCTTGGCAGAG	1	Oprk1_-_5588441.23-P1P2	GGGCGGGGATAGGCTGAGAT	2	Oprk1_-_5588367.23-P1P2|Oprk1_-_5588441.23-P1P2
Serpinb10	ENSMUST00000182198.1	Serpinb10_-_107535315.23-ENSMUST00000182198.1	GCATTATATGAGCTCAGTCA	1	Serpinb10_+_107534996.23-ENSMUST00000182198.1	GGACAAGGATAGAACTAGGA	2	Serpinb10_-_107535315.23-ENSMUST00000182198.1|Serpinb10_+_107534996.23-ENSMUST00000182198.1
Gprin1	P1P2	Gprin1_+_54749827.23-P1P2	GGAAGACCGGGGTTTCGGTG	1	Gprin1_+_54749936.23-P1P2	GTGGGCAGCAGCGAGACAAA	2	Gprin1_+_54749827.23-P1P2|Gprin1_+_54749936.23-P1P2
Ppp1r10	P1P2	Ppp1r10_-_35916810.23-P1P2	GAAGAGGGGAACCGAGGGAA	1	Ppp1r10_-_35916483.23-P1P2	GCGGCTGCTCACATGTCTAA	2	Ppp1r10_-_35916810.23-P1P2|Ppp1r10_-_35916483.23-P1P2
Dpep1	P2	Dpep1_+_123186171.23-P2	GTCTCTGGGTCAGCCGTCTG	1	Dpep1_+_123186200.23-P2	GGTAACGCAGAGCATCCGGT	2	Dpep1_+_123186171.23-P2|Dpep1_+_123186200.23-P2
Sgtb	P1P2	Sgtb_+_104109604.23-P1P2	GTGGGCCTGCAGCACGTGGG	1	Sgtb_+_104109628.23-P1P2	GaggggcggggcCACGGCGT	2	Sgtb_+_104109604.23-P1P2|Sgtb_+_104109628.23-P1P2
Exosc5	P1P2	Exosc5_-_25659068.23-P1P2	GTGGCTATGCCAGAATTGGG	1	Exosc5_-_25659008.23-P1P2	GCCGGAGCCCTGAGCAAAAT	2	Exosc5_-_25659068.23-P1P2|Exosc5_-_25659008.23-P1P2
Bean1	P1P2	Bean1_+_104170427.23-P1P2	GCACCAGGAGGACTTGTGAA	1	Bean1_+_104170458.23-P1P2	GggggAGGCCGAGGGATGTA	2	Bean1_+_104170427.23-P1P2|Bean1_+_104170458.23-P1P2
Mtr	P1P2	Mtr_-_12258440.23-P1P2	GATCAGTGGTGGAGTATCAA	1	Mtr_-_12258244.23-P1P2	GGCTCCTCGCCGCCGTGTAT	2	Mtr_-_12258440.23-P1P2|Mtr_-_12258244.23-P1P2
Dusp15	P1P2	Dusp15_-_152951709.23-P1P2	GGGACAACGGCAGCTTGTTG	1	Dusp15_-_152951737.23-P1P2	GGGGACGCCACCTCCGGAGG	2	Dusp15_-_152951709.23-P1P2|Dusp15_-_152951737.23-P1P2
Spi1	ENSMUST00000002180.7	Spi1_-_91095923.23-ENSMUST00000002180.7	GAGCACGTTGCTAACCGCGA	1	Spi1_-_91095870.23-ENSMUST00000002180.7	GCAAACTGTTAGCAGATGGA	2	Spi1_-_91095923.23-ENSMUST00000002180.7|Spi1_-_91095870.23-ENSMUST00000002180.7
Sox2	P1P2	Sox2_+_34649963.23-P1P2	GGGGCTGTCAGGGAATAAAT	1	Sox2_+_34649797.23-P1P2	GGGCCCGCAGCCGGCCGCTG	2	Sox2_+_34649963.23-P1P2|Sox2_+_34649797.23-P1P2
Olfr1195	ENSMUST00000099818.1	Olfr1195_+_88683953.23-ENSMUST00000099818.1	GAAAGTCAGCATTTTTGTTG	1	Olfr1195_+_88684062.23-ENSMUST00000099818.1	GTACATAAGTCATTGCCAAC	2	Olfr1195_+_88683953.23-ENSMUST00000099818.1|Olfr1195_+_88684062.23-ENSMUST00000099818.1
Atp11a	P1P2	Atp11a_+_12756904.23-P1P2	GTCCCTGCGGGACTGGGGGA	1	Atp11a_+_12756862.23-P1P2	GCGCCCCCGCGTGGCTCGTC	2	Atp11a_+_12756904.23-P1P2|Atp11a_+_12756862.23-P1P2
Nol10	P1P2	Nol10_+_17348338.23-P1P2	GGGTCCGGGGAGATGTGCTC	1	Nol10_+_17348359.23-P1P2	GGCACTAGAGGCGGCAAGAG	2	Nol10_+_17348338.23-P1P2|Nol10_+_17348359.23-P1P2
Nr3c2	P1	Nr3c2_+_76902249.23-P1	GCCGGGGCGGGCCAAGAGGA	1	Nr3c2_+_76902228.23-P1	GGGGCGGGCGAAAGCCCCGA	2	Nr3c2_+_76902249.23-P1|Nr3c2_+_76902228.23-P1
Zfp438	P1P2	Zfp438_-_5334605.23-P1P2	GCCAGAAGCGAGAAGGTCGG	1	Zfp438_-_5334667.23-P1P2	GTTCTCGCCCGGACTTGGGG	2	Zfp438_-_5334605.23-P1P2|Zfp438_-_5334667.23-P1P2
Kcnmb1	P1P2	Kcnmb1_-_33963092.23-P1P2	GAGTCCCCAACAGCAGCTGA	1	Kcnmb1_-_33963209.23-P1P2	GGGGACTGAGACTGCTTCCC	2	Kcnmb1_-_33963092.23-P1P2|Kcnmb1_-_33963209.23-P1P2
Olfr1044	ENSMUST00000099906.1	Olfr1044_+_86171986.23-ENSMUST00000099906.1	GGTTATAGGGTTTGTAGAGA	1	Olfr1044_+_86171999.23-ENSMUST00000099906.1	GAGAAAAGAATTGCGTTATA	2	Olfr1044_+_86171986.23-ENSMUST00000099906.1|Olfr1044_+_86171999.23-ENSMUST00000099906.1
Brat1	P1P2	Brat1_-_140704843.23-P1P2	GAGGGGTGGGGCCTCGTTGA	1	Brat1_-_140704887.23-P1P2	GGAGGTGGAGCCAATTCCCG	2	Brat1_-_140704843.23-P1P2|Brat1_-_140704887.23-P1P2
Ebf3	P1P2	Ebf3_+_137314567.23-P1P2	Ggcgccgtcaggcagtcagt	1	Ebf3_-_137314495.23-P1P2	GTGTCAGAGGGTGACGTCGG	2	Ebf3_+_137314567.23-P1P2|Ebf3_-_137314495.23-P1P2
Sumo2	P1P2	Sumo2_-_115536416.23-P1P2	GCAGGCGCCCGCCAGGTCGG	1	Sumo2_+_115536402.23-P1P2	GCCTCTTCCCGCCGACCTGG	2	Sumo2_-_115536416.23-P1P2|Sumo2_+_115536402.23-P1P2
Hoxa10	P2	Hoxa10_+_52234998.23-P2	GGGAAACTCTGGCTCGGGAT	1	Hoxa10_-_52235192.23-P2	GCTGCCTCAAAGTGGAGGTT	2	Hoxa10_+_52234998.23-P2|Hoxa10_-_52235192.23-P2
Fsd1	P1P2	Fsd1_+_55986362.23-P1P2	GAAGCCCTCAGGCGGAAGGC	1	Fsd1_-_55986339.23-P1P2	GAGTCCTGAGTTCACAAGAC	2	Fsd1_+_55986362.23-P1P2|Fsd1_-_55986339.23-P1P2
Olfr447	ENSMUST00000055763.3	Olfr447_-_42911428.23-ENSMUST00000055763.3	GTTAACAAGTCAAGAATATT	1	Olfr447_+_42911218.23-ENSMUST00000055763.3	GCAGTTCAGTTGAAGCAGAC	2	Olfr447_-_42911428.23-ENSMUST00000055763.3|Olfr447_+_42911218.23-ENSMUST00000055763.3
Pmpcb	P1P2	Pmpcb_-_21737025.23-P1P2	GAACTGGGGAGGGAGTCAAA	1	Pmpcb_-_21737032.23-P1P2	GGAGGGAGTCAAAGGGTGAA	2	Pmpcb_-_21737025.23-P1P2|Pmpcb_-_21737032.23-P1P2
Ankle2	P1P2	Ankle2_-_110230884.23-P1P2	GCAGCAGCGACAACTCGGGG	1	Ankle2_+_110230936.23-P1P2	GGGCGCGGGCAGCTTGGTCG	2	Ankle2_-_110230884.23-P1P2|Ankle2_+_110230936.23-P1P2
Slc15a3	P1P2	Slc15a3_-_10842385.23-P1P2	GAGAGGGCAGGCAACAGTCC	1	Slc15a3_+_10842225.23-P1P2	GTAGCTGGGGACTTTGGATG	2	Slc15a3_-_10842385.23-P1P2|Slc15a3_+_10842225.23-P1P2
Chst9	ENSMUST00000053017.6	Chst9_-_15718276.23-ENSMUST00000053017.6	GGAACTGGGTGTCTTATCCG	1	Chst9_+_15718299.23-ENSMUST00000053017.6	GTTACCCTGTGCTTTATTAT	2	Chst9_-_15718276.23-ENSMUST00000053017.6|Chst9_+_15718299.23-ENSMUST00000053017.6
Rxrg	P2	Rxrg_+_167598201.23-P2	GTGGGTCAGGAGAAAAGGAG	1	Rxrg_+_167598271.23-P2	GAGTCCCCAGAGGTTCCTAC	2	Rxrg_+_167598201.23-P2|Rxrg_+_167598271.23-P2
Slc46a1	P1P2	Slc46a1_-_78465546.23-P1P2	GTTCCGACGCCCAGGAAGGA	1	Slc46a1_+_78465591.23-P1P2	GGTCGTCCAAACAATCCCTG	2	Slc46a1_-_78465546.23-P1P2|Slc46a1_+_78465591.23-P1P2
Aida	ENSMUST00000109166.2	Aida_+_183296879.23-ENSMUST00000109166.2	GTAAGCTTGTCAGGAAGCGA	1	Aida_-_183296759.23-ENSMUST00000109166.2	GCGGACGCTGGGCGAGGACT	2	Aida_+_183296879.23-ENSMUST00000109166.2|Aida_-_183296759.23-ENSMUST00000109166.2
Dio1	P1P2	Dio1_-_107307208.23-P1P2	GTGGAGCTGGACAAAGGTGC	1	Dio1_+_107307295.23-P1P2	GAGAGAGAGCTCTGTGCCCT	2	Dio1_-_107307208.23-P1P2|Dio1_+_107307295.23-P1P2
Nlrp12	P1P2	Nlrp12_+_3249700.23-P1P2	GTAGCAGAGAAGCAATGGGT	1	Nlrp12_+_3249831.23-P1P2	GAGCGTGGTTGTTTTGTCAA	2	Nlrp12_+_3249700.23-P1P2|Nlrp12_+_3249831.23-P1P2
Il12rb2	P1P2	Il12rb2_-_67376337.23-P1P2	GGGAACTTGCCCAGTGCAGG	1	Il12rb2_-_67376301.23-P1P2	GGCACCCAGCGTGCTTAGTG	2	Il12rb2_-_67376337.23-P1P2|Il12rb2_-_67376301.23-P1P2
Celf3	P1P2	Celf3_-_94478177.23-P1P2	GTGGGGCAGAAAGGGAGTCA	1	Celf3_-_94478169.23-P1P2	GTGCTCTTCTGGGGCAGAAA	2	Celf3_-_94478177.23-P1P2|Celf3_-_94478169.23-P1P2
Rsf1	P1P2	Rsf1_-_97579685.23-P1P2	GGAAGAGGGCGGAAAGTGAA	1	Rsf1_+_97579546.23-P1P2	GAAGCGGGGCGGAGAGGTTG	2	Rsf1_-_97579685.23-P1P2|Rsf1_+_97579546.23-P1P2
Dnaaf2	ENSMUST00000021356.5	Dnaaf2_-_69198471.23-ENSMUST00000021356.5	GGGGAGGAGGGGCAGCGATC	1	Dnaaf2_+_69198588.23-ENSMUST00000021356.5	GAGACACAGCGCTGAAGATG	2	Dnaaf2_-_69198471.23-ENSMUST00000021356.5|Dnaaf2_+_69198588.23-ENSMUST00000021356.5
Mrps7	P1P2	Mrps7_-_115604011.23-P1P2	GACCGCGTCGGAGGCCGCGA	1	Mrps7_+_115603863.23-P1P2	GGGACCGGGCGGCTGCAATA	2	Mrps7_-_115604011.23-P1P2|Mrps7_+_115603863.23-P1P2
Reg3g	P1P2	Reg3g_-_78468975.23-P1P2	GCAGGGAGGTAGGTGGTGCT	1	Reg3g_+_78468994.23-P1P2	GAGAAACTCCCGCTTTTGAT	2	Reg3g_-_78468975.23-P1P2|Reg3g_+_78468994.23-P1P2
Stxbp1	P1P2	Stxbp1_+_32847310.23-P1P2	GAGCGCGCGGGTGACGATGA	1	Stxbp1_+_32847369.23-P1P2	GCCGGAGCCTGCATCCCGGA	2	Stxbp1_+_32847310.23-P1P2|Stxbp1_+_32847369.23-P1P2
Pitx3	P1P2	Pitx3_+_46148462.23-P1P2	GGGGCGGCGCATCTGGAAAG	1	Pitx3_+_46148611.23-P1P2	GCAGTCCGGGCCACGTGGGG	2	Pitx3_+_46148462.23-P1P2|Pitx3_+_46148611.23-P1P2
Nup214	P1P2	Nup214_-_31974202.23-P1P2	GGGGAAGCATCGAGAGTCTC	1	Nup214_+_31974366.23-P1P2	GTGTGCTCGGAGGCAGTCGA	2	Nup214_-_31974202.23-P1P2|Nup214_+_31974366.23-P1P2
Mdn1	P1P2	Mdn1_-_32656989.23-P1P2	GGCGCCGGCAGCTCCTCGTT	1	Mdn1_+_32657053.23-P1P2	GGCGCCACTGCTAGTAGGAA	2	Mdn1_-_32656989.23-P1P2|Mdn1_+_32657053.23-P1P2
Carns1	P2	Carns1_+_4170186.23-P2	GTGTCTAAGGGGTACTTAGA	1	Carns1_+_4170198.23-P2	GAAGATGCACAGGTGTCTAA	2	Carns1_+_4170186.23-P2|Carns1_+_4170198.23-P2
Chmp4c	P1P2	Chmp4c_-_10366888.23-P1P2	GCTCCCGGGTAGTTATTCGA	1	Chmp4c_+_10366824.23-P1P2	GCACCGCCCTCTGGGAGTCA	2	Chmp4c_-_10366888.23-P1P2|Chmp4c_+_10366824.23-P1P2
Olfr282	ENSMUST00000075851.3	Olfr282_-_98437062.23-ENSMUST00000075851.3	Gggagctagaaaagggccca	1	Olfr282_-_98437330.23-ENSMUST00000075851.3	Ggtaggggagaagagataga	2	Olfr282_-_98437062.23-ENSMUST00000075851.3|Olfr282_-_98437330.23-ENSMUST00000075851.3
Rpgrip1	P1P2	Rpgrip1_-_52110759.23-P1P2	GCGTTAGTGGAGAAAGTCCT	1	Rpgrip1_+_52110713.23-P1P2	GAACCTGAGAAATACATGAT	2	Rpgrip1_-_52110759.23-P1P2|Rpgrip1_+_52110713.23-P1P2
Cyb5d1	P1P2	Cyb5d1_-_69395982.23-P1P2	GCCAGCGCCGGGGTTAGCGT	1	Cyb5d1_+_69395710.23-P1P2	GAGGTCCCTACATGCCTACT	2	Cyb5d1_-_69395982.23-P1P2|Cyb5d1_+_69395710.23-P1P2
Rcc1	P1P2	Rcc1_-_132345800.23-P1P2	GCCACCGCGGGAAGTGCGAG	1	Rcc1_-_132345788.23-P1P2	GGGCCCCTGGCGGCCACCGC	2	Rcc1_-_132345800.23-P1P2|Rcc1_-_132345788.23-P1P2
BC007180	ENSMUST00000098496.3	BC007180_+_154761934.23-ENSMUST00000098496.3	GTAACAACATGGACCATGAT	1	BC007180_+_154762001.23-ENSMUST00000098496.3	GAGATTTTATATGTCATCAA	2	BC007180_+_154761934.23-ENSMUST00000098496.3|BC007180_+_154762001.23-ENSMUST00000098496.3
B430306N03Rik	P1P2	B430306N03Rik_-_48315984.23-P1P2	GGTAGGAGGGTCTAACCTGA	1	B430306N03Rik_-_48316111.23-P1P2	GAGGAAGTGGCGGAACTGGC	2	B430306N03Rik_-_48315984.23-P1P2|B430306N03Rik_-_48316111.23-P1P2
Fam65b	P2	Fam65b_-_24638537.23-P2	GCAGGCAGACGATCAGCTGG	1	Fam65b_-_24638519.23-P2	GGTCCCAGAGCCTGACGTGC	2	Fam65b_-_24638537.23-P2|Fam65b_-_24638519.23-P2
Slc37a3	P1P2	Slc37a3_+_39377682.23-P1P2	GAGCTCTGGCCACATCCCGC	1	Slc37a3_+_39377757.23-P1P2	GCTCGCAGGTAAAGCGGCAC	2	Slc37a3_+_39377682.23-P1P2|Slc37a3_+_39377757.23-P1P2
Pstpip2	P1P2	Pstpip2_-_77794452.23-P1P2	GCGGCCGCGCCCTAGGGTCA	1	Pstpip2_+_77794439.23-P1P2	GGCCACCCGCCCTGACCCTA	2	Pstpip2_-_77794452.23-P1P2|Pstpip2_+_77794439.23-P1P2
Adam19	P1P2	Adam19_+_46055833.23-P1P2	GTCAGGTGAAGGACACCCAG	1	Adam19_+_46055920.23-P1P2	GGAGGCGCCACGCGGAGGAG	2	Adam19_+_46055833.23-P1P2|Adam19_+_46055920.23-P1P2
Oog2	ENSMUST00000080405.1	Oog2_+_144190511.23-ENSMUST00000080405.1	GCAGGCAGAGAGTCAACAAC	1	Oog2_+_144190529.23-ENSMUST00000080405.1	GAGAGGAAGATTCTTAGGCC	2	Oog2_+_144190511.23-ENSMUST00000080405.1|Oog2_+_144190529.23-ENSMUST00000080405.1
Grxcr2	P1P2	Grxcr2_-_41999212.23-P1P2	GCACGGTTATGTGGAGTGGA	1	Grxcr2_-_41999203.23-P1P2	GGCAGGTGATCACGGTTATG	2	Grxcr2_-_41999212.23-P1P2|Grxcr2_-_41999203.23-P1P2
Atp5h	P1P2	Atp5h_+_115420117.23-P1P2	GgggccggccgACTCCTCGG	1	Atp5h_+_115420091.23-P1P2	GAGCCGGGCCGGCCCATCGG	2	Atp5h_+_115420117.23-P1P2|Atp5h_+_115420091.23-P1P2
Trim28	P1P2	Trim28_+_13024183.23-P1P2	GCCCACCGCACGGTGCACCC	1	Trim28_+_13024051.23-P1P2	GAAGAGGGGCGGGACAATAC	2	Trim28_+_13024183.23-P1P2|Trim28_+_13024051.23-P1P2
Csrnp2	P1P2	Csrnp2_-_100495428.23-P1P2	GCACCCTGGAACATTCGCGG	1	Csrnp2_+_100495399.23-P1P2	GAATGTTCCAGGGTGGGCGA	2	Csrnp2_-_100495428.23-P1P2|Csrnp2_+_100495399.23-P1P2
Sall3	P1P2	Sall3_+_80986909.23-P1P2	GcggAGCCGCACCTGAGCGA	1	Sall3_+_80987206.23-P1P2	GCCCCAGGACCACAAGCGGT	2	Sall3_+_80986909.23-P1P2|Sall3_+_80987206.23-P1P2
Bdp1	P1P2	Bdp1_+_100104105.23-P1P2	GCGGAGTCTGACGTCATCGT	1	Bdp1_-_100104102.23-P1P2	GGAAGCAATGCGTAATCATT	2	Bdp1_+_100104105.23-P1P2|Bdp1_-_100104102.23-P1P2
Nipbl	P1P2	Nipbl_-_8444782.23-P1P2	GTCAGCGCGCCGGCTCCCGC	1	Nipbl_+_8444701.23-P1P2	GcggcggcggAAGTGGAGTA	2	Nipbl_-_8444782.23-P1P2|Nipbl_+_8444701.23-P1P2
Plce1	ENSMUST00000182481.1	Plce1_+_38481186.23-ENSMUST00000182481.1	GCAAGTGCCCGGGAGCACAG	1	Plce1_+_38481002.23-ENSMUST00000182481.1	GAACTCGCCCGCGGGGTGAG	2	Plce1_+_38481186.23-ENSMUST00000182481.1|Plce1_+_38481002.23-ENSMUST00000182481.1
Mrpl45	P1P2	Mrpl45_+_97315717.23-P1P2	GCGCACGCGCACGCTCTCCA	1	Mrpl45_+_97315711.23-P1P2	GCGCACGCTCTCCAGGGGAG	2	Mrpl45_+_97315717.23-P1P2|Mrpl45_+_97315711.23-P1P2
Lgals1	P1P2	Lgals1_+_78926602.23-P1P2	GCCACCAGAAGTGGAGTCTA	1	Lgals1_-_78926537.23-P1P2	GGGCGGCGCCAGGACCCTGA	2	Lgals1_+_78926602.23-P1P2|Lgals1_-_78926537.23-P1P2
Zcchc9	P1P2	Zcchc9_-_91807872.23-P1P2	GAATGAGCGCCCAGTCTGTG	1	Zcchc9_-_91807903.23-P1P2	GGTGCAGTCTAGATGACGGA	2	Zcchc9_-_91807872.23-P1P2|Zcchc9_-_91807903.23-P1P2
Olfr711	ENSMUST00000051715.4	Olfr711_+_106975524.23-ENSMUST00000051715.4	GAGGACAGAGTAATCTAGGT	1	Olfr711_+_106975515.23-ENSMUST00000051715.4	GTAATCTAGGTAGGTCCTTG	2	Olfr711_+_106975524.23-ENSMUST00000051715.4|Olfr711_+_106975515.23-ENSMUST00000051715.4
Zfp46	P1	Zfp46_-_136284348.23-P1	GAGGTAGAAGAGATTCATTG	1	Zfp46_+_136284540.23-P1	GACGGGAGACTTCTCTGCCT	2	Zfp46_-_136284348.23-P1|Zfp46_+_136284540.23-P1
Vtn	P1P2	Vtn_+_78499088.23-P1P2	GCCAAAGTCAGTAGGGTCAC	1	Vtn_+_78499095.23-P1P2	GGCCAAGACCAAAGTCAGTA	2	Vtn_+_78499088.23-P1P2|Vtn_+_78499095.23-P1P2
Birc2	P1P2	Birc2_+_7835494.23-P1P2	GTAAGTAGACTGGTTGGGTG	1	Birc2_+_7835499.23-P1P2	GCTTTCTAAGTAGACTGGTT	2	Birc2_+_7835494.23-P1P2|Birc2_+_7835499.23-P1P2
Tnfrsf12a	P1P2	Tnfrsf12a_+_23677613.23-P1P2	GGAGTAGGGTAGACACTTGG	1	Tnfrsf12a_+_23677637.23-P1P2	GGGGTACTCAAGTTTGCAGA	2	Tnfrsf12a_+_23677613.23-P1P2|Tnfrsf12a_+_23677637.23-P1P2
Ubp1	P1P2	Ubp1_+_113930996.23-P1P2	GGCGGCGGAAGAGGTGTGAC	1	Ubp1_-_113930935.23-P1P2	GCGGGAACGCAGAGGCTCAC	2	Ubp1_+_113930996.23-P1P2|Ubp1_-_113930935.23-P1P2
Scgb2a2	ENSMUST00000179814.1	Scgb2a2_-_9847499.23-ENSMUST00000179814.1	GGACTTGCGTTCTTGTTTAT	1	Scgb2a2_-_9847514.23-ENSMUST00000179814.1	GTTATTGGATGAGACTAAGG	2	Scgb2a2_-_9847499.23-ENSMUST00000179814.1|Scgb2a2_-_9847514.23-ENSMUST00000179814.1
Mrap2	P1P2	Mrap2_-_87144176.23-P1P2	GTGGGTGGTGGTGGTTCATG	1	Mrap2_-_87143913.23-P1P2	GTGTACCTATAGTATGGAGG	2	Mrap2_-_87144176.23-P1P2|Mrap2_-_87143913.23-P1P2
Olfr374	ENSMUST00000055735.4	Olfr374_-_72106883.23-ENSMUST00000055735.4	GCTAGAGACACTGGCACCAA	1	Olfr374_-_72106792.23-ENSMUST00000055735.4	GAAGCCTCAACGCTATCTCA	2	Olfr374_-_72106883.23-ENSMUST00000055735.4|Olfr374_-_72106792.23-ENSMUST00000055735.4
Ccdc69	P1P2	Ccdc69_+_55078243.23-P1P2	GGAACCATCTGTGGCTCCTG	1	Ccdc69_+_55078211.23-P1P2	GCCCCGGCCTCAGGTACTTC	2	Ccdc69_+_55078243.23-P1P2|Ccdc69_+_55078211.23-P1P2
Fbxo42	P1P2	Fbxo42_+_141147812.23-P1P2	GGGGCGGCGCCATATTGAGA	1	Fbxo42_-_141147825.23-P1P2	GCCCTCGGCCCTTCTCAATA	2	Fbxo42_+_141147812.23-P1P2|Fbxo42_-_141147825.23-P1P2
Fbxw9	P1P2	Fbxw9_+_85059975.23-P1P2	GCAGACGTCTAGTCCTGTGC	1	Fbxw9_+_85059966.23-P1P2	GAGTCCTGTGCGGGTGTGAA	2	Fbxw9_+_85059975.23-P1P2|Fbxw9_+_85059966.23-P1P2
Klf16	P1P2	Klf16_+_80577459.23-P1P2	GCGTGTCCGCGGTGGGGAGA	1	Klf16_+_80577496.23-P1P2	GCGACTCTCTGGAGGACCGA	2	Klf16_+_80577459.23-P1P2|Klf16_+_80577496.23-P1P2
Psg16	P1	Psg16_-_17087784.23-P1	GGGACACATAGACAGAATGG	1	Psg16_-_17087840.23-P1	GAGTCAGCAGATGTCGGCCC	2	Psg16_-_17087784.23-P1|Psg16_-_17087840.23-P1
Zfp369	P1P2	Zfp369_+_65278620.23-P1P2	GGACAGAGACCGAGACTAGG	1	Zfp369_+_65278754.23-P1P2	GTCGAGCGGCGGCAATCTGT	2	Zfp369_+_65278620.23-P1P2|Zfp369_+_65278754.23-P1P2
Olfr1477	ENSMUST00000096201.2	Olfr1477_+_13500418.23-ENSMUST00000096201.2	GGAGCATAATGAGCTCATAT	1	Olfr1477_-_13500293.23-ENSMUST00000096201.2	GTCTCTGTTCAACGTGAATG	2	Olfr1477_+_13500418.23-ENSMUST00000096201.2|Olfr1477_-_13500293.23-ENSMUST00000096201.2
Hs6st3	P1P2	Hs6st3_-_119137646.23-P1P2	GTCCCCTGGAAACTCCTCCG	1	Hs6st3_+_119137626.23-P1P2	GGCCCCGGAGGAGTTTCCAG	2	Hs6st3_-_119137646.23-P1P2|Hs6st3_+_119137626.23-P1P2
Cdh20	P1P2	Cdh20_+_104768210.23-P1P2	GAACCCAGAGAGGGATGAAA	1	Cdh20_-_104768543.23-P1P2	GCGGGCTAGAAAACGCGCGA	2	Cdh20_+_104768210.23-P1P2|Cdh20_-_104768543.23-P1P2
Gigyf1	ENSMUST00000031727.7	Gigyf1_+_137518694.23-ENSMUST00000031727.7	GCCAAAGCTGAGTCAGGGTA	1	Gigyf1_-_137518650.23-ENSMUST00000031727.7	GAGAGGGCGTCCCACTGAGC	2	Gigyf1_+_137518694.23-ENSMUST00000031727.7|Gigyf1_-_137518650.23-ENSMUST00000031727.7
Nfatc2	P1	Nfatc2_+_168590550.23-P1	GCGCCCCTCTCCTAGGAATC	1	Nfatc2_-_168590421.23-P1	GGGCGCCGCCCGGACGGGGA	2	Nfatc2_+_168590550.23-P1|Nfatc2_-_168590421.23-P1
Moxd2	P1P2	Moxd2_-_40887693.23-P1P2	GTCCAGGGAGGACACAGAGT	1	Moxd2_+_40887747.23-P1P2	GAGAACCTCCTTGACTTTAC	2	Moxd2_-_40887693.23-P1P2|Moxd2_+_40887747.23-P1P2
Scgb2b12	ENSMUST00000183195.1	Scgb2b12_+_32327406.23-ENSMUST00000183195.1	GTTGTTCTTCATAATAGGAG	1	Scgb2b12_+_32327763.23-ENSMUST00000183195.1	GACTACATGAATGAGCAATG	2	Scgb2b12_+_32327406.23-ENSMUST00000183195.1|Scgb2b12_+_32327763.23-ENSMUST00000183195.1
Golm1	P1P2	Golm1_+_59675909.23-P1P2	GTCTCCGCAAGTAACCTCAG	1	Golm1_+_59675872.23-P1P2	GTGGCGGACAGGGAAGACTG	2	Golm1_+_59675909.23-P1P2|Golm1_+_59675872.23-P1P2
Jakmip1	P2	Jakmip1_+_37047364.23-P2	GAGACCAGGCCCATCCTCTG	1	Jakmip1_-_37047377.23-P2	GGAAGCAGGCCACAGAGGAT	2	Jakmip1_+_37047364.23-P2|Jakmip1_-_37047377.23-P2
B9d2	P1P2	B9d2_-_25680663.23-P1P2	GCTGGGGCGTAAGGCGTCGC	1	B9d2_+_25680636.23-P1P2	GACGCCTTACGCCCCAGAGT	2	B9d2_-_25680663.23-P1P2|B9d2_+_25680636.23-P1P2
Dsg2	P1P2	Dsg2_-_20558040.23-P1P2	GCACCCAAGGTCCCCTGCGG	1	Dsg2_+_20558021.23-P1P2	GGTCCCCCGCAGGGGACCTT	2	Dsg2_-_20558040.23-P1P2|Dsg2_+_20558021.23-P1P2
Olfr661	ENSMUST00000098168.2	Olfr661_+_104687801.23-ENSMUST00000098168.2	GCACTCACAGTATTCCTTGG	1	Olfr661_-_104687617.23-ENSMUST00000098168.2	GTGTACCTAGAAATCTCCAC	2	Olfr661_+_104687801.23-ENSMUST00000098168.2|Olfr661_-_104687617.23-ENSMUST00000098168.2
Iltifb	ENSMUST00000163808.1	Iltifb_-_118295113.23-ENSMUST00000163808.1	GGTAAGTGAGCACACAGTTA	1	Iltifb_-_118295376.23-ENSMUST00000163808.1	GTATTCGGATTGATTGCATG	2	Iltifb_-_118295113.23-ENSMUST00000163808.1|Iltifb_-_118295376.23-ENSMUST00000163808.1
Trhr2	ENSMUST00000044123.1	Trhr2_-_122361014.23-ENSMUST00000044123.1	GGGGCAGTCTATAGGGCATG	1	Trhr2_-_122361043.23-ENSMUST00000044123.1	GGGACAGGGCTCAGATAGGA	2	Trhr2_-_122361014.23-ENSMUST00000044123.1|Trhr2_-_122361043.23-ENSMUST00000044123.1
Rab10	P1P2	Rab10_-_3310093.23-P1P2	GGCCGCGGGCGCGCTCCCTA	1	Rab10_+_3309978.23-P1P2	GGGGCGAGGGCGCGAGAGAA	2	Rab10_-_3310093.23-P1P2|Rab10_+_3309978.23-P1P2
Zdhhc8	P1P2	Zdhhc8_+_18235173.23-P1P2	GccgccgggTCCACCTTAAG	1	Zdhhc8_+_18235386.23-P1P2	GCAAGAGAGCTCCCGGGTTA	2	Zdhhc8_+_18235173.23-P1P2|Zdhhc8_+_18235386.23-P1P2
Tbc1d20	P1P2	Tbc1d20_-_152293716.23-P1P2	GCAGCAGCAAAACTACGACC	1	Tbc1d20_+_152293767.23-P1P2	GCGCGCATGCAGTTTGACAG	2	Tbc1d20_-_152293716.23-P1P2|Tbc1d20_+_152293767.23-P1P2
Mastl	P1P2	Mastl_-_23156027.23-P1P2	GCACTGCTGGGCGCAGTCTG	1	Mastl_-_23155996.23-P1P2	GTAAGCAGGCATCGACGGGT	2	Mastl_-_23156027.23-P1P2|Mastl_-_23155996.23-P1P2
Rdm1	P1P2	Rdm1_-_101626765.23-P1P2	GGAGGGGAACAGAGTCACGA	1	Rdm1_-_101626684.23-P1P2	GCTGGTGGGGAGTTATTTGG	2	Rdm1_-_101626765.23-P1P2|Rdm1_-_101626684.23-P1P2
Nsmce2	P1P2	Nsmce2_+_59374106.23-P1P2	GTGCGGCCCGGGACTCTAGG	1	Nsmce2_+_59373946.23-P1P2	GGAGCCAACGGGAAAACCTA	2	Nsmce2_+_59374106.23-P1P2|Nsmce2_+_59373946.23-P1P2
Aipl1	P1P2	Aipl1_+_72037662.23-P1P2	GCTGAGGAATGTGGACGGTG	1	Aipl1_+_72037678.23-P1P2	GCATCTGCTGAGAGATCCTG	2	Aipl1_+_72037662.23-P1P2|Aipl1_+_72037678.23-P1P2
Gm9125	ENSMUST00000180746.1	Gm9125_+_94055389.23-ENSMUST00000180746.1	Gaacacgaaggaaagaagaa	1	Gm9125_-_94055386.23-ENSMUST00000180746.1	Gcagagccccaaaactatta	2	Gm9125_+_94055389.23-ENSMUST00000180746.1|Gm9125_-_94055386.23-ENSMUST00000180746.1
Ywhaq	P1P2	Ywhaq_-_21417693.23-P1P2	GGAGGGGCGAGCGCGCGGAA	1	Ywhaq_-_21417727.23-P1P2	GGGGGCGGGAAGCGAAGCGG	2	Ywhaq_-_21417693.23-P1P2|Ywhaq_-_21417727.23-P1P2
Ctsw	P1P2	Ctsw_-_5468565.23-P1P2	GGGGCTGGAGAAACCACGAG	1	Ctsw_-_5468675.23-P1P2	GCAGGCTCCAAACTATTCTG	2	Ctsw_-_5468565.23-P1P2|Ctsw_-_5468675.23-P1P2
Hap1	P1P2	Hap1_-_100356239.23-P1P2	GCAGCCAGTGGTGACGAGAT	1	Hap1_+_100356608.23-P1P2	GGGCGAGCGCGAGAGTGAGA	2	Hap1_-_100356239.23-P1P2|Hap1_+_100356608.23-P1P2
Ctcfl	P1P2	Ctcfl_-_173119589.23-P1P2	GGACAGAGTTGTGGAGTCTT	1	Ctcfl_-_173119506.23-P1P2	GGGGGCGCTGGAGTCCTCGG	2	Ctcfl_-_173119589.23-P1P2|Ctcfl_-_173119506.23-P1P2
Zfp449	P1P2	Zfp449_-_56346322.23-P1P2	GCCCACGTCAGCATCCTAGT	1	Zfp449_+_56346199.23-P1P2	GTGGTCCTAGGGGATTGGGT	2	Zfp449_-_56346322.23-P1P2|Zfp449_+_56346199.23-P1P2
Prop1	P2	Prop1_+_50952592.23-P2	GGGGCAGACGGGGCGTGTGG	1	Prop1_+_50952589.23-P2	GCAGACGGGGCGTGTGGAGG	2	Prop1_+_50952592.23-P2|Prop1_+_50952589.23-P2
Zscan4c	ENSMUST00000131379.2	Zscan4c_+_11005193.23-ENSMUST00000131379.2	GAAAACTTGTTAAAATTTCC	1	Zscan4c_+_11005177.23-ENSMUST00000131379.2	GTCCTGGTTTCTAGAGAGAT	2	Zscan4c_+_11005193.23-ENSMUST00000131379.2|Zscan4c_+_11005177.23-ENSMUST00000131379.2
Prss22	P1P2	Prss22_-_23998227.23-P1P2	GAGGAGGTGGGGTTGCCAGA	1	Prss22_+_23998282.23-P1P2	GCCCGGGCATACAACTGATC	2	Prss22_-_23998227.23-P1P2|Prss22_+_23998282.23-P1P2
Kcns2	P1P2	Kcns2_-_34837592.23-P1P2	GCGCGCAGATCGGAAGAGGG	1	Kcns2_+_34837618.23-P1P2	GTCCGCGAGAGGCTCACAGG	2	Kcns2_-_34837592.23-P1P2|Kcns2_+_34837618.23-P1P2
Cebpz	P1P2	Cebpz_-_78937341.23-P1P2	GTGGAGGGGCTTGTAGTCAT	1	Cebpz_-_78937219.23-P1P2	GCGGGTGAGAGTCCCCTTGC	2	Cebpz_-_78937341.23-P1P2|Cebpz_-_78937219.23-P1P2
Ece2	P1	Ece2_+_20611558.23-P1	GCACCGAGGTAAGAAATGGA	1	Ece2_-_20611604.23-P1	GGGGCTCCTTAGTCCCGCCC	2	Ece2_+_20611558.23-P1|Ece2_-_20611604.23-P1
Ccl17	P1P2	Ccl17_+_94810269.23-P1P2	GTCGACTCGGGACAGGGGAG	1	Ccl17_-_94810163.23-P1P2	GTTCACCAGTACTAGGACAA	2	Ccl17_+_94810269.23-P1P2|Ccl17_-_94810163.23-P1P2
9030025P20Rik	ENSMUST00000061688.9	9030025P20Rik_+_14978705.23-ENSMUST00000061688.9	GGGGCCGTTGGGCAGTTACA	1	9030025P20Rik_+_14978648.23-ENSMUST00000061688.9	GTGAGCCGATCAAGATGGAG	2	9030025P20Rik_+_14978705.23-ENSMUST00000061688.9|9030025P20Rik_+_14978648.23-ENSMUST00000061688.9
P4ha2	P2	P4ha2_+_54113001.23-P2	GCCAACCCAGGCGGGTCACG	1	P4ha2_-_54112984.23-P2	GTTCAGACTAGCTGTCTCTC	2	P4ha2_+_54113001.23-P2|P4ha2_-_54112984.23-P2
Sorcs1	P1P2	Sorcs1_+_50678869.23-P1P2	GACTCGGCGCGCCTTGGGGA	1	Sorcs1_-_50678840.23-P1P2	GCCGAGCTGCGCTGTGTCCA	2	Sorcs1_+_50678869.23-P1P2|Sorcs1_-_50678840.23-P1P2
Cd2ap	P1P2	Cd2ap_+_42876796.23-P1P2	GCGCAGCCCGCCACACCTGG	1	Cd2ap_-_42876837.23-P1P2	GCGGGCACTTGGTCTCCCTG	2	Cd2ap_+_42876796.23-P1P2|Cd2ap_-_42876837.23-P1P2
Sgip1	P2	Sgip1_+_102759094.23-P2	GACAAGGTCTGGTGGAGCTG	1	Sgip1_+_102759034.23-P2	GTTCAAAGGGAGGGACTCCC	2	Sgip1_+_102759094.23-P2|Sgip1_+_102759034.23-P2
Xrcc3	P2	Xrcc3_+_111810217.23-P2	GCCCACCTGGGAAATGTGAC	1	Xrcc3_-_111810057.23-P2	GCTCCGCCCACAGCCTGCTA	2	Xrcc3_+_111810217.23-P2|Xrcc3_-_111810057.23-P2
Sdpr	P1P2	Sdpr_-_51289139.23-P1P2	GAAAAGAACTCGGGCTTGTG	1	Sdpr_+_51288819.23-P1P2	GGGGAGGCGCCGAGTTGAAA	2	Sdpr_-_51289139.23-P1P2|Sdpr_+_51288819.23-P1P2
Clec4b1	P1P2	Clec4b1_-_123050013.23-P1P2	GGAGGAGGTTGACTGAGTTC	1	Clec4b1_-_123049699.23-P1P2	Gaatgggatggggtttcagt	2	Clec4b1_-_123050013.23-P1P2|Clec4b1_-_123049699.23-P1P2
Slc7a12	P1P2	Slc7a12_-_14480537.23-P1P2	Gccaggagaagggtagcaac	1	Slc7a12_-_14480510.23-P1P2	Ggaatgagatgagctatgag	2	Slc7a12_-_14480537.23-P1P2|Slc7a12_-_14480510.23-P1P2
1700018B08Rik	P1P2	1700018B08Rik_+_121541998.23-P1P2	GCTCCCGATTGGCTGATCGA	1	1700018B08Rik_-_121542089.23-P1P2	GAGGTGGCTCATGGGAGCAG	2	1700018B08Rik_+_121541998.23-P1P2|1700018B08Rik_-_121542089.23-P1P2
Zbtb37	P1P2	Zbtb37_-_161035008.23-P1P2	GCCGCCCTCCGGGCTCTCGG	1	Zbtb37_+_161034990.23-P1P2	GACGCCCCCGAGAGCCCGGA	2	Zbtb37_-_161035008.23-P1P2|Zbtb37_+_161034990.23-P1P2
Nrarp	P1P2	Nrarp_+_25180573.23-P1P2	GGGTCTGACCAGCACTAGTC	1	Nrarp_+_25180599.23-P1P2	GCAGCTCCCTCCAGGATAGA	2	Nrarp_+_25180573.23-P1P2|Nrarp_+_25180599.23-P1P2
Abcc3	P1P2	Abcc3_-_94393138.23-P1P2	GAGGGACAGTAGAGTAAGGA	1	Abcc3_-_94393104.23-P1P2	GTAAAAGTGCTGGTACCTAA	2	Abcc3_-_94393138.23-P1P2|Abcc3_-_94393104.23-P1P2
S1pr2	P1P2	S1pr2_-_20976851.23-P1P2	GGTGGCCCGCCAGTTAGCCA	1	S1pr2_-_20976873.23-P1P2	GCGCGCACGGGGGAAGAGCA	2	S1pr2_-_20976851.23-P1P2|S1pr2_-_20976873.23-P1P2
Mgl2	P1P2	Mgl2_-_70130142.23-P1P2	GGGTCTAGAAAGAGGAATAT	1	Mgl2_-_70130288.23-P1P2	GTGGACCACTCAAGATGCAA	2	Mgl2_-_70130142.23-P1P2|Mgl2_-_70130288.23-P1P2
Mtap7d3	P1P2	Mtap7d3_+_56822591.23-P1P2	GAAAGGAAAAGAACGGTCAA	1	Mtap7d3_+_56822446.23-P1P2	GCTAATGCTACCTATATTGA	2	Mtap7d3_+_56822591.23-P1P2|Mtap7d3_+_56822446.23-P1P2
Oas1c	P1P2	Oas1c_-_120812703.23-P1P2	GGTAAAAGCTGGACCTAGGA	1	Oas1c_-_120812880.23-P1P2	GAGGGCCTCTAAAGGGGTCA	2	Oas1c_-_120812703.23-P1P2|Oas1c_-_120812880.23-P1P2
Znhit2	P1P2	Znhit2_-_6061041.23-P1P2	GGCGAGCAAACCTGTTCCTT	1	Znhit2_-_6061161.23-P1P2	GCAACCACCCCCACACATAA	2	Znhit2_-_6061041.23-P1P2|Znhit2_-_6061161.23-P1P2
Ier3	P1P2	Ier3_+_35821585.23-P1P2	GGGGGAGCAGTTGGCTGCAA	1	Ier3_+_35821499.23-P1P2	GCCAGTGCACGTTCTTTCCT	2	Ier3_+_35821585.23-P1P2|Ier3_+_35821499.23-P1P2
Pigt	P1P2	Pigt_+_164497367.23-P1P2	GAAGGGGTGTGGGCGTGTGG	1	Pigt_+_164497446.23-P1P2	GCGTCCCGGAAACCACTCCG	2	Pigt_+_164497367.23-P1P2|Pigt_+_164497446.23-P1P2
Dnmt1	P1P2	Dnmt1_-_20952985.23-P1P2	GCACACCTCCTGGCTATAGT	1	Dnmt1_-_20952956.23-P1P2	GGGAGTGCGCATGCGCGCAA	2	Dnmt1_-_20952985.23-P1P2|Dnmt1_-_20952956.23-P1P2
Krt10	P1P2	Krt10_-_99389413.23-P1P2	GCTGAGAGGGCGTGTCTCAC	1	Krt10_+_99389382.23-P1P2	GACGCCCTCTCAGTATATAA	2	Krt10_-_99389413.23-P1P2|Krt10_+_99389382.23-P1P2
Krtap19-9a	P1P2	Krtap19-9a_-_88924791.23-P1P2	Gtgtgtggcttaacagttaa	1	Krtap19-9a_+_88924324.23-P1P2	GAAGAGGGGGCACTTTGTTG	2	Krtap19-9a_-_88924791.23-P1P2|Krtap19-9a_+_88924324.23-P1P2
Tmem164	P1P2	Tmem164_-_142681265.23-P1P2	Gagggagtgaagtggatcgg	1	Tmem164_-_142681349.23-P1P2	Gtggagggagttggcgacga	2	Tmem164_-_142681265.23-P1P2|Tmem164_-_142681349.23-P1P2
Slc26a8	P1P2	Slc26a8_-_28689990.23-P1P2	GTGTAGGCATGGGTGGATGT	1	Slc26a8_+_28690157.23-P1P2	GAGAGTATGGAGAACTACTA	2	Slc26a8_-_28689990.23-P1P2|Slc26a8_+_28690157.23-P1P2
Mpv17l	ENSMUST00000023360.7	Mpv17l_+_13940690.23-ENSMUST00000023360.7	GCCTGCCCCGGGTGCCCTCA	1	Mpv17l_+_13940586.23-ENSMUST00000023360.7	GTGACAGCTGGCCACCGAGA	2	Mpv17l_+_13940690.23-ENSMUST00000023360.7|Mpv17l_+_13940586.23-ENSMUST00000023360.7
Rab28	P1P2	Rab28_-_41708291.23-P1P2	GGCGTCCCGGTTTGCTCGTG	1	Rab28_-_41708247.23-P1P2	GCCAACCATCACACTGCAAT	2	Rab28_-_41708291.23-P1P2|Rab28_-_41708247.23-P1P2
Lonrf2	P1P2	Lonrf2_-_38836765.23-P1P2	GCATGCTCTTCCCGCCGCTG	1	Lonrf2_+_38836714.23-P1P2	GCACGCGCGGGGCCGCCTGC	2	Lonrf2_-_38836765.23-P1P2|Lonrf2_+_38836714.23-P1P2
Ttc36	P1P2	Ttc36_+_44802977.23-P1P2	GCCTGCCAGGTCAGTAACCC	1	Ttc36_-_44803240.23-P1P2	GTGAAGGTCACTCCAGACAA	2	Ttc36_+_44802977.23-P1P2|Ttc36_-_44803240.23-P1P2
Olfr1200	ENSMUST00000099811.1	Olfr1200_-_88768410.23-ENSMUST00000099811.1	GTGCCTAGGAAGGGACATTG	1	Olfr1200_-_88768400.23-ENSMUST00000099811.1	GGAAGAGAATGTGCCTAGGA	2	Olfr1200_-_88768410.23-ENSMUST00000099811.1|Olfr1200_-_88768400.23-ENSMUST00000099811.1
Snx13	P1P2	Snx13_+_35047058.23-P1P2	GcgACCCGGGACCTCCTCTG	1	Snx13_-_35047076.23-P1P2	GAGCCCGCAGAGGAGGTCCC	2	Snx13_+_35047058.23-P1P2|Snx13_-_35047076.23-P1P2
Olfr432	ENSMUST00000062665.3	Olfr432_+_174050200.23-ENSMUST00000062665.3	GGACTACTAGTAGTCAGAAG	1	Olfr432_-_174050335.23-ENSMUST00000062665.3	GGTCCAGAGGAAAAACATAA	2	Olfr432_+_174050200.23-ENSMUST00000062665.3|Olfr432_-_174050335.23-ENSMUST00000062665.3
Krtap22-2	P1P2	Krtap22-2_+_89010867.23-P1P2	GTGGCTGGCATGTTTGTTGA	1	Krtap22-2_-_89010918.23-P1P2	GAGATGAAATTGTCAGTGTC	2	Krtap22-2_+_89010867.23-P1P2|Krtap22-2_-_89010918.23-P1P2
Tmed7	P1P2	Tmed7_-_46597649.23-P1P2	GGAAGCGCGTGAGGCCTCCG	1	Tmed7_-_46597582.23-P1P2	GGACCCGGATGTGGTATCTG	2	Tmed7_-_46597649.23-P1P2|Tmed7_-_46597582.23-P1P2
Tmem106a	P1P2	Tmem106a_+_101582166.23-P1P2	GCCGGCTCTGCGAGTCTCAC	1	Tmem106a_-_101582053.23-P1P2	GTGGAGGGACCTGTCCATCT	2	Tmem106a_+_101582166.23-P1P2|Tmem106a_-_101582053.23-P1P2
Fyn	P1P2	Fyn_+_39369747.23-P1P2	GATCCCGAGGGGTTCGAGAG	1	Fyn_+_39369560.23-P1P2	GCGGCCACAGGGTGTGTGAG	2	Fyn_+_39369747.23-P1P2|Fyn_+_39369560.23-P1P2
Olig1	P1P2	Olig1_+_91269604.23-P1P2	GTGCCAGAGAGGGTTATCGT	1	Olig1_-_91269632.23-P1P2	GTAACCCTCTCTGGCAACTC	2	Olig1_+_91269604.23-P1P2|Olig1_-_91269632.23-P1P2
Lonp1	P1P2	Lonp1_-_56627068.23-P1P2	GTGGTTCAAGGCTCAGAGCG	1	Lonp1_-_56627231.23-P1P2	GGGGGGCGCTCCACCAGGCA	2	Lonp1_-_56627068.23-P1P2|Lonp1_-_56627231.23-P1P2
Aurka	P1P2	Aurka_-_172370714.23-P1P2	GCCCGGAAGTGGTGCACCAA	1	Aurka_+_172370716.23-P1P2	GAGAACGGCCGCAGATCGGA	2	Aurka_-_172370714.23-P1P2|Aurka_+_172370716.23-P1P2
Rassf10	P1P2	Rassf10_-_112953834.23-P1P2	GAGGGGCAGACCCGTCCGCA	1	Rassf10_-_112953853.23-P1P2	GGGGCTGGGAGGGGCGAGTT	2	Rassf10_-_112953834.23-P1P2|Rassf10_-_112953853.23-P1P2
Gm14378	P1P2	Gm14378_+_4248094.23-P1P2	GCAAGGCCAGCCATGGATAA	1	Gm14378_+_4248137.23-P1P2	GAGCGGGGGCGGAGGATGGA	2	Gm14378_+_4248094.23-P1P2|Gm14378_+_4248137.23-P1P2
Tspyl1	P1P2	Tspyl1_+_34282132.23-P1P2	GAACCTGCAGCGCACCTGAT	1	Tspyl1_+_34282012.23-P1P2	GGAGACTGAAGACAGTGGCG	2	Tspyl1_+_34282132.23-P1P2|Tspyl1_+_34282012.23-P1P2
Zmiz2	P1P2	Zmiz2_-_6389169.23-P1P2	GGGGACGCAGGGTGCAGGCC	1	Zmiz2_+_6389273.23-P1P2	GGCCCCGAGCGGTGCTCCAG	2	Zmiz2_-_6389169.23-P1P2|Zmiz2_+_6389273.23-P1P2
Sec11c	P1P2	Sec11c_-_65800374.23-P1P2	GCCCGCTCGCCACGCTTCCC	1	Sec11c_+_65800473.23-P1P2	GGGGAATTGTAGTCTCGTGA	2	Sec11c_-_65800374.23-P1P2|Sec11c_+_65800473.23-P1P2
Ramp3	P1P2	Ramp3_+_6658361.23-P1P2	GGTCGCGTTGGGATATAGAC	1	Ramp3_-_6658456.23-P1P2	GAGGCAACGGAGGGAGTCAG	2	Ramp3_+_6658361.23-P1P2|Ramp3_-_6658456.23-P1P2
Olfr248	ENSMUST00000075329.2	Olfr248_-_174390918.23-ENSMUST00000075329.2	GATCGTATCGTCTACATACA	1	Olfr248_-_174390840.23-ENSMUST00000075329.2	GCCAGAATAAGTGAACTTTC	2	Olfr248_-_174390918.23-ENSMUST00000075329.2|Olfr248_-_174390840.23-ENSMUST00000075329.2
Zfp457	P1P2	Zfp457_-_67306580.23-P1P2	GACTGAGAGCAGCTGCACAT	1	Zfp457_+_67306637.23-P1P2	GTGTGAAAGGCTCATCTTAC	2	Zfp457_-_67306580.23-P1P2|Zfp457_+_67306637.23-P1P2
Cd244	P1P2	Cd244_+_171559126.23-P1P2	GAGCCTCAGTCCCTCCACGT	1	Cd244_-_171559123.23-P1P2	GTGGAGGCATCTTAGCTTGT	2	Cd244_+_171559126.23-P1P2|Cd244_-_171559123.23-P1P2
Pgk2	P1P2	Pgk2_-_40208802.23-P1P2	GGAGAGCTTGGGGTTAGAGT	1	Pgk2_-_40208791.23-P1P2	GACAGTAAAACGGAGAGCTT	2	Pgk2_-_40208802.23-P1P2|Pgk2_-_40208791.23-P1P2
Zfp113	P1P2	Zfp113_-_138155915.23-P1P2	GTTGCTGGCCAGGTTGGGAA	1	Zfp113_-_138155835.23-P1P2	GGGAGGTCTTCATCTCTCGA	2	Zfp113_-_138155915.23-P1P2|Zfp113_-_138155835.23-P1P2
Adamts1	P1P2	Adamts1_+_85803416.23-P1P2	GGCCCAGCCGGGGCACAGGA	1	Adamts1_-_85803241.23-P1P2	GGCGCCTCGGGGCCTGAAGG	2	Adamts1_+_85803416.23-P1P2|Adamts1_-_85803241.23-P1P2
Fpr2	P1P2	Fpr2_-_17887635.23-P1P2	Ggggatccagtgttatcttt	1	Fpr2_+_17887732.23-P1P2	GTCCCAGAAGCCAGGCAAAT	2	Fpr2_-_17887635.23-P1P2|Fpr2_+_17887732.23-P1P2
Gpbp1l1	P1P2	Gpbp1l1_-_116557576.23-P1P2	GcgggcggggTCACGAAAGC	1	Gpbp1l1_+_116557534.23-P1P2	GgggcgcccgcggcTCGCTC	2	Gpbp1l1_-_116557576.23-P1P2|Gpbp1l1_+_116557534.23-P1P2
Hydin	P1P2	Hydin_-_110266826.23-P1P2	GTCTGGCTAAGGAAGGCGTT	1	Hydin_-_110266809.23-P1P2	GTGAAGACCCAGGAAAGGTC	2	Hydin_-_110266826.23-P1P2|Hydin_-_110266809.23-P1P2
4833420G17Rik	P1P2	4833420G17Rik_+_119462630.23-P1P2	GGAAGCGCCGAGTTTCCGTG	1	4833420G17Rik_+_119462587.23-P1P2	GTACCAGGCGACACTGTCAC	2	4833420G17Rik_+_119462630.23-P1P2|4833420G17Rik_+_119462587.23-P1P2
Cnih3	P1P2	Cnih3_+_181352485.23-P1P2	GGTGCTCGCCCGCCTCTCGT	1	Cnih3_+_181352320.23-P1P2	GCAGGGAAGTGAGGGATCGA	2	Cnih3_+_181352485.23-P1P2|Cnih3_+_181352320.23-P1P2
Gdpd3	P1P2	Gdpd3_-_126766224.23-P1P2	GGGGTGCTGGGATCTGTGAA	1	Gdpd3_+_126766273.23-P1P2	GGCAGTATGGCCCAGAGCTG	2	Gdpd3_-_126766224.23-P1P2|Gdpd3_+_126766273.23-P1P2
Banp	P1P2	Banp_-_121950399.23-P1P2	GTCAACTCTCGGAGCAGGGG	1	Banp_+_121950470.23-P1P2	GGGGCGGGGCCGGTCGGGAA	2	Banp_-_121950399.23-P1P2|Banp_+_121950470.23-P1P2
Csf3	P1P2	Csf3_-_98701146.23-P1P2	GGGGGACAAGACGTCAAGGA	1	Csf3_+_98700993.23-P1P2	GGCAAGGAACTCAGACCCTG	2	Csf3_-_98701146.23-P1P2|Csf3_+_98700993.23-P1P2
Gkap1	P1P2	Gkap1_-_58274395.23-P1P2	GGGGCCGCGCAGGGTCCAAA	1	Gkap1_+_58274275.23-P1P2	GTCCGCCGCGCTGCGACCCT	2	Gkap1_-_58274395.23-P1P2|Gkap1_+_58274275.23-P1P2
Mmp7	P1P2	Mmp7_-_7691921.23-P1P2	GGTGGATTCAGCATGGTGGG	1	Mmp7_+_7691575.23-P1P2	Gtggctacatagccagatca	2	Mmp7_-_7691921.23-P1P2|Mmp7_+_7691575.23-P1P2
Casq1	P1P2	Casq1_+_172220060.23-P1P2	GGGGAGGGAGCCTAGGGAAG	1	Casq1_-_172220016.23-P1P2	GAGGGATGGATAACCTTCTG	2	Casq1_+_172220060.23-P1P2|Casq1_-_172220016.23-P1P2
Wnt3a	P1P2	Wnt3a_-_59290953.23-P1P2	GggggcgggcggggcCCTGG	1	Wnt3a_+_59290945.23-P1P2	GGCGAGGCTCCAAACCCCCA	2	Wnt3a_-_59290953.23-P1P2|Wnt3a_+_59290945.23-P1P2
Cd80	P1P2	Cd80_-_38458827.23-P1P2	GCTCACCCGGTGCTCAGAAC	1	Cd80_+_38458760.23-P1P2	GAAAAGGATTCTGCTTGCGG	2	Cd80_-_38458827.23-P1P2|Cd80_+_38458760.23-P1P2
4933422H20Rik	P1P2	4933422H20Rik_-_115440392.23-P1P2	GGGTGAGAACCCATACATGG	1	4933422H20Rik_+_115440348.23-P1P2	GCCAGCATCTATGTCTCTCG	2	4933422H20Rik_-_115440392.23-P1P2|4933422H20Rik_+_115440348.23-P1P2
Olfr597	ENSMUST00000168315.2	Olfr597_-_103319961.23-ENSMUST00000168315.2	GGGATCCTGGATCAAATAAA	1	Olfr597_-_103320290.23-ENSMUST00000168315.2	GATCTTTGCTAAAAAAAGCA	2	Olfr597_-_103319961.23-ENSMUST00000168315.2|Olfr597_-_103320290.23-ENSMUST00000168315.2
Ifi35	P1P2	Ifi35_+_101448320.23-P1P2	GGTGCTCCTGGGACCGCAAA	1	Ifi35_-_101448263.23-P1P2	GTACTGAGAGCCTGTCTGTC	2	Ifi35_+_101448320.23-P1P2|Ifi35_-_101448263.23-P1P2
Alyref2	P1P2	Alyref2_-_171503473.23-P1P2	GAGGCGCTGGGCGGCCACCA	1	Alyref2_-_171503414.23-P1P2	GAGAAGCCGCGTGGCCCGCT	2	Alyref2_-_171503473.23-P1P2|Alyref2_-_171503414.23-P1P2
Cnksr1	P1P2	Cnksr1_+_134238461.23-P1P2	GAAGACAGGCGGTGGACCAA	1	Cnksr1_-_134238513.23-P1P2	GCTGCCCCTCTGGCATCCTA	2	Cnksr1_+_134238461.23-P1P2|Cnksr1_-_134238513.23-P1P2
Hnmt	P1P2	Hnmt_+_24048909.23-P1P2	GGGGTTAAGGAAACTGGTGG	1	Hnmt_+_24048915.23-P1P2	GACGGCGGGGTTAAGGAAAC	2	Hnmt_+_24048909.23-P1P2|Hnmt_+_24048915.23-P1P2
Stxbp6	P1P2	Stxbp6_-_45074590.23-P1P2	GGGCTCCGGGGCCCCGCCAC	1	Stxbp6_-_45074543.23-P1P2	GTGGGCGAGCCACAACGACC	2	Stxbp6_-_45074590.23-P1P2|Stxbp6_-_45074543.23-P1P2
Olfr412	ENSMUST00000077794.1	Olfr412_+_74364480.23-ENSMUST00000077794.1	Gaatgcttgagcctaggagg	1	Olfr412_+_74364505.23-ENSMUST00000077794.1	Gtacactactcaacaggctg	2	Olfr412_+_74364480.23-ENSMUST00000077794.1|Olfr412_+_74364505.23-ENSMUST00000077794.1
Sec22b	P1P2	Sec22b_-_97901124.23-P1P2	GGTGGGCGGGACTTGGTCGG	1	Sec22b_+_97901036.23-P1P2	GGTGGCGCTCAAGCTTAGTA	2	Sec22b_-_97901124.23-P1P2|Sec22b_+_97901036.23-P1P2
Il1rn	P2	Il1rn_-_24345190.23-P2	GTTCCCAGGAACACCATGAA	1	Il1rn_+_24345256.23-P2	GAACCCTGAAAGTGTCGCAA	2	Il1rn_-_24345190.23-P2|Il1rn_+_24345256.23-P2
Abhd4	P2	Abhd4_+_54254083.23-P2	GCAAACGCAGGGCGGAAATA	1	Abhd4_+_54254040.23-P2	GGGGGAGATAGGCCCTGCGC	2	Abhd4_+_54254083.23-P2|Abhd4_+_54254040.23-P2
Dctn2	P1P2	Dctn2_+_127266251.23-P1P2	GGCGACAGGGAATGAGGTAA	1	Dctn2_+_127266200.23-P1P2	GATGTAGTCCCGGTCTTCTG	2	Dctn2_+_127266251.23-P1P2|Dctn2_+_127266200.23-P1P2
Srcin1	P1P2	Srcin1_-_97575335.23-P1P2	GTGTGGCCGGATGGTACAAA	1	Srcin1_-_97575304.23-P1P2	GGGCGGGAGCGCGCACGATG	2	Srcin1_-_97575335.23-P1P2|Srcin1_-_97575304.23-P1P2
Kcmf1	P1P2	Kcmf1_+_72900088.23-P1P2	Gcggccgcggggcctcaggg	1	Kcmf1_+_72899903.23-P1P2	GCCCGAGAGTGACCGAGTCA	2	Kcmf1_+_72900088.23-P1P2|Kcmf1_+_72899903.23-P1P2
Flot1	P1P2	Flot1_-_35823325.23-P1P2	GGGGAAAGGGGCGGACCGAG	1	Flot1_+_35823191.23-P1P2	GCCCCCCCCGCTCGAAGCAT	2	Flot1_-_35823325.23-P1P2|Flot1_+_35823191.23-P1P2
Capn3	P1P2	Capn3_+_120463461.23-P1P2	GGGTGCGTGGCTAGACTGAG	1	Capn3_-_120463491.23-P1P2	GCTAGCCACGCACCAGTCTG	2	Capn3_+_120463461.23-P1P2|Capn3_-_120463491.23-P1P2
Sez6l2	P1	Sez6l2_-_126950238.23-P1	GAAGGCCCGCGGGGAGGTCC	1	Sez6l2_+_126950393.23-P1	GCACTTCCCGAGGCCCCTAG	2	Sez6l2_-_126950238.23-P1|Sez6l2_+_126950393.23-P1
Synpo2l	P1	Synpo2l_+_20664681.23-P1	GCAGACCTCACAGTTGAGAG	1	Synpo2l_+_20664725.23-P1	GTGGGCAAGAGTCTATGCAA	2	Synpo2l_+_20664681.23-P1|Synpo2l_+_20664725.23-P1
Foxj1	P1P2	Foxj1_+_116335568.23-P1P2	GGCACAGAGTCGGATCTCGG	1	Foxj1_-_116335518.23-P1P2	GTCCTCTGGCGGCAACTCTC	2	Foxj1_+_116335568.23-P1P2|Foxj1_-_116335518.23-P1P2
Olfr357	ENSMUST00000069578.2	Olfr357_-_36996620.23-ENSMUST00000069578.2	GTACCAAAGTCCCCAAATCA	1	Olfr357_+_36996501.23-ENSMUST00000069578.2	GTAAAGTTTAAGCTTCTAAA	2	Olfr357_-_36996620.23-ENSMUST00000069578.2|Olfr357_+_36996501.23-ENSMUST00000069578.2
Gpr114	P1P2	Gpr114_-_94923528.23-P1P2	GccccccAGAGTGTGACCAA	1	Gpr114_-_94923642.23-P1P2	GCCCGGGAGTAAGTAGGCCG	2	Gpr114_-_94923528.23-P1P2|Gpr114_-_94923642.23-P1P2
Ncln	P1P2	Ncln_-_81496515.23-P1P2	GCCGCGCGCTGTGGAACCCT	1	Ncln_+_81496509.23-P1P2	GAGTGTGCCTACAACTCCCA	2	Ncln_-_81496515.23-P1P2|Ncln_+_81496509.23-P1P2
1700066B19Rik	P1P2	1700066B19Rik_-_35726782.23-P1P2	GAATGGGCAAGTCCTAGGGA	1	1700066B19Rik_-_35726806.23-P1P2	GTAGGTGTCTAGTATCTGCA	2	1700066B19Rik_-_35726782.23-P1P2|1700066B19Rik_-_35726806.23-P1P2
Tlr13	P1P2	Tlr13_-_106143071.23-P1P2	GAACTCAGGGGATCTATGGT	1	Tlr13_-_106143059.23-P1P2	GTACACGGCAAGTAACTCAG	2	Tlr13_-_106143071.23-P1P2|Tlr13_-_106143059.23-P1P2
Bfsp2	P1P2	Bfsp2_-_103480406.23-P1P2	GCGCCCCACCAGCCTGTGAG	1	Bfsp2_+_103480285.23-P1P2	GGAGGCCCATGACCAGGCTG	2	Bfsp2_-_103480406.23-P1P2|Bfsp2_+_103480285.23-P1P2
Rpl24	P2	Rpl24_+_55966234.23-P2	GTACAGCATTGGCGGGGAGT	1	Rpl24_-_55966332.23-P2	GGGGCGCCGGGGTCAAGGAA	2	Rpl24_+_55966234.23-P2|Rpl24_-_55966332.23-P2
Ltk	P1P2	Ltk_+_119758658.23-P1P2	GTCACCTTGGTGCCACCCAG	1	Ltk_+_119758732.23-P1P2	GTAAGCGGGGCGAGTGGGAC	2	Ltk_+_119758658.23-P1P2|Ltk_+_119758732.23-P1P2
Aspm	P1P2	Aspm_+_139454649.23-P1P2	GCGCCTGGCCAATGAGGAAG	1	Aspm_+_139454616.23-P1P2	GAACGATGGTGGGGTTGTCA	2	Aspm_+_139454649.23-P1P2|Aspm_+_139454616.23-P1P2
1700123K08Rik	P1P2	1700123K08Rik_-_138565250.23-P1P2	GcacacaGGTCCAGGCCCAG	1	1700123K08Rik_-_138565163.23-P1P2	GCTGAGGAGAAGGCCAACAT	2	1700123K08Rik_-_138565250.23-P1P2|1700123K08Rik_-_138565163.23-P1P2
Zfp516	P2	Zfp516_+_82910708.23-P2	GGAAGGGGACCCGGCGTCCA	1	Zfp516_+_82910745.23-P2	GGGCGCCAGCAGGGCTCGGA	2	Zfp516_+_82910708.23-P2|Zfp516_+_82910745.23-P2
Pcm1	P1P2	Pcm1_-_41239602.23-P1P2	GCCCGAGCGTCACGTGACTC	1	Pcm1_+_41239638.23-P1P2	GCGGGGGCGAGAACTCGCCG	2	Pcm1_-_41239602.23-P1P2|Pcm1_+_41239638.23-P1P2
Commd8	P1P2	Commd8_-_72168375.23-P1P2	GaggggCGGTCGAGACTGAG	1	Commd8_+_72168502.23-P1P2	GAGGCCCTGGGTTCAAATAC	2	Commd8_-_72168375.23-P1P2|Commd8_+_72168502.23-P1P2
Rabl3	P1P2	Rabl3_+_37539695.23-P1P2	GTGGCTGAAGCCGGTAGTTG	1	Rabl3_+_37539718.23-P1P2	GCTTGTCTCGCAAGTGGCGT	2	Rabl3_+_37539695.23-P1P2|Rabl3_+_37539718.23-P1P2
Abcg2	P1P2	Abcg2_+_58640402.23-P1P2	GGCACAGGCTCCTGGACGGA	1	Abcg2_+_58640438.23-P1P2	GCAGCTGGACACATGTGGGC	2	Abcg2_+_58640402.23-P1P2|Abcg2_+_58640438.23-P1P2
Syne2	P1P2	Syne2_+_75818237.23-P1P2	GgcccggAGCAGCGCACTGG	1	Syne2_-_75818188.23-P1P2	GTCACTCCCGCCACCTGCAA	2	Syne2_+_75818237.23-P1P2|Syne2_-_75818188.23-P1P2
Cnga3	P1P2	Cnga3_+_37218183.23-P1P2	GCACACTTGCTTGTATTCAg	1	Cnga3_+_37218021.23-P1P2	GAGTGAGGACAGTAAAGATC	2	Cnga3_+_37218183.23-P1P2|Cnga3_+_37218021.23-P1P2
Art1	P1P2	Art1_+_102101490.23-P1P2	GGGGCTGCAGCCCTCTCACC	1	Art1_-_102101577.23-P1P2	GCGGCAGCTCTTATTGTTTT	2	Art1_+_102101490.23-P1P2|Art1_-_102101577.23-P1P2
Trim17	P1P2	Trim17_+_58954376.23-P1P2	GCCCAAGAAAGGCTCCAAAA	1	Trim17_+_58954616.23-P1P2	GCTAGACTGCACCTTCCTAT	2	Trim17_+_58954376.23-P1P2|Trim17_+_58954616.23-P1P2
Dbr1	P1P2	Dbr1_+_99575728.23-P1P2	GGGGAAGGGCCCGGTCAAGC	1	Dbr1_+_99575651.23-P1P2	GTGCGTGCTAGCAATCTAGT	2	Dbr1_+_99575728.23-P1P2|Dbr1_+_99575651.23-P1P2
Sync	P1P2	Sync_-_129287464.23-P1P2	GCAACCAGGGCCAGAAGGAA	1	Sync_-_129287307.23-P1P2	GCGGCTCCAAGCCCTTGCGT	2	Sync_-_129287464.23-P1P2|Sync_-_129287307.23-P1P2
Rab39	P1P2	Rab39_-_53706433.23-P1P2	GGGCCGGGCCCCAGCTGTAA	1	Rab39_-_53706515.23-P1P2	GAGGGGCGCGGCGAGAGCGT	2	Rab39_-_53706433.23-P1P2|Rab39_-_53706515.23-P1P2
Gtf3c4	P1P2	Gtf3c4_-_28840429.23-P1P2	GTGGAAAGTGCGCTCCGGTA	1	Gtf3c4_-_28840440.23-P1P2	GCTCCGGTAGGGCTGACCCG	2	Gtf3c4_-_28840429.23-P1P2|Gtf3c4_-_28840440.23-P1P2
Odc1	P1P2	Odc1_-_17544761.23-P1P2	GGGAGCGCGGGGCGTATGGG	1	Odc1_+_17544784.23-P1P2	GgccgggcgcgTCAGTGGGG	2	Odc1_-_17544761.23-P1P2|Odc1_+_17544784.23-P1P2
Rnf121	P1P2	Rnf121_-_102065232.23-P1P2	GCTGGGCGGAGCAGCAAGAC	1	Rnf121_-_102065235.23-P1P2	GGGCGGAGCAGCAAGACCGG	2	Rnf121_-_102065232.23-P1P2|Rnf121_-_102065235.23-P1P2
Lgi1	P1P2	Lgi1_-_38264674.23-P1P2	GCCACCTCGCAGCACCTCAC	1	Lgi1_+_38264632.23-P1P2	GGGAGCGAGCCAACTGCTGG	2	Lgi1_-_38264674.23-P1P2|Lgi1_+_38264632.23-P1P2
Zfp64	P1P2	Zfp64_-_168955568.23-P1P2	GATCCCGGGGTGCTCCCCTA	1	Zfp64_-_168955596.23-P1P2	GCGGCAGCGTAACACCGGGG	2	Zfp64_-_168955568.23-P1P2|Zfp64_-_168955596.23-P1P2
Foxb2	ENSMUST00000072915.2	Foxb2_+_16873908.23-ENSMUST00000072915.2	GTAAAGCTGGCGAGTCTCTC	1	Foxb2_-_16873997.23-ENSMUST00000072915.2	GGCTCTGGAGCGAAAGGCTG	2	Foxb2_+_16873908.23-ENSMUST00000072915.2|Foxb2_-_16873997.23-ENSMUST00000072915.2
Commd2	P1P2	Commd2_+_57651755.23-P1P2	GCAACCGGAACCCAAAGCAT	1	Commd2_-_57651832.23-P1P2	GACTCTATAGGAGTGAAGGT	2	Commd2_+_57651755.23-P1P2|Commd2_-_57651832.23-P1P2
Fhad1	P1P2	Fhad1_+_142015210.23-P1P2	GacacGGGCGGgagagaaag	1	Fhad1_-_142015158.23-P1P2	GGAGGGGCGTGGCCTTGCGG	2	Fhad1_+_142015210.23-P1P2|Fhad1_-_142015158.23-P1P2
Msx2	P1P2	Msx2_+_53472893.23-P1P2	GTCCAGGGAGAGCCAATCGG	1	Msx2_-_53472885.23-P1P2	GGGCCCTGCTCCTGACGCCA	2	Msx2_+_53472893.23-P1P2|Msx2_-_53472885.23-P1P2
Gmfb	P1P2	Gmfb_+_46822352.23-P1P2	GAATCTGCGCACCGCTTGGC	1	Gmfb_+_46822212.23-P1P2	GGCGGCCGCGTCCTTAGGTG	2	Gmfb_+_46822352.23-P1P2|Gmfb_+_46822212.23-P1P2
Zbtb49	P1P2	Zbtb49_+_38220517.23-P1P2	GCCCGCGCAGAACTCAATCC	1	Zbtb49_+_38220486.23-P1P2	GCCAACGCGCGTGCGCGCAG	2	Zbtb49_+_38220517.23-P1P2|Zbtb49_+_38220486.23-P1P2
Psd3	ENSMUST00000093468.5	Psd3_-_67911072.23-ENSMUST00000093468.5	GCACACACGAGCCACTGTGT	1	Psd3_+_67910992.23-ENSMUST00000093468.5	GGAAACCCCAACAGTAAACA	2	Psd3_-_67911072.23-ENSMUST00000093468.5|Psd3_+_67910992.23-ENSMUST00000093468.5
Tmem132e	P1P2	Tmem132e_-_82388742.23-P1P2	GGCAGCCACCGGGACGTTGG	1	Tmem132e_-_82388770.23-P1P2	GGGCCCTGGGACCGCACGTG	2	Tmem132e_-_82388742.23-P1P2|Tmem132e_-_82388770.23-P1P2
Spice1	P1P2	Spice1_-_44347239.23-P1P2	GAAGTGCGGTATGTGGAGGT	1	Spice1_-_44347381.23-P1P2	GCGGATGTACGCAAAGGCGT	2	Spice1_-_44347239.23-P1P2|Spice1_-_44347381.23-P1P2
Ldhc	P1P2	Ldhc_+_46861134.23-P1P2	GCACCTGCATGGCCTACCTC	1	Ldhc_-_46861037.23-P1P2	GCAGAAAAGTGGCCTTTAAA	2	Ldhc_+_46861134.23-P1P2|Ldhc_-_46861037.23-P1P2
Olfr390	ENSMUST00000120081.1	Olfr390_+_73782783.23-ENSMUST00000120081.1	GACTCAGCTCTGATGACATC	1	Olfr390_-_73782919.23-ENSMUST00000120081.1	GGCAGGCTCCCTTAGGTCCA	2	Olfr390_+_73782783.23-ENSMUST00000120081.1|Olfr390_-_73782919.23-ENSMUST00000120081.1
Pcdhb5	P1P2	Pcdhb5_-_37320128.23-P1P2	GTCCCACCAATTGGCCATAT	1	Pcdhb5_+_37320179.23-P1P2	GTGGCGGTTATTTCATCGTC	2	Pcdhb5_-_37320128.23-P1P2|Pcdhb5_+_37320179.23-P1P2
Acy1	P1P2	Acy1_+_106438382.23-P1P2	GTCAGAGAGGAGGACCCAGT	1	Acy1_+_106438415.23-P1P2	GCCAAGGCGGGGTGTCGGGA	2	Acy1_+_106438382.23-P1P2|Acy1_+_106438415.23-P1P2
Kcnj13	P1P2	Kcnj13_-_87394926.23-P1P2	GAAAGCCTCTAGAACTGACG	1	Kcnj13_-_87394932.23-P1P2	GTCTAGAACTGACGTGGAGA	2	Kcnj13_-_87394926.23-P1P2|Kcnj13_-_87394932.23-P1P2
Ncapg	P1P2	Ncapg_+_45669770.23-P1P2	GCCCGCTGCTGGGACGCCTG	1	Ncapg_+_45669765.23-P1P2	GTGCTGGGACGCCTGGGGTG	2	Ncapg_+_45669770.23-P1P2|Ncapg_+_45669765.23-P1P2
Ppih	P1P2	Ppih_-_119320586.23-P1P2	GGCGCCCCGCCCCGGAAGTG	1	Ppih_-_119320656.23-P1P2	GAGCTGAGGGGAGGAAACGC	2	Ppih_-_119320586.23-P1P2|Ppih_-_119320656.23-P1P2
Syngap1	ENSMUST00000081285.3	Syngap1_+_26941145.23-ENSMUST00000081285.3	GCCGGAAAAGGAGAGAACGA	1	Syngap1_-_26941276.23-ENSMUST00000081285.3	GCTGCTGCCGCTGCTGCCGT	2	Syngap1_+_26941145.23-ENSMUST00000081285.3|Syngap1_-_26941276.23-ENSMUST00000081285.3
Bccip	P1P2	Bccip_-_133709100.23-P1P2	GGGAAGGAACGCAGACGGAT	1	Bccip_-_133709095.23-P1P2	GCCGGCGGAAGGAACGCAGA	2	Bccip_-_133709100.23-P1P2|Bccip_-_133709095.23-P1P2
Lars2	P1P2	Lars2_+_123366822.23-P1P2	GCCCCCAAGCTGCTCGCCCA	1	Lars2_-_123366841.23-P1P2	GAGCCCTGGGCGAGCAGCTT	2	Lars2_+_123366822.23-P1P2|Lars2_-_123366841.23-P1P2
Cga	P1P2	Cga_-_34893616.23-P1P2	GTAAAAACAAAACTGATCTG	1	Cga_+_34893699.23-P1P2	GCCCAGCTGCACATAAGCTC	2	Cga_-_34893616.23-P1P2|Cga_+_34893699.23-P1P2
1500015O10Rik	P1P2	1500015O10Rik_+_43730661.23-P1P2	GAAGGGCCGCGTGGCCAAAG	1	1500015O10Rik_-_43730555.23-P1P2	GGGCCTGGGTTGCTAGGGGA	2	1500015O10Rik_+_43730661.23-P1P2|1500015O10Rik_-_43730555.23-P1P2
Stat5a	P1P2	Stat5a_-_100860357.23-P1P2	GCCGGGGCGCCGGTAATCGA	1	Stat5a_-_100860341.23-P1P2	GCGCCCTGGCGCACTCGCCG	2	Stat5a_-_100860357.23-P1P2|Stat5a_-_100860341.23-P1P2
Hipk4	P1P2	Hipk4_+_27523187.23-P1P2	GAGTCCCAGGCTGGAATGGA	1	Hipk4_+_27522972.23-P1P2	GtgtgtgtgtgAAGCATGGA	2	Hipk4_+_27523187.23-P1P2|Hipk4_+_27522972.23-P1P2
Oip5	P1P2	Oip5_+_119618663.23-P1P2	GAAGACTGCTGTAAGTTCAT	1	Oip5_+_119618612.23-P1P2	GTGCGGGCCAGTAGCGTGAT	2	Oip5_+_119618663.23-P1P2|Oip5_+_119618612.23-P1P2
Olfr1440	ENSMUST00000054567.1	Olfr1440_-_12393916.23-ENSMUST00000054567.1	GTAACCTGTAAGATTGTCAA	1	Olfr1440_-_12393852.23-ENSMUST00000054567.1	GATACAAACCTAGTTGGGAA	2	Olfr1440_-_12393916.23-ENSMUST00000054567.1|Olfr1440_-_12393852.23-ENSMUST00000054567.1
Slc16a4	P1P2	Slc16a4_-_107291152.23-P1P2	GTTACCCAATGGCTTTTGGC	1	Slc16a4_+_107291103.23-P1P2	GGAGAAAATCTTCTCAAGTC	2	Slc16a4_-_107291152.23-P1P2|Slc16a4_+_107291103.23-P1P2
Foxe1	P1P2	Foxe1_-_46343511.23-P1P2	GCTCCCCGCTCTGACGTTTT	1	Foxe1_+_46343473.23-P1P2	GGGGAGGGCGCCTGGAGATT	2	Foxe1_-_46343511.23-P1P2|Foxe1_+_46343473.23-P1P2
Ankrd28	P1P2	Ankrd28_-_31830804.23-P1P2	GGGGCTCCGCCTCTCCGCGG	1	Ankrd28_+_31830679.23-P1P2	GGGCGGTGGTGGTAATATTG	2	Ankrd28_-_31830804.23-P1P2|Ankrd28_+_31830679.23-P1P2
Ly6e	P1P2	Ly6e_-_74955490.23-P1P2	GACCCCTGTCGTAGTCTCAG	1	Ly6e_+_74955544.23-P1P2	GCTGGTGGGGAGAACGACCC	2	Ly6e_-_74955490.23-P1P2|Ly6e_+_74955544.23-P1P2
Ppp6c	P1P2	Ppp6c_+_39226373.23-P1P2	GAGAGAGAGCGGAACGGGTC	1	Ppp6c_+_39226458.23-P1P2	GGAGAGCTACGGGTCCCAGT	2	Ppp6c_+_39226373.23-P1P2|Ppp6c_+_39226458.23-P1P2
Gm3448	P2	Gm3448_-_15010259.23-P2	GAGAGCGCCGCGACCCGAGC	1	Gm3448_-_15010276.23-P2	GGCCGGAAGCGATGGAGGTA	2	Gm3448_-_15010259.23-P2|Gm3448_-_15010276.23-P2
Ndrg3	P1P2	Ndrg3_+_156992178.23-P1P2	GGCGCTGCTAGAGACTCTGT	1	Ndrg3_-_156992177.23-P1P2	GTACAGACAAAATGGTGGTC	2	Ndrg3_+_156992178.23-P1P2|Ndrg3_-_156992177.23-P1P2
Spaca1	P1P2	Spaca1_-_34050207.23-P1P2	GAACTCATGTGGGCGGGAAG	1	Spaca1_+_34050134.23-P1P2	GGAAGTCTGGGCTTCGAATG	2	Spaca1_-_34050207.23-P1P2|Spaca1_+_34050134.23-P1P2
Elane	P1P2	Elane_+_79886208.23-P1P2	GCCTCCCTGGGACACGACAG	1	Elane_+_79886197.23-P1P2	GCACGACAGTGGGGGTGTCA	2	Elane_+_79886208.23-P1P2|Elane_+_79886197.23-P1P2
Nkx2-9	P1P2	Nkx2-9_-_56613460.23-P1P2	GAAAGTGGGGACAGATAATG	1	Nkx2-9_-_56613446.23-P1P2	GTGTCTGATTAGACCAAAGT	2	Nkx2-9_-_56613460.23-P1P2|Nkx2-9_-_56613446.23-P1P2
Slc35b4	P1P2	Slc35b4_+_34177043.23-P1P2	GGACGCCCCCTCAAATGAAT	1	Slc35b4_+_34177075.23-P1P2	GTCTGCTGGGACATGTAGTT	2	Slc35b4_+_34177043.23-P1P2|Slc35b4_+_34177075.23-P1P2
Fam189b	P1	Fam189b_+_89183129.23-P1	GGGTGCGTGGTGCGGAGGAG	1	Fam189b_-_89183048.23-P1	GAGGGCGAGGCTAGGGATGG	2	Fam189b_+_89183129.23-P1|Fam189b_-_89183048.23-P1
Ehmt1	P1P2	Ehmt1_+_24919721.23-P1P2	GTGGCCTCGCCTCCAGACGC	1	Ehmt1_+_24919700.23-P1P2	GGCGCCGCACGGGTGGGTCC	2	Ehmt1_+_24919721.23-P1P2|Ehmt1_+_24919700.23-P1P2
Fa2h	P1P2	Fa2h_-_111394002.23-P1P2	GCGGCCCGCCAGGTAGCCCT	1	Fa2h_-_111394013.23-P1P2	GGTAGCCCTGGGCAGGTAGA	2	Fa2h_-_111394002.23-P1P2|Fa2h_-_111394013.23-P1P2
Mepce	P1P2	Mepce_+_137786817.23-P1P2	GTCCCCGCCCCTAGAGCGGA	1	Mepce_-_137786787.23-P1P2	GTGGACTTGCGCGGGTTGAA	2	Mepce_+_137786817.23-P1P2|Mepce_-_137786787.23-P1P2
Slc36a2	P1P2	Slc36a2_+_55185191.23-P1P2	GTAACTGCACTGTGGTTGAT	1	Slc36a2_+_55185086.23-P1P2	GGCGGGGTGTCCATGCAGGT	2	Slc36a2_+_55185191.23-P1P2|Slc36a2_+_55185086.23-P1P2
Omd	P1P2	Omd_+_49582691.23-P1P2	GGTAACTCAGTGTGCAGACA	1	Omd_+_49582543.23-P1P2	GGCTCTTGGTCAGATTTATG	2	Omd_+_49582691.23-P1P2|Omd_+_49582543.23-P1P2
Krtap3-2	P1P2	Krtap3-2_+_99556930.23-P1P2	GAGGGTGTCACAAACAAAAC	1	Krtap3-2_-_99557147.23-P1P2	GTGCTCAAGTGACAACTCAT	2	Krtap3-2_+_99556930.23-P1P2|Krtap3-2_-_99557147.23-P1P2
Xkr5	P1P2	Xkr5_-_18951111.23-P1P2	GGAACCGACAGGTTCTTAGG	1	Xkr5_+_18951151.23-P1P2	GGTGTCTTACAGCCGTTAGG	2	Xkr5_-_18951111.23-P1P2|Xkr5_+_18951151.23-P1P2
C1qtnf4	P1P2	C1qtnf4_-_90885678.23-P1P2	GCACCCGGTGGGTAACGCTC	1	C1qtnf4_+_90885755.23-P1P2	GAGGGGAGAGCGGAGGACGA	2	C1qtnf4_-_90885678.23-P1P2|C1qtnf4_+_90885755.23-P1P2
Rnaseh2a	P1	Rnaseh2a_+_84966105.23-P1	GACGCCGGAGGGCGCATCGA	1	Rnaseh2a_+_84966102.23-P1	GCCGGAGGGCGCATCGAGGG	2	Rnaseh2a_+_84966105.23-P1|Rnaseh2a_+_84966102.23-P1
Plac8	P2	Plac8_+_100562920.23-P2	GGAGGCCTCTCTCCTCTCGG	1	Plac8_-_100563098.23-P2	GCATTGGCCTGGGACAAGGT	2	Plac8_+_100562920.23-P2|Plac8_-_100563098.23-P2
Cd96	P1P2	Cd96_-_46120216.23-P1P2	GTCAACTCTACCACAGGGTT	1	Cd96_-_46120244.23-P1P2	GGATCGCTTGGCAAGTCCCC	2	Cd96_-_46120216.23-P1P2|Cd96_-_46120244.23-P1P2
Scrt1	P1P2	Scrt1_-_76522715.23-P1P2	GTCTCCTGGGAGGGGTCCTG	1	Scrt1_+_76522697.23-P1P2	GCATCCCCAGGACCCCTCCC	2	Scrt1_-_76522715.23-P1P2|Scrt1_+_76522697.23-P1P2
Dmkn	P1P2	Dmkn_-_30763682.23-P1P2	GGGCCCTGAGTCACTGGAGG	1	Dmkn_-_30763676.23-P1P2	GTGGATAGGCCCTGAGTCAC	2	Dmkn_-_30763682.23-P1P2|Dmkn_-_30763676.23-P1P2
Map2	P1	Map2_+_66175201.23-P1	Gccccagcctggctccgcca	1	Map2_+_66175055.23-P1	GCCAAGGCCAAGGGCGGCGA	2	Map2_+_66175201.23-P1|Map2_+_66175055.23-P1
Hnrnpll	P1P2	Hnrnpll_+_80062366.23-P1P2	GGGAGGCGGAAGTTCGGCAA	1	Hnrnpll_+_80062313.23-P1P2	GCGCCCGGCGGCAGTCAAGG	2	Hnrnpll_+_80062366.23-P1P2|Hnrnpll_+_80062313.23-P1P2
Nxph2	P1P2	Nxph2_+_23321232.23-P1P2	GTGGAGGTCTGAGGATTCGA	1	Nxph2_+_23321193.23-P1P2	GCGACTGCCGGGACAGCTAG	2	Nxph2_+_23321232.23-P1P2|Nxph2_+_23321193.23-P1P2
Brwd3	P1P2	Brwd3_-_108834439.23-P1P2	Ggggtggagccatagaaaga	1	Brwd3_-_108834479.23-P1P2	GgAGCCGCTTGCAAAGCTCC	2	Brwd3_-_108834439.23-P1P2|Brwd3_-_108834479.23-P1P2
Ap1s3	P1P2	Ap1s3_+_79672193.23-P1P2	GTGGGGCTAGCGGTGATGAG	1	Ap1s3_+_79672167.23-P1P2	GGCGAACTGCGGGGTCCCCG	2	Ap1s3_+_79672193.23-P1P2|Ap1s3_+_79672167.23-P1P2
Psmb5	P1P2	Psmb5_-_54618142.23-P1P2	GGGTCTGTGTTCACCTAGGA	1	Psmb5_-_54618146.23-P1P2	GTGTGTTCACCTAGGAAGGA	2	Psmb5_-_54618142.23-P1P2|Psmb5_-_54618146.23-P1P2
4930444G20Rik	P1P2	4930444G20Rik_+_22068752.23-P1P2	GGACTATGCTGGGAGGACTT	1	4930444G20Rik_+_22068763.23-P1P2	GACTAGTACTATGACTATGC	2	4930444G20Rik_+_22068752.23-P1P2|4930444G20Rik_+_22068763.23-P1P2
Lyrm5	P1P2	Lyrm5_+_145211087.23-P1P2	GACTACAGGCAGCAGTGTAT	1	Lyrm5_+_145211039.23-P1P2	GCGGGGCATCAGGCGGAAAT	2	Lyrm5_+_145211087.23-P1P2|Lyrm5_+_145211039.23-P1P2
Clec16a	P1P2	Clec16a_+_10545255.23-P1P2	GGACTCGCGCGACCGTCCAG	1	Clec16a_+_10545201.23-P1P2	GCTGTCAAGGTGGGCGGAAA	2	Clec16a_+_10545255.23-P1P2|Clec16a_+_10545201.23-P1P2
Haus3	P1P2	Haus3_+_34169599.23-P1P2	GCAGAGGCGGGGCTAAGGGG	1	Haus3_+_34169623.23-P1P2	GAGCCTAGCGGGAAGGACGG	2	Haus3_+_34169599.23-P1P2|Haus3_+_34169623.23-P1P2
Olfr1234	ENSMUST00000099783.1	Olfr1234_+_89363575.23-ENSMUST00000099783.1	GAAAATGAGTCAGACAACAG	1	Olfr1234_+_89363534.23-ENSMUST00000099783.1	GTAACCAAGCATGGGAGAAT	2	Olfr1234_+_89363575.23-ENSMUST00000099783.1|Olfr1234_+_89363534.23-ENSMUST00000099783.1
Slc9a3r2	P2	Slc9a3r2_+_24644974.23-P2	GGAACCTGGGCCACAGTGGG	1	Slc9a3r2_-_24645180.23-P2	GAGTGGAGACAGGGAGTCAA	2	Slc9a3r2_+_24644974.23-P2|Slc9a3r2_-_24645180.23-P2
Gsg2	P1P2	Gsg2_+_73138456.23-P1P2	GACTCTGGGTGCACTCAGTG	1	Gsg2_+_73138348.23-P1P2	GAGGCTGCGCAGCCGAGGGC	2	Gsg2_+_73138456.23-P1P2|Gsg2_+_73138348.23-P1P2
Suco	P1P2	Suco_+_161876835.23-P1P2	GTGGCCCGCGCTGTGACTTG	1	Suco_+_161876811.23-P1P2	GCGCGAGCCGAGAGGGACGT	2	Suco_+_161876835.23-P1P2|Suco_+_161876811.23-P1P2
Vangl1	P1P2	Vangl1_-_102204759.23-P1P2	GCCCACCTGCAGCGGAGGGC	1	Vangl1_-_102204755.23-P1P2	GCCGGCCCACCTGCAGCGGA	2	Vangl1_-_102204759.23-P1P2|Vangl1_-_102204755.23-P1P2
Pfkfb2	P1P2	Pfkfb2_+_130715874.23-P1P2	GCCAGCGTGCCTCCAGGTGA	1	Pfkfb2_-_130715844.23-P1P2	GGGGTTGGGGCGAGTCACGT	2	Pfkfb2_+_130715874.23-P1P2|Pfkfb2_-_130715844.23-P1P2
Hyal3	P1P2	Hyal3_-_107580589.23-P1P2	GGGCAGGCGGAGCTGAACAC	1	Hyal3_-_107580504.23-P1P2	GTCCACCAACCCACGAGGAC	2	Hyal3_-_107580589.23-P1P2|Hyal3_-_107580504.23-P1P2
Utp14a	P1P2	Utp14a_-_48256758.23-P1P2	GGCAGTGCGGACCAACTGGC	1	Utp14a_-_48256645.23-P1P2	GGCCCTCACCACACTAATCT	2	Utp14a_-_48256758.23-P1P2|Utp14a_-_48256645.23-P1P2
Pcdh7	P1	Pcdh7_+_57717802.23-P1	GCATCCGCGCGACACTGGCC	1	Pcdh7_+_57717772.23-P1	GCACGACCGGGCACTCCTAA	2	Pcdh7_+_57717802.23-P1|Pcdh7_+_57717772.23-P1
Necab3	P1P2	Necab3_+_154559044.23-P1P2	GTGCCTGCCCACACCCGACT	1	Necab3_-_154559052.23-P1P2	GAACCGGCGCTCCACCCAGT	2	Necab3_+_154559044.23-P1P2|Necab3_-_154559052.23-P1P2
Olfm1	P1	Olfm1_-_28205364.23-P1	GGGGCGAGACAAAACCGTGA	1	Olfm1_+_28205495.23-P1	GGCGAGGTCTGCAAACCGGT	2	Olfm1_-_28205364.23-P1|Olfm1_+_28205495.23-P1
Golga7b	P1P2	Golga7b_-_42255758.23-P1P2	GCGCGGGCGGGGCTCCTCTC	1	Golga7b_-_42255651.23-P1P2	GGAAGCTAGCGCAACGCTCT	2	Golga7b_-_42255758.23-P1P2|Golga7b_-_42255651.23-P1P2
Gbf1	P1P2	Gbf1_+_46152352.23-P1P2	GGTAGGTAGGGGACAGCCAA	1	Gbf1_+_46152265.23-P1P2	GTGAAGAGGTGGGGTCAGAT	2	Gbf1_+_46152352.23-P1P2|Gbf1_+_46152265.23-P1P2
Fscb	P1P2	Fscb_+_64475092.23-P1P2	GATTACTAGTGGCTTTCTTG	1	Fscb_-_64475119.23-P1P2	GGAAAGCCACTAGTAATTAA	2	Fscb_+_64475092.23-P1P2|Fscb_-_64475119.23-P1P2
Ldoc1	P1P2	Ldoc1_-_61709310.23-P1P2	GTGGAGCAGGCCAGCCCTGA	1	Ldoc1_+_61709388.23-P1P2	GTGACCCAGGAGCTTCGCTG	2	Ldoc1_-_61709310.23-P1P2|Ldoc1_+_61709388.23-P1P2
Olfr1048	ENSMUST00000099900.1	Olfr1048_-_86237134.23-ENSMUST00000099900.1	Gtgaagagggagtgagtaat	1	Olfr1048_-_86237056.23-ENSMUST00000099900.1	Gatatctggcatttatgcga	2	Olfr1048_-_86237134.23-ENSMUST00000099900.1|Olfr1048_-_86237056.23-ENSMUST00000099900.1
Ccl7	P1P2	Ccl7_+_82045431.23-P1P2	GGCAGAGATGGCAGAGTCAA	1	Ccl7_-_82045694.23-P1P2	GCGGCTGCCTATAAAAGAGG	2	Ccl7_+_82045431.23-P1P2|Ccl7_-_82045694.23-P1P2
Bsph2	P1P2	Bsph2_-_13571241.23-P1P2	GGTGTCATAGTGTTGTCTTT	1	Bsph2_+_13571144.23-P1P2	GTAGGACAAAGAATTCACTG	2	Bsph2_-_13571241.23-P1P2|Bsph2_+_13571144.23-P1P2
Casp2	P1P2	Casp2_+_42264927.23-P1P2	GGAGGCTCGCACAGCCCAAT	1	Casp2_+_42264895.23-P1P2	GGCGCTAGAAGGAACGGGAA	2	Casp2_+_42264927.23-P1P2|Casp2_+_42264895.23-P1P2
Spag4	P1P2	Spag4_-_156065057.23-P1P2	Gtatctcgaaagctaaggtg	1	Spag4_-_156065305.23-P1P2	GGCGCGAGGCAGCTGAGGAA	2	Spag4_-_156065057.23-P1P2|Spag4_-_156065305.23-P1P2
Slc17a5	P1P2	Slc17a5_+_78588082.23-P1P2	GGGAACAGGCAACCAGATAT	1	Slc17a5_-_78588092.23-P1P2	GCCCAGGACACGCCCATATC	2	Slc17a5_+_78588082.23-P1P2|Slc17a5_-_78588092.23-P1P2
Astl	P1P2	Astl_-_127338134.23-P1P2	GCTTAAGCCTTGTGCTCCCA	1	Astl_+_127338259.23-P1P2	GACAGGGCCGGGAGGAAGTT	2	Astl_-_127338134.23-P1P2|Astl_+_127338259.23-P1P2
Slc51b	P1P2	Slc51b_+_65422904.23-P1P2	GAGGCCTGGGTGTGTGCTAA	1	Slc51b_+_65423053.23-P1P2	GAAGAGACAGAGAACCGGAG	2	Slc51b_+_65422904.23-P1P2|Slc51b_+_65423053.23-P1P2
9330159F19Rik	P1P2	9330159F19Rik_-_29211496.23-P1P2	GCTAGCAAGCAGATCTCTCC	1	9330159F19Rik_+_29211546.23-P1P2	GCCTCTGGGTAAACAACTCC	2	9330159F19Rik_-_29211496.23-P1P2|9330159F19Rik_+_29211546.23-P1P2
Ctbp2	P1P2	Ctbp2_+_133123657.23-P1P2	GACAGCCAGCATCCTCTCGG	1	Ctbp2_+_133123584.23-P1P2	GGGGCTGGCAAGAAGGCGCG	2	Ctbp2_+_133123657.23-P1P2|Ctbp2_+_133123584.23-P1P2
Phf21a	P2	Phf21a_+_92185265.23-P2	GagggccgccccAGGGTGAG	1	Phf21a_+_92185297.23-P2	Gtcccggggcggccggccgg	2	Phf21a_+_92185265.23-P2|Phf21a_+_92185297.23-P2
Smim12	P1P2	Smim12_-_127243676.23-P1P2	GGGGAGCCTCCGAGCCGTCA	1	Smim12_+_127243728.23-P1P2	GCCAGCCAGCTACAGAAGAA	2	Smim12_-_127243676.23-P1P2|Smim12_+_127243728.23-P1P2
Tas2r122	ENSMUST00000105077.1	Tas2r122_+_132712042.23-ENSMUST00000105077.1	GCAGTTGAGAGCATACATTT	1	Tas2r122_-_132712019.23-ENSMUST00000105077.1	GTGTGAATCCAAATCTTAAA	2	Tas2r122_+_132712042.23-ENSMUST00000105077.1|Tas2r122_-_132712019.23-ENSMUST00000105077.1
BC030499	P1P2	BC030499_+_78290667.23-P1P2	GACAAGACCAGTCATTACTG	1	BC030499_+_78290701.23-P1P2	GTGATTGTGGTAAGACTTCA	2	BC030499_+_78290667.23-P1P2|BC030499_+_78290701.23-P1P2
Agap3	P1P2	Agap3_-_24451789.23-P1P2	GCGGCCAGCACGCGGTTCTT	1	Agap3_+_24451739.23-P1P2	GCGGCCCCACCCACCCGCGT	2	Agap3_-_24451789.23-P1P2|Agap3_+_24451739.23-P1P2
Polr2d	P1P2	Polr2d_+_31789016.23-P1P2	GGAGAAGGGCAGGTCGGACA	1	Polr2d_+_31788991.23-P1P2	GACACTGCGGGGAGCTCGCG	2	Polr2d_+_31789016.23-P1P2|Polr2d_+_31788991.23-P1P2
Heatr6	P1P2	Heatr6_+_83753811.23-P1P2	GGAGCCTGGCAGACAAGCGG	1	Heatr6_-_83753794.23-P1P2	GGCCCCGCGGGAACTGTCGC	2	Heatr6_+_83753811.23-P1P2|Heatr6_-_83753794.23-P1P2
Sult1a1	P1P2	Sult1a1_-_126676573.23-P1P2	GAGGCCACAGCATGGACAGT	1	Sult1a1_-_126676517.23-P1P2	GTAACCATACTGTGGACTGT	2	Sult1a1_-_126676573.23-P1P2|Sult1a1_-_126676517.23-P1P2
Sde2	P1P2	Sde2_+_180851001.23-P1P2	GGGCCCGGCGTCACGCGAGC	1	Sde2_+_180850966.23-P1P2	GGACAGGAAAGGCCTGCCTG	2	Sde2_+_180851001.23-P1P2|Sde2_+_180850966.23-P1P2
Champ1	P1P2	Champ1_+_13869625.23-P1P2	GGGCCCCTAAGGTTCCCAGC	1	Champ1_-_13869679.23-P1P2	GGCGACCCGGAGGCACGCGA	2	Champ1_+_13869625.23-P1P2|Champ1_-_13869679.23-P1P2
Plcl2	P1P2	Plcl2_+_50509355.23-P1P2	GTACCTCTGGGGTCCTGCCG	1	Plcl2_+_50509097.23-P1P2	GGACACGTGCGCCCACTCCG	2	Plcl2_+_50509355.23-P1P2|Plcl2_+_50509097.23-P1P2
Grid1	P1P2	Grid1_+_34819680.23-P1P2	GGCCGCTCGCCCGCTCGGAG	1	Grid1_+_34819623.23-P1P2	GTACGAGGACGGCACCACGG	2	Grid1_+_34819680.23-P1P2|Grid1_+_34819623.23-P1P2
Lap3	P1P2	Lap3_-_45493284.23-P1P2	GGGCCTGCCGCCCTTCCCTA	1	Lap3_+_45493371.23-P1P2	GCCTGGAGGCGGGACCTCCG	2	Lap3_-_45493284.23-P1P2|Lap3_+_45493371.23-P1P2
Hdlbp	P1	Hdlbp_+_93445698.23-P1	GcggTCTGACGTGTCTCGGC	1	Hdlbp_-_93445802.23-P1	GAGTTCTGCGGCCTGACAGG	2	Hdlbp_+_93445698.23-P1|Hdlbp_-_93445802.23-P1
Fam126a	P1P2	Fam126a_-_24030831.23-P1P2	GGGGGGGGGGCGATTTGAGT	1	Fam126a_-_24030872.23-P1P2	GGTGGTCCGGGAACGCCCAG	2	Fam126a_-_24030831.23-P1P2|Fam126a_-_24030872.23-P1P2
Rin2	P1P2	Rin2_-_145785886.23-P1P2	GCGGGAGGAGAGCTAACTGA	1	Rin2_+_145785955.23-P1P2	GAAAGCTTATAGATTTCATA	2	Rin2_-_145785886.23-P1P2|Rin2_+_145785955.23-P1P2
Ston2	P1P2	Ston2_-_91779376.23-P1P2	GAAGCTCCCGGGGCAAGAAG	1	Ston2_-_91779381.23-P1P2	GCCCGGGGCAAGAAGTGGCT	2	Ston2_-_91779376.23-P1P2|Ston2_-_91779381.23-P1P2
D7Ertd443e	P1	D7Ertd443e_-_134365056.23-P1	GTGTTTAAAGGCTTCCTGTA	1	D7Ertd443e_+_134365160.23-P1	GCGAGAACGTAGGGACAGGT	2	D7Ertd443e_-_134365056.23-P1|D7Ertd443e_+_134365160.23-P1
Tekt4	P1P2	Tekt4_+_25471538.23-P1P2	GGAGCAACAGGGTCACTCAA	1	Tekt4_+_25471494.23-P1P2	GAAAGGGCCAAGCAGTGTct	2	Tekt4_+_25471538.23-P1P2|Tekt4_+_25471494.23-P1P2
BC053393	ENSMUST00000050937.6	BC053393_+_46571353.23-ENSMUST00000050937.6	GACAACACTGGCTTTTGAGA	1	BC053393_+_46571382.23-ENSMUST00000050937.6	GTCACTTGAAGTGTGACTAT	2	BC053393_+_46571353.23-ENSMUST00000050937.6|BC053393_+_46571382.23-ENSMUST00000050937.6
Pbdc1	P1P2	Pbdc1_-_105079656.23-P1P2	GCGCCTGCGTGGCCCGGATA	1	Pbdc1_-_105079496.23-P1P2	GCGCGCGTGAACTGGAAACA	2	Pbdc1_-_105079656.23-P1P2|Pbdc1_-_105079496.23-P1P2
2010107G12Rik	P1P2	2010107G12Rik_+_34948731.23-P1P2	GGGTGGAGCTGCGTGgggga	1	2010107G12Rik_-_34948874.23-P1P2	GAACATGCCGCCAATCACGG	2	2010107G12Rik_+_34948731.23-P1P2|2010107G12Rik_-_34948874.23-P1P2
Vmn1r42	ENSMUST00000089419.2	Vmn1r42_+_89845649.23-ENSMUST00000089419.2	GTGAACAGCTATGAAGATCT	1	Vmn1r42_-_89845824.23-ENSMUST00000089419.2	GGCAGGAACAGCATCGTATT	2	Vmn1r42_+_89845649.23-ENSMUST00000089419.2|Vmn1r42_-_89845824.23-ENSMUST00000089419.2
Itpr2	P1P2	Itpr2_-_146502321.23-P1P2	GGGGACGGGCCACCCCGAAG	1	Itpr2_-_146502302.23-P1P2	GgggcggggcCAGTTCTCGG	2	Itpr2_-_146502321.23-P1P2|Itpr2_-_146502302.23-P1P2
Olfr384	ENSMUST00000072993.1	Olfr384_-_73602299.23-ENSMUST00000072993.1	GGAACAGACAAAAGTCAACC	1	Olfr384_-_73602372.23-ENSMUST00000072993.1	GAAACAGTGTACAAATATCT	2	Olfr384_-_73602299.23-ENSMUST00000072993.1|Olfr384_-_73602372.23-ENSMUST00000072993.1
Ddhd1	P1P2	Ddhd1_+_45658381.23-P1P2	GCAGGGGCGTGGAAGCGAGG	1	Ddhd1_+_45658292.23-P1P2	GTGACCCCCGCTTCCAGGCG	2	Ddhd1_+_45658381.23-P1P2|Ddhd1_+_45658292.23-P1P2
Gstm6	P1P2	Gstm6_+_107943933.23-P1P2	GGGGCAGAACAGGTCCTAGC	1	Gstm6_-_107943868.23-P1P2	GACCGAAGGCAGTGATTGAT	2	Gstm6_+_107943933.23-P1P2|Gstm6_-_107943868.23-P1P2
Asrgl1	P1P2	Asrgl1_+_9135703.23-P1P2	GCTAGATCTGGAGTCCCGGA	1	Asrgl1_+_9135746.23-P1P2	GAGGGTCCCGCGTGCTACTA	2	Asrgl1_+_9135703.23-P1P2|Asrgl1_+_9135746.23-P1P2
Krt15	P1P2	Krt15_+_100135978.23-P1P2	GGGCCCCCACCCCCTCTGAA	1	Krt15_+_100136281.23-P1P2	GCCCACAAGCTGTCAGTGGG	2	Krt15_+_100135978.23-P1P2|Krt15_+_100136281.23-P1P2
Sox14	P1P2	Sox14_-_99876293.23-P1P2	GTCAGCAGCAGGGAAGGCGA	1	Sox14_+_99876325.23-P1P2	GCCCCCATCAGGGACGCTCC	2	Sox14_-_99876293.23-P1P2|Sox14_+_99876325.23-P1P2
Atox1	P1P2	Atox1_+_55461327.23-P1P2	GAACCTAGCTCTAACTGGAC	1	Atox1_+_55461367.23-P1P2	GGAAAGGCACGGTAAGCAAG	2	Atox1_+_55461327.23-P1P2|Atox1_+_55461367.23-P1P2
Fbxo36	P1P2	Fbxo36_-_84839581.23-P1P2	GCCCTCCAAGGGACCAGGAA	1	Fbxo36_+_84839595.23-P1P2	GCCAGCGGAGGGATACCAAG	2	Fbxo36_-_84839581.23-P1P2|Fbxo36_+_84839595.23-P1P2
Gdap1	P1P2	Gdap1_-_17145169.23-P1P2	GTATGCCCAAGCAACGTCCA	1	Gdap1_+_17145296.23-P1P2	GGGATGCTGTGCTGCCTAGT	2	Gdap1_-_17145169.23-P1P2|Gdap1_+_17145296.23-P1P2
Car2	P1P2	Car2_+_14886507.23-P1P2	GGGCCCCCGCACCTTGCTTG	1	Car2_+_14886527.23-P1P2	GCGGAGGCCTCGGTGTTCGA	2	Car2_+_14886507.23-P1P2|Car2_+_14886527.23-P1P2
Snx17	P1P2	Snx17_+_31193089.23-P1P2	GACTCCGCGGGAGGCATCAG	1	Snx17_+_31193102.23-P1P2	GCCGCTGGGGACTGACTCCG	2	Snx17_+_31193089.23-P1P2|Snx17_+_31193102.23-P1P2
Fads2	P1P2	Fads2_+_10101633.23-P1P2	GAAGCCAGGGGTACTCCTGA	1	Fads2_+_10101664.23-P1P2	GCGGAGGAAGGGGACCGCTT	2	Fads2_+_10101633.23-P1P2|Fads2_+_10101664.23-P1P2
Gnat2	P1P2	Gnat2_+_108092869.23-P1P2	GAATGCAGGTGCTGGAGCTC	1	Gnat2_-_108092824.23-P1P2	GAGTGAGTCCACAGGACCGG	2	Gnat2_+_108092869.23-P1P2|Gnat2_-_108092824.23-P1P2
Baat	P1P2	Baat_-_49506733.23-P1P2	Gctcctgtgtacccagaact	1	Baat_+_49506673.23-P1P2	GgcAAAGGACgtggtttcag	2	Baat_-_49506733.23-P1P2|Baat_+_49506673.23-P1P2
Slc22a23	P1P2	Slc22a23_-_34345388.23-P1P2	GACCGCCCGGACAGACGCAG	1	Slc22a23_-_34345426.23-P1P2	GCGGGCCGCTGCAAGATCCC	2	Slc22a23_-_34345388.23-P1P2|Slc22a23_-_34345426.23-P1P2
Lrig2	P1P2	Lrig2_+_104512082.23-P1P2	GCTAGTGCGCCCACAAGCGG	1	Lrig2_+_104511949.23-P1P2	GCCGACGCAACCTCATCCCG	2	Lrig2_+_104512082.23-P1P2|Lrig2_+_104511949.23-P1P2
Clca1	P1P2	Clca1_+_144760919.23-P1P2	GAAGGCAGCTGTTTCTGTTC	1	Clca1_-_144760961.23-P1P2	GTAGCTGCAGCTATGAACTT	2	Clca1_+_144760919.23-P1P2|Clca1_-_144760961.23-P1P2
Trip12	P1P2	Trip12_-_84839581.23-P1P2	GCCCTCCAAGGGACCAGGAA	1	Trip12_+_84839541.23-P1P2	GGGGATCGGAAGGAGACTGG	2	Trip12_-_84839581.23-P1P2|Trip12_+_84839541.23-P1P2
Ncs1	P1P2	Ncs1_-_31245765.23-P1P2	GGGCGCCGGGCGATGAGTGG	1	Ncs1_-_31245632.23-P1P2	GCACGCCGCTGCGGAGAGGG	2	Ncs1_-_31245765.23-P1P2|Ncs1_-_31245632.23-P1P2
Zfp524	P1P2	Zfp524_+_5015336.23-P1P2	GGCGCCCGCGGGGAACAAAG	1	Zfp524_+_5015450.23-P1P2	GGGGCCCAGCCCCTAGGCGG	2	Zfp524_+_5015336.23-P1P2|Zfp524_+_5015450.23-P1P2
Cpne8	P1P2	Cpne8_-_90679519.23-P1P2	GCCGCCCTGGGGCAGCCCCC	1	Cpne8_+_90679637.23-P1P2	GGTGGGGAGCATATCAGCTG	2	Cpne8_-_90679519.23-P1P2|Cpne8_+_90679637.23-P1P2
Gm11127	P1P2	Gm11127_+_36058632.23-P1P2	GCAAGGTTCAGTGCAGAAGG	1	Gm11127_+_36058635.23-P1P2	GACACAAGGTTCAGTGCAGA	2	Gm11127_+_36058632.23-P1P2|Gm11127_+_36058635.23-P1P2
Syt6	P1P2	Syt6_-_103575915.23-P1P2	GGTTCAGGATCTAGGATCCA	1	Syt6_+_103575806.23-P1P2	GACCCTGGCCAATCGCTCCT	2	Syt6_-_103575915.23-P1P2|Syt6_+_103575806.23-P1P2
Fzd1	P1P2	Fzd1_-_4758201.23-P1P2	GGGAGCCCGCAGCAGACCGG	1	Fzd1_+_4758157.23-P1P2	GGTCCGGGCTCGGAGGGAAA	2	Fzd1_-_4758201.23-P1P2|Fzd1_+_4758157.23-P1P2
Lta4h	P1P2	Lta4h_+_93453262.23-P1P2	GAGGTGCGGGGAGGAACCGA	1	Lta4h_+_93453285.23-P1P2	GCTAGACAGCATGGGATTGG	2	Lta4h_+_93453262.23-P1P2|Lta4h_+_93453285.23-P1P2
Usp43	P1P2	Usp43_+_67922346.23-P1P2	GGAAGGCGAGCCGAGGTGAA	1	Usp43_+_67922300.23-P1P2	GGCGGGGAAGTCCACTAGGC	2	Usp43_+_67922346.23-P1P2|Usp43_+_67922300.23-P1P2
Tpr	P1P2	Tpr_-_150393169.23-P1P2	GCGGCCTGAGCGCGCGTAAG	1	Tpr_-_150393217.23-P1P2	GAGTCTCTGGGGCTGGAAAC	2	Tpr_-_150393169.23-P1P2|Tpr_-_150393217.23-P1P2
7420461P10Rik	P1P2	7420461P10Rik_+_162658299.23-P1P2	GTGCAACTGGTAGACTCCAT	1	7420461P10Rik_-_162658438.23-P1P2	GAGACCATGGGGAACTGGCC	2	7420461P10Rik_+_162658299.23-P1P2|7420461P10Rik_-_162658438.23-P1P2
Fam222b	P1P2	Fam222b_-_78094624.23-P1P2	GTCCCCGGAGCGAGGTGCGC	1	Fam222b_-_78094659.23-P1P2	GAGAGGGCCCCGGGCAATCC	2	Fam222b_-_78094624.23-P1P2|Fam222b_-_78094659.23-P1P2
Spink3	P1P2	Spink3_-_43737326.23-P1P2	GGCTGGGGAAAATGTAACCT	1	Spink3_-_43737330.23-P1P2	GGGGAAAATGTAACCTAGGT	2	Spink3_-_43737326.23-P1P2|Spink3_-_43737330.23-P1P2
Wdr17	P1P2	Wdr17_+_54724494.23-P1P2	GGTCACGTGCAATTCTGGGG	1	Wdr17_-_54724569.23-P1P2	GACAGGGAGGCGGAAGTCCC	2	Wdr17_+_54724494.23-P1P2|Wdr17_-_54724569.23-P1P2
Tm9sf4	P1P2	Tm9sf4_+_153161360.23-P1P2	GACTAGGTGAAGAGAACGTA	1	Tm9sf4_-_153161345.23-P1P2	GGGTCTGCCAGAAGTCAATA	2	Tm9sf4_+_153161360.23-P1P2|Tm9sf4_-_153161345.23-P1P2
Sebox	P1P2	Sebox_+_78503377.23-P1P2	GAGGAAACATGGCAGGACTG	1	Sebox_+_78503396.23-P1P2	GTCAAGAGAGGTTGAGAAGT	2	Sebox_+_78503377.23-P1P2|Sebox_+_78503396.23-P1P2
Lipe	P2	Lipe_+_25395704.23-P2	GGAGCCTGCCCAGGATTGGA	1	Lipe_-_25395755.23-P2	GGCTCCGCCTTTAATGGGTG	2	Lipe_+_25395704.23-P2|Lipe_-_25395755.23-P2
Gnb1	P1P2	Gnb1_-_155491202.23-P1P2	GTCCCTGGAAGACCCTTGCG	1	Gnb1_+_155491182.23-P1P2	GACCCCGCAAGGGTCTTCCA	2	Gnb1_-_155491202.23-P1P2|Gnb1_+_155491182.23-P1P2
Tmem19	P1P2	Tmem19_-_115362420.23-P1P2	GTGCCCGGGCAAGCGAACCA	1	Tmem19_+_115362453.23-P1P2	GACTCCCGGGGCAGCGGGGT	2	Tmem19_-_115362420.23-P1P2|Tmem19_+_115362453.23-P1P2
Nme2	P1P2	Nme2_+_93956083.23-P1P2	GAAGAACAGGCGGACTTGGG	1	Nme2_+_93956031.23-P1P2	GCCGCAGCCCTGCAAGGAGA	2	Nme2_+_93956083.23-P1P2|Nme2_+_93956031.23-P1P2
Exosc1	P1P2	Exosc1_-_41933448.23-P1P2	GTGCCCCGGGACAGATCTCT	1	Exosc1_+_41933560.23-P1P2	GCCCAGGCCGGGCCGAGCTA	2	Exosc1_-_41933448.23-P1P2|Exosc1_+_41933560.23-P1P2
Olfr1205	ENSMUST00000076438.1	Olfr1205_-_88831001.23-ENSMUST00000076438.1	GAAGCCTAGACAATGGTAAG	1	Olfr1205_-_88831012.23-ENSMUST00000076438.1	GATGGTAAGTGGTAACTCAC	2	Olfr1205_-_88831001.23-ENSMUST00000076438.1|Olfr1205_-_88831012.23-ENSMUST00000076438.1
Rab3a	P2	Rab3a_-_70756354.23-P2	GTTTCCTGACCCACTGTCCC	1	Rab3a_+_70756184.23-P2	GAAAACGGGAAGCTCATACT	2	Rab3a_-_70756354.23-P2|Rab3a_+_70756184.23-P2
Olfr605	ENSMUST00000080660.3	Olfr605_+_103443283.23-ENSMUST00000080660.3	GTGTCATAAACCACAGTTTG	1	Olfr605_+_103443668.23-ENSMUST00000080660.3	GgagggggGAGATAATGCTT	2	Olfr605_+_103443283.23-ENSMUST00000080660.3|Olfr605_+_103443668.23-ENSMUST00000080660.3
1110057K04Rik	P1P2	1110057K04Rik_-_8207967.23-P1P2	GAGAGCGGGTAAAATTCAGG	1	1110057K04Rik_-_8207881.23-P1P2	GGAAAAGTGGGCAGATGGGG	2	1110057K04Rik_-_8207967.23-P1P2|1110057K04Rik_-_8207881.23-P1P2
Mri1	P1P2	Mri1_+_84257455.23-P1P2	GTCATCGCTTCAGTAACGGA	1	Mri1_+_84257444.23-P1P2	GGTAACGGATGGACGATTTC	2	Mri1_+_84257455.23-P1P2|Mri1_+_84257444.23-P1P2
BC055111	P1P2	BC055111_+_106617260.23-P1P2	GTGGCAGCGCGCGGTGTCAA	1	BC055111_+_106617437.23-P1P2	GAAACCCCAGGGGGATCCTA	2	BC055111_+_106617260.23-P1P2|BC055111_+_106617437.23-P1P2
Syndig1	P1P2	Syndig1_-_149830682.23-P1P2	GAGAGGACCGGGTTCTGGAA	1	Syndig1_-_149830671.23-P1P2	GCCTAGGGGCCAAGAGGACC	2	Syndig1_-_149830682.23-P1P2|Syndig1_-_149830671.23-P1P2
Xlr4c	P1P2	Xlr4c_+_73243082.23-P1P2	GCAAGTAGGGGCTTTTTCCT	1	Xlr4c_+_73243387.23-P1P2	GAGGAAGTGTGGTTTAAAGG	2	Xlr4c_+_73243082.23-P1P2|Xlr4c_+_73243387.23-P1P2
Tmem127	P1P2	Tmem127_-_127247832.23-P1P2	GGAAGCCTCGCGGGACAGTC	1	Tmem127_+_127247799.23-P1P2	GGCGAGGCTTCCAGTTACGG	2	Tmem127_-_127247832.23-P1P2|Tmem127_+_127247799.23-P1P2
Olfr1279	ENSMUST00000090329.1	Olfr1279_+_111305965.23-ENSMUST00000090329.1	GACATGACTATGGTAGAGAG	1	Olfr1279_-_111305858.23-ENSMUST00000090329.1	GTCTGTCACCTGGACTGATA	2	Olfr1279_+_111305965.23-ENSMUST00000090329.1|Olfr1279_-_111305858.23-ENSMUST00000090329.1
Svs4	P1P2	Svs4_+_164278411.23-P1P2	GAATACCCCCTGCATAGCAC	1	Svs4_+_164278489.23-P1P2	GAAGATTGGCTGGAAGTTGG	2	Svs4_+_164278411.23-P1P2|Svs4_+_164278489.23-P1P2
Rspo1	P1P2	Rspo1_-_124986281.23-P1P2	GCGGGTGCGGGTCGGAGAAA	1	Rspo1_-_124986268.23-P1P2	GAACCCAAGAAAAGCGGGTG	2	Rspo1_-_124986281.23-P1P2|Rspo1_-_124986268.23-P1P2
Tmem231	P1P2	Tmem231_-_111933924.23-P1P2	GTTCAAGAAGGCAACTGTAT	1	Tmem231_-_111933850.23-P1P2	GGGCATGCAGGCCTCTAGAA	2	Tmem231_-_111933924.23-P1P2|Tmem231_-_111933850.23-P1P2
Rhox1	ENSMUST00000115210.1	Rhox1_-_37222785.23-ENSMUST00000115210.1	Ggactaagacagtttattga	1	Rhox1_+_37222346.23-ENSMUST00000115210.1	Gaactatcagagatctgaca	2	Rhox1_-_37222785.23-ENSMUST00000115210.1|Rhox1_+_37222346.23-ENSMUST00000115210.1
Ak5	P1P2	Ak5_+_152668182.23-P1P2	GcccgcccgcgcAGCGTGAC	1	Ak5_-_152668178.23-P1P2	GCCTCCGGAGCTCGCTGCGG	2	Ak5_+_152668182.23-P1P2|Ak5_-_152668178.23-P1P2
Apcs	P1P2	Apcs_-_172895002.23-P1P2	GTACCTTGGATGACAATGAA	1	Apcs_+_172895042.23-P1P2	GCTAATTATTAGCAGAACGA	2	Apcs_-_172895002.23-P1P2|Apcs_+_172895042.23-P1P2
Relt	P1P2	Relt_+_100863567.23-P1P2	GAGCCCCTGCAGTTCCTAGG	1	Relt_+_100863528.23-P1P2	GCGGAGCAGCGTGGCCTGGC	2	Relt_+_100863567.23-P1P2|Relt_+_100863528.23-P1P2
Orc1	P1P2	Orc1_+_108579314.23-P1P2	GAATTTGCTTGGGCCCTCTC	1	Orc1_-_108579323.23-P1P2	GGCACACCCCGCACCAGAGA	2	Orc1_+_108579314.23-P1P2|Orc1_-_108579323.23-P1P2
Robo1	P1P2	Robo1_-_72663071.23-P1P2	GAGCAGCGCCAGTGAGGGCC	1	Robo1_+_72663087.23-P1P2	GCGGCTCGGGAACCTTTAAA	2	Robo1_-_72663071.23-P1P2|Robo1_+_72663087.23-P1P2
Uqcr11	P1P2	Uqcr11_-_80406984.23-P1P2	GCACACTGGAACACCGGGGA	1	Uqcr11_-_80407155.23-P1P2	Gtgtaagcctggggtagaca	2	Uqcr11_-_80406984.23-P1P2|Uqcr11_-_80407155.23-P1P2
Rbm27	P1P2	Rbm27_+_42275199.23-P1P2	GCGGAGGGACCTAGCAAGGT	1	Rbm27_+_42275218.23-P1P2	GAAGCCGTACCCAGTGAGGG	2	Rbm27_+_42275199.23-P1P2|Rbm27_+_42275218.23-P1P2
Arc	P1P2	Arc_+_74672753.23-P1P2	GAGTCACTCGGGGCTGTGAA	1	Arc_+_74672724.23-P1P2	GCTTGAGGGCACCCACGGGA	2	Arc_+_74672753.23-P1P2|Arc_+_74672724.23-P1P2
Defb9	P1P2	Defb9_+_21885683.23-P1P2	Ggaatgcctgggtgaagaag	1	Defb9_-_21885480.23-P1P2	GTGAGGGTTGCCTGCAGCTG	2	Defb9_+_21885683.23-P1P2|Defb9_-_21885480.23-P1P2
Arid1b	P2	Arid1b_+_4994178.23-P2	GGCCCGGCCCGGGGGAGCGA	1	Arid1b_-_4994240.23-P2	GGAGACCAGCCGGGTGAGCG	2	Arid1b_+_4994178.23-P2|Arid1b_-_4994240.23-P2
Zfy1	ENSMUST00000065545.4	Zfy1_-_797550.23-ENSMUST00000065545.4	GTCAAATGCAGGGCAGGAGC	1	Zfy1_+_797436.23-ENSMUST00000065545.4	GgtggcgtgCTGCGTGTCAG	2	Zfy1_-_797550.23-ENSMUST00000065545.4|Zfy1_+_797436.23-ENSMUST00000065545.4
Il1f8	P1P2	Il1f8_+_24153023.23-P1P2	GGGTAGGGAGCCACACATAT	1	Il1f8_+_24153056.23-P1P2	GGGGACCCGGAAGGTGGTGG	2	Il1f8_+_24153023.23-P1P2|Il1f8_+_24153056.23-P1P2
Rpl37a	P1P2	Rpl37a_+_72710899.23-P1P2	GCCCAGGCCGAGTTACAGTT	1	Rpl37a_-_72710914.23-P1P2	GTCCCAGCCGAACTGTAACT	2	Rpl37a_+_72710899.23-P1P2|Rpl37a_-_72710914.23-P1P2
Vmn1r203	ENSMUST00000091729.1	Vmn1r203_-_22524021.23-ENSMUST00000091729.1	GCCCACGTCTACAATTGAAG	1	Vmn1r203_-_22523905.23-ENSMUST00000091729.1	GCCTTGAAGCCACAGGAAGA	2	Vmn1r203_-_22524021.23-ENSMUST00000091729.1|Vmn1r203_-_22523905.23-ENSMUST00000091729.1
Fam178a	P1P2	Fam178a_-_44930988.23-P1P2	GCACGTGACGGGCCCGGGGA	1	Fam178a_-_44930977.23-P1P2	GCGCCCCAGGCGCACGTGAC	2	Fam178a_-_44930988.23-P1P2|Fam178a_-_44930977.23-P1P2
Edem3	P1P2	Edem3_-_151755164.23-P1P2	GGGGTCGGAGGTGGATCGAA	1	Edem3_-_151755152.23-P1P2	GTGGCAACTCCTGGGGTCGG	2	Edem3_-_151755164.23-P1P2|Edem3_-_151755152.23-P1P2
Gip	P1P2	Gip_+_96024389.23-P1P2	GTGCTCCTGGGCTGTGCTAA	1	Gip_-_96024303.23-P1P2	GAACAGCAGGCCCTGTGCCC	2	Gip_+_96024389.23-P1P2|Gip_-_96024303.23-P1P2
Tle1	P1P2	Tle1_+_72201070.23-P1P2	GAGGAGGGGCCCAGGCGAGT	1	Tle1_+_72201035.23-P1P2	GCACAGAGGCCGCGCGAGGT	2	Tle1_+_72201070.23-P1P2|Tle1_+_72201035.23-P1P2
Olfr102	ENSMUST00000169373.1	Olfr102_+_37314902.23-ENSMUST00000169373.1	GGGAGGAGATAAGGTCAAAA	1	Olfr102_+_37314531.23-ENSMUST00000169373.1	GTTGTTACTTAACATAATAA	2	Olfr102_+_37314902.23-ENSMUST00000169373.1|Olfr102_+_37314531.23-ENSMUST00000169373.1
5430402E10Rik	ENSMUST00000063127.3	5430402E10Rik_+_77925544.23-ENSMUST00000063127.3	GTGCAAATTCCTGCCCAGAA	1	5430402E10Rik_+_77925519.23-ENSMUST00000063127.3	GATAGTACACTTCTTCACAA	2	5430402E10Rik_+_77925544.23-ENSMUST00000063127.3|5430402E10Rik_+_77925519.23-ENSMUST00000063127.3
Olfr483	ENSMUST00000104917.1	Olfr483_-_108102973.23-ENSMUST00000104917.1	GAAAACATCCATTGCTagct	1	Olfr483_+_108102959.23-ENSMUST00000104917.1	GcaccacgcccagctAGCAA	2	Olfr483_-_108102973.23-ENSMUST00000104917.1|Olfr483_+_108102959.23-ENSMUST00000104917.1
Gm4791	ENSMUST00000178065.1	Gm4791_+_46998724.23-ENSMUST00000178065.1	GTCGGGTGAAATATGAGATG	1	Gm4791_-_46998783.23-ENSMUST00000178065.1	GGAAGACATTGGTTGTGTTG	2	Gm4791_+_46998724.23-ENSMUST00000178065.1|Gm4791_-_46998783.23-ENSMUST00000178065.1
Gm410	P1P2	Gm410_-_57692772.23-P1P2	GAAAGAACCCATCAGAATAC	1	Gm410_+_57692675.23-P1P2	GCCAAAGTGTCACTTGTGTG	2	Gm410_-_57692772.23-P1P2|Gm410_+_57692675.23-P1P2
Olfr316	ENSMUST00000073005.2	Olfr316_-_58757213.23-ENSMUST00000073005.2	GAGGAAGAGAATCTACTGGT	1	Olfr316_+_58757387.23-ENSMUST00000073005.2	GTAGAGTACATGTATTAAAC	2	Olfr316_-_58757213.23-ENSMUST00000073005.2|Olfr316_+_58757387.23-ENSMUST00000073005.2
Rbpms	P1P2	Rbpms_-_33929991.23-P1P2	GAAGCCCCCCGCGAGAGGAG	1	Rbpms_-_33930017.23-P1P2	GGGGCGGAGCGGTCGAACCC	2	Rbpms_-_33929991.23-P1P2|Rbpms_-_33930017.23-P1P2
Gm13305	ENSMUST00000098121.3	Gm13305_+_42168686.23-ENSMUST00000098121.3	GAGGACACGGCCCCCTCCCC	1	Gm13305_+_42169126.23-ENSMUST00000098121.3	GCGAAGGCCCACGAACCCCC	2	Gm13305_+_42168686.23-ENSMUST00000098121.3|Gm13305_+_42169126.23-ENSMUST00000098121.3
Ces1f	P1P2	Ces1f_-_93279767.23-P1P2	GCACAAGGAAGGGGTGTGTA	1	Ces1f_+_93279898.23-P1P2	GCTTGGAAGAGCTGTGGCTA	2	Ces1f_-_93279767.23-P1P2|Ces1f_+_93279898.23-P1P2
Rabggta	P1P2	Rabggta_-_55722369.23-P1P2	GGCCTtgaagggactggtat	1	Rabggta_-_55722375.23-P1P2	Gaagggactggtatcggctc	2	Rabggta_-_55722369.23-P1P2|Rabggta_-_55722375.23-P1P2
Nsun2	P1P2	Nsun2_+_69611723.23-P1P2	GGGCGTGGTTGCAAGTTAGG	1	Nsun2_+_69611921.23-P1P2	GGAGAACTCACGCAAAAAAA	2	Nsun2_+_69611723.23-P1P2|Nsun2_+_69611921.23-P1P2
Olfr676	ENSMUST00000098162.1	Olfr676_-_105035068.23-ENSMUST00000098162.1	GCACTCAGAGTTAAAGAAAA	1	Olfr676_+_105034958.23-ENSMUST00000098162.1	GCTAGTGTTCACAGTAAGGA	2	Olfr676_-_105035068.23-ENSMUST00000098162.1|Olfr676_+_105034958.23-ENSMUST00000098162.1
F830016B08Rik	P1P2	F830016B08Rik_-_60292918.23-P1P2	GgagttgAAAACAATAATTA	1	F830016B08Rik_+_60292871.23-P1P2	Ggtcctgttgggatttgttc	2	F830016B08Rik_-_60292918.23-P1P2|F830016B08Rik_+_60292871.23-P1P2
Thsd7a	P1P2	Thsd7a_-_12749362.23-P1P2	GGACCCGAGGGGACCACCGG	1	Thsd7a_-_12749351.23-P1P2	GAGAGCCAAGGGGACCCGAG	2	Thsd7a_-_12749362.23-P1P2|Thsd7a_-_12749351.23-P1P2
Kctd11	P1P2	Kctd11_-_69881072.23-P1P2	GGGCTGGCCGGGCTCTGCTA	1	Kctd11_+_69881018.23-P1P2	GAGGGCGGGGCGCTAAGGGG	2	Kctd11_-_69881072.23-P1P2|Kctd11_+_69881018.23-P1P2
4931429L15Rik	P1P2	4931429L15Rik_+_46316185.23-P1P2	GCCCAAGTTGGGTGCCTCAC	1	4931429L15Rik_+_46316113.23-P1P2	GCACGTGTCCCCTAAGTTAG	2	4931429L15Rik_+_46316185.23-P1P2|4931429L15Rik_+_46316113.23-P1P2
Myzap	P1P2	Myzap_+_71592483.23-P1P2	GTGGACAGGGAGATACAGAG	1	Myzap_+_71592497.23-P1P2	GGTGTGCAGGAAGACTGGAC	2	Myzap_+_71592483.23-P1P2|Myzap_+_71592497.23-P1P2
Sbk1	P1P2	Sbk1_+_126272415.23-P1P2	Gccctcccgccaggcgccac	1	Sbk1_-_126272400.23-P1P2	GCATCGTGCGGCTCCCGCGG	2	Sbk1_+_126272415.23-P1P2|Sbk1_-_126272400.23-P1P2
Fau	P1P2	Fau_-_6057841.23-P1P2	GCGCCTGCGTACAGCGTAAG	1	Fau_+_6057871.23-P1P2	GCGACCGCGCGGATCGCTGG	2	Fau_-_6057841.23-P1P2|Fau_+_6057871.23-P1P2
Sh3rf1	P1P2	Sh3rf1_+_61224086.23-P1P2	GCGGGCGCCCGGGGACCGGA	1	Sh3rf1_-_61224093.23-P1P2	GGCGCTGTGGTGCGTCCCTC	2	Sh3rf1_+_61224086.23-P1P2|Sh3rf1_-_61224093.23-P1P2
Slc22a18	P1	Slc22a18_-_143473679.23-P1	GGAGGTGATCCCAGGTTCTA	1	Slc22a18_+_143473580.23-P1	GCTGCCAAGGGGACCAACCC	2	Slc22a18_-_143473679.23-P1|Slc22a18_+_143473580.23-P1
Tas2r102	ENSMUST00000069268.2	Tas2r102_-_132761960.23-ENSMUST00000069268.2	GAATATTTAGGATATGGTAA	1	Tas2r102_+_132761823.23-ENSMUST00000069268.2	GAGTTTAAGGAAATTTGGTT	2	Tas2r102_-_132761960.23-ENSMUST00000069268.2|Tas2r102_+_132761823.23-ENSMUST00000069268.2
Myoz1	P1P2	Myoz1_-_20656650.23-P1P2	GAGCCTGCCCTCTTTGCCTG	1	Myoz1_+_20656684.23-P1P2	GCTGGCTCAGACAGTCTGGT	2	Myoz1_-_20656650.23-P1P2|Myoz1_+_20656684.23-P1P2
H2-Q6	P1P2	H2-Q6_-_35424358.23-P1P2	GTCTCTATGGAGTCCATGTG	1	H2-Q6_+_35424332.23-P1P2	GCATGGACTCCATAGAGACC	2	H2-Q6_-_35424358.23-P1P2|H2-Q6_+_35424332.23-P1P2
Eaf1	P1P2	Eaf1_+_31494816.23-P1P2	GTGGACGCGAGTTTGAATGT	1	Eaf1_-_31494806.23-P1P2	GAGGGTCTCGGGCATGTCCA	2	Eaf1_+_31494816.23-P1P2|Eaf1_-_31494806.23-P1P2
Prelid2	P1P2	Prelid2_+_41951438.23-P1P2	GGTTGCAGGGTGTAACTGGG	1	Prelid2_-_41951406.23-P1P2	GTACGCCCACGTCCCCTCCC	2	Prelid2_+_41951438.23-P1P2|Prelid2_-_41951406.23-P1P2
Tnfrsf4	P1P2	Tnfrsf4_+_156013782.23-P1P2	GGAGGTGGGGCAAGAAGAGT	1	Tnfrsf4_+_156013670.23-P1P2	GCGCTGGGGAACGTGAAGAG	2	Tnfrsf4_+_156013782.23-P1P2|Tnfrsf4_+_156013670.23-P1P2
Fbln1	P1P2	Fbln1_+_85205928.23-P1P2	GGCCACCCAGACTCTCCTGC	1	Fbln1_-_85205945.23-P1P2	GCATCCCCGCAGGAGAGTCT	2	Fbln1_+_85205928.23-P1P2|Fbln1_-_85205945.23-P1P2
Olfr996	ENSMUST00000077075.2	Olfr996_-_85578936.23-ENSMUST00000077075.2	Gtcccacagatcaaaagtgg	1	Olfr996_-_85578990.23-ENSMUST00000077075.2	Gaaagattgcagttgccaaa	2	Olfr996_-_85578936.23-ENSMUST00000077075.2|Olfr996_-_85578990.23-ENSMUST00000077075.2
Dnmt3a	P1	Dnmt3a_-_3806770.23-P1	GGGGGCGCTAGGACCGTCCG	1	Dnmt3a_-_3806962.23-P1	Ggggggggacccggcggagg	2	Dnmt3a_-_3806770.23-P1|Dnmt3a_-_3806962.23-P1
Krt28	P1P2	Krt28_+_99375051.23-P1P2	GATCCTGAAGCGATGAGGGG	1	Krt28_-_99375222.23-P1P2	GGGGGCTAATCCAGTGTCAA	2	Krt28_+_99375051.23-P1P2|Krt28_-_99375222.23-P1P2
Armc6	P1P2	Armc6_-_70234598.23-P1P2	GTCGCCAGGCGGTGGATAAG	1	Armc6_-_70234556.23-P1P2	GGCGGCGCTGCGGAAACCGT	2	Armc6_-_70234598.23-P1P2|Armc6_-_70234556.23-P1P2
Gatad2b	ENSMUST00000049382.4	Gatad2b_-_90341450.23-ENSMUST00000049382.4	GTAAAGGCCTTTGGAGACTA	1	Gatad2b_+_90341384.23-ENSMUST00000049382.4	GAACACTAAACTCTTGTGAA	2	Gatad2b_-_90341450.23-ENSMUST00000049382.4|Gatad2b_+_90341384.23-ENSMUST00000049382.4
Plag1	P1P2	Plag1_+_3938421.23-P1P2	Ggcggtgggcgcgacgtcgg	1	Plag1_+_3938720.23-P1P2	GAGGGCTCAAGCAGGAGGAG	2	Plag1_+_3938421.23-P1P2|Plag1_+_3938720.23-P1P2
Igsf5	P1P2	Igsf5_-_96361561.23-P1P2	GCTGGAAAAAGGCTCGGCGG	1	Igsf5_-_96361499.23-P1P2	GAGACTCTGGCTGGTGGCGA	2	Igsf5_-_96361561.23-P1P2|Igsf5_-_96361499.23-P1P2
Med27	P1P2	Med27_-_29346652.23-P1P2	GACAAAATGACTTCCCTAGA	1	Med27_+_29346705.23-P1P2	GCAGGAAGCTCTAGCGAACT	2	Med27_-_29346652.23-P1P2|Med27_+_29346705.23-P1P2
Baz1b	P1P2	Baz1b_-_135187138.23-P1P2	GGCGCTGCAACTCAACTTCG	1	Baz1b_+_135187145.23-P1P2	GAGGTCGAGTCCCGCCCCCT	2	Baz1b_-_135187138.23-P1P2|Baz1b_+_135187145.23-P1P2
Prune	P1P2	Prune_-_95281876.23-P1P2	GGGGACGTCAAGGAGGAGTA	1	Prune_-_95281869.23-P1P2	GGACTCATGGGACGTCAAGG	2	Prune_-_95281876.23-P1P2|Prune_-_95281869.23-P1P2
Akr1cl	P1P2	Akr1cl_+_65033052.23-P1P2	Gtcagactctacttgatcat	1	Akr1cl_-_65033031.23-P1P2	Gccccagctccactagggct	2	Akr1cl_+_65033052.23-P1P2|Akr1cl_-_65033031.23-P1P2
Cryga	P1P2	Cryga_-_65103496.23-P1P2	GTCCTCGCGCTTTGTCATTT	1	Cryga_+_65103618.23-P1P2	GCATTTCGAGCGCGCTGCAT	2	Cryga_-_65103496.23-P1P2|Cryga_+_65103618.23-P1P2
Pde1a	ENSMUST00000102655.3,ENSMUST00000102654.4	Pde1a_-_80129137.23-ENSMUST00000102655.3,ENSMUST00000102654.4	GTACTACTGACCGACTGCTC	1	Pde1a_+_80129094.23-ENSMUST00000102655.3,ENSMUST00000102654.4	GCAGTAGCAGCTCACATGTG	2	Pde1a_-_80129137.23-ENSMUST00000102655.3,ENSMUST00000102654.4|Pde1a_+_80129094.23-ENSMUST00000102655.3,ENSMUST00000102654.4
Usb1	P1P2	Usb1_-_95332147.23-P1P2	GGGAACCCACACTGGGGCGA	1	Usb1_-_95332140.23-P1P2	GGACCTGTGGAACCCACACT	2	Usb1_-_95332147.23-P1P2|Usb1_-_95332140.23-P1P2
Asb4	P1P2	Asb4_+_5390396.23-P1P2	GTAAACTGGAGATACGTAAG	1	Asb4_+_5390376.23-P1P2	GGGGTCCCTTCCGCTCTACG	2	Asb4_+_5390396.23-P1P2|Asb4_+_5390376.23-P1P2
Lrrc48	P1P2	Lrrc48_-_60353040.23-P1P2	GCCACCCCGCGGCGTCCGAT	1	Lrrc48_-_60353096.23-P1P2	GAGCCTAGCGGCACAACCCC	2	Lrrc48_-_60353040.23-P1P2|Lrrc48_-_60353096.23-P1P2
Rtfdc1	P1P2	Rtfdc1_-_172440433.23-P1P2	GCGGAAGTGGACGCACTCCA	1	Rtfdc1_-_172440474.23-P1P2	GTGAAACCACGCCCAACTCC	2	Rtfdc1_-_172440433.23-P1P2|Rtfdc1_-_172440474.23-P1P2
Arhgap17	P1P2	Arhgap17_-_123370063.23-P1P2	GGGCGGAGTTAAGTGGTTCA	1	Arhgap17_-_123370046.23-P1P2	GCGGACGGACCCAACATGGG	2	Arhgap17_-_123370063.23-P1P2|Arhgap17_-_123370046.23-P1P2
Nfe2	P1P2	Nfe2_+_103255326.23-P1P2	GGGTGCGCCCGCTTCTACCG	1	Nfe2_+_103255364.23-P1P2	GCACTGGTAACTCCGACCGA	2	Nfe2_+_103255326.23-P1P2|Nfe2_+_103255364.23-P1P2
Slitrk4	P1P2	Slitrk4_+_64277120.23-P1P2	GCGTCTGCTGGAGGGTCAAG	1	Slitrk4_+_64277078.23-P1P2	GGAAGTGATCGGTGTCCGGA	2	Slitrk4_+_64277120.23-P1P2|Slitrk4_+_64277078.23-P1P2
Olfr1497	ENSMUST00000061993.2	Olfr1497_-_13795820.23-ENSMUST00000061993.2	GAGTTCTATTATAGGAGGCA	1	Olfr1497_+_13795956.23-ENSMUST00000061993.2	GgacaggaacaattAATCAG	2	Olfr1497_-_13795820.23-ENSMUST00000061993.2|Olfr1497_+_13795956.23-ENSMUST00000061993.2
C530008M17Rik	ENSMUST00000120639.2,ENSMUST00000163347.1	C530008M17Rik_+_76840373.23-ENSMUST00000120639.2,ENSMUST00000163347.1	GAAGTGGCACAGATCTAAAC	1	C530008M17Rik_+_76840272.23-ENSMUST00000120639.2,ENSMUST00000163347.1	GAATACACCCGGGGCGTGGG	2	C530008M17Rik_+_76840373.23-ENSMUST00000120639.2,ENSMUST00000163347.1|C530008M17Rik_+_76840272.23-ENSMUST00000120639.2,ENSMUST00000163347.1
Xkr7	P1P2	Xkr7_+_153031756.23-P1P2	GCACCCTCGCATGGCTTCCT	1	Xkr7_+_153031809.23-P1P2	GGTGGGCCGCCCCCTGGGAA	2	Xkr7_+_153031756.23-P1P2|Xkr7_+_153031809.23-P1P2
Cdc27	P1P2	Cdc27_-_104550624.23-P1P2	GAAGAGCCGAGGTGAGTCGG	1	Cdc27_-_104550621.23-P1P2	GGGAAAGAGCCGAGGTGAGT	2	Cdc27_-_104550624.23-P1P2|Cdc27_-_104550621.23-P1P2
Sirpa	P1P2	Sirpa_-_129592759.23-P1P2	GCCACCCGGAGGCCGACCTT	1	Sirpa_+_129592550.23-P1P2	GAGGAGCAGCAAAAATGCTG	2	Sirpa_-_129592759.23-P1P2|Sirpa_+_129592550.23-P1P2
Rnf213	P1P2	Rnf213_+_119392797.23-P1P2	GGAAGCTCAAAAGTAGAGGG	1	Rnf213_+_119392970.23-P1P2	GTCAAGGAAAACGAAGTGAT	2	Rnf213_+_119392797.23-P1P2|Rnf213_+_119392970.23-P1P2
Trio	P1P2	Trio_-_28026073.23-P1P2	GCCCGGAGGGCGAAATGGAG	1	Trio_-_28026018.23-P1P2	GGGTGGGCGGGGCCTTTTGT	2	Trio_-_28026073.23-P1P2|Trio_-_28026018.23-P1P2
Coro2a	P1P2	Coro2a_+_46602097.23-P1P2	GACAGTCTCCATCTCAGCAA	1	Coro2a_+_46602038.23-P1P2	GTGCGGCGAGAGCGTGTCGG	2	Coro2a_+_46602097.23-P1P2|Coro2a_+_46602038.23-P1P2
Map3k9	P1P2	Map3k9_+_81781290.23-P1P2	GGGCGGGCCAATGGGAGGAT	1	Map3k9_+_81781286.23-P1P2	GGGCCAATGGGAGGATGGGT	2	Map3k9_+_81781290.23-P1P2|Map3k9_+_81781286.23-P1P2
Lmtk3	P2	Lmtk3_+_45783753.23-P2	GAATGGGATTGCAGTGACCG	1	Lmtk3_+_45783834.23-P2	GAGGAGGGGAAGCCTCGCGG	2	Lmtk3_+_45783753.23-P2|Lmtk3_+_45783834.23-P2
Glb1	P1P2	Glb1_-_114400999.23-P1P2	GCGGAAGGAAACACAGTTGT	1	Glb1_+_114400919.23-P1P2	GAGGGGCTGGCCATTCACAG	2	Glb1_-_114400999.23-P1P2|Glb1_+_114400919.23-P1P2
Hirip3	P1P2	Hirip3_+_126862344.23-P1P2	GCGGCGGCTTCGTGAGGAAT	1	Hirip3_-_126861950.23-P1P2	GACACCGCCCGCCCTCCTGG	2	Hirip3_+_126862344.23-P1P2|Hirip3_-_126861950.23-P1P2
Rhox7	ENSMUST00000096454.1	Rhox7_+_37831579.23-ENSMUST00000096454.1	GAGCAGCAGTGGGACCAGGT	1	Rhox7_+_37831583.23-ENSMUST00000096454.1	GGAGGAGCAGCAGTGGGACC	2	Rhox7_+_37831579.23-ENSMUST00000096454.1|Rhox7_+_37831583.23-ENSMUST00000096454.1
Gpr124	P1P2	Gpr124_-_27085494.23-P1P2	GAGGGCCTCGCAGAGTGACG	1	Gpr124_-_27085424.23-P1P2	GTCTGCTCAAGCTGTCTTCT	2	Gpr124_-_27085494.23-P1P2|Gpr124_-_27085424.23-P1P2
Nasp	P1P2	Nasp_+_116627632.23-P1P2	GGGGCGGGAAGATACCCAAA	1	Nasp_+_116627627.23-P1P2	GGGAAGATACCCAAACGGGA	2	Nasp_+_116627632.23-P1P2|Nasp_+_116627627.23-P1P2
Tmem177	P1P2	Tmem177_+_119913371.23-P1P2	GGGCCAGCAGGTCTCTATCT	1	Tmem177_-_119913245.23-P1P2	GTGGGCGGAACGGGCGTTGT	2	Tmem177_+_119913371.23-P1P2|Tmem177_-_119913245.23-P1P2
H60b	P1	H60b_+_22158481.23-P1	GTGGCTGGAGAACCACCCGG	1	H60b_-_22158462.23-P1	GCGGCCTCGCTTGCTTCCGA	2	H60b_+_22158481.23-P1|H60b_-_22158462.23-P1
Irx1	P1P2	Irx1_+_71963829.23-P1P2	Gcgggagcggccagcgaggg	1	Irx1_+_71963967.23-P1P2	GAGGTTGTCAAAAGCCGCGG	2	Irx1_+_71963829.23-P1P2|Irx1_+_71963967.23-P1P2
Ankrd55	P1P2	Ankrd55_+_112288429.23-P1P2	GCGTGCTGGCTGTTTGTTCT	1	Ankrd55_+_112288232.23-P1P2	GTCAGAGAGACTTTGAGGGT	2	Ankrd55_+_112288429.23-P1P2|Ankrd55_+_112288232.23-P1P2
Tbc1d25	P1P2	Tbc1d25_-_8176110.23-P1P2	GTCCTGCCTGGCCCGGTCCG	1	Tbc1d25_-_8176045.23-P1P2	GGGAACCCCGCCTCCCAGAG	2	Tbc1d25_-_8176110.23-P1P2|Tbc1d25_-_8176045.23-P1P2
Nup155	P1P2	Nup155_+_8109178.23-P1P2	GTTGGAGATGGCCTAgggaa	1	Nup155_+_8109226.23-P1P2	GGAGTGTCGGACATTGGCGA	2	Nup155_+_8109178.23-P1P2|Nup155_+_8109226.23-P1P2
Samm50	P1P2	Samm50_+_84192076.23-P1P2	GTGGTCCCGTGAAAAGGCAA	1	Samm50_-_84192155.23-P1P2	GAACGCTCCACGCTTGCACT	2	Samm50_+_84192076.23-P1P2|Samm50_-_84192155.23-P1P2
Ifna2	ENSMUST00000105147.1	Ifna2_-_88683995.23-ENSMUST00000105147.1	GTTTCCCCCCTCACGCATGT	1	Ifna2_-_88684291.23-ENSMUST00000105147.1	GTATTGTTGTGGCctggaca	2	Ifna2_-_88683995.23-ENSMUST00000105147.1|Ifna2_-_88684291.23-ENSMUST00000105147.1
Csrnp1	P1P2	Csrnp1_-_119984833.23-P1P2	GCCCTCCCCCGGGTGTAGTA	1	Csrnp1_-_119984874.23-P1P2	GCTAAATGGCACCGAGGGTG	2	Csrnp1_-_119984833.23-P1P2|Csrnp1_-_119984874.23-P1P2
Olfr74	ENSMUST00000099840.1	Olfr74_+_87974796.23-ENSMUST00000099840.1	GATCGCCTATAGTCTGTCTG	1	Olfr74_-_87974813.23-ENSMUST00000099840.1	GGATTCCTCAGACAGACTAT	2	Olfr74_+_87974796.23-ENSMUST00000099840.1|Olfr74_-_87974813.23-ENSMUST00000099840.1
Ndufb6	P1P2	Ndufb6_-_40279512.23-P1P2	GCATGCGCAAAGCCCTCTCT	1	Ndufb6_-_40279659.23-P1P2	GGGAGGGGACCGGAAGAACA	2	Ndufb6_-_40279512.23-P1P2|Ndufb6_-_40279659.23-P1P2
4930432M17Rik	ENSMUST00000098646.3	4930432M17Rik_+_121671204.23-ENSMUST00000098646.3	Ggtgccacctaccttctggg	1	4930432M17Rik_+_121671064.23-ENSMUST00000098646.3	GCCCGTGTTGGTGAGACTCA	2	4930432M17Rik_+_121671204.23-ENSMUST00000098646.3|4930432M17Rik_+_121671064.23-ENSMUST00000098646.3
Kcnma1	ENSMUST00000172099.2,ENSMUST00000074983.6	Kcnma1_-_23803449.23-ENSMUST00000172099.2,ENSMUST00000074983.6	GGGGGAAGGAGAGATCCCTA	1	Kcnma1_-_23803403.23-ENSMUST00000172099.2,ENSMUST00000074983.6	GCAAAGGGTTTCCCAGATGA	2	Kcnma1_-_23803449.23-ENSMUST00000172099.2,ENSMUST00000074983.6|Kcnma1_-_23803403.23-ENSMUST00000172099.2,ENSMUST00000074983.6
Psen2	P2	Psen2_-_180230102.23-P2	GGGGTGAAGTTCAGGGACAC	1	Psen2_-_180230183.23-P2	GAATAATGGTGCTCAGTGAG	2	Psen2_-_180230102.23-P2|Psen2_-_180230183.23-P2
Mbd1	P1P2	Mbd1_-_74268084.23-P1P2	GCCGAGGCGCGCAGACGCAC	1	Mbd1_-_74268142.23-P1P2	GCGCAGGCGCTGAAGATCCC	2	Mbd1_-_74268084.23-P1P2|Mbd1_-_74268142.23-P1P2
Dhx16	P1P2	Dhx16_-_35879657.23-P1P2	GCACCCGCGCACAGATCATT	1	Dhx16_+_35879746.23-P1P2	GTCCGGCCAGGGATCGACGG	2	Dhx16_-_35879657.23-P1P2|Dhx16_+_35879746.23-P1P2
Il9	P1P2	Il9_-_56482407.23-P1P2	GAGTCTGAGTCACTTGACAA	1	Il9_-_56482634.23-P1P2	GTTACAGGGGTGGTAATGAA	2	Il9_-_56482407.23-P1P2|Il9_-_56482634.23-P1P2
Slu7	P1	Slu7_-_43433741.23-P1	GTCTCTGCGCAGCCGGAAGA	1	Slu7_+_43433710.23-P1	GGCTGCGCAGAGATAACTTC	2	Slu7_-_43433741.23-P1|Slu7_+_43433710.23-P1
Bcl2l10	P1P2	Bcl2l10_+_75347781.23-P1P2	GGGTACAAGGAGAGCGTCAT	1	Bcl2l10_+_75347759.23-P1P2	GGTGGGGCAAGCAGGAGCAG	2	Bcl2l10_+_75347781.23-P1P2|Bcl2l10_+_75347759.23-P1P2
Fbxw8	P1P2	Fbxw8_-_118155465.23-P1P2	GCGCCGGAAGTGTCCGTAGT	1	Fbxw8_+_118155512.23-P1P2	GAAGGGATGTCGAAGCAGAG	2	Fbxw8_-_118155465.23-P1P2|Fbxw8_+_118155512.23-P1P2
Hoxc6	P1P2	Hoxc6_+_102997922.23-P1P2	GAGAGCAGACAGGGGAAGTA	1	Hoxc6_-_102998039.23-P1P2	GCTCCCTTTCTGAGAGAATT	2	Hoxc6_+_102997922.23-P1P2|Hoxc6_-_102998039.23-P1P2
Arx	P1P2	Arx_-_93286587.23-P1P2	GTGGGAGCCCGCAACCGAGG	1	Arx_+_93286372.23-P1P2	GGCGAACTGGATTTCGGAGA	2	Arx_-_93286587.23-P1P2|Arx_+_93286372.23-P1P2
Krtap6-3	P1P2	Krtap6-3_-_89083812.23-P1P2	GCTAGACAAGCTGTTGAAAA	1	Krtap6-3_+_89083848.23-P1P2	GTCTCTATGTCACAATTCTA	2	Krtap6-3_-_89083812.23-P1P2|Krtap6-3_+_89083848.23-P1P2
Snhg11	P1P2	Snhg11_-_158375620.23-P1P2	GCCACTGGCCAGTTGCGCAA	1	Snhg11_-_158375534.23-P1P2	GTGGAAGCTAGGACTAAGGA	2	Snhg11_-_158375620.23-P1P2|Snhg11_-_158375534.23-P1P2
Slc1a5	P1P2	Slc1a5_+_16781204.23-P1P2	GGCGGAGCCAAGATCACAGT	1	Slc1a5_+_16781194.23-P1P2	GGATCACAGTGGGCAACCTA	2	Slc1a5_+_16781204.23-P1P2|Slc1a5_+_16781194.23-P1P2
Cd300lg	P1P2	Cd300lg_-_102041400.23-P1P2	GTAGGGGCTGGAGATTGGGT	1	Cd300lg_-_102041435.23-P1P2	GGTAACTGGCACTGGGTAGA	2	Cd300lg_-_102041400.23-P1P2|Cd300lg_-_102041435.23-P1P2
Cxcr4	P1P2	Cxcr4_-_128592390.23-P1P2	GGGCGGGAGGAGACTGGCGG	1	Cxcr4_+_128592510.23-P1P2	GGCGACCCGCAGAAACACCC	2	Cxcr4_-_128592390.23-P1P2|Cxcr4_+_128592510.23-P1P2
Med8	P1P2	Med8_+_118409155.23-P1P2	GCGCCCCGAGCCAGAGGTGA	1	Med8_-_118409167.23-P1P2	GCCCGCCCATCCCTCACCTC	2	Med8_+_118409155.23-P1P2|Med8_-_118409167.23-P1P2
Atp5o	P1P2	Atp5o_+_91931720.23-P1P2	GAGTCCAGCCGGACCGCGGC	1	Atp5o_-_91931738.23-P1P2	GGTACCTGCCGCGGTCCGGC	2	Atp5o_+_91931720.23-P1P2|Atp5o_-_91931738.23-P1P2
Pam16	P1P2	Pam16_-_4625046.23-P1P2	GTCGGGGCCAGAGGACCAGT	1	Pam16_+_4625031.23-P1P2	GGGGCCGCCCACTGGTCCTC	2	Pam16_-_4625046.23-P1P2|Pam16_+_4625031.23-P1P2
Slc8b1	P1P2	Slc8b1_-_120511104.23-P1P2	GGGGCGGGGCGAGCCTTAAA	1	Slc8b1_-_120511160.23-P1P2	GGGCCCGACTGGCAAGTAGG	2	Slc8b1_-_120511104.23-P1P2|Slc8b1_-_120511160.23-P1P2
Rnpep	P1P2	Rnpep_-_135284225.23-P1P2	GACCCTGAGACCGAAGTAGG	1	Rnpep_+_135284155.23-P1P2	GGAGGGGTTGTGTGCCACAA	2	Rnpep_-_135284225.23-P1P2|Rnpep_+_135284155.23-P1P2
Acnat1	P1P2	Acnat1_+_49474127.23-P1P2	Gcaaccaagtcacagacttc	1	Acnat1_-_49474145.23-P1P2	Gacacctgaagtctgtgact	2	Acnat1_+_49474127.23-P1P2|Acnat1_-_49474145.23-P1P2
Copg2	P1P2	Copg2_-_30896914.23-P1P2	GGCTCCGCCCACTGCCGCAC	1	Copg2_-_30896875.23-P1P2	GCGGCCGCCCTTGCCCCCTA	2	Copg2_-_30896914.23-P1P2|Copg2_-_30896875.23-P1P2
Pla2g2d	P1P2	Pla2g2d_-_138775754.23-P1P2	GAAGCAGGAGGCGCGTGGGT	1	Pla2g2d_-_138775769.23-P1P2	GGGGTTGGGTAGGATTCGCA	2	Pla2g2d_-_138775754.23-P1P2|Pla2g2d_-_138775769.23-P1P2
Cd300e	P1P2	Cd300e_+_115062324.23-P1P2	GAAGGGAGCTGGAGAAACAA	1	Cd300e_-_115062229.23-P1P2	GAATCGCTTCAGAGAATGAA	2	Cd300e_+_115062324.23-P1P2|Cd300e_-_115062229.23-P1P2
1700093K21Rik	P1P2	1700093K21Rik_-_23519318.23-P1P2	GGGAAGGCCACCAACTTCTC	1	1700093K21Rik_-_23519333.23-P1P2	GTCTCTGGGGCTGTGGACTA	2	1700093K21Rik_-_23519318.23-P1P2|1700093K21Rik_-_23519333.23-P1P2
Csf2	P1P2	Csf2_+_54249826.23-P1P2	GGGGCTGCCAGTTCTTGGAA	1	Csf2_-_54249802.23-P1P2	GAGCCTTCCCCCAGGTTGTC	2	Csf2_+_54249826.23-P1P2|Csf2_-_54249802.23-P1P2
Foxh1	P1P2	Foxh1_+_76670041.23-P1P2	GTGGGAGTGGAGATTGATTT	1	Foxh1_+_76670068.23-P1P2	GGGTATGCCCAGACACCCAA	2	Foxh1_+_76670041.23-P1P2|Foxh1_+_76670068.23-P1P2
Ubl4b	P1P2	Ubl4b_-_107555148.23-P1P2	GGGACAGCAGAGGGGCATTG	1	Ubl4b_+_107555320.23-P1P2	GAGAGCAGGAAAAGTACTCA	2	Ubl4b_-_107555148.23-P1P2|Ubl4b_+_107555320.23-P1P2
Ncoa6	P1P2	Ncoa6_+_155473912.23-P1P2	GAGGGGACGCCCGATCACGT	1	Ncoa6_-_155473925.23-P1P2	GggccccTGCCCACGTGATC	2	Ncoa6_+_155473912.23-P1P2|Ncoa6_-_155473925.23-P1P2
Apln	P1P2	Apln_-_48035031.23-P1P2	GCATGCTGCAGCCCTATCCA	1	Apln_+_48035020.23-P1P2	GCTCTCTCGCGCCCTGGATA	2	Apln_-_48035031.23-P1P2|Apln_+_48035020.23-P1P2
BC051142	P1	BC051142_-_34398581.23-P1	GTGAAGCTGTGCGAGAGCAA	1	BC051142_-_34398799.23-P1	GCAGCCTCTTGATTGGACCA	2	BC051142_-_34398581.23-P1|BC051142_-_34398799.23-P1
Fam43b	P1P2	Fam43b_-_138396617.23-P1P2	GAAGAATAGAGGGGCAGCGA	1	Fam43b_-_138396556.23-P1P2	GGCTTCCCAAGACCCAGCAC	2	Fam43b_-_138396617.23-P1P2|Fam43b_-_138396556.23-P1P2
Vwa8	P1P2	Vwa8_-_78849046.23-P1P2	GCCAGCTCCGGGCGTCCCTG	1	Vwa8_+_78849039.23-P1P2	GCCCAGGCGTGGTCGCCCCA	2	Vwa8_-_78849046.23-P1P2|Vwa8_+_78849039.23-P1P2
Calcoco2	ENSMUST00000068686.6,ENSMUST00000097162.5	Calcoco2_+_96112031.23-ENSMUST00000068686.6,ENSMUST00000097162.5	GCTGTCCCGCGGCAAGGGCG	1	Calcoco2_-_96112205.23-ENSMUST00000068686.6,ENSMUST00000097162.5	GGGCATTGAGAGTTCATCTA	2	Calcoco2_+_96112031.23-ENSMUST00000068686.6,ENSMUST00000097162.5|Calcoco2_-_96112205.23-ENSMUST00000068686.6,ENSMUST00000097162.5
Hrh3	P1P2	Hrh3_+_180104607.23-P1P2	GCCGGGGCAGGGGTTCTAGT	1	Hrh3_+_180104617.23-P1P2	GACGGTGCGCACCGGGGCAG	2	Hrh3_+_180104607.23-P1P2|Hrh3_+_180104617.23-P1P2
Olfr967	ENSMUST00000069561.1	Olfr967_+_39750227.23-ENSMUST00000069561.1	GTCATCAGTCAAGACAGGAG	1	Olfr967_+_39750232.23-ENSMUST00000069561.1	GGTATCTCATCAGTCAAGAC	2	Olfr967_+_39750227.23-ENSMUST00000069561.1|Olfr967_+_39750232.23-ENSMUST00000069561.1
Zc3hc1	P1P2	Zc3hc1_+_30391025.23-P1P2	GCCTGAGCCTAAACACGCGA	1	Zc3hc1_-_30391098.23-P1P2	GTGACCTATCAAAATAGTGA	2	Zc3hc1_+_30391025.23-P1P2|Zc3hc1_-_30391098.23-P1P2
Olfr1352	ENSMUST00000058991.3	Olfr1352_-_78980917.23-ENSMUST00000058991.3	GTGGACAGTATGTAAGTCTA	1	Olfr1352_-_78980891.23-ENSMUST00000058991.3	GGAGTGTGAGCAATGAGGTC	2	Olfr1352_-_78980917.23-ENSMUST00000058991.3|Olfr1352_-_78980891.23-ENSMUST00000058991.3
Tmprss6	P1P2	Tmprss6_+_78468796.23-P1P2	GCACCCTGTTAGGGGACCAG	1	Tmprss6_+_78468753.23-P1P2	GACCAAGCAACAGGCCCCGG	2	Tmprss6_+_78468796.23-P1P2|Tmprss6_+_78468753.23-P1P2
Lrrc39	P1P2	Lrrc39_+_116562593.23-P1P2	Gcaggccagaagaacttgtt	1	Lrrc39_+_116562910.23-P1P2	GACGTGGGGCTTCTGTGCAA	2	Lrrc39_+_116562593.23-P1P2|Lrrc39_+_116562910.23-P1P2
Olfr1264	ENSMUST00000099758.1	Olfr1264_+_90022254.23-ENSMUST00000099758.1	GTAGTGCTCCGTGAAGCAAA	1	Olfr1264_+_90022357.23-ENSMUST00000099758.1	GGTCGGAAGTACATCTCATT	2	Olfr1264_+_90022254.23-ENSMUST00000099758.1|Olfr1264_+_90022357.23-ENSMUST00000099758.1
Bet1l	P1P2	Bet1l_-_140856385.23-P1P2	GCAGACCTGGAGTGCTTCTC	1	Bet1l_-_140856430.23-P1P2	GCCACCAGCATTCGGACCCA	2	Bet1l_-_140856385.23-P1P2|Bet1l_-_140856430.23-P1P2
Dtwd2	P1P2	Dtwd2_-_49755640.23-P1P2	GCGCGCGCACGTCACGTAGG	1	Dtwd2_-_49755750.23-P1P2	GAAGGAGATTGTGAGCCTAG	2	Dtwd2_-_49755640.23-P1P2|Dtwd2_-_49755750.23-P1P2
Grhl2	P1P2	Grhl2_-_37233019.23-P1P2	GACCGCGCAGCTCGGCCCTC	1	Grhl2_+_37232749.23-P1P2	GGTACCGTGGGTCAAACCGA	2	Grhl2_-_37233019.23-P1P2|Grhl2_+_37232749.23-P1P2
Olfr687	ENSMUST00000098154.3	Olfr687_+_105275264.23-ENSMUST00000098154.3	GTCTTTATGGCGGTCTTTAC	1	Olfr687_-_105275293.23-ENSMUST00000098154.3	GGACCGCCATAAAGAAATTG	2	Olfr687_+_105275264.23-ENSMUST00000098154.3|Olfr687_-_105275293.23-ENSMUST00000098154.3
Gas1	P1P2	Gas1_+_60177573.23-P1P2	GAGCTCGCAAAGCCGGGGAA	1	Gas1_+_60177490.23-P1P2	GGGGCCAGGGCTCGGCGAGC	2	Gas1_+_60177573.23-P1P2|Gas1_+_60177490.23-P1P2
Timm8b	P1P2	Timm8b_-_50603871.23-P1P2	GCCCGCGTAAAAGAACGGTG	1	Timm8b_+_50603736.23-P1P2	GGCAGTGGCCAAGGAGCTCG	2	Timm8b_-_50603871.23-P1P2|Timm8b_+_50603736.23-P1P2
Mmp19	P1P2	Mmp19_-_128790875.23-P1P2	GGTGAGTTGCAACATCTCTC	1	Mmp19_-_128790797.23-P1P2	GAGCAGAGAACTCTGGGGGT	2	Mmp19_-_128790875.23-P1P2|Mmp19_-_128790797.23-P1P2
Olfr181	ENSMUST00000075361.3	Olfr181_-_58928832.23-ENSMUST00000075361.3	GGATTCTAAAGGGAGTTCAT	1	Olfr181_-_58928845.23-ENSMUST00000075361.3	GGTTCATTGGCATTGACATT	2	Olfr181_-_58928832.23-ENSMUST00000075361.3|Olfr181_-_58928845.23-ENSMUST00000075361.3
C1qa	P1P2	C1qa_+_136898876.23-P1P2	GTGGCCCTGGGGAAGTTCAG	1	C1qa_-_136898994.23-P1P2	GGGGAGGACTCTGAAGATGG	2	C1qa_+_136898876.23-P1P2|C1qa_-_136898994.23-P1P2
Abca4	P1P2	Abca4_+_122044298.23-P1P2	GACACAAGTGCGGGCACGGA	1	Abca4_+_122044228.23-P1P2	GCCTCCACCGGACATCAGAG	2	Abca4_+_122044298.23-P1P2|Abca4_+_122044228.23-P1P2
Clcc1	P1P2	Clcc1_-_108653805.23-P1P2	GACCGTCTGAACTGAACTGG	1	Clcc1_+_108653822.23-P1P2	GCTCCTCTGCTCTGAAGTAA	2	Clcc1_-_108653805.23-P1P2|Clcc1_+_108653822.23-P1P2
Ddx19b	P1P2	Ddx19b_+_111027874.23-P1P2	GGATCTGCAGCGAAGGGTGA	1	Ddx19b_+_111027847.23-P1P2	GAACCCGAAGAGGACAGTAG	2	Ddx19b_+_111027874.23-P1P2|Ddx19b_+_111027847.23-P1P2
Dzip3	P1P2	Dzip3_+_48994103.23-P1P2	GTGGGACTGCAGTCGGTGAT	1	Dzip3_-_48994239.23-P1P2	GGACCGCTGAAGACAGAGGG	2	Dzip3_+_48994103.23-P1P2|Dzip3_-_48994239.23-P1P2
Smim1	P1P2	Smim1_-_154026086.23-P1P2	GAAGTCTAGTCTAGATGAGG	1	Smim1_+_154026545.23-P1P2	GGCACCCTCCTCTGGGTCAG	2	Smim1_-_154026086.23-P1P2|Smim1_+_154026545.23-P1P2
Cblc	P1P2	Cblc_-_19796966.23-P1P2	GTGGACGCCTGTAGAGTCTG	1	Cblc_-_19796913.23-P1P2	GGACTGTAGGTAAAAGGGGC	2	Cblc_-_19796966.23-P1P2|Cblc_-_19796913.23-P1P2
Mapk8ip1	P1P2	Mapk8ip1_+_92401421.23-P1P2	GAATGTCCCTGGGATGTGTA	1	Mapk8ip1_+_92401418.23-P1P2	GGTCCCTGGGATGTGTAGGG	2	Mapk8ip1_+_92401421.23-P1P2|Mapk8ip1_+_92401418.23-P1P2
Tmsb4x	P1P2	Tmsb4x_+_167209295.23-P1P2	GCTGGTGAATGGGGATGTGG	1	Tmsb4x_-_167209275.23-P1P2	GTCTCCGGAAGGGCGTTCGG	2	Tmsb4x_+_167209295.23-P1P2|Tmsb4x_-_167209275.23-P1P2
Igsf21	P1P2	Igsf21_+_140247123.23-P1P2	GCGGAGGAAAGGGGCGTCCA	1	Igsf21_+_140246918.23-P1P2	GAGAGCCGAACAGCCCAGAA	2	Igsf21_+_140247123.23-P1P2|Igsf21_+_140246918.23-P1P2
Rab11b	P1P2	Rab11b_+_33760449.23-P1P2	GAGACCGAGGGCTAGAAGGG	1	Rab11b_+_33760452.23-P1P2	GGGGAGACCGAGGGCTAGAA	2	Rab11b_+_33760449.23-P1P2|Rab11b_+_33760452.23-P1P2
Scgb2b17	ENSMUST00000182640.1,ENSMUST00000182673.1	Scgb2b17_+_33057072.23-ENSMUST00000182640.1,ENSMUST00000182673.1	GACAAAAGGAATGAGCAACT	1	Scgb2b17_+_33057052.23-ENSMUST00000182640.1,ENSMUST00000182673.1	GGGGAGTGAAGCACAATTTG	2	Scgb2b17_+_33057072.23-ENSMUST00000182640.1,ENSMUST00000182673.1|Scgb2b17_+_33057052.23-ENSMUST00000182640.1,ENSMUST00000182673.1
Eepd1	P1P2	Eepd1_+_25481471.23-P1P2	GCAGGGGCGGGATCATTGGT	1	Eepd1_+_25481475.23-P1P2	GGCGCCAGGGGCGGGATCAT	2	Eepd1_+_25481471.23-P1P2|Eepd1_+_25481475.23-P1P2
Fmo4	P1P2	Fmo4_-_162814059.23-P1P2	GAAGGCTGGGTGCCTTTAGA	1	Fmo4_+_162814074.23-P1P2	GAATCAGGGTGTCACTAAGA	2	Fmo4_-_162814059.23-P1P2|Fmo4_+_162814074.23-P1P2
SYNB	ENSMUST00000184652.1	SYNB_-_69513088.23-ENSMUST00000184652.1	GGAAAAGTGACTGGCGGAGG	1	SYNB_-_69513082.23-ENSMUST00000184652.1	GAACTTTGAAAAGTGACTGG	2	SYNB_-_69513088.23-ENSMUST00000184652.1|SYNB_-_69513082.23-ENSMUST00000184652.1
Ppp4c	P1P2	Ppp4c_-_126792635.23-P1P2	GGGCGGGCGAAGTTGGTTGG	1	Ppp4c_-_126792615.23-P1P2	GAAGAGAAGTAGCCGGAAGT	2	Ppp4c_-_126792635.23-P1P2|Ppp4c_-_126792615.23-P1P2
Tex37	P1P2	Tex37_+_70919046.23-P1P2	GCTCCCGGAGGGGTAAGACA	1	Tex37_-_70919107.23-P1P2	GAACTGGATCAGAATAAACC	2	Tex37_+_70919046.23-P1P2|Tex37_-_70919107.23-P1P2
Batf2	P1P2	Batf2_-_6164337.23-P1P2	GCGTGAGCGAGCAAGAGCCA	1	Batf2_+_6164302.23-P1P2	GCGCTCACGCTCACTCACGT	2	Batf2_-_6164337.23-P1P2|Batf2_+_6164302.23-P1P2
Adipor2	P1	Adipor2_+_119417624.23-P1	GGAACGGCCTAGGACGGCTA	1	Adipor2_-_119417595.23-P1	GCTATTGAGCCAGGGGACGA	2	Adipor2_+_119417624.23-P1|Adipor2_-_119417595.23-P1
Lonp2	P1P2	Lonp2_-_86623973.23-P1P2	GGGGCGAGTCCGAAGCGTCC	1	Lonp2_+_86623906.23-P1P2	GGGCCCGCCCACAACCCTTC	2	Lonp2_-_86623973.23-P1P2|Lonp2_+_86623906.23-P1P2
Bnip3l	P1	Bnip3l_-_67008976.23-P1	GGGGTCGGAGCCCAGGATAG	1	Bnip3l_+_67008964.23-P1	GTGGTCACGCCCCCTATCCT	2	Bnip3l_-_67008976.23-P1|Bnip3l_+_67008964.23-P1
BC051070	P1P2	BC051070_-_106406302.23-P1P2	GCATCAGTGCAAGTTTCTAT	1	BC051070_+_106406407.23-P1P2	GGTAGCCCATGAATGGAGAG	2	BC051070_-_106406302.23-P1P2|BC051070_+_106406407.23-P1P2
Lzts2	P1	Lzts2_+_45017961.23-P1	GCCAGCCAGGGCGCACGCGG	1	Lzts2_+_45018049.23-P1	GTGGGCGGTGCGCACTGATG	2	Lzts2_+_45017961.23-P1|Lzts2_+_45018049.23-P1
Smim17	P1P2	Smim17_-_6415015.23-P1P2	GCCACCTTGGCTAGACCCTC	1	Smim17_-_6415034.23-P1P2	GAGGAACTGTACTACACCAC	2	Smim17_-_6415015.23-P1P2|Smim17_-_6415034.23-P1P2
Iffo2	P1P2	Iffo2_-_139574558.23-P1P2	GATAGAGGGCGGGCCGGGAA	1	Iffo2_-_139574475.23-P1P2	GCGGGTGAAATCGCTGCAAT	2	Iffo2_-_139574558.23-P1P2|Iffo2_-_139574475.23-P1P2
Clptm1	P1P2	Clptm1_+_19665161.23-P1P2	GGGGCGGACGTCGAGTACGG	1	Clptm1_+_19665164.23-P1P2	GAAGGGGCGGACGTCGAGTA	2	Clptm1_+_19665161.23-P1P2|Clptm1_+_19665164.23-P1P2
Cwc15	P1P2	Cwc15_+_14500556.23-P1P2	GCCACACCCGGAAGCAATTC	1	Cwc15_+_14500592.23-P1P2	GTTCGCACTTCCAATGGCTG	2	Cwc15_+_14500556.23-P1P2|Cwc15_+_14500592.23-P1P2
Fbxo46	P2	Fbxo46_+_19131514.23-P2	GTAGGCGGGAGGTTACTGGG	1	Fbxo46_+_19131484.23-P2	GGGGATGGAAACAGTATTAC	2	Fbxo46_+_19131514.23-P2|Fbxo46_+_19131484.23-P2
Akr1c14	P1	Akr1c14_+_4059316.23-P1	GATGGACAGCAATCAATCAC	1	Akr1c14_-_4059312.23-P1	GGTAGCTGAAGTTACTTTCT	2	Akr1c14_+_4059316.23-P1|Akr1c14_-_4059312.23-P1
Bai3	P1P2	Bai3_-_25830285.23-P1P2	GTGGGTGCGCGCGTCCCCGG	1	Bai3_-_25830267.23-P1P2	GCTCCCGCGCGCGTGCTCGT	2	Bai3_-_25830285.23-P1P2|Bai3_-_25830267.23-P1P2
Hira	P1P2	Hira_+_18877033.23-P1P2	GCGGCGATGCAGAACCAGGG	1	Hira_-_18877102.23-P1P2	GTGCTCACACCGACCCTCAT	2	Hira_+_18877033.23-P1P2|Hira_-_18877102.23-P1P2
Smad2	P1P2	Smad2_+_76241761.23-P1P2	GGGCGCGCACGGAAGACGGA	1	Smad2_+_76241598.23-P1P2	GGGTGTGAGCACCGCGTCGG	2	Smad2_+_76241761.23-P1P2|Smad2_+_76241598.23-P1P2
Sprr2h	P1P2	Sprr2h_+_92385504.23-P1P2	GTTCCTGGACACATAGTCAC	1	Sprr2h_-_92385523.23-P1P2	GACCCAGTGACTATGTGTCC	2	Sprr2h_+_92385504.23-P1P2|Sprr2h_-_92385523.23-P1P2
Ints10	P1P2	Ints10_-_68793924.23-P1P2	GGGACTCTACAGAACCTCTG	1	Ints10_-_68793857.23-P1P2	GAGCGGCGCGCTACCATCGA	2	Ints10_-_68793924.23-P1P2|Ints10_-_68793857.23-P1P2
Atl1	P1P2	Atl1_+_69893034.23-P1P2	GGGTGGGGAACGTGGTGCGG	1	Atl1_-_69893087.23-P1P2	GTCACCGGGAGACACGTTCG	2	Atl1_+_69893034.23-P1P2|Atl1_-_69893087.23-P1P2
Gm11711	P1P2	Gm11711_-_115048489.23-P1P2	GACCAAGTCAGGACATGTGA	1	Gm11711_-_115048507.23-P1P2	GAGGGACAGCTGGGTAAACA	2	Gm11711_-_115048489.23-P1P2|Gm11711_-_115048507.23-P1P2
Auh	P1P2	Auh_+_52929733.23-P1P2	GGGAGGGGCCAGACAACGAG	1	Auh_-_52929609.23-P1P2	GCGGACGCCAACCGTTCTCA	2	Auh_+_52929733.23-P1P2|Auh_-_52929609.23-P1P2
Cml1	P1P2	Cml1_-_85915758.23-P1P2	GAGAGAGCTAAGTTTCCTAG	1	Cml1_+_85915674.23-P1P2	GGAGGCGCCCAGTTTCCGGT	2	Cml1_-_85915758.23-P1P2|Cml1_+_85915674.23-P1P2
Htr1d	P1P2	Htr1d_-_136424568.23-P1P2	GTGGGGAGCGAGCCCAGCGG	1	Htr1d_+_136424252.23-P1P2	Gtggggctcacgttctactg	2	Htr1d_-_136424568.23-P1P2|Htr1d_+_136424252.23-P1P2
Inpp5a	P2	Inpp5a_-_139400369.23-P2	GATCTGGAGTCACTCTCCTA	1	Inpp5a_+_139400294.23-P2	GAGGTCTCACCTCCAGCATA	2	Inpp5a_-_139400369.23-P2|Inpp5a_+_139400294.23-P2
Vip	P1P2	Vip_+_5639120.23-P1P2	GGTCACAGTAGTGATCCCAT	1	Vip_+_5639111.23-P1P2	GGTGATCCCATGGGATGAAC	2	Vip_+_5639120.23-P1P2|Vip_+_5639111.23-P1P2
Vmn1r12	ENSMUST00000073384.3	Vmn1r12_-_57158771.23-ENSMUST00000073384.3	GTAGACTATAATGTACACTC	1	Vmn1r12_-_57158826.23-ENSMUST00000073384.3	GAACTAATATAGAAAATAGA	2	Vmn1r12_-_57158771.23-ENSMUST00000073384.3|Vmn1r12_-_57158826.23-ENSMUST00000073384.3
Wdr11	P1P2	Wdr11_+_129591756.23-P1P2	GAATCCCATGGAGTGTGGGT	1	Wdr11_+_129591761.23-P1P2	GAAGTGAATCCCATGGAGTG	2	Wdr11_+_129591756.23-P1P2|Wdr11_+_129591761.23-P1P2
Pmaip1	P1P2	Pmaip1_-_66458431.23-P1P2	GTCGGCGCCGCGGCGATCTG	1	Pmaip1_+_66458403.23-P1P2	GTCGCCGCGGCGCCGACCTA	2	Pmaip1_-_66458431.23-P1P2|Pmaip1_+_66458403.23-P1P2
Dctn3	P1P2	Dctn3_+_41723295.23-P1P2	GAGGACCCAGAACGTTACCT	1	Dctn3_-_41723312.23-P1P2	GGTTACCTAGGTAACGTTCT	2	Dctn3_+_41723295.23-P1P2|Dctn3_-_41723312.23-P1P2
Lama2	P1P2	Lama2_+_27617259.23-P1P2	GCCAGCGTGAGGTTCCCCGT	1	Lama2_-_27616929.23-P1P2	GCTGCCCTGCCACCGCCCAA	2	Lama2_+_27617259.23-P1P2|Lama2_-_27616929.23-P1P2
Ifna11	ENSMUST00000170428.1	Ifna11_-_88819761.23-ENSMUST00000170428.1	GAACCCACATGCCTGAGGGG	1	Ifna11_+_88819742.23-ENSMUST00000170428.1	GCCCCCCCCCTCAGGCATGT	2	Ifna11_-_88819761.23-ENSMUST00000170428.1|Ifna11_+_88819742.23-ENSMUST00000170428.1
Hhex	P1	Hhex_-_37434666.23-P1	GGGGCGGGAGCTGGGCCGGT	1	Hhex_-_37434609.23-P1	GCGGCGCAGGAACACCCTGG	2	Hhex_-_37434666.23-P1|Hhex_-_37434609.23-P1
1700026L06Rik	P1P2	1700026L06Rik_-_28699771.23-P1P2	GGCAACCCGGTCACATGACT	1	1700026L06Rik_-_28699834.23-P1P2	GCCCCACCCCCATATGATCT	2	1700026L06Rik_-_28699771.23-P1P2|1700026L06Rik_-_28699834.23-P1P2
Speer2	P1P2	Speer2_-_69864066.23-P1P2	Gagggcgattgcggggatag	1	Speer2_-_69864070.23-P1P2	Gcgattgcggggataggggt	2	Speer2_-_69864066.23-P1P2|Speer2_-_69864070.23-P1P2
Rdh9	P2	Rdh9_-_127759604.23-P2	GCCTGGGCCTTGACGGATGT	1	Rdh9_+_127759544.23-P2	GCATGGCCCCATCTGAGCAT	2	Rdh9_-_127759604.23-P2|Rdh9_+_127759544.23-P2
Trpv5	P1P2	Trpv5_-_41680918.23-P1P2	GAAACAGCCTGGTGTAGGGA	1	Trpv5_-_41681001.23-P1P2	GAGGTGGGGCCAAGGAATTT	2	Trpv5_-_41680918.23-P1P2|Trpv5_-_41681001.23-P1P2
Exoc2	P1P2	Exoc2_-_30974206.23-P1P2	GGGAAGTTAGAGGATATCGA	1	Exoc2_-_30974227.23-P1P2	GGCATGGAAGTGGACAgaga	2	Exoc2_-_30974206.23-P1P2|Exoc2_-_30974227.23-P1P2
Sh3bp2	P1	Sh3bp2_-_34525753.23-P1	GGGGCGGAGTGGCAGTGCGA	1	Sh3bp2_-_34525771.23-P1	GAGGGTGGGGATCAGAACCT	2	Sh3bp2_-_34525753.23-P1|Sh3bp2_-_34525771.23-P1
Zfp455	P1P2	Zfp455_-_67194328.23-P1P2	GGAGTCGAGCGCTTTAAAGT	1	Zfp455_+_67194329.23-P1P2	Gaggtactatggtaggtact	2	Zfp455_-_67194328.23-P1P2|Zfp455_+_67194329.23-P1P2
Lrrc6	P1P2	Lrrc6_-_66501091.23-P1P2	GGGAGCCTTTACTTCCTAAT	1	Lrrc6_+_66501083.23-P1P2	GCCCAGGGAAAGATCCCATT	2	Lrrc6_-_66501091.23-P1P2|Lrrc6_+_66501083.23-P1P2
Olfr1031	ENSMUST00000050942.2	Olfr1031_-_85991498.23-ENSMUST00000050942.2	GAGAATTAGAAGTAGATATT	1	Olfr1031_-_85991689.23-ENSMUST00000050942.2	GAATCTACTAATAGACTGAT	2	Olfr1031_-_85991498.23-ENSMUST00000050942.2|Olfr1031_-_85991689.23-ENSMUST00000050942.2
Cd209d	P1P2	Cd209d_+_3878756.23-P1P2	GCAAAGTAGACGTACTCTAT	1	Cd209d_-_3878663.23-P1P2	GCAACCCAGGAATTTTTTTA	2	Cd209d_+_3878756.23-P1P2|Cd209d_-_3878663.23-P1P2
Prss42	P1P2	Prss42_-_110797993.23-P1P2	GGGGAGGTCTCTATCAAGGA	1	Prss42_-_110797973.23-P1P2	GGAAGTAAGGGGTCCTGAAT	2	Prss42_-_110797993.23-P1P2|Prss42_-_110797973.23-P1P2
Sox12	P1P2	Sox12_-_152397882.23-P1P2	GAGGGGGAGGTCAGTGGCGC	1	Sox12_-_152397980.23-P1P2	GCCAAGGACTCGAGCCTCGT	2	Sox12_-_152397882.23-P1P2|Sox12_-_152397980.23-P1P2
Olfr922	ENSMUST00000051004.4	Olfr922_-_38815207.23-ENSMUST00000051004.4	GCCTAAATGACAGTCTTCAT	1	Olfr922_-_38815221.23-ENSMUST00000051004.4	GTTCATTGGCTGTCAATGCA	2	Olfr922_-_38815207.23-ENSMUST00000051004.4|Olfr922_-_38815221.23-ENSMUST00000051004.4
Lcn4	P1P2	Lcn4_+_26671584.23-P1P2	GGAAACTAAGACTGTGTTAA	1	Lcn4_+_26671489.23-P1P2	GCTGAATCGTTCAATCTCTC	2	Lcn4_+_26671584.23-P1P2|Lcn4_+_26671489.23-P1P2
Diras2	P1P2	Diras2_+_52530764.23-P1P2	GGAGCCAGAGAGCACCGCGT	1	Diras2_+_52530661.23-P1P2	GCGGGTGCATAAGGCAGAGA	2	Diras2_+_52530764.23-P1P2|Diras2_+_52530661.23-P1P2
Pabpc1	P1P2	Pabpc1_-_36609093.23-P1P2	GGAGGCGGAGGAAAGCGCAG	1	Pabpc1_+_36609261.23-P1P2	GGGGCGGGGCGTGTGCGCAA	2	Pabpc1_-_36609093.23-P1P2|Pabpc1_+_36609261.23-P1P2
Olfr165	ENSMUST00000052516.4	Olfr165_+_19408236.23-ENSMUST00000052516.4	Ggggggggacaaggggtaga	1	Olfr165_-_19408166.23-ENSMUST00000052516.4	GAGCTATTTTATTTGGTAat	2	Olfr165_+_19408236.23-ENSMUST00000052516.4|Olfr165_-_19408166.23-ENSMUST00000052516.4
Kif12	P1P2	Kif12_-_63172220.23-P1P2	GCAGGGCATTCCAGCTAGGG	1	Kif12_+_63172121.23-P1P2	GGGGCAGGCTGCAGTATTTC	2	Kif12_-_63172220.23-P1P2|Kif12_+_63172121.23-P1P2
Olfr812	ENSMUST00000057775.2	Olfr812_+_129843248.23-ENSMUST00000057775.2	GTTCTATTAACAGAACAGTA	1	Olfr812_-_129843474.23-ENSMUST00000057775.2	GACTACCAGTCCTCTCCTAT	2	Olfr812_+_129843248.23-ENSMUST00000057775.2|Olfr812_-_129843474.23-ENSMUST00000057775.2
Aplp1	P1P2	Aplp1_-_30445683.23-P1P2	GAGGCTCCGGAACCCCGGGA	1	Aplp1_+_30445673.23-P1P2	GTGGAGCAGGCTCCCTCCCG	2	Aplp1_-_30445683.23-P1P2|Aplp1_+_30445673.23-P1P2
Ccdc70	P1P2	Ccdc70_-_21970483.23-P1P2	GGGTTTGGGGAGGGGACTAA	1	Ccdc70_+_21970357.23-P1P2	GAGCCTCTCACTCAGACTCA	2	Ccdc70_-_21970483.23-P1P2|Ccdc70_+_21970357.23-P1P2
Atp5a1	P1P2	Atp5a1_-_77773825.23-P1P2	GAAAATGTTGAGTACCAGGG	1	Atp5a1_-_77773728.23-P1P2	GCCCAGGCAGGTGACGTTCA	2	Atp5a1_-_77773825.23-P1P2|Atp5a1_-_77773728.23-P1P2
Col13a1	P1P2	Col13a1_-_61979302.23-P1P2	GGACCTCGGTAGCCCCCGTC	1	Col13a1_+_61979294.23-P1P2	GGGCACCAGGAGCCCCGGAC	2	Col13a1_-_61979302.23-P1P2|Col13a1_+_61979294.23-P1P2
Selo	P1P2	Selo_-_89088993.23-P1P2	GACGGCTCGTAGCCTGGAAG	1	Selo_-_89088915.23-P1P2	GGGGTGGGAGCTTCGGACCT	2	Selo_-_89088993.23-P1P2|Selo_-_89088915.23-P1P2
Uts2b	P1P2	Uts2b_-_27370363.23-P1P2	GAGACTGGCTACACACTCCA	1	Uts2b_-_27370367.23-P1P2	GTGGCTACACACTCCATGGC	2	Uts2b_-_27370363.23-P1P2|Uts2b_-_27370367.23-P1P2
Krcc1	P1P2	Krcc1_-_71271560.23-P1P2	GGGGCTAGAAAATTTCCCGA	1	Krcc1_+_71271464.23-P1P2	GTCCGTGTGGGTAGGAGCTT	2	Krcc1_-_71271560.23-P1P2|Krcc1_+_71271464.23-P1P2
Dock5	P1P2	Dock5_+_67933711.23-P1P2	GCTCGGCGGCGCAGCAGCCC	1	Dock5_-_67933762.23-P1P2	GAGGAGCTGGTGAGAGTCAC	2	Dock5_+_67933711.23-P1P2|Dock5_-_67933762.23-P1P2
Fsip2	P1P2	Fsip2_-_82943477.23-P1P2	GgggttggATAGTCTGAGGG	1	Fsip2_-_82943473.23-P1P2	GgggtgggttggATAGTCTG	2	Fsip2_-_82943477.23-P1P2|Fsip2_-_82943473.23-P1P2
Tmco5	P1P2	Tmco5_+_116878604.23-P1P2	GGGCAAGCAGCATGTCACCG	1	Tmco5_+_116878552.23-P1P2	GCCAGTGTTAGAACTTCTGT	2	Tmco5_+_116878604.23-P1P2|Tmco5_+_116878552.23-P1P2
Dnase1	P1P2	Dnase1_-_4037027.23-P1P2	GAGCCTGCCCAGGGCCCAAT	1	Dnase1_+_4036882.23-P1P2	GCTGCCCTCACTACCAGGGG	2	Dnase1_-_4037027.23-P1P2|Dnase1_+_4036882.23-P1P2
Gm3604	P1P2	Gm3604_+_62383283.23-P1P2	GACTCTAACCCTAAGGGAGG	1	Gm3604_-_62383741.23-P1P2	GGCATGGATTCCAATCACTA	2	Gm3604_+_62383283.23-P1P2|Gm3604_-_62383741.23-P1P2
Klf4	P1P2	Klf4_-_55532829.23-P1P2	GCTACTCGGGGTCCTCTGGG	1	Klf4_+_55532606.23-P1P2	GCCATGGCAACGCGCAGTGG	2	Klf4_-_55532829.23-P1P2|Klf4_+_55532606.23-P1P2
6330408A02Rik	P1P2	6330408A02Rik_+_13278610.23-P1P2	GAGGTCGTAAGGGTGACAGT	1	6330408A02Rik_+_13278620.23-P1P2	GTGAGCCTGCGAGGTCGTAA	2	6330408A02Rik_+_13278610.23-P1P2|6330408A02Rik_+_13278620.23-P1P2
Srsf2	P1P2	Srsf2_-_116853279.23-P1P2	GggAAAGCGCGCAGTCACTG	1	Srsf2_+_116853219.23-P1P2	Gtgcgcaggcgcacctggga	2	Srsf2_-_116853279.23-P1P2|Srsf2_+_116853219.23-P1P2
Pnpla1	P1P2	Pnpla1_+_28858301.23-P1P2	GGTGGGCTGCAGGATGGCTT	1	Pnpla1_-_28858373.23-P1P2	GAGGGGGCGTGGCGGATAGG	2	Pnpla1_+_28858301.23-P1P2|Pnpla1_-_28858373.23-P1P2
A930009A15Rik	P1P2	A930009A15Rik_-_115569993.23-P1P2	GAGGGGGGAGAGGCGGAAGC	1	A930009A15Rik_-_115569847.23-P1P2	GTAGTACAACAGTTTGGTTA	2	A930009A15Rik_-_115569993.23-P1P2|A930009A15Rik_-_115569847.23-P1P2
Fam163a	P1P2	Fam163a_+_156205178.23-P1P2	GGCGGGTTGGGGATTCTCTC	1	Fam163a_-_156205174.23-P1P2	GGCAGGTGATAGGAGCTAGA	2	Fam163a_+_156205178.23-P1P2|Fam163a_-_156205174.23-P1P2
Acsbg2	P1P2	Acsbg2_+_56874468.23-P1P2	GACGGCCAGTGATGTCATAA	1	Acsbg2_-_56874531.23-P1P2	GAGGAGAAAAGTACTCCCTG	2	Acsbg2_+_56874468.23-P1P2|Acsbg2_-_56874531.23-P1P2
Satb1	P1P2	Satb1_+_51832783.23-P1P2	GGCGCCGCGCTCTACACTGC	1	Satb1_+_51832831.23-P1P2	GGCCCCCGGCCAGCGTCGGG	2	Satb1_+_51832783.23-P1P2|Satb1_+_51832831.23-P1P2
Dcp1b	P1P2	Dcp1b_-_119175039.23-P1P2	GAAGAGCTCTGCAAAGGCGT	1	Dcp1b_+_119175147.23-P1P2	GTGGCCGGGTCCTCTCGCGG	2	Dcp1b_-_119175039.23-P1P2|Dcp1b_+_119175147.23-P1P2
Slc25a38	P1	Slc25a38_+_120110318.23-P1	GTCCGGTGACATAGCGTATC	1	Slc25a38_-_120110269.23-P1	GGCTCTGCAACTGAGAATCA	2	Slc25a38_+_120110318.23-P1|Slc25a38_-_120110269.23-P1
Olfr725	ENSMUST00000089844.2	Olfr725_+_50035635.23-ENSMUST00000089844.2	GTTCAAAGATGAGTAGTGGT	1	Olfr725_+_50035875.23-ENSMUST00000089844.2	GTCATGAAGAATTGAGTAGA	2	Olfr725_+_50035635.23-ENSMUST00000089844.2|Olfr725_+_50035875.23-ENSMUST00000089844.2
Gyk	P1P2	Gyk_+_85776643.23-P1P2	GCGGCCGGGCGGGAGTAAAG	1	Gyk_-_85776847.23-P1P2	GGGGCGGGGTCAACGCACGG	2	Gyk_+_85776643.23-P1P2|Gyk_-_85776847.23-P1P2
Bahd1	P1P2	Bahd1_-_118901359.23-P1P2	GGCAGGGCGGGGCGGCTGAT	1	Bahd1_-_118901323.23-P1P2	GGGGGAGCCGAGGGCCGGAT	2	Bahd1_-_118901359.23-P1P2|Bahd1_-_118901323.23-P1P2
Scp2d1	P1P2	Scp2d1_+_144823443.23-P1P2	GACAGGGCCGAAGGAGATCA	1	Scp2d1_+_144823574.23-P1P2	GAATCCTAAAATATGACGTA	2	Scp2d1_+_144823443.23-P1P2|Scp2d1_+_144823574.23-P1P2
Yars	P1P2	Yars_-_129189720.23-P1P2	GCCCTGAGAGGGTGCGTCAT	1	Yars_-_129189659.23-P1P2	GGCAGCGGGGCCAACACCAG	2	Yars_-_129189720.23-P1P2|Yars_-_129189659.23-P1P2
Fut4	P1P2	Fut4_+_14752107.23-P1P2	GGGGCTAGGAGAACAGTGTC	1	Fut4_-_14752326.23-P1P2	GCCTCCCCCAGAAGCCTCGA	2	Fut4_+_14752107.23-P1P2|Fut4_-_14752326.23-P1P2
Mfap5	P1P2	Mfap5_+_122513443.23-P1P2	GAGAAAGCAGTGTTACAATA	1	Mfap5_+_122513428.23-P1P2	GAATAAGGCTGGAATGAGAA	2	Mfap5_+_122513443.23-P1P2|Mfap5_+_122513428.23-P1P2
Map6d1	P1P2	Map6d1_-_20241477.23-P1P2	GCGAGAGCGAGGTCGGAAGG	1	Map6d1_-_20241470.23-P1P2	GGCTTCATCGAGAGCGAGGT	2	Map6d1_-_20241477.23-P1P2|Map6d1_-_20241470.23-P1P2
2410012M07Rik	P1P2	2410012M07Rik_-_98864744.23-P1P2	GGGCCAGCCTGACACTCCTG	1	2410012M07Rik_-_98864563.23-P1P2	GTTAACGGAGTGTGGTTTGG	2	2410012M07Rik_-_98864744.23-P1P2|2410012M07Rik_-_98864563.23-P1P2
Slc13a3	P1P2	Slc13a3_-_165473352.23-P1P2	GCCCCACTCTGGACTCACGT	1	Slc13a3_-_165473360.23-P1P2	GTGGACTCACGTGGGAAATG	2	Slc13a3_-_165473352.23-P1P2|Slc13a3_-_165473360.23-P1P2
Mrgprb4	ENSMUST00000094388.1	Mrgprb4_-_48199405.23-ENSMUST00000094388.1	GTGCAGACCTATATGATATG	1	Mrgprb4_+_48199390.23-ENSMUST00000094388.1	GCAACTACCCCATATCATAT	2	Mrgprb4_-_48199405.23-ENSMUST00000094388.1|Mrgprb4_+_48199390.23-ENSMUST00000094388.1
Vmn1r63	ENSMUST00000075085.6	Vmn1r63_-_5805512.23-ENSMUST00000075085.6	GCTCATAAAGGGGGAGTGCC	1	Vmn1r63_-_5805500.23-ENSMUST00000075085.6	GAATGAATCAGAGCTCATAA	2	Vmn1r63_-_5805512.23-ENSMUST00000075085.6|Vmn1r63_-_5805500.23-ENSMUST00000075085.6
Enkur	P1P2	Enkur_-_21205652.23-P1P2	GCGGAGGTGGAGCGATCGAC	1	Enkur_-_21205658.23-P1P2	GTGGAGCGATCGACGGGGAA	2	Enkur_-_21205652.23-P1P2|Enkur_-_21205658.23-P1P2
Alg6	P1P2	Alg6_+_99715585.23-P1P2	GGAGCGAGCCCGTAAGGCGA	1	Alg6_+_99715553.23-P1P2	GTGGGCGGAGTCATCGTGGA	2	Alg6_+_99715585.23-P1P2|Alg6_+_99715553.23-P1P2
Cebpb	P1P2	Cebpb_-_167688399.23-P1P2	GGGGCCATACATAGGGTGGA	1	Cebpb_-_167688576.23-P1P2	GGGACAGCGGGCAGGATCCG	2	Cebpb_-_167688399.23-P1P2|Cebpb_-_167688576.23-P1P2
Il13ra1	P1P2	Il13ra1_-_36111976.23-P1P2	GGAGGCCAGGTGTCACTCGG	1	Il13ra1_+_36112023.23-P1P2	GCGAGCGCGCGGGGGCGTCT	2	Il13ra1_-_36111976.23-P1P2|Il13ra1_+_36112023.23-P1P2
Efna4	P1P2	Efna4_+_89338196.23-P1P2	GAGCACAGTGAGATAACAAA	1	Efna4_+_89338100.23-P1P2	GGGCGGAGACAAGTTTTCAT	2	Efna4_+_89338196.23-P1P2|Efna4_+_89338100.23-P1P2
Nudt18	P1P2	Nudt18_-_70577686.23-P1P2	GCTAGGGAGAGTGTGAAGTG	1	Nudt18_-_70577552.23-P1P2	GTGGGCTTCCGTAATGTCAT	2	Nudt18_-_70577686.23-P1P2|Nudt18_-_70577552.23-P1P2
Serpinb6a	P1P2	Serpinb6a_-_33936076.23-P1P2	GGCCGCTCCCGAGTAGGAAA	1	Serpinb6a_-_33936092.23-P1P2	GAAAAGGAAGAGAGTAAGTA	2	Serpinb6a_-_33936076.23-P1P2|Serpinb6a_-_33936092.23-P1P2
2300003K06Rik	P1P2	2300003K06Rik_+_99838209.23-P1P2	GAGATAAGCCTTAATCCAGA	1	2300003K06Rik_-_99838275.23-P1P2	GAGCACAATCATCATGGTTC	2	2300003K06Rik_+_99838209.23-P1P2|2300003K06Rik_-_99838275.23-P1P2
Vmn2r1	ENSMUST00000029406.4	Vmn2r1_-_64081551.23-ENSMUST00000029406.4	GAGTGACAAGCCAAGTCCAC	1	Vmn2r1_-_64081456.23-ENSMUST00000029406.4	GTTGTTCTCAAAGGGTTACT	2	Vmn2r1_-_64081551.23-ENSMUST00000029406.4|Vmn2r1_-_64081456.23-ENSMUST00000029406.4
Lrp4	P1P2	Lrp4_-_91457311.23-P1P2	GCGGAAGGCTAGGAATGTTA	1	Lrp4_-_91457360.23-P1P2	Gcaagaggcacaggcgggtg	2	Lrp4_-_91457311.23-P1P2|Lrp4_-_91457360.23-P1P2
Olfr1510	ENSMUST00000079459.2	Olfr1510_-_52411061.23-ENSMUST00000079459.2	GTGGGGGAAAAATTACCCAG	1	Olfr1510_-_52411105.23-ENSMUST00000079459.2	GGGAACCTCTTGTTCAGTGA	2	Olfr1510_-_52411061.23-ENSMUST00000079459.2|Olfr1510_-_52411105.23-ENSMUST00000079459.2
Edn2	P1P2	Edn2_+_120161262.23-P1P2	GCGCCCTGGCCTCCCGGTGA	1	Edn2_-_120161152.23-P1P2	GGGGCCGGGTACCACAACTT	2	Edn2_+_120161262.23-P1P2|Edn2_-_120161152.23-P1P2
Klrk1	P1P2	Klrk1_-_129622933.23-P1P2	GACAGCTCATCCAAGACAGG	1	Klrk1_+_129622751.23-P1P2	GACAGAAATTAGGACAGATT	2	Klrk1_-_129622933.23-P1P2|Klrk1_+_129622751.23-P1P2
Gpn1	P1P2	Gpn1_+_31494499.23-P1P2	GCACAAGTGAGGGGTAGTGT	1	Gpn1_-_31494603.23-P1P2	GCCACTGCAGTAGGTTCGAG	2	Gpn1_+_31494499.23-P1P2|Gpn1_-_31494603.23-P1P2
Gpd2	P1P2	Gpd2_+_57238347.23-P1P2	GTGCGCCTCCGCCTCCCCGG	1	Gpd2_+_57238285.23-P1P2	GCGGCCCGGGCGACTCTGCC	2	Gpd2_+_57238347.23-P1P2|Gpd2_+_57238285.23-P1P2
Eci1	P1P2	Eci1_+_24426573.23-P1P2	GCCGCAGCGTCCAGAGGACT	1	Eci1_+_24426548.23-P1P2	GCCCCTGTGCCAGTTAGGGC	2	Eci1_+_24426573.23-P1P2|Eci1_+_24426548.23-P1P2
Serpina3a	P1P2	Serpina3a_-_104112222.23-P1P2	Ggcaagggataagaggggag	1	Serpina3a_+_104112265.23-P1P2	Gttacatgtgtgtacagcct	2	Serpina3a_-_104112222.23-P1P2|Serpina3a_+_104112265.23-P1P2
G6pc3	P1P2	G6pc3_-_102189551.23-P1P2	GAGCTGGTTCCCAGGTTCAT	1	G6pc3_+_102189538.23-P1P2	GTCAGGGGACCGATGAACCT	2	G6pc3_-_102189551.23-P1P2|G6pc3_+_102189538.23-P1P2
Prr12	P1P2	Prr12_-_45053207.23-P1P2	GGGGACGCGCGCTCCGGAGG	1	Prr12_-_45053514.23-P1P2	GAGCGCACCAGCGGAGCCTG	2	Prr12_-_45053207.23-P1P2|Prr12_-_45053514.23-P1P2
Qrsl1	P1P2	Qrsl1_+_43901903.23-P1P2	GCAAGCAGGGAGTCCTCAGA	1	Qrsl1_-_43901846.23-P1P2	GCGGACAGGCAAGGAGACCG	2	Qrsl1_+_43901903.23-P1P2|Qrsl1_-_43901846.23-P1P2
Slc29a3	P1	Slc29a3_+_60752854.23-P1	GAACCCGGAAGCGCTGAACG	1	Slc29a3_+_60753011.23-P1	GGGCACCCTAGGGAATGAGG	2	Slc29a3_+_60752854.23-P1|Slc29a3_+_60753011.23-P1
Glyctk	P1P2	Glyctk_+_106158267.23-P1P2	GGGGCACTGCCGTGGTGTGA	1	Glyctk_-_106158456.23-P1P2	GAAGCTGGGTCCATGTGGAA	2	Glyctk_+_106158267.23-P1P2|Glyctk_-_106158456.23-P1P2
Cyb5r2	P1P2	Cyb5r2_+_107758160.23-P1P2	GAGCAGAGGGATCCCTGCAT	1	Cyb5r2_-_107758137.23-P1P2	GCTTCTGCAGCTGGCCGGGT	2	Cyb5r2_+_107758160.23-P1P2|Cyb5r2_-_107758137.23-P1P2
Glb1l3	P1P2	Glb1l3_+_26861203.23-P1P2	Gggagcaaaaggaagggcac	1	Glb1l3_-_26860996.23-P1P2	GCACAACACAAAGATCAGAG	2	Glb1l3_+_26861203.23-P1P2|Glb1l3_-_26860996.23-P1P2
Peg3	P1P2	Peg3_-_6730639.23-P1P2	GCCCAAGCAGAGTCTGGAAA	1	Peg3_-_6730600.23-P1P2	GGGCACGGAGTTGACGTCAA	2	Peg3_-_6730639.23-P1P2|Peg3_-_6730600.23-P1P2
Gnmt	P1	Gnmt_-_46729351.23-P1	GTTAGTAAGACAGGTCAGAT	1	Gnmt_-_46729303.23-P1	GGCTGCCTCTGCCTTGAGGA	2	Gnmt_-_46729351.23-P1|Gnmt_-_46729303.23-P1
Inip	P1P2	Inip_-_59783996.23-P1P2	GCGAAGAATGACAGTCGAAG	1	Inip_+_59784014.23-P1P2	GGGCTCCGCCCCCAATTGTA	2	Inip_-_59783996.23-P1P2|Inip_+_59784014.23-P1P2
Fam188b	P1P2	Fam188b_-_55203320.23-P1P2	GAGCAACTGGCAGAGAGTAG	1	Fam188b_-_55203271.23-P1P2	GCTCGGCGCCCAGAACTCAT	2	Fam188b_-_55203320.23-P1P2|Fam188b_-_55203271.23-P1P2
Ccdc17	P1	Ccdc17_-_116597476.23-P1	GACAGCGTGGCGGGACCCAA	1	Ccdc17_+_116597595.23-P1	GCTGGGCCGGCAACTCACCG	2	Ccdc17_-_116597476.23-P1|Ccdc17_+_116597595.23-P1
H2-Eb1	P1P2	H2-Eb1_+_34305795.23-P1P2	GGGGAGCCAATCAGCATCAA	1	H2-Eb1_-_34305693.23-P1P2	Ggtgctgggatatgaggcat	2	H2-Eb1_+_34305795.23-P1P2|H2-Eb1_-_34305693.23-P1P2
Ifrd2	P1P2	Ifrd2_-_107587529.23-P1P2	GTGGGTACGCAGGGCATTGT	1	Ifrd2_-_107587571.23-P1P2	GGCGTCGGCTTATGTGTCTC	2	Ifrd2_-_107587529.23-P1P2|Ifrd2_-_107587571.23-P1P2
Bag5	P1P2	Bag5_-_111713192.23-P1P2	GccgcccggcgTCCGTCCCA	1	Bag5_+_111713260.23-P1P2	GTACGGCAGGATCGCGACAG	2	Bag5_-_111713192.23-P1P2|Bag5_+_111713260.23-P1P2
Cyp4a31	P1P2	Cyp4a31_+_115563618.23-P1P2	GTACCTGTGGGAGAATGGTG	1	Cyp4a31_+_115563235.23-P1P2	GGAAGTCCCGTGTGATATGG	2	Cyp4a31_+_115563618.23-P1P2|Cyp4a31_+_115563235.23-P1P2
Gkn3	P1P2	Gkn3_-_87389048.23-P1P2	GAATAGCTCGGCAGGTTCCA	1	Gkn3_+_87388993.23-P1P2	GAACACTCGGATCTAGTAAA	2	Gkn3_-_87389048.23-P1P2|Gkn3_+_87388993.23-P1P2
Ankrd61	P1P2	Ankrd61_+_143895294.23-P1P2	GAATGAGGGAAcaaaatctc	1	Ankrd61_+_143895458.23-P1P2	Gctcaagtgctcattcttgg	2	Ankrd61_+_143895294.23-P1P2|Ankrd61_+_143895458.23-P1P2
Olfr259	ENSMUST00000099862.1	Olfr259_-_87108515.23-ENSMUST00000099862.1	GACACTGAGTGGTTGCCCTG	1	Olfr259_+_87108488.23-ENSMUST00000099862.1	GGGCAACCACTCAGTGTATG	2	Olfr259_-_87108515.23-ENSMUST00000099862.1|Olfr259_+_87108488.23-ENSMUST00000099862.1
Olfr287	P1P2	Olfr287_+_98221156.23-P1P2	GCATGAGCCTGGCCTCACAA	1	Olfr287_+_98221098.23-P1P2	GCCCAGGGACACACTTGGAA	2	Olfr287_+_98221156.23-P1P2|Olfr287_+_98221098.23-P1P2
Nup160	P1P2	Nup160_+_90679080.23-P1P2	GGGCGGGGAAGAGGCCTGAC	1	Nup160_-_90679225.23-P1P2	GCCGAAGTGACCGCGAGTCA	2	Nup160_+_90679080.23-P1P2|Nup160_-_90679225.23-P1P2
Olfr70	ENSMUST00000055545.3	Olfr70_+_43700918.23-ENSMUST00000055545.3	GTGGTCCCTGGAAAGGGAGA	1	Olfr70_+_43700900.23-ENSMUST00000055545.3	GAAGGCAGGCTGTGTGACAG	2	Olfr70_+_43700918.23-ENSMUST00000055545.3|Olfr70_+_43700900.23-ENSMUST00000055545.3
Zfp629	P1P2	Zfp629_-_127615356.23-P1P2	GAGCCTGGGAAAAAATGAGG	1	Zfp629_-_127615418.23-P1P2	GCCAGTGTCTAGTGGAATCA	2	Zfp629_-_127615356.23-P1P2|Zfp629_-_127615418.23-P1P2
Vmn1r19	ENSMUST00000089830.2	Vmn1r19_+_57404010.23-ENSMUST00000089830.2	Gctgtaacatggaatgttgg	1	Vmn1r19_+_57404013.23-ENSMUST00000089830.2	Gtgcctgtaacatggaatgt	2	Vmn1r19_+_57404010.23-ENSMUST00000089830.2|Vmn1r19_+_57404013.23-ENSMUST00000089830.2
Ccdc134	P1P2	Ccdc134_-_82127870.23-P1P2	GGGGCCGGAAGTGAGGTCAG	1	Ccdc134_-_82127796.23-P1P2	GCCGGGCGACGGCTTCTCCC	2	Ccdc134_-_82127870.23-P1P2|Ccdc134_-_82127796.23-P1P2
Olfr420	ENSMUST00000068403.3	Olfr420_+_174158525.23-ENSMUST00000068403.3	Gagcacaaatcagaattaat	1	Olfr420_+_174158448.23-ENSMUST00000068403.3	Ggtagaacctgaaaatttgc	2	Olfr420_+_174158525.23-ENSMUST00000068403.3|Olfr420_+_174158448.23-ENSMUST00000068403.3
Zfp600	ENSMUST00000092750.5	Zfp600_+_146157201.23-ENSMUST00000092750.5	GcccttccGGTATTCCAGAA	1	Zfp600_-_146157209.23-ENSMUST00000092750.5	GCTGGACCCTTGGCCCTTTC	2	Zfp600_+_146157201.23-ENSMUST00000092750.5|Zfp600_-_146157209.23-ENSMUST00000092750.5
Bcl2	P1P2	Bcl2_-_106714321.23-P1P2	Gaggacgggccggggaggaa	1	Bcl2_+_106714347.23-P1P2	GCGGCGGAGAATGAAGTAAG	2	Bcl2_-_106714321.23-P1P2|Bcl2_+_106714347.23-P1P2
Itih1	P1P2	Itih1_+_30943423.23-P1P2	GGCATGGCACCTACCAACAA	1	Itih1_-_30943377.23-P1P2	GGAGGCAAATAGCAGGGTTT	2	Itih1_+_30943423.23-P1P2|Itih1_-_30943377.23-P1P2
Mrpl19	P1P2	Mrpl19_+_81965852.23-P1P2	GCGTCCGAATGGCCAGGCCA	1	Mrpl19_-_81965993.23-P1P2	GATGGGGTGTGGCCGGACGG	2	Mrpl19_+_81965852.23-P1P2|Mrpl19_-_81965993.23-P1P2
Capn6	P1P2	Capn6_+_143827430.23-P1P2	GTGAGTGCTGGGCGGGGCAA	1	Capn6_-_143827511.23-P1P2	GGCCCTGCCAGATGTGCAGA	2	Capn6_+_143827430.23-P1P2|Capn6_-_143827511.23-P1P2
Mrpl14	P2	Mrpl14_-_45695223.23-P2	GTGGCCCTCTCGGGAAGTTG	1	Mrpl14_-_45695183.23-P2	GAAGGCGCCGGGGTCAAGAA	2	Mrpl14_-_45695223.23-P2|Mrpl14_-_45695183.23-P2
Slc35d2	P1P2	Slc35d2_-_64129542.23-P1P2	GTTAGCCGGCACCCCCAGAA	1	Slc35d2_-_64129365.23-P1P2	GGTCCCGCCCCCAGCGGCCC	2	Slc35d2_-_64129542.23-P1P2|Slc35d2_-_64129365.23-P1P2
Olfr209	ENSMUST00000055868.3	Olfr209_-_59362343.23-ENSMUST00000055868.3	GTGCTCCACAATTCACAGTT	1	Olfr209_-_59362524.23-ENSMUST00000055868.3	GCTGTCATAAATTATGTATG	2	Olfr209_-_59362343.23-ENSMUST00000055868.3|Olfr209_-_59362524.23-ENSMUST00000055868.3
Calr3	P2	Calr3_-_72435161.23-P2	Gactcccacaacagagcact	1	Calr3_-_72435200.23-P2	Gtgtcaaccctggccagcct	2	Calr3_-_72435161.23-P2|Calr3_-_72435200.23-P2
Large	P1P2	Large_+_73353685.23-P1P2	GGAGGGAGGCGCTTGGTCGT	1	Large_-_73353782.23-P1P2	GGGGCCGGGTCTCGGGAAAA	2	Large_+_73353685.23-P1P2|Large_-_73353782.23-P1P2
Senp6	P1P2	Senp6_-_80066844.23-P1P2	GGGGCGAGCAGGGACCCGAA	1	Senp6_-_80066822.23-P1P2	GGGGTTCGGCCGAGCCCGGA	2	Senp6_-_80066844.23-P1P2|Senp6_-_80066822.23-P1P2
Arl13a	P1P2	Arl13a_+_134187177.23-P1P2	GAGTACATATAGAatgtact	1	Arl13a_-_134187465.23-P1P2	GGTTGCTAAGAACTAGCAAG	2	Arl13a_+_134187177.23-P1P2|Arl13a_-_134187465.23-P1P2
Terf2ip	P1P2	Terf2ip_-_112011136.23-P1P2	GACCCCAGGCACAGTCGCCT	1	Terf2ip_+_112011380.23-P1P2	GCGCCTGCGCAGCGAGAGTC	2	Terf2ip_-_112011136.23-P1P2|Terf2ip_+_112011380.23-P1P2
Ndufb10	P1P2	Ndufb10_+_24724500.23-P1P2	GAGAGCGCTGGGGACCACAA	1	Ndufb10_-_24724619.23-P1P2	GGCAGGGAATATGGTGAACA	2	Ndufb10_+_24724500.23-P1P2|Ndufb10_-_24724619.23-P1P2
Plekha4	P2	Plekha4_-_45526019.23-P2	GGGGCTGCACGTCACCCCGG	1	Plekha4_+_45526227.23-P2	GAAAGCCGCGTGGACGATGT	2	Plekha4_-_45526019.23-P2|Plekha4_+_45526227.23-P2
Psenen	P1P2	Psenen_-_30563339.23-P1P2	GACGCAAGGAGCAGGCGCGT	1	Psenen_-_30563429.23-P1P2	GGTGAAGGGAGTAGCCTCTC	2	Psenen_-_30563339.23-P1P2|Psenen_-_30563429.23-P1P2
D6Ertd527e	P1P2	D6Ertd527e_-_87104338.23-P1P2	GGCTGTGAGTCACATGACTC	1	D6Ertd527e_-_87104636.23-P1P2	Ggaaaactgctcaccagatt	2	D6Ertd527e_-_87104338.23-P1P2|D6Ertd527e_-_87104636.23-P1P2
Styxl1	P1P2	Styxl1_+_135778508.23-P1P2	GCTGACGTCACGATTCTCTC	1	Styxl1_-_135778551.23-P1P2	GGCCTCGCTCGCCGGGTCTA	2	Styxl1_+_135778508.23-P1P2|Styxl1_-_135778551.23-P1P2
Gpr20	P1P2	Gpr20_+_73707475.23-P1P2	GAGGCCAGCAGGGGTTGGGA	1	Gpr20_+_73707582.23-P1P2	GTCACCCCTCTGTCTAGGGA	2	Gpr20_+_73707475.23-P1P2|Gpr20_+_73707582.23-P1P2
Pde8b	P1	Pde8b_+_95250400.23-P1	GCAGCTATGCGACTCAAAGT	1	Pde8b_-_95250468.23-P1	GACGCCTTCCTAGAACTCTT	2	Pde8b_+_95250400.23-P1|Pde8b_-_95250468.23-P1
Plagl1	P1P2	Plagl1_+_13090574.23-P1P2	GCAGCCCAGCGGTGACTCAT	1	Plagl1_-_13090637.23-P1P2	GGACCCCCGGAGCCCCAACG	2	Plagl1_+_13090574.23-P1P2|Plagl1_-_13090637.23-P1P2
Armcx1	P1P2	Armcx1_-_134717855.23-P1P2	GGGACCTGGTGTGGCGGGGA	1	Armcx1_+_134717962.23-P1P2	GGTAGACCAGAATTAGGAGG	2	Armcx1_-_134717855.23-P1P2|Armcx1_+_134717962.23-P1P2
Cbfa2t2	P1P2	Cbfa2t2_-_154436284.23-P1P2	GGCCACGCATAGCGCGCGGG	1	Cbfa2t2_-_154436337.23-P1P2	GACGCAGCCTGGCGCGGAAG	2	Cbfa2t2_-_154436284.23-P1P2|Cbfa2t2_-_154436337.23-P1P2
Tbc1d9	P1P2	Tbc1d9_-_83165347.23-P1P2	GTTAGCGCGTGACTTGATCC	1	Tbc1d9_-_83165317.23-P1P2	GGAAGGGGAGTGGCCACCGG	2	Tbc1d9_-_83165347.23-P1P2|Tbc1d9_-_83165317.23-P1P2
Sirpb1b	ENSMUST00000091319.4	Sirpb1b_-_15575359.23-ENSMUST00000091319.4	GACACATAAAGTTCTAAGTT	1	Sirpb1b_-_15575612.23-ENSMUST00000091319.4	GTAtcttagcccatctgtaa	2	Sirpb1b_-_15575359.23-ENSMUST00000091319.4|Sirpb1b_-_15575612.23-ENSMUST00000091319.4
Zdhhc11	P1P2	Zdhhc11_+_73963675.23-P1P2	GCACAGGTGGGGACTCCGAA	1	Zdhhc11_+_73963735.23-P1P2	GAATAGAGGTGTATGGCTAG	2	Zdhhc11_+_73963675.23-P1P2|Zdhhc11_+_73963735.23-P1P2
Urb1	P1P2	Urb1_-_90810540.23-P1P2	GGGAGAAGGTAGAACACCTG	1	Urb1_-_90810567.23-P1P2	GGCCTTCTGGGGCGTGTCTC	2	Urb1_-_90810540.23-P1P2|Urb1_-_90810567.23-P1P2
Obox3	ENSMUST00000095217.4	Obox3_-_15640326.23-ENSMUST00000095217.4	Gatttaaccacaggatttca	1	Obox3_+_15640083.23-ENSMUST00000095217.4	Gaaagacccagggtgtgggg	2	Obox3_-_15640326.23-ENSMUST00000095217.4|Obox3_+_15640083.23-ENSMUST00000095217.4
Tcte2	P1P2	Tcte2_-_13761500.23-P1P2	GCTAGCCCGGCGGGGTCCGG	1	Tcte2_-_13761592.23-P1P2	GAAGCGTTCTGGACGATCTT	2	Tcte2_-_13761500.23-P1P2|Tcte2_-_13761592.23-P1P2
Xrcc5	P1P2	Xrcc5_+_72307430.23-P1P2	GTGCAAGGCGGGGAAGCCAT	1	Xrcc5_-_72307400.23-P1P2	GAACAAAGCCTTGCCTAAGG	2	Xrcc5_+_72307430.23-P1P2|Xrcc5_-_72307400.23-P1P2
Tex12	P1P2	Tex12_-_50561509.23-P1P2	GTCAAAGCGGGTCTTTGGGA	1	Tex12_+_50561398.23-P1P2	GGAAAAAGGCGGGAAGTAAA	2	Tex12_-_50561509.23-P1P2|Tex12_+_50561398.23-P1P2
Tmem204	P1P2	Tmem204_-_25081324.23-P1P2	GAGGCCTGGGGAGACTTCAG	1	Tmem204_+_25081368.23-P1P2	GCATCCCTGACTATTCCTAT	2	Tmem204_-_25081324.23-P1P2|Tmem204_+_25081368.23-P1P2
Gabrq	P1P2	Gabrq_-_72825052.23-P1P2	GTGACTGCGCGCAGCCTGAG	1	Gabrq_-_72825055.23-P1P2	GCTGCGCGCAGCCTGAGGGG	2	Gabrq_-_72825052.23-P1P2|Gabrq_-_72825055.23-P1P2
Kif22	P1P2	Kif22_-_127042610.23-P1P2	GACTAAATGGTCAGTAACTG	1	Kif22_+_127042523.23-P1P2	GACCGGAAGTGAGCCCGAGA	2	Kif22_-_127042610.23-P1P2|Kif22_+_127042523.23-P1P2
Cbr3	P1P2	Cbr3_+_93683044.23-P1P2	GGCGCTGCTCCCAAAGGAAG	1	Cbr3_-_93683158.23-P1P2	GgggAGGAGGCGGACCCTTC	2	Cbr3_+_93683044.23-P1P2|Cbr3_-_93683158.23-P1P2
Rgl1	ENSMUST00000111859.1	Rgl1_+_152766497.23-ENSMUST00000111859.1	GCGGGAGCGCGCGTCGGCAG	1	Rgl1_-_152766645.23-ENSMUST00000111859.1	GGACGCCCCAGAGCGGAAGA	2	Rgl1_+_152766497.23-ENSMUST00000111859.1|Rgl1_-_152766645.23-ENSMUST00000111859.1
Zscan25	ENSMUST00000094116.3	Zscan25_-_145283260.23-ENSMUST00000094116.3	GAAGCCCAAGCCAGTTGATA	1	Zscan25_+_145283242.23-ENSMUST00000094116.3	GAAACCCTATCAACTGGCTT	2	Zscan25_-_145283260.23-ENSMUST00000094116.3|Zscan25_+_145283242.23-ENSMUST00000094116.3
Zfp182	P1P2	Zfp182_-_21062151.23-P1P2	GCGCAGGCGCAGAGGGTAGT	1	Zfp182_-_21062143.23-P1P2	GAGGCTCAACGCAGGCGCAG	2	Zfp182_-_21062151.23-P1P2|Zfp182_-_21062143.23-P1P2
Dpep3	P1P2	Dpep3_+_105979493.23-P1P2	GGGGGCGCCCTTCTACTTGG	1	Dpep3_-_105979570.23-P1P2	GTCAACTACCTCATTGTTTG	2	Dpep3_+_105979493.23-P1P2|Dpep3_-_105979570.23-P1P2
Nr1h4	P1	Nr1h4_+_89506813.23-P1	GTTACCCTCAAAAAATTCTT	1	Nr1h4_+_89506849.23-P1	GGACCTCCAGCCAGTCTTAG	2	Nr1h4_+_89506813.23-P1|Nr1h4_+_89506849.23-P1
Hdac11	P1P2	Hdac11_+_91156646.23-P1P2	GCAATGGAGTGCCGCCTGGA	1	Hdac11_-_91156628.23-P1P2	GTCTACCCTGGGAATGCGGG	2	Hdac11_+_91156646.23-P1P2|Hdac11_-_91156628.23-P1P2
Mdh1b	P1P2	Mdh1b_+_63730544.23-P1P2	GAGGCCATGTGCAAATAGGG	1	Mdh1b_+_63730547.23-P1P2	GCGGAGGCCATGTGCAAATA	2	Mdh1b_+_63730544.23-P1P2|Mdh1b_+_63730547.23-P1P2
Sae1	P1P2	Sae1_-_16387932.23-P1P2	GTCGCTGCCCCATCACGTGA	1	Sae1_+_16387828.23-P1P2	GCAGGCGCGGCTCTCTGCGC	2	Sae1_-_16387932.23-P1P2|Sae1_+_16387828.23-P1P2
Trim47	P1P2	Trim47_+_116110432.23-P1P2	GCTGGGTAGAAGTCTCAAGA	1	Trim47_-_116110532.23-P1P2	GAGAATGTGAGGGGATTCAT	2	Trim47_+_116110432.23-P1P2|Trim47_-_116110532.23-P1P2
Ogfod2	P1P2	Ogfod2_-_124112142.23-P1P2	GTCACCCCGCTGTGACTCGG	1	Ogfod2_+_124112151.23-P1P2	GGTGTCCCCAGCACGGGGTA	2	Ogfod2_-_124112142.23-P1P2|Ogfod2_+_124112151.23-P1P2
Rarg	P1	Rarg_-_102246715.23-P1	GTGCACGCACATATATTCAT	1	Rarg_-_102246833.23-P1	GCGTGCCCAGGTGGGGATTG	2	Rarg_-_102246715.23-P1|Rarg_-_102246833.23-P1
Cdh23	P1P2	Cdh23_+_60687383.23-P1P2	GGGACTGGCGACGGGGAACG	1	Cdh23_-_60687463.23-P1P2	GAAGGTGCCTGCACTGGCCG	2	Cdh23_+_60687383.23-P1P2|Cdh23_-_60687463.23-P1P2
Cpne9	P1P2	Cpne9_-_113282121.23-P1P2	GGATGAGCGCTGCTCAGAAT	1	Cpne9_+_113282238.23-P1P2	GGAGCAGCCTGGAGCTAGTC	2	Cpne9_-_113282121.23-P1P2|Cpne9_+_113282238.23-P1P2
Ide	P1P2	Ide_+_37338279.23-P1P2	Gaatgtggtgagtaggtctg	1	Ide_+_37337912.23-P1P2	GACTAGGCTTATGCTAATGA	2	Ide_+_37338279.23-P1P2|Ide_+_37337912.23-P1P2
CALM5	ENSMUST00000184271.1	CALM5_-_3854051.23-ENSMUST00000184271.1	GCTGGGAGGAGCATCATGCC	1	CALM5_-_3854054.23-ENSMUST00000184271.1	GGGAGGAGCATCATGCCTGG	2	CALM5_-_3854051.23-ENSMUST00000184271.1|CALM5_-_3854054.23-ENSMUST00000184271.1
Nusap1	P1P2	Nusap1_+_119618542.23-P1P2	GTATTGAGAGCGTGTCTTTC	1	Nusap1_-_119618533.23-P1P2	GTGTCTCCCTGCGTCTTCAT	2	Nusap1_+_119618542.23-P1P2|Nusap1_-_119618533.23-P1P2
1700019D03Rik	P1P2	1700019D03Rik_-_52953012.23-P1P2	GTACCCCTGCCCAACAGCAT	1	1700019D03Rik_+_52952965.23-P1P2	GCTGGCGGTGCCAACACTGA	2	1700019D03Rik_-_52953012.23-P1P2|1700019D03Rik_+_52952965.23-P1P2
Ufm1	P1P2	Ufm1_-_53863899.23-P1P2	GGGAGCTCACAGGCTACAGA	1	Ufm1_-_53864083.23-P1P2	GGCTGGTTACGGCGGAAGTA	2	Ufm1_-_53863899.23-P1P2|Ufm1_-_53864083.23-P1P2
Kcnc2	P1P2	Kcnc2_-_112270659.23-P1P2	GGGGAGAAGCTGGAAACAGG	1	Kcnc2_+_112270674.23-P1P2	GCTGAGGGAGGCACACCCCC	2	Kcnc2_-_112270659.23-P1P2|Kcnc2_+_112270674.23-P1P2
Hsd3b6	P1P2	Hsd3b6_+_98814602.23-P1P2	GCCCAACCTGGTCCTGACAT	1	Hsd3b6_+_98814769.23-P1P2	GGGCTCCCCACAGACTTATG	2	Hsd3b6_+_98814602.23-P1P2|Hsd3b6_+_98814769.23-P1P2
Hist1h1a	P1P2	Hist1h1a_-_23763529.23-P1P2	GTAGGTCGGTGGAATCGCAA	1	Hist1h1a_-_23763515.23-P1P2	GCAAAAACACGAAGCTAGGT	2	Hist1h1a_-_23763529.23-P1P2|Hist1h1a_-_23763515.23-P1P2
Gemin8	P1P2	Gemin8_+_166170323.23-P1P2	GAGTGGCTACACAGAGTCAA	1	Gemin8_+_166170314.23-P1P2	GACAGAGTCAAGGGCGGCAC	2	Gemin8_+_166170323.23-P1P2|Gemin8_+_166170314.23-P1P2
Fos	P1P2	Fos_+_85473804.23-P1P2	GTCACTGGGCGGAACTGGAA	1	Fos_+_85473504.23-P1P2	GAACTCTGAGGGTGCAGCGC	2	Fos_+_85473804.23-P1P2|Fos_+_85473504.23-P1P2
A630033H20Rik	P1P2	A630033H20Rik_-_107149463.23-P1P2	GTTGCCCACAATATCCTCTG	1	A630033H20Rik_-_107149351.23-P1P2	GAGACAACGACTGTAATACG	2	A630033H20Rik_-_107149463.23-P1P2|A630033H20Rik_-_107149351.23-P1P2
Rtp3	P1P2	Rtp3_-_110989938.23-P1P2	GGCAGAGTCTCTGAAAGGGC	1	Rtp3_+_110990025.23-P1P2	GCCAGAGTGTGGGACTCCCA	2	Rtp3_-_110989938.23-P1P2|Rtp3_+_110990025.23-P1P2
Tmc5	ENSMUST00000057320.7	Tmc5_+_118633638.23-ENSMUST00000057320.7	GGACCTGTAACCACAGGACA	1	Tmc5_-_118633501.23-ENSMUST00000057320.7	Gtcaaggaaaactttgagga	2	Tmc5_+_118633638.23-ENSMUST00000057320.7|Tmc5_-_118633501.23-ENSMUST00000057320.7
Figla	P1P2	Figla_+_86017093.23-P1P2	GGGCATGAGCTGAGGAGGGG	1	Figla_+_86017097.23-P1P2	GGCGGGGCATGAGCTGAGGA	2	Figla_+_86017093.23-P1P2|Figla_+_86017097.23-P1P2
Kif3b	P1P2	Kif3b_-_153291290.23-P1P2	GTGTCCGCGCGCTGGGAACC	1	Kif3b_+_153291307.23-P1P2	GCTCGCCGAGGGGCGGAACC	2	Kif3b_-_153291290.23-P1P2|Kif3b_+_153291307.23-P1P2
Tap2	P1P2	Tap2_+_34204367.23-P1P2	GGCTACTAGCAAAACTCTTG	1	Tap2_+_34204405.23-P1P2	GGCGCCCCAGGTTCCCAAAA	2	Tap2_+_34204367.23-P1P2|Tap2_+_34204405.23-P1P2
Olfr853	ENSMUST00000058296.3	Olfr853_+_19538031.23-ENSMUST00000058296.3	GTACAAAGACCAGAAGTAGA	1	Olfr853_+_19538202.23-ENSMUST00000058296.3	GGAACATAAAATATCAACTA	2	Olfr853_+_19538031.23-ENSMUST00000058296.3|Olfr853_+_19538202.23-ENSMUST00000058296.3
Vmn1r37	ENSMUST00000077482.1	Vmn1r37_-_66731193.23-ENSMUST00000077482.1	Gtgagggaggatggaatact	1	Vmn1r37_-_66731130.23-ENSMUST00000077482.1	Gaattccaaagatgggaggt	2	Vmn1r37_-_66731193.23-ENSMUST00000077482.1|Vmn1r37_-_66731130.23-ENSMUST00000077482.1
Foxr1	P1P2	Foxr1_-_44441276.23-P1P2	GTCTCTGGGTGGGTGAGCTA	1	Foxr1_-_44441261.23-P1P2	GgctcgaGGGGGTGTATCTC	2	Foxr1_-_44441276.23-P1P2|Foxr1_-_44441261.23-P1P2
Man1c1	P1P2	Man1c1_-_134704503.23-P1P2	GCAGCTGCGCGCTGTGGAGA	1	Man1c1_+_134704568.23-P1P2	GAACGCTGGGCAGAAACCAA	2	Man1c1_-_134704503.23-P1P2|Man1c1_+_134704568.23-P1P2
Hnrnpa0	P1P2	Hnrnpa0_+_58128711.23-P1P2	GAGGAGCCCCAGGCCCGGAC	1	Hnrnpa0_+_58128688.23-P1P2	GGTGGTGGGGAAACCGCGGA	2	Hnrnpa0_+_58128711.23-P1P2|Hnrnpa0_+_58128688.23-P1P2
1700001L19Rik	P1P2	1700001L19Rik_-_68597281.23-P1P2	GTGCTGGGAATCAGATGTAG	1	1700001L19Rik_-_68597315.23-P1P2	GCCCCCTGGCAGTTCCTACC	2	1700001L19Rik_-_68597281.23-P1P2|1700001L19Rik_-_68597315.23-P1P2
Sacs	P1P2	Sacs_-_61172948.23-P1P2	GAAGGCGTGGCTACGCGGAA	1	Sacs_+_61172848.23-P1P2	GGCTCCGCCCCTCTCGTGGA	2	Sacs_-_61172948.23-P1P2|Sacs_+_61172848.23-P1P2
Aktip	P1P2	Aktip_+_91134045.23-P1P2	GAGCGGAAGCGCCCAGTCTA	1	Aktip_+_91134073.23-P1P2	GAGAGAGAGCCATTCGGCAT	2	Aktip_+_91134045.23-P1P2|Aktip_+_91134073.23-P1P2
Pax1	P1P2	Pax1_-_147364926.23-P1P2	GGGGACGCCAGGCTCGGTGA	1	Pax1_-_147364881.23-P1P2	GGAAGCCAAGAACTAGGAGG	2	Pax1_-_147364926.23-P1P2|Pax1_-_147364881.23-P1P2
Iscu	P1	Iscu_+_113772659.23-P1	GAGAGCGGGAAGGTCCGAAG	1	Iscu_+_113772694.23-P1	GCTGACCGCGCCCTCGGAAG	2	Iscu_+_113772659.23-P1|Iscu_+_113772694.23-P1
D6Wsu163e	P1P2	D6Wsu163e_-_126939667.23-P1P2	GCGCCTGCGTGCTGAAGAGA	1	D6Wsu163e_+_126939439.23-P1P2	GAGGAAGGACGGGGACGATG	2	D6Wsu163e_-_126939667.23-P1P2|D6Wsu163e_+_126939439.23-P1P2
Por	P2	Por_-_135669876.23-P2	GAGGGCTTCGGTCATTTCAG	1	Por_+_135669897.23-P2	GTCTGCCTAGCATCCTGCTG	2	Por_-_135669876.23-P2|Por_+_135669897.23-P2
Ttll5	P1P2	Ttll5_+_85824823.23-P1P2	GAACCCAGGCTGTCACCAGA	1	Ttll5_+_85824705.23-P1P2	GTGAGCGGCGTAGCAGGAAG	2	Ttll5_+_85824823.23-P1P2|Ttll5_+_85824705.23-P1P2
Afap1l2	P1P2	Afap1l2_+_57008315.23-P1P2	GGGGTGGAGTCAGGATCGGA	1	Afap1l2_-_57008538.23-P1P2	GGGGAACAGCGAGCTCCCGT	2	Afap1l2_+_57008315.23-P1P2|Afap1l2_-_57008538.23-P1P2
Papd7	P1P2	Papd7_-_69534338.23-P1P2	Gggcgcgggcggcgctcggt	1	Papd7_-_69534357.23-P1P2	Gggggcgcgcggcgcagctg	2	Papd7_-_69534338.23-P1P2|Papd7_-_69534357.23-P1P2
Tmbim1	P1P2	Tmbim1_-_74304271.23-P1P2	GCGGCACCCCGAGACCTCCA	1	Tmbim1_+_74304293.23-P1P2	GCACACCTGGGTCGTGGTTG	2	Tmbim1_-_74304271.23-P1P2|Tmbim1_+_74304293.23-P1P2
Zfp954	P1P2	Zfp954_+_7121596.23-P1P2	GCAAGCAGGGCAGTTGTGTC	1	Zfp954_-_7121535.23-P1P2	GCTGAAATGCCCATTTTCAT	2	Zfp954_+_7121596.23-P1P2|Zfp954_-_7121535.23-P1P2
Wwc1	P1P2	Wwc1_+_35980652.23-P1P2	GTAGCCTCCTGGGGCAGAAC	1	Wwc1_+_35980687.23-P1P2	GGCCAAGAGCCCGGACACTC	2	Wwc1_+_35980652.23-P1P2|Wwc1_+_35980687.23-P1P2
Rarg	P2	Rarg_+_102257660.23-P2	GGCAGAGACCCAGGCGTCCT	1	Rarg_+_102257715.23-P2	GCAGCTCTGCCCGGCCTCCC	2	Rarg_+_102257660.23-P2|Rarg_+_102257715.23-P2
Zbtb42	P1P2	Zbtb42_-_112678685.23-P1P2	GCGGGTGGGGCGGACAGAGA	1	Zbtb42_+_112678623.23-P1P2	GAGCCCGCCGCACTCTGTGA	2	Zbtb42_-_112678685.23-P1P2|Zbtb42_+_112678623.23-P1P2
Fam120c	P1P2	Fam120c_+_151344090.23-P1P2	Gaggggcgagggaacgtggg	1	Fam120c_+_151344093.23-P1P2	Ggggaggggcgagggaacgt	2	Fam120c_+_151344090.23-P1P2|Fam120c_+_151344093.23-P1P2
Zdhhc9	P1P2	Zdhhc9_-_48209162.23-P1P2	GGACTCCCACGCAATCTCGA	1	Zdhhc9_-_48208936.23-P1P2	GCAAAAGCGGAGGCGTAAGG	2	Zdhhc9_-_48209162.23-P1P2|Zdhhc9_-_48208936.23-P1P2
Esr1	P1P2	Esr1_+_4710005.23-P1P2	GGAGCCTTGCTGTCTGCTGA	1	Esr1_+_4710041.23-P1P2	GCCTGCACGAGCTGGATGAA	2	Esr1_+_4710005.23-P1P2|Esr1_+_4710041.23-P1P2
Pla2g1b	P1P2	Pla2g1b_-_115466065.23-P1P2	GGGGTTAGGGGGAGTAGTAA	1	Pla2g1b_-_115466250.23-P1P2	GGGGCCCCATGTATAAAAGA	2	Pla2g1b_-_115466065.23-P1P2|Pla2g1b_-_115466250.23-P1P2
Ccl6	P1P2	Ccl6_-_83593181.23-P1P2	GCGAGGGCAAAGGTCATGGT	1	Ccl6_-_83593156.23-P1P2	GGGAGGGCCAAGAATGCAAC	2	Ccl6_-_83593181.23-P1P2|Ccl6_-_83593156.23-P1P2
Bhlhe41	P1P2	Bhlhe41_+_145865681.23-P1P2	GGCGCCTCGGGGAAGACGAA	1	Bhlhe41_+_145865694.23-P1P2	GCCCGCGCCCTGCAGCGCCT	2	Bhlhe41_+_145865681.23-P1P2|Bhlhe41_+_145865694.23-P1P2
Gga1	P1P2	Gga1_-_78877279.23-P1P2	GCGGTCCCGCGGGGTTTCTA	1	Gga1_-_78877160.23-P1P2	GTAAGCGGAAGTACCCCTGA	2	Gga1_-_78877279.23-P1P2|Gga1_-_78877160.23-P1P2
Clca4	P1P2	Clca4_+_144849481.23-P1P2	GGGTGCCTTAGAAAGAACGA	1	Clca4_+_144849526.23-P1P2	GACTTCACAAAGAATCCGAA	2	Clca4_+_144849481.23-P1P2|Clca4_+_144849526.23-P1P2
Suclg1	P1	Suclg1_-_73248421.23-P1	GCGCCGGCCGGGCCTCTCAT	1	Suclg1_+_73248615.23-P1	GGACCCCGGGACCTTGGCAT	2	Suclg1_-_73248421.23-P1|Suclg1_+_73248615.23-P1
Rps5	P1P2	Rps5_+_12922135.23-P1P2	GCGCCACGCCCGTCTTCTGG	1	Rps5_-_12922133.23-P1P2	GAGCCTAGCTAGTACTTCAG	2	Rps5_+_12922135.23-P1P2|Rps5_-_12922133.23-P1P2
Wiz	P2	Wiz_-_32389491.23-P2	GCCGCCGCGCCGCCATGATG	1	Wiz_+_32389499.23-P2	GCCCAAAGTGGCACAAGGGG	2	Wiz_-_32389491.23-P2|Wiz_+_32389499.23-P2
Gm14151	ENSMUST00000109890.1	Gm14151_-_151092860.23-ENSMUST00000109890.1	GCCAAACCTCTATGCTTTAG	1	Gm14151_-_151092873.23-ENSMUST00000109890.1	GCTTTAGTGGCTATAGACTC	2	Gm14151_-_151092860.23-ENSMUST00000109890.1|Gm14151_-_151092873.23-ENSMUST00000109890.1
Prrc1	P1P2	Prrc1_-_57354645.23-P1P2	GGGTGGGGACAGAACGACGA	1	Prrc1_-_57354672.23-P1P2	GGTGCACCCGGGCCAGTTGT	2	Prrc1_-_57354645.23-P1P2|Prrc1_-_57354672.23-P1P2
Polr2f	P1P2	Polr2f_+_79141121.23-P1P2	GTCCCCGGACCGTCACGATA	1	Polr2f_+_79141153.23-P1P2	GACGCCCAGGTCATCGCCTA	2	Polr2f_+_79141121.23-P1P2|Polr2f_+_79141153.23-P1P2
Nop10	P1P2	Nop10_+_112261856.23-P1P2	GCATATCCATGTGACCAGAA	1	Nop10_+_112261748.23-P1P2	GGTGTGCCAGCCACTTGCCA	2	Nop10_+_112261856.23-P1P2|Nop10_+_112261748.23-P1P2
Cers3	P1P2	Cers3_-_66743394.23-P1P2	GGCGAAGCCAGGTCAGTCTG	1	Cers3_+_66743413.23-P1P2	GGCCTCACCAGCACCGCCTA	2	Cers3_-_66743394.23-P1P2|Cers3_+_66743413.23-P1P2
Hbs1l	P1P2	Hbs1l_+_21295813.23-P1P2	GCAACCAGAGGGTTGTTGAG	1	Hbs1l_-_21295831.23-P1P2	GATCCCGCTCAACAACCCTC	2	Hbs1l_+_21295813.23-P1P2|Hbs1l_-_21295831.23-P1P2
Ids	P1P2	Ids_+_70365113.23-P1P2	GGCTCCACCCCCGACAGGGA	1	Ids_-_70365147.23-P1P2	GGGGTGGAGCCTGATGGCGC	2	Ids_+_70365113.23-P1P2|Ids_-_70365147.23-P1P2
Hsp90ab1	P1	Hsp90ab1_-_45573456.23-P1	GGGGCCTGGTTCCTGAGTCA	1	Hsp90ab1_-_45573413.23-P1	GCATGGTAGCAGATCGTGGA	2	Hsp90ab1_-_45573456.23-P1|Hsp90ab1_-_45573413.23-P1
Lbx1	P1P2	Lbx1_+_45236238.23-P1P2	GCGGCGACCGCGTCACTCCG	1	Lbx1_-_45236188.23-P1P2	GGCACCAGCCCGGAGATCTC	2	Lbx1_+_45236238.23-P1P2|Lbx1_-_45236188.23-P1P2
Kri1	ENSMUST00000038671.3	Kri1_+_21288179.23-ENSMUST00000038671.3	GTGGGTGCCGGGAGCCGTCA	1	Kri1_+_21288250.23-ENSMUST00000038671.3	GCGGTCGGGTGCTGTCGGAA	2	Kri1_+_21288179.23-ENSMUST00000038671.3|Kri1_+_21288250.23-ENSMUST00000038671.3
Ppp2r2b	ENSMUST00000025377.7	Ppp2r2b_-_43059637.23-ENSMUST00000025377.7	GGTGCAGCCGGACACGGGAG	1	Ppp2r2b_-_43059758.23-ENSMUST00000025377.7	GCCGCAGTGCCATGGATCTC	2	Ppp2r2b_-_43059637.23-ENSMUST00000025377.7|Ppp2r2b_-_43059758.23-ENSMUST00000025377.7
4921501E09Rik	P1P2	4921501E09Rik_+_33068246.23-P1P2	GGACCCCAACTCCAGGACTG	1	4921501E09Rik_-_33068120.23-P1P2	GACAGCCTAAAGAATGAAGG	2	4921501E09Rik_+_33068246.23-P1P2|4921501E09Rik_-_33068120.23-P1P2
Aarsd1	P2	Aarsd1_-_101424739.23-P2	GGTAGGAGGAAGGGTTGCGA	1	Aarsd1_+_101424781.23-P2	GAACGCTCCCGGTGTCCTTC	2	Aarsd1_-_101424739.23-P2|Aarsd1_+_101424781.23-P2
Itsn1	P1P2	Itsn1_+_91729246.23-P1P2	GTAACCGCCTGCCAATCGGA	1	Itsn1_-_91729297.23-P1P2	GCATCTATgggtggggcgga	2	Itsn1_+_91729246.23-P1P2|Itsn1_-_91729297.23-P1P2
Cdk2	P1P2	Cdk2_+_128705187.23-P1P2	GGAGCCTAAACCAGGAACTG	1	Cdk2_+_128705057.23-P1P2	GGGGCGGGGCCAGGGAAACG	2	Cdk2_+_128705187.23-P1P2|Cdk2_+_128705057.23-P1P2
Tspan33	P1P2	Tspan33_-_29693932.23-P1P2	GGCAACTGGGCAGAGGACGT	1	Tspan33_-_29694089.23-P1P2	GCCCCCGCCTCTCGGAGGAG	2	Tspan33_-_29693932.23-P1P2|Tspan33_-_29694089.23-P1P2
Lax1	P1P2	Lax1_+_133690187.23-P1P2	GTGGGGAACAGGAGGGCTGA	1	Lax1_-_133690126.23-P1P2	GGACAGGAAGCACCCTCCAC	2	Lax1_+_133690187.23-P1P2|Lax1_-_133690126.23-P1P2
Cyp3a57	P1P2	Cyp3a57_-_145345107.23-P1P2	GAAGCTCAAAGGTCAGAGTA	1	Cyp3a57_-_145345126.23-P1P2	GGGGAAATGCATGACCTTTT	2	Cyp3a57_-_145345107.23-P1P2|Cyp3a57_-_145345126.23-P1P2
Ceacam11	P1P2	Ceacam11_-_17972056.23-P1P2	GGGACAGGAGACAGACGAAA	1	Ceacam11_-_17972004.23-P1P2	GTGTGCAGTCTGGTGGACTG	2	Ceacam11_-_17972056.23-P1P2|Ceacam11_-_17972004.23-P1P2
Sdhb	P1P2	Sdhb_+_140961223.23-P1P2	GTGTGCAGCAGCGGCCCGTA	1	Sdhb_-_140961216.23-P1P2	GGGAACATAGGAAGCCCAGT	2	Sdhb_+_140961223.23-P1P2|Sdhb_-_140961216.23-P1P2
Fdx1	P1P2	Fdx1_-_51963632.23-P1P2	GCTGCCACGCCTTCGCGGGG	1	Fdx1_-_51963723.23-P1P2	GCTGGAGCAATTACTCATCA	2	Fdx1_-_51963632.23-P1P2|Fdx1_-_51963723.23-P1P2
Zmym5	P1P2	Zmym5_-_56812080.23-P1P2	GGGGCGGGCGATATTCGTCG	1	Zmym5_+_56811929.23-P1P2	GagggagggCCGGCCCAGCC	2	Zmym5_-_56812080.23-P1P2|Zmym5_+_56811929.23-P1P2
Zfp667	P1P2	Zfp667_-_6286424.23-P1P2	GTGGCCTCGCGCTGTCTCCG	1	Zfp667_-_6286259.23-P1P2	GTGGAAGCCCAGTGAGTCCG	2	Zfp667_-_6286424.23-P1P2|Zfp667_-_6286259.23-P1P2
Hoxd10	P1P2	Hoxd10_+_74691692.23-P1P2	GCCGGCCAGCCTGTCTCCCG	1	Hoxd10_+_74691729.23-P1P2	GAGTGCGCGTTGGAGACAAC	2	Hoxd10_+_74691692.23-P1P2|Hoxd10_+_74691729.23-P1P2
Olfr691	ENSMUST00000057528.1	Olfr691_+_105337928.23-ENSMUST00000057528.1	GCTGGGGACAGGATAAACAG	1	Olfr691_+_105337806.23-ENSMUST00000057528.1	GTCTAGGTGAACTTTCTCTT	2	Olfr691_+_105337928.23-ENSMUST00000057528.1|Olfr691_+_105337806.23-ENSMUST00000057528.1
Vasp	P1P2	Vasp_+_19271859.23-P1P2	GTTAAGGCGCAGGGAATTGT	1	Vasp_-_19271782.23-P1P2	GCCTCGCCGGCGCACCCCCT	2	Vasp_+_19271859.23-P1P2|Vasp_-_19271782.23-P1P2
Gm711	P1P2	Gm711_+_26933754.23-P1P2	GGGGCCGCAAGTACTACGGG	1	Gm711_+_26933758.23-P1P2	GGGCGGGGCCGCAAGTACTA	2	Gm711_+_26933754.23-P1P2|Gm711_+_26933758.23-P1P2
Tekt5	P1P2	Tekt5_+_10395470.23-P1P2	GCCCGCGGCTCCTAGCTCTT	1	Tekt5_+_10395660.23-P1P2	Ggaacttagctccttcggtt	2	Tekt5_+_10395470.23-P1P2|Tekt5_+_10395660.23-P1P2
Olfr273	ENSMUST00000051520.2	Olfr273_+_52856711.23-ENSMUST00000051520.2	GTGGATAGATAGTCACATGG	1	Olfr273_+_52856827.23-ENSMUST00000051520.2	GAAGAAGTCAGGTGTATAAT	2	Olfr273_+_52856711.23-ENSMUST00000051520.2|Olfr273_+_52856827.23-ENSMUST00000051520.2
Kansl1	P1P2	Kansl1_-_104442428.23-P1P2	Gccgccccggcgcgccgcca	1	Kansl1_-_104442359.23-P1P2	GGGCGAGTGCCGGGGACACG	2	Kansl1_-_104442428.23-P1P2|Kansl1_-_104442359.23-P1P2
Fam3b	P1P2	Fam3b_-_97505051.23-P1P2	GCAGGCTAACAGGTATGGGT	1	Fam3b_+_97505089.23-P1P2	GAAAGTGCCTCCTGCTTCTT	2	Fam3b_-_97505051.23-P1P2|Fam3b_+_97505089.23-P1P2
Klrc2	ENSMUST00000071920.4,ENSMUST00000118401.1,ENSMUST00000119533.1	Klrc2_+_129660656.23-ENSMUST00000071920.4,ENSMUST00000118401.1,ENSMUST00000119533.1	GCCTCCCTTTTTATTGCGTC	1	Klrc2_-_129660798.23-ENSMUST00000071920.4,ENSMUST00000118401.1,ENSMUST00000119533.1	GGGAAAAATGAAAAAAAATT	2	Klrc2_+_129660656.23-ENSMUST00000071920.4,ENSMUST00000118401.1,ENSMUST00000119533.1|Klrc2_-_129660798.23-ENSMUST00000071920.4,ENSMUST00000118401.1,ENSMUST00000119533.1
Olfr1138	ENSMUST00000099848.1	Olfr1138_-_87738515.23-ENSMUST00000099848.1	GCAGTACAGTGAAGTTATAA	1	Olfr1138_-_87738520.23-ENSMUST00000099848.1	GCAGTGAAGTTATAAAGGCA	2	Olfr1138_-_87738515.23-ENSMUST00000099848.1|Olfr1138_-_87738520.23-ENSMUST00000099848.1
Olfr937	ENSMUST00000055567.2	Olfr937_-_39061006.23-ENSMUST00000055567.2	Ggatctacaacaattgagtg	1	Olfr937_-_39060944.23-ENSMUST00000055567.2	Ggtgatatggaatctatcaa	2	Olfr937_-_39061006.23-ENSMUST00000055567.2|Olfr937_-_39060944.23-ENSMUST00000055567.2
Tas2r135	ENSMUST00000070178.4	Tas2r135_-_42405276.23-ENSMUST00000070178.4	GTAAGAGACACCATATGCAA	1	Tas2r135_-_42405322.23-ENSMUST00000070178.4	GTTGACAATGGGTAGGGGAT	2	Tas2r135_-_42405276.23-ENSMUST00000070178.4|Tas2r135_-_42405322.23-ENSMUST00000070178.4
Cyp2a5	P1P2	Cyp2a5_-_26835087.23-P1P2	GTCTAGTATCCATGTTATGA	1	Cyp2a5_-_26834838.23-P1P2	GGGgtcgggtgtggtagtat	2	Cyp2a5_-_26835087.23-P1P2|Cyp2a5_-_26834838.23-P1P2
Olfr589	ENSMUST00000061055.1	Olfr589_-_103155925.23-ENSMUST00000061055.1	GCCACAAGGAAAAATCTTGG	1	Olfr589_-_103155878.23-ENSMUST00000061055.1	GTAGCCTACACATGTTCTTC	2	Olfr589_-_103155925.23-ENSMUST00000061055.1|Olfr589_-_103155878.23-ENSMUST00000061055.1
Ppp1r42	P1P2	Ppp1r42_-_10009213.23-P1P2	GGACGTCAGGGAAGCCCGCA	1	Ppp1r42_-_10009275.23-P1P2	GAGTTGGTGTTGTGCACTGG	2	Ppp1r42_-_10009213.23-P1P2|Ppp1r42_-_10009275.23-P1P2
Tnfaip3	P1P2	Tnfaip3_-_19015515.23-P1P2	GCCCGCCCGGAGAAACTCCT	1	Tnfaip3_-_19015526.23-P1P2	GAAACTCCTAGGTCCCGCCC	2	Tnfaip3_-_19015515.23-P1P2|Tnfaip3_-_19015526.23-P1P2
Spin2c	P1P2	Spin2c_-_153832171.23-P1P2	GTAGAACCACGGTGTGGAGT	1	Spin2c_-_153832071.23-P1P2	GCGCAAGAAGGGTTGTGTGG	2	Spin2c_-_153832171.23-P1P2|Spin2c_-_153832071.23-P1P2
Abhd6	P1P2	Abhd6_-_8002703.23-P1P2	GCGGAGAGGCGCTCCGGGGA	1	Abhd6_+_8002879.23-P1P2	GCACTCTCGCTCTCGGCAGT	2	Abhd6_-_8002703.23-P1P2|Abhd6_+_8002879.23-P1P2
Hepacam	P1P2	Hepacam_-_37367476.23-P1P2	GGTCCAAACTAAGGGGCGAA	1	Hepacam_-_37367422.23-P1P2	GCCACCTGAGCCCCATAGGA	2	Hepacam_-_37367476.23-P1P2|Hepacam_-_37367422.23-P1P2
Sdc1	P1P2	Sdc1_-_8771317.23-P1P2	GGGGCCCGAGGGGTGGAGAT	1	Sdc1_-_8771292.23-P1P2	GAAGGGGCGGGGCAACCCAG	2	Sdc1_-_8771317.23-P1P2|Sdc1_-_8771292.23-P1P2
Olfr958	ENSMUST00000062545.2	Olfr958_+_39551042.23-ENSMUST00000062545.2	GCGTGGACAAAACATTCAGT	1	Olfr958_+_39551036.23-ENSMUST00000062545.2	GCAAAACATTCAGTTGGCTA	2	Olfr958_+_39551042.23-ENSMUST00000062545.2|Olfr958_+_39551036.23-ENSMUST00000062545.2
Icmt	P1P2	Icmt_+_152297196.23-P1P2	GAGACTGCCGCGGCGGTTGA	1	Icmt_+_152297112.23-P1P2	GGGACAGCGTGACGTCGCAA	2	Icmt_+_152297196.23-P1P2|Icmt_+_152297112.23-P1P2
St14	P1P2	St14_-_31131891.23-P1P2	GGGCGCCCGCACACCTGTTG	1	St14_+_31132034.23-P1P2	GGAGAGATGGCCAGTATCAA	2	St14_-_31131891.23-P1P2|St14_+_31132034.23-P1P2
Cd209g	ENSMUST00000130372.1	Cd209g_+_4134521.23-ENSMUST00000130372.1	GAGAGCAGAGACAGGAGCTA	1	Cd209g_-_4134489.23-ENSMUST00000130372.1	Gcctgcacatgtactgtaac	2	Cd209g_+_4134521.23-ENSMUST00000130372.1|Cd209g_-_4134489.23-ENSMUST00000130372.1
Olfr286	ENSMUST00000073612.3	Olfr286_-_98227921.23-ENSMUST00000073612.3	Gtgggccgccctgtatcaat	1	Olfr286_-_98227790.23-ENSMUST00000073612.3	Gtaggcagggatttaaggca	2	Olfr286_-_98227921.23-ENSMUST00000073612.3|Olfr286_-_98227790.23-ENSMUST00000073612.3
Pdcd1lg2	P1P2	Pdcd1lg2_-_29410761.23-P1P2	GAGGGTGCCTGGCAGGTAAG	1	Pdcd1lg2_-_29410743.23-P1P2	GGACAAGAACAATGGCTCTA	2	Pdcd1lg2_-_29410761.23-P1P2|Pdcd1lg2_-_29410743.23-P1P2
Olfr76	ENSMUST00000087822.2	Olfr76_-_12120788.23-ENSMUST00000087822.2	GAACAGCTGCACATCACAGA	1	Olfr76_+_12120926.23-ENSMUST00000087822.2	Gtctgagataggtcaactaa	2	Olfr76_-_12120788.23-ENSMUST00000087822.2|Olfr76_+_12120926.23-ENSMUST00000087822.2
Vmn1r214	ENSMUST00000074252.2	Vmn1r214_-_23034056.23-ENSMUST00000074252.2	GGAGGTAATCAGTTCAATTG	1	Vmn1r214_+_23033855.23-ENSMUST00000074252.2	GAAGAGACAGCATCTGTCCT	2	Vmn1r214_-_23034056.23-ENSMUST00000074252.2|Vmn1r214_+_23033855.23-ENSMUST00000074252.2
Clec2j	ENSMUST00000032517.6	Clec2j_-_128657177.23-ENSMUST00000032517.6	GAGAAGGCCCTGGTCTACAA	1	Clec2j_+_128657326.23-ENSMUST00000032517.6	GGAGTCTGTACATCTACAGA	2	Clec2j_-_128657177.23-ENSMUST00000032517.6|Clec2j_+_128657326.23-ENSMUST00000032517.6
Hr	P1P2	Hr_-_70552053.23-P1P2	GCAAGCATGGCCACAGGGGT	1	Hr_+_70551999.23-P1P2	GCATGGGGAAGGGGGATACA	2	Hr_-_70552053.23-P1P2|Hr_+_70551999.23-P1P2
Samd9l	P1P2	Samd9l_+_3399601.23-P1P2	GAACCAGCAGGTGGCATAGT	1	Samd9l_-_3399908.23-P1P2	Gcacaggcagaaaagattaa	2	Samd9l_+_3399601.23-P1P2|Samd9l_-_3399908.23-P1P2
Spint2	P1P2	Spint2_+_29282098.23-P1P2	GCTCCCGCAAGGTCCGGCTG	1	Spint2_-_29282126.23-P1P2	GCGGACCTTGCGGGAGGCGT	2	Spint2_+_29282098.23-P1P2|Spint2_-_29282126.23-P1P2
Icosl	P1P2	Icosl_+_78069083.23-P1P2	GGGCACTGAGGCTTAGGGTG	1	Icosl_+_78069193.23-P1P2	GTGAGCAGGGTCGGAGACTT	2	Icosl_+_78069083.23-P1P2|Icosl_+_78069193.23-P1P2
Avl9	P1P2	Avl9_+_56714768.23-P1P2	GAGGGGAGGGGCTGTATAAC	1	Avl9_+_56714695.23-P1P2	GAAGGCGCGGCCTACACGAC	2	Avl9_+_56714768.23-P1P2|Avl9_+_56714695.23-P1P2
Renbp	P1P2	Renbp_-_73930951.23-P1P2	GGATCCCCCTGGTGGGAACT	1	Renbp_+_73930884.23-P1P2	GCCTAGAAGAGCAGAAGGCG	2	Renbp_-_73930951.23-P1P2|Renbp_+_73930884.23-P1P2
Ppp1r27	P1P2	Ppp1r27_-_120551264.23-P1P2	GAGCACAGGATCATGTTTAG	1	Ppp1r27_+_120551330.23-P1P2	GCTAGGTCCAGCTGCGGAGA	2	Ppp1r27_-_120551264.23-P1P2|Ppp1r27_+_120551330.23-P1P2
Zfhx4	P1P2	Zfhx4_+_5218469.23-P1P2	GgggagagGTGTAATTAGTG	1	Zfhx4_+_5218345.23-P1P2	GGACGAGGCGACTAAGGAGA	2	Zfhx4_+_5218469.23-P1P2|Zfhx4_+_5218345.23-P1P2
Gbp5	P1P2	Gbp5_+_142496789.23-P1P2	GAGAACAGGAATCTGCAAAA	1	Gbp5_-_142496846.23-P1P2	GAAGTTCTCTCCCAGCTCTC	2	Gbp5_+_142496789.23-P1P2|Gbp5_-_142496846.23-P1P2
Ripk2	P1P2	Ripk2_+_16163714.23-P1P2	Gagagggaggagaccgcgga	1	Ripk2_+_16163586.23-P1P2	GgtaggagCCCGCCCAGGGA	2	Ripk2_+_16163714.23-P1P2|Ripk2_+_16163586.23-P1P2
Mff	P1P2	Mff_+_82724860.23-P1P2	GTGGTCATGTGACGAGAGAA	1	Mff_+_82724805.23-P1P2	GGCGGAGCCATTTTTGTCGT	2	Mff_+_82724860.23-P1P2|Mff_+_82724805.23-P1P2
Rfwd2	P1P2	Rfwd2_+_159232207.23-P1P2	GACTGCCGAGGAGGCCGCCG	1	Rfwd2_+_159232158.23-P1P2	GCGGGCTTGCGCATGAGCGG	2	Rfwd2_+_159232207.23-P1P2|Rfwd2_+_159232158.23-P1P2
Rpl10l	P1P2	Rpl10l_-_66284584.23-P1P2	GCACCACTGCCCACCGAATT	1	Rpl10l_-_66284611.23-P1P2	GTGACCTTAAGCTTTGTAGT	2	Rpl10l_-_66284584.23-P1P2|Rpl10l_-_66284611.23-P1P2
Olfr684	ENSMUST00000060893.4	Olfr684_+_105157785.23-ENSMUST00000060893.4	GTCACTGGGACAGGTTCAAG	1	Olfr684_+_105157780.23-ENSMUST00000060893.4	GGGGACAGGTTCAAGCGGGA	2	Olfr684_+_105157785.23-ENSMUST00000060893.4|Olfr684_+_105157780.23-ENSMUST00000060893.4
Cfdp1	P1P2	Cfdp1_-_111854457.23-P1P2	GTCAGAAGCGATGCATGCTG	1	Cfdp1_+_111854408.23-P1P2	GGGGGTCCGGAATCCCACAA	2	Cfdp1_-_111854457.23-P1P2|Cfdp1_+_111854408.23-P1P2
Zfp768	P1P2	Zfp768_+_127345552.23-P1P2	GGCTAGGGGCCGAGACTAGA	1	Zfp768_+_127345526.23-P1P2	GGGGCTGGGAGTTGTGGCTG	2	Zfp768_+_127345552.23-P1P2|Zfp768_+_127345526.23-P1P2
Olfr1412	ENSMUST00000062964.2	Olfr1412_+_92588153.23-ENSMUST00000062964.2	GAAAGAGGGTATCTCCTCTG	1	Olfr1412_-_92588017.23-ENSMUST00000062964.2	GTCACTCAGGATATCCCTGG	2	Olfr1412_+_92588153.23-ENSMUST00000062964.2|Olfr1412_-_92588017.23-ENSMUST00000062964.2
Clrn2	P1P2	Clrn2_+_45453559.23-P1P2	GCAGACTAGGGTTTCAGCAG	1	Clrn2_+_45453271.23-P1P2	GGAGCTGTTACTAATACCGT	2	Clrn2_+_45453559.23-P1P2|Clrn2_+_45453271.23-P1P2
Fam24a	P1P2	Fam24a_-_131334516.23-P1P2	GCTGTGGGTTGATGTCACAC	1	Fam24a_-_131334313.23-P1P2	GAAACACTGCCAATCACGAA	2	Fam24a_-_131334516.23-P1P2|Fam24a_-_131334313.23-P1P2
Erf	P1P2	Erf_-_25250992.23-P1P2	GGGGTCACGACCCTTCTTGG	1	Erf_-_25250884.23-P1P2	GTGCCGGCGCGCAGCCACTG	2	Erf_-_25250992.23-P1P2|Erf_-_25250884.23-P1P2
Palm2	P1	Palm2_+_57567946.23-P1	GCCGCCGTCGCTCGCGAGTG	1	Palm2_+_57567937.23-P1	GCTCGCGAGTGGGGCACCTG	2	Palm2_+_57567946.23-P1|Palm2_+_57567937.23-P1
Igf2	P1	Igf2_+_142657633.23-P1	GTGGTCCAAGGCTAGCTCTT	1	Igf2_+_142657603.23-P1	GAGAAAAGGGACTGGCTgga	2	Igf2_+_142657633.23-P1|Igf2_+_142657603.23-P1
Prss50	P1P2	Prss50_-_110857783.23-P1P2	GGCTGCTGGTGGAGAAAGCA	1	Prss50_-_110857738.23-P1P2	GTAGGGGTATCGACACGTCG	2	Prss50_-_110857783.23-P1P2|Prss50_-_110857738.23-P1P2
Mogat2	P1P2	Mogat2_+_99238706.23-P1P2	GGTACGGGGAAAAAAGGATG	1	Mogat2_+_99238687.23-P1P2	GTGGCGTGGGCGGAGCAGGA	2	Mogat2_+_99238706.23-P1P2|Mogat2_+_99238687.23-P1P2
Olfr1183	ENSMUST00000102618.1	Olfr1183_-_88461213.23-ENSMUST00000102618.1	GGCTTCTTCATGACTATGGA	1	Olfr1183_-_88460904.23-ENSMUST00000102618.1	GACAGGGAAAGAGTGAACAA	2	Olfr1183_-_88461213.23-ENSMUST00000102618.1|Olfr1183_-_88460904.23-ENSMUST00000102618.1
Lyar	P1P2	Lyar_+_38220351.23-P1P2	GGCGACGAGAAAGGGTGTCA	1	Lyar_-_38220296.23-P1P2	GCCTACCCGCGCCAACCCAC	2	Lyar_+_38220351.23-P1P2|Lyar_-_38220296.23-P1P2
Col28a1	P1P2	Col28a1_-_8192936.23-P1P2	GAAGAACGAGGGGTTCTTTG	1	Col28a1_-_8192925.23-P1P2	GAACTCTATAGAAAGAACGA	2	Col28a1_-_8192936.23-P1P2|Col28a1_-_8192925.23-P1P2
Synb	ENSMUST00000059362.2	Synb_-_69294838.23-ENSMUST00000059362.2	GGAAAAGTGACTGGCGGAGG	1	Synb_-_69294832.23-ENSMUST00000059362.2	GAACTTTGAAAAGTGACTGG	2	Synb_-_69294838.23-ENSMUST00000059362.2|Synb_-_69294832.23-ENSMUST00000059362.2
Gpr126	P1P2	Gpr126_+_14545565.23-P1P2	GCGGCCCGCGGGTGACCTCG	1	Gpr126_-_14545524.23-P1P2	GggcggcggggTTGGAAGAC	2	Gpr126_+_14545565.23-P1P2|Gpr126_-_14545524.23-P1P2
Sdhaf2	P1P2	Sdhaf2_+_10525289.23-P1P2	GGCCGCGGAGAGTCCCGACT	1	Sdhaf2_+_10525323.23-P1P2	GgccgcgcgcccCCGTTACC	2	Sdhaf2_+_10525289.23-P1P2|Sdhaf2_+_10525323.23-P1P2
Gab3	P1P2	Gab3_-_75085032.23-P1P2	GCACCCCCAGGACTTGAGGA	1	Gab3_-_75085310.23-P1P2	GAAAACACTAGGTGACCTAA	2	Gab3_-_75085032.23-P1P2|Gab3_-_75085310.23-P1P2
6030458C11Rik	P1P2	6030458C11Rik_-_12824633.23-P1P2	GCGCCCCCAAGGCACGATCG	1	6030458C11Rik_+_12824798.23-P1P2	GAGAAATCCGGACCTGGGGA	2	6030458C11Rik_-_12824633.23-P1P2|6030458C11Rik_+_12824798.23-P1P2
Ubc	P1P2	Ubc_-_125389986.23-P1P2	GAGGGCAGGGCTGTGACCTC	1	Ubc_-_125390111.23-P1P2	GCGGCCTGGCGCCCCTAGTC	2	Ubc_-_125389986.23-P1P2|Ubc_-_125390111.23-P1P2
Nexn	P1	Nexn_-_152248445.23-P1	GGGTACTTCACCTCCATAAG	1	Nexn_+_152248587.23-P1	GTCCTTGAAACTGCCATCAG	2	Nexn_-_152248445.23-P1|Nexn_+_152248587.23-P1
Huwe1	P2	Huwe1_-_151800760.23-P2	GGAGCAGGAGCGCCCTCTCA	1	Huwe1_-_151800792.23-P2	GGGGCTAATCGCGTGGTAGG	2	Huwe1_-_151800760.23-P2|Huwe1_-_151800792.23-P2
Bbs9	P1P2	Bbs9_+_22475590.23-P1P2	GGAGTAGAGTGGCTACGGGG	1	Bbs9_+_22475529.23-P1P2	GTCCCTCAGGGTATCGGCGG	2	Bbs9_+_22475590.23-P1P2|Bbs9_+_22475529.23-P1P2
Setd5	P1P2	Setd5_-_113077278.23-P1P2	GGCACCGGCCAATAAGTGTG	1	Setd5_-_113077285.23-P1P2	GCCAATAAGTGTGGGGCGGT	2	Setd5_-_113077278.23-P1P2|Setd5_-_113077285.23-P1P2
H60b	P2	H60b_-_22273360.23-P2	GGGCACCGGAACCTCCTCCA	1	H60b_+_22273343.23-P2	GGAAGCCATGGAGGAGGTTC	2	H60b_-_22273360.23-P2|H60b_+_22273343.23-P2
Hras	P1P2	Hras_-_141194132.23-P1P2	GCAGAAGCCGAAGCTGGGCG	1	Hras_+_141194066.23-P1P2	GACAACAGGTCGCGGTGCGG	2	Hras_-_141194132.23-P1P2|Hras_+_141194066.23-P1P2
Abhd13	P1P2	Abhd13_-_9977748.23-P1P2	GCATGCGCATAGGGGTGCAC	1	Abhd13_-_9977710.23-P1P2	GGGCTACCGTAGCATGAAGG	2	Abhd13_-_9977748.23-P1P2|Abhd13_-_9977710.23-P1P2
Zfp688	P1P2	Zfp688_-_127422133.23-P1P2	GAACGCGTGCGGAACGAACG	1	Zfp688_-_127422154.23-P1P2	GGCAGCCTTACTGGCCGCAA	2	Zfp688_-_127422133.23-P1P2|Zfp688_-_127422154.23-P1P2
Mamdc2	P1P2	Mamdc2_-_23448460.23-P1P2	GCTGCCCCGCCCATCCACGG	1	Mamdc2_-_23448480.23-P1P2	GGGGAAACAGCTTATTTCAG	2	Mamdc2_-_23448460.23-P1P2|Mamdc2_-_23448480.23-P1P2
Dynll2	P1P2	Dynll2_-_87987681.23-P1P2	GAATGCCTCggggcggagga	1	Dynll2_+_87987602.23-P1P2	GGGGAGAAGCCCGCAGTGCG	2	Dynll2_-_87987681.23-P1P2|Dynll2_+_87987602.23-P1P2
Sox17	P1	Sox17_-_4493831.23-P1	GACCTCTTGGGGAAATAGGA	1	Sox17_-_4493819.23-P1	GGCTGGCGCCAAGACCTCTT	2	Sox17_-_4493831.23-P1|Sox17_-_4493819.23-P1
Lce3f	P1P2	Lce3f_-_92991826.23-P1P2	GTAAAGGGCTGAGTGATCAG	1	Lce3f_-_92992121.23-P1P2	GGGAAGATGCTGGGAGCATT	2	Lce3f_-_92991826.23-P1P2|Lce3f_-_92992121.23-P1P2
Kif27	ENSMUST00000043605.5	Kif27_+_58355026.23-ENSMUST00000043605.5	GGTAAAGAATCTGTTCAAAA	1	Kif27_+_58355204.23-ENSMUST00000043605.5	GACACTCTGGACATAAACAG	2	Kif27_+_58355026.23-ENSMUST00000043605.5|Kif27_+_58355204.23-ENSMUST00000043605.5
Pde6g	P1P2	Pde6g_-_120453619.23-P1P2	GGAAGGGGTCATACAGTTAA	1	Pde6g_-_120453645.23-P1P2	GAAGGCCACCCAAGTCCAGT	2	Pde6g_-_120453619.23-P1P2|Pde6g_-_120453645.23-P1P2
Sp2	P2	Sp2_+_96968810.23-P2	GTCAGAAGAGCCCTAAGCAA	1	Sp2_+_96968806.23-P2	GAAGAGCCCTAAGCAAGGGA	2	Sp2_+_96968810.23-P2|Sp2_+_96968806.23-P2
Mak16	P1P2	Mak16_-_31168861.23-P1P2	GCCAGCGCACGCTTGGATCC	1	Mak16_+_31168989.23-P1P2	GCGTGCACAAGTGACTCGGA	2	Mak16_-_31168861.23-P1P2|Mak16_+_31168989.23-P1P2
Frs2	P1P2	Frs2_+_117148673.23-P1P2	GGGGGCCCGCGGGACCACAG	1	Frs2_-_117148690.23-P1P2	GCTAACCCCTGTGGTCCCGC	2	Frs2_+_117148673.23-P1P2|Frs2_-_117148690.23-P1P2
Lnx2	P1P2	Lnx2_-_147076641.23-P1P2	GCAAAGGCGGGACTAAGAGC	1	Lnx2_+_147076801.23-P1P2	GGCCCGGCGCGGCGCTCCAG	2	Lnx2_-_147076641.23-P1P2|Lnx2_+_147076801.23-P1P2
Wnt9b	P1P2	Wnt9b_-_103750030.23-P1P2	GCCCACTCCAGCAAAGAAGG	1	Wnt9b_-_103750027.23-P1P2	GGCGCCCACTCCAGCAAAGA	2	Wnt9b_-_103750030.23-P1P2|Wnt9b_-_103750027.23-P1P2
Ranbp6	P1P2	Ranbp6_+_29813150.23-P1P2	GTCTACAGGAGCACATCGGT	1	Ranbp6_+_29813142.23-P1P2	GAGCACATCGGTCGGAGAAC	2	Ranbp6_+_29813150.23-P1P2|Ranbp6_+_29813142.23-P1P2
Svs3a	P1P2	Svs3a_+_164288728.23-P1P2	GTCTGTGTGAGACTCCCCCA	1	Svs3a_-_164288736.23-P1P2	GTAGTGACAGGAAACCCTGG	2	Svs3a_+_164288728.23-P1P2|Svs3a_-_164288736.23-P1P2
Zfp296	P1P2	Zfp296_-_19577166.23-P1P2	GGTGAAATCAAGGCCTGTGG	1	Zfp296_-_19577163.23-P1P2	GCGGGTGAAATCAAGGCCTG	2	Zfp296_-_19577166.23-P1P2|Zfp296_-_19577163.23-P1P2
Vmn2r74	ENSMUST00000166355.1	Vmn2r74_+_85961592.23-ENSMUST00000166355.1	GGCACTTCTCCTTTAGTAGG	1	Vmn2r74_+_85961742.23-ENSMUST00000166355.1	GATGCATGAAAAAGATAATC	2	Vmn2r74_+_85961592.23-ENSMUST00000166355.1|Vmn2r74_+_85961742.23-ENSMUST00000166355.1
Slc25a10	P1P2	Slc25a10_-_120491518.23-P1P2	GCCCCCCTACATCTGGGCGG	1	Slc25a10_-_120491623.23-P1P2	GAGGGCATAAGTTCAGACTA	2	Slc25a10_-_120491518.23-P1P2|Slc25a10_-_120491623.23-P1P2
Ube2u	P1P2	Ube2u_-_100478679.23-P1P2	GTGGTGTCCGGGTGCACTGA	1	Ube2u_+_100478647.23-P1P2	GCCCGGACACCAGTGGGGTA	2	Ube2u_-_100478679.23-P1P2|Ube2u_+_100478647.23-P1P2
Rec8	P1P2	Rec8_+_55618106.23-P1P2	GATCAGGTGCACACTCTCCA	1	Rec8_-_55618025.23-P1P2	GTCTCCAAGAGCCTATGGCC	2	Rec8_+_55618106.23-P1P2|Rec8_-_55618025.23-P1P2
Olfr394	ENSMUST00000071478.1	Olfr394_+_73888689.23-ENSMUST00000071478.1	GGAAGCATCTTGGAAATGAT	1	Olfr394_+_73888756.23-ENSMUST00000071478.1	GCCCAGGGTGAGCAGGAAAT	2	Olfr394_+_73888689.23-ENSMUST00000071478.1|Olfr394_+_73888756.23-ENSMUST00000071478.1
Olfr344	ENSMUST00000075474.1	Olfr344_+_36568425.23-ENSMUST00000075474.1	GGTAATGAGCTACTAATATT	1	Olfr344_-_36568338.23-ENSMUST00000075474.1	GGGCACCTTGATATGGAAAT	2	Olfr344_+_36568425.23-ENSMUST00000075474.1|Olfr344_-_36568338.23-ENSMUST00000075474.1
Olfr1308	ENSMUST00000099605.1	Olfr1308_-_111961164.23-ENSMUST00000099605.1	GGGAGAATCTTCAAGTTGTG	1	Olfr1308_+_111961391.23-ENSMUST00000099605.1	GGCTGCCAAGAACAAAACTA	2	Olfr1308_-_111961164.23-ENSMUST00000099605.1|Olfr1308_+_111961391.23-ENSMUST00000099605.1
Cpb1	P1	Cpb1_-_20275880.23-P1	GAACCTAGAATCATTAGTGT	1	Cpb1_+_20275851.23-P1	GAATGATTCTAGGTTAAATG	2	Cpb1_-_20275880.23-P1|Cpb1_+_20275851.23-P1
Ell2	P1P2	Ell2_+_75707367.23-P1P2	GGGGCGGGGCCCAAAGTCGC	1	Ell2_+_75707328.23-P1P2	GGGGACGTCCGACAGAGGAG	2	Ell2_+_75707367.23-P1P2|Ell2_+_75707328.23-P1P2
Josd2	P1P2	Josd2_+_44467833.23-P1P2	GAGCTCGCACGCTGCTGCTA	1	Josd2_-_44467940.23-P1P2	GTCTAGGCAGCAGTGAGCCC	2	Josd2_+_44467833.23-P1P2|Josd2_-_44467940.23-P1P2
Nsun6	P2	Nsun6_+_15055232.23-P2	GGCCCGGGACCACCCATCGC	1	Nsun6_-_15055258.23-P2	GGATGGGTGGTCCCGGGCGT	2	Nsun6_+_15055232.23-P2|Nsun6_-_15055258.23-P2
Serpina7	P1P2	Serpina7_-_139085310.23-P1P2	GTAACCATGCCATGAACTCT	1	Serpina7_-_139085460.23-P1P2	GAGTTCTTCCTGTCAGTGTT	2	Serpina7_-_139085310.23-P1P2|Serpina7_-_139085460.23-P1P2
Prdm1	P1P2	Prdm1_-_44458866.23-P1P2	GCCGTGCAGCGTGGGGTTCA	1	Prdm1_-_44458858.23-P1P2	GCAGCCCAGCCGTGCAGCGT	2	Prdm1_-_44458866.23-P1P2|Prdm1_-_44458858.23-P1P2
Defb2	P1P2	Defb2_+_21839552.23-P1P2	GCAGAAGATAAGCTGATCCA	1	Defb2_+_21839600.23-P1P2	GACAGCCTAGAGTTCCTATG	2	Defb2_+_21839552.23-P1P2|Defb2_+_21839600.23-P1P2
Oprd1	P1P2	Oprd1_+_132144642.23-P1P2	GAGCGCGCGCGAGGCCTCTC	1	Oprd1_-_132144690.23-P1P2	GCCTGGGCTCCGCTGACTCC	2	Oprd1_+_132144642.23-P1P2|Oprd1_-_132144690.23-P1P2
Crygc	P1P2	Crygc_+_65073689.23-P1P2	GAGCTCATCTAGGACAGCGT	1	Crygc_+_65073670.23-P1P2	GTGGAACACACCAGAGAACC	2	Crygc_+_65073689.23-P1P2|Crygc_+_65073670.23-P1P2
Zfp78	P1P2	Zfp78_+_6363196.23-P1P2	GGAAGTCTGCGATGAGAAGC	1	Zfp78_+_6363060.23-P1P2	GGAAACTGGAGTAAGGGGCG	2	Zfp78_+_6363196.23-P1P2|Zfp78_+_6363060.23-P1P2
Hspb1	P1P2	Hspb1_+_135887712.23-P1P2	GGACACTGCTGGCTGAAGGG	1	Hspb1_+_135887849.23-P1P2	GCCTCCCCCTAAGCTTGCAA	2	Hspb1_+_135887712.23-P1P2|Hspb1_+_135887849.23-P1P2
Pigl	P1P2	Pigl_-_62458472.23-P1P2	GTACCCGGCATGGAATTGGT	1	Pigl_+_62458343.23-P1P2	GGTGGGTCAGAGTGCGGCGG	2	Pigl_-_62458472.23-P1P2|Pigl_+_62458343.23-P1P2
Ccl11	P1P2	Ccl11_+_82057739.23-P1P2	GGGGACTTGGCATCTGTTAA	1	Ccl11_+_82057815.23-P1P2	GAAGGAGGGGTCTTGAGCAG	2	Ccl11_+_82057739.23-P1P2|Ccl11_+_82057815.23-P1P2
Colgalt2	P1P2	Colgalt2_-_152399722.23-P1P2	GTGTGAAGAACTTCAGACTG	1	Colgalt2_+_152399681.23-P1P2	GCAGTGACGCGATGTATCCA	2	Colgalt2_-_152399722.23-P1P2|Colgalt2_+_152399681.23-P1P2
Fkbp1a	P1P2	Fkbp1a_-_151542465.23-P1P2	GCCGCCGCAGCTGCATCCGG	1	Fkbp1a_+_151542490.23-P1P2	GAAGCGGGGCAGCTAGGCGG	2	Fkbp1a_-_151542465.23-P1P2|Fkbp1a_+_151542490.23-P1P2
Atp5b	P1P2	Atp5b_+_128083064.23-P1P2	GGGCCCATGGGAACGTCAGT	1	Atp5b_+_128083231.23-P1P2	GCCGCCGTAGGCACAGTAAT	2	Atp5b_+_128083064.23-P1P2|Atp5b_+_128083231.23-P1P2
B2m	P1P2	B2m_-_122147443.23-P1P2	GAATAAATGAAGGCGGTCCC	1	B2m_+_122147614.23-P1P2	GAATCCGGACTCAGATCCGG	2	B2m_-_122147443.23-P1P2|B2m_+_122147614.23-P1P2
Olfr808	ENSMUST00000060636.1	Olfr808_-_129767088.23-ENSMUST00000060636.1	GAAGAGTTGTTAGGAGTATG	1	Olfr808_+_129767105.23-ENSMUST00000060636.1	GCCTCCTAACTCAGATCCAT	2	Olfr808_-_129767088.23-ENSMUST00000060636.1|Olfr808_+_129767105.23-ENSMUST00000060636.1
Cnfn	P1P2	Cnfn_-_25370034.23-P1P2	GACCCAGGGCAGGGGAGATA	1	Cnfn_+_25369835.23-P1P2	GAGGGAGGATGGAAAATCCA	2	Cnfn_-_25370034.23-P1P2|Cnfn_+_25369835.23-P1P2
Arhgap30	P1P2	Arhgap30_+_171388794.23-P1P2	GTGCCTGGGGTGTGAGCAGG	1	Arhgap30_-_171389010.23-P1P2	GGAGCTGCACAGGACGAGAA	2	Arhgap30_+_171388794.23-P1P2|Arhgap30_-_171389010.23-P1P2
Tmbim4	P1P2	Tmbim4_+_120208671.23-P1P2	GGAAAAGTCTCCACTAGGAG	1	Tmbim4_+_120208619.23-P1P2	GCTCTCCCACGTCATCGCAA	2	Tmbim4_+_120208671.23-P1P2|Tmbim4_+_120208619.23-P1P2
Lat	P1P2	Lat_-_126369724.23-P1P2	GGCAGCCCGTCCACTAGGAA	1	Lat_-_126369784.23-P1P2	GCCCGGGTGGGAGAACTGCA	2	Lat_-_126369724.23-P1P2|Lat_-_126369784.23-P1P2
Cacng4	P1P2	Cacng4_-_107794831.23-P1P2	Ggccgcccggcgcgctctct	1	Cacng4_+_107794898.23-P1P2	GGCGCGCGTGAGCGCAGGGA	2	Cacng4_-_107794831.23-P1P2|Cacng4_+_107794898.23-P1P2
Olfr603	ENSMUST00000071844.1	Olfr603_-_103384360.23-ENSMUST00000071844.1	GTAGCTCTTTAAAAATACGT	1	Olfr603_+_103384493.23-ENSMUST00000071844.1	GTTGATGTGTTTGTTGGAAC	2	Olfr603_-_103384360.23-ENSMUST00000071844.1|Olfr603_+_103384493.23-ENSMUST00000071844.1
Spata6	P1P2	Spata6_+_111719827.23-P1P2	GGGAACAGCTAGCTGTGCTG	1	Spata6_+_111719919.23-P1P2	GGCGGGGCCCGGATTGTGGT	2	Spata6_+_111719827.23-P1P2|Spata6_+_111719919.23-P1P2
Tmed3	P1P2	Tmed3_-_89705079.23-P1P2	GAGCCGCACACCAGAGAGGT	1	Tmed3_-_89705125.23-P1P2	GCAAGCGCATCACTGAGTTT	2	Tmed3_-_89705079.23-P1P2|Tmed3_-_89705125.23-P1P2
Atcay	P1P2	Atcay_+_81230835.23-P1P2	GGATGCTAGAACTGTCTATC	1	Atcay_+_81231089.23-P1P2	GCCCTCAAAGATGGTTTCAA	2	Atcay_+_81230835.23-P1P2|Atcay_+_81231089.23-P1P2
Ndufb3	P1P2	Ndufb3_+_58586449.23-P1P2	GTGCAGCTGGAGTCTGCTTG	1	Ndufb3_+_58586200.23-P1P2	GCGGGGTGACAGGTAGGCGG	2	Ndufb3_+_58586449.23-P1P2|Ndufb3_+_58586200.23-P1P2
3110082J24Rik	ENSMUST00000127749.3	3110082J24Rik_+_30105506.23-ENSMUST00000127749.3	GCCCCCCATCAACGGGGACA	1	3110082J24Rik_-_30105421.23-ENSMUST00000127749.3	GCAGGTACCCGGTGTCTAGA	2	3110082J24Rik_+_30105506.23-ENSMUST00000127749.3|3110082J24Rik_-_30105421.23-ENSMUST00000127749.3
Mptx2	ENSMUST00000111224.3	Mptx2_-_173277861.23-ENSMUST00000111224.3	GAAGAAGACAAAGTAATAAA	1	Mptx2_-_173277818.23-ENSMUST00000111224.3	GCTCTTATATAGGACTCACT	2	Mptx2_-_173277861.23-ENSMUST00000111224.3|Mptx2_-_173277818.23-ENSMUST00000111224.3
Txlng	P1P2	Txlng_-_162829519.23-P1P2	GGTGGGGAGCGTAAAATTTT	1	Txlng_-_162829536.23-P1P2	GTTGGGCTGGGCTTCTGTTA	2	Txlng_-_162829519.23-P1P2|Txlng_-_162829536.23-P1P2
Tspan15	P1P2	Tspan15_-_62231480.23-P1P2	GTGGAGAGGCGCAGGAGTAA	1	Tspan15_+_62231406.23-P1P2	GGAGGACAGGATCTATGCAC	2	Tspan15_-_62231480.23-P1P2|Tspan15_+_62231406.23-P1P2
Stat5b	P2	Stat5b_-_100822910.23-P2	Gtgggccatggcatacgtgt	1	Stat5b_+_100822736.23-P2	GTTCAGCCGAGACCCTTCAG	2	Stat5b_-_100822910.23-P2|Stat5b_+_100822736.23-P2
Pias4	P1P2	Pias4_-_81167896.23-P1P2	GCCTACAGGAACCCCGCCCG	1	Pias4_+_81167833.23-P1P2	GTCCCGCCTCTCAGACGCGG	2	Pias4_-_81167896.23-P1P2|Pias4_+_81167833.23-P1P2
Pwp2	P1P2	Pwp2_-_78185294.23-P1P2	GCTAGCTGAGACCGCTAGGA	1	Pwp2_-_78185255.23-P1P2	GCACCACCCTGCCTCTACGC	2	Pwp2_-_78185294.23-P1P2|Pwp2_-_78185255.23-P1P2
Olfr1427	ENSMUST00000087825.2	Olfr1427_+_12099925.23-ENSMUST00000087825.2	GTAAATGTAGCCTAGAAGTT	1	Olfr1427_-_12099937.23-ENSMUST00000087825.2	GCCTTATGAGCCAAACTTCT	2	Olfr1427_+_12099925.23-ENSMUST00000087825.2|Olfr1427_-_12099937.23-ENSMUST00000087825.2
Arhgef39	P1P2	Arhgef39_+_43499768.23-P1P2	GCGACCTCGCCTAGCTGGTG	1	Arhgef39_+_43499758.23-P1P2	GTAGCTGGTGGGGCGGACAC	2	Arhgef39_+_43499768.23-P1P2|Arhgef39_+_43499758.23-P1P2
Olfr918	ENSMUST00000055099.1	Olfr918_-_38673696.23-ENSMUST00000055099.1	GCCCACTGGCAAACTTATTG	1	Olfr918_+_38673765.23-ENSMUST00000055099.1	GCTGATAGAACTGAGGTGTT	2	Olfr918_-_38673696.23-ENSMUST00000055099.1|Olfr918_+_38673765.23-ENSMUST00000055099.1
Oxsm	P2	Oxsm_-_16249292.23-P2	GcTCTGGCCGCAGGCCTCTG	1	Oxsm_-_16249295.23-P2	GTGGCCGCAGGCCTCTGCGG	2	Oxsm_-_16249292.23-P2|Oxsm_-_16249295.23-P2
BC049730	P1P2	BC049730_-_24709095.23-P1P2	GTTCCGAGGCGGCCAGTTAT	1	BC049730_+_24709043.23-P1P2	GTGCGTAGAAAGTGCGTGTT	2	BC049730_-_24709095.23-P1P2|BC049730_+_24709043.23-P1P2
Btnl2	P1P2	Btnl2_+_34354666.23-P1P2	GCATGCCCTGTCCAGCAGGT	1	Btnl2_-_34354662.23-P1P2	GTAGGCCACTGCCAGATGTC	2	Btnl2_+_34354666.23-P1P2|Btnl2_-_34354662.23-P1P2
Apopt1	P1P2	Apopt1_-_111713192.23-P1P2	GccgcccggcgTCCGTCCCA	1	Apopt1_-_111713135.23-P1P2	GCCCGTCAGCAGTGAGCCCG	2	Apopt1_-_111713192.23-P1P2|Apopt1_-_111713135.23-P1P2
Cyp2c55	P1P2	Cyp2c55_-_39006739.23-P1P2	GGATGTAACTGGAACTATGA	1	Cyp2c55_-_39006728.23-P1P2	GTCAGGCTTCAAGATGTAAC	2	Cyp2c55_-_39006739.23-P1P2|Cyp2c55_-_39006728.23-P1P2
Il1r2	P1P2	Il1r2_-_40084644.23-P1P2	GCTCCCCGTGAGCAGGGAAA	1	Il1r2_+_40084496.23-P1P2	GtgtgtgtgtgtCGCTAGAA	2	Il1r2_-_40084644.23-P1P2|Il1r2_+_40084496.23-P1P2
Olfml1	P1P2	Olfml1_+_107567312.23-P1P2	GCGCAGGCCTAGCTCAACAC	1	Olfml1_-_107567357.23-P1P2	GTGGACTGCACAGTCTATTA	2	Olfml1_+_107567312.23-P1P2|Olfml1_-_107567357.23-P1P2
Gm10094	ENSMUST00000074053.4	Gm10094_+_95825218.23-ENSMUST00000074053.4	Gaacagaaaacttctcatcg	1	Gm10094_-_95825314.23-ENSMUST00000074053.4	Ggtttctaggatgaggggat	2	Gm10094_+_95825218.23-ENSMUST00000074053.4|Gm10094_-_95825314.23-ENSMUST00000074053.4
Dio3	P1P2	Dio3_+_110279059.23-P1P2	GGCGGGCGCAGGCTGGTCGA	1	Dio3_+_110279056.23-P1P2	GGGCGCAGGCTGGTCGAGGG	2	Dio3_+_110279059.23-P1P2|Dio3_+_110279056.23-P1P2
Ptch2	P1P2	Ptch2_+_117095842.23-P1P2	GCCCGCGGGGCCCTAAGGAG	1	Ptch2_-_117095895.23-P1P2	GAGCCCGGGAGGCGAGGCAA	2	Ptch2_+_117095842.23-P1P2|Ptch2_-_117095895.23-P1P2
Ano6	P1P2	Ano6_+_95790679.23-P1P2	GGGGAGCGCTGCAGCCGCAG	1	Ano6_-_95790706.23-P1P2	GCGGCTGCAGCGCTCCCCGC	2	Ano6_+_95790679.23-P1P2|Ano6_-_95790706.23-P1P2
Pik3r1	P1P2	Pik3r1_-_101768333.23-P1P2	GCCTCTGCCAGTCTCCGGGA	1	Pik3r1_-_101768438.23-P1P2	GGATGCCCCGGGCGACTGGA	2	Pik3r1_-_101768333.23-P1P2|Pik3r1_-_101768438.23-P1P2
Morc4	P1P2	Morc4_-_139871797.23-P1P2	GCGGGAATGTGGCAAGAGGA	1	Morc4_-_139871753.23-P1P2	GGGGAAAGCGCGAGGGGAGG	2	Morc4_-_139871797.23-P1P2|Morc4_-_139871753.23-P1P2
Gm3336	P1P2	Gm3336_+_70718315.23-P1P2	GCCCAGGGATACCCCTTCTA	1	Gm3336_+_70718461.23-P1P2	GGGCGGATCGCAGGAATGAC	2	Gm3336_+_70718315.23-P1P2|Gm3336_+_70718461.23-P1P2
Gpr19	P1	Gpr19_-_134897992.23-P1	GTCGCGTTGTCTGGGGAAAG	1	Gpr19_-_134898012.23-P1	GGGCACAGAGGTCTTTACGG	2	Gpr19_-_134897992.23-P1|Gpr19_-_134898012.23-P1
Cbr1	P1P2	Cbr1_-_93607814.23-P1P2	GCACGCCCCCCGTAGGGAGG	1	Cbr1_-_93607709.23-P1P2	GaaaaaaCGGAGTTCAGGTA	2	Cbr1_-_93607814.23-P1P2|Cbr1_-_93607709.23-P1P2
Ccar2	P1P2	Ccar2_-_70153825.23-P1P2	GTGCCATCCCGCTCCAACTG	1	Ccar2_+_70153749.23-P1P2	GAAGAGGGAGGTACCATATC	2	Ccar2_-_70153825.23-P1P2|Ccar2_+_70153749.23-P1P2
Tctex1d2	P1P2	Tctex1d2_+_32419700.23-P1P2	GGGGTCTCACACGTGACGTG	1	Tctex1d2_+_32419651.23-P1P2	GTGGAGGCCGTGAGCCCGCT	2	Tctex1d2_+_32419700.23-P1P2|Tctex1d2_+_32419651.23-P1P2
Ffar4	P1P2	Ffar4_+_38096912.23-P1P2	GCTGGCCTGAACACCGTGGG	1	Ffar4_+_38096964.23-P1P2	GGGCGTAGGAGCTGCGTCCA	2	Ffar4_+_38096912.23-P1P2|Ffar4_+_38096964.23-P1P2
Ccdc88b	P1P2	Ccdc88b_-_6858383.23-P1P2	GCTGTAAGTTAGCTGAGGGG	1	Ccdc88b_-_6858392.23-P1P2	GAGCTGAGGGGAGGCCTACA	2	Ccdc88b_-_6858383.23-P1P2|Ccdc88b_-_6858392.23-P1P2
Adap2	P1P2	Adap2_-_80154029.23-P1P2	GGGGCGGGGCATATTATCCA	1	Adap2_+_80154036.23-P1P2	GGGCCCCGCCTCCAGGTCTT	2	Adap2_-_80154029.23-P1P2|Adap2_+_80154036.23-P1P2
Nr5a2	P1P2	Nr5a2_-_136960604.23-P1P2	GTGGTCACATGACCCTGTGC	1	Nr5a2_-_136960667.23-P1P2	GAAGAACTCTTGGCAGATAA	2	Nr5a2_-_136960604.23-P1P2|Nr5a2_-_136960667.23-P1P2
Ccdc84	P1P2	Ccdc84_+_44418174.23-P1P2	GCAAGCTGCCGGGTTTTCTG	1	Ccdc84_-_44418188.23-P1P2	GCACGCACCCGCAGAAAACC	2	Ccdc84_+_44418174.23-P1P2|Ccdc84_-_44418188.23-P1P2
Pkd1l1	ENSMUST00000178195.1	Pkd1l1_-_8950756.23-ENSMUST00000178195.1	Gttgtcaggttgatacaagt	1	Pkd1l1_-_8950742.23-ENSMUST00000178195.1	Gtgttggtctggattttgtc	2	Pkd1l1_-_8950756.23-ENSMUST00000178195.1|Pkd1l1_-_8950742.23-ENSMUST00000178195.1
Clec4d	P1P2	Clec4d_+_123261809.23-P1P2	GTTCTCAGGTAAGTGAAAGT	1	Clec4d_+_123261988.23-P1P2	GGGTAGTTTGAGGTAAAATG	2	Clec4d_+_123261809.23-P1P2|Clec4d_+_123261988.23-P1P2
Kif9	P1P2	Kif9_-_110476674.23-P1P2	GGGGCAAGGGCTCACGCTGA	1	Kif9_+_110476742.23-P1P2	GAGCGGGGCAGCGAGACTTC	2	Kif9_-_110476674.23-P1P2|Kif9_+_110476742.23-P1P2
Rad9b	P1P2	Rad9b_+_122354260.23-P1P2	GCGTGGGCGGGGCAAAGGAA	1	Rad9b_+_122354347.23-P1P2	GTGGCAAGAGCCTGTCTTAC	2	Rad9b_+_122354260.23-P1P2|Rad9b_+_122354347.23-P1P2
Asic5	ENSMUST00000029641.3	Asic5_-_81996621.23-ENSMUST00000029641.3	GTATCCACTGGTATGATCAG	1	Asic5_+_81996622.23-ENSMUST00000029641.3	GaaaagCTGTGACCTCACAG	2	Asic5_-_81996621.23-ENSMUST00000029641.3|Asic5_+_81996622.23-ENSMUST00000029641.3
Gm11435	P1P2	Gm11435_-_83522375.23-P1P2	GACAACCCATGTGAAGTACA	1	Gm11435_+_83522223.23-P1P2	GTGAGTCAGGAGGCCAACAG	2	Gm11435_-_83522375.23-P1P2|Gm11435_+_83522223.23-P1P2
Stam	P1P2	Stam_+_14074067.23-P1P2	GCGGGGCGTGTCGGGAATGT	1	Stam_-_14073987.23-P1P2	GGCAGAGGAAGAGACAGCGG	2	Stam_+_14074067.23-P1P2|Stam_-_14073987.23-P1P2
Amdhd2	P1P2	Amdhd2_+_24163860.23-P1P2	GAAAAGTTCTCGGATGTGAC	1	Amdhd2_+_24163822.23-P1P2	GTCTGTGGGCGGGCCTGGCA	2	Amdhd2_+_24163860.23-P1P2|Amdhd2_+_24163822.23-P1P2
Map2	P2	Map2_+_66321947.23-P2	GAGTCCCCGCAGTGGCGGAA	1	Map2_-_66321729.23-P2	GACCAGATGATGACATTCGT	2	Map2_+_66321947.23-P2|Map2_-_66321729.23-P2
Olfr462	ENSMUST00000049743.1	Olfr462_+_87890120.23-ENSMUST00000049743.1	GCACTGTGCGGATCTTGGGA	1	Olfr462_-_87890108.23-ENSMUST00000049743.1	GATCTTATAGCTGTCCAGAA	2	Olfr462_+_87890120.23-ENSMUST00000049743.1|Olfr462_-_87890108.23-ENSMUST00000049743.1
Tcp11l1	P1P2	Tcp11l1_-_104712337.23-P1P2	GCTGATGCGGGCCCGGGGAG	1	Tcp11l1_-_104712413.23-P1P2	GGAGGCGCCATGTTGAGGTT	2	Tcp11l1_-_104712337.23-P1P2|Tcp11l1_-_104712413.23-P1P2
Tnnc1	P1P2	Tnnc1_-_31208179.23-P1P2	GGCCCTAGGCAGATGATACA	1	Tnnc1_-_31208212.23-P1P2	GCCTGAGATTACAGGGACCA	2	Tnnc1_-_31208179.23-P1P2|Tnnc1_-_31208212.23-P1P2
Ikzf5	P1P2	Ikzf5_-_131410635.23-P1P2	GACTCAAAGGGGTGTGTGAG	1	Ikzf5_-_131410623.23-P1P2	GCAGTGGGCGGGGACTCAAA	2	Ikzf5_-_131410635.23-P1P2|Ikzf5_-_131410623.23-P1P2
2300005B03Rik	P1P2	2300005B03Rik_-_74746886.23-P1P2	GTTCCCTCCTCCATGGAGTA	1	2300005B03Rik_+_74746773.23-P1P2	GCCAGGTTGCAAGTGACTCA	2	2300005B03Rik_-_74746886.23-P1P2|2300005B03Rik_+_74746773.23-P1P2
Cbr4	P1P2	Cbr4_-_61487603.23-P1P2	GTACCCTCATAGAACTAACC	1	Cbr4_-_61487615.23-P1P2	GACTAACCAGGCTTGGGAAT	2	Cbr4_-_61487603.23-P1P2|Cbr4_-_61487615.23-P1P2
Gm10228	ENSMUST00000089105.2	Gm10228_-_89041545.23-ENSMUST00000089105.2	GCACCATGTGCTCATGCCAT	1	Gm10228_+_89041651.23-ENSMUST00000089105.2	GTGGTGTCAAGTTTTTTCAT	2	Gm10228_-_89041545.23-ENSMUST00000089105.2|Gm10228_+_89041651.23-ENSMUST00000089105.2
Etl4	P1P2	Etl4_-_20519444.23-P1P2	GGGGCTCCTGAGATTCAAGA	1	Etl4_+_20519559.23-P1P2	GTCTGCCGCCCAACAGGTGA	2	Etl4_-_20519444.23-P1P2|Etl4_+_20519559.23-P1P2
Slc25a28	P1P2	Slc25a28_+_43675026.23-P1P2	GAAGACGCTTCCAAGATCAA	1	Slc25a28_+_43675019.23-P1P2	GTTCCAAGATCAAAGGGGAA	2	Slc25a28_+_43675026.23-P1P2|Slc25a28_+_43675019.23-P1P2
B020031M17Rik	ENSMUST00000180768.1	B020031M17Rik_-_119950892.23-ENSMUST00000180768.1	Ggtgtgttagcttcaacgtc	1	B020031M17Rik_+_119951264.23-ENSMUST00000180768.1	Ggacagaggtacattctctc	2	B020031M17Rik_-_119950892.23-ENSMUST00000180768.1|B020031M17Rik_+_119951264.23-ENSMUST00000180768.1
Cpsf7	P1P2	Cpsf7_-_10525174.23-P1P2	GGATCTGAGGACTTCAGCGG	1	Cpsf7_-_10525150.23-P1P2	GCACTTCCGGGAATTCCGGG	2	Cpsf7_-_10525174.23-P1P2|Cpsf7_-_10525150.23-P1P2
Spag1	ENSMUST00000047348.3,ENSMUST00000171205.1	Spag1_-_36179248.23-ENSMUST00000047348.3,ENSMUST00000171205.1	GTGAGGGCAGAAATTGGCTG	1	Spag1_-_36179098.23-ENSMUST00000047348.3,ENSMUST00000171205.1	Ggaggcaggcgtatctacag	2	Spag1_-_36179248.23-ENSMUST00000047348.3,ENSMUST00000171205.1|Spag1_-_36179098.23-ENSMUST00000047348.3,ENSMUST00000171205.1
Btf3	P1P2	Btf3_+_98317113.23-P1P2	GACCGCGGGTCCCAGCTCTC	1	Btf3_-_98317146.23-P1P2	GGACCCGCGGTCGCCGTCCG	2	Btf3_+_98317113.23-P1P2|Btf3_-_98317146.23-P1P2
Gm17296	P1P2	Gm17296_+_126475136.23-P1P2	GGGGCAGGGTATGTGTGGGT	1	Gm17296_+_126475179.23-P1P2	GACACTCCCAACAAAGTTGA	2	Gm17296_+_126475136.23-P1P2|Gm17296_+_126475179.23-P1P2
4930415L06Rik	ENSMUST00000088146.2	4930415L06Rik_-_89933034.23-ENSMUST00000088146.2	GCATCAGAAGTATGGAACTT	1	4930415L06Rik_+_89933061.23-ENSMUST00000088146.2	GGTAGCCTTGGCCAAAACAT	2	4930415L06Rik_-_89933034.23-ENSMUST00000088146.2|4930415L06Rik_+_89933061.23-ENSMUST00000088146.2
Nckap1	P1P2	Nckap1_-_80581252.23-P1P2	GGCGGCGGCTGAGAACGAGT	1	Nckap1_+_80581406.23-P1P2	GGGAGCGGGGACAACTTCGG	2	Nckap1_-_80581252.23-P1P2|Nckap1_+_80581406.23-P1P2
Pggt1b	P1P2	Pggt1b_+_46280961.23-P1P2	GGGGCGAAGTGTTCCACTGA	1	Pggt1b_+_46280990.23-P1P2	GGAAAAGACTGTCCAAACTA	2	Pggt1b_+_46280961.23-P1P2|Pggt1b_+_46280990.23-P1P2
Olfr628	ENSMUST00000098193.1	Olfr628_-_103731695.23-ENSMUST00000098193.1	GGAAGAAAAATGAGGGAGAT	1	Olfr628_-_103731647.23-ENSMUST00000098193.1	GTGTAGTGTACATATTGTGT	2	Olfr628_-_103731695.23-ENSMUST00000098193.1|Olfr628_-_103731647.23-ENSMUST00000098193.1
Pard6g	P1P2	Pard6g_-_80046806.23-P1P2	GCGTGGGCGGGTCCTGATGG	1	Pard6g_-_80046803.23-P1P2	GTGGCGTGGGCGGGTCCTGA	2	Pard6g_-_80046806.23-P1P2|Pard6g_-_80046803.23-P1P2
Olfr850	ENSMUST00000077347.2	Olfr850_-_19478430.23-ENSMUST00000077347.2	Gagaaaccagcataaagatc	1	Olfr850_+_19478310.23-ENSMUST00000077347.2	GACTACTCCAAAAAGGTCTT	2	Olfr850_-_19478430.23-ENSMUST00000077347.2|Olfr850_+_19478310.23-ENSMUST00000077347.2
Olfr654	ENSMUST00000098173.2	Olfr654_+_104587220.23-ENSMUST00000098173.2	GTCAATGTGGAAGTGGGCAT	1	Olfr654_+_104587558.23-ENSMUST00000098173.2	GAGGAGAAATGGCTTTAATG	2	Olfr654_+_104587220.23-ENSMUST00000098173.2|Olfr654_+_104587558.23-ENSMUST00000098173.2
Tcn2	P1P2	Tcn2_+_3931925.23-P1P2	GGCCAGAGCAGCAACggtgc	1	Tcn2_-_3931960.23-P1P2	GGCTCTGGCTGCAGACATTC	2	Tcn2_+_3931925.23-P1P2|Tcn2_-_3931960.23-P1P2
Zfp655	P1P2	Zfp655_+_145231596.23-P1P2	GACACGGGATGCGGTCTCGT	1	Zfp655_-_145231527.23-P1P2	GGCGCCCTAATCAGCAGGGA	2	Zfp655_+_145231596.23-P1P2|Zfp655_-_145231527.23-P1P2
Gpc2	P1P2	Gpc2_-_138280144.23-P1P2	GAACACGGCCCGCACGGCGG	1	Gpc2_-_138280119.23-P1P2	GTGGAACGGCAACTCGGCAG	2	Gpc2_-_138280144.23-P1P2|Gpc2_-_138280119.23-P1P2
P2ry6	P1P2	P2ry6_+_100964488.23-P1P2	GTCCGACGGTCCCCATCGCT	1	P2ry6_-_100964500.23-P1P2	GCCCACTCAGCCTAGCGATG	2	P2ry6_+_100964488.23-P1P2|P2ry6_-_100964500.23-P1P2
Sult2a5	P1P2	Sult2a5_+_13623769.23-P1P2	GAGACTCAGGAAAACATAAT	1	Sult2a5_-_13623554.23-P1P2	GAAGAAGAGATCAAAAATAT	2	Sult2a5_+_13623769.23-P1P2|Sult2a5_-_13623554.23-P1P2
Cpvl	P1P2	Cpvl_+_53978712.23-P1P2	GAAGTTCTGTGGCTGTAGGT	1	Cpvl_-_53978739.23-P1P2	GTACAGCCACAGAACTTCAG	2	Cpvl_+_53978712.23-P1P2|Cpvl_-_53978739.23-P1P2
Cacna1f	P1P2	Cacna1f_+_7607041.23-P1P2	GGGGAAAAATGGTGTCAGTT	1	Cacna1f_+_7607052.23-P1P2	GGTCACGGGGCGGGGAAAAA	2	Cacna1f_+_7607041.23-P1P2|Cacna1f_+_7607052.23-P1P2
Igll1	P1P2	Igll1_+_16864153.23-P1P2	GTGCCCAGAGCTCTAGGGAT	1	Igll1_+_16864181.23-P1P2	GAGGGACCTGGATATCAGTC	2	Igll1_+_16864153.23-P1P2|Igll1_+_16864181.23-P1P2
Mfap1b	P1P2	Mfap1b_+_121474165.23-P1P2	GGGACCTTCCAGTTCTTGAG	1	Mfap1b_-_121474183.23-P1P2	GCAACCGCTCAAGAACTGGA	2	Mfap1b_+_121474165.23-P1P2|Mfap1b_-_121474183.23-P1P2
Fam111a	P1P2	Fam111a_-_12573370.23-P1P2	GCGGCCCTTAGAGACCAGGG	1	Fam111a_+_12573318.23-P1P2	GGGAAGCCCGCCAATCGAGT	2	Fam111a_-_12573370.23-P1P2|Fam111a_+_12573318.23-P1P2
Sla2	P1P2	Sla2_+_156887359.23-P1P2	GGACCTCCAGCCTGAGGCAT	1	Sla2_+_156887287.23-P1P2	GGGCAAGGTGGTTCCTCCAT	2	Sla2_+_156887359.23-P1P2|Sla2_+_156887287.23-P1P2
Htr2c	P1P2	Htr2c_+_146962338.23-P1P2	GGGACCCTGAGCTGTGGCGT	1	Htr2c_+_146962344.23-P1P2	GGGCAGGGGACCCTGAGCTG	2	Htr2c_+_146962338.23-P1P2|Htr2c_+_146962344.23-P1P2
Gm1110	P1P2	Gm1110_-_26923128.23-P1P2	GTGTGGGCACAGGACCTCGT	1	Gm1110_+_26923291.23-P1P2	GCAGGAGAGGTCATTCATGA	2	Gm1110_-_26923128.23-P1P2|Gm1110_+_26923291.23-P1P2
Nbeal1	P2	Nbeal1_-_60180504.23-P2	GGGGCCGGGTAAATCCCCAG	1	Nbeal1_+_60180461.23-P2	GTCCGGCAGCCGCTCCTCGA	2	Nbeal1_-_60180504.23-P2|Nbeal1_+_60180461.23-P2
Fgf22	P1P2	Fgf22_+_79754942.23-P1P2	GGGGGGCGGGTACAGGTGCA	1	Fgf22_+_79755006.23-P1P2	GGGGCCTCGACTCCAATTGC	2	Fgf22_+_79754942.23-P1P2|Fgf22_+_79755006.23-P1P2
Wtip	P1P2	Wtip_-_34133408.23-P1P2	GGCGGCCTCTGGAATGTGGG	1	Wtip_+_34133305.23-P1P2	GCCTGCGCGCGGTCTCGAAG	2	Wtip_-_34133408.23-P1P2|Wtip_+_34133305.23-P1P2
Tnnc2	P1P2	Tnnc2_-_164780061.23-P1P2	GAAGGAGGGCACAGCAGAAT	1	Tnnc2_+_164779934.23-P1P2	GGCCCTCCTCCTAAGAATCC	2	Tnnc2_-_164780061.23-P1P2|Tnnc2_+_164779934.23-P1P2
Tmx3	P1P2	Tmx3_+_90510014.23-P1P2	GAAAGAGCTCGGAAGAGCGT	1	Tmx3_+_90509945.23-P1P2	GTCTTCCCGGAATGCACGTA	2	Tmx3_+_90510014.23-P1P2|Tmx3_+_90509945.23-P1P2
Crxos1	P1P2	Crxos1_-_15882489.23-P1P2	Ggggacctggggatacttgg	1	Crxos1_-_15882558.23-P1P2	GTTCAGTGGGACACTGATGA	2	Crxos1_-_15882489.23-P1P2|Crxos1_-_15882558.23-P1P2
Tdo2	P1P2	Tdo2_-_81975877.23-P1P2	GAACTGAGCCTCTGTAACTT	1	Tdo2_+_81975811.23-P1P2	GCGGGCTAAGAGTGTAAGCT	2	Tdo2_-_81975877.23-P1P2|Tdo2_+_81975811.23-P1P2
Ntng1	P1P2	Ntng1_-_110143776.23-P1P2	GGAAGCCGCAGCCCTCGGAG	1	Ntng1_+_110144096.23-P1P2	GCTCCCAGTTAGGGTGAAGA	2	Ntng1_-_110143776.23-P1P2|Ntng1_+_110144096.23-P1P2
Mrgpra1	P1P2	Mrgpra1_-_47354385.23-P1P2	GTTGTAAGTGGGAGTATGTA	1	Mrgpra1_+_47354347.23-P1P2	GTACAAATAGGACTCTGAGA	2	Mrgpra1_-_47354385.23-P1P2|Mrgpra1_+_47354347.23-P1P2
Zfp54	P1P2	Zfp54_-_21423101.23-P1P2	GGTGGGGAGTCTGTGGAGAG	1	Zfp54_+_21423142.23-P1P2	GGTCCCTCCCTATCAGTCTC	2	Zfp54_-_21423101.23-P1P2|Zfp54_+_21423142.23-P1P2
Mterfd3	P1P2	Mterfd3_+_85128190.23-P1P2	GGGCAATAGACCCTGTAGTG	1	Mterfd3_-_85128179.23-P1P2	GACTGTGTACAGGCTCCCGT	2	Mterfd3_+_85128190.23-P1P2|Mterfd3_-_85128179.23-P1P2
Akirin2	P1P2	Akirin2_-_34550578.23-P1P2	GGGGCCCGCCCCCGGTGCGC	1	Akirin2_+_34550495.23-P1P2	GCAGGGATCGGCCTGAAAGG	2	Akirin2_-_34550578.23-P1P2|Akirin2_+_34550495.23-P1P2
Psmd10	P1P2	Psmd10_+_140956914.23-P1P2	GTCCACCGGCAACTTGACTA	1	Psmd10_-_140956851.23-P1P2	GCCAGGCCTGGAGGCGTCTT	2	Psmd10_+_140956914.23-P1P2|Psmd10_-_140956851.23-P1P2
Stat6	P1P2	Stat6_+_127642860.23-P1P2	GGGGAAGCACGTAGTGGGGA	1	Stat6_+_127642864.23-P1P2	GGGTGGGGAAGCACGTAGTG	2	Stat6_+_127642860.23-P1P2|Stat6_+_127642864.23-P1P2
Dcaf4	P2	Dcaf4_+_83525580.23-P2	GCCCGCCAGGGGAGTCACAG	1	Dcaf4_-_83525715.23-P2	GGGGTGTCTTGGAAAGACAT	2	Dcaf4_+_83525580.23-P2|Dcaf4_-_83525715.23-P2
Trim27	P1P2	Trim27_-_21180066.23-P1P2	GACAGCCACGACCGACTCCC	1	Trim27_+_21180177.23-P1P2	GCGGCCGCGCAGACTCCTCA	2	Trim27_-_21180066.23-P1P2|Trim27_+_21180177.23-P1P2
Midn	P2	Midn_-_80148151.23-P2	GTCCAGGCCAGCAGGCGGTG	1	Midn_-_80148117.23-P2	GTGGGTGCTGCGAAGCCCTA	2	Midn_-_80148151.23-P2|Midn_-_80148117.23-P2
Erich2	ENSMUST00000100041.2,ENSMUST00000134607.1	Erich2_+_70508551.23-ENSMUST00000100041.2,ENSMUST00000134607.1	GACCTTCTTAAGGGCCCTCT	1	Erich2_-_70508805.23-ENSMUST00000100041.2,ENSMUST00000134607.1	GGAAGCATAAGACCTCTAAA	2	Erich2_+_70508551.23-ENSMUST00000100041.2,ENSMUST00000134607.1|Erich2_-_70508805.23-ENSMUST00000100041.2,ENSMUST00000134607.1
Slc35d3	P1P2	Slc35d3_-_19851704.23-P1P2	GGAGACACGTCGGTGCTGGA	1	Slc35d3_+_19851652.23-P1P2	GGCAGCGCTGAGAGAGACCG	2	Slc35d3_-_19851704.23-P1P2|Slc35d3_+_19851652.23-P1P2
Fgfr1op	P1P2	Fgfr1op_+_8165014.23-P1P2	GCGGCGGGGTCTGCTGTCTC	1	Fgfr1op_-_8165049.23-P1P2	GCCCCGCCGCCGAGCAAAAC	2	Fgfr1op_+_8165014.23-P1P2|Fgfr1op_-_8165049.23-P1P2
Lrrc46	P1P2	Lrrc46_+_97041626.23-P1P2	GCCGGGGCGGGAGACCTCCA	1	Lrrc46_-_97041492.23-P1P2	GGCGCCACGCCCACTATTTC	2	Lrrc46_+_97041626.23-P1P2|Lrrc46_-_97041492.23-P1P2
1700040L02Rik	P1P2	1700040L02Rik_-_68542021.23-P1P2	GCAGAAAGCTAACTCTAAAA	1	1700040L02Rik_-_68542058.23-P1P2	GTGGGGGCTCTGGCTCTTAA	2	1700040L02Rik_-_68542021.23-P1P2|1700040L02Rik_-_68542058.23-P1P2
Cpt1b	P1P2	Cpt1b_-_89426041.23-P1P2	GGCTGGAAGGTCTGGGACTG	1	Cpt1b_-_89425930.23-P1P2	GGACACCCACTCCCAAATTG	2	Cpt1b_-_89426041.23-P1P2|Cpt1b_-_89425930.23-P1P2
Adipor1	P1P2	Adipor1_-_134415341.23-P1P2	GCCAGCGATTGGTCAGATCA	1	Adipor1_+_134415289.23-P1P2	GTCCCAGCTTGGCCCTACAC	2	Adipor1_-_134415341.23-P1P2|Adipor1_+_134415289.23-P1P2
Wfdc8	P1P2	Wfdc8_-_164613863.23-P1P2	GGAACCTGCGCTGGCAGAGG	1	Wfdc8_-_164613587.23-P1P2	GGGAAGGGAACCGCCAGCAG	2	Wfdc8_-_164613863.23-P1P2|Wfdc8_-_164613587.23-P1P2
Mcm2	P1P2	Mcm2_+_88898858.23-P1P2	GCTAGGTGTGCAGGAGGCGA	1	Mcm2_-_88898852.23-P1P2	GCCCGCCCACAGCTTTCAAA	2	Mcm2_+_88898858.23-P1P2|Mcm2_-_88898852.23-P1P2
Tbl2	P1P2	Tbl2_-_135149557.23-P1P2	GGGCCAGGTCGCTTCCCATA	1	Tbl2_-_135149537.23-P1P2	GGCCCTGCAGAGCGCTCCAA	2	Tbl2_-_135149557.23-P1P2|Tbl2_-_135149537.23-P1P2
St6galnac4	P1P2	St6galnac4_+_32586941.23-P1P2	GGGCGAGGTCTCGACGTCGA	1	St6galnac4_+_32586937.23-P1P2	GAGGTCTCGACGTCGAGGGC	2	St6galnac4_+_32586941.23-P1P2|St6galnac4_+_32586937.23-P1P2
Mag	P1P2	Mag_+_30914993.23-P1P2	GCCCTAGCCCGATGGTGACA	1	Mag_-_30915019.23-P1P2	GTCACCATCGGGCTAGGGCT	2	Mag_+_30914993.23-P1P2|Mag_-_30915019.23-P1P2
Cd34	P1P2	Cd34_-_194938793.23-P1P2	GGAAGTAGGAACTACGAGAG	1	Cd34_-_194938763.23-P1P2	GAGGCAGCCAAGATGACACA	2	Cd34_-_194938793.23-P1P2|Cd34_-_194938763.23-P1P2
Pramel1	P1P2	Pramel1_-_143394392.23-P1P2	GGGGCCCGAGCTTATTTCAG	1	Pramel1_+_143394240.23-P1P2	Gggagggagacttacagcgt	2	Pramel1_-_143394392.23-P1P2|Pramel1_+_143394240.23-P1P2
Dhrs3	P1P2	Dhrs3_-_144892560.23-P1P2	GGCCCCGCGGACGAAGTAAT	1	Dhrs3_-_144892865.23-P1P2	GCCCAAGAATAGCAATGAGT	2	Dhrs3_-_144892560.23-P1P2|Dhrs3_-_144892865.23-P1P2
Arhgap9	P2	Arhgap9_+_127323559.23-P2	GAGAGACTACGCTAGAGCTA	1	Arhgap9_-_127323537.23-P2	GTGTACACTCTCTCTTTCAC	2	Arhgap9_+_127323559.23-P2|Arhgap9_-_127323537.23-P2
Nlrp9a	ENSMUST00000108387.2,ENSMUST00000071780.3	Nlrp9a_-_26534788.23-ENSMUST00000108387.2,ENSMUST00000071780.3	GGGCAAAAAGCTGTTCAGAT	1	Nlrp9a_-_26534766.23-ENSMUST00000108387.2,ENSMUST00000071780.3	GATAACCTGTCTCTCTCATT	2	Nlrp9a_-_26534788.23-ENSMUST00000108387.2,ENSMUST00000071780.3|Nlrp9a_-_26534766.23-ENSMUST00000108387.2,ENSMUST00000071780.3
Psg18	P1P2	Psg18_-_18355271.23-P1P2	GGAAGCTGGGCTTTTGCAGC	1	Psg18_+_18355539.23-P1P2	GGGGAGACTAGAGAGCAGTT	2	Psg18_-_18355271.23-P1P2|Psg18_+_18355539.23-P1P2
Ybx2	P1P2	Ybx2_+_69935802.23-P1P2	GAGCCGAGGCCAATCGCAGT	1	Ybx2_+_69935736.23-P1P2	GCGTAGCCGCGCAGCCCCCC	2	Ybx2_+_69935802.23-P1P2|Ybx2_+_69935736.23-P1P2
Prkar2a	P1P2	Prkar2a_-_108692053.23-P1P2	GCCTCCCGCACCTTGACCAT	1	Prkar2a_-_108692151.23-P1P2	GGCCGCGTGCGTCACAACCC	2	Prkar2a_-_108692053.23-P1P2|Prkar2a_-_108692151.23-P1P2
Amn	P2	Amn_+_111274448.23-P2	GGGCACGCGCTCGGCGTCCA	1	Amn_-_111274594.23-P2	GCAGGTGAGCAGGCACGGGA	2	Amn_+_111274448.23-P2|Amn_-_111274594.23-P2
Krt83	P1P2	Krt83_+_101439069.23-P1P2	GTCAGGGTGGAGAACCAGGT	1	Krt83_+_101438819.23-P1P2	GCTCCCTCCTGCACGATATA	2	Krt83_+_101439069.23-P1P2|Krt83_+_101438819.23-P1P2
Ppp2r4	P1P2	Ppp2r4_-_30415877.23-P1P2	GCATGCACAAAGAAGATGAC	1	Ppp2r4_-_30415829.23-P1P2	GAGAACACAACTGTTGACTG	2	Ppp2r4_-_30415877.23-P1P2|Ppp2r4_-_30415829.23-P1P2
Ilvbl	P1P2	Ilvbl_-_78575023.23-P1P2	GAGGTGTGGCCCAGGTCCGG	1	Ilvbl_+_78574781.23-P1P2	GCCTCCTCAACGCTGGACTG	2	Ilvbl_-_78575023.23-P1P2|Ilvbl_+_78574781.23-P1P2
Mtss1l	P1P2	Mtss1l_-_110721305.23-P1P2	GcccTCTTGCCGGACCAGTC	1	Mtss1l_-_110721222.23-P1P2	GTCCGCTCCCGCTGGAGGGT	2	Mtss1l_-_110721305.23-P1P2|Mtss1l_-_110721222.23-P1P2
Prr5l	P1P2	Prr5l_+_101797752.23-P1P2	GAAACCACAGCGATGTGCAC	1	Prr5l_-_101797912.23-P1P2	GTGGTCCTAAAAAGCAGGGG	2	Prr5l_+_101797752.23-P1P2|Prr5l_-_101797912.23-P1P2
Slitrk5	P1P2	Slitrk5_+_111674852.23-P1P2	GGAGCCCAGTGGCCGGTAGG	1	Slitrk5_+_111674836.23-P1P2	GAGGTGGCAGCCGAGGGCGA	2	Slitrk5_+_111674852.23-P1P2|Slitrk5_+_111674836.23-P1P2
Myo19	P1P2	Myo19_+_84880207.23-P1P2	GAGGTGAGGTCTATTGAGTC	1	Myo19_+_84880054.23-P1P2	GAACCCGCCTCGCCCTGGGG	2	Myo19_+_84880207.23-P1P2|Myo19_+_84880054.23-P1P2
Ubn2	P1P2	Ubn2_+_38433794.23-P1P2	GCGGAAGTGACGTCACAGAC	1	Ubn2_+_38433813.23-P1P2	GTGGAGGCCAGACAGCTCGG	2	Ubn2_+_38433794.23-P1P2|Ubn2_+_38433813.23-P1P2
Prr18	P1P2	Prr18_-_8340552.23-P1P2	GAGGAGAGACTTGGGGTACT	1	Prr18_+_8340648.23-P1P2	GGAGGAGCGCACGCTGGCAA	2	Prr18_-_8340552.23-P1P2|Prr18_+_8340648.23-P1P2
Erbb2	P1P2	Erbb2_-_98412325.23-P1P2	GAAGCGAGGCGTCAGGGCAC	1	Erbb2_-_98412411.23-P1P2	GTTGCTGGAATGCAGTTGGA	2	Erbb2_-_98412325.23-P1P2|Erbb2_-_98412411.23-P1P2
Pddc1	P1P2	Pddc1_-_141414274.23-P1P2	GTGAGTGGCAAGCATGCGAg	1	Pddc1_-_141414156.23-P1P2	GCGCATGCGTGAGGCACGAA	2	Pddc1_-_141414274.23-P1P2|Pddc1_-_141414156.23-P1P2
Mrgprx2	P1P2	Mrgprx2_+_48499410.23-P1P2	GTACTGCCACTAATAGGGAA	1	Mrgprx2_+_48499477.23-P1P2	Gcttaggagtcatggaggtt	2	Mrgprx2_+_48499410.23-P1P2|Mrgprx2_+_48499477.23-P1P2
Dmrtb1	P1P2	Dmrtb1_-_107683740.23-P1P2	GCGGTCGCGCAGTCCCCCGG	1	Dmrtb1_-_107683761.23-P1P2	GGCCCCTGGTCCAGGCTGGA	2	Dmrtb1_-_107683740.23-P1P2|Dmrtb1_-_107683761.23-P1P2
Catsperg2	P1P2	Catsperg2_-_29727102.23-P1P2	GGGCCCAAGGCCTTGAGAGC	1	Catsperg2_+_29727072.23-P1P2	GAAGGCCTTGGGCCCGTGCT	2	Catsperg2_-_29727102.23-P1P2|Catsperg2_+_29727072.23-P1P2
BC027582	ENSMUST00000169286.1	BC027582_-_103732805.23-ENSMUST00000169286.1	GAAGGGGCCTGGAAAATCTG	1	BC027582_+_103732751.23-ENSMUST00000169286.1	GGTGTACAGAAGCTGTCCTG	2	BC027582_-_103732805.23-ENSMUST00000169286.1|BC027582_+_103732751.23-ENSMUST00000169286.1
Nipsnap3a	P1P2	Nipsnap3a_-_52989037.23-P1P2	GTGCTCTGTGATGAAGGCGA	1	Nipsnap3a_+_52989127.23-P1P2	GTCCCCCGTCCCGCCCTGTC	2	Nipsnap3a_-_52989037.23-P1P2|Nipsnap3a_+_52989127.23-P1P2
Pnrc2	P1P2	Pnrc2_+_135873717.23-P1P2	GTCTCCCTGTAGAGGGAAGG	1	Pnrc2_+_135873709.23-P1P2	GTAGAGGGAAGGAGGCTTGG	2	Pnrc2_+_135873717.23-P1P2|Pnrc2_+_135873709.23-P1P2
Dsc1	P1P2	Dsc1_+_20114968.23-P1P2	GGTGGGAGGACATAATAACT	1	Dsc1_+_20115009.23-P1P2	GGGGGCAAGGCAGGTTATTA	2	Dsc1_+_20114968.23-P1P2|Dsc1_+_20115009.23-P1P2
Dph1	P1P2	Dph1_-_75190584.23-P1P2	GTAGCAGGGCGGTGACTAAA	1	Dph1_-_75190614.23-P1P2	GGCGGTGCTGCAATGGGCAC	2	Dph1_-_75190584.23-P1P2|Dph1_-_75190614.23-P1P2
Olfr273	ENSMUST00000107670.1	Olfr273_-_52858756.23-ENSMUST00000107670.1	GATAGCACTGGTGGTAACAA	1	Olfr273_+_52858599.23-ENSMUST00000107670.1	GCGACTCCGTAAATACTGCA	2	Olfr273_-_52858756.23-ENSMUST00000107670.1|Olfr273_+_52858599.23-ENSMUST00000107670.1
Ppp3r2	P1P2	Ppp3r2_-_49682130.23-P1P2	GGGGACCGGAGGACAAAGTG	1	Ppp3r2_-_49682160.23-P1P2	GGCGAGGGATAGCTGTAACT	2	Ppp3r2_-_49682130.23-P1P2|Ppp3r2_-_49682160.23-P1P2
Vmn1r174	ENSMUST00000167551.1	Vmn1r174_-_23753573.23-ENSMUST00000167551.1	GAGATCTTGAATTTAAATGA	1	Vmn1r174_+_23753505.23-ENSMUST00000167551.1	GAGAAATGCAGATTTGCCAC	2	Vmn1r174_-_23753573.23-ENSMUST00000167551.1|Vmn1r174_+_23753505.23-ENSMUST00000167551.1
Vmn2r67	ENSMUST00000168730.1	Vmn2r67_+_85156263.23-ENSMUST00000168730.1	GAAAACGTGGTTTGATTAAC	1	Vmn2r67_-_85156150.23-ENSMUST00000168730.1	GTATGTTCACATAACAAATA	2	Vmn2r67_+_85156263.23-ENSMUST00000168730.1|Vmn2r67_-_85156150.23-ENSMUST00000168730.1
Emc9	P1P2	Emc9_+_55585376.23-P1P2	GGAGGCGGGACTCTTGGTTA	1	Emc9_-_55585416.23-P1P2	GCTCCGCAGTACTCTCTGAT	2	Emc9_+_55585376.23-P1P2|Emc9_-_55585416.23-P1P2
Apc2	P2	Apc2_+_80298929.23-P2	GGGAGCTTAGGGGCCGATGG	1	Apc2_+_80299013.23-P2	GGGAAGACGAGCTGGTGCTA	2	Apc2_+_80298929.23-P2|Apc2_+_80299013.23-P2
Mlc1	P1P2	Mlc1_-_88978734.23-P1P2	GGGAGCTTTCCCAATAGGAA	1	Mlc1_+_88978740.23-P1P2	GGAGCAGTGAGGGGGACCAA	2	Mlc1_-_88978734.23-P1P2|Mlc1_+_88978740.23-P1P2
St3gal1	ENSMUST00000092640.5	St3gal1_+_67114192.23-ENSMUST00000092640.5	GATTGTCCAGGGGTTCGCTC	1	St3gal1_-_67114312.23-ENSMUST00000092640.5	GCTAGGCTGTTCCAAGGAAT	2	St3gal1_+_67114192.23-ENSMUST00000092640.5|St3gal1_-_67114312.23-ENSMUST00000092640.5
Ptprg	P1P2	Ptprg_-_11553340.23-P1P2	GGCCCTAGGCACGCCTGGAG	1	Ptprg_-_11553367.23-P1P2	GAGTGCAAGTCCTTGGAAGC	2	Ptprg_-_11553340.23-P1P2|Ptprg_-_11553367.23-P1P2
Mab21l3	P1P2	Mab21l3_-_101836356.23-P1P2	GCTCCCTCCTCCAGGCGCTG	1	Mab21l3_+_101836457.23-P1P2	GAAAAGCAGGTGGAAAGTCA	2	Mab21l3_-_101836356.23-P1P2|Mab21l3_+_101836457.23-P1P2
Nr2f1	P1P2	Nr2f1_-_78200565.23-P1P2	GTGGTCAGAGCCCTGAATGG	1	Nr2f1_+_78200608.23-P1P2	GCCAACCAATGGCGTGAAGG	2	Nr2f1_-_78200565.23-P1P2|Nr2f1_+_78200608.23-P1P2
Rgs10	P1P2	Rgs10_+_128418286.23-P1P2	GGCCCTGCGCGGGTAACTGA	1	Rgs10_+_128418356.23-P1P2	GTCTCCAGGCCGCGAGGGGA	2	Rgs10_+_128418286.23-P1P2|Rgs10_+_128418356.23-P1P2
Taar3	ENSMUST00000045152.4	Taar3_-_23949132.23-ENSMUST00000045152.4	GCAATATAGCAGAGTGAAGG	1	Taar3_+_23949321.23-ENSMUST00000045152.4	Ggagttcaattccaagtaac	2	Taar3_-_23949132.23-ENSMUST00000045152.4|Taar3_+_23949321.23-ENSMUST00000045152.4
Zfp777	P1P2	Zfp777_-_48048812.23-P1P2	GGCGCGCTGGGTCTGGAGGC	1	Zfp777_-_48048669.23-P1P2	GACACGCCCTGAGCCCGTCG	2	Zfp777_-_48048812.23-P1P2|Zfp777_-_48048669.23-P1P2
Krt80	P1	Krt80_+_101370258.23-P1	GGAAAGCTGTGGTACGGGGA	1	Krt80_-_101370417.23-P1	GCGGGTGGTCAGTGCCAAGA	2	Krt80_+_101370258.23-P1|Krt80_-_101370417.23-P1
Wrnip1	P1P2	Wrnip1_-_32801895.23-P1P2	GCCACAGAAAGGCTCTTCCC	1	Wrnip1_-_32801915.23-P1P2	GGGGACCGAAGAAGACGAGA	2	Wrnip1_-_32801895.23-P1P2|Wrnip1_-_32801915.23-P1P2
Mkl2	P2	Mkl2_-_13358129.23-P2	GAACTTCATGAGTAATGCAT	1	Mkl2_-_13357994.23-P2	GCCCACAGAGGAACGTGGGA	2	Mkl2_-_13358129.23-P2|Mkl2_-_13357994.23-P2
Defb13	P1P2	Defb13_-_21946658.23-P1P2	GTGGCCCACTCGTCACTCAA	1	Defb13_-_21946530.23-P1P2	GCCTGGAGATGGAACATGAA	2	Defb13_-_21946658.23-P1P2|Defb13_-_21946530.23-P1P2
Ric8	P1P2	Ric8_-_140857236.23-P1P2	GCTAGAGAGGAGGGCTCAAA	1	Ric8_+_140857329.23-P1P2	GCGAACCCAAGGGTGTGTAC	2	Ric8_-_140857236.23-P1P2|Ric8_+_140857329.23-P1P2
Dnph1	P1P2	Dnph1_-_46496668.23-P1P2	GTGGGGAGGGGCAGGTCACG	1	Dnph1_-_46496701.23-P1P2	GCTAATGAGCGGGTTGGCTC	2	Dnph1_-_46496668.23-P1P2|Dnph1_-_46496701.23-P1P2
Smco3	P1P2	Smco3_-_136835501.23-P1P2	GCTGGGTCCCACTGCCCATC	1	Smco3_+_136835494.23-P1P2	GGAAATGGCTGTGAACCAGA	2	Smco3_-_136835501.23-P1P2|Smco3_+_136835494.23-P1P2
Dhx58	P1P2	Dhx58_+_100704608.23-P1P2	GGACCCCTGCAATATATAGT	1	Dhx58_-_100704387.23-P1P2	GGCTGACAGTCACTGCTCCT	2	Dhx58_+_100704608.23-P1P2|Dhx58_-_100704387.23-P1P2
Prmt5	P1P2	Prmt5_-_54517488.23-P1P2	GTACAGCTCCAGAGCGGAGG	1	Prmt5_+_54517516.23-P1P2	GCACGTCACTGTGAGAATTG	2	Prmt5_-_54517488.23-P1P2|Prmt5_+_54517516.23-P1P2
Ccdc149	P1P2	Ccdc149_+_52471714.23-P1P2	GGGAGTCTGGGGTTATGTGA	1	Ccdc149_-_52471694.23-P1P2	GCAGCTGTGTCTCCTAGGGA	2	Ccdc149_+_52471714.23-P1P2|Ccdc149_-_52471694.23-P1P2
Psmc3	P1P2	Psmc3_+_91053964.23-P1P2	GGCGGGGCTTGCTGCACAAC	1	Psmc3_+_91053982.23-P1P2	GGGCCGGCGTACAGGCGGGG	2	Psmc3_+_91053964.23-P1P2|Psmc3_+_91053982.23-P1P2
Pdcd2	P1P2	Pdcd2_+_15527429.23-P1P2	GAACAGTGACAGTTCGATGG	1	Pdcd2_-_15527457.23-P1P2	GCGAACTGTCACTGTTTCTG	2	Pdcd2_+_15527429.23-P1P2|Pdcd2_-_15527457.23-P1P2
Gm6531	ENSMUST00000076896.5	Gm6531_+_85171250.23-ENSMUST00000076896.5	Gtggtcatacagacgtccga	1	Gm6531_+_85171235.23-ENSMUST00000076896.5	Gccgaagggagagaaagaac	2	Gm6531_+_85171250.23-ENSMUST00000076896.5|Gm6531_+_85171235.23-ENSMUST00000076896.5
Spr	P1P2	Spr_+_85137936.23-P1P2	GAGAAAGGGGCTGAGTTTGT	1	Spr_+_85137891.23-P1P2	GAAGCGCTGGGAAGGGGATT	2	Spr_+_85137936.23-P1P2|Spr_+_85137891.23-P1P2
Rpl41	P1P2	Rpl41_+_128549187.23-P1P2	GTCGAGCAGCCCCGCCCTAA	1	Rpl41_+_128549369.23-P1P2	GAACTCCCATGAAGCAACGA	2	Rpl41_+_128549187.23-P1P2|Rpl41_+_128549369.23-P1P2
Trak1	ENSMUST00000045903.6	Trak1_-_121366684.23-ENSMUST00000045903.6	GAGCTCTTTGTGGATTCTGA	1	Trak1_+_121366561.23-ENSMUST00000045903.6	GTGGCGGGGAGGGATTACAG	2	Trak1_-_121366684.23-ENSMUST00000045903.6|Trak1_+_121366561.23-ENSMUST00000045903.6
Mcm9	P1P2	Mcm9_-_53630221.23-P1P2	GGAACGCGGGGTGGAGACTA	1	Mcm9_-_53630086.23-P1P2	GGGGCCGGACAAGACGTCTG	2	Mcm9_-_53630221.23-P1P2|Mcm9_-_53630086.23-P1P2
Xpnpep2	P1P2	Xpnpep2_-_48108771.23-P1P2	GAAACAGCTTGCTGGAGGGT	1	Xpnpep2_-_48108813.23-P1P2	GTAGGGTAGAGCTGCTGAAG	2	Xpnpep2_-_48108771.23-P1P2|Xpnpep2_-_48108813.23-P1P2
Dcaf13	P1P2	Dcaf13_-_39112763.23-P1P2	GGCTGCGCGCGCTCGCCCTC	1	Dcaf13_+_39112732.23-P1P2	GAGCGCGCGCAGCTGTGGGC	2	Dcaf13_-_39112763.23-P1P2|Dcaf13_+_39112732.23-P1P2
Cnnm2	P1P2	Cnnm2_+_46761601.23-P1P2	GGAGGAACCCCCGGGCTCGA	1	Cnnm2_+_46761450.23-P1P2	GCACCAATGGCACGGGAGGT	2	Cnnm2_+_46761601.23-P1P2|Cnnm2_+_46761450.23-P1P2
Ercc5	P1P2	Ercc5_+_44147687.23-P1P2	GGGCTTCCAAGTGAACGCGA	1	Ercc5_-_44147754.23-P1P2	GGGGAGAAATCACTCGCGAC	2	Ercc5_+_44147687.23-P1P2|Ercc5_-_44147754.23-P1P2
Creb3	P1P2	Creb3_-_43562509.23-P1P2	GAATCCCCGCCCTGGGGCGT	1	Creb3_+_43562482.23-P1P2	GCCCCAGGGCGGGGATTCTG	2	Creb3_-_43562509.23-P1P2|Creb3_+_43562482.23-P1P2
Synpr	P1P2	Synpr_-_13284646.23-P1P2	GGATCTGGACCAATGTGCGA	1	Synpr_+_13284596.23-P1P2	GCGGGCGCGCAATCTGCTCC	2	Synpr_-_13284646.23-P1P2|Synpr_+_13284596.23-P1P2
Gpx7	P1P2	Gpx7_+_108406829.23-P1P2	GAACCAGCGCAGAGCAGCTA	1	Gpx7_+_108406997.23-P1P2	Gaaactggggctcagagtgg	2	Gpx7_+_108406829.23-P1P2|Gpx7_+_108406997.23-P1P2
Fam188a	P1P2	Fam188a_-_12419609.23-P1P2	GTGTCCTGTTTGGGGATAGT	1	Fam188a_+_12419591.23-P1P2	GAGTCCAACTATCCCCAAAC	2	Fam188a_-_12419609.23-P1P2|Fam188a_+_12419591.23-P1P2
Zfp275	P1P2	Zfp275_+_73342461.23-P1P2	GAGGTGGGATAGATGAGACT	1	Zfp275_+_73342547.23-P1P2	GTCGGTCCCGCCCGGCCTGT	2	Zfp275_+_73342461.23-P1P2|Zfp275_+_73342547.23-P1P2
Tmbim6	P1P2	Tmbim6_-_99393084.23-P1P2	GCAAACCCGGAGTGAGGGAT	1	Tmbim6_-_99392786.23-P1P2	GGAGGCCTATTGCTAAGGTG	2	Tmbim6_-_99393084.23-P1P2|Tmbim6_-_99392786.23-P1P2
Mgat1	P1P2	Mgat1_-_49250515.23-P1P2	GGCAGGGCGGGGACCAACAG	1	Mgat1_-_49250311.23-P1P2	GCAAGGCTCAGGGTGTGAGT	2	Mgat1_-_49250515.23-P1P2|Mgat1_-_49250311.23-P1P2
Eed	P1P2	Eed_-_89980998.23-P1P2	GGCAAACGAACGAAAGTCTG	1	Eed_+_89980795.23-P1P2	GTCGGTGCAAAGTGTCGAGA	2	Eed_-_89980998.23-P1P2|Eed_+_89980795.23-P1P2
9130019O22Rik	P1P2	9130019O22Rik_+_127387283.23-P1P2	GCAGGCAGGGTGTCTCACGT	1	9130019O22Rik_-_127387327.23-P1P2	GGAGGACCACATGCAGTTGA	2	9130019O22Rik_+_127387283.23-P1P2|9130019O22Rik_-_127387327.23-P1P2
Atp4a	P2	Atp4a_+_30717524.23-P2	GCTGCCTAGGGGGTGTAAGT	1	Atp4a_+_30717613.23-P2	GAGGCGTGATCAAGTGTGAC	2	Atp4a_+_30717524.23-P2|Atp4a_+_30717613.23-P2
Rbbp7	P1P2	Rbbp7_+_162760327.23-P1P2	GCTGGGAGCCAACGGCTCGG	1	Rbbp7_+_162760303.23-P1P2	GTGGACCAATAGCGTGCGAC	2	Rbbp7_+_162760327.23-P1P2|Rbbp7_+_162760303.23-P1P2
Myl6	P1P2	Myl6_-_128494009.23-P1P2	GGGGCGCCCTACCTCGGCTC	1	Myl6_-_128494043.23-P1P2	GGGGCCTGGGTTGGGACTCT	2	Myl6_-_128494009.23-P1P2|Myl6_-_128494043.23-P1P2
Syt16	P1P2	Syt16_-_73997639.23-P1P2	GGGCAGGGCAGGTTCGGTGG	1	Syt16_+_73997690.23-P1P2	GgccgccccgAGCCCCGTGG	2	Syt16_-_73997639.23-P1P2|Syt16_+_73997690.23-P1P2
Cers4	P1P2	Cers4_-_4493291.23-P1P2	GGGGAGGGGCCTGGTGGCGT	1	Cers4_+_4493386.23-P1P2	GTGGTCTGAGCAGGGGAAAA	2	Cers4_-_4493291.23-P1P2|Cers4_+_4493386.23-P1P2
Uqcrb	P1P2	Uqcrb_-_66905480.23-P1P2	GTGAATGGACTCCACACATT	1	Uqcrb_-_66905552.23-P1P2	GGGGAAAGTACTGCGAAATT	2	Uqcrb_-_66905480.23-P1P2|Uqcrb_-_66905552.23-P1P2
Epdr1	P1P2	Epdr1_-_19619886.23-P1P2	GAAAGGGCATCGCACTTAAA	1	Epdr1_-_19619957.23-P1P2	GACTGCAACCCCCCTCAAGG	2	Epdr1_-_19619886.23-P1P2|Epdr1_-_19619957.23-P1P2
Ythdc1	P1P2	Ythdc1_+_86804109.23-P1P2	GgcgAGAAGCGGGACGTAAG	1	Ythdc1_+_86804157.23-P1P2	GACAGTGCGGGGAACCgggg	2	Ythdc1_+_86804109.23-P1P2|Ythdc1_+_86804157.23-P1P2
Gdpd1	P1P2	Gdpd1_-_87074194.23-P1P2	GGCGCTACGGCGCGGAGCGT	1	Gdpd1_-_87074171.23-P1P2	GCAAAGGGGCTCAGATACGC	2	Gdpd1_-_87074194.23-P1P2|Gdpd1_-_87074171.23-P1P2
Adck2	P1P2	Adck2_-_39573732.23-P1P2	GTGAAGAGGAAAGGCAGACG	1	Adck2_-_39573723.23-P1P2	GACGAGGCTGTGAAGAGGAA	2	Adck2_-_39573732.23-P1P2|Adck2_-_39573723.23-P1P2
Cdhr1	P1P2	Cdhr1_+_37098415.23-P1P2	GACTGGGCGTGGTAGGAGAG	1	Cdhr1_-_37098392.23-P1P2	GTGGGACCAGCTTATAGCGG	2	Cdhr1_+_37098415.23-P1P2|Cdhr1_-_37098392.23-P1P2
Scgb2b26	P1P2	Scgb2b26_+_33945425.23-P1P2	GCTGCTCAGGCCTTGACCTC	1	Scgb2b26_-_33945124.23-P1P2	GGACACCTTCCCTTGCATAC	2	Scgb2b26_+_33945425.23-P1P2|Scgb2b26_-_33945124.23-P1P2
Azgp1	P1P2	Azgp1_+_137981382.23-P1P2	GTGGGCAGAGGTTTGATCAC	1	Azgp1_-_137981238.23-P1P2	GCCCCTGCTGACACCAGGGT	2	Azgp1_+_137981382.23-P1P2|Azgp1_-_137981238.23-P1P2
Sptbn2	P1P2	Sptbn2_-_4711014.23-P1P2	GAAAGGGCCTAGCTCTTCTC	1	Sptbn2_+_4711078.23-P1P2	GGCTCAGGGAGGTACCAGAA	2	Sptbn2_-_4711014.23-P1P2|Sptbn2_+_4711078.23-P1P2
Gm20604	ENSMUST00000174651.1	Gm20604_-_102758896.23-ENSMUST00000174651.1	GGGGACTTGGAGTTATGGTG	1	Gm20604_-_102758877.23-ENSMUST00000174651.1	GAGACTGGGGTAGGAGTGAA	2	Gm20604_-_102758896.23-ENSMUST00000174651.1|Gm20604_-_102758877.23-ENSMUST00000174651.1
Slc6a6	P1P2	Slc6a6_-_91684016.23-P1P2	GcgcgcgcgcgccccgTGTG	1	Slc6a6_-_91683915.23-P1P2	GCGCTCGACGAGGCGAGCTC	2	Slc6a6_-_91684016.23-P1P2|Slc6a6_-_91683915.23-P1P2
Npy4r	P1P2	Npy4r_+_34152554.23-P1P2	GTGGGTGCGGCTCCCAAAGT	1	Npy4r_-_34152810.23-P1P2	Gaggcagaagctagagtctc	2	Npy4r_+_34152554.23-P1P2|Npy4r_-_34152810.23-P1P2
Vmn1r73	ENSMUST00000055070.1	Vmn1r73_+_11756108.23-ENSMUST00000055070.1	GCCCACTGAAGAACTTTCAA	1	Vmn1r73_-_11756128.23-ENSMUST00000055070.1	GGCCTTTGAAAGTTCTTCAG	2	Vmn1r73_+_11756108.23-ENSMUST00000055070.1|Vmn1r73_-_11756128.23-ENSMUST00000055070.1
Ercc3	P1P2	Ercc3_-_32240140.23-P1P2	GCCGTCCCGCCCGATCTATA	1	Ercc3_-_32240155.23-P1P2	GTATAGGGCAAATAAGCTCA	2	Ercc3_-_32240140.23-P1P2|Ercc3_-_32240155.23-P1P2
Dpt	P1P2	Dpt_+_164796482.23-P1P2	GTCCCCAGAGAATCACTTCA	1	Dpt_+_164796476.23-P1P2	GGAGAATCACTTCACGGAGA	2	Dpt_+_164796482.23-P1P2|Dpt_+_164796476.23-P1P2
Nmt1	P1P2	Nmt1_-_103028314.23-P1P2	GGCCCCGCGACCACCCTATA	1	Nmt1_+_103028360.23-P1P2	GGAGGAGCGGGCAGCAATTC	2	Nmt1_-_103028314.23-P1P2|Nmt1_+_103028360.23-P1P2
Vps41	P1P2	Vps41_-_18716988.23-P1P2	GGTTAATGGCGGTAACAGGA	1	Vps41_-_18717000.23-P1P2	GAACAGGAGGGATCACAGGG	2	Vps41_-_18716988.23-P1P2|Vps41_-_18717000.23-P1P2
Zfp82	P1P2	Zfp82_-_30090665.23-P1P2	GCCTCAGTGTGGTGGACGAG	1	Zfp82_-_30090615.23-P1P2	GGGGAACGCGGCAGACAAGA	2	Zfp82_-_30090665.23-P1P2|Zfp82_-_30090615.23-P1P2
Spag11a	P1P2	Spag11a_+_19157618.23-P1P2	GCCCTGGTGCTGTGGTAAGA	1	Spag11a_+_19157626.23-P1P2	GGCACCAAGCCCTGGTGCTG	2	Spag11a_+_19157618.23-P1P2|Spag11a_+_19157626.23-P1P2
Mettl10	P1P2	Mettl10_+_132852808.23-P1P2	GTAAGGGGTAAATGTAATGT	1	Mettl10_-_132852861.23-P1P2	GCTCAAAGTGACCAAATCTG	2	Mettl10_+_132852808.23-P1P2|Mettl10_-_132852861.23-P1P2
Obp2b	P1P2	Obp2b_-_25736726.23-P1P2	GACGCAGGGCAGGAGTGTGA	1	Obp2b_-_25736975.23-P1P2	GGCACACGTCCCTGTCCATG	2	Obp2b_-_25736726.23-P1P2|Obp2b_-_25736975.23-P1P2
Bhlha15	P1P2	Bhlha15_+_144190144.23-P1P2	GAGAGCAGGCGACCTCTCTG	1	Bhlha15_-_144190205.23-P1P2	GAGGGAAGGCGGGTCCGCAC	2	Bhlha15_+_144190144.23-P1P2|Bhlha15_-_144190205.23-P1P2
Anapc15	P1P2	Anapc15_-_101896240.23-P1P2	GTGCCGCTGGAGATTCAAGG	1	Anapc15_-_101896269.23-P1P2	GAGGTAGGCGGGGCAAGCGA	2	Anapc15_-_101896240.23-P1P2|Anapc15_-_101896269.23-P1P2
Tm2d1	P1P2	Tm2d1_-_98383384.23-P1P2	GACATCAGCGAGGTTTTCGA	1	Tm2d1_+_98383208.23-P1P2	GGCCGCCTGGCCCGCGGGTC	2	Tm2d1_-_98383384.23-P1P2|Tm2d1_+_98383208.23-P1P2
Trim67	P1P2	Trim67_+_124792922.23-P1P2	GGCGGGTCGGAGGGCTTCGT	1	Trim67_+_124792908.23-P1P2	GTTCGTGGGGAGGATCATTG	2	Trim67_+_124792922.23-P1P2|Trim67_+_124792908.23-P1P2
Olfr959	ENSMUST00000079178.2	Olfr959_+_39573594.23-ENSMUST00000079178.2	GGCAGAAGGAAATGCATAGT	1	Olfr959_-_39573361.23-ENSMUST00000079178.2	GCTTTGAGTGTGATTACTAT	2	Olfr959_+_39573594.23-ENSMUST00000079178.2|Olfr959_-_39573361.23-ENSMUST00000079178.2
Spata22	P1P2	Spata22_+_73329205.23-P1P2	GGGTCAGGCAGGAGACCTGT	1	Spata22_+_73329579.23-P1P2	GAAGGCCTCGCGAGAGTTAA	2	Spata22_+_73329205.23-P1P2|Spata22_+_73329579.23-P1P2
Pla2g2e	P1	Pla2g2e_+_138879241.23-P1	GTCCCCGGGGGGCTCTTCCG	1	Pla2g2e_+_138879253.23-P1	GGGGCCAGCCAGTTCCCCGG	2	Pla2g2e_+_138879241.23-P1|Pla2g2e_+_138879253.23-P1
Cltc	P1P2	Cltc_+_86757596.23-P1P2	GGCGGCGCGGCGTCTGTGGA	1	Cltc_-_86757638.23-P1P2	GCGGTCGGGCGTAGGGATTC	2	Cltc_+_86757596.23-P1P2|Cltc_-_86757638.23-P1P2
Lrrc8e	P1P2	Lrrc8e_+_4226767.23-P1P2	GAGAGATATTCCTGAGACAA	1	Lrrc8e_+_4226898.23-P1P2	GGGCCAGAGAGGGTGAGTCA	2	Lrrc8e_+_4226767.23-P1P2|Lrrc8e_+_4226898.23-P1P2
Cldn8	P1P2	Cldn8_-_88563337.23-P1P2	GTAAACCAACTCAGGATACC	1	Cldn8_+_88563283.23-P1P2	GGCTCCCATCCCCCTCTTAT	2	Cldn8_-_88563337.23-P1P2|Cldn8_+_88563283.23-P1P2
Arsb	P1P2	Arsb_+_93771577.23-P1P2	GAACTCAGCCGGTCCTTCCA	1	Arsb_-_93771352.23-P1P2	GGGGAAGGAAGTGGCTTCAT	2	Arsb_+_93771577.23-P1P2|Arsb_-_93771352.23-P1P2
Krt7	P1	Krt7_-_101412269.23-P1	GGACGAAGAGCCTTGGGCGG	1	Krt7_-_101412215.23-P1	GAGGTGTGGGTGTCTCACGA	2	Krt7_-_101412269.23-P1|Krt7_-_101412215.23-P1
1110012L19Rik	P1P2	1110012L19Rik_+_70385706.23-P1P2	GTTGCAAATAAAGTGGGTCA	1	1110012L19Rik_+_70385791.23-P1P2	GCTACCCGGATAGGAAGGTA	2	1110012L19Rik_+_70385706.23-P1P2|1110012L19Rik_+_70385791.23-P1P2
Nup210	P1P2	Nup210_+_91116964.23-P1P2	GCCACGCGCTACGGGCTCCG	1	Nup210_-_91116888.23-P1P2	GGGGCGAGCGCAGTGATGGG	2	Nup210_+_91116964.23-P1P2|Nup210_-_91116888.23-P1P2
Tnrc18	P1P2	Tnrc18_+_142817762.23-P1P2	GGGGGCTGGCCCGAAGGGGG	1	Tnrc18_-_142817775.23-P1P2	GGGTGCCCGCCCCCCCCTTC	2	Tnrc18_+_142817762.23-P1P2|Tnrc18_-_142817775.23-P1P2
Traf1	P1	Traf1_-_34961650.23-P1	GtgagctgggctggCTTCGG	1	Traf1_-_34961715.23-P1	GAACTGGAGTGCTTCTGTTG	2	Traf1_-_34961650.23-P1|Traf1_-_34961715.23-P1
Lpar5	P1	Lpar5_-_125067816.23-P1	GTGACTCTGTGGGGTTGGTT	1	Lpar5_+_125067691.23-P1	GTCACCTAACTCTGCAACTA	2	Lpar5_-_125067816.23-P1|Lpar5_+_125067691.23-P1
Terf1	P1P2	Terf1_-_15805519.23-P1P2	GTACACTATCCAAAACGCCT	1	Terf1_+_15805585.23-P1P2	GTCAGCCAATCGCATCGCTA	2	Terf1_-_15805519.23-P1P2|Terf1_+_15805585.23-P1P2
Hgs	P1P2	Hgs_+_120467502.23-P1P2	GAATGAGCAGCCTGGACGAG	1	Hgs_-_120467650.23-P1P2	GTGCGCGAGCAGAAAAAGAA	2	Hgs_+_120467502.23-P1P2|Hgs_-_120467650.23-P1P2
Ablim3	P1P2	Ablim3_-_61911756.23-P1P2	GGAATCCCGCGGGTCGTCTG	1	Ablim3_-_61911599.23-P1P2	GAGGCTGCGGAGCCCGAAGG	2	Ablim3_-_61911756.23-P1P2|Ablim3_-_61911599.23-P1P2
Pds5a	P1P2	Pds5a_+_65698276.23-P1P2	GTCGGGCTCGAGGGAGGCGG	1	Pds5a_+_65698363.23-P1P2	Gtcggctgccggccccccgg	2	Pds5a_+_65698276.23-P1P2|Pds5a_+_65698363.23-P1P2
Mtus1	P1	Mtus1_-_41041935.23-P1	GGGTTGTTGTGGTTCCCGAC	1	Mtus1_+_41041986.23-P1	GACAGGACCTGCGACATCAT	2	Mtus1_-_41041935.23-P1|Mtus1_+_41041986.23-P1
Smg7	P1P2	Smg7_-_152902769.23-P1P2	GGTGGGGCGCAGGGACGCTC	1	Smg7_+_152902872.23-P1P2	GGGAAAGCACCCAGAGGGAC	2	Smg7_-_152902769.23-P1P2|Smg7_+_152902872.23-P1P2
Slc44a2	P1	Slc44a2_-_21320646.23-P1	GCGGACTGGAAACCAGAAGG	1	Slc44a2_+_21320650.23-P1	GCCCAGGGAGGGGCGTTGGG	2	Slc44a2_-_21320646.23-P1|Slc44a2_+_21320650.23-P1
Ankrd42	P1P2	Ankrd42_+_92637163.23-P1P2	GGACGCGTGCATAAAGGATA	1	Ankrd42_-_92637269.23-P1P2	GGTACCGAGTGGTTTTCGGT	2	Ankrd42_+_92637163.23-P1P2|Ankrd42_-_92637269.23-P1P2
Stxbp4	P1P2	Stxbp4_+_90638301.23-P1P2	GCCTCCGAGCCCATCCCACC	1	Stxbp4_-_90638309.23-P1P2	GCTGGTGCTTAGGCCCGGGT	2	Stxbp4_+_90638301.23-P1P2|Stxbp4_-_90638309.23-P1P2
Nqo2	P1P2	Nqo2_-_33964571.23-P1P2	GAACTACTGGAGCCCAGCGT	1	Nqo2_+_33964485.23-P1P2	GAAAGCCTGTGCTGGGAGAT	2	Nqo2_-_33964571.23-P1P2|Nqo2_+_33964485.23-P1P2
Olfr1344	P1P2	Olfr1344_-_6410064.23-P1P2	GTTGAGGTGTCTGTATTGGA	1	Olfr1344_-_6409934.23-P1P2	GTGAAGGTGGAGTGTACTTG	2	Olfr1344_-_6410064.23-P1P2|Olfr1344_-_6409934.23-P1P2
Nop14	P1P2	Nop14_+_34660255.23-P1P2	GCCAGGAAGTCGAGGAAGTG	1	Nop14_+_34660263.23-P1P2	GGCCCAGCGCCAGGAAGTCG	2	Nop14_+_34660255.23-P1P2|Nop14_+_34660263.23-P1P2
Olfr143	ENSMUST00000093865.2	Olfr143_+_38253296.23-ENSMUST00000093865.2	GGAGGGAACTAAGAATCTTG	1	Olfr143_-_38253212.23-ENSMUST00000093865.2	GGTAAACCATAGTAAACACT	2	Olfr143_+_38253296.23-ENSMUST00000093865.2|Olfr143_-_38253212.23-ENSMUST00000093865.2
Hsp90b1	P1P2	Hsp90b1_-_86705615.23-P1P2	GCCGCCAATCGGAACTGTCC	1	Hsp90b1_-_86705641.23-P1P2	GGTGCCCGATGCCCGAAGCG	2	Hsp90b1_-_86705615.23-P1P2|Hsp90b1_-_86705641.23-P1P2
Mid2	P1P2	Mid2_-_140664752.23-P1P2	GTAAGCGCGCCTCCAGAGGA	1	Mid2_-_140664767.23-P1P2	GAGGAGGGGCACGGGGAGTT	2	Mid2_-_140664752.23-P1P2|Mid2_-_140664767.23-P1P2
Itch	P1P2	Itch_-_155133280.23-P1P2	GAGGTCCTGGCGGGGAAGAA	1	Itch_+_155133467.23-P1P2	GTGCGCAGGCGCGGCCTCCT	2	Itch_-_155133280.23-P1P2|Itch_+_155133467.23-P1P2
Kdelc1	P1P2	Kdelc1_+_44118988.23-P1P2	GaaggGACGAAAGTAGTTGG	1	Kdelc1_-_44118924.23-P1P2	GAGAGTGGAAAACGCGTCCC	2	Kdelc1_+_44118988.23-P1P2|Kdelc1_-_44118924.23-P1P2
Adamts7	P1P2	Adamts7_-_90162906.23-P1P2	Ggggcggggcgagaccggtg	1	Adamts7_-_90162783.23-P1P2	GTGGGCGCGCACCACCGCCA	2	Adamts7_-_90162906.23-P1P2|Adamts7_-_90162783.23-P1P2
Phpt1	P1P2	Phpt1_+_25575017.23-P1P2	GCCCAAAGCTGCAAAGAACT	1	Phpt1_+_25574896.23-P1P2	GGGCCCGCCTCCCTACGCAT	2	Phpt1_+_25575017.23-P1P2|Phpt1_+_25574896.23-P1P2
Lrpap1	P1P2	Lrpap1_+_35105823.23-P1P2	GGAAAAGTGGGCAGTCATAT	1	Lrpap1_+_35105669.23-P1P2	GATGGCGCCTCGAAGAGAGA	2	Lrpap1_+_35105823.23-P1P2|Lrpap1_+_35105669.23-P1P2
Trappc9	P1P2	Trappc9_-_73061188.23-P1P2	Ggaggaagaaggggtggtac	1	Trappc9_-_73061241.23-P1P2	Ggaaggaagtggaggatccg	2	Trappc9_-_73061188.23-P1P2|Trappc9_-_73061241.23-P1P2
Cnn3	P1P2	Cnn3_-_121426379.23-P1P2	Ggggctgggaccccgcggga	1	Cnn3_-_121426351.23-P1P2	GGTCCTAGGTGGCGTGAggg	2	Cnn3_-_121426379.23-P1P2|Cnn3_-_121426351.23-P1P2
Tfap2d	P1P2	Tfap2d_-_19102861.23-P1P2	GGAACCCCCAGTTCCTTATT	1	Tfap2d_+_19102909.23-P1P2	GTGAGAACGGGGAGGACAAT	2	Tfap2d_-_19102861.23-P1P2|Tfap2d_+_19102909.23-P1P2
Ppm1e	P1P2	Ppm1e_-_87359136.23-P1P2	GcACCCCGCTCCGGTCTGGA	1	Ppm1e_-_87359282.23-P1P2	GGTCCCTCCCGTCGAGTCTG	2	Ppm1e_-_87359136.23-P1P2|Ppm1e_-_87359282.23-P1P2
Plcxd2	P1P2	Plcxd2_+_46010558.23-P1P2	GACCCCGCTGGAGTGGAGAG	1	Plcxd2_+_46010512.23-P1P2	GTGGGAGCGCGATGTAGGGG	2	Plcxd2_+_46010558.23-P1P2|Plcxd2_+_46010512.23-P1P2
Klk1b22	P1P2	Klk1b22_+_44112437.23-P1P2	GCCAAGGATAAAATCGGGTG	1	Klk1b22_+_44112509.23-P1P2	GTCCCTGCTGTGGTAAGGGG	2	Klk1b22_+_44112437.23-P1P2|Klk1b22_+_44112509.23-P1P2
5730455P16Rik	P1P2	5730455P16Rik_+_80378071.23-P1P2	GGCGGAACTCAGATGTGCGA	1	5730455P16Rik_+_80378051.23-P1P2	GGGCGGGGAGGAAGTCGAGC	2	5730455P16Rik_+_80378071.23-P1P2|5730455P16Rik_+_80378051.23-P1P2
Trim68	P1P2	Trim68_+_102687368.23-P1P2	GGGCAAGCGAACAGCCAATC	1	Trim68_+_102687396.23-P1P2	GTAGGTAGCTGAATTCAACC	2	Trim68_+_102687368.23-P1P2|Trim68_+_102687396.23-P1P2
Zfp580	P1P2	Zfp580_+_5051470.23-P1P2	GCTGGAGTCTGCAGCTGTAA	1	Zfp580_+_5051452.23-P1P2	GAAGGGAGAGCGCAAGGGGT	2	Zfp580_+_5051470.23-P1P2|Zfp580_+_5051452.23-P1P2
Lrrd1	P1P2	Lrrd1_-_3844969.23-P1P2	GTAGGCTGCAAGATCTCCTA	1	Lrrd1_+_3845047.23-P1P2	GTGGTCGCAAGGGTTGCTTT	2	Lrrd1_-_3844969.23-P1P2|Lrrd1_+_3845047.23-P1P2
Cyp2c69	P1P2	Cyp2c69_+_39887217.23-P1P2	Gggtcaggtgtgtggaggtg	1	Cyp2c69_+_39887153.23-P1P2	Ggggttatcagagggtggat	2	Cyp2c69_+_39887217.23-P1P2|Cyp2c69_+_39887153.23-P1P2
Malt1	P1P2	Malt1_+_65430795.23-P1P2	GGACCCGGGCCGGGAGGCAA	1	Malt1_+_65430779.23-P1P2	GCAAGGGCGGGGCTTGACTT	2	Malt1_+_65430795.23-P1P2|Malt1_+_65430779.23-P1P2
5730559C18Rik	P1	5730559C18Rik_-_136230524.23-P1	GCCTCTGCACTTCCGGGCGG	1	5730559C18Rik_-_136230518.23-P1	GCCTAGGCCTCTGCACTTCC	2	5730559C18Rik_-_136230524.23-P1|5730559C18Rik_-_136230518.23-P1
Fxn	P1P2	Fxn_+_24280751.23-P1P2	GAAGGGATACGTTGCGAGTT	1	Fxn_+_24280659.23-P1P2	GCCAGCCGCGGCGCTCgggg	2	Fxn_+_24280751.23-P1P2|Fxn_+_24280659.23-P1P2
Hdac7	P2	Hdac7_-_97844420.23-P2	GCAGCTTCGGGGCTTCAGGG	1	Hdac7_-_97844417.23-P2	GGTGCAGCTTCGGGGCTTCA	2	Hdac7_-_97844420.23-P2|Hdac7_-_97844417.23-P2
Asf1a	P1P2	Asf1a_+_53596788.23-P1P2	GAACAAAGTGAGTGGAATAG	1	Asf1a_+_53596884.23-P1P2	GCCGCGGCGGCGAGCAAGAT	2	Asf1a_+_53596788.23-P1P2|Asf1a_+_53596884.23-P1P2
Ighmbp2	P1P2	Ighmbp2_-_3283185.23-P1P2	GGGATCAGGTGAGACCAGGG	1	Ighmbp2_-_3283505.23-P1P2	GGGTGTGGACAGTTGTCCTC	2	Ighmbp2_-_3283185.23-P1P2|Ighmbp2_-_3283505.23-P1P2
Olfr1039	ENSMUST00000099910.1	Olfr1039_-_86131884.23-ENSMUST00000099910.1	GCATGTAGGGAATTTTTTAT	1	Olfr1039_+_86131696.23-ENSMUST00000099910.1	GCAATCACTTGCAATGAGTT	2	Olfr1039_-_86131884.23-ENSMUST00000099910.1|Olfr1039_+_86131696.23-ENSMUST00000099910.1
Zfp180	P1P2	Zfp180_+_24081800.23-P1P2	GGAGGCCTCGAACTCGAGTG	1	Zfp180_+_24081818.23-P1P2	GAACTCAGCGCCAAGGGGCG	2	Zfp180_+_24081800.23-P1P2|Zfp180_+_24081818.23-P1P2
Gtsf1l	P1P2	Gtsf1l_+_163088014.23-P1P2	GAACCGACGCTGATGAATAA	1	Gtsf1l_-_163087938.23-P1P2	GGGGTGGGGGAAGTGGCTTG	2	Gtsf1l_+_163088014.23-P1P2|Gtsf1l_-_163087938.23-P1P2
Prep	P1P2	Prep_+_45067126.23-P1P2	GGGCCCAAGCGGCGACAAGA	1	Prep_-_45067164.23-P1P2	GGGGCCCGCCCGCCGGGGAG	2	Prep_+_45067126.23-P1P2|Prep_-_45067164.23-P1P2
Cdc25c	P1P2	Cdc25c_+_34751762.23-P1P2	GTAAATCGCCCGGGGTTCTT	1	Cdc25c_+_34751697.23-P1P2	GGGGAGAGCCAATATGTACC	2	Cdc25c_+_34751762.23-P1P2|Cdc25c_+_34751697.23-P1P2
Olfr1443	ENSMUST00000049724.6	Olfr1443_-_12678045.23-ENSMUST00000049724.6	GAAGACCTACAGGTGCCCCA	1	Olfr1443_+_12678028.23-ENSMUST00000049724.6	GTTCCCCATGGGGCACCTGT	2	Olfr1443_-_12678045.23-ENSMUST00000049724.6|Olfr1443_+_12678028.23-ENSMUST00000049724.6
Klra2	P1P2	Klra2_-_131247470.23-P1P2	GGACTCTGACAGCAAAGGAA	1	Klra2_-_131247465.23-P1P2	GAAGCTGACTCTGACAGCAA	2	Klra2_-_131247470.23-P1P2|Klra2_-_131247465.23-P1P2
Icam2	P1	Icam2_-_106382761.23-P1	GGATAAGCAGGGGTGTAACA	1	Icam2_-_106382749.23-P1	GCAGGAAGCAGCAGATAAGC	2	Icam2_-_106382761.23-P1|Icam2_-_106382749.23-P1
Tspo2	P1P2	Tspo2_+_48451722.23-P1P2	GaaaaggagaagTTCCATGG	1	Tspo2_-_48451679.23-P1P2	GCGTGAGAGCCCGAGATACG	2	Tspo2_+_48451722.23-P1P2|Tspo2_-_48451679.23-P1P2
Kcnq5	P1P2	Kcnq5_-_21962600.23-P1P2	GGTCCCCAGGGAGTTCGAGA	1	Kcnq5_+_21962566.23-P1P2	GCCTGGGGACGCCACAGTCG	2	Kcnq5_-_21962600.23-P1P2|Kcnq5_+_21962566.23-P1P2
Slc28a2	P1P2	Slc28a2_-_122426348.23-P1P2	Gtagaggtggcccttttcag	1	Slc28a2_+_122425971.23-P1P2	Gcagatttcataaccttacc	2	Slc28a2_-_122426348.23-P1P2|Slc28a2_+_122425971.23-P1P2
Mysm1	P1P2	Mysm1_-_94979234.23-P1P2	GGCTTCCCCAAGGACCGCAT	1	Mysm1_-_94979331.23-P1P2	GTTGTGGCATCCATTGTCTC	2	Mysm1_-_94979234.23-P1P2|Mysm1_-_94979331.23-P1P2
Tulp2	P1	Tulp2_-_45513597.23-P1	GACTACAGGCACTGGCCCCT	1	Tulp2_+_45513629.23-P1	GGCTGGCTATATAGCTCTCT	2	Tulp2_-_45513597.23-P1|Tulp2_+_45513629.23-P1
Setd2	P1P2	Setd2_-_110532056.23-P1P2	GCGGCCGAGAGCCAGTTGAA	1	Setd2_+_110532319.23-P1P2	GCCACCGACCCTGGCAGGGG	2	Setd2_-_110532056.23-P1P2|Setd2_+_110532319.23-P1P2
Psd4	P2	Psd4_+_24386460.23-P2	GCCGGCTCCAGCATCTTCCA	1	Psd4_-_24386377.23-P2	GAGGCCCTGGTGTTGTGGGG	2	Psd4_+_24386460.23-P2|Psd4_-_24386377.23-P2
Mettl11b	P1P2	Mettl11b_-_163725230.23-P1P2	GGGGAGGGGTAGCAGACATG	1	Mettl11b_+_163725256.23-P1P2	GCGCGCAAGCAATCAGACGG	2	Mettl11b_-_163725230.23-P1P2|Mettl11b_+_163725256.23-P1P2
Dusp13	P2	Dusp13_-_21743072.23-P2	GTATAGAGGGTAGATTGCTA	1	Dusp13_-_21743092.23-P2	GGGCCTGTGGAGTTTTCACC	2	Dusp13_-_21743072.23-P2|Dusp13_-_21743092.23-P2
Ggps1	P1P2	Ggps1_-_14063725.23-P1P2	GAGGCATCCgggaaagaggt	1	Ggps1_+_14063437.23-P1P2	GAGGCGCGGCCATGAGGCAG	2	Ggps1_-_14063725.23-P1P2|Ggps1_+_14063437.23-P1P2
Hist1h3g	ENSMUST00000080859.5	Hist1h3g_-_23535354.23-ENSMUST00000080859.5	GGGAAGGAGGGGTACGAGCG	1	Hist1h3g_+_23535270.23-ENSMUST00000080859.5	GTCCCGCGCAGTAGTACTAT	2	Hist1h3g_-_23535354.23-ENSMUST00000080859.5|Hist1h3g_+_23535270.23-ENSMUST00000080859.5
Prkch	P1P2	Prkch_-_73584620.23-P1P2	GCACGCCCCCGGGGTCCGGA	1	Prkch_-_73584638.23-P1P2	GAAGGCGTGGCAGCCCGCAC	2	Prkch_-_73584620.23-P1P2|Prkch_-_73584638.23-P1P2
Slc12a6	P1P2	Slc12a6_-_112265502.23-P1P2	GCACACGCGTTCAGACCCTA	1	Slc12a6_+_112265495.23-P1P2	GGGAACTGTAGTCCGCCCTA	2	Slc12a6_-_112265502.23-P1P2|Slc12a6_+_112265495.23-P1P2
Nmnat1	P1P2	Nmnat1_-_149485338.23-P1P2	GCGGCAGGCGGGGATCGGGA	1	Nmnat1_+_149485297.23-P1P2	GCGCCCGCTAGCGGATCCCA	2	Nmnat1_-_149485338.23-P1P2|Nmnat1_+_149485297.23-P1P2
Olfr1134	ENSMUST00000099854.1	Olfr1134_-_87657080.23-ENSMUST00000099854.1	GTGACTCAATGTCAATTAGT	1	Olfr1134_+_87657394.23-ENSMUST00000099854.1	GACACTGAGAAATACTCCAT	2	Olfr1134_-_87657080.23-ENSMUST00000099854.1|Olfr1134_+_87657394.23-ENSMUST00000099854.1
Ppp2r5d	P1P2	Ppp2r5d_+_46705100.23-P1P2	GTCTGGGAGCCGAACCCTGG	1	Ppp2r5d_-_46705113.23-P1P2	GAGTACAAACCGCCAGGGTT	2	Ppp2r5d_+_46705100.23-P1P2|Ppp2r5d_-_46705113.23-P1P2
Trmt6	P1P2	Trmt6_+_132816137.23-P1P2	GTAAGGAAGCCACGCGACTA	1	Trmt6_+_132816244.23-P1P2	GCGCCAGAACGCCAGACGCA	2	Trmt6_+_132816137.23-P1P2|Trmt6_+_132816244.23-P1P2
Sh3bp4	P1P2	Sh3bp4_+_89070275.23-P1P2	Ggaagaggcgggtcaagctc	1	Sh3bp4_+_89070263.23-P1P2	Gcaagctcaggctggggcgt	2	Sh3bp4_+_89070275.23-P1P2|Sh3bp4_+_89070263.23-P1P2
Rab3il1	P2	Rab3il1_-_10017906.23-P2	GGGGCTAGAAGTCTGAATGA	1	Rab3il1_-_10018053.23-P2	GGAAAGGCGGAGGCCAGCTC	2	Rab3il1_-_10017906.23-P2|Rab3il1_-_10018053.23-P2
Mrps5	P1P2	Mrps5_-_127587234.23-P1P2	GACCCCTGAGCAGCTGTCCG	1	Mrps5_+_127587299.23-P1P2	GGAGGTGTGCTGAGGCTCGA	2	Mrps5_-_127587234.23-P1P2|Mrps5_+_127587299.23-P1P2
Gfra2	P1P2	Gfra2_+_70889946.23-P1P2	GCAGCGCCCCGGCTCCCTGG	1	Gfra2_-_70889987.23-P1P2	GTGAGCCCCGAGCAGAGGAG	2	Gfra2_+_70889946.23-P1P2|Gfra2_-_70889987.23-P1P2
Slc22a26	P1P2	Slc22a26_+_7802814.23-P1P2	GCCATTAAACAGTTTCACTC	1	Slc22a26_-_7802856.23-P1P2	GGCATGCAGTCTTTTGTCGA	2	Slc22a26_+_7802814.23-P1P2|Slc22a26_-_7802856.23-P1P2
1810043G02Rik	P1P2	1810043G02Rik_-_77978504.23-P1P2	GCGGCGGGCCGCCAAAGGGG	1	1810043G02Rik_-_77978500.23-P1P2	GGGACCGGCGGGCCGCCAAA	2	1810043G02Rik_-_77978504.23-P1P2|1810043G02Rik_-_77978500.23-P1P2
Fpr1	P1P2	Fpr1_-_17884016.23-P1P2	GCAGAAATGCATTGGGTAAC	1	Fpr1_+_17884111.23-P1P2	GTTTCCAGAACAATCCAACC	2	Fpr1_-_17884016.23-P1P2|Fpr1_+_17884111.23-P1P2
Mrpl15	P1P2	Mrpl15_-_4785814.23-P1P2	GAGAGCGACCGCATCCGCGT	1	Mrpl15_-_4785818.23-P1P2	GCGACCGCATCCGCGTCGGT	2	Mrpl15_-_4785814.23-P1P2|Mrpl15_-_4785818.23-P1P2
Mrps24	P1P2	Mrps24_-_5707772.23-P1P2	GCGGGGCGTGGCGAGGGAGA	1	Mrps24_+_5707658.23-P1P2	GGGGTCGCGCCGGCCCAAGA	2	Mrps24_-_5707772.23-P1P2|Mrps24_+_5707658.23-P1P2
Slc30a6	P1P2	Slc30a6_+_74395457.23-P1P2	GGGGCTGCTCGCCCAGGGAA	1	Slc30a6_+_74395452.23-P1P2	GGCTCGCCCAGGGAAAGGGT	2	Slc30a6_+_74395457.23-P1P2|Slc30a6_+_74395452.23-P1P2
Ddhd2	P1P2	Ddhd2_-_25754627.23-P1P2	GAACCCCGGTGGGCAGGACT	1	Ddhd2_+_25754589.23-P1P2	GGGGTTGCCGGGACCCATGA	2	Ddhd2_-_25754627.23-P1P2|Ddhd2_+_25754589.23-P1P2
Upf2	P1P2	Upf2_+_5951389.23-P1P2	GcgcccgccACTCACCAACG	1	Upf2_+_5950969.23-P1P2	GACGGGGCGGAACTCTAAGG	2	Upf2_+_5951389.23-P1P2|Upf2_+_5950969.23-P1P2
Alg13	P1P2	Alg13_+_144317891.23-P1P2	GGGAATGCGTCCGGGAGAGG	1	Alg13_+_144317933.23-P1P2	GGGGAGGAGGCGGAAGTCCA	2	Alg13_+_144317891.23-P1P2|Alg13_+_144317933.23-P1P2
Ccdc12	P1P2	Ccdc12_-_110656246.23-P1P2	GCCAAGAGGGCAGTTAGGAG	1	Ccdc12_+_110656366.23-P1P2	GAGTGAGCCGGCTGGGTTGT	2	Ccdc12_-_110656246.23-P1P2|Ccdc12_+_110656366.23-P1P2
Ccdc59	P1P2	Ccdc59_+_105841300.23-P1P2	GAGGATGAGCGTCATGGCGG	1	Ccdc59_-_105841288.23-P1P2	GTGGGCAGGTCCGGGGTCCT	2	Ccdc59_+_105841300.23-P1P2|Ccdc59_-_105841288.23-P1P2
Ccr7	P1P2	Ccr7_-_99155314.23-P1P2	GACGCCTGGGTGGCTGCTGT	1	Ccr7_+_99155230.23-P1P2	GTACAAGGCACTACTACCAG	2	Ccr7_-_99155314.23-P1P2|Ccr7_+_99155230.23-P1P2
Rnf130	P1P2	Rnf130_+_50025182.23-P1P2	GCGCGCCCGTGGATCTCTCA	1	Rnf130_-_50025232.23-P1P2	GGCGCGGGCCGCGGACGTGA	2	Rnf130_+_50025182.23-P1P2|Rnf130_-_50025232.23-P1P2
Krtap27-1	P1P2	Krtap27-1_+_88671971.23-P1P2	GTGAGCTTGGGTGACACATG	1	Krtap27-1_-_88672001.23-P1P2	GTCACCCAAGCTCACTATTA	2	Krtap27-1_+_88671971.23-P1P2|Krtap27-1_-_88672001.23-P1P2
Ddx54	P1P2	Ddx54_+_120612963.23-P1P2	GCAGGGGCGGAGCGTCAACA	1	Ddx54_+_120612852.23-P1P2	GGGGACATACCAACTGGTGG	2	Ddx54_+_120612963.23-P1P2|Ddx54_+_120612852.23-P1P2
Serpine1	P1P2	Serpine1_-_137072463.23-P1P2	GTACGTGTGAAAGGGCATGG	1	Serpine1_-_137072455.23-P1P2	GCGTGTGTGTACGTGTGAAA	2	Serpine1_-_137072463.23-P1P2|Serpine1_-_137072455.23-P1P2
Brs3	P1P2	Brs3_-_57043112.23-P1P2	GAGGAGTAGCCGGATGTCTT	1	Brs3_-_57042951.23-P1P2	GAAAGGGGAAAGCAGGTACA	2	Brs3_-_57043112.23-P1P2|Brs3_-_57042951.23-P1P2
Chrm3	ENSMUST00000063093.9	Chrm3_+_9879160.23-ENSMUST00000063093.9	GGGGATGAGTAGACAAGAGT	1	Chrm3_+_9879209.23-ENSMUST00000063093.9	GaaCGAAAATGTAGACAGGC	2	Chrm3_+_9879160.23-ENSMUST00000063093.9|Chrm3_+_9879209.23-ENSMUST00000063093.9
Tas2r105	ENSMUST00000053652.4	Tas2r105_+_131687633.23-ENSMUST00000053652.4	GTTAAGTCTTACAGGGAAAG	1	Tas2r105_+_131687641.23-ENSMUST00000053652.4	GTAGATAAGTTAAGTCTTAC	2	Tas2r105_+_131687633.23-ENSMUST00000053652.4|Tas2r105_+_131687641.23-ENSMUST00000053652.4
Sfn	P1P2	Sfn_-_133601986.23-P1P2	GAAAAGGGCTGGGACGGGAG	1	Sfn_+_133601876.23-P1P2	GACCACGCCCAACTCTTCTC	2	Sfn_-_133601986.23-P1P2|Sfn_+_133601876.23-P1P2
Atoh7	P1P2	Atoh7_+_63099767.23-P1P2	GATGTCGGACAGAGCGATGA	1	Atoh7_+_63099661.23-P1P2	GCCTACCCTGGGAACGGCAG	2	Atoh7_+_63099767.23-P1P2|Atoh7_+_63099661.23-P1P2
Hist1h2bn	P1P2	Hist1h2bn_-_21753862.23-P1P2	GTATAAGCCTGCTCAGTAAG	1	Hist1h2bn_-_21753870.23-P1P2	GTGCTCAGTAAGTGGTTTGA	2	Hist1h2bn_-_21753862.23-P1P2|Hist1h2bn_-_21753870.23-P1P2
Mblac1	P1P2	Mblac1_+_138194166.23-P1P2	GCCCCCCTTAGGCTTATAGT	1	Mblac1_-_138193774.23-P1P2	GCACCCCAAGGATactggtt	2	Mblac1_+_138194166.23-P1P2|Mblac1_-_138193774.23-P1P2
Brsk2	P1P2	Brsk2_+_141949547.23-P1P2	GGGGCCAGGAAAAGCGAGAT	1	Brsk2_-_141949720.23-P1P2	Gggctcggaggcactcgaag	2	Brsk2_+_141949547.23-P1P2|Brsk2_-_141949720.23-P1P2
Impa1	P1P2	Impa1_+_10331424.23-P1P2	GTGAAGGCGGGGTTTTAATG	1	Impa1_-_10331368.23-P1P2	GCTCAACCGCCGGCGTCCGA	2	Impa1_+_10331424.23-P1P2|Impa1_-_10331368.23-P1P2
Olfr1053	ENSMUST00000099897.3	Olfr1053_-_86315562.23-ENSMUST00000099897.3	GGACTGCAACTTCATCTTGT	1	Olfr1053_-_86315423.23-ENSMUST00000099897.3	GTGTATTGAGTATTCTTCTT	2	Olfr1053_-_86315562.23-ENSMUST00000099897.3|Olfr1053_-_86315423.23-ENSMUST00000099897.3
Dlx1	P1P2	Dlx1_+_71529652.23-P1P2	GGCCCGGCCTGGGGAGAATC	1	Dlx1_+_71529682.23-P1P2	GGGGCTCGGCTGGACTAGAG	2	Dlx1_+_71529652.23-P1P2|Dlx1_+_71529682.23-P1P2
Cmc1	P1P2	Cmc1_-_118150256.23-P1P2	GCCCTCTCCCGGAATCCTGA	1	Cmc1_+_118150184.23-P1P2	GAAGTAGGAACAAGGGACGT	2	Cmc1_-_118150256.23-P1P2|Cmc1_+_118150184.23-P1P2
Lhx5	P1P2	Lhx5_+_120431749.23-P1P2	GGGCTACAGCGTTGCGGTCA	1	Lhx5_-_120431674.23-P1P2	GCCTCCAGACCCAAACTAGA	2	Lhx5_+_120431749.23-P1P2|Lhx5_-_120431674.23-P1P2
Tmem236	P1P2	Tmem236_-_14174367.23-P1P2	GAGTTCATCTGACTTCTAGT	1	Tmem236_+_14174315.23-P1P2	GGGAACACTGGTTAAAAAGG	2	Tmem236_-_14174367.23-P1P2|Tmem236_+_14174315.23-P1P2
Rnf167	P1P2	Rnf167_+_70647093.23-P1P2	GCCGGAGGGGCGGGAATTTA	1	Rnf167_+_70647184.23-P1P2	GAGGCCTCATAGCCCGAACT	2	Rnf167_+_70647093.23-P1P2|Rnf167_+_70647184.23-P1P2
Actn1	P1P2	Actn1_-_80260554.23-P1P2	GGGACTGGGCGGCCCCCTCC	1	Actn1_+_80260504.23-P1P2	GTGCACAGAGACCCGCCTGA	2	Actn1_-_80260554.23-P1P2|Actn1_+_80260504.23-P1P2
Tmem125	P1	Tmem125_-_118544129.23-P1	GTGGCCCTGCGACTTCAGTG	1	Tmem125_+_118544287.23-P1	GTGGCTGTAGATCTTCGGGG	2	Tmem125_-_118544129.23-P1|Tmem125_+_118544287.23-P1
Cspp1	P1P2	Cspp1_-_10039593.23-P1P2	GCGTGACTGGAGACCGTCCT	1	Cspp1_+_10039640.23-P1P2	GGCACCCGCTGCTGCGCCCA	2	Cspp1_-_10039593.23-P1P2|Cspp1_+_10039640.23-P1P2
4930432K21Rik	P1P2	4930432K21Rik_+_84148102.23-P1P2	GCTAACAGAACGATGTGCGG	1	4930432K21Rik_-_84147996.23-P1P2	GAGAAGGCGGAGCATGCGTA	2	4930432K21Rik_+_84148102.23-P1P2|4930432K21Rik_-_84147996.23-P1P2
Kcnip2	P2	Kcnip2_-_45812392.23-P2	GAGAGGGCAAGACTGACAGG	1	Kcnip2_-_45812389.23-P2	GGCGAGAGGGCAAGACTGAC	2	Kcnip2_-_45812392.23-P2|Kcnip2_-_45812389.23-P2
Sparc	P1P2	Sparc_+_55420026.23-P1P2	GCCTACCACAAGGCAAGGAA	1	Sparc_-_55420126.23-P1P2	GCTAAACAGACATGAGGGTC	2	Sparc_+_55420026.23-P1P2|Sparc_-_55420126.23-P1P2
Ccl22	P1P2	Ccl22_+_94745529.23-P1P2	GAAGGCGGGGAACTACTCAG	1	Ccl22_-_94745514.23-P1P2	GCCTCCGGAGACCCACAGTT	2	Ccl22_+_94745529.23-P1P2|Ccl22_-_94745514.23-P1P2
Plch2	P2	Plch2_+_155043323.23-P2	GGCTGGCCCCGCTGTCCTCT	1	Plch2_-_155043320.23-P2	GAGCGCAACGCGCAGAGACT	2	Plch2_+_155043323.23-P2|Plch2_-_155043320.23-P2
Aldoc	P1P2	Aldoc_+_78322911.23-P1P2	GCTGCCAACAGGGCCCTAGA	1	Aldoc_-_78322953.23-P1P2	GGGGTTCCATGATGTGGGAA	2	Aldoc_+_78322911.23-P1P2|Aldoc_-_78322953.23-P1P2
Espn	P2	Espn_+_152152475.23-P2	GGGCCGCCGGGGATAGGGGA	1	Espn_-_152152494.23-P2	GAGCCCTCCCCTATCCCCGG	2	Espn_+_152152475.23-P2|Espn_-_152152494.23-P2
Cpsf4	P1P2	Cpsf4_-_145167129.23-P1P2	GGAAACAGGCGATCGGTCGG	1	Cpsf4_+_145167014.23-P1P2	GAGGGCAGGAACGCTGTCTC	2	Cpsf4_-_145167129.23-P1P2|Cpsf4_+_145167014.23-P1P2
Arhgef15	P1P2	Arhgef15_-_68957097.23-P1P2	GGTACTGCTGCGTGGCGGGA	1	Arhgef15_-_68957154.23-P1P2	GAGGGTGTTCAAATGAGGGT	2	Arhgef15_-_68957097.23-P1P2|Arhgef15_-_68957154.23-P1P2
Syt4	P1P2	Syt4_+_31447466.23-P1P2	GTGCCAGAAGGAGGGCGAGG	1	Syt4_-_31447422.23-P1P2	GGACGCAATCCTGACGCTAC	2	Syt4_+_31447466.23-P1P2|Syt4_-_31447422.23-P1P2
Mrps14	P1P2	Mrps14_-_160195089.23-P1P2	GCCTAAGTGGGCGGTCCGCA	1	Mrps14_+_160195143.23-P1P2	GTAGCCTATAGAGAGGGAGA	2	Mrps14_-_160195089.23-P1P2|Mrps14_+_160195143.23-P1P2
Rft1	P1P2	Rft1_+_30654300.23-P1P2	GGGGTCTTTGACAGCAGGGG	1	Rft1_+_30654264.23-P1P2	GCGACTCCAAACAACTTTTG	2	Rft1_+_30654300.23-P1P2|Rft1_+_30654264.23-P1P2
Pkn3	P1P2	Pkn3_-_30077655.23-P1P2	GGGGCGCGCGAGTCTCCGGA	1	Pkn3_-_30077610.23-P1P2	GTGCTCCCGCGTGGCCGGGA	2	Pkn3_-_30077655.23-P1P2|Pkn3_-_30077610.23-P1P2
Olfr1480	ENSMUST00000072219.1	Olfr1480_-_13529560.23-ENSMUST00000072219.1	GAGACCATTTCACTGTAGAA	1	Olfr1480_-_13529456.23-ENSMUST00000072219.1	GTTATAATAGGGATACACAT	2	Olfr1480_-_13529560.23-ENSMUST00000072219.1|Olfr1480_-_13529456.23-ENSMUST00000072219.1
Adprhl2	P1P2	Adprhl2_+_126321819.23-P1P2	GAAGCGTGCGAGTACTTATG	1	Adprhl2_+_126321772.23-P1P2	GGCGCTGTGGGGTAGGACGT	2	Adprhl2_+_126321819.23-P1P2|Adprhl2_+_126321772.23-P1P2
Cd200r4	P1P2	Cd200r4_+_44811659.23-P1P2	GATGCTGTCCAGCCCTCAAA	1	Cd200r4_-_44811668.23-P1P2	GCATGTGGTCACACCCTTTG	2	Cd200r4_+_44811659.23-P1P2|Cd200r4_-_44811668.23-P1P2
Prps1l1	P1P2	Prps1l1_+_34984398.23-P1P2	GGGGTTCTAAACAacagaag	1	Prps1l1_-_34984523.23-P1P2	Gtgcaaggccagcctaatca	2	Prps1l1_+_34984398.23-P1P2|Prps1l1_-_34984523.23-P1P2
Olfr907	ENSMUST00000052901.1	Olfr907_+_38498379.23-ENSMUST00000052901.1	GTAAGGGAGAAGGGTAAAGC	1	Olfr907_-_38498493.23-ENSMUST00000052901.1	GAATGCATTTCATGTTTAAA	2	Olfr907_+_38498379.23-ENSMUST00000052901.1|Olfr907_-_38498493.23-ENSMUST00000052901.1
Vcp	P1P2	Vcp_+_43000626.23-P1P2	GTCGAGGAAGCGTAGTGCTG	1	Vcp_-_43000656.23-P1P2	GTACGCTTCCTCGACGGATA	2	Vcp_+_43000626.23-P1P2|Vcp_-_43000656.23-P1P2
Prr9	P1P2	Prr9_+_92124108.23-P1P2	GAACCCAGAGGCCAAAATGT	1	Prr9_+_92124120.23-P1P2	GAGGTCTGGTGAGAACCCAG	2	Prr9_+_92124108.23-P1P2|Prr9_+_92124120.23-P1P2
Rnd2	P1P2	Rnd2_+_101468109.23-P1P2	GCACCCGCACAGCCGAGGGG	1	Rnd2_+_101468020.23-P1P2	GTGACCCCAGGAGCGCCTGA	2	Rnd2_+_101468109.23-P1P2|Rnd2_+_101468020.23-P1P2
Gale	P1P2	Gale_+_135963565.23-P1P2	GAGGGCGGAAATGAGGGGTG	1	Gale_+_135963570.23-P1P2	GCATCGAGGGCGGAAATGAG	2	Gale_+_135963565.23-P1P2|Gale_+_135963570.23-P1P2
Il12a	P1P2	Il12a_-_68691274.23-P1P2	GGACAAGAGTGGCTACTCGC	1	Il12a_-_68691223.23-P1P2	GGGGCAGCGTGTTAGGGCTA	2	Il12a_-_68691274.23-P1P2|Il12a_-_68691223.23-P1P2
Mybpc1	P1P2	Mybpc1_+_88605157.23-P1P2	GCTTCCAGCAGGCGGGAGAG	1	Mybpc1_+_88605190.23-P1P2	GTCGCATCTGCCACACGAGA	2	Mybpc1_+_88605157.23-P1P2|Mybpc1_+_88605190.23-P1P2
Nr0b2	P1P2	Nr0b2_+_133553215.23-P1P2	GGACCCTGGCAGGACTGATG	1	Nr0b2_+_133553225.23-P1P2	GCATACACGCTGACCCTGGC	2	Nr0b2_+_133553215.23-P1P2|Nr0b2_+_133553225.23-P1P2
Ybey	P1P2	Ybey_-_76468981.23-P1P2	GGAGGCTGCACGCAGACTGT	1	Ybey_-_76468997.23-P1P2	GTGTGGGCGAGCACAAGCGC	2	Ybey_-_76468981.23-P1P2|Ybey_-_76468997.23-P1P2
Olfr780	ENSMUST00000063168.2	Olfr780_-_129321341.23-ENSMUST00000063168.2	GAAGTAGAGAACAAATGAGG	1	Olfr780_-_129321260.23-ENSMUST00000063168.2	GGTCACCAGAAGATATGCAA	2	Olfr780_-_129321341.23-ENSMUST00000063168.2|Olfr780_-_129321260.23-ENSMUST00000063168.2
Lace1	P1P2	Lace1_+_42478550.23-P1P2	GGCCCACCGGAAGGCGTGAA	1	Lace1_-_42478613.23-P1P2	GGAGGCCTCGCGCCTTGAGG	2	Lace1_+_42478550.23-P1P2|Lace1_-_42478613.23-P1P2
Tmem214	P1P2	Tmem214_+_30869519.23-P1P2	GAGCGCCTGGGGAGTGATGG	1	Tmem214_-_30869482.23-P1P2	GGAGCCCGCCCGCAGGTGCA	2	Tmem214_+_30869519.23-P1P2|Tmem214_-_30869482.23-P1P2
Wscd2	P1P2	Wscd2_+_113490318.23-P1P2	GTCCACTGAGGGTCCCTGAA	1	Wscd2_+_113490239.23-P1P2	GTGGCTCCGGTTAGGTCCAA	2	Wscd2_+_113490318.23-P1P2|Wscd2_+_113490239.23-P1P2
Bhlhe22	P1P2	Bhlhe22_-_18054125.23-P1P2	GCAAGCTAAAGGCAGTTGTT	1	Bhlhe22_-_18054049.23-P1P2	GAAGGAGCAAAGAACATCCT	2	Bhlhe22_-_18054125.23-P1P2|Bhlhe22_-_18054049.23-P1P2
Slc36a3	P1P2	Slc36a3_-_55151800.23-P1P2	GTCTAGCTGGAGGTAAACAA	1	Slc36a3_+_55151823.23-P1P2	GCCTGCGCAGAGGATCTGAG	2	Slc36a3_-_55151800.23-P1P2|Slc36a3_+_55151823.23-P1P2
Nipal4	P1P2	Nipal4_+_46166534.23-P1P2	GGCACGGGCGGATGACTCGG	1	Nipal4_-_46166488.23-P1P2	GCGATGGGGAATCAACTCTG	2	Nipal4_+_46166534.23-P1P2|Nipal4_-_46166488.23-P1P2
Mafg	P1P2	Mafg_+_120633664.23-P1P2	GGGGCTGCGCAGGCGTGATG	1	Mafg_-_120633735.23-P1P2	GGCGCCCTGGCAATGTCTCG	2	Mafg_+_120633664.23-P1P2|Mafg_-_120633735.23-P1P2
Gemin2	P1P2	Gemin2_+_59013379.23-P1P2	GCCACCGGCTACAGGCGCAA	1	Gemin2_+_59013323.23-P1P2	GAAGCTTATGGCACCGGTGG	2	Gemin2_+_59013379.23-P1P2|Gemin2_+_59013323.23-P1P2
Ldlr	P1P2	Ldlr_-_21723452.23-P1P2	GGGAAGCGGTGAAATTCTGT	1	Ldlr_-_21723378.23-P1P2	GGGCGACCCAGGGTGTGGAA	2	Ldlr_-_21723452.23-P1P2|Ldlr_-_21723378.23-P1P2
Fam222a	P1P2	Fam222a_-_114568211.23-P1P2	GGACGCGACGGGTACTGAGA	1	Fam222a_+_114568141.23-P1P2	GTCAGGCGGCGCATCCTCGC	2	Fam222a_-_114568211.23-P1P2|Fam222a_+_114568141.23-P1P2
Ift46	P1P2	Ift46_+_44772906.23-P1P2	GACGCGGCGCTGGGATAGAG	1	Ift46_+_44772900.23-P1P2	GCGCTGGGATAGAGCGGCCC	2	Ift46_+_44772906.23-P1P2|Ift46_+_44772900.23-P1P2
B9d1	P1P2	B9d1_+_61504756.23-P1P2	GTCACCCAGCACATTGTCTC	1	B9d1_+_61504998.23-P1P2	GGGAACCTAACCCCCAGGGG	2	B9d1_+_61504756.23-P1P2|B9d1_+_61504998.23-P1P2
Paip2b	P1P2	Paip2b_+_83831927.23-P1P2	GAGCTGGGAGTCTCCATCGA	1	Paip2b_-_83831956.23-P1P2	GGGAGACTCCCAGCTCTGAT	2	Paip2b_+_83831927.23-P1P2|Paip2b_-_83831956.23-P1P2
Cldn10	P1P2	Cldn10_+_118854796.23-P1P2	GAGGTCTTGGGGTACCTCCT	1	Cldn10_-_118854751.23-P1P2	GAGGGGAGAGCGCTGGTCTG	2	Cldn10_+_118854796.23-P1P2|Cldn10_-_118854751.23-P1P2
Gtsf1	P1P2	Gtsf1_-_103430617.23-P1P2	GGGCCTAAAGGGTCCTACAT	1	Gtsf1_-_103430547.23-P1P2	GCTGCCCAAGGCGGCTTCTT	2	Gtsf1_-_103430617.23-P1P2|Gtsf1_-_103430547.23-P1P2
Zc3h12c	P1P2	Zc3h12c_+_52168997.23-P1P2	GGGCCGGGAGGGGAATGCAC	1	Zc3h12c_-_52168946.23-P1P2	GAACCCGGGAGGCTTGGGGA	2	Zc3h12c_+_52168997.23-P1P2|Zc3h12c_-_52168946.23-P1P2
BC043934	ENSMUST00000070500.2	BC043934_+_96437757.23-ENSMUST00000070500.2	GGGGCATTGCTCTAGATCAA	1	BC043934_-_96437614.23-ENSMUST00000070500.2	GTGTGGCCCTGCACAGCAGC	2	BC043934_+_96437757.23-ENSMUST00000070500.2|BC043934_-_96437614.23-ENSMUST00000070500.2
Arhgef4	P2	Arhgef4_+_34750440.23-P2	GAGGGACGCTCGCTCCTCAA	1	Arhgef4_+_34750475.23-P2	GAATGCGCCCTGCTGTGGAG	2	Arhgef4_+_34750440.23-P2|Arhgef4_+_34750475.23-P2
Anxa7	P1P2	Anxa7_-_20480140.23-P1P2	GGTGGAGCCGCGCAAGTGGG	1	Anxa7_-_20480032.23-P1P2	GGGACGCTGCGCCCCTCAGG	2	Anxa7_-_20480140.23-P1P2|Anxa7_-_20480032.23-P1P2
Gnat3	P1P2	Gnat3_-_17962401.23-P1P2	GTGTTTTGTGCTAAACTCTC	1	Gnat3_-_17962423.23-P1P2	GCAGGTAAGCATGATTTTGA	2	Gnat3_-_17962401.23-P1P2|Gnat3_-_17962423.23-P1P2
Chrna9	ENSMUST00000031108.6	Chrna9_+_65967006.23-ENSMUST00000031108.6	GGGGGATAGAGGTGCTGGAT	1	Chrna9_+_65967011.23-ENSMUST00000031108.6	GCAGGTGGGGATAGAGGTGC	2	Chrna9_+_65967006.23-ENSMUST00000031108.6|Chrna9_+_65967011.23-ENSMUST00000031108.6
Tmem182	P1P2	Tmem182_+_40805443.23-P1P2	GAACCAGGCAGGAGCGGGCT	1	Tmem182_+_40805380.23-P1P2	GGGAACTGCAAGAAAATAGT	2	Tmem182_+_40805443.23-P1P2|Tmem182_+_40805380.23-P1P2
Lphn2	ENSMUST00000106128.2	Lphn2_+_148954772.23-ENSMUST00000106128.2	GTTGCTGTGACGACATACAA	1	Lphn2_+_148955020.23-ENSMUST00000106128.2	GGACGGATGTATTCTCTCAA	2	Lphn2_+_148954772.23-ENSMUST00000106128.2|Lphn2_+_148955020.23-ENSMUST00000106128.2
Sfi1	P1P2	Sfi1_+_3193568.23-P1P2	GCAGAAGCGCAGAAACTTCA	1	Sfi1_-_3193523.23-P1P2	GTTAGTGCGCTCTGTCTTCC	2	Sfi1_+_3193568.23-P1P2|Sfi1_-_3193523.23-P1P2
Sgta	P1P2	Sgta_-_81060421.23-P1P2	GCTAAAGCACGGTGGGGCGG	1	Sgta_-_81060434.23-P1P2	GGGGCGGCGGCGGACCCCTG	2	Sgta_-_81060421.23-P1P2|Sgta_-_81060434.23-P1P2
Tex261	P1P2	Tex261_-_83775885.23-P1P2	GCGAGCGCCGCTAACCGGCT	1	Tex261_+_83776083.23-P1P2	GCAGCCTAGAGGGAGAGTTA	2	Tex261_-_83775885.23-P1P2|Tex261_+_83776083.23-P1P2
Cd47	P1P2	Cd47_-_49855557.23-P1P2	GCTCCGCCGGAGCCTGCCCA	1	Cd47_-_49855479.23-P1P2	GGAGCTGGCTGGAGGGACGG	2	Cd47_-_49855557.23-P1P2|Cd47_-_49855479.23-P1P2
Eif4e3	P1P2	Eif4e3_-_99666916.23-P1P2	GCCGGGAGCAGAGGACCCGA	1	Eif4e3_-_99666923.23-P1P2	GCAGAGGACCCGAGGGAGAA	2	Eif4e3_-_99666916.23-P1P2|Eif4e3_-_99666923.23-P1P2
Ap1g2	P1P2	Ap1g2_+_55106759.23-P1P2	GTCTCTGAGTGCCACCTGGT	1	Ap1g2_-_55106640.23-P1P2	GACGGGACCCCGCCCCTCTA	2	Ap1g2_+_55106759.23-P1P2|Ap1g2_-_55106640.23-P1P2
Jagn1	P1P2	Jagn1_-_113442441.23-P1P2	GGGGTTCGGTTCTGCACGAT	1	Jagn1_-_113442474.23-P1P2	GGGTCAGTGAACCATTTCTA	2	Jagn1_-_113442441.23-P1P2|Jagn1_-_113442474.23-P1P2
Pde4a	P1	Pde4a_-_21196662.23-P1	GGAGTCCTGCTGAAGCTCAT	1	Pde4a_+_21196633.23-P1	GCTTCAGCAGGACTCAGAGA	2	Pde4a_-_21196662.23-P1|Pde4a_+_21196633.23-P1
Pilrb2	P1P2	Pilrb2_+_137872285.23-P1P2	GCTTGATTCTGCCTGGGCAC	1	Pilrb2_+_137872244.23-P1P2	GAGAAAGAGCAAGTTGCGAT	2	Pilrb2_+_137872285.23-P1P2|Pilrb2_+_137872244.23-P1P2
Slco6c1	P1P2	Slco6c1_+_97128536.23-P1P2	GTGAAGCCTGGAGATAGTGA	1	Slco6c1_+_97128525.23-P1P2	GGATAGTGATGGTTGGTTTC	2	Slco6c1_+_97128536.23-P1P2|Slco6c1_+_97128525.23-P1P2
Ahdc1	P1P2	Ahdc1_+_133011402.23-P1P2	GGCCACTCCGGCTGCTCCGA	1	Ahdc1_-_133011554.23-P1P2	GCTCGCAGAGGCAACGGCGG	2	Ahdc1_+_133011402.23-P1P2|Ahdc1_-_133011554.23-P1P2
Cyr61	P1P2	Cyr61_-_145650124.23-P1P2	GTGCTGCCAAGCACCTCCCC	1	Cyr61_+_145650001.23-P1P2	GCCTAGGCAGGCATTATAAA	2	Cyr61_-_145650124.23-P1P2|Cyr61_+_145650001.23-P1P2
Slit3	P1P2	Slit3_+_35121172.23-P1P2	GCCCCGGGAAGTCCGGCTCA	1	Slit3_+_35120913.23-P1P2	GTAGAGAGACCCAACTGGGA	2	Slit3_+_35121172.23-P1P2|Slit3_+_35120913.23-P1P2
Olfr575	ENSMUST00000084812.2	Olfr575_-_102955766.23-ENSMUST00000084812.2	GAAGTAAACTATGAGATGGT	1	Olfr575_+_102955677.23-ENSMUST00000084812.2	GCTCCGGCATATGTGGTAAA	2	Olfr575_-_102955766.23-ENSMUST00000084812.2|Olfr575_+_102955677.23-ENSMUST00000084812.2
Slc6a14	P1P2	Slc6a14_-_21714802.23-P1P2	GAAAGGAGGCAAGATTGCTA	1	Slc6a14_-_21714897.23-P1P2	GCTGCCCTTTCCTAGGGCTG	2	Slc6a14_-_21714802.23-P1P2|Slc6a14_-_21714897.23-P1P2
Irf2bpl	P1P2	Irf2bpl_+_86884942.23-P1P2	GggCCGACAGGGAGGAATCT	1	Irf2bpl_+_86884953.23-P1P2	GcgcggaggaggggCCGACA	2	Irf2bpl_+_86884942.23-P1P2|Irf2bpl_+_86884953.23-P1P2
Crem	ENSMUST00000151311.1	Crem_+_3327761.23-ENSMUST00000151311.1	GAAGCTAGATCATTTACCAG	1	Crem_+_3327713.23-ENSMUST00000151311.1	Gaattcgatctaagctagcc	2	Crem_+_3327761.23-ENSMUST00000151311.1|Crem_+_3327713.23-ENSMUST00000151311.1
Zfp131	ENSMUST00000177916.1	Zfp131_-_119790971.23-ENSMUST00000177916.1	GTCCCCGCGCGGCGCTTCGA	1	Zfp131_-_119790911.23-ENSMUST00000177916.1	GCCCCTGGGGCCCAGTAAGG	2	Zfp131_-_119790971.23-ENSMUST00000177916.1|Zfp131_-_119790911.23-ENSMUST00000177916.1
Vmn1r201	ENSMUST00000091730.1	Vmn1r201_-_22474432.23-ENSMUST00000091730.1	GTCCATGGGAATAGGAAAAA	1	Vmn1r201_-_22474424.23-ENSMUST00000091730.1	GTCGTCATTTCCATGGGAAT	2	Vmn1r201_-_22474432.23-ENSMUST00000091730.1|Vmn1r201_-_22474424.23-ENSMUST00000091730.1
Ddi1	P1P2	Ddi1_+_6266729.23-P1P2	GGAAAAAGGATGTAGAATAC	1	Ddi1_-_6266856.23-P1P2	GCACACAGGTACACCAGTTT	2	Ddi1_+_6266729.23-P1P2|Ddi1_-_6266856.23-P1P2
Shbg	P1P2	Shbg_+_69618043.23-P1P2	GCTGCAGGGGATACTAGTGG	1	Shbg_+_69618046.23-P1P2	GTGGCTGCAGGGGATACTAG	2	Shbg_+_69618043.23-P1P2|Shbg_+_69618046.23-P1P2
Bpifb3	P1P2	Bpifb3_+_153918195.23-P1P2	GGGGCTGGAAGAAATGCATA	1	Bpifb3_-_153918131.23-P1P2	GTGGCTGTGGGGGACCTGAA	2	Bpifb3_+_153918195.23-P1P2|Bpifb3_-_153918131.23-P1P2
Myh8	P1P2	Myh8_-_67276809.23-P1P2	GAGCCCTGGCGACGGCCCAA	1	Myh8_+_67277209.23-P1P2	GTGGGCTCTTGGCGGAGATA	2	Myh8_-_67276809.23-P1P2|Myh8_+_67277209.23-P1P2
Reg3b	P1P2	Reg3b_-_78370706.23-P1P2	GAGGTCGGCTAACGGGAAAG	1	Reg3b_-_78370699.23-P1P2	GGTAAAGCAGGTCGGCTAAC	2	Reg3b_-_78370706.23-P1P2|Reg3b_-_78370699.23-P1P2
Zbtb25	P1P2	Zbtb25_+_76369576.23-P1P2	GCCCGGCAGTCCGGTCACGT	1	Zbtb25_-_76369561.23-P1P2	GCCGGCGGGCTGCTCTCGCG	2	Zbtb25_+_76369576.23-P1P2|Zbtb25_-_76369561.23-P1P2
Il1f10	ENSMUST00000058056.1	Il1f10_-_24291077.23-ENSMUST00000058056.1	GAGAGCTGGGGAGACCTTTG	1	Il1f10_-_24291113.23-ENSMUST00000058056.1	GAGGGGTACGGAACAGCTTG	2	Il1f10_-_24291077.23-ENSMUST00000058056.1|Il1f10_-_24291113.23-ENSMUST00000058056.1
Cox7b	P1P2	Cox7b_+_106015638.23-P1P2	GCTAGTTCCTGCGAGGAAAT	1	Cox7b_-_106015520.23-P1P2	GCTGGTGCCTTATGTAAGGT	2	Cox7b_+_106015638.23-P1P2|Cox7b_-_106015520.23-P1P2
Ergic3	P1P2	Ergic3_-_156008014.23-P1P2	GCCTTTGAGGAGGCAGGTGA	1	Ergic3_-_156008062.23-P1P2	GCGCCTGCGCAAGACAGCGA	2	Ergic3_-_156008014.23-P1P2|Ergic3_-_156008062.23-P1P2
Tmem191c	P1P2	Tmem191c_+_17276218.23-P1P2	GCGCCCGAACCCAACCGAGA	1	Tmem191c_+_17276197.23-P1P2	Ggatcacgcccgaccaattc	2	Tmem191c_+_17276218.23-P1P2|Tmem191c_+_17276197.23-P1P2
Cct8	P1P2	Cct8_+_87496033.23-P1P2	GTTAGGACAAGGGACACGAA	1	Cct8_+_87495892.23-P1P2	GCGGGGCGACCGGAAGTAGG	2	Cct8_+_87496033.23-P1P2|Cct8_+_87495892.23-P1P2
Dusp22	P1P2	Dusp22_+_30659825.23-P1P2	GGAGGCAGGCGCAGCGGTAG	1	Dusp22_+_30659984.23-P1P2	GGGGACGCGGCATTACTGTC	2	Dusp22_+_30659825.23-P1P2|Dusp22_+_30659984.23-P1P2
Lrig1	P1P2	Lrig1_+_94700236.23-P1P2	GCCCCGGGGCCCCATCGGAG	1	Lrig1_-_94700323.23-P1P2	GCGCCCTGCCCGTTGCTCAT	2	Lrig1_+_94700236.23-P1P2|Lrig1_-_94700323.23-P1P2
2310022A10Rik	P1	2310022A10Rik_+_27553019.23-P1	GGGAAGGCGGGGCTAGGTTC	1	2310022A10Rik_+_27553164.23-P1	GCAACCAGCAAGAGAGTGTG	2	2310022A10Rik_+_27553019.23-P1|2310022A10Rik_+_27553164.23-P1
Fbxl4	P1P2	Fbxl4_+_22357544.23-P1P2	GCGACCCGGAAGGAAGACCG	1	Fbxl4_+_22357497.23-P1P2	Gcggggcggggcctggcgaa	2	Fbxl4_+_22357544.23-P1P2|Fbxl4_+_22357497.23-P1P2
Olfr212	ENSMUST00000075756.2	Olfr212_+_116506415.23-ENSMUST00000075756.2	GGCAGAAGGCTCCGGGGCCA	1	Olfr212_-_116506252.23-ENSMUST00000075756.2	GtctggGGAGGAAGCCAGCG	2	Olfr212_+_116506415.23-ENSMUST00000075756.2|Olfr212_-_116506252.23-ENSMUST00000075756.2
Zfp941	P1P2	Zfp941_-_140822294.23-P1P2	GGGCCCAATTCCTCTACCTT	1	Zfp941_+_140822275.23-P1P2	GATCCTAAGGTAGAGGAATT	2	Zfp941_-_140822294.23-P1P2|Zfp941_+_140822275.23-P1P2
Thnsl2	P1P2	Thnsl2_-_71144445.23-P1P2	GTGGAGAAGGGACTTCGGGG	1	Thnsl2_+_71144537.23-P1P2	GAGAGAATCCAGAGTCTGAA	2	Thnsl2_-_71144445.23-P1P2|Thnsl2_+_71144537.23-P1P2
Olfr1153	ENSMUST00000052300.1	Olfr1153_+_87895942.23-ENSMUST00000052300.1	GCAAATCTTGCCTACCCTTA	1	Olfr1153_-_87895949.23-ENSMUST00000052300.1	GTATTCAAATATAGTCCCTA	2	Olfr1153_+_87895942.23-ENSMUST00000052300.1|Olfr1153_-_87895949.23-ENSMUST00000052300.1
E2f6	P1P2	E2f6_-_16810747.23-P1P2	GAACCTGCAGTCCGCTGGTT	1	E2f6_-_16810894.23-P1P2	GAACACCCGGGCGTCGGCAG	2	E2f6_-_16810747.23-P1P2|E2f6_-_16810894.23-P1P2
Rabl5	P1P2	Rabl5_+_136907976.23-P1P2	GGCAACCTGAGCGTTCTGGA	1	Rabl5_+_136908090.23-P1P2	GAACAGCTGCGCAGTAGCCC	2	Rabl5_+_136907976.23-P1P2|Rabl5_+_136908090.23-P1P2
Matr3	P1P2	Matr3_-_35562072.23-P1P2	GGGGCCTGGGAGAACAACGC	1	Matr3_+_35562077.23-P1P2	GGGTAGGCACGTGACGTACG	2	Matr3_-_35562072.23-P1P2|Matr3_+_35562077.23-P1P2
Fkbp10	P1P2	Fkbp10_+_100415655.23-P1P2	GCCGCCCTGGCGGGTCCACG	1	Fkbp10_+_100415569.23-P1P2	GGGGCCAGGTTGAGAGTCTC	2	Fkbp10_+_100415655.23-P1P2|Fkbp10_+_100415569.23-P1P2
Myl4	P1P2	Myl4_-_104577056.23-P1P2	GAAGTCGGCTCATCCCTCTC	1	Myl4_+_104576887.23-P1P2	GCCCTGATGCTCAACAGTTC	2	Myl4_-_104577056.23-P1P2|Myl4_+_104576887.23-P1P2
Olfr348	ENSMUST00000056865.1	Olfr348_-_36786011.23-ENSMUST00000056865.1	GGGAGTGGGGAAGGTGTGAA	1	Olfr348_-_36786283.23-ENSMUST00000056865.1	GGTAACTCAGAATACCACTA	2	Olfr348_-_36786011.23-ENSMUST00000056865.1|Olfr348_-_36786283.23-ENSMUST00000056865.1
Syce2	P1P2	Syce2_-_84872086.23-P1P2	GAGCACCAGCATAGCCCAAA	1	Syce2_+_84871978.23-P1P2	GCGGGACTCGGGGTCACCTG	2	Syce2_-_84872086.23-P1P2|Syce2_+_84871978.23-P1P2
Tppp3	P1P2	Tppp3_+_105471578.23-P1P2	GAGGACCGCGGTTGAAGGGG	1	Tppp3_-_105471477.23-P1P2	GACCCCCTAGGCTGTCTCGG	2	Tppp3_+_105471578.23-P1P2|Tppp3_-_105471477.23-P1P2
Rgs16	P1P2	Rgs16_+_153740229.23-P1P2	GGCAGCGAGGGGAGTCTGAA	1	Rgs16_+_153740214.23-P1P2	GTGAAGGGGTGGGGCACGAC	2	Rgs16_+_153740229.23-P1P2|Rgs16_+_153740214.23-P1P2
Zfp583	P1P2	Zfp583_+_6331392.23-P1P2	GCTGGTTCTGACGACCGGAA	1	Zfp583_-_6331476.23-P1P2	GCTCTTAGACGAGGAGTCGG	2	Zfp583_+_6331392.23-P1P2|Zfp583_-_6331476.23-P1P2
Hsd3b3	ENSMUST00000090743.6	Hsd3b3_+_98753617.23-ENSMUST00000090743.6	GGGTACCTATTGGAATACGT	1	Hsd3b3_-_98753634.23-ENSMUST00000090743.6	GCACACCAACGTATTCCAAT	2	Hsd3b3_+_98753617.23-ENSMUST00000090743.6|Hsd3b3_-_98753634.23-ENSMUST00000090743.6
Mrpl30	P1P2	Mrpl30_-_37890414.23-P1P2	GGCGCCTGCGCTGTCTTCTA	1	Mrpl30_-_37890295.23-P1P2	GGCTATCGGAATCCTGTCCC	2	Mrpl30_-_37890414.23-P1P2|Mrpl30_-_37890295.23-P1P2
Vax2	P1P2	Vax2_+_83711095.23-P1P2	GCGCAACGGGAGTTCGTTCa	1	Vax2_+_83711122.23-P1P2	GGACTCTGGGTGGATCCAGT	2	Vax2_+_83711095.23-P1P2|Vax2_+_83711122.23-P1P2
C8b	P1P2	C8b_+_104766018.23-P1P2	GGCAAGGCCTGAAGACAGAT	1	C8b_-_104766161.23-P1P2	GAGAGGGGGGGATTGGTATG	2	C8b_+_104766018.23-P1P2|C8b_-_104766161.23-P1P2
H2-M3	P1P2	H2-M3_-_37269771.23-P1P2	GcaccccaAGTGATAATTAT	1	H2-M3_+_37270176.23-P1P2	GGAGAAGCGTCATCAGTATC	2	H2-M3_-_37269771.23-P1P2|H2-M3_+_37270176.23-P1P2
Sh3d19	P1P2	Sh3d19_+_86084387.23-P1P2	GCTGCGGGTGACGGCTGGAG	1	Sh3d19_+_86084392.23-P1P2	GTGAGGCTGCGGGTGACGGC	2	Sh3d19_+_86084387.23-P1P2|Sh3d19_+_86084392.23-P1P2
Capn5	P1P2	Capn5_-_98178456.23-P1P2	GGGAGAGCATCCCGGGACGT	1	Capn5_+_98178402.23-P1P2	GGCACTGGAGTGGGGTTTGA	2	Capn5_-_98178456.23-P1P2|Capn5_+_98178402.23-P1P2
4933409G03Rik	P1P2	4933409G03Rik_+_68582331.23-P1P2	GCCCAGTGATGCTGCAGAAG	1	4933409G03Rik_+_68582270.23-P1P2	GCGGCCCTACACTGAAATGA	2	4933409G03Rik_+_68582331.23-P1P2|4933409G03Rik_+_68582270.23-P1P2
Ntf3	P1	Ntf3_-_126165075.23-P1	GCCCGCCCGCAGTGACTTGC	1	Ntf3_+_126165111.23-P1	GAATGACTAGGTCTTCCCAT	2	Ntf3_-_126165075.23-P1|Ntf3_+_126165111.23-P1
Spink6	P1P2	Spink6_+_44071165.23-P1P2	GGCACCTTAGATCTTATTAA	1	Spink6_+_44071330.23-P1P2	GAGACAGCATGAAGGGAGTT	2	Spink6_+_44071165.23-P1P2|Spink6_+_44071330.23-P1P2
Sft2d3	ENSMUST00000054984.6	Sft2d3_+_31912201.23-ENSMUST00000054984.6	Ggctgagtgtgagacaaaaa	1	Sft2d3_+_31912025.23-ENSMUST00000054984.6	Gaaagcgatccaagactgtt	2	Sft2d3_+_31912201.23-ENSMUST00000054984.6|Sft2d3_+_31912025.23-ENSMUST00000054984.6
1810026J23Rik	P1P2	1810026J23Rik_+_21592794.23-P1P2	GCCGTTGTGTGGAGAAGGGT	1	1810026J23Rik_+_21592773.23-P1P2	GGCTCTGAAGGGAAGTCGAG	2	1810026J23Rik_+_21592794.23-P1P2|1810026J23Rik_+_21592773.23-P1P2
Sema4b	P2	Sema4b_+_80198483.23-P2	GGCAGGGAAGGTGGTCACGT	1	Sema4b_+_80198390.23-P2	GGCGCGGAGCAGGAAGTCGA	2	Sema4b_+_80198483.23-P2|Sema4b_+_80198390.23-P2
Prol1	P1P2	Prol1_+_88317093.23-P1P2	GTGGAACTCTGCAGTGTAGG	1	Prol1_+_88317116.23-P1P2	GTGACCCAGCACTGTCTAGC	2	Prol1_+_88317093.23-P1P2|Prol1_+_88317116.23-P1P2
Cenpp	P1P2	Cenpp_+_49652954.23-P1P2	GGGGATGGGCGGCCGTTGGA	1	Cenpp_+_49652974.23-P1P2	GTGGCCCAGTGGCCGTTAGA	2	Cenpp_+_49652954.23-P1P2|Cenpp_+_49652974.23-P1P2
Smim18	P1P2	Smim18_+_33747851.23-P1P2	GTATGAATGATCTACTCCTC	1	Smim18_-_33748036.23-P1P2	GTCTGAACAGTGTAGTGCTA	2	Smim18_+_33747851.23-P1P2|Smim18_-_33748036.23-P1P2
Cyp46a1	P1P2	Cyp46a1_-_108334261.23-P1P2	Ggggcgggtcctgagagcta	1	Cyp46a1_-_108334200.23-P1P2	GGCTCTgggcgggaacggcg	2	Cyp46a1_-_108334261.23-P1P2|Cyp46a1_-_108334200.23-P1P2
Mapk7	P1P2	Mapk7_+_61494352.23-P1P2	GcgcgcgcgcgTGATTGACA	1	Mapk7_-_61494400.23-P1P2	GgcgcccAGCTGTCCCACTC	2	Mapk7_+_61494352.23-P1P2|Mapk7_-_61494400.23-P1P2
Pdzd9	P1P2	Pdzd9_+_120670379.23-P1P2	GAAGCCGTGTGGCAACTACG	1	Pdzd9_+_120670309.23-P1P2	GCGAAGAGATGGACGGATCG	2	Pdzd9_+_120670379.23-P1P2|Pdzd9_+_120670309.23-P1P2
Sprr2b	ENSMUST00000061038.2	Sprr2b_+_92316573.23-ENSMUST00000061038.2	GCATCCGTAACTGGCTGGAC	1	Sprr2b_+_92316206.23-ENSMUST00000061038.2	GGCCCCCCTCAGTAAGCCAT	2	Sprr2b_+_92316573.23-ENSMUST00000061038.2|Sprr2b_+_92316206.23-ENSMUST00000061038.2
Btf3l4	P1P2	Btf3l4_+_108833715.23-P1P2	GCAGAATAGTGAGGTGCGCG	1	Btf3l4_+_108833706.23-P1P2	GGAGGTGCGCGAGGCATGCT	2	Btf3l4_+_108833715.23-P1P2|Btf3l4_+_108833706.23-P1P2
Dhrs1	P1P2	Dhrs1_-_55745638.23-P1P2	GGGAGTCCGCAAATGGGGAA	1	Dhrs1_+_55745697.23-P1P2	GGGCGCGCTCCGGACGCACG	2	Dhrs1_-_55745638.23-P1P2|Dhrs1_+_55745697.23-P1P2
Olfr722	ENSMUST00000053290.6	Olfr722_-_49902176.23-ENSMUST00000053290.6	GGTACTTTTTAAGTACTATA	1	Olfr722_-_49902278.23-ENSMUST00000053290.6	GATAACAATTAAGTTTACAA	2	Olfr722_-_49902176.23-ENSMUST00000053290.6|Olfr722_-_49902278.23-ENSMUST00000053290.6
Dus3l	P1P2	Dus3l_+_56764718.23-P1P2	GCGCGCGTGCGCACGACCGT	1	Dus3l_+_56764667.23-P1P2	GAGGAAACGGAAGTGCTCAA	2	Dus3l_+_56764718.23-P1P2|Dus3l_+_56764667.23-P1P2
Chchd6	P1P2	Chchd6_-_89595762.23-P1P2	GGGCGTGGCTCTCTGAGGTA	1	Chchd6_-_89595772.23-P1P2	GTCTGAGGTAGGGGTACCTG	2	Chchd6_-_89595762.23-P1P2|Chchd6_-_89595772.23-P1P2
Wnt9a	P1P2	Wnt9a_+_59306712.23-P1P2	GCTGGGGCGCGCTGTGGGGA	1	Wnt9a_+_59306815.23-P1P2	Gcccggaggaggggtcacgc	2	Wnt9a_+_59306712.23-P1P2|Wnt9a_+_59306815.23-P1P2
Rbp2	P1P2	Rbp2_+_98490335.23-P1P2	GCCTTGGAGCAGCTCATTTT	1	Rbp2_+_98490423.23-P1P2	GGCAAAGTTCAACAGGTCTG	2	Rbp2_+_98490335.23-P1P2|Rbp2_+_98490423.23-P1P2
Olfr173	ENSMUST00000049940.4	Olfr173_+_58798030.23-ENSMUST00000049940.4	Gctagcatataaaacacaat	1	Olfr173_+_58798123.23-ENSMUST00000049940.4	GATATTTCATGCAACTATGA	2	Olfr173_+_58798030.23-ENSMUST00000049940.4|Olfr173_+_58798123.23-ENSMUST00000049940.4
Bcl11a	P1	Bcl11a_+_24077903.23-P1	GCCAATGGCCAGTGCGGGGC	1	Bcl11a_+_24077756.23-P1	GGTGGCCCGGAGAGAAGAAA	2	Bcl11a_+_24077903.23-P1|Bcl11a_+_24077756.23-P1
Scgb2b19	ENSMUST00000179688.1	Scgb2b19_+_33280502.23-ENSMUST00000179688.1	GGTTGTTGGATCTTCAGAGT	1	Scgb2b19_+_33280854.23-ENSMUST00000179688.1	GACTACATGAATGAGCAATG	2	Scgb2b19_+_33280502.23-ENSMUST00000179688.1|Scgb2b19_+_33280854.23-ENSMUST00000179688.1
Coa4	P1P2	Coa4_+_100536988.23-P1P2	GTCTTCCGGGAAAGGGCGGA	1	Coa4_+_100536955.23-P1P2	GGGAGACCGGATCCTAGGGA	2	Coa4_+_100536988.23-P1P2|Coa4_+_100536955.23-P1P2
Ctla2a	P1P2	Ctla2a_-_60936745.23-P1P2	GCTGATCAGACCCAAGGAAC	1	Ctla2a_-_60936587.23-P1P2	GAGGAGGCTGGTGGTACTTG	2	Ctla2a_-_60936745.23-P1P2|Ctla2a_-_60936587.23-P1P2
Teddm1	P1P2	Teddm1_+_153891575.23-P1P2	GGGGAACTGAGTGGGTTCTT	1	Teddm1_-_153891541.23-P1P2	GAGGAAGGAAACTTGAGCCG	2	Teddm1_+_153891575.23-P1P2|Teddm1_-_153891541.23-P1P2
6430548M08Rik	P1P2	6430548M08Rik_-_120113858.23-P1P2	GAACCCGCGCGGCTGTCGGG	1	6430548M08Rik_+_120113829.23-P1P2	GCAGCCGCGCGGGTTCGCTC	2	6430548M08Rik_-_120113858.23-P1P2|6430548M08Rik_+_120113829.23-P1P2
Rsph6a	P1P2	Rsph6a_-_19054537.23-P1P2	GACAGCTGCGGGAGTTTGGG	1	Rsph6a_+_19054656.23-P1P2	GGCGCCCTCAGGGTGAGAAA	2	Rsph6a_-_19054537.23-P1P2|Rsph6a_+_19054656.23-P1P2
Slc25a53	ENSMUST00000171738.1	Slc25a53_+_136993294.23-ENSMUST00000171738.1	GCCTCAGAGCTGTCTGGGTT	1	Slc25a53_+_136993247.23-ENSMUST00000171738.1	GGGTAGCAGAGTCGCAGCCG	2	Slc25a53_+_136993294.23-ENSMUST00000171738.1|Slc25a53_+_136993247.23-ENSMUST00000171738.1
Uap1l1	P1P2	Uap1l1_-_25365757.23-P1P2	GCCCGCCCCTTTTTCCTCTT	1	Uap1l1_+_25365740.23-P1P2	GGCAGCCCAAGAGGAAAAAG	2	Uap1l1_-_25365757.23-P1P2|Uap1l1_+_25365740.23-P1P2
Vil1	P1P2	Vil1_-_74409219.23-P1P2	GGCGGGGCACACGGCAGCTC	1	Vil1_+_74409281.23-P1P2	GGGGCCCCAGAGAGAATGGA	2	Vil1_-_74409219.23-P1P2|Vil1_+_74409281.23-P1P2
Fga	P1P2	Fga_-_83025924.23-P1P2	GTTCCAAGGCCCCCATTTCC	1	Fga_+_83026039.23-P1P2	GGCTCTGACCATAATAACCA	2	Fga_-_83025924.23-P1P2|Fga_+_83026039.23-P1P2
BC089491	P1P2	BC089491_+_28291283.23-P1P2	GTGGGTGGGGATAGGGACAG	1	BC089491_+_28291269.23-P1P2	GGACAGGGGCGGTGTCTATT	2	BC089491_+_28291283.23-P1P2|BC089491_+_28291269.23-P1P2
Vmn1r62	ENSMUST00000173956.1	Vmn1r62_+_5674485.23-ENSMUST00000173956.1	Gaaggtcactcagtagttaa	1	Vmn1r62_+_5674437.23-ENSMUST00000173956.1	Gaattcaaggcaaacaatgg	2	Vmn1r62_+_5674485.23-ENSMUST00000173956.1|Vmn1r62_+_5674437.23-ENSMUST00000173956.1
Slc6a15	P1P2	Slc6a15_+_103367558.23-P1P2	GAGGCCCGCGGCGGGATATT	1	Slc6a15_+_103367567.23-P1P2	GCACAGAGCTAGGCCCGCGG	2	Slc6a15_+_103367558.23-P1P2|Slc6a15_+_103367567.23-P1P2
Trib3	P1P2	Trib3_+_152344127.23-P1P2	GCGTGTGGCCCCGAAGGTGA	1	Trib3_+_152344195.23-P1P2	GCTACAATACGGAGAGTCGG	2	Trib3_+_152344127.23-P1P2|Trib3_+_152344195.23-P1P2
Gm5538	P1P2	Gm5538_+_59729432.23-P1P2	Gggaggggttcccagcaata	1	Gm5538_+_59729556.23-P1P2	GCAGCAATGCACAATTAAGT	2	Gm5538_+_59729432.23-P1P2|Gm5538_+_59729556.23-P1P2
Thumpd2	P1P2	Thumpd2_-_81065286.23-P1P2	GGGGCCGAACCGGTGAACTC	1	Thumpd2_-_81065226.23-P1P2	GAGGCATCTCTGATTGTCAA	2	Thumpd2_-_81065286.23-P1P2|Thumpd2_-_81065226.23-P1P2
Vav1	P1P2	Vav1_-_57278964.23-P1P2	GGCCCAGGTCTGCTCAGTGT	1	Vav1_-_57279007.23-P1P2	GCAGTGAGTGGAAGCTGTGA	2	Vav1_-_57278964.23-P1P2|Vav1_-_57279007.23-P1P2
Hdac5	P1P2	Hdac5_-_102230329.23-P1P2	GCCAGCCCAAGGTTAGGCTG	1	Hdac5_-_102230409.23-P1P2	GCGGACCCCGGCTGCTGCAG	2	Hdac5_-_102230329.23-P1P2|Hdac5_-_102230409.23-P1P2
Taf7l	P2	Taf7l_+_134476714.23-P2	GCCAACAAGTATACTTCTAG	1	Taf7l_+_134476693.23-P2	GGAAATGATTGTACAAGTCT	2	Taf7l_+_134476714.23-P2|Taf7l_+_134476693.23-P2
Arhgap33	P1P2	Arhgap33_-_30535195.23-P1P2	GCCACAAGGCGGCTGCTTAT	1	Arhgap33_+_30535252.23-P1P2	GTGGCGCTGTCAAACTTCGG	2	Arhgap33_-_30535195.23-P1P2|Arhgap33_+_30535252.23-P1P2
Tmem176b	P1P2	Tmem176b_-_48841163.23-P1P2	GGGAAAGGGCCCCACTTGAG	1	Tmem176b_-_48841210.23-P1P2	GCCTGCTGGAGCAGGGATAC	2	Tmem176b_-_48841163.23-P1P2|Tmem176b_-_48841210.23-P1P2
Krtap19-1	P1P2	Krtap19-1_+_88869703.23-P1P2	GATAAAAAGAAATTCTGTTA	1	Krtap19-1_+_88869646.23-P1P2	GCTTCTAATAAATTCTCATA	2	Krtap19-1_+_88869703.23-P1P2|Krtap19-1_+_88869646.23-P1P2
Lca5	P1P2	Lca5_-_83441354.23-P1P2	GGGGACGCCGGCTCCAGAAA	1	Lca5_+_83441231.23-P1P2	GCGCCTCACCGGCCCACCAA	2	Lca5_-_83441354.23-P1P2|Lca5_+_83441231.23-P1P2
Spata2	P1P2	Spata2_-_167493054.23-P1P2	GGAACCGGACCTCACTCCTA	1	Spata2_-_167493012.23-P1P2	GGAGAGGCGGCGGCAGTAGG	2	Spata2_-_167493054.23-P1P2|Spata2_-_167493012.23-P1P2
Gpbp1	P1P2	Gpbp1_+_111490042.23-P1P2	GGGGCCAGAAGGTTCTGTGG	1	Gpbp1_+_111490100.23-P1P2	GccccAGGCGCCGACGTAGA	2	Gpbp1_+_111490042.23-P1P2|Gpbp1_+_111490100.23-P1P2
P2ry4	P1P2	P2ry4_+_100594948.23-P1P2	GctagctctgacaatctgtT	1	P2ry4_-_100594907.23-P1P2	GCCAGAGGGCATATTCTCGG	2	P2ry4_+_100594948.23-P1P2|P2ry4_-_100594907.23-P1P2
Fbxl2	P1P2	Fbxl2_+_114026853.23-P1P2	GGCGTGGGGCAAGGAGAAGT	1	Fbxl2_-_114026792.23-P1P2	GCCCGCCCCGGCCTCAAGGT	2	Fbxl2_+_114026853.23-P1P2|Fbxl2_-_114026792.23-P1P2
Casc3	P1P2	Casc3_+_98809669.23-P1P2	GGACGTCTGTCGGTGATGTA	1	Casc3_+_98809713.23-P1P2	GGGGCGGGGCCTGCACCCTG	2	Casc3_+_98809669.23-P1P2|Casc3_+_98809713.23-P1P2
Vmn2r116	ENSMUST00000164856.1	Vmn2r116_-_23384302.23-ENSMUST00000164856.1	GATCAAAGGGTCTAAACATG	1	Vmn2r116_+_23384311.23-ENSMUST00000164856.1	GGTTCACAAATCTTCAGAGA	2	Vmn2r116_-_23384302.23-ENSMUST00000164856.1|Vmn2r116_+_23384311.23-ENSMUST00000164856.1
Npw	P1P2	Npw_-_24658748.23-P1P2	GCCCAGAAAGGGAACTGTCA	1	Npw_+_24658543.23-P1P2	GCCGGGGCGGGGCCACTGAA	2	Npw_-_24658748.23-P1P2|Npw_+_24658543.23-P1P2
5730559C18Rik	P2	5730559C18Rik_-_136234188.23-P2	GACGGGGCGGGGCCTCACGT	1	5730559C18Rik_-_136234144.23-P2	GAGAGGGGAAGATGCTAGAA	2	5730559C18Rik_-_136234188.23-P2|5730559C18Rik_-_136234144.23-P2
Nrap	P1P2	Nrap_-_56390249.23-P1P2	GGGGGGGCGGTCAGATGCTT	1	Nrap_-_56390386.23-P1P2	GAGGCGGATCCCCAGACTAT	2	Nrap_-_56390249.23-P1P2|Nrap_-_56390386.23-P1P2
Dlg4	P1	Dlg4_+_70018302.23-P1	GCACAAGCAGAGAGGCCCTA	1	Dlg4_+_70018333.23-P1	GGGAACCCGGATAATGGGAA	2	Dlg4_+_70018302.23-P1|Dlg4_+_70018333.23-P1
Ccdc85b	P1P2	Ccdc85b_+_5457667.23-P1P2	GGTGACACCCAGGTCCGGAG	1	Ccdc85b_+_5457640.23-P1P2	GAAAAGAGAGCTACAGGCTT	2	Ccdc85b_+_5457667.23-P1P2|Ccdc85b_+_5457640.23-P1P2
Setd1b	P1P2	Setd1b_+_123142107.23-P1P2	GTCCCCAGGCACTCTCCCGG	1	Setd1b_-_123142125.23-P1P2	GCCGCCGCCGGGAGAGTGCC	2	Setd1b_+_123142107.23-P1P2|Setd1b_-_123142125.23-P1P2
Cpt1a	P1P2	Cpt1a_+_3323281.23-P1P2	Ggacgcgcgccgcgggtgat	1	Cpt1a_-_3323033.23-P1P2	GGGGTTGCAGAGAAGTTTAC	2	Cpt1a_+_3323281.23-P1P2|Cpt1a_-_3323033.23-P1P2
2610301B20Rik	P1P2	2610301B20Rik_+_10874436.23-P1P2	GGACGGGCGCGCACTCGCGG	1	2610301B20Rik_-_10874395.23-P1P2	GGACCCACCGACAACATCCG	2	2610301B20Rik_+_10874436.23-P1P2|2610301B20Rik_-_10874395.23-P1P2
Rabgap1	P1	Rabgap1_-_37443177.23-P1	GGGACCCAACGGAACCGGAA	1	Rabgap1_+_37443159.23-P1	GCTGCCCTTCCGGTTCCGTT	2	Rabgap1_-_37443177.23-P1|Rabgap1_+_37443159.23-P1
Ctnnd1	P1P2	Ctnnd1_-_84650814.23-P1P2	GAGGAACCAGGCATAAATCA	1	Ctnnd1_+_84650745.23-P1P2	GACTTAGGAAAGCTAGGGTA	2	Ctnnd1_-_84650814.23-P1P2|Ctnnd1_+_84650745.23-P1P2
Zbtb2	P1P2	Zbtb2_-_4388078.23-P1P2	GCGGAGCGACTAGTGCAAAG	1	Zbtb2_+_4387471.23-P1P2	GAGGGCGGGCGCAAGGGGAG	2	Zbtb2_-_4388078.23-P1P2|Zbtb2_+_4387471.23-P1P2
Asb15	P1P2	Asb15_+_24527538.23-P1P2	GCGCTGGACGCTGTCATGGC	1	Asb15_-_24527582.23-P1P2	GCTCCAGCGCACAGCCCTCT	2	Asb15_+_24527538.23-P1P2|Asb15_-_24527582.23-P1P2
Ncbp2	P1P2	Ncbp2_-_31948449.23-P1P2	GAGCAGCCGCCGGAAGACCA	1	Ncbp2_+_31948470.23-P1P2	GAGGCGAAGGCAGCGAGCGT	2	Ncbp2_-_31948449.23-P1P2|Ncbp2_+_31948470.23-P1P2
B4galnt2	P1P2	B4galnt2_-_95915059.23-P1P2	GTCCCGGTACATGATCCCTC	1	B4galnt2_-_95915043.23-P1P2	GGCGCCAGGAGCCTATGTCC	2	B4galnt2_-_95915059.23-P1P2|B4galnt2_-_95915043.23-P1P2
Dynlt3	P1P2	Dynlt3_-_9663082.23-P1P2	GAGGGCGGGGTTAAAGGACA	1	Dynlt3_+_9663107.23-P1P2	GTACCCTTAGCCCCGCTAAA	2	Dynlt3_-_9663082.23-P1P2|Dynlt3_+_9663107.23-P1P2
Serpini1	P1P2	Serpini1_-_75557367.23-P1P2	GGGCCAGGTGCGATGCCAGA	1	Serpini1_-_75557387.23-P1P2	GGGGAGAAAGTCCGAAATGA	2	Serpini1_-_75557367.23-P1P2|Serpini1_-_75557387.23-P1P2
1700066M21Rik	P1P2	1700066M21Rik_+_57377525.23-P1P2	GGCTGGAGGAAGGACGTTTG	1	1700066M21Rik_+_57377483.23-P1P2	GCGGGAAGTTCGAACGGACG	2	1700066M21Rik_+_57377525.23-P1P2|1700066M21Rik_+_57377483.23-P1P2
Snapin	P1P2	Snapin_+_90491028.23-P1P2	GCTCTCGCGGTGCACAGCGG	1	Snapin_+_90491111.23-P1P2	GGGTCCCGGCCCGCTTGCCG	2	Snapin_+_90491028.23-P1P2|Snapin_+_90491111.23-P1P2
Mettl23	P1P2	Mettl23_-_116843373.23-P1P2	GGCCACCGGAGCTTTGGGTT	1	Mettl23_+_116843550.23-P1P2	GCGGCCGGAAGGAGACCGCA	2	Mettl23_-_116843373.23-P1P2|Mettl23_+_116843550.23-P1P2
Mcmdc2	P1P2	Mcmdc2_-_9908634.23-P1P2	GCCCGCGCGCGCCCGACAGT	1	Mcmdc2_-_9908595.23-P1P2	GGGTTGCCCTGGTGACAGAA	2	Mcmdc2_-_9908634.23-P1P2|Mcmdc2_-_9908595.23-P1P2
Vdac1	P1P2	Vdac1_+_52360919.23-P1P2	GGCCGCGCTCTCGCCCTCTG	1	Vdac1_-_52361000.23-P1P2	GCTGTCCGGGGTGGAGCCGA	2	Vdac1_+_52360919.23-P1P2|Vdac1_-_52361000.23-P1P2
Ptprt	P1P2	Ptprt_+_162661238.23-P1P2	GAGCCCGCGAGTGGCAGCCG	1	Ptprt_+_162661262.23-P1P2	GAGCCCGGGAGAGGGTGCGT	2	Ptprt_+_162661238.23-P1P2|Ptprt_+_162661262.23-P1P2
Dagla	P1P2	Dagla_-_10305052.23-P1P2	GCGCCCCCTAGCGCCAGGGA	1	Dagla_+_10305035.23-P1P2	GTCTCCCCTCCCTGGCGCTA	2	Dagla_-_10305052.23-P1P2|Dagla_+_10305035.23-P1P2
Naa11	P1P2	Naa11_-_97392498.23-P1P2	GAGAGGAGCTGAGTCCTTCT	1	Naa11_-_97392385.23-P1P2	GCCTACGGGCGGAAGGGGCG	2	Naa11_-_97392498.23-P1P2|Naa11_-_97392385.23-P1P2
Tnn	P1P2	Tnn_-_160154033.23-P1P2	GGAGAGGCAAGGCTCTGAAT	1	Tnn_-_160153838.23-P1P2	GAAAACGTTTGCATGTCTCC	2	Tnn_-_160154033.23-P1P2|Tnn_-_160153838.23-P1P2
Tmem30b	P1P2	Tmem30b_+_73546565.23-P1P2	GCAGGGGCGGAGCCAGTCCC	1	Tmem30b_-_73546604.23-P1P2	GCCTGCATGGCGCCCTTCCC	2	Tmem30b_+_73546565.23-P1P2|Tmem30b_-_73546604.23-P1P2
Fbxw11	P1P2	Fbxw11_+_32642355.23-P1P2	GCATGCGCAGTGGGTGTCTG	1	Fbxw11_+_32642603.23-P1P2	GAGAGCACCTAGGGGAGCGC	2	Fbxw11_+_32642355.23-P1P2|Fbxw11_+_32642603.23-P1P2
Olfr632	ENSMUST00000098189.1	Olfr632_-_103937205.23-ENSMUST00000098189.1	GacacaACCGATGGGTAAAT	1	Olfr632_+_103937250.23-ENSMUST00000098189.1	GTGGTCTCCATTAGACTCAA	2	Olfr632_-_103937205.23-ENSMUST00000098189.1|Olfr632_+_103937250.23-ENSMUST00000098189.1
Dnajc28	P1P2	Dnajc28_-_91619101.23-P1P2	GGTGCAGAGTAGAGGCATTA	1	Dnajc28_-_91619241.23-P1P2	GGGACACCTGCACCGTCAGT	2	Dnajc28_-_91619101.23-P1P2|Dnajc28_-_91619241.23-P1P2
Slc9a8	P1P2	Slc9a8_+_167421582.23-P1P2	GGGGAGTGGGACGACCTCTG	1	Slc9a8_+_167421408.23-P1P2	GGCCCCGCGTGAGAATCCCA	2	Slc9a8_+_167421582.23-P1P2|Slc9a8_+_167421408.23-P1P2
Creb3l2	P1P2	Creb3l2_+_37442202.23-P1P2	GCGGGCGTTCGATTGGTCAC	1	Creb3l2_-_37442314.23-P1P2	GGAAGTCTCCGCCTAGTCCT	2	Creb3l2_+_37442202.23-P1P2|Creb3l2_-_37442314.23-P1P2
Nme7	P1P2	Nme7_-_164307514.23-P1P2	GCAGACGGAAGTGAACGCGT	1	Nme7_-_164307559.23-P1P2	GGCCCCAGGCGATGAGGCAA	2	Nme7_-_164307514.23-P1P2|Nme7_-_164307559.23-P1P2
Ddx52	P1P2	Ddx52_-_83942134.23-P1P2	GAGCAGTCGCGGATAGAAAG	1	Ddx52_+_83942053.23-P1P2	GAGCCTGGCTGTGATAGGCG	2	Ddx52_-_83942134.23-P1P2|Ddx52_+_83942053.23-P1P2
Zmym4	P1P2	Zmym4_+_126968255.23-P1P2	GCGCGCACGCTCAGGACCGG	1	Zmym4_+_126968193.23-P1P2	GCATCAGGGGCGCGCGCAAG	2	Zmym4_+_126968255.23-P1P2|Zmym4_+_126968193.23-P1P2
Tmem63c	P1P2	Tmem63c_+_87026309.23-P1P2	GGCACAAGGCTGCCGCTCCC	1	Tmem63c_+_87026147.23-P1P2	Gtagcactgtgccacaccct	2	Tmem63c_+_87026309.23-P1P2|Tmem63c_+_87026147.23-P1P2
Erp29	P1P2	Erp29_-_121452556.23-P1P2	GGCTGCGCATGCGTCGTAGG	1	Erp29_+_121452742.23-P1P2	GGGACCGCCCAGCGCAGGGA	2	Erp29_-_121452556.23-P1P2|Erp29_+_121452742.23-P1P2
1700084C01Rik	P1P2	1700084C01Rik_+_169928816.23-P1P2	GCCTCCTGCGACCCCTGGTT	1	1700084C01Rik_-_169928811.23-P1P2	GCCAAGGCTCGAGGAGTCGA	2	1700084C01Rik_+_169928816.23-P1P2|1700084C01Rik_-_169928811.23-P1P2
Ndrg1	P1P2	Ndrg1_-_66969784.23-P1P2	GCTCGTGCTGCACCCTGCCT	1	Ndrg1_+_66969824.23-P1P2	GTCCAGTCGCGCCCCTGCAA	2	Ndrg1_-_66969784.23-P1P2|Ndrg1_+_66969824.23-P1P2
Insm2	P1P2	Insm2_+_55598790.23-P1P2	GCCCTTGGGGAAGAGGAGTG	1	Insm2_-_55598897.23-P1P2	GTGCCAGCACGCACGATCTG	2	Insm2_+_55598790.23-P1P2|Insm2_-_55598897.23-P1P2
Neurod2	P1P2	Neurod2_-_98330053.23-P1P2	GGGGTCAGGACCAGACCCTG	1	Neurod2_+_98329740.23-P1P2	GAGATGGCGGCGGGTCCCGG	2	Neurod2_-_98330053.23-P1P2|Neurod2_+_98329740.23-P1P2
Lepre1	P1P2	Lepre1_+_119233005.23-P1P2	GGCAACCCGTAAGGCGGCGG	1	Lepre1_-_119232806.23-P1P2	GCTCACGAAGAGTAAGTGTT	2	Lepre1_+_119233005.23-P1P2|Lepre1_-_119232806.23-P1P2
Mtor	P1P2	Mtor_+_148448405.23-P1P2	GGGCAAGCAAAAGGAGGCGA	1	Mtor_+_148448522.23-P1P2	GAGCGGGCCGAGCTCGAAGA	2	Mtor_+_148448405.23-P1P2|Mtor_+_148448522.23-P1P2
Cd2bp2	P1P2	Cd2bp2_+_127196082.23-P1P2	GGCGAGTCGGCCTTGGCTAA	1	Cd2bp2_+_127196333.23-P1P2	GAAGCCCGGGTGTCTACTGA	2	Cd2bp2_+_127196082.23-P1P2|Cd2bp2_+_127196333.23-P1P2
Cdc14b	P2	Cdc14b_-_64248761.23-P2	GAGGTCAGCCGCCCTGCAGA	1	Cdc14b_-_64248882.23-P2	GAGACCAGATGTCTTGAAAA	2	Cdc14b_-_64248761.23-P2|Cdc14b_-_64248882.23-P2
Bckdhb	P1P2	Bckdhb_-_83924975.23-P1P2	GGACCCAGGGACCACATCTC	1	Bckdhb_+_83924999.23-P1P2	GACCTGGCGGCCCGCCCAGA	2	Bckdhb_-_83924975.23-P1P2|Bckdhb_+_83924999.23-P1P2
Sptlc2	P1P2	Sptlc2_-_87388360.23-P1P2	GCCGAAGCCCGGCAGCCGGA	1	Sptlc2_-_87388372.23-P1P2	GAGCCGGAGGGAACATGGGG	2	Sptlc2_-_87388360.23-P1P2|Sptlc2_-_87388372.23-P1P2
Smco4	ENSMUST00000178999.1	Smco4_-_15520791.23-ENSMUST00000178999.1	Ggcaccatgcccaggcaagt	1	Smco4_+_15520687.23-ENSMUST00000178999.1	Gcccatcgtgtaatctggta	2	Smco4_-_15520791.23-ENSMUST00000178999.1|Smco4_+_15520687.23-ENSMUST00000178999.1
Trap1	P1P2	Trap1_-_4078043.23-P1P2	GGTGCTGGCGGTCCCTAGGC	1	Trap1_-_4077901.23-P1P2	GGCGTTGCCTGTGCGAGAAC	2	Trap1_-_4078043.23-P1P2|Trap1_-_4077901.23-P1P2
Mms19	P1P2	Mms19_+_41981263.23-P1P2	GGGGCCGTTAGGTCCCTGAA	1	Mms19_+_41981352.23-P1P2	GTATGCGCCCTCAACCGCCC	2	Mms19_+_41981263.23-P1P2|Mms19_+_41981352.23-P1P2
Olfr1020	ENSMUST00000055840.4	Olfr1020_+_85849076.23-ENSMUST00000055840.4	GGACCTGAGGTACTTTACAT	1	Olfr1020_+_85849097.23-ENSMUST00000055840.4	GTGAGTCATAAATGACAAAG	2	Olfr1020_+_85849076.23-ENSMUST00000055840.4|Olfr1020_+_85849097.23-ENSMUST00000055840.4
Ube3a	P1P2	Ube3a_+_59228580.23-P1P2	GGCGCAGGGGCCTTTGGGAA	1	Ube3a_+_59228719.23-P1P2	GCGCCAACCCTGCCGGGCGA	2	Ube3a_+_59228580.23-P1P2|Ube3a_+_59228719.23-P1P2
Ift27	P1P2	Ift27_-_78174193.23-P1P2	GAGAAGGAGGCGGGGAAAAC	1	Ift27_-_78174348.23-P1P2	GCCGGAGGCGGGAATTAATG	2	Ift27_-_78174193.23-P1P2|Ift27_-_78174348.23-P1P2
Ints12	P1P2	Ints12_-_133091462.23-P1P2	Ggggctggcaagactctcaa	1	Ints12_+_133091829.23-P1P2	GAGACAGCAGGAAGTGACGT	2	Ints12_-_133091462.23-P1P2|Ints12_+_133091829.23-P1P2
U2af1l4	P1P2	U2af1l4_+_30563175.23-P1P2	GGCGTACAACGTAGCGGAGG	1	U2af1l4_+_30563178.23-P1P2	GCATGCGTACAACGTAGCGG	2	U2af1l4_+_30563175.23-P1P2|U2af1l4_+_30563178.23-P1P2
Inpp5d	P1P2	Inpp5d_-_87620153.23-P1P2	GCGTCCCTCGTGTGGAACTT	1	Inpp5d_-_87620145.23-P1P2	GAGCCCTTGCGTCCCTCGTG	2	Inpp5d_-_87620153.23-P1P2|Inpp5d_-_87620145.23-P1P2
Olfr92	ENSMUST00000168659.1	Olfr92_+_37112470.23-ENSMUST00000168659.1	GTCCTGAAATAGTATACCAA	1	Olfr92_+_37112356.23-ENSMUST00000168659.1	GCACAGTTGCTTATAATTGC	2	Olfr92_+_37112470.23-ENSMUST00000168659.1|Olfr92_+_37112356.23-ENSMUST00000168659.1
Depdc1a	P1P2	Depdc1a_-_159495246.23-P1P2	GGAGCCCCTAGAATCAAGAA	1	Depdc1a_+_159495390.23-P1P2	GTCCGAGCGAAGCTGATTGG	2	Depdc1a_-_159495246.23-P1P2|Depdc1a_+_159495390.23-P1P2
Arpc2	P1P2	Arpc2_-_74236446.23-P1P2	Gtgcacgcgcgaggtcgaag	1	Arpc2_-_74236332.23-P1P2	GGGGAATGACAGGTGAGCGT	2	Arpc2_-_74236446.23-P1P2|Arpc2_-_74236332.23-P1P2
Slc16a9	P1P2	Slc16a9_+_70245181.23-P1P2	GCACCCCGGGAAGTCACTCC	1	Slc16a9_-_70245198.23-P1P2	GCACCCCGGGAGTGACTTCC	2	Slc16a9_+_70245181.23-P1P2|Slc16a9_-_70245198.23-P1P2
Sun1	P1P2	Sun1_+_139200467.23-P1P2	GGACGTGTGGCGTCAGTGGG	1	Sun1_-_139200543.23-P1P2	GGGGTCAGCGGCCTCCCCAT	2	Sun1_+_139200467.23-P1P2|Sun1_-_139200543.23-P1P2
Trip11	P1P2	Trip11_+_101913240.23-P1P2	GTACGCGGAAGTCACGGATC	1	Trip11_-_101913221.23-P1P2	GAAGGACCGTGGGATCGCGG	2	Trip11_+_101913240.23-P1P2|Trip11_-_101913221.23-P1P2
Clec9a	P1P2	Clec9a_-_129408693.23-P1P2	GTCCAGCATCTGATACTATG	1	Clec9a_+_129408877.23-P1P2	GTTCGGTTGTAGTTAGGAGT	2	Clec9a_-_129408693.23-P1P2|Clec9a_+_129408877.23-P1P2
Maged1	P1P2	Maged1_+_94542191.23-P1P2	GTGGCGGTGGGATAGTGTGC	1	Maged1_+_94542322.23-P1P2	GGCATTGCGGAGAAAGGTAG	2	Maged1_+_94542191.23-P1P2|Maged1_+_94542322.23-P1P2
Olfr531	ENSMUST00000080153.1	Olfr531_+_140401292.23-ENSMUST00000080153.1	GGAAAGATCCCGAATCTCTA	1	Olfr531_+_140401156.23-ENSMUST00000080153.1	GGGTGAGTCTCACCATATCT	2	Olfr531_+_140401292.23-ENSMUST00000080153.1|Olfr531_+_140401156.23-ENSMUST00000080153.1
Rbm19	P1P2	Rbm19_+_120116349.23-P1P2	GGGGCCTCTAAATCCCCGCA	1	Rbm19_+_120116307.23-P1P2	GCCAACCCCCTCGGGATGAC	2	Rbm19_+_120116349.23-P1P2|Rbm19_+_120116307.23-P1P2
Chat	P2	Chat_+_32465951.23-P2	GCACACTGGGCCCAACGCAT	1	Chat_+_32465991.23-P2	GGGGCCTCACGTGCCATCTA	2	Chat_+_32465951.23-P2|Chat_+_32465991.23-P2
Actn3	P1P2	Actn3_-_4878048.23-P1P2	GGTGCTGGAGTCAAAGATTG	1	Actn3_-_4878059.23-P1P2	GAAAGATTGCGGAATCGCGG	2	Actn3_-_4878048.23-P1P2|Actn3_-_4878059.23-P1P2
Cdk10	P1P2	Cdk10_+_123224807.23-P1P2	GCAGGCGCATGACGTACTTC	1	Cdk10_-_123224600.23-P1P2	GTCTGGAAGGGCAGAAAGCA	2	Cdk10_+_123224807.23-P1P2|Cdk10_-_123224600.23-P1P2
Bend3	P1P2	Bend3_+_43478997.23-P1P2	GCGGGCGTGAGCGACCGCGG	1	Bend3_-_43478900.23-P1P2	GCCGCGGGGCGCTTTCCCGT	2	Bend3_+_43478997.23-P1P2|Bend3_-_43478900.23-P1P2
Olfr117	ENSMUST00000073636.2	Olfr117_-_37660446.23-ENSMUST00000073636.2	GGACCCTAAAGGTGGAAGAT	1	Olfr117_+_37660427.23-ENSMUST00000073636.2	GAACCCATCTTCCACCTTTA	2	Olfr117_-_37660446.23-ENSMUST00000073636.2|Olfr117_+_37660427.23-ENSMUST00000073636.2
Zfp46	P2	Zfp46_+_136285919.23-P2	GGGGACTTGGAGTTTCACTC	1	Zfp46_+_136285866.23-P2	GGGGAGGGAAAAGAACAAAA	2	Zfp46_+_136285919.23-P2|Zfp46_+_136285866.23-P2
Otop2	P1P2	Otop2_-_115307022.23-P1P2	GAGCCCTGAGGAGCTTGCGG	1	Otop2_+_115307062.23-P1P2	GAGGGCCAAAGAAGGAGCCA	2	Otop2_-_115307022.23-P1P2|Otop2_+_115307062.23-P1P2
Rnf157	P1P2	Rnf157_-_116413216.23-P1P2	GCGGCGGCAGCGACGGGCAA	1	Rnf157_-_116413209.23-P1P2	GTGGGGCTCGGCGGCAGCGA	2	Rnf157_-_116413216.23-P1P2|Rnf157_-_116413209.23-P1P2
Fbxw21	P1P2	Fbxw21_-_109162380.23-P1P2	GTGCTTATGTGACATCCATT	1	Fbxw21_+_109162393.23-P1P2	GAAACCAGATTGCCTACATC	2	Fbxw21_-_109162380.23-P1P2|Fbxw21_+_109162393.23-P1P2
Tbx4	P1	Tbx4_+_85886204.23-P1	GCAGACCCCAAGCCTCAATT	1	Tbx4_+_85886248.23-P1	GCCGGAGAGGGGGAATTCTA	2	Tbx4_+_85886204.23-P1|Tbx4_+_85886248.23-P1
Prkaa1	P1P2	Prkaa1_-_5143706.23-P1P2	GCCGCCGCCTAGCCCGCCAG	1	Prkaa1_+_5143696.23-P1P2	GCGCACTCGCTCCCCCTGGC	2	Prkaa1_-_5143706.23-P1P2|Prkaa1_+_5143696.23-P1P2
Apoa1	P1P2	Apoa1_+_46228527.23-P1P2	GGGCAAACAGGAAACTGCGG	1	Apoa1_+_46228547.23-P1P2	GGAGGCTGGGCAAACAGAGT	2	Apoa1_+_46228527.23-P1P2|Apoa1_+_46228547.23-P1P2
Pla2g3	P1P2	Pla2g3_-_3488109.23-P1P2	GGCTCCGCGGACACGATGAG	1	Pla2g3_+_3488091.23-P1P2	GCCTCCACTCATCGTGTCCG	2	Pla2g3_-_3488109.23-P1P2|Pla2g3_+_3488091.23-P1P2
Klhdc8b	P1P2	Klhdc8b_-_108452567.23-P1P2	GTCACCCAAAATGAACAGAC	1	Klhdc8b_-_108452628.23-P1P2	GTGGGGCGATGATAGAAATG	2	Klhdc8b_-_108452567.23-P1P2|Klhdc8b_-_108452628.23-P1P2
Onecut2	P1P2	Onecut2_+_64339859.23-P1P2	GGGGTCGAACGTTTCAGGTT	1	Onecut2_+_64339864.23-P1P2	GGGGCGGGGTCGAACGTTTC	2	Onecut2_+_64339859.23-P1P2|Onecut2_+_64339864.23-P1P2
Olfr1231	ENSMUST00000099786.1	Olfr1231_+_89303725.23-ENSMUST00000099786.1	GGGAGCAGCTACTGGGTTAA	1	Olfr1231_+_89303932.23-ENSMUST00000099786.1	GTATGAAAGGACACAGACTT	2	Olfr1231_+_89303725.23-ENSMUST00000099786.1|Olfr1231_+_89303932.23-ENSMUST00000099786.1
Faah	P1P2	Faah_+_116018168.23-P1P2	GGGGATGAGGAAAAAGACGT	1	Faah_+_116017846.23-P1P2	GACCGGGCCAGAAGGGGTCT	2	Faah_+_116018168.23-P1P2|Faah_+_116017846.23-P1P2
Psg28	P1P2	Psg28_-_18432349.23-P1P2	GCAAAGATGTCTGTGATGGT	1	Psg28_-_18432303.23-P1P2	GTGTACTCAGAGCTCTGGTA	2	Psg28_-_18432349.23-P1P2|Psg28_-_18432303.23-P1P2
Acyp1	P1P2	Acyp1_+_85280628.23-P1P2	GACAAGAGGGGTACACTTAG	1	Acyp1_-_85280532.23-P1P2	GCGCCCAAGGGTGGGGCTTC	2	Acyp1_+_85280628.23-P1P2|Acyp1_-_85280532.23-P1P2
Tmem59l	P1P2	Tmem59l_-_70487444.23-P1P2	GGGCAGGTGAATCTCTACTC	1	Tmem59l_-_70487521.23-P1P2	GCGTGCCGGGAATGACAAAG	2	Tmem59l_-_70487444.23-P1P2|Tmem59l_-_70487521.23-P1P2
9930111J21Rik2	P1P2	9930111J21Rik2_-_49051749.23-P1P2	Gttcaccgattaggcaaggg	1	9930111J21Rik2_-_49051768.23-P1P2	Gtggctgacaggtgagcttc	2	9930111J21Rik2_-_49051749.23-P1P2|9930111J21Rik2_-_49051768.23-P1P2
Lce1i	P1P2	Lce1i_+_92779136.23-P1P2	GCCCAATGGGAGTACTTTGT	1	Lce1i_+_92779179.23-P1P2	GTAAGAACCAGTAGAATTGG	2	Lce1i_+_92779136.23-P1P2|Lce1i_+_92779179.23-P1P2
Olfr311	ENSMUST00000071625.1	Olfr311_+_58840916.23-ENSMUST00000071625.1	GAGCCCAGGGAGCTTGGATA	1	Olfr311_+_58840930.23-ENSMUST00000071625.1	GGGGAGAATGAATTAAGCCC	2	Olfr311_+_58840916.23-ENSMUST00000071625.1|Olfr311_+_58840930.23-ENSMUST00000071625.1
Vmn1r225	ENSMUST00000061660.1	Vmn1r225_+_20501996.23-ENSMUST00000061660.1	GTCCCCACTTGGAGAACCAA	1	Vmn1r225_+_20502167.23-ENSMUST00000061660.1	GGCTCAAATTTGTAAAGTCA	2	Vmn1r225_+_20501996.23-ENSMUST00000061660.1|Vmn1r225_+_20502167.23-ENSMUST00000061660.1
1700020L24Rik	P1P2	1700020L24Rik_-_83437545.23-P1P2	GTTCCCTGGGGTAAGGTAGG	1	1700020L24Rik_-_83437533.23-P1P2	GCTCACTGAAATCTTCCCTG	2	1700020L24Rik_-_83437545.23-P1P2|1700020L24Rik_-_83437533.23-P1P2
Bdkrb1	ENSMUST00000041229.4	Bdkrb1_+_105603722.23-ENSMUST00000041229.4	GtacacaggcaaaacGGgtc	1	Bdkrb1_+_105603669.23-ENSMUST00000041229.4	Gcactcccacaggcagagat	2	Bdkrb1_+_105603722.23-ENSMUST00000041229.4|Bdkrb1_+_105603669.23-ENSMUST00000041229.4
Phf6	P1P2	Phf6_-_52912183.23-P1P2	GCGCGTGCGCCGTCCTTCGG	1	Phf6_-_52912106.23-P1P2	GCGGCAGAGCGGAGAATAGA	2	Phf6_-_52912183.23-P1P2|Phf6_-_52912106.23-P1P2
Hipk2	P1P2	Hipk2_-_38876354.23-P1P2	GCACGGATgcgaggcgggga	1	Hipk2_-_38876367.23-P1P2	Gcggggagggccgagccgaa	2	Hipk2_-_38876354.23-P1P2|Hipk2_-_38876367.23-P1P2
Trav7n-6	ENSMUST00000178100.1	Trav7n-6_-_53324161.23-ENSMUST00000178100.1	GGAAAAAATAAATTGCCCTT	1	Trav7n-6_+_53324154.23-ENSMUST00000178100.1	GTGCATACATTTTCACCAAA	2	Trav7n-6_-_53324161.23-ENSMUST00000178100.1|Trav7n-6_+_53324154.23-ENSMUST00000178100.1
Gm5936	ENSMUST00000114116.1	Gm5936_-_74836714.23-ENSMUST00000114116.1	GgtatgCACATGGTTGGTAG	1	Gm5936_-_74836708.23-ENSMUST00000114116.1	GgtgtgtgtatgCACATGGT	2	Gm5936_-_74836714.23-ENSMUST00000114116.1|Gm5936_-_74836708.23-ENSMUST00000114116.1
Ugt2b34	P1P2	Ugt2b34_-_86907074.23-P1P2	GGAGGGCAAATGCCAAAACC	1	Ugt2b34_+_86907436.23-P1P2	GGGGTAGAGATGGAGCTAAT	2	Ugt2b34_-_86907074.23-P1P2|Ugt2b34_+_86907436.23-P1P2
Net1	P1	Net1_-_3918325.23-P1	GTAGGAGCTCCAGTGACAAA	1	Net1_-_3918258.23-P1	GAGAGTGGGAAGCGGTTGCT	2	Net1_-_3918325.23-P1|Net1_-_3918258.23-P1
Tecrl	P1P2	Tecrl_+_83355088.23-P1P2	GGCATGCCACTTGACCTCCA	1	Tecrl_-_83355096.23-P1P2	GACTGCTGTGGACGCCCTGG	2	Tecrl_+_83355088.23-P1P2|Tecrl_-_83355096.23-P1P2
Fam69c	P1P2	Fam69c_-_84719814.23-P1P2	GTCACCCCGGGAAGTGGGGA	1	Fam69c_-_84719952.23-P1P2	GGGCGGCAGTCTAGGAACGA	2	Fam69c_-_84719814.23-P1P2|Fam69c_-_84719952.23-P1P2
Olfr281	ENSMUST00000109163.2	Olfr281_-_98456194.23-ENSMUST00000109163.2	GTCAACAGAGATACAGGTAA	1	Olfr281_-_98456060.23-ENSMUST00000109163.2	GAAGTGTCTGAGTAAGCGGA	2	Olfr281_-_98456194.23-ENSMUST00000109163.2|Olfr281_-_98456060.23-ENSMUST00000109163.2
Nudt5	P1P2	Nudt5_-_5844983.23-P1P2	GGAACCCTGCGCAGCACTTC	1	Nudt5_-_5845154.23-P1P2	GCACGAAAGCGTAGATTTTT	2	Nudt5_-_5844983.23-P1P2|Nudt5_-_5845154.23-P1P2
Arsk	P1P2	Arsk_-_76098775.23-P1P2	GCTCACTCAAGCGATGTCTG	1	Arsk_-_76098930.23-P1P2	GAGCATGAGCGTGATGTTAC	2	Arsk_-_76098775.23-P1P2|Arsk_-_76098930.23-P1P2
Krtap4-7	P1P2	Krtap4-7_+_99644261.23-P1P2	GCAATGAATCATAAGAATGT	1	Krtap4-7_+_99644558.23-P1P2	GGATCCCTAGGGGGAGAAGT	2	Krtap4-7_+_99644261.23-P1P2|Krtap4-7_+_99644558.23-P1P2
Zfp345	ENSMUST00000109914.1	Zfp345_+_150485300.23-ENSMUST00000109914.1	GGAGACCCGCAGGCTATTGG	1	Zfp345_+_150485310.23-ENSMUST00000109914.1	GTGTGGGAGGAGAGACCCGC	2	Zfp345_+_150485300.23-ENSMUST00000109914.1|Zfp345_+_150485310.23-ENSMUST00000109914.1
Mtch1	P1P2	Mtch1_-_29347848.23-P1P2	GGCCACGCCCCGAACGTCAA	1	Mtch1_+_29347972.23-P1P2	GGCCTGGTCCGCAAAGGGGC	2	Mtch1_-_29347848.23-P1P2|Mtch1_+_29347972.23-P1P2
Chst12	P1P2	Chst12_-_140505433.23-P1P2	GCAAAAGGGGCGGGACGCTC	1	Chst12_-_140505442.23-P1P2	GCGGGACGCTCAGGGATGGT	2	Chst12_-_140505433.23-P1P2|Chst12_-_140505442.23-P1P2
Bcl2l11	P1	Bcl2l11_+_128125870.23-P1	GGCAGGCTGCGACAGGTAGT	1	Bcl2l11_-_128125810.23-P1	GCCCGCAGGCCAAGACACTA	2	Bcl2l11_+_128125870.23-P1|Bcl2l11_-_128125810.23-P1
Otub2	P1P2	Otub2_+_103388494.23-P1P2	GAATCAGGAGAGTTGGTCAG	1	Otub2_-_103388598.23-P1P2	GCAAACGGGCCCCAAAACAC	2	Otub2_+_103388494.23-P1P2|Otub2_-_103388598.23-P1P2
Pam	ENSMUST00000097625.3	Pam_-_98095761.23-ENSMUST00000097625.3	GGGGTGCTTGGAGTCCCGGG	1	Pam_-_98095809.23-ENSMUST00000097625.3	GTCTCTGGGGAGCGTGGAGA	2	Pam_-_98095761.23-ENSMUST00000097625.3|Pam_-_98095809.23-ENSMUST00000097625.3
Lad1	P1P2	Lad1_+_135818838.23-P1P2	GCCGCCGCGCTCCCATTCGC	1	Lad1_+_135818728.23-P1P2	GGGACGGTCGCACCGAGCTG	2	Lad1_+_135818838.23-P1P2|Lad1_+_135818728.23-P1P2
Uqcrh	P1P2	Uqcrh_+_116075196.23-P1P2	GTGGGCAAGAAGTGACCGAA	1	Uqcrh_+_116075541.23-P1P2	GCGCCCGCACAGCTCGAACA	2	Uqcrh_+_116075196.23-P1P2|Uqcrh_+_116075541.23-P1P2
Rabep1	P1P2	Rabep1_+_70844846.23-P1P2	GGCCCAGGGAGGAACCGCTA	1	Rabep1_+_70844622.23-P1P2	GAGGCTGATGAGAGAGCTAT	2	Rabep1_+_70844846.23-P1P2|Rabep1_+_70844622.23-P1P2
Map2k3	P1P2	Map2k3_-_60931923.23-P1P2	GGGAAAGCTGGGTTGGATTC	1	Map2k3_-_60931903.23-P1P2	GGGAGCCGAGCTGTACTAAG	2	Map2k3_-_60931923.23-P1P2|Map2k3_-_60931903.23-P1P2
Clec1b	P1P2	Clec1b_+_129397298.23-P1P2	GAAGGGATGTTCCGTCCTGA	1	Clec1b_+_129397355.23-P1P2	GTGGTGAAAGAGTAGATGCG	2	Clec1b_+_129397298.23-P1P2|Clec1b_+_129397355.23-P1P2
Paics	P1P2	Paics_+_76951649.23-P1P2	GTACCGGGCTGGCTGTGCTT	1	Paics_+_76951660.23-P1P2	GCGAACCCGAAGTACCGGGC	2	Paics_+_76951649.23-P1P2|Paics_+_76951660.23-P1P2
Pigv	P1P2	Pigv_-_133672770.23-P1P2	GGCGGTGAGTCGCACCTTCC	1	Pigv_-_133672737.23-P1P2	GTTGACCCCAGCTAGGGCGG	2	Pigv_-_133672770.23-P1P2|Pigv_-_133672737.23-P1P2
Emc4	P1P2	Emc4_+_112368135.23-P1P2	GAGTGAGAGGTGTACTCGCA	1	Emc4_+_112368132.23-P1P2	GGAGAGGTGTACTCGCAGGG	2	Emc4_+_112368135.23-P1P2|Emc4_+_112368132.23-P1P2
Necap2	P1P2	Necap2_-_141078652.23-P1P2	GAATCCCAGAAGGTTCTCAG	1	Necap2_+_141078412.23-P1P2	GGGCACTCGGGAGCGATCGG	2	Necap2_-_141078652.23-P1P2|Necap2_+_141078412.23-P1P2
Tuba4a	P1P2	Tuba4a_-_75219328.23-P1P2	GCAGCCCGCCCACCATGGGG	1	Tuba4a_-_75219432.23-P1P2	GCCGGATTCTCTCACCTGTC	2	Tuba4a_-_75219328.23-P1P2|Tuba4a_-_75219432.23-P1P2
Tmem161a	P1P2	Tmem161a_+_70172375.23-P1P2	GGGGAAGCGCTGAGGTATCT	1	Tmem161a_+_70172306.23-P1P2	GATCGGGCTAAGAATGGGAT	2	Tmem161a_+_70172375.23-P1P2|Tmem161a_+_70172306.23-P1P2
Atp5g2	P1P2	Atp5g2_-_102671183.23-P1P2	GGCTCCCTCTGCCAGGTTGG	1	Atp5g2_-_102671148.23-P1P2	GTGGACACAAGCTAGAGGAT	2	Atp5g2_-_102671183.23-P1P2|Atp5g2_-_102671148.23-P1P2
Gm6812	ENSMUST00000074894.1	Gm6812_+_68893181.23-ENSMUST00000074894.1	GAGCCCACACTCCTCCTACA	1	Gm6812_-_68893227.23-ENSMUST00000074894.1	GTGGTCTAGTTAGAGAAGAG	2	Gm6812_+_68893181.23-ENSMUST00000074894.1|Gm6812_-_68893227.23-ENSMUST00000074894.1
Ints9	P1P2	Ints9_-_64950003.23-P1P2	GCATACGCCTTCCCACAGGG	1	Ints9_-_64950092.23-P1P2	GGAGGGACATGATATCATGC	2	Ints9_-_64950003.23-P1P2|Ints9_-_64950092.23-P1P2
Nlrp2	P1P2	Nlrp2_-_5351200.23-P1P2	GCTGTTCCTACTCACACCAG	1	Nlrp2_+_5351174.23-P1P2	GGGTGTGAGTAGGAACAGCA	2	Nlrp2_-_5351200.23-P1P2|Nlrp2_+_5351174.23-P1P2
1810011O10Rik	P1P2	1810011O10Rik_+_24439135.23-P1P2	GTGCCGTCTGAGGTGTAAAG	1	1810011O10Rik_+_24439145.23-P1P2	GTAAGGCACAATGCCGTCTG	2	1810011O10Rik_+_24439135.23-P1P2|1810011O10Rik_+_24439145.23-P1P2
Ciz1	P1P2	Ciz1_-_32363014.23-P1P2	GAGGCCTCCGCACCTCCAGA	1	Ciz1_+_32362999.23-P1P2	GAGAGCGCCCTCTGGAGGTG	2	Ciz1_-_32363014.23-P1P2|Ciz1_+_32362999.23-P1P2
Slc25a48	P1P2	Slc25a48_+_56438223.23-P1P2	GGGCGGGGCCCCAGTCTCTT	1	Slc25a48_+_56438210.23-P1P2	GTCTCTTAGGGGAATTCCTT	2	Slc25a48_+_56438223.23-P1P2|Slc25a48_+_56438210.23-P1P2
Lamc3	P1P2	Lamc3_-_31887146.23-P1P2	GAGAACAAGCAGGCACTCCC	1	Lamc3_+_31887060.23-P1P2	GCCTCCCTGCAAAATGGTCT	2	Lamc3_-_31887146.23-P1P2|Lamc3_+_31887060.23-P1P2
Klrg1	P1P2	Klrg1_-_122282860.23-P1P2	GGGGAATGTGGGCTGTAAGT	1	Klrg1_-_122282961.23-P1P2	GGGAAGTGATTCAGGTTCGA	2	Klrg1_-_122282860.23-P1P2|Klrg1_-_122282961.23-P1P2
Polr3k	P1P2	Polr3k_-_181864250.23-P1P2	GCACACGCGCAGAAACGACA	1	Polr3k_+_181864306.23-P1P2	GGCAGCCTCGCACACTCCAT	2	Polr3k_-_181864250.23-P1P2|Polr3k_+_181864306.23-P1P2
Arhgef5	P1P2	Arhgef5_-_43265386.23-P1P2	GAGACACGCAGGGGAGTCTA	1	Arhgef5_-_43265361.23-P1P2	GACCTGACGAGGACCCACGG	2	Arhgef5_-_43265386.23-P1P2|Arhgef5_-_43265361.23-P1P2
Prickle2	P1	Prickle2_+_92706301.23-P1	GGCGGGGAGCGAGCTGCAGA	1	Prickle2_+_92706377.23-P1	GGCCTCAGCTGGTGCCAGAG	2	Prickle2_+_92706301.23-P1|Prickle2_+_92706377.23-P1
Tra2b	P1P2	Tra2b_-_22266121.23-P1P2	GTACCCGGCCACAGCGTGGC	1	Tra2b_+_22266054.23-P1P2	GGTAAGGTAGACGTCACGTC	2	Tra2b_-_22266121.23-P1P2|Tra2b_+_22266054.23-P1P2
Olfr362	ENSMUST00000100144.1	Olfr362_+_37105885.23-ENSMUST00000100144.1	GGGAGCCTATAAAGACTTAT	1	Olfr362_+_37105869.23-ENSMUST00000100144.1	GTATAGGTATATAAATTAGA	2	Olfr362_+_37105885.23-ENSMUST00000100144.1|Olfr362_+_37105869.23-ENSMUST00000100144.1
Pi4k2a	P1P2	Pi4k2a_-_42090208.23-P1P2	GGGAAGCTGGGGCGGGCTAA	1	Pi4k2a_-_42090314.23-P1P2	GCGTAGGCGCAGGTTCTGAT	2	Pi4k2a_-_42090208.23-P1P2|Pi4k2a_-_42090314.23-P1P2
Tas2r126	ENSMUST00000059534.4	Tas2r126_+_42434315.23-ENSMUST00000059534.4	GTCCCGGGCTCGGGTACCAT	1	Tas2r126_-_42434473.23-ENSMUST00000059534.4	GAGGGAGTGTCAGGGACTGT	2	Tas2r126_+_42434315.23-ENSMUST00000059534.4|Tas2r126_-_42434473.23-ENSMUST00000059534.4
Vmn1r43	ENSMUST00000089418.2	Vmn1r43_+_89871032.23-ENSMUST00000089418.2	GCCAACCTGACACAGGTACA	1	Vmn1r43_-_89870618.23-ENSMUST00000089418.2	GCCATGGATCCTGTCTTCTA	2	Vmn1r43_+_89871032.23-ENSMUST00000089418.2|Vmn1r43_-_89870618.23-ENSMUST00000089418.2
Bmi1	P1P2	Bmi1_-_18677072.23-P1P2	GACAATGGGGAGGTTGGCGA	1	Bmi1_-_18676738.23-P1P2	Ggcggcgcgctgcgagggga	2	Bmi1_-_18677072.23-P1P2|Bmi1_-_18676738.23-P1P2
Exoc3l2	P1P2	Exoc3l2_-_19488864.23-P1P2	GAGGGCCTTTGTATTCCTTT	1	Exoc3l2_-_19488976.23-P1P2	GcaTCAAAAGGGATAGGTGG	2	Exoc3l2_-_19488864.23-P1P2|Exoc3l2_-_19488976.23-P1P2
Ficd	P1P2	Ficd_+_113735571.23-P1P2	GGGGTCGAGGCCACCGGCTA	1	Ficd_-_113735653.23-P1P2	GACGGCGCGCCTTTCCCGGG	2	Ficd_+_113735571.23-P1P2|Ficd_-_113735653.23-P1P2
Agr3	P1P2	Agr3_-_35925575.23-P1P2	GGGAATGAAACCAAGTTCTT	1	Agr3_+_35925359.23-P1P2	GGGGGAAAAGTCAGGGGCAA	2	Agr3_-_35925575.23-P1P2|Agr3_+_35925359.23-P1P2
Tfe3	P1P2	Tfe3_+_7762670.23-P1P2	GTGGGCTGGGGAAACTCCAC	1	Tfe3_-_7762701.23-P1P2	GTTCCCCAGCCCAAGGAGGA	2	Tfe3_+_7762670.23-P1P2|Tfe3_-_7762701.23-P1P2
Gck	ENSMUST00000102920.3	Gck_+_5950203.23-ENSMUST00000102920.3	GACCAAGCTGGCAGTCACTG	1	Gck_-_5950102.23-ENSMUST00000102920.3	GGGAGGGCCTGTGGTTTCTA	2	Gck_+_5950203.23-ENSMUST00000102920.3|Gck_-_5950102.23-ENSMUST00000102920.3
Zfp473	P1P2	Zfp473_-_44748926.23-P1P2	GTCCACGGGTACCTCGTCAC	1	Zfp473_+_44749002.23-P1P2	GCAGCACAGCAGAGTACCAA	2	Zfp473_-_44748926.23-P1P2|Zfp473_+_44749002.23-P1P2
D630023F18Rik	P1P2	D630023F18Rik_+_65123330.23-P1P2	GCAGATGGGCACAAGGTTCA	1	D630023F18Rik_-_65123482.23-P1P2	Gtcgaaggacaagtgtcaga	2	D630023F18Rik_+_65123330.23-P1P2|D630023F18Rik_-_65123482.23-P1P2
Mapk13	P1P2	Mapk13_+_28769195.23-P1P2	GcATCACCGGCGAACGCCCC	1	Mapk13_-_28769273.23-P1P2	Gccggggcgggaacgtacct	2	Mapk13_+_28769195.23-P1P2|Mapk13_-_28769273.23-P1P2
Cdh3	P1P2	Cdh3_+_106510783.23-P1P2	GCCCCTCGCAGGTGGGGTCG	1	Cdh3_-_106510734.23-P1P2	GAGAGCAGGGAGGCCGGTGG	2	Cdh3_+_106510783.23-P1P2|Cdh3_-_106510734.23-P1P2
Ackr2	P1P2	Ackr2_-_121898165.23-P1P2	GAGGGGGCCTAGACAGACAA	1	Ackr2_-_121898199.23-P1P2	GAGAGTGCAGAAGATCAGCT	2	Ackr2_-_121898165.23-P1P2|Ackr2_-_121898199.23-P1P2
Ccr1l1	ENSMUST00000071404.3	Ccr1l1_+_123978589.23-ENSMUST00000071404.3	GTGGTTTAATGTGGGTAGAA	1	Ccr1l1_+_123978745.23-ENSMUST00000071404.3	GCAGCTAAAGCCCTGGAAGG	2	Ccr1l1_+_123978589.23-ENSMUST00000071404.3|Ccr1l1_+_123978745.23-ENSMUST00000071404.3
Kcnc3	ENSMUST00000107906.3	Kcnc3_+_44590741.23-ENSMUST00000107906.3	GGGGAGGGCACGAGCTGATT	1	Kcnc3_+_44590811.23-ENSMUST00000107906.3	GGTAGAGAGGCAGACGTGAT	2	Kcnc3_+_44590741.23-ENSMUST00000107906.3|Kcnc3_+_44590811.23-ENSMUST00000107906.3
Mroh3	ENSMUST00000166708.1	Mroh3_-_136199780.23-ENSMUST00000166708.1	GACTCGAGGGAGGTGAGGGG	1	Mroh3_-_136199777.23-ENSMUST00000166708.1	GAGCACTCGAGGGAGGTGAG	2	Mroh3_-_136199780.23-ENSMUST00000166708.1|Mroh3_-_136199777.23-ENSMUST00000166708.1
Olfr547	ENSMUST00000098229.1	Olfr547_-_102534522.23-ENSMUST00000098229.1	GTCACTGTGTGCATTAACTG	1	Olfr547_-_102534588.23-ENSMUST00000098229.1	GCTATGTGGATGTCACTCAT	2	Olfr547_-_102534522.23-ENSMUST00000098229.1|Olfr547_-_102534588.23-ENSMUST00000098229.1
Pfdn2	P1P2	Pfdn2_-_171345553.23-P1P2	GCACCGCAGCGGGCAGGGTT	1	Pfdn2_+_171345442.23-P1P2	GCGCGCTAATCAGAGGGCGG	2	Pfdn2_-_171345553.23-P1P2|Pfdn2_+_171345442.23-P1P2
Ivl	P1P2	Ivl_+_92573891.23-P1P2	GTCCAACAGCAGCTAGAAAA	1	Ivl_-_92573921.23-P1P2	GAGCTGCTGTTGGAACATGT	2	Ivl_+_92573891.23-P1P2|Ivl_-_92573921.23-P1P2
Fam150a	P1P2	Fam150a_-_6359166.23-P1P2	GAAGCTGCGTGAGCTCCGGA	1	Fam150a_-_6359050.23-P1P2	GACCCAGAGACCCACAATTA	2	Fam150a_-_6359166.23-P1P2|Fam150a_-_6359050.23-P1P2
Pygo1	P1P2	Pygo1_-_72925483.23-P1P2	GGGGCTGTGGAGCACAGGCA	1	Pygo1_-_72925327.23-P1P2	GAGGGCGCGAGGTGAGTGCA	2	Pygo1_-_72925483.23-P1P2|Pygo1_-_72925327.23-P1P2
Olfr873	ENSMUST00000053919.4	Olfr873_-_20299778.23-ENSMUST00000053919.4	Gccacattacccatgatcta	1	Olfr873_-_20300010.23-ENSMUST00000053919.4	GAACTGAGATggggattgat	2	Olfr873_-_20299778.23-ENSMUST00000053919.4|Olfr873_-_20300010.23-ENSMUST00000053919.4
Amdhd1	P1P2	Amdhd1_-_93540130.23-P1P2	GAGAGCGCCTGGAATAAAGT	1	Amdhd1_+_93540173.23-P1P2	GACCTCCTTTACTCCAAACC	2	Amdhd1_-_93540130.23-P1P2|Amdhd1_+_93540173.23-P1P2
Cux1	P1P2	Cux1_+_136567449.23-P1P2	GccgccgccgcGTTTCCCTC	1	Cux1_-_136567439.23-P1P2	GgccgccaccgccTCAGCCA	2	Cux1_+_136567449.23-P1P2|Cux1_-_136567439.23-P1P2
Eif2ak1	P1P2	Eif2ak1_+_143817658.23-P1P2	GGAGTGGGCAGGACAAGCAG	1	Eif2ak1_+_143817645.23-P1P2	GAAGCAGGGGTGTGCTGGCG	2	Eif2ak1_+_143817658.23-P1P2|Eif2ak1_+_143817645.23-P1P2
Tac2	P1P2	Tac2_-_127725302.23-P1P2	GCCTCCAGCCACCCTGGGAT	1	Tac2_-_127725174.23-P1P2	GACAACCTCAGCTTACTGCT	2	Tac2_-_127725302.23-P1P2|Tac2_-_127725174.23-P1P2
C1galt1c1	P1P2	C1galt1c1_+_38635247.23-P1P2	GCCCCTCGGGGCATCCCATT	1	C1galt1c1_+_38635302.23-P1P2	GCACGCCCGTAGGCAGACCG	2	C1galt1c1_+_38635247.23-P1P2|C1galt1c1_+_38635302.23-P1P2
Serpinb9c	P2	Serpinb9c_+_33158545.23-P2	GCCAAGCTGTGCATTCAATC	1	Serpinb9c_-_33158587.23-P2	GGCCCAGACTGTGACTGCTC	2	Serpinb9c_+_33158545.23-P2|Serpinb9c_-_33158587.23-P2
Sik3	P1P2	Sik3_-_46012666.23-P1P2	GAGCTCGCCCGGTGAGGTCA	1	Sik3_-_46012625.23-P1P2	GGAGCCGGCGCCTCAGGAAC	2	Sik3_-_46012666.23-P1P2|Sik3_-_46012625.23-P1P2
Arhgef28	P1P2	Arhgef28_+_98206348.23-P1P2	GCGGGCGCGGCCATGTGATG	1	Arhgef28_+_98206300.23-P1P2	GTGGGCAGGCGGGGACCAGG	2	Arhgef28_+_98206348.23-P1P2|Arhgef28_+_98206300.23-P1P2
2310009B15Rik	P1P2	2310009B15Rik_-_138856884.23-P1P2	Ggggaggcggggtcggtcta	1	2310009B15Rik_-_138856962.23-P1P2	GTCTTCAGCTCCCTCCATCT	2	2310009B15Rik_-_138856884.23-P1P2|2310009B15Rik_-_138856962.23-P1P2
Dact3	P1P2	Dact3_-_16875216.23-P1P2	GCGGAGCCCTGCGTCACGGA	1	Dact3_-_16875164.23-P1P2	GTACCCCCGTAGGTAGTCCT	2	Dact3_-_16875216.23-P1P2|Dact3_-_16875164.23-P1P2
Tppp	P1P2	Tppp_+_74009250.23-P1P2	GACCCAGGGTGCGGTCGCTG	1	Tppp_-_74009288.23-P1P2	GTGGGTCGAGCGGCGTCCAT	2	Tppp_+_74009250.23-P1P2|Tppp_-_74009288.23-P1P2
Npffr1	P1P2	Npffr1_-_61595157.23-P1P2	GGCACCGCCCGCACTTTGGA	1	Npffr1_+_61595118.23-P1P2	GGTGCCCGCCGCAGCCCTGG	2	Npffr1_-_61595157.23-P1P2|Npffr1_+_61595118.23-P1P2
Vmn1r188	ENSMUST00000091739.1	Vmn1r188_-_22087745.23-ENSMUST00000091739.1	GCCCTGGAAAGGAAGTGTCA	1	Vmn1r188_+_22087725.23-ENSMUST00000091739.1	GTCCCTGACACTTCCTTTCC	2	Vmn1r188_-_22087745.23-ENSMUST00000091739.1|Vmn1r188_+_22087725.23-ENSMUST00000091739.1
Nudc	P1P2	Nudc_+_133546087.23-P1P2	GTAGCCAATGGCCAGAGAAG	1	Nudc_+_133546053.23-P1P2	GGAGCTCAATGGGCACCGAT	2	Nudc_+_133546087.23-P1P2|Nudc_+_133546053.23-P1P2
Rhou	P1P2	Rhou_+_123653701.23-P1P2	GCCGGCGCCTCGAAACGGTG	1	Rhou_+_123653719.23-P1P2	GCCGCGCTGGTGAACTACGC	2	Rhou_+_123653701.23-P1P2|Rhou_+_123653719.23-P1P2
Gpr45	P1P2	Gpr45_-_42952984.23-P1P2	GGTACCCTGGTCCCTAGGGG	1	Gpr45_-_42953020.23-P1P2	GGGGTGGCGGCCCCCGAGGA	2	Gpr45_-_42952984.23-P1P2|Gpr45_-_42953020.23-P1P2
Olfr20	ENSMUST00000120137.1	Olfr20_-_73350649.23-ENSMUST00000120137.1	GGAGCTACTTGCTATCCCCA	1	Olfr20_-_73350720.23-ENSMUST00000120137.1	GACTACTGCTACAGGACTCC	2	Olfr20_-_73350649.23-ENSMUST00000120137.1|Olfr20_-_73350720.23-ENSMUST00000120137.1
Vps26a	P1P2	Vps26a_+_62486846.23-P1P2	GTCGAAACGGCCTTCCTGAA	1	Vps26a_+_62486859.23-P1P2	GGAGGAGCCCCGCCTCGAAA	2	Vps26a_+_62486846.23-P1P2|Vps26a_+_62486859.23-P1P2
Cml3	ENSMUST00000050780.7	Cml3_+_85765768.23-ENSMUST00000050780.7	GCTCCCTCCCTCAGCCAGAA	1	Cml3_-_85766093.23-ENSMUST00000050780.7	GGTGTGCGTCATCACAAGTG	2	Cml3_+_85765768.23-ENSMUST00000050780.7|Cml3_-_85766093.23-ENSMUST00000050780.7
Lin54	P2	Lin54_-_100498765.23-P2	GGGGGGAGGGAGAGGTTCTA	1	Lin54_-_100498752.23-P2	GCAAACGCACTCAGGGGGGA	2	Lin54_-_100498765.23-P2|Lin54_-_100498752.23-P2
Cd53	P1P2	Cd53_-_106790165.23-P1P2	GAGACTGAGTGTTCTCTCTT	1	Cd53_-_106790138.23-P1P2	GAACCCAAGCGAGAAGAGTG	2	Cd53_-_106790165.23-P1P2|Cd53_-_106790138.23-P1P2
Spast	P1P2	Spast_+_74338555.23-P1P2	GTCGGCTTGCGATGGTCCCA	1	Spast_-_74338668.23-P1P2	GCACATGCGCACAAGCTCCC	2	Spast_+_74338555.23-P1P2|Spast_-_74338668.23-P1P2
Sytl2	ENSMUST00000107211.1,ENSMUST00000107210.1	Sytl2_+_90348580.23-ENSMUST00000107211.1,ENSMUST00000107210.1	GAGGTCCCTCAAGGTAGCAG	1	Sytl2_+_90348553.23-ENSMUST00000107211.1,ENSMUST00000107210.1	GAGGATGAACAGGTCTCAGG	2	Sytl2_+_90348580.23-ENSMUST00000107211.1,ENSMUST00000107210.1|Sytl2_+_90348553.23-ENSMUST00000107211.1,ENSMUST00000107210.1
Hes5	P1P2	Hes5_+_154960830.23-P1P2	GcggccgTTCCCACACTCGG	1	Hes5_+_154960705.23-P1P2	GGCCGCGCGGCACAATGTCC	2	Hes5_+_154960830.23-P1P2|Hes5_+_154960705.23-P1P2
Actl9	P1P2	Actl9_-_33432741.23-P1P2	GtagacttgggtagaatcTC	1	Actl9_-_33432729.23-P1P2	Gatctgcccaagctagactt	2	Actl9_-_33432741.23-P1P2|Actl9_-_33432729.23-P1P2
Slc39a3	P1P2	Slc39a3_-_81037567.23-P1P2	GGGTACTGAATGAGTGTGGC	1	Slc39a3_+_81037524.23-P1P2	GACGCGACCCTGGACAGCTC	2	Slc39a3_-_81037567.23-P1P2|Slc39a3_+_81037524.23-P1P2
Prkab1	P1P2	Prkab1_+_116024540.23-P1P2	GAGCAGGGAAGAGGCGGAAA	1	Prkab1_-_116024594.23-P1P2	GAGCGGTCGCGGGTGGTTCG	2	Prkab1_+_116024540.23-P1P2|Prkab1_-_116024594.23-P1P2
9430016H08Rik	P1P2	9430016H08Rik_-_57406621.23-P1P2	GAGCCCGAGGGCTTCGGCCT	1	9430016H08Rik_-_57406609.23-P1P2	GCGCACGGCGGGGAGCCCGA	2	9430016H08Rik_-_57406621.23-P1P2|9430016H08Rik_-_57406609.23-P1P2
[truncated: 20,037 more rows]

## Sheet: 3_4
gene	transcript	sgID_A	protospacer_A	rank_A	sgID_B	protospacer_B	rank_B	sgID_AB
Dapl1	P1P2	Dapl1_-_59484378.23-P1P2	GGACACCCCTGGACGTGACA	3	Dapl1_-_59484367.23-P1P2	GTTGTCCATTGTGACACCCC	4	Dapl1_-_59484378.23-P1P2|Dapl1_-_59484367.23-P1P2
E2f8	P1P2	E2f8_-_48881173.23-P1P2	GTGGCTAGAGGTCCCCAAGG	3	E2f8_-_48881252.23-P1P2	GGCACCGCCCCCGAGTGCGC	4	E2f8_-_48881173.23-P1P2|E2f8_-_48881252.23-P1P2
Rhoc	P1P2	Rhoc_+_104788898.23-P1P2	GGGGCGGCCGCAGGTCACCC	3	Rhoc_+_104788879.23-P1P2	GCGGCTGAGGACCCGGCAAG	4	Rhoc_+_104788898.23-P1P2|Rhoc_+_104788879.23-P1P2
Plscr3	P1P2	Plscr3_-_69846480.23-P1P2	GCAAGCCTCTGCAGTCGGAG	3	Plscr3_+_69846549.23-P1P2	GGGGCGACTGCGCAGAAAGC	4	Plscr3_-_69846480.23-P1P2|Plscr3_+_69846549.23-P1P2
Cmtm6	P1P2	Cmtm6_-_114731050.23-P1P2	GGAGGGGTGTGGCGAACAAG	3	Cmtm6_-_114731140.23-P1P2	GGCGTGACGAGGCGTGAGGA	4	Cmtm6_-_114731050.23-P1P2|Cmtm6_-_114731140.23-P1P2
Cdsn	P1P2	Cdsn_+_35551993.23-P1P2	GGAAGAGGTGACTGCGGTGC	3	Cdsn_-_35551767.23-P1P2	GCAGGCAGGGTGCTTCTCAG	4	Cdsn_+_35551993.23-P1P2|Cdsn_-_35551767.23-P1P2
Zfp1	P1P2	Zfp1_+_111643428.23-P1P2	GAGCTGTGACGCTGAGGTGT	3	Zfp1_+_111643357.23-P1P2	GAACGTACGCATTATTAGTT	4	Zfp1_+_111643428.23-P1P2|Zfp1_+_111643357.23-P1P2
Olfr988	ENSMUST00000099928.2	Olfr988_+_85354475.23-ENSMUST00000099928.2	Gtctaagttccttgaaaaac	3	Olfr988_-_85354295.23-ENSMUST00000099928.2	GGTGTTCTCAGGGACAAACA	4	Olfr988_+_85354475.23-ENSMUST00000099928.2|Olfr988_-_85354295.23-ENSMUST00000099928.2
Cst10	P1P2	Cst10_-_149405134.23-P1P2	GGAACTAAGTGCTAATGGAA	3	Cst10_-_149405245.23-P1P2	GACAAGGAGGATCTAGGGGT	4	Cst10_-_149405134.23-P1P2|Cst10_-_149405245.23-P1P2
Rbm24	P1P2	Rbm24_+_46418192.23-P1P2	GACCCCTGGCGATTCCCGCA	3	Rbm24_-_46418212.23-P1P2	GTCCCTGCGGGAATCGCCAG	4	Rbm24_+_46418192.23-P1P2|Rbm24_-_46418212.23-P1P2
Scd4	P1P2	Scd4_-_44333136.23-P1P2	GCCTTGCCTTAGGTGAATGT	3	Scd4_+_44333120.23-P1P2	GCAAAGCCCACATTCACCTA	4	Scd4_-_44333136.23-P1P2|Scd4_+_44333120.23-P1P2
Gnai2	P1P2	Gnai2_+_107635415.23-P1P2	GCCCGCCCCGGCCCAGTCGC	3	Gnai2_-_107635448.23-P1P2	GCCGGGGCGGGTCTGGAGGA	4	Gnai2_+_107635415.23-P1P2|Gnai2_-_107635448.23-P1P2
Pla2g2c	P1P2	Pla2g2c_+_138725061.23-P1P2	GGCAGCTAAGGGAATCTCCT	3	Pla2g2c_+_138725161.23-P1P2	GGAGGTGAGAGGCCCGCTGT	4	Pla2g2c_+_138725061.23-P1P2|Pla2g2c_+_138725161.23-P1P2
2010111I01Rik	ENSMUST00000021911.8	2010111I01Rik_-_63014981.23-ENSMUST00000021911.8	GGCAACTGCAGGGACATTTA	3	2010111I01Rik_+_63015086.23-ENSMUST00000021911.8	GAGTAGCTCAGAATCACAAA	4	2010111I01Rik_-_63014981.23-ENSMUST00000021911.8|2010111I01Rik_+_63015086.23-ENSMUST00000021911.8
Atat1	P1P2	Atat1_-_35910125.23-P1P2	GTCTCTAGGACCCGCCCCGA	3	Atat1_+_35910322.23-P1P2	GGGTGTGAAGTCTATGAGGT	4	Atat1_-_35910125.23-P1P2|Atat1_+_35910322.23-P1P2
Sprr4	ENSMUST00000062129.1	Sprr4_-_92500813.23-ENSMUST00000062129.1	GCGTCTGGGTAACTGCCAGT	3	Sprr4_-_92500847.23-ENSMUST00000062129.1	GATGCAGATGTATGAGGAAG	4	Sprr4_-_92500813.23-ENSMUST00000062129.1|Sprr4_-_92500847.23-ENSMUST00000062129.1
Rab6a	P1P2	Rab6a_+_100607362.23-P1P2	GACGCAAGGCGATTGGAGGA	3	Rab6a_+_100607426.23-P1P2	GCGCGCGCGCGACTCTCGCG	4	Rab6a_+_100607362.23-P1P2|Rab6a_+_100607426.23-P1P2
Il23r	P1P2	Il23r_+_67492040.23-P1P2	GAAGACTCTGTTTTCAATTA	3	Il23r_-_67492090.23-P1P2	GAAGTCAaacaggtcaatgg	4	Il23r_+_67492040.23-P1P2|Il23r_-_67492090.23-P1P2
Sprr2a3	ENSMUST00000090872.4	Sprr2a3_-_92288395.23-ENSMUST00000090872.4	GGGCATGAGATTTTCAAAAC	3	Sprr2a3_-_92288444.23-ENSMUST00000090872.4	GTAAGTAAAAGAGGCAATCC	4	Sprr2a3_-_92288395.23-ENSMUST00000090872.4|Sprr2a3_-_92288444.23-ENSMUST00000090872.4
Cdk2ap1	P1	Cdk2ap1_-_124354954.23-P1	GGGAGAAAATGGTGGCGATT	3	Cdk2ap1_-_124354934.23-P1	GGCAGGGATGGAAAATTACC	4	Cdk2ap1_-_124354954.23-P1|Cdk2ap1_-_124354934.23-P1
Elavl4	P1P2	Elavl4_-_110287008.23-P1P2	GCCCACCCTCGGCTTTTATG	3	Elavl4_+_110286620.23-P1P2	GAGGCGGCTTGTATGTGTAG	4	Elavl4_-_110287008.23-P1P2|Elavl4_+_110286620.23-P1P2
Xrn2	P1P2	Xrn2_-_147012872.23-P1P2	GGCCAGGAGTCGGCTCTCAA	3	Xrn2_+_147012895.23-P1P2	GGCTGGGCGAGCTGTAGACC	4	Xrn2_-_147012872.23-P1P2|Xrn2_+_147012895.23-P1P2
Casc1	P1P2	Casc1_+_145211140.23-P1P2	GACCGTCTGCCGGAAGTGGG	3	Casc1_+_145210890.23-P1P2	GAACACTGGGAGTTGTGAGT	4	Casc1_+_145211140.23-P1P2|Casc1_+_145210890.23-P1P2
Dcaf15	P1P2	Dcaf15_+_84104966.23-P1P2	GCGCCAAAGTGGTTTCTGAG	3	Dcaf15_+_84104816.23-P1P2	GCGGCCGCAGTAAGGAGAAA	4	Dcaf15_+_84104966.23-P1P2|Dcaf15_+_84104816.23-P1P2
Pip5k1a	P1P2	Pip5k1a_-_95107038.23-P1P2	GTGGCTCAGTAGGCCAATAT	3	Pip5k1a_+_95106989.23-P1P2	GACTCACGGTCTACGGTCGG	4	Pip5k1a_-_95107038.23-P1P2|Pip5k1a_+_95106989.23-P1P2
Rac2	P1P2	Rac2_-_78572862.23-P1P2	GAGAGGACCTGGGGCCCCAC	3	Rac2_-_78572820.23-P1P2	GTGCTGCCCCACAGCCTTGA	4	Rac2_-_78572862.23-P1P2|Rac2_-_78572820.23-P1P2
Dbx2	P1P2	Dbx2_-_95654835.23-P1P2	GAGAGTCTGGGCTCCAGCGA	3	Dbx2_-_95655002.23-P1P2	GCTGAAGCGTGGTTGTCATC	4	Dbx2_-_95654835.23-P1P2|Dbx2_-_95655002.23-P1P2
Ndufv3	P1P2	Ndufv3_+_31520070.23-P1P2	GTTGCGCGCGCATTCTGGGA	3	Ndufv3_+_31520000.23-P1P2	GAAAGCGTGGGGTCCTCCCC	4	Ndufv3_+_31520070.23-P1P2|Ndufv3_+_31520000.23-P1P2
Olfr1299	ENSMUST00000099610.2	Olfr1299_+_111663964.23-ENSMUST00000099610.2	GAGAAATATGCTCTATATGA	3	Olfr1299_+_111663948.23-ENSMUST00000099610.2	GTGATGGTATGCAAAAACAT	4	Olfr1299_+_111663964.23-ENSMUST00000099610.2|Olfr1299_+_111663948.23-ENSMUST00000099610.2
Obox3	ENSMUST00000173912.1	Obox3_+_15640086.23-ENSMUST00000173912.1	Gaggaaagacccagggtgtg	3	Obox3_+_15640069.23-ENSMUST00000173912.1	Gtggggaggcctggtttaga	4	Obox3_+_15640086.23-ENSMUST00000173912.1|Obox3_+_15640069.23-ENSMUST00000173912.1
Lhfpl1	P1P2	Lhfpl1_-_145348980.23-P1P2	GGGGAGGAGTCCAGCTTAAT	3	Lhfpl1_-_145349105.23-P1P2	GCCCACATCCCAGCTGCCAA	4	Lhfpl1_-_145348980.23-P1P2|Lhfpl1_-_145349105.23-P1P2
Rcsd1	P1P2	Rcsd1_+_165708253.23-P1P2	GGGGCAGATTAATGGAGTCG	3	Rcsd1_-_165708145.23-P1P2	Gccgagggacgcaggaggag	4	Rcsd1_+_165708253.23-P1P2|Rcsd1_-_165708145.23-P1P2
Ip6k3	P1P2	Ip6k3_-_27167924.23-P1P2	Ggagagaggaaagacgagga	3	Ip6k3_-_27167958.23-P1P2	Gaggaagaaggggaaaattt	4	Ip6k3_-_27167924.23-P1P2|Ip6k3_-_27167958.23-P1P2
Serac1	P1P2	Serac1_-_6079915.23-P1P2	GTGCGCGCCTAGAAAAAGGT	3	Serac1_-_6079832.23-P1P2	GGCGCGATGACGTACGGCGC	4	Serac1_-_6079915.23-P1P2|Serac1_-_6079832.23-P1P2
Col1a1	P2	Col1a1_-_94937464.23-P2	GCTGCCCCGGGAAAGGAGGT	3	Col1a1_+_94937424.23-P2	GCAGGTGGGGCGGAATGGGC	4	Col1a1_-_94937464.23-P2|Col1a1_+_94937424.23-P2
Akap10	P1P2	Akap10_+_61930275.23-P1P2	GcccgcgggAGGAGGTGCGC	3	Akap10_+_61930358.23-P1P2	GCTGTCATCCGAAGCCTCCA	4	Akap10_+_61930275.23-P1P2|Akap10_+_61930358.23-P1P2
Slc7a11	P1P2	Slc7a11_+_50443680.23-P1P2	GAAGCTGGAGTTTTCTCATG	3	Slc7a11_+_50443565.23-P1P2	GTGAGCTGGTGTGTAATGAT	4	Slc7a11_+_50443680.23-P1P2|Slc7a11_+_50443565.23-P1P2
Unc13a	P1P2	Unc13a_-_71671829.23-P1P2	GGCCGGGCAGACGCCTTAAA	3	Unc13a_-_71671779.23-P1P2	GCGCTCTGACGCTGCGGCGT	4	Unc13a_-_71671829.23-P1P2|Unc13a_-_71671779.23-P1P2
Olfr616	ENSMUST00000106886.1	Olfr616_+_103565427.23-ENSMUST00000106886.1	GTGCACATAGTTATTCAGAT	3	Olfr616_-_103565742.23-ENSMUST00000106886.1	Gggagtgaataggttagttg	4	Olfr616_+_103565427.23-ENSMUST00000106886.1|Olfr616_-_103565742.23-ENSMUST00000106886.1
Faf2	P1P2	Faf2_-_54621700.23-P1P2	GTGGTGGCGAGATTCGGAAG	3	Faf2_-_54621589.23-P1P2	GGAGGTACACTGACCCTCTG	4	Faf2_-_54621700.23-P1P2|Faf2_-_54621589.23-P1P2
Vamp8	P1P2	Vamp8_-_72390610.23-P1P2	GCCCGCGACTCCAGCCACTC	3	Vamp8_+_72390657.23-P1P2	GACTAGGAGGACGGCAGCAG	4	Vamp8_-_72390610.23-P1P2|Vamp8_+_72390657.23-P1P2
Ms4a13	P1P2	Ms4a13_-_11196809.23-P1P2	GGGGCCTGCGGGCCACGCCC	3	Ms4a13_-_11196884.23-P1P2	GGCTGGAACACTGCCTCTTC	4	Ms4a13_-_11196809.23-P1P2|Ms4a13_-_11196884.23-P1P2
Gm4884	ENSMUST00000164422.1	Gm4884_+_41032331.23-ENSMUST00000164422.1	GAGGAAGGAGAGGGTTACCG	3	Gm4884_+_41032170.23-ENSMUST00000164422.1	GATTGTGAATCCCAAGACTG	4	Gm4884_+_41032331.23-ENSMUST00000164422.1|Gm4884_+_41032170.23-ENSMUST00000164422.1
Cryba4	P1	Cryba4_-_112252641.23-P1	GTCCTGGCCAAGGCCCAGAG	3	Cryba4_+_112252768.23-P1	GCCACCATCAAGATGATGTT	4	Cryba4_-_112252641.23-P1|Cryba4_+_112252768.23-P1
Clp1	P1P2	Clp1_-_84727483.23-P1P2	GAAGACGACCGGAGGCGGAG	3	Clp1_-_84727478.23-P1P2	GGTGGGAAGACGACCGGAGG	4	Clp1_-_84727483.23-P1P2|Clp1_-_84727478.23-P1P2
Pde5a	P1P2	Pde5a_-_122729964.23-P1P2	GGCCGCAAGGAGGATTTTCG	3	Pde5a_+_122729818.23-P1P2	GGGCCTGGTCCAGACCCCCC	4	Pde5a_-_122729964.23-P1P2|Pde5a_+_122729818.23-P1P2
Trub1	P1P2	Trub1_+_57452766.23-P1P2	GTAGTCGTGAAGAGGTACAT	3	Trub1_+_57452855.23-P1P2	GTAGTCCATAGGCTCGGTAT	4	Trub1_+_57452766.23-P1P2|Trub1_+_57452855.23-P1P2
Cst8	P1P2	Cst8_+_148798649.23-P1P2	GGGCAAGCACCTTCCAACTG	3	Cst8_-_148798568.23-P1P2	GGATCTGGTAGAAGAGTAGA	4	Cst8_+_148798649.23-P1P2|Cst8_-_148798568.23-P1P2
Gal3st3	P1P2	Gal3st3_-_5298290.23-P1P2	GcccgcccccggTGTGAGAT	3	Gal3st3_+_5298072.23-P1P2	GAGAAGCGAAAACCGAGGCA	4	Gal3st3_-_5298290.23-P1P2|Gal3st3_+_5298072.23-P1P2
Vmn2r60	ENSMUST00000166447.1	Vmn2r60_-_42116306.23-ENSMUST00000166447.1	GCAACTCTCATTGATAGTGG	3	Vmn2r60_-_42115948.23-ENSMUST00000166447.1	GGAGACAAGAAACAGTAACT	4	Vmn2r60_-_42116306.23-ENSMUST00000166447.1|Vmn2r60_-_42115948.23-ENSMUST00000166447.1
Col27a1	P2	Col27a1_+_63213959.23-P2	GGGCTCCGCCGAGCTGTACG	3	Col27a1_+_63213986.23-P2	GGAAAAGTCCCAAGTCGGAG	4	Col27a1_+_63213959.23-P2|Col27a1_+_63213986.23-P2
Zfp367	P1P2	Zfp367_+_64153354.23-P1P2	GAGAGCGGCGGCCAATGACG	3	Zfp367_+_64152634.23-P1P2	GGTGTCGGGCGGGGAGGACG	4	Zfp367_+_64153354.23-P1P2|Zfp367_+_64152634.23-P1P2
Cd7	P1P2	Cd7_-_121039514.23-P1P2	GGTGGTGAAGCTCCGAGGGA	3	Cd7_-_121039531.23-P1P2	GGAGGGCTTCCTGAAGATGA	4	Cd7_-_121039514.23-P1P2|Cd7_-_121039531.23-P1P2
Coa3	P1P2	Coa3_-_101279064.23-P1P2	GGTCTCTCCGCCCTAGAGGA	3	Coa3_-_101279100.23-P1P2	GAAGCGCCCTGCTTTCTGAT	4	Coa3_-_101279064.23-P1P2|Coa3_-_101279100.23-P1P2
Eng	P1P2	Eng_-_32646449.23-P1P2	GCTTGGCAAGGGTAGGTGGA	3	Eng_-_32646590.23-P1P2	GTGGCCCGGCCCCTTCTCTA	4	Eng_-_32646449.23-P1P2|Eng_-_32646590.23-P1P2
Gatsl3	P1P2	Gatsl3_-_4218044.23-P1P2	GAGCGGGCGTCCAGCGGAAA	3	Gatsl3_-_4217982.23-P1P2	GCGAGCCTGGAGGATAGACA	4	Gatsl3_-_4218044.23-P1P2|Gatsl3_-_4217982.23-P1P2
Gdf3	P1P2	Gdf3_-_122610197.23-P1P2	GGTGTACAGCGTGAGTGAAA	3	Gdf3_+_122610023.23-P1P2	GAGGCTCCTGAATTGAGCAG	4	Gdf3_-_122610197.23-P1P2|Gdf3_+_122610023.23-P1P2
Olfr1133	ENSMUST00000099855.1	Olfr1133_+_87646599.23-ENSMUST00000099855.1	GTATAGGTTTACAGAATGAA	3	Olfr1133_+_87646378.23-ENSMUST00000099855.1	GTAGTGCCATGATGCTTATT	4	Olfr1133_+_87646599.23-ENSMUST00000099855.1|Olfr1133_+_87646378.23-ENSMUST00000099855.1
Zbtb9	P1P2	Zbtb9_+_26972921.23-P1P2	GCGCGTGCACGCGGGACAAC	3	Zbtb9_+_26972988.23-P1P2	GAGCCACGGGCTCCGCAGTA	4	Zbtb9_+_26972921.23-P1P2|Zbtb9_+_26972988.23-P1P2
Snrnp70	P1P2	Snrnp70_+_45395720.23-P1P2	GGGCGCATGCGCATTGCGAA	3	Snrnp70_+_45395649.23-P1P2	GCCGCGCGGGTTGTGAGGAG	4	Snrnp70_+_45395720.23-P1P2|Snrnp70_+_45395649.23-P1P2
Olfr843	ENSMUST00000061365.2	Olfr843_-_19249877.23-ENSMUST00000061365.2	GAAGCAATGGGCACCAATAT	3	Olfr843_+_19249651.23-ENSMUST00000061365.2	GTAAGAGATATGAGGACTGG	4	Olfr843_-_19249877.23-ENSMUST00000061365.2|Olfr843_+_19249651.23-ENSMUST00000061365.2
Cdk18	P1P2	Cdk18_+_132139729.23-P1P2	GGGGCCGGTCCGGACAAAGG	3	Cdk18_+_132139924.23-P1P2	GAATTGGCACTCAGCAGGTT	4	Cdk18_+_132139729.23-P1P2|Cdk18_+_132139924.23-P1P2
Kmt2c	P1P2	Kmt2c_+_25498951.23-P1P2	Gggccgggcggagacccctg	3	Kmt2c_-_25499017.23-P1P2	GggAGGAGAAAGGGCCGCGG	4	Kmt2c_+_25498951.23-P1P2|Kmt2c_-_25499017.23-P1P2
Rps9	P1P2	Rps9_-_3703842.23-P1P2	GGGGCAGCCTCGTTAATTCT	3	Rps9_-_3703891.23-P1P2	GAATCGCCTAACCACCTCAC	4	Rps9_-_3703842.23-P1P2|Rps9_-_3703891.23-P1P2
Pibf1	P1P2	Pibf1_-_99099518.23-P1P2	GAGGCTGCTCGCCTGGTCCC	3	Pibf1_+_99099584.23-P1P2	GACTACCTGCGGGATGACAT	4	Pibf1_-_99099518.23-P1P2|Pibf1_+_99099584.23-P1P2
Syce3	P1P2	Syce3_+_89410295.23-P1P2	GAGGCCAGCCCCAGTGGGCG	3	Syce3_+_89410407.23-P1P2	GTCCGGCCACCCAAACCCCA	4	Syce3_+_89410295.23-P1P2|Syce3_+_89410407.23-P1P2
Fam187b	P2	Fam187b_-_30973452.23-P2	GGAACCGCCCAGGTACACAA	3	Fam187b_+_30973594.23-P2	GTGGCTGCACAGGTCGCCTA	4	Fam187b_-_30973452.23-P2|Fam187b_+_30973594.23-P2
Drd1a	P1P2	Drd1a_+_54055753.23-P1P2	GGCGGGGTGTAGGAAACCAG	3	Drd1a_-_54055893.23-P1P2	GAATCTGGACGGTGAGAGGC	4	Drd1a_+_54055753.23-P1P2|Drd1a_-_54055893.23-P1P2
Cfl1	P1P2	Cfl1_+_5490352.23-P1P2	GGCTTGAGGCGCAGAGTAGG	3	Cfl1_-_5490348.23-P1P2	GTGCAACAGCCCACGCCTCT	4	Cfl1_+_5490352.23-P1P2|Cfl1_-_5490348.23-P1P2
U2af2	P1P2	U2af2_-_5062102.23-P1P2	GCGAGCTCGGGGAAGTTCcg	3	U2af2_-_5062077.23-P1P2	GGAGAACAGCCGACAGGCTT	4	U2af2_-_5062102.23-P1P2|U2af2_-_5062077.23-P1P2
Map3k10	P1P2	Map3k10_+_27674480.23-P1P2	GGGGCGCGCCACCCCATccc	3	Map3k10_+_27674655.23-P1P2	GACCCAAGGCCTCGCAGCTT	4	Map3k10_+_27674480.23-P1P2|Map3k10_+_27674655.23-P1P2
Tmem178	P1P2	Tmem178_-_80944445.23-P1P2	Gatcggccggggtagcgggt	3	Tmem178_-_80944449.23-P1P2	Ggccggggtagcgggtgggt	4	Tmem178_-_80944445.23-P1P2|Tmem178_-_80944449.23-P1P2
Pde4dip	ENSMUST00000045243.8	Pde4dip_+_97768320.23-ENSMUST00000045243.8	GAGGCCACATCCAGTGTACG	3	Pde4dip_+_97768053.23-ENSMUST00000045243.8	GCGCATGCGCGGAGCCGCAG	4	Pde4dip_+_97768320.23-ENSMUST00000045243.8|Pde4dip_+_97768053.23-ENSMUST00000045243.8
Ddr1	P2	Ddr1_-_35704132.23-P2	GCAGCCCCCGCAGAGAGGGA	3	Ddr1_-_35704190.23-P2	GAACTATGGAACGGGACCAA	4	Ddr1_-_35704132.23-P2|Ddr1_-_35704190.23-P2
Vmn2r22	ENSMUST00000170808.1	Vmn2r22_+_123650872.23-ENSMUST00000170808.1	GGAGACTCATAGTGATTCTG	3	Vmn2r22_+_123650869.23-ENSMUST00000170808.1	GACTCATAGTGATTCTGTGG	4	Vmn2r22_+_123650872.23-ENSMUST00000170808.1|Vmn2r22_+_123650869.23-ENSMUST00000170808.1
Tnfsf11	P1P2	Tnfsf11_-_78308263.23-P1P2	GGGGTCCAGTGGTTGGTTTC	3	Tnfsf11_+_78308203.23-P1P2	GTCAGAGGGCCCTGATGGGG	4	Tnfsf11_-_78308263.23-P1P2|Tnfsf11_+_78308203.23-P1P2
Kalrn	P1P2	Kalrn_-_34096180.23-P1P2	GAACACGCCTGTGTGGTTGT	3	Kalrn_-_34096086.23-P1P2	GGCGGCAAGGGAGGGACTAA	4	Kalrn_-_34096180.23-P1P2|Kalrn_-_34096086.23-P1P2
1700013D24Rik	P1P2	1700013D24Rik_-_124357137.23-P1P2	GATGAGGATCTGATTGGGAT	3	1700013D24Rik_-_124357165.23-P1P2	GTTCATCCTGTCTATGACAA	4	1700013D24Rik_-_124357137.23-P1P2|1700013D24Rik_-_124357165.23-P1P2
Fgf14	ENSMUST00000026631.5	Fgf14_-_124193332.23-ENSMUST00000026631.5	GCCAAGATGCTAGACTAAGG	3	Fgf14_-_124193027.23-ENSMUST00000026631.5	GCCCTGCTCAAGCTGCCCTC	4	Fgf14_-_124193332.23-ENSMUST00000026631.5|Fgf14_-_124193027.23-ENSMUST00000026631.5
Spdyb	P1P2	Spdyb_+_143225911.23-P1P2	GGGAAGGCCGATGACATCAT	3	Spdyb_+_143226159.23-P1P2	GGGAGAAATGATGTATAATG	4	Spdyb_+_143225911.23-P1P2|Spdyb_+_143226159.23-P1P2
Agap2	P1P2	Agap2_+_127078902.23-P1P2	GCGCTCCCCTCACATTGAGG	3	Agap2_+_127078818.23-P1P2	GCTAGGGCGGTACAAAATCC	4	Agap2_+_127078902.23-P1P2|Agap2_+_127078818.23-P1P2
Wdr77	P1P2	Wdr77_-_105959250.23-P1P2	GCCCGACCCGAGCCTGTCAG	3	Wdr77_-_105959439.23-P1P2	GACGGAAAAGCAGGCTGGAA	4	Wdr77_-_105959250.23-P1P2|Wdr77_-_105959439.23-P1P2
Cyp2a4	P1P2	Cyp2a4_-_26306678.23-P1P2	GTGAAAGACTCCCAAGGgtc	3	Cyp2a4_+_26306666.23-P1P2	GactaccacacccgacCCTT	4	Cyp2a4_-_26306678.23-P1P2|Cyp2a4_+_26306666.23-P1P2
Trp53rk	P2	Trp53rk_+_166792271.23-P2	GCAGCCCATATGGCCCTGCA	3	Trp53rk_-_166792305.23-P2	GTATGGGCTGATGAAGTTTT	4	Trp53rk_+_166792271.23-P2|Trp53rk_-_166792305.23-P2
Ints2	P1P2	Ints2_+_86257527.23-P1P2	GCGGCGCGTGCCAGAAGCTT	3	Ints2_-_86257580.23-P1P2	GAGCACTGAGAAGACGTCGG	4	Ints2_+_86257527.23-P1P2|Ints2_-_86257580.23-P1P2
Luzp2	P1P2	Luzp2_+_54835533.23-P1P2	GTGAGCTGGCGTGCTCCGCA	3	Luzp2_+_54835510.23-P1P2	GGAGAGACAATTCGCTGGGA	4	Luzp2_+_54835533.23-P1P2|Luzp2_+_54835510.23-P1P2
Krt6a	P1P2	Krt6a_+_101694644.23-P1P2	GGGGAAAACCTGTGTGGTGA	3	Krt6a_-_101694398.23-P1P2	GTTGCAGAGTGGGTAGGGCA	4	Krt6a_+_101694644.23-P1P2|Krt6a_-_101694398.23-P1P2
Scn10a	P1P2	Scn10a_-_119719268.23-P1P2	GCGGGACCTGCTGAAACCTA	3	Scn10a_-_119719355.23-P1P2	GCAGGCTGCCCGTCCTTAGC	4	Scn10a_-_119719268.23-P1P2|Scn10a_-_119719355.23-P1P2
Ugt2a1	P1P2	Ugt2a1_+_87491056.23-P1P2	GTTATAGTAGACAGCATAGG	3	Ugt2a1_+_87490982.23-P1P2	GAAAGGTGTAATAGGTAGGT	4	Ugt2a1_+_87491056.23-P1P2|Ugt2a1_+_87490982.23-P1P2
Vmn1r233	ENSMUST00000056339.1	Vmn1r233_+_20994757.23-ENSMUST00000056339.1	GATGTCTTATGAACTCATTT	3	Vmn1r233_-_20995212.23-ENSMUST00000056339.1	GCAGCTTCAAACAGTCACAC	4	Vmn1r233_+_20994757.23-ENSMUST00000056339.1|Vmn1r233_-_20995212.23-ENSMUST00000056339.1
Mageh1	P1P2	Mageh1_-_153037617.23-P1P2	GCACACGCCAAACACCCAAG	3	Mageh1_-_153037624.23-P1P2	GCAAACACCCAAGAGGAAGT	4	Mageh1_-_153037617.23-P1P2|Mageh1_-_153037624.23-P1P2
Trim2	P2	Trim2_-_84259875.23-P2	GGAAGTGACTTCAGCTGTAC	3	Trim2_-_84259913.23-P2	GGCAGCCTGCCTCCACCGCC	4	Trim2_-_84259875.23-P2|Trim2_-_84259913.23-P2
Mtx1	P1P2	Mtx1_-_89214189.23-P1P2	GGAACCGCCGGCGACACGGA	3	Mtx1_-_89214068.23-P1P2	GGTGGGGCATCGGCCTTCTG	4	Mtx1_-_89214189.23-P1P2|Mtx1_-_89214068.23-P1P2
Wdr89	P1P2	Wdr89_+_75669719.23-P1P2	GCCTAGAGGGAGGTGTTGTA	3	Wdr89_-_75669557.23-P1P2	GCCGCCCTCCGGCTCTGATT	4	Wdr89_+_75669719.23-P1P2|Wdr89_-_75669557.23-P1P2
Pank1	P1P2	Pank1_+_34877948.23-P1P2	GCCCCCCCTCCCCTTGGAGT	3	Pank1_-_34877966.23-P1P2	GCGACCCACTCCAAGGGGAG	4	Pank1_+_34877948.23-P1P2|Pank1_-_34877966.23-P1P2
BC049702	ENSMUST00000089246.5	BC049702_-_19481775.23-ENSMUST00000089246.5	Gcaccctgtagagcccatat	3	BC049702_-_19481851.23-ENSMUST00000089246.5	GtcagtgatgcccCACAGCT	4	BC049702_-_19481775.23-ENSMUST00000089246.5|BC049702_-_19481851.23-ENSMUST00000089246.5
Cpxm2	P1P2	Cpxm2_+_132154814.23-P1P2	GCCTGGGCGGGTAGGAGGGA	3	Cpxm2_-_132154858.23-P1P2	GCCTCTCCAGCAGGTGTTGA	4	Cpxm2_+_132154814.23-P1P2|Cpxm2_-_132154858.23-P1P2
Smr3a	P1P2	Smr3a_+_88002071.23-P1P2	Gactcaagatattaacaaca	3	Smr3a_-_88002206.23-P1P2	GATGAAATACCATGAGATTA	4	Smr3a_+_88002071.23-P1P2|Smr3a_-_88002206.23-P1P2
Adap1	P1P2	Adap1_+_139325692.23-P1P2	GACCTCAGCTTCAACCCAAC	3	Adap1_-_139325662.23-P1P2	GTCGCAGGGAACCCGCGCTG	4	Adap1_+_139325692.23-P1P2|Adap1_-_139325662.23-P1P2
Adcyap1r1	P1P2	Adcyap1r1_-_55451830.23-P1P2	GCGACAGAACTGGGAAAGGG	3	Adcyap1r1_-_55451827.23-P1P2	GCTGCGACAGAACTGGGAAA	4	Adcyap1r1_-_55451830.23-P1P2|Adcyap1r1_-_55451827.23-P1P2
Fh1	P1P2	Fh1_-_175625736.23-P1P2	GGGGGCGGGTTGCCTTCCCT	3	Fh1_-_175625718.23-P1P2	GTGGCCAATAATAACTAATG	4	Fh1_-_175625736.23-P1P2|Fh1_-_175625718.23-P1P2
Alkbh3	P1P2	Alkbh3_+_94010839.23-P1P2	GCGGACTCCGGGCTACCCAC	3	Alkbh3_-_94010895.23-P1P2	GCCCTGGCAACTAAAGGGCC	4	Alkbh3_+_94010839.23-P1P2|Alkbh3_-_94010895.23-P1P2
Ptgds	P1P2	Ptgds_-_25469825.23-P1P2	GCCCAAGGACTGCCCACTGA	3	Ptgds_-_25469969.23-P1P2	GCCAGCTCCAGAGGCAGAAC	4	Ptgds_-_25469825.23-P1P2|Ptgds_-_25469969.23-P1P2
Kcnn2	ENSMUST00000183850.1,ENSMUST00000066890.7	Kcnn2_-_45268393.23-ENSMUST00000183850.1,ENSMUST00000066890.7	GTCTGCGGGCGGGTGATCCC	3	Kcnn2_-_45268940.23-ENSMUST00000183850.1,ENSMUST00000066890.7	GGACAACCCTGATCAGTCGG	4	Kcnn2_-_45268393.23-ENSMUST00000183850.1,ENSMUST00000066890.7|Kcnn2_-_45268940.23-ENSMUST00000183850.1,ENSMUST00000066890.7
Pttg1	P1P2	Pttg1_-_43426300.23-P1P2	GCTACAGCCTGAGAACCAAT	3	Pttg1_-_43426477.23-P1P2	GACGACATGGACCTGCGAGA	4	Pttg1_-_43426300.23-P1P2|Pttg1_-_43426477.23-P1P2
Rab27a	P1P2	Rab27a_-_73044743.23-P1P2	GAGGCGAGCAGTCGTTTCTG	3	Rab27a_-_73044719.23-P1P2	GAGGAGACCCGATCCGTGCC	4	Rab27a_-_73044743.23-P1P2|Rab27a_-_73044719.23-P1P2
Ubr4	P2	Ubr4_+_139352422.23-P2	GACACTGGGCGGAGCGCAGG	3	Ubr4_+_139352477.23-P2	GGGAAGCCGCCGGGACTGGA	4	Ubr4_+_139352422.23-P2|Ubr4_+_139352477.23-P2
Lamtor4	P1P2	Lamtor4_+_138255692.23-P1P2	GTAGCCCAGCCCTTCGCTTG	3	Lamtor4_-_138255589.23-P1P2	GCTCTCCGGACAACTCTCGC	4	Lamtor4_+_138255692.23-P1P2|Lamtor4_-_138255589.23-P1P2
Plk2	P1P2	Plk2_-_110394867.23-P1P2	GTCAGGGCACGCGACGAACT	3	Plk2_-_110395162.23-P1P2	GGTGGCAAGTAGGCAGTGTC	4	Plk2_-_110394867.23-P1P2|Plk2_-_110395162.23-P1P2
Nedd1	P1P2	Nedd1_-_92722597.23-P1P2	GAGGCGCTGAGTTAGGCTGT	3	Nedd1_-_92722441.23-P1P2	GCCGCCTCGCATGACGTCAC	4	Nedd1_-_92722597.23-P1P2|Nedd1_-_92722441.23-P1P2
Umod	P1P2	Umod_+_119479352.23-P1P2	GATTTTGTGTCTAACTCCCA	3	Umod_+_119479314.23-P1P2	GCAGACTCATGGCTTGGAAA	4	Umod_+_119479352.23-P1P2|Umod_+_119479314.23-P1P2
H1f0	P1P2	H1f0_-_79028328.23-P1P2	GAAAGGTCGAGTTTGCTCGG	3	H1f0_+_79028299.23-P1P2	GCAAACTCGACCTTTCCCGG	4	H1f0_-_79028328.23-P1P2|H1f0_+_79028299.23-P1P2
Olfr26	ENSMUST00000104874.2	Olfr26_-_38854905.23-ENSMUST00000104874.2	GGGAGATGAAAAGAATGCAT	3	Olfr26_-_38854880.23-ENSMUST00000104874.2	GGAGATAAATTAGATGTTCA	4	Olfr26_-_38854905.23-ENSMUST00000104874.2|Olfr26_-_38854880.23-ENSMUST00000104874.2
Sypl	P1P2	Sypl_+_32954045.23-P1P2	GACCAGGCCGAGGAGGGACT	3	Sypl_+_32954143.23-P1P2	Gtggggacgaaggggcatcg	4	Sypl_+_32954045.23-P1P2|Sypl_+_32954143.23-P1P2
Olfr617	ENSMUST00000048265.4	Olfr617_-_103583808.23-ENSMUST00000048265.4	GCATCAGAACTTAATAGGGG	3	Olfr617_-_103583774.23-ENSMUST00000048265.4	GTCTCCAAACCTTGAAGAAG	4	Olfr617_-_103583808.23-ENSMUST00000048265.4|Olfr617_-_103583774.23-ENSMUST00000048265.4
Tmem210	P1P2	Tmem210_+_25288084.23-P1P2	GACTGTGAGGCAGAGAGTGT	3	Tmem210_+_25287992.23-P1P2	GAATCCTGGGACAGAAAGCT	4	Tmem210_+_25288084.23-P1P2|Tmem210_+_25287992.23-P1P2
Rbm45	P1P2	Rbm45_+_76369616.23-P1P2	Ggcgttggggtcttgcagta	3	Rbm45_-_76369821.23-P1P2	GGAAGGCTTAAGAATCAGGC	4	Rbm45_+_76369616.23-P1P2|Rbm45_-_76369821.23-P1P2
Foxp3	P1P2	Foxp3_-_7579615.23-P1P2	GATTAGAAGAGCGAGGTCTG	3	Foxp3_+_7579212.23-P1P2	GGCTGGGTTGAACAGAAGAA	4	Foxp3_-_7579615.23-P1P2|Foxp3_+_7579212.23-P1P2
Gpr15	P1P2	Gpr15_+_58718913.23-P1P2	GATCACAGGGTGCTTCTTGT	3	Gpr15_+_58719120.23-P1P2	GGCCTTAGAGTCAAATAATT	4	Gpr15_+_58718913.23-P1P2|Gpr15_+_58719120.23-P1P2
Fblim1	P1	Fblim1_-_141599969.23-P1	GAAAAGGTGACGCTCGGGGA	3	Fblim1_+_141599993.23-P1	GGGGGCGCGGCCACAGGTGG	4	Fblim1_-_141599969.23-P1|Fblim1_+_141599993.23-P1
Adh6b	P1P2	Adh6b_+_138352122.23-P1P2	GTTATGGGGAAAGTCATGAC	3	Adh6b_+_138352290.23-P1P2	GCCAAACCCTGTGTGAGGAA	4	Adh6b_+_138352122.23-P1P2|Adh6b_+_138352290.23-P1P2
Tuba3b	P1P2	Tuba3b_+_145615723.23-P1P2	GTCTGCGCATGCGTGACCTG	3	Tuba3b_+_145615764.23-P1P2	GCGGCTTTGCGCAGGACAAG	4	Tuba3b_+_145615723.23-P1P2|Tuba3b_+_145615764.23-P1P2
Minpp1	P1P2	Minpp1_+_32485830.23-P1P2	GCCGGCCCGGGAACCTCAGA	3	Minpp1_-_32485805.23-P1P2	GACGATCGGCCACACTCGCT	4	Minpp1_+_32485830.23-P1P2|Minpp1_-_32485805.23-P1P2
Tnfsf13	P1P2	Tnfsf13_-_69685341.23-P1P2	GAGGGTGGGAATACAGGCAA	3	Tnfsf13_-_69685633.23-P1P2	GGGTGCCAGGAGCAGGGAAT	4	Tnfsf13_-_69685341.23-P1P2|Tnfsf13_-_69685633.23-P1P2
Ndufs1	P1P2	Ndufs1_+_63177176.23-P1P2	GACGGGGAGCTGTGCAAAAG	3	Ndufs1_-_63177433.23-P1P2	GGAGCGGGACCTCCCGGGAG	4	Ndufs1_+_63177176.23-P1P2|Ndufs1_-_63177433.23-P1P2
Gak	P1P2	Gak_-_108629873.23-P1P2	GCGCAGAGGGTGCGATCCTA	3	Gak_+_108630005.23-P1P2	GCGAGCGGCGGGCTCTGGGG	4	Gak_-_108629873.23-P1P2|Gak_+_108630005.23-P1P2
Ppid	P1P2	Ppid_-_79591261.23-P1P2	GCACACTAAAAAGAAACCGA	3	Ppid_-_79591321.23-P1P2	GCGCAGAAACCGGAAGGTGA	4	Ppid_-_79591261.23-P1P2|Ppid_-_79591321.23-P1P2
Rccd1	P1P2	Rccd1_-_80324235.23-P1P2	GCCACTGGGGCGCGCCTGAC	3	Rccd1_+_80324232.23-P1P2	GTAACCCGGCGCATGTGTGC	4	Rccd1_-_80324235.23-P1P2|Rccd1_+_80324232.23-P1P2
Exosc2	P1P2	Exosc2_+_31670453.23-P1P2	Gagaggaacgaccccgtgta	3	Exosc2_+_31670645.23-P1P2	GCCAATGGGAATGGATAGTG	4	Exosc2_+_31670453.23-P1P2|Exosc2_+_31670645.23-P1P2
Lrrc70	ENSMUST00000057427.4	Lrrc70_+_106847347.23-ENSMUST00000057427.4	GATGGGACACGAGTTTAATC	3	Lrrc70_+_106847344.23-ENSMUST00000057427.4	GGGACACGAGTTTAATCAGG	4	Lrrc70_+_106847347.23-ENSMUST00000057427.4|Lrrc70_+_106847344.23-ENSMUST00000057427.4
Rapgef6	P1P2	Rapgef6_+_54522632.23-P1P2	GAGACTATCGGGTAGAGCTG	3	Rapgef6_-_54522661.23-P1P2	GCTACCCGATAGTCTATTTT	4	Rapgef6_+_54522632.23-P1P2|Rapgef6_-_54522661.23-P1P2
Fance	P1P2	Fance_+_28313478.23-P1P2	GGGGACGTGATCATCGGGAG	3	Fance_+_28313356.23-P1P2	GGTACGAGAAGCCCGCGAAG	4	Fance_+_28313478.23-P1P2|Fance_+_28313356.23-P1P2
Caln1	ENSMUST00000111287.1	Caln1_-_130447707.23-ENSMUST00000111287.1	GCCAGCCAACGGAGAGGTGG	3	Caln1_+_130447657.23-ENSMUST00000111287.1	GGCCAAGGGAGTTTGGGCAC	4	Caln1_-_130447707.23-ENSMUST00000111287.1|Caln1_+_130447657.23-ENSMUST00000111287.1
Olfr506	ENSMUST00000077343.2	Olfr506_+_108612144.23-ENSMUST00000077343.2	GATCGAACAAAATTTTGGTC	3	Olfr506_-_108612084.23-ENSMUST00000077343.2	GTAACAGATACATTATTTGA	4	Olfr506_+_108612144.23-ENSMUST00000077343.2|Olfr506_-_108612084.23-ENSMUST00000077343.2
Rarres2	P1P2	Rarres2_-_48572895.23-P1P2	GTTTCAGAAGACGTAAACGT	3	Rarres2_-_48572822.23-P1P2	GTGCATTGAGCCAAAggagg	4	Rarres2_-_48572895.23-P1P2|Rarres2_-_48572822.23-P1P2
Ppp1r7	P1P2	Ppp1r7_-_93343638.23-P1P2	GGGCCTAAGGCGACAGATTC	3	Ppp1r7_-_93343290.23-P1P2	GAAGTGAGGCTCCCGAAGTC	4	Ppp1r7_-_93343638.23-P1P2|Ppp1r7_-_93343290.23-P1P2
Nppa	P1P2	Nppa_+_148000379.23-P1P2	GGACCCATGCAGGGAAGCAG	3	Nppa_-_148000670.23-P1P2	GTCGCTGCAAGTGACAGAAT	4	Nppa_+_148000379.23-P1P2|Nppa_-_148000670.23-P1P2
2310030G06Rik	P1P2	2310030G06Rik_+_50746655.23-P1P2	GCGTGTGTCTTCCTGCCCTT	3	2310030G06Rik_-_50746707.23-P1P2	GTGAGAGTTATCTCACCTTA	4	2310030G06Rik_+_50746655.23-P1P2|2310030G06Rik_-_50746707.23-P1P2
Smarcad1	P1P2	Smarcad1_-_65042772.23-P1P2	GGGCGGCGGGCTCCCTTCGG	3	Smarcad1_+_65042662.23-P1P2	GAATTCTTTGAGGGAGGCGA	4	Smarcad1_-_65042772.23-P1P2|Smarcad1_+_65042662.23-P1P2
Lig1	P1P2	Lig1_+_13278521.23-P1P2	GCGGGGCATCCCGGGAGCAA	3	Lig1_+_13278680.23-P1P2	GCTGTCCCGCACAGCATGCT	4	Lig1_+_13278521.23-P1P2|Lig1_+_13278680.23-P1P2
Crtc3	P1P2	Crtc3_+_80689028.23-P1P2	GGAAGCAGGCTGGGGACCGT	3	Crtc3_+_80689004.23-P1P2	GCAGCCCTCGGTCGGCTCGC	4	Crtc3_+_80689028.23-P1P2|Crtc3_+_80689004.23-P1P2
Nadk	P1P2	Nadk_+_155563553.23-P1P2	Gaaacagggcatagcggaat	3	Nadk_+_155563388.23-P1P2	Gagactaagccggagggaag	4	Nadk_+_155563553.23-P1P2|Nadk_+_155563388.23-P1P2
Olfr1490	ENSMUST00000080162.1	Olfr1490_-_13653988.23-ENSMUST00000080162.1	GTTGATGCATGAATTCCTTG	3	Olfr1490_+_13654321.23-ENSMUST00000080162.1	GTTTAGATGCAAGTCATATA	4	Olfr1490_-_13653988.23-ENSMUST00000080162.1|Olfr1490_+_13654321.23-ENSMUST00000080162.1
Rps7	P1P2	Rps7_+_28636104.23-P1P2	GAGGTCTCCAACTAGGGGAG	3	Rps7_-_28636038.23-P1P2	GTACTGGGAACTAATGCGGG	4	Rps7_+_28636104.23-P1P2|Rps7_-_28636038.23-P1P2
Arhgef1	P2	Arhgef1_-_24904239.23-P2	GCGGAAACAAGGGTCCTCCA	3	Arhgef1_-_24904340.23-P2	GGCCGGAGAGCGGTAGGAGG	4	Arhgef1_-_24904239.23-P2|Arhgef1_-_24904340.23-P2
Bpifb9a	ENSMUST00000088924.5	Bpifb9a_+_154257667.23-ENSMUST00000088924.5	GGTCAGAGCAGATCTTTTGA	3	Bpifb9a_+_154257787.23-ENSMUST00000088924.5	GCCTTGAAAGGTCATGATGG	4	Bpifb9a_+_154257667.23-ENSMUST00000088924.5|Bpifb9a_+_154257787.23-ENSMUST00000088924.5
Myl10	P2	Myl10_-_136697840.23-P2	Gggcgtggttcgggaggcgt	3	Myl10_+_136697782.23-P2	Ggaggattctaggcggggga	4	Myl10_-_136697840.23-P2|Myl10_+_136697782.23-P2
Slc5a12	P1P2	Slc5a12_-_110597136.23-P1P2	GACGCCACACTCCCTTAGTC	3	Slc5a12_+_110597286.23-P1P2	GAGGGAGTAGGCTGGCCCGA	4	Slc5a12_-_110597136.23-P1P2|Slc5a12_+_110597286.23-P1P2
Smndc1	P1P2	Smndc1_-_53390735.23-P1P2	GCGGGTGTGGTCTGATGGGC	3	Smndc1_-_53390751.23-P1P2	GGGCAGGAAGTGACGTGTCT	4	Smndc1_-_53390735.23-P1P2|Smndc1_-_53390751.23-P1P2
Stk10	P1P2	Stk10_-_32533119.23-P1P2	GGGCCCAGGGGCCGGCCACC	3	Stk10_-_32533122.23-P1P2	GCCAGGGGCCGGCCACCCGG	4	Stk10_-_32533119.23-P1P2|Stk10_-_32533122.23-P1P2
Msh4	ENSMUST00000005630.4	Msh4_+_153906356.23-ENSMUST00000005630.4	GTGCAGTACTCGAAATAGGA	3	Msh4_-_153906301.23-ENSMUST00000005630.4	GTGTACACATAGCATAGTAC	4	Msh4_+_153906356.23-ENSMUST00000005630.4|Msh4_-_153906301.23-ENSMUST00000005630.4
Tada2a	P1P2	Tada2a_+_84129682.23-P1P2	GGACCCGCCCGCTGCCAGAC	3	Tada2a_-_84129742.23-P1P2	GGGATGGGGAGCGTGGTACC	4	Tada2a_+_84129682.23-P1P2|Tada2a_-_84129742.23-P1P2
Rnf32	P1P2	Rnf32_-_29195885.23-P1P2	GGGAGCCATGATGTAAGCGC	3	Rnf32_-_29195865.23-P1P2	GGCTGACGATACGCGAGGGG	4	Rnf32_-_29195885.23-P1P2|Rnf32_-_29195865.23-P1P2
Coq3	P1P2	Coq3_-_21879624.23-P1P2	GCATCCGCGAGTGTAGGAGG	3	Coq3_-_21879476.23-P1P2	GCGTGACTCGTAGGACGAGA	4	Coq3_-_21879624.23-P1P2|Coq3_-_21879476.23-P1P2
Mrpl44	P1P2	Mrpl44_-_79775917.23-P1P2	GAACACAAGCGAGACTGATA	3	Mrpl44_-_79775966.23-P1P2	GGCACCCATACTTACAGAAT	4	Mrpl44_-_79775917.23-P1P2|Mrpl44_-_79775966.23-P1P2
Fars2	P1P2	Fars2_+_36117570.23-P1P2	GGCGTGGTGTCAGGAGACAC	3	Fars2_+_36117604.23-P1P2	GAACCCAGGCAACGGGGCCT	4	Fars2_+_36117570.23-P1P2|Fars2_+_36117604.23-P1P2
Ceacam13	P1P2	Ceacam13_-_18009673.23-P1P2	GTCCATATAAGGCCAAATGA	3	Ceacam13_-_18009763.23-P1P2	GGGAGAAAGGTGTAGAGAAC	4	Ceacam13_-_18009673.23-P1P2|Ceacam13_-_18009763.23-P1P2
Dcaf4	P1	Dcaf4_+_83520370.23-P1	GGCTTGGCACGCTTAGGGGC	3	Dcaf4_-_83520416.23-P1	GGGCACGCTCGACCAGGACA	4	Dcaf4_+_83520370.23-P1|Dcaf4_-_83520416.23-P1
Klra5	ENSMUST00000014683.6	Klra5_+_129913404.23-ENSMUST00000014683.6	GAGTGTTTTGCCTTCTCTGT	3	Klra5_+_129913427.23-ENSMUST00000014683.6	GTTCCTATTTGTTTTGCTAA	4	Klra5_+_129913404.23-ENSMUST00000014683.6|Klra5_+_129913427.23-ENSMUST00000014683.6
Ttc17	P2	Ttc17_+_94405106.23-P2	GCTGAGGTCCGCGTGAAGGG	3	Ttc17_-_94405052.23-P2	GGCCAGAAACAATATAGCGA	4	Ttc17_+_94405106.23-P2|Ttc17_-_94405052.23-P2
Olfr137	ENSMUST00000057394.5	Olfr137_-_38305511.23-ENSMUST00000057394.5	GTCTAGAAAACATGAAGAGA	3	Olfr137_-_38305980.23-ENSMUST00000057394.5	Gtgacaaactaatactatgt	4	Olfr137_-_38305511.23-ENSMUST00000057394.5|Olfr137_-_38305980.23-ENSMUST00000057394.5
Olfr58	ENSMUST00000079660.3	Olfr58_-_19780100.23-ENSMUST00000079660.3	GTTAAGATTCTCCCTGAGGT	3	Olfr58_+_19780089.23-ENSMUST00000079660.3	GTATAACCCTTCCTACCTCA	4	Olfr58_-_19780100.23-ENSMUST00000079660.3|Olfr58_+_19780089.23-ENSMUST00000079660.3
Ing1	P2	Ing1_-_11556394.23-P2	GAGGGGCGTGAATGCGGTGG	3	Ing1_+_11556298.23-P2	GTGGCCTGTCATTGTCGCTG	4	Ing1_-_11556394.23-P2|Ing1_+_11556298.23-P2
Scgb2b2	P1P2	Scgb2b2_-_31302421.23-P1P2	GGGGTGATTGGAGCAAAAAG	3	Scgb2b2_+_31302613.23-P1P2	GTTCCCCCTTGAACTGGGGA	4	Scgb2b2_-_31302421.23-P1P2|Scgb2b2_+_31302613.23-P1P2
Nbas	P1P2	Nbas_-_13268937.23-P1P2	GGGCACAAATGAACAAAAAG	3	Nbas_-_13268883.23-P1P2	GCAGCTTCGTAGACGCTGAC	4	Nbas_-_13268937.23-P1P2|Nbas_-_13268883.23-P1P2
Nnat	P1P2	Nnat_-_157559943.23-P1P2	GTTCTGGAACGGTGTTAGAG	3	Nnat_+_157559844.23-P1P2	GTACAGTGTAGAATGAGGGT	4	Nnat_-_157559943.23-P1P2|Nnat_+_157559844.23-P1P2
C1qtnf9	P1P2	C1qtnf9_+_60768036.23-P1P2	GCAAAATAGCAGGAAGGGGA	3	C1qtnf9_+_60768009.23-P1P2	GAGGGAGGCACAAGATGTCT	4	C1qtnf9_+_60768036.23-P1P2|C1qtnf9_+_60768009.23-P1P2
Cotl1	P1P2	Cotl1_+_119840755.23-P1P2	GAAGGTGGTGGAAGAAGCGA	3	Cotl1_+_119840831.23-P1P2	GAACGGCGTAagggaaggag	4	Cotl1_+_119840755.23-P1P2|Cotl1_+_119840831.23-P1P2
Abi2	P1P2	Abi2_+_60409594.23-P1P2	GAGGCGGGGCGCGAGCCGAC	3	Abi2_-_60409593.23-P1P2	GGCCGCGGTGACCGTCCTCG	4	Abi2_+_60409594.23-P1P2|Abi2_-_60409593.23-P1P2
Pde4b	ENSMUST00000106908.2	Pde4b_+_102255110.23-ENSMUST00000106908.2	GGGGTCCGCACACTCTTCCC	3	Pde4b_-_102254962.23-ENSMUST00000106908.2	GACAAACCCCATCCACAAGG	4	Pde4b_+_102255110.23-ENSMUST00000106908.2|Pde4b_-_102254962.23-ENSMUST00000106908.2
Igfbp5	P1P2	Igfbp5_-_72875119.23-P1P2	GTACGGAAAGGGCTTTGGGG	3	Igfbp5_-_72874638.23-P1P2	GAACAGGTAAGAGGCGTCGG	4	Igfbp5_-_72875119.23-P1P2|Igfbp5_-_72874638.23-P1P2
Olfr998	ENSMUST00000052307.2	Olfr998_+_85590374.23-ENSMUST00000052307.2	GAAATATCATGTATAATCTT	3	Olfr998_+_85590367.23-ENSMUST00000052307.2	GATGTATAATCTTGGGTACA	4	Olfr998_+_85590374.23-ENSMUST00000052307.2|Olfr998_+_85590367.23-ENSMUST00000052307.2
Slc9b2	P1P2	Slc9b2_+_135307587.23-P1P2	GcggggcaCACTCTCAGTTC	3	Slc9b2_+_135307651.23-P1P2	GGGAAAACAGGGAGGTCCAG	4	Slc9b2_+_135307587.23-P1P2|Slc9b2_+_135307651.23-P1P2
Prkra	P1P2	Prkra_+_76648205.23-P1P2	GTGGGAACCCAACTAGAGAG	3	Prkra_+_76648429.23-P1P2	GGAAACTCGGGGAACCGAAG	4	Prkra_+_76648205.23-P1P2|Prkra_+_76648429.23-P1P2
Olfr532	ENSMUST00000073226.1	Olfr532_-_140420228.23-ENSMUST00000073226.1	GAGAGAGGACGATTGGGATC	3	Olfr532_-_140419836.23-ENSMUST00000073226.1	GTCAAGGAGACACAGGGTAT	4	Olfr532_-_140420228.23-ENSMUST00000073226.1|Olfr532_-_140419836.23-ENSMUST00000073226.1
Palb2	P1P2	Palb2_+_122133249.23-P1P2	GGGAACCAGTGCAGCCGGGA	3	Palb2_+_122133222.23-P1P2	GGCGACCGTCCAGTCCTCGA	4	Palb2_+_122133249.23-P1P2|Palb2_+_122133222.23-P1P2
Reck	P1P2	Reck_-_43875331.23-P1P2	GGGACAGAGGCATTCCACAG	3	Reck_+_43875339.23-P1P2	GTCTTCAAACGGGAAGTCAG	4	Reck_-_43875331.23-P1P2|Reck_+_43875339.23-P1P2
Alkbh8	P1P2	Alkbh8_-_3335084.23-P1P2	Gcacactagagagactttat	3	Alkbh8_-_3335450.23-P1P2	GTGAGTCCCGAAGGGGGTTG	4	Alkbh8_-_3335084.23-P1P2|Alkbh8_-_3335450.23-P1P2
Coq2	P1P2	Coq2_-_100674292.23-P1P2	GCATCCAGGGCGACGGGCCG	3	Coq2_-_100674563.23-P1P2	GTCACCTTCTAACACTAAAA	4	Coq2_-_100674292.23-P1P2|Coq2_-_100674563.23-P1P2
Ryk	P1P2	Ryk_+_102834915.23-P1P2	GCCGCCGCCCGGGAACGGGA	3	Ryk_+_102834753.23-P1P2	GGGGGTGGGGGCCGCGCGTA	4	Ryk_+_102834915.23-P1P2|Ryk_+_102834753.23-P1P2
Yy2	P1	Yy2_+_157569291.23-P1	GTAGCTCAGAGATAGGATAA	3	Yy2_-_157569183.23-P1	GGAGTTGCAGAACCTTCCCT	4	Yy2_+_157569291.23-P1|Yy2_-_157569183.23-P1
Tubgcp5	P1P2	Tubgcp5_+_55794044.23-P1P2	GTGCCTGGGAAAGGTGCTGA	3	Tubgcp5_+_55794007.23-P1P2	GGCTGGATGCGGTGCGTCCG	4	Tubgcp5_+_55794044.23-P1P2|Tubgcp5_+_55794007.23-P1P2
Gpx3	P1P2	Gpx3_+_54902756.23-P1P2	GGCGACGGTGACACAAGCCT	3	Gpx3_+_54902777.23-P1P2	GTCCTCCTCTCCCCAGACCG	4	Gpx3_+_54902756.23-P1P2|Gpx3_+_54902777.23-P1P2
Lrrc55	P1P2	Lrrc55_-_85196963.23-P1P2	GCTGTCAGCAGGCCCTGGAA	3	Lrrc55_+_85196848.23-P1P2	GACTGGGTCCATGCTCCCCA	4	Lrrc55_-_85196963.23-P1P2|Lrrc55_+_85196848.23-P1P2
Foxa2	P2	Foxa2_-_148047157.23-P2	GCAAACAGGGCAGTAGGTGG	3	Foxa2_-_148047239.23-P2	GTTCTCTGCCTGCAGAGACC	4	Foxa2_-_148047157.23-P2|Foxa2_-_148047239.23-P2
Armcx4	P1P2	Armcx4_-_134686403.23-P1P2	GGGCGGGGCGCTCTGGGGCT	3	Armcx4_-_134686383.23-P1P2	GAGCGCAGAGATGAGTGACA	4	Armcx4_-_134686403.23-P1P2|Armcx4_-_134686383.23-P1P2
Htr2b	P1P2	Htr2b_+_86111955.23-P1P2	GAAGACTCAGAGCAAGTCAG	3	Htr2b_-_86111981.23-P1P2	GGACTTGCTCTGAGTCTTAG	4	Htr2b_+_86111955.23-P1P2|Htr2b_-_86111981.23-P1P2
Rassf2	P1P2	Rassf2_+_132030042.23-P1P2	GGCTCCGCCCCCTagagggg	3	Rassf2_+_132029976.23-P1P2	GagAACTGCAGGGTGGCGGG	4	Rassf2_+_132030042.23-P1P2|Rassf2_+_132029976.23-P1P2
Dym	P1P2	Dym_+_75018629.23-P1P2	GGGGCAACCACATAGCCACG	3	Dym_+_75018552.23-P1P2	GGGTAACTTAATTGAGACTA	4	Dym_+_75018629.23-P1P2|Dym_+_75018552.23-P1P2
Prim1	P1P2	Prim1_-_128015101.23-P1P2	GGGACTCTAAAAGGAGCAGT	3	Prim1_-_128015029.23-P1P2	GTAAAGGTCTCTCCTTTTCG	4	Prim1_-_128015101.23-P1P2|Prim1_-_128015029.23-P1P2
Cbx8	P1P2	Cbx8_+_119040981.23-P1P2	GGCGGGAGGAAGCGCTGGGA	3	Cbx8_+_119041032.23-P1P2	GAGAACGGGCCCAGGACGCT	4	Cbx8_+_119040981.23-P1P2|Cbx8_+_119041032.23-P1P2
Man2b1	P1P2	Man2b1_+_85083131.23-P1P2	GCACCCAGAGCTCTTTTGGC	3	Man2b1_+_85083231.23-P1P2	GACCGCCAATCGGTGAGGAA	4	Man2b1_+_85083131.23-P1P2|Man2b1_+_85083231.23-P1P2
Olfr685	ENSMUST00000051355.5	Olfr685_+_105181762.23-ENSMUST00000051355.5	GGGAACTGACATGTAATAGG	3	Olfr685_-_105181466.23-ENSMUST00000051355.5	Gggaaataaagttagattga	4	Olfr685_+_105181762.23-ENSMUST00000051355.5|Olfr685_-_105181466.23-ENSMUST00000051355.5
Otud6b	P1P2	Otud6b_-_14826579.23-P1P2	GTGCGCGCTCGGACCGCTCT	3	Otud6b_-_14826500.23-P1P2	GGCCCAGCCCCGCCTCAAGG	4	Otud6b_-_14826579.23-P1P2|Otud6b_-_14826500.23-P1P2
Mthfr	P1	Mthfr_+_148039032.23-P1	GCTAAGGGAAACAGGACGAG	3	Mthfr_+_148039047.23-P1	GCGGAGCTGTCGGTTGCTAA	4	Mthfr_+_148039032.23-P1|Mthfr_+_148039047.23-P1
Cdk16	P1P2	Cdk16_+_20688318.23-P1P2	GGAGCCTTCTGCAGCGGGAG	3	Cdk16_+_20688279.23-P1P2	GCCAGCAGGGAATGTGGCGT	4	Cdk16_+_20688318.23-P1P2|Cdk16_+_20688279.23-P1P2
Ccdc85c	P1P2	Ccdc85c_-_108275450.23-P1P2	Gctgccccgcccaccccggg	3	Ccdc85c_+_108275516.23-P1P2	GCCGCGTAGGGGGACCTCGG	4	Ccdc85c_-_108275450.23-P1P2|Ccdc85c_+_108275516.23-P1P2
Nrep	P1P2	Nrep_-_33463960.23-P1P2	GgTAGGGCACAGGGCCCCGG	3	Nrep_-_33463584.23-P1P2	GGTGCAGCCTCGGAAAAGGA	4	Nrep_-_33463960.23-P1P2|Nrep_-_33463584.23-P1P2
Sult2a6	P1P2	Sult2a6_+_14255259.23-P1P2	Ggctttgagggtaagaagaa	3	Sult2a6_+_14254996.23-P1P2	GATACAGTAACCGTTGACTA	4	Sult2a6_+_14255259.23-P1P2|Sult2a6_+_14254996.23-P1P2
Tti1	P1P2	Tti1_-_158028495.23-P1P2	GGGGAAAAAGGGTTCCGGTG	3	Tti1_+_158028607.23-P1P2	GGAAAACGATCCTTAGGAGG	4	Tti1_-_158028495.23-P1P2|Tti1_+_158028607.23-P1P2
Ptrf	P1P2	Ptrf_-_100970736.23-P1P2	GGAGGGGAGACCAACCCCGG	3	Ptrf_-_100970851.23-P1P2	GGAGGCTGCGGCAGCGGGAC	4	Ptrf_-_100970736.23-P1P2|Ptrf_-_100970851.23-P1P2
Kctd2	P1P2	Kctd2_+_115420012.23-P1P2	GGACGGGACTCCATGCTCAT	3	Kctd2_+_115419974.23-P1P2	GGACCCGCCTATTGCTCGTT	4	Kctd2_+_115420012.23-P1P2|Kctd2_+_115419974.23-P1P2
Olfr118	ENSMUST00000122036.1	Olfr118_-_37671710.23-ENSMUST00000122036.1	GAACGCATGTAgctgaattc	3	Olfr118_-_37671540.23-ENSMUST00000122036.1	GCCCAAAACACAAAGAGAAT	4	Olfr118_-_37671710.23-ENSMUST00000122036.1|Olfr118_-_37671540.23-ENSMUST00000122036.1
Erc2	P1P2	Erc2_+_27622317.23-P1P2	GGAGGAGCCTGGAGGGGCCG	3	Erc2_-_27622310.23-P1P2	GGCCCCCCGCGGAGGTGCCC	4	Erc2_+_27622317.23-P1P2|Erc2_-_27622310.23-P1P2
Acadvl	P1P2	Acadvl_+_70015496.23-P1P2	GCCTAGGTCAGGTAGAATAC	3	Acadvl_-_70015651.23-P1P2	GTAAATGACTAGAAGGTTGG	4	Acadvl_+_70015496.23-P1P2|Acadvl_-_70015651.23-P1P2
Tulp4	ENSMUST00000039655.2	Tulp4_-_6137883.23-ENSMUST00000039655.2	GGCTCTGCTACACGCCTAGG	3	Tulp4_-_6137895.23-ENSMUST00000039655.2	GGCCTAGGTGGCTGGTTTAA	4	Tulp4_-_6137883.23-ENSMUST00000039655.2|Tulp4_-_6137895.23-ENSMUST00000039655.2
Prkar1b	P1P2	Prkar1b_+_139129825.23-P1P2	GACAGCTGTGGGGCGGTCCC	3	Prkar1b_+_139129806.23-P1P2	GTGGGGAGGACAGCGGTCGG	4	Prkar1b_+_139129825.23-P1P2|Prkar1b_+_139129806.23-P1P2
Mfap1a	P1P2	Mfap1a_+_121506782.23-P1P2	GTCTGGAAAATGTCGAAGGC	3	Mfap1a_+_121506766.23-P1P2	GGGCGGGAAACTTGCTCGAA	4	Mfap1a_+_121506782.23-P1P2|Mfap1a_+_121506766.23-P1P2
Gm12794	ENSMUST00000052027.7	Gm12794_-_101939908.23-ENSMUST00000052027.7	GTAGCCCTGCTTGCTCGCAC	3	Gm12794_+_101939871.23-ENSMUST00000052027.7	GGGGCTATATTATATTGATT	4	Gm12794_-_101939908.23-ENSMUST00000052027.7|Gm12794_+_101939871.23-ENSMUST00000052027.7
Clint1	P1P2	Clint1_+_45851846.23-P1P2	GGAGAGGGCTGAGATCGCTG	3	Clint1_+_45851937.23-P1P2	GGCGCTGCGTGGGGCGGAAG	4	Clint1_+_45851846.23-P1P2|Clint1_+_45851937.23-P1P2
Prf1	P1P2	Prf1_-_61297686.23-P1P2	GGAGGAGGTGACAACAGGGT	3	Prf1_+_61297699.23-P1P2	GGCCCCCAGAGTGTGGTCAC	4	Prf1_-_61297686.23-P1P2|Prf1_+_61297699.23-P1P2
Tsnax	P1P2	Tsnax_-_125012862.23-P1P2	GCGGGTAGGCACTTGGACGT	3	Tsnax_-_125012902.23-P1P2	GCGGAAGTATGTGCAGCACA	4	Tsnax_-_125012862.23-P1P2|Tsnax_-_125012902.23-P1P2
Wbscr22	P1P2	Wbscr22_-_135064217.23-P1P2	GCAGGATTCGAGGCCTCCAT	3	Wbscr22_-_135064253.23-P1P2	GCCCCCTCCCAGCCACAACA	4	Wbscr22_-_135064217.23-P1P2|Wbscr22_-_135064253.23-P1P2
Epb4.1l2	P1P2	Epb4.1l2_-_25359690.23-P1P2	GAGAGCCGCGCGAACCCCTC	3	Epb4.1l2_-_25359655.23-P1P2	GGCGAAACGCACCCCTGCGG	4	Epb4.1l2_-_25359690.23-P1P2|Epb4.1l2_-_25359655.23-P1P2
Mnt	P1P2	Mnt_+_74830799.23-P1P2	GCCCACCGCGCGCGCACACG	3	Mnt_+_74830769.23-P1P2	GGGGGTGAGAAGATGGAACC	4	Mnt_+_74830799.23-P1P2|Mnt_+_74830769.23-P1P2
Kctd4	P1P2	Kctd4_+_75954974.23-P1P2	GTCTTGTGGAAATGAACTTC	3	Kctd4_-_75954839.23-P1P2	GTGCCAATTCTGTTTAAGAA	4	Kctd4_+_75954974.23-P1P2|Kctd4_-_75954839.23-P1P2
Cox20	P1P2	Cox20_-_178319012.23-P1P2	GTGCGGGTTGGAAAACAGTG	3	Cox20_-_178318945.23-P1P2	GCTGCCTGCGAGACAGGAAC	4	Cox20_-_178319012.23-P1P2|Cox20_-_178318945.23-P1P2
Ces2g	P1P2	Ces2g_+_104961673.23-P1P2	GTGAGCCAAAAAGATAAAGG	3	Ces2g_+_104961565.23-P1P2	Gaggattttccagagtagca	4	Ces2g_+_104961673.23-P1P2|Ces2g_+_104961565.23-P1P2
Osbpl6	P1P2	Osbpl6_+_76406373.23-P1P2	GCCACCGCGCCCCCTTCGTG	3	Osbpl6_-_76406306.23-P1P2	GTCTCCCGGGCAGGGTCTTT	4	Osbpl6_+_76406373.23-P1P2|Osbpl6_-_76406306.23-P1P2
Fhl5	P1P2	Fhl5_+_25243088.23-P1P2	GTGAAAGAATGGTCTCAAAT	3	Fhl5_+_25242887.23-P1P2	GTGGCTCATGACATAACAAT	4	Fhl5_+_25243088.23-P1P2|Fhl5_+_25242887.23-P1P2
AI607873	P1P2	AI607873_+_173742158.23-P1P2	GTTGGCACTTGCAAACCCTG	3	AI607873_-_173742046.23-P1P2	GGCATGGTGTACCTATACCA	4	AI607873_+_173742158.23-P1P2|AI607873_-_173742046.23-P1P2
Slc25a34	P1P2	Slc25a34_-_141624004.23-P1P2	GAAAGAGCCAAGCTAGAGTA	3	Slc25a34_-_141623944.23-P1P2	GCCTGGGCCATGGGATCTGG	4	Slc25a34_-_141624004.23-P1P2|Slc25a34_-_141623944.23-P1P2
Gm4027	ENSMUST00000164838.2	Gm4027_+_87618356.23-ENSMUST00000164838.2	Gtagttctgacgcttccttg	3	Gm4027_-_87618363.23-ENSMUST00000164838.2	Gtgtctttagaaacaccaca	4	Gm4027_+_87618356.23-ENSMUST00000164838.2|Gm4027_-_87618363.23-ENSMUST00000164838.2
Tfcp2	P1P2	Tfcp2_-_100552150.23-P1P2	GCTTCCGCCCCCGGAGTAGT	3	Tfcp2_-_100552154.23-P1P2	GCGCCCCCGGAGTAGTGGGC	4	Tfcp2_-_100552150.23-P1P2|Tfcp2_-_100552154.23-P1P2
Gemin5	P1	Gemin5_-_58168559.23-P1	GTAAACCCCGCCCCTGGAGG	3	Gemin5_+_58168547.23-P1	GCCGTAGCGCCCGCCTCCAG	4	Gemin5_-_58168559.23-P1|Gemin5_+_58168547.23-P1
Cir1	P1P2	Cir1_-_73312825.23-P1P2	GCGGTCAGCCCGAACAAGCG	3	Cir1_-_73312771.23-P1P2	GTCTGCGGGGTCGCGAGCGG	4	Cir1_-_73312825.23-P1P2|Cir1_-_73312771.23-P1P2
Mrc1	P1P2	Mrc1_+_14229116.23-P1P2	GGTGCTGGGCAGTAACCAAA	3	Mrc1_+_14229083.23-P1P2	GTGGGTGGGAAAAAGTCTCC	4	Mrc1_+_14229116.23-P1P2|Mrc1_+_14229083.23-P1P2
Pfdn5	P1P2	Pfdn5_-_102326055.23-P1P2	GAAGCTTGAGATCCGAAAAG	3	Pfdn5_+_102326111.23-P1P2	GGCCCTCCGCGTTACCTCCG	4	Pfdn5_-_102326055.23-P1P2|Pfdn5_+_102326111.23-P1P2
Il1rl2	P1P2	Il1rl2_-_40324340.23-P1P2	GGGGCAAGCCTTTATTGAGA	3	Il1rl2_-_40324276.23-P1P2	GAAAAATGGGACAACCAAAA	4	Il1rl2_-_40324340.23-P1P2|Il1rl2_-_40324276.23-P1P2
Atp6v1g1	P1P2	Atp6v1g1_-_63544499.23-P1P2	GTGGGCACACTATTAATTTC	3	Atp6v1g1_-_63544750.23-P1P2	GTGGGAGTCACCGGACTCAA	4	Atp6v1g1_-_63544499.23-P1P2|Atp6v1g1_-_63544750.23-P1P2
Lancl3	P1P2	Lancl3_-_9199723.23-P1P2	GCTCTGAGGACACAGGGGAC	3	Lancl3_-_9199924.23-P1P2	GAGCTGCGGCAGCGCAAGAG	4	Lancl3_-_9199723.23-P1P2|Lancl3_-_9199924.23-P1P2
Ltv1	P1P2	Ltv1_-_13193318.23-P1P2	GGAGTAGCCTACTTACCTGA	3	Ltv1_-_13193234.23-P1P2	GGAACCTTCCCGGGGACTTC	4	Ltv1_-_13193318.23-P1P2|Ltv1_-_13193234.23-P1P2
Pdzk1	P1P2	Pdzk1_-_96829960.23-P1P2	GGCGGGGCTTGATTTTACTG	3	Pdzk1_-_96830016.23-P1P2	GCTGGCCGGGAGCAGGACAG	4	Pdzk1_-_96829960.23-P1P2|Pdzk1_-_96830016.23-P1P2
Cped1	P1P2	Cped1_-_21985784.23-P1P2	GAGGTAGCCACGTTCCAAGT	3	Cped1_-_21985791.23-P1P2	GCACGTTCCAAGTTGGGATA	4	Cped1_-_21985784.23-P1P2|Cped1_-_21985791.23-P1P2
Stx3	P1P2	Stx3_+_11818978.23-P1P2	GCGGGGAGCGGCCCAGGTAT	3	Stx3_-_11818988.23-P1P2	GCCTGGGCCCGCCCCATACC	4	Stx3_+_11818978.23-P1P2|Stx3_-_11818988.23-P1P2
Slc16a12	P1P2	Slc16a12_-_34747237.23-P1P2	GCCCGCCGGACACTGTCACT	3	Slc16a12_+_34747357.23-P1P2	GTCCCCGCGCCCCTCACCCG	4	Slc16a12_-_34747237.23-P1P2|Slc16a12_+_34747357.23-P1P2
Olfr520	ENSMUST00000098264.1	Olfr520_-_99734946.23-ENSMUST00000098264.1	GTAGACTGATGATTGGTACT	3	Olfr520_-_99734924.23-ENSMUST00000098264.1	GTTGTCAGCTAACTTCAGTT	4	Olfr520_-_99734946.23-ENSMUST00000098264.1|Olfr520_-_99734924.23-ENSMUST00000098264.1
Tbc1d32	P1P2	Tbc1d32_+_56228820.23-P1P2	GAGCCTCAGCAAGTTCTCGG	3	Tbc1d32_-_56229001.23-P1P2	GCCAGGGGAGGGGTTAATCC	4	Tbc1d32_+_56228820.23-P1P2|Tbc1d32_-_56229001.23-P1P2
Thbs2	P1P2	Thbs2_+_14694299.23-P1P2	GTCCTCCCCGGGCCCCTGTC	3	Thbs2_+_14694277.23-P1P2	GAAAGCCTGGGTGGACCTGT	4	Thbs2_+_14694299.23-P1P2|Thbs2_+_14694277.23-P1P2
Defb22	P1P2	Defb22_-_152490237.23-P1P2	GCAGTAGAGCAGAAGAATAA	3	Defb22_-_152490335.23-P1P2	GGCCATGCCTTCAGGGAAGT	4	Defb22_-_152490237.23-P1P2|Defb22_-_152490335.23-P1P2
Edc4	P1P2	Edc4_+_105880791.23-P1P2	GTATCAGAGGCAGCCTCCGT	3	Edc4_-_105880705.23-P1P2	GTAGATCTCCAGAGATGGTA	4	Edc4_+_105880791.23-P1P2|Edc4_-_105880705.23-P1P2
Uba3	P1P2	Uba3_-_97205727.23-P1P2	GAAACGGAGAGGCGGAGCTG	3	Uba3_-_97205841.23-P1P2	GAAGGCGGAGCCAGTACTAG	4	Uba3_-_97205727.23-P1P2|Uba3_-_97205841.23-P1P2
Dnajb8	P1P2	Dnajb8_+_88222151.23-P1P2	GGTGGTGAGGCTGATCACTG	3	Dnajb8_+_88222014.23-P1P2	GTGGGGCAGTGGTCAACACA	4	Dnajb8_+_88222151.23-P1P2|Dnajb8_+_88222014.23-P1P2
Aox2	P1P2	Aox2_+_58277815.23-P1P2	GAACTAAGCCGGGGTCTCCT	3	Aox2_+_58278236.23-P1P2	GCCTCACCTCCCACCAACCT	4	Aox2_+_58277815.23-P1P2|Aox2_+_58278236.23-P1P2
Cnga2	P1P2	Cnga2_-_71991480.23-P1P2	GTAGCAGCCGGGGTAAGAAG	3	Cnga2_-_71991789.23-P1P2	GGTGCAAGGGAGAGTCCCTT	4	Cnga2_-_71991480.23-P1P2|Cnga2_-_71991789.23-P1P2
Ikbke	P1P2	Ikbke_-_131279690.23-P1P2	GTCCACTCCCCCTTCAGTAA	3	Ikbke_-_131279719.23-P1P2	GGATTCTGTGAGTTGTCAAG	4	Ikbke_-_131279690.23-P1P2|Ikbke_-_131279719.23-P1P2
Chi3l1	P1	Chi3l1_-_134182365.23-P1	GCCTCCACTGGCCAGCAATT	3	Chi3l1_-_134182297.23-P1	GTACTGCAAGACTTGCCCCA	4	Chi3l1_-_134182365.23-P1|Chi3l1_-_134182297.23-P1
Plekhg6	P1P2	Plekhg6_-_125380663.23-P1P2	GACCAGGAGTGCTCACTTCT	3	Plekhg6_+_125380625.23-P1P2	GCTGGTCTGGGGTTGGTGTA	4	Plekhg6_-_125380663.23-P1P2|Plekhg6_+_125380625.23-P1P2
Hes1	P1P2	Hes1_-_30065219.23-P1P2	GGGGGGGCGCAGTCCACGAG	3	Hes1_+_30065134.23-P1P2	GCCTGAGCCCGGGGCACCGG	4	Hes1_-_30065219.23-P1P2|Hes1_+_30065134.23-P1P2
AI427809	P1P2	AI427809_+_53270511.23-P1P2	GgtctcagatgGTGAAGAAT	3	AI427809_-_53270745.23-P1P2	Gaggaggtggcgtgggtacg	4	AI427809_+_53270511.23-P1P2|AI427809_-_53270745.23-P1P2
Pax6	P1	Pax6_-_105668733.23-P1	GCCCCTGAAGACTCTTAGGA	3	Pax6_-_105668850.23-P1	GCGCGCCCGGCAACCAATGA	4	Pax6_-_105668733.23-P1|Pax6_-_105668850.23-P1
Aldh1b1	P1P2	Aldh1b1_-_45798969.23-P1P2	GTGGACCTAAGATTAGGCTA	3	Aldh1b1_-_45798979.23-P1P2	GATTAGGCTAGGGGAAATCA	4	Aldh1b1_-_45798969.23-P1P2|Aldh1b1_-_45798979.23-P1P2
Hexdc	P1P2	Hexdc_+_121204310.23-P1P2	GGGGTGGGACCTAACAGGGG	3	Hexdc_-_121204361.23-P1P2	GGCCACGCCTCACTCTGCCA	4	Hexdc_+_121204310.23-P1P2|Hexdc_-_121204361.23-P1P2
S100a16	P2	S100a16_+_90541014.23-P2	GCACCCAGCTGGTCCCAGGA	3	S100a16_-_90540785.23-P2	GGGAGTCCAGAAAAGGTGTA	4	S100a16_+_90541014.23-P2|S100a16_-_90540785.23-P2
Nxpe3	P1P2	Nxpe3_+_55895570.23-P1P2	GGGCTAGAGTGTATCTCCGG	3	Nxpe3_+_55895630.23-P1P2	GGGGAAACGCTGATGTCCGA	4	Nxpe3_+_55895570.23-P1P2|Nxpe3_+_55895630.23-P1P2
Tceb1	P1P2	Tceb1_+_16657015.23-P1P2	GTCCTCCAGACGCAAGTTAC	3	Tceb1_-_16657061.23-P1P2	GGCGTTGTGGGCAGTAAAAC	4	Tceb1_+_16657015.23-P1P2|Tceb1_-_16657061.23-P1P2
Zfp474	P1P2	Zfp474_+_52615878.23-P1P2	GTGGCAACCCGTCAACAGAA	3	Zfp474_-_52615652.23-P1P2	GTGTCCCTAGATAAAAGGAT	4	Zfp474_+_52615878.23-P1P2|Zfp474_-_52615652.23-P1P2
2200002J24Rik	P1P2	2200002J24Rik_-_30698734.23-P1P2	GGGTGTGACGGTAACAAAAA	3	2200002J24Rik_-_30698868.23-P1P2	GGCACTGGAGGCACACCCAC	4	2200002J24Rik_-_30698734.23-P1P2|2200002J24Rik_-_30698868.23-P1P2
Vmn2r19	ENSMUST00000073948.6	Vmn2r19_+_123308034.23-ENSMUST00000073948.6	GAGTAATCCTGATTGTTGGC	3	Vmn2r19_+_123308038.23-ENSMUST00000073948.6	GACCTAGTAATCCTGATTGT	4	Vmn2r19_+_123308034.23-ENSMUST00000073948.6|Vmn2r19_+_123308038.23-ENSMUST00000073948.6
Olfr498	ENSMUST00000074787.1	Olfr498_-_108465239.23-ENSMUST00000074787.1	GTGTAATGTTCTCCATGCCC	3	Olfr498_+_108465234.23-ENSMUST00000074787.1	GACTTCATTTCAGTTAACCG	4	Olfr498_-_108465239.23-ENSMUST00000074787.1|Olfr498_+_108465234.23-ENSMUST00000074787.1
Awat2	P1P2	Awat2_+_100412663.23-P1P2	GAGGCCCTGCAGTCTTAGGG	3	Awat2_-_100412857.23-P1P2	GGGTAAGAGAGCAACTGCCA	4	Awat2_+_100412663.23-P1P2|Awat2_-_100412857.23-P1P2
Ryr1	P1P2	Ryr1_-_29125097.23-P1P2	GTGGCGGGGAACCTGAGGGC	3	Ryr1_-_29125173.23-P1P2	GGCAGGAAGCATGCCCTGTG	4	Ryr1_-_29125097.23-P1P2|Ryr1_-_29125173.23-P1P2
Egr2	P1	Egr2_+_67537722.23-P1	GCATACGGGCTTGGCTGCGC	3	Egr2_+_67537671.23-P1	GAGCCGGTGGACAACCACCC	4	Egr2_+_67537722.23-P1|Egr2_+_67537671.23-P1
Slc35a1	P1P2	Slc35a1_-_34687353.23-P1P2	GCACACGCGCGAGGAGGAAG	3	Slc35a1_+_34687692.23-P1P2	GAAGCTAGACAGTGACAGTA	4	Slc35a1_-_34687353.23-P1P2|Slc35a1_+_34687692.23-P1P2
Fnbp1	P1P2	Fnbp1_+_31142243.23-P1P2	GGGTAGAAGGCAGATGGCGA	3	Fnbp1_+_31142181.23-P1P2	GCGCAGGTCCCAAAAGAGTT	4	Fnbp1_+_31142243.23-P1P2|Fnbp1_+_31142181.23-P1P2
Pomp	P1P2	Pomp_+_147860423.23-P1P2	GTCGCGGGACGGTGTTAGAT	3	Pomp_+_147860514.23-P1P2	GAGGGAGTAGCGTTGGGCCG	4	Pomp_+_147860423.23-P1P2|Pomp_+_147860514.23-P1P2
Ephx3	P1P2	Ephx3_-_32189570.23-P1P2	GCGGAAAGAGGGACCGTGGG	3	Ephx3_-_32189646.23-P1P2	GGTAGCAGGTGGCAGTGTTC	4	Ephx3_-_32189570.23-P1P2|Ephx3_-_32189646.23-P1P2
Armc4	P1P2	Armc4_-_7298124.23-P1P2	GGCTCATGCCAGCTCAGTCT	3	Armc4_+_7297957.23-P1P2	GGCGGCGGGCGGGTGTTTAC	4	Armc4_-_7298124.23-P1P2|Armc4_+_7297957.23-P1P2
Olfr43	ENSMUST00000078936.2	Olfr43_-_74207816.23-ENSMUST00000078936.2	GGGGAAGACTGTAAGTTATA	3	Olfr43_-_74207364.23-ENSMUST00000078936.2	GTTTGGAGAAGTCCCATCAG	4	Olfr43_-_74207816.23-ENSMUST00000078936.2|Olfr43_-_74207364.23-ENSMUST00000078936.2
Bach1	P1P2	Bach1_-_87698886.23-P1P2	GAGGGCTTCAGCTAcggggc	3	Bach1_+_87698818.23-P1P2	GTGGAGCCACGCCCCGTTCC	4	Bach1_-_87698886.23-P1P2|Bach1_+_87698818.23-P1P2
Npl	P1P2	Npl_-_153549776.23-P1P2	GGGACCACGTGGGGCCGCGC	3	Npl_+_153549833.23-P1P2	GGAGCAACTAGTGCAGTCTC	4	Npl_-_153549776.23-P1P2|Npl_+_153549833.23-P1P2
Pin1	P1P2	Pin1_-_20651953.23-P1P2	GAGCCAATCGGCAGTGGTGT	3	Pin1_-_20651947.23-P1P2	GCAGACGAGCCAATCGGCAG	4	Pin1_-_20651953.23-P1P2|Pin1_-_20651947.23-P1P2
Fgfr2	P1P2	Fgfr2_-_130266462.23-P1P2	GGCCCCGCCGCGCTGCCCGC	3	Fgfr2_+_130266320.23-P1P2	GGGCGCCGCCGTCCAGGAAA	4	Fgfr2_-_130266462.23-P1P2|Fgfr2_+_130266320.23-P1P2
2410137M14Rik	P1P2	2410137M14Rik_-_36981419.23-P1P2	GGAGCCTAGGGGTGGTGCGG	3	2410137M14Rik_-_36981527.23-P1P2	GCTGGCAGAGGGTGTGTAGT	4	2410137M14Rik_-_36981419.23-P1P2|2410137M14Rik_-_36981527.23-P1P2
Bax	P1P2	Bax_+_45466969.23-P1P2	GTGGGCATCAGTTCGGATTA	3	Bax_-_45467045.23-P1P2	GTCTTCTTCCCATAGATTCA	4	Bax_+_45466969.23-P1P2|Bax_-_45467045.23-P1P2
Tcte1	P1P2	Tcte1_-_45523475.23-P1P2	GCGCCAACGCCCAGGGCGGA	3	Tcte1_-_45523468.23-P1P2	GAGGAGGGCGCCAACGCCCA	4	Tcte1_-_45523475.23-P1P2|Tcte1_-_45523468.23-P1P2
Ank1	P1P2	Ank1_-_23035017.23-P1P2	GGTAGACCCGGCCTTTGAGA	3	Ank1_+_23035093.23-P1P2	GCAACCAGAAAAGGCCTTAT	4	Ank1_-_23035017.23-P1P2|Ank1_+_23035093.23-P1P2
Gpr112	ENSMUST00000096431.3	Gpr112_-_56963032.23-ENSMUST00000096431.3	GGAATTGAGCGGCTGTTAAC	3	Gpr112_-_56963167.23-ENSMUST00000096431.3	GAAAGACATAGTGGGAATGA	4	Gpr112_-_56963032.23-ENSMUST00000096431.3|Gpr112_-_56963167.23-ENSMUST00000096431.3
Aqp1	P1P2	Aqp1_+_55336302.23-P1P2	GGCTGCGATGGATGCAGACA	3	Aqp1_+_55336194.23-P1P2	GCTGCCCAGCGTAAGGAGGC	4	Aqp1_+_55336302.23-P1P2|Aqp1_+_55336194.23-P1P2
Adh5	P1P2	Adh5_+_138442984.23-P1P2	GGGGCCTAATACCGGAAGGG	3	Adh5_-_138443002.23-P1P2	GGCCCCGCCCTTCCGGTATT	4	Adh5_+_138442984.23-P1P2|Adh5_-_138443002.23-P1P2
Pak3	P1	Pak3_-_143664283.23-P1	GGGTCCCCAGTAGCCCACTC	3	Pak3_-_143664362.23-P1	GTGACGTCATAGCATAGCTA	4	Pak3_-_143664283.23-P1|Pak3_-_143664362.23-P1
Krt33a	P1P2	Krt33a_+_100016349.23-P1P2	GGAGGTAAGGGAGTCTTCTG	3	Krt33a_-_100016378.23-P1P2	GGACTCCCTTACCTCATAAA	4	Krt33a_+_100016349.23-P1P2|Krt33a_-_100016378.23-P1P2
Commd10	P1P2	Commd10_+_46958744.23-P1P2	GCTGTGCGTTTAATTTCCGA	3	Commd10_+_46958810.23-P1P2	GGGCGCGCCTGACGGAAACC	4	Commd10_+_46958744.23-P1P2|Commd10_+_46958810.23-P1P2
Mast1	P1P2	Mast1_-_84937505.23-P1P2	GCGCCTGATGCCCTACCTGG	3	Mast1_+_84937471.23-P1P2	GCATCAGGCGTGCACACGGG	4	Mast1_-_84937505.23-P1P2|Mast1_+_84937471.23-P1P2
Pou1f1	P1P2	Pou1f1_+_65520340.23-P1P2	GGGTTATGACGTACAAAGTG	3	Pou1f1_-_65520393.23-P1P2	GTTGGGCACAGACAGTATTT	4	Pou1f1_+_65520340.23-P1P2|Pou1f1_-_65520393.23-P1P2
Col9a2	P1	Col9a2_+_121039470.23-P1	GCCCAGCTGGGAAGTCCCGG	3	Col9a2_+_121039460.23-P1	GAAGTCCCGGGGGCATCTCG	4	Col9a2_+_121039470.23-P1|Col9a2_+_121039460.23-P1
9130023H24Rik	P1P2	9130023H24Rik_+_128238331.23-P1P2	GCGGCGGAGCAGGGCGAGAA	3	9130023H24Rik_-_128238192.23-P1P2	GCTCGCGCAGCTCACGGCGG	4	9130023H24Rik_+_128238331.23-P1P2|9130023H24Rik_-_128238192.23-P1P2
Wdr19	P1P2	Wdr19_+_65199565.23-P1P2	GGGTGGGTAGAGTCACGTGA	3	Wdr19_+_65199489.23-P1P2	GCCTGAGCTCTGATTGGGTG	4	Wdr19_+_65199565.23-P1P2|Wdr19_+_65199489.23-P1P2
Kng2	P1P2	Kng2_+_23029110.23-P1P2	GCTCTTGTTCCATACCTGGC	3	Kng2_+_23029347.23-P1P2	GACAAGCAATATTGTGTGGT	4	Kng2_+_23029110.23-P1P2|Kng2_+_23029347.23-P1P2
Maff	P1P2	Maff_-_79347415.23-P1P2	GCTACAGCGGGGTCTACTGG	3	Maff_-_79347402.23-P1P2	GTGGCTGTGGGCTCCTACAG	4	Maff_-_79347415.23-P1P2|Maff_-_79347402.23-P1P2
Tpbpb	P1P2	Tpbpb_-_60904975.23-P1P2	GCCCCAGGCTCTAGGACTCC	3	Tpbpb_-_60905134.23-P1P2	GTGGGCTGCCGAAGAAGAAG	4	Tpbpb_-_60904975.23-P1P2|Tpbpb_-_60905134.23-P1P2
Banf1	P1P2	Banf1_-_5366846.23-P1P2	GCAGCGGCCCTTCCGGTCTG	3	Banf1_-_5366780.23-P1P2	GCACGGGGGTCGCTGTTTTC	4	Banf1_-_5366846.23-P1P2|Banf1_-_5366780.23-P1P2
Rbm47	P1P2	Rbm47_+_66054580.23-P1P2	GCCGAGCCAGGAGCCACGTA	3	Rbm47_-_66054607.23-P1P2	GGTGGCTCCTGGCTCGGCAT	4	Rbm47_+_66054580.23-P1P2|Rbm47_-_66054607.23-P1P2
Loxhd1	P1P2	Loxhd1_+_77281477.23-P1P2	GCCACTCCAAGGGCATGTAG	3	Loxhd1_-_77281445.23-P1P2	GTAGTGTGCAGTGCTCTCAT	4	Loxhd1_+_77281477.23-P1P2|Loxhd1_-_77281445.23-P1P2
Gpr111	P1P2	Gpr111_+_42742385.23-P1P2	GTGACTCGGGTAGACTTGCC	3	Gpr111_+_42742376.23-P1P2	GTAGACTTGCCAGGATGAGA	4	Gpr111_+_42742385.23-P1P2|Gpr111_+_42742376.23-P1P2
Cma2	P1P2	Cma2_+_55950596.23-P1P2	GAGGAAGAGATCACCATATG	3	Cma2_-_55950642.23-P1P2	GAGGACTGCCCACGAAGACC	4	Cma2_+_55950596.23-P1P2|Cma2_-_55950642.23-P1P2
Ttc8	P1P2	Ttc8_-_98920359.23-P1P2	GGCACGGAGGACCCTGTCCG	3	Ttc8_-_98920472.23-P1P2	GCAATTCTTTGCAAACTCTC	4	Ttc8_-_98920359.23-P1P2|Ttc8_-_98920472.23-P1P2
Vwa3b	P1P2	Vwa3b_-_37153634.23-P1P2	GAGAATTCCCCCATTTGCAG	3	Vwa3b_-_37153583.23-P1P2	GCTAGAGTAAATGATGTCTC	4	Vwa3b_-_37153634.23-P1P2|Vwa3b_-_37153583.23-P1P2
Nynrin	P1P2	Nynrin_+_55853985.23-P1P2	GCTGCTAAGGGTTGTAGCTA	3	Nynrin_-_55854136.23-P1P2	GGGCGCGCCTCAAGGAGGGG	4	Nynrin_+_55853985.23-P1P2|Nynrin_-_55854136.23-P1P2
[truncated: 21,737 more rows]

## Sheet: 5_6
gene	transcript	sgID_A	protospacer_A	rank_A	sgID_B	protospacer_B	rank_B	sgID_AB
[truncated: 22,033 more rows]
