# Supplementary material for: Maximizing CRISPRi efficacy and accessibility with dual-sgRNA libraries and optimal effectors
Source: eLife. 2022 Dec 28;11:e81856. doi: 10.7554/eLife.81856 (PMC9829409; doi:10.7554/eLife.81856)
Supplement: Supplementary file 12. [file elife-81856-supp12.csv]

gene	transcript	guide_type	gene_source	sgID_A	protospacer_A	phenotype_A	predictedRank_A	source_A	sgID_B	protospacer_B	phenotype_B	predictedRank_B	source_B	sgID_AB
EIF2S1	P1P2	1-2	essential	EIF2S1_-_67827085.23-P1P2	GAGCGCACGCTGAGGAGGAT	1.0	1.0	essential	EIF2S1_-_67827080.23-P1P2	CCTCAGCGTGCGCTTCGCTC	2.0	4.0	essential	EIF2S1_-_67827085.23-P1P2|EIF2S1_-_67827080.23-P1P2
NDUFB3	P1P2	1-2	nonessential	NDUFB3_-_201936802.23-P1P2	GGGTAAATTAGGGAGTTGGT	1.0	1.0	predicted	NDUFB3_-_201936782.23-P1P2	GACAGCAATCTGACCTCTCC	2.0	2.0	predicted	NDUFB3_-_201936802.23-P1P2|NDUFB3_-_201936782.23-P1P2
ACTR1B	P1P2	1-2	nonessential	ACTR1B_-_98280407.23-P1P2	GGCTGCAGGAGGCACCGGAT	1.0	1.0	predicted	ACTR1B_+_98280464.23-P1P2	CCCCGAGCCTGCAGCCTACC	2.0	2.0	predicted	ACTR1B_-_98280407.23-P1P2|ACTR1B_+_98280464.23-P1P2
KANSL1	P1P2	1-2	significant	KANSL1_-_44270236.23-P1P2	GGGATTCAGCCCCACAAAAT	1.0	9.0	empirical	KANSL1_-_44270717.23-P1P2	CCACCGCTCGCCGAGCCGGC	2.0	4.0	empirical	KANSL1_-_44270236.23-P1P2|KANSL1_-_44270717.23-P1P2
MRPS9	P1P2	1-2	essential	MRPS9_-_105654578.23-P1P2	GCGCCCTGTGTGTCCTACGG	1.0	4.0	essential	MRPS9_-_105654556.23-P1P2	CCATGTTAGCTGTGGGAGCC	2.0	3.0	essential	MRPS9_-_105654578.23-P1P2|MRPS9_-_105654556.23-P1P2
SMC1A	P1P2	1-2	essential	SMC1A_-_53449606.23-P1P2	GGCCGTACGCCCGAGAACTG	1.0	1.0	essential	SMC1A_+_53449593.23-P1P2	GAGAACTGAGGTAGCCCGCC	2.0	5.0	essential	SMC1A_-_53449606.23-P1P2|SMC1A_+_53449593.23-P1P2
RPS27A	P1P2	1-2	essential	RPS27A_-_55459862.23-P1P2	GGCGGTGGGTGTCTGCACTT	1.0	5.0	essential	RPS27A_+_55459832.23-P1P2	CCATCTGCGGTGGGTGTCTC	2.0	4.0	essential	RPS27A_-_55459862.23-P1P2|RPS27A_+_55459832.23-P1P2
KRT10	P2	1-2	nonessential	KRT10_+_38975898.23-P2	GCAGGCCCAGATATCCGCTC	1.0	1.0	predicted	KRT10_-_38975915.23-P2	AGATATCCGCTCTGGAAGAC	2.0	2.0	predicted	KRT10_+_38975898.23-P2|KRT10_-_38975915.23-P2
RPS11	P1P2	1-2	significant	RPS11_-_49999745.23-P1P2	GTCAGGTGCGGACTCGGGGT	1.0	8.0	empirical	RPS11_-_49999733.23-P1P2	CACCTGAATGTCCGCCATCC	2.0	3.0	empirical	RPS11_-_49999745.23-P1P2|RPS11_-_49999733.23-P1P2
SRSF6	P1	1-2	significant	SRSF6_+_42086965.23-P1	GGAGGGCCGGACAACCGCGG	1.0	2.0	empirical	SRSF6_-_42086572.23-P1	CACACCACAGGGGCGGCCGC	2.0	1.0	empirical	SRSF6_+_42086965.23-P1|SRSF6_-_42086572.23-P1
DKC1	P1P2	1-2	essential	DKC1_-_153991190.23-P1P2	GCCAAGGCGGCGGGAGTCTG	1.0	5.0	essential	DKC1_-_153991174.23-P1P2	TGGTCCCGTCAGGCCGCGCC	2.0	6.0	essential	DKC1_-_153991190.23-P1P2|DKC1_-_153991174.23-P1P2
DBF4	P1P2	1-2	significant	DBF4_-_87505724.23-P1P2	GGCGAGAAGGCAGGCACGAG	1.0	2.0	empirical	DBF4_+_87505889.23-P1P2	GACCTGCAGACGCGGTACCC	2.0	8.0	empirical	DBF4_-_87505724.23-P1P2|DBF4_+_87505889.23-P1P2
TIMELESS	P1P2	1-2	essential	TIMELESS_-_56842914.23-P1P2	GCCGGTGAGACCCGGGAACG	1.0	1.0	essential	TIMELESS_-_56842929.23-P1P2	TAGTCTCCCGCGCCGCGTTC	2.0	2.0	essential	TIMELESS_-_56842914.23-P1P2|TIMELESS_-_56842929.23-P1P2
IMPDH2	P1P2	1-2	essential	IMPDH2_+_49066798.23-P1P2	GGGTCCTCGGAGACACGCGG	1.0	1.0	essential	IMPDH2_+_49066801.23-P1P2	CGTGTCTCCGAGGACCGCGC	2.0	3.0	essential	IMPDH2_+_49066798.23-P1P2|IMPDH2_+_49066801.23-P1P2
TRIAP1	P1P2	1-2	significant	TRIAP1_+_120884159.23-P1P2	GGTCGCCATGAACAGTGTGG	1.0	3.0	empirical	TRIAP1_-_120884014.23-P1P2	CTGTTCCCAGGCCCTGCATC	2.0	9.0	empirical	TRIAP1_+_120884159.23-P1P2|TRIAP1_-_120884014.23-P1P2
REV3L	P1P2	1-2	significant	REV3L_+_111804354.23-P1P2	GGAGCCCGTGTGATTCCCGG	1.0	2.0	empirical	REV3L_-_111804372.23-P1P2	GTGTGATTCCCGGCGGTGGC	2.0	1.0	empirical	REV3L_+_111804354.23-P1P2|REV3L_-_111804372.23-P1P2
TONSL	P1P2	1-2	significant	TONSL_-_145669773.23-P1P2	GGGGGTCCCCGAGGAACTTA	1.0	3.0	empirical	TONSL_-_145669819.23-P1P2	GATCCCGCGGCGATCCGAGC	2.0	1.0	empirical	TONSL_-_145669773.23-P1P2|TONSL_-_145669819.23-P1P2
NAA20	P1P2	1-2	significant	NAA20_-_19998023.23-P1P2	GGGTCTTGGCGAACGGTCTT	1.0	1.0	empirical	NAA20_-_19998029.23-P1P2	CTTCCGAAGACCGTTCGCCC	2.0	6.0	empirical	NAA20_-_19998023.23-P1P2|NAA20_-_19998029.23-P1P2
EMC7	P1P2	1-2	significant	EMC7_+_34394068.23-P1P2	GGAGACTGGGAGGGCTTCCG	1.0	3.0	empirical	EMC7_-_34393868.23-P1P2	CAGGACTGGATCTCGGCGGC	2.0	6.0	empirical	EMC7_+_34394068.23-P1P2|EMC7_-_34393868.23-P1P2
NDC1	P1P2	1-2	significant	NDC1_-_54303966.23-P1P2	GCCCCTAGTCTAGGGCGTAC	1.0	5.0	empirical	NDC1_+_54303930.23-P1P2	TGGAGATGGCGGCCCCTAGC	2.0	3.0	empirical	NDC1_-_54303966.23-P1P2|NDC1_+_54303930.23-P1P2
POLR1B	P1P2	1-2	essential	POLR1B_-_113300081.23-P1P2	GCAGGTGGCCACATGGATCC	1.0	1.0	essential	POLR1B_+_113300085.23-P1P2	GTGGCGGAACCTGCCCAGCC	2.0	3.0	essential	POLR1B_-_113300081.23-P1P2|POLR1B_+_113300085.23-P1P2
EXOSC7	P1P2	1-2	significant	EXOSC7_-_45017818.23-P1P2	GAGAAGGTGTACATCGTGCA	1.0	2.0	empirical	EXOSC7_-_45017841.23-P1P2	CTGCTGTAGCTACCTGGACC	2.0	5.0	empirical	EXOSC7_-_45017818.23-P1P2|EXOSC7_-_45017841.23-P1P2
COPE	P1P2	1-2	nonessential	COPE_+_19030144.23-P1P2	GGACAGCGAAATGGCGCCTC	1.0	1.0	predicted	COPE_-_19030119.23-P1P2	GGGAGGTAGACGAGCTGTTC	2.0	2.0	predicted	COPE_+_19030144.23-P1P2|COPE_-_19030119.23-P1P2
DYNLL1	P1P2	1-2	significant	DYNLL1_-_120934043.23-P1P2	GAGAAACTCGGGGGGCCAGG	1.0	2.0	empirical	DYNLL1_-_120933933.23-P1P2	AAACCGTGGCGCATCTAAGC	2.0	1.0	empirical	DYNLL1_-_120934043.23-P1P2|DYNLL1_-_120933933.23-P1P2
SOD1	P1P2	1-2	significant	SOD1_+_33032480.23-P1P2	GAGGCACCACGACAGACCCG	1.0	7.0	empirical	SOD1_+_33032477.23-P1P2	CCGCGGGTCTGTCGTGGTGC	2.0	6.0	empirical	SOD1_+_33032480.23-P1P2|SOD1_+_33032477.23-P1P2
MRPL53	P1P2	1-2	significant	MRPL53_-_74699602.23-P1P2	GCGTCTGCAGGAAGGTCCTA	1.0	2.0	empirical	MRPL53_-_74699616.23-P1P2	CTGTTTTTCCACCGTAGGAC	2.0	5.0	empirical	MRPL53_-_74699602.23-P1P2|MRPL53_-_74699616.23-P1P2
MCM5	P1P2	1-2	significant	MCM5_-_35796550.23-P1P2	GGCGCTTCAAGGAGTTCCTG	1.0	4.0	empirical	MCM5_-_35796201.23-P1P2	CTGGTTTTCCGCACTTCACC	2.0	2.0	empirical	MCM5_-_35796550.23-P1P2|MCM5_-_35796201.23-P1P2
SEPHS2	P1P2	1-2	significant	SEPHS2_-_30457178.23-P1P2	GACTCAAGCCGTCAGACCCA	1.0	3.0	empirical	SEPHS2_+_30457164.23-P1P2	TCAGACCCACGGCATGCACC	2.0	4.0	empirical	SEPHS2_-_30457178.23-P1P2|SEPHS2_+_30457164.23-P1P2
TOMM22	P1P2	1-2	significant	TOMM22_+_39078005.23-P1P2	GGACTGGGGTTCCCCTGCAC	1.0	5.0	empirical	TOMM22_-_39078185.23-P1P2	CTTCGCTCCGATCCCGTACC	2.0	10.0	empirical	TOMM22_+_39078005.23-P1P2|TOMM22_-_39078185.23-P1P2
MSRB1	P1P2	1-2	nonessential	MSRB1_+_1993161.23-P1P2	GAAGCGCGCTGCGGTTCCGG	1.0	1.0	predicted	MSRB1_+_1993208.23-P1P2	ACCCGACGACCGCCGGTACC	2.0	2.0	predicted	MSRB1_+_1993161.23-P1P2|MSRB1_+_1993208.23-P1P2
BORA	P1P2	1-2	essential	BORA_+_73302094.23-P1P2	GCGACTCCAGGGAGCTCCGG	1.0	3.0	essential	BORA_-_73302125.23-P1P2	CCAGTACCGACTCCAGGGAC	2.0	4.0	essential	BORA_+_73302094.23-P1P2|BORA_-_73302125.23-P1P2
DHFR	P1P2	1-2	nonessential	DHFR_+_79950771.23-P1P2	GCAGAACCTACTATGTGCGG	1.0	1.0	predicted	DHFR_-_79950787.23-P1P2	ACTATGTGCGGCGGCAGCTC	2.0	2.0	predicted	DHFR_+_79950771.23-P1P2|DHFR_-_79950787.23-P1P2
HJURP	P1P2	1-2	essential	HJURP_+_234763174.23-P1P2	GCGCGCGAGGCCCTGCAGTC	1.0	9.0	essential	HJURP_+_234762977.23-P1P2	CACTCCGACACGCAGGCCTC	2.0	1.0	essential	HJURP_+_234763174.23-P1P2|HJURP_+_234762977.23-P1P2
MED29	P1P2	1-2	significant	MED29_-_39882017.23-P1P2	GGGGATGCTGAAAAGCAACG	1.0	7.0	empirical	MED29_-_39882278.23-P1P2	GTAGACTCTCCTTCAGCTGC	2.0	4.0	empirical	MED29_-_39882017.23-P1P2|MED29_-_39882278.23-P1P2
MCL1	P1P2	1-2	significant	MCL1_-_150552064.23-P1P2	GGAAGACCCCGACTCCTTAC	1.0	1.0	empirical	MCL1_+_150552050.23-P1P2	ACTCCTTACTGGAAGGAAGC	2.0	2.0	empirical	MCL1_-_150552064.23-P1P2|MCL1_+_150552050.23-P1P2
RBMX	P1P2	1-2	essential	RBMX_-_135962895.23-P1P2	GGCGCAACGAGGGCGAACAA	1.0	1.0	essential	RBMX_-_135962885.23-P1P2	TCGTTGCGCAGTAGTGCTAC	2.0	2.0	essential	RBMX_-_135962895.23-P1P2|RBMX_-_135962885.23-P1P2
EEF1B2	P1P2	1-2	nonessential	EEF1B2_+_207024362.23-P1P2	GGAACCAGCCCTAGAAGCGC	1.0	1.0	predicted	EEF1B2_+_207024400.23-P1P2	TGGAGGTACGAACTTAAGAC	2.0	2.0	predicted	EEF1B2_+_207024362.23-P1P2|EEF1B2_+_207024400.23-P1P2
CPNE7	P1P2	1-2	nonessential	CPNE7_+_89642219.23-P1P2	GCGCGGCGCCCGGGAAATGG	1.0	1.0	predicted	CPNE7_+_89642204.23-P1P2	CGCCTGGGCCGGCCACCATC	2.0	2.0	predicted	CPNE7_+_89642219.23-P1P2|CPNE7_+_89642204.23-P1P2
POLR2D	P2	1-2	essential	POLR2D_+_128605175.23-P2	GAGGGTCTTAACTCTTGTCC	1.0	1.0	predicted	POLR2D_+_128604811.23-P2	CAATACTTAGCACTTGTCCC	3.0	3.0	predicted	POLR2D_+_128605175.23-P2|POLR2D_+_128604811.23-P2
EIF4G1	P1P2	1-2	essential	EIF4G1_-_184032400.23-P1P2	GCTGTGCGGGGAGCCGGAAA	1.0	2.0	essential	EIF4G1_-_184032787.23-P1P2	TGGTGCCTGCGCCCGTGGGC	2.0	5.0	essential	EIF4G1_-_184032400.23-P1P2|EIF4G1_-_184032787.23-P1P2
DNAJA3	P1P2	1-2	essential	DNAJA3_+_4475898.23-P1P2	GACCACCAGCAACCAGCGTG	1.0	7.0	essential	DNAJA3_-_4475855.23-P1P2	CCCGGCTCTAGGTGGGCCTC	2.0	1.0	essential	DNAJA3_+_4475898.23-P1P2|DNAJA3_-_4475855.23-P1P2
GTF2H3	P1P2	1-2	significant	GTF2H3_-_124118399.23-P1P2	GTGCTCTGCGCTGAGGTGCT	1.0	7.0	empirical	GTF2H3_-_124118424.23-P1P2	CACCGTCTGAAACCATGGCC	2.0	4.0	empirical	GTF2H3_-_124118399.23-P1P2|GTF2H3_-_124118424.23-P1P2
PSAT1	P1P2	1-2	significant	PSAT1_-_80912059.23-P1P2	GCTGCAGACTCTCACCGCAG	1.0	1.0	empirical	PSAT1_+_80912504.23-P1P2	TCTCCTGGGCCGGTCCGGGC	2.0	6.0	empirical	PSAT1_-_80912059.23-P1P2|PSAT1_+_80912504.23-P1P2
CDC37	P1P2	1-2	nonessential	CDC37_+_10506514.23-P1P2	GGCACCCAATGCCTGGTCAG	1.0	1.0	predicted	CDC37_-_10506403.23-P1P2	ACCGGTCCCCTCCTCTGATC	2.0	2.0	predicted	CDC37_+_10506514.23-P1P2|CDC37_-_10506403.23-P1P2
RAN	P1P2	1-2	significant	RAN_+_131356632.23-P1P2	GGCGCCCGTCCGACTGAGGC	1.0	2.0	empirical	RAN_+_131356569.23-P1P2	CTGCTCTCGCGCCGGCGTCC	2.0	6.0	empirical	RAN_+_131356632.23-P1P2|RAN_+_131356569.23-P1P2
EIF3F	P1P2	1-2	significant	EIF3F_-_8009270.23-P1P2	GCGGGACCCTGTTGGGTGAG	1.0	3.0	empirical	EIF3F_+_8009255.23-P1P2	GTTGGGTGAGTGGTCAGAGC	2.0	6.0	empirical	EIF3F_-_8009270.23-P1P2|EIF3F_+_8009255.23-P1P2
ARGLU1	P1P2	1-2	significant	ARGLU1_+_107220466.23-P1P2	GGCCGCAGCTGCCATCTTAG	1.0	3.0	empirical	ARGLU1_-_107220477.23-P1P2	TCTTAGGGGCGCCTGGCGCC	2.0	4.0	empirical	ARGLU1_+_107220466.23-P1P2|ARGLU1_-_107220477.23-P1P2
MBTPS2	P1P2	1-2	significant	MBTPS2_-_21857794.23-P1P2	GGGCGCGCGCGGTCAGCTGT	1.0	1.0	empirical	MBTPS2_-_21857766.23-P1P2	CAGCATCCGCTCAGGAACCC	2.0	6.0	empirical	MBTPS2_-_21857794.23-P1P2|MBTPS2_-_21857766.23-P1P2
TSSK3	P1P2	1-2	nonessential	TSSK3_-_32828258.23-P1P2	GGAGTAGAGCTGCCTCTCAG	1.0	1.0	predicted	TSSK3_-_32828205.23-P1P2	AGGACTTCATCCGCAGCCGC	2.0	2.0	predicted	TSSK3_-_32828258.23-P1P2|TSSK3_-_32828205.23-P1P2
SF3A2	P1	1-2	essential	SF3A2_-_2236876.23-P1	GTGGAGGTGGCGAAACGAGG	1.0	2.0	essential	SF3A2_-_2236863.23-P1	CCTCCACGACTTCGTTTGGC	2.0	5.0	essential	SF3A2_-_2236876.23-P1|SF3A2_-_2236863.23-P1
PARN	P1P2	1-2	significant	PARN_+_14724082.23-P1P2	GGCGGCCGGCGTCACCGCTG	1.0	2.0	empirical	PARN_+_14724027.23-P1P2	CAGCGGTTCTACTCGCCGAC	2.0	3.0	empirical	PARN_+_14724082.23-P1P2|PARN_+_14724027.23-P1P2
POLR3H	P1P2	1-2	significant	POLR3H_+_41940181.23-P1P2	GCGACTGGGACGGGACCAAG	1.0	4.0	empirical	POLR3H_+_41940057.23-P1P2	AGGGGGGATCCGGACGGTGC	2.0	3.0	empirical	POLR3H_+_41940181.23-P1P2|POLR3H_+_41940057.23-P1P2
PHF12	P1P2	1-2	significant	PHF12_+_27278322.23-P1P2	GGATACCCCCAGCCCCGGGA	1.0	2.0	empirical	PHF12_+_27278232.23-P1P2	GGGGTCAGGCCTCGGCGGGC	2.0	10.0	empirical	PHF12_+_27278322.23-P1P2|PHF12_+_27278232.23-P1P2
URB2	P1P2	1-2	significant	URB2_-_229762001.23-P1P2	GGGACGCGGGACCCGTACAG	1.0	1.0	empirical	URB2_+_229762047.23-P1P2	CTGTCTACCCGGAGCTGTCC	2.0	2.0	empirical	URB2_-_229762001.23-P1P2|URB2_+_229762047.23-P1P2
NMT1	P1P2	1-2	nonessential	NMT1_-_43138703.23-P1P2	GCTCTCGCAACTCAAGATGG	1.0	1.0	predicted	NMT1_-_43138762.23-P1P2	TTCCATCATCTGCGGCAGCC	2.0	2.0	predicted	NMT1_-_43138703.23-P1P2|NMT1_-_43138762.23-P1P2
RPP38	P1P2	1-2	significant	RPP38_+_15139555.23-P1P2	GCTGGGCGGCCCAACCGGGA	1.0	4.0	empirical	RPP38_+_15139358.23-P1P2	GTGCTGTTGCCTTCAGGTGC	2.0	5.0	empirical	RPP38_+_15139555.23-P1P2|RPP38_+_15139358.23-P1P2
HAMP	P1P2	1-2	nonessential	HAMP_+_35771624.23-P1P2	GCTCCTCATCCACACCACGT	1.0	1.0	predicted	HAMP_+_35773493.23-P1P2	AGATCTGGGCCGCTTGCCTC	2.0	2.0	predicted	HAMP_+_35771624.23-P1P2|HAMP_+_35773493.23-P1P2
PSMD4	P1P2	1-2	essential	PSMD4_-_151227239.23-P1P2	GCCGTCCCGGAGACCCGGTC	1.0	1.0	essential	PSMD4_-_151227243.23-P1P2	TCCCGACCGGGTCTCCGGGC	2.0	5.0	essential	PSMD4_-_151227239.23-P1P2|PSMD4_-_151227243.23-P1P2
LARS	P1P2	1-2	significant	LARS_+_145561989.23-P1P2	GCGGACTGGCCAGTCTCTAG	1.0	1.0	empirical	LARS_-_145562203.23-P1P2	GATGATTGCCTCAGCAGGTC	2.0	5.0	empirical	LARS_+_145561989.23-P1P2|LARS_-_145562203.23-P1P2
XPO5	P1P2	1-2	significant	XPO5_+_43543679.23-P1P2	GGCCGCGGCCCGGTACCAAC	1.0	3.0	empirical	XPO5_-_43543686.23-P1P2	ACGGGTGGTCTCGCCGAGGC	2.0	1.0	empirical	XPO5_+_43543679.23-P1P2|XPO5_-_43543686.23-P1P2
COPS8	P1P2	1-2	significant	COPS8_-_237994589.23-P1P2	GGGCTGTCCGGACGGTGCAG	1.0	2.0	empirical	COPS8_-_237994564.23-P1P2	CAGACTGTCCCTCAGGCGTC	2.0	3.0	empirical	COPS8_-_237994589.23-P1P2|COPS8_-_237994564.23-P1P2
GNPNAT1	P1P2	1-2	significant	GNPNAT1_-_53258340.23-P1P2	GGCCTCTGCCCCCTCACGCA	1.0	5.0	empirical	GNPNAT1_-_53258358.23-P1P2	CTCGCCTGCGCGCGGCCCTC	2.0	1.0	empirical	GNPNAT1_-_53258340.23-P1P2|GNPNAT1_-_53258358.23-P1P2
GFER	P1P2	1-2	essential	GFER_-_2034253.23-P1P2	GGCGAGCGGGGCCGCTTCCA	1.0	1.0	essential	GFER_-_2034199.23-P1P2	GGTCAGCTCGGCCTCCAGAC	2.0	5.0	essential	GFER_-_2034253.23-P1P2|GFER_-_2034199.23-P1P2
EXOC8	P1P2	1-2	significant	EXOC8_-_231473564.23-P1P2	GGGCTGTCTAGACCCACCCA	1.0	2.0	empirical	EXOC8_-_231473581.23-P1P2	AGGAGCTCGGTTGGCCTTGC	2.0	1.0	empirical	EXOC8_-_231473564.23-P1P2|EXOC8_-_231473581.23-P1P2
NOP10	P1P2	1-2	essential	NOP10_+_34635309.23-P1P2	GCGGACCACTGCAGACTGAG	1.0	3.0	essential	NOP10_+_34635306.23-P1P2	CCGCTCAGTCTGCAGTGGTC	2.0	1.0	essential	NOP10_+_34635309.23-P1P2|NOP10_+_34635306.23-P1P2
ALG13	P1P2	1-2	significant	ALG13_+_110924898.23-P1P2	GCGACGTGCGGTCCACAGGG	1.0	10.0	empirical	ALG13_+_110924465.23-P1P2	TAGGGACCACCAGCTTTGAC	2.0	3.0	empirical	ALG13_+_110924898.23-P1P2|ALG13_+_110924465.23-P1P2
GNL3L	P1P2	1-2	essential	GNL3L_+_54556706.23-P1P2	GGCGGGGATCTGAGAAGCGA	1.0	1.0	essential	GNL3L_+_54556690.23-P1P2	AGTTGTCGTGTTGCCCTCGC	2.0	2.0	essential	GNL3L_+_54556706.23-P1P2|GNL3L_+_54556690.23-P1P2
PTK2	P1P2	1-2	significant	PTK2_-_142011343.23-P1P2	GCACAGTGGTCCGGGACCGG	1.0	1.0	empirical	PTK2_-_142011334.23-P1P2	GACCACTGTGAGCCCGCGGC	2.0	4.0	empirical	PTK2_-_142011343.23-P1P2|PTK2_-_142011334.23-P1P2
DOLK	P1P2	1-2	nonessential	DOLK_+_131709816.23-P1P2	GGCGGCTGTAACTGTGAGGA	1.0	1.0	predicted	DOLK_-_131709668.23-P1P2	CCCTCTGCTTGACGGGGCTC	2.0	2.0	predicted	DOLK_+_131709816.23-P1P2|DOLK_-_131709668.23-P1P2
TMSB10	P1P2	1-2	significant	TMSB10_-_85132984.23-P1P2	GGCCCTGGGACCGAGAAGAG	1.0	2.0	empirical	TMSB10_+_85133250.23-P1P2	CGGTCTCCCGCGCCCCAGCC	2.0	2.0	empirical	TMSB10_-_85132984.23-P1P2|TMSB10_+_85133250.23-P1P2
CYP4F11	P1P2	1-2	nonessential	CYP4F11_+_16045652.23-P1P2	GGGCAAAGACCTCCTAGCAG	1.0	1.0	predicted	CYP4F11_-_16045665.23-P1P2	CCTAGCAGAGGGGGAGAGGC	2.0	2.0	predicted	CYP4F11_+_16045652.23-P1P2|CYP4F11_-_16045665.23-P1P2
HIST1H2BC	P1P2	1-2	nonessential	HIST1H2BC_-_26124168.23-P1P2	GATGTGTCGAAAGTAAAGAG	1.0	1.0	predicted	HIST1H2BC_-_26124187.23-P1P2	TATAAGTAGCAGAAATCCGC	2.0	2.0	predicted	HIST1H2BC_-_26124168.23-P1P2|HIST1H2BC_-_26124187.23-P1P2
GTF3A	P1P2	1-2	significant	GTF3A_-_27998904.23-P1P2	GCCGGCCGTGGTCGCCGAGT	1.0	1.0	empirical	GTF3A_-_27998788.23-P1P2	TGCTGAACCTTCGCGCGACC	2.0	2.0	empirical	GTF3A_-_27998904.23-P1P2|GTF3A_-_27998788.23-P1P2
TSEN2	P1P2	1-2	essential	TSEN2_-_12526016.23-P1P2	GGAGCGCGTGGGGCCAAGAA	1.0	1.0	essential	TSEN2_-_12525993.23-P1P2	TTACCCCGGCAACGCCGGCC	2.0	2.0	essential	TSEN2_-_12526016.23-P1P2|TSEN2_-_12525993.23-P1P2
TBC1D28	ENST00000345096.4	1-2	nonessential	TBC1D28_-_18545637.23-ENST00000345096.4	GATCAGTGACCTCCTCCTGT	1.0	1.0	predicted	TBC1D28_+_18545467.23-ENST00000345096.4	AGCCTCTTTGACCAGGAGAC	2.0	2.0	predicted	TBC1D28_-_18545637.23-ENST00000345096.4|TBC1D28_+_18545467.23-ENST00000345096.4
CNOT3	P1P2	1-2	significant	CNOT3_+_54641532.23-P1P2	GGACGGGGGTCGGGGCTCAA	1.0	2.0	empirical	CNOT3_-_54641691.23-P1P2	CTGAGGAGCGTATCGCGACC	2.0	1.0	empirical	CNOT3_+_54641532.23-P1P2|CNOT3_-_54641691.23-P1P2
FGFR1OP	P1P2	1-2	significant	FGFR1OP_+_167413231.23-P1P2	GCCCCCACGGAATGAGGCAG	1.0	8.0	empirical	FGFR1OP_-_167412853.23-P1P2	CAGCAGGGTACGCTCCGCGC	2.0	5.0	empirical	FGFR1OP_+_167413231.23-P1P2|FGFR1OP_-_167412853.23-P1P2
MTBP	P1P2	1-2	significant	MTBP_-_121457707.23-P1P2	GAGTTGGGGGGTGATCTCTG	1.0	3.0	empirical	MTBP_-_121457873.23-P1P2	CTCTCCACAAGCCGTTCCCC	2.0	6.0	empirical	MTBP_-_121457707.23-P1P2|MTBP_-_121457873.23-P1P2
PSMG3	P1	1-2	significant	PSMG3_-_1609603.23-P1	GGAGGCCGGCCGGGCTACTG	1.0	3.0	empirical	PSMG3_+_1609624.23-P1	CGGGTACCCGCGCTCACCAC	2.0	4.0	empirical	PSMG3_-_1609603.23-P1|PSMG3_+_1609624.23-P1
ELOVL1	P1P2	1-2	significant	ELOVL1_-_43833593.23-P1P2	GGGTCCAGACTCACCCGTAG	1.0	6.0	empirical	ELOVL1_-_43833608.23-P1P2	TTGCCCGCCTGGCCCCTACC	2.0	3.0	empirical	ELOVL1_-_43833593.23-P1P2|ELOVL1_-_43833608.23-P1P2
VPS33A	P1P2	1-2	significant	VPS33A_+_122750974.23-P1P2	GGGACTCGGTTGGCGTTGTG	1.0	4.0	empirical	VPS33A_+_122750997.23-P1P2	GTTCCTACGGGAGGACCACC	2.0	6.0	empirical	VPS33A_+_122750974.23-P1P2|VPS33A_+_122750997.23-P1P2
LAMTOR4	P1P2	1-2	significant	LAMTOR4_+_99746556.23-P1P2	GGGGGAGCTCCCTACCAGAT	1.0	4.0	empirical	LAMTOR4_-_99746568.23-P1P2	ACCAGATAGGTAGCTTCCGC	2.0	1.0	empirical	LAMTOR4_+_99746556.23-P1P2|LAMTOR4_-_99746568.23-P1P2
TINF2	P1P2	1-2	significant	TINF2_+_24711802.23-P1P2	GACCCTCGGGCTCGAGACAG	1.0	1.0	empirical	TINF2_+_24711839.23-P1P2	CTACTAGCTTCCCTTGCCCC	2.0	4.0	empirical	TINF2_+_24711802.23-P1P2|TINF2_+_24711839.23-P1P2
WDR3	P1P2	1-2	essential	WDR3_-_118472399.23-P1P2	GTCGGCTGGGAGCCTCGTGG	1.0	3.0	essential	WDR3_+_118472389.23-P1P2	CGTGGAGGCTGAGGTGAGTC	2.0	2.0	essential	WDR3_-_118472399.23-P1P2|WDR3_+_118472389.23-P1P2
XRCC2	P1P2	1-2	significant	XRCC2_-_152373149.23-P1P2	GGGTCCCAGACTCAGCCCTA	1.0	4.0	empirical	XRCC2_-_152373174.23-P1P2	TCGGGGCGATGTGTAGTGCC	2.0	1.0	empirical	XRCC2_-_152373149.23-P1P2|XRCC2_-_152373174.23-P1P2
MED9	P1P2	1-2	essential	MED9_-_17380350.23-P1P2	GCCTCTGGCTAACCTACCCC	1.0	5.0	essential	MED9_-_17380394.23-P1P2	CCGCCTGTCGCCCGGCTGCC	2.0	7.0	essential	MED9_-_17380350.23-P1P2|MED9_-_17380394.23-P1P2
USP9X	P1P2	1-2	significant	USP9X_+_40945320.23-P1P2	GTCACAACCAGGGCACACGG	1.0	3.0	empirical	USP9X_-_40944738.23-P1P2	CGGATGCCCGTCCTCGTCAC	2.0	1.0	empirical	USP9X_+_40945320.23-P1P2|USP9X_-_40944738.23-P1P2
NSRP1	P1P2	1-2	essential	NSRP1_-_28443894.23-P1P2	GGGCAGGCAGTGAGTGATCC	1.0	5.0	essential	NSRP1_-_28443874.23-P1P2	GGAATCGCCATCTTGCTCCC	2.0	3.0	essential	NSRP1_-_28443894.23-P1P2|NSRP1_-_28443874.23-P1P2
ATF5	P1P2	1-2	essential	ATF5_+_50432696.23-P1P2	GAGGGCCACGAGCTGCGAAA	1.0	7.0	essential	ATF5_+_50432424.23-P1P2	GTATATATCTGTCCCCAGTC	2.0	1.0	essential	ATF5_+_50432696.23-P1P2|ATF5_+_50432424.23-P1P2
RPAP2	P1P2	1-2	essential	RPAP2_-_92764613.23-P1P2	GGCCGGAGCGTGTCCCCGTC	1.0	6.0	essential	RPAP2_+_92764606.23-P1P2	TCCGGCAGACTACTCTCCCC	2.0	1.0	essential	RPAP2_-_92764613.23-P1P2|RPAP2_+_92764606.23-P1P2
ZBTB11	P1P2	1-2	nonessential	ZBTB11_-_101395936.23-P1P2	GCGGGCGAGTTGGTAACCAG	1.0	1.0	predicted	ZBTB11_+_101395930.23-P1P2	GGGGGAACTGCACTTCTCCC	2.0	2.0	predicted	ZBTB11_-_101395936.23-P1P2|ZBTB11_+_101395930.23-P1P2
PAFAH1B1	P1P2	1-2	significant	PAFAH1B1_-_2497388.23-P1P2	GACCCGGCGGCCTGACGATG	1.0	4.0	empirical	PAFAH1B1_-_2497281.23-P1P2	CCGCAGGGCCTCTTCCGTCC	2.0	1.0	empirical	PAFAH1B1_-_2497388.23-P1P2|PAFAH1B1_-_2497281.23-P1P2
DDX55	P1P2	1-2	significant	DDX55_+_124086731.23-P1P2	GCCTGCGGGTGCAGCGGCAC	1.0	7.0	empirical	DDX55_-_124086680.23-P1P2	CGTCGGTCGCCGCTGCTCGC	2.0	4.0	empirical	DDX55_+_124086731.23-P1P2|DDX55_-_124086680.23-P1P2
NRBP1	P1P2	1-2	significant	NRBP1_-_27651525.23-P1P2	GCTGCGGAGCGCAGCTGTGA	1.0	2.0	empirical	NRBP1_-_27651543.23-P1P2	CGGATCACAGCGACTCCCTC	2.0	1.0	empirical	NRBP1_-_27651525.23-P1P2|NRBP1_-_27651543.23-P1P2
MFN2	P2	1-2	significant	MFN2_-_12042038.23-P2	GTCTAATAAGTCAGGACTGG	1.0	1.0	predicted	MFN2_+_12042061.23-P2	ACCTCAACCTGAGACAGGAC	2.0	2.0	predicted	MFN2_-_12042038.23-P2|MFN2_+_12042061.23-P2
COG8	P1P2	1-2	essential	COG8_+_69373427.23-P1P2	GACCGCGGCGACTATCCCAT	1.0	1.0	essential	COG8_-_69373434.23-P1P2	ATCGGTAGCCACGGCCACAC	2.0	2.0	essential	COG8_+_69373427.23-P1P2|COG8_-_69373434.23-P1P2
SOD2	P1P2	1-2	significant	SOD2_+_160114265.23-P1P2	GGGCGCAGGAGCGGCACTCG	1.0	1.0	empirical	SOD2_+_160114227.23-P1P2	CCGATCTGCTGAAGCCGCTC	2.0	3.0	empirical	SOD2_+_160114265.23-P1P2|SOD2_+_160114227.23-P1P2
LYRM4	P1P2	1-2	nonessential	LYRM4_-_5260892.23-P1P2	GCTGGGTCACCTGTAATTGT	1.0	1.0	predicted	LYRM4_+_5260749.23-P1P2	GTCCTTGCCTCGCAGCCGCC	2.0	2.0	predicted	LYRM4_-_5260892.23-P1P2|LYRM4_+_5260749.23-P1P2
PSMD14	P1P2	1-2	significant	PSMD14_+_162165011.23-P1P2	GCAGCGGCGCACACCCGACG	1.0	3.0	empirical	PSMD14_+_162165252.23-P1P2	TCATTCTCTTCGCCTGCTCC	2.0	7.0	empirical	PSMD14_+_162165011.23-P1P2|PSMD14_+_162165252.23-P1P2
ACTL6A	P1P2	1-2	significant	ACTL6A_-_179280784.23-P1P2	GGGGTGGCGGTGGAAGTTAA	1.0	5.0	empirical	ACTL6A_+_179280755.23-P1P2	GAGGTGGGTGGCGGTGGAAC	2.0	4.0	empirical	ACTL6A_-_179280784.23-P1P2|ACTL6A_+_179280755.23-P1P2
N6AMT1	P1P2	1-2	significant	N6AMT1_+_30257657.23-P1P2	GCAGCGAAGGACTATGGCAG	1.0	3.0	empirical	N6AMT1_-_30257642.23-P1P2	TTCCACGGGCACGTGGGCCC	2.0	1.0	empirical	N6AMT1_+_30257657.23-P1P2|N6AMT1_-_30257642.23-P1P2
THG1L	P1P2	1-2	essential	THG1L_-_157158658.23-P1P2	GCGGTGAGCGAGCTCGACTC	1.0	3.0	essential	THG1L_-_157158472.23-P1P2	TAACTTTACAGGCGCCCCAC	2.0	1.0	essential	THG1L_-_157158658.23-P1P2|THG1L_-_157158472.23-P1P2
DDX5	P1P2	1-2	significant	DDX5_-_62502405.23-P1P2	GAGACCGGTAGAAATGAATG	1.0	3.0	empirical	DDX5_+_62502182.23-P1P2	AAACTCACCCTCGGTCCCGC	2.0	6.0	empirical	DDX5_-_62502405.23-P1P2|DDX5_+_62502182.23-P1P2
TMED2	P1P2	1-2	significant	TMED2_-_124069104.23-P1P2	GTAGGCGGCGGTGGCTGAGA	1.0	5.0	empirical	TMED2_-_124069112.23-P1P2	CGCTGCCTTCTCAGCCACCC	2.0	3.0	empirical	TMED2_-_124069104.23-P1P2|TMED2_-_124069112.23-P1P2
C1QTNF4	P1P2	1-2	nonessential	C1QTNF4_-_47615942.23-P1P2	GAGGGAAGGTCAGCTAGAGA	1.0	1.0	predicted	C1QTNF4_-_47615924.23-P1P2	TTTCCCTCACGCCTCCCCAC	2.0	2.0	predicted	C1QTNF4_-_47615942.23-P1P2|C1QTNF4_-_47615924.23-P1P2
ORC3	P1P2	1-2	significant	ORC3_-_88299910.23-P1P2	GGCTACGTCCTCGATGTCTA	1.0	1.0	empirical	ORC3_-_88299920.23-P1P2	CCACATACCTTAGACATCGC	2.0	3.0	empirical	ORC3_-_88299910.23-P1P2|ORC3_-_88299920.23-P1P2
DCTN6	P1P2	1-2	significant	DCTN6_+_30013892.23-P1P2	GAGTCTTCTCCGCCATGGTA	1.0	5.0	empirical	DCTN6_-_30013902.23-P1P2	TGGTACGGCCCCAATTGGAC	2.0	4.0	empirical	DCTN6_+_30013892.23-P1P2|DCTN6_-_30013902.23-P1P2
THOC7	P1P2	1-2	significant	THOC7_-_63849512.23-P1P2	GGCGGCGGCGCAAGCTGAGG	1.0	1.0	empirical	THOC7_-_63849519.23-P1P2	ACCGCCGCCTCAGCTTGCGC	2.0	2.0	empirical	THOC7_-_63849512.23-P1P2|THOC7_-_63849519.23-P1P2
SUPV3L1	P1P2	1-2	essential	SUPV3L1_+_70940042.23-P1P2	GGCACGGGAGAAGGACATCG	1.0	1.0	essential	SUPV3L1_+_70940020.23-P1P2	GACAGTGTAGAACCTGCGGC	2.0	2.0	essential	SUPV3L1_+_70940042.23-P1P2|SUPV3L1_+_70940020.23-P1P2
LSG1	P1P2	1-2	significant	LSG1_-_194392885.23-P1P2	GACCGGCCGGGGCTCTCCTC	1.0	2.0	empirical	LSG1_+_194392901.23-P1P2	CTGGACGAAGCTTCCCGGCC	2.0	3.0	empirical	LSG1_-_194392885.23-P1P2|LSG1_+_194392901.23-P1P2
RPS3	P2	1-2	essential	RPS3_+_75111893.23-P2	GTAGCATTTATAACAATTAT	1.0	2.0	empirical	RPS3_-_75111920.23-P2	ACTTAGCATTTATAACAATC	2.0	4.0	empirical	RPS3_+_75111893.23-P2|RPS3_-_75111920.23-P2
RBM8A	P1P2	1-2	essential	RBM8A_-_145507619.23-P1P2	GCCTCTGCGACAGTTTCCCG	1.0	2.0	essential	RBM8A_+_145507591.23-P1P2	TTCCCCTCTGCGACAGTTTC	2.0	3.0	essential	RBM8A_-_145507619.23-P1P2|RBM8A_+_145507591.23-P1P2
MRPL33	P1P2	1-2	essential	MRPL33_-_27994633.23-P1P2	GCCGGTGACGGAGACTGCCC	1.0	2.0	essential	MRPL33_-_27994638.23-P1P2	CACCTGGGCAGTCTCCGTCC	2.0	5.0	essential	MRPL33_-_27994633.23-P1P2|MRPL33_-_27994638.23-P1P2
BANP	P1P2	1-2	significant	BANP_+_87985113.23-P1P2	GGGAGCTGCAATTACCGTGT	1.0	1.0	empirical	BANP_+_87985096.23-P1P2	CGAGAATTCCGCAGCCCACC	2.0	3.0	empirical	BANP_+_87985113.23-P1P2|BANP_+_87985096.23-P1P2
CFDP1	P1	1-2	significant	CFDP1_+_75467325.23-P1	GCGCCGCCGCCGGGGCTCTA	1.0	6.0	empirical	CFDP1_-_75467319.23-P1	TAGAGCTTTGCCGTTGGAGC	2.0	4.0	empirical	CFDP1_+_75467325.23-P1|CFDP1_-_75467319.23-P1
SPCS3	P1	1-2	significant	SPCS3_+_177241168.23-P1	GACCCAGGCTCCCGTTCCGG	1.0	3.0	empirical	SPCS3_+_177241171.23-P1	GAACGGGAGCCTGGGTGTGC	2.0	2.0	empirical	SPCS3_+_177241168.23-P1|SPCS3_+_177241171.23-P1
KPNB1	P1P2	1-2	significant	KPNB1_+_45727288.23-P1P2	GGAGTGAGAGGCGGCGCGCA	1.0	1.0	empirical	KPNB1_+_45727339.23-P1P2	CCCGAGCACCAGCGCGCTCC	2.0	5.0	empirical	KPNB1_+_45727288.23-P1P2|KPNB1_+_45727339.23-P1P2
HMGB1	P2	1-2	nonessential	HMGB1_-_31191681.23-P2	GACCACGCTCGCGCGGACCA	1.0	1.0	predicted	HMGB1_-_31191644.23-P2	GGGGTGACCCGCGGAGGTGC	2.0	2.0	predicted	HMGB1_-_31191681.23-P2|HMGB1_-_31191644.23-P2
ZNF718	ENST00000502662.1	1-2	nonessential	ZNF718_-_154794.23-ENST00000502662.1	GCAAAAGGACATGAGAAACG	1.0	1.0	predicted	ZNF718_-_154974.23-ENST00000502662.1	GTATATCTTATCTTATCTTC	2.0	2.0	predicted	ZNF718_-_154794.23-ENST00000502662.1|ZNF718_-_154974.23-ENST00000502662.1
DYNC1H1	P1P2	1-2	essential	DYNC1H1_+_102430877.23-P1P2	GGGAGCCGGCTCCGCCCTAA	1.0	2.0	essential	DYNC1H1_+_102430905.23-P1P2	CAGTCTGCGGTGGGCTAGCC	2.0	7.0	essential	DYNC1H1_+_102430877.23-P1P2|DYNC1H1_+_102430905.23-P1P2
INTS9	P1P2	1-2	significant	INTS9_+_28747443.23-P1P2	GGCACCGGAAGACGCTTCCT	1.0	1.0	empirical	INTS9_-_28747461.23-P1P2	GAAGACGCTTCCTGGGTTTC	2.0	10.0	empirical	INTS9_+_28747443.23-P1P2|INTS9_-_28747461.23-P1P2
NR2C2AP	P1P2	1-2	significant	NR2C2AP_+_19314199.23-P1P2	GGGTTCCGGGTCCCAAGATT	1.0	2.0	empirical	NR2C2AP_-_19313951.23-P1P2	CCCTGTAGCTTGAGGAGGCC	2.0	3.0	empirical	NR2C2AP_+_19314199.23-P1P2|NR2C2AP_-_19313951.23-P1P2
DNAJC9	P1P2	1-2	significant	DNAJC9_-_75006969.23-P1P2	GCCGGGCGGAGATACGACCC	1.0	4.0	empirical	DNAJC9_+_75007004.23-P1P2	AGGACTGCTTCTTTTTCGCC	2.0	6.0	empirical	DNAJC9_-_75006969.23-P1P2|DNAJC9_+_75007004.23-P1P2
CCDC84	P1P2	1-2	essential	CCDC84_-_118868873.23-P1P2	GCCGCCGGATGGCGTAGGAT	1.0	2.0	essential	CCDC84_-_118868904.23-P1P2	GGGTACCCGGTATCACCACC	2.0	4.0	essential	CCDC84_-_118868873.23-P1P2|CCDC84_-_118868904.23-P1P2
PSMB6	P2	1-2	essential	PSMB6_+_4700842.23-P2	GCTGTGGAAACCGAGCTGGT	1.0	1.0	predicted	PSMB6_+_4700995.23-P2	CTGGTCCACACAGCAGCCAC	2.0	2.0	predicted	PSMB6_+_4700842.23-P2|PSMB6_+_4700995.23-P2
TUBGCP4	P1P2	1-2	significant	TUBGCP4_-_43663451.23-P1P2	GCACAAACCGCCCGACCCAG	1.0	1.0	empirical	TUBGCP4_+_43663480.23-P1P2	CTCGTGGTCGCCTGGAGGTC	2.0	7.0	empirical	TUBGCP4_-_43663451.23-P1P2|TUBGCP4_+_43663480.23-P1P2
TSFM	P1P2	1-2	significant	TSFM_-_58176641.23-P1P2	GGCGCGGACCGGGAGCTACC	1.0	1.0	empirical	TSFM_+_58176556.23-P1P2	GAGGGTGTTTATCGCGGCTC	2.0	9.0	empirical	TSFM_-_58176641.23-P1P2|TSFM_+_58176556.23-P1P2
UBL5	P1P2	1-2	significant	UBL5_-_9938639.23-P1P2	GGGTGAGGAGCTGGTGGCGT	1.0	2.0	empirical	UBL5_+_9938801.23-P1P2	CGGGGTTCGCGGCCCTGGGC	2.0	4.0	empirical	UBL5_-_9938639.23-P1P2|UBL5_+_9938801.23-P1P2
IK	P1	1-2	essential	IK_+_140027496.23-P1	GGAGCCTTACTATCTCGCTC	1.0	6.0	essential	IK_-_140027453.23-P1	ACAGCAACACCGCAGCGACC	2.0	3.0	essential	IK_+_140027496.23-P1|IK_-_140027453.23-P1
NDUFAF7	P1P2	1-2	significant	NDUFAF7_+_37458807.23-P1P2	GCTCGCTCCGCCAGGAGCTG	1.0	4.0	empirical	NDUFAF7_-_37458865.23-P1P2	CAGCAGTACACTCATGCTGC	2.0	6.0	empirical	NDUFAF7_+_37458807.23-P1P2|NDUFAF7_-_37458865.23-P1P2
TAF1D	P2	1-2	significant	TAF1D_-_93471390.23-P2	GTATCTATTAGTGAGTATAT	1.0	1.0	predicted	TAF1D_+_93471338.23-P2	GATCCTCTGCTTCTAAATTC	2.0	2.0	predicted	TAF1D_-_93471390.23-P2|TAF1D_+_93471338.23-P2
NOC4L	P1P2	1-2	significant	NOC4L_+_132629017.23-P1P2	GCTCCATGCCGCCCCCAACA	1.0	3.0	empirical	NOC4L_+_132629052.23-P1P2	CGGGAGTTCGCCGGGCTCTC	2.0	4.0	empirical	NOC4L_+_132629017.23-P1P2|NOC4L_+_132629052.23-P1P2
KRT17	P1P2	1-2	nonessential	KRT17_+_39780834.23-P1P2	GAAAGGAAGCGGGCGAACCC	1.0	1.0	predicted	KRT17_-_39780860.23-P1P2	ATAAAGGAAGCGGGCGAACC	2.0	2.0	predicted	KRT17_+_39780834.23-P1P2|KRT17_-_39780860.23-P1P2
SNRNP27	P1P2	1-2	significant	SNRNP27_-_70121148.23-P1P2	GTCGCAGCCGCTCTCCACGG	1.0	3.0	empirical	SNRNP27_+_70121140.23-P1P2	CGGAGGGGTGAGTCCTGTAC	2.0	1.0	empirical	SNRNP27_-_70121148.23-P1P2|SNRNP27_+_70121140.23-P1P2
COX6C	P1P2	1-2	significant	COX6C_-_100905842.23-P1P2	GCAACCCGCAGTGTCGGGGT	1.0	4.0	empirical	COX6C_-_100905522.23-P1P2	CGGTGTTTCTCCCGTGAGAC	2.0	4.0	empirical	COX6C_-_100905842.23-P1P2|COX6C_-_100905522.23-P1P2
TMEM199	P1P2	1-2	nonessential	TMEM199_+_26684570.23-P1P2	GTGGGACCAGGCGGGCCAAG	1.0	1.0	predicted	TMEM199_-_26684696.23-P1P2	TATCTAGCCGGCTCTCCGGC	2.0	2.0	predicted	TMEM199_+_26684570.23-P1P2|TMEM199_-_26684696.23-P1P2
ZNF830	P1P2	1-2	essential	ZNF830_-_33288620.23-P1P2	GCTCCGCCCGGACTCCGGCA	1.0	3.0	essential	ZNF830_+_33288601.23-P1P2	CCCGGACTCCGGCAGGGAAC	2.0	1.0	essential	ZNF830_-_33288620.23-P1P2|ZNF830_+_33288601.23-P1P2
RPS17	ENST00000330339.7	1-2	significant	RPS17_-_82824897.23-ENST00000330339.7	GGCGAAGCCTGTTAAAGCTT	1.0	8.0	empirical	RPS17_+_82824718.23-ENST00000330339.7	GACAGGGCTCTGCGCCTTCC	2.0	2.0	empirical	RPS17_-_82824897.23-ENST00000330339.7|RPS17_+_82824718.23-ENST00000330339.7
POLR3E	P1P2	1-2	nonessential	POLR3E_+_22308794.23-P1P2	GTACCCGCGGGCTGCAGAGA	1.0	1.0	predicted	POLR3E_-_22308778.23-P1P2	CTCAGGCGGCGGCCATGTTC	2.0	2.0	predicted	POLR3E_+_22308794.23-P1P2|POLR3E_-_22308778.23-P1P2
ZNF718	ENST00000510175.1,ENST00000511079.1,ENST00000513304.1,ENST00000513889.1	1-2	nonessential	ZNF718_+_124420.23-ENST00000510175.1,ENST00000511079.1,ENST00000513304.1,ENST00000513889.1	GGAGCGGGAGCAGAGCGATG	1.0	1.0	predicted	ZNF718_+_124436.23-ENST00000510175.1,ENST00000511079.1,ENST00000513304.1,ENST00000513889.1	CTCCTTAGGGAAGCCTCGGC	2.0	2.0	predicted	ZNF718_+_124420.23-ENST00000510175.1,ENST00000511079.1,ENST00000513304.1,ENST00000513889.1|ZNF718_+_124436.23-ENST00000510175.1,ENST00000511079.1,ENST00000513304.1,ENST00000513889.1
RACGAP1	P1P2	1-2	essential	RACGAP1_-_50419239.23-P1P2	GCGCTCCGCGCCTCACCCAA	1.0	2.0	essential	RACGAP1_+_50419209.23-P1P2	TCACTTCGCTCCGCGCCTCC	2.0	1.0	essential	RACGAP1_-_50419239.23-P1P2|RACGAP1_+_50419209.23-P1P2
CCNK	P1	1-2	significant	CCNK_-_99947816.23-P1	GGGGGCTTGCCTGAAGCGAG	1.0	8.0	empirical	CCNK_-_99947838.23-P1	TCAGTCGGTGGGTCACTCAC	2.0	2.0	empirical	CCNK_-_99947816.23-P1|CCNK_-_99947838.23-P1
WDR24	P1P2	1-2	significant	WDR24_-_740276.23-P1P2	GGTTCCTGGGAGCGGCGCAG	1.0	1.0	empirical	WDR24_-_740033.23-P1P2	CTGCTGGGATTGACTGACCC	2.0	9.0	empirical	WDR24_-_740276.23-P1P2|WDR24_-_740033.23-P1P2
HGS	P1P2	1-2	significant	HGS_-_79651112.23-P1P2	GTCGCCATGGGGCGAGGCAG	1.0	4.0	empirical	HGS_-_79651070.23-P1P2	CGGGCGCTCCCCTGCTACGC	2.0	3.0	empirical	HGS_-_79651112.23-P1P2|HGS_-_79651070.23-P1P2
LUC7L3	P1P2	1-2	significant	LUC7L3_-_48796990.23-P1P2	GTCGGCTCCTGTGTGTAGGA	1.0	1.0	empirical	LUC7L3_+_48797010.23-P1P2	AGGAGATTGGCGACGGTGTC	2.0	6.0	empirical	LUC7L3_-_48796990.23-P1P2|LUC7L3_+_48797010.23-P1P2
INO80B	P1P2	1-2	significant	INO80B_-_74682266.23-P1P2	GGAGTAAGCTGTGGCGGCGT	1.0	3.0	empirical	INO80B_-_74682279.23-P1P2	CAGAGGTGCTCCCACGCCGC	2.0	1.0	empirical	INO80B_-_74682266.23-P1P2|INO80B_-_74682279.23-P1P2
RPL10	P1P2	1-2	essential	RPL10_-_153626730.23-P1P2	GAGGAGCGCCTCTTTCCCTT	1.0	1.0	essential	RPL10_-_153626735.23-P1P2	CACCGAAGGGAAAGAGGCGC	2.0	2.0	essential	RPL10_-_153626730.23-P1P2|RPL10_-_153626735.23-P1P2
RRP12	P1P2	1-2	essential	RRP12_+_99161057.23-P1P2	GGGCTACAGGGTATCCACGT	1.0	2.0	essential	RRP12_-_99161036.23-P1P2	TGGAAGCCGGTCATTTAAGC	2.0	4.0	essential	RRP12_+_99161057.23-P1P2|RRP12_-_99161036.23-P1P2
ZNF253	P1P2	1-2	nonessential	ZNF253_-_19976741.23-P1P2	GTATAGAGGCCCGTCCTCTG	1.0	1.0	predicted	ZNF253_+_19976912.23-P1P2	CCGGAGTTCTCCCTGCCCAC	2.0	2.0	predicted	ZNF253_-_19976741.23-P1P2|ZNF253_+_19976912.23-P1P2
RPL27A	P1P2	1-2	essential	RPL27A_-_8704363.23-P1P2	GTTCGTCTGGGCTGCCAACA	1.0	5.0	essential	RPL27A_-_8704367.23-P1P2	ACCATGTTGGCAGCCCAGAC	2.0	3.0	essential	RPL27A_-_8704363.23-P1P2|RPL27A_-_8704367.23-P1P2
MRPS24	P1P2	1-2	significant	MRPS24_+_43909046.23-P1P2	GGCTGGGGCCACGGGTGAGT	1.0	3.0	empirical	MRPS24_-_43909060.23-P1P2	CGGGTGAGTGGGGCGACTCC	2.0	2.0	empirical	MRPS24_+_43909046.23-P1P2|MRPS24_-_43909060.23-P1P2
RPL9	P1P2	1-2	essential	RPL9_+_39460504.23-P1P2	GCTGCGTCTACTGCGAGGTA	1.0	2.0	essential	RPL9_+_39460483.23-P1P2	CCACGAGCACAGAAACATCC	2.0	1.0	essential	RPL9_+_39460504.23-P1P2|RPL9_+_39460483.23-P1P2
TTC1	P1P2	1-2	essential	TTC1_-_159436216.23-P1P2	GAGGTTGTGAGTAACCCCGT	1.0	1.0	essential	TTC1_-_159436177.23-P1P2	CCTTCTTAGCCTCTGAGAGC	2.0	4.0	essential	TTC1_-_159436216.23-P1P2|TTC1_-_159436177.23-P1P2
TFAM	P1P2	1-2	significant	TFAM_+_60145205.23-P1P2	GGAACCCGCGTGCGACCCTC	1.0	2.0	empirical	TFAM_-_60145223.23-P1P2	GCGTGCGACCCTCCGGCGTC	2.0	3.0	empirical	TFAM_+_60145205.23-P1P2|TFAM_-_60145223.23-P1P2
ZNF763	P1P2	1-2	nonessential	ZNF763_+_12035921.23-P1P2	GCCGCGCAGCGAGGAAGGTG	1.0	1.0	predicted	ZNF763_-_12035979.23-P1P2	TCTCGGGCTGGTCTGACCGC	2.0	2.0	predicted	ZNF763_+_12035921.23-P1P2|ZNF763_-_12035979.23-P1P2
RPL36A	P1P2	1-2	essential	RPL36A_-_100646038.23-P1P2	GGCGCTCACGCAAGCATGGT	1.0	1.0	essential	RPL36A_-_100646053.23-P1P2	CCACCAGCAAGTCCTACCAC	2.0	3.0	essential	RPL36A_-_100646038.23-P1P2|RPL36A_-_100646053.23-P1P2
MRPL3	P1P2	1-2	essential	MRPL3_+_131221797.23-P1P2	GCGTCGCAGAGAGCATCGGC	1.0	5.0	essential	MRPL3_+_131221782.23-P1P2	CCGGAACGGTCGCCGGCCGC	2.0	7.0	essential	MRPL3_+_131221797.23-P1P2|MRPL3_+_131221782.23-P1P2
SLC16A5	P1P2	1-2	significant	SLC16A5_-_73084484.23-P1P2	GAGCACTGCGGGGATGGGCA	1.0	8.0	empirical	SLC16A5_-_73084264.23-P1P2	CCACTGAGCCCGCCCAGGCC	2.0	2.0	empirical	SLC16A5_-_73084484.23-P1P2|SLC16A5_-_73084264.23-P1P2
CCP110	P1P2	1-2	significant	CCP110_+_19535267.23-P1P2	GCCGCCATATTACGGATCTC	1.0	2.0	empirical	CCP110_-_19535293.23-P1P2	CCCCGCCATATTACGGATCC	2.0	1.0	empirical	CCP110_+_19535267.23-P1P2|CCP110_-_19535293.23-P1P2
RPL10A	P1P2	1-2	essential	RPL10A_-_35436407.23-P1P2	GGAGCCTCCCTCTTCCACCG	1.0	1.0	essential	RPL10A_-_35436216.23-P1P2	CATGGCTTCTCACGCCGCGC	2.0	3.0	essential	RPL10A_-_35436407.23-P1P2|RPL10A_-_35436216.23-P1P2
TSR1	P1	1-2	significant	TSR1_+_2239717.23-P1	GGTACACGCGCGCTGCGGCA	1.0	1.0	empirical	TSR1_+_2239506.23-P1	TAGAAAGGGCCTTTCGCGTC	2.0	7.0	empirical	TSR1_+_2239717.23-P1|TSR1_+_2239506.23-P1
ATRIP	P1P2	1-2	significant	ATRIP_-_48488199.23-P1P2	GGTCCAGTTCTCCGGCCTGG	1.0	5.0	empirical	ATRIP_-_48488160.23-P1P2	CTTGCCTCCGCCGCGAGTGC	2.0	1.0	empirical	ATRIP_-_48488199.23-P1P2|ATRIP_-_48488160.23-P1P2
CUL7	P1P2	1-2	significant	CUL7_-_43021163.23-P1P2	GCAGGGTGCACAGACCAGGT	1.0	4.0	empirical	CUL7_-_43021528.23-P1P2	ACTCACGCGGGTGCAGCTCC	1.0	1.0	predicted	CUL7_-_43021163.23-P1P2|CUL7_-_43021528.23-P1P2
WEE1	P1P2	1-2	significant	WEE1_+_9595254.23-P1P2	GCGGGGCGGCCCGAGCACCG	1.0	1.0	empirical	WEE1_-_9595630.23-P1P2	CGGTGCTGTGGCCGCTGCCC	2.0	4.0	empirical	WEE1_+_9595254.23-P1P2|WEE1_-_9595630.23-P1P2
POGZ	P1P2	1-2	significant	POGZ_+_151431895.23-P1P2	GCCGCGCCAGCTCCCGTACA	1.0	5.0	empirical	POGZ_+_151431645.23-P1P2	GTAGTCTGACCCGAGGAAGC	2.0	2.0	empirical	POGZ_+_151431895.23-P1P2|POGZ_+_151431645.23-P1P2
ESF1	P1	1-2	essential	ESF1_+_13765524.23-P1	GGGCTTGGTAGGACTGCGGA	1.0	5.0	essential	ESF1_+_13765535.23-P1	ACCAAGCCTCACGTGGGGCC	2.0	3.0	essential	ESF1_+_13765524.23-P1|ESF1_+_13765535.23-P1
THOC6	P1P2	1-2	significant	THOC6_-_3074073.23-P1P2	GCGCGGGCGCGGAAGACGGG	1.0	1.0	empirical	THOC6_+_3074256.23-P1P2	CTCTAGGCACGTAAGGCCTC	2.0	2.0	empirical	THOC6_-_3074073.23-P1P2|THOC6_+_3074256.23-P1P2
ARPC4	P1P2	1-2	significant	ARPC4_-_9834808.23-P1P2	GGCCCAGCCAGCGCCCGCGA	1.0	1.0	empirical	ARPC4_-_9834275.23-P1P2	CACCTCTAGCGGCTTTGCTC	2.0	4.0	empirical	ARPC4_-_9834808.23-P1P2|ARPC4_-_9834275.23-P1P2
ARMC6	P1P2	1-2	nonessential	ARMC6_+_19144442.23-P1P2	GAGCGTCCGCCCAGAAGAAG	1.0	1.0	predicted	ARMC6_-_19144470.23-P1P2	CCAGAGCGTCCGCCCAGAAC	2.0	2.0	predicted	ARMC6_+_19144442.23-P1P2|ARMC6_-_19144470.23-P1P2
TNNT2	P1P2	1-2	nonessential	TNNT2_+_201346744.23-P1P2	GCAGCTGCTGTTCTGAGGTA	2.0	2.0	predicted	TNNT2_-_201346779.23-P1P2	GGATCTGTCGGCAGCTGCTC	3.0	3.0	predicted	TNNT2_+_201346744.23-P1P2|TNNT2_-_201346779.23-P1P2
MRPS10	P1P2	1-2	significant	MRPS10_+_42185532.23-P1P2	GCGGCGCCTCTGGCAGGTAC	1.0	7.0	empirical	MRPS10_+_42185527.23-P1P2	ATCCAGTACCTGCCAGAGGC	2.0	1.0	empirical	MRPS10_+_42185532.23-P1P2|MRPS10_+_42185527.23-P1P2
POP5	P1P2	1-2	essential	POP5_+_121019173.23-P1P2	GCACGCCGGACCGGAGAGCG	1.0	2.0	essential	POP5_-_121019190.23-P1P2	GACCGGAGAGCGCGGAGGCC	2.0	3.0	essential	POP5_+_121019173.23-P1P2|POP5_-_121019190.23-P1P2
UBR4	P1P2	1-2	significant	UBR4_-_19536410.23-P1P2	GCGTTGGCGGAGGGAAACCC	1.0	10.0	empirical	UBR4_-_19536774.23-P1P2	CCGGAGGGAGCCGCAGTAGC	2.0	4.0	empirical	UBR4_-_19536410.23-P1P2|UBR4_-_19536774.23-P1P2
DPAGT1	P1P2	1-2	significant	DPAGT1_-_118972536.23-P1P2	GAGCCGCCGTCGGGACACCG	1.0	3.0	empirical	DPAGT1_+_118972531.23-P1P2	GGGAACCTCTCTAAGGCAAC	2.0	7.0	empirical	DPAGT1_-_118972536.23-P1P2|DPAGT1_+_118972531.23-P1P2
SRSF11	P2	1-2	significant	SRSF11_+_70687220.23-P2	GCGGATTGCGGGAGAGAGGA	1.0	1.0	empirical	SRSF11_-_70687171.23-P2	CCGTTTCTCCGCCCCGCCGC	2.0	2.0	empirical	SRSF11_+_70687220.23-P2|SRSF11_-_70687171.23-P2
WDR74	P1	1-2	significant	WDR74_+_62607006.23-P1	GTGCACGCTGGAACCATGTG	1.0	1.0	empirical	WDR74_+_62607035.23-P1	CCATGACAAAGCCTGGAGGC	2.0	4.0	empirical	WDR74_+_62607006.23-P1|WDR74_+_62607035.23-P1
NDUFS5	P1	1-2	significant	NDUFS5_-_39492036.23-P1	GCTAGCTAGTCGTTCTGAAG	1.0	1.0	empirical	NDUFS5_-_39492056.23-P1	TGACTCTTCTCTGGCCGCCC	2.0	4.0	empirical	NDUFS5_-_39492036.23-P1|NDUFS5_-_39492056.23-P1
DPH6	P1P2	1-2	significant	DPH6_-_35838270.23-P1P2	GGCGCTAGCGGCGGCTGGAA	1.0	1.0	empirical	DPH6_+_35838318.23-P1P2	GATCAGAGCCGCGACCCTCC	2.0	8.0	empirical	DPH6_-_35838270.23-P1P2|DPH6_+_35838318.23-P1P2
LRRC37B	P1P2	1-2	nonessential	LRRC37B_-_30334632.23-P1P2	GGCCTGGGCTCCAACAAGAG	1.0	1.0	predicted	LRRC37B_+_30334606.23-P1P2	CCGCCTGGGCTCCAACAAGC	2.0	2.0	predicted	LRRC37B_-_30334632.23-P1P2|LRRC37B_+_30334606.23-P1P2
RPS9	P1P2	1-2	significant	RPS9_-_54704761.23-P1P2	GCGGGTGGTTTGCTTAGGTG	1.0	1.0	empirical	RPS9_+_54704997.23-P1P2	TTACGCTCACACTTCTCTCC	2.0	2.0	empirical	RPS9_-_54704761.23-P1P2|RPS9_+_54704997.23-P1P2
NRDE2	P1P2	1-2	essential	NRDE2_+_90798265.23-P1P2	GCCATCCCTATAGAGAAGAA	1.0	4.0	essential	NRDE2_-_90798256.23-P1P2	GTGGTCATGGCGCTGTTCCC	2.0	1.0	essential	NRDE2_+_90798265.23-P1P2|NRDE2_-_90798256.23-P1P2
KATNB1	P1P2	1-2	nonessential	KATNB1_-_57769705.23-P1P2	GCAGCGGCCAATCAAGGCAG	1.0	1.0	predicted	KATNB1_-_57769699.23-P1P2	TGATTGGCCGCTGCTTGACC	2.0	2.0	predicted	KATNB1_-_57769705.23-P1P2|KATNB1_-_57769699.23-P1P2
NUP214	P1P2	1-2	significant	NUP214_-_134001051.23-P1P2	GGTTCCGTGGGCAAGGCCGT	1.0	2.0	empirical	NUP214_-_134001039.23-P1P2	ACGGAACCCAGGCCGCTCGC	2.0	1.0	empirical	NUP214_-_134001051.23-P1P2|NUP214_-_134001039.23-P1P2
HIST2H3D	ENST00000331491.1	1-2	nonessential	HIST2H3D_-_149784861.23-ENST00000331491.1	GGCGGATGCGGCGGGCCAAC	1.0	1.0	predicted	HIST2H3D_-_149785258.23-ENST00000331491.1	TCTCCTATCAATGAGACAGC	2.0	2.0	predicted	HIST2H3D_-_149784861.23-ENST00000331491.1|HIST2H3D_-_149785258.23-ENST00000331491.1
GTF3C5	P1P2	1-2	significant	GTF3C5_+_135906441.23-P1P2	GCGCTCCCGCCTCAGCTCCA	1.0	5.0	empirical	GTF3C5_-_135906397.23-P1P2	TGTGCGTCTGGCAGGGCCCC	2.0	3.0	empirical	GTF3C5_+_135906441.23-P1P2|GTF3C5_-_135906397.23-P1P2
UNC45A	P2	1-2	significant	UNC45A_-_91473443.23-P2	GAGTAACCCGCAATGCGGAA	1.0	1.0	predicted	UNC45A_+_91473462.23-P2	AGTTTCCCGCGCGGCTTGAC	2.0	2.0	predicted	UNC45A_-_91473443.23-P2|UNC45A_+_91473462.23-P2
NDUFAF3	P1P2	1-2	significant	NDUFAF3_+_49059560.23-P1P2	GGCCATGGCTGACCAACGCG	1.0	4.0	empirical	NDUFAF3_-_49059542.23-P1P2	TTAGTCCCCGGGTTGGGAGC	2.0	1.0	empirical	NDUFAF3_+_49059560.23-P1P2|NDUFAF3_-_49059542.23-P1P2
SPCS3	P2	1-2	significant	SPCS3_-_177242413.23-P2	GGCCATTGTCAGCCCTGTGA	1.0	4.0	empirical	SPCS3_-_177242377.23-P2	CAGGTCTATTCGAACAATAC	1.0	1.0	predicted	SPCS3_-_177242413.23-P2|SPCS3_-_177242377.23-P2
MRPL39	P1P2	1-2	essential	MRPL39_+_26979780.23-P1P2	GGTTCTCACCGCTGCTATGG	1.0	2.0	essential	MRPL39_+_26979728.23-P1P2	CCGGGTGCGACCAGCCAGAC	2.0	3.0	essential	MRPL39_+_26979780.23-P1P2|MRPL39_+_26979728.23-P1P2
ERCC2	P1P2	1-2	essential	ERCC2_+_45873802.23-P1P2	GCCCCGCTGCACAGTCCGGC	1.0	7.0	essential	ERCC2_+_45873591.23-P1P2	CCGGTAACCCTCAGGTCCTC	2.0	5.0	essential	ERCC2_+_45873802.23-P1P2|ERCC2_+_45873591.23-P1P2
NOB1	P1P2	1-2	significant	NOB1_+_69788742.23-P1P2	GATGCGGCTCTGCAGGTACG	1.0	2.0	empirical	NOB1_+_69788621.23-P1P2	ATGTCCTGCGGACAGAACGC	2.0	1.0	empirical	NOB1_+_69788742.23-P1P2|NOB1_+_69788621.23-P1P2
CBX1	P1P2	1-2	nonessential	CBX1_+_46178553.23-P1P2	GCGGCGGGAGCCCTGCGTGA	1.0	1.0	predicted	CBX1_-_46178513.23-P1P2	GGGTCCAGCGTCCTGCTTCC	2.0	2.0	predicted	CBX1_+_46178553.23-P1P2|CBX1_-_46178513.23-P1P2
INO80	P1P2	1-2	significant	INO80_+_41408265.23-P1P2	GGGCCTCAGAGAGCGAACCG	1.0	6.0	empirical	INO80_+_41408150.23-P1P2	ACGTCTAGTTGCCTCACCTC	2.0	4.0	empirical	INO80_+_41408265.23-P1P2|INO80_+_41408150.23-P1P2
SLU7	P1P2	1-2	essential	SLU7_+_159846048.23-P1P2	GATTCTGTCGGATGGACTTG	1.0	1.0	essential	SLU7_+_159846060.23-P1P2	ACAGAATCCAAGCCAATCTC	2.0	2.0	essential	SLU7_+_159846048.23-P1P2|SLU7_+_159846060.23-P1P2
TOP2A	P1P2	1-2	essential	TOP2A_+_38574121.23-P1P2	GACGCGCGTCTGTGGAGAAG	1.0	1.0	essential	TOP2A_+_38573936.23-P1P2	CAGAGCTTCACCCGTCACGC	2.0	8.0	essential	TOP2A_+_38574121.23-P1P2|TOP2A_+_38573936.23-P1P2
ORC6	P1P2	1-2	significant	ORC6_+_46723646.23-P1P2	GCTCGGCGAGGCCCAGGCGC	1.0	1.0	empirical	ORC6_+_46723615.23-P1P2	TGGGGTCGGAGCTGATCGGC	2.0	3.0	empirical	ORC6_+_46723646.23-P1P2|ORC6_+_46723615.23-P1P2
GNB1L	P1P2	1-2	significant	GNB1L_+_19842341.23-P1P2	GGTTCCCGACTCCGGCAAGA	1.0	5.0	empirical	GNB1L_-_19842322.23-P1P2	GGGCGGCCGGCTTGAACTCC	2.0	2.0	empirical	GNB1L_+_19842341.23-P1P2|GNB1L_-_19842322.23-P1P2
POLG2	P1P2	1-2	essential	POLG2_+_62493131.23-P1P2	GACGGTAGTGGTGGCTTGTT	1.0	4.0	essential	POLG2_+_62493140.23-P1P2	CCACTACCGTTAACAGAATC	2.0	1.0	essential	POLG2_+_62493131.23-P1P2|POLG2_+_62493140.23-P1P2
UPF2	P1P2	1-2	significant	UPF2_+_12084799.23-P1P2	GGAGGGGAGAGCCCGAGCGC	1.0	1.0	empirical	UPF2_+_12084793.23-P1P2	ACTCCAGCGCTCGGGCTCTC	2.0	2.0	empirical	UPF2_+_12084799.23-P1P2|UPF2_+_12084793.23-P1P2
RPS23	P1P2	1-2	essential	RPS23_+_81574137.23-P1P2	GCCCGTGGCGCCGACAGGAT	1.0	1.0	essential	RPS23_+_81574124.23-P1P2	CAACAGCTCACCCATCCTGC	2.0	3.0	essential	RPS23_+_81574137.23-P1P2|RPS23_+_81574124.23-P1P2
CACNB3	P2	1-2	nonessential	CACNB3_+_49209404.23-P2	GCCGAGGCGGGAGCAAAACC	1.0	1.0	predicted	CACNB3_-_49209408.23-P2	GGCCGCTGCTCTGCACGCTC	2.0	2.0	predicted	CACNB3_+_49209404.23-P2|CACNB3_-_49209408.23-P2
GNL2	P1P2	1-2	essential	GNL2_+_38061508.23-P1P2	GGGTCCGGCGTGGTTCAGGC	1.0	9.0	essential	GNL2_+_38061333.23-P1P2	TCGATCAGCCCTGCCGCCTC	2.0	3.0	essential	GNL2_+_38061508.23-P1P2|GNL2_+_38061333.23-P1P2
CYFIP1	P1P2	1-2	significant	CYFIP1_+_22893097.23-P1P2	GCGCGGAATCCGGGATCCGG	1.0	3.0	empirical	CYFIP1_+_22892711.23-P1P2	GAGTGACTCACTCGGCCAAC	2.0	4.0	empirical	CYFIP1_+_22893097.23-P1P2|CYFIP1_+_22892711.23-P1P2
FAM229A	P1P2	1-2	nonessential	FAM229A_-_32827628.23-P1P2	GTGGCCGCGGGAGAACGCTC	1.0	1.0	predicted	FAM229A_-_32827685.23-P1P2	TCCTCGACGCCCGGGCCCGC	2.0	2.0	predicted	FAM229A_-_32827628.23-P1P2|FAM229A_-_32827685.23-P1P2
URI1	P1P2	1-2	significant	URI1_+_30433533.23-P1P2	GCGCAGCCGCGCCACATCCG	1.0	6.0	empirical	URI1_+_30433164.23-P1P2	CGCGACGCCTGGCTGGGCCC	2.0	1.0	empirical	URI1_+_30433533.23-P1P2|URI1_+_30433164.23-P1P2
MED1	P1P2	1-2	essential	MED1_-_37607464.23-P1P2	GATCAATCTGAAGTCCCCGG	1.0	1.0	essential	MED1_+_37607273.23-P1P2	CTACAGTCACTTACCCTCGC	2.0	6.0	essential	MED1_-_37607464.23-P1P2|MED1_+_37607273.23-P1P2
PDAP1	P1P2	1-2	significant	PDAP1_-_99006167.23-P1P2	GCCCGCCCCTCACCTCCTTT	1.0	3.0	empirical	PDAP1_+_99006152.23-P1P2	CACCTCCTTTAGGCATTGCC	2.0	4.0	empirical	PDAP1_-_99006167.23-P1P2|PDAP1_+_99006152.23-P1P2
BOP1	P1	1-2	significant	BOP1_+_145515084.23-P1	GGCCCGGTCGCTGTCGGAAG	1.0	2.0	empirical	BOP1_+_145515090.23-P1	ACAGCGACCGGGCCGCGTGC	2.0	4.0	empirical	BOP1_+_145515084.23-P1|BOP1_+_145515090.23-P1
MRPS6	P1P2	1-2	significant	MRPS6_+_35445887.23-P1P2	GGCTGCGCCGGACGGCTCCC	1.0	3.0	empirical	MRPS6_+_35445873.23-P1P2	TGCTTTCGCCGCCTGGGAGC	2.0	5.0	empirical	MRPS6_+_35445887.23-P1P2|MRPS6_+_35445873.23-P1P2
RPLP1	P1P2	1-2	significant	RPLP1_+_69745416.23-P1P2	GCCTGGAGCCGGGAACCGCA	1.0	8.0	empirical	RPLP1_-_69745147.23-P1P2	ATACGCAGCCTCTTATGTGC	2.0	1.0	empirical	RPLP1_+_69745416.23-P1P2|RPLP1_-_69745147.23-P1P2
LAMTOR3	P1P2	1-2	significant	LAMTOR3_-_100815552.23-P1P2	GCAGGGACAGCTTTAAAGAC	1.0	6.0	empirical	LAMTOR3_-_100815661.23-P1P2	CCGGGCCCCTCCGGAAATCC	2.0	1.0	empirical	LAMTOR3_-_100815552.23-P1P2|LAMTOR3_-_100815661.23-P1P2
PGK1	P1P2	1-2	essential	PGK1_+_77359761.23-P1P2	GCTGCCGACGTGCGCTCCGG	1.0	4.0	essential	PGK1_+_77359734.23-P1P2	GCGCGGTGTTCCGCATTCTC	2.0	2.0	essential	PGK1_+_77359761.23-P1P2|PGK1_+_77359734.23-P1P2
MRPL19	P1P2	1-2	essential	MRPL19_+_75874011.23-P1P2	GAGGCGATAGAGGCCGGCGG	1.0	2.0	essential	MRPL19_-_75874385.23-P1P2	ACCCCAGTTGCCGGCCTAGC	2.0	9.0	essential	MRPL19_+_75874011.23-P1P2|MRPL19_-_75874385.23-P1P2
PSMD1	P1P2	1-2	essential	PSMD1_-_231921650.23-P1P2	GGCGCACCCGGGGAGCAAGG	1.0	3.0	essential	PSMD1_+_231921605.23-P1P2	GAGGAGGCGACTGACTGAGC	2.0	2.0	essential	PSMD1_-_231921650.23-P1P2|PSMD1_+_231921605.23-P1P2
YRDC	P1P2	1-2	nonessential	YRDC_-_38273817.23-P1P2	GCCCACGCTGGCAGCCACCG	1.0	1.0	predicted	YRDC_-_38273805.23-P1P2	GCGTGGGGTTGAGCGAGGGC	2.0	2.0	predicted	YRDC_-_38273817.23-P1P2|YRDC_-_38273805.23-P1P2
NOL6	P1P2	1-2	essential	NOL6_-_33473848.23-P1P2	GGCGCCGGCCCCATCACTCA	1.0	3.0	essential	NOL6_+_33473879.23-P1P2	GGTCTATACCTCATAGCTTC	2.0	1.0	essential	NOL6_-_33473848.23-P1P2|NOL6_+_33473879.23-P1P2
BRIX1	P1P2	1-2	significant	BRIX1_-_34916034.23-P1P2	GTGTCCCCGGGCTACACCTG	1.0	10.0	empirical	BRIX1_-_34915874.23-P1P2	CCACGCCGTTTCCTCTTGGC	2.0	4.0	empirical	BRIX1_-_34916034.23-P1P2|BRIX1_-_34915874.23-P1P2
CSNK2B	P1P2	1-2	significant	CSNK2B_+_31633873.23-P1P2	GGACCGCGGCAGGCGAAGTG	1.0	6.0	empirical	CSNK2B_-_31634088.23-P1P2	GACCTGGTCGCTTCCTCCCC	2.0	4.0	empirical	CSNK2B_+_31633873.23-P1P2|CSNK2B_-_31634088.23-P1P2
DENR	P1P2	1-2	significant	DENR_+_123237630.23-P1P2	GAGGCGAAGGAGCAACCCCG	1.0	3.0	empirical	DENR_+_123237807.23-P1P2	CGGGCTTCTCCGATGACCCC	2.0	8.0	empirical	DENR_+_123237630.23-P1P2|DENR_+_123237807.23-P1P2
UFL1	P1P2	1-2	significant	UFL1_+_96969723.23-P1P2	GGCCTGACTCGCAGTAGACG	1.0	1.0	empirical	UFL1_+_96969744.23-P1P2	TGATGGCGGACGCCTGGGAC	2.0	7.0	empirical	UFL1_+_96969723.23-P1P2|UFL1_+_96969744.23-P1P2
BARD1	P1P2	1-2	significant	BARD1_+_215674388.23-P1P2	GCCCAGACGCGGGAAGAGCT	1.0	4.0	empirical	BARD1_+_215674399.23-P1P2	CGTCTGGGACGGCGGGCCGC	2.0	1.0	empirical	BARD1_+_215674388.23-P1P2|BARD1_+_215674399.23-P1P2
WDHD1	P1P2	1-2	significant	WDHD1_-_55493772.23-P1P2	GGACCGAGCCTCCGCCACTG	1.0	4.0	empirical	WDHD1_-_55493748.23-P1P2	GGTGAGTCCCCACTCCGGCC	2.0	1.0	empirical	WDHD1_-_55493772.23-P1P2|WDHD1_-_55493748.23-P1P2
YTHDC1	P1P2	1-2	essential	YTHDC1_-_69215701.23-P1P2	GAGGCCCAGCCTTCTCGTTA	1.0	5.0	essential	YTHDC1_-_69215755.23-P1P2	GCCGTCGCCATCTGTTTCCC	2.0	1.0	essential	YTHDC1_-_69215701.23-P1P2|YTHDC1_-_69215755.23-P1P2
NFYC	P1P2	1-2	significant	NFYC_+_41157619.23-P1P2	GCGCGAGGAAGTGAGGTCTC	1.0	1.0	empirical	NFYC_+_41157405.23-P1P2	CCGCTTCGCGCGCGCTCCGC	2.0	5.0	empirical	NFYC_+_41157619.23-P1P2|NFYC_+_41157405.23-P1P2
PDCD6	P1P2	1-2	nonessential	PDCD6_+_271780.23-P1P2	GCAGCGACGAGAGACCTCTC	1.0	1.0	predicted	PDCD6_+_271842.23-P1P2	ACTCTTACCGCCCCGGCCCC	2.0	2.0	predicted	PDCD6_+_271780.23-P1P2|PDCD6_+_271842.23-P1P2
KIF4A	P1P2	1-2	significant	KIF4A_-_69509986.23-P1P2	GGGCCCAGGGAGAACGGGGA	1.0	2.0	empirical	KIF4A_+_69510413.23-P1P2	GGAGAGCCTCAGGTGCGTAC	2.0	2.0	empirical	KIF4A_-_69509986.23-P1P2|KIF4A_+_69510413.23-P1P2
SRP68	P1P2	1-2	significant	SRP68_+_74068540.23-P1P2	GAGAAGCAGGTCCCAGGCGG	1.0	1.0	empirical	SRP68_-_74068607.23-P1P2	CTATCCCGTCTTGCTCTGCC	2.0	3.0	empirical	SRP68_+_74068540.23-P1P2|SRP68_-_74068607.23-P1P2
DHX15	P1P2	1-2	essential	DHX15_+_24586128.23-P1P2	GGGTTCCGGCCGCACCGTGT	1.0	1.0	essential	DHX15_+_24586116.23-P1P2	CTACTACAGCCCACACGGTC	2.0	3.0	essential	DHX15_+_24586128.23-P1P2|DHX15_+_24586116.23-P1P2
PGPEP1	P1P2	1-2	significant	PGPEP1_+_18451834.23-P1P2	GCCCGCAGGCCAGACAGAGG	1.0	2.0	empirical	PGPEP1_-_18451728.23-P1P2	TGACTCCCGACCCTGGGACC	2.0	8.0	empirical	PGPEP1_+_18451834.23-P1P2|PGPEP1_-_18451728.23-P1P2
NDUFAB1	P1P2	1-2	significant	NDUFAB1_-_23607588.23-P1P2	GGCGGGCAGGCGGCTGACAT	1.0	1.0	empirical	NDUFAB1_+_23607647.23-P1P2	GACCAGGGTTCCTTTCCGGC	2.0	9.0	empirical	NDUFAB1_-_23607588.23-P1P2|NDUFAB1_+_23607647.23-P1P2
THOC1	P1P2	1-2	significant	THOC1_-_268006.23-P1P2	GCGGGCAAACTGAAGAGCGG	1.0	2.0	empirical	THOC1_-_268026.23-P1P2	AGAAGATGTCTCCGACGCCC	2.0	1.0	empirical	THOC1_-_268006.23-P1P2|THOC1_-_268026.23-P1P2
SMC5	P1P2	1-2	significant	SMC5_+_72874111.23-P1P2	GGCCCGGACGACTGCAACAG	1.0	1.0	empirical	SMC5_-_72873963.23-P1P2	TTCCCACCGTCCGGCAGCCC	2.0	6.0	empirical	SMC5_+_72874111.23-P1P2|SMC5_-_72873963.23-P1P2
TIMM9	P1P2	1-2	essential	TIMM9_-_58893843.23-P1P2	GGGGACGGTTGAGCCTTGGG	1.0	7.0	essential	TIMM9_-_58893848.23-P1P2	TCCCTCCCAAGGCTCAACCC	2.0	4.0	essential	TIMM9_-_58893843.23-P1P2|TIMM9_-_58893848.23-P1P2
MED17	P1P2	1-2	essential	MED17_-_93517473.23-P1P2	GTGCTCCGAAAGACTTACCG	1.0	4.0	essential	MED17_+_93517550.23-P1P2	GAGGGTCTTCTGAGGCACCC	2.0	2.0	essential	MED17_-_93517473.23-P1P2|MED17_+_93517550.23-P1P2
ARFRP1	P1P2	1-2	nonessential	ARFRP1_-_62338974.23-P1P2	GCCTGGGGGGAGCGGACTAC	1.0	1.0	predicted	ARFRP1_+_62339198.23-P1P2	CACAGCCTGCGGCCTACCTC	2.0	2.0	predicted	ARFRP1_-_62338974.23-P1P2|ARFRP1_+_62339198.23-P1P2
XRN2	P1P2	1-2	significant	XRN2_+_21284193.23-P1P2	GCTCCGGCAAGGCTCCCCGG	1.0	5.0	empirical	XRN2_+_21284031.23-P1P2	CTATGGGAGTCCCGGCGTTC	2.0	1.0	empirical	XRN2_+_21284193.23-P1P2|XRN2_+_21284031.23-P1P2
ASF1B	P1P2	1-2	significant	ASF1B_+_14247360.23-P1P2	GGAAGAGGCGGGAGTGGACC	1.0	2.0	empirical	ASF1B_-_14247349.23-P1P2	ACTGACCCCACCGGACCCAC	2.0	3.0	empirical	ASF1B_+_14247360.23-P1P2|ASF1B_-_14247349.23-P1P2
PSMA4	P1P2	1-2	essential	PSMA4_-_78832818.23-P1P2	GGTTATTCGGTGAGCGGTGG	1.0	1.0	essential	PSMA4_+_78833014.23-P1P2	CCTCTGTGACGGACCGACCC	2.0	5.0	essential	PSMA4_-_78832818.23-P1P2|PSMA4_+_78833014.23-P1P2
DCTN5	P1P2	1-2	significant	DCTN5_-_23652764.23-P1P2	GTGAGTCCCAGTGGGCCACC	1.0	1.0	empirical	DCTN5_+_23653002.23-P1P2	CTGTCCCTTTGGCCATTAGC	2.0	5.0	empirical	DCTN5_-_23652764.23-P1P2|DCTN5_+_23653002.23-P1P2
DSN1	P1P2	1-2	essential	DSN1_+_35402133.23-P1P2	GCACCCTGATCAGGGAGTAT	1.0	3.0	essential	DSN1_+_35402097.23-P1P2	CAGGTCACTCCTGGACGCCC	2.0	4.0	essential	DSN1_+_35402133.23-P1P2|DSN1_+_35402097.23-P1P2
GNL3	P1P2	1-2	significant	GNL3_-_52720071.23-P1P2	GTCACACGTGGCGCCAGCGG	1.0	1.0	empirical	GNL3_-_52720042.23-P1P2	CTGACGAGCGTCACGCACTC	2.0	3.0	empirical	GNL3_-_52720071.23-P1P2|GNL3_-_52720042.23-P1P2
RGP1	P1P2	1-2	significant	RGP1_-_35749355.23-P1P2	GACCTAGCCAGGTCCCTGAG	1.0	3.0	empirical	RGP1_-_35749376.23-P1P2	CTAGGCCTCATCTGCCCGCC	2.0	8.0	empirical	RGP1_-_35749355.23-P1P2|RGP1_-_35749376.23-P1P2
DDX42	P1P2	1-2	nonessential	DDX42_+_61851679.23-P1P2	GGCGGGCGCGGAGCGAATCC	1.0	1.0	predicted	DDX42_-_61851682.23-P1P2	GAGCCCAAAGTACGCGCTGC	2.0	2.0	predicted	DDX42_+_61851679.23-P1P2|DDX42_-_61851682.23-P1P2
RPL8	P1P2	1-2	essential	RPL8_+_146017745.23-P1P2	GGCCGCGCTGGTGAACAGGT	1.0	4.0	essential	RPL8_-_146017783.23-P1P2	TGTTTCCTCTTTCGGCCGCC	2.0	1.0	essential	RPL8_+_146017745.23-P1P2|RPL8_-_146017783.23-P1P2
SEH1L	P1P2	1-2	significant	SEH1L_-_12948049.23-P1P2	GCGGGCTGCGAGGTCTGGCT	1.0	3.0	empirical	SEH1L_-_12948044.23-P1P2	GACCTCGCAGCCCGGGAGCC	2.0	1.0	empirical	SEH1L_-_12948049.23-P1P2|SEH1L_-_12948044.23-P1P2
NOM1	P1P2	1-2	significant	NOM1_-_156742480.23-P1P2	GCCGGCCCGGGCGGCTCCCA	1.0	2.0	empirical	NOM1_+_156742639.23-P1P2	CGGTGAGCTTTCGCCCGGGC	2.0	1.0	empirical	NOM1_-_156742480.23-P1P2|NOM1_+_156742639.23-P1P2
PPP1R8	P1P2	1-2	significant	PPP1R8_+_28157375.23-P1P2	GTGGGCAGTCGAACAGCGGG	1.0	5.0	empirical	PPP1R8_+_28157750.23-P1P2	TCCTGTACGTCCCGAGCGCC	2.0	8.0	empirical	PPP1R8_+_28157375.23-P1P2|PPP1R8_+_28157750.23-P1P2
PDRG1	P1P2	1-2	significant	PDRG1_+_30539748.23-P1P2	GGGCGCTATGCTATCACCCG	1.0	1.0	empirical	PDRG1_+_30539768.23-P1P2	ACCAACTCCGCTTGCGGCTC	2.0	6.0	empirical	PDRG1_+_30539748.23-P1P2|PDRG1_+_30539768.23-P1P2
E4F1	P1P2	1-2	significant	E4F1_-_2273644.23-P1P2	GGCGATGGCAGTGCGGGTGA	1.0	1.0	empirical	E4F1_-_2273621.23-P1P2	TCCATGTCGCAACGCGCCGC	2.0	2.0	empirical	E4F1_-_2273644.23-P1P2|E4F1_-_2273621.23-P1P2
SKA1	P1P2	1-2	significant	SKA1_-_47901441.23-P1P2	GCCTGCGCTGCGCTAGGGCG	1.0	4.0	empirical	SKA1_+_47901483.23-P1P2	GGGCTTCCAACGGAGACTGC	2.0	6.0	empirical	SKA1_-_47901441.23-P1P2|SKA1_+_47901483.23-P1P2
NPM1	P1P2	1-2	nonessential	NPM1_-_170814669.23-P1P2	GACGAGTGCGCGTGCTCGGT	1.0	1.0	predicted	NPM1_-_170814840.23-P1P2	GCGCTTATATATAGACCCTC	2.0	2.0	predicted	NPM1_-_170814669.23-P1P2|NPM1_-_170814840.23-P1P2
BRK1	P1P2	1-2	significant	BRK1_-_10157414.23-P1P2	GACAGGAGGATCCGGTGCAG	1.0	3.0	empirical	BRK1_-_10157427.23-P1P2	GGTGAATCTCCCGCTGCACC	2.0	1.0	empirical	BRK1_-_10157414.23-P1P2|BRK1_-_10157427.23-P1P2
IPO9	P1P2	1-2	significant	IPO9_+_201798535.23-P1P2	GCTGCGGTCAGCGGATTGTG	1.0	3.0	empirical	IPO9_+_201798365.23-P1P2	CCGGGCTGCCGGGTCCAGTC	2.0	5.0	empirical	IPO9_+_201798535.23-P1P2|IPO9_+_201798365.23-P1P2
TOPBP1	P1P2	1-2	significant	TOPBP1_+_133380602.23-P1P2	GGGCTCCAACGAGGTAAGTG	1.0	3.0	empirical	TOPBP1_+_133380779.23-P1P2	ACTTTCGCGCCAACCGCGCC	2.0	9.0	empirical	TOPBP1_+_133380602.23-P1P2|TOPBP1_+_133380779.23-P1P2
GINS1	P1P2	1-2	essential	GINS1_-_25388381.23-P1P2	GGACTAGAACGAAAGGAGTG	1.0	3.0	essential	GINS1_+_25388562.23-P1P2	GCGTTGGGCCCTGGGCTCTC	2.0	6.0	essential	GINS1_-_25388381.23-P1P2|GINS1_+_25388562.23-P1P2
UBC	P1P2	1-2	significant	UBC_+_125399044.23-P1P2	GCGTGTGGAGAGACCGCCAA	1.0	6.0	empirical	UBC_-_125399182.23-P1P2	GGATTTGGGTCGCAGTTCTC	2.0	2.0	empirical	UBC_+_125399044.23-P1P2|UBC_-_125399182.23-P1P2
PI4KA	P1P2	1-2	significant	PI4KA_+_21213006.23-P1P2	GGCGGCTCGTGAGGTGATGG	1.0	1.0	empirical	PI4KA_+_21213009.23-P1P2	TCACCTCACGAGCCGCGGCC	2.0	2.0	empirical	PI4KA_+_21213006.23-P1P2|PI4KA_+_21213009.23-P1P2
RFC3	P1P2	1-2	essential	RFC3_+_34392320.23-P1P2	GCCGATACTTGTCCACCCAG	1.0	1.0	essential	RFC3_+_34392294.23-P1P2	CCGGGAACTCGAGCTGCCAC	2.0	4.0	essential	RFC3_+_34392320.23-P1P2|RFC3_+_34392294.23-P1P2
PPP1R11	P1P2	1-2	significant	PPP1R11_-_30035028.23-P1P2	GTTAGCCAGGTTATCCCCAG	1.0	1.0	empirical	PPP1R11_-_30035402.23-P1P2	TCCGATTCTCCCAGCCCTAC	2.0	3.0	empirical	PPP1R11_-_30035028.23-P1P2|PPP1R11_-_30035402.23-P1P2
MRPL4	P1P2	1-2	significant	MRPL4_+_10362971.23-P1P2	GGCCTCACCTGGCTGCCGGT	1.0	3.0	empirical	MRPL4_-_10363144.23-P1P2	TACCCTCGCTCGCCACCTGC	2.0	9.0	empirical	MRPL4_+_10362971.23-P1P2|MRPL4_-_10363144.23-P1P2
WDR55	P1P2	1-2	significant	WDR55_-_140044470.23-P1P2	GTCCGAGGCTGACTACCCTG	1.0	1.0	empirical	WDR55_-_140044473.23-P1P2	CCGCAGGGTAGTCAGCCTCC	2.0	3.0	empirical	WDR55_-_140044470.23-P1P2|WDR55_-_140044473.23-P1P2
WRB	P1P2	1-2	significant	WRB_-_40752309.23-P1P2	GAGCACAGCCAGGAGCGTCC	1.0	3.0	empirical	WRB_+_40752275.23-P1P2	TAGCGGACCCAGCACAGCCC	2.0	4.0	empirical	WRB_-_40752309.23-P1P2|WRB_+_40752275.23-P1P2
VEZT	P1P2	1-2	significant	VEZT_-_95611616.23-P1P2	GCGTGCTGAGGCGGGTGGCA	1.0	2.0	empirical	VEZT_-_95611619.23-P1P2	CCATGCCACCCGCCTCAGCC	2.0	3.0	empirical	VEZT_-_95611616.23-P1P2|VEZT_-_95611619.23-P1P2
NOP56	P1P2	1-2	significant	NOP56_+_2633290.23-P1P2	GCACCATGGCGCCAGCTCCC	1.0	3.0	empirical	NOP56_+_2633285.23-P1P2	AACCCGGGAGCTGGCGCCAC	2.0	2.0	empirical	NOP56_+_2633290.23-P1P2|NOP56_+_2633285.23-P1P2
LSM2	P1P2	1-2	essential	LSM2_-_31774578.23-P1P2	GGCCGGACCGGGAAGACAGC	1.0	5.0	essential	LSM2_-_31774599.23-P1P2	CAGACCTGCTCGCAGCACCC	2.0	8.0	essential	LSM2_-_31774578.23-P1P2|LSM2_-_31774599.23-P1P2
ARL4D	P1P2	1-2	nonessential	ARL4D_-_41476546.23-P1P2	GCCATCGGAGGAGGGCGGGC	1.0	1.0	predicted	ARL4D_-_41476396.23-P1P2	GCAGACACCCACCGCGCCTC	2.0	2.0	predicted	ARL4D_-_41476546.23-P1P2|ARL4D_-_41476396.23-P1P2
TFDP1	P1P2	1-2	significant	TFDP1_+_114239040.23-P1P2	GCGGGACGCGGGGCTCACCC	1.0	1.0	empirical	TFDP1_-_114239078.23-P1P2	GGGCCGAGTGGCGCCGGGAC	2.0	3.0	empirical	TFDP1_+_114239040.23-P1P2|TFDP1_-_114239078.23-P1P2
UBR5	P1P2	1-2	significant	UBR5_-_103424582.23-P1P2	GCTCCCAGTCCCCAAATGGA	1.0	4.0	empirical	UBR5_+_103424940.23-P1P2	TCTCGCAGGCTCCGCTCCGC	2.0	3.0	empirical	UBR5_-_103424582.23-P1P2|UBR5_+_103424940.23-P1P2
TWISTNB	P1P2	1-2	essential	TWISTNB_+_19748588.23-P1P2	GGCCAGCGGCGGCTTCTGAT	1.0	4.0	essential	TWISTNB_+_19748599.23-P1P2	CCGCTGGCCGCGGCGCCTCC	2.0	3.0	essential	TWISTNB_+_19748588.23-P1P2|TWISTNB_+_19748599.23-P1P2
EIF1AD	P1P2	1-2	significant	EIF1AD_-_65769584.23-P1P2	GTCCCACCAGTCCAACTGCG	1.0	5.0	empirical	EIF1AD_+_65769557.23-P1P2	AGTTCCCACCAGTCCAACTC	2.0	4.0	empirical	EIF1AD_-_65769584.23-P1P2|EIF1AD_+_65769557.23-P1P2
RAD9A	P1P2	1-2	significant	RAD9A_-_67159466.23-P1P2	GGAAGGGACCCCGGACCCGG	1.0	3.0	empirical	RAD9A_-_67159481.23-P1P2	AGCTCTCCGCGACCTCCGGC	2.0	4.0	empirical	RAD9A_-_67159466.23-P1P2|RAD9A_-_67159481.23-P1P2
SNAPC3	P1P2	1-2	significant	SNAPC3_-_15422880.23-P1P2	GGGAAGGAGTGGGGCGAACA	1.0	2.0	empirical	SNAPC3_+_15422891.23-P1P2	AGGTGGCCCTACGTGTAGCC	2.0	1.0	empirical	SNAPC3_-_15422880.23-P1P2|SNAPC3_+_15422891.23-P1P2
PNPT1	P1P2	1-2	essential	PNPT1_-_55920888.23-P1P2	GTGAGTGCCCGATCCCGCCG	1.0	1.0	essential	PNPT1_-_55920900.23-P1P2	TTCCTTCTGCCACGGCGGGC	2.0	5.0	essential	PNPT1_-_55920888.23-P1P2|PNPT1_-_55920900.23-P1P2
PNISR	P1	1-2	essential	PNISR_+_99873121.23-P1	GTGGAGAGGTGTTACCGGAA	1.0	3.0	essential	PNISR_+_99873109.23-P1	TTGTCGCCGCCGTTCCGGTC	2.0	4.0	essential	PNISR_+_99873121.23-P1|PNISR_+_99873109.23-P1
CCDC86	P1P2	1-2	essential	CCDC86_-_60609589.23-P1P2	GCAGGGGTGTGGAAACTTAC	1.0	3.0	essential	CCDC86_-_60609614.23-P1P2	TAACGGTGTATCCATGGCTC	2.0	1.0	essential	CCDC86_-_60609589.23-P1P2|CCDC86_-_60609614.23-P1P2
HAUS4	P1P2	1-2	essential	HAUS4_+_23426073.23-P1P2	GTTCGGGGAAGAGGAGCTCT	1.0	5.0	essential	HAUS4_-_23426310.23-P1P2	TTCCCGGGCCTTTCAGCTTC	2.0	7.0	essential	HAUS4_+_23426073.23-P1P2|HAUS4_-_23426310.23-P1P2
NOC2L	P1P2	1-2	significant	NOC2L_+_894616.23-P1P2	GACGCTTCGGGTTGGTGTCA	1.0	2.0	empirical	NOC2L_-_894602.23-P1P2	CAAGAGGTAAGCCGCGGGTC	2.0	5.0	empirical	NOC2L_+_894616.23-P1P2|NOC2L_-_894602.23-P1P2
CSH2	P2	1-2	nonessential	CSH2_-_61973880.23-P2	GACCTGGAGCCATTGCCACT	1.0	1.0	predicted	CSH2_+_61973860.23-P2	GGAGCCATTGCCACTAGGTC	2.0	2.0	predicted	CSH2_-_61973880.23-P2|CSH2_+_61973860.23-P2
MRPL10	P1P2	1-2	essential	MRPL10_-_45908834.23-P1P2	GGCCACTCCTTACCCGCCTG	1.0	7.0	essential	MRPL10_-_45908914.23-P1P2	TCTCCACTCGGCTTCCGTCC	2.0	1.0	essential	MRPL10_-_45908834.23-P1P2|MRPL10_-_45908914.23-P1P2
CPSF2	P1P2	1-2	essential	CPSF2_-_92588375.23-P1P2	GTCTGCCGGCCGGTAGTCCC	1.0	6.0	essential	CPSF2_+_92588358.23-P1P2	GCCGGTAGTCCCTGGCGCTC	2.0	2.0	essential	CPSF2_-_92588375.23-P1P2|CPSF2_+_92588358.23-P1P2
TCERG1	P1P2	1-2	essential	TCERG1_-_145826915.23-P1P2	GTGAACGCGGCCCTCTGTAA	1.0	3.0	essential	TCERG1_-_145826962.23-P1P2	CGGGTTGAATCGTTCACTCC	2.0	2.0	essential	TCERG1_-_145826915.23-P1P2|TCERG1_-_145826962.23-P1P2
RBM4	P2	1-2	essential	RBM4_-_66406629.23-P2	GTAGGACGGTGCCCCGAGAG	1.0	3.0	essential	RBM4_+_66406241.23-P2	CTGCCTTTCTTGTACTGTGC	2.0	4.0	essential	RBM4_-_66406629.23-P2|RBM4_+_66406241.23-P2
SKP2	P1P2	1-2	significant	SKP2_-_36152309.23-P1P2	GGCCAAAGCGGGAATCTGGG	1.0	2.0	empirical	SKP2_-_36152218.23-P1P2	CACTGCGCGCGCAAGGCTCC	2.0	9.0	empirical	SKP2_-_36152309.23-P1P2|SKP2_-_36152218.23-P1P2
ABCG1	P1P2	1-2	nonessential	ABCG1_-_43639282.23-P1P2	GCAGCCCGCACCCCGCGCAG	1.0	1.0	predicted	ABCG1_+_43639503.23-P1P2	CTCCCAGGAGCGCGTCCTCC	2.0	2.0	predicted	ABCG1_-_43639282.23-P1P2|ABCG1_+_43639503.23-P1P2
INTS2	P1P2	1-2	essential	INTS2_-_60004971.23-P1P2	GGTCTGGCCAGGCTCCGACA	1.0	10.0	essential	INTS2_-_60005353.23-P1P2	TTCCTCTCAGACCAGTACGC	2.0	5.0	essential	INTS2_-_60004971.23-P1P2|INTS2_-_60005353.23-P1P2
USP39	P1	1-2	essential	USP39_-_85843325.23-P1	GGGCCGGTAGTGGAGATGTC	1.0	3.0	essential	USP39_+_85843306.23-P1	GTAGTGGAGATGTCCGGCCC	2.0	4.0	essential	USP39_-_85843325.23-P1|USP39_+_85843306.23-P1
TRAPPC3	P1P2	1-2	significant	TRAPPC3_+_36615009.23-P1P2	GGGGTCGCCGAGCTAACCCG	1.0	1.0	empirical	TRAPPC3_+_36615028.23-P1P2	CTGCAGACGCCGGAGCCTAC	2.0	2.0	empirical	TRAPPC3_+_36615009.23-P1P2|TRAPPC3_+_36615028.23-P1P2
POLD1	P1P2	1-2	significant	POLD1_-_50887659.23-P1P2	GTTGAAGCGGGTGAGTAGAG	1.0	1.0	empirical	POLD1_-_50887603.23-P1P2	CTGACTCCCGCGCGCGCAAC	2.0	3.0	empirical	POLD1_-_50887659.23-P1P2|POLD1_-_50887603.23-P1P2
WBP1L	P1P2	1-2	nonessential	WBP1L_-_104503698.23-P1P2	GGAGCAGAGCCGGAAGCGGG	1.0	1.0	predicted	WBP1L_-_104503694.23-P1P2	CTTCCGGCTCTGCTCCACCC	2.0	2.0	predicted	WBP1L_-_104503698.23-P1P2|WBP1L_-_104503694.23-P1P2
NAA35	P1P2	1-2	nonessential	NAA35_-_88556178.23-P1P2	GGTGGCGGCGCGGGTGACCA	1.0	1.0	predicted	NAA35_+_88556248.23-P1P2	CCCGCGCGTGTGGCAGATCC	2.0	2.0	predicted	NAA35_-_88556178.23-P1P2|NAA35_+_88556248.23-P1P2
RPL39	P1P2	1-2	significant	RPL39_-_118925550.23-P1P2	GGACTTACCATGGCGAGCAG	1.0	1.0	empirical	RPL39_-_118925380.23-P1P2	GGAGGGAAGCTAGTGAGCCC	2.0	2.0	empirical	RPL39_-_118925550.23-P1P2|RPL39_-_118925380.23-P1P2
NDUFB6	P1P2	1-2	significant	NDUFB6_-_32573107.23-P1P2	GACGGCGCACCCTCGAACTA	1.0	3.0	empirical	NDUFB6_-_32573089.23-P1P2	TGTCCTTTTGCGTTGGTACC	2.0	4.0	empirical	NDUFB6_-_32573107.23-P1P2|NDUFB6_-_32573089.23-P1P2
ERH	P1P2	1-2	essential	ERH_+_69864986.23-P1P2	GTAAGCTCGTGTAACGGCGG	1.0	3.0	essential	ERH_-_69864782.23-P1P2	GACTCTAGGCCTCGGAGCCC	2.0	9.0	essential	ERH_+_69864986.23-P1P2|ERH_-_69864782.23-P1P2
DRAP1	P1P2	1-2	nonessential	DRAP1_-_65686955.23-P1P2	GGGCGGCGCTGGACCCGACG	1.0	1.0	predicted	DRAP1_-_65686753.23-P1P2	CAGTCTGGACCGCCGCTCCC	2.0	2.0	predicted	DRAP1_-_65686955.23-P1P2|DRAP1_-_65686753.23-P1P2
METTL1	P1P2	1-2	significant	METTL1_+_58165829.23-P1P2	GCGGAACGTGGCCGGAGCAG	1.0	2.0	empirical	METTL1_+_58165841.23-P1P2	CGTTCCGAGTCTCGGCTGCC	2.0	3.0	empirical	METTL1_+_58165829.23-P1P2|METTL1_+_58165841.23-P1P2
AQP7	P1P2	1-2	nonessential	AQP7_+_33402012.23-P1P2	GGGCAGTGGACCACAGCGGG	1.0	1.0	predicted	AQP7_+_33402004.23-P1P2	GCACGCCTCCCGCTGTGGTC	2.0	2.0	predicted	AQP7_+_33402012.23-P1P2|AQP7_+_33402004.23-P1P2
ATP6V1D	P1P2	1-2	significant	ATP6V1D_+_67826485.23-P1P2	GCCCGTAGAGGAAGACACTG	1.0	1.0	empirical	ATP6V1D_+_67826497.23-P1P2	CTACGGGAGTCAGCTGGTTC	2.0	2.0	empirical	ATP6V1D_+_67826485.23-P1P2|ATP6V1D_+_67826497.23-P1P2
TKT	P2	1-2	significant	TKT_+_53269134.23-P2	GCTGTCAGAGGGCTCTGTAT	1.0	1.0	predicted	TKT_-_53269130.23-P2	TGGCCTTCGCCAGCATCTAC	2.0	2.0	predicted	TKT_+_53269134.23-P2|TKT_-_53269130.23-P2
ALG2	P1P2	1-2	nonessential	ALG2_-_101984133.23-P1P2	GGGTGGAGGAACAGCACCGA	1.0	1.0	predicted	ALG2_+_101984159.23-P1P2	TGCTCCTCCGCCATGGCCCC	2.0	2.0	predicted	ALG2_-_101984133.23-P1P2|ALG2_+_101984159.23-P1P2
SNX15	P2	1-2	significant	SNX15_-_64795079.23-P2	GACCCCAGGACTCACCCCAA	1.0	1.0	predicted	SNX15_+_64794991.23-P2	CTCCAGCTCGGTTTCATGTC	2.0	2.0	predicted	SNX15_-_64795079.23-P2|SNX15_+_64794991.23-P2
GTF2B	P1P2	1-2	essential	GTF2B_-_89357167.23-P1P2	GCTCGGCGGGACATACTAAC	1.0	1.0	essential	GTF2B_-_89357171.23-P1P2	GCCGGTTAGTATGTCCCGCC	2.0	2.0	essential	GTF2B_-_89357167.23-P1P2|GTF2B_-_89357171.23-P1P2
MRPL51	P1P2	1-2	essential	MRPL51_+_6602410.23-P1P2	GGCCCACAGCTGCCTGGGTA	1.0	6.0	essential	MRPL51_-_6602409.23-P1P2	AAGATGGCTGTCTTCGCCTC	2.0	5.0	essential	MRPL51_+_6602410.23-P1P2|MRPL51_-_6602409.23-P1P2
COG2	P1P2	1-2	essential	COG2_+_230778253.23-P1P2	GCGGCCACCGCCAGTTTCCA	1.0	5.0	essential	COG2_+_230778278.23-P1P2	CCGAGTCGGTCTGCGCAGCC	2.0	4.0	essential	COG2_+_230778253.23-P1P2|COG2_+_230778278.23-P1P2
C6orf15	P1P2	1-2	nonessential	C6orf15_+_31080311.23-P1P2	GGATGCAGGGCCGCGTGGCA	1.0	1.0	predicted	C6orf15_-_31080269.23-P1P2	AGGTATGGAGGCCGTGATGC	2.0	2.0	predicted	C6orf15_+_31080311.23-P1P2|C6orf15_-_31080269.23-P1P2
ISCU	P1P2	1-2	significant	ISCU_-_108956404.23-P1P2	GGCGCAAGCCGGCAAGATGG	1.0	2.0	empirical	ISCU_-_108956377.23-P1P2	GTCCAGAGCGACGCCGAGGC	2.0	5.0	empirical	ISCU_-_108956404.23-P1P2|ISCU_-_108956377.23-P1P2
TRMT6	P1P2	1-2	significant	TRMT6_-_5931159.23-P1P2	GGCACTAGGAGCCCTCCGAC	1.0	3.0	empirical	TRMT6_+_5931035.23-P1P2	CTGAGCCCTCCATGACGCTC	2.0	6.0	empirical	TRMT6_-_5931159.23-P1P2|TRMT6_+_5931035.23-P1P2
NAF1	P1P2	1-2	significant	NAF1_+_164087918.23-P1P2	GGAGCCGTGAGCTTGTCCAG	1.0	5.0	empirical	NAF1_-_164087674.23-P1P2	GTTCTGAACGCCGTCGCGGC	2.0	10.0	empirical	NAF1_+_164087918.23-P1P2|NAF1_-_164087674.23-P1P2
NDUFS3	P1P2	1-2	significant	NDUFS3_-_47600652.23-P1P2	GCATCTGAGTAACATGGCGG	1.0	1.0	predicted	NDUFS3_-_47600710.23-P1P2	CTGGTCAGCGCCGAGGCCCC	2.0	2.0	predicted	NDUFS3_-_47600652.23-P1P2|NDUFS3_-_47600710.23-P1P2
EIF2B1	P1P2	1-2	significant	EIF2B1_+_124118187.23-P1P2	GGTGCAGCGCGCTGTCAGAC	1.0	1.0	empirical	EIF2B1_-_124118132.23-P1P2	CTGGGGCTCCGCAGCAGGAC	2.0	4.0	empirical	EIF2B1_+_124118187.23-P1P2|EIF2B1_-_124118132.23-P1P2
PLRG1	P1P2	1-2	essential	PLRG1_+_155471467.23-P1P2	GCTGCCGGAGGTGGGATACA	1.0	4.0	essential	PLRG1_+_155471521.23-P1P2	CCACAGCTGTGCAGCACCTC	2.0	3.0	essential	PLRG1_+_155471467.23-P1P2|PLRG1_+_155471521.23-P1P2
MED7	P1P2	1-2	essential	MED7_+_156570278.23-P1P2	GGACTAAGTCAGTAAAAGAG	1.0	9.0	essential	MED7_-_156569591.23-P1P2	CCGTGTTGGGACGCCGAGCC	2.0	1.0	essential	MED7_+_156570278.23-P1P2|MED7_-_156569591.23-P1P2
TCP1	P1P2	1-2	essential	TCP1_-_160210626.23-P1P2	GCGTACCCGAGCGATGTCCC	1.0	2.0	essential	TCP1_+_160210609.23-P1P2	GAGCGATGTCCCAGGAGCTC	2.0	1.0	essential	TCP1_-_160210626.23-P1P2|TCP1_+_160210609.23-P1P2
ECT2	P1P2	1-2	essential	ECT2_-_172468705.23-P1P2	GCGAGCGGCTCCAGAGCCAA	1.0	1.0	essential	ECT2_+_172468782.23-P1P2	GGAACTCCCTCGCCGCACCC	2.0	4.0	essential	ECT2_-_172468705.23-P1P2|ECT2_+_172468782.23-P1P2
LIN54	P1	1-2	nonessential	LIN54_+_83933961.23-P1	GGCGCCGCGCGACCAGGAGG	1.0	1.0	predicted	LIN54_+_83933984.23-P1	TGGGCTCCCAGCAGCAGCGC	2.0	2.0	predicted	LIN54_+_83933961.23-P1|LIN54_+_83933984.23-P1
BNIP1	P1P2	1-2	essential	BNIP1_-_172571554.23-P1P2	GGCCGGCGTCCCCAACATGG	1.0	3.0	essential	BNIP1_+_172572005.23-P1P2	CTGGTAGCGTCCGGGAGGCC	2.0	5.0	essential	BNIP1_-_172571554.23-P1P2|BNIP1_+_172572005.23-P1P2
UBA2	P1P2	1-2	significant	UBA2_+_34919311.23-P1P2	GGGACAACCACGAGCCGCGG	1.0	1.0	empirical	UBA2_+_34919335.23-P1P2	TGGCACTGTCGCGGGGGCTC	2.0	4.0	empirical	UBA2_+_34919311.23-P1P2|UBA2_+_34919335.23-P1P2
POLD2	P1P2	1-2	essential	POLD2_+_44163100.23-P1P2	GGGCGCGCCGCGCGGTGAGT	1.0	4.0	essential	POLD2_-_44162910.23-P1P2	CCATCAAGCACGTTCGAGCC	2.0	2.0	essential	POLD2_+_44163100.23-P1P2|POLD2_-_44162910.23-P1P2
CSNK1A1	P1P2	1-2	significant	CSNK1A1_+_148930963.23-P1P2	GCGTGAAGAAGCGGCTCCCG	1.0	2.0	empirical	CSNK1A1_-_148930629.23-P1P2	CCCTCCTCCGTAGCCTTGCC	2.0	9.0	empirical	CSNK1A1_+_148930963.23-P1P2|CSNK1A1_-_148930629.23-P1P2
ABHD17A	P1P2	1-2	nonessential	ABHD17A_-_1885483.23-P1P2	GCCGCAGCTCCCCCCACGGA	1.0	1.0	predicted	ABHD17A_+_1885470.23-P1P2	CCCACGGACGGAAGTGAGCC	2.0	2.0	predicted	ABHD17A_-_1885483.23-P1P2|ABHD17A_+_1885470.23-P1P2
SNRPA1	P1P2	1-2	significant	SNRPA1_+_101835417.23-P1P2	GCTCGCTGGCGGGAGGCCAC	1.0	1.0	empirical	SNRPA1_-_101835035.23-P1P2	TGTTAGGCCTTGCTTGGCTC	2.0	3.0	empirical	SNRPA1_+_101835417.23-P1P2|SNRPA1_-_101835035.23-P1P2
TARDBP	P1P2	1-2	significant	TARDBP_-_11072919.23-P1P2	GGGAAGTCAGCCGTGAGACC	1.0	1.0	empirical	TARDBP_+_11072781.23-P1P2	AGCAGCGGCCTAGCGGGTGC	2.0	5.0	empirical	TARDBP_-_11072919.23-P1P2|TARDBP_+_11072781.23-P1P2
SP2	P1P2	1-2	significant	SP2_-_45973616.23-P1P2	GGGTGTCAGGCTCTCGGTGG	1.0	3.0	empirical	SP2_-_45973659.23-P1P2	CTCATTACGACATCTTCCTC	2.0	2.0	empirical	SP2_-_45973616.23-P1P2|SP2_-_45973659.23-P1P2
PFDN5	P1P2	1-2	significant	PFDN5_-_53689354.23-P1P2	GTAAGTCGGCCTTCCCAACA	1.0	1.0	empirical	PFDN5_+_53689579.23-P1P2	CTTAGTCCTCTCATTGACCC	2.0	5.0	empirical	PFDN5_-_53689354.23-P1P2|PFDN5_+_53689579.23-P1P2
SBDS	P1P2	1-2	nonessential	SBDS_+_66460557.23-P1P2	GCCTGCCAGACACACTGTGA	1.0	1.0	predicted	SBDS_+_66460166.23-P1P2	CGGCCAACACCCCAGCCTGC	2.0	2.0	predicted	SBDS_+_66460557.23-P1P2|SBDS_+_66460166.23-P1P2
WDR25	P1P2	1-2	significant	WDR25_-_100842832.23-P1P2	GCGGGAGAACCGAGCGCTTC	1.0	1.0	predicted	WDR25_+_100842799.23-P1P2	GTCTGCCTCCGGGAGAACCC	2.0	2.0	predicted	WDR25_-_100842832.23-P1P2|WDR25_+_100842799.23-P1P2
DPH1	P2	1-2	significant	DPH1_+_1936832.23-P2	GGTTCTTCAGGATCTCAGGG	1.0	1.0	predicted	DPH1_+_1936853.23-P2	TCAGCTGCAGGCAGCAATCC	2.0	2.0	predicted	DPH1_+_1936832.23-P2|DPH1_+_1936853.23-P2
CNN2	P1P2	1-2	nonessential	CNN2_+_1026619.23-P1P2	GGGACGGGGCCGCACAGGAC	1.0	1.0	predicted	CNN2_+_1026615.23-P1P2	TCCCGTCCTGTGCGGCCCCC	2.0	2.0	predicted	CNN2_+_1026619.23-P1P2|CNN2_+_1026615.23-P1P2
BET1	P1P2	1-2	significant	BET1_-_93633620.23-P1P2	GGACCGCGTCTTCAGTACCA	1.0	3.0	empirical	BET1_-_93633591.23-P1P2	CTAGCTGTTTCCTACTCACC	2.0	4.0	empirical	BET1_-_93633620.23-P1P2|BET1_-_93633591.23-P1P2
PSMA1	P1P2	1-2	essential	PSMA1_+_14541841.23-P1P2	GCAGGCCCGCGCCGCCACCA	1.0	4.0	essential	PSMA1_-_14541640.23-P1P2	CTTTCGCTTCCCGGGGAGCC	2.0	1.0	essential	PSMA1_+_14541841.23-P1P2|PSMA1_-_14541640.23-P1P2
CDK9	P1P2	1-2	significant	CDK9_-_130548401.23-P1P2	GCGGCGGCAGCAGCGACTGG	1.0	1.0	empirical	CDK9_-_130548749.23-P1P2	CTCACGGGCGCCTCTCTGCC	2.0	4.0	empirical	CDK9_-_130548401.23-P1P2|CDK9_-_130548749.23-P1P2
STIL	P1P2	1-2	significant	STIL_-_47779785.23-P1P2	GGGAGCGCCACCGCCGACTC	1.0	4.0	empirical	STIL_+_47779776.23-P1P2	ACTCCGGCCCCGCCTCTGGC	2.0	2.0	empirical	STIL_-_47779785.23-P1P2|STIL_+_47779776.23-P1P2
NUFIP1	P1P2	1-2	significant	NUFIP1_+_45563567.23-P1P2	GTCCGGACCCGCCAGTGGTA	1.0	2.0	empirical	NUFIP1_+_45563572.23-P1P2	CTGGCGGGTCCGGAGTCTAC	2.0	1.0	empirical	NUFIP1_+_45563567.23-P1P2|NUFIP1_+_45563572.23-P1P2
NUS1	P1P2	1-2	nonessential	NUS1_-_117996643.23-P1P2	GACTGTCCATGTACTACTGG	1.0	1.0	predicted	NUS1_+_117996627.23-P1P2	TGTACTACTGGGGGCGGGGC	2.0	2.0	predicted	NUS1_-_117996643.23-P1P2|NUS1_+_117996627.23-P1P2
PPA1	P1P2	1-2	significant	PPA1_+_71993121.23-P1P2	GGTCGGCGCCGCGTGCGGGC	1.0	6.0	empirical	PPA1_+_71993075.23-P1P2	CTCATAGTGCCGGAGTCCTC	2.0	2.0	empirical	PPA1_+_71993121.23-P1P2|PPA1_+_71993075.23-P1P2
RPS20	P1P2	1-2	essential	RPS20_+_56987038.23-P1P2	GTGAGGAAGACGCGGTCGTA	1.0	1.0	essential	RPS20_+_56986933.23-P1P2	CACCATGGCTGTTGCGCGCC	2.0	5.0	essential	RPS20_+_56987038.23-P1P2|RPS20_+_56986933.23-P1P2
NCAPG2	P1P2	1-2	significant	NCAPG2_+_158497431.23-P1P2	GCTGGTCCGAGCGCGGGAAA	1.0	3.0	empirical	NCAPG2_+_158497428.23-P1P2	CCGTTTCCCGCGCTCGGACC	2.0	1.0	empirical	NCAPG2_+_158497431.23-P1P2|NCAPG2_+_158497428.23-P1P2
PPIE	P1P2	1-2	essential	PPIE_+_40204766.23-P1P2	GTGAGGACAGTGGGAAACCT	1.0	9.0	essential	PPIE_-_40204965.23-P1P2	GAGGTGTGTGGCAAGGCTGC	2.0	10.0	essential	PPIE_+_40204766.23-P1P2|PPIE_-_40204965.23-P1P2
MRPL38	P1P2	1-2	significant	MRPL38_-_73900966.23-P1P2	GGGCGCCGCCATCTTCCCTC	1.0	3.0	empirical	MRPL38_+_73900952.23-P1P2	TCTTCCCTCCGGCCTGCGAC	2.0	1.0	empirical	MRPL38_-_73900966.23-P1P2|MRPL38_+_73900952.23-P1P2
GINS4	P1P2	1-2	significant	GINS4_-_41386785.23-P1P2	GAGAAGTTGCAGGGTTGAGT	1.0	6.0	empirical	GINS4_+_41386860.23-P1P2	CGTCCTTACCGCCGGCTGCC	2.0	6.0	empirical	GINS4_-_41386785.23-P1P2|GINS4_+_41386860.23-P1P2
CCNH	P1P2	1-2	significant	CCNH_+_86708689.23-P1P2	GTCCGCGAGATCTTCGGTGG	1.0	1.0	empirical	CCNH_-_86708719.23-P1P2	TAGGCTTCCGCGAGATCTTC	2.0	3.0	empirical	CCNH_+_86708689.23-P1P2|CCNH_-_86708719.23-P1P2
LETM1	P1P2	1-2	significant	LETM1_-_1857844.23-P1P2	GCTCAAGGACCCGGCACCAG	1.0	2.0	empirical	LETM1_-_1857794.23-P1P2	CTGTCAGCCGTCCGCGCGGC	2.0	5.0	empirical	LETM1_-_1857844.23-P1P2|LETM1_-_1857794.23-P1P2
SNW1	P2	1-2	essential	SNW1_+_78221331.23-P2	GCCCCGTACGGATACCGGAA	1.0	1.0	predicted	SNW1_+_78221318.23-P2	AGGTATCCAGCCTTTCCGGC	2.0	2.0	predicted	SNW1_+_78221331.23-P2|SNW1_+_78221318.23-P2
CHTF8	P1P2	1-2	nonessential	CHTF8_+_69166252.23-P1P2	GCGCGGCTCGGAGAGAAGAA	1.0	1.0	predicted	CHTF8_-_69166513.23-P1P2	CGGAAGTGCTCCTGGCGCAC	2.0	2.0	predicted	CHTF8_+_69166252.23-P1P2|CHTF8_-_69166513.23-P1P2
RNMT	P1P2	1-2	significant	RNMT_-_13726752.23-P1P2	GAGTGTGACGGCTGGAACTC	1.0	1.0	empirical	RNMT_+_13726813.23-P1P2	CTGACATGGGCTCACTTCGC	2.0	2.0	empirical	RNMT_-_13726752.23-P1P2|RNMT_+_13726813.23-P1P2
VHL	P1P2	1-2	significant	VHL_-_10183543.23-P1P2	GGCGGAGGGAATGCCCCGGA	1.0	1.0	empirical	VHL_-_10183539.23-P1P2	GGGCATTCCCTCCGCGATCC	2.0	4.0	empirical	VHL_-_10183543.23-P1P2|VHL_-_10183539.23-P1P2
SRFBP1	P1P2	1-2	essential	SRFBP1_-_121297703.23-P1P2	GCCGGTTCACGTGCAGGCAG	1.0	1.0	essential	SRFBP1_+_121297913.23-P1P2	GTAATTTCCCTTTTCGGTCC	2.0	9.0	essential	SRFBP1_-_121297703.23-P1P2|SRFBP1_+_121297913.23-P1P2
WDR5	P1P2	1-2	essential	WDR5_+_137001233.23-P1P2	GCGGACTCAGCTCGACAAGG	1.0	4.0	essential	WDR5_+_137001236.23-P1P2	TGTCGAGCTGAGTCCGCGCC	2.0	3.0	essential	WDR5_+_137001233.23-P1P2|WDR5_+_137001236.23-P1P2
ANAPC2	P1P2	1-2	essential	ANAPC2_+_140082989.23-P1P2	GAGCGAATCTCGGAGTCGGT	1.0	3.0	essential	ANAPC2_+_140082980.23-P1P2	TCTGCACCCACCGACTCCGC	2.0	5.0	essential	ANAPC2_+_140082989.23-P1P2|ANAPC2_+_140082980.23-P1P2
COQ2	P1P2	1-2	significant	COQ2_+_84205909.23-P1P2	GGCCTCACCAGCGCCATGCT	1.0	4.0	empirical	COQ2_-_84205900.23-P1P2	CGGGGTTCGCGCGGGGCCTC	2.0	1.0	empirical	COQ2_+_84205909.23-P1P2|COQ2_-_84205900.23-P1P2
GAPDH	P1	1-2	significant	GAPDH_-_6643761.23-P1	GGACGGGCGGAGAGAAACCC	1.0	3.0	empirical	GAPDH_-_6643770.23-P1	TAGCCTCCCGGGTTTCTCTC	2.0	4.0	empirical	GAPDH_-_6643761.23-P1|GAPDH_-_6643770.23-P1
WDR83OS	P1P2	1-2	nonessential	WDR83OS_+_12780184.23-P1P2	GCAATATGTCGGACCCACGG	1.0	1.0	predicted	WDR83OS_+_12780145.23-P1P2	ACGACGCTGGGGTCCTCACC	2.0	2.0	predicted	WDR83OS_+_12780184.23-P1P2|WDR83OS_+_12780145.23-P1P2
DDX49	P1P2	1-2	significant	DDX49_-_19030553.23-P1P2	GCTACAAGCGGCCACAAGGA	1.0	1.0	empirical	DDX49_-_19030541.23-P1P2	CTTGTAGGGGCCCCTTGTAC	2.0	4.0	empirical	DDX49_-_19030553.23-P1P2|DDX49_-_19030541.23-P1P2
SEC61B	P1P2	1-2	significant	SEC61B_+_101984577.23-P1P2	GTACGGAGCCCCCGAAAGAC	1.0	1.0	empirical	SEC61B_-_101984591.23-P1P2	CCGAAAGACCGGCAGCTGGC	2.0	3.0	empirical	SEC61B_+_101984577.23-P1P2|SEC61B_-_101984591.23-P1P2
ZNF207	P2	1-2	significant	ZNF207_+_30687693.23-P2	GGCTGAGGTTGAACAGGCTG	1.0	1.0	predicted	ZNF207_+_30687708.23-P2	CAGCAAGGTTATATTCCTCC	2.0	2.0	predicted	ZNF207_+_30687693.23-P2|ZNF207_+_30687708.23-P2
LIN54	P2	1-2	nonessential	LIN54_+_83931965.23-P2	GAGGGGGAGGTTACTGGTGG	1.0	1.0	predicted	LIN54_+_83931898.23-P2	CGTCATCACCATCACAGCTC	2.0	2.0	predicted	LIN54_+_83931965.23-P2|LIN54_+_83931898.23-P2
RNGTT	P1P2	1-2	significant	RNGTT_-_89673283.23-P1P2	GATCCGGGTAACGTCAGGGG	1.0	4.0	empirical	RNGTT_-_89673280.23-P1P2	CTGACGTTACCCGGATCGGC	2.0	3.0	empirical	RNGTT_-_89673283.23-P1P2|RNGTT_-_89673280.23-P1P2
POLR1C	P1	1-2	significant	POLR1C_-_43484871.23-P1	GGCGGCTTCTCAGGCGGTGG	1.0	1.0	empirical	POLR1C_-_43484868.23-P1	CCGCCTGAGAAGCCGCCATC	2.0	6.0	empirical	POLR1C_-_43484871.23-P1|POLR1C_-_43484868.23-P1
TAF1C	P1P2	1-2	significant	TAF1C_+_84220626.23-P1P2	GACCGTGGGTAGCTGCGGCG	1.0	4.0	empirical	TAF1C_-_84220621.23-P1P2	GTCCCGAGTGCCAAAGCTGC	2.0	5.0	empirical	TAF1C_+_84220626.23-P1P2|TAF1C_-_84220621.23-P1P2
CMPK1	P1P2	1-2	significant	CMPK1_+_47799589.23-P1P2	GCGCCTCGGCCGGACGCTGA	1.0	1.0	empirical	CMPK1_+_47799577.23-P1P2	CTGTCAGCTCCCTCAGCGTC	2.0	2.0	empirical	CMPK1_+_47799589.23-P1P2|CMPK1_+_47799577.23-P1P2
BIRC5	P1P2	1-2	essential	BIRC5_-_76210386.23-P1P2	GCGGGACCCGTTGGCAGAGG	1.0	2.0	essential	BIRC5_+_76210725.23-P1P2	CGTCCACTCACGAGCTGTGC	2.0	7.0	essential	BIRC5_-_76210386.23-P1P2|BIRC5_+_76210725.23-P1P2
PAM16	P1P2	1-2	essential	PAM16_+_4401248.23-P1P2	GGTCGGAGTTTGAGCCCCGG	1.0	2.0	essential	PAM16_-_4401236.23-P1P2	TGGTGAGCCCCGAGTCGGGC	2.0	1.0	essential	PAM16_+_4401248.23-P1P2|PAM16_-_4401236.23-P1P2
SDAD1	P1P2	1-2	essential	SDAD1_+_76912051.23-P1P2	GGCAGCTGGCAGGGATTGCG	1.0	4.0	essential	SDAD1_+_76911899.23-P1P2	ACCTCCTCGATGTAGGCCGC	2.0	8.0	essential	SDAD1_+_76912051.23-P1P2|SDAD1_+_76911899.23-P1P2
OSBP	P1P2	1-2	significant	OSBP_+_59383170.23-P1P2	GCGACGGCGGCTCTCGTAGG	1.0	6.0	empirical	OSBP_-_59383167.23-P1P2	GTCTTGTATCTCCAGGCGGC	2.0	4.0	empirical	OSBP_+_59383170.23-P1P2|OSBP_-_59383167.23-P1P2
ZMAT2	P1	1-2	essential	ZMAT2_-_140080084.23-P1	GGTAGGTGTTGTGTCTGAGG	1.0	2.0	essential	ZMAT2_-_140080067.23-P1	ACCCCGCTGCCCGACGCCAC	2.0	4.0	essential	ZMAT2_-_140080084.23-P1|ZMAT2_-_140080067.23-P1
TADA3	P1P2	1-2	significant	TADA3_+_9834144.23-P1P2	GCCCATAGCCAGTTCCGGGG	1.0	5.0	empirical	TADA3_-_9834393.23-P1P2	ACCCGCAGCTCCTGGCGCTC	2.0	4.0	empirical	TADA3_+_9834144.23-P1P2|TADA3_-_9834393.23-P1P2
PPIL1	P1P2	1-2	significant	PPIL1_+_36842544.23-P1P2	GTCCGCCGCCGGCTTCGCTA	1.0	2.0	empirical	PPIL1_-_36842357.23-P1P2	CCAGAGGGTTGAGAGGGGAC	2.0	8.0	empirical	PPIL1_+_36842544.23-P1P2|PPIL1_-_36842357.23-P1P2
MRPS12	P1P2	1-2	essential	MRPS12_+_39421616.23-P1P2	GCTCACAGGACCTAAAGGTG	1.0	4.0	essential	MRPS12_+_39421621.23-P1P2	TTAGGTCCTGTGAGGTCGGC	2.0	3.0	essential	MRPS12_+_39421616.23-P1P2|MRPS12_+_39421621.23-P1P2
PHB2	P1P2	1-2	essential	PHB2_+_7079788.23-P1P2	GGGCCCGAACCCTCGTGTGA	1.0	2.0	essential	PHB2_-_7079800.23-P1P2	CGTGTGAAGGGTGCAGTACC	2.0	7.0	essential	PHB2_+_7079788.23-P1P2|PHB2_-_7079800.23-P1P2
DPY19L2	P1P2	1-2	nonessential	DPY19L2_+_64062235.23-P1P2	GCAGGCGAGTCAGGTCTCTC	1.0	1.0	predicted	DPY19L2_-_64062190.23-P1P2	CCATACTCCTTGATTATGAC	2.0	2.0	predicted	DPY19L2_+_64062235.23-P1P2|DPY19L2_-_64062190.23-P1P2
RPL19	P1P2	1-2	essential	RPL19_-_37356608.23-P1P2	GGGCCGCAGCCATGAGGTGA	1.0	3.0	essential	RPL19_+_37356595.23-P1P2	TGAGGTGAGGGCGAGCTGGC	2.0	1.0	essential	RPL19_-_37356608.23-P1P2|RPL19_+_37356595.23-P1P2
HNRNPH1	P1P2	1-2	nonessential	HNRNPH1_+_179050622.23-P1P2	GGTGTCTAGGTGAGTCGCGG	1.0	1.0	predicted	HNRNPH1_-_179050392.23-P1P2	CTACGCTGGCTCTCGGCCCC	2.0	2.0	predicted	HNRNPH1_+_179050622.23-P1P2|HNRNPH1_-_179050392.23-P1P2
MRPL27	P1P2	1-2	significant	MRPL27_-_48450272.23-P1P2	GGAACCCGTCCGTGCTGCTG	1.0	7.0	empirical	MRPL27_+_48450512.23-P1P2	ACACCACCGACGCCATGCTC	2.0	5.0	empirical	MRPL27_-_48450272.23-P1P2|MRPL27_+_48450512.23-P1P2
BRD4	ENST00000263377.2,ENST00000371835.4	1-2	nonessential	BRD4_-_15391173.23-ENST00000263377.2,ENST00000371835.4	GACTTTGCTGTACCCATCAG	1.0	1.0	predicted	BRD4_-_15391126.23-ENST00000263377.2,ENST00000371835.4	GTGTAGGATGACTGGGCCTC	2.0	2.0	predicted	BRD4_-_15391173.23-ENST00000263377.2,ENST00000371835.4|BRD4_-_15391126.23-ENST00000263377.2,ENST00000371835.4
ATP6V0D1	P1P2	1-2	significant	ATP6V0D1_-_67515053.23-P1P2	GGCACGAATCGCGACTCCCC	1.0	2.0	empirical	ATP6V0D1_-_67515028.23-P1P2	GTCCTGGTTCTCCGGTCCCC	2.0	1.0	empirical	ATP6V0D1_-_67515053.23-P1P2|ATP6V0D1_-_67515028.23-P1P2
HNRNPR	P1P2	1-2	significant	HNRNPR_-_23670718.23-P1P2	GACTCACCAGGGCAGAGCGG	1.0	2.0	empirical	HNRNPR_-_23670707.23-P1P2	TGGTGAGTCTCGCGCCGGCC	2.0	1.0	empirical	HNRNPR_-_23670718.23-P1P2|HNRNPR_-_23670707.23-P1P2
NEDD1	P1P2	1-2	essential	NEDD1_-_97301083.23-P1P2	GGTGTTGCTGCGGAGAGGTG	1.0	4.0	essential	NEDD1_-_97301092.23-P1P2	CCGGAACCTCACCTCTCCGC	2.0	5.0	essential	NEDD1_-_97301083.23-P1P2|NEDD1_-_97301092.23-P1P2
THOC5	P1P2	1-2	essential	THOC5_-_29949679.23-P1P2	GCCTCACAGCTCCAAGAACC	1.0	3.0	essential	THOC5_-_29949705.23-P1P2	CCGGCAGTGGCTTACTCCCC	2.0	2.0	essential	THOC5_-_29949679.23-P1P2|THOC5_-_29949705.23-P1P2
COX17	P1P2	1-2	significant	COX17_-_119396037.23-P1P2	GTCGTCGGCCGCGCCCTCTC	1.0	5.0	empirical	COX17_-_119395995.23-P1P2	TCCGGTGCCTCTGCCCTACC	2.0	3.0	empirical	COX17_-_119396037.23-P1P2|COX17_-_119395995.23-P1P2
SYMPK	P1P2	1-2	significant	SYMPK_+_46366344.23-P1P2	GAGGAAGAGGCACTGCTGAG	1.0	4.0	empirical	SYMPK_+_46366386.23-P1P2	CCATCTTCCGTTCGTCGCCC	2.0	1.0	empirical	SYMPK_+_46366344.23-P1P2|SYMPK_+_46366386.23-P1P2
PPP4C	P1P2	1-2	significant	PPP4C_-_30087373.23-P1P2	GTCGAAAGCGGAGTGAAAGA	1.0	3.0	empirical	PPP4C_-_30087361.23-P1P2	CTTTCGACCGCCGCCGCCGC	2.0	2.0	empirical	PPP4C_-_30087373.23-P1P2|PPP4C_-_30087361.23-P1P2
PDCD2	P1P2	1-2	significant	PDCD2_-_170893673.23-P1P2	GGCCCCGGCGGCAGCCATGC	1.0	2.0	empirical	PDCD2_+_170893697.23-P1P2	ACAGCTGGGTCGGAAGGCGC	2.0	1.0	empirical	PDCD2_-_170893673.23-P1P2|PDCD2_+_170893697.23-P1P2
FXN	P1P2	1-2	significant	FXN_+_71650715.23-P1P2	GCAGGAGGCCGGCTACTGCG	1.0	1.0	empirical	FXN_+_71650730.23-P1P2	CCTGGCGTCACCCAGCCCAC	2.0	4.0	empirical	FXN_+_71650715.23-P1P2|FXN_+_71650730.23-P1P2
PSMD6	P1P2	1-2	essential	PSMD6_-_64009133.23-P1P2	GCGGCTGACAGGACACAACT	1.0	5.0	essential	PSMD6_-_64009114.23-P1P2	CTGTCCCCTTCGCCGCGATC	2.0	3.0	essential	PSMD6_-_64009133.23-P1P2|PSMD6_-_64009114.23-P1P2
RNF123	P1P2	1-2	nonessential	RNF123_-_49727026.23-P1P2	GGTTGTGAGCCGGGTCGCTG	1.0	1.0	predicted	RNF123_-_49727542.23-P1P2	TTGTGGGTCTGCACCACGCC	2.0	2.0	predicted	RNF123_-_49727026.23-P1P2|RNF123_-_49727542.23-P1P2
MKRN1	P1P2	1-2	nonessential	MKRN1_+_140179259.23-P1P2	GTAGCAGGCGGGGACCGAAC	1.0	1.0	predicted	MKRN1_+_140179306.23-P1P2	CTTCAACTGCGGGCCCAGAC	2.0	2.0	predicted	MKRN1_+_140179259.23-P1P2|MKRN1_+_140179306.23-P1P2
POLR1C	P2	1-2	significant	POLR1C_-_43477509.23-P2	GGGCTCCCCCGAAATCTGGA	1.0	1.0	predicted	POLR1C_+_43477492.23-P2	CCGAAATCTGGATGGAGCTC	2.0	2.0	predicted	POLR1C_-_43477509.23-P2|POLR1C_+_43477492.23-P2
VPS13D	P1P2	1-2	significant	VPS13D_-_12290177.23-P1P2	GGGCGGCCCGGGACACCGAC	1.0	2.0	empirical	VPS13D_+_12290170.23-P1P2	ACAGGTAGGGGCCGAGCGGC	2.0	3.0	empirical	VPS13D_-_12290177.23-P1P2|VPS13D_+_12290170.23-P1P2
DNAJC17	P1P2	1-2	significant	DNAJC17_-_41099633.23-P1P2	GTCCATCTGTAAGAGCTCCT	1.0	1.0	empirical	DNAJC17_+_41099640.23-P1P2	TGGTTCCGGCCTGACGGATC	2.0	2.0	empirical	DNAJC17_-_41099633.23-P1P2|DNAJC17_+_41099640.23-P1P2
SEC16A	P1P2	1-2	nonessential	SEC16A_+_139377476.23-P1P2	GCGAGCCGGATGTGCCAAGA	1.0	1.0	predicted	SEC16A_-_139377484.23-P1P2	AGATGGCTGCGGCGGCTGAC	2.0	2.0	predicted	SEC16A_+_139377476.23-P1P2|SEC16A_-_139377484.23-P1P2
LSM3	P1P2	1-2	significant	LSM3_-_14220381.23-P1P2	GATGGCGGACGACGTAGACC	1.0	3.0	empirical	LSM3_+_14220565.23-P1P2	ACCTGATGACTATTCTCACC	2.0	4.0	empirical	LSM3_-_14220381.23-P1P2|LSM3_+_14220565.23-P1P2
PSMG3	P2	1-2	significant	PSMG3_+_1610218.23-P2	GGGAGCGCCCGAGGGACGGT	1.0	8.0	empirical	PSMG3_+_1610222.23-P2	TCCCTCGGGCGCTCCGTGAC	2.0	5.0	empirical	PSMG3_+_1610218.23-P2|PSMG3_+_1610222.23-P2
TUT1	P1	1-2	significant	TUT1_+_62358999.23-P1	GTTGGCGAAGTGGGTTCCGG	1.0	6.0	empirical	TUT1_+_62358953.23-P1	TAGCGACTCTCCTGTACCGC	2.0	1.0	empirical	TUT1_+_62358999.23-P1|TUT1_+_62358953.23-P1
GPN3	P1P2	1-2	essential	GPN3_-_110906004.23-P1P2	GTGACCAGCTGCGCATACCG	1.0	4.0	essential	GPN3_+_110906029.23-P1P2	CACTCCCTTAGCCTTCGCGC	2.0	1.0	essential	GPN3_-_110906004.23-P1P2|GPN3_+_110906029.23-P1P2
HSPA8	P1P2	1-2	significant	HSPA8_-_122932776.23-P1P2	GTGAGCAGAGGTTTTACCTG	1.0	7.0	empirical	HSPA8_+_122933024.23-P1P2	CGCTCCGCCTCACGATAACC	2.0	2.0	empirical	HSPA8_-_122932776.23-P1P2|HSPA8_+_122933024.23-P1P2
COPS4	P1P2	1-2	essential	COPS4_-_83956572.23-P1P2	GGCCGGCCTGACGTCCAAGG	1.0	2.0	essential	COPS4_-_83956404.23-P1P2	AATCCTGTCGCACGGCTGCC	2.0	1.0	essential	COPS4_-_83956572.23-P1P2|COPS4_-_83956404.23-P1P2
SURF6	P1P2	1-2	essential	SURF6_+_136202983.23-P1P2	GGGAAGGTGTGAGTCGTGAA	1.0	2.0	essential	SURF6_-_136202973.23-P1P2	CCATGGCCTCTCTACTCGCC	2.0	1.0	essential	SURF6_+_136202983.23-P1P2|SURF6_-_136202973.23-P1P2
PPP1R15B	P1P2	1-2	significant	PPP1R15B_-_204380704.23-P1P2	GCCACAGAGGGCAGCGAATG	1.0	6.0	empirical	PPP1R15B_-_204380714.23-P1P2	CCCGCTGCCGCATTCGCTGC	2.0	1.0	empirical	PPP1R15B_-_204380704.23-P1P2|PPP1R15B_-_204380714.23-P1P2
RPP14	P1P2	1-2	significant	RPP14_+_58292248.23-P1P2	GTCAGCGCCCGGGGTCGGAG	1.0	1.0	empirical	RPP14_+_58292286.23-P1P2	CGTAGGGTCTCGGCCGCAGC	2.0	2.0	empirical	RPP14_+_58292248.23-P1P2|RPP14_+_58292286.23-P1P2
TBCA	P1P2	1-2	significant	TBCA_+_77072022.23-P1P2	GCCGGCGTGGTGAAGCGGTA	1.0	1.0	empirical	TBCA_-_77071772.23-P1P2	GGTTTCTCGGCGCCCGCGGC	2.0	2.0	empirical	TBCA_+_77072022.23-P1P2|TBCA_-_77071772.23-P1P2
TSG101	P1P2	1-2	significant	TSG101_-_18548267.23-P1P2	GGGCCGGGACGGACTCGACA	1.0	2.0	empirical	TSG101_+_18548431.23-P1P2	ACACAATCGCACACCCCCAC	2.0	3.0	empirical	TSG101_-_18548267.23-P1P2|TSG101_+_18548431.23-P1P2
TRNT1	P1P2	1-2	significant	TRNT1_-_3168701.23-P1P2	GGGGCGCGCGCCGCTCAGAG	1.0	1.0	empirical	TRNT1_+_3168671.23-P1P2	GTAAGCGGGCGCGCGCCGCC	2.0	3.0	empirical	TRNT1_-_3168701.23-P1P2|TRNT1_+_3168671.23-P1P2
ZMAT5	P1P2	1-2	essential	ZMAT5_+_30162943.23-P1P2	GCCCGGAGCTGCAGCCACCG	1.0	4.0	essential	ZMAT5_-_30162951.23-P1P2	CCGGGGAGCCAGGTACCTTC	2.0	2.0	essential	ZMAT5_+_30162943.23-P1P2|ZMAT5_-_30162951.23-P1P2
CHCHD1	P1P2	1-2	significant	CHCHD1_-_75541863.23-P1P2	GCCCAGCCTGCGGGGTCGTC	1.0	3.0	empirical	CHCHD1_-_75541853.23-P1P2	CAGGCTGGGTGTCGCCATAC	2.0	5.0	empirical	CHCHD1_-_75541863.23-P1P2|CHCHD1_-_75541853.23-P1P2
BCLAF1	P1P2	1-2	significant	BCLAF1_+_136610935.23-P1P2	GCGCGTCGAAGGTAGCTCTA	1.0	3.0	empirical	BCLAF1_-_136610528.23-P1P2	GTACCTCTGCGCGCGCCCGC	2.0	4.0	empirical	BCLAF1_+_136610935.23-P1P2|BCLAF1_-_136610528.23-P1P2
TUBGCP6	P1P2	1-2	significant	TUBGCP6_+_50683388.23-P1P2	GAGCCGTGGGCACTTTCCAC	1.0	2.0	empirical	TUBGCP6_-_50683394.23-P1P2	CGGGTGAGGCCTGGAGAACC	2.0	5.0	empirical	TUBGCP6_+_50683388.23-P1P2|TUBGCP6_-_50683394.23-P1P2
IFITM2	P1P2	1-2	significant	IFITM2_+_308180.23-P1P2	GTGTGGTTCATGGTGACCAG	1.0	1.0	empirical	IFITM2_+_308197.23-P1P2	CATTGTGCAAACCTTCTCTC	2.0	2.0	empirical	IFITM2_+_308180.23-P1P2|IFITM2_+_308197.23-P1P2
UTP23	P1P2	1-2	significant	UTP23_-_117778780.23-P1P2	GACTGGCATTGAGGGTACTG	1.0	2.0	empirical	UTP23_+_117778813.23-P1P2	GTGGCCTCGGTCCCGGTAAC	2.0	4.0	empirical	UTP23_-_117778780.23-P1P2|UTP23_+_117778813.23-P1P2
TMEM240	P1P2	1-2	nonessential	TMEM240_+_1475962.23-P1P2	GCATCGCAGGGAGGACCCGA	1.0	1.0	predicted	TMEM240_+_1475971.23-P1P2	CCCTGCGATGCGCTCGGCTC	2.0	2.0	predicted	TMEM240_+_1475962.23-P1P2|TMEM240_+_1475971.23-P1P2
OVCA2	P1P2	1-2	nonessential	OVCA2_+_1945367.23-P1P2	GCCGGAAGCCCGCCAGGCAC	1.0	1.0	predicted	OVCA2_+_1945406.23-P1P2	TGAGAAGACCGGGGCGCTGC	2.0	2.0	predicted	OVCA2_+_1945367.23-P1P2|OVCA2_+_1945406.23-P1P2
NUDCD3	P1P2	1-2	essential	NUDCD3_+_44530211.23-P1P2	GGTGTGTGTGAAGCGTACCT	1.0	1.0	essential	NUDCD3_+_44530237.23-P1P2	CCTCAGACCTGCCGACTGGC	2.0	4.0	essential	NUDCD3_+_44530211.23-P1P2|NUDCD3_+_44530237.23-P1P2
PRODH	P2	1-2	nonessential	PRODH_+_18905892.23-P2	GGCCCAGGAGCGAGCCCGTG	1.0	1.0	predicted	PRODH_+_18905874.23-P2	CATAGCCGATCTCTGCCGCC	2.0	2.0	predicted	PRODH_+_18905892.23-P2|PRODH_+_18905874.23-P2
USP8	P1P2	1-2	significant	USP8_+_50716821.23-P1P2	GGTTGTCCCACTCCTCTCCG	1.0	1.0	empirical	USP8_-_50716851.23-P1P2	TTAGGAGTTGTCCCACTCCC	2.0	2.0	empirical	USP8_+_50716821.23-P1P2|USP8_-_50716851.23-P1P2
TAF10	P1P2	1-2	significant	TAF10_-_6633436.23-P1P2	GCTCATCGGGCCGGTGGGAG	1.0	2.0	empirical	TAF10_+_6633406.23-P1P2	CTGCAGCTCATCGGGCCGGC	2.0	1.0	empirical	TAF10_-_6633436.23-P1P2|TAF10_+_6633406.23-P1P2
C1orf109	P1	1-2	nonessential	C1orf109_+_38156159.23-P1	GCGCGTGGTGCAGTCCCTGG	1.0	1.0	predicted	C1orf109_-_38156166.23-P1	GGAGGGTTCTCACGCTTTGC	2.0	2.0	predicted	C1orf109_+_38156159.23-P1|C1orf109_-_38156166.23-P1
DDX1	P1P2	1-2	significant	DDX1_-_15732017.23-P1P2	GCACGCCGTGTCAGTCGGGA	1.0	6.0	empirical	DDX1_-_15732021.23-P1P2	TCCCTCCCGACTGACACGGC	2.0	4.0	empirical	DDX1_-_15732017.23-P1P2|DDX1_-_15732021.23-P1P2
VPS35	P1P2	1-2	significant	VPS35_+_46723052.23-P1P2	GCTGCTTGCTGCAGGCTCTG	1.0	2.0	empirical	VPS35_+_46723041.23-P1P2	TGGCGACTCCCCAGAGCCTC	2.0	1.0	empirical	VPS35_+_46723052.23-P1P2|VPS35_+_46723041.23-P1P2
ZNF658	ENST00000377626.3,ENST00000602553.1	1-2	nonessential	ZNF658_+_40791787.23-ENST00000377626.3,ENST00000602553.1	GCGGGAAGAGGAAATGTGCG	1.0	1.0	predicted	ZNF658_+_40791781.23-ENST00000377626.3,ENST00000602553.1	CATCCACGCACATTTCCTCC	2.0	2.0	predicted	ZNF658_+_40791787.23-ENST00000377626.3,ENST00000602553.1|ZNF658_+_40791781.23-ENST00000377626.3,ENST00000602553.1
DOHH	P1P2	1-2	significant	DOHH_+_3500631.23-P1P2	GGACCGCACTGCGGGCGTCG	1.0	3.0	empirical	DOHH_-_3500585.23-P1P2	ACGGGTCCTGAGTCTCCAGC	2.0	7.0	empirical	DOHH_+_3500631.23-P1P2|DOHH_-_3500585.23-P1P2
MRPL54	P1P2	1-2	significant	MRPL54_+_3762727.23-P1P2	GCCCCCAGCCGGCCCACGTC	1.0	1.0	empirical	MRPL54_+_3762712.23-P1P2	TTTCGGGGCTACCCGGACGC	2.0	3.0	empirical	MRPL54_+_3762727.23-P1P2|MRPL54_+_3762712.23-P1P2
EXOSC10	P1P2	1-2	significant	EXOSC10_-_11159878.23-P1P2	GCCCTGGGCTCCCGGGTACT	1.0	5.0	empirical	EXOSC10_-_11159881.23-P1P2	CCCAGTACCCGGGAGCCCAC	2.0	3.0	empirical	EXOSC10_-_11159878.23-P1P2|EXOSC10_-_11159881.23-P1P2
DERL2	P1P2	1-2	essential	DERL2_-_5389442.23-P1P2	GGTAGGCGCGGCTGACCGGT	1.0	1.0	essential	DERL2_+_5389484.23-P1P2	CACCGTCGCCTGCCCCACCC	2.0	3.0	essential	DERL2_-_5389442.23-P1P2|DERL2_+_5389484.23-P1P2
PWP1	P1P2	1-2	significant	PWP1_+_108079592.23-P1P2	GCACTGCTGCCACACGCTCA	1.0	1.0	empirical	PWP1_+_108079624.23-P1P2	TCCCTATGCAGCCTGGTTTC	2.0	4.0	empirical	PWP1_+_108079592.23-P1P2|PWP1_+_108079624.23-P1P2
HARS	P1P2	1-2	essential	HARS_+_140070923.23-P1P2	GAGGCTGGGGCAACCACCGC	1.0	4.0	essential	HARS_+_140070910.23-P1P2	GCTGTCTCGACCTGCGGTGC	2.0	3.0	essential	HARS_+_140070923.23-P1P2|HARS_+_140070910.23-P1P2
CENPK	P1P2	1-2	significant	CENPK_+_64858943.23-P1P2	GGCGCAGCGCCTAGGCGACC	1.0	1.0	empirical	CENPK_+_64858912.23-P1P2	AGGTCTTACCATCACAGCGC	2.0	4.0	empirical	CENPK_+_64858943.23-P1P2|CENPK_+_64858912.23-P1P2
OLFML3	P1P2	1-2	nonessential	OLFML3_-_114522086.23-P1P2	GGCTAACCCTCGGGCTTGAG	1.0	1.0	predicted	OLFML3_-_114522092.23-P1P2	CTTCCCCTCAAGCCCGAGGC	2.0	2.0	predicted	OLFML3_-_114522086.23-P1P2|OLFML3_-_114522092.23-P1P2
IK	P2	1-2	essential	IK_-_140038581.23-P2	GACCAAGACACCTCGGGACA	1.0	1.0	predicted	IK_+_140038551.23-P2	TCCACAACCAAGACACCTCC	2.0	2.0	predicted	IK_-_140038581.23-P2|IK_+_140038551.23-P2
SEC61G	P1P2	1-2	significant	SEC61G_-_54826545.23-P1P2	GAGCCAACCCCGAAGGGATC	1.0	7.0	empirical	SEC61G_+_54826873.23-P1P2	GGGACACGTAGCACTGGAGC	2.0	4.0	empirical	SEC61G_-_54826545.23-P1P2|SEC61G_+_54826873.23-P1P2
SUGT1	P1P2	1-2	significant	SUGT1_+_53227010.23-P1P2	GGCCGGAGCTGCTACTATCA	1.0	1.0	empirical	SUGT1_-_53227058.23-P1P2	TCCCTCGTAGTCGCTGTTGC	2.0	2.0	empirical	SUGT1_+_53227010.23-P1P2|SUGT1_-_53227058.23-P1P2
ANKS6	P1P2	1-2	significant	ANKS6_+_101558408.23-P1P2	GTCATGCAGGCGGCCAGGTG	1.0	9.0	empirical	ANKS6_-_101558384.23-P1P2	GAGTGGTGCCCGGCGCTGGC	2.0	5.0	empirical	ANKS6_+_101558408.23-P1P2|ANKS6_-_101558384.23-P1P2
ALG11	P1P2	1-2	significant	ALG11_+_52586530.23-P1P2	GTCCGCCGACCCCCGAACTC	1.0	6.0	empirical	ALG11_-_52586543.23-P1P2	CCGAACTCAGGAAACGCTTC	2.0	3.0	empirical	ALG11_+_52586530.23-P1P2|ALG11_-_52586543.23-P1P2
ARPC2	P1	1-2	significant	ARPC2_-_219081923.23-P1	GACCGGGCTTGTCGGTGAAG	1.0	1.0	empirical	ARPC2_-_219081929.23-P1	CTGCCGCTTCACCGACAAGC	2.0	2.0	empirical	ARPC2_-_219081923.23-P1|ARPC2_-_219081929.23-P1
RPL28	P1P2	1-2	significant	RPL28_+_55897540.23-P1P2	GGGCGGGACTGAGTGACCTA	1.0	5.0	empirical	RPL28_-_55897357.23-P1P2	CGCGAGGAAGACGAACGCTC	2.0	2.0	empirical	RPL28_+_55897540.23-P1P2|RPL28_-_55897357.23-P1P2
DYNLRB1	P1	1-2	essential	DYNLRB1_-_33104256.23-P1	GCTACGCGGGGCTACCGGAT	1.0	3.0	essential	DYNLRB1_-_33104419.23-P1	CCCTCAAGTCGGCTGGGGCC	2.0	7.0	essential	DYNLRB1_-_33104256.23-P1|DYNLRB1_-_33104419.23-P1
IPO13	P1P2	1-2	essential	IPO13_-_44412643.23-P1P2	GCTTGTCTTGTCAGTCACTG	1.0	3.0	essential	IPO13_-_44412666.23-P1P2	CGCTACAGCCGCTGCCTCCC	2.0	2.0	essential	IPO13_-_44412643.23-P1P2|IPO13_-_44412666.23-P1P2
WDR46	P1P2	1-2	essential	WDR46_+_33256781.23-P1P2	GGATGTGCCTGTAGAAACCG	1.0	9.0	essential	WDR46_+_33256771.23-P1P2	AGTATCGCCGCGGTTTCTAC	2.0	7.0	essential	WDR46_+_33256781.23-P1P2|WDR46_+_33256771.23-P1P2
PSMB3	P1P2	1-2	nonessential	PSMB3_-_36909230.23-P1P2	GGCCCCGGTGAGGACCAAGA	1.0	1.0	predicted	PSMB3_-_36909059.23-P1P2	TCGATCGCCAGAGCAATTCC	2.0	2.0	predicted	PSMB3_-_36909230.23-P1P2|PSMB3_-_36909059.23-P1P2
YPEL1	P1P2	1-2	nonessential	YPEL1_-_22090031.23-P1P2	GGGCCGTTAACGCCTAGGCA	1.0	1.0	predicted	YPEL1_-_22090026.23-P1P2	AGGCGTTAACGGCCTCAGCC	2.0	2.0	predicted	YPEL1_-_22090031.23-P1P2|YPEL1_-_22090026.23-P1P2
CUL3	P1P2	1-2	significant	CUL3_-_225449997.23-P1P2	GGTCCCCCTCACGTCCGGCT	1.0	4.0	empirical	CUL3_-_225450135.23-P1P2	CCCTCTGGGCCGGATCTCGC	2.0	6.0	empirical	CUL3_-_225449997.23-P1P2|CUL3_-_225450135.23-P1P2
NCKAP1	P1P2	1-2	significant	NCKAP1_+_183902661.23-P1P2	GCGGGCCCGGGAGGGATGAA	1.0	4.0	empirical	NCKAP1_+_183902936.23-P1P2	TAGGAGAGCGCGCCCATGGC	2.0	5.0	empirical	NCKAP1_+_183902661.23-P1P2|NCKAP1_+_183902936.23-P1P2
GTF2E2	P1P2	1-2	significant	GTF2E2_-_30515502.23-P1P2	GGCCCCTACCTGAGTGAGAA	1.0	1.0	empirical	GTF2E2_+_30515555.23-P1P2	ACGCCGGCACTGCACCCTCC	2.0	6.0	empirical	GTF2E2_-_30515502.23-P1P2|GTF2E2_+_30515555.23-P1P2
RHOQ	P1P2	1-2	nonessential	RHOQ_-_46769671.23-P1P2	GGCGGCCCTCGCAGGGAGTG	1.0	1.0	predicted	RHOQ_-_46769664.23-P1P2	TGCGAGGGCCGCGCGGAGGC	2.0	2.0	predicted	RHOQ_-_46769671.23-P1P2|RHOQ_-_46769664.23-P1P2
LURAP1	P1P2	1-2	nonessential	LURAP1_+_46669076.23-P1P2	GGCGGGCCCAAGCCTGAAAA	1.0	1.0	predicted	LURAP1_+_46669040.23-P1P2	CCGGGAGCCGGTCCCCGGCC	2.0	2.0	predicted	LURAP1_+_46669076.23-P1P2|LURAP1_+_46669040.23-P1P2
HIST2H2AA3	ENST00000369161.3	1-2	significant	HIST2H2AA3_+_149814282.23-ENST00000369161.3	GGCCAGGCAGGAGTTTCTCT	1.0	3.0	empirical	HIST2H2AA3_-_149814302.23-ENST00000369161.3	GGCAGGAGTTTCTCTCGGTC	2.0	5.0	empirical	HIST2H2AA3_+_149814282.23-ENST00000369161.3|HIST2H2AA3_-_149814302.23-ENST00000369161.3
EIF5	P1	1-2	significant	EIF5_-_103800558.23-P1	GGCCGAGGGTAGCTTGAGCG	1.0	3.0	empirical	EIF5_-_103800597.23-P1	CTGGAATGTTCTCGCTCTGC	2.0	1.0	empirical	EIF5_-_103800558.23-P1|EIF5_-_103800597.23-P1
AURKAIP1	P1P2	1-2	significant	AURKAIP1_+_1310516.23-P1P2	GTCGAGGTCGGGCTTGGGAA	1.0	2.0	empirical	AURKAIP1_-_1310395.23-P1P2	CGTTCTGGGACCTTTCGGTC	2.0	10.0	empirical	AURKAIP1_+_1310516.23-P1P2|AURKAIP1_-_1310395.23-P1P2
RPS14	P1P2	1-2	essential	RPS14_+_149829238.23-P1P2	GAGGCCCGGGCGCGACAATC	1.0	4.0	essential	RPS14_+_149829235.23-P1P2	CCCGATTGTCGCGCCCGGGC	2.0	2.0	essential	RPS14_+_149829238.23-P1P2|RPS14_+_149829235.23-P1P2
PKM	P1	1-2	significant	PKM_+_72523549.23-P1	GCCGCAGCGGGATAACCTTG	1.0	2.0	empirical	PKM_-_72523504.23-P1	GATCTCTTCGTCTTTGCAGC	2.0	6.0	empirical	PKM_+_72523549.23-P1|PKM_-_72523504.23-P1
TMX2	P1P2	1-2	significant	TMX2_+_57480105.23-P1P2	GAATACACGAGAGCAATTAG	1.0	3.0	empirical	TMX2_-_57480081.23-P1P2	TAACGGCCACTGCTCGCCGC	2.0	1.0	empirical	TMX2_+_57480105.23-P1P2|TMX2_-_57480081.23-P1P2
BPTF	P1P2	1-2	significant	BPTF_+_65821601.23-P1P2	GTGACTGGGGGAACCGACAG	1.0	6.0	empirical	BPTF_-_65821672.23-P1P2	CTCCGGATCGCCTTCAGCCC	2.0	1.0	empirical	BPTF_+_65821601.23-P1P2|BPTF_-_65821672.23-P1P2
PRPF6	P1P2	1-2	significant	PRPF6_-_62612504.23-P1P2	GCGACGGCGACACTTTGCTA	1.0	1.0	empirical	PRPF6_+_62612569.23-P1P2	TCCTAGCCTTGGTCGTCGCC	2.0	7.0	empirical	PRPF6_-_62612504.23-P1P2|PRPF6_+_62612569.23-P1P2
SEC63	P1P2	1-2	significant	SEC63_+_108278979.23-P1P2	GCGCGGCGTCCGGGATGACA	1.0	5.0	empirical	SEC63_-_108279195.23-P1P2	GTACGATGACAGTGGGAACC	2.0	2.0	empirical	SEC63_+_108278979.23-P1P2|SEC63_-_108279195.23-P1P2
RNF4	P1P2	1-2	significant	RNF4_-_2471345.23-P1P2	GGCTGTTAGGGGGAAGACCC	1.0	3.0	empirical	RNF4_-_2471349.23-P1P2	GCCCGGGTCTTCCCCCTAAC	2.0	1.0	empirical	RNF4_-_2471345.23-P1P2|RNF4_-_2471349.23-P1P2
TTK	P1P2	1-2	essential	TTK_+_80714409.23-P1P2	GCCTACAGAAAGCTGCGCTG	1.0	3.0	essential	TTK_-_80714487.23-P1P2	ACACCGGCTGCGGCTGTTCC	2.0	1.0	essential	TTK_+_80714409.23-P1P2|TTK_-_80714487.23-P1P2
DNAJA1	P1	1-2	significant	DNAJA1_-_33025322.23-P1	GGGAGGAGCGGTAACTACCC	1.0	1.0	empirical	DNAJA1_-_33025302.23-P1	CCTCTCACCGAGCGTTCTGC	2.0	3.0	empirical	DNAJA1_-_33025322.23-P1|DNAJA1_-_33025302.23-P1
TSR2	P1P2	1-2	essential	TSR2_-_54466860.23-P1P2	GGACTGGGGCCGGATAATGG	1.0	3.0	essential	TSR2_-_54467042.23-P1P2	ACTCCTCTTATGCCGCCTAC	2.0	1.0	essential	TSR2_-_54466860.23-P1P2|TSR2_-_54467042.23-P1P2
INCENP	P1P2	1-2	essential	INCENP_+_61891519.23-P1P2	GCCTTCGGGACTCACCGCAC	1.0	3.0	essential	INCENP_+_61891506.23-P1P2	GGTTGCTCCTCCCGTGCGGC	2.0	4.0	essential	INCENP_+_61891519.23-P1P2|INCENP_+_61891506.23-P1P2
PGS1	P1P2	1-2	significant	PGS1_-_76374755.23-P1P2	GCGGCGAGTCTCCATGGCGG	1.0	6.0	empirical	PGS1_+_76374776.23-P1P2	GTGTTCTGGAGGCGACTGCC	2.0	1.0	empirical	PGS1_-_76374755.23-P1P2|PGS1_+_76374776.23-P1P2
LCE1C	P1P2	1-2	nonessential	LCE1C_-_152779087.23-P1P2	GGAACACTTACCGGGGTCAC	1.0	1.0	predicted	LCE1C_-_152779080.23-P1P2	CGGTAAGTGTTCTTTGAGAC	2.0	2.0	predicted	LCE1C_-_152779087.23-P1P2|LCE1C_-_152779080.23-P1P2
AP2M1	P2	1-2	essential	AP2M1_+_183894722.23-P2	GACAGACCTAGGACAGGCGG	1.0	1.0	predicted	AP2M1_+_183894728.23-P2	GTCCTAGGTCTGTTCTCAGC	2.0	2.0	predicted	AP2M1_+_183894722.23-P2|AP2M1_+_183894728.23-P2
ANAPC10	P1P2	1-2	significant	ANAPC10_+_146019314.23-P1P2	GTGGCGAAGCCAGCTGCTGG	1.0	2.0	empirical	ANAPC10_+_146019317.23-P1P2	GCAGCTGGCTTCGCCAACGC	2.0	1.0	empirical	ANAPC10_+_146019314.23-P1P2|ANAPC10_+_146019317.23-P1P2
TKT	P1	1-2	significant	TKT_-_53289752.23-P1	GCGGGCCACCTTCCTCGTCT	1.0	10.0	empirical	TKT_+_53289954.23-P1	TGGTGCGGCAGGCGGGGACC	2.0	4.0	empirical	TKT_-_53289752.23-P1|TKT_+_53289954.23-P1
RAD51C	P1P2	1-2	significant	RAD51C_+_56769980.23-P1P2	GCAGGCTCACCTGCTAACCC	1.0	2.0	empirical	RAD51C_+_56770199.23-P1P2	CAGTCTTCGTTCTCTCGCCC	2.0	1.0	empirical	RAD51C_+_56769980.23-P1P2|RAD51C_+_56770199.23-P1P2
HIST1H2BM	P1P2	1-2	nonessential	HIST1H2BM_+_27782830.23-P1P2	GGGACTGGAGCAGATTTGAC	1.0	1.0	predicted	HIST1H2BM_+_27782850.23-P1P2	TAAAAAAGGCTCCAAGAAGC	2.0	2.0	predicted	HIST1H2BM_+_27782830.23-P1P2|HIST1H2BM_+_27782850.23-P1P2
FARS2	P1P2	1-2	significant	FARS2_+_5261818.23-P1P2	GCAGGCTCGTTCGCTCTCAC	1.0	2.0	empirical	FARS2_-_5261304.23-P1P2	CTTATTTCCCCGCCCTCCCC	2.0	8.0	empirical	FARS2_+_5261818.23-P1P2|FARS2_-_5261304.23-P1P2
DCAF6	P1P2	1-2	nonessential	DCAF6_+_167906008.23-P1P2	GGCGCAGCGTTAGATGGCGG	1.0	1.0	predicted	DCAF6_-_167905955.23-P1P2	CATACTCTCCTTCTTAGACC	2.0	2.0	predicted	DCAF6_+_167906008.23-P1P2|DCAF6_-_167905955.23-P1P2
EIF3D	P1P2	1-2	essential	EIF3D_+_36925166.23-P1P2	GCTGCTGCTAACGCGGTCCC	1.0	4.0	essential	EIF3D_-_36925159.23-P1P2	TCTGTTGCCATCCCGGCCGC	2.0	3.0	essential	EIF3D_+_36925166.23-P1P2|EIF3D_-_36925159.23-P1P2
SLC1A5	P2	1-2	significant	SLC1A5_+_47288025.23-P2	GGCTAGCACGCCAGCCTCTT	1.0	1.0	predicted	SLC1A5_-_47288033.23-P2	CTTGGGGCTGAAGGAGGCTC	2.0	2.0	predicted	SLC1A5_+_47288025.23-P2|SLC1A5_-_47288033.23-P2
CSTF3	P1P2	1-2	essential	CSTF3_+_33183038.23-P1P2	GCCTCCTCCTCGGCCGGCAG	1.0	4.0	essential	CSTF3_-_33182802.23-P1P2	CGTCTGTTCCTCCGACTGCC	2.0	5.0	essential	CSTF3_+_33183038.23-P1P2|CSTF3_-_33182802.23-P1P2
HIRA	P2	1-2	significant	HIRA_+_19419212.23-P2	GAGGAGCGGCGCAGGGGATG	1.0	1.0	empirical	HIRA_+_19419231.23-P2	CCTCAGGCGGCTCCCGGGCC	2.0	2.0	empirical	HIRA_+_19419212.23-P2|HIRA_+_19419231.23-P2
NCAPG	P1P2	1-2	significant	NCAPG_-_17812596.23-P1P2	GTCGAGCGGTAAATACTCCC	1.0	1.0	empirical	NCAPG_-_17812684.23-P1P2	GGACGAGTCCTGCCCGCGCC	2.0	6.0	empirical	NCAPG_-_17812596.23-P1P2|NCAPG_-_17812684.23-P1P2
FDXR	P1P2	1-2	significant	FDXR_+_72868908.23-P1P2	GAGGGGTCGGAGCAGAGCTG	1.0	2.0	empirical	FDXR_+_72869065.23-P1P2	TGGCTGGGAACAGCAACCTC	1.0	1.0	predicted	FDXR_+_72868908.23-P1P2|FDXR_+_72869065.23-P1P2
AP2M1	P1	1-2	essential	AP2M1_-_183892660.23-P1	GGGCACTGCGGTGAAAGCCG	1.0	3.0	essential	AP2M1_-_183892679.23-P1	GCTCGTCTGCCCGCTGCCTC	2.0	7.0	essential	AP2M1_-_183892660.23-P1|AP2M1_-_183892679.23-P1
DDX56	P1P2	1-2	essential	DDX56_+_44613471.23-P1P2	GTGGAGGACTCTGAAGCACT	1.0	2.0	essential	DDX56_-_44613091.23-P1P2	TGTACCCGTGCAGGCCGGCC	2.0	9.0	essential	DDX56_+_44613471.23-P1P2|DDX56_-_44613091.23-P1P2
LARS2	P1P2	1-2	significant	LARS2_-_45430128.23-P1P2	GGGCAGTGCTCGCCTAAAGG	1.0	3.0	empirical	LARS2_-_45430137.23-P1P2	CGTTCTCCACCTTTAGGCGC	2.0	5.0	empirical	LARS2_-_45430128.23-P1P2|LARS2_-_45430137.23-P1P2
MDN1	P1P2	1-2	essential	MDN1_+_90529477.23-P1P2	GCCGTGTGCTCACCCACGTG	1.0	10.0	essential	MDN1_-_90529439.23-P1P2	TTCCTGCGGGCGTAGTTGCC	2.0	4.0	essential	MDN1_+_90529477.23-P1P2|MDN1_-_90529439.23-P1P2
FBXO5	P1P2	1-2	significant	FBXO5_-_153304123.23-P1P2	GACGTGGAGTCTGCCTCAGG	1.0	1.0	empirical	FBXO5_-_153304140.23-P1P2	CCGGAGCGGTTCCTCCACCC	2.0	3.0	empirical	FBXO5_-_153304123.23-P1P2|FBXO5_-_153304140.23-P1P2
TTI2	P1P2	1-2	significant	TTI2_+_33370618.23-P1P2	GTCCGGATCCTGTTAGACAC	1.0	5.0	empirical	TTI2_-_33370638.23-P1P2	GATCCTGTTAGACACCGGCC	2.0	1.0	empirical	TTI2_+_33370618.23-P1P2|TTI2_-_33370638.23-P1P2
BRF1	P1P2	1-2	significant	BRF1_-_105767306.23-P1P2	GGGCTTCGGCGGAACCCGAG	1.0	7.0	empirical	BRF1_+_105767309.23-P1P2	ACCGGTGAGCGCAGCCGAGC	2.0	5.0	empirical	BRF1_-_105767306.23-P1P2|BRF1_+_105767309.23-P1P2
ACD	P1P2	1-2	significant	ACD_-_67694143.23-P1P2	GTCCCCACGGCTACACCCAG	1.0	1.0	empirical	ACD_+_67694124.23-P1P2	ACGGCTACACCCAGCGGATC	2.0	2.0	empirical	ACD_-_67694143.23-P1P2|ACD_+_67694124.23-P1P2
SNRNP25	P1P2	1-2	significant	SNRNP25_-_103898.23-P1P2	GGGGCAGAGCCCGGCTGAGA	1.0	1.0	empirical	SNRNP25_-_103870.23-P1P2	GCCCGCACTAGGGAGGCCAC	2.0	9.0	empirical	SNRNP25_-_103898.23-P1P2|SNRNP25_-_103870.23-P1P2
NOP14	P1P2	1-2	significant	NOP14_+_2965021.23-P1P2	GGCGAAGGCGAAGAAGGTCG	1.0	3.0	empirical	NOP14_+_2965104.23-P1P2	TAAGACACGTGCCGGGCCGC	2.0	4.0	empirical	NOP14_+_2965021.23-P1P2|NOP14_+_2965104.23-P1P2
FAF2	P1P2	1-2	significant	FAF2_-_175875400.23-P1P2	GCGGGTCAGGAGCGTAGAGG	1.0	3.0	empirical	FAF2_-_175875441.23-P1P2	GGGTTAGATCCCGCTCCTCC	2.0	1.0	empirical	FAF2_-_175875400.23-P1P2|FAF2_-_175875441.23-P1P2
GON4L	P2	1-2	significant	GON4L_+_155829080.23-P2	GACTGAAGGGTAAGAAGCAT	1.0	2.0	empirical	GON4L_+_155829093.23-P2	TTCAGTACTTTCTCGTTTTC	2.0	5.0	empirical	GON4L_+_155829080.23-P2|GON4L_+_155829093.23-P2
ISCA2	P1P2	1-2	significant	ISCA2_-_74960525.23-P1P2	GACGGCCGCGACGCAGAGAG	1.0	4.0	empirical	ISCA2_+_74960428.23-P1P2	GGGTGAGAAACGGGGGAGAC	2.0	1.0	empirical	ISCA2_-_74960525.23-P1P2|ISCA2_+_74960428.23-P1P2
RPN2	P1P2	1-2	significant	RPN2_-_35807757.23-P1P2	GTCCGGCGGGACCTGCTCGG	1.0	2.0	empirical	RPN2_-_35807762.23-P1P2	TTCCTCCGAGCAGGTCCCGC	2.0	1.0	empirical	RPN2_-_35807757.23-P1P2|RPN2_-_35807762.23-P1P2
SNRPD1	P1P2	1-2	essential	SNRPD1_+_19192365.23-P1P2	GAGCGGCGCCGTCACCCTCT	1.0	8.0	essential	SNRPD1_+_19192288.23-P1P2	CTGGAGTAGGCGCTTCCGGC	2.0	1.0	essential	SNRPD1_+_19192365.23-P1P2|SNRPD1_+_19192288.23-P1P2
KXD1	P1P2	1-2	significant	KXD1_-_18668945.23-P1P2	GGGATCTGGATCCGGATCAG	1.0	5.0	empirical	KXD1_-_18669142.23-P1P2	CGGTTCTATATCCAGGTTAC	2.0	5.0	empirical	KXD1_-_18668945.23-P1P2|KXD1_-_18669142.23-P1P2
GTF2E1	P1P2	1-2	essential	GTF2E1_+_120461646.23-P1P2	GGAACAAGGAACAGGGAACA	1.0	4.0	essential	GTF2E1_+_120461660.23-P1P2	TGTTCGGAGTTCCCTGGCCC	2.0	3.0	essential	GTF2E1_+_120461646.23-P1P2|GTF2E1_+_120461660.23-P1P2
HIST2H3A	P1P2	1-2	significant	HIST2H3A_+_149824198.23-P1P2	GCCATAGCGAACCAAAACAC	1.0	2.0	empirical	HIST2H3A_+_149824178.23-P1P2	GCCGCTGCGCTGGTAAGCCC	2.0	1.0	empirical	HIST2H3A_+_149824198.23-P1P2|HIST2H3A_+_149824178.23-P1P2
DNTTIP2	P1P2	1-2	essential	DNTTIP2_-_94344536.23-P1P2	GAAGCTCGGGTCCTCTCTGT	1.0	1.0	essential	DNTTIP2_+_94344679.23-P1P2	GTGCAGATCTGGTAACCACC	2.0	5.0	essential	DNTTIP2_-_94344536.23-P1P2|DNTTIP2_+_94344679.23-P1P2
MST1	ENST00000449682.2	1-2	nonessential	MST1_-_49726286.23-ENST00000449682.2	GAGGGCCTAGTACAGCTTAG	1.0	1.0	predicted	MST1_-_49726291.23-ENST00000449682.2	GTCCACTAAGCTGTACTAGC	2.0	2.0	predicted	MST1_-_49726286.23-ENST00000449682.2|MST1_-_49726291.23-ENST00000449682.2
LAS1L	P1P2	1-2	significant	LAS1L_+_64754550.23-P1P2	GGCCAGGTCTAGGTTCCCAG	1.0	4.0	empirical	LAS1L_+_64754657.23-P1P2	TCACTCCGAACCGCCACCGC	2.0	2.0	empirical	LAS1L_+_64754550.23-P1P2|LAS1L_+_64754657.23-P1P2
SDHD	P1P2	1-2	nonessential	SDHD_-_111957602.23-P1P2	GCGCCTAAGTGGTTCCGGGT	1.0	1.0	predicted	SDHD_+_111957583.23-P1P2	AAGTGGTTCCGGGTTGGTGC	2.0	2.0	predicted	SDHD_-_111957602.23-P1P2|SDHD_+_111957583.23-P1P2
RRS1	P1P2	1-2	essential	RRS1_+_67341292.23-P1P2	GACAGTGGCGGCCCAAACTC	1.0	3.0	essential	RRS1_+_67341681.23-P1P2	CGACCGCGGCCACTTACACC	2.0	5.0	essential	RRS1_+_67341292.23-P1P2|RRS1_+_67341681.23-P1P2
RPL23	P1P2	1-2	essential	RPL23_+_37009944.23-P1P2	GAAGATGTCGAAGCGAGGTG	1.0	4.0	essential	RPL23_-_37010011.23-P1P2	GTGTCCTTTGAATCGACTTC	2.0	1.0	essential	RPL23_+_37009944.23-P1P2|RPL23_-_37010011.23-P1P2
TEX10	P1P2	1-2	essential	TEX10_+_103115177.23-P1P2	GACGCGGCCGCGTGAGGACG	1.0	4.0	essential	TEX10_+_103115133.23-P1P2	CCGACCTCAGGCTCTAGCTC	2.0	5.0	essential	TEX10_+_103115177.23-P1P2|TEX10_+_103115133.23-P1P2
METTL3	P1P2	1-2	significant	METTL3_+_21979431.23-P1P2	GGTGAGAATTGGCTATATCC	1.0	2.0	empirical	METTL3_-_21979084.23-P1P2	CCTCACGCTGGGCCTCGGTC	2.0	7.0	empirical	METTL3_+_21979431.23-P1P2|METTL3_-_21979084.23-P1P2
ATP6V1F	P1P2	1-2	significant	ATP6V1F_-_128502898.23-P1P2	GAGGCCGACGGGGCGCCGTA	1.0	1.0	empirical	ATP6V1F_+_128503227.23-P1P2	TTCCGGAGCGGAGGCCTCCC	2.0	5.0	empirical	ATP6V1F_-_128502898.23-P1P2|ATP6V1F_+_128503227.23-P1P2
KIF18A	P1P2	1-2	significant	KIF18A_+_28129677.23-P1P2	GTTGAGTCTGAAGCGCTGGG	1.0	4.0	empirical	KIF18A_+_28129657.23-P1P2	CTTCACTTTAATGTCCGCCC	2.0	3.0	empirical	KIF18A_+_28129677.23-P1P2|KIF18A_+_28129657.23-P1P2
SPC25	P1P2	1-2	essential	SPC25_+_169746860.23-P1P2	GAGTGGGCGCGGATCTGGTG	1.0	1.0	essential	SPC25_+_169746886.23-P1P2	ACAGCCGGACTCTAGGCTCC	2.0	4.0	essential	SPC25_+_169746860.23-P1P2|SPC25_+_169746886.23-P1P2
CUL2	P1P2	1-2	significant	CUL2_+_35379233.23-P1P2	GATGGCAGCGCTGTGAGCAG	1.0	2.0	empirical	CUL2_+_35379513.23-P1P2	TCCGGTCTCCTTCTTCCGCC	2.0	6.0	empirical	CUL2_+_35379233.23-P1P2|CUL2_+_35379513.23-P1P2
HSPD1	P1P2	1-2	significant	HSPD1_+_198364183.23-P1P2	GGGGAGGGTGGTGTACGTGA	1.0	2.0	empirical	HSPD1_+_198364452.23-P1P2	ACTCGGGGGTCGCAGGAGCC	2.0	4.0	empirical	HSPD1_+_198364183.23-P1P2|HSPD1_+_198364452.23-P1P2
RPS2	P1P2	1-2	significant	RPS2_-_2014779.23-P1P2	GATTCCCGCCGCCCACGCAG	1.0	1.0	empirical	RPS2_-_2014704.23-P1P2	TTGTCTGGGTCTCGCGGGGC	2.0	4.0	empirical	RPS2_-_2014779.23-P1P2|RPS2_-_2014704.23-P1P2
EMC4	P1P2	1-2	significant	EMC4_-_34517276.23-P1P2	GCCTGTTGTGGAGTACGCTT	1.0	2.0	empirical	EMC4_-_34517254.23-P1P2	ACCAGCGTTCTCCGCTTTGC	2.0	1.0	empirical	EMC4_-_34517276.23-P1P2|EMC4_-_34517254.23-P1P2
POLR2H	P1P2	1-2	essential	POLR2H_+_184081227.23-P1P2	GTGAGAGCGCGACCACAGTT	1.0	1.0	essential	POLR2H_-_184081237.23-P1P2	CAGTTGGGAGTACGTGCACC	2.0	2.0	essential	POLR2H_+_184081227.23-P1P2|POLR2H_-_184081237.23-P1P2
SRSF1	P1P2	1-2	essential	SRSF1_-_56084574.23-P1P2	GCGGCAGAGCGAGCCCGCAG	1.0	3.0	essential	SRSF1_-_56084638.23-P1P2	CCATATCCGTGCGCCGAGCC	2.0	1.0	essential	SRSF1_-_56084574.23-P1P2|SRSF1_-_56084638.23-P1P2
FRG2	ENST00000378763.1,ENST00000504750.1	1-2	nonessential	FRG2_-_190948162.23-ENST00000378763.1,ENST00000504750.1	GCCCTCCTTCCAGACTCCAC	1.0	1.0	predicted	FRG2_-_190948402.23-ENST00000378763.1,ENST00000504750.1	TTGGACGTGAGAGAGAGCGC	2.0	2.0	predicted	FRG2_-_190948162.23-ENST00000378763.1,ENST00000504750.1|FRG2_-_190948402.23-ENST00000378763.1,ENST00000504750.1
VPS28	P1P2	1-2	significant	VPS28_-_145653878.23-P1P2	GCGGGCCCCGGGTACCTGGA	1.0	3.0	empirical	VPS28_-_145653897.23-P1P2	TCTTCCCGACCGCGAGCCGC	2.0	1.0	empirical	VPS28_-_145653878.23-P1P2|VPS28_-_145653897.23-P1P2
MAD2L1	P1P2	1-2	significant	MAD2L1_+_120987540.23-P1P2	GGGACACGGTGTGACTGGGG	1.0	10.0	empirical	MAD2L1_+_120987919.23-P1P2	CTCCGCGGACAGCAACCACC	2.0	1.0	empirical	MAD2L1_+_120987540.23-P1P2|MAD2L1_+_120987919.23-P1P2
NAE1	P1P2	1-2	significant	NAE1_+_66864833.23-P1P2	GTGGTGGCGGCGCTCCGCAG	1.0	1.0	empirical	NAE1_+_66864757.23-P1P2	GTCGTACTTCTGCTCCTTGC	2.0	2.0	empirical	NAE1_+_66864833.23-P1P2|NAE1_+_66864757.23-P1P2
NUDC	P1P2	1-2	essential	NUDC_-_27248261.23-P1P2	GGCGGACGACTAGAGTCGTT	1.0	2.0	essential	NUDC_-_27248296.23-P1P2	GCGCTCTCTACGCTCCTGCC	2.0	3.0	essential	NUDC_-_27248261.23-P1P2|NUDC_-_27248296.23-P1P2
PLK1	P1P2	1-2	essential	PLK1_+_23690651.23-P1P2	GAGCGACACTCACCCTCCGG	1.0	4.0	essential	PLK1_-_23690679.23-P1P2	CAGCAGCGACACTCACCCTC	2.0	4.0	essential	PLK1_+_23690651.23-P1P2|PLK1_-_23690679.23-P1P2
SLC25A26	ENST00000354883.6	1-2	nonessential	SLC25A26_-_66119330.23-ENST00000354883.6	GGTCTTCATCTATCAGCCCA	1.0	1.0	predicted	SLC25A26_-_66119533.23-ENST00000354883.6	GTGTTAATGGCTGGGCAACC	2.0	2.0	predicted	SLC25A26_-_66119330.23-ENST00000354883.6|SLC25A26_-_66119533.23-ENST00000354883.6
SPTLC1	P1P2	1-2	significant	SPTLC1_+_94877225.23-P1P2	GTTCGTCTGGGAAGGTCCTA	1.0	5.0	empirical	SPTLC1_-_94877454.23-P1P2	GGAGCTTCTAGTCCCAGCGC	2.0	1.0	empirical	SPTLC1_+_94877225.23-P1P2|SPTLC1_-_94877454.23-P1P2
NACA	P1P2	1-2	significant	NACA_-_57119029.23-P1P2	GGGCTGCGGATAGACAGTAG	1.0	1.0	empirical	NACA_+_57118865.23-P1P2	TGCTTTTGCCAGGACACCAC	2.0	8.0	empirical	NACA_-_57119029.23-P1P2|NACA_+_57118865.23-P1P2
HSPA9	P1P2	1-2	essential	HSPA9_-_137911079.23-P1P2	GGAGCTGCGCGATGCGGTGG	1.0	3.0	essential	HSPA9_-_137911031.23-P1P2	CGTACTCCTCCATTTATCCC	2.0	1.0	essential	HSPA9_-_137911079.23-P1P2|HSPA9_-_137911031.23-P1P2
HAPLN2	P1P2	1-2	nonessential	HAPLN2_+_156589260.23-P1P2	GTTTCAGGTGGGAACTATCC	1.0	1.0	predicted	HAPLN2_-_156589396.23-P1P2	CCCTTTCCATATGCGCCTCC	2.0	2.0	predicted	HAPLN2_+_156589260.23-P1P2|HAPLN2_-_156589396.23-P1P2
CD3EAP	P1P2	1-2	essential	CD3EAP_-_45909922.23-P1P2	GAACCTGGTGCGAGCAGCCC	1.0	1.0	essential	CD3EAP_+_45909934.23-P1P2	GAGGTGTGGGTCCCAGGATC	2.0	2.0	essential	CD3EAP_-_45909922.23-P1P2|CD3EAP_+_45909934.23-P1P2
GAR1	P1P2	1-2	significant	GAR1_-_110736887.23-P1P2	GGGCGGTACGGTAACCGAGG	1.0	3.0	empirical	GAR1_-_110736884.23-P1P2	CGGTTACCGTACCGCCACAC	2.0	1.0	empirical	GAR1_-_110736887.23-P1P2|GAR1_-_110736884.23-P1P2
BCS1L	P1P2	1-2	significant	BCS1L_-_219524504.23-P1P2	GCGGGTTACCCCAAACCATG	1.0	1.0	empirical	BCS1L_-_219524485.23-P1P2	TCACTCAGCCCTCTCACCGC	2.0	4.0	empirical	BCS1L_-_219524504.23-P1P2|BCS1L_-_219524485.23-P1P2
BUD13	P1P2	1-2	essential	BUD13_-_116643492.23-P1P2	GCCGAGGGCGGAGTTGGGAA	1.0	4.0	essential	BUD13_+_116643652.23-P1P2	TGGAAAGCGGCGGAGCTGCC	2.0	3.0	essential	BUD13_-_116643492.23-P1P2|BUD13_+_116643652.23-P1P2
SLC25A10	P1P2	1-2	significant	SLC25A10_+_79670502.23-P1P2	GCGGGCTGGAAGGTCACACG	1.0	6.0	empirical	SLC25A10_+_79670494.23-P1P2	GGGAACCGCGTGTGACCTTC	2.0	1.0	empirical	SLC25A10_+_79670502.23-P1P2|SLC25A10_+_79670494.23-P1P2
KRTAP4-2	P1P2	1-2	nonessential	KRTAP4-2_-_39334474.23-P1P2	GAAGGTGGGTTTGGAAGGTT	1.0	1.0	predicted	KRTAP4-2_-_39334001.23-P1P2	CACCTATACTCACCTGCCTC	2.0	2.0	predicted	KRTAP4-2_-_39334474.23-P1P2|KRTAP4-2_-_39334001.23-P1P2
NOP16	P1P2	1-2	essential	NOP16_+_175815576.23-P1P2	GCACGAGGTCTGAGAGACAG	1.0	1.0	essential	NOP16_+_175815510.23-P1P2	CCGGGTTTTGCCCTTGGCCC	2.0	2.0	essential	NOP16_+_175815576.23-P1P2|NOP16_+_175815510.23-P1P2
GLMN	P1P2	1-2	significant	GLMN_+_92764515.23-P1P2	GCGGGCTAAGACGCCGGAGG	1.0	5.0	empirical	GLMN_-_92764279.23-P1P2	TGAGGACCGGGCTGACTCGC	2.0	8.0	empirical	GLMN_+_92764515.23-P1P2|GLMN_-_92764279.23-P1P2
SNRPD2	P1P2	1-2	significant	SNRPD2_+_46195119.23-P1P2	GAGGCCGGGCTAGGCTTAGG	1.0	8.0	empirical	SNRPD2_+_46195138.23-P1P2	CACATGATGGTCACTACGCC	2.0	2.0	empirical	SNRPD2_+_46195119.23-P1P2|SNRPD2_+_46195138.23-P1P2
ABCB7	P1P2	1-2	significant	ABCB7_-_74376019.23-P1P2	GAGCCGCTAACAGAGACTAA	1.0	1.0	empirical	ABCB7_+_74375885.23-P1P2	TACAGGTCCCCTTGCCCTTC	2.0	5.0	empirical	ABCB7_-_74376019.23-P1P2|ABCB7_+_74375885.23-P1P2
EIF2B3	P1P2	1-2	essential	EIF2B3_+_45452243.23-P1P2	GAGGCGGCGTGGAGATCGCT	1.0	2.0	essential	EIF2B3_+_45452232.23-P1P2	CAACCGCTCCCAGCGATCTC	2.0	1.0	essential	EIF2B3_+_45452243.23-P1P2|EIF2B3_+_45452232.23-P1P2
YPEL5	P1P2	1-2	significant	YPEL5_-_30369859.23-P1P2	GCTAAACCTGGAGACTCGGG	1.0	1.0	empirical	YPEL5_-_30369815.23-P1P2	CTCCCTGGTTGGGCCTCAAC	2.0	5.0	empirical	YPEL5_-_30369859.23-P1P2|YPEL5_-_30369815.23-P1P2
TNPO3	P1P2	1-2	significant	TNPO3_+_128694901.23-P1P2	GGGCCGTGGCCCAGACAGTG	1.0	4.0	empirical	TNPO3_+_128694944.23-P1P2	CCTCTTTGGCCGTTACCAGC	2.0	6.0	empirical	TNPO3_+_128694901.23-P1P2|TNPO3_+_128694944.23-P1P2
SIN3A	P1	1-2	significant	SIN3A_-_75743971.23-P1	GGAAACTCCGAGGGGGGAAG	1.0	8.0	empirical	SIN3A_-_75743934.23-P1	TCCTTCCCAGTCTGGGCACC	2.0	6.0	empirical	SIN3A_-_75743971.23-P1|SIN3A_-_75743934.23-P1
GGPS1	P1P2	1-2	significant	GGPS1_+_235491914.23-P1P2	GCCAGCGACACCGCATTAGT	1.0	5.0	empirical	GGPS1_-_235491895.23-P1P2	GGTCACACTGCGCAGGCGTC	2.0	4.0	empirical	GGPS1_+_235491914.23-P1P2|GGPS1_-_235491895.23-P1P2
VARS2	P1P2	1-2	essential	VARS2_-_30882058.23-P1P2	GAGGGCCACGTTCCAGGGTC	1.0	8.0	essential	VARS2_+_30882095.23-P1P2	TGGGATAGCGGCGGGGCCTC	2.0	3.0	essential	VARS2_-_30882058.23-P1P2|VARS2_+_30882095.23-P1P2
MRPS25	P1P2	1-2	essential	MRPS25_-_15106759.23-P1P2	GAGCCGAGCAGCGACGAGAA	1.0	2.0	essential	MRPS25_+_15106771.23-P1P2	GCGCGGATCTCACGCGGCTC	2.0	5.0	essential	MRPS25_-_15106759.23-P1P2|MRPS25_+_15106771.23-P1P2
ESPL1	P1P2	1-2	essential	ESPL1_-_53662296.23-P1P2	GGACTGCCCCGGGCCGCTGA	1.0	2.0	essential	ESPL1_-_53662083.23-P1P2	TCGTTTTCCGCGCCAGACCC	2.0	5.0	essential	ESPL1_-_53662296.23-P1P2|ESPL1_-_53662083.23-P1P2
SLC7A5	P1P2	1-2	significant	SLC7A5_+_87903056.23-P1P2	GTCGCTGGGCCGCGGCTCCC	1.0	10.0	empirical	SLC7A5_+_87902916.23-P1P2	GCGCCGAGCCGTCCGCGCTC	2.0	1.0	empirical	SLC7A5_+_87903056.23-P1P2|SLC7A5_+_87902916.23-P1P2
ZNF676	ENST00000397121.2	1-2	nonessential	ZNF676_-_22379471.23-ENST00000397121.2	GATTCTGCTGTGTAGAATCC	1.0	1.0	predicted	ZNF676_+_22379558.23-ENST00000397121.2	ATTGGTCATGGGCAGAACTC	2.0	2.0	predicted	ZNF676_-_22379471.23-ENST00000397121.2|ZNF676_+_22379558.23-ENST00000397121.2
LCE1E	P1P2	1-2	nonessential	LCE1E_+_152758771.23-P1P2	GGGACACATACCAAAGTCAC	1.0	1.0	predicted	LCE1E_+_152758791.23-P1P2	CTGGGAACAGAAGCAGGGGC	2.0	2.0	predicted	LCE1E_+_152758771.23-P1P2|LCE1E_+_152758791.23-P1P2
GPKOW	P1P2	1-2	significant	GPKOW_-_48980022.23-P1P2	GGTGAAGCCGAATGAAATTG	1.0	2.0	empirical	GPKOW_-_48979874.23-P1P2	TTGGAAATCTCTGCGGTGGC	2.0	1.0	empirical	GPKOW_-_48980022.23-P1P2|GPKOW_-_48979874.23-P1P2
NSA2	P1P2	1-2	significant	NSA2_-_74063329.23-P1P2	GAAAGGATGGTAGACCCGTG	1.0	3.0	empirical	NSA2_-_74063188.23-P1P2	TGGTGACGGCCGCAGAGCCC	2.0	7.0	empirical	NSA2_-_74063329.23-P1P2|NSA2_-_74063188.23-P1P2
MED27	P1P2	1-2	significant	MED27_+_134955254.23-P1P2	GTTGCTTGCGAAGCCGGCTT	1.0	4.0	empirical	MED27_-_134955263.23-P1P2	GCTTTGGAGAGCTGCTGTGC	2.0	1.0	empirical	MED27_+_134955254.23-P1P2|MED27_-_134955263.23-P1P2
HIST1H2BL	P1P2	1-2	nonessential	HIST1H2BL_-_27775680.23-P1P2	GGAGCAGACTTGGCCAGCTC	1.0	1.0	predicted	HIST1H2BL_-_27775105.23-P1P2	TAGAGGGTCCGACCTTTGCC	2.0	2.0	predicted	HIST1H2BL_-_27775680.23-P1P2|HIST1H2BL_-_27775105.23-P1P2
RPL7L1	P1P2	1-2	significant	RPL7L1_-_42847700.23-P1P2	GCGGAGCAAGAGTGAGTGTT	1.0	1.0	empirical	RPL7L1_-_42847842.23-P1P2	CAGCGCTACTCCTCCTCACC	2.0	9.0	empirical	RPL7L1_-_42847700.23-P1P2|RPL7L1_-_42847842.23-P1P2
CPSF6	P1P2	1-2	significant	CPSF6_+_69633592.23-P1P2	GCGCGGCCCAGAGGCGGCAA	1.0	1.0	empirical	CPSF6_+_69633482.23-P1P2	GGTACGTGAGAGCCCAGGTC	2.0	2.0	empirical	CPSF6_+_69633592.23-P1P2|CPSF6_+_69633482.23-P1P2
UTP18	P1P2	1-2	significant	UTP18_-_49338383.23-P1P2	GGAGCCTGGGCGACCTGCGG	1.0	4.0	empirical	UTP18_-_49337959.23-P1P2	CTCCGGCGGCATCGTTAGGC	2.0	1.0	empirical	UTP18_-_49338383.23-P1P2|UTP18_-_49337959.23-P1P2
UBE2N	P1P2	1-2	significant	UBE2N_+_93835696.23-P1P2	GTGCGTGAGGCGAGAGGAGC	1.0	1.0	empirical	UBE2N_+_93835347.23-P1P2	CACCCTCCGCCGGGGCGTGC	2.0	4.0	empirical	UBE2N_+_93835696.23-P1P2|UBE2N_+_93835347.23-P1P2
CCT6A	P1P2	1-2	essential	CCT6A_-_56119502.23-P1P2	GGCCACGCCGCGCCGGCTCT	1.0	4.0	essential	CCT6A_+_56119524.23-P1P2	CCGCTGGAGCAGCTATGGCC	2.0	3.0	essential	CCT6A_-_56119502.23-P1P2|CCT6A_+_56119524.23-P1P2
LIMS1	P1P2	1-2	significant	LIMS1_-_109150960.23-P1P2	GGCGGCGAGGGACTAGGACG	1.0	2.0	empirical	LIMS1_-_109150969.23-P1P2	CTCCAGCCGCGTCCTAGTCC	2.0	3.0	empirical	LIMS1_-_109150960.23-P1P2|LIMS1_-_109150969.23-P1P2
PES1	P1P2	1-2	essential	PES1_-_30987859.23-P1P2	GCGACTAGGGCCGCGCGTAC	1.0	1.0	essential	PES1_-_30987845.23-P1P2	AGTCGGCTCCTCAACGTGGC	2.0	3.0	essential	PES1_-_30987859.23-P1P2|PES1_-_30987845.23-P1P2
CASP8AP2	P1P2	1-2	essential	CASP8AP2_-_90539614.23-P1P2	GATGCCAGGGAGACCTCGGT	1.0	3.0	essential	CASP8AP2_-_90539622.23-P1P2	TTCTGCCCACCGAGGTCTCC	2.0	4.0	essential	CASP8AP2_-_90539614.23-P1P2|CASP8AP2_-_90539622.23-P1P2
CEP152	P1P2	1-2	significant	CEP152_+_49103224.23-P1P2	GGGACTAGAGCCAGGGTAAG	1.0	5.0	empirical	CEP152_+_49103178.23-P1P2	CGAGGAAACTCTAGTCCTGC	2.0	1.0	empirical	CEP152_+_49103224.23-P1P2|CEP152_+_49103178.23-P1P2
NELFB	P1P2	1-2	significant	NELFB_+_140150090.23-P1P2	GGCGGCCCGGCCCTCCAACT	1.0	8.0	empirical	NELFB_-_140149841.23-P1P2	CGGCGCCCTCCAGCTCGGCC	2.0	3.0	empirical	NELFB_+_140150090.23-P1P2|NELFB_-_140149841.23-P1P2
MYC	P1P2	1-2	significant	MYC_-_128748308.23-P1P2	GTATAATGCGAGGGTCTGGA	1.0	9.0	empirical	MYC_-_128748589.23-P1P2	GATCTCCCTTCCCAGGACGC	2.0	6.0	empirical	MYC_-_128748308.23-P1P2|MYC_-_128748589.23-P1P2
HIST1H2AB	P1P2	1-2	significant	HIST1H2AB_+_26033417.23-P1P2	GAAAACTGAGAGCCATCATA	1.0	10.0	empirical	HIST1H2AB_+_26033710.23-P1P2	ACAGGAAACTGCAAACCTGC	2.0	7.0	empirical	HIST1H2AB_+_26033417.23-P1P2|HIST1H2AB_+_26033710.23-P1P2
RPL27	P1P2	1-2	essential	RPL27_-_41150504.23-P1P2	GTGCCGGTAAGTAGAAGCTT	1.0	1.0	essential	RPL27_+_41150471.23-P1P2	GGTGGTTGCTGCCGGTAAGC	2.0	4.0	essential	RPL27_-_41150504.23-P1P2|RPL27_+_41150471.23-P1P2
MCM3AP	P1P2	1-2	significant	MCM3AP_+_47706142.23-P1P2	GTGCGCAGCGCTGAGTGTCG	1.0	1.0	empirical	MCM3AP_-_47706135.23-P1P2	GTGCTTGCGCCTCAAGTCTC	2.0	2.0	empirical	MCM3AP_+_47706142.23-P1P2|MCM3AP_-_47706135.23-P1P2
NFRKB	P1P2	1-2	significant	NFRKB_+_129765383.23-P1P2	GGCGCCCGCGGTTCAGGTGA	1.0	5.0	empirical	NFRKB_+_129765408.23-P1P2	CCTAACCCGCAGCCCTTCTC	2.0	3.0	empirical	NFRKB_+_129765383.23-P1P2|NFRKB_+_129765408.23-P1P2
NUP153	P1P2	1-2	significant	NUP153_+_17707004.23-P1P2	GTCGCCAGCGGCTTCAACTG	1.0	7.0	empirical	NUP153_+_17707041.23-P1P2	CTGTGCGCACAGCGCCCGCC	2.0	4.0	empirical	NUP153_+_17707004.23-P1P2|NUP153_+_17707041.23-P1P2
ACTR1A	P1P2	1-2	nonessential	ACTR1A_+_104262452.23-P1P2	GTGCGTGTCAGTGGCGCTAG	1.0	1.0	predicted	ACTR1A_+_104262449.23-P1P2	CCGCTAGCGCCACTGACACC	2.0	2.0	predicted	ACTR1A_+_104262452.23-P1P2|ACTR1A_+_104262449.23-P1P2
SLC1A5	P1	1-2	significant	SLC1A5_+_47291839.23-P1	GAAACGGGCTCAGAGCCACG	1.0	9.0	empirical	SLC1A5_+_47291829.23-P1	GGGCGTGCCGCGTGGCTCTC	2.0	5.0	empirical	SLC1A5_+_47291839.23-P1|SLC1A5_+_47291829.23-P1
SRSF10	P1P2	1-2	significant	SRSF10_-_24306779.23-P1P2	GCTCGGCCGGGCGCACTAAC	1.0	1.0	empirical	SRSF10_-_24306749.23-P1P2	CCATGTCCCGCTACCTGCGC	2.0	3.0	empirical	SRSF10_-_24306779.23-P1P2|SRSF10_-_24306749.23-P1P2
CCAR1	P1P2	1-2	significant	CCAR1_-_70481039.23-P1P2	GGTTAGCCGGGACCCGACTC	1.0	1.0	empirical	CCAR1_-_70481045.23-P1P2	TCACCTGAGTCGGGTCCCGC	2.0	3.0	empirical	CCAR1_-_70481039.23-P1P2|CCAR1_-_70481045.23-P1P2
SAMM50	P1P2	1-2	essential	SAMM50_+_44351418.23-P1P2	GCTGCCTCGCAGAGCTGCCC	1.0	3.0	essential	SAMM50_-_44351462.23-P1P2	CATGGTTCCCTCTCCAGCCC	2.0	1.0	essential	SAMM50_+_44351418.23-P1P2|SAMM50_-_44351462.23-P1P2
TUBGCP5	P1P2	1-2	essential	TUBGCP5_-_22833553.23-P1P2	GGCACGGGCCACCGTGGAGT	1.0	9.0	essential	TUBGCP5_+_22833539.23-P1P2	CCGTGGAGTCGGTTGGACGC	2.0	6.0	essential	TUBGCP5_-_22833553.23-P1P2|TUBGCP5_+_22833539.23-P1P2
PIK3R4	P1P2	1-2	significant	PIK3R4_-_130465552.23-P1P2	GTCCTCGAGGGCCTCACCAC	1.0	9.0	empirical	PIK3R4_-_130465652.23-P1P2	GGGAGTTCGGCGTTTGCTGC	2.0	1.0	empirical	PIK3R4_-_130465552.23-P1P2|PIK3R4_-_130465652.23-P1P2
ARPC2	P2	1-2	significant	ARPC2_+_219103598.23-P2	GTGGTGTAGCAGCCATATCC	1.0	1.0	predicted	ARPC2_-_219103608.23-P2	TATCCAGGCTTCAGGACCAC	2.0	2.0	predicted	ARPC2_+_219103598.23-P2|ARPC2_-_219103608.23-P2
NXF1	P2	1-2	significant	NXF1_-_62566496.23-P2	GGGGATGGCACAGGATGTTG	1.0	1.0	predicted	NXF1_+_62566715.23-P2	TGACACAGCCCTTTCTTTCC	2.0	2.0	predicted	NXF1_-_62566496.23-P2|NXF1_+_62566715.23-P2
MRPL20	P1P2	1-2	significant	MRPL20_+_1342447.23-P1P2	GTATCCCGCGGGCCAAGGGG	1.0	2.0	empirical	MRPL20_-_1342598.23-P1P2	TGGTCTTCCTCACCGCGCAC	2.0	3.0	empirical	MRPL20_+_1342447.23-P1P2|MRPL20_-_1342598.23-P1P2
MMGT1	P1P2	1-2	nonessential	MMGT1_-_135056233.23-P1P2	GCTGCGTAGAGAACGTGTGG	1.0	1.0	predicted	MMGT1_-_135056168.23-P1P2	CCATTTGCCGGCGCCCTTCC	2.0	2.0	predicted	MMGT1_-_135056233.23-P1P2|MMGT1_-_135056168.23-P1P2
NHP2	P1P2	1-2	significant	NHP2_-_177580863.23-P1P2	GCCAGGGAGGCGAGCCCACG	1.0	2.0	empirical	NHP2_+_177580913.23-P1P2	TACAACACGGCCAATCAGGC	2.0	8.0	empirical	NHP2_-_177580863.23-P1P2|NHP2_+_177580913.23-P1P2
DBR1	P1P2	1-2	essential	DBR1_+_137893744.23-P1P2	GTTTGCAGGAGTCTACACCC	1.0	6.0	essential	DBR1_+_137893673.23-P1P2	TACACCACAGCCAGCCCAGC	2.0	4.0	essential	DBR1_+_137893744.23-P1P2|DBR1_+_137893673.23-P1P2
SENP6	P1P2	1-2	significant	SENP6_+_76311650.23-P1P2	GTGTCCATGTGGACAGGGGT	1.0	1.0	empirical	SENP6_+_76311992.23-P1P2	CCGGAGAGGCCTGAGAAGCC	2.0	3.0	empirical	SENP6_+_76311650.23-P1P2|SENP6_+_76311992.23-P1P2
SRPRB	P1P2	1-2	essential	SRPRB_+_133524699.23-P1P2	GGCCACCCGGCGCGAGTCCG	1.0	3.0	essential	SRPRB_+_133524690.23-P1P2	TGGCTTCCGCGGACTCGCGC	2.0	5.0	essential	SRPRB_+_133524699.23-P1P2|SRPRB_+_133524690.23-P1P2
RNF14	P1P2	1-2	significant	RNF14_-_141349121.23-P1P2	GGGCGAGCTGAACCCAGACT	1.0	5.0	empirical	RNF14_-_141348739.23-P1P2	CTCACCGCCGCCAGCCGACC	2.0	1.0	empirical	RNF14_-_141349121.23-P1P2|RNF14_-_141348739.23-P1P2
MYCBP	P1P2	1-2	nonessential	MYCBP_-_39338779.23-P1P2	GCGGCCTGAAGAGACACCGG	1.0	1.0	predicted	MYCBP_+_39338845.23-P1P2	CACTACCTCGGGGCCCTCCC	2.0	2.0	predicted	MYCBP_-_39338779.23-P1P2|MYCBP_+_39338845.23-P1P2
RPAP1	P1P2	1-2	essential	RPAP1_+_41836411.23-P1P2	GAGACAGGCCTGGAGCACGT	1.0	2.0	essential	RPAP1_+_41836408.23-P1P2	CCTACGTGCTCCAGGCCTGC	2.0	3.0	essential	RPAP1_+_41836411.23-P1P2|RPAP1_+_41836408.23-P1P2
UBAP1	P1P2	1-2	significant	UBAP1_-_34179122.23-P1P2	GCCGGAGCGGGCAGAGTTGG	1.0	1.0	empirical	UBAP1_+_34179139.23-P1P2	TAGGGGCTGTCGGGAGCTCC	2.0	2.0	empirical	UBAP1_-_34179122.23-P1P2|UBAP1_+_34179139.23-P1P2
GINS2	P1P2	1-2	significant	GINS2_+_85722546.23-P1P2	GTCTCCTCCGGGACGCTGAG	1.0	2.0	empirical	GINS2_-_85722508.23-P1P2	CCATGGACGCTGCCGAGGTC	2.0	1.0	empirical	GINS2_+_85722546.23-P1P2|GINS2_-_85722508.23-P1P2
RPS19BP1	P1P2	1-2	significant	RPS19BP1_-_39928789.23-P1P2	GCCTCACACTACTTCCGACC	1.0	1.0	empirical	RPS19BP1_-_39928369.23-P1P2	CCGGTGCTGGGACCTGCGCC	2.0	10.0	empirical	RPS19BP1_-_39928789.23-P1P2|RPS19BP1_-_39928369.23-P1P2
SPATA5L1	P1P2	1-2	significant	SPATA5L1_+_45694589.23-P1P2	GAGGCAGACGAAACCAGATT	1.0	5.0	empirical	SPATA5L1_+_45694633.23-P1P2	GACTCGGATCCCTTCCCTGC	2.0	1.0	empirical	SPATA5L1_+_45694589.23-P1P2|SPATA5L1_+_45694633.23-P1P2
TEAD3	P1P2	1-2	nonessential	TEAD3_-_35464797.23-P1P2	GGGAATGTGCGGAATGAGCC	1.0	1.0	predicted	TEAD3_-_35464741.23-P1P2	CCCTTGCGGCTCCCTCGGGC	2.0	2.0	predicted	TEAD3_-_35464797.23-P1P2|TEAD3_-_35464741.23-P1P2
EIF3A	P1P2	1-2	essential	EIF3A_+_120840264.23-P1P2	GGGCGCGTGGGACCTTACGC	1.0	2.0	essential	EIF3A_-_120840274.23-P1P2	TACGCTGGTTCCCCTTCGTC	2.0	1.0	essential	EIF3A_+_120840264.23-P1P2|EIF3A_-_120840274.23-P1P2
C3orf17	P1P2	1-2	essential	C3orf17_-_112738463.23-P1P2	GGGATTCTCACACGGTTCCA	1.0	3.0	essential	C3orf17_+_112738436.23-P1P2	TAGGGATTCTCACACGGTTC	2.0	7.0	essential	C3orf17_-_112738463.23-P1P2|C3orf17_+_112738436.23-P1P2
CTU2	P1P2	1-2	significant	CTU2_-_88772951.23-P1P2	GGCGTGCCCATGTGTCAGGT	1.0	1.0	empirical	CTU2_+_88772905.23-P1P2	CCACAGTCTGCGACGGGACC	2.0	3.0	empirical	CTU2_-_88772951.23-P1P2|CTU2_+_88772905.23-P1P2
GMPPB	P1P2	1-2	significant	GMPPB_-_49761366.23-P1P2	GGAACGCGACACCGGGTAGA	1.0	3.0	empirical	GMPPB_+_49761355.23-P1P2	GGTAGACGGCTGCTGGCCCC	2.0	2.0	empirical	GMPPB_-_49761366.23-P1P2|GMPPB_+_49761355.23-P1P2
MSTO1	P1P2	1-2	nonessential	MSTO1_+_155582425.23-P1P2	GCAGAGCCAGTAACAGACAG	1.0	1.0	predicted	MSTO1_-_155582441.23-P1P2	GTAACAGACAGCGGCTGACC	2.0	2.0	predicted	MSTO1_+_155582425.23-P1P2|MSTO1_-_155582441.23-P1P2
RBM10	P1P2	1-2	significant	RBM10_+_47004643.23-P1P2	GGCGACGACGAGAAGGGAGT	1.0	7.0	empirical	RBM10_-_47004526.23-P1P2	ACACCCCTTGCGAACGCTCC	2.0	1.0	empirical	RBM10_+_47004643.23-P1P2|RBM10_-_47004526.23-P1P2
COPB2	P1P2	1-2	essential	COPB2_-_139108414.23-P1P2	GGCTGCGTCGGTCCAATCCC	1.0	6.0	essential	COPB2_+_139108459.23-P1P2	ATCCACTGACCGTCAGACTC	2.0	3.0	essential	COPB2_-_139108414.23-P1P2|COPB2_+_139108459.23-P1P2
XPO1	P1P2	1-2	significant	XPO1_+_61765301.23-P1P2	GACAGTAGCTACAGCCCCGG	1.0	3.0	empirical	XPO1_+_61765384.23-P1P2	CCTCCTAGTGCCTCAAACTC	2.0	5.0	empirical	XPO1_+_61765301.23-P1P2|XPO1_+_61765384.23-P1P2
CBLL1	P1P2	1-2	significant	CBLL1_-_107384626.23-P1P2	GATCATGGATCACACTGGTA	1.0	5.0	empirical	CBLL1_-_107384632.23-P1P2	CCTCCTTACCAGTGTGATCC	2.0	2.0	empirical	CBLL1_-_107384626.23-P1P2|CBLL1_-_107384632.23-P1P2
UTP15	P1P2	1-2	essential	UTP15_-_72861621.23-P1P2	GTGTGTCGCCGGCTCCTTGA	1.0	1.0	essential	UTP15_-_72861666.23-P1P2	ACCCTGCACAGTTCAGCAGC	2.0	2.0	essential	UTP15_-_72861621.23-P1P2|UTP15_-_72861666.23-P1P2
SMC4	P1	1-2	essential	SMC4_-_160117471.23-P1	GGGACCCGGAGCCGAAACAC	1.0	2.0	essential	SMC4_-_160117489.23-P1	ACCTCCCCGCTCCTACCGGC	2.0	3.0	essential	SMC4_-_160117471.23-P1|SMC4_-_160117489.23-P1
SMG1	P1P2	1-2	nonessential	SMG1_+_18937294.23-P1P2	GCGGCGGCACCAAGTATCCG	1.0	1.0	predicted	SMG1_-_18937299.23-P1P2	CGGAGCTGGAATGACTGGCC	2.0	2.0	predicted	SMG1_+_18937294.23-P1P2|SMG1_-_18937299.23-P1P2
RBBP4	P1P2	1-2	significant	RBBP4_-_33117042.23-P1P2	GGTGCAGTCCCCGGTACTGA	1.0	2.0	empirical	RBBP4_-_33117002.23-P1P2	TCACTGTTAGGCCATGTCGC	2.0	5.0	empirical	RBBP4_-_33117042.23-P1P2|RBBP4_-_33117002.23-P1P2
CLCC1	P1P2	1-2	significant	CLCC1_+_109506058.23-P1P2	GAGCACGCTGAAACCCTGGG	1.0	2.0	empirical	CLCC1_+_109506061.23-P1P2	AGGGTTTCAGCGTGCTTCCC	2.0	3.0	empirical	CLCC1_+_109506058.23-P1P2|CLCC1_+_109506061.23-P1P2
UTP20	P1P2	1-2	significant	UTP20_+_101674131.23-P1P2	GCTGAGGCAGCGGAGACCCG	1.0	1.0	empirical	UTP20_-_101674128.23-P1P2	TGCCTAAGCTCCCGCGCTCC	2.0	2.0	empirical	UTP20_+_101674131.23-P1P2|UTP20_-_101674128.23-P1P2
CCDC78	P1P2	1-2	nonessential	CCDC78_-_776828.23-P1P2	GGCGCAGACGTCCCCATCAG	1.0	1.0	predicted	CCDC78_-_776428.23-P1P2	TGGGGAAGCCGGGCGTGGAC	2.0	2.0	predicted	CCDC78_-_776828.23-P1P2|CCDC78_-_776428.23-P1P2
GSDMA	P1P2	1-2	nonessential	GSDMA_+_38119266.23-P1P2	GTAGGGCTCACTGGGTCTGT	1.0	1.0	predicted	GSDMA_+_38119296.23-P1P2	CAGACCCAGCTGCTGGATAC	2.0	2.0	predicted	GSDMA_+_38119266.23-P1P2|GSDMA_+_38119296.23-P1P2
C1D	P1P2	1-2	significant	C1D_+_68290088.23-P1P2	GACTGGAGTCGAAGGCCGTG	1.0	1.0	empirical	C1D_+_68289917.23-P1P2	ACAATGCTGCCCCAACGAAC	2.0	4.0	empirical	C1D_+_68290088.23-P1P2|C1D_+_68289917.23-P1P2
KIN	P1P2	1-2	nonessential	KIN_+_7829774.23-P1P2	GAGTGCCGGGACGAGGTGAG	1.0	1.0	predicted	KIN_-_7829906.23-P1P2	TGGTCGCCATGGGGAAGTCC	2.0	2.0	predicted	KIN_+_7829774.23-P1P2|KIN_-_7829906.23-P1P2
TIMM13	P1P2	1-2	significant	TIMM13_+_2427547.23-P1P2	GGGCGCACGCGGCCTCGGTC	1.0	2.0	empirical	TIMM13_-_2427532.23-P1P2	TGGAGGGCGGCTTCGGCTCC	2.0	1.0	empirical	TIMM13_+_2427547.23-P1P2|TIMM13_-_2427532.23-P1P2
TACC3	P1	1-2	significant	TACC3_-_1723252.23-P1	GGCGCGCCGGCGGCCATCAA	1.0	2.0	empirical	TACC3_-_1723216.23-P1	ACGGTTGCCTTCGCGCGGCC	2.0	4.0	empirical	TACC3_-_1723252.23-P1|TACC3_-_1723216.23-P1
MPHOSPH10	P1P2	1-2	significant	MPHOSPH10_-_71357812.23-P1P2	GAGCCATGGCGCCGCAGGTC	1.0	2.0	empirical	MPHOSPH10_-_71357866.23-P1P2	ACCCGTGGCTTTGCCGACTC	2.0	6.0	empirical	MPHOSPH10_-_71357812.23-P1P2|MPHOSPH10_-_71357866.23-P1P2
NANOG	P1P2	1-2	significant	NANOG_+_7942378.23-P1P2	GTAAGGAACTTGGCCTTTCA	1.0	3.0	empirical	NANOG_+_7942493.23-P1P2	CTGGAAACCCCTTTTTCCAC	2.0	1.0	empirical	NANOG_+_7942378.23-P1P2|NANOG_+_7942493.23-P1P2
EMC3	P2	1-2	significant	EMC3_+_10052774.23-P2	GGGCGCTGCTGCCCCAACAC	1.0	1.0	predicted	EMC3_+_10052758.23-P2	CAGAGAGTGCCCGCCTGTGC	2.0	2.0	predicted	EMC3_+_10052774.23-P2|EMC3_+_10052758.23-P2
SLC4A5	P1	1-2	nonessential	SLC4A5_+_74517447.23-P1	GGTGGAAGTAGCAGCCAGGG	1.0	1.0	predicted	SLC4A5_+_74517243.23-P1	TTCCCTAAGTCTGGAATCCC	2.0	2.0	predicted	SLC4A5_+_74517447.23-P1|SLC4A5_+_74517243.23-P1
EXOC3	P1P2	1-2	significant	EXOC3_-_443416.23-P1P2	GGCCGTAGAGGGTGAGTCGG	1.0	4.0	empirical	EXOC3_-_443413.23-P1P2	ACTCACCCTCTACGGCTACC	2.0	1.0	empirical	EXOC3_-_443416.23-P1P2|EXOC3_-_443413.23-P1P2
ABCF1	P2	1-2	significant	ABCF1_-_30546354.23-P2	GGAGAAGAATCGGATCAATA	1.0	1.0	predicted	ABCF1_-_30546344.23-P2	ATTCTTCTCCGGCTTGGCAC	2.0	2.0	predicted	ABCF1_-_30546354.23-P2|ABCF1_-_30546344.23-P2
PYROXD1	P1P2	1-2	significant	PYROXD1_-_21590691.23-P1P2	GGCAGCGCGCCCTCCCCCGA	1.0	3.0	empirical	PYROXD1_-_21590709.23-P1P2	CCACGAACTTCCCTGCCGTC	2.0	7.0	empirical	PYROXD1_-_21590691.23-P1P2|PYROXD1_-_21590709.23-P1P2
EEF2	P2	1-2	essential	EEF2_+_3984171.23-P2	GGACACGCTTCACTGATACC	1.0	1.0	predicted	EEF2_+_3984167.23-P2	TCCGGGTATCAGTGAAGCGC	2.0	2.0	predicted	EEF2_+_3984171.23-P2|EEF2_+_3984167.23-P2
SIGLEC14	P1P2	1-2	nonessential	SIGLEC14_-_52149990.23-P1P2	GACTCACCCCCCCACAGCAG	1.0	1.0	predicted	SIGLEC14_+_52150020.23-P1P2	CCAGGGCCCCAGCCCAGTCC	2.0	2.0	predicted	SIGLEC14_-_52149990.23-P1P2|SIGLEC14_+_52150020.23-P1P2
PUF60	P1P2	1-2	significant	PUF60_-_144911459.23-P1P2	GGGCTCACTTACGAGAGCTA	1.0	4.0	empirical	PUF60_-_144911439.23-P1P2	CCCCATGAGCGCGGGCGGCC	2.0	1.0	empirical	PUF60_-_144911459.23-P1P2|PUF60_-_144911439.23-P1P2
TTI1	P1P2	1-2	essential	TTI1_+_36661804.23-P1P2	GAGAGAAAGGCTGGAAGACG	1.0	1.0	essential	TTI1_+_36661799.23-P1P2	TACCTCGTCTTCCAGCCTTC	2.0	2.0	essential	TTI1_+_36661804.23-P1P2|TTI1_+_36661799.23-P1P2
MRPL45	P1P2	1-2	significant	MRPL45_+_36453156.23-P1P2	GGAGAACCCTTGAGGTATGG	1.0	6.0	empirical	MRPL45_+_36453159.23-P1P2	TACCTCAAGGGTTCTCTTGC	2.0	1.0	empirical	MRPL45_+_36453156.23-P1P2|MRPL45_+_36453159.23-P1P2
HNRNPM	P1	1-2	significant	HNRNPM_-_8509903.23-P1	GATGGCGGCAGGGGTCGAAG	1.0	3.0	empirical	HNRNPM_-_8509876.23-P1	CGTCTGGGCTTTGTGTGAGC	2.0	6.0	empirical	HNRNPM_-_8509903.23-P1|HNRNPM_-_8509876.23-P1
CHORDC1	P1P2	1-2	significant	CHORDC1_-_89955982.23-P1P2	GGACGGCTGCAGGAGATCCG	1.0	3.0	empirical	CHORDC1_-_89955894.23-P1P2	CTCTGTTGCGCCGCGTTCCC	2.0	4.0	empirical	CHORDC1_-_89955982.23-P1P2|CHORDC1_-_89955894.23-P1P2
SMARCB1	P2	1-2	significant	SMARCB1_-_24134004.23-P2	GGAGATACCCCTCACTCTGG	1.0	1.0	predicted	SMARCB1_+_24133953.23-P2	CCGTATGTTCCGAGGTTCTC	2.0	2.0	predicted	SMARCB1_-_24134004.23-P2|SMARCB1_+_24133953.23-P2
DNMT1	P1P2	1-2	significant	DNMT1_-_10305582.23-P1P2	GGTACGCGCCGGCATCTCGG	1.0	1.0	empirical	DNMT1_-_10305600.23-P1P2	CCGCGTCTGCTGAAGCCTCC	2.0	4.0	empirical	DNMT1_-_10305582.23-P1P2|DNMT1_-_10305600.23-P1P2
MRPL32	P1P2	1-2	significant	MRPL32_+_42972018.23-P1P2	GCTCCCCGGGCCGCAGACCA	1.0	2.0	empirical	MRPL32_-_42972023.23-P1P2	CGGCGAAACCACCAAGACCC	2.0	1.0	empirical	MRPL32_+_42972018.23-P1P2|MRPL32_-_42972023.23-P1P2
TRAPPC8	P1P2	1-2	significant	TRAPPC8_-_29523060.23-P1P2	GGGCCGGAACCGCCATGTTG	1.0	3.0	empirical	TRAPPC8_+_29523066.23-P1P2	TGACCAACCGGCAGTACTAC	2.0	8.0	empirical	TRAPPC8_-_29523060.23-P1P2|TRAPPC8_+_29523066.23-P1P2
WDR70	P1P2	1-2	significant	WDR70_-_37379443.23-P1P2	GGTTGTTTGGGCTGTCCCTG	1.0	4.0	empirical	WDR70_+_37379414.23-P1P2	CTGCAGTTGTTTGGGCTGTC	2.0	9.0	empirical	WDR70_-_37379443.23-P1P2|WDR70_+_37379414.23-P1P2
U2AF2	P1P2	1-2	nonessential	U2AF2_+_56166451.23-P1P2	GCATGCTGAGGCGGCCGCGT	1.0	1.0	predicted	U2AF2_-_56165795.23-P1P2	CCGCTTCGTGAAGGCCTCAC	2.0	2.0	predicted	U2AF2_+_56166451.23-P1P2|U2AF2_-_56165795.23-P1P2
BUB3	P1P2	1-2	essential	BUB3_-_124913930.23-P1P2	GTAGCCTGCGAGTGTTCTGA	1.0	3.0	essential	BUB3_-_124913938.23-P1P2	TGCTTCCCTCAGAACACTCC	2.0	5.0	essential	BUB3_-_124913930.23-P1P2|BUB3_-_124913938.23-P1P2
HARS2	P1P2	1-2	significant	HARS2_+_140071236.23-P1P2	GTGGGAAGAAGTCCGAGCAG	1.0	7.0	empirical	HARS2_+_140071077.23-P1P2	CAGCCTTCGTGACTAGTGAC	2.0	6.0	empirical	HARS2_+_140071236.23-P1P2|HARS2_+_140071077.23-P1P2
SNAPC4	P1P2	1-2	nonessential	SNAPC4_-_139271939.23-P1P2	GCACTGCTCCAGGCAGGCGA	1.0	1.0	predicted	SNAPC4_+_139271610.23-P1P2	CCCTCCACTGTGCCCATGGC	2.0	2.0	predicted	SNAPC4_-_139271939.23-P1P2|SNAPC4_+_139271610.23-P1P2
SNRPE	P1P2	1-2	essential	SNRPE_-_203830935.23-P1P2	GGGCCTGGGATAGTGGAGTA	1.0	3.0	essential	SNRPE_-_203830890.23-P1P2	CGTATTCTGACCCGAACCTC	2.0	2.0	essential	SNRPE_-_203830935.23-P1P2|SNRPE_-_203830890.23-P1P2
PPA2	P1P2	1-2	significant	PPA2_-_106395142.23-P1P2	GCGCGACCCGGTCCCTGCAC	1.0	9.0	empirical	PPA2_-_106395156.23-P1P2	GCGGTTGGGGACCAGTGCAC	2.0	4.0	empirical	PPA2_-_106395142.23-P1P2|PPA2_-_106395156.23-P1P2
CCT7	P1P2	1-2	essential	CCT7_-_73461472.23-P1P2	GCGGCCCGGTCTCGGAGAAG	1.0	1.0	essential	CCT7_-_73461481.23-P1P2	CTCTCCCCTCTTCTCCGAGC	2.0	2.0	essential	CCT7_-_73461472.23-P1P2|CCT7_-_73461481.23-P1P2
TULP1	P1P2	1-2	nonessential	TULP1_-_35480615.23-P1P2	GGAGGCCCACACCTCTCGGA	1.0	1.0	predicted	TULP1_-_35480631.23-P1P2	CTGCGGGATGAAACCCTCCC	2.0	2.0	predicted	TULP1_-_35480615.23-P1P2|TULP1_-_35480631.23-P1P2
RSL1D1	P2	1-2	significant	RSL1D1_+_11933720.23-P2	GATGATGTGGCACCTGAAAG	1.0	1.0	predicted	RSL1D1_-_11933355.23-P2	GTCTTACACTCCGGGGGTCC	2.0	2.0	predicted	RSL1D1_+_11933720.23-P2|RSL1D1_-_11933355.23-P2
TIMM8A	P1P2	1-2	significant	TIMM8A_-_100603638.23-P1P2	GAAACCCGCCGCGGAGGAAG	1.0	3.0	empirical	TIMM8A_-_100603477.23-P1P2	TCTGTCCTTGTACCGCGGGC	2.0	5.0	empirical	TIMM8A_-_100603638.23-P1P2|TIMM8A_-_100603477.23-P1P2
EIF4A1	P1P2	1-2	significant	EIF4A1_-_7476155.23-P1P2	GCACTCCGCCCTAGTTTCTA	1.0	1.0	empirical	EIF4A1_+_7476226.23-P1P2	CCTTCCGACGGGCCCGCCGC	2.0	4.0	empirical	EIF4A1_-_7476155.23-P1P2|EIF4A1_+_7476226.23-P1P2
AURKA	P1P2	1-2	significant	AURKA_-_54967108.23-P1P2	GCGCCAAGGACACTCAGGGA	1.0	7.0	empirical	AURKA_+_54967204.23-P1P2	ACCCGTCGGCTCCCACCTGC	2.0	2.0	empirical	AURKA_-_54967108.23-P1P2|AURKA_+_54967204.23-P1P2
ANKLE2	P1P2	1-2	significant	ANKLE2_+_133338375.23-P1P2	GCCGGGCGGCGGCGATGCTG	1.0	2.0	empirical	ANKLE2_+_133338404.23-P1P2	CCGAGAAGCCCGCGCCCCGC	2.0	1.0	empirical	ANKLE2_+_133338375.23-P1P2|ANKLE2_+_133338404.23-P1P2
ZNF718	ENST00000400172.3	1-2	nonessential	ZNF718_-_154974.23-ENST00000400172.3	GAAGATAAGATAAGATATAC	1.0	1.0	predicted	ZNF718_+_155065.23-ENST00000400172.3	CTACACATGTGAAGAATGTC	2.0	2.0	predicted	ZNF718_-_154974.23-ENST00000400172.3|ZNF718_+_155065.23-ENST00000400172.3
MRPL17	P1P2	1-2	essential	MRPL17_+_6704492.23-P1P2	GTCGCTGCAGCGATCTCCCA	1.0	1.0	essential	MRPL17_-_6704339.23-P1P2	TCTTGTCCACTCTGCGGGTC	2.0	7.0	essential	MRPL17_+_6704492.23-P1P2|MRPL17_-_6704339.23-P1P2
SRP14	P1P2	1-2	significant	SRP14_+_40331287.23-P1P2	GGTTGGAGAGCGAGCAGGTA	1.0	3.0	empirical	SRP14_-_40330986.23-P1P2	CTACCTTTCCCCACCCTGTC	2.0	3.0	empirical	SRP14_+_40331287.23-P1P2|SRP14_-_40330986.23-P1P2
NSF	ENST00000398238.4	1-2	significant	NSF_+_44668460.23-ENST00000398238.4	GGACCCCCAGAGCCCGTCAG	1.0	1.0	empirical	NSF_-_44668038.23-ENST00000398238.4	CCGTGAGGACGCGCGCGTCC	2.0	1.0	empirical	NSF_+_44668460.23-ENST00000398238.4|NSF_-_44668038.23-ENST00000398238.4
DDB1	P2	1-2	significant	DDB1_-_61081132.23-P2	GGAACGAAAAGTCCTCAATA	2.0	2.0	predicted	DDB1_-_61081136.23-P2	ACCGTATTGAGGACTTTTCC	3.0	3.0	predicted	DDB1_-_61081132.23-P2|DDB1_-_61081136.23-P2
MRPS34	P1P2	1-2	significant	MRPS34_+_1823083.23-P1P2	GGTGCGTCCGCGGCTGATCG	1.0	3.0	empirical	MRPS34_-_1822906.23-P1P2	CTCTTCGGCCTGGGCCGCCC	2.0	6.0	empirical	MRPS34_+_1823083.23-P1P2|MRPS34_-_1822906.23-P1P2
MRPL21	P1P2	1-2	essential	MRPL21_-_68671264.23-P1P2	GCGCCCTAAGGTGACCGTCA	1.0	3.0	essential	MRPL21_+_68671245.23-P1P2	TAAGGTGACCGTCAGGGAAC	2.0	4.0	essential	MRPL21_-_68671264.23-P1P2|MRPL21_+_68671245.23-P1P2
DHX9	P1P2	1-2	significant	DHX9_+_182808499.23-P1P2	GAAACGCACAGCAACTCGCA	1.0	1.0	empirical	DHX9_+_182808482.23-P1P2	TTTCGCCGATTCCTCCATGC	2.0	4.0	empirical	DHX9_+_182808499.23-P1P2|DHX9_+_182808482.23-P1P2
NUP93	P1P2	1-2	essential	NUP93_-_56764101.23-P1P2	GCCTCAAGCCGGCACCTGAG	1.0	3.0	essential	NUP93_-_56764090.23-P1P2	GCTTGAGGACGCGGCCGCCC	2.0	6.0	essential	NUP93_-_56764101.23-P1P2|NUP93_-_56764090.23-P1P2
RPF2	P1P2	1-2	essential	RPF2_-_111303321.23-P1P2	GGCGGTAGCGATGGACACTC	1.0	3.0	essential	RPF2_+_111303276.23-P1P2	CCTGGTTAAGAGTTGCAGGC	2.0	5.0	essential	RPF2_-_111303321.23-P1P2|RPF2_+_111303276.23-P1P2
ACTR3	P1P2	1-2	significant	ACTR3_+_114648069.23-P1P2	GTCCCAGGAGGGAGAAACGA	1.0	3.0	empirical	ACTR3_+_114648124.23-P1P2	ACCCTCCCAGCGGCTTTCTC	2.0	7.0	empirical	ACTR3_+_114648069.23-P1P2|ACTR3_+_114648124.23-P1P2
VMP1	P1P2	1-2	significant	VMP1_-_57785061.23-P1P2	GGCGGGTGTGAGAGTCCGTA	1.0	1.0	empirical	VMP1_-_57785088.23-P1P2	GATCTCAGGATCCTGGAAGC	2.0	2.0	empirical	VMP1_-_57785061.23-P1P2|VMP1_-_57785088.23-P1P2
WDR26	P1P2	1-2	significant	WDR26_+_224622428.23-P1P2	GGCGGATCCGAGGACAGAGG	1.0	2.0	empirical	WDR26_+_224622446.23-P1P2	CTCCGCTCTGCTCCCTGGTC	2.0	4.0	empirical	WDR26_+_224622428.23-P1P2|WDR26_+_224622446.23-P1P2
RAB6A	P1P2	1-2	nonessential	RAB6A_+_73472126.23-P1P2	GTCGCCCCGCGCCGCTCCAG	1.0	1.0	predicted	RAB6A_+_73471947.23-P1P2	CTGGCTTCCCAAAGCTAGGC	2.0	2.0	predicted	RAB6A_+_73472126.23-P1P2|RAB6A_+_73471947.23-P1P2
MLST8	P1P2	1-2	significant	MLST8_+_2255502.23-P1P2	GGGCCTCCGTACCTTACGGG	1.0	3.0	empirical	MLST8_-_2255521.23-P1P2	CCGTACCTTACGGGCGGCTC	2.0	4.0	empirical	MLST8_+_2255502.23-P1P2|MLST8_-_2255521.23-P1P2
EIF2S2	P1P2	1-2	significant	EIF2S2_-_32699803.23-P1P2	GGCGCGGCTGCCTCACATGG	1.0	1.0	empirical	EIF2S2_-_32699538.23-P1P2	CACTGGGTGCCGGGGGTGCC	2.0	7.0	empirical	EIF2S2_-_32699803.23-P1P2|EIF2S2_-_32699538.23-P1P2
CDCA8	P1P2	1-2	essential	CDCA8_+_38158230.23-P1P2	GACCTGCGGTCCCGAGACAA	1.0	2.0	essential	CDCA8_-_38158209.23-P1P2	GTGAGAGAGAGCGGCTCTAC	2.0	3.0	essential	CDCA8_+_38158230.23-P1P2|CDCA8_-_38158209.23-P1P2
RPS10-NUDT3	P1P2	1-2	essential	RPS10-NUDT3_-_34393845.23-P1P2	GTCCGGTACCGGGGCTGGAA	1.0	2.0	essential	RPS10-NUDT3_-_34393835.23-P1P2	GGTACCGGACCCTGCAGCCC	2.0	1.0	essential	RPS10-NUDT3_-_34393845.23-P1P2|RPS10-NUDT3_-_34393835.23-P1P2
KAT8	P1	1-2	significant	KAT8_-_31129050.23-P1	GGTTGCGGCGGGGACTTCAG	1.0	1.0	empirical	KAT8_-_31129029.23-P1	CCGCAGCAGCTCCCTGTGCC	2.0	3.0	empirical	KAT8_-_31129050.23-P1|KAT8_-_31129029.23-P1
PMPCA	P1P2	1-2	significant	PMPCA_-_139305175.23-P1P2	GTGCGGGGCTCGGGTTCTTG	1.0	2.0	empirical	PMPCA_-_139305149.23-P1P2	CGTCGCCGCCAGCACCACAC	2.0	1.0	empirical	PMPCA_-_139305175.23-P1P2|PMPCA_-_139305149.23-P1P2
JMJD6	P1P2	1-2	nonessential	JMJD6_+_74722579.23-P1P2	GGGCTGCGCCGAGGTCGTAG	1.0	1.0	predicted	JMJD6_+_74722315.23-P1P2	CTACGAGGTCCCGGGCGCTC	2.0	2.0	predicted	JMJD6_+_74722579.23-P1P2|JMJD6_+_74722315.23-P1P2
RPLP2	P1P2	1-2	significant	RPLP2_+_810206.23-P1P2	GGCGGGCGGAGAGGACGCGA	1.0	3.0	empirical	RPLP2_+_809986.23-P1P2	AGGTCGCACGCGTGAGACTC	2.0	6.0	empirical	RPLP2_+_810206.23-P1P2|RPLP2_+_809986.23-P1P2
OR2T29	ENST00000328570.3	1-2	nonessential	OR2T29_+_248722733.23-ENST00000328570.3	GGGTTGGATTTCATCCTCAT	1.0	1.0	predicted	OR2T29_-_248722384.23-ENST00000328570.3	TGTCCTCATGAACCATAGGC	2.0	2.0	predicted	OR2T29_+_248722733.23-ENST00000328570.3|OR2T29_-_248722384.23-ENST00000328570.3
RPA1	P1P2	1-2	essential	RPA1_-_1733358.23-P1P2	GGGAAGCTGGAGCTGTTGCG	1.0	1.0	essential	RPA1_-_1733303.23-P1P2	GAGAAGTTGCGCGCACCGCC	2.0	3.0	essential	RPA1_-_1733358.23-P1P2|RPA1_-_1733303.23-P1P2
WDR12	P1P2	1-2	essential	WDR12_+_203776353.23-P1P2	GTTCTGCAGAGGAGACCGGA	1.0	2.0	essential	WDR12_-_203776953.23-P1P2	CTATCGGCCACCGTCGACCC	2.0	8.0	essential	WDR12_+_203776353.23-P1P2|WDR12_-_203776953.23-P1P2
RAD51	P1P2	1-2	essential	RAD51_+_40987418.23-P1P2	GAAGCGCCGCACTCTCCTTA	1.0	1.0	essential	RAD51_+_40987382.23-P1P2	CTGGCGGACCGCGCGCAGCC	2.0	5.0	essential	RAD51_+_40987418.23-P1P2|RAD51_+_40987382.23-P1P2
TMEM258	P1P2	1-2	significant	TMEM258_+_61560010.23-P1P2	GAAATGGTGAGAGCGTTGAG	1.0	5.0	empirical	TMEM258_+_61560026.23-P1P2	TTTTGCCCCGCGAAGGCTAC	2.0	2.0	empirical	TMEM258_+_61560010.23-P1P2|TMEM258_+_61560026.23-P1P2
RPL26L1	P1P2	1-2	nonessential	RPL26L1_-_172386481.23-P1P2	GCTAGTAGCCGGGTGAGTGG	1.0	1.0	predicted	RPL26L1_+_172386510.23-P1P2	CCCCGTGAGACCCTGCCCTC	2.0	2.0	predicted	RPL26L1_-_172386481.23-P1P2|RPL26L1_+_172386510.23-P1P2
EIF3M	P1P2	1-2	essential	EIF3M_-_32605424.23-P1P2	GTGGAGTGTCCGCTGTGCCC	1.0	5.0	essential	EIF3M_-_32605405.23-P1P2	CTCGCAAGACCACGCCGACC	2.0	1.0	essential	EIF3M_-_32605424.23-P1P2|EIF3M_-_32605405.23-P1P2
SF3B2	P1P2	1-2	essential	SF3B2_-_65820053.23-P1P2	GAAGCGGAGCCTGGTTACCC	1.0	1.0	essential	SF3B2_-_65819849.23-P1P2	CAGGAAGGCGCGCGACCAAC	2.0	4.0	essential	SF3B2_-_65820053.23-P1P2|SF3B2_-_65819849.23-P1P2
REXO2	P1P2	1-2	essential	REXO2_-_114310257.23-P1P2	GGCTGGTCCCGGGTGATGCT	1.0	5.0	essential	REXO2_+_114310243.23-P1P2	GGTGATGCTAGGCGGCTCCC	2.0	3.0	essential	REXO2_-_114310257.23-P1P2|REXO2_+_114310243.23-P1P2
PSMA7	P1P2	1-2	significant	PSMA7_+_60718471.23-P1P2	GTCGCCGGCAGCGCAGGACA	1.0	4.0	empirical	PSMA7_-_60718363.23-P1P2	GCATGAGCTACGACCGCGCC	2.0	2.0	empirical	PSMA7_+_60718471.23-P1P2|PSMA7_-_60718363.23-P1P2
NHLRC2	P1P2	1-2	significant	NHLRC2_+_115614607.23-P1P2	GTTCCGCCGGGCTCCCGATG	1.0	2.0	empirical	NHLRC2_+_115614433.23-P1P2	GGGAACTGCGCCGATTTGGC	2.0	1.0	empirical	NHLRC2_+_115614607.23-P1P2|NHLRC2_+_115614433.23-P1P2
PMF1	P1P2	1-2	essential	PMF1_+_156183115.23-P1P2	GGTGAATACCCTGACTCCTA	1.0	8.0	essential	PMF1_-_156182834.23-P1P2	AGATTGGCGCTACTTGCTTC	2.0	3.0	essential	PMF1_+_156183115.23-P1P2|PMF1_-_156182834.23-P1P2
GEMIN5	P1P2	1-2	essential	GEMIN5_+_154317730.23-P1P2	GGCGTGAGGCTACGAGCGGT	1.0	1.0	essential	GEMIN5_+_154317734.23-P1P2	CTCGTAGCCTCACGCCTTAC	2.0	3.0	essential	GEMIN5_+_154317730.23-P1P2|GEMIN5_+_154317734.23-P1P2
POLRMT	P1P2	1-2	significant	POLRMT_+_633505.23-P1P2	GGGAGCGGCGTGCGTAATGT	1.0	1.0	empirical	POLRMT_+_633481.23-P1P2	CTCCGCGGCCCCAGCAAAGC	2.0	4.0	empirical	POLRMT_+_633505.23-P1P2|POLRMT_+_633481.23-P1P2
TSR1	P2	1-2	significant	TSR1_-_2241289.23-P2	GGCAGCTCCCCGCCCAGTGA	1.0	1.0	predicted	TSR1_-_2241066.23-P2	CCCGGGGTTCTTGACTCGAC	2.0	2.0	predicted	TSR1_-_2241289.23-P2|TSR1_-_2241066.23-P2
UQCC2	P1P2	1-2	significant	UQCC2_-_33679502.23-P1P2	GCCGCCTTAGCGGGAGGAGT	1.0	4.0	empirical	UQCC2_+_33679456.23-P1P2	CCATCTTGGGCCCCGCGTGC	2.0	2.0	empirical	UQCC2_-_33679502.23-P1P2|UQCC2_+_33679456.23-P1P2
CYP2A13	P1P2	1-2	nonessential	CYP2A13_-_41594703.23-P1P2	GGGGTCCTAGCAGGAAAGAC	1.0	1.0	predicted	CYP2A13_+_41594737.23-P1P2	GGGGGCGAAGCATCCCAGTC	2.0	2.0	predicted	CYP2A13_-_41594703.23-P1P2|CYP2A13_+_41594737.23-P1P2
HSPA5	P1P2	1-2	significant	HSPA5_+_128003614.23-P1P2	GGCGACGGTGAGGTCGACGC	1.0	1.0	empirical	HSPA5_+_128003624.23-P1P2	CACCGTCGCCTACTCGGCTC	2.0	4.0	empirical	HSPA5_+_128003614.23-P1P2|HSPA5_+_128003624.23-P1P2
FDPS	P1P2	1-2	essential	FDPS_+_155278669.23-P1P2	GGCTCCGCGATCGGCTCTGT	1.0	1.0	essential	FDPS_-_155278687.23-P1P2	CGATCGGCTCTGTGGGTCGC	2.0	3.0	essential	FDPS_+_155278669.23-P1P2|FDPS_-_155278687.23-P1P2
CHMP6	P1P2	1-2	essential	CHMP6_-_78965692.23-P1P2	GGGTGGCGATTGGACTTGGT	1.0	3.0	essential	CHMP6_+_78965716.23-P1P2	TGGGTAACCTGTTCGGCCGC	2.0	1.0	essential	CHMP6_-_78965692.23-P1P2|CHMP6_+_78965716.23-P1P2
RBM28	P1P2	1-2	essential	RBM28_-_127983894.23-P1P2	GGGACGCGAGCAAACTAGGC	1.0	5.0	essential	RBM28_-_127983855.23-P1P2	GGTCTCATGGCCGGCCTGAC	2.0	1.0	essential	RBM28_-_127983894.23-P1P2|RBM28_-_127983855.23-P1P2
RPL6	P1P2	1-2	essential	RPL6_-_112847347.23-P1P2	GGTTCGGATGGCGAAGGATT	1.0	2.0	essential	RPL6_-_112847189.23-P1P2	TCCGGTTCTTCGCCACTCTC	2.0	1.0	essential	RPL6_-_112847347.23-P1P2|RPL6_-_112847189.23-P1P2
FARSA	P1P2	1-2	significant	FARSA_-_13044322.23-P1P2	GCCCGTGGCAAGGGGACTGT	1.0	4.0	empirical	FARSA_+_13044503.23-P1P2	CCATGACTCCTTCCAGTGTC	2.0	2.0	empirical	FARSA_-_13044322.23-P1P2|FARSA_+_13044503.23-P1P2
MVK	P1P2	1-2	significant	MVK_-_110011650.23-P1P2	GCGGCTTCGGCGCGGAGGGG	1.0	1.0	empirical	MVK_-_110011647.23-P1P2	CTCCGCGCCGAAGCCGGAGC	2.0	3.0	empirical	MVK_-_110011650.23-P1P2|MVK_-_110011647.23-P1P2
ABCE1	P1P2	1-2	essential	ABCE1_-_146019502.23-P1P2	GGCCGTGAGAACACGCTGTG	1.0	2.0	essential	ABCE1_-_146019516.23-P1P2	TCACTTTTCAGCCACACAGC	2.0	3.0	essential	ABCE1_-_146019502.23-P1P2|ABCE1_-_146019516.23-P1P2
NSMCE1	P1P2	1-2	essential	NSMCE1_+_27280033.23-P1P2	GCGCGGCCTGGGATGCGCTT	1.0	4.0	essential	NSMCE1_-_27280049.23-P1P2	GGGATGCGCTTGGGCTCCCC	2.0	6.0	essential	NSMCE1_+_27280033.23-P1P2|NSMCE1_-_27280049.23-P1P2
KIF18B	P1P2	1-2	significant	KIF18B_+_43025067.23-P1P2	GGGGCGCTCTCTCCCGGTGT	1.0	1.0	empirical	KIF18B_-_43025076.23-P1P2	GTGTGGGTACTGCTGTCTGC	2.0	2.0	empirical	KIF18B_+_43025067.23-P1P2|KIF18B_-_43025076.23-P1P2
NLE1	P1P2	1-2	essential	NLE1_+_33469287.23-P1P2	GACGTGGGGACGCAGGATGG	1.0	3.0	essential	NLE1_-_33469053.23-P1P2	GTGGACATCACCCCGGACAC	2.0	8.0	essential	NLE1_+_33469287.23-P1P2|NLE1_-_33469053.23-P1P2
CDT1	P1P2	1-2	significant	CDT1_+_88870237.23-P1P2	GGTGACGCGGCGCTGCTCCA	1.0	4.0	empirical	CDT1_+_88870234.23-P1P2	CCATGGAGCAGCGCCGCGTC	2.0	2.0	empirical	CDT1_+_88870237.23-P1P2|CDT1_+_88870234.23-P1P2
RPS16	P1P2	1-2	essential	RPS16_+_39926539.23-P1P2	GAGGTTGTCTAGTCCACGCT	1.0	3.0	essential	RPS16_-_39926387.23-P1P2	GAGCTCACGGGGCCCCTGTC	2.0	5.0	essential	RPS16_+_39926539.23-P1P2|RPS16_-_39926387.23-P1P2
LSM6	P1P2	1-2	essential	LSM6_-_147096941.23-P1P2	GTCGTGGGGCGCCTGGAGTG	1.0	6.0	essential	LSM6_-_147096913.23-P1P2	CCGCGGATGATCCCAGCCAC	2.0	4.0	essential	LSM6_-_147096941.23-P1P2|LSM6_-_147096913.23-P1P2
CCT5	P1P2	1-2	significant	CCT5_+_10250403.23-P1P2	GCAACCGGCGGAGACCGCTA	1.0	1.0	empirical	CCT5_+_10250415.23-P1P2	CCGGTTGGGGGGAAGTAATC	2.0	5.0	empirical	CCT5_+_10250403.23-P1P2|CCT5_+_10250415.23-P1P2
TARS2	P1P2	1-2	essential	TARS2_-_150459943.23-P1P2	GGAACATGGCCCTGTATCAG	1.0	2.0	essential	TARS2_-_150459914.23-P1P2	GTGCCTACATCCTCAAACAC	2.0	4.0	essential	TARS2_-_150459943.23-P1P2|TARS2_-_150459914.23-P1P2
PRKRIP1	P2	1-2	significant	PRKRIP1_+_102004333.23-P2	GGAAGAGGCGCAGGAAGCCA	1.0	1.0	predicted	PRKRIP1_-_102004751.23-P2	AAGCTGTTCTGCTCCCGAGC	2.0	2.0	predicted	PRKRIP1_+_102004333.23-P2|PRKRIP1_-_102004751.23-P2
RRM1	P1P2	1-2	essential	RRM1_+_4116464.23-P1P2	GCAGGATGACAAAGCCGAGG	1.0	10.0	essential	RRM1_+_4116116.23-P1P2	GTTCTTTCCCCTGAGCAGCC	2.0	4.0	essential	RRM1_+_4116464.23-P1P2|RRM1_+_4116116.23-P1P2
RABGGTB	P1P2	1-2	essential	RABGGTB_+_76251918.23-P1P2	GAGAGAGCAGGGTCAGTTCC	1.0	5.0	essential	RABGGTB_-_76251996.23-P1P2	ACCCATCCGGACAGCAGCGC	2.0	2.0	essential	RABGGTB_+_76251918.23-P1P2|RABGGTB_-_76251996.23-P1P2
NDUFB4	P1P2	1-2	significant	NDUFB4_+_120315227.23-P1P2	GGCAGAGTGCGCAGGCTCGA	1.0	2.0	empirical	NDUFB4_+_120315370.23-P1P2	CCGAGGGCTCATCGTGAGTC	2.0	3.0	empirical	NDUFB4_+_120315227.23-P1P2|NDUFB4_+_120315370.23-P1P2
CCDC174	P1P2	1-2	essential	CCDC174_-_14693290.23-P1P2	GCGACGGAGGTAGGCTTACG	1.0	1.0	essential	CCDC174_-_14693310.23-P1P2	TTTCTACCCGACACAGGCCC	2.0	4.0	essential	CCDC174_-_14693290.23-P1P2|CCDC174_-_14693310.23-P1P2
C1QBP	P1P2	1-2	significant	C1QBP_-_5342366.23-P1P2	GGACGGAGGAGCCCAGCACA	1.0	4.0	empirical	C1QBP_-_5342105.23-P1P2	GGAATAGGGCCTGCAACCGC	2.0	10.0	empirical	C1QBP_-_5342366.23-P1P2|C1QBP_-_5342105.23-P1P2
RPL35	P1P2	1-2	significant	RPL35_+_127624168.23-P1P2	GTGGTGAGAGCTGCGGAATC	1.0	8.0	empirical	RPL35_-_127624006.23-P1P2	GGGTTACTCTGCCCAAGGCC	2.0	2.0	empirical	RPL35_+_127624168.23-P1P2|RPL35_-_127624006.23-P1P2
NAA25	P1P2	1-2	significant	NAA25_+_112546552.23-P1P2	GGCGACGCGGGGCCATGTGC	1.0	1.0	empirical	NAA25_-_112546549.23-P1P2	AACGACAGGCGCCTCCGGCC	2.0	2.0	empirical	NAA25_+_112546552.23-P1P2|NAA25_-_112546549.23-P1P2
PRPF31	P1P2	1-2	significant	PRPF31_-_54619172.23-P1P2	GGAAACAGTGGTGCGCGGAG	1.0	2.0	empirical	PRPF31_-_54619200.23-P1P2	CGTGGTCTCCATCACACTCC	2.0	3.0	empirical	PRPF31_-_54619172.23-P1P2|PRPF31_-_54619200.23-P1P2
TADA2A	P1P2	1-2	nonessential	TADA2A_-_35767029.23-P1P2	GCTCTTTGGCGCGGATTAGG	1.0	1.0	predicted	TADA2A_-_35766991.23-P1P2	CCGGGCTTTGCGTGCGCGCC	2.0	2.0	predicted	TADA2A_-_35767029.23-P1P2|TADA2A_-_35766991.23-P1P2
MRPL43	P1P2	1-2	essential	MRPL43_+_102747000.23-P1P2	GTGGCAACGACTCCCCGGGT	1.0	4.0	essential	MRPL43_-_102747237.23-P1P2	CGCTGCTTAGGCTCCGCGGC	2.0	1.0	essential	MRPL43_+_102747000.23-P1P2|MRPL43_-_102747237.23-P1P2
EIF3B	P1P2	1-2	significant	EIF3B_-_2394542.23-P1P2	GGCCGCGGAGCCCTGCGAGT	1.0	3.0	empirical	EIF3B_-_2394510.23-P1P2	ACTCTCCCAGGCCGCACCGC	2.0	4.0	empirical	EIF3B_-_2394542.23-P1P2|EIF3B_-_2394510.23-P1P2
MED21	P1P2	1-2	essential	MED21_-_27175714.23-P1P2	GGGCGCCACCGCGAACTCGG	1.0	6.0	essential	MED21_-_27175691.23-P1P2	GAGAGAGCGCTTTATGCCGC	2.0	10.0	essential	MED21_-_27175714.23-P1P2|MED21_-_27175691.23-P1P2
PPME1	P1P2	1-2	significant	PPME1_-_73882402.23-P1P2	GGAGCGAGTCGTGACCGGTT	1.0	2.0	empirical	PPME1_+_73882513.23-P1P2	ACCTCTACCCGGCAGCGGGC	2.0	6.0	empirical	PPME1_-_73882402.23-P1P2|PPME1_+_73882513.23-P1P2
SNAPC2	P1P2	1-2	significant	SNAPC2_-_7985249.23-P1P2	GGCGCCTGCCTCTTTCTGAG	1.0	2.0	empirical	SNAPC2_+_7985235.23-P1P2	CTTTCTGAGCGGCATGAAGC	2.0	4.0	empirical	SNAPC2_-_7985249.23-P1P2|SNAPC2_+_7985235.23-P1P2
RPP30	P1P2	1-2	essential	RPP30_+_92631924.23-P1P2	GGGGACATCCCAGAGACTCT	1.0	6.0	essential	RPP30_-_92631746.23-P1P2	TGCTGAAGTCCCATGACCGC	2.0	3.0	essential	RPP30_+_92631924.23-P1P2|RPP30_-_92631746.23-P1P2
PSMG2	P1P2	1-2	nonessential	PSMG2_+_12703052.23-P1P2	GGCGGCCCTGGCAAGAACGA	1.0	1.0	predicted	PSMG2_-_12703261.23-P1P2	TATTTCTCCCAAGGCACCGC	2.0	2.0	predicted	PSMG2_+_12703052.23-P1P2|PSMG2_-_12703261.23-P1P2
DNAJC11	P1P2	1-2	significant	DNAJC11_+_6761910.23-P1P2	GTGTCCCTGACGCGGATCAC	1.0	1.0	empirical	DNAJC11_-_6761928.23-P1P2	TGACGCGGATCACTGGCCCC	2.0	2.0	empirical	DNAJC11_+_6761910.23-P1P2|DNAJC11_-_6761928.23-P1P2
SNRPG	P1P2	1-2	essential	SNRPG_-_70520494.23-P1P2	GGACAGCGCCGGGTGACCAG	1.0	7.0	essential	SNRPG_-_70520827.23-P1P2	TGCGTTGCGTTCCAAGGCAC	2.0	4.0	essential	SNRPG_-_70520494.23-P1P2|SNRPG_-_70520827.23-P1P2
KIF14	P1P2	1-2	significant	KIF14_+_200589734.23-P1P2	GGTGCGGACGCTTTCCCTAC	1.0	1.0	empirical	KIF14_+_200589810.23-P1P2	CTCGACACAGTCCCCACGCC	2.0	2.0	empirical	KIF14_+_200589734.23-P1P2|KIF14_+_200589810.23-P1P2
EXOC1	P1P2	1-2	significant	EXOC1_+_56719956.23-P1P2	GCGGCCGAAGGCTTACCGCA	1.0	1.0	empirical	EXOC1_-_56720023.23-P1P2	GTCAGCTCGTCTGTCCGCCC	2.0	7.0	empirical	EXOC1_+_56719956.23-P1P2|EXOC1_-_56720023.23-P1P2
PSMC5	P1P2	1-2	significant	PSMC5_-_61904879.23-P1P2	GTGACGGACCAGAGCAGGTA	1.0	6.0	empirical	PSMC5_-_61904830.23-P1P2	CCGGCATCCGAGCCGTCTTC	2.0	3.0	empirical	PSMC5_-_61904879.23-P1P2|PSMC5_-_61904830.23-P1P2
SRP19	P1P2	1-2	significant	SRP19_+_112197015.23-P1P2	GAGAAACCCGGCAGAAACCC	1.0	1.0	empirical	SRP19_+_112197012.23-P1P2	CCCGGGTTTCTGCCGGGTTC	2.0	3.0	empirical	SRP19_+_112197015.23-P1P2|SRP19_+_112197012.23-P1P2
TAF1B	P1P2	1-2	significant	TAF1B_-_9983662.23-P1P2	GCCGGCTGTGGAAGCTCCCG	1.0	1.0	empirical	TAF1B_+_9983626.23-P1P2	GGGTAACGGGTCCCGGCTGC	2.0	3.0	empirical	TAF1B_-_9983662.23-P1P2|TAF1B_+_9983626.23-P1P2
CCDC144A	P1P2	1-2	nonessential	CCDC144A_-_16593812.23-P1P2	GCCCTAGCGTCGGGAGCCAG	1.0	1.0	predicted	CCDC144A_-_16593586.23-P1P2	CCGCCAAGCCAACAGCCACC	2.0	2.0	predicted	CCDC144A_-_16593812.23-P1P2|CCDC144A_-_16593586.23-P1P2
RPS29	P2	1-2	significant	RPS29_+_50065387.23-P2	GTGTTCGGGGAGGATTCCGA	1.0	1.0	predicted	RPS29_-_50065393.23-P2	AGGGTTTCAGCTGTTGACGC	2.0	2.0	predicted	RPS29_+_50065387.23-P2|RPS29_-_50065393.23-P2
SNRPB	P1P2	1-2	essential	SNRPB_+_2451405.23-P1P2	GGGTAGCGGCGGCGGGAAAT	1.0	6.0	essential	SNRPB_+_2451365.23-P1P2	GATTCGCCTCCTCAGAGGCC	2.0	4.0	essential	SNRPB_+_2451405.23-P1P2|SNRPB_+_2451365.23-P1P2
SNRPF	P1P2	1-2	essential	SNRPF_-_96252774.23-P1P2	GAACTGCGGCTCGGGACCTG	1.0	2.0	essential	SNRPF_-_96252795.23-P1P2	TCGTGACTACAGCAGGTACC	2.0	5.0	essential	SNRPF_-_96252774.23-P1P2|SNRPF_-_96252795.23-P1P2
ZNF24	P1P2	1-2	nonessential	ZNF24_+_32924385.23-P1P2	GCTGGGAAAAGGCTTGTGAA	1.0	1.0	predicted	ZNF24_-_32924370.23-P1P2	TGGACAGCGAAGCTGCTGCC	2.0	2.0	predicted	ZNF24_+_32924385.23-P1P2|ZNF24_-_32924370.23-P1P2
RHPN1	P1P2	1-2	nonessential	RHPN1_+_144451061.23-P1P2	GAGGGCCGCCCGCACCACCT	1.0	1.0	predicted	RHPN1_-_144451032.23-P1P2	CGACTGTCCCTCCTGAGTGC	2.0	2.0	predicted	RHPN1_+_144451061.23-P1P2|RHPN1_-_144451032.23-P1P2
CEP97	P1P2	1-2	nonessential	CEP97_+_101443780.23-P1P2	GGCCGCGCGAAGGCTTCTGG	1.0	1.0	predicted	CEP97_-_101443523.23-P1P2	TATTTGCTGCTTGCTAATAC	2.0	2.0	predicted	CEP97_+_101443780.23-P1P2|CEP97_-_101443523.23-P1P2
PET117	P1P2	1-2	significant	PET117_-_18118759.23-P1P2	GGTCGACCTGGGGCCTCTCG	1.0	1.0	empirical	PET117_+_18118767.23-P1P2	CTCGGTTCCTCAGCTCCTCC	2.0	8.0	empirical	PET117_-_18118759.23-P1P2|PET117_+_18118767.23-P1P2
MARS2	P1P2	1-2	significant	MARS2_+_198570142.23-P1P2	GCGTCCTAGCAGGCGGAGGA	1.0	4.0	empirical	MARS2_+_198570146.23-P1P2	CCGCCTGCTAGGACGCACGC	2.0	5.0	empirical	MARS2_+_198570142.23-P1P2|MARS2_+_198570146.23-P1P2
RRP7A	P1P2	1-2	significant	RRP7A_-_42915735.23-P1P2	GCTCACCTGCGTAGCCCAGT	1.0	2.0	empirical	RRP7A_+_42915752.23-P1P2	GGTCCCGCGCGGCGCACTTC	2.0	1.0	empirical	RRP7A_-_42915735.23-P1P2|RRP7A_+_42915752.23-P1P2
SF1	P1P2	1-2	significant	SF1_+_64545784.23-P1P2	GCGCTCCCCGGGCCCAAAGG	1.0	7.0	empirical	SF1_+_64545972.23-P1P2	GTCCTCTCACGCGGCGGGCC	2.0	1.0	empirical	SF1_+_64545784.23-P1P2|SF1_+_64545972.23-P1P2
SNUPN	P1P2	1-2	significant	SNUPN_+_75918041.23-P1P2	GGCAGGTGATTCGTCGGCCC	1.0	1.0	empirical	SNUPN_+_75918062.23-P1P2	TGGGAAGCTAGGTCCGCCCC	2.0	8.0	empirical	SNUPN_+_75918041.23-P1P2|SNUPN_+_75918062.23-P1P2
AURKB	P1P2	1-2	essential	AURKB_-_8113518.23-P1P2	GCTGTCGGCCGTAGGGCCAG	1.0	6.0	essential	AURKB_-_8113837.23-P1P2	CCTGTCGCAGGCCTTGCGCC	2.0	3.0	essential	AURKB_-_8113518.23-P1P2|AURKB_-_8113837.23-P1P2
H2AFZ	P1P2	1-2	significant	H2AFZ_+_100871399.23-P1P2	GCGCGGTGCGACGAAGGAGT	1.0	4.0	empirical	H2AFZ_-_100871162.23-P1P2	CGGATCTCGCGGCGGGCGGC	2.0	6.0	empirical	H2AFZ_+_100871399.23-P1P2|H2AFZ_-_100871162.23-P1P2
NFS1	P1P2	1-2	significant	NFS1_+_34287226.23-P1P2	GTGCAGCGGCTTCGGAAGGT	1.0	3.0	empirical	NFS1_-_34287220.23-P1P2	GCGGGACCATGCTGCTCCGC	2.0	4.0	empirical	NFS1_+_34287226.23-P1P2|NFS1_-_34287220.23-P1P2
CDC7	P1P2	1-2	significant	CDC7_+_91966607.23-P1P2	GGTCGGAGGGATCCGAAGGG	1.0	10.0	empirical	CDC7_+_91966603.23-P1P2	GCCCCCCTTCGGATCCCTCC	2.0	2.0	empirical	CDC7_+_91966607.23-P1P2|CDC7_+_91966603.23-P1P2
LSM10	P1P2	1-2	significant	LSM10_-_36863497.23-P1P2	GACCGGGCCGCTCTGTCCTC	1.0	5.0	empirical	LSM10_-_36863481.23-P1P2	GGTCGCCGGCATGGTTTCTC	2.0	1.0	empirical	LSM10_-_36863497.23-P1P2|LSM10_-_36863481.23-P1P2
TFRC	P1P2	1-2	significant	TFRC_+_195808926.23-P1P2	GATCGGGTGGCGGCTCGGGA	1.0	4.0	empirical	TFRC_+_195808942.23-P1P2	GATATCCCGACGCTCTGAGC	2.0	5.0	empirical	TFRC_+_195808926.23-P1P2|TFRC_+_195808942.23-P1P2
POLR2C	P1P2	1-2	essential	POLR2C_-_57496616.23-P1P2	GCACCGCGGAGCAGACGCGG	1.0	2.0	essential	POLR2C_-_57496613.23-P1P2	CGTCTGCTCCGCGGTGACTC	2.0	1.0	essential	POLR2C_-_57496616.23-P1P2|POLR2C_-_57496613.23-P1P2
CHAF1A	P1P2	1-2	significant	CHAF1A_-_4402710.23-P1P2	GAGAGCAGCGGCCGCCTGAG	1.0	4.0	empirical	CHAF1A_+_4402728.23-P1P2	GAGAGGAGGTCGAGCTGCCC	2.0	1.0	empirical	CHAF1A_-_4402710.23-P1P2|CHAF1A_+_4402728.23-P1P2
NDOR1	P1P2	1-2	significant	NDOR1_+_140100172.23-P1P2	GACTAGAAGGCAGTTCCCGC	1.0	3.0	empirical	NDOR1_-_140100218.23-P1P2	GTGGTCTGGTCTGAGACTAC	2.0	6.0	empirical	NDOR1_+_140100172.23-P1P2|NDOR1_-_140100218.23-P1P2
SDE2	P1P2	1-2	significant	SDE2_+_226187037.23-P1P2	GGGCGCCTGGTGTCTCAGAG	1.0	1.0	empirical	SDE2_+_226187030.23-P1P2	CAAGCCTCTCTGAGACACCC	2.0	6.0	empirical	SDE2_+_226187037.23-P1P2|SDE2_+_226187030.23-P1P2
SIN3A	P2	1-2	significant	SIN3A_+_75747995.23-P2	GCTGGGACCGAGCTGAGGGG	1.0	2.0	empirical	SIN3A_-_75748095.23-P2	AATCTCAGGCGTTTGGGGGC	2.0	1.0	empirical	SIN3A_+_75747995.23-P2|SIN3A_-_75748095.23-P2
SGPP1	P1P2	1-2	nonessential	SGPP1_+_64194760.23-P1P2	GTCACCCGGCAGACTCCGGA	1.0	1.0	predicted	SGPP1_+_64194764.23-P1P2	GAGTCTGCCGGGTGACGGCC	2.0	2.0	predicted	SGPP1_+_64194760.23-P1P2|SGPP1_+_64194764.23-P1P2
OIP5	P1P2	1-2	significant	OIP5_-_41624746.23-P1P2	GAACGTGAGCGATGCCGCAG	1.0	1.0	empirical	OIP5_-_41624496.23-P1P2	ACTCGGTGCACCTCGCCTGC	2.0	3.0	empirical	OIP5_-_41624746.23-P1P2|OIP5_-_41624496.23-P1P2
LSM7	P1P2	1-2	essential	LSM7_+_2328561.23-P1P2	GGCCACACGGCGCGACAAGA	1.0	5.0	essential	LSM7_+_2328574.23-P1P2	TGTGGCTCTTCGCAGGCACC	2.0	4.0	essential	LSM7_+_2328561.23-P1P2|LSM7_+_2328574.23-P1P2
ACTB	P1P2	1-2	nonessential	ACTB_-_5570191.23-P1P2	GACGGGCGGCGGATCGGCAA	1.0	1.0	predicted	ACTB_+_5570130.23-P1P2	CGGTCGGCTGGCCGGGCTTC	2.0	2.0	predicted	ACTB_-_5570191.23-P1P2|ACTB_+_5570130.23-P1P2
NBEAL1	P1P2	1-2	nonessential	NBEAL1_-_203879821.23-P1P2	GGTGAGGGGCGGCTTTGAGT	1.0	1.0	predicted	NBEAL1_-_203879620.23-P1P2	CAGCCAGGCAGACGAGCGGC	2.0	2.0	predicted	NBEAL1_-_203879821.23-P1P2|NBEAL1_-_203879620.23-P1P2
MRPS7	P1P2	1-2	significant	MRPS7_-_73258021.23-P1P2	GAGGTTGCCCGAGGATGGTC	1.0	1.0	empirical	MRPS7_-_73258016.23-P1P2	TCCTCGGGCAACCTTCACTC	2.0	2.0	empirical	MRPS7_-_73258021.23-P1P2|MRPS7_-_73258016.23-P1P2
WDR18	P1P2	1-2	significant	WDR18_-_984344.23-P1P2	GACGCACGTCCGGGGCGGTG	1.0	2.0	empirical	WDR18_-_984406.23-P1P2	CATCGGGGCCGCCGAGTCCC	2.0	5.0	empirical	WDR18_-_984344.23-P1P2|WDR18_-_984406.23-P1P2
NPAT	P1P2	1-2	essential	NPAT_-_108093360.23-P1P2	GCATCTCCTGGTTCCAGTGG	1.0	3.0	essential	NPAT_+_108093330.23-P1P2	GCGCCGCATCTCCTGGTTCC	2.0	1.0	essential	NPAT_-_108093360.23-P1P2|NPAT_+_108093330.23-P1P2
HIST2H2AC	P1P2	1-2	nonessential	HIST2H2AC_+_149859001.23-P1P2	GCACCAAAGTGTCAAATGAA	1.0	1.0	predicted	HIST2H2AC_+_149859102.23-P1P2	TTTTCTTGGGCAACAGGACC	2.0	2.0	predicted	HIST2H2AC_+_149859001.23-P1P2|HIST2H2AC_+_149859102.23-P1P2
UPF3A	P1P2	1-2	nonessential	UPF3A_-_115047112.23-P1P2	GTGCGGCTCGGCGGAGAGTG	1.0	1.0	predicted	UPF3A_-_115047135.23-P1P2	CCTCCTTTTCCGAGCGCATC	2.0	2.0	predicted	UPF3A_-_115047112.23-P1P2|UPF3A_-_115047135.23-P1P2
ALG14	P1P2	1-2	significant	ALG14_+_95538155.23-P1P2	GCGGGCAGTCCAGCCAGGGT	1.0	10.0	empirical	ALG14_+_95538302.23-P1P2	CCTCGATACTTACCGGACCC	2.0	3.0	empirical	ALG14_+_95538155.23-P1P2|ALG14_+_95538302.23-P1P2
PC	P1P2	1-2	nonessential	PC_+_66725818.23-P1P2	GGAGGCAGCAGCGGTAGAGG	1.0	1.0	predicted	PC_+_66725836.23-P1P2	CCACTGACAGAGAACAGCTC	2.0	2.0	predicted	PC_+_66725818.23-P1P2|PC_+_66725836.23-P1P2
QRSL1	P1P2	1-2	significant	QRSL1_+_107077496.23-P1P2	GAGGGGGAAAAAGAGGTCAC	1.0	3.0	empirical	QRSL1_+_107077661.23-P1P2	CGCATCTTGGCCCACCTCGC	2.0	1.0	empirical	QRSL1_+_107077496.23-P1P2|QRSL1_+_107077661.23-P1P2
YARS2	P1P2	1-2	significant	YARS2_-_32908772.23-P1P2	GATTTAGGGTACCAGACCAC	1.0	4.0	empirical	YARS2_+_32908426.23-P1P2	TGGTACGGCCGCTCGGGTCC	2.0	4.0	empirical	YARS2_-_32908772.23-P1P2|YARS2_+_32908426.23-P1P2
CENPT	P1P2	1-2	essential	CENPT_-_67867769.23-P1P2	GTTGTGGTCAGCCATCGTCT	1.0	1.0	essential	CENPT_+_67867777.23-P1P2	TCCTAACCGCCCAGCCAGCC	2.0	5.0	essential	CENPT_-_67867769.23-P1P2|CENPT_+_67867777.23-P1P2
TUBG1	P1P2	1-2	significant	TUBG1_+_40761744.23-P1P2	GTCCCTCGGCATCGCTCCTC	1.0	3.0	empirical	TUBG1_+_40761774.23-P1P2	TACAGTTGGGCCAGTGCGGC	2.0	1.0	empirical	TUBG1_+_40761744.23-P1P2|TUBG1_+_40761774.23-P1P2
NELFCD	P1P2	1-2	significant	NELFCD_-_57556367.23-P1P2	GGCCGTGCCGGGCGCCATCA	1.0	1.0	empirical	NELFCD_-_57556383.23-P1P2	TAGTAGTCCTCGTCCATGAC	2.0	2.0	empirical	NELFCD_-_57556367.23-P1P2|NELFCD_-_57556383.23-P1P2
PFDN6	P1P2	1-2	significant	PFDN6_-_33257405.23-P1P2	GCTGAAGGAAGAACGTGAGT	1.0	1.0	empirical	PFDN6_-_33257410.23-P1P2	AACCTACTCACGTTCTTCCC	2.0	2.0	empirical	PFDN6_-_33257405.23-P1P2|PFDN6_-_33257410.23-P1P2
THAP11	P1P2	1-2	significant	THAP11_+_67876226.23-P1P2	GCCCGCCTGCGCTCGGGAGT	1.0	1.0	empirical	THAP11_-_67876223.23-P1P2	GGGACGCCGCGAAGGACCGC	2.0	2.0	empirical	THAP11_+_67876226.23-P1P2|THAP11_-_67876223.23-P1P2
PPP4R2	P1P2	1-2	significant	PPP4R2_+_73046046.23-P1P2	GACCGGGGGGGGGAAACGAA	1.0	3.0	empirical	PPP4R2_+_73046422.23-P1P2	CCGGCGTCTGGGCTGGGGGC	2.0	7.0	empirical	PPP4R2_+_73046046.23-P1P2|PPP4R2_+_73046422.23-P1P2
SSX4	ENST00000376886.2	1-2	nonessential	SSX4_-_48242891.23-ENST00000376886.2	GTAGGGACAGAACCTTCCCA	1.0	1.0	predicted	SSX4_-_48242899.23-ENST00000376886.2	CCCCGCCTTGGGAAGGTTCC	2.0	2.0	predicted	SSX4_-_48242891.23-ENST00000376886.2|SSX4_-_48242899.23-ENST00000376886.2
XAB2	P1P2	1-2	significant	XAB2_-_7694376.23-P1P2	GGACTCACGAAGACAAGGTC	1.0	3.0	empirical	XAB2_-_7694239.23-P1P2	TAATGGGCCAGAGACCGGAC	2.0	1.0	empirical	XAB2_-_7694376.23-P1P2|XAB2_-_7694239.23-P1P2
USP37	P1P2	1-2	significant	USP37_-_219433009.23-P1P2	GGGATACCGAACCCAAAGGA	1.0	6.0	empirical	USP37_-_219433042.23-P1P2	CTCTCCCTGACTAGGGGTAC	2.0	5.0	empirical	USP37_-_219433009.23-P1P2|USP37_-_219433042.23-P1P2
HINFP	P1P2	1-2	essential	HINFP_-_118992315.23-P1P2	GTCCGGAGATGGTCTGAGGT	1.0	4.0	essential	HINFP_-_118992311.23-P1P2	CAGACCATCTCCGGAGAGGC	2.0	5.0	essential	HINFP_-_118992315.23-P1P2|HINFP_-_118992311.23-P1P2
STX5	P1P2	1-2	nonessential	STX5_+_62599500.23-P1P2	GGTCTTTGGTCGGGTTTCGG	1.0	1.0	predicted	STX5_+_62599448.23-P1P2	CCACTTCCAATCTCACCGGC	2.0	2.0	predicted	STX5_+_62599500.23-P1P2|STX5_+_62599448.23-P1P2
YY1	P1P2	1-2	nonessential	YY1_-_100705185.23-P1P2	GGCCGGGCCCGAGCAGAGTG	1.0	1.0	predicted	YY1_+_100705824.23-P1P2	ATGATCGCTCTGCAGCCGCC	2.0	2.0	predicted	YY1_-_100705185.23-P1P2|YY1_+_100705824.23-P1P2
DCTN4	P1P2	1-2	significant	DCTN4_+_150138508.23-P1P2	GGGGTTCTCTATCTAGTCCA	1.0	4.0	empirical	DCTN4_-_150138465.23-P1P2	CTATTGTAGCGAACTGCGGC	2.0	2.0	empirical	DCTN4_+_150138508.23-P1P2|DCTN4_-_150138465.23-P1P2
KRT8	P2	1-2	nonessential	KRT8_-_53343612.23-P2	GAGGGTTGAGAGCTTTACAG	1.0	1.0	predicted	KRT8_-_53343631.23-P2	TCCATGCTGTCCACTTCCTC	2.0	2.0	predicted	KRT8_-_53343612.23-P2|KRT8_-_53343631.23-P2
RPTOR	P1P2	1-2	significant	RPTOR_+_78519157.23-P1P2	GACCCCAGGTCCCAAGCCAC	1.0	9.0	empirical	RPTOR_+_78519208.23-P1P2	CATTTCCTAGCGGCCCCCAC	2.0	1.0	empirical	RPTOR_+_78519157.23-P1P2|RPTOR_+_78519208.23-P1P2
PPP2R1A	P2	1-2	significant	PPP2R1A_+_52716201.23-P2	GGCAGCCGCACCGAGTCCTA	1.0	1.0	predicted	PPP2R1A_+_52716105.23-P2	CTGCTCTCCCGTCCTTCTGC	2.0	2.0	predicted	PPP2R1A_+_52716201.23-P2|PPP2R1A_+_52716105.23-P2
CHMP3	P1P2	1-2	essential	CHMP3_-_86790522.23-P1P2	GCTTTCAGTTCCCCGCGCCC	1.0	1.0	essential	CHMP3_-_86790451.23-P1P2	AGGAGAAGCCGCCCAAAGAC	2.0	3.0	essential	CHMP3_-_86790522.23-P1P2|CHMP3_-_86790451.23-P1P2
ANAPC4	P1P2	1-2	essential	ANAPC4_+_25378934.23-P1P2	GCCCCACCGGCAGACTAACA	1.0	3.0	essential	ANAPC4_-_25378954.23-P1P2	ACCGGCAGACTAACACGGCC	2.0	1.0	essential	ANAPC4_+_25378934.23-P1P2|ANAPC4_-_25378954.23-P1P2
DNAJC19	P1P2	1-2	essential	DNAJC19_+_180707414.23-P1P2	GGGATGAGCCGTGCTCCCGG	1.0	3.0	essential	DNAJC19_+_180707118.23-P1P2	TACAGGAGTTCCAGGCAAGC	2.0	7.0	essential	DNAJC19_+_180707414.23-P1P2|DNAJC19_+_180707118.23-P1P2
BRF2	P1P2	1-2	significant	BRF2_-_37707367.23-P1P2	GGTCTGCAACAGCAACCGTG	1.0	1.0	empirical	BRF2_-_37707179.23-P1P2	CTACCTTCAGCGACGAGGGC	2.0	4.0	empirical	BRF2_-_37707367.23-P1P2|BRF2_-_37707179.23-P1P2
SF3A3	P1P2	1-2	significant	SF3A3_-_38455652.23-P1P2	GCTCCATCTTCCCTTAGTCG	1.0	2.0	empirical	SF3A3_-_38455462.23-P1P2	TCAGAACCTCCCTGCCTTCC	2.0	6.0	empirical	SF3A3_-_38455652.23-P1P2|SF3A3_-_38455462.23-P1P2
TBCB	P1P2	1-2	essential	TBCB_-_36606452.23-P1P2	GCGCGCTGCAGGCATCCGCA	1.0	6.0	essential	TBCB_-_36606424.23-P1P2	CCTCACACCCGCTCCGCAGC	2.0	3.0	essential	TBCB_-_36606452.23-P1P2|TBCB_-_36606424.23-P1P2
CDAN1	P1P2	1-2	essential	CDAN1_+_43029296.23-P1P2	GCAGAGCGCCCCGACCGGGA	1.0	4.0	essential	CDAN1_-_43029292.23-P1P2	TTTTGGAGTCGCTGCTGCGC	2.0	5.0	essential	CDAN1_+_43029296.23-P1P2|CDAN1_-_43029292.23-P1P2
HNRNPU	P1P2	1-2	significant	HNRNPU_+_245027773.23-P1P2	GCGAACTCGGTGAAAGGAAT	1.0	1.0	empirical	HNRNPU_-_245027750.23-P1P2	CTCTGCAGCACGAACCCATC	2.0	5.0	empirical	HNRNPU_+_245027773.23-P1P2|HNRNPU_-_245027750.23-P1P2
SON	P1	1-2	essential	SON_-_34915392.23-P1	GAGGAGTTGAGAGAACGGAG	1.0	3.0	essential	SON_-_34915373.23-P1	CCTCGCTAGTCCTCCAGGCC	2.0	2.0	essential	SON_-_34915392.23-P1|SON_-_34915373.23-P1
MEX3A	P1P2	1-2	significant	MEX3A_+_156052061.23-P1P2	GCGTCACCCCCGGAGAGGAG	1.0	6.0	empirical	MEX3A_-_156052213.23-P1P2	CTGAGCGCCGCTCCCGGACC	2.0	2.0	empirical	MEX3A_+_156052061.23-P1P2|MEX3A_-_156052213.23-P1P2
NUP35	P1P2	1-2	significant	NUP35_+_183989595.23-P1P2	GCCGCGGTCAGTTCCTCCCA	1.0	5.0	empirical	NUP35_+_183989105.23-P1P2	TTACCCGTGGGGAGCGTTTC	2.0	2.0	empirical	NUP35_+_183989595.23-P1P2|NUP35_+_183989105.23-P1P2
ZFP69B	P1P2	1-2	nonessential	ZFP69B_-_40915813.23-P1P2	GGGAACCCGGCTGCAGCGGT	1.0	1.0	predicted	ZFP69B_-_40915817.23-P1P2	TCCCACCGCTGCAGCCGGGC	2.0	2.0	predicted	ZFP69B_-_40915813.23-P1P2|ZFP69B_-_40915817.23-P1P2
RFC1	P1P2	1-2	significant	RFC1_+_39367944.23-P1P2	GACTTCGCGGGAGAAGTTGT	1.0	3.0	empirical	RFC1_+_39367769.23-P1P2	CCCTGCATACCAGGAGTGCC	2.0	9.0	empirical	RFC1_+_39367944.23-P1P2|RFC1_+_39367769.23-P1P2
ZNF574	P1	1-2	essential	ZNF574_-_42580351.23-P1	GCGGAGCAGGCGAGAGGCGA	1.0	3.0	essential	ZNF574_-_42580345.23-P1	CTCGCCTGCTCCGTAGCCTC	2.0	4.0	essential	ZNF574_-_42580351.23-P1|ZNF574_-_42580345.23-P1
BUB1	P1P2	1-2	significant	BUB1_-_111435363.23-P1P2	GGACAAGCGCCGGGCCTCAG	1.0	9.0	empirical	BUB1_-_111435372.23-P1P2	TGGGTTCCGCTGAGGCCCGC	2.0	10.0	empirical	BUB1_-_111435363.23-P1P2|BUB1_-_111435372.23-P1P2
ADAT2	P1P2	1-2	significant	ADAT2_-_143771826.23-P1P2	GCACTCAGCTACAGAGCCCG	1.0	2.0	empirical	ADAT2_+_143771740.23-P1P2	ACACCGAGCACGCGCCGCTC	2.0	4.0	empirical	ADAT2_-_143771826.23-P1P2|ADAT2_+_143771740.23-P1P2
MRPL18	P1P2	1-2	essential	MRPL18_-_160211509.23-P1P2	GGTCTGGCGTGGAGAGTTTG	1.0	1.0	essential	MRPL18_-_160211527.23-P1P2	TTGGCTGCTGTAGATCCCCC	2.0	4.0	essential	MRPL18_-_160211509.23-P1P2|MRPL18_-_160211527.23-P1P2
SNRPD3	P1P2	1-2	essential	SNRPD3_+_24951964.23-P1P2	GAAGGCGTGAGTCAAGCGAA	1.0	6.0	essential	SNRPD3_+_24951988.23-P1P2	TAGCATCTTTCGCAGCGGAC	2.0	3.0	essential	SNRPD3_+_24951964.23-P1P2|SNRPD3_+_24951988.23-P1P2
PRSS50	P1	1-2	nonessential	PRSS50_-_46854052.23-P1	GCGCCGGCCATGGGTTCTGG	1.0	1.0	predicted	PRSS50_-_46854008.23-P1	CGACGGAGGCTGAGGTCGCC	2.0	2.0	predicted	PRSS50_-_46854052.23-P1|PRSS50_-_46854008.23-P1
UXT	P1P2	1-2	significant	UXT_+_47518485.23-P1P2	GGCCGCGCTTGGGTGTCCCT	1.0	9.0	empirical	UXT_-_47518537.23-P1P2	TTCTTATTGCTGGCGGCCTC	2.0	3.0	empirical	UXT_+_47518485.23-P1P2|UXT_-_47518537.23-P1P2
GPN1	P1P2	1-2	significant	GPN1_-_27852137.23-P1P2	GAAGAGGATTTGGAGGGTAC	1.0	1.0	empirical	GPN1_-_27852111.23-P1P2	TTTCTTCCTGGCCTTCCGCC	2.0	3.0	empirical	GPN1_-_27852137.23-P1P2|GPN1_-_27852111.23-P1P2
MRPL55	P1P2	1-2	essential	MRPL55_-_228296929.23-P1P2	GCCCGGTGGAACTAAGACCA	1.0	3.0	essential	MRPL55_-_228296953.23-P1P2	TGATCTCCTGCGTGGCCTCC	2.0	4.0	essential	MRPL55_-_228296929.23-P1P2|MRPL55_-_228296953.23-P1P2
RANGAP1	P1P2	1-2	significant	RANGAP1_-_41682205.23-P1P2	GCCGCGGCGGATGATGGCGG	1.0	4.0	empirical	RANGAP1_+_41682168.23-P1P2	CCTGCTCTCCGCACCGCGGC	2.0	3.0	empirical	RANGAP1_-_41682205.23-P1P2|RANGAP1_+_41682168.23-P1P2
HBS1L	P1P2	1-2	essential	HBS1L_-_135375685.23-P1P2	GGGCTCTCCCAATCCCGACA	1.0	8.0	essential	HBS1L_+_135375911.23-P1P2	GGAGAACCCCTATGCGCCAC	2.0	3.0	essential	HBS1L_-_135375685.23-P1P2|HBS1L_+_135375911.23-P1P2
DPPA2	P1P2	1-2	nonessential	DPPA2_+_109035295.23-P1P2	GAGCTTAAGAATCGTCCGGA	1.0	1.0	predicted	DPPA2_-_109035169.23-P1P2	ACATCCTCTCCGTCCCCGCC	2.0	2.0	predicted	DPPA2_+_109035295.23-P1P2|DPPA2_-_109035169.23-P1P2
BYSL	P1P2	1-2	significant	BYSL_-_41889282.23-P1P2	GCCCCACGTGCGATCCTTCC	1.0	1.0	empirical	BYSL_-_41889603.23-P1P2	CTGTCTTCCTCGGACCTCAC	2.0	5.0	empirical	BYSL_-_41889282.23-P1P2|BYSL_-_41889603.23-P1P2
ZNF574	P2	1-2	essential	ZNF574_-_42583382.23-P2	GACCACTGAGGTAGTGACTG	1.0	1.0	predicted	ZNF574_-_42583385.23-P2	CCTCAGTCACTACCTCAGTC	2.0	2.0	predicted	ZNF574_-_42583382.23-P2|ZNF574_-_42583385.23-P2
FAU	P1P2	1-2	significant	FAU_-_64889639.23-P1P2	GGCGCGTCAGTACAGACCGT	1.0	6.0	empirical	FAU_-_64889592.23-P1P2	TCTTCGCGGTAGCTGGGACC	2.0	4.0	empirical	FAU_-_64889639.23-P1P2|FAU_-_64889592.23-P1P2
ANLN	P1P2	1-2	significant	ANLN_-_36429483.23-P1P2	GCAGAGGCCGAGTCCGTCAC	1.0	1.0	empirical	ANLN_+_36429487.23-P1P2	AGAGGAGAGGACAGCTGGTC	2.0	4.0	empirical	ANLN_-_36429483.23-P1P2|ANLN_+_36429487.23-P1P2
KPNA6	P1P2	1-2	nonessential	KPNA6_-_32574074.23-P1P2	GCTGGGGGACGGGCTCCCGG	1.0	1.0	predicted	KPNA6_+_32573691.23-P1P2	TTGCCTCCGCCGCCAAGAGC	2.0	2.0	predicted	KPNA6_-_32574074.23-P1P2|KPNA6_+_32573691.23-P1P2
WDR92	P1P2	1-2	significant	WDR92_-_68384628.23-P1P2	GCACCCAGAGCCCCCAAAAA	1.0	2.0	empirical	WDR92_-_68384657.23-P1P2	ATGTTTGGAGTCTGGTTTCC	2.0	4.0	empirical	WDR92_-_68384628.23-P1P2|WDR92_-_68384657.23-P1P2
EIF1	P1P2	1-2	significant	EIF1_+_39845185.23-P1P2	GGGAACGTCGGGAAGCGAGG	1.0	1.0	empirical	EIF1_-_39845517.23-P1P2	CCTGCTCCTTCCGGTCGCGC	2.0	5.0	empirical	EIF1_+_39845185.23-P1P2|EIF1_-_39845517.23-P1P2
SCNM1	P1P2	1-2	nonessential	SCNM1_-_151138590.23-P1P2	GCCTGGAGGAGTGGCGAAAC	1.0	1.0	predicted	SCNM1_+_151138551.23-P1P2	CTCTTGCTACGGTGGCCTGC	2.0	2.0	predicted	SCNM1_-_151138590.23-P1P2|SCNM1_+_151138551.23-P1P2
UBTF	P1P2	1-2	nonessential	UBTF_-_42295646.23-P1P2	GCGTGCTGGCCGGGCAACCC	1.0	1.0	predicted	UBTF_-_42295898.23-P1P2	CGCGTGGCCAGGGGAGGGCC	2.0	2.0	predicted	UBTF_-_42295646.23-P1P2|UBTF_-_42295898.23-P1P2
WAC	P1P2	1-2	significant	WAC_+_28822278.23-P1P2	GGGCAGCGGCGCCAACTACA	1.0	3.0	empirical	WAC_+_28822275.23-P1P2	CCGTGTAGTTGGCGCCGCTC	2.0	1.0	empirical	WAC_+_28822278.23-P1P2|WAC_+_28822275.23-P1P2
NRF1	P1P2	1-2	significant	NRF1_-_129251646.23-P1P2	GTCTCCACGGCGCAGGCCCA	1.0	5.0	empirical	NRF1_-_129251633.23-P1P2	TGGAGACTGCGACCGCGCCC	2.0	3.0	empirical	NRF1_-_129251646.23-P1P2|NRF1_-_129251633.23-P1P2
UBE2M	P1P2	1-2	nonessential	UBE2M_-_59070250.23-P1P2	GGGCAGCAGCGGCTTTAGCG	1.0	1.0	predicted	UBE2M_+_59070110.23-P1P2	CGACCGTGCCGTTTGGCCGC	2.0	2.0	predicted	UBE2M_-_59070250.23-P1P2|UBE2M_+_59070110.23-P1P2
MED28	P1P2	1-2	significant	MED28_-_17616331.23-P1P2	GCAGCCACCCGGTCCCCCTC	1.0	1.0	empirical	MED28_+_17616313.23-P1P2	CCCGGTCCCCCTCAGGCCCC	2.0	2.0	empirical	MED28_-_17616331.23-P1P2|MED28_+_17616313.23-P1P2
ATP6V1B2	P1P2	1-2	essential	ATP6V1B2_-_20054940.23-P1P2	GGGCGCTGCGGGCGATGCGG	1.0	6.0	essential	ATP6V1B2_+_20054954.23-P1P2	CACCCGAGCTACCCGTGCCC	2.0	4.0	essential	ATP6V1B2_-_20054940.23-P1P2|ATP6V1B2_+_20054954.23-P1P2
KIF20A	P1P2	1-2	significant	KIF20A_+_137514914.23-P1P2	GGGGCAAGAGCTGGTAACCC	1.0	10.0	empirical	KIF20A_+_137514862.23-P1P2	AGGAGGAGCAAGTGGCACGC	2.0	6.0	empirical	KIF20A_+_137514914.23-P1P2|KIF20A_+_137514862.23-P1P2
PSMC1	P1P2	1-2	essential	PSMC1_-_90722958.23-P1P2	GCAAGATGGTGAGTGACTAA	1.0	4.0	essential	PSMC1_-_90723020.23-P1P2	CTTTCTCTCGCCTCAGGCTC	2.0	2.0	essential	PSMC1_-_90722958.23-P1P2|PSMC1_-_90723020.23-P1P2
FOXD4	ENST00000382500.2	1-2	nonessential	FOXD4_+_118156.23-ENST00000382500.2	GCCGCCGGGGCCAGGTGATC	1.0	1.0	predicted	FOXD4_-_118168.23-ENST00000382500.2	GGTGATCCGGCCGCCACATC	2.0	2.0	predicted	FOXD4_+_118156.23-ENST00000382500.2|FOXD4_-_118168.23-ENST00000382500.2
NBPF15	P1P2	1-2	nonessential	NBPF15_-_148556006.23-P1P2	GGCTCTCCTGACGCGCCGGG	1.0	1.0	predicted	NBPF15_+_148556443.23-P1P2	TCCTTGGGCGCTGGGGAAGC	2.0	2.0	predicted	NBPF15_-_148556006.23-P1P2|NBPF15_+_148556443.23-P1P2
TSEN54	P1P2	1-2	significant	TSEN54_+_73512666.23-P1P2	GCGCCCCGCGGGAACCTCCA	1.0	1.0	empirical	TSEN54_-_73511850.23-P1P2	TTGGGTCTAAGTCCAGAGCC	2.0	3.0	empirical	TSEN54_+_73512666.23-P1P2|TSEN54_-_73511850.23-P1P2
COX10	P1P2	1-2	essential	COX10_-_13972882.23-P1P2	GCAGCGTCCCGTGAGGAGAG	1.0	1.0	essential	COX10_-_13972875.23-P1P2	CACGGGACGCTGGGCGCCGC	2.0	2.0	essential	COX10_-_13972882.23-P1P2|COX10_-_13972875.23-P1P2
ATP6V1C1	P1P2	1-2	essential	ATP6V1C1_-_104033344.23-P1P2	GTTGGGTAGAGGAAGCCGTG	1.0	4.0	essential	ATP6V1C1_-_104033365.23-P1P2	TCCCGACCTAAGCTCCGGCC	2.0	1.0	essential	ATP6V1C1_-_104033344.23-P1P2|ATP6V1C1_-_104033365.23-P1P2
DCTN2	P1P2	1-2	significant	DCTN2_-_57940946.23-P1P2	GGGGTCCCGGGCTAAGGCGG	1.0	2.0	empirical	DCTN2_-_57940910.23-P1P2	TACCCGAACACCGGCCCCGC	2.0	1.0	empirical	DCTN2_-_57940946.23-P1P2|DCTN2_-_57940910.23-P1P2
RARS	P1P2	1-2	essential	RARS_-_167913515.23-P1P2	GGATGGGAGGATGGACGTAC	1.0	3.0	essential	RARS_-_167913535.23-P1P2	CGCGGAGCACTCAGACACCC	2.0	7.0	essential	RARS_-_167913515.23-P1P2|RARS_-_167913535.23-P1P2
KAT5	P1P2	1-2	significant	KAT5_+_65479809.23-P1P2	GGCCAGGGTCGGCTACTGGG	1.0	1.0	empirical	KAT5_-_65480114.23-P1P2	CCTTCAGTCACAAGTGCCAC	2.0	2.0	empirical	KAT5_+_65479809.23-P1P2|KAT5_-_65480114.23-P1P2
KRR1	P1P2	1-2	essential	KRR1_+_75905342.23-P1P2	GCGCTGGAGCGGCCAGAAAA	1.0	3.0	essential	KRR1_+_75904938.23-P1P2	ACCTCACCCTATTCCTCATC	2.0	9.0	essential	KRR1_+_75905342.23-P1P2|KRR1_+_75904938.23-P1P2
WDR33	P1P2	1-2	essential	WDR33_+_128568707.23-P1P2	GGGCCCATAGGGGAAGATGG	1.0	3.0	essential	WDR33_-_128568762.23-P1P2	GTGCGTGATGACCCCAGAGC	2.0	5.0	essential	WDR33_+_128568707.23-P1P2|WDR33_-_128568762.23-P1P2
MED4	P1P2	1-2	significant	MED4_+_48669194.23-P1P2	GAAATGGCTGCGTCTTCGAG	1.0	4.0	empirical	MED4_+_48669127.23-P1P2	CTCTCGTGTGCTGTTACCAC	2.0	1.0	empirical	MED4_+_48669194.23-P1P2|MED4_+_48669127.23-P1P2
PCBP1	P1P2	1-2	significant	PCBP1_+_70314830.23-P1P2	GGGGAGTTGGGCTCGTTACG	1.0	1.0	empirical	PCBP1_+_70314626.23-P1P2	GAGTCGCCACCGCCGCGCCC	2.0	2.0	empirical	PCBP1_+_70314830.23-P1P2|PCBP1_+_70314626.23-P1P2
AHCY	P1P2	1-2	significant	AHCY_-_32891145.23-P1P2	GCTGGGAACAGGAACTGGGC	1.0	1.0	empirical	AHCY_-_32890950.23-P1P2	CTGGAATCGCAGCCTCGGCC	2.0	5.0	empirical	AHCY_-_32891145.23-P1P2|AHCY_-_32890950.23-P1P2
RPS3A	P1P2	1-2	significant	RPS3A_-_152021035.23-P1P2	GGAGGGTCGGTGTTGAGTAG	1.0	6.0	empirical	RPS3A_+_152021229.23-P1P2	TTGCTTGGTCCCGCTGGAAC	2.0	7.0	empirical	RPS3A_-_152021035.23-P1P2|RPS3A_+_152021229.23-P1P2
C1orf109	P2	1-2	nonessential	C1orf109_+_38157864.23-P2	GGGAGGGCTGGGGGCCTACT	1.0	1.0	predicted	C1orf109_-_38157872.23-P2	ACTAGGTCAGGTCGGCTGTC	2.0	2.0	predicted	C1orf109_+_38157864.23-P2|C1orf109_-_38157872.23-P2
PFN1	P1P2	1-2	significant	PFN1_+_4851797.23-P1P2	GAGCGGAGCCGCGGTCCGGA	1.0	1.0	empirical	PFN1_+_4851832.23-P1P2	TCGCACCGCCACTTCCTGCC	2.0	3.0	empirical	PFN1_+_4851797.23-P1P2|PFN1_+_4851832.23-P1P2
RRP9	P1P2	1-2	significant	RRP9_+_51975867.23-P1P2	GGGCAGCATGTCGGCAACAG	1.0	1.0	empirical	RRP9_+_51975876.23-P1P2	ACATGCTGCCCACCAGGCGC	2.0	5.0	empirical	RRP9_+_51975867.23-P1P2|RRP9_+_51975876.23-P1P2
PRMT5	P2	1-2	essential	PRMT5_-_23395618.23-P2	GAAGCCAGTCTGAGACAGAG	1.0	1.0	predicted	PRMT5_+_23395600.23-P2	GTCTGAGACAGAGGGGAAGC	2.0	2.0	predicted	PRMT5_-_23395618.23-P2|PRMT5_+_23395600.23-P2
QARS	P1P2	1-2	essential	QARS_-_49142149.23-P1P2	GAGGCTAGTGAAGAGCGACA	1.0	2.0	essential	QARS_-_49142355.23-P1P2	CCGGAAAGGCCGGTTTGTCC	2.0	1.0	essential	QARS_-_49142149.23-P1P2|QARS_-_49142355.23-P1P2
RMI1	P1P2	1-2	significant	RMI1_+_86595732.23-P1P2	GGTAAGGACAGGAACCGCCG	1.0	5.0	empirical	RMI1_+_86595743.23-P1P2	GTCCTTACAGTTGCGCTGCC	2.0	2.0	empirical	RMI1_+_86595732.23-P1P2|RMI1_+_86595743.23-P1P2
SUPT5H	P1P2	1-2	essential	SUPT5H_-_39936298.23-P1P2	GGTAAGTGCGTGTGCAGAGG	1.0	4.0	essential	SUPT5H_-_39936257.23-P1P2	TCGGTACCAGCTGCTGTTCC	2.0	6.0	essential	SUPT5H_-_39936298.23-P1P2|SUPT5H_-_39936257.23-P1P2
MRPS14	P1P2	1-2	essential	MRPS14_-_174992444.23-P1P2	GCAGAGCCGTGGGGGACCCG	1.0	2.0	essential	MRPS14_+_174992540.23-P1P2	TGTTGTCCGCTACAAACTAC	2.0	4.0	essential	MRPS14_-_174992444.23-P1P2|MRPS14_+_174992540.23-P1P2
FOLR3	P1	1-2	significant	FOLR3_-_71825990.23-P1	GGGGTGAGTTGATGGTATCT	1.0	1.0	predicted	FOLR3_-_71825982.23-P1	TCAACTCACCCAGCTTTCTC	2.0	2.0	predicted	FOLR3_-_71825990.23-P1|FOLR3_-_71825982.23-P1
POLR2E	P1	1-2	significant	POLR2E_+_1095301.23-P1	GGAGGCTGCCATGGACGACG	1.0	1.0	empirical	POLR2E_+_1095334.23-P1	CTCGCACCCCTTCTCCGCGC	2.0	4.0	empirical	POLR2E_+_1095301.23-P1|POLR2E_+_1095334.23-P1
PKM	P2	1-2	significant	PKM_+_72500912.23-P2	GCCCAGCGCAGCTCTCCGAA	1.0	1.0	predicted	PKM_-_72500954.23-P2	CGTTGTCCCTGCTCCAGTCC	2.0	2.0	predicted	PKM_+_72500912.23-P2|PKM_-_72500954.23-P2
RNF8	P1P2	1-2	significant	RNF8_-_37322257.23-P1P2	GCGAGCGGCTGAAGGGTCTG	1.0	5.0	empirical	RNF8_-_37322005.23-P1P2	CCGCAGGCACCAGCTCCGGC	2.0	2.0	empirical	RNF8_-_37322257.23-P1P2|RNF8_-_37322005.23-P1P2
POT1	P1P2	1-2	significant	POT1_+_124569865.23-P1P2	GGCCCGCCTAAACTCTTCCT	1.0	2.0	empirical	POT1_-_124569870.23-P1P2	AGGGTTCTTTCTAGAGTACC	2.0	1.0	empirical	POT1_+_124569865.23-P1P2|POT1_-_124569870.23-P1P2
TELO2	P1P2	1-2	significant	TELO2_-_1543415.23-P1P2	GATTCGCGCTGAGAGGCCCG	1.0	7.0	empirical	TELO2_-_1543611.23-P1P2	GACCTGGACCCGGCTCCCGC	2.0	5.0	empirical	TELO2_-_1543415.23-P1P2|TELO2_-_1543611.23-P1P2
VPS51	P1P2	1-2	significant	VPS51_-_64863725.23-P1P2	GTGGGCTGCAGTTGGAACGA	1.0	2.0	empirical	VPS51_-_64863728.23-P1P2	CCATCGTTCCAACTGCAGCC	2.0	1.0	empirical	VPS51_-_64863725.23-P1P2|VPS51_-_64863728.23-P1P2
LPA	P1P2	1-2	nonessential	LPA_-_161084950.23-P1P2	GGCCAGACTGGCCATCATGT	1.0	1.0	predicted	LPA_+_161084930.23-P1P2	GACTGGCCATCATGTAGGCC	2.0	2.0	predicted	LPA_-_161084950.23-P1P2|LPA_+_161084930.23-P1P2
MED8	P1P2	1-2	significant	MED8_+_43855428.23-P1P2	GGCCTCGGCCGCCGCAATGC	1.0	5.0	empirical	MED8_+_43855245.23-P1P2	CCACCTCTAATCGCCGCCGC	2.0	4.0	empirical	MED8_+_43855428.23-P1P2|MED8_+_43855245.23-P1P2
PSMD11	P1P2	1-2	significant	PSMD11_-_30771536.23-P1P2	GGCCGGGGACGGTGTGAGAG	1.0	2.0	empirical	PSMD11_-_30771547.23-P1P2	CCATCTTACCGCTCTCACAC	2.0	3.0	empirical	PSMD11_-_30771536.23-P1P2|PSMD11_-_30771547.23-P1P2
SF3A2	P2	1-2	essential	SF3A2_+_2243491.23-P2	GCTGCCGGAGGCGCTCCCTG	1.0	1.0	essential	SF3A2_+_2243552.23-P2	CCGTGCAGCTGCCTGTGGTC	2.0	2.0	essential	SF3A2_+_2243491.23-P2|SF3A2_+_2243552.23-P2
TCOF1	P1P2	1-2	significant	TCOF1_-_149737329.23-P1P2	GTATGGCCGAGGCCAGGAAG	1.0	3.0	empirical	TCOF1_+_149737342.23-P1P2	CTGATCTACCACCATCTGCC	2.0	4.0	empirical	TCOF1_-_149737329.23-P1P2|TCOF1_+_149737342.23-P1P2
PPP1R7	P1P2	1-2	nonessential	PPP1R7_-_242089926.23-P1P2	GCCAACATGGCGGCGGAACG	1.0	1.0	predicted	PPP1R7_+_242089597.23-P1P2	AGACGTCCACTCCGTCTGCC	2.0	2.0	predicted	PPP1R7_-_242089926.23-P1P2|PPP1R7_+_242089597.23-P1P2
RPS29	P1	1-2	significant	RPS29_-_50052902.23-P1	GGGCACCAGCGACTCCCAGT	1.0	3.0	empirical	RPS29_-_50052869.23-P1	GTACTGTGGCTTGGGAGTCC	2.0	2.0	empirical	RPS29_-_50052902.23-P1|RPS29_-_50052869.23-P1
ERVW-1	ENST00000603053.1	1-2	nonessential	ERVW-1_-_92107250.23-ENST00000603053.1	GACAAAGGGAAGGGACCCAA	1.0	1.0	predicted	ERVW-1_+_92106817.23-ENST00000603053.1	CGTATTCTCTGACCTGGAGC	2.0	2.0	predicted	ERVW-1_-_92107250.23-ENST00000603053.1|ERVW-1_+_92106817.23-ENST00000603053.1
GRB2	P2	1-2	significant	GRB2_-_73389861.23-P2	GGCCACCCTGAAGCAGGAGA	1.0	1.0	predicted	GRB2_+_73389905.23-P2	ATCGGCCTGCTGTCCCAGCC	2.0	2.0	predicted	GRB2_-_73389861.23-P2|GRB2_+_73389905.23-P2
ARGFX	P1P2	1-2	nonessential	ARGFX_-_121286824.23-P1P2	GAGAGAGAGACACACCACGT	1.0	1.0	predicted	ARGFX_-_121286860.23-P1P2	GTCACGAATCCCCTTAGAGC	2.0	2.0	predicted	ARGFX_-_121286824.23-P1P2|ARGFX_-_121286860.23-P1P2
CDC73	P1P2	1-2	significant	CDC73_-_193091272.23-P1P2	GGCGAGGCGACAAGAGAAGA	1.0	4.0	empirical	CDC73_+_193091167.23-P1P2	CTGCTGCTGTCGTAGGCGAC	2.0	3.0	empirical	CDC73_-_193091272.23-P1P2|CDC73_+_193091167.23-P1P2
PGAM1	P1P2	1-2	significant	PGAM1_-_99186020.23-P1P2	GACGGGGCGGGCTGCTACTC	1.0	1.0	empirical	PGAM1_-_99185976.23-P1P2	CTCAGTCCGGCTCCCGCGCC	2.0	4.0	empirical	PGAM1_-_99186020.23-P1P2|PGAM1_-_99185976.23-P1P2
CNOT1	P1P2	1-2	essential	CNOT1_+_58663696.23-P1P2	GGCGGAGTTAACCGAAGAGG	1.0	3.0	essential	CNOT1_-_58663535.23-P1P2	CTGGAAGCGTTTCCCGGAGC	2.0	1.0	essential	CNOT1_+_58663696.23-P1P2|CNOT1_-_58663535.23-P1P2
EIF6	P1P2	1-2	essential	EIF6_+_33872338.23-P1P2	GGACGGAGGCCGGGATACTT	1.0	3.0	essential	EIF6_+_33872401.23-P1P2	CTCCGTCCTCGGGTCCCGCC	2.0	2.0	essential	EIF6_+_33872338.23-P1P2|EIF6_+_33872401.23-P1P2
RPS13	P1P2	1-2	essential	RPS13_+_17099232.23-P1P2	GCGTGTTGGGTGGCTTCCTG	1.0	2.0	essential	RPS13_+_17099153.23-P1P2	CGAGCTCACCCGGGAGCATC	2.0	1.0	essential	RPS13_+_17099232.23-P1P2|RPS13_+_17099153.23-P1P2
ATP6AP2	P1P2	1-2	significant	ATP6AP2_+_40440259.23-P1P2	GGAACGGGCCGGCGGGACAC	1.0	3.0	empirical	ATP6AP2_+_40440237.23-P1P2	CCTCACGCTGCGGCTGTCGC	2.0	1.0	empirical	ATP6AP2_+_40440259.23-P1P2|ATP6AP2_+_40440237.23-P1P2
CS	P1P2	1-2	significant	CS_-_56694134.23-P1P2	GGAAAGAGTAGACGAACCGG	1.0	1.0	empirical	CS_-_56693735.23-P1P2	CCCTCGGCCCGCAGTCCAGC	2.0	8.0	empirical	CS_-_56694134.23-P1P2|CS_-_56693735.23-P1P2
TBP	P1P2	1-2	significant	TBP_-_170863481.23-P1P2	GAGGTCGGGCAGGTTCGCTG	1.0	4.0	empirical	TBP_-_170863462.23-P1P2	CACTGAACCCCTGGCGCGCC	2.0	5.0	empirical	TBP_-_170863481.23-P1P2|TBP_-_170863462.23-P1P2
GTF3C4	P1P2	1-2	significant	GTF3C4_+_135545609.23-P1P2	GGCCGGATCTCGCTTCTCAG	1.0	4.0	empirical	GTF3C4_-_135545497.23-P1P2	ACCCGCCCGGTGCCGCCGTC	2.0	3.0	empirical	GTF3C4_+_135545609.23-P1P2|GTF3C4_-_135545497.23-P1P2
NOC3L	P1P2	1-2	essential	NOC3L_-_96122495.23-P1P2	GACCACCGCCCCCTAGACAC	1.0	6.0	essential	NOC3L_+_96122658.23-P1P2	GGGAATGACACACGTGCCGC	2.0	7.0	essential	NOC3L_-_96122495.23-P1P2|NOC3L_+_96122658.23-P1P2
DCUN1D5	P1P2	1-2	significant	DCUN1D5_-_102962856.23-P1P2	GTCACCGGGAGGAGATAACG	1.0	5.0	empirical	DCUN1D5_-_102962827.23-P1P2	CAGTGTCCACCGGCGAGGAC	2.0	4.0	empirical	DCUN1D5_-_102962856.23-P1P2|DCUN1D5_-_102962827.23-P1P2
DMAP1	P1P2	1-2	essential	DMAP1_-_44679204.23-P1P2	GCAGCTGCCGGACCCAGGTG	1.0	3.0	essential	DMAP1_-_44679254.23-P1P2	CTTGGATGTTCCTAACGGCC	2.0	8.0	essential	DMAP1_-_44679204.23-P1P2|DMAP1_-_44679254.23-P1P2
ZNF317	P1P2	1-2	nonessential	ZNF317_+_9251231.23-P1P2	GATCGGGGGAGCGGAGGTGA	1.0	1.0	predicted	ZNF317_-_9251162.23-P1P2	ACAGGCCGAAAGAATTCGCC	2.0	2.0	predicted	ZNF317_+_9251231.23-P1P2|ZNF317_-_9251162.23-P1P2
COX7C	P1P2	1-2	significant	COX7C_+_85913816.23-P1P2	GATGAGGACAGATGAAATGG	1.0	1.0	empirical	COX7C_+_85914019.23-P1P2	CCGGGCTGTGGCGTGGGAGC	2.0	8.0	empirical	COX7C_+_85913816.23-P1P2|COX7C_+_85914019.23-P1P2
NDUFS5	P2	1-2	significant	NDUFS5_-_39494549.23-P2	GCATGGAATCGGTTATACTC	1.0	1.0	predicted	NDUFS5_-_39494612.23-P2	TTTTCTGCCGAAGCAAACAC	3.0	3.0	predicted	NDUFS5_-_39494549.23-P2|NDUFS5_-_39494612.23-P2
LST1	P2	1-2	nonessential	LST1_+_31555054.23-P2	GTAGGTCAGGGATCAGGGAC	1.0	1.0	predicted	LST1_+_31555066.23-P2	TGACCTAATGTTATCGCGGC	2.0	2.0	predicted	LST1_+_31555054.23-P2|LST1_+_31555066.23-P2
SMU1	P1P2	1-2	essential	SMU1_+_33076608.23-P1P2	GGCCTGCTCCCGGAGAGATA	1.0	3.0	essential	SMU1_-_33076622.23-P1P2	GGAGAGATACGGCTATGTCC	2.0	4.0	essential	SMU1_+_33076608.23-P1P2|SMU1_-_33076622.23-P1P2
CHERP	P1P2	1-2	essential	CHERP_+_16653219.23-P1P2	GGCGCTGGTGGTCGATCGTG	1.0	1.0	essential	CHERP_-_16653216.23-P1P2	GAGGACGTTCCCCGCGGCCC	2.0	5.0	essential	CHERP_+_16653219.23-P1P2|CHERP_-_16653216.23-P1P2
DDX19B	P1	1-2	nonessential	DDX19B_+_70333136.23-P1	GGGATGGCACGAGGGATCGT	1.0	1.0	predicted	DDX19B_+_70333144.23-P1	TCGTGCCATCCCTCGAATCC	2.0	2.0	predicted	DDX19B_+_70333136.23-P1|DDX19B_+_70333144.23-P1
CDC5L	P1P2	1-2	essential	CDC5L_-_44355475.23-P1P2	GAGGTCGCGCTTGGAGGAAG	1.0	3.0	essential	CDC5L_+_44355934.23-P1P2	GAGTTGGTCCCCCGGGGCAC	2.0	8.0	essential	CDC5L_-_44355475.23-P1P2|CDC5L_+_44355934.23-P1P2
METAP1	P1P2	1-2	significant	METAP1_+_99916870.23-P1P2	GCTGGAAGAGCGCCTCACCG	1.0	1.0	empirical	METAP1_-_99916941.23-P1P2	TCTGTCTCGCACACCCGCGC	2.0	3.0	empirical	METAP1_+_99916870.23-P1P2|METAP1_-_99916941.23-P1P2
OR4N2	ENST00000315947.1	1-2	nonessential	OR4N2_+_20296017.23-ENST00000315947.1	GCATTGCATAGCAGGTTCTA	2.0	2.0	predicted	OR4N2_+_20296003.23-ENST00000315947.1	ACTGTCATGAACCCTAGAAC	3.0	3.0	predicted	OR4N2_+_20296017.23-ENST00000315947.1|OR4N2_+_20296003.23-ENST00000315947.1
MED18	P1P2	1-2	essential	MED18_-_28655598.23-P1P2	GCTTCCCGGGCTCGGGTAAC	1.0	2.0	essential	MED18_-_28655606.23-P1P2	GCACTCCGGTTACCCGAGCC	2.0	5.0	essential	MED18_-_28655598.23-P1P2|MED18_-_28655606.23-P1P2
POLR2E	P2	1-2	significant	POLR2E_+_1089911.23-P2	GATCCAGGCGGGGGACCCTG	1.0	1.0	predicted	POLR2E_+_1089885.23-P2	ACGCTTTATCCCAAAGTAGC	2.0	2.0	predicted	POLR2E_+_1089911.23-P2|POLR2E_+_1089885.23-P2
MAGOH	P1P2	1-2	significant	MAGOH_+_53704169.23-P1P2	GCAGTGTCGGGCGCAGACGG	1.0	2.0	empirical	MAGOH_+_53703946.23-P1P2	CACAGATTTCCGACCCTCGC	2.0	3.0	empirical	MAGOH_+_53704169.23-P1P2|MAGOH_+_53703946.23-P1P2
MOB4	P1P2	1-2	significant	MOB4_-_198380805.23-P1P2	GACTCCAGCCGCCTAGACGC	1.0	6.0	empirical	MOB4_+_198380762.23-P1P2	TCCCTACATCCGGGTACCGC	2.0	2.0	empirical	MOB4_-_198380805.23-P1P2|MOB4_+_198380762.23-P1P2
CDC20	P1P2	1-2	essential	CDC20_-_43824668.23-P1P2	GAAGCCGGTCGGAACTGCTC	1.0	5.0	essential	CDC20_-_43824671.23-P1P2	CCGGAGCAGTTCCGACCGGC	2.0	1.0	essential	CDC20_-_43824668.23-P1P2|CDC20_-_43824671.23-P1P2
USP10	P1P2	1-2	nonessential	USP10_-_84733673.23-P1P2	GGTGAGCAGCCGGAGGATCG	1.0	1.0	predicted	USP10_+_84733660.23-P1P2	GAGGATCGCGGAGTCCCAAC	2.0	2.0	predicted	USP10_-_84733673.23-P1P2|USP10_+_84733660.23-P1P2
TAF6	P1P2	1-2	significant	TAF6_-_99716931.23-P1P2	GGGGAGCAGGAAAACTCTAG	1.0	3.0	empirical	TAF6_+_99716935.23-P1P2	AGACGCTGCTCACCCGGCGC	2.0	4.0	empirical	TAF6_-_99716931.23-P1P2|TAF6_+_99716935.23-P1P2
NUP107	P1P2	1-2	essential	NUP107_-_69080796.23-P1P2	GGAGCGGGAAGGCTAAAACG	1.0	1.0	essential	NUP107_-_69080973.23-P1P2	TAGGGGAAGCACCCGGGACC	2.0	9.0	essential	NUP107_-_69080796.23-P1P2|NUP107_-_69080973.23-P1P2
ATP6V1H	P1P2	1-2	significant	ATP6V1H_-_54755805.23-P1P2	GTGAGGGCCGCACAGGTAGA	1.0	3.0	empirical	ATP6V1H_-_54755777.23-P1P2	TGGTGCGGGACCCGCTTCAC	2.0	2.0	empirical	ATP6V1H_-_54755805.23-P1P2|ATP6V1H_-_54755777.23-P1P2
ZNF559	P1P2	1-2	significant	ZNF559_-_9434970.23-P1P2	GCCACGCGAGAGTAGAAGGG	1.0	6.0	empirical	ZNF559_-_9435103.23-P1P2	CCTCGACCCCTGAGGACAGC	2.0	4.0	empirical	ZNF559_-_9434970.23-P1P2|ZNF559_-_9435103.23-P1P2
PIAS4	P1P2	1-2	essential	PIAS4_+_4008092.23-P1P2	GGGACGGTGCCTCAACCGGG	1.0	8.0	essential	PIAS4_+_4007982.23-P1P2	CACCCAGGTCTTCGCGCCGC	2.0	5.0	essential	PIAS4_+_4008092.23-P1P2|PIAS4_+_4007982.23-P1P2
MRPS5	P1P2	1-2	essential	MRPS5_+_95787523.23-P1P2	GGACTCCAGCATGGCGACCG	1.0	3.0	essential	MRPS5_-_95787528.23-P1P2	CGGTGCGCGCTGTGGGCTGC	2.0	4.0	essential	MRPS5_+_95787523.23-P1P2|MRPS5_-_95787528.23-P1P2
PRPF40A	P1P2	1-2	significant	PRPF40A_+_153573726.23-P1P2	GCCTCGGTAAGGGATCAGTG	1.0	2.0	empirical	PRPF40A_+_153573902.23-P1P2	CATCGTCGGGCTCAGACTGC	2.0	4.0	empirical	PRPF40A_+_153573726.23-P1P2|PRPF40A_+_153573902.23-P1P2
MRPS18A	P1P2	1-2	significant	MRPS18A_+_43655465.23-P1P2	GCTGTGGGCGGCTTCTCCGT	1.0	1.0	empirical	MRPS18A_-_43655340.23-P1P2	CGGTGCGCTCCTTCCTACCC	2.0	2.0	empirical	MRPS18A_+_43655465.23-P1P2|MRPS18A_-_43655340.23-P1P2
DICER1	P1P2	1-2	significant	DICER1_+_95623669.23-P1P2	GGGCGAGCGCGAGGAAATGG	1.0	4.0	empirical	DICER1_+_95623701.23-P1P2	CGCTGTCAGGTTACTCCATC	2.0	1.0	empirical	DICER1_+_95623669.23-P1P2|DICER1_+_95623701.23-P1P2
CTDP1	P1P2	1-2	significant	CTDP1_+_77439863.23-P1P2	GTACCGCGGCGACACAACCC	1.0	3.0	empirical	CTDP1_+_77439877.23-P1P2	CGGTAGGCGCTGCGCTCTGC	2.0	4.0	empirical	CTDP1_+_77439863.23-P1P2|CTDP1_+_77439877.23-P1P2
CDK11A	P1P2	1-2	nonessential	CDK11A_+_1655695.23-P1P2	GACCGGCCGCGGCCCCGTAG	1.0	1.0	predicted	CDK11A_+_1655752.23-P1P2	GAAGTATCCTCACTTCCTGC	2.0	2.0	predicted	CDK11A_+_1655695.23-P1P2|CDK11A_+_1655752.23-P1P2
DHODH	P1	1-2	essential	DHODH_-_72042709.23-P1	GGTCCCGCGAGTGAGCAGTG	1.0	1.0	essential	DHODH_-_72042714.23-P1	ATCCACACTGCTCACTCGCC	2.0	3.0	essential	DHODH_-_72042709.23-P1|DHODH_-_72042714.23-P1
HMGA1	P1P2	1-2	nonessential	HMGA1_-_34204692.23-P1P2	GGTGCTGCGCTCCTCTAATT	1.0	1.0	predicted	HMGA1_+_34204957.23-P1P2	CTGCTCTCTCCCGGTTTCAC	2.0	2.0	predicted	HMGA1_-_34204692.23-P1P2|HMGA1_+_34204957.23-P1P2
RNPS1	P1P2	1-2	nonessential	RNPS1_+_2318108.23-P1P2	GCTTGACTCTGACGTCAGAG	1.0	1.0	predicted	RNPS1_+_2318045.23-P1P2	AACTTACATCTTCCCGCCGC	2.0	2.0	predicted	RNPS1_+_2318108.23-P1P2|RNPS1_+_2318045.23-P1P2
NAPA	P1P2	1-2	significant	NAPA_+_48018236.23-P1P2	GCCGCGGCTGAGTCTTCCCA	1.0	2.0	empirical	NAPA_-_48018280.23-P1P2	ATCTGTGTTCCGCGGCCCGC	2.0	1.0	empirical	NAPA_+_48018236.23-P1P2|NAPA_-_48018280.23-P1P2
UFM1	P1P2	1-2	significant	UFM1_+_38924011.23-P1P2	GACACACGACAACTCCGCGG	1.0	3.0	empirical	UFM1_+_38924080.23-P1P2	TAATTCCTGGTCCAGCTGCC	2.0	7.0	empirical	UFM1_+_38924011.23-P1P2|UFM1_+_38924080.23-P1P2
TUT1	P2	1-2	significant	TUT1_-_62344700.23-P2	GCAGCGGAGGGTGTACACGA	1.0	1.0	predicted	TUT1_-_62344688.23-P2	TCCGCTGCTGGGCTCAGGGC	2.0	2.0	predicted	TUT1_-_62344700.23-P2|TUT1_-_62344688.23-P2
NOP58	P1P2	1-2	essential	NOP58_-_203130504.23-P1P2	GTCCTAGTTCCAGTACAGCG	1.0	2.0	essential	NOP58_-_203130508.23-P1P2	TCCACGCTGTACTGGAACTC	2.0	3.0	essential	NOP58_-_203130504.23-P1P2|NOP58_-_203130508.23-P1P2
ABCB10	P1P2	1-2	significant	ABCB10_+_229694285.23-P1P2	GCGCGGCCAGCCGCGTTCCC	1.0	2.0	empirical	ABCB10_-_229694297.23-P1P2	CGTTCCCGGGTCCCTATCGC	2.0	1.0	empirical	ABCB10_+_229694285.23-P1P2|ABCB10_-_229694297.23-P1P2
PPIL4	P1P2	1-2	significant	PPIL4_+_149867112.23-P1P2	GTTCTACTGGAGACCACTTT	1.0	2.0	empirical	PPIL4_+_149867157.23-P1P2	CTACAAACCCCGGGAGGAGC	2.0	1.0	empirical	PPIL4_+_149867112.23-P1P2|PPIL4_+_149867157.23-P1P2
DDX54	P1	1-2	significant	DDX54_+_113623252.23-P1	GTCCCAGCGCGCGGCCCGAA	1.0	1.0	empirical	DDX54_-_113623260.23-P1	GAATGGCGGCCGACAAGGGC	2.0	2.0	empirical	DDX54_+_113623252.23-P1|DDX54_-_113623260.23-P1
ALG1	P1P2	1-2	significant	ALG1_+_5122098.23-P1P2	GGGTTAGAACCGAGGATCAA	1.0	2.0	empirical	ALG1_+_5121857.23-P1P2	CATGCTTGGTCCTGCTGGCC	2.0	4.0	empirical	ALG1_+_5122098.23-P1P2|ALG1_+_5121857.23-P1P2
ADAT3	P2	1-2	significant	ADAT3_+_1907955.23-P2	GGGCCCGCCGCGCCCTTGGA	1.0	5.0	empirical	ADAT3_+_1908004.23-P2	CTCTGGGTCGTTTGTTTTTC	2.0	4.0	empirical	ADAT3_+_1907955.23-P2|ADAT3_+_1908004.23-P2
POLR3B	P1P2	1-2	essential	POLR3B_-_106751759.23-P1P2	GAGGCACGCAGGGAGCGTCA	1.0	6.0	essential	POLR3B_-_106751729.23-P1P2	CTACAGTCGGGATCGGCGCC	2.0	1.0	essential	POLR3B_-_106751759.23-P1P2|POLR3B_-_106751729.23-P1P2
GTF2A1	P1P2	1-2	significant	GTF2A1_+_81687215.23-P1P2	GGAGAAGCGGGCGGACCGGA	1.0	1.0	empirical	GTF2A1_+_81687253.23-P1P2	ACAAGCTGCGCGAGCCACCC	2.0	2.0	empirical	GTF2A1_+_81687215.23-P1P2|GTF2A1_+_81687253.23-P1P2
VBP1	P1P2	1-2	significant	VBP1_-_154444784.23-P1P2	GCGGCCGTTAAGGACAGTTG	1.0	1.0	empirical	VBP1_-_154444762.23-P1P2	TCTTGGGGATGCGAGCGCGC	2.0	3.0	empirical	VBP1_-_154444784.23-P1P2|VBP1_-_154444762.23-P1P2
PRRC2A	P1P2	1-2	significant	PRRC2A_+_31588595.23-P1P2	GATCCGGGACCCGGGCCTAG	1.0	5.0	empirical	PRRC2A_-_31588521.23-P1P2	TCGCTCACTCCGCGGCTGAC	2.0	3.0	empirical	PRRC2A_+_31588595.23-P1P2|PRRC2A_-_31588521.23-P1P2
PELP1	P1P2	1-2	significant	PELP1_-_4607218.23-P1P2	GATGAGCCCGGGCAAATGTG	1.0	3.0	empirical	PELP1_+_4607399.23-P1P2	CCATCTTCCCCCGGGTTCCC	2.0	6.0	empirical	PELP1_-_4607218.23-P1P2|PELP1_+_4607399.23-P1P2
ADRM1	P1P2	1-2	nonessential	ADRM1_+_60878013.23-P1P2	GCCCGCCGGAAACCCGCGTT	1.0	1.0	predicted	ADRM1_-_60878073.23-P1P2	TCCGGGCTCGCTCTTCCTCC	2.0	2.0	predicted	ADRM1_+_60878013.23-P1P2|ADRM1_-_60878073.23-P1P2
HMGCS1	P1P2	1-2	essential	HMGCS1_-_43313473.23-P1P2	GCTCACCAAGCGTGACCGAG	1.0	6.0	essential	HMGCS1_-_43313515.23-P1P2	CGGACTGTCCTTTCGTGGCC	2.0	3.0	essential	HMGCS1_-_43313473.23-P1P2|HMGCS1_-_43313515.23-P1P2
RIOK1	P1P2	1-2	essential	RIOK1_-_7390078.23-P1P2	GGGCAGGGTGGTGGATCTGT	1.0	1.0	essential	RIOK1_+_7390229.23-P1P2	GTCATGGACTACCGGCGGCC	2.0	7.0	essential	RIOK1_-_7390078.23-P1P2|RIOK1_+_7390229.23-P1P2
CENPE	P1P2	1-2	essential	CENPE_+_104119357.23-P1P2	GGGCGCCGCCCTGAGCCGGA	1.0	2.0	essential	CENPE_+_104119466.23-P1P2	CCGCCATCCTATCAGGCTGC	2.0	3.0	essential	CENPE_+_104119357.23-P1P2|CENPE_+_104119466.23-P1P2
ANAPC15	P1P2	1-2	nonessential	ANAPC15_+_71823713.23-P1P2	GAGCGCTTCCGGGTCGCCGC	1.0	1.0	predicted	ANAPC15_-_71823727.23-P1P2	GGTCGCCGCCGGCAGCAGCC	2.0	2.0	predicted	ANAPC15_+_71823713.23-P1P2|ANAPC15_-_71823727.23-P1P2
AATF	P1P2	1-2	significant	AATF_-_35306286.23-P1P2	GAGTGGCCGGTCCAGAGCTG	1.0	1.0	empirical	AATF_-_35306346.23-P1P2	GATCCTCTCGCCTTGATCCC	2.0	4.0	empirical	AATF_-_35306286.23-P1P2|AATF_-_35306346.23-P1P2
MARS	P1P2	1-2	significant	MARS_+_57881899.23-P1P2	GCAGCACCGGCAAGCAACCC	1.0	1.0	empirical	MARS_-_57881904.23-P1P2	GGGACGCCATCACTCACGAC	2.0	4.0	empirical	MARS_+_57881899.23-P1P2|MARS_-_57881904.23-P1P2
GTF2H2C	P1P2	1-2	significant	GTF2H2C_+_68856066.23-P1P2	GCTTCCACACGCGGACTCAC	1.0	7.0	empirical	GTF2H2C_-_68856063.23-P1P2	CTAGAAGGACTCTCAGCCGC	2.0	3.0	empirical	GTF2H2C_+_68856066.23-P1P2|GTF2H2C_-_68856063.23-P1P2
GTF3C1	P1P2	1-2	significant	GTF3C1_+_27561198.23-P1P2	GGAAGTAGCAATGGACGCGC	1.0	1.0	empirical	GTF3C1_+_27561207.23-P1P2	TTGCTACTTCAGTCGGCGGC	2.0	3.0	empirical	GTF3C1_+_27561198.23-P1P2|GTF3C1_+_27561207.23-P1P2
UQCRFS1	P1P2	1-2	essential	UQCRFS1_+_29704050.23-P1P2	GGGAAGGTCGTCCCTGTGAC	1.0	4.0	essential	UQCRFS1_-_29703611.23-P1P2	GGTTCCTCCTCGGCCGAGTC	2.0	5.0	essential	UQCRFS1_+_29704050.23-P1P2|UQCRFS1_-_29703611.23-P1P2
MNAT1	P1P2	1-2	essential	MNAT1_+_61201445.23-P1P2	GTCCCTTCGCGAAAGAGCAC	1.0	1.0	essential	MNAT1_-_61201531.23-P1P2	CCTACAAGCCCCCTCAGACC	2.0	5.0	essential	MNAT1_+_61201445.23-P1P2|MNAT1_-_61201531.23-P1P2
CCNK	P2	1-2	significant	CCNK_+_99969115.23-P2	GGGCTGTTGCAGCTGATGGG	1.0	1.0	predicted	CCNK_+_99969150.23-P2	ACACCACAAGTGCCGCAAGC	2.0	2.0	predicted	CCNK_+_99969115.23-P2|CCNK_+_99969150.23-P2
CHCHD4	P1P2	1-2	essential	CHCHD4_+_14166228.23-P1P2	GGAGGGAGGTCACGGCGTAA	1.0	9.0	essential	CHCHD4_-_14166123.23-P1P2	ACGAGGGCCTGCGGGAGACC	2.0	1.0	essential	CHCHD4_+_14166228.23-P1P2|CHCHD4_-_14166123.23-P1P2
TEFM	P1P2	1-2	significant	TEFM_+_29233191.23-P1P2	GAGCGGGTCTGTCCTCTTCA	1.0	2.0	empirical	TEFM_+_29233099.23-P1P2	TACCTCCCGCCGTATTCCAC	2.0	8.0	empirical	TEFM_+_29233191.23-P1P2|TEFM_+_29233099.23-P1P2
URB1	P1P2	1-2	significant	URB1_+_33765254.23-P1P2	GGCTCCTGCCGGGTCCCCTC	1.0	1.0	empirical	URB1_+_33764965.23-P1P2	CTGAGCCTATGTGACCCGAC	2.0	6.0	empirical	URB1_+_33765254.23-P1P2|URB1_+_33764965.23-P1P2
MYBL2	P1P2	1-2	essential	MYBL2_+_42295803.23-P1P2	GGGCCCCGGGCCGCGCTCGA	1.0	4.0	essential	MYBL2_-_42295783.23-P1P2	GCGCTCCTCGCTCGCAGGAC	2.0	3.0	essential	MYBL2_+_42295803.23-P1P2|MYBL2_-_42295783.23-P1P2
TTC27	P1P2	1-2	essential	TTC27_+_32853190.23-P1P2	GTGCGGATACTACCTCAAGG	1.0	3.0	essential	TTC27_+_32853193.23-P1P2	TGAGGTAGTATCCGCACATC	2.0	4.0	essential	TTC27_+_32853190.23-P1P2|TTC27_+_32853193.23-P1P2
TGS1	P1P2	1-2	significant	TGS1_+_56686046.23-P1P2	GGGAGATAGAAACTGGCCCG	1.0	5.0	empirical	TGS1_+_56686066.23-P1P2	CATCCAGGGCTTGCGGGCGC	2.0	1.0	empirical	TGS1_+_56686046.23-P1P2|TGS1_+_56686066.23-P1P2
ATP2A2	P1P2	1-2	significant	ATP2A2_+_110719114.23-P1P2	GGCCGCACGCCCGACAGCGG	1.0	1.0	empirical	ATP2A2_+_110719087.23-P1P2	CCTTTTCCTTCGCCGCAGTC	2.0	4.0	empirical	ATP2A2_+_110719114.23-P1P2|ATP2A2_+_110719087.23-P1P2
TRMT5	P1P2	1-2	essential	TRMT5_+_61447755.23-P1P2	GCCCGCGACCCACATCCGAT	1.0	7.0	essential	TRMT5_+_61447749.23-P1P2	GTACCGATCGGATGTGGGTC	2.0	5.0	essential	TRMT5_+_61447755.23-P1P2|TRMT5_+_61447749.23-P1P2
USP36	P1P2	1-2	significant	USP36_+_76836854.23-P1P2	GCGGGCCGAAGGAGTCGCCA	1.0	1.0	empirical	USP36_+_76836485.23-P1P2	AAGTTGACCTGAATCCTGCC	2.0	8.0	empirical	USP36_+_76836854.23-P1P2|USP36_+_76836485.23-P1P2
NUP43	P1P2	1-2	significant	NUP43_-_150067567.23-P1P2	GCGGTCTGTAAACTTCCCGG	1.0	1.0	empirical	NUP43_-_150067430.23-P1P2	ACCTTCTGGTTCTTCTCGCC	2.0	3.0	empirical	NUP43_-_150067567.23-P1P2|NUP43_-_150067430.23-P1P2
WDR77	P1P2	1-2	significant	WDR77_-_111991851.23-P1P2	GCCGGCCGGAGACTCCGCTC	1.0	2.0	empirical	WDR77_+_111991860.23-P1P2	ACGTGGTGCACCTCTGAGCC	2.0	4.0	empirical	WDR77_-_111991851.23-P1P2|WDR77_+_111991860.23-P1P2
CKAP5	P1	1-2	significant	CKAP5_+_46867805.23-P1	GCGGCCCAAGCGGTTTCAAA	1.0	1.0	empirical	CKAP5_-_46867793.23-P1	CTTGGTTCTGACCCAGCTGC	2.0	2.0	empirical	CKAP5_+_46867805.23-P1|CKAP5_-_46867793.23-P1
C12orf45	P1P2	1-2	essential	C12orf45_-_105380143.23-P1P2	GAGGGAAGCATGGAGGTCCA	1.0	2.0	essential	C12orf45_-_105380117.23-P1P2	GCACTCTCAGGCCCGGATGC	2.0	5.0	essential	C12orf45_-_105380143.23-P1P2|C12orf45_-_105380117.23-P1P2
WDR54	P1P2	1-2	nonessential	WDR54_+_74649083.23-P1P2	GGGCTGTTTTGGGGCGACGG	1.0	1.0	predicted	WDR54_-_74649047.23-P1P2	GATGGCCCCAAGCCCGCGAC	2.0	2.0	predicted	WDR54_+_74649083.23-P1P2|WDR54_-_74649047.23-P1P2
YKT6	P1P2	1-2	significant	YKT6_+_44240680.23-P1P2	GGCTGCGGGACCCGTTCTCA	1.0	2.0	empirical	YKT6_-_44240662.23-P1P2	TCGGGACCGCCGCCGCCTAC	2.0	1.0	empirical	YKT6_+_44240680.23-P1P2|YKT6_-_44240662.23-P1P2
PTBP1	P1P2	1-2	significant	PTBP1_+_797463.23-P1P2	GAGACCCGCGGGGGACGGAG	1.0	2.0	empirical	PTBP1_-_797442.23-P1P2	ACCCAACGGCTCCGAGTTAC	2.0	7.0	empirical	PTBP1_+_797463.23-P1P2|PTBP1_-_797442.23-P1P2
ANAPC11	P1P2	1-2	nonessential	ANAPC11_-_79849637.23-P1P2	GGACTCGGCGGGCGCTGTTG	1.0	1.0	predicted	ANAPC11_+_79849685.23-P1P2	GCGCTGCCAACGGAAGGGCC	2.0	2.0	predicted	ANAPC11_-_79849637.23-P1P2|ANAPC11_+_79849685.23-P1P2
ZNF236	P1P2	1-2	essential	ZNF236_+_74534757.23-P1P2	GGGCCCGCCCGGCCAGTCGG	1.0	2.0	essential	ZNF236_-_74534593.23-P1P2	TGGGCTTCGGGGGGCGGCCC	2.0	3.0	essential	ZNF236_+_74534757.23-P1P2|ZNF236_-_74534593.23-P1P2
CCDC115	P1P2	1-2	significant	CCDC115_+_131099673.23-P1P2	GGCGGCGCTTGACCTGCGAG	1.0	1.0	empirical	CCDC115_+_131099730.23-P1P2	TGTCACCCTCCGCAGTTTGC	2.0	4.0	empirical	CCDC115_+_131099673.23-P1P2|CCDC115_+_131099730.23-P1P2
RFC2	P1P2	1-2	essential	RFC2_+_73668703.23-P1P2	GGGAGGCGCGAGAATGGAGG	1.0	2.0	essential	RFC2_+_73668706.23-P1P2	CCATTCTCGCGCCTCCTCTC	2.0	1.0	essential	RFC2_+_73668703.23-P1P2|RFC2_+_73668706.23-P1P2
MFN2	P1	1-2	significant	MFN2_-_12040716.23-P1	GTCCCCGGCCCTGAGAGGAG	1.0	3.0	empirical	MFN2_-_12040541.23-P1	TCACCTTCCCGGCCTCGCGC	2.0	1.0	empirical	MFN2_-_12040716.23-P1|MFN2_-_12040541.23-P1
PNKP	P1P2	1-2	significant	PNKP_-_50370388.23-P1P2	GCCAGGGCTTGCCCGTCCGA	1.0	2.0	empirical	PNKP_-_50370765.23-P1P2	TGGTCGGAAGTGGCCGTGAC	2.0	1.0	empirical	PNKP_-_50370388.23-P1P2|PNKP_-_50370765.23-P1P2
MOCS3	P1P2	1-2	nonessential	MOCS3_+_49575386.23-P1P2	GAAGGCGAGTACCTCCTCCC	1.0	1.0	predicted	MOCS3_-_49575382.23-P1P2	TGGCGACCTCTTCCGGAAGC	2.0	2.0	predicted	MOCS3_+_49575386.23-P1P2|MOCS3_-_49575382.23-P1P2
FAM136A	P1P2	1-2	significant	FAM136A_-_70528767.23-P1P2	GGCCGCGTAAGAGGGGAAGG	1.0	7.0	empirical	FAM136A_-_70529195.23-P1P2	ATTCCATATGGGCGCCGGCC	2.0	4.0	empirical	FAM136A_-_70528767.23-P1P2|FAM136A_-_70529195.23-P1P2
USP5	P2	1-2	significant	USP5_-_6965971.23-P2	GGCTACTTCGATGGCAGTGG	2.0	2.0	predicted	USP5_+_6966012.23-P2	TTAGCTGTCAAGCTGGGCAC	3.0	3.0	predicted	USP5_-_6965971.23-P2|USP5_+_6966012.23-P2
ZNF100	P1P2	1-2	nonessential	ZNF100_-_21950100.23-P1P2	GTTATGGCCGAAGGGGACGG	1.0	1.0	predicted	ZNF100_-_21950097.23-P1P2	TCCCCTTCGGCCATAAGATC	4.0	4.0	predicted	ZNF100_-_21950100.23-P1P2|ZNF100_-_21950097.23-P1P2
RPA2	P1P2	1-2	essential	RPA2_+_28240864.23-P1P2	GGGCGAGCCTAGGGTCCGAG	1.0	5.0	essential	RPA2_-_28241061.23-P1P2	GAGAAAAGTAGCCAGAGCGC	2.0	2.0	essential	RPA2_+_28240864.23-P1P2|RPA2_-_28241061.23-P1P2
KDM2A	P1P2	1-2	significant	KDM2A_-_66886795.23-P1P2	GAGCGGCTCCTCCTGTGTGA	1.0	4.0	empirical	KDM2A_+_66886784.23-P1P2	GTGTGAGGGAAACAACACCC	2.0	3.0	empirical	KDM2A_-_66886795.23-P1P2|KDM2A_+_66886784.23-P1P2
DPM2	P1P2	1-2	nonessential	DPM2_+_130700064.23-P1P2	GCACCGTGTGCCGGAGATAG	1.0	1.0	predicted	DPM2_-_130700076.23-P1P2	GAGATAGGGGCGTCTGGGGC	2.0	2.0	predicted	DPM2_+_130700064.23-P1P2|DPM2_-_130700076.23-P1P2
TSEN34	P1P2	1-2	nonessential	TSEN34_-_54695166.23-P1P2	GGGTGCGCTGCAGCGGTCTG	1.0	1.0	predicted	TSEN34_-_54695081.23-P1P2	CCGTTCACCACCTGCTGGGC	2.0	2.0	predicted	TSEN34_-_54695166.23-P1P2|TSEN34_-_54695081.23-P1P2
MRPS16	P1P2	1-2	significant	MRPS16_+_75012360.23-P1P2	GTTTTCGGGCTTGTACCGCT	1.0	1.0	empirical	MRPS16_-_75012367.23-P1P2	CTTGGCGGTGCGGCCTGGTC	2.0	6.0	empirical	MRPS16_+_75012360.23-P1P2|MRPS16_-_75012367.23-P1P2
BAP1	P1P2	1-2	significant	BAP1_+_52443980.23-P1P2	GGTCTGTGTGTGGGACTGAG	1.0	1.0	empirical	BAP1_+_52443883.23-P1P2	TTATTCATCTTCCCGCGGGC	2.0	7.0	empirical	BAP1_+_52443980.23-P1P2|BAP1_+_52443883.23-P1P2
POLR2B	P1P2	1-2	essential	POLR2B_+_57845253.23-P1P2	GGTGCAGCCGGCGCATGGGA	1.0	10.0	essential	POLR2B_+_57845291.23-P1P2	ACACTTACCAGGCCGGGAAC	2.0	2.0	essential	POLR2B_+_57845253.23-P1P2|POLR2B_+_57845291.23-P1P2
TEN1	P1P2	1-2	nonessential	TEN1_-_73975358.23-P1P2	GACAGCGGCCCAGACAGAGG	1.0	1.0	predicted	TEN1_+_73975344.23-P1P2	AGACAGAGGGGGCGATGTCC	2.0	2.0	predicted	TEN1_-_73975358.23-P1P2|TEN1_+_73975344.23-P1P2
SMUG1	P1P2	1-2	significant	SMUG1_+_54582758.23-P1P2	GTGGGGTGGGGGAAAGGAAC	1.0	10.0	empirical	SMUG1_-_54582517.23-P1P2	CCGGAGGTTTTGTATGGTGC	2.0	6.0	empirical	SMUG1_+_54582758.23-P1P2|SMUG1_-_54582517.23-P1P2
RFC5	P1P2	1-2	significant	RFC5_-_118454586.23-P1P2	GGGTCACTGTGCAGGCGCTT	1.0	1.0	empirical	RFC5_-_118454562.23-P1P2	CGACCTGACCCTGAGACCCC	2.0	3.0	empirical	RFC5_-_118454586.23-P1P2|RFC5_-_118454562.23-P1P2
KCNA10	ENST00000369771.2	1-2	nonessential	KCNA10_-_111061735.23-ENST00000369771.2	GGGATGGTCTCCATATGTGA	1.0	1.0	predicted	KCNA10_+_111061723.23-ENST00000369771.2	TATGTGATGGCAGAGGGGCC	2.0	2.0	predicted	KCNA10_-_111061735.23-ENST00000369771.2|KCNA10_+_111061723.23-ENST00000369771.2
SAP30BP	P1P2	1-2	nonessential	SAP30BP_+_73663509.23-P1P2	GCAGCCTCGCCATCAGACTC	1.0	1.0	predicted	SAP30BP_-_73663445.23-P1P2	ACAGCCCGGGCGTGGCTCAC	2.0	2.0	predicted	SAP30BP_+_73663509.23-P1P2|SAP30BP_-_73663445.23-P1P2
ING3	P1P2	1-2	significant	ING3_+_120590830.23-P1P2	GAGCAGCACCCGCTCGACTC	1.0	9.0	empirical	ING3_-_120590856.23-P1P2	CTAGCAGCACCCGCTCGACC	2.0	4.0	empirical	ING3_+_120590830.23-P1P2|ING3_-_120590856.23-P1P2
KTI12	P1P2	1-2	significant	KTI12_-_52499429.23-P1P2	GGCCCGCAAAACACCACGAG	1.0	2.0	empirical	KTI12_-_52499454.23-P1P2	ATGGTCGCTCCCTGAGAGGC	2.0	3.0	empirical	KTI12_-_52499429.23-P1P2|KTI12_-_52499454.23-P1P2
COPS3	P1P2	1-2	significant	COPS3_+_17184553.23-P1P2	GGCGGCCCCTCCTCCCAGAG	1.0	3.0	empirical	COPS3_-_17184489.23-P1P2	TGGAGCAGTTCGTGAACAGC	2.0	4.0	empirical	COPS3_+_17184553.23-P1P2|COPS3_-_17184489.23-P1P2
MMS19	P1P2	1-2	significant	MMS19_-_99258162.23-P1P2	GAACGCGAACTAGAGACCGT	1.0	2.0	empirical	MMS19_+_99258100.23-P1P2	ATAGGCGCCGCCGCCTCCAC	2.0	9.0	empirical	MMS19_-_99258162.23-P1P2|MMS19_+_99258100.23-P1P2
SART1	P1P2	1-2	essential	SART1_-_65729256.23-P1P2	GGAGTGGACGTGCCACTATG	1.0	3.0	essential	SART1_-_65729572.23-P1P2	CCTCACCGGCCTCGTAGCCC	2.0	9.0	essential	SART1_-_65729256.23-P1P2|SART1_-_65729572.23-P1P2
COPS5	P1P2	1-2	significant	COPS5_-_67974403.23-P1P2	GAGTTGGTAGAGACCATTCA	1.0	2.0	empirical	COPS5_-_67974325.23-P1P2	TGGTGCGGAGGGTCAAGGCC	2.0	1.0	empirical	COPS5_-_67974403.23-P1P2|COPS5_-_67974325.23-P1P2
TUBGCP3	P1P2	1-2	essential	TUBGCP3_+_113242380.23-P1P2	GCAGGAGCAGGGAGCTTGCG	1.0	1.0	essential	TUBGCP3_-_113242418.23-P1P2	GCGCCTTAGCCTGTCAGGAC	2.0	5.0	essential	TUBGCP3_+_113242380.23-P1P2|TUBGCP3_-_113242418.23-P1P2
SMARCE1	P1P2	1-2	significant	SMARCE1_-_38804030.23-P1P2	GCTTGGAAACACTCACCCGC	1.0	3.0	empirical	SMARCE1_+_38803858.23-P1P2	ACCCTCGCTCTGCTAGGCCC	2.0	8.0	empirical	SMARCE1_-_38804030.23-P1P2|SMARCE1_+_38803858.23-P1P2
AASDHPPT	P1P2	1-2	significant	AASDHPPT_+_105948405.23-P1P2	GCGGACCTCGCCGCTATCTC	1.0	2.0	empirical	AASDHPPT_+_105948450.23-P1P2	AACGGTTCTGCTTGGTGCCC	2.0	3.0	empirical	AASDHPPT_+_105948405.23-P1P2|AASDHPPT_+_105948450.23-P1P2
SRRM2	P1P2	1-2	significant	SRRM2_-_2802729.23-P1P2	GAGCGAGGAGGCGTCGGCGT	1.0	5.0	empirical	SRRM2_-_2802723.23-P1P2	ACGCCTCCTCGCTTCCTCAC	2.0	1.0	empirical	SRRM2_-_2802729.23-P1P2|SRRM2_-_2802723.23-P1P2
TFIP11	P1P2	1-2	significant	TFIP11_+_26908413.23-P1P2	GCCGGGTTCTGGTGTAGGAG	1.0	1.0	empirical	TFIP11_+_26908398.23-P1P2	CGCGAGAAGACGCCGCTCCC	2.0	5.0	empirical	TFIP11_+_26908413.23-P1P2|TFIP11_+_26908398.23-P1P2
PSMD12	P1P2	1-2	essential	PSMD12_+_65362663.23-P1P2	GCGAGTGGTGGCCGAAGCAG	1.0	3.0	essential	PSMD12_+_65362472.23-P1P2	CGCCGTGACTCAGCCCCTGC	2.0	2.0	essential	PSMD12_+_65362663.23-P1P2|PSMD12_+_65362472.23-P1P2
EMC1	P1P2	1-2	significant	EMC1_+_19577996.23-P1P2	GGCATGCGCTCGCATCATGG	1.0	2.0	empirical	EMC1_+_19577987.23-P1P2	ACTCAGCCGCCATGATGCGC	2.0	1.0	empirical	EMC1_+_19577996.23-P1P2|EMC1_+_19577987.23-P1P2
USPL1	P1P2	1-2	significant	USPL1_-_31192127.23-P1P2	GGGGTTGAACGTTGCAACTA	1.0	2.0	empirical	USPL1_-_31192108.23-P1P2	ACGTTCCCCTCGGACTGCTC	2.0	1.0	empirical	USPL1_-_31192127.23-P1P2|USPL1_-_31192108.23-P1P2
SLC9B1	P1P2	1-2	nonessential	SLC9B1_-_103940841.23-P1P2	GAGCCACGCGCCACCCAGGT	1.0	1.0	predicted	SLC9B1_+_103940810.23-P1P2	TTGCGTAAGCCACGCGCCAC	2.0	2.0	predicted	SLC9B1_-_103940841.23-P1P2|SLC9B1_+_103940810.23-P1P2
ZNF674	P1P2	1-2	nonessential	ZNF674_+_46404792.23-P1P2	GGGCAGTGAAGTAAGCGGGA	1.0	1.0	predicted	ZNF674_+_46404797.23-P1P2	CTTACTTCACTGCCGACAGC	2.0	2.0	predicted	ZNF674_+_46404792.23-P1P2|ZNF674_+_46404797.23-P1P2
HYPK	P1P2	1-2	significant	HYPK_-_44093008.23-P1P2	GGTTGGCCAAGAGCATGTCG	1.0	5.0	empirical	HYPK_-_44092879.23-P1P2	CTCTGGTCCACTGGTCTCAC	2.0	4.0	empirical	HYPK_-_44093008.23-P1P2|HYPK_-_44092879.23-P1P2
OXA1L	P1P2	1-2	essential	OXA1L_-_23235932.23-P1P2	GTGGCGATGGGACTAATGTG	1.0	2.0	essential	OXA1L_+_23236287.23-P1P2	CTGCATGCCTTCGGGCTAGC	2.0	10.0	essential	OXA1L_-_23235932.23-P1P2|OXA1L_+_23236287.23-P1P2
PSMB6	P1	1-2	essential	PSMB6_-_4699495.23-P1	GTACCGGAGGAGAAAGATGG	1.0	3.0	essential	PSMB6_-_4699534.23-P1	GTGCTGGCCCGGCTCCCCGC	2.0	4.0	essential	PSMB6_-_4699495.23-P1|PSMB6_-_4699534.23-P1
PRC1	P1P2	1-2	significant	PRC1_+_91537740.23-P1P2	GGGCTCGCGGAGCGGCTACG	1.0	1.0	empirical	PRC1_+_91537748.23-P1P2	CTCCGCGAGCCGTTGAGCCC	2.0	2.0	empirical	PRC1_+_91537740.23-P1P2|PRC1_+_91537748.23-P1P2
UBA1	P1	1-2	essential	UBA1_-_47053260.23-P1	GCGGCTCGGCTGTAAGGAGG	1.0	3.0	essential	UBA1_-_47053257.23-P1	CCTTACAGCCGAGCCGCCGC	2.0	4.0	essential	UBA1_-_47053260.23-P1|UBA1_-_47053257.23-P1
NUMA1	ENST00000393695.3	1-2	significant	NUMA1_+_71791334.23-ENST00000393695.3	GGTGAGGAGAGGCGCCTGAG	1.0	10.0	empirical	NUMA1_+_71791707.23-ENST00000393695.3	CTTCCGGACCCCGGCCTGTC	2.0	2.0	empirical	NUMA1_+_71791334.23-ENST00000393695.3|NUMA1_+_71791707.23-ENST00000393695.3
PAK1IP1	P1P2	1-2	significant	PAK1IP1_+_10695250.23-P1P2	GGTGTACAGCGAACCCAAAG	1.0	2.0	empirical	PAK1IP1_-_10695248.23-P1P2	GCTCGTAGCAACCAGCGACC	2.0	7.0	empirical	PAK1IP1_+_10695250.23-P1P2|PAK1IP1_-_10695248.23-P1P2
CSTF1	P1P2	1-2	essential	CSTF1_+_54967480.23-P1P2	GCGACCGCGGAGAGCACCCT	1.0	2.0	essential	CSTF1_-_54967707.23-P1P2	AATCTACCGCTCCGAGCGCC	2.0	4.0	essential	CSTF1_+_54967480.23-P1P2|CSTF1_-_54967707.23-P1P2
EARS2	P1P2	1-2	significant	EARS2_+_23568615.23-P1P2	GCAGCGCGAGAGGCCTTCGG	1.0	1.0	empirical	EARS2_+_23568646.23-P1P2	CAGGAGCGCCGCCATGTGGC	2.0	3.0	empirical	EARS2_+_23568615.23-P1P2|EARS2_+_23568646.23-P1P2
DDX52	P1P2	1-2	essential	DDX52_-_36003440.23-P1P2	GGAGCCGGCGAAAGAGATCG	1.0	3.0	essential	DDX52_-_36003249.23-P1P2	CCCTTGGGGTATTTTGCTTC	2.0	6.0	essential	DDX52_-_36003440.23-P1P2|DDX52_-_36003249.23-P1P2
PLK4	P1P2	1-2	significant	PLK4_-_128802078.23-P1P2	GTAGCTCGGACGGCAAGCGG	1.0	4.0	empirical	PLK4_-_128802116.23-P1P2	GGGCGGTGCCTCTGGGCTCC	2.0	3.0	empirical	PLK4_-_128802078.23-P1P2|PLK4_-_128802116.23-P1P2
RBMX2	P1P2	1-2	essential	RBMX2_-_129536016.23-P1P2	GAACCCGAGGAGATGAAGTA	1.0	1.0	essential	RBMX2_-_129536058.23-P1P2	CCAGTGGCCCGCTGCTCCTC	2.0	5.0	essential	RBMX2_-_129536016.23-P1P2|RBMX2_-_129536058.23-P1P2
TIMM10	P1P2	1-2	significant	TIMM10_+_57298154.23-P1P2	GCAGAAGTTGGGGTCTCCGT	1.0	1.0	predicted	TIMM10_-_57298218.23-P1P2	CTGGAGCCTCTCGGGAGGCC	2.0	2.0	predicted	TIMM10_+_57298154.23-P1P2|TIMM10_-_57298218.23-P1P2
POLD3	P1P2	1-2	essential	POLD3_+_74303696.23-P1P2	GAAGCTGGTCCGCCATGGTG	1.0	3.0	essential	POLD3_-_74303671.23-P1P2	CTCTCAATCACAGCCACAGC	2.0	7.0	essential	POLD3_+_74303696.23-P1P2|POLD3_-_74303671.23-P1P2
BCAR1	P1	1-2	significant	BCAR1_-_75285241.23-P1	GAGGGCAGAAGGAGATCCCA	1.0	3.0	empirical	BCAR1_+_75285561.23-P1	GATCCCAGCATGCCCGGCCC	1.0	1.0	predicted	BCAR1_-_75285241.23-P1|BCAR1_+_75285561.23-P1
VPS25	P1P2	1-2	significant	VPS25_+_40925531.23-P1P2	GGCCTCACGTAAAGAAGGGT	1.0	1.0	empirical	VPS25_+_40925514.23-P1P2	TGGCAGTATCGCTTCCCACC	2.0	2.0	empirical	VPS25_+_40925531.23-P1P2|VPS25_+_40925514.23-P1P2
PPAN	P1P2	1-2	essential	PPAN_-_10217074.23-P1P2	GGTGGAGGACACAGCAGCAT	1.0	4.0	essential	PPAN_-_10217084.23-P1P2	TGACTGTCCCATGCTGCTGC	2.0	3.0	essential	PPAN_-_10217074.23-P1P2|PPAN_-_10217084.23-P1P2
MRPL37	P1P2	1-2	essential	MRPL37_-_54665919.23-P1P2	GTGAGGCTATCAGATCGGTA	1.0	3.0	essential	MRPL37_-_54665902.23-P1P2	CAAGACCTCCACCTGGACCC	2.0	1.0	essential	MRPL37_-_54665919.23-P1P2|MRPL37_-_54665902.23-P1P2
PELO	P2	1-2	essential	PELO_-_52083812.23-P2	GAGATCACCCTCTCAATGAA	1.0	1.0	predicted	PELO_-_52084090.23-P2	CGGTTCCCAGTCCTCTGCCC	2.0	2.0	predicted	PELO_-_52083812.23-P2|PELO_-_52084090.23-P2
CARS	P1P2	1-2	essential	CARS_+_3078579.23-P1P2	GAGCCATGGCAGATTCCTCC	1.0	3.0	essential	CARS_-_3078598.23-P1P2	TGGCAGATTCCTCCGGGCAC	2.0	2.0	essential	CARS_+_3078579.23-P1P2|CARS_-_3078598.23-P1P2
STX18	P1P2	1-2	significant	STX18_+_4543702.23-P1P2	GGGGCCTAGTGTGGGGCTGA	1.0	5.0	empirical	STX18_+_4543725.23-P1P2	ACGTAAGCAGCCGGCGACCC	2.0	1.0	empirical	STX18_+_4543702.23-P1P2|STX18_+_4543725.23-P1P2
SLC25A3	P1P2	1-2	significant	SLC25A3_-_98987489.23-P1P2	GTGAGCCGCAACCTTTCCAA	1.0	1.0	empirical	SLC25A3_-_98987494.23-P1P2	CTCCCTTGGAAAGGTTGCGC	2.0	4.0	empirical	SLC25A3_-_98987489.23-P1P2|SLC25A3_-_98987494.23-P1P2
PSMG1	P1P2	1-2	significant	PSMG1_-_40554934.23-P1P2	GGAACCCAGCCCTCCCACAG	1.0	2.0	empirical	PSMG1_+_40555286.23-P1P2	CTCCGAAGAACGTGGCCGCC	2.0	7.0	empirical	PSMG1_-_40554934.23-P1P2|PSMG1_+_40555286.23-P1P2
DPH1	P1	1-2	significant	DPH1_-_1933503.23-P1	GCCGGGGCAGCGGAGCAGGG	1.0	4.0	empirical	DPH1_-_1933469.23-P1	CCATCACCTGCCTGCGCATC	2.0	3.0	empirical	DPH1_-_1933503.23-P1|DPH1_-_1933469.23-P1
INTS4	P1P2	1-2	essential	INTS4_-_77705700.23-P1P2	GGCGCCGCCATGCCTACCCG	1.0	7.0	essential	INTS4_+_77705685.23-P1P2	TGCCTACCCGCGGGCCCTCC	2.0	2.0	essential	INTS4_-_77705700.23-P1P2|INTS4_+_77705685.23-P1P2
RAD51D	P1P2	1-2	significant	RAD51D_-_33446794.23-P1P2	GGGAGGCGGCACCAAGGGTA	1.0	1.0	empirical	RAD51D_-_33446789.23-P1P2	TTGGTGCCGCCTCCTCCTCC	2.0	2.0	empirical	RAD51D_-_33446794.23-P1P2|RAD51D_-_33446789.23-P1P2
CYS1	P1P2	1-2	nonessential	CYS1_+_10220308.23-P1P2	GGAGCAGCCGGACTCTGAGG	1.0	1.0	predicted	CYS1_-_10220299.23-P1P2	CGAGAGCCTCCCCGCGGGGC	2.0	2.0	predicted	CYS1_+_10220308.23-P1P2|CYS1_-_10220299.23-P1P2
SUPT6H	P1P2	1-2	essential	SUPT6H_+_26989285.23-P1P2	GGAGTCGTCGAACCGAGACT	1.0	1.0	essential	SUPT6H_+_26989271.23-P1P2	TACTATCTTTTCCCAGTCTC	2.0	5.0	essential	SUPT6H_+_26989285.23-P1P2|SUPT6H_+_26989271.23-P1P2
VPS72	P1P2	1-2	essential	VPS72_+_151162629.23-P1P2	GCCAAAACCGAGCTGGTGAG	1.0	2.0	essential	VPS72_+_151162601.23-P1P2	ACCGAGACTGCGCCGCCACC	2.0	1.0	essential	VPS72_+_151162629.23-P1P2|VPS72_+_151162601.23-P1P2
SMC3	P1P2	1-2	significant	SMC3_-_112327541.23-P1P2	GCCGTGCGGTTGCTGCTCCG	1.0	3.0	empirical	SMC3_+_112327512.23-P1P2	TGCGGCCGTGCGGTTGCTGC	2.0	1.0	empirical	SMC3_-_112327541.23-P1P2|SMC3_+_112327512.23-P1P2
SUGP1	P1P2	1-2	significant	SUGP1_-_19431214.23-P1P2	GGACGGACCCGAGGAGTCAG	1.0	1.0	empirical	SUGP1_-_19431183.23-P1P2	GTGGATCCCTCGCTTCAGCC	2.0	4.0	empirical	SUGP1_-_19431214.23-P1P2|SUGP1_-_19431183.23-P1P2
CDIPT	P1P2	1-2	nonessential	CDIPT_+_29874463.23-P1P2	GCCACGCGCAGCTGGAGCAG	1.0	1.0	predicted	CDIPT_+_29874410.23-P1P2	CCCTCGCCTCTGCCAGCCCC	2.0	2.0	predicted	CDIPT_+_29874463.23-P1P2|CDIPT_+_29874410.23-P1P2
HNRNPM	P2	1-2	significant	HNRNPM_-_8536287.23-P2	GATCACCTGAATAAAGGCAT	1.0	1.0	predicted	HNRNPM_+_8536305.23-P2	CAGGTGAGAATGACAGTGCC	2.0	2.0	predicted	HNRNPM_-_8536287.23-P2|HNRNPM_+_8536305.23-P2
KLF7	P1P2	1-2	significant	KLF7_+_208031206.23-P1P2	GGGCTCTGCCAGGCATCTAG	1.0	9.0	empirical	KLF7_+_208030196.23-P1P2	GGTCTCCTCCAGGGATGGTC	2.0	5.0	empirical	KLF7_+_208031206.23-P1P2|KLF7_+_208030196.23-P1P2
GLE1	P1P2	1-2	significant	GLE1_-_131267022.23-P1P2	GGCCTGTGTGGCCTTCCCGG	1.0	3.0	empirical	GLE1_+_131267242.23-P1P2	AGCCGTTGGCACGTTCTGCC	2.0	7.0	empirical	GLE1_-_131267022.23-P1P2|GLE1_+_131267242.23-P1P2
RPL38	P1P2	1-2	essential	RPL38_-_72199864.23-P1P2	GCTTGCTGTGAGTGTCTCTA	1.0	2.0	essential	RPL38_-_72199874.23-P1P2	CGTATCACCCTAGAGACACC	2.0	1.0	essential	RPL38_-_72199864.23-P1P2|RPL38_-_72199874.23-P1P2
TIMM23B	P1P2	1-2	essential	TIMM23B_-_51371488.23-P1P2	GTTGAGGAGTAACGGCCCAG	1.0	4.0	essential	TIMM23B_-_51371437.23-P1P2	ACTTCACACGCTGACCTTCC	2.0	5.0	essential	TIMM23B_-_51371488.23-P1P2|TIMM23B_-_51371437.23-P1P2
RFFL	P1P2	1-2	nonessential	RFFL_-_33416281.23-P1P2	GGCGGTCGCGACATCCTCAC	1.0	1.0	predicted	RFFL_+_33416253.23-P1P2	GGGGGCGGTCGCGACATCCC	4.0	4.0	predicted	RFFL_-_33416281.23-P1P2|RFFL_+_33416253.23-P1P2
USP5	P1	1-2	significant	USP5_+_6961501.23-P1	GGGCCCCAGCGGAATGACCA	1.0	8.0	empirical	USP5_+_6961472.23-P1	GCAACGAGCACGACTTCCTC	2.0	2.0	empirical	USP5_+_6961501.23-P1|USP5_+_6961472.23-P1
RPS7	P1P2	1-2	essential	RPS7_-_3622944.23-P1P2	GAGCCGGCGCTCGGCAAGGT	1.0	6.0	essential	RPS7_-_3622948.23-P1P2	ACCTACCTTGCCGAGCGCCC	2.0	3.0	essential	RPS7_-_3622944.23-P1P2|RPS7_-_3622948.23-P1P2
TVP23C	P1P2	1-2	nonessential	TVP23C_+_15466774.23-P1P2	GTGGCTCCTGGAAGCAGGGC	1.0	1.0	predicted	TVP23C_+_15466886.23-P1P2	CACCTCCGCTTTGAGGGAGC	2.0	2.0	predicted	TVP23C_+_15466774.23-P1P2|TVP23C_+_15466886.23-P1P2
ACTR8	P1P2	1-2	significant	ACTR8_+_53916142.23-P1P2	GGCTGAGGCGAGAGGTTGGT	1.0	3.0	empirical	ACTR8_+_53916157.23-P1P2	CAGCGCTGCAGCCACGACTC	2.0	2.0	empirical	ACTR8_+_53916142.23-P1P2|ACTR8_+_53916157.23-P1P2
CEBPZ	P1P2	1-2	essential	CEBPZ_+_37458499.23-P1P2	GGCGTGGAGAGTTCCGAAGG	1.0	3.0	essential	CEBPZ_+_37458694.23-P1P2	TGACTGCGGCCATGGCGGGC	2.0	1.0	essential	CEBPZ_+_37458499.23-P1P2|CEBPZ_+_37458694.23-P1P2
BRCA2	P1P2	1-2	significant	BRCA2_+_32889673.23-P1P2	GGACACCCGAGGCGCAGCAG	1.0	3.0	empirical	BRCA2_-_32889662.23-P1P2	CAGCGGCTCCGCCTCTGCCC	2.0	4.0	empirical	BRCA2_+_32889673.23-P1P2|BRCA2_-_32889662.23-P1P2
POLR3F	P1P2	1-2	essential	POLR3F_+_18448087.23-P1P2	GGCAGCCCGGTAGCAAGCCG	1.0	5.0	essential	POLR3F_+_18448066.23-P1P2	CCACTGGTTCCCCGGGTTCC	2.0	3.0	essential	POLR3F_+_18448087.23-P1P2|POLR3F_+_18448066.23-P1P2
COG6	P1P2	1-2	significant	COG6_-_40229866.23-P1P2	GGGCGGGACGCGCAGCGCTA	1.0	2.0	empirical	COG6_+_40230096.23-P1P2	CGGTCTCCCTCGTCCCGGCC	2.0	4.0	empirical	COG6_-_40229866.23-P1P2|COG6_+_40230096.23-P1P2
RPUSD4	P1P2	1-2	significant	RPUSD4_+_126081489.23-P1P2	GCGTCGGGCCCCTGGATCCG	1.0	5.0	empirical	RPUSD4_-_126081590.23-P1P2	CATTGTAGTCGCCCTTCTCC	2.0	1.0	empirical	RPUSD4_+_126081489.23-P1P2|RPUSD4_-_126081590.23-P1P2
GABPA	P1P2	1-2	nonessential	GABPA_+_27107880.23-P1P2	GCGGCCGCACTCACCCACTC	1.0	1.0	predicted	GABPA_+_27107761.23-P1P2	CACACTTCTAGTCGCGGGAC	2.0	2.0	predicted	GABPA_+_27107880.23-P1P2|GABPA_+_27107761.23-P1P2
TIMM22	P1P2	1-2	significant	TIMM22_-_900407.23-P1P2	GCGGCGGCCGCCCCCAATGC	1.0	2.0	empirical	TIMM22_-_900430.23-P1P2	CTGTCTCAGGGGCCGAGCCC	2.0	1.0	empirical	TIMM22_-_900407.23-P1P2|TIMM22_-_900430.23-P1P2
SLC35G6	ENST00000412468.2	1-2	nonessential	SLC35G6_+_7384871.23-ENST00000412468.2	GGGAGCAACCAGGAGCTATA	1.0	1.0	predicted	SLC35G6_+_7384868.23-ENST00000412468.2	CCCTATAGCTCCTGGTTGCC	2.0	2.0	predicted	SLC35G6_+_7384871.23-ENST00000412468.2|SLC35G6_+_7384868.23-ENST00000412468.2
EIF4G2	P1	1-2	essential	EIF4G2_+_10830441.23-P1	GAGTCGGAGCTCTATGGAGG	1.0	1.0	essential	EIF4G2_+_10830444.23-P1	CCATAGAGCTCCGACTCACC	2.0	3.0	essential	EIF4G2_+_10830441.23-P1|EIF4G2_+_10830444.23-P1
RPS19	P1P2	1-2	essential	RPS19_-_42364369.23-P1P2	GGAGGCCGCACGGTAAGCGG	1.0	1.0	essential	RPS19_+_42364314.23-P1P2	CGTCGTTCCCTTTCCCCTGC	2.0	2.0	essential	RPS19_-_42364369.23-P1P2|RPS19_+_42364314.23-P1P2
NCBP2	P1P2	1-2	essential	NCBP2_-_196669400.23-P1P2	GAGAGAAGCGGACCACAATG	1.0	1.0	essential	NCBP2_-_196669410.23-P1P2	GGAGTCGCCGCATTGTGGTC	2.0	9.0	essential	NCBP2_-_196669400.23-P1P2|NCBP2_-_196669410.23-P1P2
ZNF133	P1P2	1-2	nonessential	ZNF133_+_18269225.23-P1P2	GAGCGCCACCAAAGAACAAG	1.0	1.0	predicted	ZNF133_-_18269198.23-P1P2	CCAGCGGGGCGCCAGGACTC	2.0	2.0	predicted	ZNF133_+_18269225.23-P1P2|ZNF133_-_18269198.23-P1P2
KRTAP4-7	ENST00000391417.4	1-2	nonessential	KRTAP4-7_+_39240934.23-ENST00000391417.4	GTGAAGGGGGACGTGAGCCA	1.0	1.0	predicted	KRTAP4-7_+_39240927.23-ENST00000391417.4	ACTGCCCTGGCTCACGTCCC	2.0	2.0	predicted	KRTAP4-7_+_39240934.23-ENST00000391417.4|KRTAP4-7_+_39240927.23-ENST00000391417.4
POU5F1B	P1P2	1-2	nonessential	POU5F1B_+_128428174.23-P1P2	GAGCCCGGCTCCGCCCCCCA	1.0	1.0	predicted	POU5F1B_-_128428164.23-P1P2	ACCGCCTGGAGGGGGCGAGC	2.0	2.0	predicted	POU5F1B_+_128428174.23-P1P2|POU5F1B_-_128428164.23-P1P2
DNM1	P1P2	1-2	nonessential	DNM1_-_130965664.23-P1P2	GCCCGCGGCGCAGGCAGTCT	1.0	1.0	predicted	DNM1_+_130965698.23-P1P2	GGAGCGCTAGCGGCAGCCGC	2.0	2.0	predicted	DNM1_-_130965664.23-P1P2|DNM1_+_130965698.23-P1P2
MCM7	P1P2	1-2	nonessential	MCM7_-_99698958.23-P1P2	GCCGCGCTTGGCGGGCTCAG	1.0	1.0	predicted	MCM7_-_99698936.23-P1P2	CACGGCCCTCGGCAGCGATC	2.0	2.0	predicted	MCM7_-_99698958.23-P1P2|MCM7_-_99698936.23-P1P2
CBLN1	P1P2	1-2	nonessential	CBLN1_+_49315691.23-P1P2	GTAATTCAGAGCGGCGGCGG	1.0	1.0	predicted	CBLN1_+_49315694.23-P1P2	CCGCCGCTCTGAATTATTGC	2.0	2.0	predicted	CBLN1_+_49315691.23-P1P2|CBLN1_+_49315694.23-P1P2
RPS15	P1P2	1-2	significant	RPS15_-_1438413.23-P1P2	GACCAAAGCGATCTCTTCTG	1.0	3.0	empirical	RPS15_-_1438633.23-P1P2	GACATGAAGGCCCGGACAGC	2.0	1.0	empirical	RPS15_-_1438413.23-P1P2|RPS15_-_1438633.23-P1P2
PTMA	P1P2	1-2	nonessential	PTMA_-_232573243.23-P1P2	GCGCCGCGTGAGTCCCCCAC	1.0	1.0	predicted	PTMA_+_232573482.23-P1P2	CTCGGGGTCCGCGCGCCGCC	2.0	2.0	predicted	PTMA_-_232573243.23-P1P2|PTMA_+_232573482.23-P1P2
MRPL13	P1P2	1-2	essential	MRPL13_+_121457360.23-P1P2	GCGGCGTGGCTACTAGGAGA	1.0	4.0	essential	MRPL13_+_121457366.23-P1P2	AGTAGCCACGCCGGGTCACC	2.0	2.0	essential	MRPL13_+_121457360.23-P1P2|MRPL13_+_121457366.23-P1P2
ZNF207	P1	1-2	significant	ZNF207_-_30677224.23-P1	GGGACGTGGTGGTAGCCGTT	1.0	4.0	empirical	ZNF207_-_30677213.23-P1	CCACGTCCCACAGGAAGCAC	2.0	3.0	empirical	ZNF207_-_30677224.23-P1|ZNF207_-_30677213.23-P1
STAT5A	P1P2	1-2	significant	STAT5A_-_40440912.23-P1P2	GTGGGGGAGCAGCCGAAGAG	1.0	7.0	empirical	STAT5A_-_40440847.23-P1P2	CTCCGAGGCGTGCCAGGACC	2.0	8.0	empirical	STAT5A_-_40440912.23-P1P2|STAT5A_-_40440847.23-P1P2
GPS1	P1P2	1-2	significant	GPS1_+_80010011.23-P1P2	GTCGCAGCGCGCAGCCACGG	1.0	7.0	empirical	GPS1_-_80009799.23-P1P2	CCCCGCCGCGGCGTGCCGTC	2.0	5.0	empirical	GPS1_+_80010011.23-P1P2|GPS1_-_80009799.23-P1P2
UNC45A	P1	1-2	significant	UNC45A_+_91478755.23-P1	GTGGCCTGTAGAGAGAAAGG	1.0	1.0	empirical	UNC45A_+_91478544.23-P1	CTCCGCGATGACTGTGAGTC	2.0	2.0	empirical	UNC45A_+_91478755.23-P1|UNC45A_+_91478544.23-P1
CPOX	P1P2	1-2	significant	CPOX_-_98312447.23-P1P2	GTTGAGCCGGCGAGCTGCAC	1.0	3.0	empirical	CPOX_+_98312416.23-P1P2	CGGAGTATTGAGCCGGCGAC	2.0	1.0	empirical	CPOX_-_98312447.23-P1P2|CPOX_+_98312416.23-P1P2
CACNB3	P1	1-2	nonessential	CACNB3_+_49212320.23-P1	GCCCGTGCTAGGTGGAAGGT	1.0	1.0	predicted	CACNB3_+_49212331.23-P1	AGCACGGGTTCGTTCCCCTC	2.0	2.0	predicted	CACNB3_+_49212320.23-P1|CACNB3_+_49212331.23-P1
NUTF2	P1P2	1-2	significant	NUTF2_+_67880960.23-P1P2	GGCCGCCCGGGGACTCTCAG	1.0	2.0	empirical	NUTF2_-_67880898.23-P1P2	ACACTCACCCGAGGGGCTGC	2.0	4.0	empirical	NUTF2_+_67880960.23-P1P2|NUTF2_-_67880898.23-P1P2
MED22	P1P2	1-2	essential	MED22_+_136214930.23-P1P2	GGAGGCTGCGGCGGCTGACT	1.0	1.0	essential	MED22_+_136214889.23-P1P2	CCGCAGTCTCTCTTCCCCGC	2.0	3.0	essential	MED22_+_136214930.23-P1P2|MED22_+_136214889.23-P1P2
CCNA2	P1P2	1-2	significant	CCNA2_+_122744606.23-P1P2	GACTGAAGTCCGGGAACCCG	1.0	5.0	empirical	CCNA2_-_122744979.23-P1P2	GCGCCTTTCGCAACCTCCTC	2.0	1.0	empirical	CCNA2_+_122744606.23-P1P2|CCNA2_-_122744979.23-P1P2
CSE1L	P1P2	1-2	essential	CSE1L_-_47662888.23-P1P2	GGTTTGAATGTGAGGCGGAG	1.0	1.0	essential	CSE1L_-_47662891.23-P1P2	CCGCTCCGCCTCACATTCAC	2.0	3.0	essential	CSE1L_-_47662888.23-P1P2|CSE1L_-_47662891.23-P1P2
COX5A	P1P2	1-2	significant	COX5A_+_75230394.23-P1P2	GGCAACCCGCGAGCTTACAC	1.0	1.0	empirical	COX5A_-_75230359.23-P1P2	TCATGCTGGGCGCCGCTCTC	2.0	4.0	empirical	COX5A_+_75230394.23-P1P2|COX5A_-_75230359.23-P1P2
ORC1	P1P2	1-2	significant	ORC1_+_52869923.23-P1P2	GGGCTAGCCGGAGGAAGCTT	1.0	1.0	empirical	ORC1_+_52869878.23-P1P2	CCGAGTCCCTCGCAGCCCGC	2.0	2.0	empirical	ORC1_+_52869923.23-P1P2|ORC1_+_52869878.23-P1P2
DDX18	P1P2	1-2	essential	DDX18_-_118572337.23-P1P2	GCTGTGTGGCGCCTTATTCT	1.0	2.0	essential	DDX18_-_118572348.23-P1P2	AACAAGTGCCTAGAATAAGC	2.0	1.0	essential	DDX18_-_118572337.23-P1P2|DDX18_-_118572348.23-P1P2
NUDT21	P1P2	1-2	essential	NUDT21_+_56485197.23-P1P2	GGCGGGCAGTAGCCGCTGAG	1.0	2.0	essential	NUDT21_-_56485228.23-P1P2	GTTAATGGCGGGCAGTAGCC	2.0	1.0	essential	NUDT21_+_56485197.23-P1P2|NUDT21_-_56485228.23-P1P2
AARS2	P1P2	1-2	significant	AARS2_+_44281027.23-P1P2	GAGTGGCAGCTGCAGCCCGG	1.0	4.0	empirical	AARS2_+_44281044.23-P1P2	CTGACGCTGCCATCGTAGCC	2.0	1.0	empirical	AARS2_+_44281027.23-P1P2|AARS2_+_44281044.23-P1P2
NUP85	P1P2	1-2	essential	NUP85_-_73201818.23-P1P2	GAGGCCTGAGCGGGAAGCAT	1.0	5.0	essential	NUP85_-_73201846.23-P1P2	CAGGCTCCTAGAAGTCGCTC	2.0	6.0	essential	NUP85_-_73201818.23-P1P2|NUP85_-_73201846.23-P1P2
KIAA0947	P1P2	1-2	significant	KIAA0947_+_5422874.23-P1P2	GGTGCACAGAGGTCCCCGTG	1.0	2.0	empirical	KIAA0947_-_5423055.23-P1P2	CCGAATGGGTCTCGCCCGGC	2.0	1.0	empirical	KIAA0947_+_5422874.23-P1P2|KIAA0947_-_5423055.23-P1P2
UPF1	P1P2	1-2	significant	UPF1_+_18942771.23-P1P2	GGCCGCTCGCAGCCTAGAGC	1.0	4.0	empirical	UPF1_-_18942807.23-P1P2	TCGAAGCCGCCAGCCGCTCC	2.0	1.0	empirical	UPF1_+_18942771.23-P1P2|UPF1_-_18942807.23-P1P2
PPP1CB	P1P2	1-2	significant	PPP1CB_+_28975409.23-P1P2	GACGGACGCACAAAGCCCAG	1.0	5.0	empirical	PPP1CB_+_28975374.23-P1P2	CCGGTGACCCGAGGATGGGC	2.0	4.0	empirical	PPP1CB_+_28975409.23-P1P2|PPP1CB_+_28975374.23-P1P2
GAPDH	P2	1-2	significant	GAPDH_-_6647118.23-P2	GTCCTCCACCTTTGACGCTG	1.0	1.0	predicted	GAPDH_-_6647239.23-P2	TTTTTCTGAGCCAGCCACCC	2.0	2.0	predicted	GAPDH_-_6647118.23-P2|GAPDH_-_6647239.23-P2
SSBP3	P1P2	1-2	nonessential	SSBP3_+_54872054.23-P1P2	GGCTCCAAGTAGACCAGCGG	1.0	1.0	predicted	SSBP3_+_54872057.23-P1P2	CTGGTCTACTTGGAGCTCAC	2.0	2.0	predicted	SSBP3_+_54872054.23-P1P2|SSBP3_+_54872057.23-P1P2
CDK2	P1P2	1-2	significant	CDK2_-_56360602.23-P1P2	GTGGCGGTCGGGAACTCGGT	1.0	2.0	empirical	CDK2_+_56360661.23-P1P2	TCCCGACCCGGGGCCACGGC	2.0	3.0	empirical	CDK2_-_56360602.23-P1P2|CDK2_+_56360661.23-P1P2
RPL15	P1P2	1-2	significant	RPL15_+_23959041.23-P1P2	GGCAGGCGGCGTCCCCAAGG	1.0	8.0	empirical	RPL15_+_23958699.23-P1P2	TTGATCGTCTTCCTCTTCAC	2.0	4.0	empirical	RPL15_+_23959041.23-P1P2|RPL15_+_23958699.23-P1P2
LSM11	P1P2	1-2	significant	LSM11_-_157170761.23-P1P2	GCTTGCGGGCCTTTCAAACA	1.0	4.0	empirical	LSM11_-_157170775.23-P1P2	CTCCCGCTCCTCCATGTTTC	2.0	3.0	empirical	LSM11_-_157170761.23-P1P2|LSM11_-_157170775.23-P1P2
TM7SF2	P1P2	1-2	nonessential	TM7SF2_-_64879547.23-P1P2	GGGAGGGCCCCTGGGTAATG	1.0	1.0	predicted	TM7SF2_-_64879615.23-P1P2	CCGCTCTTAGTTCACCCGCC	2.0	2.0	predicted	TM7SF2_-_64879547.23-P1P2|TM7SF2_-_64879615.23-P1P2
DDX54	P2	1-2	significant	DDX54_-_113599205.23-P2	GTAGCTGGGAAACCTCGTTA	1.0	1.0	predicted	DDX54_-_113599226.23-P2	AGGGGCTTCACGCAGCTTCC	2.0	2.0	predicted	DDX54_-_113599205.23-P2|DDX54_-_113599226.23-P2
GRB2	P1	1-2	significant	GRB2_-_73401305.23-P1	GGTGCAAACCCTCCCGATGA	1.0	3.0	empirical	GRB2_+_73401721.23-P1	CCGCCCGGTCGCCGAAGCAC	2.0	3.0	empirical	GRB2_-_73401305.23-P1|GRB2_+_73401721.23-P1
PHF5A	P1P2	1-2	significant	PHF5A_+_41864653.23-P1P2	GCCGGCTTAGTTAGGAGCTA	1.0	1.0	empirical	PHF5A_+_41864661.23-P1P2	AACTAAGCCGGCCACCGGAC	2.0	3.0	empirical	PHF5A_+_41864653.23-P1P2|PHF5A_+_41864661.23-P1P2
RBX1	P1P2	1-2	significant	RBX1_-_41347436.23-P1P2	GTGGATGTGGATACCCCGAG	1.0	1.0	empirical	RBX1_+_41347427.23-P1P2	CGAGCGGCACCAACAGCGGC	2.0	2.0	empirical	RBX1_-_41347436.23-P1P2|RBX1_+_41347427.23-P1P2
SUPT4H1	P1P2	1-2	nonessential	SUPT4H1_-_56429520.23-P1P2	GCGCCGATGGGAAGAACAAC	1.0	1.0	predicted	SUPT4H1_-_56429477.23-P1P2	AAGGACCTGCGGCATCTGCC	2.0	2.0	predicted	SUPT4H1_-_56429520.23-P1P2|SUPT4H1_-_56429477.23-P1P2
WDR61	P1P2	1-2	significant	WDR61_+_78591885.23-P1P2	GAGTGGTGAGTTGGAGCGCA	1.0	1.0	empirical	WDR61_-_78591737.23-P1P2	TGGCTGTTCCTCGGTGTACC	2.0	2.0	empirical	WDR61_+_78591885.23-P1P2|WDR61_-_78591737.23-P1P2
UBE2L3	P1P2	1-2	significant	UBE2L3_-_21922010.23-P1P2	GCCGGCCGCGATGCATTCTG	1.0	1.0	empirical	UBE2L3_-_21922123.23-P1P2	CGGGGATCCGGAGCCTAGGC	2.0	4.0	empirical	UBE2L3_-_21922010.23-P1P2|UBE2L3_-_21922123.23-P1P2
OR2T5	ENST00000366473.2	1-2	nonessential	OR2T5_-_248651931.23-ENST00000366473.2	GGCCAACCACACTGGAAAGT	1.0	1.0	predicted	OR2T5_+_248651939.23-ENST00000366473.2	CATGGGACTCTTCAGACGAC	2.0	2.0	predicted	OR2T5_-_248651931.23-ENST00000366473.2|OR2T5_+_248651939.23-ENST00000366473.2
LIN52	P1P2	1-2	essential	LIN52_-_74551706.23-P1P2	GTCCCACAGACGGTAAGAGC	1.0	1.0	essential	LIN52_+_74551686.23-P1P2	ACAGACGGTAAGAGCCGGCC	2.0	4.0	essential	LIN52_-_74551706.23-P1P2|LIN52_+_74551686.23-P1P2
RBM42	P1P2	1-2	significant	RBM42_-_36120011.23-P1P2	GACAGCAGAACCAGCGGCGG	1.0	4.0	empirical	RBM42_-_36120005.23-P1P2	CTGGTTCTGCTGTCTACTCC	2.0	3.0	empirical	RBM42_-_36120011.23-P1P2|RBM42_-_36120005.23-P1P2
CHMP1A	P1P2	1-2	significant	CHMP1A_+_89723672.23-P1P2	GGGGCCTAGACCACCAACCC	1.0	10.0	empirical	CHMP1A_-_89724068.23-P1P2	CCGGGACCTGACACCGCCCC	2.0	4.0	empirical	CHMP1A_+_89723672.23-P1P2|CHMP1A_-_89724068.23-P1P2
CCDC130	P2	1-2	nonessential	CCDC130_+_13842618.23-P2	GCCCAGCTCGGCGAGGACCC	1.0	1.0	predicted	CCDC130_-_13842623.23-P2	TGGAAGCGGGTTCAGCCTTC	2.0	2.0	predicted	CCDC130_+_13842618.23-P2|CCDC130_-_13842623.23-P2
LRRC37A3	P1P2	1-2	nonessential	LRRC37A3_+_62915581.23-P1P2	GCGTGACCGCGCTCCGGTAA	1.0	1.0	predicted	LRRC37A3_-_62915391.23-P1P2	CCTCGGTTCCAACATGAGGC	2.0	2.0	predicted	LRRC37A3_+_62915581.23-P1P2|LRRC37A3_-_62915391.23-P1P2
MZT1	P1P2	1-2	essential	MZT1_-_73301757.23-P1P2	GCCATGGCTAAGGCCGAGGG	1.0	3.0	essential	MZT1_-_73301754.23-P1P2	TCGGCCTTAGCCATGGCGAC	2.0	7.0	essential	MZT1_-_73301757.23-P1P2|MZT1_-_73301754.23-P1P2
CPSF3	P1P2	1-2	significant	CPSF3_+_9564024.23-P1P2	GGTGGGAGCGCGGGCGACGG	1.0	7.0	empirical	CPSF3_+_9563875.23-P1P2	CCGCTTCGCCCTCACACTTC	2.0	3.0	empirical	CPSF3_+_9564024.23-P1P2|CPSF3_+_9563875.23-P1P2
BANF1	P1P2	1-2	significant	BANF1_+_65770320.23-P1P2	GGGCGTGGAAAGCTAACCAA	1.0	7.0	empirical	BANF1_-_65770396.23-P1P2	TCTGTGACCTTGGCTGAACC	2.0	3.0	empirical	BANF1_+_65770320.23-P1P2|BANF1_-_65770396.23-P1P2
ATF4	P1P2	1-2	significant	ATF4_-_39916548.23-P1P2	GGACGAAGTCTATAAAGGGC	1.0	1.0	empirical	ATF4_-_39917038.23-P1P2	CGTTTCGTGGGGCAACAGCC	2.0	3.0	empirical	ATF4_-_39916548.23-P1P2|ATF4_-_39917038.23-P1P2
POP7	P1P2	1-2	significant	POP7_+_100303782.23-P1P2	GAAGCAGCCAGCCAGCTCGT	1.0	3.0	empirical	POP7_-_100303773.23-P1P2	CGCCGGGGTCCTGAACGGGC	2.0	1.0	empirical	POP7_+_100303782.23-P1P2|POP7_-_100303773.23-P1P2
PPP1CA	P1	1-2	significant	PPP1CA_+_67168941.23-P1	GTGGGGCGAGGGAGAAACCC	1.0	5.0	empirical	PPP1CA_+_67168772.23-P1	CTCCTTGCCCACAGGCAGCC	2.0	8.0	empirical	PPP1CA_+_67168941.23-P1|PPP1CA_+_67168772.23-P1
RAC1	P1P2	1-2	nonessential	RAC1_+_6414690.23-P1P2	GCTACGAGCGCTCCCGAGGA	1.0	1.0	predicted	RAC1_-_6414149.23-P1P2	CTCCACTCACATCCGGCCTC	2.0	2.0	predicted	RAC1_+_6414690.23-P1P2|RAC1_-_6414149.23-P1P2
SPDYE2	ENST00000432940.1,ENST00000507918.1	1-2	nonessential	SPDYE2_+_102191744.23-ENST00000432940.1,ENST00000507918.1	GTGGTTTGATGGAGGAATAG	1.0	1.0	predicted	SPDYE2_+_102191690.23-ENST00000432940.1,ENST00000507918.1	CAGATCTGGGCCCAGGACTC	2.0	2.0	predicted	SPDYE2_+_102191744.23-ENST00000432940.1,ENST00000507918.1|SPDYE2_+_102191690.23-ENST00000432940.1,ENST00000507918.1
PNN	P1P2	1-2	significant	PNN_-_39644446.23-P1P2	GGGCGCGGCATAGCCCGGCT	1.0	1.0	empirical	PNN_-_39644486.23-P1P2	TCTTCTCCCTGCGGCAGGCC	2.0	2.0	empirical	PNN_-_39644446.23-P1P2|PNN_-_39644486.23-P1P2
LRPPRC	P1P2	1-2	essential	LRPPRC_+_44223082.23-P1P2	GTGCGGGGACGTTCGAGCAA	1.0	4.0	essential	LRPPRC_-_44223078.23-P1P2	TGCTGAGATCCGCGCGTTGC	2.0	3.0	essential	LRPPRC_+_44223082.23-P1P2|LRPPRC_-_44223078.23-P1P2
ZNF687	P1P2	1-2	significant	ZNF687_-_151254788.23-P1P2	GGAGAAGCAGGAAGTAGCGG	1.0	2.0	empirical	ZNF687_+_151255019.23-P1P2	TCCATTGGGGCGGATGGGCC	2.0	1.0	empirical	ZNF687_-_151254788.23-P1P2|ZNF687_+_151255019.23-P1P2
ISG20L2	P1P2	1-2	significant	ISG20L2_+_156698201.23-P1P2	GCTGGACCCGTCTGGGAGGT	1.0	2.0	empirical	ISG20L2_-_156698173.23-P1P2	CGGGGATCCGAAGTATGCTC	2.0	4.0	empirical	ISG20L2_+_156698201.23-P1P2|ISG20L2_-_156698173.23-P1P2
ZC3H18	P1P2	1-2	significant	ZC3H18_+_88636860.23-P1P2	GCTGGCTCCAGGCTCGACAC	1.0	3.0	empirical	ZC3H18_+_88636857.23-P1P2	CCCGTGTCGAGCCTGGAGCC	2.0	1.0	empirical	ZC3H18_+_88636860.23-P1P2|ZC3H18_+_88636857.23-P1P2
EFTUD2	P1P2	1-2	essential	EFTUD2_+_42976772.23-P1P2	GGGGGCGGAAGCACGATCTC	1.0	2.0	essential	EFTUD2_+_42976714.23-P1P2	CTGACCCGCTTCAACTTACC	2.0	3.0	essential	EFTUD2_+_42976772.23-P1P2|EFTUD2_+_42976714.23-P1P2
GTF2A2	P1P2	1-2	significant	GTF2A2_+_59949667.23-P1P2	GGAGAGGTGGTCGGAGAAGT	1.0	3.0	empirical	GTF2A2_+_59949653.23-P1P2	GGCAGGAGGTTCCTACTTCC	2.0	7.0	empirical	GTF2A2_+_59949667.23-P1P2|GTF2A2_+_59949653.23-P1P2
OSGEP	P1P2	1-2	significant	OSGEP_-_20922986.23-P1P2	GAGCACTGGGAAAGACACCG	1.0	7.0	empirical	OSGEP_-_20922972.23-P1P2	GTGCTATCTGCAGGCTGGCC	2.0	4.0	empirical	OSGEP_-_20922986.23-P1P2|OSGEP_-_20922972.23-P1P2
H3F3A	P1P2	1-2	nonessential	H3F3A_+_226250768.23-P1P2	GACCGAAGAAAGAGGAGCCA	2.0	2.0	predicted	H3F3A_+_226250520.23-P1P2	CGTCTGCCCGCTTCCCCGGC	3.0	3.0	predicted	H3F3A_+_226250768.23-P1P2|H3F3A_+_226250520.23-P1P2
NUP62	P1P2	1-2	essential	NUP62_+_50432696.23-P1P2	GAGGGCCACGAGCTGCGAAA	1.0	2.0	essential	NUP62_-_50432220.23-P1P2	GGGTCTGGTTTCCTCCTCCC	2.0	10.0	essential	NUP62_+_50432696.23-P1P2|NUP62_-_50432220.23-P1P2
COA5	P1P2	1-2	significant	COA5_+_99224923.23-P1P2	GGCCTCGCTCGCTCCCGACC	1.0	1.0	empirical	COA5_+_99224908.23-P1P2	CAACACTTGCAACCGGGTCC	2.0	2.0	empirical	COA5_+_99224923.23-P1P2|COA5_+_99224908.23-P1P2
CDC23	P1P2	1-2	essential	CDC23_-_137548987.23-P1P2	GACAGCCACCGGGACCATGG	1.0	3.0	essential	CDC23_+_137548970.23-P1P2	CCGGGACCATGGAGGTACTC	2.0	4.0	essential	CDC23_-_137548987.23-P1P2|CDC23_+_137548970.23-P1P2
MRPS26	P1P2	1-2	significant	MRPS26_+_3026693.23-P1P2	GTGGCCGAGTCTCCTCACTG	1.0	2.0	empirical	MRPS26_+_3026905.23-P1P2	GACCGTGCGCGCCCTCAGGC	2.0	6.0	empirical	MRPS26_+_3026693.23-P1P2|MRPS26_+_3026905.23-P1P2
RNASEH2C	P1P2	1-2	significant	RNASEH2C_+_65488232.23-P1P2	GGCCCTGGCGTCGCGTAGGA	1.0	5.0	empirical	RNASEH2C_+_65488225.23-P1P2	TCCTCCCTCCTACGCGACGC	2.0	3.0	empirical	RNASEH2C_+_65488232.23-P1P2|RNASEH2C_+_65488225.23-P1P2
OGFOD1	P1P2	1-2	significant	OGFOD1_-_56485723.23-P1P2	GGCCGCCACGCAGAGGTCTA	1.0	5.0	empirical	OGFOD1_+_56485469.23-P1P2	CAGGAAGGTAGCGTCTTGAC	2.0	1.0	empirical	OGFOD1_-_56485723.23-P1P2|OGFOD1_+_56485469.23-P1P2
PSMC2	P1P2	1-2	essential	PSMC2_-_102988137.23-P1P2	GCTGTGTAATCATTAAGGAG	1.0	4.0	essential	PSMC2_-_102988132.23-P1P2	TAATGATTACACAGCACCTC	2.0	1.0	essential	PSMC2_-_102988137.23-P1P2|PSMC2_-_102988132.23-P1P2
ACIN1	P2	1-2	significant	ACIN1_-_23540292.23-P2	GAGGAAGACGAAGGGAGCTA	1.0	3.0	empirical	ACIN1_-_23540730.23-P2	CTCCGCCAATACAATAGAGC	2.0	3.0	empirical	ACIN1_-_23540292.23-P2|ACIN1_-_23540730.23-P2
ZCRB1	P1P2	1-2	significant	ZCRB1_+_42719871.23-P1P2	GCAGTCGGGAAGAAGCACCG	1.0	2.0	empirical	ZCRB1_-_42719876.23-P1P2	TGGCTGCTATTATCTGCTCC	2.0	1.0	empirical	ZCRB1_+_42719871.23-P1P2|ZCRB1_-_42719876.23-P1P2
ANAPC1	P1P2	1-2	significant	ANAPC1_-_112641691.23-P1P2	GGAAGAACGGGCAACAGCAG	1.0	2.0	empirical	ANAPC1_-_112641707.23-P1P2	TTAGCACTCGAGCCCGCTGC	2.0	1.0	empirical	ANAPC1_-_112641691.23-P1P2|ANAPC1_-_112641707.23-P1P2
UQCRC1	P1	1-2	significant	UQCRC1_+_48647028.23-P1	GGCGGCGTCCGTGGTCTGTC	1.0	5.0	empirical	UQCRC1_-_48647042.23-P1	TGGTCTGTCGGGCCGCTACC	2.0	2.0	empirical	UQCRC1_+_48647028.23-P1|UQCRC1_-_48647042.23-P1
TAF1D	P1	1-2	significant	TAF1D_-_93474665.23-P1	GCCGTGCGGAAGAAAAGGGT	1.0	6.0	empirical	TAF1D_+_93474608.23-P1	TCCAACTCCCGATAACCAGC	2.0	2.0	empirical	TAF1D_-_93474665.23-P1|TAF1D_+_93474608.23-P1
RAB18	P1P2	1-2	significant	RAB18_-_27793285.23-P1P2	GCGGCCAGCTGGGCTCGGAG	1.0	2.0	empirical	RAB18_-_27793292.23-P1P2	CGTTCCGCTCCGAGCCCAGC	2.0	3.0	empirical	RAB18_-_27793285.23-P1P2|RAB18_-_27793292.23-P1P2
CENPH	P1P2	1-2	significant	CENPH_-_68485438.23-P1P2	GAGCGCGTTTGCCTGTTGAG	1.0	3.0	empirical	CENPH_+_68485427.23-P1P2	GTTGAGTGGTAGCCTTTCCC	2.0	6.0	empirical	CENPH_-_68485438.23-P1P2|CENPH_+_68485427.23-P1P2
UQCRQ	P1P2	1-2	significant	UQCRQ_-_132202364.23-P1P2	GACCGGATCGGTGACTGTGG	1.0	1.0	empirical	UQCRQ_+_132202565.23-P1P2	CCACAATGGGCCGCGAGTTC	2.0	5.0	empirical	UQCRQ_-_132202364.23-P1P2|UQCRQ_+_132202565.23-P1P2
CSH2	P1	1-2	nonessential	CSH2_+_61950403.23-P1	GAATGCAGGCAGATGAGCAT	1.0	1.0	predicted	CSH2_+_61950460.23-P1	CCCATTACTTCCCCAGTGGC	2.0	2.0	predicted	CSH2_+_61950403.23-P1|CSH2_+_61950460.23-P1
PPP1R10	P1P2	1-2	significant	PPP1R10_-_30584296.23-P1P2	GCAGCACCTCGGGCTCAGGG	1.0	7.0	empirical	PPP1R10_-_30585037.23-P1P2	GAGCGGGCGGCCGCCATTCC	2.0	2.0	empirical	PPP1R10_-_30584296.23-P1P2|PPP1R10_-_30585037.23-P1P2
NAA38	P1P2	1-2	essential	NAA38_+_117824200.23-P1P2	GGAAAGGGCGCGCCAGAACC	1.0	1.0	essential	NAA38_-_117824411.23-P1P2	CAGGATCCCGCCGAGGCCAC	2.0	4.0	essential	NAA38_+_117824200.23-P1P2|NAA38_-_117824411.23-P1P2
MBTPS1	P1P2	1-2	significant	MBTPS1_-_84150406.23-P1P2	GCTCCGCGGCGAACACGCCT	1.0	1.0	empirical	MBTPS1_-_84150360.23-P1P2	TGAGCTCCCGGCGGCGCAGC	2.0	5.0	empirical	MBTPS1_-_84150406.23-P1P2|MBTPS1_-_84150360.23-P1P2
ELL	P1P2	1-2	significant	ELL_+_18632858.23-P1P2	GAGAGATGGTCGCAAGATGG	1.0	1.0	empirical	ELL_+_18632806.23-P1P2	TCGCTAACCCGCCCGCACGC	2.0	4.0	empirical	ELL_+_18632858.23-P1P2|ELL_+_18632806.23-P1P2
NIP7	P1P2	1-2	essential	NIP7_-_69373724.23-P1P2	GGGATCCGGTGTTCCAACCC	1.0	5.0	essential	NIP7_-_69373710.23-P1P2	GATCCTCGTGCCTTGGTAAC	2.0	4.0	essential	NIP7_-_69373724.23-P1P2|NIP7_-_69373710.23-P1P2
SCD	P1P2	1-2	significant	SCD_-_102107036.23-P1P2	GCTTGGCAGCGGATAAAAGG	1.0	1.0	empirical	SCD_-_102107388.23-P1P2	CCGCGGAGCTCTCCCCTCTC	2.0	3.0	empirical	SCD_-_102107036.23-P1P2|SCD_-_102107388.23-P1P2
CDK1	P1P2	1-2	essential	CDK1_-_62538284.23-P1P2	GAATTGAGCGGAGAGCGACG	1.0	3.0	essential	CDK1_+_62538309.23-P1P2	CGGAATAATAAGCCGGGTAC	2.0	1.0	essential	CDK1_-_62538284.23-P1P2|CDK1_+_62538309.23-P1P2
MED20	P1P2	1-2	significant	MED20_+_41888837.23-P1P2	GCTGAGACAGAAGGTTGTGT	1.0	4.0	empirical	MED20_+_41888805.23-P1P2	TGTCCGCCCACAGAAACTCC	2.0	3.0	empirical	MED20_+_41888837.23-P1P2|MED20_+_41888805.23-P1P2
ARMC7	P1P2	1-2	significant	ARMC7_+_73106080.23-P1P2	GGGCACTGGCGCACCGTCCC	1.0	5.0	empirical	ARMC7_-_73106057.23-P1P2	GGCGGAAGCCGCGCTGTCCC	2.0	1.0	empirical	ARMC7_+_73106080.23-P1P2|ARMC7_-_73106057.23-P1P2
NUBP1	P1P2	1-2	essential	NUBP1_-_10837726.23-P1P2	GGGCAAAGGCGACGGAATGG	1.0	2.0	essential	NUBP1_-_10837703.23-P1P2	TCGTGGTCACCGGAACCCGC	2.0	1.0	essential	NUBP1_-_10837726.23-P1P2|NUBP1_-_10837703.23-P1P2
MINOS1	P1P2	1-2	essential	MINOS1_-_19923558.23-P1P2	GACATGTCTGAGTCGGAGCT	1.0	10.0	essential	MINOS1_+_19923571.23-P1P2	GTGTCTGGCGGATGCGGTCC	2.0	5.0	essential	MINOS1_-_19923558.23-P1P2|MINOS1_+_19923571.23-P1P2
RPL24	P1P2	1-2	essential	RPL24_-_101405503.23-P1P2	GGTAAGCGGATTGGGAACCA	1.0	1.0	essential	RPL24_+_101405498.23-P1P2	CGGGTCGTGCTTACTTCATC	2.0	3.0	essential	RPL24_-_101405503.23-P1P2|RPL24_+_101405498.23-P1P2
BMS1	P1P2	1-2	essential	BMS1_+_43278253.23-P1P2	GCTCGCAGCCGCGACTCCTC	1.0	8.0	essential	BMS1_-_43278259.23-P1P2	CAGGTCAGCATGGACACCGC	2.0	1.0	essential	BMS1_+_43278253.23-P1P2|BMS1_-_43278259.23-P1P2
RPL37	P1P2	1-2	significant	RPL37_-_40835245.23-P1P2	GCAGAGAGGCACAAAGGACG	1.0	4.0	empirical	RPL37_-_40835249.23-P1P2	TCCTCGTCCTTTGTGCCTCC	2.0	1.0	empirical	RPL37_-_40835245.23-P1P2|RPL37_-_40835249.23-P1P2
CRCP	P1P2	1-2	significant	CRCP_-_65580060.23-P1P2	GGACTGGGCGACCCTCGTAC	1.0	7.0	empirical	CRCP_-_65580068.23-P1P2	TCACTCCCGTACGAGGGTCC	2.0	3.0	empirical	CRCP_-_65580060.23-P1P2|CRCP_-_65580068.23-P1P2
MRPS27	P1P2	1-2	essential	MRPS27_+_71616011.23-P1P2	GGTGCGGCGCGGGATGCTCC	1.0	6.0	essential	MRPS27_-_71615981.23-P1P2	GCAGGTTGGCCGGACAGCTC	2.0	2.0	essential	MRPS27_+_71616011.23-P1P2|MRPS27_-_71615981.23-P1P2
PSTK	P1	1-2	significant	PSTK_+_124739974.23-P1	GTGCTGCCCGGGGAGACCGG	1.0	1.0	empirical	PSTK_-_124739917.23-P1	CCGCCTACCGGCGCAGTGGC	2.0	6.0	empirical	PSTK_+_124739974.23-P1|PSTK_-_124739917.23-P1
CCNB1	P1P2	1-2	significant	CCNB1_-_68463002.23-P1P2	GGCTGCGGCGGAACGGCTGT	1.0	1.0	empirical	CCNB1_+_68463036.23-P1P2	CCGGTGTTCTGCTTCTCCCC	2.0	4.0	empirical	CCNB1_-_68463002.23-P1P2|CCNB1_+_68463036.23-P1P2
TIGD1	P1P2	1-2	nonessential	TIGD1_-_233415185.23-P1P2	GGGCCAGGACACGCTCCCTT	1.0	1.0	predicted	TIGD1_-_233415192.23-P1P2	CTCTCCTAAGGGAGCGTGTC	2.0	2.0	predicted	TIGD1_-_233415185.23-P1P2|TIGD1_-_233415192.23-P1P2
HAUS6	P1P2	1-2	significant	HAUS6_+_19102512.23-P1P2	GCGCACCTCGGAGTGTAAGG	1.0	5.0	empirical	HAUS6_-_19102902.23-P1P2	TAAGGGCGGGAGTCTCGGTC	2.0	5.0	empirical	HAUS6_+_19102512.23-P1P2|HAUS6_-_19102902.23-P1P2
SDC1	P1P2	1-2	significant	SDC1_+_20424403.23-P1P2	GACGGTGAGCCCCGAGACCA	1.0	3.0	empirical	SDC1_+_20424790.23-P1P2	GATTCCTCTCCGCTCGGCTC	2.0	1.0	empirical	SDC1_+_20424403.23-P1P2|SDC1_+_20424790.23-P1P2
RBMXL1	P1P2	1-2	nonessential	RBMXL1_-_89458434.23-P1P2	GTAGGCCAGGATCTCTAGGC	1.0	1.0	predicted	RBMXL1_-_89458380.23-P1P2	AGAGTCAATCCCTGTCCCGC	2.0	2.0	predicted	RBMXL1_-_89458434.23-P1P2|RBMXL1_-_89458380.23-P1P2
LAMTOR2	P1P2	1-2	significant	LAMTOR2_-_156024614.23-P1P2	GACGGGACTACGGGAAGCAG	1.0	5.0	empirical	LAMTOR2_-_156024648.23-P1P2	GATCTCCGAGGTGCCTCCCC	2.0	2.0	empirical	LAMTOR2_-_156024614.23-P1P2|LAMTOR2_-_156024648.23-P1P2
PCF11	P1P2	1-2	significant	PCF11_-_82868415.23-P1P2	GAGAGGAAGAGGAGTCGGAA	1.0	3.0	empirical	PCF11_-_82868190.23-P1P2	AACCGCTGCGTCGTGCGAAC	2.0	6.0	empirical	PCF11_-_82868415.23-P1P2|PCF11_-_82868190.23-P1P2
POP4	P1P2	1-2	significant	POP4_-_30097259.23-P1P2	GGGGGCCGCGAAGTTGGAGA	1.0	5.0	empirical	POP4_-_30097239.23-P1P2	CTTACTCTTCATTCTCGGAC	2.0	8.0	empirical	POP4_-_30097259.23-P1P2|POP4_-_30097239.23-P1P2
ACIN1	P1	1-2	significant	ACIN1_-_23564284.23-P1	GTCACCCGCAGCGCCTGAAG	1.0	2.0	empirical	ACIN1_+_23563962.23-P1	TCCCATTTGGGCTCGCGCTC	2.0	6.0	empirical	ACIN1_-_23564284.23-P1|ACIN1_+_23563962.23-P1
KAT8	P2	1-2	significant	KAT8_+_31141409.23-P2	GTCAGGATGTAAAAGACGAA	1.0	1.0	predicted	KAT8_+_31141331.23-P2	TAGATTTACTGTCAGAACCC	2.0	2.0	predicted	KAT8_+_31141409.23-P2|KAT8_+_31141331.23-P2
FASTKD5	P1P2	1-2	significant	FASTKD5_+_3140485.23-P1P2	GTGAGGCTCGGAGTCGCCGG	1.0	1.0	empirical	FASTKD5_-_3140461.23-P1P2	GCGGCGTCCCCGGTTTGGTC	2.0	7.0	empirical	FASTKD5_+_3140485.23-P1P2|FASTKD5_-_3140461.23-P1P2
CHTOP	P1P2	1-2	significant	CHTOP_-_153606538.23-P1P2	GTAGCCGGTCAGACAAGCAC	1.0	4.0	empirical	CHTOP_-_153606547.23-P1P2	CCACGTCCAGTGCTTGTCTC	2.0	3.0	empirical	CHTOP_-_153606538.23-P1P2|CHTOP_-_153606547.23-P1P2
MCM6	P1P2	1-2	essential	MCM6_+_136633947.23-P1P2	GCGTGGCGCAGGCGAATCCT	1.0	2.0	essential	MCM6_+_136633964.23-P1P2	CGCTCGACCGCCACAAGTCC	2.0	1.0	essential	MCM6_+_136633947.23-P1P2|MCM6_+_136633964.23-P1P2
ZBTB17	P1P2	1-2	significant	ZBTB17_-_16302540.23-P1P2	GGCCGCGAGAAGGCCGGGGA	1.0	2.0	empirical	ZBTB17_-_16302519.23-P1P2	TGATGCACCTCCCTCTGCGC	2.0	3.0	empirical	ZBTB17_-_16302540.23-P1P2|ZBTB17_-_16302519.23-P1P2
GRWD1	P1P2	1-2	significant	GRWD1_-_48949282.23-P1P2	GGATGGCGGCGCGCAAGGGT	1.0	1.0	empirical	GRWD1_-_48949265.23-P1P2	TCTTCGAACCCTCTCGCTGC	2.0	4.0	empirical	GRWD1_-_48949282.23-P1P2|GRWD1_-_48949265.23-P1P2
SKA3	P1P2	1-2	significant	SKA3_-_21750609.23-P1P2	GTCCCGCAGAAGCTCCGGAT	1.0	3.0	empirical	SKA3_+_21750674.23-P1P2	CCCGCCACTAGTTTGAATCC	2.0	5.0	empirical	SKA3_-_21750609.23-P1P2|SKA3_+_21750674.23-P1P2
MTG2	P1P2	1-2	nonessential	MTG2_+_60758110.23-P1P2	GTCCCCGCTCCCGCACTCAC	1.0	1.0	predicted	MTG2_+_60758146.23-P1P2	GGGGGGTGGTCGCGGCCCGC	2.0	2.0	predicted	MTG2_+_60758110.23-P1P2|MTG2_+_60758146.23-P1P2
NUBP2	P1P2	1-2	significant	NUBP2_-_1833059.23-P1P2	GTGAGTGGCGGGCCAGGGTG	1.0	8.0	empirical	NUBP2_-_1832989.23-P1P2	CTTACGCCCGCGGGCCGTCC	2.0	2.0	empirical	NUBP2_-_1833059.23-P1P2|NUBP2_-_1832989.23-P1P2
CLNS1A	P1P2	1-2	essential	CLNS1A_-_77348773.23-P1P2	GAGCTCATAGCAGCAGAGTG	1.0	1.0	essential	CLNS1A_-_77348782.23-P1P2	GTGTTGCCGCACTCTGCTGC	2.0	3.0	essential	CLNS1A_-_77348773.23-P1P2|CLNS1A_-_77348782.23-P1P2
ANKRD11	P1P2	1-2	significant	ANKRD11_+_89556932.23-P1P2	GACGGTGCGCGATGGACCGA	1.0	4.0	empirical	ANKRD11_-_89556765.23-P1P2	CCGCCTTGCCGCTCGGGCCC	2.0	1.0	empirical	ANKRD11_+_89556932.23-P1P2|ANKRD11_-_89556765.23-P1P2
CCDC137	P1P2	1-2	significant	CCDC137_-_79633788.23-P1P2	GGCTTCGCTAGGGAGCCTCC	1.0	5.0	empirical	CCDC137_-_79633802.23-P1P2	CCATCTCCACGCCGGGAGGC	2.0	2.0	empirical	CCDC137_-_79633788.23-P1P2|CCDC137_-_79633802.23-P1P2
ZNHIT2	P1P2	1-2	significant	ZNHIT2_-_64885059.23-P1P2	GGTAGGGCGCATTACAGCGA	1.0	3.0	empirical	ZNHIT2_-_64885126.23-P1P2	TGGAGCCGGCCGGGCCCTGC	2.0	2.0	empirical	ZNHIT2_-_64885059.23-P1P2|ZNHIT2_-_64885126.23-P1P2
TAF2	P1P2	1-2	essential	TAF2_-_120844853.23-P1P2	GGGCTTCCTAGGGGGATACG	1.0	6.0	essential	TAF2_-_120845040.23-P1P2	TTGCGGAGAGGAGCATCTCC	2.0	3.0	essential	TAF2_-_120844853.23-P1P2|TAF2_-_120845040.23-P1P2
FAM207A	P1P2	1-2	nonessential	FAM207A_-_46359977.23-P1P2	GGTGCTCCGCCGGGAAGATG	1.0	1.0	predicted	FAM207A_-_46359938.23-P1P2	CCCGGAAGCTGGTCCTGCGC	2.0	2.0	predicted	FAM207A_-_46359977.23-P1P2|FAM207A_-_46359938.23-P1P2
UTP6	P1P2	1-2	essential	UTP6_-_30228710.23-P1P2	GAACACGAGCAGGAAGCTCC	1.0	4.0	essential	UTP6_-_30228722.23-P1P2	AACCTGAAACCGGGAGCTTC	2.0	3.0	essential	UTP6_-_30228710.23-P1P2|UTP6_-_30228722.23-P1P2
HIST2H2BE	P1P2	1-2	nonessential	HIST2H2BE_-_149858212.23-P1P2	GGTAAGACACAGTACAAACG	1.0	1.0	predicted	HIST2H2BE_+_149858162.23-P1P2	GAGCGGATTTTGCCGGTTCC	2.0	2.0	predicted	HIST2H2BE_-_149858212.23-P1P2|HIST2H2BE_+_149858162.23-P1P2
YJEFN3	P2	1-2	significant	YJEFN3_-_19639774.23-P2	GGCCGGCCCAGACCCGTCGG	1.0	1.0	predicted	YJEFN3_-_19639771.23-P2	ACGGGTCTGGGCCGGCTGCC	2.0	2.0	predicted	YJEFN3_-_19639774.23-P2|YJEFN3_-_19639771.23-P2
EEF1G	P1P2	1-2	significant	EEF1G_+_62341280.23-P1P2	GGTAAGTTTGCTGGCTCTGG	1.0	1.0	empirical	EEF1G_-_62341383.23-P1P2	TTCTCTCCCGGGCGGCTTAC	2.0	3.0	empirical	EEF1G_+_62341280.23-P1P2|EEF1G_-_62341383.23-P1P2
HSPA14	P1P2	1-2	significant	HSPA14_-_14880699.23-P1P2	GGTAGACGCGCGGGGTCCCA	1.0	8.0	empirical	HSPA14_-_14880317.23-P1P2	CGGAGCTTCACGTTCCCGCC	2.0	1.0	empirical	HSPA14_-_14880699.23-P1P2|HSPA14_-_14880317.23-P1P2
SEC61A1	P2	1-2	essential	SEC61A1_+_127783820.23-P2	GCGATGAGATTCATGAGGTT	1.0	1.0	predicted	SEC61A1_+_127783788.23-P2	TTCGGGAGGCGTTCTACCGC	2.0	2.0	predicted	SEC61A1_+_127783820.23-P2|SEC61A1_+_127783788.23-P2
IARS	P1P2	1-2	significant	IARS_+_95055891.23-P1P2	GCAGGCACGCGAGGCCCCTC	1.0	4.0	empirical	IARS_-_95055898.23-P1P2	TCAGGTACGCCCTCTCTTCC	2.0	1.0	empirical	IARS_+_95055891.23-P1P2|IARS_-_95055898.23-P1P2
CWF19L2	P1P2	1-2	essential	CWF19L2_+_107328479.23-P1P2	GTGCGAAGAGTATCGAAGAG	1.0	6.0	essential	CWF19L2_+_107328464.23-P1P2	GGTCTGTTCTTTCCGCTCTC	2.0	1.0	essential	CWF19L2_+_107328479.23-P1P2|CWF19L2_+_107328464.23-P1P2
EIF4G2	P2	1-2	essential	EIF4G2_-_10828931.23-P2	GACAGGAGAAATGAAATACC	1.0	6.0	empirical	EIF4G2_+_10828816.23-P2	CCTTCTGCAATCGCACTCTC	2.0	2.0	empirical	EIF4G2_-_10828931.23-P2|EIF4G2_+_10828816.23-P2
COPG1	P2	1-2	significant	COPG1_-_128984635.23-P2	GAGCATGAGGAGGTCCGGGC	1.0	1.0	predicted	COPG1_-_128984639.23-P2	ACCTGCCCGGACCTCCTCAC	2.0	2.0	predicted	COPG1_-_128984635.23-P2|COPG1_-_128984639.23-P2
POTEI	ENST00000451531.2	1-2	significant	POTEI_-_131267022.23-ENST00000451531.2	GGCCCACGCCCACCCGAGGA	1.0	3.0	empirical	POTEI_+_131267148.23-ENST00000451531.2	AGGAGGAACACCAGGCCAAC	1.0	1.0	predicted	POTEI_-_131267022.23-ENST00000451531.2|POTEI_+_131267148.23-ENST00000451531.2
TAF5	P1P2	1-2	significant	TAF5_-_105127776.23-P1P2	GCTGGCGGAGGAGCAGACGG	1.0	1.0	empirical	TAF5_+_105127794.23-P1P2	GAGGGACCGCCAACGCTGCC	2.0	3.0	empirical	TAF5_-_105127776.23-P1P2|TAF5_+_105127794.23-P1P2
SPDL1	P1P2	1-2	essential	SPDL1_+_169010824.23-P1P2	GGCTCAGGGCGTCCACATTG	1.0	1.0	essential	SPDL1_-_169010834.23-P1P2	CATTGAGGACGCTAACTCCC	2.0	2.0	essential	SPDL1_+_169010824.23-P1P2|SPDL1_-_169010834.23-P1P2
TRAIP	P1P2	1-2	significant	TRAIP_+_49893983.23-P1P2	GGCTCCAGGAAGTCGTGCTG	1.0	5.0	empirical	TRAIP_-_49893903.23-P1P2	TTGAGTCCAGCCATCATGCC	2.0	2.0	empirical	TRAIP_+_49893983.23-P1P2|TRAIP_-_49893903.23-P1P2
ZC3H8	P1P2	1-2	essential	ZC3H8_+_113012608.23-P1P2	GTCCGGGTTGTCACTCTCTC	1.0	1.0	essential	ZC3H8_-_113012642.23-P1P2	TCTCGTCGCGTCCGGGTTGC	2.0	2.0	essential	ZC3H8_+_113012608.23-P1P2|ZC3H8_-_113012642.23-P1P2
NOL12	P1P2	1-2	significant	NOL12_+_38082332.23-P1P2	GGTAGCGTACTCATCCTCCC	1.0	1.0	empirical	NOL12_+_38082661.23-P1P2	TTCTTGACCTCCCCACCTCC	2.0	6.0	empirical	NOL12_+_38082332.23-P1P2|NOL12_+_38082661.23-P1P2
RBM14	P1P2	1-2	essential	RBM14_+_66384103.23-P1P2	GACGACCGGCAGTCCTCCTC	1.0	7.0	essential	RBM14_-_66384112.23-P1P2	CCTCAGGAATGGCTGGCGAC	2.0	4.0	essential	RBM14_+_66384103.23-P1P2|RBM14_-_66384112.23-P1P2
SYS1	P1P2	1-2	significant	SYS1_+_43991817.23-P1P2	GAAAGCTCCAGCGACCACGG	1.0	1.0	empirical	SYS1_+_43991799.23-P1P2	ACGCAGCCGCTCCTGCCGCC	2.0	2.0	empirical	SYS1_+_43991817.23-P1P2|SYS1_+_43991799.23-P1P2
TTF2	P1P2	1-2	significant	TTF2_-_117602996.23-P1P2	GAAGTTAGGTGTCCAGAGCA	1.0	2.0	empirical	TTF2_-_117603001.23-P1P2	TACCGTGCTCTGGACACCTC	2.0	1.0	empirical	TTF2_-_117602996.23-P1P2|TTF2_-_117603001.23-P1P2
MYBBP1A	P1P2	1-2	essential	MYBBP1A_+_4458615.23-P1P2	GTCGGTGAGTGTGGCGGAGA	1.0	4.0	essential	MYBBP1A_-_4458722.23-P1P2	CCTCCGAGCCGACACAAACC	2.0	2.0	essential	MYBBP1A_+_4458615.23-P1P2|MYBBP1A_-_4458722.23-P1P2
GARS	P1P2	1-2	significant	GARS_+_30634632.23-P1P2	GGGCCGCGCTGAGGGACCGG	1.0	2.0	empirical	GARS_+_30634882.23-P1P2	CTGGCGTCTTCTTCGCCTCC	2.0	3.0	empirical	GARS_+_30634632.23-P1P2|GARS_+_30634882.23-P1P2
PPP1R2	P1P2	1-2	significant	PPP1R2_+_195269654.23-P1P2	GTTACCTACCCAGACCCCAG	1.0	6.0	empirical	PPP1R2_+_195270106.23-P1P2	GCCTAGAGCTCCAGCGCAGC	2.0	2.0	empirical	PPP1R2_+_195269654.23-P1P2|PPP1R2_+_195270106.23-P1P2
RPS18	P1P2	1-2	essential	RPS18_+_33239917.23-P1P2	GCTGCGATGCCGCTGGATCA	1.0	5.0	essential	RPS18_+_33239879.23-P1P2	CTTGTGCTGCAGCCATGGTC	2.0	4.0	essential	RPS18_+_33239917.23-P1P2|RPS18_+_33239879.23-P1P2
CDC6	P1P2	1-2	significant	CDC6_+_38444169.23-P1P2	GCCCTGAACAAACTGCACAG	1.0	3.0	empirical	CDC6_-_38444255.23-P1P2	CCTCAGTGCAGGATCCTTCC	2.0	5.0	empirical	CDC6_+_38444169.23-P1P2|CDC6_-_38444255.23-P1P2
EGLN2	P2	1-2	nonessential	EGLN2_-_41284213.23-P2	GGGCTGTAGCCGGAGTGGAG	1.0	1.0	predicted	EGLN2_-_41284185.23-P2	TCCTACTCCCCGGGCCCGGC	2.0	2.0	predicted	EGLN2_-_41284213.23-P2|EGLN2_-_41284185.23-P2
EEF2	P1	1-2	essential	EEF2_-_3985443.23-P1	GCGAGTCGCGCCGAGGATGG	1.0	1.0	essential	EEF2_+_3985431.23-P1	AGGATGGCGGCGACGACGGC	2.0	3.0	essential	EEF2_-_3985443.23-P1|EEF2_+_3985431.23-P1
RSL24D1	P1P2	1-2	essential	RSL24D1_-_55488919.23-P1P2	GGAGGAACCCGGGCCAAACA	1.0	1.0	essential	RSL24D1_-_55488741.23-P1P2	ACCAGGAATCTTGGATGTCC	2.0	9.0	essential	RSL24D1_-_55488919.23-P1P2|RSL24D1_-_55488741.23-P1P2
GJA3	P1P2	1-2	nonessential	GJA3_+_20735159.23-P1P2	GGCTGCAGGGATGGCGATCA	1.0	1.0	predicted	GJA3_+_20735180.23-P1P2	CAGTGTGCGCTGCGCCCGAC	2.0	2.0	predicted	GJA3_+_20735159.23-P1P2|GJA3_+_20735180.23-P1P2
NCL	P2	1-2	essential	NCL_+_232326465.23-P2	GGTGCTGCCATCCCAGCCAA	1.0	1.0	predicted	NCL_+_232326222.23-P2	AGTAACTACCAAGACAACTC	2.0	2.0	predicted	NCL_+_232326465.23-P2|NCL_+_232326222.23-P2
WDR74	P2	1-2	significant	WDR74_+_62609282.23-P2	GGCCGAGGCGACCGAAGTAA	1.0	1.0	predicted	WDR74_-_62609072.23-P2	TTGTTTAATGGAAGATTTCC	2.0	2.0	predicted	WDR74_+_62609282.23-P2|WDR74_-_62609072.23-P2
SNX15	P1	1-2	significant	SNX15_+_64781852.23-P1	GGCCCGCGTGGTGACGCCAG	1.0	4.0	empirical	SNX15_-_64781624.23-P1	GGTTCCTGTTGGCTATCACC	2.0	2.0	empirical	SNX15_+_64781852.23-P1|SNX15_-_64781624.23-P1
SUPT16H	P1P2	1-2	significant	SUPT16H_-_21851767.23-P1P2	GGGCGGGAAGAGACTGCGAG	1.0	6.0	empirical	SUPT16H_-_21851725.23-P1P2	TCCTACTCCGTGGTCACGTC	2.0	2.0	empirical	SUPT16H_-_21851767.23-P1P2|SUPT16H_-_21851725.23-P1P2
NSMCE2	P1P2	1-2	significant	NSMCE2_-_126104128.23-P1P2	GTTTCAGCGGCAGGCGAAGG	1.0	1.0	empirical	NSMCE2_-_126104115.23-P1P2	CTGAAAAGTGAGAGCGGGCC	2.0	2.0	empirical	NSMCE2_-_126104128.23-P1P2|NSMCE2_-_126104115.23-P1P2
HAUS7	P2	1-2	essential	HAUS7_-_152760909.23-P2	GTGGCTACCACCCTAGAGCG	1.0	1.0	predicted	HAUS7_+_152760894.23-P2	CCCTAGAGCGTGGCTGGGTC	2.0	2.0	predicted	HAUS7_-_152760909.23-P2|HAUS7_+_152760894.23-P2
H2AFX	P1P2	1-2	significant	H2AFX_-_118965752.23-P1P2	GCGGTGGCGCTGGTCTTCTT	1.0	10.0	empirical	H2AFX_+_118966156.23-P1P2	CCGCAGTGTAACTGCTGTCC	2.0	4.0	empirical	H2AFX_-_118965752.23-P1P2|H2AFX_+_118966156.23-P1P2
SFSWAP	P1P2	1-2	significant	SFSWAP_+_132196022.23-P1P2	GGATCAAGCGGGTGAGGGAA	1.0	7.0	empirical	SFSWAP_-_132195670.23-P1P2	ACCTCAACACCGCCGCCATC	2.0	2.0	empirical	SFSWAP_+_132196022.23-P1P2|SFSWAP_-_132195670.23-P1P2
CA5A	P1P2	1-2	nonessential	CA5A_+_87969813.23-P1P2	GAGACCGTCCCGAGCCAGAT	1.0	1.0	predicted	CA5A_+_87969837.23-P1P2	CTCTCCTCTCGAAAGACCCC	2.0	2.0	predicted	CA5A_+_87969813.23-P1P2|CA5A_+_87969837.23-P1P2
TPI1	P1P2	1-2	significant	TPI1_-_6976675.23-P1P2	GCGCGGCGCTCTATATAAGT	1.0	2.0	empirical	TPI1_-_6976921.23-P1P2	CGGGAGAGGGCGCTGCCACC	2.0	1.0	empirical	TPI1_-_6976675.23-P1P2|TPI1_-_6976921.23-P1P2
MRPS31	P1P2	1-2	significant	MRPS31_-_41345123.23-P1P2	GGGTTGCCTGAGGACCTACC	1.0	7.0	empirical	MRPS31_+_41345107.23-P1P2	GAGGACCTACCGGGCCAACC	2.0	1.0	empirical	MRPS31_-_41345123.23-P1P2|MRPS31_+_41345107.23-P1P2
RPAIN	P1P2	1-2	significant	RPAIN_-_5323498.23-P1P2	GTGTGCGCGCCTCCAGGGAA	1.0	1.0	empirical	RPAIN_-_5323902.23-P1P2	CTCTCGGTGGCCACCTCCGC	2.0	2.0	empirical	RPAIN_-_5323498.23-P1P2|RPAIN_-_5323902.23-P1P2
RPL13	P1P2	1-2	essential	RPL13_-_89627126.23-P1P2	GTTTCCTGCGCAGGAGGTGA	1.0	4.0	essential	RPL13_+_89627082.23-P1P2	CTTCCTTTCCGCTCGGCTGC	2.0	3.0	essential	RPL13_-_89627126.23-P1P2|RPL13_+_89627082.23-P1P2
MRPL16	P1P2	1-2	essential	MRPL16_+_59578187.23-P1P2	GGGAGCGCCGCTGCTTACCT	1.0	5.0	essential	MRPL16_+_59578213.23-P1P2	AGCTGTAATCGGCTCAGGAC	2.0	1.0	essential	MRPL16_+_59578187.23-P1P2|MRPL16_+_59578213.23-P1P2
RPL21	P1P2	1-2	essential	RPL21_+_27825728.23-P1P2	GGCGCCCGGGAGCCACGCGT	1.0	3.0	essential	RPL21_+_27825711.23-P1P2	TCTTCCAGGTAGGGCCTACC	2.0	2.0	essential	RPL21_+_27825728.23-P1P2|RPL21_+_27825711.23-P1P2
ERVW-1	ENST00000493463.2	1-2	nonessential	ERVW-1_-_92100569.23-ENST00000493463.2	GCAGTTGCCAGTCTTCTCCA	1.0	1.0	predicted	ERVW-1_-_92100632.23-ENST00000493463.2	GAGAAATAATCCCCTGCCTC	2.0	2.0	predicted	ERVW-1_-_92100569.23-ENST00000493463.2|ERVW-1_-_92100632.23-ENST00000493463.2
CMTR1	P1P2	1-2	significant	CMTR1_-_37401025.23-P1P2	GGGACCCGAGCGCGACGGTG	1.0	3.0	empirical	CMTR1_-_37401070.23-P1P2	CCCTCAGTTTCGTTTCCCCC	2.0	6.0	empirical	CMTR1_-_37401025.23-P1P2|CMTR1_-_37401070.23-P1P2
PCID2	P2	1-2	significant	PCID2_-_113841577.23-P2	GCAGGAATGATGACCTCTAT	1.0	1.0	predicted	PCID2_-_113841606.23-P2	GTTGGGGTTTGCTTTTGTCC	2.0	2.0	predicted	PCID2_-_113841577.23-P2|PCID2_-_113841606.23-P2
COQ5	P1P2	1-2	significant	COQ5_+_120966966.23-P1P2	GCGCAACAAGGCGTACTCTC	1.0	9.0	empirical	COQ5_-_120966902.23-P1P2	TGGGTGGTCGCGGGCGATGC	2.0	4.0	empirical	COQ5_+_120966966.23-P1P2|COQ5_-_120966902.23-P1P2
PDCD5	P1P2	1-2	significant	PDCD5_-_33072142.23-P1P2	GGGGGCTGCGAGAGTGACCG	1.0	2.0	empirical	PDCD5_-_33072173.23-P1P2	CCATGGCTCGGCGTCAGCGC	2.0	1.0	empirical	PDCD5_-_33072142.23-P1P2|PDCD5_-_33072173.23-P1P2
CINP	P1P2	1-2	essential	CINP_+_102829193.23-P1P2	GCTCCTTCTACGGATATCTG	1.0	5.0	essential	CINP_-_102829164.23-P1P2	TTCCCGGGGTGGGGTGGCTC	2.0	3.0	essential	CINP_+_102829193.23-P1P2|CINP_-_102829164.23-P1P2
SPRTN	P1P2	1-2	nonessential	SPRTN_-_231474045.23-P1P2	GATCTCCTAGGAGCTAGTCC	1.0	1.0	predicted	SPRTN_+_231474047.23-P1P2	CGGCTAGGCGGCTTGGGGTC	2.0	2.0	predicted	SPRTN_-_231474045.23-P1P2|SPRTN_+_231474047.23-P1P2
TTC4	P1P2	1-2	essential	TTC4_-_55181504.23-P1P2	GGCGCTGCCGGGAGGATTGA	1.0	6.0	essential	TTC4_-_55181476.23-P1P2	CGCCTTGGGTTCCGCCGGCC	2.0	1.0	essential	TTC4_-_55181504.23-P1P2|TTC4_-_55181476.23-P1P2
DARS	P1P2	1-2	essential	DARS_-_136742757.23-P1P2	GCCGGGGACACGCTTCTAGT	1.0	9.0	essential	DARS_+_136743138.23-P1P2	TGGGGTCTCAGCACACGCGC	2.0	7.0	essential	DARS_-_136742757.23-P1P2|DARS_+_136743138.23-P1P2
GON4L	P1	1-2	significant	GON4L_-_155826980.23-P1	GGATTCCACGGAAACGGCTT	1.0	1.0	empirical	GON4L_+_155826818.23-P1	TTAACTTCCGCCACGCACCC	2.0	2.0	empirical	GON4L_-_155826980.23-P1|GON4L_+_155826818.23-P1
NSUN4	P1P2	1-2	significant	NSUN4_-_46806501.23-P1P2	GCCCGTGGAGCACGCCGATA	1.0	3.0	empirical	NSUN4_-_46806520.23-P1P2	CTCAGTGTCAGCGCAGCCAC	2.0	2.0	empirical	NSUN4_-_46806501.23-P1P2|NSUN4_-_46806520.23-P1P2
PPIH	P1P2	1-2	significant	PPIH_-_43124126.23-P1P2	GCGGGTCGGAGCCATGGCGG	1.0	2.0	empirical	PPIH_+_43124361.23-P1P2	CGCTTCTGGAGGAACTGGGC	2.0	1.0	empirical	PPIH_-_43124126.23-P1P2|PPIH_+_43124361.23-P1P2
TBCE	P1P2	1-2	essential	TBCE_-_235530783.23-P1P2	GGCTGGGCAGTTGGCTGGAG	1.0	2.0	essential	TBCE_+_235530696.23-P1P2	TACCTCACTCCGGTGGAGGC	2.0	6.0	essential	TBCE_-_235530783.23-P1P2|TBCE_+_235530696.23-P1P2
SBNO1	P1P2	1-2	significant	SBNO1_-_123849323.23-P1P2	GGGACCAGAGGCGACTGGAG	1.0	3.0	empirical	SBNO1_-_123849326.23-P1P2	CCGCTCCAGTCGCCTCTGGC	2.0	2.0	empirical	SBNO1_-_123849323.23-P1P2|SBNO1_-_123849326.23-P1P2
CENPW	P1P2	1-2	significant	CENPW_+_126661305.23-P1P2	GGTCCGTATGACGCTTCTTC	1.0	2.0	empirical	CENPW_-_126661477.23-P1P2	CGGGGAGCCTTCCGCTTTAC	2.0	1.0	empirical	CENPW_+_126661305.23-P1P2|CENPW_-_126661477.23-P1P2
GEMIN8	P1P2	1-2	significant	GEMIN8_-_14047941.23-P1P2	GCTGGGCGTTGGCCGCGCAG	1.0	5.0	empirical	GEMIN8_-_14047956.23-P1P2	AGGAAAACTAGGCCCCTGCC	2.0	4.0	empirical	GEMIN8_-_14047941.23-P1P2|GEMIN8_-_14047956.23-P1P2
AQR	P1P2	1-2	essential	AQR_+_35261872.23-P1P2	GACTTAAGGGAAGTGGACCA	1.0	3.0	essential	AQR_-_35261877.23-P1P2	GGGTTGCCGCTGCCCAGAGC	2.0	5.0	essential	AQR_+_35261872.23-P1P2|AQR_-_35261877.23-P1P2
SUMO2	P1P2	1-2	significant	SUMO2_+_73178795.23-P1P2	GGCTTTCCCGGGCCCCCCAC	1.0	1.0	empirical	SUMO2_-_73178625.23-P1P2	CGAACGGGGATTCTTGGCCC	2.0	4.0	empirical	SUMO2_+_73178795.23-P1P2|SUMO2_-_73178625.23-P1P2
DDX27	P1P2	1-2	essential	DDX27_-_47836019.23-P1P2	GTCGGCTTAATCGGAACCAT	1.0	3.0	essential	DDX27_+_47836013.23-P1P2	TAGGCGAGGATGACGAGGTC	2.0	2.0	essential	DDX27_-_47836019.23-P1P2|DDX27_+_47836013.23-P1P2
MRPL35	P1P2	1-2	essential	MRPL35_+_86426814.23-P1P2	GGAGTCGGGGGACTTGGTAC	1.0	4.0	essential	MRPL35_-_86426601.23-P1P2	ACGGCGGCCGCTTTGGGTTC	2.0	3.0	essential	MRPL35_+_86426814.23-P1P2|MRPL35_-_86426601.23-P1P2
DHPS	P1P2	1-2	significant	DHPS_-_12792690.23-P1P2	GCGCAAGAGCACAGGAAGTA	1.0	3.0	empirical	DHPS_+_12792583.23-P1P2	ATAGCCGGCTCTCGAGTCAC	2.0	8.0	empirical	DHPS_-_12792690.23-P1P2|DHPS_+_12792583.23-P1P2
TIPIN	P1P2	1-2	significant	TIPIN_-_66649067.23-P1P2	GGGAACTCCTGGGGCGAGAA	1.0	2.0	empirical	TIPIN_-_66649057.23-P1P2	AGGAGTTCCCGAGTATCGCC	2.0	1.0	empirical	TIPIN_-_66649067.23-P1P2|TIPIN_-_66649057.23-P1P2
RTF1	P1P2	1-2	significant	RTF1_-_41709376.23-P1P2	GGCGGCAGTGGCGGTCCCAC	1.0	3.0	empirical	RTF1_-_41709401.23-P1P2	GGACTCCCCTCTTGCCCGCC	2.0	5.0	empirical	RTF1_-_41709376.23-P1P2|RTF1_-_41709401.23-P1P2
TBL3	P1P2	1-2	significant	TBL3_-_2022111.23-P1P2	GGGTGCTAACCTCCCTCACG	1.0	5.0	empirical	TBL3_+_2022121.23-P1P2	GGACCCTAGCAGGTTTCAGC	2.0	2.0	empirical	TBL3_-_2022111.23-P1P2|TBL3_+_2022121.23-P1P2
RPL30	P1P2	1-2	essential	RPL30_+_99057726.23-P1P2	GGCGGCTGCTGTTGGTGAGT	1.0	4.0	essential	RPL30_+_99057534.23-P1P2	CGTGAATCGTCTTCCGGGCC	2.0	1.0	essential	RPL30_+_99057726.23-P1P2|RPL30_+_99057534.23-P1P2
COPB1	P1P2	1-2	essential	COPB1_-_14521337.23-P1P2	GGCCGCGGATCCGTCTACTG	1.0	1.0	essential	COPB1_-_14521352.23-P1P2	GAGTAGACGGAGCCGCAGTC	2.0	7.0	essential	COPB1_-_14521337.23-P1P2|COPB1_-_14521352.23-P1P2
DLD	P1P2	1-2	essential	DLD_-_107531642.23-P1P2	GGGAGACCTTGGCGGAGCGG	1.0	1.0	essential	DLD_-_107531673.23-P1P2	CCAATACTTTCACCTCCGCC	2.0	5.0	essential	DLD_-_107531642.23-P1P2|DLD_-_107531673.23-P1P2
INTS5	P1P2	1-2	significant	INTS5_-_62420725.23-P1P2	GTCGCACAGCGCGGACATCC	1.0	2.0	empirical	INTS5_-_62420595.23-P1P2	ATCCCTAGCCTTCTCGGTAC	2.0	5.0	empirical	INTS5_-_62420725.23-P1P2|INTS5_-_62420595.23-P1P2
CENPI	P1P2	1-2	essential	CENPI_-_100353207.23-P1P2	GGGCGGCATTCGGTGGTCAG	1.0	5.0	essential	CENPI_+_100353181.23-P1P2	GAGGCGGCATTCGGTGGTCC	2.0	10.0	essential	CENPI_-_100353207.23-P1P2|CENPI_+_100353181.23-P1P2
ARPC3	P1	1-2	significant	ARPC3_+_110888087.23-P1	GACCTGGATCCTGCTCCTCT	1.0	2.0	empirical	ARPC3_-_110888115.23-P1	CTGTACCTGGATCCTGCTCC	2.0	1.0	empirical	ARPC3_+_110888087.23-P1|ARPC3_-_110888115.23-P1
ERAL1	P1P2	1-2	significant	ERAL1_+_27182286.23-P1P2	GAAGGAGTCACCGAACTGTC	1.0	8.0	empirical	ERAL1_+_27182214.23-P1P2	CGCTTGGCCTCGGCTTCTCC	2.0	1.0	empirical	ERAL1_+_27182286.23-P1P2|ERAL1_+_27182214.23-P1P2
RAD21	P1P2	1-2	significant	RAD21_+_117886444.23-P1P2	GGACCGGGCCGCCTACTCCG	1.0	9.0	empirical	RAD21_-_117886366.23-P1P2	AACTCGGGTGCGGGGCTCAC	2.0	10.0	empirical	RAD21_+_117886444.23-P1P2|RAD21_-_117886366.23-P1P2
CWC22	P1P2	1-2	essential	CWC22_-_180871781.23-P1P2	GTCTGCCTGCGGGGACTCCA	1.0	3.0	essential	CWC22_+_180871546.23-P1P2	GTCCGCTCAGGCAGTCAGTC	2.0	7.0	essential	CWC22_-_180871781.23-P1P2|CWC22_+_180871546.23-P1P2
HCRTR1	P1P2	1-2	nonessential	HCRTR1_-_32083351.23-P1P2	GGCCGAGGCAGCGCAGCCTA	1.0	1.0	predicted	HCRTR1_-_32083355.23-P1P2	TCCCTAGGCTGCGCTGCCTC	2.0	2.0	predicted	HCRTR1_-_32083351.23-P1P2|HCRTR1_-_32083355.23-P1P2
PTCD3	P1P2	1-2	essential	PTCD3_-_86333438.23-P1P2	GTGGCCAGCCGCTGACGGGT	1.0	4.0	essential	PTCD3_+_86333402.23-P1P2	CCGCAGCAGGCTTGGCCAGC	2.0	7.0	essential	PTCD3_-_86333438.23-P1P2|PTCD3_+_86333402.23-P1P2
RSRC2	P1P2	1-2	significant	RSRC2_-_123011510.23-P1P2	GCTCGCGCGAGAGACCCGGA	1.0	2.0	empirical	RSRC2_-_123011518.23-P1P2	TTGTGCCATCCGGGTCTCTC	2.0	4.0	empirical	RSRC2_-_123011510.23-P1P2|RSRC2_-_123011518.23-P1P2
ANAPC13	P1P2	1-2	essential	ANAPC13_-_134204795.23-P1P2	GGGGCGCTGGAAACCCTTAC	1.0	1.0	essential	ANAPC13_+_134204787.23-P1P2	TACCGGCACCCGGCCACCGC	2.0	2.0	essential	ANAPC13_-_134204795.23-P1P2|ANAPC13_+_134204787.23-P1P2
PRKRA	P1P2	1-2	significant	PRKRA_-_179315511.23-P1P2	GCCAGGGACCACGAGAGGGG	1.0	10.0	empirical	PRKRA_-_179315799.23-P1P2	CACCGCTCTTCCTCCAGCCC	2.0	5.0	empirical	PRKRA_-_179315511.23-P1P2|PRKRA_-_179315799.23-P1P2
OR4K1	ENST00000285600.4	1-2	nonessential	OR4K1_-_20403828.23-ENST00000285600.4	GTAACTGAATATTGGATACA	1.0	1.0	predicted	OR4K1_+_20404057.23-ENST00000285600.4	CCAAGATGCTTGTAGACTTC	2.0	2.0	predicted	OR4K1_-_20403828.23-ENST00000285600.4|OR4K1_+_20404057.23-ENST00000285600.4
UNC50	P1P2	1-2	significant	UNC50_-_99225118.23-P1P2	GAGGGAAGCCCGCCCGGTGG	1.0	4.0	empirical	UNC50_-_99225100.23-P1P2	TTCCCTCAACGGAGCCGGCC	2.0	3.0	empirical	UNC50_-_99225118.23-P1P2|UNC50_-_99225100.23-P1P2
WBP11	P1	1-2	essential	WBP11_+_14956444.23-P1	GCTAAGAGAAGGCGGGACAG	1.0	3.0	essential	WBP11_+_14956413.23-P1	CTCCGCACTCCTCACGTCAC	2.0	4.0	essential	WBP11_+_14956444.23-P1|WBP11_+_14956413.23-P1
PIGH	P1P2	1-2	significant	PIGH_-_68066655.23-P1P2	GTGTAGGAGGGGCCGACCAG	1.0	6.0	empirical	PIGH_+_68066617.23-P1P2	TCCTGTCCTATCACTGTAGC	2.0	1.0	empirical	PIGH_-_68066655.23-P1P2|PIGH_+_68066617.23-P1P2
GFM1	P1P2	1-2	essential	GFM1_-_158362387.23-P1P2	GACCGGCAGCTGAACCCACC	1.0	4.0	essential	GFM1_+_158362379.23-P1P2	ACCCGGCGCCACGGGACTTC	2.0	2.0	essential	GFM1_-_158362387.23-P1P2|GFM1_+_158362379.23-P1P2
HDAC3	P1P2	1-2	significant	HDAC3_+_141016415.23-P1P2	GAGCACGCACGGCCGGGGAG	1.0	3.0	empirical	HDAC3_-_141016238.23-P1P2	GGGGTGAGAGCTGACGAACC	2.0	2.0	empirical	HDAC3_+_141016415.23-P1P2|HDAC3_-_141016238.23-P1P2
EXOC4	P1P2	1-2	essential	EXOC4_-_132937863.23-P1P2	GCTCCCCGCGTCCAAGATGG	1.0	2.0	essential	EXOC4_+_132937814.23-P1P2	TTGGCTTCCTTGGAGCCTAC	2.0	1.0	essential	EXOC4_-_132937863.23-P1P2|EXOC4_+_132937814.23-P1P2
TBCC	P1P2	1-2	significant	TBCC_-_42713803.23-P1P2	GGCAGCAGCGGAGCAACTGA	1.0	1.0	empirical	TBCC_-_42713815.23-P1P2	ATATGGAGTCCGTCAGTTGC	2.0	2.0	empirical	TBCC_-_42713803.23-P1P2|TBCC_-_42713815.23-P1P2
HIST1H2BE	ENST00000356530.3	1-2	nonessential	HIST1H2BE_+_26184421.23-ENST00000356530.3	GAGAGCCTTTGGGTTTACTA	1.0	1.0	predicted	HIST1H2BE_+_26184396.23-ENST00000356530.3	AGTAAACTTGTCCCTGCAAC	2.0	2.0	predicted	HIST1H2BE_+_26184421.23-ENST00000356530.3|HIST1H2BE_+_26184396.23-ENST00000356530.3
UBA52	P2	1-2	significant	UBA52_+_18684266.23-P2	GACAGGACTGAGACTCCCCT	1.0	1.0	predicted	UBA52_-_18684292.23-P2	ACACAGGACTGAGACTCCCC	2.0	2.0	predicted	UBA52_+_18684266.23-P2|UBA52_-_18684292.23-P2
DHX37	P1P2	1-2	significant	DHX37_+_125473628.23-P1P2	GGTGGTCTGGGAACCCACGT	1.0	3.0	empirical	DHX37_-_125473637.23-P1P2	ACGTGGGCTGGGTTTCGGAC	2.0	4.0	empirical	DHX37_+_125473628.23-P1P2|DHX37_-_125473637.23-P1P2
PRIM2	P1P2	1-2	essential	PRIM2_-_57182458.23-P1P2	GTCCCGCCACCCGGGAACAG	1.0	3.0	essential	PRIM2_-_57182450.23-P1P2	GGGTGGCGGGAGAGTTCATC	2.0	7.0	essential	PRIM2_-_57182458.23-P1P2|PRIM2_-_57182450.23-P1P2
ATP6V0C	P1P2	1-2	significant	ATP6V0C_+_2564168.23-P1P2	GCGCTCACCGCTGAAGACCA	1.0	6.0	empirical	ATP6V0C_-_2563995.23-P1P2	GCCCGTCAGCCGCTGCGCTC	2.0	3.0	empirical	ATP6V0C_+_2564168.23-P1P2|ATP6V0C_-_2563995.23-P1P2
AAAS	P1P2	1-2	nonessential	AAAS_-_53715438.23-P1P2	GAGGACGAGTACGCGGTCCC	1.0	1.0	predicted	AAAS_+_53715355.23-P1P2	CAAGGGACAAACGGCGAGGC	2.0	2.0	predicted	AAAS_-_53715438.23-P1P2|AAAS_+_53715355.23-P1P2
VPS37C	P1P2	1-2	nonessential	VPS37C_+_60928912.23-P1P2	GTGGCGGACCCCGGAAGTGT	1.0	1.0	predicted	VPS37C_+_60928845.23-P1P2	CAGTCTCCGCTCACCTGCCC	2.0	2.0	predicted	VPS37C_+_60928912.23-P1P2|VPS37C_+_60928845.23-P1P2
MRPS18B	P1P2	1-2	significant	MRPS18B_+_30585681.23-P1P2	GCTCGGAAGAGAGATAGCAT	1.0	4.0	empirical	MRPS18B_+_30585664.23-P1P2	TGCTGAGGCGGCTTCCTATC	2.0	1.0	empirical	MRPS18B_+_30585681.23-P1P2|MRPS18B_+_30585664.23-P1P2
POLR3D	P1P2	1-2	significant	POLR3D_-_22102673.23-P1P2	GCGCCCGGCGCGGAGACCGA	1.0	6.0	empirical	POLR3D_-_22103044.23-P1P2	ATGAGCCCCCGGGCCCCAGC	2.0	1.0	empirical	POLR3D_-_22102673.23-P1P2|POLR3D_-_22103044.23-P1P2
NOP2	P1P2	1-2	essential	NOP2_+_6677426.23-P1P2	GGCCGGCCGAAAGCTAGGTC	1.0	5.0	essential	NOP2_+_6677431.23-P1P2	AGCTTTCGGCCGGCACTCGC	2.0	2.0	essential	NOP2_+_6677426.23-P1P2|NOP2_+_6677431.23-P1P2
AP2S1	P1P2	1-2	significant	AP2S1_-_47354086.23-P1P2	GACTGGGCAGCTCCGGCTCA	1.0	3.0	empirical	AP2S1_-_47354099.23-P1P2	TACAACTGCACCCTGAGCCC	2.0	1.0	empirical	AP2S1_-_47354086.23-P1P2|AP2S1_-_47354099.23-P1P2
ZCCHC9	P1P2	1-2	essential	ZCCHC9_+_80597457.23-P1P2	GTCCCCCAGAGCAGCCGAGT	1.0	3.0	essential	ZCCHC9_-_80597504.23-P1P2	CGCAGCTTCTTACCGCGCAC	2.0	1.0	essential	ZCCHC9_+_80597457.23-P1P2|ZCCHC9_-_80597504.23-P1P2
OR4F4	ENST00000326183.3	1-2	nonessential	OR4F4_+_102463258.23-ENST00000326183.3	GAGTGAAACGAATAACTCTA	1.0	1.0	predicted	OR4F4_+_102463292.23-ENST00000326183.3	GGAAATAGCCTCTGCAGTTC	2.0	2.0	predicted	OR4F4_+_102463258.23-ENST00000326183.3|OR4F4_+_102463292.23-ENST00000326183.3
RPP21	P1P2	1-2	significant	RPP21_-_30312986.23-P1P2	GGGACCGCGAGGCCTTCCAG	1.0	1.0	empirical	RPP21_+_30312957.23-P1P2	GTGAAGGACCGCGAGGCCTC	2.0	4.0	empirical	RPP21_-_30312986.23-P1P2|RPP21_+_30312957.23-P1P2
C14orf178	P1P2	1-2	essential	C14orf178_+_78227426.23-P1P2	GTTGATTGGGGTCCTCGATA	1.0	1.0	essential	C14orf178_+_78227476.23-P1P2	CTTCTTCCAGCGCGAGCGAC	2.0	9.0	essential	C14orf178_+_78227426.23-P1P2|C14orf178_+_78227476.23-P1P2
EBNA1BP2	P1P2	1-2	significant	EBNA1BP2_-_43637779.23-P1P2	GACTCCGAATCCGAGAGCGG	1.0	1.0	empirical	EBNA1BP2_+_43637890.23-P1P2	CTACTCCCACGCCGTGGCTC	2.0	4.0	empirical	EBNA1BP2_-_43637779.23-P1P2|EBNA1BP2_+_43637890.23-P1P2
MRPL9	P1P2	1-2	significant	MRPL9_-_151735983.23-P1P2	GGGCACAGAATGAGACCTGA	1.0	5.0	empirical	MRPL9_-_151735986.23-P1P2	CCCTCAGGTCTCATTCTGTC	2.0	8.0	empirical	MRPL9_-_151735983.23-P1P2|MRPL9_-_151735986.23-P1P2
PRMT1	P1P2	1-2	significant	PRMT1_-_50180469.23-P1P2	GCCGTGGACCCTCTGGTATA	1.0	1.0	empirical	PRMT1_+_50180741.23-P1P2	TAGCTTCCAAGGGCCTTCGC	2.0	2.0	predicted	PRMT1_-_50180469.23-P1P2|PRMT1_+_50180741.23-P1P2
MZF1	P1P2	1-2	nonessential	MZF1_+_59084628.23-P1P2	GGATTCGAGGCGGGGAGCAT	1.0	1.0	predicted	MZF1_-_59084690.23-P1P2	TCTGTTGTACCTGAGAGGCC	2.0	2.0	predicted	MZF1_+_59084628.23-P1P2|MZF1_-_59084690.23-P1P2
SF3A1	P2	1-2	essential	SF3A1_-_30736749.23-P2	GGGGGCAGAGGTGGAGGCAT	1.0	1.0	predicted	SF3A1_-_30736509.23-P2	TAGTGCCTTTCACAGTGCCC	2.0	2.0	predicted	SF3A1_-_30736749.23-P2|SF3A1_-_30736509.23-P2
CENPA	P2	1-2	essential	CENPA_-_27008953.23-P2	GCCAAGCACCGGCTCATGTG	1.0	1.0	essential	CENPA_-_27008942.23-P2	GTGCTTGGCAGAAGTCCGCC	2.0	5.0	essential	CENPA_-_27008953.23-P2|CENPA_-_27008942.23-P2
POLR2A	P1P2	1-2	significant	POLR2A_+_7388145.23-P1P2	GCGGACTCAGGACTCCGAAC	1.0	7.0	empirical	POLR2A_-_7388024.23-P1P2	CCTAGGTGCTCAGACCTCGC	2.0	7.0	empirical	POLR2A_+_7388145.23-P1P2|POLR2A_-_7388024.23-P1P2
RPS21	P1P2	1-2	significant	RPS21_+_60962140.23-P1P2	GAAGGAAGCAGCTAGTCACC	1.0	2.0	empirical	RPS21_+_60962128.23-P1P2	ATATCTCTGCCGGGTGACTC	2.0	6.0	empirical	RPS21_+_60962140.23-P1P2|RPS21_+_60962128.23-P1P2
IGBP1	P1P2	1-2	significant	IGBP1_-_69353829.23-P1P2	GGGACGAGTTACAGCTGCCG	1.0	3.0	empirical	IGBP1_-_69353474.23-P1P2	GGGTGAGGCGAGGCTGAATC	2.0	1.0	empirical	IGBP1_-_69353829.23-P1P2|IGBP1_-_69353474.23-P1P2
TAF1	P1P2	1-2	significant	TAF1_-_70586444.23-P1P2	GTGCTCAGGCAGCGAGAACA	1.0	4.0	empirical	TAF1_+_70586687.23-P1P2	CTCTGACATCGCTGCCCTGC	2.0	10.0	empirical	TAF1_-_70586444.23-P1P2|TAF1_+_70586687.23-P1P2
ATL2	P1P2	1-2	significant	ATL2_+_38604354.23-P1P2	GAGGGCAGCAACCGCACCAG	1.0	1.0	empirical	ATL2_+_38604046.23-P1P2	CTGGTTCTCCCAGCAGCTAC	2.0	3.0	empirical	ATL2_+_38604354.23-P1P2|ATL2_+_38604046.23-P1P2
ENO1	P1P2	1-2	significant	ENO1_+_8938733.23-P1P2	GCGGCGCGGACAGTATCTGT	1.0	1.0	empirical	ENO1_-_8938710.23-P1P2	GCTTTACGTTCACCTCGGTC	2.0	6.0	empirical	ENO1_+_8938733.23-P1P2|ENO1_-_8938710.23-P1P2
EXOSC2	P1P2	1-2	essential	EXOSC2_-_133569408.23-P1P2	GTAACTCCCCGCGGGACCCA	1.0	3.0	essential	EXOSC2_+_133569139.23-P1P2	GACTGAGCTGCGCCTGCGCC	2.0	1.0	essential	EXOSC2_-_133569408.23-P1P2|EXOSC2_+_133569139.23-P1P2
EXOSC1	P1P2	1-2	significant	EXOSC1_-_99205715.23-P1P2	GGGGAAGCGCTCACTTACCG	1.0	1.0	empirical	EXOSC1_-_99205735.23-P1P2	CCTGTGAGATACTGCATCCC	2.0	4.0	empirical	EXOSC1_-_99205715.23-P1P2|EXOSC1_-_99205735.23-P1P2
WDR4	P1P2	1-2	nonessential	WDR4_+_44299648.23-P1P2	GGACCGGTGCGGACAGGAAG	1.0	1.0	predicted	WDR4_+_44299621.23-P1P2	CCATACACATGTGCCAGCCC	2.0	2.0	predicted	WDR4_+_44299648.23-P1P2|WDR4_+_44299621.23-P1P2
THOC3	P1P2	1-2	significant	THOC3_-_175395258.23-P1P2	GAACACTGCAGCAGCCTCCA	1.0	8.0	empirical	THOC3_-_175395273.23-P1P2	GGACTGACTGCGCCGTGGAC	2.0	7.0	empirical	THOC3_-_175395258.23-P1P2|THOC3_-_175395273.23-P1P2
CCT3	P1P2	1-2	essential	CCT3_+_156308067.23-P1P2	GTGAGGTGTAAGCCCTGAGG	1.0	1.0	essential	CCT3_-_156307863.23-P1P2	CCACTGACCGGGCCACTGAC	2.0	2.0	essential	CCT3_+_156308067.23-P1P2|CCT3_-_156307863.23-P1P2
EXOSC4	P1P2	1-2	essential	EXOSC4_-_145133639.23-P1P2	GGCGGCCGGGCAGCATGGCG	1.0	4.0	essential	EXOSC4_-_145133618.23-P1P2	GGTCCGCTCTCTGCCTACTC	2.0	3.0	essential	EXOSC4_-_145133639.23-P1P2|EXOSC4_-_145133618.23-P1P2
ARPC3	P2	1-2	significant	ARPC3_-_110883364.23-P2	GAAGAGTGGTAAGCCTGTAA	1.0	1.0	predicted	ARPC3_+_110883121.23-P2	CAGTATCTACCAAGCAAAGC	2.0	2.0	predicted	ARPC3_-_110883364.23-P2|ARPC3_+_110883121.23-P2
DDX19A	P1P2	1-2	significant	DDX19A_+_70380901.23-P1P2	GACCGCCAGGGCCCACGAGT	1.0	9.0	empirical	DDX19A_-_70380833.23-P1P2	TAACCTCGCCACCGGCGCGC	2.0	4.0	empirical	DDX19A_+_70380901.23-P1P2|DDX19A_-_70380833.23-P1P2
CHAF1B	P1P2	1-2	essential	CHAF1B_+_37757745.23-P1P2	GGGGCCAGGGAAGCCGTACC	1.0	4.0	essential	CHAF1B_+_37757724.23-P1P2	CTGACTGTCCGGGTCCCTCC	2.0	3.0	essential	CHAF1B_+_37757745.23-P1P2|CHAF1B_+_37757724.23-P1P2
DDX21	P1P2	1-2	essential	DDX21_-_70715959.23-P1P2	GCGCGGTTGAGAAGACCGGT	1.0	3.0	essential	DDX21_-_70715913.23-P1P2	TGGGTCCACCCGGCTCTCGC	2.0	6.0	essential	DDX21_-_70715959.23-P1P2|DDX21_-_70715913.23-P1P2
CTNNBL1	P1P2	1-2	significant	CTNNBL1_-_36322495.23-P1P2	GCGGTCTGGGCGTGAGTGCA	1.0	4.0	empirical	CTNNBL1_-_36322534.23-P1P2	ACGTCCATGGTACCCGGCCC	2.0	1.0	empirical	CTNNBL1_-_36322495.23-P1P2|CTNNBL1_-_36322534.23-P1P2
DIS3	P1P2	1-2	significant	DIS3_-_73355816.23-P1P2	GCGCTGCTCGCCGGGTCCTG	1.0	8.0	empirical	DIS3_+_73356045.23-P1P2	GGAGGTTCTTCCCTTTCCAC	2.0	3.0	empirical	DIS3_-_73355816.23-P1P2|DIS3_+_73356045.23-P1P2
ARF4	P1P2	1-2	nonessential	ARF4_-_57583033.23-P1P2	GCCCTGTGCCGATGAAGATC	1.0	1.0	predicted	ARF4_+_57583046.23-P1P2	GTAGAGGACCTGCTAGGCGC	2.0	2.0	predicted	ARF4_-_57583033.23-P1P2|ARF4_+_57583046.23-P1P2
NFYB	P1P2	1-2	significant	NFYB_-_104531640.23-P1P2	GCGGGCCCGGAGCTCAACGG	1.0	2.0	empirical	NFYB_-_104531637.23-P1P2	TTGAGCTCCGGGCCCGGGGC	2.0	3.0	empirical	NFYB_-_104531640.23-P1P2|NFYB_-_104531637.23-P1P2
NOMO3	P1P2	1-2	significant	NOMO3_-_16326444.23-P1P2	GGGCTGTCAGCCGGCCTAGG	1.0	4.0	empirical	NOMO3_+_16326739.23-P1P2	CTCTGGGCCGCGCTGGCCTC	2.0	5.0	empirical	NOMO3_-_16326444.23-P1P2|NOMO3_+_16326739.23-P1P2
RPUSD3	P1P2	1-2	significant	RPUSD3_-_9885662.23-P1P2	GCCAGAACCGGCCCAAAACA	1.0	2.0	empirical	RPUSD3_+_9885666.23-P1P2	TCCATCTCCCGAGCCAGGAC	2.0	1.0	empirical	RPUSD3_-_9885662.23-P1P2|RPUSD3_+_9885666.23-P1P2
TLCD1	P1P2	1-2	nonessential	TLCD1_-_27053186.23-P1P2	GGGGAACCGGGATCCCTCTC	1.0	1.0	predicted	TLCD1_+_27053148.23-P1P2	CCTAGGTCTGTTCTGGGAAC	2.0	2.0	predicted	TLCD1_-_27053186.23-P1P2|TLCD1_+_27053148.23-P1P2
ILF3	P1P2	1-2	significant	ILF3_+_10765043.23-P1P2	GCTGCTGGGTCCAACTGCAA	1.0	4.0	empirical	ILF3_+_10765009.23-P1P2	CCGGTCCGGACTCCTCCTCC	2.0	1.0	empirical	ILF3_+_10765043.23-P1P2|ILF3_+_10765009.23-P1P2
LTBP3	P1P2	1-2	nonessential	LTBP3_-_65325704.23-P1P2	GAGGAGGCCGGAGCAAGTTG	1.0	1.0	predicted	LTBP3_-_65325688.23-P1P2	CCTCGCTCCTGCCTGAGTTC	2.0	2.0	predicted	LTBP3_-_65325704.23-P1P2|LTBP3_-_65325688.23-P1P2
PARS2	P1P2	1-2	essential	PARS2_+_55230150.23-P1P2	GACGGCGGTGGTCTTGCGGG	1.0	1.0	essential	PARS2_+_55230144.23-P1P2	ACGCCTCCCGCAAGACCACC	2.0	2.0	essential	PARS2_+_55230150.23-P1P2|PARS2_+_55230144.23-P1P2
TREX2	P1P2	1-2	essential	TREX2_+_152735963.23-P1P2	GGGCGGCGACGACTACTCAG	1.0	3.0	essential	TREX2_+_152736011.23-P1P2	TGTTTCGCGCTCCGAGCCGC	2.0	1.0	essential	TREX2_+_152735963.23-P1P2|TREX2_+_152736011.23-P1P2
NPLOC4	P1P2	1-2	significant	NPLOC4_+_79604076.23-P1P2	GCGGGCGGGCGAAGCTGGAG	1.0	3.0	empirical	NPLOC4_+_79604108.23-P1P2	CCGACGTCCCGGTGCCTCGC	2.0	1.0	empirical	NPLOC4_+_79604076.23-P1P2|NPLOC4_+_79604108.23-P1P2
HSCB	P1P2	1-2	significant	HSCB_-_29138088.23-P1P2	GATAGGCCGCCGGCCAGATG	1.0	3.0	empirical	HSCB_+_29138256.23-P1P2	ACAGTGCCGAGCGCTGCAGC	2.0	5.0	empirical	HSCB_-_29138088.23-P1P2|HSCB_+_29138256.23-P1P2
XRCC1	P1P2	1-2	significant	XRCC1_-_44079668.23-P1P2	GGTAGAGTATGGGGTCCGAG	1.0	2.0	empirical	XRCC1_-_44079606.23-P1P2	GAGATCCGCCTCCGCCATGC	2.0	5.0	empirical	XRCC1_-_44079668.23-P1P2|XRCC1_-_44079606.23-P1P2
DNM1L	P1P2	1-2	significant	DNM1L_+_32832245.23-P1P2	GCCGGCCACGGCAATGAATG	1.0	3.0	empirical	DNM1L_-_32832237.23-P1P2	CAGTTCGCCTCCTTCCTCCC	2.0	4.0	empirical	DNM1L_+_32832245.23-P1P2|DNM1L_-_32832237.23-P1P2
NUP88	P1P2	1-2	essential	NUP88_+_5322944.23-P1P2	GCGGCCGCCGAGGGACCGGT	1.0	1.0	essential	NUP88_-_5322557.23-P1P2	ACGCTGCCATACGCGGTCGC	2.0	6.0	essential	NUP88_+_5322944.23-P1P2|NUP88_-_5322557.23-P1P2
SMC2	P1P2	1-2	essential	SMC2_-_106856631.23-P1P2	GGCGGGTGTTGAGAGCGGTG	1.0	3.0	essential	SMC2_+_106856781.23-P1P2	GTTGGGCCGGGCCAGACTTC	2.0	1.0	essential	SMC2_-_106856631.23-P1P2|SMC2_+_106856781.23-P1P2
RNPC3	P1P2	1-2	essential	RNPC3_+_104068769.23-P1P2	GGTGCCTGACCAGAAGGGTT	1.0	10.0	essential	RNPC3_+_104068758.23-P1P2	CGGGGCGACCGAACCCTTCC	2.0	6.0	essential	RNPC3_+_104068769.23-P1P2|RNPC3_+_104068758.23-P1P2
RPL13A	P1	1-2	significant	RPL13A_+_49991194.23-P1	GCGGCCAAGACTCTACCCCA	1.0	9.0	empirical	RPL13A_-_49991095.23-P1	CATTGTAGCCAACCCTAGGC	2.0	1.0	empirical	RPL13A_+_49991194.23-P1|RPL13A_-_49991095.23-P1
PRPF8	P1P2	1-2	essential	PRPF8_+_1588005.23-P1P2	GTCGGGCCGAGTGACCGAAG	1.0	2.0	essential	PRPF8_+_1588152.23-P1P2	GGAAGTGCGCAACCCGAGTC	2.0	1.0	essential	PRPF8_+_1588005.23-P1P2|PRPF8_+_1588152.23-P1P2
ZMAT2	P2	1-2	essential	ZMAT2_+_140083724.23-P2	GAACTGGAGAGTTCTAATAG	1.0	1.0	predicted	ZMAT2_-_140083696.23-P2	TTCTTACTCCAGCCATCTTC	2.0	2.0	predicted	ZMAT2_+_140083724.23-P2|ZMAT2_-_140083696.23-P2
BTF3L4	P1P2	1-2	nonessential	BTF3L4_+_52521967.23-P1P2	GAGACAGAGAAAGACGACGG	1.0	1.0	predicted	BTF3L4_+_52522155.23-P1P2	CCGTGGTGCGGCGAGCGGGC	2.0	2.0	predicted	BTF3L4_+_52521967.23-P1P2|BTF3L4_+_52522155.23-P1P2
METAP2	P1P2	1-2	significant	METAP2_-_95868001.23-P1P2	GCCTCCGGGAGCCACCTGAA	1.0	1.0	empirical	METAP2_+_95868341.23-P1P2	CTGGGGTCGCTGGGCCCGAC	2.0	3.0	empirical	METAP2_-_95868001.23-P1P2|METAP2_+_95868341.23-P1P2
CCT4	P1P2	1-2	essential	CCT4_-_62115399.23-P1P2	GCCACTGGGCTGCTTCTATA	1.0	6.0	essential	CCT4_+_62115687.23-P1P2	GGATTCTGGCCGGCCGCAGC	2.0	4.0	essential	CCT4_-_62115399.23-P1P2|CCT4_+_62115687.23-P1P2
SNAPC1	P1P2	1-2	significant	SNAPC1_-_62229148.23-P1P2	GCTAGTCCGTTAGAGGCGTG	1.0	1.0	empirical	SNAPC1_-_62229166.23-P1P2	GCACGCCTCCGAAGCCCGCC	2.0	2.0	empirical	SNAPC1_-_62229148.23-P1P2|SNAPC1_-_62229166.23-P1P2
MRPL50	P1P2	1-2	significant	MRPL50_+_104160649.23-P1P2	GGGACAAGGAGGTCCGGTTA	1.0	5.0	empirical	MRPL50_+_104160660.23-P1P2	CCTTGTCCTTGCTCTGATCC	2.0	7.0	empirical	MRPL50_+_104160649.23-P1P2|MRPL50_+_104160660.23-P1P2
ROMO1	P1P2	1-2	significant	ROMO1_-_34287382.23-P1P2	GCCCGCGAGCGAGGTGAGGT	1.0	1.0	empirical	ROMO1_-_34287419.23-P1P2	CCCTCTTCGCGTTCCGGCCC	2.0	2.0	empirical	ROMO1_-_34287382.23-P1P2|ROMO1_-_34287419.23-P1P2
SF3B5	P1P2	1-2	essential	SF3B5_-_144416509.23-P1P2	GAGGTCGAAGTGGCCCATGT	1.0	1.0	essential	SF3B5_+_144416685.23-P1P2	CTCTAGCGTTTTACAGGAGC	2.0	5.0	essential	SF3B5_-_144416509.23-P1P2|SF3B5_+_144416685.23-P1P2
MRPL15	P1P2	1-2	significant	MRPL15_-_55047895.23-P1P2	GGGGCCCTGGACCTACTCCG	1.0	7.0	empirical	MRPL15_-_55047812.23-P1P2	TGAGCTGCTCGGAGGCCACC	2.0	3.0	empirical	MRPL15_-_55047895.23-P1P2|MRPL15_-_55047812.23-P1P2
UBE2Z	P1P2	1-2	significant	UBE2Z_+_46985838.23-P1P2	GCTTCGCTTCCGGGACTACT	1.0	3.0	empirical	UBE2Z_-_46985826.23-P1P2	ACCAGAGCGGCCGCTGCTCC	2.0	2.0	empirical	UBE2Z_+_46985838.23-P1P2|UBE2Z_-_46985826.23-P1P2
CDC40	P1P2	1-2	essential	CDC40_+_110501678.23-P1P2	GGACCCTGAACCCGAACCAT	1.0	3.0	essential	CDC40_-_110501684.23-P1P2	TAGGAAGCGGCCAGAGCTGC	2.0	4.0	essential	CDC40_+_110501678.23-P1P2|CDC40_-_110501684.23-P1P2
HSD17B10	P1P2	1-2	essential	HSD17B10_-_53461314.23-P1P2	GTTGTCGCCGGCCACTCCAC	1.0	7.0	essential	HSD17B10_+_53461288.23-P1P2	TCTTGTCGCCGGCCACTCCC	2.0	3.0	essential	HSD17B10_-_53461314.23-P1P2|HSD17B10_+_53461288.23-P1P2
TRAPPC4	P1P2	1-2	nonessential	TRAPPC4_-_118889508.23-P1P2	GCCGAGCGGCAAGGCAGCGA	1.0	1.0	predicted	TRAPPC4_-_118889743.23-P1P2	ACTTCTACAGCACTGGGGCC	2.0	2.0	predicted	TRAPPC4_-_118889508.23-P1P2|TRAPPC4_-_118889743.23-P1P2
GUK1	P1P2	1-2	significant	GUK1_-_228327987.23-P1P2	GGTCACGTAGGTTCAGTGGG	1.0	3.0	empirical	GUK1_-_228328011.23-P1P2	CAGCATCCGGGGCCACCTCC	2.0	1.0	empirical	GUK1_-_228327987.23-P1P2|GUK1_-_228328011.23-P1P2
SAP130	P1P2	1-2	significant	SAP130_+_128785641.23-P1P2	GGCAGCGGCGCTGGAGTGAG	1.0	2.0	empirical	SAP130_+_128785612.23-P1P2	CCGGGGAGCTAGCACTCTGC	2.0	1.0	empirical	SAP130_+_128785641.23-P1P2|SAP130_+_128785612.23-P1P2
RPL13A	P2	1-2	significant	RPL13A_+_49994249.23-P2	GGAGCCCGGGAGGGACAGAC	1.0	1.0	predicted	RPL13A_+_49994109.23-P2	TACGACAAGGTGAGCTATGC	2.0	2.0	predicted	RPL13A_+_49994249.23-P2|RPL13A_+_49994109.23-P2
RPL34	P1P2	1-2	essential	RPL34_-_109541761.23-P1P2	GGGGACGTTGTCTGCAGGTA	1.0	5.0	essential	RPL34_+_109541791.23-P1P2	TACCAATCGGCTGCCATCCC	2.0	6.0	essential	RPL34_-_109541761.23-P1P2|RPL34_+_109541791.23-P1P2
DDN	P1P2	1-2	nonessential	DDN_+_49393129.23-P1P2	GCAGTGGGCGCCGGCTCCCT	1.0	1.0	predicted	DDN_+_49393144.23-P1P2	ACTGCAGAGCCGCGGGCCCC	2.0	2.0	predicted	DDN_+_49393129.23-P1P2|DDN_+_49393144.23-P1P2
RBM25	P1P2	1-2	significant	RBM25_+_73525283.23-P1P2	GCCCAAGCGCCTACTCGCAC	1.0	1.0	empirical	RBM25_-_73525471.23-P1P2	CCAGCTGAGGCACCCGGTCC	2.0	5.0	empirical	RBM25_+_73525283.23-P1P2|RBM25_-_73525471.23-P1P2
DYNLRB1	P2	1-2	essential	DYNLRB1_+_33114045.23-P2	GAGAAAACAAGACCAAGGTT	1.0	1.0	predicted	DYNLRB1_+_33114412.23-P2	CCAGTGTCCTCACAAAGGGC	2.0	2.0	predicted	DYNLRB1_+_33114045.23-P2|DYNLRB1_+_33114412.23-P2
PEX1	P1P2	1-2	significant	PEX1_-_92157440.23-P1P2	GCTGGGATAAGACGAGCCCA	1.0	4.0	empirical	PEX1_+_92157741.23-P1P2	CACATCGTCCCGGAGCGTCC	2.0	2.0	empirical	PEX1_-_92157440.23-P1P2|PEX1_+_92157741.23-P1P2
FOXL2	P1P2	1-2	nonessential	FOXL2_+_138665897.23-P1P2	GGGGTCGTGCTTCGGGAAAC	1.0	1.0	predicted	FOXL2_+_138665948.23-P1P2	TAGTGCGCCAGGAGCCTCGC	2.0	2.0	predicted	FOXL2_+_138665897.23-P1P2|FOXL2_+_138665948.23-P1P2
PRKRIP1	P1	1-2	significant	PRKRIP1_+_102036866.23-P1	GTCGCACCGAGGAGGCGGCT	1.0	1.0	empirical	PRKRIP1_-_102036882.23-P1	AGGAGGCGGCTGGGCTAGCC	2.0	3.0	empirical	PRKRIP1_+_102036866.23-P1|PRKRIP1_-_102036882.23-P1
DAD1	P1P2	1-2	significant	DAD1_+_23058092.23-P1P2	GACGGGTCCTCCAAGAGTTT	1.0	3.0	empirical	DAD1_-_23057953.23-P1P2	GGGCGCTGCAGTTCGGTTAC	2.0	2.0	empirical	DAD1_+_23058092.23-P1P2|DAD1_-_23057953.23-P1P2
SKP1	P1P2	1-2	significant	SKP1_-_133512608.23-P1P2	GAGCCGGGAGGCGTTAGCGA	1.0	3.0	empirical	SKP1_-_133512401.23-P1P2	TGTTCTTCGGGAGACCCTAC	2.0	5.0	empirical	SKP1_-_133512608.23-P1P2|SKP1_-_133512401.23-P1P2
HYOU1	P1P2	1-2	significant	HYOU1_-_118927773.23-P1P2	GCCCAGCTCTGGGACAGACG	1.0	3.0	empirical	HYOU1_+_118927661.23-P1P2	CCGGAGCTCGCACGCTGTCC	2.0	1.0	empirical	HYOU1_-_118927773.23-P1P2|HYOU1_+_118927661.23-P1P2
TXN	P1P2	1-2	significant	TXN_-_113018848.23-P1P2	GCCCGGCGTGCGTGTGGCGG	1.0	1.0	empirical	TXN_+_113018808.23-P1P2	TTTATAAACTGGCACGCCCC	2.0	4.0	empirical	TXN_-_113018848.23-P1P2|TXN_+_113018808.23-P1P2
AKIRIN2	P1P2	1-2	significant	AKIRIN2_-_88411464.23-P1P2	GGACGGGTGACGAAAGAAGA	1.0	5.0	empirical	AKIRIN2_+_88411936.23-P1P2	TCGTAGAACTCTCCCACCCC	2.0	1.0	empirical	AKIRIN2_-_88411464.23-P1P2|AKIRIN2_+_88411936.23-P1P2
MKI67IP	P1P2	1-2	essential	MKI67IP_+_122494437.23-P1P2	GAGCGCCGCGTGGTTAGCGT	1.0	1.0	essential	MKI67IP_-_122494239.23-P1P2	GGGCGCCCCTTGCCTTCGTC	2.0	2.0	essential	MKI67IP_+_122494437.23-P1P2|MKI67IP_-_122494239.23-P1P2
DRG1	P1P2	1-2	significant	DRG1_+_31795995.23-P1P2	GCAGAACAGGAGCCAAACAC	1.0	3.0	empirical	DRG1_+_31795837.23-P1P2	GTGTTCCGACTGCCCTCTGC	2.0	5.0	empirical	DRG1_+_31795995.23-P1P2|DRG1_+_31795837.23-P1P2
NOLC1	P1P2	1-2	significant	NOLC1_+_103912187.23-P1P2	GCAGGTCGCTGGGAACCACG	1.0	4.0	empirical	NOLC1_-_103912173.23-P1P2	CCATCCTCCAGGCAATACGC	2.0	3.0	empirical	NOLC1_+_103912187.23-P1P2|NOLC1_-_103912173.23-P1P2
MMS22L	P1P2	1-2	essential	MMS22L_+_97730632.23-P1P2	GGCTGCAGAGCCCGACTTAG	1.0	9.0	essential	MMS22L_-_97730942.23-P1P2	CGGGTCCTTGCTGCAGCCGC	2.0	4.0	essential	MMS22L_+_97730632.23-P1P2|MMS22L_-_97730942.23-P1P2
TXNL4A	P1P2	1-2	significant	TXNL4A_-_77748145.23-P1P2	GGAGCCGCGGCCCCTCCTCG	1.0	10.0	empirical	TXNL4A_+_77748133.23-P1P2	CTCCTCGGGGAACAGCTCGC	2.0	6.0	empirical	TXNL4A_-_77748145.23-P1P2|TXNL4A_+_77748133.23-P1P2
POLR2F	P1P2	1-2	significant	POLR2F_-_38349919.23-P1P2	GTCTAGGGGCAATGTCTGAG	1.0	5.0	empirical	POLR2F_-_38349783.23-P1P2	CAGCGACCCCGCTGCGCCCC	2.0	7.0	empirical	POLR2F_-_38349919.23-P1P2|POLR2F_-_38349783.23-P1P2
HAUS7	P1	1-2	essential	HAUS7_+_152735963.23-P1	GGGCGGCGACGACTACTCAG	1.0	1.0	essential	HAUS7_+_152736011.23-P1	TGTTTCGCGCTCCGAGCCGC	2.0	4.0	essential	HAUS7_+_152735963.23-P1|HAUS7_+_152736011.23-P1
TUBD1	P1P2	1-2	significant	TUBD1_+_57970066.23-P1P2	GACCGGACAGAAGCGCTGGT	1.0	7.0	empirical	TUBD1_+_57970056.23-P1P2	CCAGACGCCGACCAGCGCTC	2.0	3.0	empirical	TUBD1_+_57970066.23-P1P2|TUBD1_+_57970056.23-P1P2
DTL	P1P2	1-2	significant	DTL_+_212209345.23-P1P2	GAGTCGGCCCTGGTCGGAGG	1.0	6.0	empirical	DTL_-_212209126.23-P1P2	ACTCCCGCCACTGTAAGCCC	2.0	4.0	empirical	DTL_+_212209345.23-P1P2|DTL_-_212209126.23-P1P2
TPRKB	P1P2	1-2	significant	TPRKB_+_73964387.23-P1P2	GTAACGGGCAGGCTCGGGAG	1.0	6.0	empirical	TPRKB_-_73964451.23-P1P2	AGACGCACTGGGGGCCGGAC	2.0	2.0	empirical	TPRKB_+_73964387.23-P1P2|TPRKB_-_73964451.23-P1P2
WDTC1	P1P2	1-2	significant	WDTC1_-_27561600.23-P1P2	GGCCCCGGGTGTCCCGAGAG	1.0	3.0	empirical	WDTC1_-_27561699.23-P1P2	CCCCGGACTCCCACAGCCTC	2.0	6.0	empirical	WDTC1_-_27561600.23-P1P2|WDTC1_-_27561699.23-P1P2
EIF5A	P1P2	1-2	significant	EIF5A_-_7211217.23-P1P2	GAGCGGCGCGAGGTGAGGAG	1.0	2.0	empirical	EIF5A_-_7210932.23-P1P2	CACTGACCAACCAAGCAGCC	2.0	1.0	empirical	EIF5A_-_7211217.23-P1P2|EIF5A_-_7210932.23-P1P2
COASY	P1P2	1-2	significant	COASY_-_40714203.23-P1P2	GGCAGCCAGGGAAGCCTCCG	1.0	2.0	empirical	COASY_+_40714195.23-P1P2	CCGCGGTGGTGCAAGTGGAC	2.0	5.0	empirical	COASY_-_40714203.23-P1P2|COASY_+_40714195.23-P1P2
CDC26	P1P2	1-2	significant	CDC26_+_116037656.23-P1P2	GGGCCGGCTTGAAAAGAGGT	1.0	4.0	empirical	CDC26_+_116037488.23-P1P2	CTAGCTCCAGGCCTGTACCC	2.0	6.0	empirical	CDC26_+_116037656.23-P1P2|CDC26_+_116037488.23-P1P2
HLA-C	P1P2	1-2	nonessential	HLA-C_-_31239876.23-P1P2	GTCTGGGGAGAATGTGAGTC	1.0	1.0	predicted	HLA-C_-_31239308.23-P1P2	AGAGTCTCCCCGTCTGAGAC	2.0	2.0	predicted	HLA-C_-_31239876.23-P1P2|HLA-C_-_31239308.23-P1P2
PPRC1	P1P2	1-2	significant	PPRC1_-_103892809.23-P1P2	GCAGCGATCAGAGCAGCGCT	1.0	1.0	empirical	PPRC1_-_103892819.23-P1P2	CTGAACACCCAGCGCTGCTC	2.0	3.0	empirical	PPRC1_-_103892809.23-P1P2|PPRC1_-_103892819.23-P1P2
COPZ1	P1	1-2	essential	COPZ1_-_54719176.23-P1	GCGGGGAGAGGGCATAGAGT	1.0	3.0	essential	COPZ1_+_54719129.23-P1	TGGTTTAGAGTAGGAAGCCC	2.0	1.0	essential	COPZ1_-_54719176.23-P1|COPZ1_+_54719129.23-P1
COPS2	P1P2	1-2	significant	COPS2_-_49447577.23-P1P2	GCCGGGCCCGGTGCGGGAAC	1.0	1.0	empirical	COPS2_+_49447762.23-P1P2	TGTCAGACATCTTGGCCGGC	2.0	2.0	empirical	COPS2_-_49447577.23-P1P2|COPS2_+_49447762.23-P1P2
OGT	P1P2	1-2	significant	OGT_+_70753018.23-P1P2	GCTCTGGAGGGCTTGAGCGG	1.0	2.0	empirical	OGT_+_70752948.23-P1P2	CCATTTCAAGACCGTACTAC	2.0	6.0	empirical	OGT_+_70753018.23-P1P2|OGT_+_70752948.23-P1P2
SMC4	P2	1-2	essential	SMC4_-_160122206.23-P2	GCTTCTGTCTATCACATAAG	1.0	1.0	predicted	SMC4_-_160122169.23-P2	TTCTGGATACATAGAAATTC	2.0	2.0	predicted	SMC4_-_160122206.23-P2|SMC4_-_160122169.23-P2
EIF3J	P1P2	1-2	significant	EIF3J_+_44829331.23-P1P2	GCGAGGAGTTAGCACGGCGG	1.0	1.0	empirical	EIF3J_-_44829398.23-P1P2	CCATCTCGAGCCGGGTGTGC	2.0	4.0	empirical	EIF3J_+_44829331.23-P1P2|EIF3J_-_44829398.23-P1P2
NOL7	P1P2	1-2	significant	NOL7_-_13615647.23-P1P2	GGCGTCGGCGGAGGCGATGG	1.0	3.0	empirical	NOL7_-_13615654.23-P1P2	TCGTCCACCATCGCCTCCGC	2.0	6.0	empirical	NOL7_-_13615647.23-P1P2|NOL7_-_13615654.23-P1P2
TPT1	P1P2	1-2	significant	TPT1_-_45915260.23-P1P2	GTTAGCACGAGCCTGAAACT	1.0	5.0	empirical	TPT1_-_45915532.23-P1P2	ACCCCTACCCGCTGGCGTGC	2.0	1.0	empirical	TPT1_-_45915260.23-P1P2|TPT1_-_45915532.23-P1P2
EXOSC6	P1P2	1-2	essential	EXOSC6_+_70285844.23-P1P2	GACGGAAGAACCAGTGGATG	1.0	7.0	essential	EXOSC6_-_70285804.23-P1P2	TGCCTGGGGATCACCGCCGC	2.0	3.0	essential	EXOSC6_+_70285844.23-P1P2|EXOSC6_-_70285804.23-P1P2
URM1	P1P2	1-2	significant	URM1_-_131133686.23-P1P2	GGCGCCCTTGTCAGTGGAGG	1.0	5.0	empirical	URM1_-_131133683.23-P1P2	CCACTGACAAGGGCGCAGCC	2.0	3.0	empirical	URM1_-_131133686.23-P1P2|URM1_-_131133683.23-P1P2
ZNRD1	P1P2	1-2	essential	ZNRD1_+_30029087.23-P1P2	GGACTTGGAACCCTTTCCAG	1.0	5.0	essential	ZNRD1_-_30029063.23-P1P2	TGGGCTAGAGCGCCAGCTCC	2.0	8.0	essential	ZNRD1_+_30029087.23-P1P2|ZNRD1_-_30029063.23-P1P2
CHEK1	P1P2	1-2	essential	CHEK1_-_125495912.23-P1P2	GGGCAAAGGACAGTCCGGTG	1.0	4.0	essential	CHEK1_-_125495934.23-P1P2	TACTCTACCGGCCGCCCTTC	2.0	3.0	essential	CHEK1_-_125495912.23-P1P2|CHEK1_-_125495934.23-P1P2
MRPL2	P1P2	1-2	significant	MRPL2_+_43027129.23-P1P2	GGCAGCTTGGCTAAAAGTAA	1.0	1.0	empirical	MRPL2_+_43027142.23-P1P2	AGCTGCTCGGTGCTCCTAGC	2.0	2.0	empirical	MRPL2_+_43027129.23-P1P2|MRPL2_+_43027142.23-P1P2
WDR43	P1P2	1-2	significant	WDR43_-_29117577.23-P1P2	GGAGCAGCAATGGCGGCGGG	1.0	2.0	empirical	WDR43_-_29117980.23-P1P2	TCACTGCCCTCGCGGCAGGC	2.0	4.0	empirical	WDR43_-_29117577.23-P1P2|WDR43_-_29117980.23-P1P2
GAB2	P1P2	1-2	significant	GAB2_-_78128828.23-P1P2	GGCGCGGGCTCGGGCAGCTG	1.0	4.0	empirical	GAB2_-_78128897.23-P1P2	CCTAGTCCCCGCCGGGCCGC	2.0	1.0	empirical	GAB2_-_78128828.23-P1P2|GAB2_-_78128897.23-P1P2
FAM133B	P1P2	1-2	nonessential	FAM133B_+_92219692.23-P1P2	GCTCTCTAGGCGGAGTGGGG	1.0	1.0	predicted	FAM133B_-_92219443.23-P1P2	ATCCCAGATGCGCGTGCGCC	2.0	2.0	predicted	FAM133B_+_92219692.23-P1P2|FAM133B_-_92219443.23-P1P2
HDAC7	P1P2	1-2	significant	HDAC7_-_48213211.23-P1P2	GTCGTCCTCCCCGGGAACAG	1.0	3.0	empirical	HDAC7_+_48213344.23-P1P2	ACCCGGAGCCTGCCAGAGCC	2.0	10.0	empirical	HDAC7_-_48213211.23-P1P2|HDAC7_+_48213344.23-P1P2
MRPL44	P1P2	1-2	significant	MRPL44_+_224822378.23-P1P2	GACCCTGAGACCTCTTCCCG	1.0	4.0	empirical	MRPL44_-_224822384.23-P1P2	GAGGTGGCTCCTACCGGCGC	2.0	3.0	empirical	MRPL44_+_224822378.23-P1P2|MRPL44_-_224822384.23-P1P2
LSM5	P2	1-2	significant	LSM5_+_32534880.23-P2	GGGGGCTTACGTGACCCGGG	1.0	5.0	empirical	LSM5_-_32534855.23-P2	CGGGACCTGGAGGTGCGGCC	2.0	2.0	empirical	LSM5_+_32534880.23-P2|LSM5_-_32534855.23-P2
NASP	P1P2	1-2	nonessential	NASP_+_46049787.23-P1P2	GGAGGTGGCGAACCAGCGAA	1.0	1.0	predicted	NASP_-_46049966.23-P1P2	ACCGGTCTGCCCCTTCTCCC	2.0	2.0	predicted	NASP_+_46049787.23-P1P2|NASP_-_46049966.23-P1P2
INTS7	P1P2	1-2	significant	INTS7_+_212208849.23-P1P2	GAAAACCAGCAAGAAGGCGG	1.0	1.0	empirical	INTS7_+_212208875.23-P1P2	CGCGCTGTCAAGCCCTGTTC	2.0	4.0	empirical	INTS7_+_212208849.23-P1P2|INTS7_+_212208875.23-P1P2
WBP11	P2	1-2	essential	WBP11_-_14946707.23-P2	GGTCTCTCTCACCATTATCA	1.0	1.0	predicted	WBP11_+_14946647.23-P2	TCATCTGCACATACCTGACC	2.0	2.0	predicted	WBP11_-_14946707.23-P2|WBP11_+_14946647.23-P2
SNRPC	P1P2	1-2	significant	SNRPC_+_34725323.23-P1P2	GTTCGGGGCCCCACTCACTT	1.0	3.0	empirical	SNRPC_-_34725456.23-P1P2	CCGTCCACCCGGCCCAGATC	2.0	2.0	empirical	SNRPC_+_34725323.23-P1P2|SNRPC_-_34725456.23-P1P2
ESF1	P2	1-2	essential	ESF1_+_13763214.23-P2	GAACAAAGGACATTAGACTC	1.0	4.0	essential	ESF1_+_13763379.23-P2	ATAGAATTATCTAAATCAGC	2.0	3.0	essential	ESF1_+_13763214.23-P2|ESF1_+_13763379.23-P2
KANSL3	P1P2	1-2	essential	KANSL3_+_97304019.23-P1P2	GGCGCGCGGCCGTAAGACCG	1.0	1.0	essential	KANSL3_+_97303993.23-P1P2	CTCGAAGCCAACGCTGCTCC	2.0	3.0	essential	KANSL3_+_97304019.23-P1P2|KANSL3_+_97303993.23-P1P2
MOK	P1P2	1-2	nonessential	MOK_+_102771458.23-P1P2	GTGACAGGGACACAACATGG	1.0	1.0	predicted	MOK_+_102771461.23-P1P2	TGTTGTGTCCCTGTCACCCC	2.0	2.0	predicted	MOK_+_102771458.23-P1P2|MOK_+_102771461.23-P1P2
DDB1	P1	1-2	significant	DDB1_+_61100555.23-P1	GGGCCTGCAACGTGTCTCTG	1.0	1.0	empirical	DDB1_+_61100263.23-P1	TCCATTCGCCGGGCCCACTC	2.0	10.0	empirical	DDB1_+_61100555.23-P1|DDB1_+_61100263.23-P1
NCOA4	P1P2	1-2	nonessential	NCOA4_+_51565254.23-P1P2	GGGCGATCCGAGGAGACCTT	1.0	1.0	predicted	NCOA4_-_51565283.23-P1P2	CTCCAGGCGATCCGAGGAGC	2.0	2.0	predicted	NCOA4_+_51565254.23-P1P2|NCOA4_-_51565283.23-P1P2
PRPF4B	P1P2	1-2	significant	PRPF4B_+_4021605.23-P1P2	GGGCGGCTCCCGGACGGTGG	1.0	1.0	empirical	PRPF4B_+_4021634.23-P1P2	CCGAGGAGTCAGGAAGTTCC	2.0	3.0	empirical	PRPF4B_+_4021605.23-P1P2|PRPF4B_+_4021634.23-P1P2
IMP4	P1P2	1-2	essential	IMP4_+_131100464.23-P1P2	GTGGGTCCGGGAGAATCTGT	1.0	1.0	essential	IMP4_-_131100512.23-P1P2	ACCATCTTGAGTGCCGCTTC	2.0	4.0	essential	IMP4_+_131100464.23-P1P2|IMP4_-_131100512.23-P1P2
LTV1	P1P2	1-2	essential	LTV1_+_144164541.23-P1P2	GAAGTCCGGCGGGGAGACCA	1.0	1.0	essential	LTV1_+_144164581.23-P1P2	TGTTGGGGGTGAGCGCCGCC	2.0	2.0	essential	LTV1_+_144164541.23-P1P2|LTV1_+_144164581.23-P1P2
DNAJA1	P2	1-2	significant	DNAJA1_-_33026888.23-P2	GTATGACAAAGGAGGAGAAC	1.0	1.0	predicted	DNAJA1_-_33027087.23-P2	ACATGTAAACAAGCATTTAC	2.0	2.0	predicted	DNAJA1_-_33026888.23-P2|DNAJA1_-_33027087.23-P2
DHDDS	P1P2	1-2	significant	DHDDS_-_26758867.23-P1P2	GGCGCCCAGCGGAGCTAATC	1.0	1.0	empirical	DHDDS_-_26758897.23-P1P2	CTAGTTCACCCCTTCAGTTC	2.0	3.0	empirical	DHDDS_-_26758867.23-P1P2|DHDDS_-_26758897.23-P1P2
PTCD1	P1	1-2	significant	PTCD1_+_99063727.23-P1	GGAGTGTCCGGCCCCAGGTA	1.0	1.0	empirical	PTCD1_-_99063736.23-P1	GGTAAGGCTGTTTGGACTCC	2.0	5.0	empirical	PTCD1_+_99063727.23-P1|PTCD1_-_99063736.23-P1
TOP1	P1P2	1-2	significant	TOP1_+_39657538.23-P1P2	GACGGCTGAGGCTGCTACCA	1.0	4.0	empirical	TOP1_+_39657511.23-P1P2	CCCGGCAGTCAGGCAGCGTC	2.0	3.0	empirical	TOP1_+_39657538.23-P1P2|TOP1_+_39657511.23-P1P2
CAP1	P1P2	1-2	significant	CAP1_-_40506478.23-P1P2	GGAGGCGGAACTCTGAGGTG	1.0	3.0	empirical	CAP1_+_40506449.23-P1P2	GAGGTGAGGCGGAACTCTGC	2.0	2.0	empirical	CAP1_-_40506478.23-P1P2|CAP1_+_40506449.23-P1P2
NDUFA4	P1P2	1-2	significant	NDUFA4_-_10979611.23-P1P2	GCCCGACGCAAGAAGGACAA	1.0	3.0	empirical	NDUFA4_-_10979541.23-P1P2	TCCGTCAGACCAGACCCTGC	2.0	4.0	empirical	NDUFA4_-_10979611.23-P1P2|NDUFA4_-_10979541.23-P1P2
DPH3	P1P2	1-2	nonessential	DPH3_-_16306427.23-P1P2	GGTAACGCCCCAGCAGTCCG	1.0	1.0	predicted	DPH3_+_16306434.23-P1P2	AGGGTTTAACTTCGCCGGAC	2.0	2.0	predicted	DPH3_-_16306427.23-P1P2|DPH3_+_16306434.23-P1P2
FAM32A	P1P2	1-2	significant	FAM32A_-_16296348.23-P1P2	GGTGAGGCCCGAGGGCCCGC	1.0	2.0	empirical	FAM32A_-_16296256.23-P1P2	TGACACTCTCCAGTGCTTCC	2.0	3.0	empirical	FAM32A_-_16296348.23-P1P2|FAM32A_-_16296256.23-P1P2
NCAPH	P1P2	1-2	essential	NCAPH_-_97001726.23-P1P2	GGCCCTGCGGCTGACAGCAG	1.0	5.0	essential	NCAPH_+_97001557.23-P1P2	AGGAAAGATGGGACCTCCCC	2.0	3.0	essential	NCAPH_-_97001726.23-P1P2|NCAPH_+_97001557.23-P1P2
RPL29	P1P2	1-2	significant	RPL29_-_52029883.23-P1P2	GCAACACTCACCATAAGCCG	1.0	3.0	empirical	RPL29_+_52029718.23-P1P2	TCCCCCTCCTAGGACCTAGC	2.0	8.0	empirical	RPL29_-_52029883.23-P1P2|RPL29_+_52029718.23-P1P2
TRMT112	P1P2	1-2	significant	TRMT112_+_64085002.23-P1P2	GGGCCTGGCGAGAGTTTGTG	1.0	1.0	empirical	TRMT112_-_64084926.23-P1P2	CCAGGTACCCGCCGGCGGCC	2.0	3.0	empirical	TRMT112_+_64085002.23-P1P2|TRMT112_-_64084926.23-P1P2
CAPZB	P1P2	1-2	significant	CAPZB_-_19812015.23-P1P2	GCCGGCGCTTCCACTTCCCC	1.0	1.0	empirical	CAPZB_-_19811972.23-P1P2	CTGACGCCGGGACCGGGACC	2.0	2.0	empirical	CAPZB_-_19812015.23-P1P2|CAPZB_-_19811972.23-P1P2
DTYMK	P1P2	1-2	significant	DTYMK_+_242626191.23-P1P2	GGGGCGGTGGACAGTCATGG	1.0	4.0	empirical	DTYMK_+_242626160.23-P1P2	TCCAGCACTATGAGAGCCCC	2.0	5.0	empirical	DTYMK_+_242626191.23-P1P2|DTYMK_+_242626160.23-P1P2
SPDYE2	ENST00000341656.4	1-2	nonessential	SPDYE2_-_102196628.23-ENST00000341656.4	GTCCTGTTCTTTCCAAAAAC	1.0	1.0	predicted	SPDYE2_+_102196618.23-ENST00000341656.4	AAAACAGGAAACTTCCAATC	2.0	2.0	predicted	SPDYE2_-_102196628.23-ENST00000341656.4|SPDYE2_+_102196618.23-ENST00000341656.4
ALG1L	ENST00000340333.3	1-2	nonessential	ALG1L_-_125655482.23-ENST00000340333.3	GCAGCCCAAAAAACAAAGCA	1.0	1.0	predicted	ALG1L_-_125655452.23-ENST00000340333.3	CCTCACCTCTCTGTCTTGCC	2.0	2.0	predicted	ALG1L_-_125655482.23-ENST00000340333.3|ALG1L_-_125655452.23-ENST00000340333.3
MTRNR2L1	P1P2	1-2	nonessential	MTRNR2L1_+_22022917.23-P1P2	GGCTTCTTCTAGGCCAACTT	1.0	1.0	predicted	MTRNR2L1_+_22023007.23-P1P2	CACATCACATTGGACCAATC	2.0	2.0	predicted	MTRNR2L1_+_22022917.23-P1P2|MTRNR2L1_+_22023007.23-P1P2
TOMM20	P1P2	1-2	significant	TOMM20_-_235292152.23-P1P2	GGCGGGCCAGGAACACAGAA	1.0	4.0	empirical	TOMM20_-_235292128.23-P1P2	TCGGGTGTGAGCTGCGCCGC	2.0	3.0	empirical	TOMM20_-_235292152.23-P1P2|TOMM20_-_235292128.23-P1P2
DDX6	P1P2	1-2	significant	DDX6_+_118661671.23-P1P2	GCGGGCGGAGGTTTCCGAGG	1.0	1.0	empirical	DDX6_+_118661800.23-P1P2	TACCTCCTCCGCTGCCCGCC	2.0	3.0	empirical	DDX6_+_118661671.23-P1P2|DDX6_+_118661800.23-P1P2
MED31	P1P2	1-2	essential	MED31_-_6554743.23-P1P2	GCCCTGCCAAGAGTAAGGCC	1.0	8.0	essential	MED31_-_6554548.23-P1P2	CCTTGATTGGTTTTCTGCTC	2.0	7.0	essential	MED31_-_6554743.23-P1P2|MED31_-_6554548.23-P1P2
RPL36	P1P2	1-2	essential	RPL36_+_5690269.23-P1P2	GGAACTCCGGGATATCTACT	1.0	6.0	essential	RPL36_+_5690349.23-P1P2	GCACTGCCGGTATCCGCCGC	2.0	1.0	essential	RPL36_+_5690269.23-P1P2|RPL36_+_5690349.23-P1P2
METTL14	P1P2	1-2	significant	METTL14_-_119606733.23-P1P2	GCCGGGAGCGGCAGAAGTTA	1.0	4.0	empirical	METTL14_+_119606842.23-P1P2	TCTCTACCTGCCGCTGTTAC	2.0	7.0	empirical	METTL14_-_119606733.23-P1P2|METTL14_+_119606842.23-P1P2
PPARGC1B	P1P2	1-2	significant	PPARGC1B_+_149110158.23-P1P2	GGCACGCGCCGGGAGACCTC	1.0	8.0	empirical	PPARGC1B_+_149110296.23-P1P2	CGGTGTGGGGTACCCTCAGC	2.0	4.0	empirical	PPARGC1B_+_149110158.23-P1P2|PPARGC1B_+_149110296.23-P1P2
SFPQ	P1P2	1-2	significant	SFPQ_-_35658705.23-P1P2	GAGAAGACGCTCAGGAAACG	1.0	3.0	empirical	SFPQ_-_35658295.23-P1P2	GGAGTAGGCAGCGCACCACC	2.0	7.0	empirical	SFPQ_-_35658705.23-P1P2|SFPQ_-_35658295.23-P1P2
SF3B4	P1P2	1-2	essential	SF3B4_+_149899609.23-P1P2	GCGAGCGGAATCAGGGTAAC	1.0	4.0	essential	SF3B4_+_149899616.23-P1P2	TGATTCCGCTCGGAGATCGC	2.0	1.0	essential	SF3B4_+_149899609.23-P1P2|SF3B4_+_149899616.23-P1P2
KDM8	P1P2	1-2	significant	KDM8_+_27215335.23-P1P2	GGCTGGTTGCCTAAAAGCAG	1.0	3.0	empirical	KDM8_+_27215236.23-P1P2	TTACGGCGGGCTGCTGTGCC	2.0	4.0	empirical	KDM8_+_27215335.23-P1P2|KDM8_+_27215236.23-P1P2
DDX51	P1P2	1-2	significant	DDX51_+_132628798.23-P1P2	GCGGTACCCGGGCCCCGATG	1.0	1.0	empirical	DDX51_+_132628854.23-P1P2	GGGACTCGGGCGTGGCGCGC	2.0	6.0	empirical	DDX51_+_132628798.23-P1P2|DDX51_+_132628854.23-P1P2
C12orf60	P1P2	1-2	essential	C12orf60_-_14956657.23-P1P2	GGTCCTGTCTCTCGAGTTGG	1.0	3.0	essential	C12orf60_-_14956629.23-P1P2	CTCAGTTAGCAGCTATCTTC	2.0	5.0	essential	C12orf60_-_14956657.23-P1P2|C12orf60_-_14956629.23-P1P2
PRDM10	P1P2	1-2	significant	PRDM10_+_129872660.23-P1P2	GCTATCACCCCTAGGGAGAG	1.0	4.0	empirical	PRDM10_-_129872675.23-P1P2	CTAGGGAGAGAGGATCGGGC	2.0	3.0	empirical	PRDM10_+_129872660.23-P1P2|PRDM10_-_129872675.23-P1P2
SARS2	P1P2	1-2	significant	SARS2_+_39421325.23-P1P2	GGCCTTTGCTGACTCGTCGG	1.0	5.0	empirical	SARS2_-_39421318.23-P1P2	CGGGGAGGCTGCATCTCCAC	2.0	1.0	empirical	SARS2_+_39421325.23-P1P2|SARS2_-_39421318.23-P1P2
MT2A	P1P2	1-2	significant	MT2A_+_56642522.23-P1P2	GGTCGGGACAGGTTGCACGC	1.0	1.0	predicted	MT2A_+_56642728.23-P1P2	TTCTAGGTTATTCGGAGCCC	2.0	2.0	predicted	MT2A_+_56642522.23-P1P2|MT2A_+_56642728.23-P1P2
SEPSECS	P1P2	1-2	significant	SEPSECS_-_25162088.23-P1P2	GACTCGCCGCCTGGACGGTA	1.0	3.0	empirical	SEPSECS_-_25161998.23-P1P2	CTGTCATGAACCGCGAGAGC	2.0	2.0	empirical	SEPSECS_-_25162088.23-P1P2|SEPSECS_-_25161998.23-P1P2
PALB2	P1P2	1-2	significant	PALB2_-_23652582.23-P1P2	GAGGCGCCCCAGGAAGGAAT	1.0	3.0	empirical	PALB2_+_23652295.23-P1P2	CCTCAGCCCTAAGAGGAGGC	2.0	5.0	empirical	PALB2_-_23652582.23-P1P2|PALB2_+_23652295.23-P1P2
EIF5	P2	1-2	significant	EIF5_-_103803091.23-P2	GATGACCGTTACATTGTCAA	1.0	3.0	empirical	EIF5_+_103803074.23-P2	TTACATTGTCAATGGATCTC	2.0	1.0	empirical	EIF5_-_103803091.23-P2|EIF5_+_103803074.23-P2
PDCD6IP	P1P2	1-2	significant	PDCD6IP_+_33840165.23-P1P2	GGACCGCGGACAGCTTACGA	1.0	2.0	empirical	PDCD6IP_+_33840649.23-P1P2	TTGGTCGGCGAGGGCTCCGC	2.0	2.0	empirical	PDCD6IP_+_33840165.23-P1P2|PDCD6IP_+_33840649.23-P1P2
SF3B1	P1P2	1-2	significant	SF3B1_-_198299356.23-P1P2	GTGGGGACGACAGTGTCGAG	1.0	9.0	empirical	SF3B1_-_198299753.23-P1P2	GTTCCGTCTGTGTGTTCGAC	2.0	6.0	empirical	SF3B1_-_198299356.23-P1P2|SF3B1_-_198299753.23-P1P2
USP39	P2	1-2	essential	USP39_-_85829973.23-P2	GCGCGTCACGGGGGAAACGT	1.0	10.0	essential	USP39_-_85830050.23-P2	CTAGTCATCTCGGTTTTAGC	1.0	1.0	predicted	USP39_-_85829973.23-P2|USP39_-_85830050.23-P2
CHMP5	P1P2	1-2	nonessential	CHMP5_+_33265229.23-P1P2	GCCCAGGACCCGAAATGAAG	1.0	1.0	predicted	CHMP5_-_33265093.23-P1P2	GAAGAGTCGGTTCATCTTGC	2.0	2.0	predicted	CHMP5_+_33265229.23-P1P2|CHMP5_-_33265093.23-P1P2
DDX20	P1P2	1-2	essential	DDX20_-_112298588.23-P1P2	GTCGGGAGCCTTAGCAGCAG	1.0	1.0	essential	DDX20_-_112298555.23-P1P2	CCGCCATGGTAGCCGCGCCC	2.0	2.0	essential	DDX20_-_112298588.23-P1P2|DDX20_-_112298555.23-P1P2
NAT10	P1P2	1-2	significant	NAT10_-_34127188.23-P1P2	GTGTCTACCAGTTCCTGAGA	1.0	1.0	empirical	NAT10_-_34127246.23-P1P2	CTAGCGTATGCCTGGTGTCC	2.0	2.0	empirical	NAT10_-_34127188.23-P1P2|NAT10_-_34127246.23-P1P2
PIK3C3	P1P2	1-2	significant	PIK3C3_-_39535233.23-P1P2	GGTACCTAAGTTCCCGCTGT	1.0	4.0	empirical	PIK3C3_+_39535224.23-P1P2	CTGTAGGTGGTACCTTTGCC	2.0	2.0	empirical	PIK3C3_-_39535233.23-P1P2|PIK3C3_+_39535224.23-P1P2
PRPF18	P1P2	1-2	essential	PRPF18_-_13629033.23-P1P2	GCGCGGCCGCCGGCCCAGTG	1.0	2.0	essential	PRPF18_+_13629281.23-P1P2	CTGGTAGGCCCCCTTAGATC	2.0	8.0	essential	PRPF18_-_13629033.23-P1P2|PRPF18_+_13629281.23-P1P2
PSMD13	P1P2	1-2	significant	PSMD13_-_237015.23-P1P2	GCCCCGCGGTGCTGACATCC	1.0	2.0	empirical	PSMD13_+_237011.23-P1P2	GGTTGTTCTTCTGTGCCGGC	2.0	1.0	empirical	PSMD13_-_237015.23-P1P2|PSMD13_+_237011.23-P1P2
RPS25	P1P2	1-2	nonessential	RPS25_+_118888977.23-P1P2	GTCGCAATGGTAAGCTTCAG	1.0	1.0	predicted	RPS25_+_118888990.23-P1P2	TTGCGAAGCTCGGAGAATAC	2.0	2.0	predicted	RPS25_+_118888977.23-P1P2|RPS25_+_118888990.23-P1P2
NCAPD2	P1P2	1-2	essential	NCAPD2_+_6603301.23-P1P2	GTACCTGGGGATCTCACCCG	1.0	1.0	essential	NCAPD2_-_6603320.23-P1P2	GGGGATCTCACCCGCGGCTC	2.0	2.0	essential	NCAPD2_+_6603301.23-P1P2|NCAPD2_-_6603320.23-P1P2
DDX23	P1P2	1-2	essential	DDX23_+_49245881.23-P1P2	GACGTTGAGGCCGCGTTGGG	1.0	1.0	essential	DDX23_+_49245865.23-P1P2	CCCTGAGTCTGAACCGCCCC	2.0	3.0	essential	DDX23_+_49245881.23-P1P2|DDX23_+_49245865.23-P1P2
TAF8	P1P2	1-2	significant	TAF8_-_42018330.23-P1P2	GGGTGGCTCCGGAACGGTAA	1.0	1.0	empirical	TAF8_+_42018316.23-P1P2	GAACGGTAAGGGCAGGAAGC	2.0	2.0	empirical	TAF8_-_42018330.23-P1P2|TAF8_+_42018316.23-P1P2
GBF1	P1P2	1-2	essential	GBF1_-_104005325.23-P1P2	GAGCTGACAGGGAAGGTACC	1.0	5.0	essential	GBF1_+_104005322.23-P1P2	GCTCTACTGCCCGTCCCGGC	2.0	1.0	essential	GBF1_-_104005325.23-P1P2|GBF1_+_104005322.23-P1P2
GTPBP4	P1P2	1-2	significant	GTPBP4_-_1034422.23-P1P2	GGTGCATACGGCTGCCGGCA	1.0	1.0	empirical	GTPBP4_+_1034604.23-P1P2	CGTACTCGGGATCATTTCCC	2.0	2.0	empirical	GTPBP4_-_1034422.23-P1P2|GTPBP4_+_1034604.23-P1P2
NEDD8	P1P2	1-2	essential	NEDD8_+_24701514.23-P1P2	GCAGCGGCGACCGGAGCGGT	1.0	1.0	essential	NEDD8_+_24701539.23-P1P2	TCCAGCACTCTTGCCTGCAC	2.0	3.0	essential	NEDD8_+_24701514.23-P1P2|NEDD8_+_24701539.23-P1P2
KLHL11	P1P2	1-2	nonessential	KLHL11_-_40021667.23-P1P2	GCCACAGCCTCGGAACGATG	1.0	1.0	predicted	KLHL11_+_40021619.23-P1P2	TCTTGACGCCGCTGCGCCCC	2.0	2.0	predicted	KLHL11_-_40021667.23-P1P2|KLHL11_+_40021619.23-P1P2
MCM3	P1P2	1-2	essential	MCM3_-_52149354.23-P1P2	GGGCCGGGCCGCGTCCGCAG	1.0	8.0	essential	MCM3_-_52149307.23-P1P2	GACCGTGTGCCGCAGCGGAC	2.0	4.0	essential	MCM3_-_52149354.23-P1P2|MCM3_-_52149307.23-P1P2
SLC4A5	P2	1-2	nonessential	SLC4A5_-_74590469.23-P2	GTGGGAGATGTGCAGCCTCA	1.0	1.0	predicted	SLC4A5_+_74590462.23-P2	CATGGCAGAGATCTGCTGAC	2.0	2.0	predicted	SLC4A5_-_74590469.23-P2|SLC4A5_+_74590462.23-P2
ZNF335	P1P2	1-2	significant	ZNF335_+_44600782.23-P1P2	GGTCGATGCCGGAGTCAGAG	1.0	3.0	empirical	ZNF335_+_44600775.23-P1P2	CGTTCCTCTCTGACTCCGGC	2.0	4.0	empirical	ZNF335_+_44600782.23-P1P2|ZNF335_+_44600775.23-P1P2
U2SURP	P1P2	1-2	significant	U2SURP_+_142720444.23-P1P2	GAGCTTTGCCCCTCCTTCGG	1.0	1.0	empirical	U2SURP_+_142720684.23-P1P2	CATAGTCCCAGCCGGGATTC	2.0	6.0	empirical	U2SURP_+_142720444.23-P1P2|U2SURP_+_142720684.23-P1P2
SRSF2	P1P2	1-2	nonessential	SRSF2_+_74733314.23-P1P2	GCGGAAGGCAACTGCCTGAG	1.0	1.0	predicted	SRSF2_+_74733361.23-P1P2	CAGAACAGCACGGACGGGCC	2.0	2.0	predicted	SRSF2_+_74733314.23-P1P2|SRSF2_+_74733361.23-P1P2
POLR2G	P1P2	1-2	essential	POLR2G_-_62529086.23-P1P2	GGATTCCCAGGGACTGTCGG	1.0	2.0	essential	POLR2G_-_62529083.23-P1P2	ACAGTCCCTGGGAATCCACC	2.0	1.0	essential	POLR2G_-_62529086.23-P1P2|POLR2G_-_62529083.23-P1P2
HIST2H2BF	P1P2	1-2	nonessential	HIST2H2BF_-_149783762.23-P1P2	GAGCACCTTGTACACGTAAA	1.0	1.0	predicted	HIST2H2BF_+_149783484.23-P1P2	TTGCACACTCTTACTTCGAC	2.0	2.0	predicted	HIST2H2BF_-_149783762.23-P1P2|HIST2H2BF_+_149783484.23-P1P2
NUP54	P1P2	1-2	essential	NUP54_+_77069544.23-P1P2	GGTCGCAGGAGTAACCTACT	1.0	1.0	essential	NUP54_+_77069376.23-P1P2	CAGGTCGGAGAGTCTCGGAC	2.0	2.0	essential	NUP54_+_77069544.23-P1P2|NUP54_+_77069376.23-P1P2
PTCD1	P2	1-2	significant	PTCD1_-_99036387.23-P2	GGGCGAACCAGTCTCTTCCT	1.0	9.0	empirical	PTCD1_+_99036338.23-P2	ACGGGGAGCCCTGCCCGGTC	2.0	3.0	empirical	PTCD1_-_99036387.23-P2|PTCD1_+_99036338.23-P2
DNLZ	P1P2	1-2	nonessential	DNLZ_+_139257766.23-P1P2	GGGAGGCGGACCATGAGGAG	1.0	1.0	predicted	DNLZ_-_139258138.23-P1P2	AGGTTGCTGAGTCGCGTGCC	2.0	2.0	predicted	DNLZ_+_139257766.23-P1P2|DNLZ_-_139258138.23-P1P2
RPL36AL	P1P2	1-2	nonessential	RPL36AL_+_50087292.23-P1P2	GGCTGCGAAGGGCCAGGTGT	1.0	1.0	predicted	RPL36AL_+_50087262.23-P1P2	CGTTCTTAGCTTACCGAGAC	2.0	2.0	predicted	RPL36AL_+_50087292.23-P1P2|RPL36AL_+_50087262.23-P1P2
ZNF720	P1P2	1-2	nonessential	ZNF720_-_31724619.23-P1P2	GGAGCTCAGTCTCTTCACCA	1.0	1.0	predicted	ZNF720_+_31724629.23-P1P2	TCCATCTGGGAGGCCAAGGC	2.0	2.0	predicted	ZNF720_-_31724619.23-P1P2|ZNF720_+_31724629.23-P1P2
CKAP5	P2	1-2	significant	CKAP5_-_46848384.23-P2	GAGGAATACCCGGCAGGCGG	1.0	1.0	empirical	CKAP5_-_46848381.23-P2	CCTGCCGGGTATTCCTGCTC	2.0	5.0	empirical	CKAP5_-_46848384.23-P2|CKAP5_-_46848381.23-P2
NPEPPS	P1P2	1-2	significant	NPEPPS_+_45608486.23-P1P2	GGGAGGGCCCGCAAGGAGGG	1.0	1.0	empirical	NPEPPS_+_45608493.23-P1P2	TGCGGGCCCTCCTCCCCTTC	2.0	2.0	empirical	NPEPPS_+_45608486.23-P1P2|NPEPPS_+_45608493.23-P1P2
RTCB	P1P2	1-2	essential	RTCB_+_32808194.23-P1P2	GTCTGAGAAGCCGGACTACG	1.0	4.0	essential	RTCB_+_32808188.23-P1P2	CTGCCGCGTAGTCCGGCTTC	2.0	1.0	essential	RTCB_+_32808194.23-P1P2|RTCB_+_32808188.23-P1P2
MED19	P1P2	1-2	essential	MED19_+_57479662.23-P1P2	GAGACACGGAGACAGCGCCG	1.0	4.0	essential	MED19_+_57479647.23-P1P2	TCGTACCCTCCGCCCCGGCC	2.0	1.0	essential	MED19_+_57479662.23-P1P2|MED19_+_57479647.23-P1P2
CFDP1	P2	1-2	significant	CFDP1_-_75448185.23-P2	GTGGTAGCATAGTTCTTCAG	1.0	1.0	predicted	CFDP1_-_75448478.23-P2	GGTGATGCTGCCTTCAAGGC	2.0	2.0	predicted	CFDP1_-_75448185.23-P2|CFDP1_-_75448478.23-P2
SRF	P1P2	1-2	significant	SRF_+_43139367.23-P1P2	GTCGATGCAGGAGGGCGGAC	1.0	5.0	empirical	SRF_-_43139626.23-P1P2	CTGTAGAGGGCCCCCGCGGC	2.0	8.0	empirical	SRF_+_43139367.23-P1P2|SRF_-_43139626.23-P1P2
UBA5	P1P2	1-2	significant	UBA5_-_132379254.23-P1P2	GCGCTGGGTGCACGTCCCCA	1.0	1.0	empirical	UBA5_-_132379610.23-P1P2	CACTTCTGACCTCACGGAGC	2.0	7.0	empirical	UBA5_-_132379254.23-P1P2|UBA5_-_132379610.23-P1P2
RBM39	P1P2	1-2	significant	RBM39_+_34330131.23-P1P2	GAGCAGCGGCCGCCATTTCA	1.0	1.0	empirical	RBM39_+_34330107.23-P1P2	CTGCGACAGCGTCGACAAGC	2.0	4.0	empirical	RBM39_+_34330131.23-P1P2|RBM39_+_34330107.23-P1P2
ZRSR2	P1P2	1-2	significant	ZRSR2_+_15808666.23-P1P2	GGCCTGCTCATCTCCCCGTA	1.0	3.0	empirical	ZRSR2_+_15808801.23-P1P2	TCCCCGGACTTGCACGGGCC	2.0	7.0	empirical	ZRSR2_+_15808666.23-P1P2|ZRSR2_+_15808801.23-P1P2
PMPCB	P2	1-2	essential	PMPCB_-_102940675.23-P2	GGAACTTGAGATTGAAAATA	1.0	3.0	empirical	PMPCB_-_102941127.23-P2	ATTAGCTCTAAAACTGCTAC	2.0	8.0	empirical	PMPCB_-_102940675.23-P2|PMPCB_-_102941127.23-P2
RFT1	P1P2	1-2	significant	RFT1_-_53164286.23-P1P2	GCCCTGGGGCAGGCTCTCAA	1.0	10.0	empirical	RFT1_+_53164411.23-P1P2	ATAGCCTCCGCGCCAGGCTC	2.0	1.0	empirical	RFT1_-_53164286.23-P1P2|RFT1_+_53164411.23-P1P2
BTF3	P1P2	1-2	significant	BTF3_-_72794314.23-P1P2	GCGTGTGTGCGCCTAATCTC	1.0	3.0	empirical	BTF3_+_72794288.23-P1P2	CGCGTGTGTGCGCCTAATCC	2.0	2.0	empirical	BTF3_-_72794314.23-P1P2|BTF3_+_72794288.23-P1P2
USF2	P1P2	1-2	significant	USF2_-_35760358.23-P1P2	GGCCCCTGGCAGCCACGACA	1.0	9.0	empirical	USF2_-_35760370.23-P1P2	CCTCGGGTCCCTTGTCGTGC	2.0	4.0	empirical	USF2_-_35760358.23-P1P2|USF2_-_35760370.23-P1P2
PTPMT1	P1P2	1-2	significant	PTPMT1_+_47587224.23-P1P2	GCAGGGTGTAGAGCAGCGTC	1.0	1.0	empirical	PTPMT1_+_47587437.23-P1P2	CCTCTTTGCCTCGGCAGCTC	2.0	6.0	empirical	PTPMT1_+_47587224.23-P1P2|PTPMT1_+_47587437.23-P1P2
TARS	P1P2	1-2	essential	TARS_+_33441121.23-P1P2	GGAGGAGCCAAGAGGCGGGT	1.0	1.0	essential	TARS_+_33441139.23-P1P2	CTCCTCTAGGCCGTCGCTTC	2.0	2.0	essential	TARS_+_33441121.23-P1P2|TARS_+_33441139.23-P1P2
POP1	P1P2	1-2	significant	POP1_-_99129573.23-P1P2	GGGCTCGGTGGGTACTGTCG	1.0	4.0	empirical	POP1_-_99129576.23-P1P2	CCGCGACAGTACCCACCGAC	2.0	3.0	empirical	POP1_-_99129573.23-P1P2|POP1_-_99129576.23-P1P2
HSP90B1	P1P2	1-2	significant	HSP90B1_+_104324674.23-P1P2	GGGATGGCCGAAGGTTGCGG	1.0	5.0	empirical	HSP90B1_-_104324265.23-P1P2	TCGATCGCAGGAGCCGCCTC	2.0	1.0	empirical	HSP90B1_+_104324674.23-P1P2|HSP90B1_-_104324265.23-P1P2
IMP3	P1P2	1-2	essential	IMP3_+_75932526.23-P1P2	GCTCTCAGCTTCGGGTCCTG	1.0	3.0	essential	IMP3_+_75932082.23-P1P2	CGTCAGGGCCCACGCGTACC	2.0	9.0	essential	IMP3_+_75932526.23-P1P2|IMP3_+_75932082.23-P1P2
ZNF468	P1P2	1-2	nonessential	ZNF468_-_53360493.23-P1P2	GAACCCAGGAGAGTAAGGCT	1.0	1.0	predicted	ZNF468_-_53360496.23-P1P2	CCCAGCCTTACTCTCCTGGC	2.0	2.0	predicted	ZNF468_-_53360493.23-P1P2|ZNF468_-_53360496.23-P1P2
CCT8	P1P2	1-2	essential	CCT8_+_30445740.23-P1P2	GGCGTGCTGCCCTGGCTCAG	1.0	7.0	essential	CCT8_-_30446001.23-P1P2	ACGCTGCTTTCCCAGAAGGC	2.0	1.0	essential	CCT8_+_30445740.23-P1P2|CCT8_-_30446001.23-P1P2
HUS1	P1P2	1-2	significant	HUS1_+_48019118.23-P1P2	GGCCGCGGCTGCGCCATCCG	1.0	9.0	empirical	HUS1_+_48019133.23-P1P2	CGGCGGGCCTCTGTGGGTAC	2.0	1.0	empirical	HUS1_+_48019118.23-P1P2|HUS1_+_48019133.23-P1P2
TUBB	P1	1-2	significant	TUBB_+_30688145.23-P1	GCAGCGAGGTGCAAACGCGA	1.0	3.0	empirical	TUBB_+_30688173.23-P1	CTGGGGCGCATTCCAACCTC	2.0	4.0	empirical	TUBB_+_30688145.23-P1|TUBB_+_30688173.23-P1
PAF1	P1P2	1-2	essential	PAF1_+_39881751.23-P1P2	GCGGCCTGAGGAGACCCGTT	1.0	1.0	essential	PAF1_-_39881702.23-P1P2	CGGTGCTGCCTGCGCGTTCC	2.0	2.0	essential	PAF1_+_39881751.23-P1P2|PAF1_-_39881702.23-P1P2
TOP3A	P1P2	1-2	significant	TOP3A_+_18218267.23-P1P2	GACTGGATTCGGTGCTGAGG	1.0	2.0	empirical	TOP3A_+_18218270.23-P1P2	CAGCACCGAATCCAGTATCC	2.0	4.0	empirical	TOP3A_+_18218267.23-P1P2|TOP3A_+_18218270.23-P1P2
DCLRE1B	P1P2	1-2	nonessential	DCLRE1B_+_114448004.23-P1P2	GCCCGCTGGAGCCCAAATCG	1.0	1.0	predicted	DCLRE1B_+_114448001.23-P1P2	CCGCGATTTGGGCTCCAGCC	2.0	2.0	predicted	DCLRE1B_+_114448004.23-P1P2|DCLRE1B_+_114448001.23-P1P2
ATP6V0B	P1P2	1-2	nonessential	ATP6V0B_+_44440710.23-P1P2	GAGCAGTGCTAGCCCCGTCA	1.0	1.0	predicted	ATP6V0B_-_44440640.23-P1P2	GCAGTCTGTCCGCCCGCCCC	2.0	2.0	predicted	ATP6V0B_+_44440710.23-P1P2|ATP6V0B_-_44440640.23-P1P2
TERF2	P1P2	1-2	significant	TERF2_+_69419852.23-P1P2	GATGGCCGCGGGAGCCGGGA	1.0	3.0	empirical	TERF2_+_69419708.23-P1P2	GCCCGCTGCCGTCGCTACTC	2.0	1.0	empirical	TERF2_+_69419852.23-P1P2|TERF2_+_69419708.23-P1P2
CD2BP2	P1P2	1-2	significant	CD2BP2_-_30366557.23-P1P2	GGAATCCGCGGAAGGCGAGG	1.0	2.0	empirical	CD2BP2_-_30366596.23-P1P2	CGGATGTAGCCCTGGCGCAC	2.0	1.0	empirical	CD2BP2_-_30366557.23-P1P2|CD2BP2_-_30366596.23-P1P2
MYO1H	ENST00000431443.2	1-2	nonessential	MYO1H_-_109826559.23-ENST00000431443.2	GACTGCCCGGGACAAGGTCG	1.0	1.0	predicted	MYO1H_+_109826602.23-ENST00000431443.2	TTGTCGACAACCTCCGCAAC	2.0	2.0	predicted	MYO1H_-_109826559.23-ENST00000431443.2|MYO1H_+_109826602.23-ENST00000431443.2
TIMM44	P1P2	1-2	significant	TIMM44_-_8008522.23-P1P2	GCGGCACCAGCCACTCCGCA	1.0	4.0	empirical	TIMM44_+_8008475.23-P1P2	CACCGCCGCTCACCCGTGGC	2.0	3.0	empirical	TIMM44_-_8008522.23-P1P2|TIMM44_+_8008475.23-P1P2
PPP2CA	P1P2	1-2	significant	PPP2CA_+_133561724.23-P1P2	GGAGCCTCAGCGAGCGGAGG	1.0	1.0	empirical	PPP2CA_+_133561727.23-P1P2	CCGCTCGCTGAGGCTCCAGC	2.0	2.0	empirical	PPP2CA_+_133561724.23-P1P2|PPP2CA_+_133561727.23-P1P2
RUVBL2	P1P2	1-2	significant	RUVBL2_-_49497190.23-P1P2	GTGGCAACCGTTGTAAGTGT	1.0	4.0	empirical	RUVBL2_-_49497171.23-P1P2	TGATGCTCACCAACTGCCAC	2.0	2.0	empirical	RUVBL2_-_49497190.23-P1P2|RUVBL2_-_49497171.23-P1P2
UBE2D3	P1P2	1-2	significant	UBE2D3_-_103748127.23-P1P2	GCGCTATACCGGCGTCACTA	1.0	1.0	empirical	UBE2D3_+_103748297.23-P1P2	TACACTCACTCCGCCTTCCC	2.0	8.0	empirical	UBE2D3_-_103748127.23-P1P2|UBE2D3_+_103748297.23-P1P2
CRNKL1	P1P2	1-2	essential	CRNKL1_+_20033001.23-P1P2	GGCCGGGGACAGGTGTCCAG	1.0	3.0	essential	CRNKL1_-_20033040.23-P1P2	ATTTCTAGCGTCCGTGCCGC	2.0	1.0	essential	CRNKL1_+_20033001.23-P1P2|CRNKL1_-_20033040.23-P1P2
DDX3X	P1P2	1-2	significant	DDX3X_+_41193418.23-P1P2	GCCCTCTCACGGGAGAACTG	1.0	2.0	empirical	DDX3X_+_41193428.23-P1P2	GTGAGAGGGCCTTCGCGGTC	2.0	4.0	empirical	DDX3X_+_41193418.23-P1P2|DDX3X_+_41193428.23-P1P2
DHX16	P1P2	1-2	essential	DHX16_+_30640731.23-P1P2	GGAAGATCCTAGAGGTCCCA	1.0	1.0	essential	DHX16_-_30640796.23-P1P2	TTCCGGGCTCCGCGGTACGC	2.0	3.0	essential	DHX16_+_30640731.23-P1P2|DHX16_-_30640796.23-P1P2
PPP2R1A	P1	1-2	significant	PPP2R1A_-_52693331.23-P1	GGCGCTGGCCGCAGTCTGAC	1.0	3.0	empirical	PPP2R1A_-_52693691.23-P1	CCCAGGACCGCGGACCGCCC	2.0	8.0	empirical	PPP2R1A_-_52693331.23-P1|PPP2R1A_-_52693691.23-P1
EGLN2	P1	1-2	nonessential	EGLN2_-_41305141.23-P1	GGGGCGGCTGGCACAAACGG	1.0	1.0	predicted	EGLN2_-_41305138.23-P1	TTTGTGCCAGCCGCCCTGCC	2.0	2.0	predicted	EGLN2_-_41305141.23-P1|EGLN2_-_41305138.23-P1
PMF1-BGLAP	P1P2	1-2	essential	PMF1-BGLAP_+_156183115.23-P1P2	GGTGAATACCCTGACTCCTA	1.0	6.0	essential	PMF1-BGLAP_-_156182834.23-P1P2	AGATTGGCGCTACTTGCTTC	2.0	1.0	essential	PMF1-BGLAP_+_156183115.23-P1P2|PMF1-BGLAP_-_156182834.23-P1P2
LRR1	P1P2	1-2	significant	LRR1_+_50065858.23-P1P2	GGCAGGAAGGCTCGGACCGG	1.0	6.0	empirical	LRR1_-_50065670.23-P1P2	TCGGGGTCCTCGCGCACGCC	2.0	2.0	empirical	LRR1_+_50065858.23-P1P2|LRR1_-_50065670.23-P1P2
PDCD7	P1P2	1-2	significant	PDCD7_-_65425740.23-P1P2	GCGAGCACGTCGGCCGGCGG	1.0	5.0	empirical	PDCD7_-_65426129.23-P1P2	TCGTGAACATGGCCCTGCCC	2.0	2.0	empirical	PDCD7_-_65425740.23-P1P2|PDCD7_-_65426129.23-P1P2
MCRS1	P1P2	1-2	nonessential	MCRS1_+_49961900.23-P1P2	GCGGAAGTAGACGTACCTCA	1.0	1.0	predicted	MCRS1_+_49961849.23-P1P2	ACAATTTCTCCGCGGCGACC	2.0	2.0	predicted	MCRS1_+_49961900.23-P1P2|MCRS1_+_49961849.23-P1P2
PGD	P1P2	1-2	significant	PGD_+_10459120.23-P1P2	GACGCGCGGAGGACGAGTGA	1.0	2.0	empirical	PGD_+_10459169.23-P1P2	CCATGGCCCAGTGAGTGACC	2.0	1.0	empirical	PGD_+_10459120.23-P1P2|PGD_+_10459169.23-P1P2
VPS54	P1P2	1-2	essential	VPS54_+_64246129.23-P1P2	GAGCCTCGGTGCGACGTGGA	1.0	1.0	essential	VPS54_+_64246255.23-P1P2	TCTCGAGCCCAGCTTCACTC	2.0	9.0	essential	VPS54_+_64246129.23-P1P2|VPS54_+_64246255.23-P1P2
NOL9	P1P2	1-2	significant	NOL9_-_6614523.23-P1P2	GGACCCGCAGCCAAGTGGAA	1.0	1.0	empirical	NOL9_+_6614393.23-P1P2	GGGCTTGCAGTAACCGCCAC	2.0	2.0	empirical	NOL9_-_6614523.23-P1P2|NOL9_+_6614393.23-P1P2
LCN10	P1P2	1-2	nonessential	LCN10_-_139636440.23-P1P2	GAAGAATCCCTGGGCATCAG	1.0	1.0	predicted	LCN10_+_139636425.23-P1P2	TGGGCATCAGTGGCAGTGGC	2.0	2.0	predicted	LCN10_-_139636440.23-P1P2|LCN10_+_139636425.23-P1P2
VPS41	P2	1-2	significant	VPS41_+_38969081.23-P2	GTCTGTAGCTCCATAATCAA	1.0	1.0	predicted	VPS41_-_38969076.23-P2	AGGGTGAGTATGGGGCCTCC	2.0	2.0	predicted	VPS41_+_38969081.23-P2|VPS41_-_38969076.23-P2
PPP6C	P1P2	1-2	significant	PPP6C_-_127952026.23-P1P2	GTAACAAGCCGCGGCAACAG	1.0	1.0	empirical	PPP6C_+_127951685.23-P1P2	TGGGACAGAGGCCGCGACAC	2.0	8.0	empirical	PPP6C_-_127952026.23-P1P2|PPP6C_+_127951685.23-P1P2
MRPS35	P1P2	1-2	essential	MRPS35_+_27863749.23-P1P2	GCGAGGACGGCAAGCCGGAG	1.0	5.0	essential	MRPS35_-_27863821.23-P1P2	TCGACTGCAGAGACAGCCAC	2.0	3.0	essential	MRPS35_+_27863749.23-P1P2|MRPS35_-_27863821.23-P1P2
MTOR	P1P2	1-2	essential	MTOR_+_11322547.23-P1P2	GGGCAGGGGGCCTGAAGCGG	1.0	7.0	essential	MTOR_+_11322541.23-P1P2	GTACCGCCGCTTCAGGCCCC	2.0	6.0	essential	MTOR_+_11322547.23-P1P2|MTOR_+_11322541.23-P1P2
SF3B3	P1P2	1-2	significant	SF3B3_-_70557770.23-P1P2	GAGTATGTTGGAGTTGGTGG	1.0	3.0	empirical	SF3B3_-_70558137.23-P1P2	AGAGGGAGACATCCATGCCC	2.0	8.0	empirical	SF3B3_-_70557770.23-P1P2|SF3B3_-_70558137.23-P1P2
CIAO1	P1P2	1-2	nonessential	CIAO1_-_96932005.23-P1P2	GGGCCGCGGAAGCCTGGAGT	1.0	1.0	predicted	CIAO1_+_96932066.23-P1P2	CCCCCTGCGTCGGGCCGACC	2.0	2.0	predicted	CIAO1_-_96932005.23-P1P2|CIAO1_+_96932066.23-P1P2
WDR82	P1P2	1-2	significant	WDR82_-_52312175.23-P1P2	GCCTGTGCTGGGCCACCGGA	1.0	4.0	empirical	WDR82_+_52312203.23-P1P2	CCGCACTCACTTGCCCTCCC	2.0	5.0	empirical	WDR82_-_52312175.23-P1P2|WDR82_+_52312203.23-P1P2
ZNF284	ENST00000421176.3	1-2	nonessential	ZNF284_+_44576342.23-ENST00000421176.3	GAGAAGGACCGACAAGACAC	1.0	1.0	predicted	ZNF284_-_44576326.23-ENST00000421176.3	CCGAATGCACTGCAGCAACC	2.0	2.0	predicted	ZNF284_+_44576342.23-ENST00000421176.3|ZNF284_-_44576326.23-ENST00000421176.3
EIF3L	P1P2	1-2	significant	EIF3L_+_38245454.23-P1P2	GTCATCAGCGGGATAAGACA	1.0	1.0	empirical	EIF3L_-_38245450.23-P1P2	CGCTTGCGAGCACCGCCGGC	2.0	6.0	empirical	EIF3L_+_38245454.23-P1P2|EIF3L_-_38245450.23-P1P2
WTAP	P1P2	1-2	nonessential	WTAP_-_160148592.23-P1P2	GCAAATAAAGGGGAGCGCAG	1.0	1.0	predicted	WTAP_-_160148580.23-P1P2	TTATTTGTGGGTCTCGCTGC	2.0	2.0	predicted	WTAP_-_160148592.23-P1P2|WTAP_-_160148580.23-P1P2
RPS8	P1P2	1-2	significant	RPS8_+_45241261.23-P1P2	GGCGACACTCACCCATCGCT	1.0	6.0	empirical	RPS8_-_45241305.23-P1P2	TTCACCCGCCTCAATGCAGC	2.0	3.0	empirical	RPS8_+_45241261.23-P1P2|RPS8_-_45241305.23-P1P2
SNIP1	P1P2	1-2	significant	SNIP1_+_38019681.23-P1P2	GACCGCCGTCCGGACCACTC	1.0	6.0	empirical	SNIP1_+_38019797.23-P1P2	TCGCTCCCGTTCGCTCTTCC	2.0	4.0	empirical	SNIP1_+_38019681.23-P1P2|SNIP1_+_38019797.23-P1P2
TLN1	P1P2	1-2	significant	TLN1_+_35732116.23-P1P2	GCCGAGGGCGACCCGAGAAG	1.0	1.0	empirical	TLN1_+_35732111.23-P1P2	CGCCGCTTCTCGGGTCGCCC	2.0	5.0	empirical	TLN1_+_35732116.23-P1P2|TLN1_+_35732111.23-P1P2
DDX41	P1P2	1-2	essential	DDX41_+_176943914.23-P1P2	GCGGAACCCGAACGGAAGGT	1.0	1.0	essential	DDX41_+_176943922.23-P1P2	TTCGGGTTCCGACTCCTCCC	2.0	2.0	essential	DDX41_+_176943914.23-P1P2|DDX41_+_176943922.23-P1P2
MED14	P1P2	1-2	essential	MED14_+_40594762.23-P1P2	GGCGGCCCGGCGGTAGGCGG	1.0	5.0	essential	MED14_+_40594765.23-P1P2	CCTACCGCCGGGCCGCCTCC	2.0	10.0	essential	MED14_+_40594762.23-P1P2|MED14_+_40594765.23-P1P2
INTS8	P1P2	1-2	essential	INTS8_+_95835564.23-P1P2	GGGGGTATGCGGAACCCGGT	1.0	5.0	essential	INTS8_+_95835490.23-P1P2	CAGCTCCGGCTGGCCCGCGC	2.0	1.0	essential	INTS8_+_95835564.23-P1P2|INTS8_+_95835490.23-P1P2
BRIP1	P1P2	1-2	significant	BRIP1_-_59940486.23-P1P2	GACAGGCCTGCGCTCAAAGG	1.0	9.0	empirical	BRIP1_+_59940833.23-P1P2	TTCCTCGACCCACCAGACCC	2.0	3.0	empirical	BRIP1_-_59940486.23-P1P2|BRIP1_+_59940833.23-P1P2
CTBP2	P1P2	1-2	nonessential	CTBP2_-_126849603.23-P1P2	GTAGGCGGGAGGCGAGGTGA	1.0	1.0	predicted	CTBP2_+_126849547.23-P1P2	CAGCTCCCGGTACCCGCTGC	2.0	2.0	predicted	CTBP2_-_126849603.23-P1P2|CTBP2_+_126849547.23-P1P2
YJEFN3	P1	1-2	significant	YJEFN3_-_19627479.23-P1	GAGAAGGCCGCGGCTCCCCA	1.0	5.0	empirical	YJEFN3_+_19627083.23-P1	GGGGGCTATGGGCCCATCGC	2.0	3.0	empirical	YJEFN3_-_19627479.23-P1|YJEFN3_+_19627083.23-P1
WBP1	P1P2	1-2	nonessential	WBP1_-_74685599.23-P1P2	GTCTGCCCGGATGGAAGCTC	1.0	1.0	predicted	WBP1_-_74685547.23-P1P2	TACCAATCATCATCGTCCCC	2.0	2.0	predicted	WBP1_-_74685599.23-P1P2|WBP1_-_74685547.23-P1P2
PPP1CA	P2	1-2	significant	PPP1CA_-_67188610.23-P2	GCGGCGCGCTGCCTCATGGA	1.0	1.0	predicted	PPP1CA_-_67188663.23-P2	ACACGAACTTCTTGCTGACC	2.0	2.0	predicted	PPP1CA_-_67188610.23-P2|PPP1CA_-_67188663.23-P2
ATP6V1E1	P1P2	1-2	significant	ATP6V1E1_+_18111483.23-P1P2	GGGAACCCGAGATCTGCGCA	1.0	1.0	empirical	ATP6V1E1_-_18111500.23-P1P2	GAGATCTGCGCAGGGGTTCC	2.0	3.0	empirical	ATP6V1E1_+_18111483.23-P1P2|ATP6V1E1_-_18111500.23-P1P2
KCTD10	P1P2	1-2	essential	KCTD10_-_109915112.23-P1P2	GTCCAAACCCGGACTGAGAG	1.0	1.0	essential	KCTD10_+_109915092.23-P1P2	AACCCGGACTGAGAGAGGCC	2.0	5.0	essential	KCTD10_-_109915112.23-P1P2|KCTD10_+_109915092.23-P1P2
CHCHD2	P1P2	1-2	nonessential	CHCHD2_-_56174016.23-P1P2	GTCATTGCCCCAGTAGAGTC	1.0	1.0	predicted	CHCHD2_+_56174001.23-P1P2	CAGTAGAGTCCGGACGGCCC	2.0	2.0	predicted	CHCHD2_-_56174016.23-P1P2|CHCHD2_+_56174001.23-P1P2
UQCRC2	P1P2	1-2	significant	UQCRC2_+_21964884.23-P1P2	GCCCGCAGGGTTCAGCTGAA	1.0	1.0	empirical	UQCRC2_+_21964701.23-P1P2	TTAATCCGGCAGTGACCGTC	2.0	5.0	empirical	UQCRC2_+_21964884.23-P1P2|UQCRC2_+_21964701.23-P1P2
SMN2	ENST00000380743.4	1-2	essential	SMN2_-_69345531.23-ENST00000380743.4	GCTATGGCGATGAGCAGCGG	1.0	1.0	essential	SMN2_+_69345485.23-ENST00000380743.4	ACGCTGCGCACCCGCGGGTC	2.0	5.0	essential	SMN2_-_69345531.23-ENST00000380743.4|SMN2_+_69345485.23-ENST00000380743.4
RPL23A	P1P2	1-2	essential	RPL23A_-_27047048.23-P1P2	GCGCCGAAAGCGAAGAAGGA	1.0	1.0	essential	RPL23A_+_27047315.23-P1P2	CTGGTTGGAGCTCCATGTCC	2.0	5.0	essential	RPL23A_-_27047048.23-P1P2|RPL23A_+_27047315.23-P1P2
SLC39A9	P1P2	1-2	essential	SLC39A9_+_69865454.23-P1P2	GACTCGACCGGGCCTTGACC	1.0	4.0	essential	SLC39A9_-_69865448.23-P1P2	ATACTACAGCTGCCATGGCC	2.0	1.0	essential	SLC39A9_+_69865454.23-P1P2|SLC39A9_-_69865448.23-P1P2
GLI4	P1P2	1-2	nonessential	GLI4_-_144349662.23-P1P2	GTCCCGCTCGGAAGGTGAGT	1.0	1.0	predicted	GLI4_+_144349643.23-P1P2	CTCGGAAGGTGAGTGGGCGC	2.0	2.0	predicted	GLI4_-_144349662.23-P1P2|GLI4_+_144349643.23-P1P2
MRPL22	P1P2	1-2	essential	MRPL22_-_154320698.23-P1P2	GCGGCAGTACTGGGACAGTT	1.0	1.0	essential	MRPL22_-_154320703.23-P1P2	TACCCAACTGTCCCAGTACC	2.0	7.0	essential	MRPL22_-_154320698.23-P1P2|MRPL22_-_154320703.23-P1P2
CXXC1	P1P2	1-2	significant	CXXC1_-_47814029.23-P1P2	GACCTGCACAGACCACTCGG	1.0	3.0	empirical	CXXC1_-_47814050.23-P1P2	TTGCAACCGCCTGGGACGCC	2.0	10.0	empirical	CXXC1_-_47814029.23-P1P2|CXXC1_-_47814050.23-P1P2
SNRNP200	P1P2	1-2	essential	SNRNP200_+_96971234.23-P1P2	GCGGCGGGAGCAGAGATCTG	1.0	3.0	essential	SNRNP200_-_96971287.23-P1P2	CAGTGCGTCTTTCCTGCGTC	2.0	2.0	essential	SNRNP200_+_96971234.23-P1P2|SNRNP200_-_96971287.23-P1P2
ELP3	P1P2	1-2	significant	ELP3_-_27950720.23-P1P2	GATCTCTGGTGGCTCTGCTA	1.0	2.0	empirical	ELP3_-_27950736.23-P1P2	CATTTCTGCGCCGCCGTAGC	2.0	1.0	empirical	ELP3_-_27950720.23-P1P2|ELP3_-_27950736.23-P1P2
CEP192	P1P2	1-2	essential	CEP192_+_12991384.23-P1P2	GTGTGCAGCGGGAAAGTCCA	1.0	3.0	essential	CEP192_+_12991736.23-P1P2	CTCTTGTCTGGGGACTTCCC	2.0	8.0	essential	CEP192_+_12991384.23-P1P2|CEP192_+_12991736.23-P1P2
SPTSSA	P1P2	1-2	significant	SPTSSA_+_34931416.23-P1P2	GGTGTGAGCTGCATCGCGGG	1.0	2.0	empirical	SPTSSA_+_34931459.23-P1P2	GCTCACGTCCTAAAGCCCCC	2.0	1.0	empirical	SPTSSA_+_34931416.23-P1P2|SPTSSA_+_34931459.23-P1P2
MFAP1	P1P2	1-2	essential	MFAP1_+_44116853.23-P1P2	GCTGTGTTCGCGGACTCAGG	1.0	3.0	essential	MFAP1_-_44116904.23-P1P2	TAAGTAGTTTCTCTATCAGC	2.0	1.0	essential	MFAP1_+_44116853.23-P1P2|MFAP1_-_44116904.23-P1P2
GOSR2	P1P2	1-2	significant	GOSR2_-_45000519.23-P1P2	GGCTGTGAGGACGTGTTCCG	1.0	2.0	empirical	GOSR2_-_45000934.23-P1P2	CTCGAGGTCTACCAACCAGC	2.0	4.0	empirical	GOSR2_-_45000519.23-P1P2|GOSR2_-_45000934.23-P1P2
TRAPPC11	P1P2	1-2	significant	TRAPPC11_+_184580504.23-P1P2	GGGGATGTCACAGAACGCCG	1.0	1.0	empirical	TRAPPC11_-_184580498.23-P1P2	CACCGCCGCAGCCCCACAGC	2.0	7.0	empirical	TRAPPC11_+_184580504.23-P1P2|TRAPPC11_-_184580498.23-P1P2
UROD	P1P2	1-2	significant	UROD_-_45477940.23-P1P2	GAGTTACAGACAGCTGACCA	1.0	1.0	empirical	UROD_-_45477955.23-P1P2	ACCCATTCGCTTCCATGGTC	2.0	3.0	empirical	UROD_-_45477940.23-P1P2|UROD_-_45477955.23-P1P2
MRPL36	P1P2	1-2	essential	MRPL36_+_1799909.23-P1P2	GGGCGCCGGGTGAGAGCGTG	1.0	6.0	essential	MRPL36_+_1799899.23-P1P2	TACCCGGCCGCACGCTCTCC	2.0	2.0	essential	MRPL36_+_1799909.23-P1P2|MRPL36_+_1799899.23-P1P2
DCTN3	P1P2	1-2	essential	DCTN3_+_34620457.23-P1P2	GGGTGGGTCGGTAGTAGCGA	1.0	3.0	essential	DCTN3_+_34620473.23-P1P2	ACCTCGGCCAGGAAACAGCC	2.0	6.0	essential	DCTN3_+_34620457.23-P1P2|DCTN3_+_34620473.23-P1P2
NBPF3	P1P2	1-2	nonessential	NBPF3_-_21766682.23-P1P2	GCGGCGGTACTGGGATGGGT	1.0	1.0	predicted	NBPF3_-_21766678.23-P1P2	ATCCCAGTACCGCCGCTGTC	2.0	2.0	predicted	NBPF3_-_21766682.23-P1P2|NBPF3_-_21766678.23-P1P2
AFG3L2	P1P2	1-2	essential	AFG3L2_-_12377212.23-P1P2	GGCGCGCCGGCGGCTCACGG	1.0	2.0	essential	AFG3L2_-_12377232.23-P1P2	CGTTGAGAGCTTGGGCTCCC	2.0	1.0	essential	AFG3L2_-_12377212.23-P1P2|AFG3L2_-_12377232.23-P1P2
PPY	P1P2	1-2	nonessential	PPY_-_42019846.23-P1P2	GCACCTGCCTCAGGCCGGAT	1.0	1.0	predicted	PPY_+_42019795.23-P1P2	GAGTAAATGGGCACTAGACC	2.0	2.0	predicted	PPY_-_42019846.23-P1P2|PPY_+_42019795.23-P1P2
POLR1A	P1P2	1-2	essential	POLR1A_+_86332623.23-P1P2	GAAGAGGCCGGTGGTGCTGG	1.0	9.0	essential	POLR1A_+_86332775.23-P1P2	ACCTCAAGATCCAGGCTGGC	2.0	7.0	essential	POLR1A_+_86332623.23-P1P2|POLR1A_+_86332775.23-P1P2
EIF2B4	P1P2	1-2	essential	EIF2B4_+_27593168.23-P1P2	GCTGAGGGCGATGGCTGCTG	1.0	3.0	essential	EIF2B4_+_27593203.23-P1P2	CCGTGGTCACGGAGCCGCCC	2.0	2.0	essential	EIF2B4_+_27593168.23-P1P2|EIF2B4_+_27593203.23-P1P2
PSMA6	P1P2	1-2	significant	PSMA6_+_35761833.23-P1P2	GTCGGCCCCAGACTAAACCC	1.0	5.0	empirical	PSMA6_-_35761832.23-P1P2	CGTCTGCTCGCTCCAGGCAC	2.0	1.0	empirical	PSMA6_+_35761833.23-P1P2|PSMA6_-_35761832.23-P1P2
SMG6	P1P2	1-2	nonessential	SMG6_-_2206815.23-P1P2	GGGCCCCAGCGCCTACTGCT	1.0	1.0	predicted	SMG6_+_2206838.23-P1P2	AGGGCCGAGCGGGGAGGAGC	2.0	2.0	predicted	SMG6_-_2206815.23-P1P2|SMG6_+_2206838.23-P1P2
TSPYL5	P1P2	1-2	nonessential	TSPYL5_-_98290076.23-P1P2	GCGACTTCGGCCGCTCATGG	1.0	1.0	predicted	TSPYL5_-_98290161.23-P1P2	TGGAGAGACCCGCTCGGTCC	2.0	2.0	predicted	TSPYL5_-_98290076.23-P1P2|TSPYL5_-_98290161.23-P1P2
EWSR1	P1P2	1-2	significant	EWSR1_+_29664332.23-P1P2	GGTTCCACCATACTCACCCG	1.0	2.0	empirical	EWSR1_-_29664350.23-P1P2	CCATACTCACCCGTGGACGC	2.0	1.0	empirical	EWSR1_+_29664332.23-P1P2|EWSR1_-_29664350.23-P1P2
PCBP2	P1	1-2	significant	PCBP2_+_53846112.23-P1	GAAAGGGGAGCGGGCGGGAA	1.0	1.0	empirical	PCBP2_+_53846301.23-P1	GTCATTCACGCGAGGCCCTC	2.0	8.0	empirical	PCBP2_+_53846112.23-P1|PCBP2_+_53846301.23-P1
RTTN	P1P2	1-2	significant	RTTN_+_67872884.23-P1P2	GTGACGGGACGAGATGGTCC	1.0	2.0	empirical	RTTN_+_67872899.23-P1P2	GTCAATCTGCAGCCGCCGGC	2.0	3.0	empirical	RTTN_+_67872884.23-P1P2|RTTN_+_67872899.23-P1P2
SAE1	P1P2	1-2	essential	SAE1_-_47634169.23-P1P2	GTTGAGCGGGACCGGAGCTG	1.0	2.0	essential	SAE1_-_47634161.23-P1P2	GTCCCGCTCAAGCCAACCGC	2.0	1.0	essential	SAE1_-_47634169.23-P1P2|SAE1_-_47634161.23-P1P2
POLR2K	P1P2	1-2	significant	POLR2K_-_101162904.23-P1P2	GGGACTAGCCGGGTTGTATT	1.0	9.0	empirical	POLR2K_-_101162912.23-P1P2	CGTTTCCAAATACAACCCGC	2.0	1.0	empirical	POLR2K_-_101162904.23-P1P2|POLR2K_-_101162912.23-P1P2
EXOSC5	P1P2	1-2	essential	EXOSC5_+_41903223.23-P1P2	GGGGCTCGGCGCGATGGAGG	1.0	1.0	essential	EXOSC5_-_41903252.23-P1P2	CACGTGGGCTCGGCGCGATC	2.0	3.0	essential	EXOSC5_+_41903223.23-P1P2|EXOSC5_-_41903252.23-P1P2
RNF103	P1P2	1-2	nonessential	RNF103_+_86850947.23-P1P2	GCGCGGCCGCCGCTGATACA	1.0	1.0	predicted	RNF103_+_86850932.23-P1P2	TACCCTCCACAACCGTGTAC	2.0	2.0	predicted	RNF103_+_86850947.23-P1P2|RNF103_+_86850932.23-P1P2
KIF23	P1P2	1-2	essential	KIF23_+_69706676.23-P1P2	GCGGTGCTCTGCGAAGCCGG	1.0	5.0	essential	KIF23_+_69707149.23-P1P2	TTCTCCCTCGCTGGCTGCCC	2.0	5.0	essential	KIF23_+_69706676.23-P1P2|KIF23_+_69707149.23-P1P2
CRKL	P1P2	1-2	significant	CRKL_-_21271784.23-P1P2	GTGGCTATTGGGAACAAGCT	1.0	5.0	empirical	CRKL_-_21271801.23-P1P2	CCGGGGTGCTTTTGCCCAGC	2.0	1.0	empirical	CRKL_-_21271784.23-P1P2|CRKL_-_21271801.23-P1P2
STARD7	P1P2	1-2	significant	STARD7_-_96874031.23-P1P2	GGCGTGAGCTCTCGGAGTAG	1.0	10.0	empirical	STARD7_+_96874548.23-P1P2	TCCGCGACTGCCACACGCGC	2.0	9.0	empirical	STARD7_-_96874031.23-P1P2|STARD7_+_96874548.23-P1P2
MRPL41	P1P2	1-2	essential	MRPL41_-_140446382.23-P1P2	GAGCAAGGTCGAGGCCGGGT	1.0	1.0	essential	MRPL41_-_140446416.23-P1P2	ACACGAGCTCCAAGCGGCCC	2.0	2.0	essential	MRPL41_-_140446382.23-P1P2|MRPL41_-_140446416.23-P1P2
RPL11	P1P2	1-2	essential	RPL11_+_24018674.23-P1P2	GGGCTGGCACCTTCCCTAAG	1.0	10.0	essential	RPL11_+_24018347.23-P1P2	TTATCCGTCGCCATCCATGC	2.0	1.0	essential	RPL11_+_24018674.23-P1P2|RPL11_+_24018347.23-P1P2
SNW1	P1	1-2	essential	SNW1_+_78227421.23-P1	GTGGGGTCCTCGATACGGAA	1.0	5.0	essential	SNW1_+_78227503.23-P1	CTGGGCGGGTCTTTCCAGAC	2.0	9.0	essential	SNW1_+_78227421.23-P1|SNW1_+_78227503.23-P1
MIS18A	P1P2	1-2	essential	MIS18A_+_33651327.23-P1P2	GTGGGGCGCGGGCGATTTGT	1.0	7.0	essential	MIS18A_+_33651321.23-P1P2	TTACCTACAAATCGCCCGCC	2.0	5.0	essential	MIS18A_+_33651327.23-P1P2|MIS18A_+_33651321.23-P1P2
KANSL2	P1P2	1-2	essential	KANSL2_+_49075987.23-P1P2	GCGAGCGGCGCGGCAGAGTG	1.0	1.0	essential	KANSL2_+_49076002.23-P1P2	CTCGCCCTTCTCTAGTGGCC	2.0	2.0	essential	KANSL2_+_49075987.23-P1P2|KANSL2_+_49076002.23-P1P2
KRT8	P1	1-2	nonessential	KRT8_-_53298844.23-P1	GGAGAAGCTGCTTCTTGGTG	1.0	1.0	predicted	KRT8_-_53298430.23-P1	CTGCGTGGCTGACTGTGCCC	2.0	2.0	predicted	KRT8_-_53298844.23-P1|KRT8_-_53298430.23-P1
ZWINT	P1P2	1-2	significant	ZWINT_+_58120993.23-P1P2	GAACTCGGCGCCTGGAAAGA	1.0	3.0	empirical	ZWINT_-_58120962.23-P1P2	TAGAGTAAGTGTTTGCGGCC	2.0	2.0	empirical	ZWINT_+_58120993.23-P1P2|ZWINT_-_58120962.23-P1P2
RPA3	P1P2	1-2	essential	RPA3_-_7680087.23-P1P2	GGCGGCTGGCGGGAAACCCA	1.0	3.0	essential	RPA3_-_7679719.23-P1P2	GTCGCCTCCGTTCTAGCCGC	2.0	6.0	essential	RPA3_-_7680087.23-P1P2|RPA3_-_7679719.23-P1P2
UBA1	P2	1-2	essential	UBA1_+_47050450.23-P2	GAATATCACCCCGGGCCCGG	1.0	7.0	essential	UBA1_-_47050478.23-P2	CCTAAATATCACCCCGGGCC	2.0	2.0	essential	UBA1_+_47050450.23-P2|UBA1_-_47050478.23-P2
RPL7A	P1P2	1-2	essential	RPL7A_-_136215123.23-P1P2	GTGAGTGAGCTGTAGTTCCG	1.0	1.0	essential	RPL7A_+_136215092.23-P1P2	AAGATGGTGAGTGAGCTGTC	2.0	3.0	essential	RPL7A_-_136215123.23-P1P2|RPL7A_+_136215092.23-P1P2
SARS	P1P2	1-2	essential	SARS_+_109756585.23-P1P2	GCCTCCCGGGCCAACGCTCA	1.0	3.0	essential	SARS_-_109756603.23-P1P2	GGGCCAACGCTCAGGGAAGC	2.0	5.0	essential	SARS_+_109756585.23-P1P2|SARS_-_109756603.23-P1P2
RPL17	P1P2	1-2	essential	RPL17_-_47018832.23-P1P2	GCAGGAGAAACACTCACCTC	1.0	6.0	essential	RPL17_-_47018796.23-P1P2	AATCCTCCTGCCATCGCCGC	2.0	3.0	essential	RPL17_-_47018832.23-P1P2|RPL17_-_47018796.23-P1P2
EIF3CL	ENST00000380876.4,ENST00000398943.3,ENST00000398944.3	1-2	essential	EIF3CL_+_28415115.23-ENST00000380876.4,ENST00000398943.3,ENST00000398944.3	GGCCCTGCGGTGTGACTCGC	1.0	1.0	essential	EIF3CL_-_28415135.23-ENST00000380876.4,ENST00000398943.3,ENST00000398944.3	TGCGGTGTGACTCGCGGGCC	2.0	6.0	essential	EIF3CL_+_28415115.23-ENST00000380876.4,ENST00000398943.3,ENST00000398944.3|EIF3CL_-_28415135.23-ENST00000380876.4,ENST00000398943.3,ENST00000398944.3
GCOM1	P1P2	1-2	nonessential	GCOM1_+_57884092.23-P1P2	GCTGCACCGCGAAGGCCCGG	1.0	1.0	predicted	GCOM1_+_57884167.23-P1P2	GCACGCTTATTCTGCCCGGC	2.0	2.0	predicted	GCOM1_+_57884092.23-P1P2|GCOM1_+_57884167.23-P1P2
GTF2H1	P1P2	1-2	significant	GTF2H1_-_18344160.23-P1P2	GCGAGACCCCCTAGTAACAG	1.0	1.0	empirical	GTF2H1_+_18344179.23-P1P2	CTGGGTTTCGGCCTCTTCCC	2.0	4.0	empirical	GTF2H1_-_18344160.23-P1P2|GTF2H1_+_18344179.23-P1P2
KIF11	P1P2	1-2	essential	KIF11_-_94352958.23-P1P2	GTGGCGCGGGACAAACGCCA	1.0	5.0	essential	KIF11_-_94352939.23-P1P2	GTCGGAGCCGCCAAATCACC	2.0	8.0	essential	KIF11_-_94352958.23-P1P2|KIF11_-_94352939.23-P1P2
EIF4E	P1P2	1-2	essential	EIF4E_-_99850247.23-P1P2	GGGCCAAAGGCAATACTCAC	1.0	1.0	essential	EIF4E_+_99849828.23-P1P2	CCATCTCACTCCAGGCCGGC	2.0	5.0	essential	EIF4E_-_99850247.23-P1P2|EIF4E_+_99849828.23-P1P2
HMGCR	P1P2	1-2	significant	HMGCR_+_74633092.23-P1P2	GACTAGAGGCCACCGAACCC	1.0	3.0	empirical	HMGCR_+_74633106.23-P1P2	CTAGTGAGATCTGGAGGTGC	2.0	3.0	empirical	HMGCR_+_74633092.23-P1P2|HMGCR_+_74633106.23-P1P2
MED30	P1P2	1-2	essential	MED30_+_118533216.23-P1P2	GCACTGTCTCCTGCCCGATG	1.0	8.0	essential	MED30_-_118533205.23-P1P2	TGTTGACTTCCCGGGCGGCC	2.0	5.0	essential	MED30_+_118533216.23-P1P2|MED30_-_118533205.23-P1P2
NBPF12	P1P2	1-2	significant	NBPF12_+_146373532.23-P1P2	GGACTTCCGGGCTCCGCCCG	1.0	3.0	empirical	NBPF12_-_146373567.23-P1P2	CCCCATAGTCTGACTTCCGC	2.0	6.0	empirical	NBPF12_+_146373532.23-P1P2|NBPF12_-_146373567.23-P1P2
LTB4R2	P1P2	1-2	nonessential	LTB4R2_-_24779567.23-P1P2	GGGCCAGACTAGAGGAGTGG	1.0	1.0	predicted	LTB4R2_+_24779396.23-P1P2	CGCCTACTGCTGCTTAACCC	2.0	2.0	predicted	LTB4R2_-_24779567.23-P1P2|LTB4R2_+_24779396.23-P1P2
NELFA	P1P2	1-2	significant	NELFA_+_2010657.23-P1P2	GCCATGCGGGAGAGCGACAC	1.0	1.0	empirical	NELFA_+_2010470.23-P1P2	TACCTCGTCCACCGTGCGGC	2.0	4.0	empirical	NELFA_+_2010657.23-P1P2|NELFA_+_2010470.23-P1P2
PSME1	P1P2	1-2	nonessential	PSME1_+_24605428.23-P1P2	GGCCGCACAAGGAGTGGAGT	1.0	1.0	predicted	PSME1_+_24605434.23-P1P2	CTCCTTGTGCGGCGCTAGGC	2.0	2.0	predicted	PSME1_+_24605428.23-P1P2|PSME1_+_24605434.23-P1P2
SETD2	P1P2	1-2	significant	SETD2_-_47205192.23-P1P2	GGCCAAGCGGCTCGAAGTGG	1.0	5.0	empirical	SETD2_-_47205071.23-P1P2	TACGGTTACCGCCGTGTCCC	2.0	10.0	empirical	SETD2_-_47205192.23-P1P2|SETD2_-_47205071.23-P1P2
MAD2L2	P1P2	1-2	nonessential	MAD2L2_-_11741158.23-P1P2	GGCCGCGGGGAGCCACCGAC	1.0	1.0	predicted	MAD2L2_+_11741173.23-P1P2	CTCAACCCGGGGCCTCGGCC	2.0	2.0	predicted	MAD2L2_-_11741158.23-P1P2|MAD2L2_+_11741173.23-P1P2
GTF2F2	P1P2	1-2	significant	GTF2F2_-_45694663.23-P1P2	GTCCTCGGTTCCCAGTGTTC	1.0	3.0	empirical	GTF2F2_+_45694677.23-P1P2	GCTCTTCGCCTCTCAGCGCC	2.0	2.0	empirical	GTF2F2_-_45694663.23-P1P2|GTF2F2_+_45694677.23-P1P2
ATR	P1P2	1-2	essential	ATR_-_142297649.23-P1P2	GGCCCGACGGAGCCGTGTGG	1.0	2.0	essential	ATR_+_142297571.23-P1P2	CGCCAACGCGGGTTCCCGGC	2.0	1.0	essential	ATR_-_142297649.23-P1P2|ATR_+_142297571.23-P1P2
GINS3	P1P2	1-2	significant	GINS3_+_58426400.23-P1P2	GAGACTGGGCAGGATGGTTG	1.0	1.0	empirical	GINS3_+_58426428.23-P1P2	CGTCTTGTACACCCCTAACC	2.0	4.0	empirical	GINS3_+_58426400.23-P1P2|GINS3_+_58426428.23-P1P2
GPR61	P1P2	1-2	nonessential	GPR61_-_110082553.23-P1P2	GCTGAGAGGAGCTATCACAT	1.0	1.0	predicted	GPR61_-_110082539.23-P1P2	CTCAGCTGATGCTTCTCCAC	2.0	2.0	predicted	GPR61_-_110082553.23-P1P2|GPR61_-_110082539.23-P1P2
MRPS28	P1P2	1-2	significant	MRPS28_+_80942452.23-P1P2	GCTGTGTCGGACCCGTGCTG	1.0	3.0	empirical	MRPS28_-_80942263.23-P1P2	GGGCGGGTGAGAGGGAGTCC	2.0	1.0	empirical	MRPS28_+_80942452.23-P1P2|MRPS28_-_80942263.23-P1P2
RNF113A	P1P2	1-2	essential	RNF113A_-_119005686.23-P1P2	GTCGAAGCAAAAGACACTGA	1.0	8.0	essential	RNF113A_+_119005641.23-P1P2	CGTTGCGCGCTCCGCCGGGC	2.0	4.0	essential	RNF113A_-_119005686.23-P1P2|RNF113A_+_119005641.23-P1P2
SNAPC5	P1P2	1-2	nonessential	SNAPC5_-_66790097.23-P1P2	GGGTCACATAGCCAACCTCC	1.0	1.0	predicted	SNAPC5_+_66790086.23-P1P2	ACCTCCGGGCTGCTGTCGGC	2.0	2.0	predicted	SNAPC5_-_66790097.23-P1P2|SNAPC5_+_66790086.23-P1P2
EXOC2	P1P2	1-2	significant	EXOC2_+_693074.23-P1P2	GCTGGCGGCCGCGGAGTCTT	1.0	2.0	empirical	EXOC2_+_693061.23-P1P2	GTAGGTCTCGCCGAAGACTC	2.0	3.0	empirical	EXOC2_+_693074.23-P1P2|EXOC2_+_693061.23-P1P2
MED12	P1P2	1-2	essential	MED12_+_70338481.23-P1P2	GCGGCGGCCGAGAGACAACA	1.0	4.0	essential	MED12_+_70338552.23-P1P2	CCAGTCAGCCTGGCCCTGCC	2.0	6.0	essential	MED12_+_70338481.23-P1P2|MED12_+_70338552.23-P1P2
RBBP6	P1P2	1-2	significant	RBBP6_+_24550948.23-P1P2	GGGGGGCTCTCACCGAGCGG	1.0	7.0	empirical	RBBP6_+_24550884.23-P1P2	CAGTGGGGCGCTCGTCCGAC	2.0	8.0	empirical	RBBP6_+_24550948.23-P1P2|RBBP6_+_24550884.23-P1P2
ACTR6	P1P2	1-2	essential	ACTR6_-_100594606.23-P1P2	GCGGAAAGGGAAAACAACTA	1.0	2.0	essential	ACTR6_-_100594617.23-P1P2	CACCGCAGCCGTAGTTGTTC	2.0	6.0	essential	ACTR6_-_100594606.23-P1P2|ACTR6_-_100594617.23-P1P2
SCAP	P1P2	1-2	significant	SCAP_-_47517316.23-P1P2	GGGCAGCACCTCCCAAGCTG	1.0	3.0	empirical	SCAP_-_47517296.23-P1P2	CCACAGGTACCGTCACGCGC	2.0	1.0	empirical	SCAP_-_47517316.23-P1P2|SCAP_-_47517296.23-P1P2
OTOP1	P1P2	1-2	nonessential	OTOP1_+_4228580.23-P1P2	GGTGTCTCGAAGATGCTCGA	1.0	1.0	predicted	OTOP1_-_4228541.23-P1P2	CGGTCGCAGGGTCGTCGGGC	2.0	2.0	predicted	OTOP1_+_4228580.23-P1P2|OTOP1_-_4228541.23-P1P2
DDX59	P1P2	1-2	significant	DDX59_-_200638659.23-P1P2	GACTGGCGGGCCCTCCCCTC	1.0	4.0	empirical	DDX59_+_200639063.23-P1P2	CGGGTTTTGGGAGGGGGCCC	2.0	3.0	empirical	DDX59_-_200638659.23-P1P2|DDX59_+_200639063.23-P1P2
PELO	P1	1-2	essential	PELO_-_52095976.23-P1	GGCCAGCGGGAACTGTGTAG	1.0	1.0	essential	PELO_+_52095956.23-P1	GCGGGAACTGTGTAGGGGTC	2.0	2.0	essential	PELO_-_52095976.23-P1|PELO_+_52095956.23-P1
COPZ1	P2	1-2	essential	COPZ1_+_54695041.23-P2	GTTCGAGTGGACCATCAGGT	1.0	1.0	predicted	COPZ1_+_54694980.23-P2	TCCTTTTCAGCCCAGGAGTC	2.0	2.0	predicted	COPZ1_+_54695041.23-P2|COPZ1_+_54694980.23-P2
ARHGAP11B	P1P2	1-2	significant	ARHGAP11B_-_30918382.23-P1P2	GGGCGGAAGCATGAGGCTAA	1.0	9.0	empirical	ARHGAP11B_-_30918429.23-P1P2	CTACCTCCCGGCCTGCACAC	2.0	10.0	empirical	ARHGAP11B_-_30918382.23-P1P2|ARHGAP11B_-_30918429.23-P1P2
RUVBL1	P1P2	1-2	essential	RUVBL1_+_127842420.23-P1P2	GGGAGAACGCGCGAGAGGTG	1.0	7.0	essential	RUVBL1_+_127842630.23-P1P2	GAGTTACCATGCGGCCGTTC	2.0	3.0	essential	RUVBL1_+_127842420.23-P1P2|RUVBL1_+_127842630.23-P1P2
WNK1	P1P2	1-2	significant	WNK1_+_862246.23-P1P2	GACCAGGTCCGACGCCCGGG	1.0	1.0	empirical	WNK1_-_861784.23-P1P2	CCCGGGAAACTCTCCGCGCC	2.0	5.0	empirical	WNK1_+_862246.23-P1P2|WNK1_-_861784.23-P1P2
PSMA2	P1P2	1-2	significant	PSMA2_+_42971742.23-P1P2	GGGTAAAGATGGCGGAGCGC	1.0	1.0	empirical	PSMA2_+_42971715.23-P1P2	GAATGTAGTCAGCGAAAAGC	2.0	2.0	empirical	PSMA2_+_42971742.23-P1P2|PSMA2_+_42971715.23-P1P2
BCL2L1	P1	1-2	significant	BCL2L1_-_30310581.23-P1	GCCGGAGGGATCATGCGACC	1.0	2.0	empirical	BCL2L1_+_30310660.23-P1	GGATCGAGGGCGGCCGCTCC	2.0	1.0	empirical	BCL2L1_-_30310581.23-P1|BCL2L1_+_30310660.23-P1
FTSJ3	P1P2	1-2	essential	FTSJ3_-_61904976.23-P1P2	GGCAGGAGCGTCGGGTGGGT	1.0	2.0	essential	FTSJ3_+_61904432.23-P1P2	CACTTGGAACCGCACAAGTC	2.0	5.0	essential	FTSJ3_-_61904976.23-P1P2|FTSJ3_+_61904432.23-P1P2
SNRNP48	P1P2	1-2	essential	SNRNP48_-_7590517.23-P1P2	GGGCGAGCCTCCACCTGTGG	1.0	9.0	essential	SNRNP48_-_7590481.23-P1P2	ACCCGCCAAGAGGAAGCGGC	2.0	7.0	essential	SNRNP48_-_7590517.23-P1P2|SNRNP48_-_7590481.23-P1P2
FEN1	P1P2	1-2	significant	FEN1_-_61560380.23-P1P2	GCGGGAGCGCGGGCTTTGGA	1.0	3.0	empirical	FEN1_+_61560617.23-P1P2	CTGTGAGCCTTGGGCCAGTC	2.0	9.0	empirical	FEN1_-_61560380.23-P1P2|FEN1_+_61560617.23-P1P2
AARS	P1P2	1-2	essential	AARS_+_70323362.23-P1P2	GTGCAGCGGGCCCTTGGCGG	1.0	4.0	essential	AARS_-_70323332.23-P1P2	AGGAGAGGTAGGCCGCCCTC	2.0	5.0	essential	AARS_+_70323362.23-P1P2|AARS_-_70323332.23-P1P2
DDX46	P1	1-2	significant	DDX46_-_134094510.23-P1	GGGATGGCCGCCACAGCTGT	1.0	3.0	empirical	DDX46_-_134094650.23-P1	CACCGTGACTCCCGACCCAC	2.0	4.0	empirical	DDX46_-_134094510.23-P1|DDX46_-_134094650.23-P1
PSMC4	P1P2	1-2	essential	PSMC4_-_40477133.23-P1P2	GGAGGAGATAGGCATCTTGG	1.0	1.0	essential	PSMC4_-_40477115.23-P1P2	CCATAGTGACCAAGCCGGCC	2.0	7.0	essential	PSMC4_-_40477133.23-P1P2|PSMC4_-_40477115.23-P1P2
MRPS21	P1P2	1-2	essential	MRPS21_-_150266323.23-P1P2	GGTACTGAGCGCGCGAGGTG	1.0	4.0	essential	MRPS21_-_150266318.23-P1P2	CGCGCGCTCAGTACCTAGCC	2.0	1.0	essential	MRPS21_-_150266323.23-P1P2|MRPS21_-_150266318.23-P1P2
CRLS1	P1P2	1-2	significant	CRLS1_-_5986783.23-P1P2	GTAAAGTAGTATGGAGGCAG	1.0	2.0	empirical	CRLS1_-_5986777.23-P1P2	CCATACTACTTTACACACCC	2.0	1.0	empirical	CRLS1_-_5986783.23-P1P2|CRLS1_-_5986777.23-P1P2
MIS18BP1	P1P2	1-2	essential	MIS18BP1_+_45722381.23-P1P2	GGTGTTAGAGAACGTCGCGG	1.0	1.0	essential	MIS18BP1_+_45722268.23-P1P2	CAGTTCCGGCTCGGCTCCGC	2.0	7.0	essential	MIS18BP1_+_45722381.23-P1P2|MIS18BP1_+_45722268.23-P1P2
CNIH4	P1P2	1-2	significant	CNIH4_-_224544568.23-P1P2	GCCCGGCAAGGGCCTATCAG	1.0	3.0	empirical	CNIH4_-_224544955.23-P1P2	ACTCGGACCCGAGTGAGGGC	2.0	7.0	empirical	CNIH4_-_224544568.23-P1P2|CNIH4_-_224544955.23-P1P2
GUCD1	P1P2	1-2	essential	GUCD1_-_24951897.23-P1P2	GGAGACCGCGCTCAACACTG	1.0	8.0	essential	GUCD1_-_24951865.23-P1P2	CCTCACTCCGCCTGCCGGCC	2.0	5.0	essential	GUCD1_-_24951897.23-P1P2|GUCD1_-_24951865.23-P1P2
HMGB1	P1	1-2	nonessential	HMGB1_-_31040100.23-P1	GCAGCCAGCGCGGCTCCTAT	1.0	1.0	predicted	HMGB1_+_31040082.23-P1	GCGCGGCTCCTATTGGCTAC	2.0	2.0	predicted	HMGB1_-_31040100.23-P1|HMGB1_+_31040082.23-P1
TDGF1	P1P2	1-2	nonessential	TDGF1_-_46619550.23-P1P2	GTGCTAGAGATTGCCAGCTT	1.0	1.0	predicted	TDGF1_-_46619494.23-P1P2	GTAAGAGAAGCGGGCCATCC	2.0	2.0	predicted	TDGF1_-_46619550.23-P1P2|TDGF1_-_46619494.23-P1P2
TACC3	P2	1-2	significant	TACC3_+_1725320.23-P2	GGGCCAGCCACACACTGTAC	1.0	2.0	empirical	TACC3_+_1725283.23-P2	AAGAACCTGGCCAAAGCTAC	2.0	1.0	empirical	TACC3_+_1725320.23-P2|TACC3_+_1725283.23-P2
PSMB7	P1P2	1-2	essential	PSMB7_-_127177647.23-P1P2	GCCAAGCAAGGCGGCACCTG	1.0	5.0	essential	PSMB7_+_127177501.23-P1P2	CTGAGTCACACTAGCCGCGC	2.0	7.0	essential	PSMB7_-_127177647.23-P1P2|PSMB7_+_127177501.23-P1P2
LST1	P1	1-2	nonessential	LST1_+_31554051.23-P1	GGGATGGACAGACTCCAAAC	1.0	1.0	predicted	LST1_-_31554050.23-P1	GTGCTGTCTGGCTGAAGAGC	2.0	2.0	predicted	LST1_+_31554051.23-P1|LST1_-_31554050.23-P1
ILF2	P1P2	1-2	significant	ILF2_-_153643469.23-P1P2	GGAGTAGCAGACAACTGAAG	1.0	8.0	empirical	ILF2_+_153643443.23-P1P2	CTGAGTAGCAGACAACTGAC	2.0	5.0	empirical	ILF2_-_153643469.23-P1P2|ILF2_+_153643443.23-P1P2
USP19	P1P2	1-2	nonessential	USP19_+_49158108.23-P1P2	GGGCCGCGGCGGCCTGTTCA	1.0	1.0	predicted	USP19_-_49158246.23-P1P2	GAACGGAGAGCGGGTTGCCC	2.0	2.0	predicted	USP19_+_49158108.23-P1P2|USP19_-_49158246.23-P1P2
BUB1B	P1P2	1-2	significant	BUB1B_-_40453297.23-P1P2	GTGAGGTGGCCGGTTTGTTA	1.0	4.0	empirical	BUB1B_-_40453273.23-P1P2	ACACCCCTAGCCGCCAAGTC	2.0	3.0	empirical	BUB1B_-_40453297.23-P1P2|BUB1B_-_40453273.23-P1P2
GTF3C6	P1P2	1-2	significant	GTF3C6_-_111280005.23-P1P2	GGCGGACGAGCGGAGTCCAG	1.0	4.0	empirical	GTF3C6_-_111279959.23-P1P2	CGCCTTCTAGTCACTGGCCC	2.0	5.0	empirical	GTF3C6_-_111280005.23-P1P2|GTF3C6_-_111279959.23-P1P2
ABCF1	P1	1-2	significant	ABCF1_+_30539238.23-P1	GGTGGCAGTTACAGCTACTG	1.0	1.0	empirical	ABCF1_+_30539469.23-P1	GGGAGGAGTTTGCCGGGGAC	2.0	3.0	empirical	ABCF1_+_30539238.23-P1|ABCF1_+_30539469.23-P1
CADM4	P1P2	1-2	nonessential	CADM4_+_44143915.23-P1P2	GCCGGGCCCGGCGCTTCCAG	1.0	1.0	predicted	CADM4_+_44143932.23-P1P2	GGCCCATGGTGCCGCCGCCC	2.0	2.0	predicted	CADM4_+_44143915.23-P1P2|CADM4_+_44143932.23-P1P2
FNBP4	P1P2	1-2	significant	FNBP4_-_47788874.23-P1P2	GGCGAGCAGAGAGCGTCGGG	1.0	5.0	empirical	FNBP4_+_47788834.23-P1P2	CATCGCGAGCCCAAGCGCGC	2.0	10.0	empirical	FNBP4_-_47788874.23-P1P2|FNBP4_+_47788834.23-P1P2
TUBE1	P1P2	1-2	significant	TUBE1_-_112408676.23-P1P2	GCCGGGAGCTTGCTAGCCCG	1.0	4.0	empirical	TUBE1_-_112408641.23-P1P2	CCATGACCCAGTCGGTGGTC	2.0	1.0	empirical	TUBE1_-_112408676.23-P1P2|TUBE1_-_112408641.23-P1P2
INTS6	P1P2	1-2	significant	INTS6_+_52027153.23-P1P2	GAGCGCTTCAGTAGCGAGAG	1.0	4.0	empirical	INTS6_+_52027127.23-P1P2	CGGCGGTGTCACCACTTTCC	2.0	7.0	empirical	INTS6_+_52027153.23-P1P2|INTS6_+_52027127.23-P1P2
PSME2	P1P2	1-2	nonessential	PSME2_+_24615830.23-P1P2	GGGAGTGAAAGCGAAAGCCC	1.0	1.0	predicted	PSME2_-_24615835.23-P1P2	GGGCGACTAGCCGGGAGACC	2.0	2.0	predicted	PSME2_+_24615830.23-P1P2|PSME2_-_24615835.23-P1P2
PSMB4	P1P2	1-2	nonessential	PSMB4_+_151372088.23-P1P2	GGGACCCCCCGCCCAAAGTC	1.0	1.0	predicted	PSMB4_-_151372066.23-P1P2	TCTTAGTCACGGTAGCAGAC	2.0	2.0	predicted	PSMB4_+_151372088.23-P1P2|PSMB4_-_151372066.23-P1P2
SRRM1	P1P2	1-2	significant	SRRM1_+_24970012.23-P1P2	GGGAGGAGGAGACTGCGCAG	1.0	4.0	empirical	SRRM1_-_24969785.23-P1P2	AGGGTACACCGCGCCGCCGC	2.0	1.0	empirical	SRRM1_+_24970012.23-P1P2|SRRM1_-_24969785.23-P1P2
RANBP2	P1P2	1-2	significant	RANBP2_-_109335960.23-P1P2	GAGTGGTCCTCCGCCGGCTA	1.0	3.0	empirical	RANBP2_+_109335924.23-P1P2	CAAGTTCGTCACAGTGGTCC	2.0	9.0	empirical	RANBP2_-_109335960.23-P1P2|RANBP2_+_109335924.23-P1P2
PPP2R3C	P1P2	1-2	significant	PPP2R3C_+_35591052.23-P1P2	GCCCGGCCCTAAACTCCTAG	1.0	7.0	empirical	PPP2R3C_+_35590978.23-P1P2	CCTTTGTCGGGAGGTTTCAC	2.0	9.0	empirical	PPP2R3C_+_35591052.23-P1P2|PPP2R3C_+_35590978.23-P1P2
ADAT3	P1	1-2	significant	ADAT3_-_1905438.23-P1	GGCTCGCGCCCGGATCCCTC	1.0	2.0	empirical	ADAT3_+_1905424.23-P1	GGATCCCTCAGGTAAGCGCC	2.0	4.0	empirical	ADAT3_-_1905438.23-P1|ADAT3_+_1905424.23-P1
RPL37A	P1P2	1-2	essential	RPL37A_-_217363600.23-P1P2	GGACCTAGGTCGCGGCGACA	1.0	4.0	essential	RPL37A_-_217363610.23-P1P2	ACACTCACCATGTCGCCGCC	2.0	1.0	essential	RPL37A_-_217363600.23-P1P2|RPL37A_-_217363610.23-P1P2
TRA2B	P1P2	1-2	significant	TRA2B_+_185655778.23-P1P2	GAGCCCGTGCGGAGGCGGTG	1.0	6.0	empirical	TRA2B_+_185655783.23-P1P2	CCTCCGCACGGGCTCTAACC	2.0	1.0	empirical	TRA2B_+_185655778.23-P1P2|TRA2B_+_185655783.23-P1P2
CENPA	P1	1-2	essential	CENPA_+_26987565.23-P1	GCACTGGAAGGGCCGTGGAA	1.0	7.0	empirical	CENPA_-_26987167.23-P1	GGGGTCTCCTGCGCGAGCGC	1.0	1.0	predicted	CENPA_+_26987565.23-P1|CENPA_-_26987167.23-P1
SLC7A6OS	P1P2	1-2	significant	SLC7A6OS_-_68344821.23-P1P2	GCGGAGTACAGCGGTCCTGG	1.0	4.0	empirical	SLC7A6OS_-_68344774.23-P1P2	GCGGAGGCTCTTGTGCTCGC	2.0	1.0	empirical	SLC7A6OS_-_68344821.23-P1P2|SLC7A6OS_-_68344774.23-P1P2
GSPT1	P1P2	1-2	significant	GSPT1_-_12009772.23-P1P2	GCTCGCGACGACGACAGAGG	1.0	3.0	empirical	GSPT1_-_12009714.23-P1P2	GGGATCTTTGTCGCTAGCTC	2.0	2.0	empirical	GSPT1_-_12009772.23-P1P2|GSPT1_-_12009714.23-P1P2
SLC39A7	P1P2	1-2	significant	SLC39A7_-_33168697.23-P1P2	GCGTCCAAGCAAACCGGGAA	1.0	2.0	empirical	SLC39A7_-_33168709.23-P1P2	GGATCCTCTCCTTTCCCGGC	2.0	1.0	empirical	SLC39A7_-_33168697.23-P1P2|SLC39A7_-_33168709.23-P1P2
METTL17	P1P2	1-2	essential	METTL17_-_21458170.23-P1P2	GGCCTCCGGAGCCATGGCGG	1.0	3.0	essential	METTL17_-_21458167.23-P1P2	CCATGGCTCCGGAGGCGAAC	2.0	4.0	essential	METTL17_-_21458170.23-P1P2|METTL17_-_21458167.23-P1P2
SRSF11	P1	1-2	significant	SRSF11_+_70671425.23-P1	GCAGGACGCTAGGCCGGCAC	1.0	1.0	predicted	SRSF11_+_70671413.23-P1	TTTCCGTTGCCGGTGCCGGC	2.0	2.0	predicted	SRSF11_+_70671425.23-P1|SRSF11_+_70671413.23-P1
RABGGTA	P1P2	1-2	significant	RABGGTA_-_24740707.23-P1P2	GACCCACCTGCGCTGGGAGG	1.0	4.0	empirical	RABGGTA_-_24740777.23-P1P2	GGACGTGGCGCCGCTCTAGC	2.0	2.0	empirical	RABGGTA_-_24740707.23-P1P2|RABGGTA_-_24740777.23-P1P2
CCND1	P2	1-2	significant	CCND1_-_69467368.23-P2	GTTGAAAGTAGGGACCTCAG	1.0	1.0	predicted	CCND1_+_69467581.23-P2	TTGATGTTACAGATTTAATC	2.0	2.0	predicted	CCND1_-_69467368.23-P2|CCND1_+_69467581.23-P2
RPL3	P1P2	1-2	significant	RPL3_+_39715369.23-P1P2	GGGCCAGAGAGAGGCCGTAA	1.0	8.0	empirical	RPL3_+_39715378.23-P1P2	CTCTCTGGCCGACCTGCAGC	2.0	6.0	empirical	RPL3_+_39715369.23-P1P2|RPL3_+_39715378.23-P1P2
DDX46	P2	1-2	significant	DDX46_-_134109485.23-P2	GAAAAGGCTATGGAAAACAT	1.0	1.0	predicted	DDX46_-_134109475.23-P2	TAGCCTTTTTACGTTGCTCC	2.0	2.0	predicted	DDX46_-_134109485.23-P2|DDX46_-_134109475.23-P2
NKAP	P1P2	1-2	essential	NKAP_-_119077682.23-P1P2	GGCGGAACAGCCCAAATCTG	1.0	7.0	essential	NKAP_+_119077637.23-P1P2	TGGTTCCCGGGACCTGCCGC	2.0	2.0	essential	NKAP_-_119077682.23-P1P2|NKAP_+_119077637.23-P1P2
PRIM1	P1P2	1-2	essential	PRIM1_+_57146097.23-P1P2	GCCTGTGGTAATCCTTACCG	1.0	3.0	essential	PRIM1_-_57146107.23-P1P2	TACCGTGGCGAGTTCCGCGC	2.0	4.0	essential	PRIM1_+_57146097.23-P1P2|PRIM1_-_57146107.23-P1P2
DDOST	P1P2	1-2	significant	DDOST_+_20987846.23-P1P2	GTGGGTCCTTCGGCAGGAGG	1.0	1.0	empirical	DDOST_-_20987605.23-P1P2	TTTCCTGGAGCAGGCCGCCC	2.0	5.0	empirical	DDOST_+_20987846.23-P1P2|DDOST_-_20987605.23-P1P2
UBE2H	P1P2	1-2	significant	UBE2H_+_129592745.23-P1P2	GAGGAGTCGTCCGCTTATAG	1.0	2.0	empirical	UBE2H_+_129592365.23-P1P2	CCTCTTGCCCGGACTGGGAC	2.0	8.0	empirical	UBE2H_+_129592745.23-P1P2|UBE2H_+_129592365.23-P1P2
HIST1H2BN	P1P2	1-2	nonessential	HIST1H2BN_-_27806378.23-P1P2	GGAAGCAGTGAATAAGCGGT	1.0	1.0	predicted	HIST1H2BN_-_27806374.23-P1P2	CTTATTCACTGCTTCTTAAC	2.0	2.0	predicted	HIST1H2BN_-_27806378.23-P1P2|HIST1H2BN_-_27806374.23-P1P2
SRSF7	P1P2	1-2	significant	SRSF7_+_38978481.23-P1P2	GGTAGTGCCGCCGGGACTCT	1.0	4.0	empirical	SRSF7_-_38978026.23-P1P2	TGGTGGCGCATTTCCTCAGC	2.0	10.0	empirical	SRSF7_+_38978481.23-P1P2|SRSF7_-_38978026.23-P1P2
RCC1	P1	1-2	essential	RCC1_+_28832591.23-P1	GCCAAGGATCACACTTACCA	1.0	4.0	essential	RCC1_-_28832596.23-P1	AGGAGAAGAAGCGACCACTC	2.0	1.0	essential	RCC1_+_28832591.23-P1|RCC1_-_28832596.23-P1
NDUFA8	P1P2	1-2	significant	NDUFA8_+_124922020.23-P1P2	GTGGCACTCGGCGGTCGAAA	1.0	5.0	empirical	NDUFA8_+_124922010.23-P1P2	TGAACTCCCCTTTCGACCGC	2.0	3.0	empirical	NDUFA8_+_124922020.23-P1P2|NDUFA8_+_124922010.23-P1P2
PSMC6	P1P2	1-2	significant	PSMC6_-_53174195.23-P1P2	GTGTGGAGCAGCACTCCTTC	1.0	6.0	empirical	PSMC6_+_53174114.23-P1P2	TAGAGATGACCAGGCCTAGC	2.0	3.0	empirical	PSMC6_-_53174195.23-P1P2|PSMC6_+_53174114.23-P1P2
GEMIN6	P1P2	1-2	significant	GEMIN6_-_39005409.23-P1P2	GCTGAGTACCCAGAGTTGCG	1.0	1.0	empirical	GEMIN6_+_39005603.23-P1P2	CTCGATGGCGGGATCCAGCC	2.0	4.0	empirical	GEMIN6_-_39005409.23-P1P2|GEMIN6_+_39005603.23-P1P2
BOP1	P2	1-2	significant	BOP1_-_145512830.23-P2	GCTGTGGCCCTCGTCATCAA	1.0	1.0	predicted	BOP1_+_145512867.23-P2	CACTGCTGTCACTGCCGGAC	2.0	2.0	predicted	BOP1_-_145512830.23-P2|BOP1_+_145512867.23-P2
POLR1E	P1P2	1-2	essential	POLR1E_-_37486076.23-P1P2	GGGTGTTGCCGAGTGCGAGG	1.0	1.0	essential	POLR1E_+_37486167.23-P1P2	TCTCGGTACCTCAGCTGTCC	2.0	4.0	essential	POLR1E_-_37486076.23-P1P2|POLR1E_+_37486167.23-P1P2
DMRTA2	P1P2	1-2	nonessential	DMRTA2_+_50889102.23-P1P2	GGAGCGGCTCATTGAGAGTC	1.0	1.0	predicted	DMRTA2_+_50889084.23-P1P2	AGTTGCCCGGCGCTGCCAGC	2.0	2.0	predicted	DMRTA2_+_50889102.23-P1P2|DMRTA2_+_50889084.23-P1P2
NOP9	P1P2	1-2	significant	NOP9_+_24769138.23-P1P2	GGTGTGCTTCGCGACCTGTC	1.0	4.0	empirical	NOP9_-_24769165.23-P1P2	CATGTGTGCTTCGCGACCTC	2.0	1.0	empirical	NOP9_+_24769138.23-P1P2|NOP9_-_24769165.23-P1P2
LENG8	P1P2	1-2	significant	LENG8_+_54960715.23-P1P2	GGGGGCCCCGAGAACTCCAA	1.0	5.0	empirical	LENG8_-_54960616.23-P1P2	CACCCTGTCGACGCTCGCGC	2.0	3.0	empirical	LENG8_+_54960715.23-P1P2|LENG8_-_54960616.23-P1P2
POLA1	P1P2	1-2	significant	POLA1_-_24712081.23-P1P2	GATCGGGAGATTCGGGACCA	1.0	4.0	empirical	POLA1_-_24712065.23-P1P2	GATTCCGCGCCAACCAGCCC	2.0	9.0	empirical	POLA1_-_24712081.23-P1P2|POLA1_-_24712065.23-P1P2
KARS	P1P2	1-2	significant	KARS_-_75681566.23-P1P2	GAGGGCCCGACCCAAAAGTA	1.0	2.0	empirical	KARS_-_75681569.23-P1P2	CCTTACTTTTGGGTCGGGCC	2.0	5.0	empirical	KARS_-_75681566.23-P1P2|KARS_-_75681569.23-P1P2
INTS3	P1P2	1-2	essential	INTS3_+_153700546.23-P1P2	GCACACAGAAGCGGCCATAG	1.0	6.0	essential	INTS3_+_153700541.23-P1P2	TTCCACTATGGCCGCTTCTC	2.0	4.0	essential	INTS3_+_153700546.23-P1P2|INTS3_+_153700541.23-P1P2
COPS6	P1P2	1-2	essential	COPS6_-_99686651.23-P1P2	GGGCGGCTGCAGCTACGAAC	1.0	1.0	essential	COPS6_-_99686659.23-P1P2	CCGGTCCCGTTCGTAGCTGC	2.0	3.0	essential	COPS6_-_99686651.23-P1P2|COPS6_-_99686659.23-P1P2
RCOR1	P1P2	1-2	significant	RCOR1_-_103058986.23-P1P2	GTCGCTGCTCCCGGAGTAGT	1.0	4.0	empirical	RCOR1_+_103058974.23-P1P2	GAGTAGTTGGTGCCAGTGAC	2.0	3.0	empirical	RCOR1_-_103058986.23-P1P2|RCOR1_+_103058974.23-P1P2
PPP1R12A	P1P2	1-2	significant	PPP1R12A_-_80328652.23-P1P2	GGGAGGCTCGAGGTCCGTCT	1.0	3.0	empirical	PPP1R12A_-_80328635.23-P1P2	CCGGTGGTGAAGCGCCAGAC	2.0	10.0	empirical	PPP1R12A_-_80328652.23-P1P2|PPP1R12A_-_80328635.23-P1P2
SEC62	P1P2	1-2	significant	SEC62_-_169684596.23-P1P2	GCTCCACGTCAGAGGGAACC	1.0	4.0	empirical	SEC62_-_169684666.23-P1P2	AGAGCTCGGCTTTGCTACCC	2.0	2.0	empirical	SEC62_-_169684596.23-P1P2|SEC62_-_169684666.23-P1P2
CAMLG	P1P2	1-2	significant	CAMLG_+_134074264.23-P1P2	GGTGGCAGTGGCGGTGATGT	1.0	5.0	empirical	CAMLG_+_134074249.23-P1P2	TCGCAGCGGCGGCCAACATC	2.0	1.0	empirical	CAMLG_+_134074264.23-P1P2|CAMLG_+_134074249.23-P1P2
TIMM23	ENST00000260867.4	1-2	essential	TIMM23_+_51623265.23-ENST00000260867.4	GTTGAGGAGTAACGGCCCAG	1.0	6.0	essential	TIMM23_+_51623316.23-ENST00000260867.4	ACTTCACACGCTGACCTTCC	2.0	8.0	essential	TIMM23_+_51623265.23-ENST00000260867.4|TIMM23_+_51623316.23-ENST00000260867.4
NFKBIE	P1P2	1-2	significant	NFKBIE_-_44233230.23-P1P2	GCGGGCTGTGGGGCTCCGAG	1.0	1.0	empirical	NFKBIE_+_44233200.23-P1P2	CCTTCCCGGGCTGTGGGGCC	2.0	5.0	empirical	NFKBIE_-_44233230.23-P1P2|NFKBIE_+_44233200.23-P1P2
KIAA0391	P1P2	1-2	significant	KIAA0391_+_35591777.23-P1P2	GGCGGCACTCAGACTTAACG	1.0	4.0	empirical	KIAA0391_+_35591884.23-P1P2	GAGTCGTTGGCGCAGCTGAC	2.0	8.0	empirical	KIAA0391_+_35591777.23-P1P2|KIAA0391_+_35591884.23-P1P2
COX11	P1P2	1-2	essential	COX11_+_53045977.23-P1P2	GGCTCTGGCGTCCTGGATGG	1.0	3.0	essential	COX11_+_53045613.23-P1P2	CCCTGCGGGCGGCGCCGGCC	2.0	7.0	essential	COX11_+_53045977.23-P1P2|COX11_+_53045613.23-P1P2
PAXBP1	P1P2	1-2	essential	PAXBP1_-_34143986.23-P1P2	GGCCTTTCGGAACATCCCCG	1.0	1.0	essential	PAXBP1_-_34143891.23-P1P2	CCGTTGTTGCCGCCGCCGGC	2.0	5.0	essential	PAXBP1_-_34143986.23-P1P2|PAXBP1_-_34143891.23-P1P2
CHMP7	P1P2	1-2	significant	CHMP7_-_23104167.23-P1P2	GCGAGGGCGGAAGCGGACCA	1.0	2.0	empirical	CHMP7_-_23104196.23-P1P2	CGGCAAGGCTGCGAACACAC	2.0	3.0	empirical	CHMP7_-_23104167.23-P1P2|CHMP7_-_23104196.23-P1P2
PHAX	P2	1-2	essential	PHAX_+_125939292.23-P2	GGCAGTTGCCGTGTTCTGGA	1.0	1.0	predicted	PHAX_-_125939291.23-P2	TCATAGCACTGTCGCCACCC	2.0	2.0	predicted	PHAX_+_125939292.23-P2|PHAX_-_125939291.23-P2
PWP2	P1P2	1-2	significant	PWP2_-_45527277.23-P1P2	GCGGCCGCCGGGTTGAGCTG	1.0	1.0	empirical	PWP2_-_45527254.23-P1P2	CAGAGACACTTCCCGGGGGC	2.0	2.0	empirical	PWP2_-_45527277.23-P1P2|PWP2_-_45527254.23-P1P2
ANAPC5	P1P2	1-2	essential	ANAPC5_+_121790181.23-P1P2	GGCCTTGTGGTGACAACTGG	1.0	1.0	essential	ANAPC5_-_121790201.23-P1P2	TGTGGTGACAACTGGCGGCC	2.0	3.0	essential	ANAPC5_+_121790181.23-P1P2|ANAPC5_-_121790201.23-P1P2
VPS29	P1P2	1-2	essential	VPS29_+_110939852.23-P1P2	GGCGGAGCCCGGTGACAGGA	1.0	4.0	essential	VPS29_+_110939846.23-P1P2	TCACCATCCTGTCACCGGGC	2.0	3.0	essential	VPS29_+_110939852.23-P1P2|VPS29_+_110939846.23-P1P2
MRPS2	P1P2	1-2	essential	MRPS2_+_138392554.23-P1P2	GGCGGCCGAGGATGTCGCCA	1.0	1.0	essential	MRPS2_-_138392571.23-P1P2	AGGATGTCGCCATGGCTGGC	2.0	4.0	essential	MRPS2_+_138392554.23-P1P2|MRPS2_-_138392571.23-P1P2
RPP40	P1P2	1-2	essential	RPP40_-_5004221.23-P1P2	GCCGCGGCGCCTCCCGAAGC	1.0	6.0	essential	RPP40_+_5004190.23-P1P2	GTAAGTGCCGCGGCGCCTCC	2.0	1.0	essential	RPP40_-_5004221.23-P1P2|RPP40_+_5004190.23-P1P2
TUBB	P2	1-2	significant	TUBB_+_30689505.23-P2	GGTCCCAAGTGCTCGGTGGG	1.0	10.0	empirical	TUBB_+_30689619.23-P2	TAGAACAACGGCCTGAGCGC	2.0	1.0	empirical	TUBB_+_30689505.23-P2|TUBB_+_30689619.23-P2
WDR1	P1P2	1-2	significant	WDR1_-_10117920.23-P1P2	GGGGGACGGCGGGGACAGAA	1.0	4.0	empirical	WDR1_+_10118295.23-P1P2	ACTTGTTACCGCGCCGCGCC	2.0	1.0	empirical	WDR1_-_10117920.23-P1P2|WDR1_+_10118295.23-P1P2
YBX1	P1P2	1-2	significant	YBX1_+_43148077.23-P1P2	GCTAGCGAGAATGGCGGGAC	1.0	2.0	empirical	YBX1_+_43148871.23-P1P2	TGGAGCGCCCCGCGCTTCAC	2.0	5.0	empirical	YBX1_+_43148077.23-P1P2|YBX1_+_43148871.23-P1P2
ELAC2	P1P2	1-2	significant	ELAC2_+_12921295.23-P1P2	GAAACGCGGGCGTAGGTGAC	1.0	2.0	empirical	ELAC2_+_12921317.23-P1P2	GTGCACCACCTAGCCGCTCC	2.0	7.0	empirical	ELAC2_+_12921295.23-P1P2|ELAC2_+_12921317.23-P1P2
ARIH1	P1P2	1-2	significant	ARIH1_-_72766733.23-P1P2	GTTTCTCTCGGAGGCCGGAG	1.0	1.0	empirical	ARIH1_-_72766686.23-P1P2	CTGCTATCGCTACTGAGCCC	2.0	6.0	empirical	ARIH1_-_72766733.23-P1P2|ARIH1_-_72766686.23-P1P2
GRPEL1	P1P2	1-2	significant	GRPEL1_+_7069324.23-P1P2	GGAGGCAGCCGCAACTTGTG	1.0	3.0	empirical	GRPEL1_+_7069734.23-P1P2	ACCTCACGCACTGAGCCGCC	2.0	5.0	empirical	GRPEL1_+_7069324.23-P1P2|GRPEL1_+_7069734.23-P1P2
NEMF	P1P2	1-2	significant	NEMF_-_50319451.23-P1P2	GAGTACGGCGCGGAGGTCAA	1.0	7.0	empirical	NEMF_+_50319478.23-P1P2	GAGGGTCACTACCGCAAGTC	2.0	6.0	empirical	NEMF_-_50319451.23-P1P2|NEMF_+_50319478.23-P1P2
EIF4B	P1P2	1-2	nonessential	EIF4B_+_53400192.23-P1P2	GATAGCGGGCGCGTCGAGCT	1.0	1.0	predicted	EIF4B_-_53400313.23-P1P2	AGTCCTTGGCCGCGCTCGGC	2.0	2.0	predicted	EIF4B_+_53400192.23-P1P2|EIF4B_-_53400313.23-P1P2
ATP6V1G1	P1P2	1-2	significant	ATP6V1G1_+_117350079.23-P1P2	GGAGCAAGGCAAGCGGCCTA	1.0	1.0	empirical	ATP6V1G1_-_117350067.23-P1P2	CTTGGGTCAGCTGACACAGC	2.0	5.0	empirical	ATP6V1G1_+_117350079.23-P1P2|ATP6V1G1_-_117350067.23-P1P2
PLA2G10	ENST00000438167.3	1-2	nonessential	PLA2G10_-_14788222.23-ENST00000438167.3	GGCCCAAGCAGAGCCAGCTA	1.0	1.0	predicted	PLA2G10_-_14788129.23-ENST00000438167.3	CCGGTGGCCCTGCAGCACCC	2.0	2.0	predicted	PLA2G10_-_14788222.23-ENST00000438167.3|PLA2G10_-_14788129.23-ENST00000438167.3
NCAPD3	P1P2	1-2	significant	NCAPD3_-_134093829.23-P1P2	GCAACGCCACCATGATCCCA	1.0	1.0	empirical	NCAPD3_-_134093802.23-P1P2	TGGTAGCGGCCTGCAGCCCC	2.0	4.0	empirical	NCAPD3_-_134093829.23-P1P2|NCAPD3_-_134093802.23-P1P2
RPL5	P1P2	1-2	essential	RPL5_+_93297664.23-P1P2	GGCATCCACTCACCATCCTG	1.0	3.0	essential	RPL5_-_93297968.23-P1P2	CCTCACACTAGACGGCAGTC	2.0	9.0	essential	RPL5_+_93297664.23-P1P2|RPL5_-_93297968.23-P1P2
NDUFB7	P1P2	1-2	significant	NDUFB7_-_14682785.23-P1P2	GCTCCACCGAGGCATCGCCC	1.0	8.0	empirical	NDUFB7_+_14682513.23-P1P2	TTGGGCTGGAACGCCTCCAC	2.0	4.0	empirical	NDUFB7_-_14682785.23-P1P2|NDUFB7_+_14682513.23-P1P2
FAM72D	ENST00000400889.1	1-2	nonessential	FAM72D_-_143913113.23-ENST00000400889.1	GGGTCTGTCACCGAACACGT	1.0	1.0	predicted	FAM72D_+_143913122.23-ENST00000400889.1	TCTTCCGCTTTTCCTGCCTC	2.0	2.0	predicted	FAM72D_-_143913113.23-ENST00000400889.1|FAM72D_+_143913122.23-ENST00000400889.1
OR1E2	ENST00000248384.1	1-2	nonessential	OR1E2_+_3336672.23-ENST00000248384.1	GATGCTCTGTCTCTCCGTGG	1.0	1.0	predicted	OR1E2_+_3336675.23-ENST00000248384.1	CGGAGAGACAGAGCATGGGC	2.0	2.0	predicted	OR1E2_+_3336672.23-ENST00000248384.1|OR1E2_+_3336675.23-ENST00000248384.1
SHFM1	P1P2	1-2	essential	SHFM1_+_96339147.23-P1P2	GTCGGAGGCGGTAGTGACGG	1.0	2.0	essential	SHFM1_+_96339150.23-P1P2	TCACTACCGCCTCCGACGCC	2.0	1.0	essential	SHFM1_+_96339147.23-P1P2|SHFM1_+_96339150.23-P1P2
ESPN	P2	1-2	nonessential	ESPN_-_6508158.23-P2	GACAGCCAGGTGCACAGCGG	1.0	1.0	predicted	ESPN_+_6508187.23-P2	CCGGACGGGCAACCGGGGTC	2.0	2.0	predicted	ESPN_-_6508158.23-P2|ESPN_+_6508187.23-P2
TAMM41	P1P2	1-2	essential	TAMM41_-_11888321.23-P1P2	GGAGAAGACGCAGCCCAGAT	1.0	3.0	essential	TAMM41_-_11888331.23-P1P2	ACCCGAGCCTATCTGGGCTC	2.0	7.0	essential	TAMM41_-_11888321.23-P1P2|TAMM41_-_11888331.23-P1P2
JAZF1	P1P2	1-2	significant	JAZF1_+_28219944.23-P1P2	GGCGCGTGCGAGCCCCGAGG	1.0	5.0	empirical	JAZF1_+_28220008.23-P1P2	TTCCGGGGCTCCCCGCCCGC	2.0	10.0	empirical	JAZF1_+_28219944.23-P1P2|JAZF1_+_28220008.23-P1P2
TANGO6	P1P2	1-2	essential	TANGO6_-_68877660.23-P1P2	GGCTGGACCCGGGACTCTCA	1.0	3.0	essential	TANGO6_-_68877504.23-P1P2	CGCTCGCGACCCGCTCAGGC	2.0	2.0	essential	TANGO6_-_68877660.23-P1P2|TANGO6_-_68877504.23-P1P2
BUD31	P1P2	1-2	significant	BUD31_+_99006639.23-P1P2	GCCAAGGTAATCGAGAACAG	1.0	4.0	empirical	BUD31_+_99006585.23-P1P2	TCTGTCGAGAAGCAGCTACC	2.0	1.0	empirical	BUD31_+_99006639.23-P1P2|BUD31_+_99006585.23-P1P2
TRIM49C	ENST00000432771.1,ENST00000448984.1	1-2	nonessential	TRIM49C_-_89764362.23-ENST00000432771.1,ENST00000448984.1	GAGCGGGGGATTTCTTTTCC	1.0	1.0	predicted	TRIM49C_+_89764400.23-ENST00000432771.1,ENST00000448984.1	CACAATTGGGTAAGTCAAGC	2.0	2.0	predicted	TRIM49C_-_89764362.23-ENST00000432771.1,ENST00000448984.1|TRIM49C_+_89764400.23-ENST00000432771.1,ENST00000448984.1
PPWD1	P1P2	1-2	significant	PPWD1_-_64859203.23-P1P2	GCGCCGGGACCCGGAGGAAC	1.0	3.0	empirical	PPWD1_-_64859355.23-P1P2	GGTACTATGTCTGCAGCTAC	2.0	1.0	empirical	PPWD1_-_64859203.23-P1P2|PPWD1_-_64859355.23-P1P2
SRBD1	P1P2	1-2	essential	SRBD1_-_45838340.23-P1P2	GACCCGCAAGACGACCGCCA	1.0	1.0	essential	SRBD1_+_45838356.23-P1P2	TCCCGCCCGGCACGTCAGAC	2.0	5.0	essential	SRBD1_-_45838340.23-P1P2|SRBD1_+_45838356.23-P1P2
HAUS3	P1P2	1-2	significant	HAUS3_-_2243782.23-P1P2	GGGCCCGCGTCAGTCACCTC	1.0	1.0	empirical	HAUS3_+_2243788.23-P1P2	CTTGCTTCTCGCAGGAGCCC	2.0	2.0	empirical	HAUS3_-_2243782.23-P1P2|HAUS3_+_2243788.23-P1P2
HNRNPL	P1	1-2	significant	HNRNPL_-_39340587.23-P1	GGACGCCGCTTCTCCGCCCG	1.0	3.0	empirical	HNRNPL_+_39340578.23-P1	CCCGGGGCAGCAGCCTCCGC	2.0	3.0	empirical	HNRNPL_-_39340587.23-P1|HNRNPL_+_39340578.23-P1
MED6	P1P2	1-2	essential	MED6_+_71067331.23-P1P2	GTGGCGGCGGTGGATATCCG	1.0	3.0	essential	MED6_+_71067347.23-P1P2	CCATAATTCCGAGAGCGTTC	2.0	4.0	essential	MED6_+_71067331.23-P1P2|MED6_+_71067347.23-P1P2
PSMD7	P1P2	1-2	essential	PSMD7_-_74330744.23-P1P2	GACTGGGCCTGAAAGGGTAC	1.0	1.0	essential	PSMD7_-_74330738.23-P1P2	TTTCAGGCCCAGTTCCTCTC	2.0	5.0	essential	PSMD7_-_74330744.23-P1P2|PSMD7_-_74330738.23-P1P2
OTX1	P1P2	1-2	nonessential	OTX1_-_63277951.23-P1P2	GGCGTTCACATACCCGGGGA	1.0	1.0	predicted	OTX1_-_63277962.23-P1P2	TTCTACTGCCCTCCCCGGGC	2.0	2.0	predicted	OTX1_-_63277951.23-P1P2|OTX1_-_63277962.23-P1P2
CEP68	P1P2	1-2	nonessential	CEP68_-_65283588.23-P1P2	GAGGGCCGCAGTTGCAGTCA	1.0	1.0	predicted	CEP68_-_65283603.23-P1P2	CGAGCTGGCGGACCCTGACC	2.0	2.0	predicted	CEP68_-_65283588.23-P1P2|CEP68_-_65283603.23-P1P2
LONP1	P1P2	1-2	essential	LONP1_+_5720108.23-P1P2	GCTGGCTACGTGCGACTGTG	1.0	4.0	essential	LONP1_+_5720103.23-P1P2	CTCCCCACAGTCGCACGTAC	2.0	3.0	essential	LONP1_+_5720108.23-P1P2|LONP1_+_5720103.23-P1P2
SPC24	P1P2	1-2	essential	SPC24_+_11266448.23-P1P2	GTTGGAGCCTGGCGTAGTCA	1.0	2.0	essential	SPC24_+_11266414.23-P1P2	TGGCTCACCTCCTCTATGTC	2.0	4.0	essential	SPC24_+_11266448.23-P1P2|SPC24_+_11266414.23-P1P2
SSBP1	P1P2	1-2	essential	SSBP1_+_141438412.23-P1P2	GGCTAGCCAGCCACACCATA	1.0	5.0	essential	SSBP1_+_141438407.23-P1P2	CTCCCTATGGTGTGGCTGGC	2.0	4.0	essential	SSBP1_+_141438412.23-P1P2|SSBP1_+_141438407.23-P1P2
AAMP	P1P2	1-2	significant	AAMP_+_219134851.23-P1P2	GGTCGCGCAGAGCTGACTCT	1.0	2.0	empirical	AAMP_+_219134841.23-P1P2	AACGCCTCCCAGAGTCAGCC	2.0	1.0	empirical	AAMP_+_219134851.23-P1P2|AAMP_+_219134841.23-P1P2
KLC2	P1P2	1-2	nonessential	KLC2_-_66025303.23-P1P2	GCGGGTCCGGGTGAAGCGGG	1.0	1.0	predicted	KLC2_-_66025300.23-P1P2	GCTTCACCCGGACCCGCACC	2.0	2.0	predicted	KLC2_-_66025303.23-P1P2|KLC2_-_66025300.23-P1P2
PLEKHN1	P1P2	1-2	nonessential	PLEKHN1_+_901890.23-P1P2	GTGGCCAGAGTCGTACAGGT	1.0	1.0	predicted	PLEKHN1_+_901909.23-P1P2	TGGGGAACAGCCACTGTGTC	2.0	2.0	predicted	PLEKHN1_+_901890.23-P1P2|PLEKHN1_+_901909.23-P1P2
SON	P2	1-2	essential	SON_-_34921974.23-P2	GGACGAAATCTCATGATGAT	1.0	7.0	essential	SON_+_34922044.23-P2	ACAAGAGCATTTGGCCCATC	1.0	1.0	predicted	SON_-_34921974.23-P2|SON_+_34922044.23-P2
SASS6	P1P2	1-2	significant	SASS6_-_100598444.23-P1P2	GGGGATTAGCCTGAGAGGTC	1.0	3.0	empirical	SASS6_+_100598418.23-P1P2	TCGGGATTAGCCTGAGAGGC	2.0	1.0	empirical	SASS6_-_100598444.23-P1P2|SASS6_+_100598418.23-P1P2
CDC123	P1P2	1-2	significant	CDC123_-_12238200.23-P1P2	GGGCGCCCAGAGTTCCGGGA	1.0	1.0	empirical	CDC123_+_12238270.23-P1P2	GTTCTCCGCGTGGTACCCGC	2.0	2.0	empirical	CDC123_-_12238200.23-P1P2|CDC123_+_12238270.23-P1P2
OPA1	P1P2	1-2	significant	OPA1_+_193310990.23-P1P2	GACTTCCGCAAGAGCCTGAC	1.0	7.0	empirical	OPA1_-_193311193.23-P1P2	CAGCGGCCCGACGTAGTCGC	2.0	1.0	empirical	OPA1_+_193310990.23-P1P2|OPA1_-_193311193.23-P1P2
CCND1	P1	1-2	significant	CCND1_-_69455972.23-P1	GCAGCAGAGTCCGCACGCTC	1.0	1.0	empirical	CCND1_+_69455918.23-P1	CCAGAGGGCTGTCGGCGCAC	2.0	3.0	empirical	CCND1_-_69455972.23-P1|CCND1_+_69455918.23-P1
RBBP8	P1P2	1-2	significant	RBBP8_+_20513550.23-P1P2	GCCGACCCAGAGCTCCGGGT	1.0	8.0	empirical	RBBP8_-_20513527.23-P1P2	CCTCCGAGATTGCCTCGGGC	2.0	3.0	empirical	RBBP8_+_20513550.23-P1P2|RBBP8_-_20513527.23-P1P2
SNRNP35	P1P2	1-2	essential	SNRNP35_+_123942733.23-P1P2	GAGCTTGGGCTCCCTTCCGA	1.0	1.0	essential	SNRNP35_-_123942744.23-P1P2	TTCCGACGGAGACAGGCGAC	2.0	4.0	essential	SNRNP35_+_123942733.23-P1P2|SNRNP35_-_123942744.23-P1P2
SNRNP70	P1P2	1-2	significant	SNRNP70_-_49588721.23-P1P2	GCTGCTCCAGTCGCTATCGG	1.0	4.0	empirical	SNRNP70_+_49588915.23-P1P2	GACGGGGTGCGGGGCCGCTC	2.0	5.0	empirical	SNRNP70_-_49588721.23-P1P2|SNRNP70_+_49588915.23-P1P2
POLR3K	P1P2	1-2	significant	POLR3K_+_103606.23-P1P2	GAGTGGGAGCTGCCGGGAGT	1.0	8.0	empirical	POLR3K_-_103144.23-P1P2	GAGTTCTCCCAGGGCCTACC	2.0	3.0	empirical	POLR3K_+_103606.23-P1P2|POLR3K_-_103144.23-P1P2
SCFD1	P1P2	1-2	essential	SCFD1_-_31091597.23-P1P2	GAGCAGCCAGTATTCGGGAA	1.0	2.0	essential	SCFD1_-_31091592.23-P1P2	GAATACTGGCTGCTGCTGCC	2.0	5.0	essential	SCFD1_-_31091597.23-P1P2|SCFD1_-_31091592.23-P1P2
DPH2	P1P2	1-2	significant	DPH2_-_44435714.23-P1P2	GGGCTGAAGGGGATACTCAC	1.0	3.0	empirical	DPH2_-_44435901.23-P1P2	CGGTCTCTCGCTGCAGCGCC	2.0	8.0	empirical	DPH2_-_44435714.23-P1P2|DPH2_-_44435901.23-P1P2
EIF2S3	P1P2	1-2	significant	EIF2S3_-_24073117.23-P1P2	GAGAAGCTGGAGTGACTCTA	1.0	1.0	empirical	EIF2S3_+_24073421.23-P1P2	CTGAACGTCTGGGAAGGGGC	2.0	10.0	empirical	EIF2S3_-_24073117.23-P1P2|EIF2S3_+_24073421.23-P1P2
TUBGCP2	P1P2	1-2	essential	TUBGCP2_+_135122315.23-P1P2	GCCGGGACTGCGGTGAGTCC	1.0	2.0	essential	TUBGCP2_-_135122422.23-P1P2	GTCGGCCACCGTCCGCGAGC	2.0	1.0	essential	TUBGCP2_+_135122315.23-P1P2|TUBGCP2_-_135122422.23-P1P2
ATP6AP1	P1P2	1-2	significant	ATP6AP1_-_153657070.23-P1P2	GCATGGCGACGGCTCGAGTG	1.0	2.0	empirical	ATP6AP1_-_153657047.23-P1P2	CCATCATAGCCTCAGCCTCC	2.0	5.0	empirical	ATP6AP1_-_153657070.23-P1P2|ATP6AP1_-_153657047.23-P1P2
HIST1H2AI	ENST00000358739.3	1-2	nonessential	HIST1H2AI_+_27775962.23-ENST00000358739.3	GAAAAGGCCTATTATCTATA	1.0	1.0	predicted	HIST1H2AI_-_27775977.23-ENST00000358739.3	ATTATCTATACGGTCAAGAC	2.0	2.0	predicted	HIST1H2AI_+_27775962.23-ENST00000358739.3|HIST1H2AI_-_27775977.23-ENST00000358739.3
NOS1AP	P1P2	1-2	nonessential	NOS1AP_+_162039558.23-P1P2	GGAAGAAAAGGCGACGGTGG	1.0	1.0	predicted	NOS1AP_+_162039585.23-P1P2	GGGCGGTGCGTTCCACTGCC	2.0	2.0	predicted	NOS1AP_+_162039558.23-P1P2|NOS1AP_+_162039585.23-P1P2
SLBP	P1P2	1-2	significant	SLBP_-_1713995.23-P1P2	GGAGAGCGCAGAGTAGAGCA	1.0	1.0	empirical	SLBP_+_1713634.23-P1P2	CCTCGGCGTCTTCGGGCCTC	2.0	2.0	empirical	SLBP_-_1713995.23-P1P2|SLBP_+_1713634.23-P1P2
MRPL1	P1P2	1-2	significant	MRPL1_-_78784027.23-P1P2	GCGGCGGCCGTAAGGTGCAT	1.0	1.0	empirical	MRPL1_-_78784033.23-P1P2	CTACCCATGCACCTTACGGC	2.0	3.0	empirical	MRPL1_-_78784027.23-P1P2|MRPL1_-_78784033.23-P1P2
RBM22	P1P2	1-2	significant	RBM22_-_150080586.23-P1P2	GTAGCTGTAGCTTCCGAATT	1.0	1.0	empirical	RBM22_-_150080593.23-P1P2	CTCTCCCAATTCGGAAGCTC	2.0	2.0	empirical	RBM22_-_150080586.23-P1P2|RBM22_-_150080593.23-P1P2
GTF3C3	P1P2	1-2	significant	GTF3C3_+_197664394.23-P1P2	GCGGCGAGGTAGCTTCTGGA	1.0	2.0	empirical	GTF3C3_-_197664192.23-P1P2	TCATACCCTTAGGTGTGGGC	2.0	5.0	empirical	GTF3C3_+_197664394.23-P1P2|GTF3C3_-_197664192.23-P1P2
AHCTF1	P1P2	1-2	significant	AHCTF1_-_247095134.23-P1P2	GAGGCCTGCAGACCGCTCAG	1.0	2.0	empirical	AHCTF1_+_247094988.23-P1P2	CCACGGGCCGGGCTCACACC	2.0	9.0	empirical	AHCTF1_-_247095134.23-P1P2|AHCTF1_+_247094988.23-P1P2
RCL1	P1P2	1-2	essential	RCL1_+_4792990.23-P1P2	GGTGGTGGCGGCGACACCGA	1.0	5.0	essential	RCL1_-_4792974.23-P1P2	CCAGCAGCCCAGACGCGTCC	2.0	3.0	essential	RCL1_+_4792990.23-P1P2|RCL1_-_4792974.23-P1P2
KCMF1	P1P2	1-2	significant	KCMF1_-_85198522.23-P1P2	GCAGCGCCGGGACCCCGCGG	1.0	6.0	empirical	KCMF1_+_85198557.23-P1P2	CCGTCTGAACTAGGATGTCC	2.0	10.0	empirical	KCMF1_-_85198522.23-P1P2|KCMF1_+_85198557.23-P1P2
YARS	P1P2	1-2	significant	YARS_+_33282894.23-P1P2	GGCGGCGGCGACGGTGACCC	1.0	2.0	empirical	YARS_+_33282919.23-P1P2	GGAACTGTCACGCGAGTCCC	2.0	1.0	empirical	YARS_+_33282894.23-P1P2|YARS_+_33282919.23-P1P2
TBCD	P1P2	1-2	essential	TBCD_+_80709982.23-P1P2	GAAGCCAGGGATGAAGGATG	1.0	4.0	essential	TBCD_+_80710368.23-P1P2	GTGCGCGGTCCCGCGGGCCC	2.0	7.0	essential	TBCD_+_80709982.23-P1P2|TBCD_+_80710368.23-P1P2
TRAPPC1	P1P2	1-2	significant	TRAPPC1_+_7835084.23-P1P2	GGTGTCTGCACTACAGCGAA	1.0	1.0	empirical	TRAPPC1_-_7834858.23-P1P2	CTCGTTTGTCAGCAAGATGC	2.0	10.0	empirical	TRAPPC1_+_7835084.23-P1P2|TRAPPC1_-_7834858.23-P1P2
RPL18A	P1P2	1-2	significant	RPL18A_-_17970722.23-P1P2	GGTGAACGGCTGCGCGACAG	1.0	3.0	empirical	RPL18A_+_17970907.23-P1P2	CCTTCTCTTGTTGCACCCAC	2.0	2.0	empirical	RPL18A_-_17970722.23-P1P2|RPL18A_+_17970907.23-P1P2
DHX33	P1P2	1-2	significant	DHX33_-_5372196.23-P1P2	GGCATGTCGGGAGGGCACCG	1.0	1.0	empirical	DHX33_-_5371956.23-P1P2	ATCTTCCAAGCGCGGGGGCC	2.0	8.0	empirical	DHX33_-_5372196.23-P1P2|DHX33_-_5371956.23-P1P2
NUP205	P1P2	1-2	essential	NUP205_-_135242670.23-P1P2	GGGGCCTCCATGCGGCAGAA	1.0	6.0	essential	NUP205_-_135242651.23-P1P2	CGGGAAAGGGTGAGGCTGAC	2.0	2.0	essential	NUP205_-_135242670.23-P1P2|NUP205_-_135242651.23-P1P2
HOXC10	P1P2	1-2	nonessential	HOXC10_+_54379003.23-P1P2	GTTAAGGAGCAATACTACAG	1.0	1.0	predicted	HOXC10_+_54379000.23-P1P2	CCGCTGTAGTATTGCTCCTC	2.0	2.0	predicted	HOXC10_+_54379003.23-P1P2|HOXC10_+_54379000.23-P1P2
HSPE1	P1P2	1-2	essential	HSPE1_-_198365117.23-P1P2	GCGGACTGCGAGTCTCTTTG	1.0	4.0	essential	HSPE1_+_198365089.23-P1P2	GGGCCGGACTGCGAGTCTCC	2.0	5.0	essential	HSPE1_-_198365117.23-P1P2|HSPE1_+_198365089.23-P1P2
VPS37A	P1P2	1-2	nonessential	VPS37A_+_17104482.23-P1P2	GCGCCCAAACCGGCCAGCCA	1.0	1.0	predicted	VPS37A_+_17104492.23-P1P2	GTTTGGGCGTCTGGGCCGTC	2.0	2.0	predicted	VPS37A_+_17104482.23-P1P2|VPS37A_+_17104492.23-P1P2
SMG5	P1P2	1-2	significant	SMG5_+_156252585.23-P1P2	GAGCCGCCTCACAGCGATGG	1.0	1.0	empirical	SMG5_-_156252584.23-P1P2	AGCAGGGCCGGTGGCGGCGC	2.0	6.0	empirical	SMG5_+_156252585.23-P1P2|SMG5_-_156252584.23-P1P2
HTATSF1	P1P2	1-2	nonessential	HTATSF1_-_135579420.23-P1P2	GCGCCACGCGCCGACAATGG	1.0	1.0	predicted	HTATSF1_-_135579440.23-P1P2	TGCTCAGGCCGACGCAGCCC	2.0	2.0	predicted	HTATSF1_-_135579420.23-P1P2|HTATSF1_-_135579440.23-P1P2
RAB4A	P1P2	1-2	nonessential	RAB4A_-_229406955.23-P1P2	GGCAGCCGCTGGGAGACCGG	1.0	1.0	predicted	RAB4A_-_229406931.23-P1P2	AGCCGGACTCCAGCTCCGCC	3.0	3.0	predicted	RAB4A_-_229406955.23-P1P2|RAB4A_-_229406931.23-P1P2
STRAP	P1P2	1-2	significant	STRAP_+_16035370.23-P1P2	GTGGGGAGAAGCGGAGAACC	1.0	4.0	empirical	STRAP_+_16035493.23-P1P2	CCGGATTGCCCTTCTTTTCC	2.0	1.0	empirical	STRAP_+_16035370.23-P1P2|STRAP_+_16035493.23-P1P2
UQCRH	P1P2	1-2	nonessential	UQCRH_+_46769577.23-P1P2	GACCCTAGAGGGTAAACTGG	1.0	1.0	predicted	UQCRH_+_46769378.23-P1P2	GAACTGGGTTAGGTGCCGCC	2.0	2.0	predicted	UQCRH_+_46769577.23-P1P2|UQCRH_+_46769378.23-P1P2
TUBA1B	P1P2	1-2	significant	TUBA1B_-_49524730.23-P1P2	GCCGCGCGCGCGTCCACCCA	1.0	5.0	empirical	TUBA1B_-_49525164.23-P1P2	CGACTCTTAGCTTGTCGGGC	2.0	4.0	empirical	TUBA1B_-_49524730.23-P1P2|TUBA1B_-_49525164.23-P1P2
DCTN1	P1P2	1-2	significant	DCTN1_+_74618971.23-P1P2	GGCCGGCCCCGCAGGGTCTT	1.0	1.0	empirical	DCTN1_+_74618953.23-P1P2	CACCGACGACCGACGCCCAC	2.0	4.0	empirical	DCTN1_+_74618971.23-P1P2|DCTN1_+_74618953.23-P1P2
HS6ST1	P1P2	1-2	significant	HS6ST1_+_129076424.23-P1P2	GGCGCAGAGCGTTCTCGGCG	1.0	2.0	empirical	HS6ST1_+_129076429.23-P1P2	AGAACGCTCTGCGCCGCCCC	1.0	1.0	predicted	HS6ST1_+_129076424.23-P1P2|HS6ST1_+_129076429.23-P1P2
NDUFB10	P1P2	1-2	significant	NDUFB10_-_2009571.23-P1P2	GCTAGGCCGCGGGACCCGGA	1.0	5.0	empirical	NDUFB10_-_2009580.23-P1P2	CTACCTCCGTCCGGGTCCCC	2.0	6.0	empirical	NDUFB10_-_2009571.23-P1P2|NDUFB10_-_2009580.23-P1P2
OR7A17	ENST00000327462.2	1-2	nonessential	OR7A17_-_14992230.23-ENST00000327462.2	GTTATTTATTAACATAGACA	1.0	1.0	predicted	OR7A17_+_14992143.23-ENST00000327462.2	TGTGTCATTCTCTGGTTCCC	2.0	2.0	predicted	OR7A17_-_14992230.23-ENST00000327462.2|OR7A17_+_14992143.23-ENST00000327462.2
ZNHIT3	P1P2	1-2	significant	ZNHIT3_+_34842541.23-P1P2	GCTACATTTGAGCGACGCCA	1.0	2.0	empirical	ZNHIT3_-_34842510.23-P1P2	CGCGCCTCTCACGCAGCCGC	2.0	1.0	empirical	ZNHIT3_+_34842541.23-P1P2|ZNHIT3_-_34842510.23-P1P2
RPS28	P1P2	1-2	significant	RPS28_+_8386770.23-P1P2	GCGGAAAGGCACCGCGGAGT	1.0	8.0	empirical	RPS28_+_8386629.23-P1P2	TGATGTGACCTCTACCCTGC	2.0	1.0	empirical	RPS28_+_8386770.23-P1P2|RPS28_+_8386629.23-P1P2
U2AF1	P1P2	1-2	essential	U2AF1_+_44527641.23-P1P2	GTCGGCAGGGTCGGCGGCGT	1.0	1.0	essential	U2AF1_+_44527626.23-P1P2	TCGACACTGCTGCCGACGCC	2.0	2.0	essential	U2AF1_+_44527641.23-P1P2|U2AF1_+_44527626.23-P1P2
ACTR2	P1P2	1-2	significant	ACTR2_-_65454971.23-P1P2	GGGGGCCGGGAAGACGCAAG	1.0	1.0	empirical	ACTR2_-_65454953.23-P1P2	CTCCTTCGGCCCAACTTTTC	2.0	2.0	empirical	ACTR2_-_65454971.23-P1P2|ACTR2_-_65454953.23-P1P2
CWC25	P1P2	1-2	significant	CWC25_+_36981555.23-P1P2	GTCTAGAGCGGTGGTGAAAC	1.0	4.0	empirical	CWC25_+_36981567.23-P1P2	CTCTAGAGGTCACTTCCGGC	2.0	1.0	empirical	CWC25_+_36981555.23-P1P2|CWC25_+_36981567.23-P1P2
LSM4	P1P2	1-2	essential	LSM4_+_18433820.23-P1P2	GCCCGCCGGCACCATGGTGA	1.0	3.0	essential	LSM4_-_18433893.23-P1P2	CCGGGAGCGTGTGCAGCGGC	2.0	4.0	essential	LSM4_+_18433820.23-P1P2|LSM4_-_18433893.23-P1P2
STRIP1	P1P2	1-2	significant	STRIP1_-_110577243.23-P1P2	GTGTGCGCGAGTTAAGCTGG	1.0	3.0	empirical	STRIP1_-_110577278.23-P1P2	CCGACTGCCGGCTCCATCTC	2.0	2.0	empirical	STRIP1_-_110577243.23-P1P2|STRIP1_-_110577278.23-P1P2
PRPF38B	P1P2	1-2	significant	PRPF38B_+_109234979.23-P1P2	GCTCCACGCAGAAGGCGAGC	1.0	4.0	empirical	PRPF38B_+_109235390.23-P1P2	ATGATCCTGACCAACATCCC	2.0	6.0	empirical	PRPF38B_+_109234979.23-P1P2|PRPF38B_+_109235390.23-P1P2
NUP133	P1P2	1-2	significant	NUP133_-_229644034.23-P1P2	GACTAGGACAGCGAGGGATC	1.0	4.0	empirical	NUP133_-_229644064.23-P1P2	CGCGCAGGCCAGGCTGCAAC	2.0	2.0	empirical	NUP133_-_229644034.23-P1P2|NUP133_-_229644064.23-P1P2
TOMM40	P1P2	1-2	nonessential	TOMM40_-_45394587.23-P1P2	GCGCCAGTGAGAACCGGGGC	1.0	1.0	predicted	TOMM40_-_45394995.23-P1P2	CCGAGATCCAGGCCATCGCC	2.0	2.0	predicted	TOMM40_-_45394587.23-P1P2|TOMM40_-_45394995.23-P1P2
PSMB2	P1P2	1-2	essential	PSMB2_-_36107100.23-P1P2	GGCCCGCTTCCAGGTCTCAC	1.0	1.0	essential	PSMB2_+_36107087.23-P1P2	GGTCTCACCGGTGAGACAGC	2.0	4.0	essential	PSMB2_-_36107100.23-P1P2|PSMB2_+_36107087.23-P1P2
ELP6	P1P2	1-2	nonessential	ELP6_+_47555158.23-P1P2	GTTGCGCGAGCCGGGCTGTC	1.0	1.0	predicted	ELP6_-_47554896.23-P1P2	CAGAGGATCGACCCGGGGAC	2.0	2.0	predicted	ELP6_+_47555158.23-P1P2|ELP6_-_47554896.23-P1P2
SYF2	P1P2	1-2	significant	SYF2_-_25558938.23-P1P2	GCGGTGGGTGGAACTCACCT	1.0	2.0	empirical	SYF2_+_25558954.23-P1P2	TCACAACCTTTCTCTCTTCC	2.0	1.0	empirical	SYF2_-_25558938.23-P1P2|SYF2_+_25558954.23-P1P2
OR7A10	ENST00000248058.1	1-2	nonessential	OR7A10_+_14952616.23-ENST00000248058.1	GTCAGAGGAACCAGAATTGC	1.0	1.0	predicted	OR7A10_+_14952334.23-ENST00000248058.1	TCACGGTCAGAAGGAAGTTC	2.0	2.0	predicted	OR7A10_+_14952616.23-ENST00000248058.1|OR7A10_+_14952334.23-ENST00000248058.1
FNTA	P1P2	1-2	significant	FNTA_-_42911755.23-P1P2	GCCAGCGGCCCCAAGACCCG	1.0	3.0	empirical	FNTA_-_42911495.23-P1P2	CCATCTCGCCTCGGTCCGCC	2.0	4.0	empirical	FNTA_-_42911755.23-P1P2|FNTA_-_42911495.23-P1P2
SETDB1	P1P2	1-2	significant	SETDB1_+_150898858.23-P1P2	GAGGGGAGGAAGCGTGAAAG	1.0	7.0	empirical	SETDB1_-_150898815.23-P1P2	TTCCGGTCACCGCGACGGTC	2.0	3.0	empirical	SETDB1_+_150898858.23-P1P2|SETDB1_-_150898815.23-P1P2
DNM2	P1P2	1-2	significant	DNM2_-_10828821.23-P1P2	GGTCTTGCCGAGGCCCGGGC	1.0	5.0	empirical	DNM2_+_10828788.23-P1P2	GGAGCGGGCGTCTTGCCGAC	2.0	4.0	empirical	DNM2_-_10828821.23-P1P2|DNM2_+_10828788.23-P1P2
EPRS	P1P2	1-2	significant	EPRS_-_220219801.23-P1P2	GCTACGGAGGACCCCGCGAA	1.0	3.0	empirical	EPRS_-_220219785.23-P1P2	TAGTTCTGGCACGAGCCAGC	2.0	1.0	empirical	EPRS_-_220219801.23-P1P2|EPRS_-_220219785.23-P1P2
RBM48	P1P2	1-2	nonessential	RBM48_+_92158174.23-P1P2	GTGTGTCGCATACCGCCCTC	1.0	1.0	predicted	RBM48_-_92158122.23-P1P2	ACTTTGATCCTCGCAGGGAC	2.0	2.0	predicted	RBM48_+_92158174.23-P1P2|RBM48_-_92158122.23-P1P2
COG4	P1P2	1-2	significant	COG4_+_70557377.23-P1P2	GGGTGCAGCAGCCGTCTGAG	1.0	4.0	empirical	COG4_+_70557397.23-P1P2	CTGACAGCTTCGGAGGCGAC	2.0	1.0	empirical	COG4_+_70557377.23-P1P2|COG4_+_70557397.23-P1P2
RPL32	P1P2	1-2	significant	RPL32_-_12882840.23-P1P2	GACGCAAAGCCCTATCAACT	1.0	1.0	empirical	RPL32_-_12883061.23-P1P2	TTGCGCGCCACCGTCCCTTC	2.0	2.0	empirical	RPL32_-_12882840.23-P1P2|RPL32_-_12883061.23-P1P2
SLMO2	P1P2	1-2	essential	SLMO2_-_57617833.23-P1P2	GGTAGCGCCAGGGGACAACG	1.0	2.0	essential	SLMO2_-_57617811.23-P1P2	GACATCTCTCAGGGTGCCGC	2.0	4.0	essential	SLMO2_-_57617833.23-P1P2|SLMO2_-_57617811.23-P1P2
RBM19	P1P2	1-2	significant	RBM19_+_114404081.23-P1P2	GGCGGTAGCGTGAAACTTGG	1.0	1.0	empirical	RBM19_+_114404111.23-P1P2	CCATCTTTACCGAGCCGGAC	2.0	2.0	empirical	RBM19_+_114404081.23-P1P2|RBM19_+_114404111.23-P1P2
MANF	P1P2	1-2	significant	MANF_-_51422730.23-P1P2	GCGGGTGCGGTTCAGTCGGT	1.0	2.0	empirical	MANF_-_51422736.23-P1P2	CCGCCGACCGACTGAACCGC	2.0	3.0	empirical	MANF_-_51422730.23-P1P2|MANF_-_51422736.23-P1P2
MOG	P1P2	1-2	nonessential	MOG_-_29624930.23-P1P2	GAAGGGGACATGCACCCCAA	1.0	1.0	predicted	MOG_+_29624931.23-P1P2	CCACTTGGCCTGACCTTGCC	2.0	2.0	predicted	MOG_-_29624930.23-P1P2|MOG_+_29624931.23-P1P2
DONSON	P1P2	1-2	essential	DONSON_+_34960976.23-P1P2	GCGCGCGGGAAGTCTCTGTA	1.0	2.0	essential	DONSON_+_34960973.23-P1P2	CCCTACAGAGACTTCCCGCC	2.0	5.0	essential	DONSON_+_34960976.23-P1P2|DONSON_+_34960973.23-P1P2
TMA16	P1P2	1-2	significant	TMA16_+_164416208.23-P1P2	GTAGTGACTAGCGAGAAGTT	1.0	5.0	empirical	TMA16_+_164416318.23-P1P2	CTCTGGCCTGGGTAGACTCC	2.0	4.0	empirical	TMA16_+_164416208.23-P1P2|TMA16_+_164416318.23-P1P2
RAC3	P1P2	1-2	nonessential	RAC3_+_79989590.23-P1P2	GGCGGCCGCGAGCCGAGCTG	1.0	1.0	predicted	RAC3_+_79989567.23-P1P2	CTGCGGCGCCGGGCATTTCC	2.0	2.0	predicted	RAC3_+_79989590.23-P1P2|RAC3_+_79989567.23-P1P2
SERBP1	P1P2	1-2	significant	SERBP1_-_67896013.23-P1P2	GTCGGCGGCGCGTTCCTCCA	1.0	1.0	empirical	SERBP1_+_67895645.23-P1P2	CCACATTCTGCCCCTGCTTC	2.0	4.0	empirical	SERBP1_-_67896013.23-P1P2|SERBP1_+_67895645.23-P1P2
DDX24	P1P2	1-2	essential	DDX24_+_94547517.23-P1P2	GTGCAGCTGAGGTACAGCGG	1.0	3.0	essential	DDX24_+_94547508.23-P1P2	CAGAAACCGCCGCTGTACCC	2.0	2.0	essential	DDX24_+_94547517.23-P1P2|DDX24_+_94547508.23-P1P2
SNRNP40	P1P2	1-2	significant	SNRNP40_+_31769624.23-P1P2	GAGAGCGGCAGCGCGGTCAG	1.0	3.0	empirical	SNRNP40_+_31769621.23-P1P2	CCACTGACCGCGCTGCCGCC	2.0	2.0	empirical	SNRNP40_+_31769624.23-P1P2|SNRNP40_+_31769621.23-P1P2
RPL35A	P1P2	1-2	essential	RPL35A_+_197677288.23-P1P2	GAATTTAACTGGGATAACCC	1.0	4.0	essential	RPL35A_-_197677180.23-P1P2	ATACGCACCGGCGACTCGCC	2.0	1.0	essential	RPL35A_+_197677288.23-P1P2|RPL35A_-_197677180.23-P1P2
GAK	P1P2	1-2	significant	GAK_-_926017.23-P1P2	GCGCGGCAGCCGGAGTGGTC	1.0	5.0	empirical	GAK_+_926096.23-P1P2	TGACGTAGGCGCCCGTGAGC	2.0	6.0	empirical	GAK_-_926017.23-P1P2|GAK_+_926096.23-P1P2
PDPK1	P1P2	1-2	significant	PDPK1_-_2588046.23-P1P2	GCTGGGGCTCCGCTTCGGGG	1.0	2.0	empirical	PDPK1_-_2588030.23-P1P2	CAGCAATGGCCGCCCTCATC	2.0	1.0	empirical	PDPK1_-_2588046.23-P1P2|PDPK1_-_2588030.23-P1P2
RPL12	P1P2	1-2	significant	RPL12_-_130213255.23-P1P2	GGCAGCTCCGAAACTCACAC	1.0	8.0	empirical	RPL12_+_130213322.23-P1P2	TACCCTAGGGCGTGCGGGCC	2.0	8.0	empirical	RPL12_-_130213255.23-P1P2|RPL12_+_130213322.23-P1P2
NVL	P1P2	1-2	essential	NVL_+_224517846.23-P1P2	GGAGCTGGCGGTCCGAGCTG	1.0	1.0	essential	NVL_+_224517861.23-P1P2	GCTCCTAGTCAACCGGGGGC	2.0	2.0	essential	NVL_+_224517846.23-P1P2|NVL_+_224517861.23-P1P2
FBL	P1P2	1-2	essential	FBL_+_40336946.23-P1P2	GTCCGGAGCCGCACAAACCA	1.0	2.0	essential	FBL_-_40336975.23-P1P2	CGGACTCCGGAGCCGCACAC	2.0	3.0	essential	FBL_+_40336946.23-P1P2|FBL_-_40336975.23-P1P2
PXN	P1P2	1-2	significant	PXN_-_120703482.23-P1P2	GGCGCTAGCTGCCCGTCCCG	1.0	3.0	empirical	PXN_+_120703483.23-P1P2	CTCGTCTATGCCCCGCAACC	2.0	4.0	empirical	PXN_-_120703482.23-P1P2|PXN_+_120703483.23-P1P2
NARS	P1P2	1-2	essential	NARS_+_55288999.23-P1P2	GGCACGTTGGAGTCATAAGA	1.0	2.0	essential	NARS_+_55288993.23-P1P2	ACGCCGTCTTATGACTCCAC	2.0	9.0	essential	NARS_+_55288999.23-P1P2|NARS_+_55288993.23-P1P2
RPLP0	P1P2	1-2	essential	RPLP0_-_120638895.23-P1P2	GAGCACACGAACCTTCCACG	1.0	9.0	essential	RPLP0_-_120638701.23-P1P2	CTTAGGCCCGGGACCGCGGC	2.0	6.0	essential	RPLP0_-_120638895.23-P1P2|RPLP0_-_120638701.23-P1P2
CHMP2A	P1P2	1-2	essential	CHMP2A_-_59066282.23-P1P2	GAGCGAGGCACCGGACACCC	1.0	1.0	essential	CHMP2A_+_59066434.23-P1P2	CTCGGTCCTGTCGCCGCCGC	2.0	3.0	essential	CHMP2A_-_59066282.23-P1P2|CHMP2A_+_59066434.23-P1P2
PSMA5	P1P2	1-2	essential	PSMA5_+_109968996.23-P1P2	GGGTGCCGGTGGAGTCGTGT	1.0	1.0	essential	PSMA5_-_109969028.23-P1P2	GTGAGTTGGGTGCCGGTGGC	2.0	3.0	essential	PSMA5_+_109968996.23-P1P2|PSMA5_-_109969028.23-P1P2
POLA2	P1P2	1-2	significant	POLA2_-_65029495.23-P1P2	GGAAGCAGGACGTTCTCACC	1.0	1.0	empirical	POLA2_-_65029809.23-P1P2	AAGATCTGCAGCTCCTCCGC	2.0	9.0	empirical	POLA2_-_65029495.23-P1P2|POLA2_-_65029809.23-P1P2
TRPM7	P1P2	1-2	essential	TRPM7_+_50978930.23-P1P2	GCCTGTGGCCAGTCACCCGG	1.0	3.0	essential	TRPM7_-_50978936.23-P1P2	GAGGAGTTGGTCGCACAATC	2.0	6.0	essential	TRPM7_+_50978930.23-P1P2|TRPM7_-_50978936.23-P1P2
NUP160	P1P2	1-2	essential	NUP160_+_47869833.23-P1P2	GGCCCTGGAACGGAGCTTCG	1.0	2.0	essential	NUP160_-_47869693.23-P1P2	TGTTTCATCCTCCTGAGTCC	2.0	7.0	essential	NUP160_+_47869833.23-P1P2|NUP160_-_47869693.23-P1P2
RPS12	P1P2	1-2	significant	RPS12_-_133135705.23-P1P2	GACCGGCATGCGTGCGGATG	1.0	6.0	empirical	RPS12_-_133135766.23-P1P2	CGCTCAACTTACCCCAAGCC	2.0	1.0	empirical	RPS12_-_133135705.23-P1P2|RPS12_-_133135766.23-P1P2
NUP98	P1P2	1-2	essential	NUP98_+_3818746.23-P1P2	GCGCGCTGCGCCCGAAGCGG	1.0	1.0	essential	NUP98_-_3818519.23-P1P2	CTGCGCGCACCTTCTGGCCC	2.0	10.0	essential	NUP98_+_3818746.23-P1P2|NUP98_-_3818519.23-P1P2
PFDN2	P1P2	1-2	essential	PFDN2_+_161087799.23-P1P2	GCGAAGATGGCGGAGAACAG	1.0	1.0	essential	PFDN2_+_161087778.23-P1P2	CTGCTCTTGCCGGCGCGACC	2.0	3.0	essential	PFDN2_+_161087799.23-P1P2|PFDN2_+_161087778.23-P1P2
CD8B	P1P2	1-2	nonessential	CD8B_-_87088921.23-P1P2	GCCCGGGAGCGCAGACCCTT	1.0	1.0	predicted	CD8B_+_87088914.23-P1P2	TTGGGTAGCCCGCGCGCCGC	2.0	2.0	predicted	CD8B_-_87088921.23-P1P2|CD8B_+_87088914.23-P1P2
BRCA1	P1P2	1-2	significant	BRCA1_-_41277370.23-P1P2	GCACAGCCTGTCCCCCGTCC	1.0	3.0	empirical	BRCA1_-_41277311.23-P1P2	TCACCCTCTGCTCTGGGTAC	2.0	6.0	empirical	BRCA1_-_41277370.23-P1P2|BRCA1_-_41277311.23-P1P2
TOE1	P1P2	1-2	significant	TOE1_-_45805871.23-P1P2	GCCTGAACCGCGCCAGGAGA	1.0	5.0	empirical	TOE1_+_45805889.23-P1P2	ACAGACGACTCAGGCGGGAC	2.0	4.0	empirical	TOE1_-_45805871.23-P1P2|TOE1_+_45805889.23-P1P2
MCM2	P1P2	1-2	essential	MCM2_-_127317301.23-P1P2	GGTAGTGGCGGAGAGGATCG	1.0	3.0	essential	MCM2_-_127317312.23-P1P2	TAGCAGTACCACGATCCTCC	2.0	4.0	essential	MCM2_-_127317301.23-P1P2|MCM2_-_127317312.23-P1P2
ACOT12	P1P2	1-2	nonessential	ACOT12_-_80689897.23-P1P2	GGTGCGCCGGCTGGATGGCT	1.0	1.0	predicted	ACOT12_+_80689672.23-P1P2	CTATCCCTGGCTGCGCAGGC	2.0	2.0	predicted	ACOT12_-_80689897.23-P1P2|ACOT12_+_80689672.23-P1P2
PHB	P1P2	1-2	essential	PHB_+_47492183.23-P1P2	GTGGAAGCAGGTGAGAATGG	1.0	3.0	essential	PHB_+_47492231.23-P1P2	CACATACTGCGCATGAGCTC	2.0	4.0	essential	PHB_+_47492183.23-P1P2|PHB_+_47492231.23-P1P2
RNF168	P1P2	1-2	nonessential	RNF168_+_196230575.23-P1P2	GCTGGCTGCGTAGGAGGGAC	1.0	1.0	predicted	RNF168_+_196230600.23-P1P2	TATTCGTTGCGGCAGCGCAC	2.0	2.0	predicted	RNF168_+_196230575.23-P1P2|RNF168_+_196230600.23-P1P2
MCM10	P1P2	1-2	essential	MCM10_-_13203599.23-P1P2	GGTGAACGAAGAAGGCGTCC	1.0	3.0	essential	MCM10_-_13203591.23-P1P2	TCTTCGTTCACAGCTGAACC	2.0	8.0	essential	MCM10_-_13203599.23-P1P2|MCM10_-_13203591.23-P1P2
DDX10	P1P2	1-2	significant	DDX10_+_108535803.23-P1P2	GAGACTCACGGAACCAGCAT	1.0	1.0	empirical	DDX10_-_108536148.23-P1P2	CCACTCTGCAACTCCTCGCC	2.0	4.0	empirical	DDX10_+_108535803.23-P1P2|DDX10_-_108536148.23-P1P2
CFL1	P1P2	1-2	significant	CFL1_+_65625628.23-P1P2	GTTCAGTCGGGTCCCGGCAG	1.0	1.0	empirical	CFL1_-_65625654.23-P1P2	CGTTCAGTCGGGTCCCGGCC	2.0	3.0	empirical	CFL1_+_65625628.23-P1P2|CFL1_-_65625654.23-P1P2
TERF1	P1P2	1-2	nonessential	TERF1_-_73921127.23-P1P2	GAGCGAGCCATTTAACATGG	1.0	1.0	predicted	TERF1_-_73921145.23-P1P2	CTGAGGAAACATCCTCCGCC	2.0	2.0	predicted	TERF1_-_73921127.23-P1P2|TERF1_-_73921145.23-P1P2
POLR3A	P1P2	1-2	essential	POLR3A_-_79789274.23-P1P2	GCTCGCCGCTAACACATCTG	1.0	4.0	essential	POLR3A_+_79789257.23-P1P2	CTAACACATCTGCGGCATCC	2.0	1.0	essential	POLR3A_-_79789274.23-P1P2|POLR3A_+_79789257.23-P1P2
RPS6	P1P2	1-2	essential	RPS6_+_19380221.23-P1P2	GAAGTTGGCCCTCTTTTCCG	1.0	1.0	essential	RPS6_+_19380173.23-P1P2	CCATCACCTACCTTCATCTC	2.0	3.0	essential	RPS6_+_19380221.23-P1P2|RPS6_+_19380173.23-P1P2
COQ4	P1P2	1-2	significant	COQ4_-_131085196.23-P1P2	GCGGGCTCCCGGGCCTACAG	1.0	6.0	empirical	COQ4_+_131085154.23-P1P2	TGTCCTCCGTCGGCTCTGCC	2.0	1.0	empirical	COQ4_-_131085196.23-P1P2|COQ4_+_131085154.23-P1P2
C9orf78	P1P2	1-2	nonessential	C9orf78_-_132597510.23-P1P2	GACGACCGGCATGGTGACAA	1.0	1.0	predicted	C9orf78_+_132597511.23-P1P2	AGTTGTACAGCCGCCGCGCC	2.0	2.0	predicted	C9orf78_-_132597510.23-P1P2|C9orf78_+_132597511.23-P1P2
CDC16	P1P2	1-2	essential	CDC16_-_115000772.23-P1P2	GGTCTCCGCCTCGCCCAGAA	1.0	9.0	essential	CDC16_+_115000554.23-P1P2	CCATGAACCTAGAGCGGCTC	2.0	1.0	essential	CDC16_-_115000772.23-P1P2|CDC16_+_115000554.23-P1P2
MRGBP	P1P2	1-2	significant	MRGBP_-_61427884.23-P1P2	GCGGGCCGCGGCCATGGGAG	1.0	4.0	empirical	MRGBP_-_61427962.23-P1P2	CTGTCTCCTCCGCCGGGCTC	2.0	5.0	empirical	MRGBP_-_61427884.23-P1P2|MRGBP_-_61427962.23-P1P2
TREML2	P1P2	1-2	nonessential	TREML2_+_41168862.23-P1P2	GCTGCCTCACTTCCCTAAAT	1.0	1.0	predicted	TREML2_-_41168880.23-P1P2	CACTTCCCTAAATGGGCAGC	2.0	2.0	predicted	TREML2_+_41168862.23-P1P2|TREML2_-_41168880.23-P1P2
NUP155	P1P2	1-2	significant	NUP155_+_37371164.23-P1P2	GTTGGCGCGCGCGCCCTAGG	1.0	3.0	empirical	NUP155_-_37370958.23-P1P2	GACCTTTCCGAGCTGCTTAC	2.0	6.0	empirical	NUP155_+_37371164.23-P1P2|NUP155_-_37370958.23-P1P2
EXOC7	P1P2	1-2	significant	EXOC7_-_74099399.23-P1P2	GGTCGCAAGGCTCTCCCCCA	1.0	8.0	empirical	EXOC7_+_74099798.23-P1P2	CAGTATCTTTCCTCCGCGGC	2.0	1.0	empirical	EXOC7_-_74099399.23-P1P2|EXOC7_+_74099798.23-P1P2
CNOT2	P1P2	1-2	significant	CNOT2_-_70637260.23-P1P2	GCGGGACAAGAAAATTCATG	1.0	7.0	empirical	CNOT2_+_70637651.23-P1P2	CCGCGCTGCTTCCTGGGGGC	2.0	8.0	empirical	CNOT2_-_70637260.23-P1P2|CNOT2_+_70637651.23-P1P2
UBA3	P1P2	1-2	essential	UBA3_+_69129471.23-P1P2	GCGAGGAGCCGTAAGTACCG	1.0	1.0	essential	UBA3_-_69129485.23-P1P2	TAAGTACCGGGGCTCTGCAC	2.0	3.0	essential	UBA3_+_69129471.23-P1P2|UBA3_-_69129485.23-P1P2
MAK16	P1P2	1-2	essential	MAK16_+_33342747.23-P1P2	GCGGGTGTAAGAACAACCGG	1.0	2.0	essential	MAK16_-_33342733.23-P1P2	ACTGCATGGTGTCCGCGGCC	2.0	6.0	essential	MAK16_+_33342747.23-P1P2|MAK16_-_33342733.23-P1P2
MAT2A	P1P2	1-2	significant	MAT2A_+_85766276.23-P1P2	GGAGCGAACGAAGCAGCGGG	1.0	3.0	empirical	MAT2A_+_85766280.23-P1P2	CTGCTTCGTTCGCTCCGCGC	2.0	1.0	empirical	MAT2A_+_85766276.23-P1P2|MAT2A_+_85766280.23-P1P2
F8A1	P1P2	1-2	nonessential	F8A1_-_154114513.23-P1P2	GCGCTCTTTGCACCTCATCA	1.0	1.0	predicted	F8A1_+_154114503.23-P1P2	CATCAGGGCAAGGGGCAGGC	2.0	2.0	predicted	F8A1_-_154114513.23-P1P2|F8A1_+_154114503.23-P1P2
WDR75	P1P2	1-2	essential	WDR75_-_190306224.23-P1P2	GCGCTACTGCGCAAAGATGG	1.0	4.0	essential	WDR75_-_190306258.23-P1P2	CCACAACGAACCACGCGGAC	2.0	6.0	essential	WDR75_-_190306224.23-P1P2|WDR75_-_190306258.23-P1P2
EP400	P1P2	1-2	essential	EP400_+_132434542.23-P1P2	GCGCTCCGGCCGCGTCAGGA	1.0	3.0	essential	EP400_-_132434629.23-P1P2	TCCCGAGAGCCTCCCGCCCC	2.0	10.0	essential	EP400_+_132434542.23-P1P2|EP400_-_132434629.23-P1P2
HMGN2	P1P2	1-2	nonessential	HMGN2_-_26799202.23-P1P2	GTGGTGCAGGGAGCGAGAAT	1.0	1.0	predicted	HMGN2_-_26798921.23-P1P2	CCGTTCATTGGCCCAGCTGC	2.0	2.0	predicted	HMGN2_-_26799202.23-P1P2|HMGN2_-_26798921.23-P1P2
TXNL4B	P1P2	1-2	significant	TXNL4B_-_72127489.23-P1P2	GAAAAGAAACTCCTGGCCGT	1.0	7.0	empirical	TXNL4B_+_72127483.23-P1P2	TCGGTCGGCCCCCGCTCAAC	2.0	3.0	empirical	TXNL4B_-_72127489.23-P1P2|TXNL4B_+_72127483.23-P1P2
DHX36	P1P2	1-2	significant	DHX36_+_154042223.23-P1P2	GAGCGGTTGCTGGTTCTGAC	1.0	2.0	empirical	DHX36_+_154042240.23-P1P2	CTGGAAATGGCGTCCGGGCC	2.0	1.0	empirical	DHX36_+_154042223.23-P1P2|DHX36_+_154042240.23-P1P2
ZRANB2	P1P2	1-2	significant	ZRANB2_-_71546722.23-P1P2	GCCCGCAGCTATGTCTTCAC	1.0	1.0	empirical	ZRANB2_-_71546527.23-P1P2	TAAGACGGGTTGAGGCGGCC	2.0	2.0	empirical	ZRANB2_-_71546722.23-P1P2|ZRANB2_-_71546527.23-P1P2
MRPL34	P1P2	1-2	essential	MRPL34_-_17416686.23-P1P2	GTCGCCCGCAGCCGGTACTG	1.0	4.0	essential	MRPL34_+_17416659.23-P1P2	GAATCGCCCGCAGCCGGTAC	2.0	1.0	essential	MRPL34_-_17416686.23-P1P2|MRPL34_+_17416659.23-P1P2
ZNF407	ENST00000299687.5	1-2	nonessential	ZNF407_-_72343011.23-ENST00000299687.5	GAATAAACCCGAAAATGATG	1.0	1.0	predicted	ZNF407_+_72343057.23-ENST00000299687.5	ATAATGAAGACGGTGGGCCC	2.0	2.0	predicted	ZNF407_-_72343011.23-ENST00000299687.5|ZNF407_+_72343057.23-ENST00000299687.5
WDR7	P1P2	1-2	significant	WDR7_-_54318645.23-P1P2	GGGCACCTTGCAGTATCACT	1.0	4.0	empirical	WDR7_+_54318670.23-P1P2	CCCCACGGATTATCCCAGCC	2.0	4.0	empirical	WDR7_-_54318645.23-P1P2|WDR7_+_54318670.23-P1P2
MASTL	P1P2	1-2	significant	MASTL_-_27444320.23-P1P2	GGGAGTGGCTGCTCGCGGAG	1.0	1.0	empirical	MASTL_-_27444305.23-P1P2	CTCCCGCCAACTGGGTTCAC	2.0	5.0	empirical	MASTL_-_27444320.23-P1P2|MASTL_-_27444305.23-P1P2
DDX11	P1P2	1-2	nonessential	DDX11_+_31226729.23-P1P2	GGCAGCAGCGAGAATCTACA	1.0	1.0	predicted	DDX11_+_31226823.23-P1P2	CCAGTTTCTAACTCAGTGGC	2.0	2.0	predicted	DDX11_+_31226729.23-P1P2|DDX11_+_31226823.23-P1P2
BGLAP	P1P2	1-2	essential	BGLAP_+_156183115.23-P1P2	GGTGAATACCCTGACTCCTA	1.0	10.0	essential	BGLAP_-_156182840.23-P1P2	CTGCCTAGATTGGCGCTACC	2.0	2.0	essential	BGLAP_+_156183115.23-P1P2|BGLAP_-_156182840.23-P1P2
IPO7	P1P2	1-2	significant	IPO7_-_9406180.23-P1P2	GGGCGAAGAGGTTCTATCCG	1.0	8.0	empirical	IPO7_-_9406168.23-P1P2	CTTCGCCTCGGCGTGGAGGC	2.0	1.0	empirical	IPO7_-_9406180.23-P1P2|IPO7_-_9406168.23-P1P2
SACM1L	P1P2	1-2	significant	SACM1L_-_45730905.23-P1P2	GGGTAGAGTTGTAGCCGAGG	1.0	3.0	empirical	SACM1L_-_45730829.23-P1P2	CGCAGGAGAGCCGGCCTGAC	2.0	1.0	empirical	SACM1L_-_45730905.23-P1P2|SACM1L_-_45730829.23-P1P2
XRCC5	P1P2	1-2	essential	XRCC5_-_216974154.23-P1P2	GGACCAAAGCGCCTGAGGAC	1.0	3.0	essential	XRCC5_+_216974143.23-P1P2	GAGGACCGGCAACATGGTGC	2.0	2.0	essential	XRCC5_-_216974154.23-P1P2|XRCC5_+_216974143.23-P1P2
MRPS11	P1P2	1-2	essential	MRPS11_-_89010986.23-P1P2	GCGCGGGGTCGCGGTTCCTG	1.0	4.0	essential	MRPS11_-_89010934.23-P1P2	AGTCAGTTTCCGTCTGCAGC	2.0	1.0	essential	MRPS11_-_89010986.23-P1P2|MRPS11_-_89010934.23-P1P2
VPS18	P1P2	1-2	significant	VPS18_-_41186699.23-P1P2	GTCACCTGGCACCGGCTGAA	1.0	2.0	empirical	VPS18_-_41187068.23-P1P2	CTTCCTTACCCGAGTGGGGC	2.0	8.0	empirical	VPS18_-_41186699.23-P1P2|VPS18_-_41187068.23-P1P2
SDHC	P1P2	1-2	significant	SDHC_+_161284139.23-P1P2	GCGGCCCCGCCACCCGAGGG	1.0	2.0	empirical	SDHC_-_161284228.23-P1P2	ACTGAAGTCACCTCAGCAAC	2.0	1.0	empirical	SDHC_+_161284139.23-P1P2|SDHC_-_161284228.23-P1P2
MCM4	P1P2	1-2	essential	MCM4_-_48873574.23-P1P2	GGCAAGCGGCCGCCTTTCCA	1.0	2.0	essential	MCM4_+_48873564.23-P1P2	TTCCACGGTAACCGCGCGCC	2.0	1.0	essential	MCM4_-_48873574.23-P1P2|MCM4_+_48873564.23-P1P2
MAU2	P1P2	1-2	significant	MAU2_-_19431643.23-P1P2	GTGCTTCCGCCTCCCTGTGG	1.0	10.0	empirical	MAU2_+_19431630.23-P1P2	CCCTGTGGCGGCGGCTTGTC	2.0	6.0	empirical	MAU2_-_19431643.23-P1P2|MAU2_+_19431630.23-P1P2
COG3	P1P2	1-2	essential	COG3_+_46039129.23-P1P2	GTCAGCAGCAGCGAGATGGA	1.0	5.0	essential	COG3_-_46039318.23-P1P2	CCGCCTTCAGCTCCAATACC	2.0	2.0	essential	COG3_+_46039129.23-P1P2|COG3_-_46039318.23-P1P2
TOR2A	P1P2	1-2	nonessential	TOR2A_+_130497545.23-P1P2	GAGCTCGGGCCTCACCCGGA	1.0	1.0	predicted	TOR2A_-_130497575.23-P1P2	ACAACGAGCTCGGGCCTCAC	2.0	2.0	predicted	TOR2A_+_130497545.23-P1P2|TOR2A_-_130497575.23-P1P2
DR1	P1P2	1-2	significant	DR1_+_93811837.23-P1P2	GCCCAACGGCGTCGGAGCAG	1.0	10.0	empirical	DR1_-_93811723.23-P1P2	CCTCGGCCAAACCATCCTTC	2.0	1.0	empirical	DR1_+_93811837.23-P1P2|DR1_-_93811723.23-P1P2
CTPS1	P1P2	1-2	significant	CTPS1_-_41445838.23-P1P2	GTCAGCTCGGCCGGGCTCGT	1.0	10.0	empirical	CTPS1_+_41445384.23-P1P2	CCGTGAAAGACTGCCGGGCC	2.0	2.0	empirical	CTPS1_-_41445838.23-P1P2|CTPS1_+_41445384.23-P1P2
TUBA3D	ENST00000321253.6	1-2	nonessential	TUBA3D_-_132233780.23-ENST00000321253.6	GAGCGGAGTTCGCCATGGTA	1.0	1.0	predicted	TUBA3D_+_132233982.23-ENST00000321253.6	GCCTTTAGTGAACGGGACCC	2.0	2.0	predicted	TUBA3D_-_132233780.23-ENST00000321253.6|TUBA3D_+_132233982.23-ENST00000321253.6
POLR2L	P1P2	1-2	significant	POLR2L_-_842512.23-P1P2	GCGTACAGGGATGATCATGG	1.0	1.0	empirical	POLR2L_-_842509.23-P1P2	TGATCATCCCTGTACGCTGC	2.0	3.0	empirical	POLR2L_-_842512.23-P1P2|POLR2L_-_842509.23-P1P2
MRPL14	P1P2	1-2	significant	MRPL14_+_44095129.23-P1P2	GAGGCCGCGTGGGGCGAAGG	1.0	3.0	empirical	MRPL14_+_44095138.23-P1P2	CACGCGGCCTCTTCCTAGCC	2.0	1.0	empirical	MRPL14_+_44095129.23-P1P2|MRPL14_+_44095138.23-P1P2
SS18L2	P1P2	1-2	significant	SS18L2_-_42632410.23-P1P2	GATGTCGGTGGCCTTCGTAC	1.0	5.0	empirical	SS18L2_-_42632379.23-P1P2	CCGGAACCACGACCGCCAAC	1.0	1.0	predicted	SS18L2_-_42632410.23-P1P2|SS18L2_-_42632379.23-P1P2
NOL11	P1P2	1-2	essential	NOL11_-_65714041.23-P1P2	GGGCCTGCCGGGAGTGAGCG	1.0	1.0	essential	NOL11_-_65714052.23-P1P2	AAGTACGGCCGCGCTCACTC	2.0	2.0	essential	NOL11_-_65714041.23-P1P2|NOL11_-_65714052.23-P1P2
MAX	P1P2	1-2	significant	MAX_+_65569008.23-P1P2	GGAGAGCGACGTGAGTCCTG	1.0	3.0	empirical	MAX_-_65568906.23-P1P2	CTCGGGGCCAGGAGTGCCTC	2.0	7.0	empirical	MAX_+_65569008.23-P1P2|MAX_-_65568906.23-P1P2
MED10	P1P2	1-2	significant	MED10_-_6378270.23-P1P2	GAAAGGGGCCTCAAAGAGGT	1.0	8.0	empirical	MED10_-_6378376.23-P1P2	CTACTCGTGCCCCGCCAGCC	2.0	8.0	empirical	MED10_-_6378270.23-P1P2|MED10_-_6378376.23-P1P2
HNRNPK	P1P2	1-2	significant	HNRNPK_+_86595098.23-P1P2	GTAGCTCCGACCGGCTGAGG	1.0	3.0	empirical	HNRNPK_-_86594674.23-P1P2	CGATGGCTTTGTCTCGGGCC	2.0	7.0	empirical	HNRNPK_+_86595098.23-P1P2|HNRNPK_-_86594674.23-P1P2
GLRX3	P1P2	1-2	significant	GLRX3_-_131934733.23-P1P2	GTAGCGGCCGTGGAGGAGGT	1.0	1.0	empirical	GLRX3_-_131934729.23-P1P2	CCTCCACGGCCGCTACAGCC	2.0	5.0	empirical	GLRX3_-_131934733.23-P1P2|GLRX3_-_131934729.23-P1P2
HIRA	P1	1-2	significant	HIRA_+_19435207.23-P1	GCGCGCCGGTCGCCCAGACA	1.0	1.0	predicted	HIRA_-_19435159.23-P1	CCGGGGTCTTCCGGAGGGAC	2.0	2.0	predicted	HIRA_+_19435207.23-P1|HIRA_-_19435159.23-P1
SMARCB1	P1	1-2	significant	SMARCB1_+_24129228.23-P1	GTGCGGACCGGGCCGGGTAC	1.0	6.0	empirical	SMARCB1_-_24129238.23-P1	GGTACTGGCGCCTCAGCCGC	2.0	5.0	empirical	SMARCB1_+_24129228.23-P1|SMARCB1_-_24129238.23-P1
MEPCE	P1P2	1-2	nonessential	MEPCE_-_100026436.23-P1P2	GGAGAGGCCCGCGAACTGAC	1.0	1.0	predicted	MEPCE_-_100026461.23-P1P2	ACTCCCGACGCCCGCTCACC	2.0	2.0	predicted	MEPCE_-_100026436.23-P1P2|MEPCE_-_100026461.23-P1P2
ALDOA	P1P2	1-2	significant	ALDOA_+_30077139.23-P1P2	GGTCACCAGGACCCCTTCTG	1.0	2.0	empirical	ALDOA_+_30077177.23-P1P2	TGAATCCACTCGCCAGCCCC	2.0	1.0	empirical	ALDOA_+_30077139.23-P1P2|ALDOA_+_30077177.23-P1P2
NXF1	P1	1-2	significant	NXF1_+_62572883.23-P1	GTCCTGAGCGCTTGGGAGTT	1.0	1.0	empirical	NXF1_-_62572847.23-P1	TTGATCTTCGCTGTGGCATC	2.0	2.0	empirical	NXF1_+_62572883.23-P1|NXF1_-_62572847.23-P1
PCID2	P1	1-2	significant	PCID2_+_113862955.23-P1	GGGTGGCGCTCTCCGTTCGG	1.0	5.0	empirical	PCID2_+_113862975.23-P1	CCTACGCCTCAAGCGGGCCC	2.0	4.0	empirical	PCID2_+_113862955.23-P1|PCID2_+_113862975.23-P1
RTEL1	P1P2	1-2	significant	RTEL1_-_62289757.23-P1P2	GACGGGTGGCGGCCCTCGAC	1.0	2.0	empirical	RTEL1_+_62289914.23-P1P2	CCCTCGGGGCCGCGGGTCGC	2.0	5.0	empirical	RTEL1_-_62289757.23-P1P2|RTEL1_+_62289914.23-P1P2
PNISR	P2	1-2	essential	PNISR_+_99848916.23-P2	GTCGCAGTAGGAGTCGAGAT	1.0	1.0	predicted	PNISR_+_99848928.23-P2	ACTGCGACTGGCACGATTGC	2.0	2.0	predicted	PNISR_+_99848916.23-P2|PNISR_+_99848928.23-P2
NDUFA2	P1P2	1-2	significant	NDUFA2_+_140027134.23-P1P2	GGCAGCAAGTCGAGGAGTCG	1.0	3.0	empirical	NDUFA2_-_140027105.23-P1P2	CTTATGTCAGCGCTCGCCCC	2.0	2.0	empirical	NDUFA2_+_140027134.23-P1P2|NDUFA2_-_140027105.23-P1P2
FCF1	P1P2	1-2	essential	FCF1_+_75179898.23-P1P2	GGGACCGTCTTCTCTCACCA	1.0	3.0	essential	FCF1_-_75179892.23-P1P2	AACTCCTGGTTCTTCCGTAC	2.0	4.0	essential	FCF1_+_75179898.23-P1P2|FCF1_-_75179892.23-P1P2
TRAPPC5	P1P2	1-2	significant	TRAPPC5_+_7745760.23-P1P2	GGGGTGGGTAGGGTCTCACC	1.0	2.0	empirical	TRAPPC5_-_7745764.23-P1P2	GGAACCGCAGCAGTCTGCTC	2.0	1.0	empirical	TRAPPC5_+_7745760.23-P1P2|TRAPPC5_-_7745764.23-P1P2
VARS	P1P2	1-2	essential	VARS_+_31763457.23-P1P2	GTGCCGGGGCGGCGATCTTA	1.0	1.0	essential	VARS_+_31763097.23-P1P2	CACGGGAGCTCCTTCGCCGC	2.0	10.0	essential	VARS_+_31763457.23-P1P2|VARS_+_31763097.23-P1P2
SART3	P1P2	1-2	significant	SART3_+_108954728.23-P1P2	GGGCGTGAGCGAGAGCGATG	1.0	4.0	empirical	SART3_+_108954905.23-P1P2	AGGTTTCGGCCGCAGTCGCC	2.0	1.0	empirical	SART3_+_108954728.23-P1P2|SART3_+_108954905.23-P1P2
C7orf26	P1P2	1-2	significant	C7orf26_+_6629657.23-P1P2	GCCGCCGCGCAGCCGAACAG	1.0	3.0	empirical	C7orf26_+_6629704.23-P1P2	CAGTCGGACCTTCGGGCGCC	2.0	1.0	empirical	C7orf26_+_6629657.23-P1P2|C7orf26_+_6629704.23-P1P2
SPCS2	P1P2	1-2	significant	SPCS2_-_74660310.23-P1P2	GTCAGACAAGTCGGAGGGGA	1.0	4.0	empirical	SPCS2_+_74660597.23-P1P2	TTGCCCTCATCACACTTCAC	2.0	8.0	empirical	SPCS2_-_74660310.23-P1P2|SPCS2_+_74660597.23-P1P2
GLRX5	P1P2	1-2	significant	GLRX5_-_96001406.23-P1P2	GTGTGGGCCCGGGCCGTCGT	1.0	3.0	empirical	GLRX5_-_96001390.23-P1P2	ACAGCTGGCCACCCAGAGCC	2.0	6.0	empirical	GLRX5_-_96001406.23-P1P2|GLRX5_-_96001390.23-P1P2
TRMT10C	P1P2	1-2	essential	TRMT10C_-_101280737.23-P1P2	GGCTGTGTAGACTGTTGGGT	1.0	4.0	essential	TRMT10C_-_101280733.23-P1P2	AACAGTCTACACAGCCGACC	2.0	3.0	essential	TRMT10C_-_101280737.23-P1P2|TRMT10C_-_101280733.23-P1P2
PRELID1	P1P2	1-2	significant	PRELID1_-_176731244.23-P1P2	GAAGGTCCTGAAGGGAGGTT	1.0	9.0	empirical	PRELID1_+_176731181.23-P1P2	AGGTAGACCTTATCGGGGAC	2.0	10.0	empirical	PRELID1_-_176731244.23-P1P2|PRELID1_+_176731181.23-P1P2
TMEM127	P1P2	1-2	nonessential	TMEM127_+_96931644.23-P1P2	GAGCCGAGAAGCCCGTGACT	1.0	1.0	predicted	TMEM127_+_96931705.23-P1P2	GGACAGACCCGGGGCCGATC	2.0	2.0	predicted	TMEM127_+_96931644.23-P1P2|TMEM127_+_96931705.23-P1P2
DIMT1	P1P2	1-2	essential	DIMT1_+_61699702.23-P1P2	GTCCGGCGCTTGGGCCAGAG	1.0	3.0	essential	DIMT1_+_61699669.23-P1P2	CGTGGGGATCGCCGCCACGC	2.0	8.0	essential	DIMT1_+_61699702.23-P1P2|DIMT1_+_61699669.23-P1P2
COPA	P1P2	1-2	essential	COPA_+_160313005.23-P1P2	GAGGCGTCCGAAGGGCAGCA	1.0	3.0	essential	COPA_-_160313051.23-P1P2	CGGGAGAGGGTCGCTGACGC	2.0	8.0	essential	COPA_+_160313005.23-P1P2|COPA_-_160313051.23-P1P2
OR1D2	ENST00000331459.1	1-2	nonessential	OR1D2_-_2995858.23-ENST00000331459.1	GTAGGACCCAACACAAGGAA	1.0	1.0	predicted	OR1D2_-_2995835.23-ENST00000331459.1	TCCTCTATGGCCTCATACAC	2.0	2.0	predicted	OR1D2_-_2995858.23-ENST00000331459.1|OR1D2_-_2995835.23-ENST00000331459.1
NAA50	P1P2	1-2	significant	NAA50_+_113464573.23-P1P2	GAGCGGAGGCAAGACCCGGG	1.0	5.0	empirical	NAA50_+_113465067.23-P1P2	GACCCGCTGCCGCGCTGTGC	2.0	3.0	empirical	NAA50_+_113464573.23-P1P2|NAA50_+_113465067.23-P1P2
WARS	P1P2	1-2	significant	WARS_-_100841623.23-P1P2	GAAGATGGCAATACATACCC	1.0	1.0	empirical	WARS_+_100841441.23-P1P2	GGATCTCTGTTCCCTATGGC	2.0	5.0	empirical	WARS_-_100841623.23-P1P2|WARS_+_100841441.23-P1P2
NFATC2IP	P1P2	1-2	nonessential	NFATC2IP_+_28962358.23-P1P2	GACCGCTACCTCCGGACCAG	1.0	1.0	predicted	NFATC2IP_-_28962372.23-P1P2	CCGGACCAGCGGCCCCGCTC	2.0	2.0	predicted	NFATC2IP_+_28962358.23-P1P2|NFATC2IP_-_28962372.23-P1P2
EXOSC3	P1P2	1-2	essential	EXOSC3_+_37785000.23-P1P2	GTCGCGGCTGAATCTCTCGC	1.0	2.0	essential	EXOSC3_+_37785037.23-P1P2	TCGCGGGCTCCACCAAACAC	2.0	1.0	essential	EXOSC3_+_37785000.23-P1P2|EXOSC3_+_37785037.23-P1P2
HUWE1	P1P2	1-2	significant	HUWE1_-_53710518.23-P1P2	GCCCACTGCGGCGGCGACAA	1.0	4.0	empirical	HUWE1_+_53710912.23-P1P2	CCGCGGCTACTGCAGTCAGC	2.0	3.0	empirical	HUWE1_-_53710518.23-P1P2|HUWE1_+_53710912.23-P1P2
EIF1AX	P1P2	1-2	significant	EIF1AX_+_20159985.23-P1P2	GGGGCCCAGCCGGCGACGGG	1.0	3.0	empirical	EIF1AX_-_20159725.23-P1P2	CGGACCACGGCTCTGCTCGC	2.0	1.0	empirical	EIF1AX_+_20159985.23-P1P2|EIF1AX_-_20159725.23-P1P2
MED11	P1P2	1-2	significant	MED11_-_4635030.23-P1P2	GGCCTAGGGAGAGGCTACAC	1.0	6.0	empirical	MED11_-_4634925.23-P1P2	GTGCAGCCCGGTCACGCTTC	2.0	5.0	empirical	MED11_-_4635030.23-P1P2|MED11_-_4634925.23-P1P2
MED26	P1P2	1-2	significant	MED26_+_16738991.23-P1P2	GTGGAGTTTGGTTCTCGAGG	1.0	4.0	empirical	MED26_-_16738545.23-P1P2	CTCGCTTCTCGGGCCCGGGC	2.0	6.0	empirical	MED26_+_16738991.23-P1P2|MED26_-_16738545.23-P1P2
SHQ1	P1P2	1-2	nonessential	SHQ1_+_72897533.23-P1P2	GTTGCGTGGCGGGAACGCGG	1.0	1.0	predicted	SHQ1_+_72897517.23-P1P2	CTCGCTCTCACTGCCGCCGC	2.0	2.0	predicted	SHQ1_+_72897533.23-P1P2|SHQ1_+_72897517.23-P1P2
RINT1	P1P2	1-2	essential	RINT1_-_105172650.23-P1P2	GCATCGAGAGGAAGTCGCTG	1.0	1.0	essential	RINT1_+_105172659.23-P1P2	ACGGCCTCCGAGGCTGGGTC	2.0	4.0	essential	RINT1_-_105172650.23-P1P2|RINT1_+_105172659.23-P1P2
POLE	P1P2	1-2	essential	POLE_-_133263932.23-P1P2	GGCTACCACCTCTGCTTCAG	1.0	4.0	essential	POLE_+_133263949.23-P1P2	ACCCAGACTCGCGAGAGCCC	2.0	1.0	essential	POLE_-_133263932.23-P1P2|POLE_+_133263949.23-P1P2
LSM5	P1	1-2	significant	LSM5_-_32529957.23-P1	GGGCAGCAGCTGCGACGGGT	1.0	3.0	empirical	LSM5_-_32529937.23-P1	TTAGGTAATCGCCGTCCTTC	2.0	4.0	empirical	LSM5_-_32529957.23-P1|LSM5_-_32529937.23-P1
KRI1	P1P2	1-2	significant	KRI1_+_10676632.23-P1P2	GTCGCAGCTGCGGGTGAACG	1.0	1.0	empirical	KRI1_-_10676612.23-P1P2	CTACCGGGAGCGCGAGGAAC	2.0	3.0	empirical	KRI1_+_10676632.23-P1P2|KRI1_-_10676612.23-P1P2
SLC39A10	P1P2	1-2	significant	SLC39A10_-_196522142.23-P1P2	GGTCGGGGCTGGTTCCCTCG	1.0	2.0	empirical	SLC39A10_-_196521978.23-P1P2	CTCCGCTCGGTACCAAACCC	2.0	1.0	empirical	SLC39A10_-_196522142.23-P1P2|SLC39A10_-_196521978.23-P1P2
GMPS	P1P2	1-2	significant	GMPS_+_155588486.23-P1P2	GCCGAATGGAGCAACAGCAG	1.0	4.0	empirical	GMPS_-_155588366.23-P1P2	CAGATACCCTCCGCAGCCGC	2.0	3.0	empirical	GMPS_+_155588486.23-P1P2|GMPS_-_155588366.23-P1P2
RAE1	P1P2	1-2	significant	RAE1_-_55926344.23-P1P2	GTCAGGGCAGTTTCTACCGC	1.0	1.0	empirical	RAE1_+_55926696.23-P1P2	CTGGGAAGGGTCACATTGCC	2.0	4.0	empirical	RAE1_-_55926344.23-P1P2|RAE1_+_55926696.23-P1P2
KRT10	P1	1-2	nonessential	KRT10_-_38978838.23-P1	GGAGCTGTATCGAACAGACA	1.0	1.0	predicted	KRT10_-_38978663.23-P1	TGGGAGCTCTGGTGGGGGCC	2.0	2.0	predicted	KRT10_-_38978838.23-P1|KRT10_-_38978663.23-P1
SET	P1P2	1-2	significant	SET_+_131451919.23-P1P2	GCTCTCACCTGAGGTCTCGT	1.0	4.0	empirical	SET_-_131451955.23-P1P2	CCGGGCTCGCTGCTCTCACC	2.0	9.0	empirical	SET_+_131451919.23-P1P2|SET_-_131451955.23-P1P2
RPS4X	P1P2	1-2	essential	RPS4X_+_71497070.23-P1P2	GTACGCGCACCGGAAGACGG	1.0	3.0	essential	RPS4X_-_71497046.23-P1P2	TGGTAAGCCGTTTAGTTAGC	2.0	1.0	essential	RPS4X_+_71497070.23-P1P2|RPS4X_-_71497046.23-P1P2
CHTF18	P1P2	1-2	significant	CHTF18_-_838671.23-P1P2	GAGGTTCGGAGCGGGAGCTC	1.0	1.0	empirical	CHTF18_-_838687.23-P1P2	TACCGTCCGCGAGCCCGAGC	2.0	2.0	empirical	CHTF18_-_838671.23-P1P2|CHTF18_-_838687.23-P1P2
NSL1	P1P2	1-2	significant	NSL1_-_212965068.23-P1P2	GCCGCGAGCTCCTTGTCCCA	1.0	6.0	empirical	NSL1_+_212965083.23-P1P2	ACTCAGGAGACCCCGCCATC	2.0	10.0	empirical	NSL1_-_212965068.23-P1P2|NSL1_+_212965083.23-P1P2
TAF7	P1P2	1-2	significant	TAF7_+_140700244.23-P1P2	GATTTCGCGCTGCCCATCCC	1.0	1.0	empirical	TAF7_+_140700317.23-P1P2	TCCGGGTCGCCTACCCAGCC	2.0	4.0	empirical	TAF7_+_140700244.23-P1P2|TAF7_+_140700317.23-P1P2
SPATA5	P1P2	1-2	significant	SPATA5_-_123844261.23-P1P2	GTGAAGCGCGCACATTGAGT	1.0	1.0	empirical	SPATA5_-_123844278.23-P1P2	AAGCAGTAGAAAAGCCGACC	2.0	2.0	empirical	SPATA5_-_123844261.23-P1P2|SPATA5_-_123844278.23-P1P2
GATA1	P1P2	1-2	essential	GATA1_-_48645022.23-P1P2	GTGAGCTTGCCACATCCCCA	1.0	2.0	essential	GATA1_+_48644988.23-P1P2	GGGATCACACTGAGCTTGCC	2.0	1.0	essential	GATA1_-_48645022.23-P1P2|GATA1_+_48644988.23-P1P2
PMPCB	P1	1-2	essential	PMPCB_+_102937876.23-P1	GGAAGGAAGGTAGAGGATGA	1.0	8.0	essential	PMPCB_-_102938097.23-P1	ACTGTTCGGATCTGTGGCGC	2.0	1.0	essential	PMPCB_+_102937876.23-P1|PMPCB_-_102938097.23-P1
NDUFB8	P1P2	1-2	significant	NDUFB8_+_102289308.23-P1P2	GCGACTTGAAGCCTTCGGAG	1.0	10.0	empirical	NDUFB8_-_102289541.23-P1P2	CTGGGCGCACGGACAGGTCC	2.0	2.0	empirical	NDUFB8_+_102289308.23-P1P2|NDUFB8_-_102289541.23-P1P2
ARID3A	P1P2	1-2	significant	ARID3A_+_926082.23-P1P2	GGCTCCCGGCCCCCGACCCA	1.0	1.0	empirical	ARID3A_-_926025.23-P1P2	CCCGATTGGTAAGAGGCGCC	2.0	6.0	empirical	ARID3A_+_926082.23-P1P2|ARID3A_-_926025.23-P1P2
HAUS1	P1P2	1-2	essential	HAUS1_+_43684350.23-P1P2	GCGGCTCCCGCCACTTTACT	1.0	1.0	essential	HAUS1_-_43684365.23-P1P2	CCACTTTACTAGGAACTCCC	2.0	3.0	essential	HAUS1_+_43684350.23-P1P2|HAUS1_-_43684365.23-P1P2
TPR	P1P2	1-2	significant	TPR_-_186344344.23-P1P2	GAAATCGAGTCCACCCTCAG	1.0	3.0	empirical	TPR_-_186344310.23-P1P2	CGGGAGTCTCCGGCGGGCGC	2.0	4.0	empirical	TPR_-_186344344.23-P1P2|TPR_-_186344310.23-P1P2
ISY1	P1P2	1-2	significant	ISY1_+_128879801.23-P1P2	GACACCATGGTGAGTAGGGT	1.0	4.0	empirical	ISY1_-_128879876.23-P1P2	GTGGAGTTTCTTGGACAGGC	2.0	2.0	empirical	ISY1_+_128879801.23-P1P2|ISY1_-_128879876.23-P1P2
CYC1	P1P2	1-2	significant	CYC1_-_145149982.23-P1P2	GCAGGGGCCGACGGGAGTGG	1.0	4.0	empirical	CYC1_-_145149979.23-P1P2	CTCCCGTCGGCCCCTGGGGC	2.0	3.0	empirical	CYC1_-_145149982.23-P1P2|CYC1_-_145149979.23-P1P2
NDC80	P1P2	1-2	essential	NDC80_-_2571946.23-P1P2	GAGGCTCGGGAGAGGAAACG	1.0	5.0	essential	NDC80_-_2571961.23-P1P2	CCTTCAATTCTTCCCCGTTC	2.0	7.0	essential	NDC80_-_2571946.23-P1P2|NDC80_-_2571961.23-P1P2
RPL18	P1P2	1-2	essential	RPL18_-_49122442.23-P1P2	GAGGTCCGGAAAGAGAGAAC	1.0	2.0	essential	RPL18_-_49122404.23-P1P2	TCATGGTGAGCTCGCTTTGC	2.0	3.0	essential	RPL18_-_49122442.23-P1P2|RPL18_-_49122404.23-P1P2
RPL31	P1P2	1-2	essential	RPL31_-_101618787.23-P1P2	GGACGCTGCAGAGTGAGTAT	1.0	2.0	essential	RPL31_-_101618790.23-P1P2	CCCATACTCACTCTGCAGCC	2.0	3.0	essential	RPL31_-_101618787.23-P1P2|RPL31_-_101618790.23-P1P2
RPN1	P1P2	1-2	significant	RPN1_+_128369636.23-P1P2	GCTGCTCTTCCCGGTCATGG	1.0	4.0	empirical	RPN1_-_128369629.23-P1P2	CCGGCTTGTTTCTGCTCCTC	2.0	3.0	empirical	RPN1_+_128369636.23-P1P2|RPN1_-_128369629.23-P1P2
PHAX	P1	1-2	essential	PHAX_-_125936686.23-P1	GGGTCGGCGATATGGAAGAT	1.0	1.0	essential	PHAX_-_125936678.23-P1	TATCGCCGACCTCCAACGCC	2.0	5.0	essential	PHAX_-_125936686.23-P1|PHAX_-_125936678.23-P1
FARSB	P1P2	1-2	essential	FARSB_-_223520739.23-P1P2	GTAGGGCCGCCACTCACTGT	1.0	3.0	essential	FARSB_-_223520751.23-P1P2	TGGGCCGCACCTACAGTGAC	2.0	4.0	essential	FARSB_-_223520739.23-P1P2|FARSB_-_223520751.23-P1P2
GEMIN4	P1P2	1-2	significant	GEMIN4_-_655466.23-P1P2	GGCGGGACGCACGGCACGAT	1.0	2.0	empirical	GEMIN4_+_655371.23-P1P2	AGGTCCATGGCGGCGACGCC	2.0	1.0	empirical	GEMIN4_-_655466.23-P1P2|GEMIN4_+_655371.23-P1P2
GEMIN7	P1P2	1-2	significant	GEMIN7_-_45582556.23-P1P2	GCGGTGAGTACAAGGTGGTG	1.0	2.0	empirical	GEMIN7_-_45582583.23-P1P2	GGGAGAGGGAACCTGCTGGC	2.0	4.0	empirical	GEMIN7_-_45582556.23-P1P2|GEMIN7_-_45582583.23-P1P2
CTR9	P1P2	1-2	essential	CTR9_+_10772865.23-P1P2	GCAGAGGTGAGTGACGGCTC	1.0	4.0	essential	CTR9_+_10772881.23-P1P2	CTGGATTAGCCTGAAGCGGC	2.0	2.0	essential	CTR9_+_10772865.23-P1P2|CTR9_+_10772881.23-P1P2
TICRR	P1P2	1-2	essential	TICRR_-_90118737.23-P1P2	GCCCAAAGGAAAGCAGTGAG	1.0	3.0	essential	TICRR_+_90118911.23-P1P2	ATCTGAGTTGCCGATTCGGC	2.0	1.0	essential	TICRR_-_90118737.23-P1P2|TICRR_+_90118911.23-P1P2
DYNC1I2	P1P2	1-2	essential	DYNC1I2_+_172544609.23-P1P2	GGCGTCCGGAAGAAGCCAGT	1.0	9.0	essential	DYNC1I2_-_172544214.23-P1P2	CACCAGAACGAGGTCGCTCC	2.0	2.0	essential	DYNC1I2_+_172544609.23-P1P2|DYNC1I2_-_172544214.23-P1P2
ELP5	P1P2	1-2	significant	ELP5_+_7155888.23-P1P2	GAGCAGCACCAGGCCGCCCA	1.0	1.0	empirical	ELP5_-_7155875.23-P1P2	ACATCTCCAACTCGCGTCCC	2.0	2.0	empirical	ELP5_+_7155888.23-P1P2|ELP5_-_7155875.23-P1P2
TRNP1	P1P2	1-2	nonessential	TRNP1_+_27320231.23-P1P2	GCGGCTGTAGGTGCGCAGGG	1.0	1.0	predicted	TRNP1_+_27320260.23-P1P2	GTGGGGGGCGGGGGATGCCC	2.0	2.0	predicted	TRNP1_+_27320231.23-P1P2|TRNP1_+_27320260.23-P1P2
COG1	P1P2	1-2	significant	COG1_+_71189215.23-P1P2	GAGCGCGGGTGAGGTTGCCG	1.0	3.0	empirical	COG1_-_71189243.23-P1P2	CTTCAGCGCGGGTGAGGTTC	2.0	1.0	empirical	COG1_+_71189215.23-P1P2|COG1_-_71189243.23-P1P2
PSMB1	P1P2	1-2	significant	PSMB1_+_170862351.23-P1P2	GGCCGTGAGACAGCAAGTGT	1.0	2.0	empirical	PSMB1_+_170862342.23-P1P2	GCGGATCCGACACTTGCTGC	2.0	1.0	empirical	PSMB1_+_170862351.23-P1P2|PSMB1_+_170862342.23-P1P2
PSMD3	P1P2	1-2	significant	PSMD3_+_38137095.23-P1P2	GGCGTCGGGCCGCACGATGA	1.0	2.0	empirical	PSMD3_-_38137147.23-P1P2	AGCCGGGCCTGCACACGAGC	2.0	3.0	empirical	PSMD3_+_38137095.23-P1P2|PSMD3_-_38137147.23-P1P2
CCNL1	P1P2	1-2	significant	CCNL1_+_156877490.23-P1P2	GGTATCACCGTGCCCCGGGA	1.0	5.0	empirical	CCNL1_+_156877964.23-P1P2	GTGACCGCCGGGTTCTGGGC	2.0	2.0	empirical	CCNL1_+_156877490.23-P1P2|CCNL1_+_156877964.23-P1P2
ZNF506	P1P2	1-2	nonessential	ZNF506_-_19932561.23-P1P2	GGGCGTCAGCGAGAGACAAT	1.0	1.0	predicted	ZNF506_-_19932149.23-P1P2	ACAGGTCTTTCCCAGATTGC	2.0	2.0	predicted	ZNF506_-_19932561.23-P1P2|ZNF506_-_19932149.23-P1P2
PSMD2	P1P2	1-2	essential	PSMD2_+_184017090.23-P1P2	GCCGCCGCTGGAGACTGCTG	1.0	1.0	essential	PSMD2_-_184017084.23-P1P2	GCGCCTTGTCCCGGCCTCCC	2.0	4.0	essential	PSMD2_+_184017090.23-P1P2|PSMD2_-_184017084.23-P1P2
RPE	P1P2	1-2	significant	RPE_+_210867345.23-P1P2	GCAAGTTACCCACGAGTCCC	1.0	5.0	empirical	RPE_+_210867340.23-P1P2	TGCCGGGGACTCGTGGGTAC	2.0	1.0	empirical	RPE_+_210867345.23-P1P2|RPE_+_210867340.23-P1P2
[truncated: 381 more rows]
