# Supplementary figures and images for: Maximizing CRISPRi efficacy and accessibility with dual-sgRNA libraries and optimal effectors
Source: eLife journal article supplement (doi:10.7554/elife.81856), 2022-12-28

Figure 1 - Figure Supplement 1

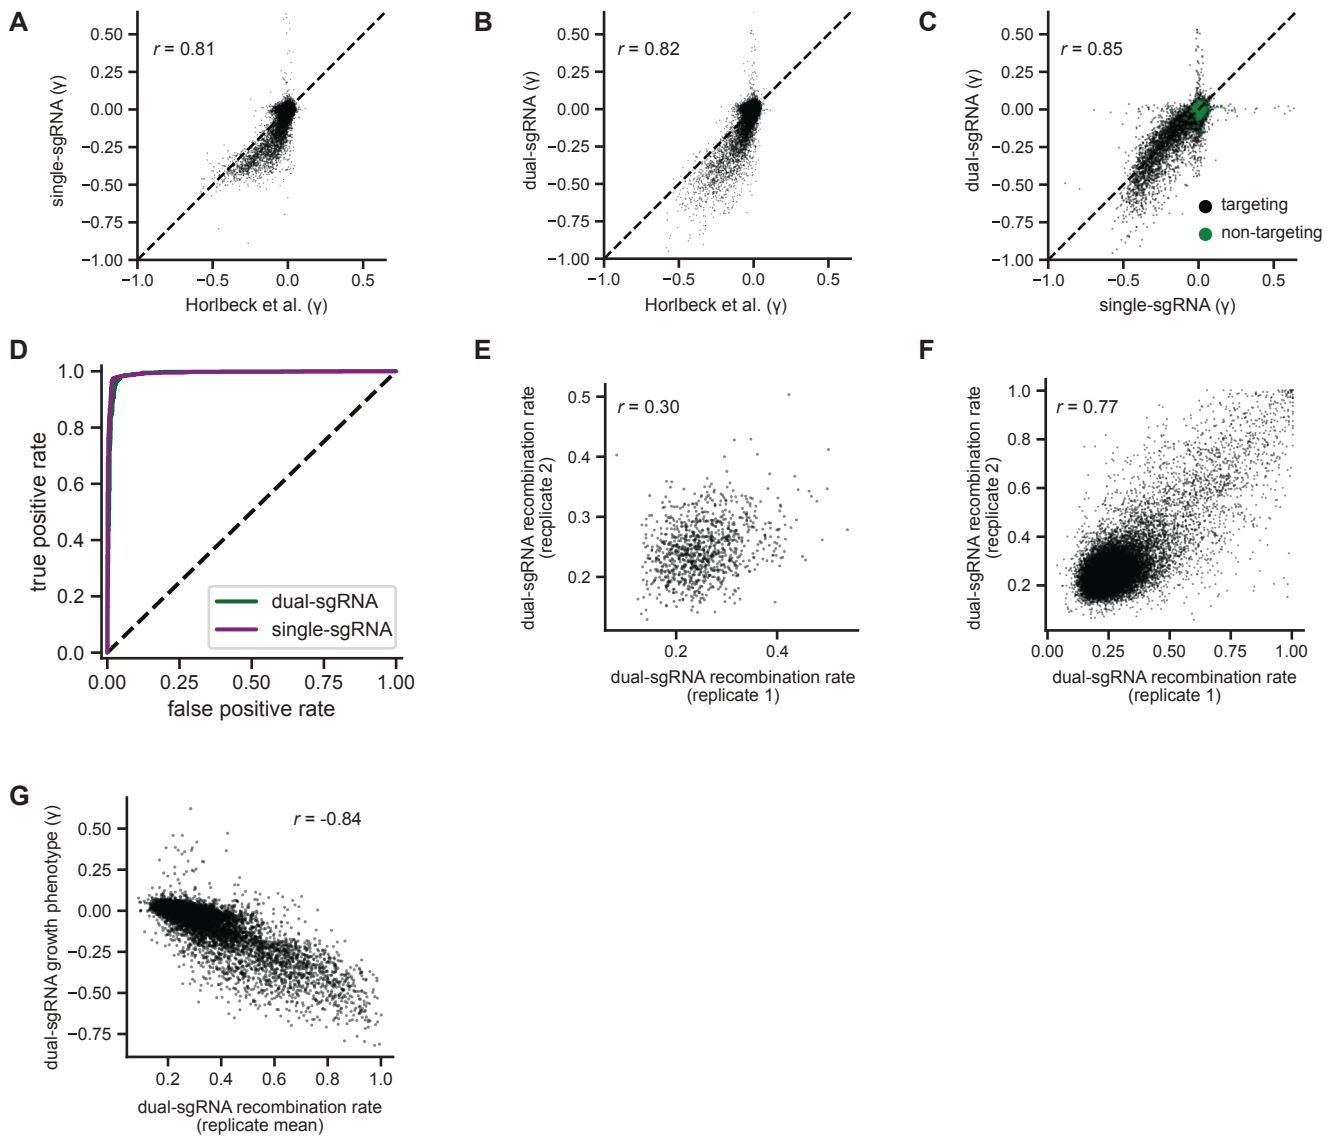

Supplement: supp [file elife_poa_e81856_Figure_1_figure_supplement_1.pdf › elife_poa_e81856_Figure_1_figure_supplement_1.pdf]

Figure 2 - Figure Supplement 1

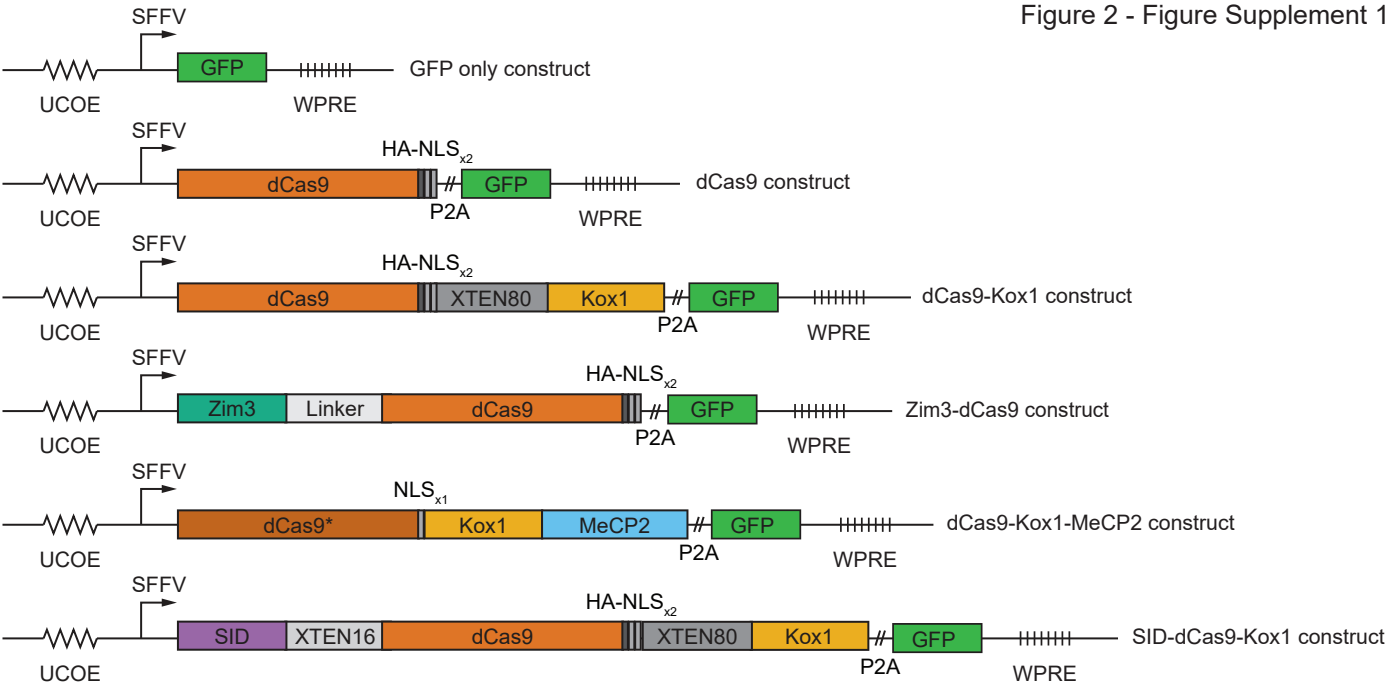

Supplement: supp [file elife_poa_e81856_Figure_2_figure_supplement_1.pdf › elife_poa_e81856_Figure_2_figure_supplement_1.pdf]

Figure 3 - Figure Supplement 1

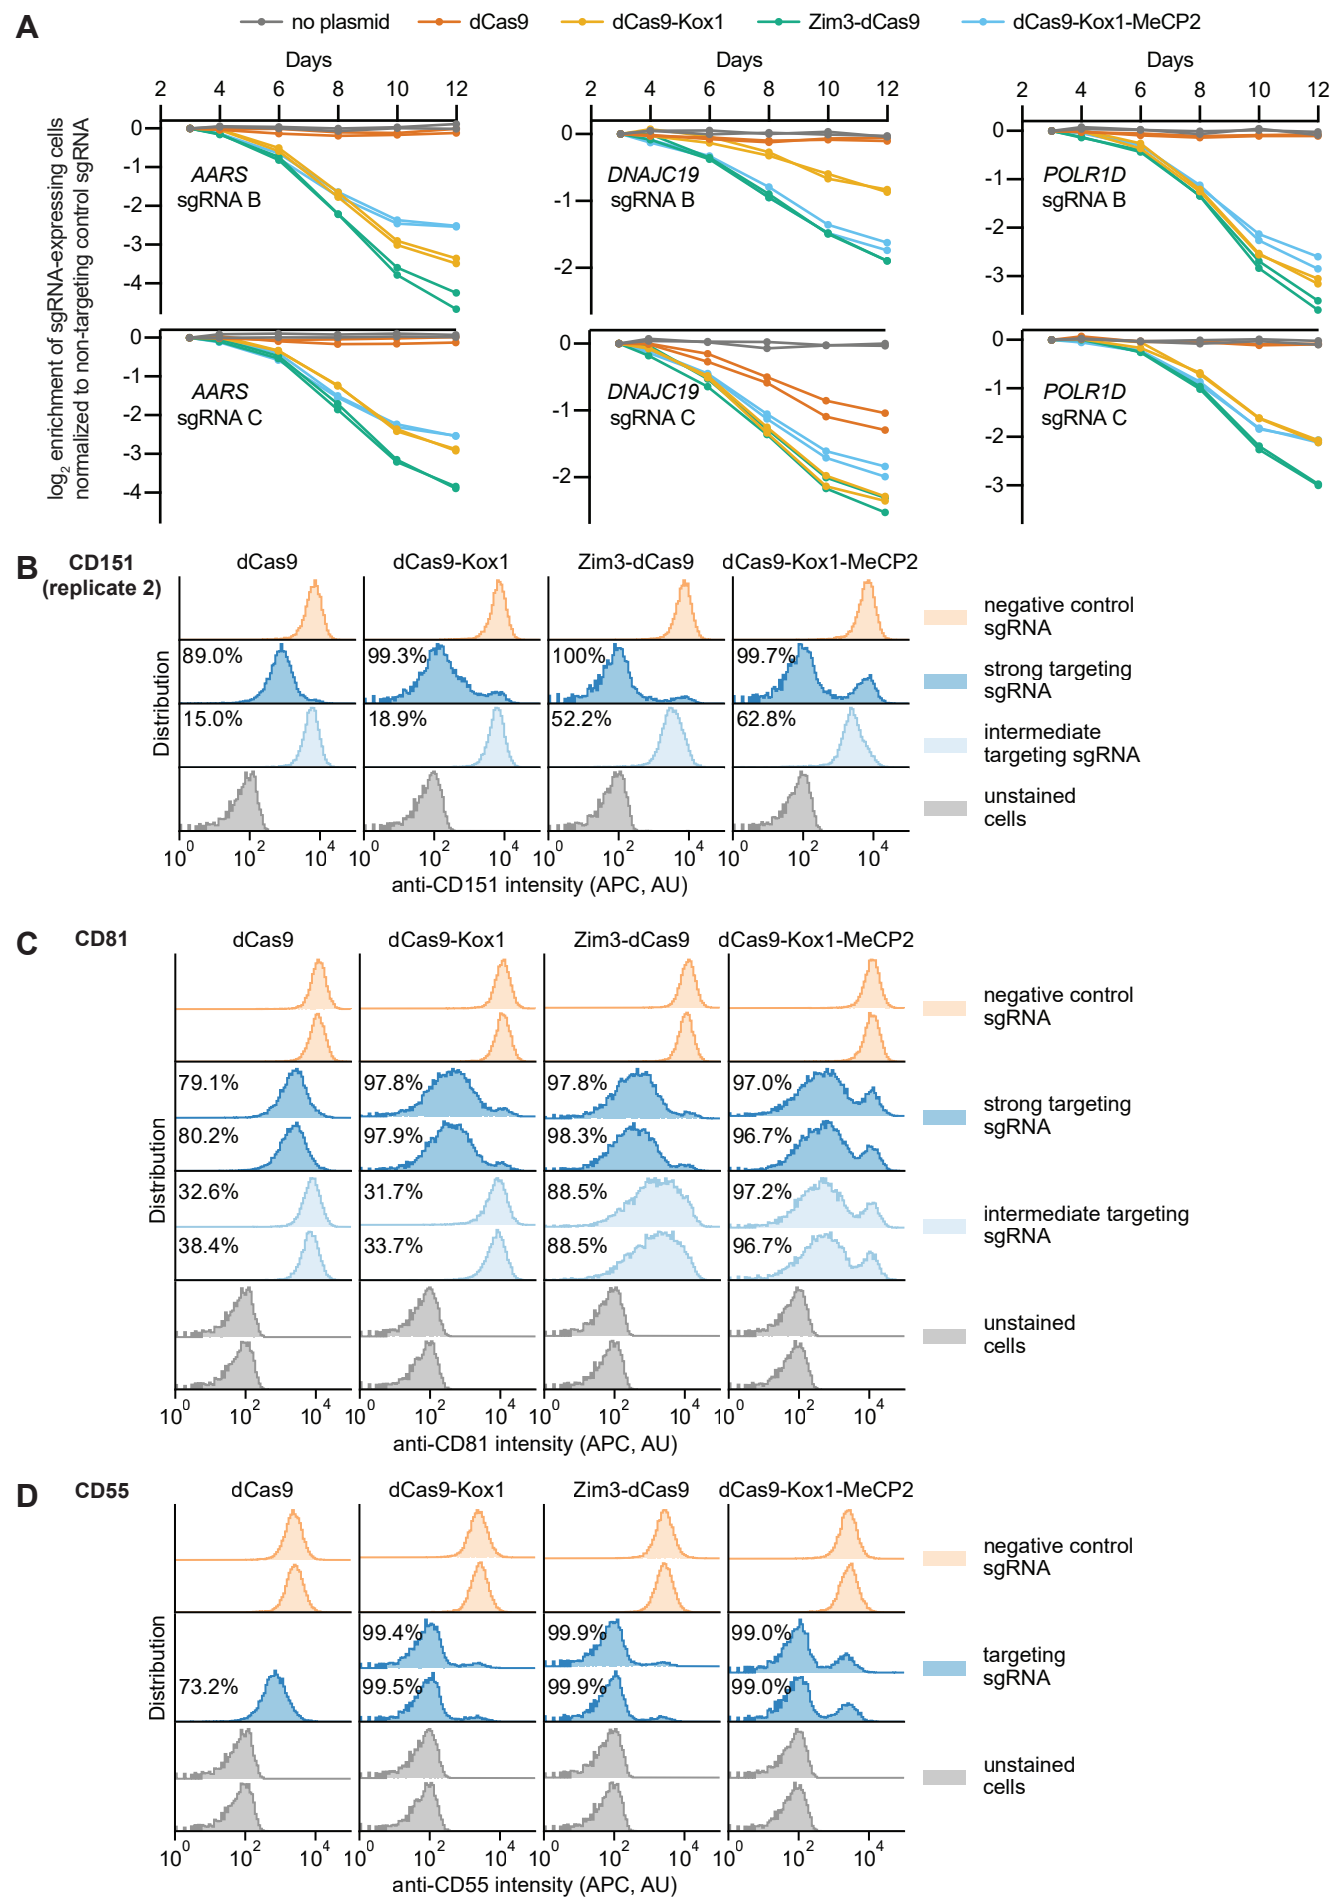

Supplement: supp [file elife_poa_e81856_Figure_3_figure_supplement_1.pdf › elife_poa_e81856_Figure_3_figure_supplement_1.pdf]

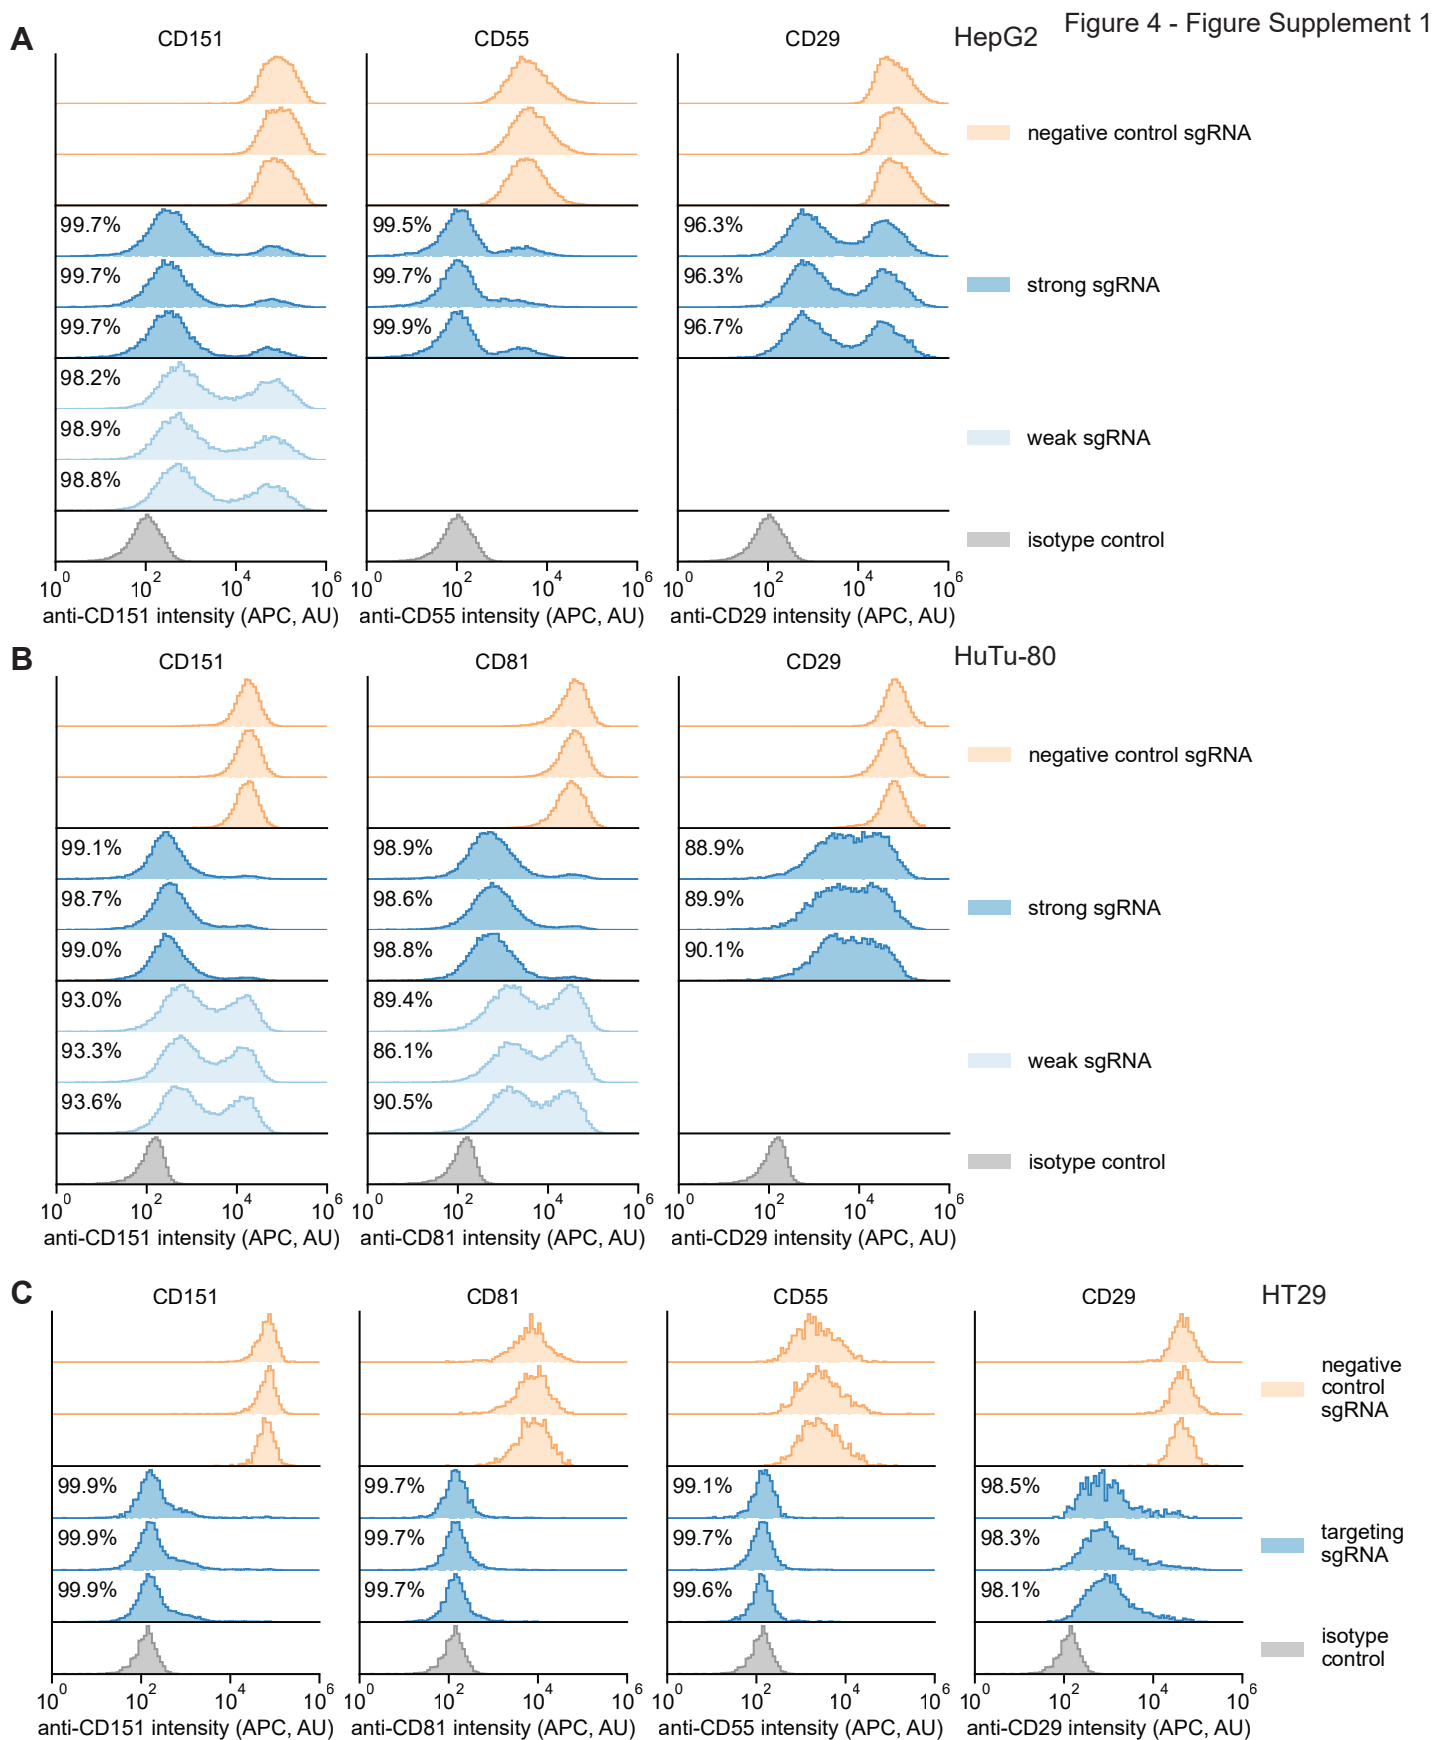

Supplement: supp [file elife_poa_e81856_Figure_4_figure_supplement_1.pdf › elife_poa_e81856_Figure_4_figure_supplement_1.pdf]

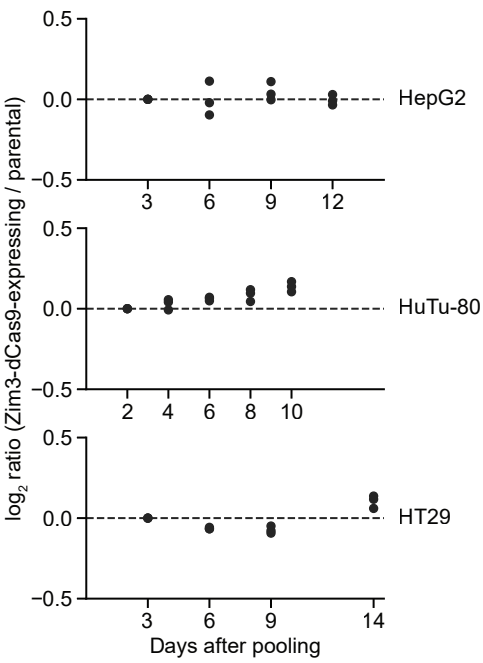

Supplement: supp [file elife_poa_e81856_Figure_4_figure_supplement_2.pdf › elife_poa_e81856_Figure_4_figure_supplement_2.pdf]
